# Supplementary material for: Activation of The Phosphatidylcholine to Lysophosphatidylcholine Pathway Is Associated with Osteoarthritis Knee Cartilage Volume Loss Over Time
Source: PubMed Central journal article supplement (PMC6609700; doi:10.1038/s41598-019-46185-w), 2019-07-04
Supplement: 41598_2019_46185_MOESM1_ESM.pdf [file 41598_2019_46185_MOESM1_ESM.pdf]

## Supplementary information

### Activation of The Phosphatidylcholine to Lysophosphatidylcholine Pathway Is Associated with Osteoarthritis Knee Cartilage Volume Loss Over Time

**Running title:** Phosphatidylcholine metabolic pathway and knee cartilage volume loss

Guangju Zhai<sup>1\*</sup>, Jean-Pierre Pelletier<sup>2</sup>, Ming Liu<sup>1</sup>, Dawn Aitken<sup>3</sup>, Edward Randell<sup>4</sup>, Proton Rahman<sup>5</sup>, Graeme Jones<sup>3</sup>, Johanne Martel-Pelletier<sup>2</sup>

<sup>1</sup>Discipline of Genetics, Faculty of Medicine, Memorial University of Newfoundland, St. John's, NL, Canada

<sup>2</sup>Osteoarthritis Research Unit, University of Montreal Hospital Research Centre (CRCHUM), Montreal, QC, Canada

<sup>3</sup>Menzies Research Institute, University of Tasmania, Hobart, Australia

<sup>4</sup>Department of Laboratory Medicine, Faculty of Medicine, Memorial University of Newfoundland, St. John's, NL, Canada

<sup>5</sup>Discipline of Medicine, Faculty of Medicine, Memorial University of Newfoundland, St. John's, NL, Canada

#### **\*Corresponding authors:**

Professor Guangju Zhai

Discipline of Genetics, Faculty of Medicine.  
Memorial University of Newfoundland.  
Craig L Dobbin Genetics Research Centre  
St. John's, NL, Canada, A1B 3V6  
Tel:709-864-6683; Fax:709-864-6531  
Email: [guangju.zhai@med.mun.ca](mailto:guangju.zhai@med.mun.ca)

Supplementary Table 1. Associations between the percentage of the lateral cartilage volume loss and each of the metabolite ratios

| <b>Metabolite ratios</b>       | <b>Beta</b>  | <b>Std. Error</b> | <b>Pr(&gt; t )</b> |
|--------------------------------|--------------|-------------------|--------------------|
| lysopcac182.pcaec443           | -0.214017045 | 0.041484112       | 8.53E-07           |
| lysopcac181.pcaec443           | -0.280482184 | 0.061877626       | 1.26E-05           |
| glutamine.pcaec443             | -0.282437292 | 0.063692508       | 1.88E-05           |
| methionine.transhydroxyproline | 0.085405776  | 0.019776385       | 2.99E-05           |
| h1.pcaec443                    | -0.201635033 | 0.047630834       | 4.20E-05           |
| histidine.transhydroxyproline  | 0.133896264  | 0.031694163       | 4.34E-05           |
| c3.pcaec443                    | 0.176094103  | 0.041738787       | 4.44E-05           |
| asparticacid.pcaec443          | 0.20563871   | 0.048879684       | 4.65E-05           |
| c4.pcaec443                    | 0.13432126   | 0.032122452       | 5.14E-05           |
| lysopcac204.pcaec443           | -0.261645701 | 0.063112247       | 5.90E-05           |
| c0.pcaec443                    | 0.233216518  | 0.057406014       | 8.13E-05           |
| arginine.transhydroxyproline   | 0.141392435  | 0.035252103       | 9.90E-05           |
| pcaec405.pcaec381              | -0.141200837 | 0.035228891       | 0.000100046        |
| h1.c181                        | -0.053484959 | 0.013617778       | 0.00013542         |
| lysopcac170.pcaec443           | -0.182116198 | 0.046709755       | 0.000150692        |
| glycine.pcaec443               | -0.173924527 | 0.044628815       | 0.000151677        |
| creatinine.c181                | 0.092115277  | 0.02385926        | 0.000173525        |
| c51dc.c181                     | 0.033444761  | 0.008670357       | 0.00017572         |
| pcaec383.pcaec381              | -0.087968051 | 0.022815492       | 0.000176851        |
| lysopcac161.pcaec381           | -0.05067899  | 0.01316           | 0.000179901        |
| pcaec424.pcaec443              | 0.385132728  | 0.100197026       | 0.000184754        |
| alanine.transhydroxyproline    | 0.064435353  | 0.016775567       | 0.000186618        |
| pcaec404.pcaec381              | -0.071646452 | 0.018755024       | 0.000201492        |
| pcaec425.pcaec381              | -0.03866764  | 0.010133065       | 0.000204564        |
| isoleucine.c181                | -0.042101792 | 0.011096343       | 0.0002215          |
| lysopcac170.c181               | -0.073061108 | 0.019300439       | 0.000228663        |
| alphaaminoadipicacid.pcaec443  | 0.212495981  | 0.056657174       | 0.00025952         |
| methioninesulfoxide.pcaec443   | -0.33514345  | 0.089389991       | 0.00026077         |
| pcaec322.c181                  | 0.021407459  | 0.005715791       | 0.000264479        |
| asparagine.pcaec443            | -0.133351243 | 0.03561279        | 0.000265284        |
| lysopcac140.pcaec381           | -0.039455412 | 0.010570112       | 0.00027676         |
| pcaec422.c5                    | -0.06092616  | 0.016329287       | 0.000278396        |
| leucine.c181                   | -0.043049351 | 0.01156423        | 0.000287009        |
| pcaec384.pcaec381              | -0.01711204  | 0.004601398       | 0.000290905        |
| pcaec321.pcaec443              | 0.058067464  | 0.015614658       | 0.000291009        |
| smohc222.pcaec381              | -0.040021658 | 0.010786619       | 0.000299997        |
| alanine.pcaec381               | 0.014037822  | 0.003789177       | 0.000306071        |
| lysopcac281.pcaec381           | -0.018179274 | 0.004922086       | 0.000318712        |
| pcaec402.pcaec381              | -0.035402882 | 0.009590025       | 0.000320738        |
| citruiline.c181                | 0.033715588  | 0.009136587       | 0.000322419        |
| pcaec344.c181                  | 0.022290739  | 0.006042488       | 0.000323773        |
| c2.pcaec443                    | 0.231104392  | 0.06264985        | 0.000323975        |
| methioninesulfoxide.pcaec381   | 0.047439374  | 0.012863757       | 0.000325127        |
| smc261.smc202                  | -0.181645538 | 0.049364174       | 0.000334696        |

|                        |              |             |             |
|------------------------|--------------|-------------|-------------|
| prolinr.pcaec381       | 0.024469371  | 0.006650144 | 0.00033491  |
| lysopcac160.pcaec381   | -0.052822964 | 0.014363389 | 0.000337203 |
| pcaac362.pcaec364      | -0.072014646 | 0.019583847 | 0.000337641 |
| pcaec340.pcaec381      | -0.010783589 | 0.002933506 | 0.000339136 |
| pcaac403.c5            | -0.092949696 | 0.025286561 | 0.000339322 |
| c141.c181              | 0.221027825  | 0.06014641  | 0.000340562 |
| asparticacid.pcaec381  | -0.024576731 | 0.006688614 | 0.000341068 |
| lysopcac203.pcaec381   | -0.050717106 | 0.013807039 | 0.000342449 |
| pcaac425.pcaec381      | -0.014301671 | 0.003895102 | 0.000344371 |
| smohc141.pcaec381      | -0.044531697 | 0.012131807 | 0.000345661 |
| pcaec420.pcaec381      | -0.010784925 | 0.002938819 | 0.000346696 |
| pcaec361.pcaec381      | -0.018857109 | 0.005139952 | 0.000348036 |
| asparagine.lysopcac181 | 0.107946119  | 0.029425584 | 0.000348393 |
| pcaec406.pcaec381      | -0.023795323 | 0.006487062 | 0.000348796 |
| pcaec300.pcaec381      | -0.019973546 | 0.005451891 | 0.000354448 |
| lysine.c181            | -0.053975195 | 0.014737241 | 0.000355833 |
| c141oh.pcaec381        | 0.051844486  | 0.014155742 | 0.000355919 |
| pcaec425.pcaec360      | -0.0132427   | 0.003618094 | 0.000358845 |
| pcaac403.pcaec381      | -0.028048741 | 0.007663925 | 0.000359215 |
| pcaac321.c181          | 0.015724052  | 0.004297101 | 0.000360004 |
| pcaec341.pcaec381      | -0.007433636 | 0.002032879 | 0.00036324  |
| pcaac424.pcaec381      | -0.048152369 | 0.013175567 | 0.000365869 |
| pcaac401.pcaec381      | -0.020159492 | 0.005519383 | 0.000368712 |
| pcaac402.pcaec381      | -0.08373029  | 0.022937945 | 0.000371592 |
| pcaec322.pcaec381      | -0.018046202 | 0.004944285 | 0.000372099 |
| pcaac420.pcaec381      | -0.020753475 | 0.005687922 | 0.000373711 |
| leucine.pcaec381       | 0.019057628  | 0.005223478 | 0.000374024 |
| pcaac426.pcaec381      | -0.009500725 | 0.002607403 | 0.000380312 |
| pcaec445.pcaec381      | -0.021106769 | 0.0057936   | 0.000381164 |
| pcaec382.pcaec381      | -0.036247337 | 0.009951651 | 0.00038221  |
| pcaec423.pcaec381      | -0.016829588 | 0.004620689 | 0.000382371 |
| isoleucine.pcaec381    | 0.018035761  | 0.004953101 | 0.000383616 |
| pcaac363.c181          | 0.016877397  | 0.004635387 | 0.000384047 |
| pcaec421.pcaec381      | -0.024937519 | 0.006849392 | 0.000384255 |
| pcaac404.pcaec443      | 0.08079884   | 0.022193329 | 0.000384466 |
| pcaac364.pcaec381      | -0.008375009 | 0.002300859 | 0.000385465 |
| histidine.c181         | -0.043917298 | 0.012073188 | 0.000388696 |
| pcaec424.pcaec381      | -0.018261527 | 0.005020454 | 0.000388921 |
| pcaac320.pcaec405      | -0.194807861 | 0.053565532 | 0.000389763 |
| pcaec301.pcaec381      | 0.024404743  | 0.006711228 | 0.000390327 |
| pcaac321.pcaec381      | -0.006795222 | 0.001868775 | 0.000390623 |
| pcaac323.pcaec381      | -0.026350659 | 0.007253156 | 0.000395065 |
| pcaac320.pcaec381      | -0.0058372   | 0.001606896 | 0.000395621 |
| pcaac341.pcaec381      | -0.006134374 | 0.001689165 | 0.00039701  |
| pcaec362.pcaec381      | -0.021064604 | 0.00580208  | 0.000398521 |

|                                     |              |             |             |
|-------------------------------------|--------------|-------------|-------------|
| pcaec443.pcaec360                   | -0.010822551 | 0.00298198  | 0.000400226 |
| pcaec321.pcaec381                   | -0.008618666 | 0.00237499  | 0.000400779 |
| pcaac421.pcaec381                   | -0.018255791 | 0.005032485 | 0.000402676 |
| pcaec444.pcaec381                   | -0.010713351 | 0.002953846 | 0.000403633 |
| pcaac281.pcaec381                   | -0.018991735 | 0.005238006 | 0.000405289 |
| pcaec360.pcaec381                   | -0.016523823 | 0.004559064 | 0.000407249 |
| asymmetricdimethylarginine.pcaec381 | -0.038887438 | 0.010733097 | 0.000409057 |
| smohc161.pcaec381                   | -0.061792564 | 0.017063507 | 0.000411669 |
| c4.pcaec381                         | -0.014574785 | 0.004025395 | 0.000412568 |
| h1.pcaec381                         | 0.023255315  | 0.006423387 | 0.000412999 |
| pcaec405.pcaec360                   | -0.011533767 | 0.003187476 | 0.000415847 |
| pcaac342.c181                       | 0.017179371  | 0.004748495 | 0.000416739 |
| pcaec364.pcaec381                   | -0.021272444 | 0.005880789 | 0.000417589 |
| pcaac386.pcaec381                   | -0.008762358 | 0.00242274  | 0.000418418 |
| pcaac300.pcaec381                   | -0.011365014 | 0.003142949 | 0.00041942  |
| pcaec446.pcaec381                   | -0.012644712 | 0.003496908 | 0.000419517 |
| pcaec385.pcaec381                   | -0.019171306 | 0.005303319 | 0.000421005 |
| methioninesulfoxide.pcaac341        | -0.028313425 | 0.007834212 | 0.000422326 |
| pcaac383.pcaec364                   | -0.054731422 | 0.015144574 | 0.000422541 |
| methionine.pcaec381                 | 0.016745884  | 0.004635715 | 0.000424878 |
| smc261.pcaac341                     | -0.037258563 | 0.01031424  | 0.000424909 |
| pcaac404.pcaec381                   | -0.009851729 | 0.002728286 | 0.000426983 |
| lysine.pcaec381                     | 0.023504727  | 0.006510036 | 0.000427616 |
| pcaac386.c181                       | 0.019967276  | 0.005532845 | 0.000430143 |
| pcaec422.pcaec381                   | -0.012149818 | 0.003366959 | 0.000430625 |
| pcaac363.pcaec381                   | -0.007258699 | 0.002012258 | 0.000432602 |
| c162.pcaec381                       | -0.034956638 | 0.009691441 | 0.00043303  |
| pcaac383.pcaec381                   | -0.008362048 | 0.00231922  | 0.000435193 |
| pcaec380.pcaec381                   | -0.036903793 | 0.010239184 | 0.000437293 |
| pcaac362.c181                       | 0.023818352  | 0.006611029 | 0.000439375 |
| pcaac344.pcaec381                   | -0.009515313 | 0.002641695 | 0.000440686 |
| pcaac361.pcaec381                   | -0.007220268 | 0.002005278 | 0.000442766 |
| pcaec401.pcaec381                   | -0.017662557 | 0.00490593  | 0.000443365 |
| pcaac384.pcaec381                   | -0.014926183 | 0.004150143 | 0.00044916  |
| pcaec424.c5                         | -0.06389298  | 0.017765546 | 0.000449306 |
| lysopcac182.pcaec381                | 0.023210651  | 0.006453982 | 0.000449502 |
| pcaac424.pcaec360                   | -0.011232884 | 0.003123643 | 0.000449889 |
| pcaec401.c181                       | 0.039599003  | 0.011013212 | 0.000450669 |
| pcaac385.pcaec381                   | -0.016181721 | 0.004500782 | 0.000451108 |
| pcaac342.pcaec381                   | -0.00743928  | 0.002069261 | 0.000451385 |
| pcaac406.pcaec381                   | -0.011379308 | 0.003165977 | 0.000452797 |
| alanine.pcaec443                    | -0.103230776 | 0.028741352 | 0.000456834 |
| pcaac366.pcaec381                   | -0.023755656 | 0.006617668 | 0.000460021 |
| pcaec401.pcaac341                   | -0.017504659 | 0.004877937 | 0.000461951 |
| pcaec360.c181                       | 0.036527282  | 0.010183365 | 0.000464517 |

|                            |              |             |             |
|----------------------------|--------------|-------------|-------------|
| c51dc.pcaec381             | -0.013680085 | 0.003814806 | 0.000465994 |
| pcaac360.pcaac341          | -0.025460972 | 0.00710085  | 0.00046669  |
| arginine.pcaec381          | 0.025644707  | 0.007155286 | 0.000469312 |
| pcaac383.c181              | 0.01908422   | 0.005324886 | 0.000469402 |
| smc161.pcaec381            | -0.024962694 | 0.006969287 | 0.000472952 |
| pcaac322.pcaec381          | -0.009004595 | 0.00251399  | 0.000472985 |
| smohc241.pcaac341          | -0.015922081 | 0.004445377 | 0.000473114 |
| pcaac343.pcaec381          | -0.008773399 | 0.002450563 | 0.000475702 |
| c102.pcaec381              | -0.007948312 | 0.002221219 | 0.000478707 |
| pcaec423.c5                | -0.067965716 | 0.019005848 | 0.000482594 |
| pcaac406.c181              | 0.025390372  | 0.007100562 | 0.000482959 |
| smc241.pcaec381            | -0.024863716 | 0.006956769 | 0.000485995 |
| c102.pcaec443              | 0.066878103  | 0.018712258 | 0.000486004 |
| phenylalanine.pcaec381     | 0.063966564  | 0.017904392 | 0.000488304 |
| smc180.pcaec381            | -0.030760756 | 0.008612128 | 0.000489806 |
| smc181.pcaec381            | -0.093071452 | 0.026065132 | 0.000491637 |
| pcaac422.pcaec360          | -0.011668841 | 0.003267978 | 0.000491748 |
| acetylmethionine.pcaec381  | -0.015835125 | 0.004436433 | 0.000494026 |
| c18.pcaac341               | -0.021637955 | 0.006062199 | 0.000494049 |
| smc261.pcaec360            | -0.013875942 | 0.003887567 | 0.000494068 |
| pcaec423.pcaac341          | -0.010563021 | 0.002961768 | 0.000499013 |
| pcaec365.pcaec381          | -0.019261624 | 0.005401158 | 0.000499458 |
| pcaec342.pcaec381          | -0.014309808 | 0.004014816 | 0.00050287  |
| pcaac365.pcaec381          | -0.020878152 | 0.005863993 | 0.000509664 |
| pcaac341.c181              | 0.013542828  | 0.003804526 | 0.000510974 |
| pcaac361.c181              | 0.015883532  | 0.00446339  | 0.000512822 |
| pcaac240.pcaec381          | -0.088772797 | 0.024958476 | 0.000516056 |
| smc241.pcaac341            | -0.025595778 | 0.007200388 | 0.000519736 |
| pcaec386.pcaec381          | -0.025529553 | 0.007181833 | 0.000519803 |
| c14.pcaec381               | -0.036234818 | 0.010193494 | 0.000519876 |
| pcaec363.pcaec381          | -0.011647629 | 0.003279315 | 0.000525058 |
| pcaac403.pcaac341          | -0.016565997 | 0.004665298 | 0.000526797 |
| prolinr.c181               | -0.052424852 | 0.014765042 | 0.000527331 |
| c102.c181                  | 0.017397224  | 0.004902997 | 0.000531606 |
| smc160.pcaec381            | -0.014908494 | 0.004204717 | 0.000536474 |
| pcaac380.pcaec381          | -0.017464652 | 0.004927059 | 0.000538376 |
| pcaac362.pcaec381          | -0.010376002 | 0.002928117 | 0.000540371 |
| pcaac281.pcaac341          | -0.052568307 | 0.014843712 | 0.000544366 |
| pcaec383.pcaac341          | -0.039203856 | 0.011072522 | 0.000545896 |
| pcaac405.pcaec381          | -0.017802381 | 0.0050299   | 0.000548426 |
| pcaec380.pcaac341          | -0.020094759 | 0.005679987 | 0.000551273 |
| histidine.pcaec321         | 0.034679467  | 0.009811119 | 0.000557242 |
| lysine.transhydroxyproline | 0.106920291  | 0.030255481 | 0.000558782 |
| smohc241.pcaec381          | -0.0215499   | 0.006098552 | 0.000559373 |
| pcaec383.pcaac386          | -0.112854094 | 0.031952326 | 0.000562593 |

|                               |              |             |             |
|-------------------------------|--------------|-------------|-------------|
| pcaec343.pcaec381             | -0.011941783 | 0.003381214 | 0.000562884 |
| glutamicacid.pcaec381         | 0.048415974  | 0.013710749 | 0.000563979 |
| methionine.c5                 | 0.065936482  | 0.018698987 | 0.000573895 |
| pcaec363.c181                 | 0.026102534  | 0.007403215 | 0.000574627 |
| smohc221.pcaec381             | -0.025200858 | 0.007149234 | 0.000576348 |
| c51dc.pcaec443                | 0.110382085  | 0.031328344 | 0.000579505 |
| pcaac421.pcaec360             | -0.010058423 | 0.002856589 | 0.000584056 |
| alphaaminoadipicacid.pcaec381 | -0.039182432 | 0.011129309 | 0.000585021 |
| pcaec445.pcaac341             | -0.012748639 | 0.003621134 | 0.000585085 |
| histidine.pcaec381            | 0.018696556  | 0.005313551 | 0.000589071 |
| lysopcac203.pcaec321          | 0.039825349  | 0.01132946  | 0.000596136 |
| pcaac425.pcaec360             | -0.013361693 | 0.003801508 | 0.000596883 |
| pcaac360.pcaec381             | -0.033057847 | 0.00941007  | 0.000600626 |
| pcaac426.c181                 | 0.020447176  | 0.005821538 | 0.00060207  |
| c3.pcaec381                   | -0.020568097 | 0.005861982 | 0.000609601 |
| pcaec402.pcaac341             | -0.018219047 | 0.005192709 | 0.000609907 |
| serine.c181                   | -0.053916528 | 0.015372966 | 0.000612755 |
| pcaac380.pcaac341             | -0.01615761  | 0.004608606 | 0.000615433 |
| pcaac383.pcaec443             | 0.067511931  | 0.019273459 | 0.000622082 |
| pcaec381.pcaac341             | -0.031207134 | 0.008913446 | 0.000625764 |
| arginine.pcaec321             | 0.037199924  | 0.010640006 | 0.000636398 |
| pcaec365.pcaec364             | 0.066195023  | 0.018947117 | 0.000642021 |
| pcaac341.pcaec300             | -0.275338149 | 0.078825988 | 0.000643535 |
| pcaec443.pcaac341             | -0.017219275 | 0.004931067 | 0.000645726 |
| lysopcac182.c181              | -0.0486626   | 0.013935476 | 0.000645734 |
| glutamine.pcaec360            | 0.016169839  | 0.004639822 | 0.000661397 |
| pcaec446.pcaac341             | -0.011528989 | 0.003310232 | 0.000666357 |
| methionine.pcaec321           | 0.017151889  | 0.004926675 | 0.000669565 |
| lysopcac140.pcaec321          | 0.035599665  | 0.01023423  | 0.000676353 |
| pcaac426.pcaac341             | -0.021940029 | 0.006309914 | 0.000679644 |
| pcaec363.pcaec321             | 0.020746359  | 0.005966723 | 0.000679788 |
| kynurenine.pcaec381           | -0.017914782 | 0.005152482 | 0.000679992 |
| pcaec380.pcaac386             | -0.040258006 | 0.011581004 | 0.000681654 |
| pcaac404.pcaec321             | 0.040557696  | 0.011676203 | 0.000687926 |
| pcaac422.pcaac341             | -0.015231549 | 0.004385977 | 0.000689697 |
| pcaec343.pcaac341             | -0.013876256 | 0.003995818 | 0.000689907 |
| pcaac422.pcaec381             | -0.046203402 | 0.013308008 | 0.000691903 |
| creatinine.pcaec321           | 0.025492127  | 0.007345433 | 0.00069517  |
| pcaec301.pcaec321             | -0.045276271 | 0.013047308 | 0.000695909 |
| methionine.lysopcac170        | -0.048620261 | 0.014012817 | 0.000697011 |
| pcaac425.pcaac341             | -0.017061516 | 0.004917744 | 0.000697776 |
| pcaac421.pcaac341             | -0.010901872 | 0.003142327 | 0.000697813 |
| pcaac424.pcaac341             | -0.023666874 | 0.006825002 | 0.000701857 |
| pcaac403.pcaac386             | -0.040943301 | 0.01180772  | 0.000702265 |
| pcaac322.pcaac341             | 0.016776907  | 0.004838471 | 0.000702515 |

|                                    |              |             |             |
|------------------------------------|--------------|-------------|-------------|
| pcaac381.pcaac386                  | -0.041268003 | 0.011902184 | 0.000702841 |
| serine.pcaec381                    | 0.024858528  | 0.007169536 | 0.000702888 |
| citrusline.pcaec381                | -0.014098712 | 0.004073868 | 0.000718606 |
| pcaec422.c181                      | 0.026018547  | 0.007519348 | 0.000719969 |
| pcaac420.pcaac341                  | -0.01274887  | 0.003685222 | 0.000721828 |
| pcaac403.pcaec443                  | 0.213197266  | 0.061630729 | 0.000722293 |
| pcaec382.pcaac341                  | -0.031282869 | 0.009048934 | 0.000727711 |
| c0.transhydroxyproline             | -0.084163365 | 0.024372339 | 0.000737313 |
| asparagine.pcaec381                | 0.022778495  | 0.006600412 | 0.000742762 |
| pcaec420.c181                      | 0.022255386  | 0.006451754 | 0.000746725 |
| glycine.pcaec321                   | 0.030626193  | 0.008879177 | 0.000747474 |
| pcaec340.c181                      | 0.02232535   | 0.006473488 | 0.000748695 |
| smc241.pcaec360                    | -0.01465544  | 0.004250118 | 0.000749953 |
| pcaac402.pcaac341                  | -0.017564445 | 0.005097926 | 0.000757218 |
| lysopcac182.pcaec321               | 0.033012994  | 0.009585416 | 0.000760637 |
| pcaac320.c181                      | 0.012254201  | 0.003558777 | 0.000762479 |
| c2.pcaec381                        | -0.03427095  | 0.009959564 | 0.000768636 |
| pcaec403.pcaec360                  | -0.016998783 | 0.004940588 | 0.000769602 |
| c18.pcaec381                       | -0.024476543 | 0.007118269 | 0.00077508  |
| smc261.pcaec381                    | 0.116044234  | 0.033788164 | 0.000785917 |
| c51.pcaac341                       | -0.008017306 | 0.002334369 | 0.000785918 |
| pcaac424.pcaac386                  | -0.034051673 | 0.009915221 | 0.000786401 |
| pcaec342.c181                      | 0.03072505   | 0.008948756 | 0.000788643 |
| ornithine.pcaec381                 | 0.070625051  | 0.020576527 | 0.000791679 |
| pcaac383.pcaec321                  | 0.019768155  | 0.005761539 | 0.000795062 |
| asymmetricdimethylarginine.pcaec32 | 0.015613742  | 0.004551754 | 0.000797182 |
| pcaac403.pcaec360                  | -0.012405205 | 0.003616681 | 0.000797919 |
| c3.pcaec321                        | -0.054892182 | 0.016006282 | 0.000799496 |
| pcaec321.pcaac341                  | -0.042745617 | 0.012474707 | 0.000807209 |
| pcaec445.pcaec321                  | -0.073798864 | 0.021537589 | 0.000807395 |
| pcaec341.c181                      | 0.015367089  | 0.004486061 | 0.000810122 |
| pcaac361.pcaec443                  | 0.0578963    | 0.016924847 | 0.00082321  |
| pcaac406.pcaec443                  | 0.089524418  | 0.026190844 | 0.000830569 |
| pcaec343.pcaec321                  | 0.036869582  | 0.010794376 | 0.000837702 |
| pcaac360.pcaac386                  | -0.029756269 | 0.008712566 | 0.000838555 |
| pcaec364.pcaac341                  | -0.023680416 | 0.006937068 | 0.00084345  |
| pcaac362.pcaec321                  | 0.016690112  | 0.004891201 | 0.000847258 |
| pcaec404.pcaac386                  | -0.061246073 | 0.017949604 | 0.000847716 |
| pcaec403.pcaac386                  | -0.06039557  | 0.017705239 | 0.000850422 |
| c14.c181                           | 0.07103609   | 0.020828998 | 0.000852514 |
| pcaac402.pcaec360                  | -0.014011746 | 0.004108521 | 0.000852604 |
| pcaac366.pcaac341                  | -0.02744723  | 0.008049313 | 0.00085412  |
| smohc141.pcaac341                  | -0.029474072 | 0.008651864 | 0.000863431 |
| pcaec404.pcaec360                  | -0.017094294 | 0.005018352 | 0.000864355 |
| smc240.pcaec381                    | -0.017698659 | 0.005197986 | 0.000868593 |

|                              |              |             |             |
|------------------------------|--------------|-------------|-------------|
| asparagine.pcaec321          | 0.019467794  | 0.005719519 | 0.000871998 |
| pcaec405.pcaac386            | -0.034641275 | 0.010177406 | 0.000872009 |
| pcaec362.pcaec321            | 0.022418389  | 0.0065879   | 0.000874302 |
| pcaac401.c5                  | -0.071580812 | 0.021037294 | 0.000875473 |
| pcaac342.pcaec321            | 0.015720568  | 0.004620275 | 0.000875619 |
| pcaac343.pcaec321            | 0.0135337    | 0.003978647 | 0.000878382 |
| pcaec342.pcaec321            | 0.034302657  | 0.010084388 | 0.00087845  |
| pcaac363.pcaec321            | 0.013722663  | 0.004035605 | 0.0008819   |
| serotonin.pcaec321           | -0.023104087 | 0.006795735 | 0.000883701 |
| pcaac322.pcaec322            | -0.137407051 | 0.040422136 | 0.000885162 |
| pcaac384.lysopcac180         | 0.211547195  | 0.062267211 | 0.000890825 |
| c142.pcaec321                | 0.032026268  | 0.009434127 | 0.000898913 |
| pcaec382.pcaec443            | 0.268275498  | 0.079055784 | 0.000902638 |
| pcaac322.pcaec321            | 0.013922472  | 0.004105067 | 0.00090862  |
| pcaec424.pcaec360            | -0.017749867 | 0.005234259 | 0.000909961 |
| lysopcac140.pcaac386         | 0.050104787  | 0.014780669 | 0.000913667 |
| pcaac364.lysopcac180         | 0.151097063  | 0.044576992 | 0.000914623 |
| pcaec423.pcaac386            | -0.039205177 | 0.011584575 | 0.000931117 |
| c51dc.pcaec321               | -0.041211329 | 0.012191511 | 0.000943475 |
| citruline.pcaec321           | 0.020485173  | 0.006061089 | 0.000945204 |
| c16.pcaec443                 | 0.205793398  | 0.060914808 | 0.000949666 |
| methioninesulfoxide.pcaac386 | -0.039497878 | 0.01169319  | 0.000951348 |
| lysopcac161.pcaac341         | -0.017622912 | 0.005218405 | 0.000953853 |
| pcaac361.pcaec321            | 0.046032973  | 0.013632351 | 0.00095489  |
| pcaac420.pcaec360            | -0.014055251 | 0.004162755 | 0.000955898 |
| pcaec401.pcaac386            | -0.103473859 | 0.030659044 | 0.000960537 |
| pcaec300.pcaac341            | 0.016973965  | 0.005029588 | 0.000961065 |
| pcaec403.pcaac341            | -0.022783013 | 0.006754161 | 0.000966364 |
| pcaec443.pcaac386            | -0.030223782 | 0.008965139 | 0.000972618 |
| pcaac380.pcaac386            | -0.054248637 | 0.016099086 | 0.000977793 |
| pcaec406.pcaac341            | -0.017770536 | 0.005274273 | 0.000979054 |
| pcaac341.pcaec443            | 0.048236761  | 0.014324847 | 0.000985425 |
| pcaec424.pcaac341            | -0.012174916 | 0.003615662 | 0.000985682 |
| c16.pcaec381                 | -0.035310941 | 0.010486685 | 0.000985862 |
| pcaac300.c181                | 0.022419421  | 0.006658988 | 0.000987268 |
| pcaac402.pcaac386            | -0.045212871 | 0.013454218 | 0.001008264 |
| pcaec425.pcaac341            | -0.011067596 | 0.003295503 | 0.001015378 |
| pcaec422.pcaac341            | -0.013462555 | 0.004013009 | 0.00102788  |
| serotonin.pcaec422           | -0.098286675 | 0.029299126 | 0.001028341 |
| pcaec423.c181                | 0.033958655  | 0.01012808  | 0.001034097 |
| c181.pcaec321                | -0.066708376 | 0.019896575 | 0.001034665 |
| pcaec444.pcaec321            | 0.051610178  | 0.015402357 | 0.001041449 |
| smc240.pcaec321              | 0.025827504  | 0.007708255 | 0.001042033 |
| glutamine.pcaec381           | 0.085189664  | 0.025440867 | 0.00104933  |
| alanine.c181                 | -0.027916256 | 0.008342892 | 0.00105784  |



|                               |              |             |             |
|-------------------------------|--------------|-------------|-------------|
| c16.pcaec360                  | 0.033741798  | 0.010090952 | 0.001066134 |
| c0.pcaec381                   | -0.032415171 | 0.009706844 | 0.001081693 |
| c141.pcaec321                 | 0.038786127  | 0.011616577 | 0.001083688 |
| pcaec341.pcaec321             | 0.068234126  | 0.020444334 | 0.001088396 |
| glycine.lysopcac181           | 0.134313779  | 0.040255274 | 0.001092041 |
| alanine.pcaec321              | 0.016896192  | 0.005067797 | 0.001101228 |
| pcaec402.pcaac386             | -0.078782258 | 0.023636249 | 0.001104596 |
| pcaac344.pcaec321             | 0.021491825  | 0.006449958 | 0.00110836  |
| pcaac421.pcaac386             | -0.030330958 | 0.009107056 | 0.001114256 |
| glutamine.pcaec321            | 0.02471364   | 0.007424765 | 0.001121484 |
| pcaac366.pcaac386             | -0.052595062 | 0.015806699 | 0.001125777 |
| pcaec421.pcaac386             | -0.057202642 | 0.017193134 | 0.001127001 |
| pcaac425.c5                   | -0.047127521 | 0.01417156  | 0.001132861 |
| lysopcac140.c181              | 0.071106348  | 0.021386003 | 0.001135112 |
| pcaec444.c5                   | -0.046814138 | 0.014088769 | 0.001143054 |
| pcaec321.c181                 | 0.017070372  | 0.005142475 | 0.00115567  |
| c101.pcaec381                 | -0.04030432  | 0.012145108 | 0.001159202 |
| pcaac401.pcaac341             | -0.013455608 | 0.004057059 | 0.001166798 |
| smc240.pcaac341               | -0.025621557 | 0.00772561  | 0.001167366 |
| pcaec422.pcaac386             | -0.037705248 | 0.011370356 | 0.001168694 |
| c0.pcaec321                   | -0.024995371 | 0.007542711 | 0.001177453 |
| citruline.pcaac341            | 0.016429449  | 0.004960593 | 0.001184686 |
| pcaec340.pcaac341             | 0.046665512  | 0.014094704 | 0.001189154 |
| lysine.pcaec321               | 0.050441294  | 0.015236284 | 0.001190142 |
| c14.pcaac386                  | 0.043950839  | 0.01327988  | 0.001194171 |
| lysopcac204.pcaec381          | 0.042594454  | 0.012876123 | 0.001200352 |
| lysopcac204.pcaec321          | -0.051090661 | 0.015472861 | 0.001224635 |
| pcaec421.pcaac341             | -0.014099596 | 0.004273394 | 0.00123503  |
| pcaac405.pcaec443             | 0.11903204   | 0.036082882 | 0.001237231 |
| pcaec382.pcaec321             | 0.082968666  | 0.025152104 | 0.00123794  |
| pcaac343.c181                 | 0.016726656  | 0.005076846 | 0.001254297 |
| pcaac364.c181                 | 0.016382922  | 0.004973775 | 0.001257744 |
| pcaac426.pcaec321             | 0.036210511  | 0.011001099 | 0.001267411 |
| pcaac401.pcaec360             | -0.014336027 | 0.004359319 | 0.001279746 |
| smohc221.pcaac341             | -0.024707167 | 0.007516357 | 0.001285962 |
| c12.pcaec321                  | 0.102127422  | 0.031070505 | 0.00128665  |
| putrescine.pcaec381           | -0.058168887 | 0.017709944 | 0.001296949 |
| lysopcac170.pcaac386          | -0.077906719 | 0.023727793 | 0.001301987 |
| lysopcac170.pcaec381          | 0.028911169  | 0.00880559  | 0.001302323 |
| alphaaminoadipicacid.pcaec321 | -0.039565917 | 0.01205384  | 0.00130593  |
| pcaac322.pcaac386             | 0.041454177  | 0.012633342 | 0.001310666 |
| pcaac425.pcaac386             | -0.038933963 | 0.011867471 | 0.001313257 |
| pcaac341.pcaec321             | 0.05197772   | 0.015848116 | 0.001317526 |
| pcaac343.pcaec322             | -0.147801793 | 0.04506699  | 0.001318128 |
| lysopcac161.smohc222          | 0.040595558  | 0.012379403 | 0.001319513 |

|                                    |              |             |             |
|------------------------------------|--------------|-------------|-------------|
| lysopcac203.lysopcac181            | 0.183136853  | 0.055935786 | 0.001342341 |
| pcaac383.pcaac341                  | 0.021155109  | 0.006472003 | 0.001366058 |
| phenylalanine.pcaac341             | -0.013482583 | 0.004125527 | 0.001368852 |
| pcaec421.pcaec360                  | -0.016013205 | 0.004907137 | 0.001390711 |
| creatinine.pcaec381                | -0.035265335 | 0.010807382 | 0.001391482 |
| citruiline.pcaac402                | 0.087909017  | 0.026958381 | 0.001401358 |
| pcaec425.pcaac386                  | -0.039839487 | 0.012224957 | 0.001410785 |
| c0.c181                            | 0.063210504  | 0.019403191 | 0.001415994 |
| smc241.pcaec364                    | 0.052580275  | 0.016144542 | 0.001420128 |
| lysopcac280.pcaec360               | -0.014567194 | 0.004473152 | 0.001421342 |
| pcaac366.c181                      | 0.045514908  | 0.01399616  | 0.001442979 |
| pcaac365.c181                      | 0.04009627   | 0.012344299 | 0.001460957 |
| pcaac401.c181                      | 0.038019585  | 0.011716132 | 0.001475785 |
| pcaac323.pcaec321                  | 0.034316897  | 0.010583444 | 0.00148812  |
| lysopcac160.pcaac341               | -0.012948137 | 0.003999877 | 0.001514375 |
| lysopcac181.pcaec381               | 0.039945178  | 0.012345658 | 0.001522123 |
| pcaec381.pcaec360                  | -0.015359638 | 0.004747579 | 0.001523648 |
| prolinr.pcaac341                   | -0.021970799 | 0.006799778 | 0.001544344 |
| lysopcac280.pcaac341               | 0.02123467   | 0.006572508 | 0.001545715 |
| histidine.lysopcac181              | 0.093313532  | 0.02889317  | 0.001551887 |
| pcaec403.pcaec381                  | 0.135546063  | 0.041981504 | 0.001556408 |
| pcaec362.lysopcac181               | 0.115477201  | 0.035782702 | 0.001564156 |
| pcaec380.pcaec360                  | -0.011189942 | 0.003471122 | 0.001581787 |
| pcaac344.lysopcac181               | 0.096474741  | 0.029927231 | 0.001582199 |
| citruiline.pcaec422                | 0.078683511  | 0.024441584 | 0.001604907 |
| acetylorithoine.smohc222           | 0.008791897  | 0.002731321 | 0.001606623 |
| serotonin.pcaec381                 | 0.079108482  | 0.024576448 | 0.001606852 |
| pcaec404.pcaac341                  | -0.015124938 | 0.004701622 | 0.001616834 |
| smohc221.pcaec321                  | 0.05685561   | 0.017674502 | 0.001617599 |
| asparticacid.c181                  | 0.049253226  | 0.015314313 | 0.001621054 |
| leucine.pcaac341                   | -0.014147165 | 0.004399883 | 0.001625292 |
| pcaac425.pcaec321                  | 0.044564488  | 0.013865384 | 0.001631972 |
| pcaac385.lysopcac180               | 0.160241329  | 0.049857596 | 0.001632512 |
| pcaac323.c181                      | 0.046072651  | 0.01434643  | 0.001646001 |
| pcaac281.c181                      | 0.035927733  | 0.011189035 | 0.001648448 |
| h1.pcaec360                        | 0.01800331   | 0.005614499 | 0.001672071 |
| asymmetricdimethylarginine.lysopca | -0.04927506  | 0.015369274 | 0.001674768 |
| lysopcac280.pcaec381               | -0.062289283 | 0.019431387 | 0.001677336 |
| pcaac363.pcaec364                  | -0.035160953 | 0.010974128 | 0.001686108 |
| pcaac404.c181                      | 0.01831918   | 0.005726389 | 0.001713008 |
| acetylorithoine.pcaac341           | -0.032318788 | 0.010110433 | 0.001726887 |
| pcaac381.pcaec381                  | -0.115284946 | 0.036072022 | 0.001730298 |
| alanine.pcaac341                   | 0.010719073  | 0.003354353 | 0.001732499 |
| pcaec424.pcaac386                  | -0.061742349 | 0.019328973 | 0.001739664 |
| citruiline.c141                    | -0.12707449  | 0.039782479 | 0.001739987 |

|                               |              |             |             |
|-------------------------------|--------------|-------------|-------------|
| pcaac420.pcaac386             | -0.042485812 | 0.013309893 | 0.001752274 |
| pcaec382.c181                 | 0.067822691  | 0.021252267 | 0.001756409 |
| pcaec322.pcaac341             | -0.019096075 | 0.005985257 | 0.001760921 |
| pcaac341.pcaac386             | 0.053348294  | 0.016727586 | 0.00176818  |
| methioninesulfoxide.c181      | -0.075306264 | 0.023627242 | 0.001779456 |
| smohc241.pcaec321             | -0.073684151 | 0.023127043 | 0.00178636  |
| methioninesulfoxide.pcaec360  | -0.011480431 | 0.003605164 | 0.001795684 |
| pcaec341.pcaac341             | 0.067562496  | 0.021219229 | 0.001798102 |
| pcaec405.pcaac341             | -0.014008902 | 0.004401404 | 0.001805027 |
| pcaac320.c141                 | -0.099143794 | 0.031183686 | 0.001825303 |
| lysopcac182.pcaac341          | -0.01054393  | 0.003318899 | 0.001839488 |
| c16.c181                      | 0.073510057  | 0.023146408 | 0.001845772 |
| c3.smohc222                   | -0.021500898 | 0.006770767 | 0.001847698 |
| pcaac344.pcaec322             | -0.179512571 | 0.056560816 | 0.001858102 |
| c3.transhydroxyproline        | -0.117787288 | 0.037126876 | 0.00186548  |
| c5.pcaec321                   | -0.089566185 | 0.028256164 | 0.001882103 |
| pcaec444.pcaac341             | -0.010801745 | 0.003408129 | 0.001884434 |
| kynurenine.pcaec321           | 0.066634351  | 0.021033863 | 0.001893209 |
| acetylmithoine.pcaec321       | -0.076957792 | 0.024295855 | 0.001895807 |
| pcaac343.pcaec422             | 0.055108779  | 0.01740711  | 0.001905848 |
| c51.pcaec381                  | -0.027627555 | 0.008726871 | 0.001906301 |
| c8.pcaec321                   | 0.060279571  | 0.01904456  | 0.001910072 |
| pcaec362.c181                 | 0.039852209  | 0.012592762 | 0.001913094 |
| pcaac405.pcaac386             | 0.056298075  | 0.017816048 | 0.001942237 |
| pcaac422.pcaac386             | -0.030302372 | 0.009597878 | 0.001959499 |
| pcaac380.c181                 | 0.032764164  | 0.010396209 | 0.001995136 |
| pcaec420.pcaec321             | 0.03154017   | 0.010008121 | 0.001995718 |
| pcaec365.pcaac341             | -0.016956215 | 0.00538189  | 0.002001145 |
| citruline.smohc222            | 0.005796177  | 0.001840184 | 0.002006413 |
| pcaac342.pcaec322             | -0.142343286 | 0.04519263  | 0.002006929 |
| glycine.pcaec381              | 0.038359588  | 0.012186055 | 0.002018959 |
| pcaac321.pcaac386             | 0.063491115  | 0.020169899 | 0.002019033 |
| pcaec401.pcaec321             | 0.032901329  | 0.010461586 | 0.002037448 |
| pcaec421.pcaec443             | 0.180257418  | 0.057351852 | 0.00205018  |
| pcaac363.pcaac386             | 0.040334409  | 0.012837692 | 0.002057606 |
| alphaaminoadipicacid.smohc222 | -0.014459898 | 0.004603312 | 0.002062058 |
| pcaac320.lysopcac180          | 0.120040377  | 0.038218386 | 0.00206395  |
| pcaec361.pcaec321             | 0.086883585  | 0.027707307 | 0.002097982 |
| c5.smohc222                   | -0.043850486 | 0.013990674 | 0.002108    |
| glutamicacid.smohc222         | -0.020225195 | 0.006453616 | 0.002110234 |
| pcaec386.pcaac341             | -0.02105262  | 0.006722781 | 0.002126366 |
| pcaec381.pcaac386             | -0.047071524 | 0.015045053 | 0.002145554 |
| lysopcac281.pcaec321          | -0.057007169 | 0.01822634  | 0.002152161 |
| smc261.pcaec443               | -0.153952573 | 0.049243395 | 0.002161573 |
| pcaac343.lysopcac181          | 0.075051072  | 0.024016008 | 0.002170614 |

|                           |              |             |             |
|---------------------------|--------------|-------------|-------------|
| pcaec361.pcaac341         | -0.024778824 | 0.007944903 | 0.002213752 |
| pcaac422.pcaec321         | 0.053609911  | 0.017199392 | 0.002226875 |
| pcaac365.smohc222         | 0.015394781  | 0.004943355 | 0.002246175 |
| alanine.lysopcac170       | -0.044475378 | 0.014284553 | 0.002251211 |
| pcaac342.pcaac380         | -0.179552251 | 0.057680412 | 0.002255833 |
| c181.smohc222             | 0.026994426  | 0.008675242 | 0.002264537 |
| c16.pcaec321              | -0.084726188 | 0.027273214 | 0.002301252 |
| c10.pcaec321              | 0.068978559  | 0.022204627 | 0.002301808 |
| c51dc.pcaec360            | 0.009002175  | 0.002900015 | 0.002318672 |
| pcaec444.c181             | 0.019550225  | 0.006304918 | 0.002343614 |
| pcaec361.c181             | 0.033376799  | 0.010776151 | 0.002369651 |
| pcaec341.pcaec443         | 0.053387129  | 0.017240215 | 0.002374292 |
| asparticacid.pcaec360     | -0.014136349 | 0.004565658 | 0.002377491 |
| smohc222.pcaec321         | 0.093060301  | 0.030090949 | 0.002404595 |
| pcaec340.pcaec443         | 0.075097767  | 0.02428902  | 0.002410611 |
| pcaac281.pcaec321         | 0.088173824  | 0.028540165 | 0.002428692 |
| pcaec423.pcaec321         | 0.049469504  | 0.016016647 | 0.002435068 |
| pcaac343.pcaac386         | 0.062067803  | 0.020117323 | 0.002460754 |
| pcaac363.pcaec443         | 0.052776043  | 0.017110311 | 0.002467201 |
| lysopcac170.pcaac341      | -0.012378209 | 0.004027628 | 0.002554878 |
| pcaec301.pcaac341         | 0.027858822  | 0.009068444 | 0.002565005 |
| lysopcac180.pcaac341      | -0.010863486 | 0.003540244 | 0.002593199 |
| pcaac240.pcaec360         | -0.022005057 | 0.007177404 | 0.002615111 |
| pcaac320.pcaec443         | 0.041617908  | 0.013583412 | 0.002631534 |
| pcaac300.pcaec321         | 0.049732375  | 0.016238915 | 0.002642529 |
| pcaec361.pcaec443         | 0.125698071  | 0.04108041  | 0.002665219 |
| glutamine.smohc222        | 0.012074788  | 0.003954553 | 0.002719117 |
| c2.pcaec321               | -0.075618535 | 0.024773433 | 0.002727474 |
| pcaec446.c181             | 0.022914394  | 0.007508464 | 0.002732544 |
| smc160.pcaec360           | -0.020825822 | 0.006824153 | 0.002732776 |
| leucine.pcaec321          | -0.046098083 | 0.015107389 | 0.002736366 |
| pcaac344.pcaac386         | 0.043120273  | 0.014134641 | 0.002742166 |
| creatinine.c2             | 0.123597707  | 0.04052338  | 0.002747691 |
| lysopcac140.lysopcac181   | 0.095289684  | 0.031304326 | 0.002799984 |
| c51dc.transhydroxyproline | -0.048955761 | 0.016092497 | 0.002815964 |
| pcaac360.pcaec360         | -0.008300258 | 0.002728939 | 0.002821035 |
| lysopcac160.pcaec321      | 0.081204556  | 0.026707937 | 0.002830735 |
| pcaac402.pcaec443         | 0.41917049   | 0.137907092 | 0.00283912  |
| pcaac385.pcaac386         | 0.062972215  | 0.020730594 | 0.002855637 |
| pcaac405.c181             | 0.029803836  | 0.009815828 | 0.002867569 |
| pcaac426.pcaec443         | 0.066888196  | 0.022033839 | 0.002872921 |
| c10.pcaec364              | -0.053517817 | 0.01763135  | 0.00287582  |
| pcaec300.c181             | 0.033141452  | 0.010921553 | 0.002883672 |
| c2.pcaac386               | 0.053197478  | 0.017543342 | 0.002903011 |
| smc241.smohc222           | 0.012784322  | 0.004221095 | 0.002936249 |

|                      |              |             |             |
|----------------------|--------------|-------------|-------------|
| pcaec384.pcaac341    | -0.017656437 | 0.005836816 | 0.002969755 |
| c162.pcaec321        | -0.071760222 | 0.023730368 | 0.00297923  |
| serine.pcaac341      | -0.00768955  | 0.002544201 | 0.002994014 |
| pcaac366.pcaec321    | 0.040918883  | 0.013543276 | 0.003003668 |
| pcaec363.spermidine  | 0.155442971  | 0.051475541 | 0.00301856  |
| c101.pcaec321        | 0.051093606  | 0.016922107 | 0.00302233  |
| c16.lysopcac180      | 0.274957994  | 0.091100329 | 0.003033113 |
| smc261.pcaac386      | -0.040477935 | 0.013419209 | 0.003049766 |
| pcaac342.pcaec443    | 0.052211045  | 0.017313512 | 0.00305725  |
| isoleucine.pcaac341  | -0.017294657 | 0.00574323  | 0.003098233 |
| pcaac322.spermidine  | 0.159252859  | 0.052907649 | 0.00311065  |
| pcaec342.smc261      | 0.149234783  | 0.049597159 | 0.003121009 |
| smohc222.pcaac341    | -0.012694514 | 0.004219434 | 0.00312444  |
| pcaac405.c0          | 0.005996289  | 0.001993747 | 0.003134425 |
| smc202.pcaac341      | -0.01467838  | 0.004883009 | 0.003149305 |
| pcaac386.pcaec321    | 0.046739113  | 0.01555098  | 0.003153869 |
| lysopcac140.c0       | 0.009148888  | 0.003047518 | 0.003187698 |
| pcaac385.smohc222    | 0.012400508  | 0.004131234 | 0.003191928 |
| asparagine.c0        | -0.013377238 | 0.004456885 | 0.003193608 |
| prolinr.c0           | 0.002629784  | 0.000876238 | 0.003196125 |
| pcaac386.pcaec443    | 0.061287836  | 0.020439761 | 0.003223385 |
| pcaac343.pcaec403    | 0.188319211  | 0.062837016 | 0.003238437 |
| pcaec363.smc261      | 0.127981668  | 0.042725787 | 0.003253682 |
| c2.pcaec360          | 0.019342951  | 0.006458997 | 0.003260591 |
| lysopcac182.c0       | -0.001670571 | 0.00055806  | 0.003272597 |
| methionine.c181      | -0.026929714 | 0.009002378 | 0.003294124 |
| pcaac344.pcaac341    | 0.021762497  | 0.00727604  | 0.003298365 |
| c182.smohc222        | 0.027866921  | 0.009325935 | 0.003327564 |
| c181.c0              | -0.002882167 | 0.000964621 | 0.003329974 |
| pcaac401.pcaac386    | -0.039783603 | 0.013315157 | 0.003330292 |
| lysopcac280.pcaec321 | -0.054031285 | 0.01809951  | 0.003357051 |
| smc241.smc202        | -0.125455071 | 0.042040783 | 0.003368465 |
| pcaec362.smc261      | 0.081862571  | 0.027436291 | 0.003372544 |
| pcaec445.c0          | -0.00079512  | 0.000266502 | 0.003374544 |
| pcaec385.c0          | -0.000908346 | 0.000304668 | 0.003396403 |
| pcaec422.pcaec443    | 0.084097982  | 0.028209078 | 0.003398431 |
| pcaac406.pcaac341    | -0.047094459 | 0.015798188 | 0.003400873 |
| pcaec301.c0          | -0.001960409 | 0.000658693 | 0.003451166 |
| c141oh.pcaec321      | 0.04407323   | 0.014812945 | 0.003460588 |
| citruiline.c0        | -0.000745647 | 0.000250696 | 0.003471333 |
| c4.pcaec321          | -0.073490931 | 0.024708963 | 0.00347179  |
| pcaac240.pcaac386    | -0.069617965 | 0.023411972 | 0.003478771 |
| isoleucine.pcaec321  | -0.049449747 | 0.016637905 | 0.003494673 |
| histidine.pcaec443   | -0.100458445 | 0.033805733 | 0.003499745 |
| lysopcac181.pcaac341 | -0.009184493 | 0.00309195  | 0.00351246  |

|                               |              |             |             |
|-------------------------------|--------------|-------------|-------------|
| lysopcac204.c0                | -0.00154309  | 0.000519677 | 0.003524613 |
| pcaec365.smohc161             | -0.07879357  | 0.0265366   | 0.003525485 |
| arginine.pcaec342             | 0.206151009  | 0.069487713 | 0.003552672 |
| pcaac343.pcaac341             | 0.029480919  | 0.009939556 | 0.003560339 |
| alanine.c5                    | 0.042806858  | 0.014436009 | 0.003568352 |
| pcaec446.c0                   | -0.000805889 | 0.000271808 | 0.003572303 |
| smohc241.smohc161             | -0.041048884 | 0.0138451   | 0.003572885 |
| smc241.pcaac386               | -0.045422483 | 0.015326828 | 0.003586802 |
| pcaec360.pcaec321             | -0.087906782 | 0.029740136 | 0.003672684 |
| c182.pcaec381                 | -0.055402541 | 0.01874741  | 0.003679618 |
| phenylalanine.c181            | -0.08311315  | 0.028143085 | 0.003701806 |
| pcaac341.lysopcac180          | 0.098042796  | 0.033208406 | 0.003711804 |
| c14.pcaec443                  | 0.158887511  | 0.053880289 | 0.003750953 |
| pcaec343.c181                 | 0.019598102  | 0.00664603  | 0.003751582 |
| pcaec445.smohc222             | 0.007119516  | 0.002415738 | 0.003771068 |
| c12.c0                        | 0.003083167  | 0.001046253 | 0.003774215 |
| pcaec445.c2                   | 0.078120771  | 0.026533913 | 0.003805043 |
| c18.transhydroxyproline       | -0.085835668 | 0.029158235 | 0.00380964  |
| c162.pcaec443                 | 0.145677725  | 0.049498016 | 0.00381758  |
| glutamine.lysopcac181         | 0.102119832  | 0.034717893 | 0.003837144 |
| smc202.pcaec381               | 0.045503202  | 0.015470465 | 0.003838576 |
| pcaec446.smohc222             | 0.007304277  | 0.002483418 | 0.003839457 |
| smc161.pcaec321               | 0.056992925  | 0.01938666  | 0.003856011 |
| pcaac383.pcaec360             | 0.012659948  | 0.00430762  | 0.003865788 |
| smohc221.smohc161             | -0.084140882 | 0.028649147 | 0.003889582 |
| pcaec380.c181                 | 0.060087395  | 0.020463814 | 0.003897445 |
| alphaaminoadipicacid.pcaec360 | -0.01508195  | 0.005141097 | 0.003929099 |
| serotonin.c0                  | -0.001929343 | 0.000657725 | 0.003932059 |
| pcaac384.pcaec364             | -0.05440785  | 0.018548775 | 0.003933551 |
| c4.transhydroxyproline        | -0.091647057 | 0.031252077 | 0.00394214  |
| alphaaminoadipicacid.pcaec364 | 0.056641315  | 0.019319574 | 0.003950517 |
| pcaec362.pcaac341             | -0.031724212 | 0.010827151 | 0.00397148  |
| c51dc.c5                      | -0.039625078 | 0.013524061 | 0.003972585 |
| smc261.c0                     | -0.000750867 | 0.000256374 | 0.003986692 |
| smc160.pcaec321               | 0.095943233  | 0.032774858 | 0.004004269 |
| pcaec385.smohc222             | 0.00848436   | 0.002898456 | 0.004005991 |
| pcaec386.smohc222             | 0.010320336  | 0.003525739 | 0.004006704 |
| pcaec364.smohc161             | -0.070430511 | 0.024068205 | 0.004017049 |
| methionine.lysopcac181        | 0.076651405  | 0.02619785  | 0.004022178 |
| c18.pcaec360                  | 0.030666403  | 0.010485874 | 0.00403828  |
| serine.pcaec321               | 0.068890172  | 0.023569643 | 0.004059187 |
| pcaec446.smohc161             | -0.034574661 | 0.011830295 | 0.004062645 |
| pcaac322.lysopcac181          | 0.060962299  | 0.020864788 | 0.00407215  |
| pcaac405.pcaec321             | 0.075555116  | 0.025861827 | 0.004075683 |
| c141.pcaec364                 | -0.049175207 | 0.016832623 | 0.004076532 |

|                                   |              |             |             |
|-----------------------------------|--------------|-------------|-------------|
| pcaac322.pcaec443                 | 0.059442413  | 0.020348416 | 0.004078898 |
| pcaec421.pcaec444                 | 0.412373561  | 0.141360312 | 0.00412905  |
| lysopcac203.pcaac386              | 0.046075859  | 0.015795943 | 0.004132016 |
| c4.c0                             | 0.002442058  | 0.000837771 | 0.004156948 |
| pcaec301.pcaec443                 | -0.122939265 | 0.042290518 | 0.004257408 |
| smc261.smohc222                   | 0.006899787  | 0.002374439 | 0.004272248 |
| pcaac364.pcaec321                 | 0.055547204  | 0.01911686  | 0.004274752 |
| lysopcac161.pcaac386              | 0.056795952  | 0.019551068 | 0.004283252 |
| c51.pcaac240                      | -0.041111776 | 0.014158886 | 0.004301351 |
| smc260.c0                         | -0.001495887 | 0.000515815 | 0.004347576 |
| pcaac363.lysopcac181              | 0.061161887  | 0.021114553 | 0.004391841 |
| pcaac381.pcaec360                 | -0.009864124 | 0.003405436 | 0.004393004 |
| smc180.pcaec321                   | -0.091596259 | 0.031652953 | 0.004430252 |
| smohc141.pcaec321                 | 0.125202998  | 0.043270672 | 0.004434007 |
| creatinine.pcaec364               | -0.066926043 | 0.023188007 | 0.004531333 |
| pcaec424.pcaec321                 | 0.061587354  | 0.021342011 | 0.004538143 |
| pcaac420.c181                     | 0.034182239  | 0.011847249 | 0.004544754 |
| lysopcac281.pcaec443              | 0.109345746  | 0.037957632 | 0.004606533 |
| pcaac343.pcaec443                 | 0.057149915  | 0.019847831 | 0.004624847 |
| pcaec401.pcaec422                 | 0.147469671  | 0.05127462  | 0.004671042 |
| prolinr.pcaac386                  | 0.057640882  | 0.020061913 | 0.004711997 |
| lysopcac182.transhydroxyproline   | 0.076612069  | 0.026669633 | 0.004719265 |
| pcaec402.pcaec360                 | -0.015352741 | 0.005348055 | 0.004746335 |
| c10.pcaac341                      | -0.01779775  | 0.006209902 | 0.004813075 |
| pcaac381.pcaac341                 | -0.016602098 | 0.005793648 | 0.004819654 |
| asymmetricdimethylarginine.smohc1 | 0.019094151  | 0.006664505 | 0.004827078 |
| h1.pcaac380                       | -0.088427563 | 0.030865579 | 0.004828903 |
| pcaec422.smohc222                 | 0.018601294  | 0.006497163 | 0.004856827 |
| pcaac425.c181                     | 0.02195192   | 0.007674703 | 0.004895862 |
| pcaec363.smohc222                 | 0.010798867  | 0.003776389 | 0.004906365 |
| c5.pcaac341                       | -0.019285159 | 0.006750485 | 0.004946169 |
| lysopcac204.pcaac341              | -0.01074472  | 0.003762332 | 0.004960713 |
| pcaec420.smohc161                 | -0.034447635 | 0.012070371 | 0.004989764 |
| pcaac364.pcaac386                 | 0.046355539  | 0.016254112 | 0.005019069 |
| pcaac380.c0                       | -0.001013969 | 0.000355649 | 0.00503237  |
| isoleucine.smohc222               | -0.010784632 | 0.003783026 | 0.005035944 |
| asparagine.c181                   | -0.035198288 | 0.012356066 | 0.005067859 |
| serotonin.smohc222                | 0.014427369  | 0.005065535 | 0.005075702 |
| pcaac401.pcaec443                 | 0.12855985   | 0.04515213  | 0.005089003 |
| pcaac422.c5                       | -0.067230106 | 0.023644488 | 0.005147921 |
| pcaac380.smohc222                 | 0.009186383  | 0.003231425 | 0.005156243 |
| leucine.smohc222                  | -0.010901607 | 0.003835191 | 0.005160944 |
| pcaac404.lysopcac181              | 0.126700435  | 0.044575109 | 0.005162722 |
| smohc161.pcaec321                 | -0.10351289  | 0.036427133 | 0.005174358 |
| pcaec383.pcaec321                 | 0.079242507  | 0.027888676 | 0.00517828  |

|                               |              |             |             |
|-------------------------------|--------------|-------------|-------------|
| pcaec363.pcaac341             | -0.047065382 | 0.016576505 | 0.005210607 |
| smohc141.smohc161             | -0.096299901 | 0.033936666 | 0.005236035 |
| pcaac342.pcaac386             | 0.055274826  | 0.01948587  | 0.005251128 |
| pcaec386.smohc161             | -0.101251807 | 0.035698333 | 0.005256477 |
| pcaec421.c181                 | 0.037806147  | 0.013339035 | 0.005288694 |
| pcaac420.c0                   | -0.000971453 | 0.000342987 | 0.005318701 |
| pcaac240.pcaec321             | -0.068471981 | 0.024180039 | 0.005327759 |
| asymmetricdimethylarginine.c0 | 0.005784135  | 0.00204284  | 0.005333067 |
| pcaec341.lysopcac180          | 0.115006509  | 0.04062192  | 0.005337396 |
| pcaec321.pcaec364             | 0.069561256  | 0.024593734 | 0.005380558 |
| pcaac381.smohc222             | 0.021196861  | 0.007495396 | 0.005387381 |
| isoleucine.pcaec360           | 0.020658896  | 0.007305742 | 0.005390918 |
| ornithine.c0                  | 0.003151733  | 0.001115188 | 0.005415954 |
| ornithine.c181                | -0.09549545  | 0.033797183 | 0.005426258 |
| methioninesulfoxide.c0        | -0.009822044 | 0.003477924 | 0.005449218 |
| asparticacid.pcaec404         | -0.073082554 | 0.025890372 | 0.005470797 |
| smc240.smohc161               | -0.085958964 | 0.030459902 | 0.005482614 |
| c142.pcaec381                 | -0.069104158 | 0.024493082 | 0.005493312 |
| pcaac360.c181                 | 0.051961763  | 0.018419257 | 0.005498459 |
| lysopcac280.pcaac386          | -0.037586799 | 0.013339786 | 0.0055539   |
| pcaac363.pcaec322             | -0.109370832 | 0.038856276 | 0.005601335 |
| pcaec363.c0                   | -0.001020025 | 0.000362471 | 0.005612308 |
| glutamicacid.pcaac386         | -0.074081286 | 0.026327691 | 0.005616778 |
| pcaac361.pcaac386             | 0.052368588  | 0.018613746 | 0.00562305  |
| pcaec382.pcaac386             | -0.081244075 | 0.028880539 | 0.005628476 |
| alphaaminoadipicacid.pcaac341 | -0.010690751 | 0.00380066  | 0.005632462 |
| pcaec406.pcaac386             | -0.06088272  | 0.021649125 | 0.005642702 |
| pcaac321.lysopcac180          | 0.110582471  | 0.039325062 | 0.005646654 |
| pcaec343.pcaec342             | -0.348063895 | 0.123858641 | 0.005677233 |
| creatinine.smohc222           | 0.008732618  | 0.00310818  | 0.005687409 |
| pcaac383.pcaac386             | 0.040963902  | 0.014583526 | 0.00569817  |
| creatinine.pcaac341           | -0.046259348 | 0.016475714 | 0.00571804  |
| pcaac322.smc241               | 0.190994622  | 0.068031503 | 0.005722833 |
| pcaac421.smohc161             | -0.032730002 | 0.011666233 | 0.005754988 |
| c162.c0                       | 0.001282954  | 0.000457315 | 0.005757174 |
| pcaec342.smohc222             | 0.013927233  | 0.004965861 | 0.005770821 |
| pcaac362.pcaac386             | 0.063257401  | 0.022559499 | 0.005780481 |
| c101.c0                       | 0.002241352  | 0.00079936  | 0.005782045 |
| pcaec383.pcaec360             | -0.017729811 | 0.006329581 | 0.005830168 |
| asparticacid.pcaec444         | 0.265196701  | 0.094703373 | 0.005844104 |
| pcaac401.smohc161             | -0.049559696 | 0.017706141 | 0.005865974 |
| smc240.pcaec422               | 0.091808809  | 0.032835025 | 0.005916789 |
| pcaac365.c0                   | -0.001353574 | 0.000484171 | 0.005923844 |
| pcaac425.pcaec443             | 0.089907745  | 0.032167982 | 0.005936166 |
| pcaac320.c51dc                | -0.260205935 | 0.093327461 | 0.006056116 |



|                                    |              |             |             |
|------------------------------------|--------------|-------------|-------------|
| lysine.c5                          | 0.045786769  | 0.016443309 | 0.006119572 |
| pcaec404.pcaec443                  | 0.323095924  | 0.116221342 | 0.006200661 |
| pcaac364.pcaec443                  | 0.053019233  | 0.019075368 | 0.006210502 |
| pcaec321.pcaec443                  | 0.054760863  | 0.019714253 | 0.006241876 |
| methioninesulfoxide.transhydroxypr | 0.130373821  | 0.046947609 | 0.006255021 |
| pcaec445.smohc161                  | -0.028132901 | 0.010139932 | 0.006301413 |
| c4.smohc222                        | -0.023274002 | 0.008391361 | 0.00631791  |
| acetylnithoine.c0                  | -0.000854298 | 0.000308267 | 0.006359842 |
| lysopcac140.pcaec322               | -0.101309436 | 0.036570478 | 0.006379071 |
| pcaac362.pcaec443                  | 0.066223399  | 0.023910031 | 0.00638947  |
| lysopcac181.c181                   | -0.061178194 | 0.022116091 | 0.006453991 |
| glutamicacid.pcaec321              | -0.049073206 | 0.017745904 | 0.006470945 |
| smohc241.smc260                    | -0.172652724 | 0.06245332  | 0.006486307 |
| pcaac385.c181                      | 0.022953835  | 0.0083057   | 0.006502952 |
| lysopcac203.pcaec341               | -0.022299778 | 0.008075329 | 0.0065437   |
| creatinine.lysopcac170             | -0.038651708 | 0.014002043 | 0.006563377 |
| arginine.c181                      | -0.037763494 | 0.013683353 | 0.006575189 |
| pcaac321.pcaac341                  | 0.024044219  | 0.00871958  | 0.006619426 |
| pcaac322.pcaec422                  | 0.043366773  | 0.015731589 | 0.006635333 |
| pcaec380.pcaac343                  | 0.105596903  | 0.038309839 | 0.006640656 |
| pcaec343.spermidine                | 0.146090661  | 0.053005006 | 0.006644961 |
| serine.smohc222                    | -0.016442202 | 0.005970145 | 0.006685392 |
| pcaec425.pcaec364                  | 0.026748477  | 0.009713632 | 0.006692463 |
| pcaec401.smohc222                  | 0.016147076  | 0.005864487 | 0.006699037 |
| pcaac380.smohc161                  | -0.045117281 | 0.016400803 | 0.006746587 |
| pcaac363.pcaec403                  | 0.162762881  | 0.059177725 | 0.006756559 |
| spermidine.c181                    | -0.164093135 | 0.059674264 | 0.00676816  |
| pcaec381.smohc161                  | -0.080210918 | 0.02918258  | 0.006792155 |
| pcaec446.pcaec321                  | -0.125889287 | 0.045801993 | 0.006792826 |
| kynurenine.smohc222                | 0.013889663  | 0.005055295 | 0.006812616 |
| pcaec443.pcaec444                  | 0.210782208  | 0.076743625 | 0.006831746 |
| asymmetricdimethylarginine.pcaac40 | 0.128580012  | 0.046840794 | 0.006862034 |
| h1.pcaac341                        | 0.040221718  | 0.014653959 | 0.006867488 |
| pcaac363.pcaec422                  | 0.043355932  | 0.015811295 | 0.006920817 |
| lysopcac280.c181                   | 0.095265061  | 0.034757202 | 0.00694507  |
| pcaac344.pcaec443                  | 0.057092894  | 0.020836789 | 0.006962468 |
| pcaac361.lysopcac180               | 0.161282767  | 0.05886712  | 0.006967038 |
| pcaac300.pcaec443                  | 0.067863192  | 0.024770029 | 0.006967977 |
| pcaac321.pcaec360                  | 0.014371178  | 0.005245843 | 0.006971868 |
| pcaec342.spermidine                | 0.143327581  | 0.052372559 | 0.007029209 |
| glutamicacid.pcaec360              | -0.015426025 | 0.005641751 | 0.007078556 |
| pcaac300.pcaac341                  | 0.0235425    | 0.00862167  | 0.00715309  |
| pcaac364.c51dc                     | -0.227758059 | 0.083439565 | 0.007173729 |
| pcaac360.smohc222                  | 0.016528986  | 0.006055757 | 0.007176833 |
| pcaac342.spermidine                | 0.139911343  | 0.051317162 | 0.007240234 |

|                            |              |             |             |
|----------------------------|--------------|-------------|-------------|
| smc260.pcaec381            | -0.043835005 | 0.016086482 | 0.007270341 |
| acetylmithoine.c181        | 0.022035906  | 0.008095955 | 0.007335659 |
| lysopcac203.glycine        | -0.164346807 | 0.060414565 | 0.00736778  |
| pcaac402.smohc161          | -0.053862784 | 0.019824924 | 0.007439802 |
| smohc241.c141oh            | 0.227244441  | 0.083674073 | 0.007463146 |
| phenylalanine.pcaec404     | -0.05633397  | 0.020746894 | 0.007474523 |
| lysopcac140.c162           | -0.181234632 | 0.066764668 | 0.007490961 |
| serine.pcaec443            | -0.124852565 | 0.046003584 | 0.007502855 |
| pcaac384.c0                | -0.002347835 | 0.000866756 | 0.007615558 |
| pcaec341.smc261            | 0.095339512  | 0.035217517 | 0.007650439 |
| pcaec406.c181              | 0.033066012  | 0.012224281 | 0.007699011 |
| lysopcac182.smohc222       | 0.008531524  | 0.003157795 | 0.007769883 |
| pcaac403.pcaec444          | 0.298123582  | 0.110399405 | 0.0077993   |
| c14.pcaec360               | 0.012086975  | 0.004476231 | 0.007802676 |
| lysopcac161.pcaac425       | -0.167973515 | 0.062254372 | 0.007849014 |
| c141.pcaec381              | -0.091011913 | 0.033732156 | 0.007851352 |
| pcaac343.c0                | -0.002765566 | 0.001025111 | 0.007857033 |
| pcaec444.smohc161          | -0.022579165 | 0.008370488 | 0.007864848 |
| citruine.pcaac425          | -0.147932393 | 0.054850024 | 0.007874685 |
| glutamine.pcaac386         | 0.045131404  | 0.016743174 | 0.00790893  |
| pcaec401.c0                | -0.002236645 | 0.000829956 | 0.007922769 |
| pcaac420.smohc222          | 0.008739888  | 0.003247306 | 0.008001382 |
| pcaec365.smc180            | -0.074149596 | 0.02756911  | 0.008043301 |
| pcaec321.lysopcac180       | 0.13613488   | 0.050649411 | 0.008084599 |
| c3.c181                    | 0.02726251   | 0.010148413 | 0.008116967 |
| citruine.pcaec364          | -0.071619995 | 0.026683258 | 0.008170196 |
| pcaac381.pcaec321          | -0.056739496 | 0.02114021  | 0.008172957 |
| pcaec386.c0                | -0.000897472 | 0.000334464 | 0.008187953 |
| glutamine.pcaac341         | 0.00697113   | 0.002599379 | 0.00822219  |
| pcaec380.pcaec321          | 0.043435551  | 0.016206078 | 0.008260604 |
| glycine.smohc222           | 0.011667036  | 0.004353136 | 0.008261924 |
| serine.transhydroxyproline | 0.104824679  | 0.039123654 | 0.008281339 |
| pcaec365.smohc222          | 0.011312384  | 0.004223524 | 0.008302349 |
| pcaac322.pcaec403          | 0.201202057  | 0.075120292 | 0.008302941 |
| smohc241.c181              | 0.03030262   | 0.011330218 | 0.008395245 |
| pcaac364.c0                | -0.001318812 | 0.000493243 | 0.008412807 |
| pcaac361.c141              | -0.064600853 | 0.02418265  | 0.008469798 |
| pcaac341.c141              | -0.08112697  | 0.030389288 | 0.00851257  |
| pcaec385.pcaac341          | -0.013827431 | 0.005180988 | 0.008529718 |
| pcaac344.c0                | -0.001747083 | 0.000654899 | 0.008557907 |
| pcaac360.pcaac365          | 0.183979028  | 0.069055017 | 0.008642298 |
| c51dc.pcaec364             | -0.033892602 | 0.01275049  | 0.008792248 |
| pcaac322.c141              | -0.08638226  | 0.03249747  | 0.008792707 |
| pcaec420.pcaec360          | -0.010257461 | 0.003860305 | 0.008816508 |
| pcaec363.pcaec422          | 0.068785677  | 0.025899385 | 0.008848435 |

|                               |              |             |             |
|-------------------------------|--------------|-------------|-------------|
| pcaac281.pcaec443             | 0.104697324  | 0.039444344 | 0.008887789 |
| pcaac426.c5                   | -0.026904332 | 0.010141475 | 0.008922985 |
| pcaac421.c181                 | 0.025414706  | 0.009583517 | 0.008947705 |
| citruiline.c2                 | 0.063108705  | 0.023797648 | 0.008948462 |
| leucine.c5                    | 0.042308795  | 0.015980084 | 0.009057159 |
| pcaac361.pcaec364             | -0.052044974 | 0.019659695 | 0.009064859 |
| pcaec421.pcaec321             | 0.082792748  | 0.031298663 | 0.009117077 |
| methionine.pcaec443           | -0.088863815 | 0.033603268 | 0.009136292 |
| pcaac421.pcaac365             | 0.167622603  | 0.063388886 | 0.009140038 |
| lysopcac160.c181              | 0.074111655  | 0.028033358 | 0.009156941 |
| c101.pcaec364                 | -0.043693985 | 0.016545956 | 0.009232556 |
| pcaec446.c2                   | 0.073672975  | 0.027922119 | 0.009290965 |
| c102.c5                       | -0.021516701 | 0.008155121 | 0.009293271 |
| pcaec364.smohc222             | 0.012643153  | 0.004792684 | 0.009304147 |
| c14.pcaec364                  | -0.026911757 | 0.010202363 | 0.009309742 |
| pcaac300.pcaac386             | 0.043590638  | 0.016529257 | 0.009325822 |
| histidine.c0                  | 0.00227133   | 0.000861819 | 0.009369668 |
| lysopcac140.pcaec360          | 0.010662937  | 0.004047843 | 0.009403324 |
| c0.lysopcac170                | 0.049125269  | 0.018653267 | 0.009419807 |
| smc240.c5                     | -0.044714958 | 0.016985195 | 0.009446665 |
| alanine.lysopcac181           | 0.058900459  | 0.022381859 | 0.009472304 |
| lysopcac204.smohc222          | 0.007098605  | 0.002699672 | 0.009530353 |
| kynurenine.pcaac386           | 0.065132139  | 0.024790076 | 0.009586072 |
| glutamine.transhydroxyproline | 0.07257211   | 0.027631744 | 0.009611391 |
| lysopcac203.pcaec360          | 0.012601767  | 0.004802049 | 0.009669447 |
| pcaac366.pcaec443             | 0.128974242  | 0.049198245 | 0.009743334 |
| pcaec425.c0                   | -0.001476589 | 0.000564004 | 0.009838206 |
| lysopcac203.c162              | -0.181834142 | 0.069502896 | 0.00988873  |
| pcaec402.smohc161             | -0.035519732 | 0.013594305 | 0.009982003 |
| kynurenine.c181               | 0.02343322   | 0.008968681 | 0.009983554 |
| pcaec321.c141                 | -0.056787265 | 0.021734565 | 0.009984122 |
| pcaac421.c0                   | -0.001031777 | 0.00039501  | 0.010004541 |
| alphaaminoadipicacid.c181     | 0.057678493  | 0.022089355 | 0.010029202 |
| isoleucine.pcaec322           | 0.261591454  | 0.100189546 | 0.01003419  |
| c3.pcaac386                   | 0.060089079  | 0.023024263 | 0.010066347 |
| putrescine.c0                 | -0.002415659 | 0.000925791 | 0.010081013 |
| kynurenine.smohc161           | -0.047633833 | 0.018272745 | 0.010150426 |
| pcaac384.smohc222             | 0.01341778   | 0.005151129 | 0.010207021 |
| c3.pcaac341                   | -0.009713426 | 0.003729416 | 0.01021495  |
| c16.pcaac386                  | 0.058170674  | 0.022348786 | 0.010262928 |
| pcaec384.c141oh               | 0.227267211  | 0.087321015 | 0.01026842  |
| pcaec422.pcaec444             | 0.248163617  | 0.095352348 | 0.010270349 |
| asparticacid.pcaac386         | -0.046347627 | 0.017816983 | 0.010306858 |
| lysopcac182.pcaac402          | 0.058032892  | 0.022326876 | 0.010366451 |
| c18.pcaec321                  | -0.056214861 | 0.021657322 | 0.010470066 |

|                        |              |             |             |
|------------------------|--------------|-------------|-------------|
| pcaec420.pcaac341      | -0.01215532  | 0.004683006 | 0.010470888 |
| pcaec386.c181          | 0.033348366  | 0.012849713 | 0.010481387 |
| asparagine.lysopcac170 | -0.036709402 | 0.01414541  | 0.010484748 |
| c51dc.pcaac341         | 0.01647601   | 0.006349352 | 0.010491543 |
| c8.pcaec364            | -0.044595699 | 0.017189814 | 0.010509066 |
| creatinine.pcaac402    | 0.048497309  | 0.018695365 | 0.010515689 |
| c12.c8                 | 0.118163564  | 0.045565517 | 0.01053944  |
| glutamine.smohc161     | 0.017161096  | 0.006617563 | 0.010539498 |
| smohc221.pcaec443      | 0.13358411   | 0.051579715 | 0.010639374 |
| isoleucine.c0          | 0.001246017  | 0.000481785 | 0.010745984 |
| pcaac342.lysopcac181   | 0.05504068   | 0.021332212 | 0.010928024 |
| pcaac402.pcaec444      | 0.309886846  | 0.12013405  | 0.010947898 |
| h1.pcaec364            | -0.039744927 | 0.015427051 | 0.011044758 |
| pcaac421.pcaec364      | 0.020976025  | 0.008143896 | 0.011064241 |
| pcaac422.pcaec444      | 0.24623581   | 0.095624695 | 0.011084109 |
| pcaac386.spermidine    | 0.133126578  | 0.051739243 | 0.01114515  |
| pcaec424.c181          | 0.023874079  | 0.009279032 | 0.011148918 |
| pcaac343.spermidine    | 0.132937127  | 0.051688787 | 0.011180597 |
| pcaac384.pcaac386      | 0.037887196  | 0.014736935 | 0.011210635 |
| acetylmornithoine.c141 | -0.076285428 | 0.029673005 | 0.011211591 |
| c12.pcaec364           | -0.040123973 | 0.015612064 | 0.011236533 |
| pcaac344.spermidine    | 0.136922139  | 0.053322843 | 0.011306798 |
| pcaac342.pcaec422      | 0.045903247  | 0.017882903 | 0.011335314 |
| smc261.c2              | 0.071422467  | 0.027825121 | 0.011336712 |
| pcaac422.c181          | 0.056708498  | 0.022120319 | 0.011436679 |
| pcaac422.pcaac402      | 0.186502797  | 0.072781966 | 0.011472908 |
| pcaec404.c5            | -0.0706655   | 0.027613192 | 0.01157934  |
| pcaec406.c0            | -0.001553131 | 0.000607005 | 0.011593415 |
| c2.c181                | 0.040249502  | 0.015730986 | 0.011595489 |
| c51.c141               | -0.036372995 | 0.01421641  | 0.011598382 |
| pcaec322.c181          | 0.022071689  | 0.008631484 | 0.01164323  |
| pcaec363.lysopcac181   | 0.077249584  | 0.030211265 | 0.011647527 |
| pcaac360.lysopcac160   | 0.184596634  | 0.07220427  | 0.011660002 |
| pcaec446.pcaec342      | -0.182961526 | 0.071612939 | 0.011715146 |
| arginine.pcaec443      | -0.134724338 | 0.05275164  | 0.011745036 |
| pcaec384.smc160        | 0.253658687  | 0.099422323 | 0.011829292 |
| pcaac426.c0            | -0.004603082 | 0.001804638 | 0.011849676 |
| serine.pcaac386        | -0.051041923 | 0.020039745 | 0.01196892  |
| pcaac405.pcaec360      | 0.005831749  | 0.002289947 | 0.011980694 |
| pcaec424.pcaec443      | 0.105152108  | 0.04129007  | 0.011980909 |
| pcaec384.c0            | -0.001402433 | 0.000550878 | 0.012008894 |
| pcaac341.pcaec360      | 0.010667945  | 0.004193037 | 0.012061812 |
| pcaac383.pcaec404      | -0.076567115 | 0.030096303 | 0.012066237 |
| pcaec361.c5            | -0.039983781 | 0.015727576 | 0.01212562  |
| pcaec444.pcaec443      | 0.060126818  | 0.023655438 | 0.012142063 |

|                               |              |             |             |
|-------------------------------|--------------|-------------|-------------|
| pcaec364.c51dc                | -0.209793133 | 0.082585783 | 0.012190864 |
| pcaec343.c141                 | -0.067505324 | 0.026587285 | 0.012234095 |
| c2.pcaec300                   | 0.05963171   | 0.023490275 | 0.012248704 |
| pcaac364.lysopcac181          | 0.095783682  | 0.037736245 | 0.012259703 |
| c142.pcaec364                 | -0.053941542 | 0.021263174 | 0.012306178 |
| pcaec343.smohc222             | 0.009877581  | 0.003895007 | 0.012336155 |
| c101.pcaec443                 | 0.133447434  | 0.052654923 | 0.012389458 |
| smc160.smohc222               | 0.011641512  | 0.004596002 | 0.012437197 |
| lysopcac203.pcaac402          | 0.10807072   | 0.042675295 | 0.012456485 |
| lysopcac161.smohc161          | -0.048936208 | 0.019332116 | 0.012492226 |
| c141oh.c181                   | -0.077644504 | 0.03068203  | 0.012516871 |
| pcaec321.spermidine           | 0.12841034   | 0.050755225 | 0.01253819  |
| alphaaminoadipicacid.pcaec322 | 0.116313796  | 0.046000585 | 0.012588203 |
| pcaac344.pcaec360             | 0.010298877  | 0.004078797 | 0.012710218 |
| serotonin.c2                  | 0.150603462  | 0.059698967 | 0.012788598 |
| glutamicacid.c181             | -0.050749614 | 0.020139511 | 0.012886531 |
| creatinine.pcaac425           | -0.1533169   | 0.060863601 | 0.012917269 |
| pcaec385.smohc161             | -0.08397045  | 0.033337934 | 0.012926329 |
| lysopcac281.c181              | 0.020251467  | 0.008044694 | 0.012975348 |
| pcaec363.pcaac402             | 0.081032098  | 0.032195558 | 0.012992854 |
| c141.pcaec360                 | 0.017192275  | 0.006835341 | 0.013051714 |
| pcaec360.pcaec443             | 0.087548074  | 0.034811709 | 0.013062341 |
| smc240.lysopcac181            | 0.074549121  | 0.029645047 | 0.013068666 |
| pcaac405.c2                   | -0.151852038 | 0.060407047 | 0.013100944 |
| c18.smohc222                  | 0.020809798  | 0.008278396 | 0.013103278 |
| pcaec301.pcaec364             | 0.033758578  | 0.013444741 | 0.013204172 |
| pcaac362.smc261               | 0.080910298  | 0.03222871  | 0.013218802 |
| c18.lysopcac170               | 0.126413035  | 0.050394416 | 0.013291587 |
| pcaac341.glycine              | 0.103216548  | 0.041157374 | 0.013313968 |
| c141oh.c0                     | 0.003239683  | 0.001291851 | 0.013316412 |
| methionine.pcaac386           | 0.040080766  | 0.015984967 | 0.013330057 |
| pcaec342.c141                 | -0.058544094 | 0.023349584 | 0.013334287 |
| pcaac421.c5                   | -0.029910346 | 0.011938674 | 0.013404863 |
| pcaec363.c141                 | -0.046693247 | 0.018639698 | 0.013415339 |
| pcaac403.c181                 | 0.03372539   | 0.013464869 | 0.013427956 |
| c141oh.pcaac386               | 0.053393993  | 0.021318907 | 0.013433681 |
| smc202.pcaac402               | 0.10110723   | 0.040378816 | 0.013454369 |
| c51.smohc161                  | -0.014746923 | 0.005890429 | 0.01346991  |
| serotonin.pcaac341            | -0.007942391 | 0.003175144 | 0.013546909 |
| c51.c0                        | -0.001161573 | 0.000464529 | 0.013579377 |
| c10.pcaec381                  | -0.074999758 | 0.030000462 | 0.01360087  |
| pcaac420.pcaec321             | -0.06830473  | 0.027327787 | 0.01361895  |
| glycine.transhydroxyproline   | 0.04969127   | 0.019933907 | 0.013865455 |
| pcaec385.c181                 | 0.022699114  | 0.009107994 | 0.013887197 |
| glycine.c181                  | -0.053117932 | 0.021315001 | 0.013893716 |

|                        |              |             |             |
|------------------------|--------------|-------------|-------------|
| pcaac406.pcaec321      | 0.056822813  | 0.022804707 | 0.01390607  |
| pcaac363.pcaac343      | -0.079122118 | 0.031872016 | 0.014254807 |
| pcaac383.c0            | 0.002192789  | 0.000883612 | 0.014288346 |
| smc202.pcaec321        | 0.082397972  | 0.033205187 | 0.014293709 |
| histidine.lysopcac170  | -0.036164272 | 0.014574073 | 0.014296298 |
| pcaac384.c181          | 0.01745194   | 0.007042479 | 0.014423937 |
| c102.smohc222          | 0.025715207  | 0.010383061 | 0.014479926 |
| pcaec423.c0            | -0.001588481 | 0.000641675 | 0.014523728 |
| phenylalanine.pcaac386 | 0.06565599   | 0.026533402 | 0.014564864 |
| glutamine.c0           | -0.001057159 | 0.000427525 | 0.014632134 |
| pcaac421.c2            | 0.097937691  | 0.039648264 | 0.014733455 |
| c12.pcaac341           | -0.022708409 | 0.009193152 | 0.014734226 |
| pcaec341.c141          | -0.051472581 | 0.020846482 | 0.014774386 |
| arginine.smohc221      | 0.141440148  | 0.057331683 | 0.014856532 |
| pcaac403.smohc161      | -0.032019662 | 0.012984523 | 0.014898789 |
| smc160.smohc161        | -0.162014125 | 0.065758851 | 0.01498755  |
| lysopcac203.pcaec322   | -0.146077972 | 0.059291347 | 0.014988743 |
| pcaec445.c181          | 0.027606481  | 0.011213468 | 0.015062011 |
| pcaec340.smc261        | 0.142512042  | 0.057898032 | 0.015080993 |
| pcaac385.pcaec321      | 0.076245175  | 0.031010967 | 0.015193146 |
| pcaac421.smohc222      | 0.00885459   | 0.003604702 | 0.015284557 |
| pcaac381.arginine      | -0.138171586 | 0.056259757 | 0.01530256  |
| pcaec401.pcaec300      | -0.044313383 | 0.018051623 | 0.015349208 |
| c2.transhydroxyproline | -0.077876466 | 0.031750444 | 0.015433013 |
| lysopcac203.pcaec403   | 0.127015886  | 0.051856907 | 0.015573746 |
| pcaec424.smohc222      | 0.022811043  | 0.00931764  | 0.015623335 |
| pcaac401.smohc222      | 0.051859761  | 0.021203489 | 0.015720882 |
| pcaac366.pcaec360      | -0.01123328  | 0.004594324 | 0.015753389 |
| pcaec343.c5            | -0.036755266 | 0.01503531  | 0.01577171  |
| smc260.smohc222        | 0.011495747  | 0.004704268 | 0.015809911 |
| pcaec380.pcaec443      | 0.190402982  | 0.0779995   | 0.015919506 |
| pcaec385.c141          | -0.0737015   | 0.03020464  | 0.015962067 |
| smc260.pcaec360        | -0.018571335 | 0.00761624  | 0.016033521 |
| pcaac322.pcaec364      | -0.026346348 | 0.010825729 | 0.016234545 |
| c14.pcaec380           | -0.088548832 | 0.036388748 | 0.016245985 |
| pcaec423.smohc161      | -0.019503561 | 0.008017839 | 0.016284335 |
| pcaec365.c181          | 0.022507494  | 0.009255741 | 0.016318274 |
| pcaec401.lysopcac181   | 0.111361702  | 0.045864801 | 0.01647816  |
| c12.pcaec381           | -0.076539376 | 0.031543427 | 0.016546454 |
| pcaec423.pcaec360      | -0.007957495 | 0.003280168 | 0.016569827 |
| citruiline.pcaec361    | -0.020393363 | 0.008413742 | 0.016662984 |
| c16.pcaec364           | -0.054266296 | 0.022391411 | 0.01667549  |
| smohc241.c2            | 0.098903894  | 0.040850607 | 0.0167822   |
| pcaac381.pcaec322      | 0.143476793  | 0.059265358 | 0.016790614 |
| kynurenine.pcaac341    | -0.017783189 | 0.007348477 | 0.016832197 |

|                                |              |             |             |
|--------------------------------|--------------|-------------|-------------|
| pcaac360.smohc161              | -0.047950822 | 0.019852588 | 0.017039024 |
| c142.pcaac402                  | 0.038339652  | 0.015875084 | 0.017050689 |
| c141oh.pcaec364                | -0.032113301 | 0.013297278 | 0.017053172 |
| pcaac320.smohc161              | -0.071028925 | 0.029422043 | 0.017093064 |
| pcaac422.pcaec300              | -0.055764901 | 0.023115902 | 0.017171228 |
| c142.c0                        | 0.001636569  | 0.000678418 | 0.01717453  |
| pcaac342.c5                    | -0.023046448 | 0.009560278 | 0.017250743 |
| pcaec424.smohc161              | -0.02675639  | 0.01110422  | 0.017299592 |
| h1.pcaac386                    | 0.03936721   | 0.016339756 | 0.017312301 |
| c51.pcaec321                   | -0.045147428 | 0.018771939 | 0.017506064 |
| smohc161.pcaac425              | 0.125245526  | 0.052078448 | 0.017511071 |
| c3.c0                          | 0.001726445  | 0.000717906 | 0.017515889 |
| pcaac343.c141                  | -0.078944929 | 0.03283931  | 0.017555356 |
| asparagine.transhydroxyproline | 0.046177465  | 0.019215044 | 0.017591433 |
| lysopcac161.pcaac406           | 0.109173985  | 0.045430256 | 0.017595192 |
| c102.smc181                    | -0.049242204 | 0.020497374 | 0.017629595 |
| pcaec403.smohc222              | -0.027712944 | 0.011537396 | 0.01764606  |
| pcaac420.pcaac365              | 0.123966731  | 0.051639585 | 0.017710706 |
| pcaec420.pcaec443              | 0.058428603  | 0.024342589 | 0.017727038 |
| methionine.c18                 | 0.099320113  | 0.041384474 | 0.017742171 |
| pcaec403.smohc161              | -0.051402296 | 0.021422852 | 0.017766452 |
| pcaec384.c181                  | 0.019185325  | 0.007997194 | 0.01778541  |
| pcaec423.pcaec443              | 0.091261553  | 0.038048024 | 0.017804901 |
| kynurenine.pcaac323            | -0.270153219 | 0.112666345 | 0.017840913 |
| smc160.pcaac341                | -0.017037105 | 0.007114308 | 0.017983823 |
| pcaac281.pcaec364              | -0.044399494 | 0.01854404  | 0.018007035 |
| pcaac381.pcaac365              | 0.097252539  | 0.040653941 | 0.018104642 |
| pcaac342.c141                  | -0.062831439 | 0.026286252 | 0.018195988 |
| c181.pcaac341                  | -0.010701678 | 0.004482361 | 0.018327937 |
| pcaec364.c0                    | -0.000934628 | 0.000391573 | 0.018359259 |
| pcaac344.c51dc                 | -0.214180675 | 0.089758164 | 0.018390768 |
| pcaac420.c2                    | 0.078294209  | 0.032826491 | 0.018443828 |
| pcaac320.pcaac240              | -0.052470285 | 0.02200776  | 0.018488123 |
| pcaac383.lysopcac161           | 0.133461481  | 0.055995571 | 0.018523945 |
| c102.pcaec360                  | -0.013732601 | 0.005764014 | 0.018570211 |
| c162.c8                        | 0.128185769  | 0.053859686 | 0.018690378 |
| pcaec446.spermidine            | 0.121223815  | 0.050952186 | 0.018730634 |
| pcaac384.pcaec443              | 0.075794845  | 0.031868121 | 0.018768557 |
| pcaec362.c141oh                | 0.177835145  | 0.07480452  | 0.018820345 |
| lysopcac182.pcaec404           | 0.031624427  | 0.013321842 | 0.018990077 |
| kynurenine.pcaec443            | 0.087972394  | 0.037064    | 0.01900741  |
| pcaec402.c181                  | 0.040469183  | 0.017051826 | 0.019018361 |
| lysopcac182.c14                | 0.091407838  | 0.038521486 | 0.019038118 |
| leucine.c0                     | 0.001063329  | 0.000448399 | 0.019113119 |
| pcaec385.pcaec361              | -0.019278204 | 0.008130364 | 0.019125752 |

|                               |              |             |             |
|-------------------------------|--------------|-------------|-------------|
| pcaec404.smohc161             | -0.038383417 | 0.016188613 | 0.019131881 |
| smc260.pcaac341               | -0.095305574 | 0.040219956 | 0.019201735 |
| pcaac362.pcaec403             | 0.117572767  | 0.049697146 | 0.019393107 |
| pcaec322.pcaec443             | 0.088893521  | 0.037600078 | 0.019473708 |
| pcaac361.pcaac365             | -0.065725473 | 0.027808428 | 0.019507805 |
| pcaac420.pcaec364             | 0.027124547  | 0.011479922 | 0.019544601 |
| kynurenine.smc160             | -0.137107865 | 0.058029449 | 0.019547257 |
| lysopcac280.c141oh            | 0.173797807  | 0.073567262 | 0.019562193 |
| pcaec382.pcaec360             | -0.015095761 | 0.006390852 | 0.019579684 |
| pcaac384.pcaec360             | 0.008772388  | 0.00371476  | 0.019609812 |
| pcaac404.c0                   | 0.002947687  | 0.001248712 | 0.019656169 |
| lysopcac182.c2                | 0.102049714  | 0.043268931 | 0.019762429 |
| pcaec425.smohc161             | -0.024304612 | 0.010314265 | 0.019869554 |
| pcaec405.pcaec364             | 0.016845057  | 0.007154035 | 0.01996138  |
| pcaec423.smohc222             | 0.011544384  | 0.004903661 | 0.019981263 |
| lysopcac182.pcaec322          | -0.137279043 | 0.058316572 | 0.019991909 |
| pcaac323.pcaac402             | 0.074281762  | 0.031561564 | 0.020016711 |
| smc240.pcaec443               | 0.089631073  | 0.038093368 | 0.02004879  |
| lysopcac170.pcaec360          | -0.01125836  | 0.004788044 | 0.020130865 |
| c5l.transhydroxyproline       | -0.114172666 | 0.048576942 | 0.020182951 |
| asparagine.c8                 | -0.105537648 | 0.0449349   | 0.02026997  |
| pcaec340.pcaec321             | 0.133470432  | 0.056845951 | 0.020309032 |
| phenylalanine.smohc161        | -0.022169059 | 0.009454269 | 0.020469756 |
| smohc161.pcaec363             | -0.087537031 | 0.037334302 | 0.020479866 |
| pcaec363.pcaac384             | -0.114381952 | 0.048815682 | 0.020561315 |
| pcaac365.pcaec321             | 0.079905924  | 0.034125176 | 0.020645411 |
| smc180.pcaec443               | 0.127034863  | 0.054265771 | 0.02067611  |
| c141oh.pcaac341               | -0.012385862 | 0.005295678 | 0.020788804 |
| alphaaminoadipicacid.pcaac425 | 0.116504237  | 0.049829814 | 0.020832636 |
| smohc161.c141oh               | 0.163986889  | 0.070162476 | 0.020875395 |
| smc160.c141oh                 | 0.164129539  | 0.070234487 | 0.020894999 |
| pcaac361.pcaec360             | 0.006132515  | 0.002624722 | 0.020918429 |
| pcaac386.lysopcac180          | 0.08768999   | 0.037615053 | 0.021199296 |
| pcaac406.spermidine           | 0.121399481  | 0.052135047 | 0.021345962 |
| c16.pcaec444                  | -0.184207875 | 0.079187165 | 0.021473425 |
| glutamicacid.c0               | 0.001473459  | 0.000633567 | 0.021505128 |
| pcaec321.c0                   | -0.000639191 | 0.00027485  | 0.021508246 |
| pcaec365.c0                   | -0.00077589  | 0.000333868 | 0.021599907 |
| serine.spermidine             | -0.121490847 | 0.052299384 | 0.021652573 |
| pcaac404.c2                   | -0.127615652 | 0.054982492 | 0.021761644 |
| lysopcac140.pcaac365          | -0.097291909 | 0.041933327 | 0.021809889 |
| pcaec385.c2                   | 0.068993431  | 0.029752754 | 0.021880503 |
| c162.c181                     | 0.028503945  | 0.012311442 | 0.022085519 |
| pcaec342.c141oh               | 0.205975099  | 0.088990422 | 0.022122982 |
| pcaec406.pcaac365             | 0.10112361   | 0.043692478 | 0.022130677 |



|                                    |              |             |             |
|------------------------------------|--------------|-------------|-------------|
| pcaac383.lysopcac181               | 0.052426875  | 0.022652397 | 0.022132502 |
| c51dc.pcaac386                     | 0.028963815  | 0.012514583 | 0.022132638 |
| pcaac383.pcaec300                  | -0.066364466 | 0.02867684  | 0.022143193 |
| smohc241.c0                        | -0.000790142 | 0.000341784 | 0.02227931  |
| c141oh.pcaec444                    | -0.150342385 | 0.065046533 | 0.02230831  |
| alphaaminoadipicacid.phenylalanine | 0.128167916  | 0.05545849  | 0.022322233 |
| pcaec342.c0                        | -0.000884783 | 0.000383263 | 0.022465346 |
| pcaac380.c2                        | 0.077681677  | 0.03372703  | 0.02277071  |
| pcaac364.smohc161                  | -0.093039469 | 0.040395036 | 0.022771102 |
| glutamine.pcaac402                 | 0.177723886  | 0.07717315  | 0.022789424 |
| serine.smohc161                    | -0.026335872 | 0.011436878 | 0.022801525 |
| pcaac344.pcaec422                  | 0.039745632  | 0.017262253 | 0.022816363 |
| pcaec343.c0                        | -0.000699394 | 0.000303875 | 0.022867192 |
| pcaec420.c5                        | -0.030529717 | 0.013267251 | 0.022893366 |
| pcaac385.pcaac323                  | -0.223669505 | 0.097253951 | 0.02296814  |
| pcaec386.lysopcac180               | 0.131914915  | 0.057408935 | 0.023087339 |
| pcaec422.c0                        | -0.001201839 | 0.000523084 | 0.023099512 |
| pcaac406.pcaac386                  | 0.20154927   | 0.087864391 | 0.023319511 |
| pcaac383.pcaac365                  | -0.063610057 | 0.027731296 | 0.023323481 |
| smc160.pcaec364                    | 0.050135677  | 0.021859941 | 0.023341514 |
| pcaec383.smohc222                  | -0.018485708 | 0.008060716 | 0.023352574 |
| pcaec360.c141                      | -0.077733071 | 0.033921097 | 0.023454817 |
| pcaec365.pcaec361                  | -0.022361259 | 0.009763009 | 0.023524939 |
| pcaec446.pcaec361                  | -0.019472425 | 0.008502282 | 0.023533737 |
| methioninesulfoxide.pcaac402       | 0.27244734   | 0.118987964 | 0.023566757 |
| pcaac320.c0                        | -0.000662793 | 0.000289468 | 0.023567356 |
| lysopcac204.c2                     | 0.088805923  | 0.038819928 | 0.023690419 |
| pcaec444.c141oh                    | 0.149244456  | 0.065264574 | 0.023743039 |
| lysopcac140.transhydroxyproline    | 0.096444626  | 0.042176164 | 0.023746123 |
| leucine.pcaec360                   | 0.016967253  | 0.007423154 | 0.02380561  |
| pcaac362.pcaac341                  | -0.037112515 | 0.016237865 | 0.023815622 |
| c18.c0                             | -0.001547442 | 0.000677174 | 0.023840119 |
| methionine.pcaec445                | 0.121355634  | 0.053111584 | 0.023853919 |
| smc161.smc261                      | 0.129337818  | 0.056608508 | 0.023862447 |
| c141.pcaac402                      | 0.033585146  | 0.014704207 | 0.023906336 |
| pcaec321.c51dc                     | -0.211652724 | 0.092697479 | 0.023953942 |
| pcaec341.spermidine                | 0.118669638  | 0.051980207 | 0.023971236 |
| smc260.c2                          | 0.115612498  | 0.05064207  | 0.023973871 |
| pcaac366.pcaac343                  | 0.093451845  | 0.040943334 | 0.024002114 |
| pcaac420.pcaec361                  | -0.041641414 | 0.018244567 | 0.02400618  |
| pcaec443.smohc161                  | -0.032546186 | 0.014263872 | 0.024047399 |
| c14.pcaec444                       | -0.201022197 | 0.0881166   | 0.024071787 |
| pcaec365.pcaec321                  | -0.088120453 | 0.038704406 | 0.024350738 |
| pcaec382.pcaec300                  | -0.032778589 | 0.014397279 | 0.024352825 |
| pcaec423.pcaec444                  | 0.245388127  | 0.107787923 | 0.024361324 |

|                                 |              |             |             |
|---------------------------------|--------------|-------------|-------------|
| lysopcac280.transhydroxyproline | -0.133227525 | 0.058522967 | 0.024366417 |
| pcaec403.pcaec444               | 0.261656571  | 0.11499039  | 0.024430097 |
| pcaac300.c141                   | -0.06721594  | 0.029543048 | 0.024447242 |
| pcaac404.pcaec404               | -0.062434021 | 0.027443566 | 0.024458934 |
| pcaec443.pcaec364               | 0.014791906  | 0.006503786 | 0.024498644 |
| pcaac364.smohc222               | 0.010333765  | 0.004544542 | 0.024527555 |
| pcaec361.smc261                 | 0.115706434  | 0.050894968 | 0.024555339 |
| pcaec382.smohc161               | -0.04678333  | 0.020581406 | 0.024576901 |
| pcaec385.c51dc                  | -0.211153114 | 0.092932068 | 0.024636644 |
| pcaac361.pcaec403               | 0.118474304  | 0.052148823 | 0.024653602 |
| c12.glycine                     | -0.051025662 | 0.022461103 | 0.024660776 |
| c141.pcaec444                   | -0.244196178 | 0.107508727 | 0.024681058 |
| smc240.smc202                   | -0.084640868 | 0.037274104 | 0.024720811 |
| pcaac344.lysopcac180            | 0.102141177  | 0.044981041 | 0.024721313 |
| pcaac363.asparagine             | 0.088134311  | 0.038826662 | 0.024772236 |
| pcaec384.lysopcac180            | 0.11471004   | 0.050645808 | 0.025085453 |
| pcaac320.pcaec321               | 0.066015178  | 0.02915617  | 0.025133022 |
| smc202.pcaec443                 | -0.135079892 | 0.059664664 | 0.025146127 |
| pcaec322.c141                   | -0.060950244 | 0.026921959 | 0.02514768  |
| ornithine.smohc161              | 0.020722671  | 0.009155897 | 0.02518852  |
| pcaec381.pcaec444               | 0.225562211  | 0.099766484 | 0.025341533 |
| pcaec365.c51dc                  | -0.208878475 | 0.092399423 | 0.025360489 |
| pcaac362.spermidine             | 0.121075437  | 0.053587185 | 0.02543653  |
| pcaec321.transhydroxyproline    | -0.056527425 | 0.025035183 | 0.025531812 |
| smohc141.c141oh                 | 0.165140612  | 0.073155703 | 0.025566013 |
| c4.c5                           | -0.031161401 | 0.013810134 | 0.025628228 |
| pcaec364.c181                   | 0.021074713  | 0.009350826 | 0.02579793  |
| lysopcac203.lysopcac170         | -0.062012133 | 0.027519033 | 0.025820791 |
| pcaac421.pcaec321               | -0.071163129 | 0.031613734 | 0.025976836 |
| c0.pcaec322                     | 0.133441125  | 0.059285502 | 0.025989655 |
| smc241.c0                       | -0.000803666 | 0.000357107 | 0.026011043 |
| pcaec445.transhydroxyproline    | -0.070952306 | 0.031530141 | 0.026023566 |
| pcaec342.pcaac341               | -0.046729506 | 0.020770665 | 0.026057244 |
| pcaac341.c51dc                  | -0.200246297 | 0.089012386 | 0.02606627  |
| pcaec422.pcaec360               | -0.007063542 | 0.003144608 | 0.02628909  |
| c8.pcaac341                     | -0.016256554 | 0.007246078 | 0.026469713 |
| pcaac383.smc261                 | 0.097543089  | 0.043479215 | 0.026473371 |
| pcaec402.pcaec443               | 0.143766511  | 0.064096653 | 0.026504929 |
| lysopcac180.smohc161            | -0.038336315 | 0.017094998 | 0.026532631 |
| putrescine.pcaac386             | 0.04484095   | 0.020002684 | 0.026585574 |
| pcaac320.spermidine             | 0.115033594  | 0.051323168 | 0.026611359 |
| pcaac363.c141                   | -0.05430852  | 0.024234217 | 0.026636114 |
| histidine.methionine            | -0.158747364 | 0.070845672 | 0.026651811 |
| pcaec384.c141                   | -0.090146707 | 0.040233634 | 0.026662987 |
| pcaec386.pcaec361               | -0.0212607   | 0.009494526 | 0.026751014 |

|                                    |              |             |             |
|------------------------------------|--------------|-------------|-------------|
| c10.pcaac402                       | 0.036694621  | 0.016392244 | 0.026799266 |
| pcaec300.pcaac343                  | -0.079849417 | 0.035710511 | 0.026967711 |
| lysopcac161.c181                   | 0.046866105  | 0.020999694 | 0.027255636 |
| pcaac362.pcaac380                  | -0.119335864 | 0.053480882 | 0.027281228 |
| lysopcac281.transhydroxyproline    | -0.059027368 | 0.026460293 | 0.027320851 |
| pcaec406.lysopcac160               | 0.138240787  | 0.061974671 | 0.027333694 |
| pcaec365.pcaac386                  | -0.027580884 | 0.012364823 | 0.027334284 |
| c102.c0                            | -0.003719135 | 0.001667859 | 0.027382395 |
| asparticacid.pcaac402              | -0.122246541 | 0.054830143 | 0.027405212 |
| pcaac426.lysopcac180               | 0.090966121  | 0.04080944  | 0.027439543 |
| pcaec386.spermidine                | 0.115142988  | 0.051658557 | 0.027447874 |
| asparagine.c102                    | 0.095512066  | 0.042854351 | 0.027459044 |
| pcaec300.c141                      | -0.04816883  | 0.021618007 | 0.027498577 |
| c51.c2                             | 0.096334845  | 0.043282231 | 0.027665956 |
| h1.smohc222                        | 0.029358587  | 0.013218292 | 0.027988849 |
| c8.pcaac402                        | 0.033772516  | 0.015212298 | 0.028056725 |
| lysopcac140.pcaec364               | -0.030063682 | 0.0135462   | 0.028107888 |
| pcaac360.pcaec444                  | 0.164284453  | 0.074205809 | 0.028488926 |
| asymmetricdimethylarginine.lysopca | 0.135836033  | 0.061375709 | 0.028539258 |
| pcaec321.pcaec360                  | -0.015496335 | 0.00700244  | 0.028553236 |
| pcaac323.smohc161                  | 0.038616279  | 0.017458364 | 0.0286298   |
| pcaac300.pcaec405                  | -0.094404246 | 0.042691711 | 0.028672668 |
| lysopcac140.pcaac406               | 0.089266179  | 0.040381271 | 0.028723551 |
| pcaac380.pcaac402                  | 0.085444714  | 0.038656033 | 0.028737654 |
| pcaec404.arginine                  | -0.179723726 | 0.081394068 | 0.028902421 |
| pcaec444.smohc222                  | 0.017405962  | 0.007885454 | 0.028953708 |
| lysopcac181.pcaec404               | 0.052538894  | 0.02380505  | 0.028975316 |
| pcaac426.pcaec322                  | -0.13316431  | 0.060336179 | 0.028975961 |
| citruline.spermidine               | 0.114593385  | 0.05194253  | 0.02903907  |
| pcaac320.c5                        | -0.014570455 | 0.006606358 | 0.029084723 |
| lysopcac281.c51dc                  | -0.212904288 | 0.096539811 | 0.029096768 |
| pcaec421.c5                        | -0.047757766 | 0.021656371 | 0.029103925 |
| pcaec342.c5                        | -0.032922811 | 0.014936024 | 0.029175549 |
| pcaec300.smohc161                  | 0.038835967  | 0.01763607  | 0.029332643 |
| c18.pcaec340                       | 0.101794811  | 0.046226869 | 0.029333057 |
| acetylmethionine.c2                | 0.060613203  | 0.027559729 | 0.029530921 |
| pcaec364.pcaec361                  | -0.025928081 | 0.011789567 | 0.029538198 |
| pcaec385.lysopcac180               | 0.092511124  | 0.042082781 | 0.029605606 |
| pcaec446.pcaac386                  | -0.070272517 | 0.031968201 | 0.029613794 |
| lysopcac182.glycine                | -0.039953449 | 0.018185535 | 0.029702056 |
| smohc221.pcaac425                  | 0.138949381  | 0.063247373 | 0.029707255 |
| pcaac381.c0                        | -0.001246297 | 0.00056762  | 0.029799957 |
| pcaec446.c141oh                    | 0.169891861  | 0.077431282 | 0.029913942 |
| creatinine.pcaec422                | 0.057190674  | 0.026090346 | 0.030066709 |
| pcaec422.pcaec405                  | -0.181671986 | 0.082901697 | 0.030111754 |

|                       |              |             |             |
|-----------------------|--------------|-------------|-------------|
| c51dc.pcaec444        | -0.16520789  | 0.075395134 | 0.030125583 |
| kynurenine.pcaec364   | -0.027217957 | 0.012429222 | 0.03022863  |
| pcaac406.lysopcac180  | 0.10671943   | 0.048783627 | 0.030394286 |
| c141.lysopcac181      | 0.069737212  | 0.031895234 | 0.030480934 |
| pcaec360.smohc222     | 0.015990329  | 0.007315522 | 0.030528624 |
| glycine.pcaac341      | -0.010072865 | 0.004608864 | 0.030548568 |
| pcaec446.pcaac362     | -0.069484687 | 0.031793674 | 0.030552596 |
| pcaac420.smohc161     | -0.022977214 | 0.010515869 | 0.03058885  |
| pcaac341.pcaec405     | -0.121130915 | 0.055450062 | 0.030626269 |
| c14.lysopcac180       | 0.07962778   | 0.036453078 | 0.030634781 |
| pcaec382.lysopcac170  | -0.084068521 | 0.038486552 | 0.030637046 |
| pcaec385.spermidine   | 0.111424305  | 0.051017372 | 0.030660658 |
| smc240.c181           | 0.016988214  | 0.007781827 | 0.030734619 |
| pcaec363.lysopcac161  | 0.113459424  | 0.051978056 | 0.030751864 |
| pcaec364.pcaec443     | 0.093926585  | 0.043043102 | 0.030803186 |
| pcaec386.pcaac402     | 0.084189449  | 0.038595874 | 0.030866934 |
| lysine.pcaec404       | -0.068494287 | 0.031413404 | 0.030934289 |
| isoleucine.pcaac386   | 0.042364109  | 0.019434781 | 0.030980253 |
| lysopcac281.c141      | -0.043540796 | 0.019974961 | 0.030983288 |
| pcaac384.alanine      | -0.122222097 | 0.056096077 | 0.031056814 |
| c142.glycine          | -0.041462824 | 0.019039003 | 0.031134036 |
| serotonin.pcaec360    | 0.019514664  | 0.008961001 | 0.03113789  |
| pcaac383.lysopcac160  | -0.055376331 | 0.025430273 | 0.031149882 |
| pcaec401.lysopcac160  | 0.05772084   | 0.02652079  | 0.031236586 |
| pcaec363.alanine      | -0.06857242  | 0.031512661 | 0.031267876 |
| prolinr.pcaec321      | 0.042706004  | 0.019640086 | 0.031390045 |
| pcaac320.glycine      | 0.148451853  | 0.068331362 | 0.031536072 |
| c101.spermidine       | 0.113201118  | 0.052113785 | 0.031562036 |
| pcaec343.pcaec361     | -0.016261636 | 0.00748697  | 0.031577416 |
| smohc241.smohc222     | 0.008287329  | 0.003816669 | 0.031626796 |
| pcaec420.lysopcac181  | 0.098375794  | 0.045311018 | 0.031644391 |
| lysopcac204.pcaac402  | 0.042474741  | 0.019564233 | 0.031650767 |
| pcaac360.pcaec364     | 0.015155577  | 0.006982029 | 0.03168051  |
| smc160.pcaec342       | -0.247934002 | 0.114270348 | 0.031753265 |
| pcaec422.smohc161     | -0.026846033 | 0.012377059 | 0.03180738  |
| glutamicacid.pcaec383 | 0.207989266  | 0.095910034 | 0.031840604 |
| pcaec386.c2           | 0.07615276   | 0.035118025 | 0.031848861 |
| pcaac363.c5           | -0.019968518 | 0.009216762 | 0.031999468 |
| smc180.c141           | -0.072915859 | 0.033665902 | 0.032052264 |
| pcaac386.c0           | -0.001343786 | 0.000620592 | 0.03209427  |
| smc160.c181           | 0.013836182  | 0.006393336 | 0.032185934 |
| methionine.pcaec360   | 0.007656262  | 0.003538444 | 0.032218857 |
| pcaec425.c2           | 0.090878416  | 0.042018625 | 0.032291336 |
| pcaac380.pcaac365     | 0.105668096  | 0.048876596 | 0.032360215 |
| pcaec341.c141oh       | 0.168083195  | 0.07777312  | 0.032418277 |

|                         |              |             |             |
|-------------------------|--------------|-------------|-------------|
| pcaec341.c5             | -0.015151825 | 0.007013575 | 0.032484702 |
| lysopcac204.pcaac365    | 0.064430178  | 0.029833526 | 0.032540004 |
| pcaec365.pcaec443       | 0.084272936  | 0.039033288 | 0.032591827 |
| pcaec360.c0             | -0.001278923 | 0.000592418 | 0.032606282 |
| isoleucine.c5           | 0.024850689  | 0.011513338 | 0.032637422 |
| pcaec343.pcaec360       | -0.009018449 | 0.004178781 | 0.032659086 |
| pcaac362.pcaec322       | -0.100663369 | 0.046646641 | 0.032671353 |
| pcaac405.pcaec404       | -0.019932378 | 0.009236606 | 0.032673091 |
| pcaec444.pcaec300       | -0.037535413 | 0.017406875 | 0.03280189  |
| pcaac421.pcaec444       | 0.184190253  | 0.085440844 | 0.032849057 |
| lysine.c0               | 0.001053592  | 0.00048889  | 0.032904371 |
| alphaaminoadipicacid.c2 | -0.100978888 | 0.046859118 | 0.032914242 |
| alanine.smohc161        | 0.015950702  | 0.00740557  | 0.032999553 |
| pcaac362.c141           | -0.043579076 | 0.020248221 | 0.033130768 |
| pcaac363.smc261         | 0.049285088  | 0.022905706 | 0.033178255 |
| h1.tyrosine             | 0.135541491  | 0.063041042 | 0.033307072 |
| pcaac363.lysopcac180    | 0.102511413  | 0.04768477  | 0.033329582 |
| pcaec340.pcaec360       | 0.015403643  | 0.007167223 | 0.033377549 |
| asparticacid.smohc222   | -0.009404284 | 0.004376972 | 0.033425791 |
| lysopcac180.c0          | 0.003508292  | 0.001633456 | 0.033491382 |
| c102.pcaac322           | -0.129097075 | 0.060129855 | 0.033556348 |
| pcaac281.c162           | -0.133296583 | 0.062133494 | 0.033690182 |
| pcaec343.pcaac384       | -0.149065754 | 0.069497787 | 0.03372494  |
| pcaec382.smohc222       | -0.043269225 | 0.020175083 | 0.033742306 |
| arginine.lysopcac181    | 0.080195234  | 0.037406722 | 0.033808775 |
| c141.glycine            | -0.055313439 | 0.025823372 | 0.033962776 |
| pcaec421.smohc161       | -0.028158455 | 0.013148768 | 0.034000807 |
| pcaac405.prolinr        | 0.043220181  | 0.020183551 | 0.034014886 |
| acetylmithoine.c5       | -0.024716849 | 0.011546738 | 0.034077796 |
| pcaec445.pcaec342       | -0.143642239 | 0.067106775 | 0.034085085 |
| asparticacid.pcaec321   | -0.036299943 | 0.016963026 | 0.034131014 |
| pcaac425.smohc161       | -0.027923736 | 0.013049951 | 0.034146434 |
| pcaac321.pcaac425       | -0.132283803 | 0.061829121 | 0.034167165 |
| c12.pcaec404            | 0.036785545  | 0.017198827 | 0.034222133 |
| pcaac321.pcaec383       | -0.16535823  | 0.077340427 | 0.034286883 |
| pcaec363.c5             | -0.028607436 | 0.01339591  | 0.034496014 |
| pcaec380.pcaec444       | 0.163774476  | 0.076709397 | 0.03454063  |
| smc180.smc181           | 0.109888811  | 0.051491461 | 0.034614092 |
| lysopcac203.c14         | 0.067708545  | 0.031743998 | 0.034711063 |
| smohc222.smohc161       | -0.038013685 | 0.017825352 | 0.034743914 |
| pcaec340.c141           | -0.057398428 | 0.02692293  | 0.034794959 |
| pcaec343.pcaec443       | 0.057653166  | 0.027053684 | 0.034869416 |
| pcaac424.pcaec300       | -0.048557094 | 0.022788313 | 0.034892582 |
| pcaac341.pcaec383       | -0.147376596 | 0.069168197 | 0.03490018  |
| pcaac300.pcaec360       | 0.010336256  | 0.004851536 | 0.034915863 |

|                                 |              |             |             |
|---------------------------------|--------------|-------------|-------------|
| pcaec362.pcaac385               | -0.075317424 | 0.03535542  | 0.034934233 |
| pcaec405.pcaec444               | 0.169050721  | 0.07942234  | 0.035084998 |
| c182.pcaac341                   | -0.006836991 | 0.003212595 | 0.03511203  |
| pcaac240.pcaec444               | 0.278374467  | 0.130804993 | 0.03511365  |
| c12.pcaac402                    | 0.032400356  | 0.015230499 | 0.035183799 |
| pcaec384.smohc161               | -0.039996061 | 0.018809214 | 0.035262188 |
| lysopcac181.smohc161            | -0.031532076 | 0.014836963 | 0.035361459 |
| lysopcac182.lysopcac170         | -0.047048554 | 0.022142494 | 0.03539797  |
| pcaac383.c2                     | -0.097453545 | 0.04586844  | 0.035412977 |
| methioninesulfoxide.pcaec444    | 0.189371034  | 0.089217745 | 0.035588594 |
| asparagine.pcaec300             | -0.028574634 | 0.01346473  | 0.035621706 |
| alphaaminoadipicacid.pcaac386   | -0.037894504 | 0.017867523 | 0.03573509  |
| pcaac380.spermidine             | 0.110323703  | 0.052019441 | 0.035738743 |
| arginine.pcaec360               | 0.014635079  | 0.006903808 | 0.0358212   |
| pcaec420.pcaec322               | -0.171745964 | 0.081058193 | 0.035912142 |
| smohc141.pcaac425               | 0.115059796  | 0.054310555 | 0.035933256 |
| h1.c5                           | 0.033987072  | 0.016043509 | 0.035943751 |
| pcaac364.smc261                 | 0.103031105  | 0.048637004 | 0.035949148 |
| pcaec386.pcaac386               | -0.033868904 | 0.015999297 | 0.036075924 |
| pcaac321.pcaec321               | 0.054266347  | 0.025635972 | 0.03608412  |
| pcaac300.pcaec322               | -0.086083567 | 0.040687856 | 0.036179146 |
| c16.pcaac406                    | 0.082231725  | 0.038871224 | 0.036197833 |
| pcaec401.pcaec443               | 0.084994601  | 0.040177786 | 0.036200302 |
| lysopcac280.pcaec444            | 0.19382841   | 0.09163877  | 0.036228664 |
| pcaec421.pcaec300               | -0.048340516 | 0.022893647 | 0.036542972 |
| pcaec406.lysopcac180            | 0.122289219  | 0.057917734 | 0.03655134  |
| c101.pcaac402                   | 0.019097584  | 0.009047252 | 0.036600184 |
| pcaec340.lysopcac180            | 0.097993438  | 0.046434033 | 0.036643214 |
| pcaac300.lysopcac181            | 0.063110838  | 0.029911342 | 0.03668262  |
| pcaac321.glycine                | 0.06217935   | 0.029475922 | 0.036720655 |
| asymmetricdimethylarginine.c141 | -0.041119642 | 0.019492769 | 0.036721929 |
| c141oh.pcaac402                 | 0.027032738  | 0.012821106 | 0.036812041 |
| smc161.pcaac341                 | -0.00585048  | 0.002775005 | 0.036827752 |
| pcaac322.pcaec360               | 0.007809199  | 0.003707084 | 0.036979043 |
| prolinr.lysopcac180             | -0.161862363 | 0.076839974 | 0.036985609 |
| glutamine.spermidine            | 0.105759624  | 0.0502316   | 0.037078102 |
| methioninesulfoxide.pcaec321    | 0.04910073   | 0.023339105 | 0.037223773 |
| acetylornithoine.smohc221       | -0.100124511 | 0.047605878 | 0.037277098 |
| pcaec322.c0                     | -0.001076171 | 0.000511964 | 0.037379443 |
| pcaec365.arginine               | -0.093509974 | 0.044509922 | 0.037483578 |
| lysopcac204.pcaec404            | 0.022767176  | 0.010840332 | 0.037541737 |
| lysopcac204.smohc161            | -0.047998857 | 0.022858974 | 0.037581717 |
| c4.c181                         | 0.010843326  | 0.00516455  | 0.037600817 |
| pcaac385.pcaac240               | -0.050810462 | 0.024204083 | 0.037629197 |
| pcaac363.spermidine             | 0.110064808  | 0.052463109 | 0.037746304 |

|                              |              |             |             |
|------------------------------|--------------|-------------|-------------|
| smohc241.transhydroxyproline | -0.046233895 | 0.022048641 | 0.037840058 |
| pcaec340.spermidine          | 0.112905339  | 0.05387222  | 0.037939736 |
| pcaec363.pcaec383            | -0.096760445 | 0.046205887 | 0.038091968 |
| pcaec384.pcaec443            | 0.07756039   | 0.037038631 | 0.038098735 |
| c181.pcaec444                | -0.132032866 | 0.063057778 | 0.038116937 |
| pcaec383.pcaec443            | 0.235501902  | 0.112499099 | 0.038159772 |
| smc160.c0                    | -0.000696106 | 0.000332557 | 0.038175353 |
| pcaac425.pcaec300            | -0.030221261 | 0.014440114 | 0.038205003 |
| smohc161.pcaec360            | -0.026829128 | 0.012821347 | 0.038235228 |
| pcaac366.c0                  | -0.001941377 | 0.000927964 | 0.038276477 |
| alphaaminoadipicacid.c0      | 0.00094016   | 0.000449431 | 0.038293952 |
| pcaec343.alanine             | -0.064900833 | 0.031029919 | 0.038324289 |
| pcaac385.pcaec360            | 0.007645888  | 0.003657676 | 0.038432681 |
| pcaac383.smohc222            | -0.010337872 | 0.004947363 | 0.038505348 |
| pcaec322.spermidine          | 0.107116229  | 0.051318083 | 0.038713514 |
| pcaac383.pcaac343            | -0.049663993 | 0.023821754 | 0.038942127 |
| lysopcac181.smohc222         | 0.006649771  | 0.003190371 | 0.038987497 |
| pcaac366.transhydroxyproline | 0.068057232  | 0.03265675  | 0.039015979 |
| pcaec322.pcaec360            | -0.013588367 | 0.006520954 | 0.039036022 |
| pcaec406.pcaec342            | -0.245668703 | 0.117903513 | 0.039050699 |
| pcaec444.c2                  | 0.097429132  | 0.046762037 | 0.039062984 |
| glycine.pcaec300             | -0.035647468 | 0.017109515 | 0.039064941 |
| leucine.pcaec322             | 0.183567895  | 0.088135235 | 0.039128844 |
| lysopcac170.pcaac365         | 0.101556988  | 0.048774518 | 0.039186801 |
| prolinr.pcaec443             | -0.097227875 | 0.046700387 | 0.0392075   |
| c181.prolinr                 | 0.04946916   | 0.023771372 | 0.039292134 |
| pcaec420.pcaec363            | 0.043569839  | 0.020936645 | 0.03929277  |
| pcaac424.smohc161            | -0.036149034 | 0.017377429 | 0.039367558 |
| c102.c8                      | 0.061711151  | 0.029667149 | 0.039377969 |
| citruine.c16                 | -0.068260873 | 0.032818968 | 0.039396237 |
| prolinr.pcaec340             | 0.118448627  | 0.056976987 | 0.039492914 |
| pcaec380.pcaec364            | 0.017234952  | 0.008291343 | 0.0395132   |
| pcaec425.pcaec321            | -0.045594914 | 0.02195611  | 0.039703258 |
| pcaec422.pcaec364            | 0.014161758  | 0.006819866 | 0.039712094 |
| pcaac426.pcaec300            | -0.036946659 | 0.017814092 | 0.039950351 |
| citruine.pcaac380            | 0.080242631  | 0.038697269 | 0.039989402 |
| pcaac385.c51dc               | -0.193763198 | 0.093461159 | 0.040027606 |
| pcaec321.c141oh              | 0.176516128  | 0.085173391 | 0.040099683 |
| ornithine.c2                 | -0.09693551  | 0.046794177 | 0.040185275 |
| lysopcac203.pcaec363         | 0.047769222  | 0.02305995  | 0.040185855 |
| glutamicacid.smc261          | -0.062361255 | 0.030109322 | 0.040220211 |
| lysopcac160.pcaec403         | 0.138386402  | 0.066846537 | 0.0403105   |
| pcaec340.c141oh              | 0.179334291  | 0.086651266 | 0.040367667 |
| c4.pcaac281                  | 0.010026018  | 0.004844496 | 0.040371533 |
| smc241.c141oh                | 0.148968205  | 0.071989665 | 0.040397158 |

|                           |              |             |             |
|---------------------------|--------------|-------------|-------------|
| c10.pcaac386              | 0.037737995  | 0.018237152 | 0.040397894 |
| pcaec360.spermidine       | 0.13222983   | 0.063914835 | 0.040440589 |
| pcaac380.lysopcac180      | 0.110973154  | 0.053666656 | 0.040538027 |
| pcaac366.glycine          | 0.091277556  | 0.044144476 | 0.040549745 |
| pcaac360.pcaac402         | 0.135368976  | 0.065471156 | 0.040558165 |
| c4.pcaac406               | 0.08840934   | 0.04276475  | 0.04058407  |
| pcaac343.pcaac425         | -0.15110497  | 0.073097806 | 0.040601284 |
| pcaac300.lysopcac180      | 0.060732052  | 0.029411168 | 0.040815081 |
| pcaac323.smc202           | 0.098259052  | 0.047587451 | 0.040826758 |
| pcaac362.pcaec422         | 0.032683615  | 0.015830925 | 0.040852504 |
| pcaac300.c162             | -0.122074528 | 0.059151875 | 0.040929019 |
| pcaec301.smohc222         | 0.008961282  | 0.004342722 | 0.040951179 |
| lysopcac181.pcaac402      | 0.088923905  | 0.043097965 | 0.040972416 |
| smc260.pcaec404           | 0.04212541   | 0.020429032 | 0.041094109 |
| pcaac401.pcaac402         | 0.338170443  | 0.164040532 | 0.041145469 |
| pcaec386.arginine         | -0.078838078 | 0.0382646   | 0.041258389 |
| pcaac424.acetylmethionine | -0.17088366  | 0.08295722  | 0.041300965 |
| smohc222.smc261           | 0.081255443  | 0.039449444 | 0.041316978 |
| lysine.lysopcac181        | 0.063833452  | 0.030999338 | 0.041370269 |
| smc181.c141               | -0.050549793 | 0.024556265 | 0.0414343   |
| c182.pcaec361             | -0.013992931 | 0.006797581 | 0.041435576 |
| pcaac426.pcaec383         | -0.132772583 | 0.064506536 | 0.041458476 |
| pcaac341.spermidine       | 0.11168757   | 0.05429024  | 0.041560845 |
| lysopcac182.pcaec364      | -0.057478595 | 0.027941752 | 0.041574982 |
| lysopcac161.tyrosine      | -0.092494619 | 0.04496654  | 0.041586777 |
| c162.transhydroxyproline  | -0.040389956 | 0.019639438 | 0.041625031 |
| pcaac426.pcaac386         | -0.0467721   | 0.022744008 | 0.041636342 |
| pcaac420.lysopcac170      | 0.09051146   | 0.044019142 | 0.041663137 |
| glutamine.pcaec364        | -0.020336817 | 0.00989078  | 0.041667559 |
| pcaec425.c5               | -0.029755772 | 0.014475343 | 0.041718556 |
| h1.pcaac425               | 0.07024024   | 0.034172952 | 0.041736575 |
| asparticacid.glutamicacid | 0.205696061  | 0.100099677 | 0.041787678 |
| pcaac425.pcaec444         | 0.171944097  | 0.083682179 | 0.041805778 |
| smc160.pcaec363           | -0.089758318 | 0.04371101  | 0.0419314   |
| pcaec365.pcaec342         | -0.253120621 | 0.123290498 | 0.041971375 |
| pcaac360.pcaec300         | -0.085803176 | 0.041826829 | 0.042134191 |
| pcaac341.pcaac365         | -0.053989202 | 0.026321477 | 0.042158345 |
| pcaec420.pcaac386         | -0.028808185 | 0.014055949 | 0.042317626 |
| c101.pcaac281             | 0.008983088  | 0.004385708 | 0.04244391  |
| pcaac364.spermidine       | 0.105398359  | 0.051469491 | 0.042491738 |
| pcaec342.pcaec443         | 0.06536808   | 0.031926999 | 0.042527551 |
| pcaac401.pcaec300         | -0.061656204 | 0.030136193 | 0.042677525 |
| pcaec343.pcaac402         | 0.045903807  | 0.022442135 | 0.042726389 |
| pcaac342.smc261           | 0.049770587  | 0.024342202 | 0.042807219 |
| pcaac300.c0               | -0.000723048 | 0.000353704 | 0.042847624 |



|                          |              |             |             |
|--------------------------|--------------|-------------|-------------|
| pcaac384.pcaec321        | 0.07774073   | 0.038128973 | 0.043384344 |
| putrescine.pcaac402      | 0.032481789  | 0.015931498 | 0.043389187 |
| c141.pcaac386            | 0.026376006  | 0.012940373 | 0.04344678  |
| glutamicacid.c14         | -0.139064213 | 0.068254203 | 0.043530676 |
| pcaac380.pcaec360        | -0.00817266  | 0.004014436 | 0.043696236 |
| ornithine.pcaec360       | -0.017179568 | 0.008438797 | 0.043699655 |
| pcaec405.c5              | -0.054857979 | 0.026950657 | 0.043728915 |
| pcaac321.pcaac365        | -0.042306321 | 0.020786903 | 0.043755186 |
| pcaac424.pcaec444        | 0.158483859  | 0.077916377 | 0.043879168 |
| pcaac300.c2              | 0.096934062  | 0.047707532 | 0.044103057 |
| pcaec443.pcaec300        | -0.034362687 | 0.016921764 | 0.044222285 |
| smohc241.smohc141        | 0.196655835  | 0.096861465 | 0.044263525 |
| c2.pcaec405              | -0.098704018 | 0.048623995 | 0.044298015 |
| pcaac300.pcaac365        | -0.076799339 | 0.03783806  | 0.044324793 |
| phenylalanine.pcaec321   | -0.063297056 | 0.031186119 | 0.044327895 |
| pcaac383.c162            | -0.118809922 | 0.05855393  | 0.044388414 |
| lysine.methionine        | -0.079596786 | 0.039240187 | 0.04445221  |
| pcaec422.pcaec300        | -0.055328657 | 0.027302647 | 0.044654846 |
| pcaac240.pcaec443        | 0.206081001  | 0.101737405 | 0.044745978 |
| lysopcac203.pcaec444     | -0.183386805 | 0.090558605 | 0.044803671 |
| pcaac385.pcaec443        | 0.068010243  | 0.033584613 | 0.044805796 |
| putrescine.pcaec364      | -0.051827697 | 0.025604614 | 0.044898209 |
| pcaac364.pcaec405        | -0.108277555 | 0.053512823 | 0.044977502 |
| pcaac361.pcaec404        | -0.052474324 | 0.025936141 | 0.044996515 |
| pcaac383.c141            | -0.042806894 | 0.02116529  | 0.045070522 |
| c10.pcaac365             | 0.052659284  | 0.026048083 | 0.045163283 |
| pcaac361.spermidine      | 0.11198799   | 0.055419616 | 0.045256622 |
| pcaac406.pcaec364        | -0.039098065 | 0.019364286 | 0.045429794 |
| c102.pcaac323            | -0.143188293 | 0.070921439 | 0.045441455 |
| smc180.pcaac425          | 0.129716027  | 0.064254641 | 0.045461451 |
| pcaec405.smohc161        | -0.028473237 | 0.01410672  | 0.045499825 |
| pcaac362.pcaec361        | -0.017263083 | 0.0085569   | 0.045602278 |
| pcaac385.pcaac402        | 0.053533989  | 0.026539224 | 0.045631981 |
| pcaac422.smohc161        | -0.025584168 | 0.012686382 | 0.045684961 |
| c141.pcaec404            | 0.033864116  | 0.016793026 | 0.04569614  |
| pcaec363.pcaec361        | -0.015636773 | 0.007754616 | 0.045707898 |
| ornithine.pcaac402       | -0.049050626 | 0.024326775 | 0.04572109  |
| pcaec383.pcaec444        | 0.294165389  | 0.145905393 | 0.045740647 |
| pcaec342.lysopcac181     | 0.058026404  | 0.028795594 | 0.04584921  |
| pcaec342.c2              | 0.086223659  | 0.042809169 | 0.045952679 |
| pcaec301.c181            | -0.021435848 | 0.010646806 | 0.046035746 |
| pcaac384.c51dc           | -0.172620158 | 0.085756611 | 0.04608386  |
| methioninesulfoxide.c141 | -0.087469348 | 0.043457907 | 0.046102054 |
| pcaac362.c5              | -0.02097293  | 0.010422384 | 0.046149027 |
| putrescine.glutamicacid  | -0.119424928 | 0.059379743 | 0.046265517 |

|                              |              |             |             |
|------------------------------|--------------|-------------|-------------|
| c162.pcaac402                | 0.043617406  | 0.021696237 | 0.046355351 |
| methionine.pcaec300          | -0.01121465  | 0.005579368 | 0.046392422 |
| pcaac341.pcaac240            | -0.028291001 | 0.014078938 | 0.046453104 |
| c162.c102                    | 0.09222467   | 0.045915762 | 0.046549065 |
| c182.prolinr                 | 0.029506094  | 0.0146904   | 0.046552643 |
| pcaac406.prolinr             | 0.044786103  | 0.022305573 | 0.046626388 |
| pcaac365.pcaac240            | -0.042200051 | 0.0210298   | 0.046751957 |
| pcaac300.c51dc               | -0.161648263 | 0.080555325 | 0.046752476 |
| pcaec365.spermidine          | 0.101763243  | 0.050733893 | 0.046844294 |
| lysopcac140.pcaec403         | 0.131851012  | 0.06575631  | 0.046917577 |
| pcaec445.c141oh              | 0.130689844  | 0.065190944 | 0.0469633   |
| pcaec384.lysopcac181         | 0.094176509  | 0.04698688  | 0.047007611 |
| asparticacid.c2              | -0.114975598 | 0.057392224 | 0.047114434 |
| pcaac425.pcaec364            | 0.016167133  | 0.0080842   | 0.047494541 |
| pcaec361.c141oh              | 0.138960105  | 0.069509409 | 0.04756982  |
| c181.c18                     | -0.100631202 | 0.050349056 | 0.047622875 |
| pcaec424.c0                  | -0.001276283 | 0.000638736 | 0.04768124  |
| ornithine.pcaac386           | -0.056677208 | 0.028376054 | 0.047766726 |
| pcaac381.pcaac402            | 0.048849496  | 0.024470024 | 0.047883445 |
| pcaec420.lysopcac160         | 0.042849809  | 0.021466954 | 0.047907359 |
| pcaec386.pcaec364            | 0.041869147  | 0.020979043 | 0.047942818 |
| pcaac363.c51dc               | -0.185015683 | 0.09272038  | 0.047980877 |
| pcaac380.pcaec361            | -0.0171066   | 0.008575306 | 0.048041369 |
| c51.c12                      | -0.109412498 | 0.054851225 | 0.048058336 |
| pcaec445.lysopcac180         | 0.057042821  | 0.028613839 | 0.048188201 |
| pcaec443.arginine            | -0.138929474 | 0.069709208 | 0.048249532 |
| lysopcac204.pcaec422         | -0.066470058 | 0.033387056 | 0.048481983 |
| pcaec420.pcaec383            | -0.155258658 | 0.077986162 | 0.048486912 |
| pcaec401.c5                  | -0.035823494 | 0.017994994 | 0.048498166 |
| pcaec420.smc261              | 0.065914957  | 0.033126143 | 0.04860189  |
| pcaac343.pcaec360            | 0.010463057  | 0.005259004 | 0.048631544 |
| pcaec403.pcaec300            | -0.032080515 | 0.016130285 | 0.048711232 |
| lysopcac160.spermidine       | -0.113840685 | 0.057247597 | 0.048741448 |
| c102.spermidine              | 0.111584937  | 0.05612232  | 0.048777432 |
| pcaac386.pcaac385            | -0.057674134 | 0.029012787 | 0.048817559 |
| pcaec443.transhydroxyproline | 0.074395156  | 0.037426269 | 0.048829602 |
| pcaac322.lysopcac180         | 0.085259749  | 0.04289421  | 0.048841264 |
| pcaec445.c141                | -0.044266528 | 0.022272092 | 0.048857119 |
| pcaac363.smohc161            | -0.074422025 | 0.037453831 | 0.048913128 |
| pcaec383.pcaec380            | 0.122445838  | 0.061639752 | 0.048975792 |
| pcaec341.c0                  | -0.000899202 | 0.000452693 | 0.048991332 |
| smohc161.pcaec300            | 0.0392426    | 0.019757084 | 0.049000556 |
| smc181.pcaec363              | -0.033130892 | 0.016683154 | 0.049041637 |
| arginine.pcaec404            | -0.058714265 | 0.029592445 | 0.049243437 |
| pcaac322.c162                | -0.115068565 | 0.057996296 | 0.049246704 |

|                                |              |             |             |
|--------------------------------|--------------|-------------|-------------|
| serine.pcaec360                | -0.007948689 | 0.004006697 | 0.049271163 |
| pcaec362.c5                    | -0.023415546 | 0.011807591 | 0.049356761 |
| pcaec300.pcaec443              | 0.075786266  | 0.0382212   | 0.049386073 |
| pcaac320.pcaac341              | -0.031575103 | 0.015936236 | 0.049555131 |
| kynurenine.c14                 | -0.050326688 | 0.025405364 | 0.049599666 |
| isoleucine.pcaec443            | -0.075148399 | 0.037959608 | 0.049742083 |
| c5.c0                          | 0.002751992  | 0.001390282 | 0.049770061 |
| acetylmethionine.pcaec322      | 0.156738572  | 0.079189054 | 0.049787353 |
| h1.c14                         | 0.132544158  | 0.066973873 | 0.049816178 |
| citruiline.transhydroxyproline | 0.04349036   | 0.021978839 | 0.049850915 |
| pcaec340.pcaec405              | -0.111576735 | 0.056450195 | 0.050100551 |
| pcaac365.pcaec443              | 0.076649443  | 0.038790632 | 0.050166233 |
| c51dc.smc202                   | 0.070574345  | 0.035720554 | 0.050194108 |
| glutamine.smc261               | 0.041865334  | 0.021189902 | 0.050195712 |
| pcaac360.c2                    | 0.104027943  | 0.052657217 | 0.050213181 |
| h1.pcaec405                    | 0.078647854  | 0.03982851  | 0.050317187 |
| smc241.pcaec342                | -0.178549151 | 0.09042556  | 0.05033089  |
| pcaec423.pcaec343              | 0.167648061  | 0.084908083 | 0.050339813 |
| pcaec445.pcaac240              | -0.031838527 | 0.016125669 | 0.050347271 |
| pcaec446.lysopcac161           | -0.103562617 | 0.052470006 | 0.050422183 |
| arginine.smohc161              | 0.022239596  | 0.011268903 | 0.050446576 |
| pcaac403.pcaec300              | -0.026366646 | 0.013361528 | 0.050470898 |
| smc180.pcaec363                | -0.026404169 | 0.013401353 | 0.050824805 |
| pcaec444.c0                    | -0.001278015 | 0.000648766 | 0.050864697 |
| pcaec445.pcaec422              | -0.069032758 | 0.035045646 | 0.050878798 |
| c3.lysopcac161                 | -0.172727234 | 0.087720113 | 0.050962725 |
| c182.pcaec321                  | -0.075044068 | 0.03811693  | 0.050995994 |
| pcaec362.pcaac425              | 0.097444879  | 0.049500973 | 0.051023998 |
| pcaec402.pcaec321              | -0.054182483 | 0.027527239 | 0.051049837 |
| methionine.c14                 | 0.052830354  | 0.02684439  | 0.05108476  |
| pcaec363.c2                    | 0.066857205  | 0.033972548 | 0.051089976 |
| pcaec445.spermidine            | 0.101035136  | 0.051344517 | 0.051111984 |
| pcaac405.pcaec364              | -0.034527577 | 0.017554776 | 0.05122151  |
| serine.tyrosine                | -0.086248446 | 0.043856425 | 0.051249374 |
| pcaac422.pcaec382              | -0.025517846 | 0.012979862 | 0.051325534 |
| c181.pcaec364                  | -0.029406365 | 0.014959696 | 0.051354819 |
| pcaec425.transhydroxyproline   | -0.111454819 | 0.05674558  | 0.051541087 |
| lysopcac280.c102               | -0.08459666  | 0.043076784 | 0.051571239 |
| smc180.pcaec300                | 0.040514008  | 0.020638449 | 0.051667703 |
| smohc221.c181                  | 0.02089925   | 0.010650147 | 0.051749009 |
| pcaec363.pcaec443              | 0.051154639  | 0.026073887 | 0.051799966 |
| pcaac384.histidine             | 0.080062957  | 0.040817529 | 0.051850141 |
| alanine.pcaec422               | 0.03589783   | 0.0183023   | 0.051862053 |
| c181.c2                        | 0.085450186  | 0.043568591 | 0.051874308 |
| smc241.smohc161                | -0.029805914 | 0.015202353 | 0.051953045 |

|                                    |              |             |             |
|------------------------------------|--------------|-------------|-------------|
| pcaec380.smohc161                  | -0.024278928 | 0.012386506 | 0.052012171 |
| lysine.c8                          | -0.075596561 | 0.038607953 | 0.052255328 |
| c4.pcaec404                        | -0.025825333 | 0.013192417 | 0.052310795 |
| c16.transhydroxyproline            | -0.036600413 | 0.018703775 | 0.052399034 |
| histidine.pcaec300                 | -0.023652757 | 0.012087764 | 0.052410242 |
| pcaac425.lysopcac170               | -0.039913316 | 0.020415155 | 0.052609023 |
| creatinine.c0                      | -0.0007732   | 0.000395576 | 0.05266447  |
| putrescine.smohc222                | 0.004311026  | 0.002206668 | 0.052781827 |
| c14.glycine                        | -0.076832205 | 0.039333429 | 0.052815258 |
| c141oh.glycine                     | -0.056392282 | 0.028879026 | 0.052892992 |
| pcaec381.pcaec300                  | -0.016120746 | 0.008261078 | 0.053048678 |
| glutamicacid.pcaec364              | 0.031427071  | 0.016107017 | 0.053080854 |
| smc202.glycine                     | -0.055408819 | 0.028405681 | 0.053143023 |
| c162.smc181                        | -0.03946952  | 0.020238765 | 0.053194819 |
| pcaec423.pcaec422                  | 0.138367749  | 0.070989179 | 0.053322023 |
| asymmetricdimethylarginine.lysopca | -0.08443405  | 0.043327134 | 0.053368084 |
| c2.pcaac406                        | 0.082556953  | 0.042364173 | 0.053369572 |
| pcaac380.prolinr                   | 0.046964845  | 0.024103999 | 0.053408107 |
| smc240.pcaec300                    | -0.01487229  | 0.007633937 | 0.053437658 |
| citruline.smc160                   | -0.091545288 | 0.046993804 | 0.05345603  |
| methioninesulfoxide.prolinr        | -0.094005516 | 0.048257123 | 0.053457921 |
| pcaac361.smc160                    | -0.141527351 | 0.072656418 | 0.053471757 |
| pcaac343.pcaac365                  | -0.081034918 | 0.04161021  | 0.053522809 |
| smc240.c141oh                      | 0.154172006  | 0.079238859 | 0.053742856 |
| pcaac386.c5                        | -0.014394865 | 0.007398761 | 0.053753043 |
| c12.pcaec444                       | -0.199234361 | 0.102427219 | 0.053807323 |
| kynurenine.c0                      | -0.001280476 | 0.000658531 | 0.053891049 |
| pcaec380.transhydroxyproline       | 0.064868092  | 0.033370228 | 0.053958214 |
| pcaac281.lysopcac180               | 0.087726108  | 0.045151008 | 0.054073117 |
| pcaec386.pcaac365                  | 0.091213194  | 0.046951299 | 0.054101168 |
| c14.lysopcac181                    | 0.078505277  | 0.040425074 | 0.054189718 |
| pcaec446.c5                        | -0.015783222 | 0.008127563 | 0.054196669 |
| pcaac300.pcaac281                  | -0.006834508 | 0.003519786 | 0.054220932 |
| c181.pcaec361                      | -0.021500899 | 0.011073258 | 0.054226259 |
| pcaec362.c141                      | -0.034716038 | 0.017885369 | 0.054307794 |
| prolinr.lysopcac170                | -0.032729743 | 0.016866752 | 0.05437413  |
| methioninesulfoxide.smohc161       | -0.035646437 | 0.018375805 | 0.054451632 |
| kynurenine.pcaac402                | 0.106533554  | 0.054941514 | 0.054552591 |
| pcaac323.pcaec443                  | 0.077212763  | 0.039823632 | 0.054573215 |
| c5.pcaac406                        | 0.105124624  | 0.054234114 | 0.054637126 |
| lysopcac182.pcaec300               | -0.013672672 | 0.007055021 | 0.054679352 |
| pcaac402.pcaec300                  | -0.032481868 | 0.016763136 | 0.054717498 |
| pcaec446.lysopcac180               | 0.072951972  | 0.037649425 | 0.054721371 |
| serine.alanine                     | 0.065774915  | 0.033951921 | 0.0547669   |
| lysopcac180.pcaec404               | 0.038998469  | 0.020137075 | 0.054846621 |

|                                    |              |             |             |
|------------------------------------|--------------|-------------|-------------|
| methionine.smohc222                | -0.008874861 | 0.004582727 | 0.054854147 |
| pcaac404.c141                      | -0.08807102  | 0.045494497 | 0.054944189 |
| lysopcac204.valine                 | -0.11241231  | 0.058093527 | 0.055047947 |
| pcaec360.pcaac404                  | 0.017845697  | 0.009222537 | 0.055049599 |
| c102.pcaac402                      | 0.023124736  | 0.011962898 | 0.05529439  |
| pcaec363.c141oh                    | 0.176722821  | 0.091428838 | 0.055311526 |
| lysopcac204.lysopcac180            | 0.146004286  | 0.07555339  | 0.055365692 |
| pcaac281.pcaec342                  | -0.236836608 | 0.122590247 | 0.055431505 |
| smohc141.smohc222                  | -0.013816664 | 0.007151838 | 0.055435602 |
| smc160.smc202                      | -0.126352497 | 0.065406101 | 0.055446668 |
| c14.c8                             | 0.06920022   | 0.035861708 | 0.055718296 |
| c8.pcaec381                        | 0.080850213  | 0.041935922 | 0.055930768 |
| pcaec445.lysopcac161               | -0.103909254 | 0.053903508 | 0.05596298  |
| asymmetricdimethylarginine.pcaac28 | 0.005730737  | 0.002973147 | 0.05598704  |
| lysopcac140.pcaec300               | -0.016569751 | 0.008598519 | 0.056043804 |
| histidine.pcaec360                 | 0.012142119  | 0.006303097 | 0.056128617 |
| c102.pcaec321                      | -0.12907431  | 0.067030872 | 0.056226749 |
| pcaac405.lysopcac180               | 0.090890662  | 0.047205003 | 0.056245606 |
| lysopcac182.pcaac281               | 0.002723892  | 0.001415119 | 0.056320711 |
| methionine.pcaec422                | 0.040429995  | 0.021005952 | 0.056340708 |
| pcaac420.pcaac402                  | 0.064696368  | 0.033613933 | 0.056341131 |
| pcaac386.pcaac341                  | -0.016536491 | 0.008596166 | 0.056465535 |
| lysopcac161.c141                   | -0.051179251 | 0.026609322 | 0.056509544 |
| pcaac422.pcaec364                  | 0.013109647  | 0.006816798 | 0.056537343 |
| pcaec406.smohc222                  | 0.009625774  | 0.005005632 | 0.056556335 |
| pcaac380.pcaac323                  | -0.15205232  | 0.079149655 | 0.056799551 |
| pcaec406.prolinr                   | 0.040862737  | 0.021270961 | 0.056801618 |
| pcaac363.pcaec384                  | -0.097048002 | 0.050519892 | 0.056810714 |
| pcaec321.pcaec361                  | -0.01273319  | 0.00663149  | 0.056922286 |
| lysopcac170.pcaac281               | -0.00687824  | 0.003584534 | 0.057081039 |
| c8.pcaec404                        | 0.03463581   | 0.018052469 | 0.057112584 |
| pcaec364.c2                        | 0.083753248  | 0.043679342 | 0.057261314 |
| pcaec381.pcaac281                  | -0.006858806 | 0.003578349 | 0.057351686 |
| glutamine.alanine                  | -0.05983575  | 0.031225951 | 0.05742009  |
| lysopcac161.c51                    | -0.121799639 | 0.063574721 | 0.057467425 |
| pcaec321.smc261                    | 0.094775212  | 0.049472075 | 0.05748267  |
| arginine.pcaac281                  | -0.006520505 | 0.003404332 | 0.057531091 |
| pcaac323.pcaac386                  | 0.034416913  | 0.017969157 | 0.057533948 |
| glutamicacid.alanine               | 0.068974239  | 0.036018802 | 0.057583063 |
| pcaac342.lysopcac180               | 0.074665967  | 0.039022296 | 0.057780626 |
| methioninesulfoxide.pcaec300       | -0.02021315  | 0.01056581  | 0.057825367 |
| creatinine.spermidine              | 0.099691889  | 0.052116845 | 0.057853544 |
| acetylorithoine.lysopcac160        | 0.016085932  | 0.008411879 | 0.057926692 |
| prolinr.pcaac403                   | 0.014841863  | 0.007765196 | 0.058050504 |
| c182.c18                           | -0.055347002 | 0.028964518 | 0.058112224 |

|                                   |              |             |             |
|-----------------------------------|--------------|-------------|-------------|
| histidine.pcaac386                | 0.028753387  | 0.015050315 | 0.05816039  |
| lysopcac181.pcaac406              | 0.051579888  | 0.027007708 | 0.058246497 |
| pcaac360.c0                       | -0.000874303 | 0.000457806 | 0.058253442 |
| pcaac385.c18                      | -0.049564801 | 0.025953634 | 0.058256482 |
| pcaac240.pcaac341                 | -0.014700431 | 0.007698168 | 0.058275081 |
| c101.c181                         | 0.024142249  | 0.012649298 | 0.058407424 |
| c3.pcaec360                       | 0.00565967   | 0.002965975 | 0.058457605 |
| c3.c5                             | -0.050432568 | 0.026429524 | 0.058458693 |
| c51dc.smohc161                    | 0.024368894  | 0.012772837 | 0.058500669 |
| pcaec322.pcaec361                 | -0.010962286 | 0.005749986 | 0.058680824 |
| spermidine.c0                     | 0.006468365  | 0.003393015 | 0.058695504 |
| asymmetricdimethylarginine.spermi | 0.097755113  | 0.051279924 | 0.058705068 |
| glutamicacid.c2                   | -0.125194985 | 0.06567454  | 0.058706339 |
| c101.tyrosine                     | 0.113397964  | 0.059492933 | 0.058735061 |
| pcaec360.smohc161                 | -0.118072079 | 0.06195235  | 0.058764042 |
| c5.c141                           | -0.06814745  | 0.035758547 | 0.058775346 |
| smohc161.pcaac341                 | -0.02324928  | 0.012203391 | 0.05885626  |
| putrescine.pcaec360               | 0.006560265  | 0.003444851 | 0.058958695 |
| pcaec422.pcaac323                 | -0.143416136 | 0.075334789 | 0.059044227 |
| kynurenine.spermidine             | 0.116764725  | 0.061373519 | 0.059200959 |
| lysine.pcaac281                   | -0.004165175 | 0.002190654 | 0.059357604 |
| pcaec300.pcaac281                 | -0.007220244 | 0.00379858  | 0.059432052 |
| h1.pcaac281                       | 0.003994423  | 0.002101503 | 0.059435833 |
| pcaec421.pcaec383                 | -0.274643112 | 0.14451441  | 0.059474351 |
| kynurenine.c2                     | 0.10065912   | 0.05296764  | 0.059483065 |
| pcaac363.pcaac380                 | -0.084493269 | 0.044516793 | 0.059798554 |
| pcaac344.c141                     | -0.063239747 | 0.033322585 | 0.059825735 |
| histidine.c5                      | 0.034775517  | 0.018324121 | 0.059826316 |
| lysopcac280.pcaec343              | 0.143995344  | 0.075891449 | 0.059881404 |
| pcaac401.pcaec444                 | 0.237071311  | 0.124953618 | 0.059896189 |
| pcaac365.pcaac323                 | -0.130629198 | 0.068860535 | 0.059931241 |
| pcaac344.smohc221                 | 0.076872179  | 0.040529861 | 0.059975313 |
| pcaec386.pcaac323                 | -0.163955496 | 0.086444874 | 0.059979583 |
| c5.pcaec300                       | 0.023987126  | 0.012648753 | 0.060012296 |
| pcaec401.pcaac343                 | 0.047003646  | 0.024801988 | 0.060178523 |
| pcaac341.c5                       | -0.013523233 | 0.007141016 | 0.060367836 |
| methioninesulfoxide.acetylnithoin | -0.134150298 | 0.070855084 | 0.060426185 |
| pcaac321.pcaec300                 | -0.02748619  | 0.014518516 | 0.060442735 |
| pcaec364.lysopcac180              | 0.109069927  | 0.057611989 | 0.060442822 |
| lysine.pcaac380                   | 0.133730295  | 0.07067087  | 0.060561387 |
| smc161.pcaec361                   | -0.013720443 | 0.007253381 | 0.060656059 |
| pcaec444.methionine               | 0.125796259  | 0.066507826 | 0.060675179 |
| pcaac363.pcaac365                 | -0.063407757 | 0.033530123 | 0.060726576 |
| pcaec406.pcaac385                 | -0.087343592 | 0.046190586 | 0.060743958 |
| pcaac360.pcaec321                 | 0.057090967  | 0.030211991 | 0.060913787 |

|                              |              |             |             |
|------------------------------|--------------|-------------|-------------|
| pcaec423.pcaec364            | 0.014228697  | 0.007532096 | 0.060995286 |
| pcaec300.spermidine          | 0.105972397  | 0.056113532 | 0.061068247 |
| c14.pcaec405                 | -0.062715361 | 0.033212492 | 0.061099229 |
| pcaac404.pcaec403            | 0.102246335  | 0.054192813 | 0.061314954 |
| pcaac422.pcaac281            | 0.005224109  | 0.002769082 | 0.061332471 |
| leucine.pcaac386             | 0.039350819  | 0.020858688 | 0.061338103 |
| c4.pcaac323                  | 0.130250893  | 0.069046224 | 0.061353436 |
| pcaac281.pcaec445            | 0.104079347  | 0.055174001 | 0.061359742 |
| pcaec404.pcaac281            | -0.005151949 | 0.002731393 | 0.06138489  |
| asparagine.c14               | 0.090567758  | 0.048026135 | 0.061438844 |
| acetylmithoine.pcaec444      | -0.126540201 | 0.067104896 | 0.061451631 |
| pcaac383.pcaec422            | 0.028718948  | 0.015232098 | 0.061490297 |
| lysopcac281.pcaac281         | 0.005015702  | 0.002661298 | 0.061591064 |
| smohc221.c141oh              | 0.144409017  | 0.07665031  | 0.061684368 |
| serine.pcaec300              | -0.020358266 | 0.01080726  | 0.061717025 |
| pcaec386.prolinr             | 0.041471366  | 0.02201533  | 0.061718234 |
| pcaec424.pcaac281            | -0.004587237 | 0.002436626 | 0.061872656 |
| lysopcac180.pcaac381         | -0.049009871 | 0.026033691 | 0.061881271 |
| pcaec405.pcaac343            | 0.037744323  | 0.020049712 | 0.061883826 |
| citruline.lysopcac181        | 0.060403324  | 0.032097228 | 0.061972874 |
| pcaec385.pcaac402            | 0.035392234  | 0.018808039 | 0.061989986 |
| isoleucine.pcaac323          | 0.140749392  | 0.074815333 | 0.062054406 |
| c162.alanine                 | 0.057706476  | 0.030675977 | 0.062072073 |
| smohc241.pcaac404            | 0.016633581  | 0.00884341  | 0.062107789 |
| pcaac406.pcaec404            | -0.014365718 | 0.007640291 | 0.06219607  |
| lysopcac160.smohc161         | -0.02413623  | 0.012837367 | 0.062210296 |
| lysine.pcaac344              | 0.113558295  | 0.060420001 | 0.062302696 |
| c8.pcaac365                  | 0.047225758  | 0.025129312 | 0.062326381 |
| pcaec340.transhydroxyproline | -0.042627374 | 0.02268416  | 0.062345699 |
| lysine.smohc221              | 0.105698625  | 0.056281977 | 0.062504092 |
| pcaec385.pcaac384            | -0.164089911 | 0.087391762 | 0.062556933 |
| h1.pcaac365                  | 0.079715228  | 0.042456186 | 0.062563536 |
| pcaec403.pcaac281            | -0.005741859 | 0.003058756 | 0.062618813 |
| pcaac343.transhydroxyproline | 0.029832341  | 0.015896224 | 0.062687066 |
| pcaac380.c5                  | -0.028232394 | 0.015044724 | 0.06270491  |
| pcaac361.smc261              | 0.115250686  | 0.06141755  | 0.062712341 |
| pcaac360.arginine            | -0.083380475 | 0.044457957 | 0.062853507 |
| smohc141.pcaec341            | 0.180063905  | 0.096011439 | 0.062860193 |
| pcaac426.pcaac381            | -0.074007338 | 0.039468935 | 0.062910637 |
| c18.c181                     | 0.017955238  | 0.009575782 | 0.062912105 |
| pcaec383.pcaac281            | -0.004752907 | 0.002535474 | 0.062982005 |
| pcaec362.pcaec322            | -0.140728253 | 0.075073456 | 0.062985166 |
| pcaac343.pcaec383            | -0.112385035 | 0.059960824 | 0.063017506 |
| pcaac364.pcaec342            | -0.181592578 | 0.096896234 | 0.063047285 |
| pcaec321.pcaac240            | -0.0395959   | 0.021132361 | 0.063100624 |

|                                    |              |             |             |
|------------------------------------|--------------|-------------|-------------|
| pcaec363.prolinr                   | 0.028923972  | 0.015445384 | 0.0632464   |
| pcaec422.c141                      | -0.073507676 | 0.039258783 | 0.063284447 |
| pcaac343.pcaec361                  | -0.021510555 | 0.011489257 | 0.063306171 |
| lysopcac170.smohc221               | -0.067225831 | 0.035910226 | 0.063331195 |
| lysopcac181.pcaac281               | 0.003237988  | 0.001729669 | 0.063334755 |
| pcaec322.pcaac404                  | 0.010497951  | 0.005607913 | 0.063340047 |
| smc161.pcaec342                    | -0.200751066 | 0.10724183  | 0.063345856 |
| pcaec444.lysopcac181               | 0.089866775  | 0.048013703 | 0.063381731 |
| pcaac426.smohc222                  | 0.014272647  | 0.007627621 | 0.063453023 |
| serotonin.transhydroxyproline      | -0.050411668 | 0.026945072 | 0.063491337 |
| pcaec342.pcaac402                  | 0.042156257  | 0.022546526 | 0.063653507 |
| lysopcac280.c141                   | -0.03716741  | 0.019885687 | 0.0637504   |
| pcaec382.pcaec444                  | 0.329476034  | 0.176299934 | 0.063780578 |
| pcaec300.c141oh                    | 0.16117777   | 0.086260126 | 0.063826822 |
| putrescine.pcaec404                | 0.026028339  | 0.013936864 | 0.063955587 |
| lysopcac203.pcaec404               | 0.017723492  | 0.00949076  | 0.063975875 |
| pcaec385.c141oh                    | 0.183434331  | 0.098229149 | 0.063980743 |
| pcaac364.histidine                 | 0.076860586  | 0.041162018 | 0.064000818 |
| lysopcac280.pcaac281               | -0.004103976 | 0.002198123 | 0.064033544 |
| pcaac383.pcaec322                  | -0.094061191 | 0.050420227 | 0.064243743 |
| pcaac381.lysopcac160               | 0.058326922  | 0.031270683 | 0.064288585 |
| pcaec380.c5                        | -0.035698309 | 0.019140565 | 0.064312112 |
| histidine.pcaac322                 | 0.086218913  | 0.046238968 | 0.064371831 |
| pcaac341.c0                        | -0.001003454 | 0.000538183 | 0.064388354 |
| c51.c181                           | 0.019426053  | 0.010419174 | 0.064397992 |
| c14.phenylalanine                  | -0.050773999 | 0.027234163 | 0.06441253  |
| lysopcac180.pcaec300               | -0.018699601 | 0.010030896 | 0.064433597 |
| pcaac322.c5                        | -0.020555582 | 0.01102661  | 0.064436562 |
| asymmetricdimethylarginine.pcaac42 | 0.097808271  | 0.052471056 | 0.064455969 |
| phenylalanine.tyrosine             | -0.119653288 | 0.064266574 | 0.064769871 |
| serotonin.pcaac365                 | 0.046531308  | 0.024994689 | 0.064795422 |
| pcaac366.pcaec444                  | 0.144043378  | 0.077402966 | 0.064894025 |
| pcaac321.c51dc                     | -0.15971437  | 0.085886642 | 0.065087622 |
| pcaac421.pcaac402                  | 0.10148593   | 0.054586121 | 0.065145506 |
| c0.pcaec300                        | 0.010803952  | 0.005812229 | 0.065196637 |
| pcaec343.prolinr                   | 0.028639737  | 0.015408176 | 0.065210171 |
| pcaac383.pcaec403                  | 0.077374631  | 0.04163241  | 0.065241193 |
| smohc241.smohc221                  | -0.033446841 | 0.01799939  | 0.065283836 |
| creatinine.asparticacid            | 0.074770887  | 0.040252749 | 0.065381954 |
| pcaac300.glycine                   | 0.060364272  | 0.032505577 | 0.065452326 |
| serine.pcaac402                    | -0.044498293 | 0.023975852 | 0.065607303 |
| c16.lysopcac170                    | 0.076517469  | 0.041250193 | 0.065751373 |
| pcaac321.c51                       | -0.194276467 | 0.104795931 | 0.065910476 |
| pcaec385.pcaac406                  | 0.0770285    | 0.041554549 | 0.065936877 |
| pcaac422.lysopcac170               | -0.041143729 | 0.022196427 | 0.065944436 |



|                         |              |             |             |
|-------------------------|--------------|-------------|-------------|
| putrescine.pcaac341     | 0.01605497   | 0.008661665 | 0.065952086 |
| pcaac342.pcaac240       | -0.023390891 | 0.012619911 | 0.065962967 |
| pcaec403.spermidine     | -0.092359015 | 0.049853836 | 0.066092131 |
| pcaac386.smohc222       | 0.010930824  | 0.005900681 | 0.06611059  |
| pcaac362.lysopcac181    | 0.035323554  | 0.019071614 | 0.066156089 |
| c141oh.c102             | 0.083111961  | 0.044877107 | 0.066179679 |
| smc202.pcaec424         | 0.073409097  | 0.039652794 | 0.066279981 |
| pcaac342.histidine      | 0.076925593  | 0.041557502 | 0.066313725 |
| pcaec383.smohc161       | -0.035541804 | 0.019201471 | 0.066323885 |
| c0.smc261               | -0.061426743 | 0.033197468 | 0.066418034 |
| c3.pcaec404             | -0.016526592 | 0.008932271 | 0.066437268 |
| c51dc.pcaec361          | -0.019353583 | 0.010464928 | 0.066558637 |
| alanine.pcaec405        | 0.056997122  | 0.030828075 | 0.066632042 |
| pcaec365.pcaac362       | -0.050042057 | 0.027066983 | 0.066638984 |
| pcaac420.pcaec444       | 0.190562451  | 0.103082766 | 0.066666254 |
| pcaec363.pcaec424       | -0.067415977 | 0.036471638 | 0.066693318 |
| pcaac402.pcaec382       | -0.06042807  | 0.032694924 | 0.066723781 |
| creatinine.pcaac380     | 0.080092456  | 0.043341333 | 0.066766572 |
| smohc141.smc261         | 0.055686578  | 0.03014449  | 0.066857568 |
| c12.pcaac386            | 0.026368535  | 0.014274729 | 0.06687275  |
| pcaec446.pcaec360       | -0.015761196 | 0.008535886 | 0.066982954 |
| pcaac403.pcaac281       | -0.011278783 | 0.006110447 | 0.067076962 |
| c0.lysopcac182          | 0.116744482  | 0.063256795 | 0.067114294 |
| pcaac341.pcaac425       | -0.110124677 | 0.059686484 | 0.067189252 |
| pcaac381.pcaac403       | -0.014262054 | 0.007729905 | 0.0671897   |
| creatinine.lysopcac160  | 0.017064287  | 0.009250572 | 0.067244702 |
| citruiline.pcaac281     | -0.004335545 | 0.002351652 | 0.067399781 |
| smohc222.pcaec382       | -0.033366445 | 0.018108552 | 0.067552162 |
| c4.pcaac404             | 0.011830906  | 0.006422788 | 0.067634453 |
| lysopcac160.lysopcac181 | 0.104480036  | 0.05672763  | 0.067669248 |
| c51.pcaac402            | -0.043562758 | 0.023657978 | 0.067732319 |
| pcaac322.smohc161       | 0.019289868  | 0.010477248 | 0.067767154 |
| pcaac342.pcaec364       | -0.022187692 | 0.012058146 | 0.06792384  |
| creatinine.smohc241     | 0.119729197  | 0.065107423 | 0.068087988 |
| pcaac343.phenylalanine  | -0.093774719 | 0.051026024 | 0.068260846 |
| pcaac281.smc261         | 0.083596313  | 0.045497256 | 0.068318702 |
| c0.pcaac406             | 0.045811811  | 0.024935304 | 0.068343275 |
| pcaec406.spermidine     | 0.096977348  | 0.052790624 | 0.068374252 |
| smohc221.lysopcac181    | 0.05182429   | 0.028224872 | 0.068507646 |
| c162.c141               | -0.05297384  | 0.028858001 | 0.068574455 |
| lysopcac160.pcaec300    | -0.013956992 | 0.007606841 | 0.068705303 |
| ornithine.pcaec340      | 0.055194226  | 0.030098791 | 0.068858468 |
| pcaec446.pcaac365       | 0.07729405   | 0.042150397 | 0.068858603 |
| methionine.pcaec361     | 0.015779307  | 0.008605337 | 0.068873959 |
| smc202.tyrosine         | -0.117257071 | 0.063967136 | 0.068961039 |

|                       |              |             |             |
|-----------------------|--------------|-------------|-------------|
| pcaec445.pcaec300     | 0.009691396  | 0.005288389 | 0.069036354 |
| pcaec386.pcaec381     | -0.039389257 | 0.021499742 | 0.069111198 |
| pcaec445.pcaec444     | -0.2119112   | 0.115674459 | 0.069128969 |
| smc241.smohc221       | -0.127093101 | 0.069395296 | 0.069207732 |
| pcaac343.c5           | -0.01946295  | 0.010634133 | 0.069388462 |
| pcaac384.smohc221     | 0.047943067  | 0.026195586 | 0.069394108 |
| lysopcac182.c16       | -0.078639469 | 0.042975431 | 0.069443153 |
| asparticacid.pcaec405 | 0.180313206  | 0.098539459 | 0.069445036 |
| pcaec425.arginine     | -0.045531578 | 0.024883669 | 0.069457135 |
| c4.pcaec300           | 0.010797598  | 0.005901839 | 0.069494236 |
| putrescine.spermidine | 0.095312176  | 0.052102159 | 0.069524139 |
| pcaac420.lysopcac203  | -0.042392139 | 0.023182823 | 0.069634389 |
| serotonin.tyrosine    | -0.103365224 | 0.056542938 | 0.069712489 |
| pcaec385.prolinr      | 0.030536857  | 0.016718703 | 0.069950627 |
| leucine.pcaec443      | -0.071543316 | 0.039183452 | 0.070049615 |
| alanine.pcaec404      | -0.040472451 | 0.022170107 | 0.070097209 |
| leucine.smohc161      | -0.019354962 | 0.010603565 | 0.0701299   |
| pcaac405.pcaec340     | 0.123902285  | 0.067886567 | 0.070158587 |
| creatinine.pcaec425   | 0.063730767  | 0.034925745 | 0.070217293 |
| c182.pcaac281         | 0.007555989  | 0.004142007 | 0.070295811 |
| pcaec380.smohc222     | 0.020957781  | 0.011492437 | 0.070389927 |
| pcaec402.smohc221     | -0.083246047 | 0.04564987  | 0.070395727 |
| c181.c102             | 0.065257503  | 0.035806534 | 0.070559395 |
| pcaec363.pcaac404     | 0.006539044  | 0.003588641 | 0.07061312  |
| c4.c14                | -0.068058286 | 0.037356746 | 0.070659401 |
| pcaec362.pcaac380     | -0.092243768 | 0.050634048 | 0.07067067  |
| c18.pcaec443          | 0.082689008  | 0.045394573 | 0.070703048 |
| lysopcac182.pcaec444  | -0.115574646 | 0.0634734   | 0.070813971 |
| pcaec421.pcaec422     | 0.192980052  | 0.10600277  | 0.070862465 |
| c101.pcaec444         | -0.138598263 | 0.076149286 | 0.070928727 |
| putrescine.pcaec444   | -0.133193049 | 0.073236179 | 0.071144643 |
| lysine.alanine        | 0.05159283   | 0.02837068  | 0.071167971 |
| pcaac421.c141oh       | 0.138347269  | 0.076090538 | 0.071219225 |
| pcaec446.pcaac240     | -0.025884997 | 0.014241253 | 0.071309344 |
| pcaec321.pcaec405     | -0.099949485 | 0.054989984 | 0.07131125  |
| methionine.pcaac365   | -0.050966022 | 0.028052065 | 0.071427894 |
| pcaec342.prolinr      | 0.028787062  | 0.015846584 | 0.071462843 |
| lysopcac182.smohc221  | -0.051338932 | 0.02826147  | 0.071469033 |
| pcaac321.pcaac402     | -0.023437299 | 0.012903025 | 0.071492268 |
| lysopcac170.pcaac402  | 0.082701948  | 0.045531495 | 0.071500148 |
| pcaac424.pcaec364     | 0.009967349  | 0.005488309 | 0.071540601 |
| c101.c141             | 0.047723443  | 0.026288124 | 0.071649631 |
| c2.pcaac402           | 0.050774192  | 0.027970867 | 0.07167228  |
| pcaec300.c51dc        | -0.153023497 | 0.084305919 | 0.071696198 |
| pcaac362.smc161       | -0.153199213 | 0.084404912 | 0.071703457 |

|                                    |              |             |             |
|------------------------------------|--------------|-------------|-------------|
| pcaec405.arginine                  | -0.060340112 | 0.033247237 | 0.071728172 |
| pcaec360.lysopcac180               | 0.062557727  | 0.034480637 | 0.071821805 |
| pcaec382.pcaac281                  | -0.006099963 | 0.003362197 | 0.071822888 |
| asymmetricdimethylarginine.transhy | 0.029731698  | 0.016387767 | 0.071825521 |
| pcaec406.smohc161                  | -0.023998598 | 0.013228877 | 0.071849462 |
| glutamine.pcaec363                 | 0.036135746  | 0.019919719 | 0.071855335 |
| pcaac323.spermidine                | 0.092424316  | 0.050949278 | 0.071858968 |
| serine.c0                          | 0.001045057  | 0.000576127 | 0.071875998 |
| c181.pcaac406                      | 0.058101872  | 0.032031171 | 0.071878958 |
| c2.pcaec444                        | -0.097452433 | 0.053725773 | 0.071883671 |
| pcaec446.prolinr                   | 0.030984853  | 0.017082218 | 0.071886794 |
| serine.lysopcac181                 | 0.046773033  | 0.025788511 | 0.071910033 |
| c181.pcaac402                      | 0.030565845  | 0.016853229 | 0.071920375 |
| lysopcac203.pcaec300               | -0.007683411 | 0.004237134 | 0.071966603 |
| c8.c0                              | 0.00133824   | 0.000738123 | 0.072016059 |
| c10.pcaec443                       | 0.093316455  | 0.051482451 | 0.072085007 |
| c141oh.pcaac365                    | 0.04167702   | 0.022998251 | 0.072147978 |
| lysopcac204.c141oh                 | 0.199902655  | 0.110312626 | 0.072153491 |
| pcaec382.pcaec403                  | 0.326429626  | 0.18021075  | 0.072273129 |
| lysine.lysopcac170                 | -0.041605197 | 0.022980715 | 0.07241909  |
| lysopcac182.pcaec340               | 0.070999681  | 0.03922988  | 0.072513079 |
| ornithine.pcaec404                 | -0.059965754 | 0.033133434 | 0.072514747 |
| pcaec362.spermidine                | 0.097037195  | 0.053622406 | 0.072543953 |
| pcaac421.pcaec443                  | 0.068836898  | 0.038047055 | 0.072603589 |
| pcaec406.pcaec361                  | -0.017451895 | 0.009649319 | 0.072704018 |
| pcaec343.arginine                  | -0.071511324 | 0.039539932 | 0.072708597 |
| pcaec383.pcaec405                  | 0.225195288  | 0.12456763  | 0.072828976 |
| lysopcac280.pcaec322               | 0.077658235  | 0.04295699  | 0.072829249 |
| pcaec364.spermidine                | 0.09239357   | 0.05112527  | 0.072925438 |
| pcaac385.pcaec405                  | -0.080245328 | 0.044405936 | 0.072943312 |
| histidine.pcaac281                 | -0.005150447 | 0.002850514 | 0.072980476 |
| pcaec361.pcaac281                  | -0.004228743 | 0.002343893 | 0.073404129 |
| smc161.pcaac404                    | 0.004985133  | 0.002763193 | 0.073409316 |
| pcaac383.pcaac404                  | 0.005629853  | 0.00312056  | 0.073410069 |
| c51dc.pcaec422                     | -0.051808571 | 0.02872238  | 0.073464594 |
| c102.pcaac403                      | -0.006617386 | 0.003669377 | 0.073521639 |
| pcaec342.pcaac384                  | -0.071977327 | 0.039925172 | 0.073616804 |
| serine.pcaac344                    | 0.084580552  | 0.046941279 | 0.073769891 |
| lysopcac182.pcaec363               | 0.026339672  | 0.01461873  | 0.073779658 |
| c10.pcaec444                       | -0.156206844 | 0.086705199 | 0.073809728 |
| asymmetricdimethylarginine.pcaec40 | -0.008549467 | 0.004745565 | 0.07381223  |
| pcaac360.pcaec384                  | -0.160444275 | 0.089066178 | 0.073838304 |
| c18.pcaec444                       | -0.096614489 | 0.053633148 | 0.073839906 |
| arginine.pcaec343                  | 0.108530584  | 0.060262624 | 0.073908805 |
| pcaec402.pcaec300                  | -0.020375395 | 0.011315767 | 0.073962754 |

|                              |              |             |             |
|------------------------------|--------------|-------------|-------------|
| pcaac363.pcaec360            | 0.006155706  | 0.003419898 | 0.074066237 |
| smohc141.pcaec342            | -0.204218338 | 0.113468677 | 0.074096471 |
| pcaec322.pcaec404            | -0.009270453 | 0.005151826 | 0.074148471 |
| pcaec443.pcaac403            | 0.02856975   | 0.015877017 | 0.074149925 |
| c16.pcaac405                 | 0.071442141  | 0.039708469 | 0.074193534 |
| lysopcac203.lysopcac161      | 0.148924304  | 0.082856446 | 0.074478394 |
| pcaac364.pcaec361            | -0.033573231 | 0.018683917 | 0.074553707 |
| lysopcac204.c181             | -0.025076472 | 0.0139573   | 0.074593456 |
| methionine.c0                | 0.000759046  | 0.000422488 | 0.074601054 |
| pcaac385.pcaec364            | -0.037861963 | 0.021074686 | 0.074608656 |
| pcaec401.smohc161            | -0.018665558 | 0.010406148 | 0.075066028 |
| citruiline.smc261            | 0.045205315  | 0.025220098 | 0.075270549 |
| leucine.pcaac380             | 0.11396754   | 0.063627287 | 0.075473194 |
| pcaac385.prolinr             | 0.02814242   | 0.01571328  | 0.075501917 |
| pcaac385.pcaec361            | -0.014511091 | 0.008103183 | 0.075535282 |
| c101.pcaac365                | 0.030470798  | 0.017015388 | 0.075536919 |
| lysopcac170.pcaac405         | -0.106622462 | 0.059542736 | 0.075551586 |
| smc161.c141                  | -0.029364351 | 0.016403295 | 0.075638516 |
| pcaac343.lysopcac161         | 0.116128339  | 0.064889933 | 0.075724058 |
| pcaec420.smohc222            | 0.004803949  | 0.002685085 | 0.075804368 |
| c0.pcaac380                  | 0.116772586  | 0.065310753 | 0.075993951 |
| asparticacid.lysopcac160     | -0.033355563 | 0.018656111 | 0.075999994 |
| pcaac320.smc261              | 0.095849136  | 0.0536493   | 0.076215819 |
| pcaac383.pcaec383            | -0.104131882 | 0.058289589 | 0.076236834 |
| lysopcac161.pcaac281         | 0.004125766  | 0.002310765 | 0.076399998 |
| lysopcac280.pcaec342         | 0.109571985  | 0.061382885 | 0.07646474  |
| lysopcac161.lysine           | 0.146008567  | 0.081795863 | 0.076468247 |
| pcaec385.transhydroxyproline | -0.071490204 | 0.040051669 | 0.076482375 |
| pcaec423.c2                  | 0.081038683  | 0.045403121 | 0.076495269 |
| pcaac404.c51dc               | -0.131556339 | 0.073707913 | 0.076501305 |
| pcaac426.lysopcac181         | 0.046149074  | 0.025858841 | 0.076530603 |
| lysopcac180.pcaac281         | 0.004287688  | 0.002402767 | 0.076559053 |
| pcaec343.c2                  | 0.063525287  | 0.035601935 | 0.076584845 |
| c3.pcaec300                  | 0.007047093  | 0.003951181 | 0.076712253 |
| phenylalanine.smohc221       | 0.072349187  | 0.040569733 | 0.07674689  |
| smc241.arginine              | -0.064668367 | 0.036273522 | 0.076833736 |
| smohc161.smc181              | 0.0520953    | 0.029227927 | 0.076902028 |
| lysopcac204.pcaec340         | 0.106467291  | 0.059756052 | 0.077013786 |
| lysopcac180.spermidine       | -0.096537054 | 0.054191528 | 0.077061997 |
| c181.pcaec300                | 0.010591807  | 0.005945806 | 0.077064233 |
| lysopcac170.pcaec382         | -0.012529076 | 0.00703371  | 0.077080861 |
| pcaec363.pcaec364            | -0.029838886 | 0.016752808 | 0.077107532 |
| c3.lysopcac182               | 0.081842139  | 0.045952501 | 0.077125817 |
| lysine.glycine               | 0.065731889  | 0.036915881 | 0.077196476 |
| pcaec321.pcaac404            | 0.008743049  | 0.004913752 | 0.077407569 |

|                               |              |             |             |
|-------------------------------|--------------|-------------|-------------|
| pcaac281.pcaac404             | 0.006554956  | 0.003684529 | 0.077449346 |
| lysopcac181.pcaec300          | -0.023341273 | 0.013142642 | 0.077953546 |
| c4.c2                         | -0.090382314 | 0.050891188 | 0.077954224 |
| pcaec404.pcaec444             | 0.216149622  | 0.121718197 | 0.077982601 |
| lysopcac180.pcaac386          | -0.032030841 | 0.01803981  | 0.078025003 |
| kynurenine.pcaac385           | 0.041238656  | 0.023230941 | 0.078091877 |
| pcaac322.pcaac365             | -0.062915188 | 0.035462304 | 0.078260869 |
| smc261.pcaec444               | 0.156024538  | 0.087975503 | 0.078367735 |
| smc160.c141                   | -0.03609598  | 0.020358107 | 0.078442255 |
| pcaac341.pcaec322             | -0.081702586 | 0.046081768 | 0.078452303 |
| pcaec365.pcaac365             | 0.058137295  | 0.03280328  | 0.078567282 |
| alphaaminoadipicacid.pcaec300 | 0.009366298  | 0.005286723 | 0.078673493 |
| c16.pcaac281                  | -0.003887894 | 0.002195265 | 0.078778389 |
| leucine.pcaac402              | -0.076295923 | 0.043087175 | 0.07882887  |
| c3.pcaac344                   | 0.071114501  | 0.04016304  | 0.078843671 |
| c10.pcaec300                  | -0.027070642 | 0.015288753 | 0.078847154 |
| histidine.pcaec364            | -0.030344785 | 0.017143728 | 0.078947843 |
| pcaec420.pcaec422             | 0.06309246   | 0.035652865 | 0.079013172 |
| c51.pcaac404                  | 0.003893274  | 0.002200555 | 0.079081564 |
| lysopcac182.smc181            | -0.032306927 | 0.018264021 | 0.079138613 |
| c181.smohc241                 | 0.115244992  | 0.065151828 | 0.079141201 |
| leucine.spermidine            | -0.094627338 | 0.053499538 | 0.079160916 |
| smc160.pcaec361               | -0.018105457 | 0.010237795 | 0.079204321 |
| c4.smohc221                   | 0.042885391  | 0.024266737 | 0.079412898 |
| smohc141.pcaec404             | -0.021473285 | 0.012154116 | 0.079496997 |
| c14.pcaac402                  | 0.026492979  | 0.015000519 | 0.079600136 |
| lysopcac161.lysopcac180       | 0.077255118  | 0.043743067 | 0.079604582 |
| smc161.pcaec363               | -0.063800592 | 0.036141733 | 0.079743244 |
| pcaac361.pcaac403             | 0.009405834  | 0.005328226 | 0.079743973 |
| c102.glycine                  | -0.036302321 | 0.020567356 | 0.079784263 |
| smc260.pcaac281               | 0.004375625  | 0.00248011  | 0.079912466 |
| pcaec342.pcaec361             | -0.012824402 | 0.007270504 | 0.07997876  |
| pcaac300.pcaec300             | -0.01497016  | 0.008489004 | 0.080049452 |
| pcaac384.pcaec300             | 0.012579568  | 0.00713424  | 0.080084997 |
| asparagine.pcaec446           | 0.121321106  | 0.068806433 | 0.080092336 |
| pcaec380.c0                   | -0.001910304 | 0.001083707 | 0.080172609 |
| alphaaminoadipicacid.pcaac343 | 0.04412188   | 0.025032854 | 0.08020489  |
| smc241.c2                     | 0.067009035  | 0.03802656  | 0.080271868 |
| pcaec445.putrescine           | -0.110782015 | 0.062881771 | 0.080341974 |
| c10.pcaec404                  | 0.033815457  | 0.019197788 | 0.080397367 |
| pcaec340.glycine              | 0.076711588  | 0.04356074  | 0.080465132 |
| pcaac383.c5                   | -0.013297912 | 0.007551738 | 0.080485236 |
| pcaec402.c141                 | -0.097163537 | 0.055179557 | 0.080493129 |
| kynurenine.pcaac240           | -0.025015904 | 0.014209037 | 0.080543845 |
| pcaec365.prolinr              | 0.03673062   | 0.020869272 | 0.08063392  |

|                                  |              |             |             |
|----------------------------------|--------------|-------------|-------------|
| pcaec385.pcaec321                | -0.085422803 | 0.048541573 | 0.080676014 |
| alphaaminoadipicacid.lysopcac181 | -0.076500021 | 0.043476413 | 0.080711997 |
| creatinine.pcaac403              | -0.010992419 | 0.006248063 | 0.080753405 |
| pcaac361.leucine                 | 0.043627969  | 0.024809484 | 0.080892008 |
| pcaec383.lysopcac161             | 0.090602012  | 0.051539049 | 0.080992847 |
| arginine.lysopcac160             | -0.019074048 | 0.010853431 | 0.081079755 |
| pcaec365.c2                      | 0.069547435  | 0.039575455 | 0.081094037 |
| c141.pcaec300                    | -0.017250866 | 0.009816563 | 0.081096642 |
| c162.pcaac403                    | -0.012612501 | 0.007178948 | 0.081173525 |
| pcaec342.pcaac404                | 0.006969887  | 0.003967304 | 0.081180529 |
| pcaec300.pcaac404                | 0.006120959  | 0.003484563 | 0.081221473 |
| lysopcac160.pcaec404             | 0.027660934  | 0.015747216 | 0.081227095 |
| pcaec384.pcaec300                | 0.010954092  | 0.006239127 | 0.081373022 |
| pcaec362.prolinr                 | 0.033968929  | 0.019349397 | 0.081399453 |
| pcaec365.pcaec300                | 0.00881011   | 0.005019347 | 0.081455149 |
| pcaac421.arginine                | -0.043349545 | 0.024714421 | 0.081663486 |
| pcaec406.pcaac402                | 0.044228539  | 0.025220598 | 0.081723874 |
| pcaec402.pcaec343                | 0.076086059  | 0.043392738 | 0.081765018 |
| pcaec424.pcaac403                | -0.029130607 | 0.016614351 | 0.081780223 |
| c51.pcaac406                     | 0.062401234  | 0.035621106 | 0.082044977 |
| pcaac383.spermidine              | 0.093297526  | 0.053260398 | 0.082058954 |
| c51dc.smc181                     | -0.028222995 | 0.016111896 | 0.08206542  |
| smc160.pcaac404                  | 0.006360178  | 0.003631345 | 0.082103521 |
| citruiline.pcaac343              | -0.036096916 | 0.020615983 | 0.082198136 |
| pcaec300.lysopcac180             | 0.062663759  | 0.035790004 | 0.082206044 |
| pcaec425.smohc222                | 0.008915957  | 0.005093089 | 0.082253487 |
| methioninesulfoxide.smohc221     | -0.077191901 | 0.044098484 | 0.082280419 |
| smc240.smohc221                  | -0.054939154 | 0.031388969 | 0.082310535 |
| prolinr.pcaec445                 | 0.049050805  | 0.028042361 | 0.082501429 |
| pcaac405.smohc221                | 0.033657831  | 0.019243174 | 0.082516901 |
| lysopcac170.c0                   | 0.005903419  | 0.003375484 | 0.082546193 |
| lysopcac281.pcaec343             | 0.11644843   | 0.066598449 | 0.082614691 |
| c102.pcaec361                    | -0.021482216 | 0.012287824 | 0.082660466 |
| c18.c141oh                       | 0.123211533  | 0.070483138 | 0.08268701  |
| c3.smohc161                      | -0.019217538 | 0.010999073 | 0.082844137 |
| pcaac341.pcaac402                | -0.031907043 | 0.018264469 | 0.082887667 |
| pcaac363.pcaec404                | -0.01445689  | 0.008275837 | 0.082899266 |
| lysine.pcaac406                  | 0.053897811  | 0.030858025 | 0.082941277 |
| pcaac362.pcaec404                | -0.017938443 | 0.010272364 | 0.083003421 |
| pcaec322.prolinr                 | 0.02005273   | 0.011487957 | 0.083132217 |
| pcaec401.transhydroxyproline     | 0.037435069  | 0.021447628 | 0.083154203 |
| pcaec321.pcaec444                | 0.217138053  | 0.124409574 | 0.083166303 |
| pcaec385.smc161                  | -0.081076311 | 0.04646659  | 0.083256834 |
| smohc141.pcaec382                | -0.02505395  | 0.0143591   | 0.083259787 |
| pcaac281.pcaac386                | 0.02097072   | 0.012020883 | 0.083310359 |

|                      |              |             |             |
|----------------------|--------------|-------------|-------------|
| pcaac323.lysopcac181 | 0.051089676  | 0.029292632 | 0.083382189 |
| pcaac343.smohc221    | 0.032429182  | 0.018596528 | 0.083431829 |
| c182.glycine         | -0.045963887 | 0.0263691   | 0.083560329 |
| arginine.pcaac380    | 0.087764902  | 0.050376714 | 0.083722538 |
| pcaec365.pcaac402    | 0.048050182  | 0.027582245 | 0.083740576 |
| c51.pcaec300         | 0.023032525  | 0.013222714 | 0.083771929 |
| smc181.pcaec361      | -0.012691668 | 0.007286155 | 0.083772379 |
| pcaec383.lysopcac170 | -0.047442302 | 0.027241349 | 0.083830977 |
| pcaac344.pcaac384    | -0.240935426 | 0.138387786 | 0.08392563  |
| pcaac361.c5          | -0.01355035  | 0.007784188 | 0.08397198  |
| c5.smohc221          | 0.088829733  | 0.051055357 | 0.084127383 |
| pcaac401.pcaec382    | -0.084450424 | 0.048540097 | 0.084138578 |
| pcaec385.pcaec405    | -0.083566156 | 0.048038171 | 0.084179003 |
| c51.pcaec364         | 0.029239092  | 0.016812052 | 0.084250234 |
| lysine.smohc161      | 0.015053391  | 0.008656223 | 0.08427658  |
| lysopcac180.pcaec381 | 0.072449544  | 0.041662301 | 0.084286109 |
| c51dc.lysopcac170    | 0.013118733  | 0.007544703 | 0.084316286 |
| c16.pcaac402         | 0.043331087  | 0.024928574 | 0.084420681 |
| pcaac362.histidine   | 0.073514744  | 0.042302254 | 0.084485224 |
| pcaec362.pcaec404    | -0.016434402 | 0.009461899 | 0.084651899 |
| methionine.pcaec322  | -0.053627085 | 0.030879079 | 0.084691411 |
| pcaec386.c14         | -0.063465492 | 0.036549346 | 0.084735238 |
| pcaac404.lysopcac160 | -0.032259963 | 0.018580912 | 0.084778633 |
| pcaec444.lysopcac203 | -0.066431939 | 0.038294463 | 0.085031243 |
| creatinine.pcaec382  | -0.009949585 | 0.005738593 | 0.085202837 |
| pcaac365.pcaec364    | 0.039136543  | 0.022578492 | 0.085282492 |
| pcaac380.arginine    | -0.055044929 | 0.031757271 | 0.085292019 |
| kynurenine.pcaec382  | -0.012523762 | 0.007225559 | 0.085299692 |
| smc261.pcaac384      | -0.177936917 | 0.102663044 | 0.085307827 |
| pcaac385.smohc221    | 0.023568367  | 0.013601584 | 0.085387488 |
| pcaac362.leucine     | 0.032422967  | 0.018712893 | 0.085407564 |
| pcaac343.c51dc       | -0.151817813 | 0.08762572  | 0.085422287 |
| pcaec301.pcaec404    | 0.022161676  | 0.012794816 | 0.08550959  |
| pcaac420.c141oh      | 0.158011213  | 0.091281101 | 0.085696047 |
| c102.smohc221        | 0.041362043  | 0.023897294 | 0.085734411 |
| pcaec384.c51dc       | -0.155772488 | 0.090008503 | 0.085767268 |
| smc240.lysopcac160   | 0.047111197  | 0.027226541 | 0.085821191 |
| ornithine.spermidine | -0.093595511 | 0.054129398 | 0.086042553 |
| pcaec424.pcaac402    | 0.091404677  | 0.05287873  | 0.086138678 |
| arginine.pcaec382    | 0.020366914  | 0.011785514 | 0.086217904 |
| pcaac323.c141        | -0.037274278 | 0.021587398 | 0.086481299 |
| c51dc.prolinr        | 0.03701968   | 0.021441246 | 0.086500167 |
| pcaac362.pcaac404    | 0.004597333  | 0.002662905 | 0.086523363 |
| pcaec322.smohc222    | 0.01027353   | 0.005950827 | 0.086529022 |
| pcaec383.pcaac402    | -0.078006427 | 0.045185538 | 0.086537243 |

|                               |              |             |             |
|-------------------------------|--------------|-------------|-------------|
| c12.pcaec300                  | -0.016007352 | 0.009274628 | 0.086614676 |
| pcaac361.lysopcac280          | 0.014442002  | 0.00836875  | 0.086654992 |
| pcaac323.pcaec422             | 0.038207372  | 0.022147316 | 0.086756017 |
| pcaac381.pcaec300             | -0.019178022 | 0.011118388 | 0.086802045 |
| pcaac300.spermidine           | 0.092113592  | 0.053403783 | 0.086809432 |
| pcaec445.pcaec341             | 0.10562647   | 0.06124841  | 0.086862415 |
| putrescine.c14                | 0.075807931  | 0.04395994  | 0.08687707  |
| pcaec362.lysopcac161          | 0.097384374  | 0.056473884 | 0.08688852  |
| pcaec385.pcaec300             | 0.006007859  | 0.003484427 | 0.086926768 |
| pcaec425.pcaec405             | -0.147543925 | 0.085573069 | 0.086929776 |
| pcaac364.smc181               | 0.037355794  | 0.021667619 | 0.086956696 |
| pcaac364.c2                   | 0.089764769  | 0.052077422 | 0.087021662 |
| c8.pcaec300                   | -0.023625509 | 0.013706647 | 0.087026333 |
| smc261.pcaac281               | 0.002137626  | 0.001240713 | 0.087162665 |
| pcaec360.pcaac240             | -0.03110009  | 0.018051177 | 0.087165817 |
| smc241.c181                   | 0.015220949  | 0.008834871 | 0.087176306 |
| arginine.c5                   | 0.024029541  | 0.013950578 | 0.087239876 |
| c142.smc181                   | -0.028383794 | 0.016479005 | 0.08724981  |
| pcaec381.asparticacid         | 0.123030751  | 0.071435084 | 0.087276722 |
| pcaec403.pcaac402             | -0.068608902 | 0.039847822 | 0.087367685 |
| phenylalanine.pcaec445        | 0.102551804  | 0.059564025 | 0.087379665 |
| smc240.pcaac380               | -0.114340299 | 0.06644984  | 0.08756278  |
| pcaec444.smohc221             | -0.097526162 | 0.056679305 | 0.087569108 |
| pcaac383.pcaec445             | 0.075455438  | 0.043881487 | 0.087776662 |
| kynurenine.pcaec361           | -0.009732819 | 0.005661218 | 0.087834793 |
| smohc222.pcaec342             | -0.178826442 | 0.104020294 | 0.087845725 |
| lysopcac160.smohc221          | -0.052490532 | 0.030539361 | 0.087912699 |
| pcaec406.c14                  | -0.065036446 | 0.037843355 | 0.087951665 |
| c18.c2                        | 0.095864286  | 0.055790794 | 0.088004384 |
| pcaac380.pcaac406             | 0.088955048  | 0.051776472 | 0.088045019 |
| smohc222.pcaec300             | 0.020459362  | 0.011908701 | 0.088052595 |
| pcaec385.arginine             | -0.071478307 | 0.041606668 | 0.088064439 |
| alphaaminoadipicacid.pcaec404 | -0.019645496 | 0.011436192 | 0.088085997 |
| c182.pcaac403                 | -0.008030917 | 0.004676589 | 0.088191453 |
| pcaec362.pcaec342             | -0.19286499  | 0.112319464 | 0.08821866  |
| alanine.pcaac365              | -0.095480085 | 0.055610528 | 0.08824953  |
| pcaec364.pcaec300             | 0.012269634  | 0.007146447 | 0.088259906 |
| c16.pcaec404                  | 0.050676722  | 0.029523747 | 0.0883356   |
| lysopcac180.pcaec403          | 0.08899481   | 0.051849308 | 0.088346708 |
| pcaac320.kynurenine           | -0.020785098 | 0.012109856 | 0.088352956 |
| pcaac320.c2                   | 0.065086498  | 0.037933331 | 0.088456818 |
| asparagine.pcaec322           | -0.058411509 | 0.034054228 | 0.088560272 |
| pcaac360.pcaec443             | 0.098799102  | 0.057601576 | 0.088566631 |
| kynurenine.prolinr            | 0.024972698  | 0.014565278 | 0.088691536 |
| pcaac421.lysopcac203          | -0.037401325 | 0.021823273 | 0.088822075 |



|                                    |              |             |             |
|------------------------------------|--------------|-------------|-------------|
| pcaac366.pcaec364                  | 0.015494996  | 0.009042442 | 0.088866703 |
| pcaec386.pcaec300                  | 0.008860058  | 0.005170642 | 0.088876615 |
| c18.pcaec405                       | -0.073264403 | 0.042756664 | 0.088878735 |
| asymmetricdimethylarginine.pcaac34 | 0.003669103  | 0.002141315 | 0.088885947 |
| pcaac426.c141                      | -0.056343441 | 0.03288261  | 0.088887548 |
| alanine.pcaac322                   | 0.085554071  | 0.049931288 | 0.088894217 |
| kynurenine.pcaec360                | 0.006087937  | 0.003553513 | 0.088934785 |
| pcaac424.smohc222                  | -0.03792215  | 0.022143032 | 0.089048549 |
| pcaac384.spermidine                | 0.089359739  | 0.052178374 | 0.089051848 |
| pcaac404.lysopcac180               | 0.090691707  | 0.05299083  | 0.089259145 |
| pcaec386.pcaac404                  | 0.021372947  | 0.012492136 | 0.089360628 |
| pcaec361.c141                      | -0.048393623 | 0.028289946 | 0.089412939 |
| lysine.c2                          | -0.07640632  | 0.04467257  | 0.089462337 |
| serotonin.pcaac386                 | 0.037349286  | 0.021838824 | 0.089488099 |
| pcaac424.pcaac281                  | -0.007070074 | 0.004134242 | 0.089506318 |
| lysopcac180.pcaac402               | 0.094154064  | 0.055058315 | 0.089515045 |
| pcaec341.pcaac384                  | -0.0629068   | 0.036793295 | 0.089578763 |
| c101.prolinr                       | 0.052177724  | 0.030530799 | 0.089711728 |
| lysopcac161.smohc221               | 0.129322523  | 0.07567359  | 0.089724251 |
| c16.c18                            | 0.14954117   | 0.087506529 | 0.08973121  |
| h1.pcaec401                        | 0.099315258  | 0.058136098 | 0.089841081 |
| pcaac380.pcaec364                  | 0.024926293  | 0.014593185 | 0.0898868   |
| prolinr.phenylalanine              | -0.086356519 | 0.050578864 | 0.090019725 |
| lysopcac203.pcaec383               | -0.159955341 | 0.093687722 | 0.09002704  |
| pcaac361.smohc222                  | 0.014993958  | 0.00878317  | 0.090064422 |
| pcaac361.pcaac281                  | 0.004712791  | 0.002760841 | 0.090085119 |
| pcaec404.spermidine                | -0.085979095 | 0.050371804 | 0.090108143 |
| c162.pcaec360                      | -0.013597621 | 0.007966389 | 0.090111015 |
| asymmetricdimethylarginine.c181    | 0.020220899  | 0.011853422 | 0.090290447 |
| pcaac403.lysopcac170               | -0.106932126 | 0.062685508 | 0.090301939 |
| pcaec362.pcaec384                  | -0.100651532 | 0.05900376  | 0.090302199 |
| pcaac426.pcaac281                  | 0.004857802  | 0.002847899 | 0.090320906 |
| pcaac386.pcaec405                  | -0.101710393 | 0.059630992 | 0.090336973 |
| c181.pcaac281                      | 0.013585197  | 0.007965239 | 0.090356175 |
| pcaac320.smohc222                  | 0.005356116  | 0.00314044  | 0.090361777 |
| pcaac363.prolinr                   | 0.029324877  | 0.017198115 | 0.09043823  |
| pcaac403.smohc221                  | -0.090581396 | 0.053138004 | 0.090527514 |
| c0.pcaac405                        | 0.046718986  | 0.027413039 | 0.090599185 |
| c5.pcaec404                        | -0.042332208 | 0.024841523 | 0.090631173 |
| pcaac383.lysopcac180               | 0.083729014  | 0.04914739  | 0.090717337 |
| pcaec406.pcaec404                  | -0.013826885 | 0.00811848  | 0.090809946 |
| pcaac405.c141                      | -0.056091758 | 0.032936437 | 0.090829943 |
| pcaac281.pcaec361                  | -0.015763368 | 0.009260854 | 0.0909952   |
| smc202.pcaac281                    | 0.00201578   | 0.001184436 | 0.091044273 |
| glutamicacid.pcaac380              | 0.107485031  | 0.063164882 | 0.091087808 |

|                                      |              |             |             |
|--------------------------------------|--------------|-------------|-------------|
| isoleucine.pcaec445                  | 0.050807024  | 0.029860104 | 0.091117179 |
| pcaec446.transhydroxyproline         | -0.059082219 | 0.034724704 | 0.091127652 |
| pcaac281.pcaec404                    | -0.020860739 | 0.012266522 | 0.091282516 |
| pcaac323.smohc221                    | 0.010228447  | 0.006015326 | 0.09132513  |
| pcaec446.pcaec300                    | 0.006471987  | 0.003806215 | 0.091329715 |
| c181.glycine                         | -0.047795695 | 0.028109549 | 0.091336648 |
| asparagine.pcaac405                  | -0.167570697 | 0.09856628  | 0.091384769 |
| alanine.pcaac425                     | -0.092584072 | 0.054477583 | 0.091496477 |
| c12.pcaec380                         | -0.057401088 | 0.033785119 | 0.091587937 |
| alanine.pcaec360                     | 0.007209549  | 0.004243857 | 0.091622881 |
| asymmetricdimethylarginine.valine    | 0.078231894  | 0.046052647 | 0.091636302 |
| lysopcac140.c51dc                    | -0.166175601 | 0.097874415 | 0.091807299 |
| pcaac386.smohc161                    | -0.021238428 | 0.012512466 | 0.091895107 |
| c3.smohc221                          | 0.027790623  | 0.016374364 | 0.091928888 |
| pcaec342.pcaec422                    | 0.049682631  | 0.029282269 | 0.092028139 |
| methioninesulfoxide.pcaac281         | -0.005806716 | 0.003424695 | 0.092244054 |
| c162.smohc222                        | -0.006833771 | 0.004033917 | 0.092522656 |
| pcaec445.pcaac365                    | 0.06921233   | 0.040865575 | 0.092602617 |
| smc161.c0                            | -0.001652467 | 0.000975842 | 0.092656758 |
| pcaac406.c18                         | -0.050488387 | 0.029818869 | 0.092695958 |
| c0.smohc221                          | 0.039057316  | 0.023070537 | 0.092737349 |
| ornithine.methionine                 | -0.048385511 | 0.028584574 | 0.092782799 |
| phenylalanine.pcaac402               | -0.049588553 | 0.029296094 | 0.092791652 |
| pcaec424.c2                          | 0.090713491  | 0.05359962  | 0.092837461 |
| lysopcac280.pcaec300                 | -0.008693578 | 0.005137994 | 0.092915797 |
| acetylmethionine.transhydroxyproline | -0.01397843  | 0.008261929 | 0.092936658 |
| smc202.smohc221                      | 0.017025616  | 0.010068772 | 0.093123442 |
| smc261.pcaac322                      | 0.0839801    | 0.049685417 | 0.093256857 |
| smc261.smc160                        | -0.119292926 | 0.07058014  | 0.093268252 |
| pcaec364.prolinr                     | 0.041279552  | 0.024423402 | 0.09327075  |
| smohc222.lysopcac181                 | 0.061721995  | 0.036520404 | 0.093288993 |
| kynurenine.pcaec404                  | -0.012039746 | 0.007124996 | 0.093342503 |
| pcaac364.pcaec364                    | -0.026393187 | 0.015619471 | 0.093347855 |
| c16.citruline                        | 0.054724318  | 0.032387131 | 0.093361035 |
| pcaac420.arginine                    | -0.043341142 | 0.025655548 | 0.093427363 |
| smc202.c51                           | -0.131588653 | 0.077905304 | 0.093477886 |
| c51dc.pcaec300                       | 0.007820269  | 0.004629893 | 0.093478377 |
| c5.pcaec361                          | -0.035283438 | 0.020901892 | 0.093676811 |
| pcaec360.pcaac403                    | -0.024856282 | 0.014725757 | 0.09369682  |
| pcaac383.arginine                    | 0.064329811  | 0.038115375 | 0.093731583 |
| pcaec361.pcaac402                    | -0.094259306 | 0.05585875  | 0.093790734 |
| c182.pcaec444                        | -0.095001455 | 0.056327362 | 0.093957096 |
| smohc161.smc261                      | 0.067939551  | 0.040283801 | 0.093971042 |
| c101.pcaac403                        | -0.004722048 | 0.002800534 | 0.094047989 |
| c18.pcaac402                         | 0.030415762  | 0.018039631 | 0.094061833 |

|                              |              |             |             |
|------------------------------|--------------|-------------|-------------|
| pcaec446.arginine            | -0.047443495 | 0.028139735 | 0.09407263  |
| c162.smc202                  | -0.056784623 | 0.033701876 | 0.094282631 |
| pcaac386.pcaec342            | -0.132465528 | 0.078619677 | 0.094286418 |
| pcaac425.lysopcac180         | 0.094137377  | 0.055875055 | 0.09430705  |
| pcaec406.pcaec300            | 0.008381888  | 0.004976792 | 0.094420972 |
| pcaac364.pcaec300            | 0.024601766  | 0.014616616 | 0.094626081 |
| pcaec381.spermidine          | -0.085095603 | 0.050577554 | 0.094754052 |
| lysopcac170.c141oh           | 0.119084605  | 0.070779396 | 0.094754453 |
| glycine.lysopcac203          | -0.048392935 | 0.028769747 | 0.094831854 |
| pcaac381.pcaec444            | 0.176767799  | 0.105101785 | 0.094871644 |
| smc181.pcaec300              | 0.005554828  | 0.003303782 | 0.094972462 |
| phenylalanine.smohc222       | -0.007481728 | 0.004450314 | 0.095008558 |
| acetylmithoine.arginine      | 0.026296437  | 0.015644758 | 0.095071273 |
| glutamicacid.pcaec342        | 0.150675031  | 0.089668072 | 0.095165209 |
| pcaac320.pcaac365            | -0.082547978 | 0.049130067 | 0.095198671 |
| putrescine.lysopcac160       | 0.025602891  | 0.015239501 | 0.095229453 |
| pcaec381.pcaec382            | -0.043278208 | 0.025764509 | 0.095282926 |
| asparticacid.pcaac403        | 0.04226337   | 0.025164304 | 0.095334401 |
| pcaac342.pcaac365            | -0.066909222 | 0.039840622 | 0.095348993 |
| pcaec405.pcaec404            | -0.045308354 | 0.026982002 | 0.095391075 |
| pcaac363.pcaac404            | 0.005237262  | 0.003119319 | 0.095436061 |
| pcaec362.pcaac384            | -0.049400104 | 0.029442474 | 0.095655947 |
| methionine.glycine           | 0.104975115  | 0.062589913 | 0.095785706 |
| pcaec384.smohc222            | 0.009055228  | 0.005399322 | 0.09580222  |
| c51dc.spermidine             | 0.092805991  | 0.055348549 | 0.095870648 |
| pcaac364.smohc221            | 0.075111021  | 0.044796648 | 0.095879449 |
| serotonin.lysopcac181        | -0.059432102 | 0.035456147 | 0.095976824 |
| smohc141.pcaec300            | 0.012591654  | 0.00751237  | 0.095994806 |
| pcaac385.histidine           | 0.073362699  | 0.043789301 | 0.096145252 |
| pcaac422.transhydroxyproline | 0.049680551  | 0.029665001 | 0.096270569 |
| histidine.c162               | -0.139353034 | 0.083232926 | 0.096362214 |
| methionine.pcaac360          | -0.105643757 | 0.063120567 | 0.096474822 |
| pcaec420.pcaac323            | -0.148836343 | 0.088972076 | 0.096640209 |
| isoleucine.c162              | -0.119734164 | 0.071579156 | 0.096658268 |
| pcaac380.c141                | -0.040477143 | 0.024200704 | 0.09669603  |
| smc202.pcaec445              | 0.041606271  | 0.024889787 | 0.09688183  |
| pcaec403.pcaec382            | 0.081910941  | 0.049001526 | 0.096885856 |
| pcaec384.pcaac344            | 0.103009633  | 0.061623972 | 0.096889022 |
| pcaac342.pcaec404            | -0.020006311 | 0.01197078  | 0.096952667 |
| pcaec364.pcaac402            | 0.035758081  | 0.021399955 | 0.09701603  |
| smc202.lysopcac181           | 0.090045156  | 0.053926621 | 0.097247861 |
| pcaec381.pcaec380            | 0.119942989  | 0.071832143 | 0.097248703 |
| pcaac386.prolinr             | 0.037383548  | 0.022391636 | 0.097295499 |
| pcaec384.kynurenine          | -0.028648389 | 0.017160685 | 0.097317692 |
| c12.smc202                   | -0.063800229 | 0.038227019 | 0.097404519 |

|                              |              |             |             |
|------------------------------|--------------|-------------|-------------|
| pcaac364.lysopcac160         | 0.112433737  | 0.067381772 | 0.097479015 |
| c51.pcaac403                 | 0.010703831  | 0.006415826 | 0.097530603 |
| pcaac424.pcaec380            | 0.097761995  | 0.058598146 | 0.097530968 |
| pcaac363.pcaec363            | 0.058080821  | 0.034820638 | 0.097599835 |
| pcaac386.pcaac323            | -0.102747042 | 0.061609742 | 0.097657977 |
| pcaec343.lysopcac181         | 0.08617886   | 0.051684647 | 0.097719697 |
| pcaec321.c5                  | -0.008526151 | 0.00511491  | 0.097814644 |
| pcaac381.pcaac323            | -0.119443859 | 0.071672709 | 0.09789498  |
| pcaec321.smohc222            | 0.004860348  | 0.002916627 | 0.097912979 |
| pcaac406.pcaac381            | -0.022604003 | 0.01356645  | 0.097964526 |
| pcaac363.pcaec361            | -0.016141222 | 0.009690784 | 0.098073002 |
| pcaec384.pcaac425            | 0.098444277  | 0.059110272 | 0.098111266 |
| pcaec362.pcaec382            | -0.017904801 | 0.010751465 | 0.098130918 |
| smc180.c141oh                | 0.118610594  | 0.071253785 | 0.098273714 |
| pcaec444.c3                  | -0.040264887 | 0.02418892  | 0.098277966 |
| pcaac322.pcaac300            | -0.137510768 | 0.082612183 | 0.098291299 |
| pcaac366.pcaac281            | -0.005092914 | 0.003060094 | 0.098338067 |
| pcaec365.lysopcac180         | 0.099059921  | 0.059538878 | 0.098441087 |
| c182.pcaec300                | 0.005327886  | 0.003202292 | 0.098443663 |
| pcaec381.smohc221            | -0.056941703 | 0.034226652 | 0.098465114 |
| smc202.pcaec300              | 0.004029165  | 0.00242201  | 0.098485759 |
| pcaec420.pcaec405            | -0.112749671 | 0.067782657 | 0.09851833  |
| pcaac420.pcaec300            | 0.016515408  | 0.009929951 | 0.09856017  |
| smc161.c51dc                 | -0.138037218 | 0.083003803 | 0.098593955 |
| pcaac363.smohc221            | 0.024004604  | 0.014436404 | 0.098642096 |
| pcaac322.smc261              | 0.067514726  | 0.040603742 | 0.098644458 |
| pcaac281.histidine           | 0.079944506  | 0.048087461 | 0.098702602 |
| pcaac385.pcaec300            | 0.005713728  | 0.003437956 | 0.098808302 |
| pcaec301.pcaac300            | -0.119676859 | 0.072028037 | 0.098893393 |
| pcaac363.histidine           | 0.078913974  | 0.047495073 | 0.098895893 |
| leucine.c162                 | -0.132580405 | 0.079811925 | 0.098968055 |
| c141.pcaac365                | 0.041603073  | 0.025045804 | 0.098984302 |
| alanine.pcaac386             | 0.04728976   | 0.028474242 | 0.099042412 |
| pcaec360.pcaec405            | -0.121661611 | 0.073263856 | 0.099081789 |
| pcaec321.pcaec300            | 0.006610871  | 0.003981567 | 0.09912734  |
| pcaac420.pcaac323            | -0.125325491 | 0.075482287 | 0.099135249 |
| pcaac425.kynurenine          | -0.022821526 | 0.013745642 | 0.099146583 |
| acetylmithoine.lysopcac204   | 0.072393451  | 0.043606493 | 0.099170871 |
| pcaac322.pcaac281            | -0.005773087 | 0.003477928 | 0.099217578 |
| lysopcac181.tyrosine         | -0.065887343 | 0.039695091 | 0.099234754 |
| methioninesulfoxide.pcaec404 | 0.040053114  | 0.024132754 | 0.099262334 |
| c3.pcaac281                  | -0.007392764 | 0.004454464 | 0.099276211 |
| c141.pcaec322                | -0.070586774 | 0.042531752 | 0.099277238 |
| pcaec402.c0                  | -0.000887397 | 0.000534949 | 0.099434817 |
| smc241.smc161                | 0.149100666  | 0.089933955 | 0.099627579 |

|                                    |              |             |             |
|------------------------------------|--------------|-------------|-------------|
| pcaec385.pcaac323                  | -0.122331903 | 0.073810014 | 0.099729093 |
| pcaac342.pcaec383                  | -0.078891871 | 0.047608049 | 0.099785165 |
| c51dc.c0                           | -0.001781123 | 0.001075069 | 0.099857909 |
| pcaac405.pcaac341                  | 0.008162719  | 0.004927186 | 0.099874783 |
| smohc141.pcaac281                  | 0.025479583  | 0.015380269 | 0.099880608 |
| c142.pcaac365                      | 0.04591141   | 0.027718344 | 0.099938618 |
| pcaac342.pcaec403                  | 0.088578671  | 0.053487086 | 0.099995176 |
| serotonin.lysopcac170              | 0.019629492  | 0.011858217 | 0.100142629 |
| asymmetricdimethylarginine.pcaec38 | -0.01144608  | 0.006914764 | 0.100150585 |
| pcaec360.c2                        | 0.084312046  | 0.05093659  | 0.100165791 |
| pcaac384.lysopcac181               | 0.061419498  | 0.037107198 | 0.100174814 |
| isoleucine.smohc161                | -0.022406175 | 0.013539199 | 0.100231601 |
| c5.pcaac323                        | 0.183867758  | 0.111197248 | 0.100513103 |
| pcaac342.pcaec361                  | -0.014715808 | 0.008899682 | 0.100514595 |
| smc202.c141                        | -0.0578594   | 0.03503062  | 0.10088995  |
| pcaac240.pcaac426                  | 0.109593329  | 0.066364151 | 0.100948641 |
| pcaec340.c5                        | -0.011610901 | 0.007031792 | 0.100988022 |
| pcaac420.transhydroxyproline       | -0.078699202 | 0.047670449 | 0.101049318 |
| c51.pcaac343                       | 0.029858042  | 0.018086197 | 0.101054774 |
| c141oh.lysopcac204                 | 0.03433863   | 0.020801311 | 0.101071738 |
| c51dc.smohc221                     | 0.031571363  | 0.019130176 | 0.101163443 |
| c51.pcaac386                       | -0.017591349 | 0.010660817 | 0.101214579 |
| pcaac323.pcaec364                  | -0.025314357 | 0.015343619 | 0.10126873  |
| pcaac364.pcaec383                  | -0.090293823 | 0.054740037 | 0.101335799 |
| pcaac281.smohc161                  | -0.045180337 | 0.027392269 | 0.101360325 |
| c51dc.pcaec340                     | 0.055933599  | 0.033916831 | 0.101410159 |
| glycine.smohc221                   | -0.086650754 | 0.052545302 | 0.101424992 |
| pcaec341.transhydroxyproline       | -0.030224807 | 0.018332153 | 0.101493862 |
| pcaac363.pcaec445                  | 0.08384442   | 0.050861218 | 0.10154271  |
| c51dc.pcaac426                     | 0.083710612  | 0.05078594  | 0.101581992 |
| pcaac363.c162                      | -0.090350663 | 0.054815538 | 0.101589292 |
| smc260.c141                        | -0.024787098 | 0.015040856 | 0.10164742  |
| c142.lysopcac204                   | 0.031577465  | 0.019162389 | 0.101667324 |
| pcaac365.lysopcac180               | 0.082171275  | 0.049869641 | 0.101701511 |
| pcaac323.pcaec361                  | -0.006643666 | 0.004032704 | 0.101757953 |
| pcaac381.c141oh                    | 0.118369648  | 0.071856548 | 0.101787178 |
| asparagine.pcaec422                | 0.037716938  | 0.022898465 | 0.10182149  |
| pcaac343.lysopcac180               | 0.090962666  | 0.055224857 | 0.101822635 |
| pcaec401.pcaac381                  | -0.088643254 | 0.053818628 | 0.101834746 |
| serotonin.pcaec322                 | 0.07632894   | 0.046354741 | 0.101926888 |
| smc161.pcaec360                    | -0.007754291 | 0.004710322 | 0.102007761 |
| c181.pcaec424                      | -0.052000743 | 0.031589967 | 0.102032123 |
| pcaec340.smc241                    | 0.167040884  | 0.101496931 | 0.10210286  |
| c18.pcaec364                       | -0.028028797 | 0.017034017 | 0.102167364 |
| pcaec321.pcaec404                  | -0.013092538 | 0.007960702 | 0.102335483 |

|                                |              |             |             |
|--------------------------------|--------------|-------------|-------------|
| c51dc.lysopcac280              | -0.012943881 | 0.007870803 | 0.102356627 |
| lysopcac203.c181               | 0.028101442  | 0.017089549 | 0.102393774 |
| prolinr.c162                   | -0.133050021 | 0.08091554  | 0.102405508 |
| c14.smohc222                   | -0.017766104 | 0.010806981 | 0.102480062 |
| pcaec341.lysopcac181           | 0.045256698  | 0.027531326 | 0.102505187 |
| pcaac342.smc161                | -0.104677685 | 0.06368384  | 0.102529361 |
| c141.pcaec380                  | -0.066773146 | 0.040624454 | 0.10253764  |
| pcaec340.pcaac402              | -0.074391571 | 0.045278509 | 0.102680809 |
| c182.pcaac402                  | 0.025754157  | 0.015675542 | 0.102686168 |
| pcaec385.smohc221              | 0.023608547  | 0.014370882 | 0.102716698 |
| pcaac360.pcaac323              | -0.13893672  | 0.084612575 | 0.102876484 |
| c182.pcaec380                  | -0.059744412 | 0.036384513 | 0.102877594 |
| pcaac362.prolinr               | 0.035438431  | 0.021589864 | 0.10300016  |
| pcaec365.c14                   | -0.053167175 | 0.032400056 | 0.1030997   |
| pcaac406.c5                    | -0.012822761 | 0.007817718 | 0.103253949 |
| c141.phenylalanine             | -0.074578137 | 0.045470513 | 0.103269576 |
| asymmetricdimethylarginine.c18 | -0.035195931 | 0.021460541 | 0.103293063 |
| lysopcac182.lysopcac180        | -0.128963506 | 0.078654821 | 0.103379823 |
| pcaac425.pcaac404              | -0.014497478 | 0.008842155 | 0.10338545  |
| pcaac323.pcaac343              | 0.03022648   | 0.018440398 | 0.103477545 |
| pcaec321.pcaec342              | -0.182432366 | 0.111308957 | 0.103513367 |
| smc161.pcaec382                | -0.020150249 | 0.012296885 | 0.103581424 |
| pcaec423.lysopcac181           | 0.101803779  | 0.062138606 | 0.10364674  |
| c8.c51dc                       | 0.147532974  | 0.090087288 | 0.103786052 |
| pcaac322.transhydroxyproline   | 0.02791549   | 0.017046974 | 0.103807814 |
| lysopcac170.pcaec300           | -0.015502625 | 0.009467253 | 0.103820995 |
| pcaec322.pcaec300              | 0.003870205  | 0.002363823 | 0.103870045 |
| leucine.pcaec445               | 0.052212529  | 0.031893202 | 0.10390351  |
| pcaec321.kynurenine            | -0.013145984 | 0.008033138 | 0.104036601 |
| c8.c141                        | 0.067121673  | 0.041018358 | 0.104055062 |
| pcaec341.smc241                | 0.22918252   | 0.140062383 | 0.104074415 |
| pcaec365.c18                   | -0.053606991 | 0.032766114 | 0.104124524 |
| pcaec341.histidine             | 0.069230152  | 0.042327793 | 0.104224688 |
| c51dc.lysopcac181              | -0.10319923  | 0.063115748 | 0.104328129 |
| lysine.smohc222                | -0.007368171 | 0.004507688 | 0.104433162 |
| smc161.smohc161                | -0.076029324 | 0.046531565 | 0.10456949  |
| pcaac401.pcaec321              | 0.067239929  | 0.041158011 | 0.104617446 |
| pcaac405.pcaec403              | 0.112956439  | 0.069168282 | 0.10475111  |
| pcaec383.c181                  | 0.052599225  | 0.032209299 | 0.104755816 |
| lysopcac170.smc261             | 0.048075294  | 0.029442244 | 0.104793049 |
| pcaec443.pcaec381              | 0.233067913  | 0.142743864 | 0.104813647 |
| alanine.pcaec322               | -0.057242483 | 0.035060187 | 0.104830132 |
| c12.lysopcac204                | 0.029640739  | 0.018156745 | 0.104872282 |
| pcaec401.smc261                | 0.052940921  | 0.032452497 | 0.105116171 |
| acetylmethionine.lysopcac203   | -0.031979312 | 0.019605775 | 0.105162404 |

|                                    |              |             |             |
|------------------------------------|--------------|-------------|-------------|
| pcaac404.methionine                | -0.060533085 | 0.037112265 | 0.105170131 |
| c101.smohc221                      | 0.059245847  | 0.036332645 | 0.105260962 |
| smc241.smc240                      | -0.098867262 | 0.060647081 | 0.105354877 |
| pcaac362.pcaac281                  | 0.002530931  | 0.001552607 | 0.105373703 |
| pcaec340.pcaec300                  | -0.044118188 | 0.027069804 | 0.105442283 |
| ornithine.pcaac406                 | 0.039640651  | 0.024322923 | 0.105448272 |
| smc260.pcaac404                    | 0.004108608  | 0.002521344 | 0.105497826 |
| pcaac323.pcaac384                  | -0.100777703 | 0.061849623 | 0.105525839 |
| pcaec444.pcaac281                  | -0.003003487 | 0.001843352 | 0.105533746 |
| pcaec363.pcaec322                  | -0.101413411 | 0.062241414 | 0.105534947 |
| glycine.c14                        | 0.056831421  | 0.034880624 | 0.105544223 |
| pcaac406.smc160                    | -0.076227614 | 0.04679549  | 0.105620491 |
| pcaec443.pcaec380                  | 0.131620529  | 0.080848994 | 0.10582677  |
| c51dc.lysopcac182                  | 0.057249839  | 0.035168636 | 0.105850863 |
| ornithine.pcaec321                 | -0.082599546 | 0.050741797 | 0.105856377 |
| pcaac343.smohc161                  | 0.03076077   | 0.018903588 | 0.105982855 |
| phenylalanine.c162                 | -0.112430885 | 0.069098306 | 0.106010521 |
| acetylmethionine.c141oh            | 0.119494832  | 0.073442095 | 0.106021803 |
| ornithine.pcaac281                 | 0.005372413  | 0.003302277 | 0.106060254 |
| alphaaminoadipicacid.lysopcac280   | -0.011197527 | 0.006883262 | 0.10608258  |
| c4.lysopcac161                     | -0.1031545   | 0.063412828 | 0.106095908 |
| smc160.spermidine                  | 0.083422545  | 0.051291844 | 0.106156422 |
| smc161.lysopcac181                 | 0.054794869  | 0.033691178 | 0.106165532 |
| pcaac401.pcaac403                  | -0.11380926  | 0.069983754 | 0.106200076 |
| pcaec406.pcaac323                  | -0.131296242 | 0.080748749 | 0.106251006 |
| pcaac380.pcaec300                  | 0.009877249  | 0.006075359 | 0.106292792 |
| pcaec403.pcaac404                  | -0.022562771 | 0.013880824 | 0.106362133 |
| pcaac425.pcaac403                  | -0.026942016 | 0.016586768 | 0.106608702 |
| asymmetricdimethylarginine.lysopca | 0.030019192  | 0.018481657 | 0.106616857 |
| pcaac421.pcaec361                  | -0.025784997 | 0.015875385 | 0.106629066 |
| lysopcac203.smohc221               | -0.028353091 | 0.017459029 | 0.106678999 |
| pcaac281.pcaac402                  | -0.061823106 | 0.038071236 | 0.106700147 |
| pcaec381.pcaac402                  | -0.064926841 | 0.039993695 | 0.106796951 |
| phenylalanine.lysopcac160          | -0.090928491 | 0.056016383 | 0.10683518  |
| pcaac300.kynurenine                | -0.014363797 | 0.008850906 | 0.106917892 |
| smc161.c181                        | 0.012789069  | 0.0078841   | 0.107073683 |
| c142.pcaec443                      | 0.102139802  | 0.062976821 | 0.107131753 |
| methionine.c162                    | -0.106289618 | 0.065555609 | 0.107238504 |
| pcaac421.pcaac323                  | -0.149007277 | 0.091913949 | 0.107282517 |
| kynurenine.phenylalanine           | 0.089350663  | 0.055143926 | 0.107463639 |
| spermidine.lysopcac181             | -0.251094049 | 0.154995787 | 0.107530667 |
| methionine.pcaac323                | 0.148274325  | 0.09153109  | 0.107546071 |
| citruline.alanine                  | -0.026260146 | 0.016213802 | 0.107614297 |
| asparagine.pcaec444                | -0.083634281 | 0.051645156 | 0.107660488 |
| lysopcac170.pcaac425               | 0.096595584  | 0.059652567 | 0.107681837 |

|                                    |              |             |             |
|------------------------------------|--------------|-------------|-------------|
| methioninesulfoxide.pcaac405       | -0.194303553 | 0.120008618 | 0.10772987  |
| pcaec383.pcaec343                  | 0.105888994  | 0.065422637 | 0.107846747 |
| pcaac422.c0                        | -0.001045923 | 0.000646243 | 0.107862028 |
| pcaac360.pcaac343                  | 0.060519863  | 0.03739618  | 0.107888586 |
| asparagine.smc181                  | 0.036765906  | 0.022721771 | 0.10794292  |
| lysopcac140.pcaac364               | 0.081885461  | 0.050610847 | 0.107974979 |
| pcaec385.pcaac404                  | 0.018588354  | 0.01148922  | 0.107985258 |
| c16.pcaec382                       | -0.019882483 | 0.012289367 | 0.107992731 |
| pcaac344.c162                      | -0.082646446 | 0.051084947 | 0.108000671 |
| c12.pcaec443                       | 0.099597188  | 0.061567147 | 0.108027351 |
| smc161.lysopcac180                 | 0.076848266  | 0.047508917 | 0.108058792 |
| pcaec444.pcaec382                  | -0.015028194 | 0.009293011 | 0.108146127 |
| pcaac344.pcaac405                  | 0.037946954  | 0.02346697  | 0.108170634 |
| c182.pcaec383                      | 0.106795629  | 0.066058116 | 0.108245138 |
| prolinr.pcaac323                   | 0.11268254   | 0.069701865 | 0.108257263 |
| c141oh.lysopcac181                 | 0.068139538  | 0.042152059 | 0.108282891 |
| pcaec341.pcaec360                  | 0.008765875  | 0.005422975 | 0.10830117  |
| pcaac385.c141                      | -0.040232577 | 0.024895267 | 0.108378969 |
| c2.pcaac281                        | 0.019391539  | 0.011999731 | 0.10839531  |
| c16.glutamicacid                   | -0.090865096 | 0.056239983 | 0.108466876 |
| serine.c18                         | 0.070851894  | 0.043854496 | 0.108478612 |
| pcaac362.pcaec383                  | -0.076682731 | 0.047468241 | 0.108513179 |
| pcaac420.lysopcac180               | 0.065071885  | 0.040281225 | 0.108516177 |
| asymmetricdimethylarginine.prolinr | 0.016608454  | 0.01028289  | 0.108577973 |
| smc241.pcaac404                    | 0.00576857   | 0.003572884 | 0.108710806 |
| pcaac383.c51dc                     | -0.144338154 | 0.089412417 | 0.108764013 |
| pcaac383.pcaac384                  | -0.109179402 | 0.067675057 | 0.10898291  |
| pcaec362.pcaac402                  | 0.052971793  | 0.032837733 | 0.109015679 |
| lysopcac140.smohc222               | -0.007969156 | 0.004940501 | 0.109040041 |
| lysopcac160.lysopcac180            | 0.103775691  | 0.064347455 | 0.109102303 |
| pcaec384.transhydroxyproline       | -0.038685857 | 0.024005874 | 0.109368716 |
| methioninesulfoxide.kynurenine     | -0.026727692 | 0.016585819 | 0.109376935 |
| pcaec321.pcaec445                  | 0.102466105  | 0.063588598 | 0.109395991 |
| smohc221.smc261                    | 0.049731069  | 0.030868952 | 0.109472905 |
| asparticacid.c14                   | -0.063278489 | 0.039280128 | 0.109491283 |
| phenylalanine.pcaac281             | 0.003085635  | 0.001915423 | 0.109494083 |
| pcaac344.tyrosine                  | 0.07924915   | 0.049201584 | 0.109546062 |
| smc202.smc181                      | -0.035195497 | 0.02185131  | 0.109550832 |
| c182.pcaec364                      | -0.023663555 | 0.014695674 | 0.109647301 |
| c12.pcaac403                       | -0.007315232 | 0.004543254 | 0.109671103 |
| asymmetricdimethylarginine.c14     | -0.029118204 | 0.018084571 | 0.109674932 |
| pcaac363.pcaac240                  | -0.023364284 | 0.0145118   | 0.109695342 |
| pcaec364.c141                      | -0.069888169 | 0.04341669  | 0.109763576 |
| pcaec446.pcaec364                  | 0.037171878  | 0.023093348 | 0.109779258 |
| asymmetricdimethylarginine.pcaac40 | 0.012017932  | 0.007467224 | 0.109825453 |



|                        |              |             |             |
|------------------------|--------------|-------------|-------------|
| pcaac281.prolinr       | 0.036760851  | 0.022843964 | 0.109871249 |
| pcaac320.pcaec342      | -0.160744077 | 0.099969344 | 0.110151881 |
| pcaac405.pcaec300      | 0.008549575  | 0.005317638 | 0.110186249 |
| pcaec360.pcaac385      | -0.065938875 | 0.041019988 | 0.110251035 |
| pcaec343.c141oh        | 0.139458059  | 0.0867663   | 0.110294455 |
| isoleucine.pcaac380    | 0.087796702  | 0.054631471 | 0.110340944 |
| spermidine.c18         | 0.083905472  | 0.052212558 | 0.110357187 |
| lysopcac160.prolinr    | -0.051788271 | 0.032239347 | 0.11049545  |
| acetylmithoine.alanine | -0.022969418 | 0.014299068 | 0.110497817 |
| lysopcac203.arginine   | 0.079153728  | 0.049285704 | 0.110572493 |
| leucine.pcaac323       | 0.129177399  | 0.080435977 | 0.110584055 |
| pcaac366.methionine    | -0.053440635 | 0.033297109 | 0.110804633 |
| c142.c8                | 0.082440735  | 0.051366441 | 0.110806832 |
| pcaac343.pcaac281      | 0.005400406  | 0.003365043 | 0.110828497 |
| pcaac425.pcaac365      | 0.08259249   | 0.051465765 | 0.110839603 |
| pcaac380.pcaec444      | 0.169076692  | 0.105359758 | 0.110850309 |
| smc161.pcaec300        | 0.00493842   | 0.003077739 | 0.110893233 |
| pcaac383.pcaac402      | -0.038666261 | 0.024107779 | 0.111040906 |
| pcaac363.lysopcac161   | 0.086193296  | 0.053745947 | 0.111079376 |
| pcaac404.pcaec383      | -0.082608645 | 0.051516369 | 0.111118097 |
| smc160.smc261          | 0.053985041  | 0.033666239 | 0.111119259 |
| smc261.pcaac403        | 0.011431182  | 0.00712882  | 0.111123597 |
| c16.c102               | 0.043387075  | 0.027058377 | 0.111135722 |
| c102.pcaec445          | -0.077147252 | 0.048113405 | 0.111139205 |
| pcaac421.pcaec300      | 0.01459171   | 0.009102989 | 0.111246972 |
| pcaec381.pcaec343      | 0.086244814  | 0.053814935 | 0.11132204  |
| c142.pcaec444          | -0.130000729 | 0.081118169 | 0.111324097 |
| pcaec342.pcaec404      | -0.012497013 | 0.007801103 | 0.111468877 |
| smc160.pcaec341        | 0.117499602  | 0.073380538 | 0.111627908 |
| pcaec321.c2            | 0.05307565   | 0.033154791 | 0.111714907 |
| lysopcac180.pcaac405   | -0.108935878 | 0.06805064  | 0.111723329 |
| c2.smc202              | -0.040726242 | 0.025443243 | 0.111753453 |
| smc181.smohc221        | 0.021819918  | 0.013634756 | 0.111832017 |
| lysopcac203.pcaac406   | 0.088559047  | 0.055349755 | 0.111904421 |
| pcaac385.pcaec404      | -0.011655282 | 0.007284834 | 0.11191595  |
| pcaac323.pcaec445      | 0.069687548  | 0.043562445 | 0.111965191 |
| glycine.pcaac321       | -0.042318833 | 0.026455608 | 0.111987278 |
| lysopcac140.pcaec361   | 0.013852016  | 0.008660233 | 0.112013913 |
| pcaac300.smc241        | 0.111551026  | 0.069742745 | 0.11202116  |
| creatinine.c4          | -0.04588386  | 0.028692922 | 0.112094295 |
| c102.pcaec364          | 0.029264069  | 0.018302066 | 0.112135698 |
| lysopcac161.pcaac364   | 0.073856761  | 0.046192681 | 0.112150032 |
| pcaac322.c102          | 0.058286393  | 0.036467102 | 0.112273833 |
| pcaec406.c141          | -0.045629321 | 0.028552689 | 0.11233031  |
| pcaac360.c5            | -0.034230612 | 0.02142038  | 0.112338092 |

|                                    |              |             |             |
|------------------------------------|--------------|-------------|-------------|
| smohc221.c162                      | -0.116745442 | 0.073079356 | 0.112454705 |
| smc261.c141                        | -0.041984875 | 0.026287618 | 0.112539647 |
| asparticacid.smohc221              | 0.079793828  | 0.04996358  | 0.112560872 |
| c16.smohc221                       | -0.10793935  | 0.067590909 | 0.112580754 |
| pcaec406.kynurenine                | -0.014738891 | 0.00922956  | 0.112587088 |
| pcaac424.pcaac404                  | -0.016142777 | 0.010109036 | 0.11259963  |
| putrescine.pcaac404                | -0.009204871 | 0.005765167 | 0.112651056 |
| pcaac281.c141oh                    | 0.130316705  | 0.081625218 | 0.112675742 |
| smohc222.pcaac384                  | -0.063972376 | 0.040071628 | 0.112692352 |
| smc241.smc261                      | 0.132546322  | 0.083035127 | 0.112733117 |
| pcaac365.c141                      | -0.057880743 | 0.036264696 | 0.112778905 |
| pcaac422.pcaec443                  | 0.105444373  | 0.066089509 | 0.112909611 |
| pcaec384.histidine                 | 0.068013347  | 0.042633974 | 0.112952789 |
| pcaac386.pcaec404                  | -0.01433397  | 0.008987316 | 0.113036486 |
| alphaaminoadipicacid.smohc221      | 0.034646527  | 0.021723378 | 0.113039882 |
| ornithine.tyrosine                 | -0.059140259 | 0.037098335 | 0.11320722  |
| c51.pcaec363                       | -0.020573342 | 0.012908068 | 0.113277296 |
| c4.pcaec343                        | -0.099334511 | 0.062332675 | 0.11332603  |
| citruline.smohc161                 | 0.011718856  | 0.007353821 | 0.113336069 |
| pcaec402.pcaac402                  | -0.125739199 | 0.07891848  | 0.113402086 |
| pcaac385.c0                        | -0.000623285 | 0.000391252 | 0.113452749 |
| pcaac364.pcaec322                  | -0.086529558 | 0.054327421 | 0.113522769 |
| pcaec322.smohc221                  | 0.015626495  | 0.00981337  | 0.113606797 |
| smc160.pcaec443                    | 0.050658687  | 0.031814223 | 0.113615674 |
| smohc221.pcaac402                  | 0.055667724  | 0.034963818 | 0.113655223 |
| asymmetricdimethylarginine.pcaec34 | 0.121084864  | 0.076064349 | 0.113717787 |
| asparticacid.transhydroxyproline   | -0.06259541  | 0.039322266 | 0.113721705 |
| c3.pcaac406                        | 0.045483148  | 0.028574482 | 0.113747926 |
| c51dc.c8                           | 0.05569076   | 0.034992657 | 0.113802268 |
| smohc161.pcaac384                  | -0.051580167 | 0.032443757 | 0.114177414 |
| kynurenine.pcaec445                | -0.068358455 | 0.043005226 | 0.114243986 |
| creatinine.pcaac404                | -0.005757562 | 0.003622283 | 0.114256137 |
| c51.lysopcac181                    | -0.072072186 | 0.04535055  | 0.114314927 |
| pcaac323.pcaec300                  | 0.002303277  | 0.001449386 | 0.114334072 |
| pcaec406.arginine                  | -0.038666117 | 0.024331504 | 0.114334377 |
| c141oh.pcaec443                    | -0.091647983 | 0.057675415 | 0.114358687 |
| pcaac341.lysopcac181               | 0.039009393  | 0.024550592 | 0.114379313 |
| c102.pcaac240                      | -0.015226402 | 0.009589419 | 0.114629236 |
| arginine.lysopcac170               | -0.023808379 | 0.014994315 | 0.11463073  |
| c5.pcaec322                        | 0.184223342  | 0.116059549 | 0.114746117 |
| pcaac281.pcaac344                  | -0.102612386 | 0.064646306 | 0.114752493 |
| pcaac361.pcaec383                  | -0.088735278 | 0.055914107 | 0.114819682 |
| c182.pcaac406                      | 0.033275178  | 0.020969659 | 0.114857698 |
| lysopcac180.smohc221               | -0.06059613  | 0.038190497 | 0.114890357 |
| alphaaminoadipicacid.pcaec361      | -0.015793843 | 0.009956119 | 0.114966457 |

|                      |              |             |             |
|----------------------|--------------|-------------|-------------|
| asparagine.smc261    | 0.033784388  | 0.021297385 | 0.114973039 |
| pcaac380.lysopcac203 | -0.025800686 | 0.016265961 | 0.115004731 |
| c51dc.lysopcac204    | 0.027154542  | 0.017122045 | 0.115058334 |
| pcaac383.pcaec363    | -0.048664381 | 0.030696191 | 0.115191094 |
| pcaac320.pcaec322    | -0.092607754 | 0.058415896 | 0.11519973  |
| c51.lysopcac204      | 0.024045262  | 0.015171385 | 0.115292662 |
| serotonin.pcaec443   | -0.085482754 | 0.053938915 | 0.115315877 |
| pcaac281.pcaec300    | 0.010562926  | 0.006665238 | 0.11532228  |
| leucine.pcaec340     | 0.046267862  | 0.029195203 | 0.115322821 |
| pcaec384.smohc221    | 0.040493024  | 0.025557582 | 0.11541203  |
| serine.smc202        | -0.053239789 | 0.033610115 | 0.115490163 |
| smc161.smohc221      | 0.020100108  | 0.01268945  | 0.115499085 |
| pcaec341.pcaec404    | -0.025561927 | 0.016139285 | 0.115537532 |
| pcaec322.pcaac384    | -0.119075616 | 0.075222322 | 0.115731268 |
| methionine.pcaac322  | 0.074089935  | 0.046819631 | 0.115851706 |
| pcaec403.pcaec380    | 0.101435934  | 0.064100565 | 0.115852754 |
| smohc141.prolinr     | 0.04357367   | 0.027542732 | 0.115946611 |
| pcaec404.pcaec380    | 0.090808673  | 0.057402433 | 0.115963332 |
| pcaec322.lysopcac180 | 0.086875149  | 0.054922121 | 0.116003906 |
| pcaec343.smc261      | 0.048381642  | 0.0305878   | 0.116017132 |
| smohc221.c141        | -0.058842713 | 0.037205056 | 0.116051785 |
| pcaec446.pcaac402    | 0.046305319  | 0.029278118 | 0.116054283 |
| pcaec420.pcaac402    | 0.052628805  | 0.033276573 | 0.116056625 |
| smc261.c141oh        | 0.151097978  | 0.095546181 | 0.116089576 |
| lysopcac203.pcaec422 | 0.068163858  | 0.043108963 | 0.116138469 |
| c0.lysopcac181       | -0.055045512 | 0.034816721 | 0.116182219 |
| pcaac342.pcaac404    | 0.00392418   | 0.002483099 | 0.116331467 |
| pcaac361.c162        | -0.094492606 | 0.05980792  | 0.116427917 |
| c3.citruline         | 0.060197109  | 0.038112359 | 0.116535735 |
| c51.pcaec360         | -0.006420264 | 0.004065686 | 0.116611405 |
| pcaac402.c5          | -0.038231643 | 0.024227877 | 0.116871364 |
| lysopcac281.glycine  | -0.06852951  | 0.043439747 | 0.11696929  |
| arginine.pcaac362    | 0.098624031  | 0.062521724 | 0.117001484 |
| pcaec341.pcaac402    | -0.061518547 | 0.039003304 | 0.117040865 |
| histidine.pcaac344   | 0.043651062  | 0.027680323 | 0.117108565 |
| smohc241.lysopcac160 | 0.022828232  | 0.014478358 | 0.117167662 |
| pcaec342.smohc221    | 0.023191762  | 0.014714083 | 0.11729512  |
| pcaac362.pcaac365    | -0.065917117 | 0.041826412 | 0.117339411 |
| pcaac425.smohc222    | 0.012797977  | 0.008121107 | 0.117357423 |
| pcaac323.pcaec404    | -0.005271552 | 0.003345771 | 0.117427481 |
| smohc241.pcaac384    | -0.07967886  | 0.050574987 | 0.117456787 |
| pcaec380.pcaec404    | -0.034052882 | 0.021622516 | 0.117590484 |
| pcaec365.smc160      | 0.204712442  | 0.130020955 | 0.117688275 |
| smohc141.smc181      | 0.065682641  | 0.041717682 | 0.117688653 |
| h1.c162              | -0.140467426 | 0.08921704  | 0.117690852 |

|                               |              |             |             |
|-------------------------------|--------------|-------------|-------------|
| pcaec365.lysine               | -0.104903386 | 0.066641775 | 0.117761956 |
| kynurenine.lysopcac170        | -0.025261603 | 0.016056497 | 0.117957165 |
| creatinine.pcaec445           | -0.079192506 | 0.050341827 | 0.118003283 |
| smc260.pcaac386               | -0.036611979 | 0.023281603 | 0.118124757 |
| lysopcac161.pcaec322          | -0.099062533 | 0.063015548 | 0.118249516 |
| pcaac424.spermidine           | -0.078887263 | 0.050185304 | 0.118275866 |
| alphaaminoadipicacid.c141     | -0.028689886 | 0.018253803 | 0.118321953 |
| smc160.pcaec382               | -0.015184345 | 0.009667094 | 0.118553291 |
| lysopcac281.pcaac364          | 0.078111095  | 0.049730586 | 0.118562523 |
| pcaec420.arginine             | -0.059617177 | 0.037958009 | 0.118580321 |
| pcaec364.smohc221             | 0.043356806  | 0.027611194 | 0.118660946 |
| lysopcac203.pcaac404          | 0.007826166  | 0.004985555 | 0.118775827 |
| pcaac281.c141                 | -0.041480155 | 0.02642545  | 0.118790595 |
| pcaec443.smohc222             | 0.047316191  | 0.03014625  | 0.118825519 |
| glutamine.c182                | 0.076087838  | 0.048494303 | 0.118953428 |
| pcaac381.methioninesulfoxide  | 0.084444984  | 0.05382714  | 0.118997191 |
| pcaac322.smohc221             | 0.047288573  | 0.030147646 | 0.119055928 |
| pcaec403.pcaac403             | 0.016667025  | 0.010629954 | 0.119204303 |
| pcaec365.pcaac404             | 0.015007188  | 0.009572477 | 0.119247899 |
| smohc161.pcaec382             | -0.021925273 | 0.013985282 | 0.119248903 |
| pcaec424.c141oh               | 0.101451259  | 0.064741984 | 0.119419536 |
| pcaec385.pcaec445             | 0.081508158  | 0.052025328 | 0.1194914   |
| pcaec340.pcaac384             | -0.057921512 | 0.036975667 | 0.119544033 |
| c51.smc202                    | -0.04091263  | 0.02611767  | 0.1195448   |
| methionine.pcaec405           | 0.064571698  | 0.04122614  | 0.119589902 |
| pcaec386.c141                 | -0.044403424 | 0.028358032 | 0.119698937 |
| c4.smc181                     | -0.035256793 | 0.022519366 | 0.119744309 |
| c51.pcaec341                  | 0.067820041  | 0.043321191 | 0.1197688   |
| pcaac406.pcaec300             | 0.012625562  | 0.008067294 | 0.119882687 |
| c12.pcaac365                  | 0.041738373  | 0.026684545 | 0.120091614 |
| pcaac362.smc160               | -0.148370086 | 0.094862276 | 0.120110989 |
| pcaac281.pcaec360             | 0.007505697  | 0.004799418 | 0.120153586 |
| putrescine.smohc221           | -0.035656512 | 0.022802719 | 0.120196083 |
| pcaac321.pcaec322             | -0.083887775 | 0.053675661 | 0.120391544 |
| pcaac343.pcaec404             | -0.016406244 | 0.010500696 | 0.120501779 |
| c10.c0                        | 0.000899057  | 0.000575518 | 0.120555373 |
| pcaac343.smc261               | 0.04041672   | 0.025874146 | 0.120583166 |
| kynurenine.pcaec300           | 0.00490132   | 0.003138145 | 0.120629811 |
| c51dc.pcaac403                | -0.006786169 | 0.004345145 | 0.120646432 |
| c141.pcaac406                 | 0.133038485  | 0.085202759 | 0.120728444 |
| lysopcac180.arginine          | 0.065980405  | 0.042262575 | 0.120783226 |
| lysopcac203.pcaec364          | -0.014733742 | 0.009438004 | 0.120805389 |
| alphaaminoadipicacid.pcaac321 | 0.03074943   | 0.019698294 | 0.120826105 |
| pcaec364.smc160               | 0.214273044  | 0.137266889 | 0.120831799 |
| lysopcac204.histidine         | 0.085343267  | 0.05467358  | 0.120840275 |

|                                    |              |             |             |
|------------------------------------|--------------|-------------|-------------|
| pcaac422.c2                        | 0.089867216  | 0.057584389 | 0.120921054 |
| pcaec361.pcaec382                  | -0.023045478 | 0.014768012 | 0.120948917 |
| pcaac362.pcaac402                  | 0.101651555  | 0.065150682 | 0.121007157 |
| pcaac384.smc161                    | -0.057984564 | 0.037171822 | 0.121089074 |
| histidine.c102                     | 0.054921595  | 0.035214351 | 0.121152837 |
| pcaec443.smc202                    | -0.092730398 | 0.059456846 | 0.121155554 |
| putrescine.pcaec300                | -0.009684101 | 0.00621036  | 0.121221555 |
| pcaec386.kynurenine                | -0.009013019 | 0.005780191 | 0.121233861 |
| creatinine.pcaac320                | -0.097877814 | 0.062771894 | 0.121241531 |
| serine.lysopcac160                 | -0.019001934 | 0.012186685 | 0.121247302 |
| smc240.histidine                   | 0.060627079  | 0.038883386 | 0.12125551  |
| pcaac380.pcaec443                  | 0.05639333   | 0.036176924 | 0.121345966 |
| pcaac240.c51dc                     | -0.16265863  | 0.104398852 | 0.121528498 |
| pcaec343.pcaec300                  | 0.005307777  | 0.003406809 | 0.121542501 |
| lysopcac280.pcaec364               | 0.009770767  | 0.006271443 | 0.121545673 |
| pcaec425.c181                      | 0.02033006   | 0.013059954 | 0.121855561 |
| pcaec360.c51                       | -0.175021686 | 0.112440555 | 0.121879521 |
| pcaac421.c51dc                     | -0.161810395 | 0.103956971 | 0.121893214 |
| c102.c14                           | -0.059182091 | 0.038028154 | 0.121950905 |
| pcaec365.pcaec404                  | -0.014083215 | 0.009049606 | 0.121961893 |
| lysopcac170.pcaec363               | 0.021500302  | 0.013819989 | 0.12207716  |
| phenylalanine.pcaec343             | 0.084734001  | 0.054473747 | 0.122133751 |
| lysopcac204.pcaac380               | 0.098060519  | 0.06304658  | 0.122165984 |
| glutamicacid.lysopcac181           | -0.098992316 | 0.063676275 | 0.122344046 |
| pcaec381.pcaec404                  | 0.030197745  | 0.019425445 | 0.122361363 |
| pcaec342.lysopcac161               | 0.120116187  | 0.077282747 | 0.122433498 |
| pcaec424.pcaec343                  | 0.091908864  | 0.059162041 | 0.12260826  |
| c102.pcaec300                      | 0.009261129  | 0.005961737 | 0.122628023 |
| glutamine.pcaec444                 | -0.131748295 | 0.08481891  | 0.122661146 |
| smohc141.c181                      | 0.024046194  | 0.015484425 | 0.122747458 |
| pcaac421.smc202                    | -0.078402277 | 0.050494917 | 0.122807485 |
| smc160.pcaec300                    | 0.013074934  | 0.008421872 | 0.122850315 |
| pcaec384.smc261                    | 0.054590538  | 0.03516375  | 0.122857749 |
| acetylornithoine.pcaec402          | -0.054166417 | 0.034890636 | 0.122858586 |
| pcaec386.pcaac406                  | 0.088561476  | 0.057052094 | 0.122899577 |
| asymmetricdimethylarginine.pcaec38 | 0.044230342  | 0.028506796 | 0.123071752 |
| c2.pcaac405                        | 0.027396734  | 0.017659237 | 0.123110278 |
| lysine.pcaec342                    | 0.140009808  | 0.090248272 | 0.123116518 |
| pcaec446.lysopcac203               | -0.02032238  | 0.013099711 | 0.123122255 |
| pcaec321.smohc161                  | -0.039328115 | 0.0253659   | 0.123344776 |
| pcaac403.pcaec321                  | 0.063124566  | 0.040725148 | 0.123445078 |
| pcaec301.pcaec322                  | 0.069079027  | 0.044578128 | 0.123540465 |
| pcaac322.pcaec404                  | -0.028629968 | 0.018483299 | 0.123697319 |
| pcaec301.pcaec300                  | -0.009304941 | 0.006007392 | 0.123709077 |
| pcaac321.c5                        | -0.011222727 | 0.007245886 | 0.123726878 |

|                                |              |             |             |
|--------------------------------|--------------|-------------|-------------|
| c51dc.pcaac402                 | 0.02289326   | 0.014780976 | 0.123728915 |
| lysopcac203.smc261             | 0.053928991  | 0.03482303  | 0.123770746 |
| prolinr.lysopcac140            | -0.019228201 | 0.012417846 | 0.123825077 |
| pcaec364.pcaac384              | -0.086174725 | 0.05565571  | 0.12384413  |
| pcaac342.prolinr               | 0.034635625  | 0.022378912 | 0.124003819 |
| c51dc.c14                      | -0.034795563 | 0.022488617 | 0.12410936  |
| pcaac361.arginine              | 0.045064694  | 0.029130745 | 0.124174871 |
| pcaec404.acetylmethionine      | -0.097098954 | 0.062768023 | 0.124182378 |
| pcaec362.pcaac405              | -0.064057686 | 0.041416249 | 0.124247331 |
| c16.pcaac405                   | -0.089706847 | 0.058006634 | 0.124292479 |
| pcaac344.methionine            | -0.034305364 | 0.022183964 | 0.124314005 |
| c14.smohc241                   | 0.0889942    | 0.057577289 | 0.124496564 |
| alphaaminoadipicacid.pcaac323  | 0.151149922  | 0.097801867 | 0.124539309 |
| pcaac343.pcaac240              | -0.02511351  | 0.01625142  | 0.124577747 |
| pcaec321.smohc221              | 0.02499435   | 0.016179656 | 0.12470122  |
| pcaec360.pcaec300              | -0.019866713 | 0.012862257 | 0.124756068 |
| h1.pcaec444                    | -0.102799455 | 0.066557745 | 0.124770368 |
| pcaac402.pcaac404              | -0.023886568 | 0.015467164 | 0.124812674 |
| pcaec363.smohc221              | 0.02189588   | 0.014180805 | 0.124882883 |
| pcaec383.pcaac403              | 0.02194744   | 0.014214584 | 0.124893038 |
| pcaec445.pcaac386              | 0.028665303  | 0.018568073 | 0.124944719 |
| isoleucine.c2                  | -0.052699093 | 0.034137865 | 0.124964467 |
| pcaec401.pcaec406              | -0.064062995 | 0.041506373 | 0.125028502 |
| methionine.smc160              | -0.107961383 | 0.069950542 | 0.125041505 |
| pcaec343.pcaec404              | -0.011324217 | 0.007337742 | 0.125068734 |
| pcaac402.pcaec343              | 0.114318841  | 0.074076451 | 0.125075717 |
| c182.c2                        | 0.073434222  | 0.047588789 | 0.125113465 |
| c18.histidine                  | 0.063692859  | 0.041286738 | 0.125211439 |
| lysopcac160.smc261             | 0.055949248  | 0.03626732  | 0.125212637 |
| pcaac381.c2                    | 0.089888124  | 0.058289513 | 0.125356549 |
| pcaec322.c14                   | -0.028726762 | 0.018629021 | 0.125369701 |
| smohc241.pcaec300              | -0.006804747 | 0.004413226 | 0.125404926 |
| isoleucine.pcaec424            | -0.025902035 | 0.016799831 | 0.12542808  |
| alphaaminoadipicacid.smohc161  | -0.01472366  | 0.009553182 | 0.125567252 |
| pcaac380.pcaac362              | -0.054956246 | 0.035658308 | 0.125577071 |
| smohc222.arginine              | -0.066615672 | 0.04322981  | 0.125631669 |
| pcaac386.pcaec361              | -0.015953406 | 0.010354491 | 0.125690756 |
| pcaac361.pcaac402              | -0.025989449 | 0.016869437 | 0.125715077 |
| glutamicacid.pcaec300          | -0.04458803  | 0.028946677 | 0.12578153  |
| pcaac342.c51dc                 | -0.131432174 | 0.085343819 | 0.125859241 |
| pcaac421.pcaac343              | 0.025647751  | 0.016659965 | 0.125992698 |
| pcaec341.kynurenine            | -0.009909763 | 0.006437112 | 0.125995262 |
| pcaec300.c0                    | -0.000455309 | 0.000296058 | 0.126378719 |
| methioninesulfoxide.spermidine | -0.077030077 | 0.050089417 | 0.126391401 |
| pcaec301.pcaac386              | -0.026382542 | 0.01715625  | 0.126408783 |

|                         |              |             |             |
|-------------------------|--------------|-------------|-------------|
| pcaec342.pcaec300       | 0.005504912  | 0.003579888 | 0.126420321 |
| pcaec365.kynurenine     | -0.012247477 | 0.007965241 | 0.126449095 |
| leucine.pcaec422        | -0.049294215 | 0.032063139 | 0.126499146 |
| c18.smohc241            | 0.086711382  | 0.056404316 | 0.126521796 |
| pcaac424.arginine       | -0.100798155 | 0.065578181 | 0.126582914 |
| spermidine.kynurenine   | -0.051114234 | 0.033259302 | 0.126638791 |
| pcaec445.pcaec361       | -0.012237519 | 0.007963587 | 0.126676992 |
| pcaac380.c14            | -0.058297385 | 0.037938295 | 0.126688591 |
| pcaec445.pcaac421       | 0.099047174  | 0.064487254 | 0.126864628 |
| pcaec404.pcaac404       | -0.014142692 | 0.009208208 | 0.126874346 |
| pcaec402.c141oh         | 0.10772249   | 0.070145202 | 0.126916485 |
| c0.taurine              | -0.058390698 | 0.038045904 | 0.127153075 |
| pcaac420.c5             | -0.01261684  | 0.008221083 | 0.1271654   |
| pcaec343.smohc221       | 0.021659753  | 0.014114505 | 0.12719467  |
| pcaac426.smohc161       | -0.014760386 | 0.009620051 | 0.127253282 |
| c0.smc181               | -0.029797615 | 0.019425184 | 0.127343608 |
| asparagine.pcaec363     | 0.013107158  | 0.008545194 | 0.12736944  |
| pcaec444.smc202         | -0.074276082 | 0.048425357 | 0.127378521 |
| c162.pcaac365           | 0.053681583  | 0.035000547 | 0.127400831 |
| c51dc.pcaec342          | 0.108610255  | 0.070828678 | 0.127477979 |
| c102.c18                | -0.065495637 | 0.042719322 | 0.127542025 |
| pcaac406.pcaec361       | -0.013623526 | 0.00888859  | 0.12765626  |
| pcaec363.pcaec343       | 0.1042433    | 0.068013189 | 0.127657666 |
| leucine.pcaac406        | 0.04812853   | 0.03140458  | 0.127697159 |
| pcaec365.smohc221       | 0.030889793  | 0.02015837  | 0.12774066  |
| pcaec383.c5             | -0.029987912 | 0.01957017  | 0.127747585 |
| pcaac425.lysopcac280    | 0.011140364  | 0.007270799 | 0.12777752  |
| lysopcac203.pcaec445    | 0.082954976  | 0.054144374 | 0.127801983 |
| c51.pcaac384            | 0.095696757  | 0.062467912 | 0.127844505 |
| lysopcac161.lysopcac170 | 0.031231829  | 0.020390136 | 0.127899292 |
| pcaec420.pcaac381       | -0.023562595 | 0.015385895 | 0.127966247 |
| pcaac363.serotonin      | 0.146783435  | 0.095849268 | 0.127976801 |
| prolinr.pcaac425        | -0.093183145 | 0.060848409 | 0.127976891 |
| h1.pcaec403             | -0.064771712 | 0.042298954 | 0.128005097 |
| lysopcac160.lysopcac182 | -0.053570591 | 0.035011752 | 0.128304031 |
| smohc241.pcaec443       | 0.063652349  | 0.041602569 | 0.128319994 |
| pcaec380.pcaec422       | 0.077576306  | 0.050716317 | 0.128418414 |
| leucine.pcaec424        | -0.034102459 | 0.022301668 | 0.128534456 |
| smc180.pcaac341         | 0.035679466  | 0.023334156 | 0.128553727 |
| pcaac320.histidine      | 0.057542477  | 0.037638727 | 0.128617087 |
| smohc141.pcaac384       | -0.055843908 | 0.036529231 | 0.128633096 |
| smc161.pcaac281         | 0.002207944  | 0.001444448 | 0.128675882 |
| glutamicacid.pcaac406   | 0.092850827  | 0.06075475  | 0.128746326 |
| c0.lysopcac161          | -0.089555063 | 0.058606678 | 0.128800897 |
| c142.lysopcac170        | -0.019907855 | 0.013030021 | 0.128856515 |

|                                   |              |             |             |
|-----------------------------------|--------------|-------------|-------------|
| c12.smohc221                      | -0.054960693 | 0.035978496 | 0.128917782 |
| c102.c162                         | 0.134173361  | 0.087843421 | 0.128963323 |
| lysopcac181.pcaac425              | -0.101711306 | 0.066592156 | 0.128972848 |
| pcaec361.pcaec404                 | -0.067277255 | 0.044060697 | 0.129085793 |
| smc261.pcaec342                   | -0.104288906 | 0.068305572 | 0.129116308 |
| smc180.histidine                  | 0.067753335  | 0.04437815  | 0.12913423  |
| lysopcac180.lysopcac182           | -0.07355199  | 0.048178375 | 0.129151007 |
| c181.pcaec405                     | -0.057758912 | 0.037838063 | 0.129196624 |
| smc180.pcaac384                   | -0.082748333 | 0.054216007 | 0.129247674 |
| smc202.phenylalanine              | -0.056081124 | 0.036749156 | 0.129302233 |
| pcaac386.c14                      | -0.087175862 | 0.057125288 | 0.129303539 |
| phenylalanine.pcaec300            | 0.01683307   | 0.011031208 | 0.129327665 |
| lysopcac280.pcaac402              | -0.111418169 | 0.07301866  | 0.129343501 |
| c3.pcaac240                       | -0.038071574 | 0.024953594 | 0.129391115 |
| serine.pcaec444                   | 0.153720665  | 0.100754751 | 0.129391999 |
| pcaac404.pcaac386                 | 0.041112271  | 0.026947796 | 0.129408194 |
| pcaac404.pcaec360                 | 0.00551892   | 0.003617849 | 0.129447111 |
| pcaec322.pcaac362                 | -0.047089864 | 0.030874569 | 0.129514677 |
| lysine.pcaec443                   | -0.067419557 | 0.044205865 | 0.129532645 |
| c182.transhydroxyproline          | -0.040660455 | 0.026662781 | 0.129566975 |
| asymmetricdimethylarginine.smohc2 | 0.013036651  | 0.008551668 | 0.129699705 |
| histidine.pcaac365                | -0.069777041 | 0.045774511 | 0.129722799 |
| pcaec361.pcaec300                 | -0.07187107  | 0.047160035 | 0.129818146 |
| lysopcac204.pcaac406              | 0.044802255  | 0.029398402 | 0.12982152  |
| pcaec342.pcaec322                 | -0.12823135  | 0.084143412 | 0.129823312 |
| smc181.smc180                     | -0.135726386 | 0.089090195 | 0.129945758 |
| c102.pcaac386                     | -0.018912786 | 0.012415472 | 0.12998265  |
| smc181.pcaec404                   | -0.01119741  | 0.00735115  | 0.130008918 |
| smohc161.c141                     | -0.036523361 | 0.023981055 | 0.130061413 |
| smc181.prolinr                    | 0.02321713   | 0.015249829 | 0.13020078  |
| pcaac361.c0                       | -0.001396671 | 0.000917661 | 0.130316388 |
| pcaac404.pcaac384                 | 0.064961945  | 0.042684877 | 0.130339946 |
| pcaac361.pcaac240                 | -0.020187307 | 0.013264958 | 0.130350877 |
| serotonin.pcaac343                | -0.042024356 | 0.027622306 | 0.130466238 |
| lysopcac182.lysopcac181           | 0.081317278  | 0.053457543 | 0.130525329 |
| pcaec382.smohc221                 | -0.088817126 | 0.058390037 | 0.130539271 |
| pcaac361.pcaec363                 | -0.026753466 | 0.017589779 | 0.130572918 |
| pcaac425.lysine                   | -0.118785496 | 0.078099821 | 0.130578435 |
| pcaec404.pcaac403                 | -0.138724397 | 0.091245395 | 0.130729116 |
| pcaec421.pcaec424                 | -0.043501969 | 0.028616726 | 0.130775642 |
| pcaac383.pcaac406                 | -0.071298381 | 0.046913207 | 0.130867434 |
| lysopcac204.smohc221              | -0.038419364 | 0.02528494  | 0.130952132 |
| smc180.smc261                     | 0.085711486  | 0.056414009 | 0.130983955 |
| pcaec363.pcaec445                 | 0.052224909  | 0.034373938 | 0.130987167 |
| pcaec364.tyrosine                 | -0.060347172 | 0.039725665 | 0.131042294 |



|                              |              |             |             |
|------------------------------|--------------|-------------|-------------|
| pcaec446.c18                 | -0.031661045 | 0.020842293 | 0.131047565 |
| arginine.lysopcac161         | 0.091397373  | 0.060189837 | 0.13119648  |
| smohc241.histidine           | 0.064626877  | 0.042561825 | 0.131211993 |
| ornithine.pcaac385           | 0.042139921  | 0.027754854 | 0.131245581 |
| pcaac385.spermidine          | 0.082268254  | 0.054193303 | 0.131305555 |
| c181.pcaac405                | 0.074280126  | 0.048940682 | 0.131379577 |
| h1.pcaac424                  | 0.018370035  | 0.012107249 | 0.131501246 |
| lysopcac161.pcaec364         | -0.024520838 | 0.016163235 | 0.131551904 |
| phenylalanine.spermidine     | -0.085069033 | 0.056077153 | 0.131570837 |
| acetylmithoine.smohc161      | -0.023544358 | 0.015522219 | 0.131617094 |
| pcaec382.pcaac402            | -0.085856536 | 0.056605009 | 0.131629933 |
| smc161.pcaec404              | -0.01015484  | 0.006697018 | 0.131741812 |
| pcaec365.lysopcac281         | 0.027245754  | 0.017968645 | 0.131748951 |
| glutamicacid.pcaec445        | -0.042687649 | 0.028155815 | 0.131792504 |
| pcaec342.lysopcac180         | 0.112198379  | 0.074004883 | 0.131799493 |
| pcaac360.kynurenine          | -0.013022279 | 0.008590193 | 0.131836677 |
| pcaac366.c5                  | -0.019108599 | 0.012606148 | 0.131869848 |
| lysopcac161.pcaac240         | -0.022831157 | 0.015063101 | 0.131898903 |
| acetylmithoine.pcaac365      | 0.055919254  | 0.03690695  | 0.13204039  |
| pcaec362.c0                  | -0.001061825 | 0.000700833 | 0.13205365  |
| pcaec360.pcaec383            | -0.156934981 | 0.103603491 | 0.132135604 |
| pcaac422.smohc221            | -0.121195225 | 0.080037123 | 0.132269261 |
| pcaec406.c18                 | -0.040835014 | 0.026968445 | 0.132284489 |
| c0.c5                        | -0.02481518  | 0.016394211 | 0.132416951 |
| c8.lysopcac280               | -0.013880621 | 0.009170899 | 0.132443391 |
| glutamicacid.pcaec422        | -0.090064882 | 0.05951349  | 0.132493717 |
| pcaec403.pcaec343            | 0.083081332  | 0.054911336 | 0.132580919 |
| pcaac320.transhydroxyproline | -0.031097089 | 0.020556096 | 0.13263606  |
| pcaac386.pcaec300            | 0.014497485  | 0.009584911 | 0.132701981 |
| smc181.pcaec321              | -0.084783215 | 0.056054604 | 0.132707272 |
| serine.phenylalanine         | -0.04662651  | 0.030844308 | 0.132920307 |
| c18.pcaac281                 | -0.002371207 | 0.00156862  | 0.13292585  |
| pcaec360.pcaac402            | 0.076185011  | 0.050399934 | 0.132936523 |
| pcaec322.arginine            | -0.063734866 | 0.042165101 | 0.132950366 |
| lysopcac281.lysopcac180      | 0.0742778    | 0.049144162 | 0.13298298  |
| leucine.pcaec401             | 0.096603413  | 0.063920063 | 0.133011161 |
| glutamine.pcaac384           | -0.100382112 | 0.066427164 | 0.133050717 |
| putrescine.c2                | 0.056091453  | 0.037132361 | 0.133198212 |
| smc261.pcaec300              | -0.015836786 | 0.010484465 | 0.133218922 |
| c141.spermidine              | 0.080356274  | 0.053210207 | 0.133303936 |
| lysopcac180.pcaec443         | -0.092814129 | 0.061497006 | 0.133538684 |
| pcaac320.pcaec383            | -0.1014004   | 0.067187959 | 0.133549245 |
| c10.c141                     | 0.079451547  | 0.05264717  | 0.133567783 |
| lysopcac170.smohc161         | -0.018928814 | 0.012544644 | 0.133623012 |
| pcaec365.c2                  | 0.074458731  | 0.049371618 | 0.133824345 |

|                          |              |             |             |
|--------------------------|--------------|-------------|-------------|
| smohc221.pcaac404        | 0.013007387  | 0.008625484 | 0.13385247  |
| pcaac321.pcaac403        | 0.005461767  | 0.003622096 | 0.133882146 |
| prolinr.pcaac281         | 0.001382831  | 0.000917069 | 0.133887625 |
| pcaec362.pcaec444        | -0.118930624 | 0.0788993   | 0.134017727 |
| glutamicacid.spermidine  | -0.077870428 | 0.051669373 | 0.134089859 |
| pcaac321.pcaac405        | -0.082498757 | 0.054745158 | 0.134123349 |
| glutamine.pcaec380       | -0.064726541 | 0.042954352 | 0.134146868 |
| c142.pcaac406            | 0.046547513  | 0.030894268 | 0.13419724  |
| c101.pcaac341            | 0.007900559  | 0.005244018 | 0.134219378 |
| c181.transhydroxyproline | -0.02726724  | 0.01810052  | 0.134258091 |
| histidine.c2             | -0.092465521 | 0.061380647 | 0.134259664 |
| smohc241.pcaac381        | -0.02589788  | 0.017199523 | 0.134438035 |
| pcaec301.pcaac425        | -0.088331285 | 0.058684134 | 0.134575063 |
| smc241.c51dc             | -0.130537297 | 0.086738942 | 0.134640362 |
| pcaec423.pcaec382        | -0.023541407 | 0.015642987 | 0.134647289 |
| pcaec343.pcaac404        | 0.008371026  | 0.005563168 | 0.134697281 |
| pcaec341.prolinr         | 0.050458857  | 0.033539826 | 0.134768489 |
| pcaec382.c5              | -0.029938276 | 0.019908511 | 0.134936503 |
| c2.spermidine            | 0.079538846  | 0.052905793 | 0.135036294 |
| pcaec386.c51dc           | -0.14092084  | 0.093777574 | 0.135214478 |
| lysopcac281.pcaec445     | 0.042948122  | 0.028582039 | 0.13523701  |
| c181.pcaac365            | 0.042319069  | 0.028163554 | 0.135239084 |
| serotonin.c141           | -0.037662581 | 0.025066382 | 0.135266036 |
| pcaac342.pcaac385        | -0.04401475  | 0.029296426 | 0.135297109 |
| c181.pcaac426            | 0.076000621  | 0.050591429 | 0.135335839 |
| pcaac383.pcaac380        | -0.054448752 | 0.036250604 | 0.135396087 |
| pcaec301.pcaac384        | 0.066412293  | 0.044215969 | 0.135399073 |
| h1.pcaac344              | 0.09733183   | 0.064802495 | 0.135404584 |
| pcaac420.c141            | -0.03660114  | 0.024373004 | 0.135473851 |
| creatinine.serotonin     | 0.088675417  | 0.059077031 | 0.135653308 |
| ornithine.pcaac365       | -0.029430064 | 0.019610327 | 0.135723177 |
| pcaac426.pcaec363        | 0.047171696  | 0.031443526 | 0.135862678 |
| smc180.c181              | 0.014909909  | 0.009938916 | 0.135875434 |
| pcaac424.asparticacid    | 0.075867166  | 0.05057502  | 0.135891686 |
| phenylalanine.pcaec424   | -0.074016276 | 0.04934285  | 0.135904913 |
| pcaec443.spermidine      | -0.075247466 | 0.050176015 | 0.13600083  |
| pcaac321.pcaac240        | -0.019910781 | 0.013280101 | 0.136098126 |
| pcaec341.pcaec300        | 0.016049     | 0.010708174 | 0.136236206 |
| pcaac363.pcaac281        | 0.006652028  | 0.004438612 | 0.136259214 |
| glutamine.pcaec322       | -0.049475471 | 0.033015316 | 0.136288199 |
| pcaec406.pcaec360        | -0.00744308  | 0.004967643 | 0.136352755 |
| creatinine.pcaac363      | 0.025212904  | 0.016828915 | 0.136384618 |
| asparticacid.smohc161    | 0.029068559  | 0.019403958 | 0.136414681 |
| pcaec446.lysopcac170     | 0.022371374  | 0.014933481 | 0.136416099 |
| arginine.lysopcac280     | 0.024810122  | 0.01657207  | 0.136666412 |

|                         |              |             |             |
|-------------------------|--------------|-------------|-------------|
| pcaac404.lysopcac280    | 0.00811672   | 0.005422691 | 0.136743914 |
| pcaac422.pcaac343       | 0.017956159  | 0.011997041 | 0.136767541 |
| smc180.lysopcac280      | 0.011867319  | 0.007929409 | 0.136792193 |
| pcaac426.pcaec444       | 0.184485616  | 0.12329566  | 0.136879224 |
| pcaac300.smohc222       | 0.005887803  | 0.00393555  | 0.136939183 |
| smc160.pcaac425         | 0.094191287  | 0.062962484 | 0.136956206 |
| pcaac424.c181           | 0.022813922  | 0.015250899 | 0.136978065 |
| pcaec444.pcaac404       | 0.00456132   | 0.003049215 | 0.136979802 |
| c10.lysopcac181         | 0.105019298  | 0.070214291 | 0.137032704 |
| methionine.pcaec364     | -0.012791286 | 0.008552948 | 0.137073252 |
| c51.pcaec361            | -0.010307259 | 0.006892367 | 0.137094407 |
| lysopcac181.pcaec363    | 0.029195267  | 0.019528471 | 0.137211601 |
| pcaac404.pcaec444       | 0.105987849  | 0.070894714 | 0.137213399 |
| pcaec425.pcaec300       | 0.013323037  | 0.008913515 | 0.137292381 |
| pcaac401.pcaec424       | -0.06283018  | 0.042038401 | 0.137321226 |
| pcaec406.pcaec443       | 0.071371296  | 0.047762143 | 0.137395164 |
| pcaac320.serotonin      | 0.120923816  | 0.080931263 | 0.137434909 |
| arginine.smohc222       | -0.012475836 | 0.008352123 | 0.137545205 |
| prolinr.pcaec300        | -0.076573706 | 0.051281191 | 0.137681077 |
| c2.lysopcac204          | 0.043082401  | 0.028861177 | 0.137803079 |
| lysopcac170.pcaec404    | 0.02507629   | 0.016802074 | 0.137879943 |
| lysopcac204.pcaec363    | 0.025605309  | 0.017158559 | 0.137925977 |
| pcaec404.pcaec402       | -0.138243643 | 0.092644779 | 0.137948465 |
| pcaac281.smohc221       | 0.038476943  | 0.025787423 | 0.137976901 |
| methionine.pcaac425     | -0.081389689 | 0.054547844 | 0.137977635 |
| lysopcac170.pcaec406    | -0.050000518 | 0.03353151  | 0.138221023 |
| citruiline.c5           | -0.011454016 | 0.007681456 | 0.138227423 |
| smc181.lysopcac280      | 0.016746444  | 0.011233135 | 0.138310868 |
| pcaec424.smc261         | 0.068539674  | 0.045987056 | 0.138414631 |
| pcaac321.spermidine     | 0.079563896  | 0.053400208 | 0.13853477  |
| pcaac384.c18            | -0.049490069 | 0.033219434 | 0.138577366 |
| pcaac381.smohc221       | -0.057963657 | 0.038911493 | 0.13862059  |
| lysopcac180.prolinr     | -0.049433801 | 0.033187026 | 0.138640614 |
| pcaec364.pcaec445       | 0.066943144  | 0.044958146 | 0.138783052 |
| pcaec444.smc181         | 0.023712765  | 0.015925341 | 0.138786891 |
| lysopcac204.lysopcac161 | -0.092687843 | 0.062259288 | 0.138854394 |
| pcaac421.pcaec385       | -0.072302992 | 0.048570403 | 0.138885126 |
| pcaac384.smc181         | 0.063648785  | 0.042758911 | 0.138904145 |
| c51.pcaec385            | -0.095164548 | 0.063933002 | 0.138916229 |
| pcaec446.pcaec443       | 0.03872032   | 0.026013025 | 0.138918048 |
| pcaac380.kynurenine     | -0.010998269 | 0.007389219 | 0.138938129 |
| pcaac341.pcaac300       | -0.160028328 | 0.107584324 | 0.139189039 |
| pcaec425.pcaec343       | 0.103036454  | 0.069276766 | 0.139229293 |
| pcaac405.c51dc          | -0.141852229 | 0.095381427 | 0.139257248 |
| c12.c141                | 0.11433901   | 0.076920273 | 0.139454887 |

|                           |              |             |             |
|---------------------------|--------------|-------------|-------------|
| pcaec341.pcaec445         | 0.048882301  | 0.032892214 | 0.13954083  |
| lysopcac281.c141oh        | 0.105305395  | 0.070860294 | 0.139550642 |
| pcaec421.pcaac281         | -0.004754765 | 0.003201243 | 0.139765201 |
| citruiline.pcaec385       | 0.096352626  | 0.064877203 | 0.139800476 |
| pcaac321.pcaec403         | 0.079463976  | 0.053517868 | 0.139890907 |
| c5.pcaec382               | 0.027105529  | 0.018256027 | 0.139908894 |
| pcaec343.pcaac365         | 0.049055122  | 0.033045925 | 0.139985983 |
| pcaac364.pcaac385         | -0.04336593  | 0.029225623 | 0.140150375 |
| pcaac405.lysopcac280      | 0.005338247  | 0.003597963 | 0.140189244 |
| c51dc.pcaac322            | -0.085057762 | 0.057329654 | 0.1401959   |
| pcaac362.pcaec384         | -0.057047189 | 0.038452435 | 0.140217848 |
| lysopcac161.c51dc         | -0.169097579 | 0.114014338 | 0.140337883 |
| pcaac386.c18              | -0.049494461 | 0.033376477 | 0.140393911 |
| lysopcac204.pcaec444      | -0.110010378 | 0.074187605 | 0.140406414 |
| pcaac364.smc161           | -0.050204432 | 0.03385671  | 0.14041095  |
| pcaec386.pcaec404         | -0.012636982 | 0.008524835 | 0.14053779  |
| pcaac341.c162             | -0.086660478 | 0.058473863 | 0.140626748 |
| pcaac240.lysopcac182      | 0.095439301  | 0.064409612 | 0.14070179  |
| lysopcac161.lysopcac160   | -0.029272204 | 0.019759752 | 0.140794924 |
| acetylmethionine.pcaac402 | 0.038693811  | 0.02612796  | 0.140920099 |
| pcaec405.pcaec343         | 0.095017562  | 0.06416334  | 0.140937424 |
| pcaac380.pcaec404         | -0.013710703 | 0.009258599 | 0.140939676 |
| pcaec342.arginine         | -0.055619751 | 0.037566462 | 0.141017474 |
| phenylalanine.pcaec363    | 0.10995312   | 0.074268161 | 0.141039146 |
| c162.pcaec382             | -0.011834613 | 0.007994268 | 0.14106595  |
| pcaec403.pcaec405         | 0.206791812  | 0.139689863 | 0.141072237 |
| pcaec342.smc241           | 0.106178021  | 0.071743372 | 0.141177245 |
| smc240.pcaac425           | 0.109481024  | 0.073977106 | 0.141187539 |
| pcaec385.tyrosine         | -0.070910188 | 0.047925248 | 0.141275891 |
| pcaac384.pcaac402         | 0.055574576  | 0.037565448 | 0.141327411 |
| serine.pcaac406           | 0.033640527  | 0.022749017 | 0.141497802 |
| pcaec425.c141oh           | 0.10193314   | 0.068938701 | 0.141541323 |
| methionine.pcaac341       | -0.016681955 | 0.011283358 | 0.141581094 |
| c2.pcaac240               | -0.02453238  | 0.016593372 | 0.141584325 |
| pcaac320.pcaac402         | -0.074966848 | 0.050710339 | 0.141613688 |
| pcaec384.pcaec404         | -0.018679684 | 0.012636216 | 0.14163212  |
| pcaac362.glycine          | -0.042188612 | 0.02854161  | 0.141664604 |
| lysopcac182.pcaec384      | -0.051241252 | 0.034672007 | 0.141733778 |
| pcaec424.pcaec404         | -0.036467868 | 0.024676388 | 0.141744667 |
| pcaac362.pcaac240         | -0.020152686 | 0.013639884 | 0.141841616 |
| smohc221.lysopcac161      | 0.11403992   | 0.077193737 | 0.141884785 |
| pcaac425.pcaac402         | 0.071747652  | 0.048574658 | 0.141954799 |
| pcaac365.pcaac425         | -0.133145068 | 0.090148326 | 0.141982595 |
| pcaec384.arginine         | -0.045081519 | 0.03055679  | 0.142416885 |
| smc202.pcaac364           | 0.043136468  | 0.029239493 | 0.142431545 |

|                                    |              |             |             |
|------------------------------------|--------------|-------------|-------------|
| methionine.lysopcac161             | 0.067342496  | 0.045654484 | 0.142494429 |
| lysopcac181.smohc221               | -0.075741758 | 0.051350798 | 0.142510473 |
| pcaac366.pcaec404                  | -0.025166147 | 0.017061998 | 0.142511696 |
| c3.pcaac405                        | 0.093262414  | 0.063253075 | 0.142659329 |
| serotonin.pcaec301                 | 0.122087398  | 0.082820235 | 0.142742039 |
| asymmetricdimethylarginine.pcaec30 | 0.003063753  | 0.002078463 | 0.142762901 |
| phenylalanine.c0                   | 0.001235065  | 0.000838003 | 0.142824249 |
| glutamicacid.pcaac384              | 0.061679323  | 0.041851673 | 0.142840263 |
| smc202.prolinr                     | 0.016978602  | 0.011520895 | 0.142850372 |
| c182.pcaec341                      | 0.035155171  | 0.023856684 | 0.142883751 |
| c182.smohc221                      | 0.019386079  | 0.013155895 | 0.142892472 |
| c141oh.pcaec300                    | 0.023962289  | 0.016263652 | 0.142946657 |
| c18.smc160                         | 0.080404279  | 0.054601894 | 0.143164793 |
| glutamicacid.pcaac343              | 0.03189512   | 0.021662981 | 0.14322459  |
| pcaac364.pcaac341                  | -0.036447314 | 0.024755427 | 0.14323457  |
| asparagine.pcaac386                | 0.029600649  | 0.020105113 | 0.143234926 |
| pcaac402.spermidine                | -0.073564771 | 0.049967653 | 0.143247518 |
| pcaac380.pcaac404                  | 0.011323227  | 0.00769203  | 0.143294739 |
| c141.c14                           | 0.071992142  | 0.048906277 | 0.143302767 |
| creatinine.pcaac321                | -0.033575625 | 0.022811534 | 0.143349278 |
| alanine.pcaac420                   | 0.122100564  | 0.082963716 | 0.143385985 |
| pcaec361.smohc161                  | -0.024816361 | 0.016864254 | 0.14343949  |
| pcaac360.pcaac404                  | 0.020922157  | 0.014221102 | 0.143528893 |
| pcaac323.pcaec343                  | 0.105773488  | 0.071905836 | 0.143584269 |
| asparticacid.pcaac425              | 0.107993171  | 0.073417635 | 0.143599623 |
| alphaaminoadipicacid.pcaac402      | -0.071211014 | 0.048419844 | 0.143665608 |
| methioninesulfoxide.smc161         | 0.110689668  | 0.075272542 | 0.143714375 |
| pcaec425.pcaac323                  | -0.088639704 | 0.060287058 | 0.143775053 |
| pcaec384.lysopcac204               | -0.042512574 | 0.028914928 | 0.143783215 |
| pcaac420.pcaac343                  | 0.031136411  | 0.021185429 | 0.143933386 |
| pcaac384.pcaec404                  | -0.020682354 | 0.014073321 | 0.143958951 |
| pcaac363.pcaac384                  | -0.121314305 | 0.082565857 | 0.144043085 |
| lysopcac181.pcaac381               | -0.055774179 | 0.037964362 | 0.144092959 |
| pcaec341.pcaec405                  | -0.050255213 | 0.03421024  | 0.144122363 |
| pcaec360.kynurenine                | -0.014588974 | 0.009932274 | 0.144167202 |
| pcaac344.smohc161                  | 0.019021834  | 0.01295684  | 0.144371411 |
| c10.c181                           | 0.037113084  | 0.025280763 | 0.144386474 |
| lysopcac140.methionine             | -0.038369493 | 0.026137555 | 0.144400924 |
| kynurenine.valine                  | 0.098327942  | 0.067002902 | 0.144527294 |
| kynurenine.c8                      | 0.051935841  | 0.035406931 | 0.144714895 |
| pcaec322.c51dc                     | -0.152910743 | 0.104266202 | 0.144792414 |
| c14.pcaac403                       | -0.005984753 | 0.004080892 | 0.144795434 |
| pcaec380.glycine                   | 0.054862627  | 0.03741052  | 0.144803058 |
| c51dc.acetylnithoine               | 0.151557621  | 0.103357761 | 0.144847281 |
| pcaac426.pcaac384                  | 0.082392389  | 0.056189827 | 0.144852133 |

|                                    |              |             |             |
|------------------------------------|--------------|-------------|-------------|
| smc260.histidine                   | 0.053612026  | 0.036562318 | 0.144852961 |
| alanine.prolinr                    | 0.072014661  | 0.049138922 | 0.145067162 |
| pcaac403.c141                      | -0.078627726 | 0.053652254 | 0.145074097 |
| prolinr.pcaac404                   | -0.051050353 | 0.034843193 | 0.145172366 |
| pcaec363.alphaaminoadipicacid      | 0.024805301  | 0.016930765 | 0.145184202 |
| pcaec383.c141oh                    | 0.122399991  | 0.083551738 | 0.145222833 |
| acetylmithoine.pcaec342            | -0.087626766 | 0.059826395 | 0.145298168 |
| c14.smc260                         | 0.046863171  | 0.03199976  | 0.14535242  |
| pcaac323.pcaec342                  | 0.103649894  | 0.070786237 | 0.145412114 |
| smc260.pcaac420                    | 0.09175549   | 0.062666527 | 0.14543382  |
| pcaac321.c141                      | -0.040902809 | 0.027936673 | 0.145450369 |
| citruiline.pcaac363                | 0.016135816  | 0.011021208 | 0.145465742 |
| smc180.spermidine                  | 0.077718231  | 0.053090032 | 0.145513394 |
| prolinr.smc160                     | -0.082333992 | 0.056267555 | 0.145687118 |
| pcaac380.c18                       | -0.042377838 | 0.028964409 | 0.145730383 |
| lysopcac280.pcaac364               | 0.078365471  | 0.053567542 | 0.145777414 |
| c181.pcaec383                      | 0.108358529  | 0.074086151 | 0.145866692 |
| pcaac343.pcaac405                  | 0.048568187  | 0.03320797  | 0.145881897 |
| kynurenine.pcaac404                | -0.008497656 | 0.005810417 | 0.145898242 |
| pcaec382.pcaec343                  | 0.06881462   | 0.047065416 | 0.146002321 |
| pcaac320.pcaec300                  | 0.038979167  | 0.026663252 | 0.146057023 |
| asparticacid.pcaec300              | 0.018249122  | 0.012487541 | 0.146199299 |
| smc202.arginine                    | -0.031768004 | 0.021738718 | 0.146207627 |
| pcaec362.smc241                    | 0.076853494  | 0.052592848 | 0.14622522  |
| lysopcacl82.smc261                 | 0.038651007  | 0.026451526 | 0.146249967 |
| asymmetricdimethylarginine.pcaec36 | -0.027629994 | 0.018911612 | 0.146303288 |
| smc161.prolinr                     | 0.0209077    | 0.014317384 | 0.146496642 |
| pcaec445.prolinr                   | 0.029735454  | 0.020363345 | 0.14651245  |
| pcaec446.smohc221                  | 0.022988561  | 0.015743339 | 0.146522143 |
| isoleucine.pcaec401                | 0.111382621  | 0.076282445 | 0.146542537 |
| pcaac421.lysopcac280               | 0.009376012  | 0.006421908 | 0.146578277 |
| citruiline.pcaec403                | 0.043564948  | 0.029864639 | 0.146923686 |
| pcaec364.pcaac406                  | 0.099910235  | 0.068497188 | 0.146963116 |
| isoleucine.spermidine              | -0.078651674 | 0.053940353 | 0.14709527  |
| c18.smohc161                       | -0.015778342 | 0.010823764 | 0.147197965 |
| pcaac425.pcaec383                  | -0.118606577 | 0.081369046 | 0.147228939 |
| c142.pcaec422                      | 0.028024117  | 0.019227671 | 0.147269895 |
| pcaec360.pcaec404                  | 0.03599579   | 0.024701066 | 0.147333912 |
| pcaac341.pcaac403                  | 0.007425198  | 0.005095687 | 0.147362292 |
| lysopcac181.c2                     | 0.064250043  | 0.044096484 | 0.147395446 |
| smohc161.pcaec322                  | 0.109798259  | 0.075366243 | 0.147442491 |
| pcaac381.smohc161                  | -0.044297973 | 0.030415615 | 0.147563984 |
| pcaec406.c2                        | 0.070008991  | 0.048071395 | 0.147582637 |
| pcaec384.smc181                    | 0.018541162  | 0.012731926 | 0.14760509  |
| pcaec422.c141oh                    | 0.108078945  | 0.074221695 | 0.147635256 |

|                                    |              |             |             |
|------------------------------------|--------------|-------------|-------------|
| creatinine.lysopcac204             | -0.028452399 | 0.01954798  | 0.147814106 |
| pcaac365.spermidine                | 0.084546311  | 0.058091174 | 0.147844195 |
| pcaac423.c141                      | -0.050995904 | 0.035041798 | 0.147877154 |
| pcaac424.pcaac402                  | -0.189015164 | 0.129882166 | 0.147878809 |
| c12.smc181                         | -0.025618373 | 0.017610434 | 0.148032208 |
| smc160.c5                          | -0.00872162  | 0.005995414 | 0.1480355   |
| pcaac406.pcaac323                  | -0.130872966 | 0.090001304 | 0.148199332 |
| pcaac343.pcaac300                  | -0.113219173 | 0.077862681 | 0.148209082 |
| c18.pcaac406                       | 0.091636987  | 0.063027167 | 0.148253207 |
| pcaec342.c51dc                     | -0.139038707 | 0.095639414 | 0.148294182 |
| pcaec300.histidine                 | 0.075826409  | 0.052167483 | 0.148366694 |
| pcaec343.pcaac385                  | -0.029554394 | 0.020345858 | 0.148621378 |
| pcaac365.tyrosine                  | 0.058180082  | 0.040054122 | 0.148638934 |
| pcaec322.pcaec384                  | -0.072495238 | 0.049910476 | 0.148647603 |
| histidine.pcaec363                 | 0.014861468  | 0.010232583 | 0.148685957 |
| asymmetricdimethylarginine.pcaec42 | 0.014192235  | 0.009772023 | 0.14869537  |
| lysopcac161.pcaac403               | 0.011980754  | 0.008249489 | 0.148703906 |
| pcaac322.pcaac240                  | -0.024335805 | 0.016757894 | 0.148732518 |
| lysopcac281.pcaac404               | 0.005400374  | 0.003719066 | 0.148766193 |
| pcaec445.arginine                  | -0.04043492  | 0.027846809 | 0.148774402 |
| histidine.pcaec444                 | -0.140063561 | 0.09646004  | 0.148777581 |
| arginine.alanine                   | 0.055046638  | 0.037910892 | 0.148787729 |
| h1.c0                              | -0.001295961 | 0.000893181 | 0.149079778 |
| serotonin.pcaac402                 | 0.025396125  | 0.017503826 | 0.149096366 |
| pcaec386.c18                       | -0.044811313 | 0.030886547 | 0.149111367 |
| c101.lysopcac181                   | 0.058684108  | 0.040450522 | 0.149131744 |
| pcaac281.pcaac365                  | -0.050965443 | 0.035131898 | 0.14915236  |
| c101.pcaec300                      | 0.014026474  | 0.009670187 | 0.149208629 |
| pcaec421.lysopcac181               | 0.080869073  | 0.05576175  | 0.14927143  |
| pcaac240.spermidine                | -0.078506762 | 0.054133417 | 0.149275564 |
| c12.pcaac384                       | 0.066923793  | 0.046148717 | 0.149294819 |
| arginine.pcaac406                  | 0.055162897  | 0.038039489 | 0.149302732 |
| pcaec443.pcaec321                  | 0.038854679  | 0.02680321  | 0.149447661 |
| c182.c102                          | 0.0619804    | 0.042763421 | 0.149517036 |
| pcaac420.pcaec385                  | -0.067418439 | 0.046521518 | 0.149570163 |
| asparticacid.pcaac364              | 0.080769174  | 0.055737103 | 0.149592081 |
| serine.acetylmethionine            | -0.092023182 | 0.063507415 | 0.149618546 |
| c102.transhydroxyproline           | -0.029519211 | 0.020373852 | 0.149656887 |
| isoleucine.pcaec340                | 0.042692911  | 0.029478795 | 0.14982958  |
| pcaac383.asparagine                | 0.011006603  | 0.007599994 | 0.149835152 |
| citruiline.pcaac362                | -0.050043991 | 0.034556807 | 0.149855379 |
| smc241.pcaec300                    | -0.02637549  | 0.018216392 | 0.149930007 |
| alphaaminoadipicacid.c14           | -0.036045996 | 0.024896858 | 0.149953919 |
| pcaac422.pcaac365                  | 0.086540915  | 0.05978122  | 0.150005873 |
| pcaec301.pcaac405                  | 0.032175268  | 0.022226759 | 0.150015812 |

|                                 |              |             |             |
|---------------------------------|--------------|-------------|-------------|
| arginine.smc202                 | 0.104150713  | 0.07198594  | 0.150231462 |
| pcaec300.pcaec341               | -0.115320067 | 0.079708115 | 0.150242849 |
| smc241.c141                     | -0.035710643 | 0.024689266 | 0.150348036 |
| pcaec404.pcaec343               | 0.071772437  | 0.04962663  | 0.150391465 |
| isoleucine.pcaec300             | -0.012339596 | 0.008534867 | 0.150520824 |
| glycine.pcaac406                | 0.04750453   | 0.032857721 | 0.150526968 |
| glutamine.c181                  | -0.064994772 | 0.044960246 | 0.150571595 |
| smc241.spermidine               | 0.073437116  | 0.050810348 | 0.150652093 |
| c0.smohc161                     | 0.018691657  | 0.01293298  | 0.150665371 |
| methionine.lysopcac204          | -0.028822226 | 0.019943337 | 0.150683587 |
| pcaec406.pcaec364               | 0.032577376  | 0.022545622 | 0.150754328 |
| putrescine.pcaac365             | 0.035994052  | 0.024910407 | 0.150758028 |
| pcaac421.c18                    | -0.041703153 | 0.028865269 | 0.150810887 |
| pcaec445.smohc221               | 0.031079094  | 0.02151299  | 0.150834862 |
| pcaec446.pcaec404               | -0.009292077 | 0.006433213 | 0.150912131 |
| c10.pcaac343                    | 0.02162507   | 0.014972038 | 0.150919796 |
| lysopcac170.spermidine          | -0.078350727 | 0.054250977 | 0.150958205 |
| c2.pcaec384                     | 0.065366939  | 0.045261343 | 0.150962644 |
| lysopcac203.c18                 | 0.052924266  | 0.036649251 | 0.151000904 |
| pcaac362.pcaec360               | 0.006462566  | 0.004479069 | 0.151348895 |
| kynurenine.smohc221             | 0.018739016  | 0.012989289 | 0.151401111 |
| pcaac421.lysopcac180            | 0.079598942  | 0.055176867 | 0.151411517 |
| smohc241.glycine                | 0.052009476  | 0.03605334  | 0.151423935 |
| pcaac300.pcaac405               | 0.037078487  | 0.025717902 | 0.151658196 |
| pcaec341.c51dc                  | -0.121988992 | 0.08461837  | 0.151686702 |
| pcaec343.lysopcac281            | 0.050681929  | 0.035156372 | 0.151693155 |
| pcaec402.lysopcac161            | 0.053513547  | 0.037121695 | 0.151705459 |
| lysopcac281.acetylnithoine      | -0.08072971  | 0.056020703 | 0.151846849 |
| lysopcac203.transhydroxyproline | 0.045742929  | 0.031744897 | 0.151879407 |
| asparticacid.pcaec342           | 0.104464912  | 0.072497472 | 0.151881714 |
| pcaec385.histidine              | 0.060543207  | 0.04201826  | 0.151900641 |
| pcaac426.pcaac405               | -0.030526164 | 0.021192422 | 0.152027688 |
| glutamine.pcaec422              | 0.042352079  | 0.029404157 | 0.152051704 |
| pcaec385.smc160                 | 0.170884972  | 0.118642696 | 0.152054639 |
| c0.pcaec341                     | 0.046118724  | 0.032026136 | 0.152139042 |
| putrescine.pcaac403             | -0.006335578 | 0.004399776 | 0.152155025 |
| pcaac341.pcaec403               | 0.071846473  | 0.04989602  | 0.152170127 |
| pcaac386.pcaec364               | -0.03845389  | 0.026707606 | 0.152202195 |
| pcaec443.pcaac402               | -0.079719926 | 0.055369183 | 0.152208329 |
| acetylnithoine.pcaec382         | -0.012003061 | 0.008337152 | 0.152231267 |
| pcaac405.smohc161               | 0.014027122  | 0.00974515  | 0.152319564 |
| c2.smc160                       | 0.068848307  | 0.047838451 | 0.152379427 |
| pcaec301.pcaec445               | -0.04668461  | 0.032445858 | 0.152474745 |
| smc180.pcaec343                 | 0.073690215  | 0.051224524 | 0.152552153 |
| pcaec322.glutamine              | -0.025588935 | 0.017789504 | 0.15259295  |



|                                    |              |             |             |
|------------------------------------|--------------|-------------|-------------|
| lysopcac204.pcaec300               | -0.009039976 | 0.006285328 | 0.152638918 |
| smc161.c14                         | -0.028792801 | 0.020029219 | 0.152844784 |
| pcaec445.pcaec363                  | -0.086696508 | 0.060311325 | 0.15286089  |
| pcaac421.acetylmithoine            | -0.100358807 | 0.069835685 | 0.152977869 |
| glycine.pcaac366                   | 0.060183107  | 0.041879854 | 0.152985987 |
| lysopcac203.c51dc                  | -0.16986639  | 0.118229308 | 0.153067787 |
| pcaac383.leucine                   | 0.015688876  | 0.010920441 | 0.153096592 |
| lysopcac180.smc261                 | 0.061216405  | 0.042625069 | 0.153236421 |
| h1.pcaec445                        | 0.091804103  | 0.063927583 | 0.153263586 |
| serotonin.kynurenine               | -0.017581634 | 0.012245726 | 0.153356696 |
| smc260.pcaec300                    | -0.016353401 | 0.011395156 | 0.153532347 |
| lysopcac204.c14                    | 0.04797716   | 0.033432286 | 0.153550511 |
| c142.spermidine                    | 0.075231007  | 0.052432459 | 0.153618014 |
| asymmetricdimethylarginine.methior | -0.030224575 | 0.021067866 | 0.153671612 |
| arginine.pcaac365                  | -0.060582436 | 0.042236029 | 0.153743073 |
| pcaec401.lysopcac280               | 0.013649074  | 0.009522224 | 0.154024252 |
| pcaec444.pcaac380                  | -0.070083479 | 0.048898231 | 0.154064047 |
| c3.pcaec361                        | -0.009235578 | 0.006443891 | 0.154070235 |
| kynurenine.transhydroxyproline     | -0.020184963 | 0.014086152 | 0.154145865 |
| histidine.smc181                   | 0.038533767  | 0.026904656 | 0.154354508 |
| alanine.c3                         | 0.054971289  | 0.038397512 | 0.154525216 |
| spermidine.lysopcac280             | -0.0609234   | 0.042563117 | 0.154602613 |
| pcaec406.pcaec382                  | -0.018696423 | 0.013068659 | 0.154813062 |
| pcaec386.pcaac384                  | -0.068855388 | 0.048136045 | 0.154869604 |
| pcaec425.c141                      | -0.045639649 | 0.031907033 | 0.154880587 |
| pcaec425.lysopcac280               | 0.016664223  | 0.011651608 | 0.154934064 |
| pcaac364.pcaec360                  | 0.005277441  | 0.003690385 | 0.154978886 |
| pcaec406.pcaac405                  | -0.049289802 | 0.034468238 | 0.154991796 |
| pcaec406.pcaac380                  | -0.140931873 | 0.098569564 | 0.155059352 |
| c16.c5                             | -0.019991374 | 0.013987782 | 0.155222244 |
| smc181.pcaac384                    | -0.075276749 | 0.052679117 | 0.155289683 |
| lysopcac280.citruline              | -0.027148055 | 0.019001642 | 0.155360285 |
| pcaec341.pcaac322                  | 0.090191193  | 0.06312756  | 0.155362614 |
| c181.pcaec380                      | -0.035547875 | 0.024881909 | 0.155376951 |
| smc160.lysopcac180                 | 0.082751321  | 0.057983124 | 0.155808401 |
| lysopcac140.lysopcac180            | 0.04537407   | 0.031795336 | 0.155835822 |
| pcaec401.pcaec363                  | 0.031245038  | 0.021894652 | 0.155837065 |
| lysopcac140.tyrosine               | 0.056941269  | 0.039903527 | 0.155862723 |
| pcaec405.c162                      | 0.082447032  | 0.057793677 | 0.1559773   |
| pcaec384.pcaec382                  | -0.037825759 | 0.026515164 | 0.155978598 |
| pcaec341.smohc221                  | 0.05124731   | 0.035925768 | 0.156005374 |
| pcaec321.pcaac384                  | -0.077465156 | 0.054314438 | 0.156075281 |
| phenylalanine.pcaec360             | 0.006440535  | 0.004515895 | 0.156087574 |
| pcaac365.pcaac362                  | -0.061502709 | 0.043127018 | 0.156119075 |
| pcaec386.pcaec342                  | -0.196365561 | 0.137707527 | 0.156154249 |

|                                   |              |             |             |
|-----------------------------------|--------------|-------------|-------------|
| lysopcac140.pcaac361              | -0.078801887 | 0.055270658 | 0.156216382 |
| lysopcac160.pcaac384              | -0.049087909 | 0.034432625 | 0.156251955 |
| lysopcac160.arginine              | 0.073936711  | 0.051888393 | 0.156454995 |
| pcaac364.smc160                   | 0.100969483  | 0.070862823 | 0.156472257 |
| histidine.glycine                 | 0.040292353  | 0.028278755 | 0.156481092 |
| smc261.pcaac420                   | 0.091049624  | 0.063918734 | 0.156587507 |
| pcaac342.smohc221                 | 0.030424268  | 0.021359886 | 0.156614782 |
| pcaac365.pcaac323                 | -0.137324579 | 0.096416259 | 0.156636755 |
| pcaac364.smc161                   | -0.058587333 | 0.041136487 | 0.156657099 |
| pcaac360.pcaac382                 | -0.010437942 | 0.007329846 | 0.156710622 |
| c102.prolinr                      | 0.038179276  | 0.02681278  | 0.156743021 |
| pcaac322.pcaac322                 | 0.068084584  | 0.047820785 | 0.156793951 |
| c141.pcaac341                     | 0.011492908  | 0.008072405 | 0.156798776 |
| smc202.smohc241                   | 0.114436328  | 0.080387236 | 0.15684634  |
| c14.pcaac365                      | 0.039349665  | 0.027644657 | 0.156890875 |
| serotonin.smohc161                | -0.007518136 | 0.005282285 | 0.156930236 |
| pcaac405.pcaac380                 | 0.096641148  | 0.067908611 | 0.156978662 |
| smohc161.citruline                | 0.022361513  | 0.015713676 | 0.156991789 |
| lysopcac170.pcaac381              | -0.044551052 | 0.03131635  | 0.157121283 |
| histidine.pcaac406                | 0.034985969  | 0.024595132 | 0.15716119  |
| pcaac322.pcaac445                 | 0.089095554  | 0.062636534 | 0.157176785 |
| pcaac444.pcaac240                 | -0.01863213  | 0.013099143 | 0.157185024 |
| pcaac444.pcaac420                 | 0.168180161  | 0.118253377 | 0.157240441 |
| pcaac386.smc180                   | -0.028743826 | 0.020217653 | 0.15738029  |
| pcaac362.pcaac300                 | 0.006210934  | 0.004368611 | 0.157380558 |
| c18.lysopcac204                   | 0.038893213  | 0.027363338 | 0.15748383  |
| lysopcac182.tyrosine              | -0.070713464 | 0.049755829 | 0.157528064 |
| pcaac406.pcaac403                 | -0.008217787 | 0.005782526 | 0.157547901 |
| prolinr.glycine                   | -0.020476843 | 0.01441046  | 0.157597385 |
| c141oh.valine                     | -0.071383552 | 0.050235924 | 0.157598692 |
| pcaac424.arginine                 | -0.074476721 | 0.052423893 | 0.15768652  |
| pcaac444.smc261                   | 0.029777747  | 0.020970682 | 0.157887904 |
| c3.pcaac322                       | 0.087414643  | 0.061565599 | 0.157919464 |
| asymmetricdimethylarginine.smc240 | -0.035223853 | 0.02480967  | 0.157948165 |
| kynurenine.c5                     | -0.009867764 | 0.006950805 | 0.157978784 |
| lysopcac280.lysopcac281           | 0.030945938  | 0.021804814 | 0.158104641 |
| lysopcac280.smohc221              | -0.028004174 | 0.019734461 | 0.158155767 |
| histidine.pcaac322                | -0.059291212 | 0.041788184 | 0.158213448 |
| smohc222.pcaac360                 | -0.005714482 | 0.004028204 | 0.158281378 |
| c142.pcaac420                     | 0.120401011  | 0.084883941 | 0.158339214 |
| pcaac344.pcaac424                 | -0.008275047 | 0.005835618 | 0.158454323 |
| lysopcac204.lysopcac170           | 0.029239218  | 0.020622996 | 0.158520567 |
| smc161.pcaac365                   | -0.05648099  | 0.039847368 | 0.158626534 |
| pcaac343.c14                      | -0.031306114 | 0.022089592 | 0.158684783 |
| alphaaminoadipicacid.valine       | 0.078177354  | 0.055170484 | 0.158748864 |

|                                   |              |             |             |
|-----------------------------------|--------------|-------------|-------------|
| pcaec340.kynurenine               | -0.008376827 | 0.005913214 | 0.158861429 |
| pcaac386.tyrosine                 | 0.063232542  | 0.044645078 | 0.158946123 |
| ornithine.pcaec364                | 0.021805533  | 0.015396449 | 0.15896605  |
| pcaac403.pcaec343                 | 0.099759014  | 0.07045721  | 0.15907985  |
| pcaac320.pcaac386                 | 0.055742204  | 0.039379004 | 0.159182107 |
| pcaac363.smc161                   | -0.064697996 | 0.045709736 | 0.159217657 |
| pcaec301.citruline                | -0.009663896 | 0.006835428 | 0.159690325 |
| pcaac343.pcaac402                 | 0.077260209  | 0.054669512 | 0.159858197 |
| lysopcac281.pcaec342              | 0.118474322  | 0.083833592 | 0.159862521 |
| spermidine.c12                    | 0.202395676  | 0.143231396 | 0.159903721 |
| serotonin.pcaec405                | -0.058238577 | 0.04122427  | 0.160004206 |
| c2.arginine                       | 0.072669758  | 0.051449751 | 0.160087628 |
| asymmetricdimethylarginine.smc261 | 0.0428534    | 0.030362386 | 0.160394418 |
| smc180.prolinr                    | 0.055538582  | 0.039358168 | 0.16047996  |
| c182.lysopcac160                  | 0.012649609  | 0.008964382 | 0.16048301  |
| pcaec425.pcaec404                 | -0.02477428  | 0.017562893 | 0.160628119 |
| pcaac366.lysopcac181              | 0.045236803  | 0.032070998 | 0.160652562 |
| pcaac404.asparticacid             | 0.03710114   | 0.026308845 | 0.160742441 |
| glycine.c162                      | 0.077395172  | 0.054892739 | 0.160825206 |
| pcaec361.pcaec343                 | 0.112686247  | 0.079930091 | 0.160861914 |
| citruline.pcaec360                | 0.00797786   | 0.005659674 | 0.160924667 |
| smohc222.prolinr                  | 0.047067441  | 0.033393493 | 0.160959421 |
| pcaac300.pcaac402                 | -0.041659821 | 0.029559975 | 0.16100287  |
| smohc221.pcaec445                 | 0.03924302   | 0.027847867 | 0.161043893 |
| pcaec363.pcaec404                 | -0.010767322 | 0.007641167 | 0.161065456 |
| smohc141.pcaec364                 | -0.044705169 | 0.031728688 | 0.161105994 |
| pcaac403.spermidine               | -0.070635424 | 0.050141553 | 0.161183419 |
| smohc222.c141                     | -0.030991267 | 0.022001064 | 0.16121131  |
| smc181.c0                         | -0.003008756 | 0.002136467 | 0.161311779 |
| glycine.valine                    | -0.06864545  | 0.048745205 | 0.161322228 |
| pcaec364.pcaac366                 | -0.044569796 | 0.031650518 | 0.161341421 |
| prolinr.pcaac322                  | 0.059113142  | 0.041981888 | 0.161377585 |
| pcaec406.c141oh                   | 0.130792292  | 0.092890353 | 0.161387685 |
| pcaac365.c51dc                    | -0.157615126 | 0.111954737 | 0.161441462 |
| pcaec340.c0                       | -0.000603463 | 0.000428747 | 0.161542842 |
| pcaec422.pcaac402                 | 0.118349279  | 0.084098495 | 0.161612093 |
| smohc161.prolinr                  | 0.050179991  | 0.035658594 | 0.161622666 |
| citruline.c14                     | -0.039473784 | 0.028050807 | 0.161625505 |
| smc261.pcaac344                   | -0.087657145 | 0.062298325 | 0.161675789 |
| pcaec363.pcaec300                 | 0.004835105  | 0.003436408 | 0.161685176 |
| glutamicacid.pcaec444             | 0.132281657  | 0.094038182 | 0.161786592 |
| pcaac343.c162                     | -0.082602296 | 0.058723994 | 0.161804696 |
| pcaec382.pcaec363                 | 0.049808377  | 0.035415829 | 0.161873316 |
| pcaac402.smohc221                 | -0.09182119  | 0.065292741 | 0.161899187 |
| c2.lysopcac180                    | 0.101047132  | 0.071859804 | 0.161937611 |

|                         |              |             |             |
|-------------------------|--------------|-------------|-------------|
| smc180.lysopcac170      | 0.019088584  | 0.013575005 | 0.161941688 |
| smc261.pcaac404         | 0.006529935  | 0.00464622  | 0.16215724  |
| c51dc.pcaac363          | 0.041642686  | 0.029633161 | 0.162203651 |
| pcaec444.histidine      | 0.054803759  | 0.039002259 | 0.162242205 |
| c162.lysopcac204        | 0.031815503  | 0.022643126 | 0.16225965  |
| pcaac405.arginine       | 0.029263179  | 0.020828653 | 0.162300069 |
| creatinine.kynurenine   | -0.026142966 | 0.018610793 | 0.162367613 |
| pcaec406.pcaac381       | -0.029302617 | 0.020860827 | 0.162382119 |
| pcaec340.smc160         | 0.106558597  | 0.075872831 | 0.162451912 |
| histidine.pcaec361      | 0.007687935  | 0.005474271 | 0.162469989 |
| c51dc.pcaac406          | 0.072763723  | 0.051814929 | 0.16249245  |
| pcaac405.pcaec385       | 0.109522653  | 0.077998525 | 0.162533217 |
| glutamicacid.c18        | 0.1155032    | 0.082265816 | 0.162574489 |
| c2.pcaac422             | 0.090310424  | 0.064324771 | 0.162588878 |
| smohc222.c181           | 0.016329037  | 0.011633629 | 0.162698682 |
| lysopcac182.pcaac320    | -0.088249031 | 0.062903161 | 0.16289852  |
| smc240.smc261           | 0.043465865  | 0.030984478 | 0.162930568 |
| pcaac322.pcaac405       | 0.034059083  | 0.024281641 | 0.16297791  |
| lysopcac281.c2          | -0.094767814 | 0.067574685 | 0.163053003 |
| methionine.pcaec363     | 0.028109596  | 0.020043996 | 0.163059286 |
| c12.alanine             | 0.091201178  | 0.065044851 | 0.163138912 |
| pcaac361.pcaec446       | -0.036105149 | 0.025774066 | 0.163525155 |
| glycine.smc261          | 0.017828885  | 0.012729687 | 0.163601966 |
| pcaac386.glycine        | 0.028971019  | 0.02068542  | 0.16360872  |
| pcaac240.smohc221       | 0.146441688  | 0.104580832 | 0.163692323 |
| lysopcac280.methionine  | -0.038409394 | 0.027430874 | 0.163706591 |
| prolinr.pcaec360        | 0.004957063  | 0.00354145  | 0.163855422 |
| pcaec365.alanine        | -0.027264095 | 0.01947901  | 0.163873867 |
| c0.kynurenine           | 0.017207157  | 0.012296068 | 0.163952273 |
| smohc241.pcaec342       | -0.101098231 | 0.072244445 | 0.163955882 |
| pcaec322.pcaac420       | 0.102318309  | 0.073116617 | 0.163957652 |
| lysine.smc261           | 0.055267654  | 0.039498196 | 0.163999575 |
| asparagine.pcaac421     | 0.046903379  | 0.033526725 | 0.164077426 |
| pcaec385.alanine        | -0.019939763 | 0.014253503 | 0.164091519 |
| pcaec361.pcaec360       | -0.009845622 | 0.007039935 | 0.164211018 |
| asparticacid.kynurenine | -0.012242636 | 0.008756235 | 0.164323795 |
| lysopcac161.pcaec406    | -0.034757902 | 0.024860041 | 0.1643294   |
| pcaac364.smc240         | 0.031519579  | 0.022544336 | 0.164337861 |
| serine.lysopcac280      | 0.016293004  | 0.01165401  | 0.164354445 |
| pcaac406.lysopcac161    | -0.094298468 | 0.067459073 | 0.164413768 |
| pcaec422.lysopcac280    | 0.011253945  | 0.00805313  | 0.164533593 |
| pcaec421.pcaac343       | 0.021669828  | 0.015506663 | 0.164536461 |
| pcaec445.lysopcac170    | 0.015379738  | 0.011006696 | 0.164580013 |
| smc180.pcaec445         | 0.050972986  | 0.03647972  | 0.1645833   |
| smc240.pcaac381         | -0.024002164 | 0.017178955 | 0.164617001 |

|                         |              |             |             |
|-------------------------|--------------|-------------|-------------|
| lysopcac160.pcaac406    | 0.041457544  | 0.029672842 | 0.164625926 |
| pcaac323.c18            | -0.020745586 | 0.014851415 | 0.164709461 |
| lysopcac140.c18         | 0.051274555  | 0.036707122 | 0.164715571 |
| pcaac383.kynurenine     | -0.009662779 | 0.006918304 | 0.164763073 |
| smc261.pcaec364         | 0.014208394  | 0.010174331 | 0.164824125 |
| pcaac420.pcaec342       | -0.130337018 | 0.093337942 | 0.164852685 |
| smc161.pcaec341         | 0.046096351  | 0.033012516 | 0.164873584 |
| c18.glutamicacid        | -0.044991778 | 0.032224003 | 0.164906673 |
| methionine.smohc221     | -0.031771077 | 0.02275554  | 0.164915256 |
| alanine.pcaac381        | 0.015183024  | 0.010876414 | 0.164985028 |
| prolinr.smohc161        | -0.015536306 | 0.011130512 | 0.16502357  |
| pcaac360.lysopcac203    | -0.034387895 | 0.024636275 | 0.165025595 |
| c0.pcaec360             | 0.006654101  | 0.004768148 | 0.165113393 |
| smc241.lysopcac180      | 0.068826473  | 0.049321145 | 0.165130129 |
| pcaac405.pcaac402       | 0.052023959  | 0.037297287 | 0.165319772 |
| pcaec301.pcaac380       | 0.068168349  | 0.048882086 | 0.165409801 |
| pcaec380.citruiline     | -0.019374673 | 0.013894272 | 0.165443113 |
| pcaac405.smc240         | 0.032477235  | 0.023295482 | 0.165531356 |
| smc261.smohc221         | -0.059278052 | 0.042530323 | 0.165639812 |
| c102.pcaac406           | 0.045706696  | 0.032795167 | 0.16566425  |
| smohc161.pcaec425       | -0.028660222 | 0.020564478 | 0.165672116 |
| smc160.glutamine        | -0.02430956  | 0.017443114 | 0.165680586 |
| pcaac422.pcaac323       | -0.088465334 | 0.063479579 | 0.16569414  |
| smc240.smohc222         | 0.008888536  | 0.006379607 | 0.165793584 |
| pcaec381.pcaac403       | 0.012640166  | 0.009072411 | 0.165799648 |
| serine.pcaac405         | -0.061372804 | 0.044059504 | 0.165890331 |
| pcaac323.kynurenine     | -0.004692295 | 0.003369    | 0.165940672 |
| pcaac365.kynurenine     | -0.012923886 | 0.009286019 | 0.166251327 |
| pcaec404.c141oh         | 0.106527643  | 0.07655343  | 0.166315178 |
| c16.spermidine          | 0.071615117  | 0.051473151 | 0.166386605 |
| pcaac365.pcaec361       | -0.022715938 | 0.016327608 | 0.166401948 |
| histidine.pcaec422      | 0.052941915  | 0.038057124 | 0.166445013 |
| glycine.pcaac426        | -0.034211335 | 0.024595357 | 0.166490357 |
| glycine.pcaec322        | -0.03933886  | 0.028298243 | 0.166737189 |
| pcaac323.pcaac364       | 0.042312704  | 0.030444474 | 0.166834176 |
| lysopcac161.pcaec363    | 0.026975854  | 0.019414128 | 0.166936026 |
| pcaec446.pcaac405       | -0.065215126 | 0.046939684 | 0.166983703 |
| c141.lysopcac180        | 0.063072287  | 0.045411693 | 0.167116935 |
| lysopcac170.lysopcac180 | -0.143768881 | 0.10351889  | 0.167141784 |
| pcaec300.smc160         | 0.104049928  | 0.07493104  | 0.167205138 |
| c2.valine               | -0.078583135 | 0.056595052 | 0.167233415 |
| pcaec443.acetylmithoine | -0.06131207  | 0.044157629 | 0.167243762 |
| pcaac384.pcaac381       | -0.034420555 | 0.02479444  | 0.167318203 |
| c181.pcaec341           | 0.051759724  | 0.037288141 | 0.167359323 |
| pcaec444.lysopcac180    | 0.051482838  | 0.037099829 | 0.167486204 |

|                              |              |             |             |
|------------------------------|--------------|-------------|-------------|
| pcaac385.pcaac403            | -0.00875369  | 0.006309323 | 0.167565997 |
| smohc141.pcaec361            | -0.016045324 | 0.011565186 | 0.167578192 |
| pcaec446.glycine             | -0.071006301 | 0.051204155 | 0.167776631 |
| pcaec382.arginine            | -0.149382601 | 0.107727722 | 0.167795237 |
| smc161.phenylalanine         | -0.058304708 | 0.042059906 | 0.167928624 |
| pcaac383.pcaec343            | 0.07493798   | 0.054060515 | 0.16794178  |
| pcaac342.serotonin           | 0.127817914  | 0.092210909 | 0.167953816 |
| pcaec406.pcaac425            | 0.10944353   | 0.078959674 | 0.167977814 |
| lysopcac161.c2               | 0.091730514  | 0.066182772 | 0.167993244 |
| pcaac405.spermidine          | 0.074923268  | 0.054056654 | 0.167994528 |
| smc261.smc240                | -0.025643714 | 0.01850723  | 0.168119065 |
| pcaac281.pcaac381            | -0.045637058 | 0.032942773 | 0.168198853 |
| smc160.arginine              | -0.04155973  | 0.030013299 | 0.168392007 |
| pcaec365.c141oh              | 0.112615745  | 0.081332534 | 0.168415531 |
| c102.pcaec423                | -0.065083373 | 0.047008699 | 0.16845738  |
| pcaec401.pcaac323            | -0.102642418 | 0.074147133 | 0.168515109 |
| smc241.pcaec321              | -0.093337821 | 0.067428003 | 0.168529857 |
| pcaec421.c51dc               | -0.174380273 | 0.125994641 | 0.168600038 |
| histidine.asparticacid       | 0.043693716  | 0.031588736 | 0.168851852 |
| pcaec321.c14                 | -0.037965188 | 0.02744928  | 0.168883158 |
| lysopcac281.phenylalanine    | -0.070052866 | 0.050650931 | 0.168898866 |
| lysine.pcaac404              | -0.00541687  | 0.003916923 | 0.168933092 |
| pcaec445.pcaec404            | -0.012076684 | 0.008733099 | 0.168956504 |
| pcaec423.smc261              | 0.040029824  | 0.028949857 | 0.168997495 |
| pcaec301.pcaec382            | -0.011671746 | 0.008441917 | 0.169038906 |
| c141.smohc221                | -0.052205788 | 0.037763781 | 0.16908918  |
| pcaac341.lysopcac280         | 0.020541289  | 0.014859117 | 0.169097456 |
| pcaac380.pcaac381            | -0.037206157 | 0.026916019 | 0.169127392 |
| pcaec402.transhydroxyproline | -0.03644629  | 0.026367367 | 0.169144376 |
| lysopcac181.glycine          | -0.015831046 | 0.011455443 | 0.169230985 |
| smohc221.smc181              | 0.022542914  | 0.01632082  | 0.169454934 |
| alphaaminoadipicacid.prolinr | 0.033301904  | 0.024114237 | 0.169525704 |
| pcaac321.lysopcac181         | 0.059041902  | 0.04275748  | 0.169571855 |
| pcaec364.lysine              | -0.090286373 | 0.065389687 | 0.169606291 |
| c5.kynurenine                | -0.013824496 | 0.010012418 | 0.169608801 |
| pcaec405.pcaac300            | -0.058605341 | 0.042455763 | 0.169715981 |
| c102.pcaec301                | 0.118872764  | 0.086122999 | 0.169752412 |
| leucine.c2                   | -0.046699262 | 0.033836881 | 0.169794896 |
| pcaec386.pcaec321            | -0.069600779 | 0.050436181 | 0.169841546 |
| pcaec420.pcaac385            | -0.065298739 | 0.047321061 | 0.169862621 |
| pcaec444.pcaec360            | -0.014879932 | 0.010784015 | 0.169891773 |
| pcaac384.prolinr             | 0.036425532  | 0.026400203 | 0.169913087 |
| pcaec321.prolinr             | 0.0229929    | 0.016666362 | 0.169957721 |
| pcaec365.pcaac366            | -0.051149237 | 0.037086775 | 0.170087448 |
| alanine.phenylalanine        | -0.058940475 | 0.042742269 | 0.170149996 |

|                                 |              |             |             |
|---------------------------------|--------------|-------------|-------------|
| pcaac421.pcaec342               | -0.120836207 | 0.087654809 | 0.170281622 |
| prolinr.pcaac420                | 0.124033682  | 0.089975922 | 0.170289445 |
| c162.glycine                    | -0.030393497 | 0.022075074 | 0.17081234  |
| pcaac402.acetylmithoine         | -0.063740045 | 0.046296306 | 0.170824556 |
| prolinr.pcaac381                | 0.022395615  | 0.016267576 | 0.170849873 |
| pcaec386.smohc221               | 0.026471508  | 0.01923122  | 0.170916696 |
| smc241.tyrosine                 | -0.067747472 | 0.049221701 | 0.170951306 |
| glutamicacid.smohc221           | -0.141569379 | 0.102880253 | 0.171048361 |
| lysopcac170.prolinr             | -0.056044616 | 0.040732028 | 0.171086959 |
| pcaec362.smohc221               | 0.024765448  | 0.017999604 | 0.17110127  |
| pcaec322.kynurenine             | -0.007580537 | 0.005512793 | 0.171350868 |
| c142.c181                       | 0.024584789  | 0.017885702 | 0.171515249 |
| smc240.pcaac404                 | 0.004814272  | 0.00350385  | 0.171687107 |
| pcaec364.arginine               | -0.063908452 | 0.046517148 | 0.171726187 |
| creatinine.lysopcac203          | -0.014434945 | 0.010507168 | 0.171741639 |
| c18.pcaec382                    | -0.00922409  | 0.006715712 | 0.171837693 |
| pcaac404.c5                     | -0.012185881 | 0.008873687 | 0.171914796 |
| histidine.pcaac425              | -0.089196218 | 0.064959903 | 0.171965534 |
| prolinr.citruline               | 0.021747772  | 0.015841761 | 0.172053551 |
| isoleucine.pcaac406             | 0.045377524  | 0.033067605 | 0.172223504 |
| pcaac344.pcaec383               | -0.091822917 | 0.066942267 | 0.172407387 |
| asparticacid.pcaec401           | 0.072964382  | 0.053202458 | 0.172477527 |
| smohc221.pcaac366               | -0.088753325 | 0.064723536 | 0.172533296 |
| alphaaminoadipicacid.kynurenine | -0.006037708 | 0.00440335  | 0.172566163 |
| lysopcac181.spermidine          | -0.079908224 | 0.058290203 | 0.172657486 |
| isoleucine.pcaac343             | 0.034914228  | 0.025477812 | 0.172810295 |
| ornithine.smc261                | 0.050510016  | 0.036866914 | 0.17290813  |
| pcaac322.prolinr                | 0.03495446   | 0.025514745 | 0.172936973 |
| pcaac386.smc261                 | 0.034076669  | 0.024875466 | 0.172961978 |
| pcaec425.pcaec380               | 0.089026451  | 0.064989292 | 0.172970495 |
| prolinr.pcaec405                | 0.077456384  | 0.056551929 | 0.173036785 |
| pcaac365.pcaec384               | 0.053390182  | 0.038984857 | 0.173080356 |
| pcaac240.pcaec343               | 0.1017064    | 0.074293194 | 0.173243726 |
| pcaac405.pcaec361               | -0.010817641 | 0.007904727 | 0.173394715 |
| h1.alanine                      | -0.033526139 | 0.024500488 | 0.173431004 |
| c4.pcaac300                     | 0.053794222  | 0.039314046 | 0.173451568 |
| pcaec301.c5                     | 0.01190161   | 0.008698447 | 0.173475084 |
| smc240.transhydroxyproline      | 0.036764987  | 0.026880949 | 0.173646419 |
| serine.pcaec385                 | -0.049385739 | 0.036112715 | 0.173694045 |
| c3.pcaac323                     | 0.081097964  | 0.059306027 | 0.173723862 |
| pcaec406.smc261                 | 0.047349485  | 0.034640906 | 0.173906042 |
| c142.pcaac403                   | -0.005487648 | 0.004015118 | 0.173943488 |
| pcaac406.pcaac425               | 0.106180738  | 0.077697542 | 0.173992249 |
| pcaec406.smohc221               | 0.027098826  | 0.01983084  | 0.174020886 |
| pcaec301.c2                     | 0.078428639  | 0.05739611  | 0.174037774 |

|                          |              |             |             |
|--------------------------|--------------|-------------|-------------|
| isoleucine.pcaec422      | -0.042745493 | 0.031282434 | 0.174040164 |
| c5.pcaec445              | 0.112385546  | 0.082261962 | 0.17411737  |
| pcaec405.smohc221        | 0.06508186   | 0.047655671 | 0.174280911 |
| pcaac366.pcaec422        | 0.042303471  | 0.030983005 | 0.174372448 |
| c14.pcaec424             | 0.01620408   | 0.011872864 | 0.174553376 |
| pcaac281.glycine         | 0.109017248  | 0.07988758  | 0.17460555  |
| c141.c8                  | 0.063546381  | 0.046571999 | 0.174654855 |
| c141.c2                  | 0.066938846  | 0.049070317 | 0.174759941 |
| lysopcac204.smc240       | 0.045311042  | 0.033218804 | 0.174798705 |
| pcaac344.c2              | 0.079683374  | 0.05843193  | 0.174899867 |
| pcaac322.glycine         | 0.036244202  | 0.02658333  | 0.174987011 |
| c5.lysopcac160           | 0.015829358  | 0.01161673  | 0.175233443 |
| pcaac365.smc241          | 0.14830278   | 0.108933331 | 0.175619434 |
| pcaac404.smohc221        | 0.065766009  | 0.048337351 | 0.175886079 |
| pcaec405.pcaac381        | 0.041121399  | 0.030228153 | 0.175947715 |
| pcaec300.pcaac420        | 0.09975376   | 0.073339311 | 0.176010808 |
| c141oh.pcaac403          | -0.004505422 | 0.003313957 | 0.176212329 |
| c101.pcaac425            | -0.089018443 | 0.065478684 | 0.176220812 |
| prolinr.pcaac402         | -0.032163183 | 0.023659933 | 0.176254965 |
| pcaac320.c8              | 0.056313892  | 0.041431005 | 0.17630981  |
| pcaac385.lysopcac161     | -0.078405571 | 0.057693549 | 0.176379455 |
| pcaec340.pcaac365        | -0.072230525 | 0.053152085 | 0.176398451 |
| lysopcac280.smohc161     | 0.01304886   | 0.009602832 | 0.176425358 |
| creatinine.lysopcac180   | -0.064496741 | 0.047471157 | 0.176489978 |
| acetylorithoine.pcaec300 | -0.01880647  | 0.013842315 | 0.176499255 |
| smc181.pcaac364          | 0.051529851  | 0.037934757 | 0.176575445 |
| pcaec423.lysopcac203     | -0.024342181 | 0.01792582  | 0.176715116 |
| smohc241.smc240          | -0.037310601 | 0.027477126 | 0.176734436 |
| smc180.c0                | -0.000712366 | 0.000524714 | 0.176813695 |
| smc202.pcaec404          | -0.007566598 | 0.005573535 | 0.176824535 |
| lysopcac281.pcaec380     | 0.063786649  | 0.046988805 | 0.176858756 |
| smohc222.pcaec341        | 0.067914518  | 0.050030521 | 0.176866463 |
| pcaac322.tyrosine        | 0.051837644  | 0.038188866 | 0.176885374 |
| lysopcac204.asparticacid | 0.026106598  | 0.019232773 | 0.176885499 |
| pcaec445.pcaac402        | 0.041172234  | 0.030334563 | 0.176926777 |
| pcaec384.c2              | 0.062988806  | 0.046413836 | 0.176977062 |
| pcaac426.pcaec364        | 0.020462621  | 0.015080292 | 0.177040876 |
| pcaac321.c162            | -0.08759564  | 0.064555877 | 0.177045609 |
| methionine.pcaac362      | 0.028289386  | 0.020851402 | 0.177103504 |
| pcaac406.pcaec445        | 0.084297087  | 0.0621358   | 0.177120931 |
| serine.pcaac281          | 0.003975554  | 0.002930496 | 0.177135047 |
| c101.pcaec424            | 0.015352292  | 0.011316682 | 0.177137355 |
| pcaec423.pcaac343        | 0.023838057  | 0.017571849 | 0.177138043 |
| pcaec365.pcaec444        | 0.107850075  | 0.079505686 | 0.177168895 |
| c0.smc180                | -0.018346726 | 0.01352673  | 0.177224878 |



|                              |              |             |             |
|------------------------------|--------------|-------------|-------------|
| citrusline.pcaac403          | -0.017645605 | 0.013012268 | 0.177306354 |
| pcaac366.pcaac385            | -0.053609014 | 0.039539783 | 0.177385639 |
| pcaec420.pcaac405            | -0.043277813 | 0.031928391 | 0.177499908 |
| pcaec380.pcaec424            | -0.034397723 | 0.025381917 | 0.177582201 |
| pcaac362.smohc221            | 0.024043269  | 0.017741671 | 0.177588431 |
| pcaac321.pcaac405            | 0.074283408  | 0.054822834 | 0.177656501 |
| lysopcac160.acetylornithoine | -0.09791565  | 0.072268004 | 0.177680587 |
| pcaac386.pcaec322            | -0.059767032 | 0.044120328 | 0.177763    |
| lysopcac204.smohc241         | 0.101012111  | 0.074567817 | 0.177763938 |
| pcaec362.pcaec361            | -0.011702288 | 0.008639131 | 0.17778504  |
| c3.pcaec444                  | -0.084145502 | 0.06212362  | 0.177811421 |
| pcaec384.smc161              | -0.058939575 | 0.04351811  | 0.177848294 |
| c5.pcaec360                  | 0.008693657  | 0.006419583 | 0.177889288 |
| pcaac406.c162                | -0.051413934 | 0.037965221 | 0.177890039 |
| lysopcac161.c162             | -0.084449008 | 0.062365476 | 0.177934276 |
| pcaec365.pcaac384            | -0.056877508 | 0.042007056 | 0.177966031 |
| c2.pcaac341                  | -0.007683864 | 0.005676931 | 0.178117092 |
| smc240.pcaec363              | -0.026123771 | 0.01930109  | 0.178129064 |
| c10.c51dc                    | 0.141409218  | 0.104517666 | 0.178293876 |
| smohc141.pcaac402            | -0.081039302 | 0.059898117 | 0.178299334 |
| pcaac300.pcaac381            | -0.043593492 | 0.032225992 | 0.178366023 |
| smc260.citrusline            | 0.016543957  | 0.012230368 | 0.178381426 |
| citrusline.pcaec300          | 0.005253365  | 0.003883953 | 0.178417438 |
| pcaec385.c18                 | -0.034853689 | 0.025774356 | 0.178519401 |
| pcaac322.pcaec424            | -0.007741923 | 0.005726052 | 0.178586333 |
| pcaec443.pcaac281            | -0.003835796 | 0.002837727 | 0.178694235 |
| pcaac343.pcaec380            | -0.085586138 | 0.063322663 | 0.178734676 |
| c2.pcaec364                  | -0.010921966 | 0.008082835 | 0.178841187 |
| pcaec405.pcaec300            | 0.01613923   | 0.011944741 | 0.178871992 |
| lysopcac140.asparagine       | 0.009797573  | 0.007252895 | 0.178970425 |
| pcaac281.lysopcac181         | 0.039746178  | 0.02943739  | 0.179180243 |
| pcaec384.pcaac402            | 0.027215931  | 0.02016032  | 0.179250164 |
| smc180.lysopcac160           | -0.017590859 | 0.013031422 | 0.17928054  |
| c141.pcaac403                | -0.005005061 | 0.003707957 | 0.179300987 |
| lysopcac181.lysopcac170      | 0.056444286  | 0.041820595 | 0.17934566  |
| lysopcac281.lysopcac170      | 0.028154214  | 0.020864457 | 0.179438644 |
| acetylornithoine.pcaac323    | -0.111696224 | 0.082801385 | 0.17957342  |
| c51.smc181                   | -0.02258874  | 0.016749508 | 0.179683837 |
| pcaec402.c2                  | 0.079811082  | 0.059185914 | 0.179728758 |
| pcaec360.pcaac426            | 0.077961726  | 0.057818636 | 0.179759857 |
| smc260.c14                   | 0.089026807  | 0.066043755 | 0.179883895 |
| leucine.pcaac240             | 0.017669279  | 0.013111237 | 0.179997316 |
| pcaac426.c14                 | 0.049548079  | 0.036766795 | 0.180001422 |
| methionine.c2                | -0.068708586 | 0.0509887   | 0.180035261 |
| phenylalanine.pcaec401       | 0.059285822  | 0.043996817 | 0.180042709 |

|                            |              |             |             |
|----------------------------|--------------|-------------|-------------|
| phenylalanine.lysopcac161  | 0.09931028   | 0.073705677 | 0.1800789   |
| pcaac405.pcaac323          | -0.1288742   | 0.095657582 | 0.180125409 |
| lysopcac160.c51dc          | -0.144760378 | 0.107450006 | 0.180128716 |
| glycine.c0                 | -0.000611739 | 0.000454153 | 0.180207961 |
| pcaec363.citruline         | 0.019739373  | 0.014655453 | 0.180237483 |
| c14.valine                 | -0.071093124 | 0.052783284 | 0.18024039  |
| pcaac360.pcaac380          | 0.14112558   | 0.104798686 | 0.180321403 |
| smohc222.smohc221          | 0.063592039  | 0.047224844 | 0.180339028 |
| pcaec322.lysopcac160       | -0.018700713 | 0.013889757 | 0.180407517 |
| pcaac361.kynurenine        | -0.006056654 | 0.004498991 | 0.180453276 |
| serotonin.pcaec445         | 0.054800843  | 0.040708116 | 0.180464616 |
| pcaac300.pcaec384          | 0.060595567  | 0.045014982 | 0.180487004 |
| ornithine.prolinr          | 0.042219054  | 0.031363819 | 0.180491201 |
| arginine.pcaec445          | 0.043605612  | 0.032399449 | 0.180565793 |
| pcaac320.pcaac404          | 0.007794892  | 0.005791754 | 0.180570513 |
| pcaec364.pcaec404          | -0.017844066 | 0.013260182 | 0.180626038 |
| h1.pcaac406                | -0.116858671 | 0.086842701 | 0.180642713 |
| acetylmithoine.lysopcac180 | 0.077954728  | 0.057932354 | 0.18064903  |
| c2.c102                    | 0.055792874  | 0.041465266 | 0.180675968 |
| pcaec445.c5                | -0.012164463 | 0.00904382  | 0.180828809 |
| citruline.lysopcac203      | -0.010705953 | 0.007960328 | 0.180875376 |
| serotonin.smc181           | 0.029138973  | 0.021667744 | 0.180909128 |
| pcaac300.tyrosine          | 0.053073329  | 0.039481637 | 0.181088132 |
| lysine.lysopcac160         | -0.018788312 | 0.013977727 | 0.181118048 |
| pcaec425.pcaac300          | -0.042204109 | 0.031409602 | 0.181276677 |
| pcaec446.c141              | -0.026837634 | 0.019979998 | 0.18141998  |
| smc180.c162                | -0.119414172 | 0.088911094 | 0.181468794 |
| c181.smohc221              | 0.030802341  | 0.02295342  | 0.181832082 |
| c16.smc202                 | -0.017197775 | 0.012819763 | 0.181976074 |
| smc261.smohc161            | -0.020760915 | 0.015479025 | 0.182065437 |
| lysopcac161.pcaec300       | 0.030741788  | 0.022922674 | 0.182104477 |
| pcaec364.pcaac404          | 0.00527564   | 0.003935138 | 0.182253152 |
| kynurenine.glycine         | -0.023199144 | 0.017304864 | 0.182264578 |
| pcaec424.lysopcac181       | 0.080130692  | 0.059783889 | 0.182353634 |
| pcaec446.lysopcac280       | 0.007045191  | 0.005256575 | 0.182378436 |
| c182.lysopcac204           | 0.027098188  | 0.020219362 | 0.182395584 |
| citruline.pcaac344         | -0.062195312 | 0.046412629 | 0.182446928 |
| c0.pcaac404                | 0.005820024  | 0.004343929 | 0.182526402 |
| pcaec300.pcaac403          | -0.029889667 | 0.022309121 | 0.182529848 |
| pcaac240.pcaec322          | 0.066090464  | 0.049331811 | 0.182556746 |
| pcaac426.lysopcac280       | 0.006954504  | 0.005191167 | 0.182567341 |
| pcaec401.pcaec424          | -0.010058371 | 0.007509413 | 0.182646924 |
| c14.pcaec322               | -0.043434824 | 0.03243368  | 0.182726802 |
| creatinine.pcaac365        | 0.038066053  | 0.028431709 | 0.18283389  |
| smc161.lysopcac160         | -0.032648584 | 0.024387116 | 0.18286491  |

|                                |              |             |             |
|--------------------------------|--------------|-------------|-------------|
| pcaec425.pcaec385              | -0.073760993 | 0.055097713 | 0.182875641 |
| c141.smc260                    | 0.041673044  | 0.031128819 | 0.182876241 |
| smohc222.pcaec443              | 0.090269942  | 0.067446255 | 0.182983657 |
| smc161.smc202                  | -0.051854423 | 0.038746636 | 0.183017237 |
| pcaac404.pcaec424              | -0.008628007 | 0.006447323 | 0.183037995 |
| smohc222.smc202                | -0.095858516 | 0.071643762 | 0.183116884 |
| pcaac240.isoleucine            | -0.019639703 | 0.014681757 | 0.183212501 |
| c8.pcaac300                    | -0.056068612 | 0.041919566 | 0.183266465 |
| asparagine.pcaac322            | 0.057163871  | 0.042740506 | 0.183287562 |
| lysopcac140.lysopcac160        | -0.021857504 | 0.016343312 | 0.183309073 |
| putrescine.transhydroxyproline | -0.034438122 | 0.025750748 | 0.183319992 |
| pcaac361.c51dc                 | -0.133523677 | 0.099866723 | 0.183432371 |
| lysopcac161.pcaec424           | -0.012957626 | 0.009694759 | 0.183581788 |
| c16.pcaac426                   | 0.072618155  | 0.054351537 | 0.183737272 |
| isoleucine.pcaac344            | 0.073996688  | 0.055402433 | 0.18388766  |
| pcaec401.pcaac385              | -0.049391885 | 0.036982299 | 0.183909486 |
| c14.lysopcac204                | 0.030050235  | 0.022500452 | 0.183914548 |
| pcaac366.pcaec424              | -0.008502466 | 0.006366729 | 0.183942748 |
| c4.citruline                   | 0.011035201  | 0.008264162 | 0.183989992 |
| c101.pcaec380                  | -0.079194486 | 0.05932478  | 0.184113052 |
| lysopcac203.pcaec424           | -0.00685     | 0.005132905 | 0.184244996 |
| pcaec422.lysopcac170           | 0.013209271  | 0.009898771 | 0.18427491  |
| creatinine.pcaec340            | 0.068054355  | 0.051000742 | 0.184293105 |
| lysopcac280.pcaac381           | 0.039108144  | 0.029310256 | 0.184325067 |
| pcaac341.pcaac322              | 0.098897023  | 0.074131816 | 0.184394351 |
| pcaac383.pcaec380              | 0.041338624  | 0.030988452 | 0.18441688  |
| lysopcac180.glycine            | -0.019930692 | 0.014943665 | 0.184508156 |
| c51dc.leucine                  | 0.026988359  | 0.020237211 | 0.184547761 |
| smc202.pcaac420                | 0.071598588  | 0.053691666 | 0.184576112 |
| creatinine.pcaec380            | -0.050872245 | 0.038161084 | 0.184714116 |
| pcaec340.smc181                | 0.04009803   | 0.030080014 | 0.184729394 |
| pcaac240.glutamicacid          | -0.071983385 | 0.054004863 | 0.184775207 |
| pcaac362.c102                  | 0.047461427  | 0.03560992  | 0.184804946 |
| c2.pcaac404                    | 0.002407668  | 0.001806882 | 0.18490848  |
| c141.c102                      | 0.043308263  | 0.032503422 | 0.184933691 |
| lysopcac140.c14                | 0.057930871  | 0.043495919 | 0.18511475  |
| c181.tyrosine                  | -0.075932391 | 0.057013257 | 0.185125138 |
| pcaac403.acetylmithoine        | -0.060129707 | 0.045153114 | 0.185175242 |
| smohc221.pcaec363              | -0.034188568 | 0.025674309 | 0.185194578 |
| smc261.citruline               | 0.007666901  | 0.005758073 | 0.185234297 |
| pcaac385.pcaac425              | -0.111424755 | 0.083684349 | 0.185239532 |
| lysopcac181.phenylalanine      | -0.080958478 | 0.060803791 | 0.185245332 |
| pcaec405.spermidine            | -0.067548502 | 0.050732875 | 0.185250789 |
| pcaec404.pcaac343              | 0.020419281  | 0.015338741 | 0.185326727 |
| lysopcac203.pcaac381           | -0.035762801 | 0.0268649   | 0.185331192 |

|                           |              |             |             |
|---------------------------|--------------|-------------|-------------|
| c16.lysopcac160           | 0.030812513  | 0.023147276 | 0.185350363 |
| citruline.c18             | -0.028341437 | 0.02129581  | 0.185450469 |
| pcaec321.pcaec425         | -0.030864061 | 0.023194429 | 0.185509146 |
| isoleucine.pcaec301       | 0.048808905  | 0.036685799 | 0.18557787  |
| serotonin.smcl80          | 0.014376131  | 0.010808573 | 0.185706093 |
| pcaac405.pcaac281         | 0.002729433  | 0.002052416 | 0.185773006 |
| lysopcac181.pcaec444      | -0.1370623   | 0.103088236 | 0.185871913 |
| pcaac360.pcaec402         | 0.068470563  | 0.051503552 | 0.185914377 |
| prolinr.pcaec364          | -0.0194184   | 0.014607988 | 0.18595835  |
| isoleucine.c18            | 0.04511772   | 0.033959054 | 0.186191454 |
| serine.smohc221           | -0.050942893 | 0.038353819 | 0.186308881 |
| glutamine.citruline       | 0.007511296  | 0.005655489 | 0.186339417 |
| pcaac342.pcaac420         | 0.067248439  | 0.050634631 | 0.186349617 |
| pcaec342.pcaec445         | 0.04394214   | 0.033090761 | 0.186410177 |
| pcaac323.glycine          | -0.041588115 | 0.031330708 | 0.186586956 |
| kynurenine.lysopcac204    | 0.021958902  | 0.016545229 | 0.186648629 |
| c16.pcaec363              | -0.005341274 | 0.004024703 | 0.186675654 |
| pcaec444.pcaec343         | 0.10704674   | 0.080661024 | 0.186676988 |
| c102.pcaac381             | -0.022544643 | 0.016989166 | 0.186715699 |
| c51dc.pcaec382            | -0.010673315 | 0.0080433   | 0.186721997 |
| pcaac366.kynurenine       | -0.015675219 | 0.011813136 | 0.186738759 |
| pcaac363.kynurenine       | -0.01044559  | 0.007872418 | 0.18676257  |
| lysopcac280.prolinr       | -0.029927996 | 0.022559386 | 0.186837641 |
| asparagine.c5             | 0.012747411  | 0.009610089 | 0.186893892 |
| c51dc.histidine           | 0.088828978  | 0.066970062 | 0.186914687 |
| pcaec342.pcaec343         | 0.134476757  | 0.101384916 | 0.186914774 |
| pcaec420.lysopcac204      | -0.036779764 | 0.027733678 | 0.186987805 |
| lysopcac204.pcaac381      | -0.02800866  | 0.021125376 | 0.187102372 |
| pcaac402.c181             | 0.032221864  | 0.024307864 | 0.187187148 |
| h1.citruline              | 0.010591681  | 0.007991186 | 0.187237808 |
| pcaac344.c5               | -0.011635941 | 0.008780862 | 0.187327931 |
| c142.leucine              | 0.009337237  | 0.007047073 | 0.18738314  |
| pcaac281.spermidine       | 0.070508724  | 0.053217386 | 0.187403645 |
| c0.pcaec422               | -0.024633977 | 0.018594064 | 0.187433039 |
| lysopcac182.asparticacid  | 0.021102442  | 0.015929937 | 0.187474976 |
| pcaec322.c141oh           | 0.105662931  | 0.079772351 | 0.187523822 |
| c141oh.smohc221           | 0.066654132  | 0.050332695 | 0.187618094 |
| c182.taurine              | -0.045761665 | 0.034557072 | 0.187630218 |
| c2.pcaac425               | 0.046210082  | 0.03489765  | 0.187654771 |
| pcaec401.pcaac403         | 0.02797772   | 0.021136055 | 0.187808446 |
| c16.pcaec380              | -0.04624368  | 0.034936402 | 0.187822766 |
| pcaec340.lysopcac181      | 0.041271024  | 0.031181    | 0.187841964 |
| c5.smohc161               | -0.017300919 | 0.013071605 | 0.18785707  |
| pcaac281.c51dc            | -0.125392785 | 0.09474127  | 0.187864045 |
| acetylorlithoine.pcaac380 | -0.059994567 | 0.045336487 | 0.187934033 |

|                        |              |             |             |
|------------------------|--------------|-------------|-------------|
| smc261.pcaec404        | 0.018746148  | 0.014166041 | 0.187934553 |
| lysopcac280.pcaec404   | 0.015518419  | 0.011727176 | 0.187944151 |
| lysopcac161.pcaac385   | 0.034496444  | 0.026078194 | 0.188103001 |
| lysopcac280.pcaac404   | 0.004872137  | 0.00368405  | 0.188206956 |
| pcaac323.c5            | -0.022120247 | 0.016727054 | 0.188230652 |
| smc260.smohc221        | -0.043269131 | 0.032725966 | 0.188316389 |
| c51.c5                 | -0.006657403 | 0.005035532 | 0.188342921 |
| smc160.histidine       | 0.049142852  | 0.037175323 | 0.188397358 |
| pcaac362.pcaec340      | 0.079421884  | 0.060081444 | 0.188403206 |
| pcaac240.pcaac380      | 0.066784735  | 0.050530515 | 0.188480393 |
| pcaec301.pcaec444      | 0.127032239  | 0.096122482 | 0.188515282 |
| pcaac322.pcaec383      | -0.083085599 | 0.062880191 | 0.188593225 |
| smc160.c2              | 0.051236992  | 0.038778982 | 0.188618188 |
| c0.pcaac344            | 0.075817061  | 0.057386595 | 0.188649271 |
| c162.pcaac406          | 0.053773899  | 0.040708201 | 0.188716908 |
| pcaac323.pcaac320      | -0.099595113 | 0.075417805 | 0.18884385  |
| c16.smohc241           | 0.106349703  | 0.080533125 | 0.188846291 |
| putrescine.pcaac421    | 0.023013178  | 0.017430489 | 0.188942108 |
| pcaec341.lysopcac204   | -0.024001926 | 0.018179925 | 0.188955288 |
| pcaac406.pcaec360      | 0.003460061  | 0.002621283 | 0.189040514 |
| pcaec445.histidine     | 0.04632384   | 0.035094543 | 0.189045412 |
| pcaec401.lysopcac203   | -0.025344512 | 0.019205899 | 0.189162478 |
| lysopcac182.pcaac406   | 0.032506463  | 0.02463616  | 0.189215717 |
| pcaec361.arginine      | -0.081992098 | 0.062141936 | 0.189225334 |
| lysopcac180.pcaac406   | 0.032967677  | 0.024987454 | 0.189246479 |
| pcaac281.pcaac384      | -0.091885726 | 0.069644629 | 0.189252462 |
| lysopcac182.smc180     | 0.040309234  | 0.030558    | 0.189334284 |
| c142.pcaec341          | 0.053215128  | 0.040343953 | 0.189357525 |
| asparagine.pcaec445    | 0.113673722  | 0.086191024 | 0.189416887 |
| lysopcac140.pcaec406   | -0.042751327 | 0.032415782 | 0.189421898 |
| c8.pcaac386            | 0.023181601  | 0.017587042 | 0.189667498 |
| lysopcac182.pcaec420   | 0.049049122  | 0.037218862 | 0.189751072 |
| pcaec425.pcaac343      | 0.015023709  | 0.011400683 | 0.189773236 |
| c10.smc202             | -0.05445774  | 0.041325067 | 0.189773466 |
| c182.c0                | -0.000724585 | 0.000550038 | 0.189924483 |
| c3.smc202              | 0.0664904    | 0.050474376 | 0.189933659 |
| phenylalanine.arginine | 0.054703456  | 0.041529883 | 0.189968045 |
| asparticacid.pcaac406  | 0.070937159  | 0.053854244 | 0.18996825  |
| pcaac343.pcaec382      | 0.017332588  | 0.01315863  | 0.189969386 |
| asparagine.pcaac344    | 0.035553804  | 0.026994104 | 0.190005454 |
| pcaec424.pcaec364      | 0.009507084  | 0.007219587 | 0.190088803 |
| pcaec382.lysopcac161   | 0.05033526   | 0.038224542 | 0.190093796 |
| pcaec420.pcaac426      | -0.050376141 | 0.038257637 | 0.190117385 |
| c10.pcaac300           | -0.054351113 | 0.041278413 | 0.190138988 |
| c3.prolinr             | 0.015659     | 0.011892872 | 0.190147244 |

|                                    |              |             |             |
|------------------------------------|--------------|-------------|-------------|
| kynurenine.c18                     | -0.039636129 | 0.030107941 | 0.190215318 |
| prolinr.pcaac405                   | -0.059330577 | 0.045080294 | 0.190335335 |
| pcaac281.pcaec322                  | -0.083659175 | 0.063572952 | 0.190386693 |
| lysopcac182.lysopcac203            | -0.013120365 | 0.009971073 | 0.190424396 |
| citruiline.pcaac321                | -0.02894615  | 0.022000365 | 0.190468128 |
| pcaec443.lysopcac204               | -0.08746875  | 0.066484527 | 0.190497129 |
| smohc241.pcaec404                  | 0.011002653  | 0.008363348 | 0.190512416 |
| pcaec362.citruiline                | 0.010821861  | 0.008226501 | 0.190543299 |
| pcaac424.citruiline                | -0.007670361 | 0.005831311 | 0.190581122 |
| pcaec341.phenylalanine             | -0.050353186 | 0.038282844 | 0.190608312 |
| pcaac362.kynurenine                | -0.007503305 | 0.005705651 | 0.190684735 |
| pcaac424.smohc221                  | -0.114588235 | 0.087144438 | 0.190732528 |
| pcaec362.smc181                    | 0.012278578  | 0.009338303 | 0.190753068 |
| pcaac425.c14                       | 0.062886147  | 0.04783251  | 0.190802094 |
| smohc222.pcaac405                  | -0.046377599 | 0.035279443 | 0.190848047 |
| pcaec300.c2                        | 0.062373655  | 0.047447974 | 0.190851118 |
| pcaec381.pcaec424                  | -0.02287157  | 0.017402362 | 0.190948335 |
| smc202.pcaec364                    | -0.026991281 | 0.020538989 | 0.190992344 |
| h1.glycine                         | -0.034782507 | 0.02646883  | 0.191010909 |
| lysopcac170.pcaec364               | 0.019609765  | 0.014928719 | 0.191189914 |
| pcaac320.pcaac323                  | -0.052480778 | 0.039958225 | 0.191246584 |
| pcaec363.leucine                   | 0.011352366  | 0.00864493  | 0.191316832 |
| c4.pcaec384                        | 0.085571985  | 0.065167033 | 0.191338435 |
| asymmetricdimethylarginine.pcaec44 | 0.066793969  | 0.050871881 | 0.191383346 |
| methioninesulfoxide.asparticacid   | 0.090799963  | 0.069165904 | 0.191450242 |
| pcaac401.h1                        | 0.006441506  | 0.004907841 | 0.191548533 |
| h1.pcaec300                        | -0.017568787 | 0.013386753 | 0.191579407 |
| pcaac322.pcaac404                  | 0.003195411  | 0.002434864 | 0.191594085 |
| alanine.pcaec342                   | 0.078355569  | 0.05970827  | 0.191611052 |
| pcaac321.pcaec424                  | -0.01134716  | 0.008646921 | 0.191620875 |
| pcaac341.histidine                 | 0.04743251   | 0.036146501 | 0.191637008 |
| smc161.pcaec445                    | 0.042348859  | 0.032273281 | 0.191648438 |
| methioninesulfoxide.phenylalanine  | -0.131435934 | 0.100176999 | 0.191701798 |
| pcaac401.arginine                  | -0.073484757 | 0.056008357 | 0.191703499 |
| pcaac344.glycine                   | 0.036012472  | 0.027450402 | 0.191744367 |
| alanine.smc240                     | 0.046898198  | 0.035748065 | 0.19174499  |
| pcaac426.smc261                    | 0.06963204   | 0.053077243 | 0.191747886 |
| pcaec300.pcaec405                  | -0.069298571 | 0.052826392 | 0.191775777 |
| pcaec321.valine                    | 0.089327166  | 0.068098012 | 0.191800389 |
| glutamine.pcaec446                 | 0.099762577  | 0.076062392 | 0.191852692 |
| methionine.smc261                  | 0.033585487  | 0.025612582 | 0.191953759 |
| pcaec380.pcaec301                  | 0.128993132  | 0.098402096 | 0.19209213  |
| putrescine.pcaec383                | -0.054048096 | 0.041233205 | 0.192121558 |
| pcaec321.smc180                    | -0.021868961 | 0.016692257 | 0.192345626 |
| c141oh.smc202                      | -0.049310672 | 0.037640102 | 0.192368973 |

|                                 |              |             |             |
|---------------------------------|--------------|-------------|-------------|
| pcaec443.citruline              | -0.009986617 | 0.007623266 | 0.192381997 |
| pcaec300.lysopcac181            | 0.046781761  | 0.035717431 | 0.192464407 |
| c2.leucine                      | 0.007024422  | 0.005363133 | 0.19246877  |
| lysopcac203.pcaac344            | 0.061849874  | 0.047222334 | 0.192469482 |
| pcaac384.pcaac404               | 0.015435877  | 0.011785565 | 0.192480139 |
| phenylalanine.smc160            | -0.061247538 | 0.046775249 | 0.192590447 |
| smohc141.histidine              | 0.060311465  | 0.046069064 | 0.192673965 |
| c14.pcaec362                    | 0.024443265  | 0.018678152 | 0.192842152 |
| c2.pcaec424                     | 0.018241735  | 0.013940747 | 0.192888197 |
| asymmetricdimethylarginine.c162 | -0.085634475 | 0.065454255 | 0.192958834 |
| alphaaminoadipicacid.pcaec382   | -0.008566752 | 0.006550478 | 0.193129534 |
| pcaac385.valine                 | -0.064343919 | 0.04920028  | 0.193132852 |
| pcaac364.prolinr                | 0.052678716  | 0.040283116 | 0.19316119  |
| pcaec362.putrescine             | 0.048961118  | 0.037442667 | 0.193189278 |
| lysopcac161.asparticacid        | 0.031107817  | 0.023790607 | 0.193210216 |
| pcaec362.leucine                | 0.017770357  | 0.013590627 | 0.193217699 |
| pcaac406.pcaac405               | -0.063382171 | 0.04847542  | 0.19322904  |
| c162.pcaec362                   | 0.011710272  | 0.008956741 | 0.193258128 |
| pcaec403.c0                     | 0.001348778  | 0.001031711 | 0.193293487 |
| pcaec446.pcaac323               | -0.075880852 | 0.058062289 | 0.193440504 |
| c10.lysopcac280                 | -0.010536898 | 0.008064406 | 0.193540074 |
| pcaec321.lysopcac281            | 0.02160563   | 0.016537677 | 0.19358897  |
| lysopcac181.lysopcac280         | 0.01405301   | 0.010757162 | 0.193610128 |
| putrescine.pcaac425             | -0.08153799  | 0.062443081 | 0.193810001 |
| citruline.pcaec405              | -0.05673485  | 0.043457454 | 0.193901844 |
| pcaac363.putrescine             | 0.027025659  | 0.020702709 | 0.193939087 |
| pcaac405.c102                   | 0.032353157  | 0.024784343 | 0.193949162 |
| c182.lysopcac161                | -0.094153099 | 0.072147038 | 0.194074797 |
| creatinine.citruline            | 0.019012455  | 0.0145709   | 0.194140385 |
| glycine.pcaec424                | 0.00815576   | 0.006251773 | 0.19423285  |
| pcaec405.pcaac404               | -0.009937167 | 0.007618725 | 0.194315487 |
| pcaec382.c141oh                 | 0.112830573  | 0.086522908 | 0.194401836 |
| asparticacid.c5                 | -0.008569841 | 0.006571925 | 0.194417669 |
| isoleucine.lysopcac180          | -0.059255744 | 0.045463466 | 0.194634407 |
| pcaec364.c8                     | -0.055724345 | 0.042770914 | 0.194809554 |
| pcaac422.citruline              | -0.010238449 | 0.007860919 | 0.194948061 |
| c51.smc180                      | -0.008618282 | 0.006618806 | 0.195070511 |
| smohc241.c162                   | -0.087155794 | 0.066937463 | 0.195084839 |
| pcaec382.acetylmithoine         | -0.095796547 | 0.073598894 | 0.195236566 |
| pcaac322.kynurenine             | -0.013289682 | 0.010210466 | 0.195246308 |
| pcaac323.prolinr                | 0.008703701  | 0.006687724 | 0.195290688 |
| pcaac361.histidine              | 0.053118953  | 0.04081812  | 0.195320457 |
| pcaac385.smc161                 | -0.051112895 | 0.039281648 | 0.195377425 |
| lysopcac204.tyrosine            | -0.044381758 | 0.034116113 | 0.19547541  |
| c182.pcaec404                   | -0.009405148 | 0.007229713 | 0.195475778 |

|                              |              |             |             |
|------------------------------|--------------|-------------|-------------|
| c14.citruline                | 0.009386999  | 0.007215839 | 0.195480569 |
| lysopcac281.lysopcac160      | -0.044512941 | 0.034218069 | 0.195489898 |
| pcaac361.pcaec343            | 0.104543555  | 0.080370392 | 0.195520186 |
| histidine.c8                 | -0.060988056 | 0.046888844 | 0.195546686 |
| pcaac403.pcaec382            | -0.034100515 | 0.026219539 | 0.195586951 |
| c51dc.smohc241               | 0.060987398  | 0.046903747 | 0.195692644 |
| pcaec322.pcaac366            | -0.056887115 | 0.043752217 | 0.195711791 |
| pcaec443.pcaac362            | -0.051685125 | 0.039752438 | 0.195724121 |
| pcaac402.citruline           | -0.010356741 | 0.007966543 | 0.195773823 |
| pcaec385.pcaec404            | -0.009583411 | 0.007372409 | 0.195817308 |
| c141oh.pcaec360              | 0.008810278  | 0.006777834 | 0.195829615 |
| asparagine.pcaac402          | 0.05562373   | 0.042792649 | 0.195837531 |
| smc160.pcaec425              | -0.024591627 | 0.018919047 | 0.195840554 |
| pcaec341.pcaac386            | 0.015283879  | 0.011759589 | 0.195888167 |
| pcaec402.pcaec444            | 0.160157363  | 0.123243348 | 0.19594755  |
| acetylmornithoine.pcaec405   | -0.050459699 | 0.038836078 | 0.196023418 |
| pcaac360.smc202              | -0.04598587  | 0.035393776 | 0.196035471 |
| pcaac344.smc240              | 0.04132377   | 0.03180763  | 0.196065042 |
| lysopcac160.asparticacid     | 0.019791913  | 0.01523677  | 0.196140531 |
| pcaec405.citruline           | -0.008725413 | 0.0067181   | 0.196197136 |
| pcaec381.pcaac381            | 0.032973741  | 0.025406228 | 0.19651615  |
| smc241.smc160                | -0.167062018 | 0.128721811 | 0.196518657 |
| serotonin.methionine         | 0.031773923  | 0.024482743 | 0.196533823 |
| pcaec300.lysopcac160         | -0.020503573 | 0.015800804 | 0.196595706 |
| c2.smohc222                  | -0.061939443 | 0.047732854 | 0.196596183 |
| pcaac281.pcaac343            | -0.041088269 | 0.031665228 | 0.196611205 |
| pcaec343.citruline           | 0.011630621  | 0.008963707 | 0.196631681 |
| c101.c51dc                   | 0.142720742  | 0.110013255 | 0.196706633 |
| pcaac366.smohc161            | -0.016617026 | 0.012809761 | 0.196737163 |
| asparticacid.pcaac420        | 0.099297455  | 0.076546711 | 0.196737882 |
| smohc161.pcaec361            | -0.017832075 | 0.013747033 | 0.196757007 |
| methionine.pcaac426          | -0.035753743 | 0.027573867 | 0.196930274 |
| pcaac321.smc240              | 0.0398625    | 0.0307451   | 0.196966351 |
| pcaec365.transhydroxyproline | -0.066708306 | 0.051456291 | 0.197014726 |
| asparagine.c182              | 0.073278726  | 0.056534801 | 0.197096103 |
| pcaec444.pcaec342            | -0.116555598 | 0.089927597 | 0.197118553 |
| pcaac386.c2                  | 0.077274966  | 0.059622137 | 0.197127635 |
| pcaac365.pcaec405            | -0.052714036 | 0.040674808 | 0.197158936 |
| c2.tyrosine                  | 0.066646093  | 0.051429278 | 0.197196342 |
| lysopcac203.histidine        | 0.082449187  | 0.063625663 | 0.197206815 |
| smohc161.pcaac421            | -0.03038901  | 0.023451394 | 0.197213127 |
| c142.pcaec382                | -0.011388917 | 0.008789002 | 0.19721831  |
| pcaec340.pcaec382            | -0.011517248 | 0.008888266 | 0.197229731 |
| pcaec342.pcaac420            | 0.051406691  | 0.039689796 | 0.197425513 |
| c0.c3                        | -0.026924421 | 0.020787764 | 0.197427764 |



|                              |              |             |             |
|------------------------------|--------------|-------------|-------------|
| c162.leucine                 | 0.008558706  | 0.006608066 | 0.197432728 |
| pcaec420.smc160              | -0.064586604 | 0.049867093 | 0.197438221 |
| pcaec362.pcaac322            | 0.070716804  | 0.054607648 | 0.197498989 |
| pcaec361.lysopcac161         | 0.062540556  | 0.04829834  | 0.19753963  |
| pcaac320.pcaec361            | -0.0110247   | 0.008514551 | 0.197564741 |
| smc240.leucine               | 0.007676886  | 0.005929597 | 0.197611072 |
| serine.pcaec364              | 0.013914495  | 0.010748601 | 0.197656597 |
| pcaac404.smc161              | -0.040660786 | 0.03141508  | 0.197736552 |
| pcaec343.pcaec382            | -0.011819112 | 0.009132401 | 0.197775262 |
| lysopcac161.pcaac426         | -0.094232189 | 0.072815448 | 0.197800009 |
| asparticacid.c0              | 0.000667799  | 0.000516052 | 0.197823854 |
| pcaec383.c0                  | 0.001174609  | 0.000907809 | 0.197878901 |
| pcaac384.pcaac425            | 0.08371804   | 0.064705167 | 0.197898191 |
| lysopcac160.histidine        | 0.064036548  | 0.049494664 | 0.197909024 |
| histidine.pcaec445           | 0.069213704  | 0.05349651  | 0.197911997 |
| methioninesulfoxide.pcaac364 | 0.132755085  | 0.102614596 | 0.197937262 |
| c181.taurine                 | -0.067625298 | 0.052272055 | 0.197939733 |
| pcaec422.c4                  | -0.038319834 | 0.029626944 | 0.198045316 |
| pcaac403.pcaec364            | 0.005712957  | 0.004417331 | 0.198082033 |
| pcaac363.pcaec300            | 0.004665617  | 0.003608164 | 0.198162349 |
| smc180.lysopcac180           | 0.082681794  | 0.063944011 | 0.198175441 |
| pcaec402.pcaec322            | 0.080034555  | 0.061899773 | 0.198197556 |
| pcaec424.pcaec382            | -0.023167224 | 0.017918175 | 0.198206032 |
| pcaac342.citruline           | 0.016255805  | 0.012573148 | 0.198222217 |
| smc241.smc180                | -0.013674422 | 0.010578033 | 0.198284248 |
| pcaec341.pcaec322            | -0.065646219 | 0.050796679 | 0.198417409 |
| smc181.tyrosine              | -0.073055995 | 0.056532304 | 0.198433057 |
| lysopcac161.smc181           | -0.02081437  | 0.016108174 | 0.198476418 |
| asparticacid.lysopcac180     | 0.08190722   | 0.063395489 | 0.198530995 |
| methionine.kynurenine        | -0.014867385 | 0.011507272 | 0.198532652 |
| pcaec401.lysopcac180         | 0.075957679  | 0.058797283 | 0.198581744 |
| acetylnithoine.phenylalanine | 0.071687467  | 0.055502933 | 0.198671267 |
| pcaac422.pcaac405            | -0.072816263 | 0.056387353 | 0.198754118 |
| pcaec343.pcaac386            | -0.01491433  | 0.011551525 | 0.198838643 |
| pcaac406.pcaac403            | 0.034881372  | 0.027018182 | 0.198866394 |
| pcaec301.pcaec342            | 0.107741691  | 0.083456512 | 0.198880654 |
| c8.spermidine                | 0.067483909  | 0.0522762   | 0.198908755 |
| pcaec301.pcaac320            | -0.080039102 | 0.062016992 | 0.199016397 |
| c10.lysopcac204              | 0.024083756  | 0.018666884 | 0.199159417 |
| c141.smc202                  | -0.044385318 | 0.034403561 | 0.199176349 |
| smohc222.pcaac404            | 0.007619725  | 0.005907459 | 0.199276474 |
| pcaac321.kynurenine          | -0.01711509  | 0.013273127 | 0.199412887 |
| pcaac403.prolinr             | -0.034566277 | 0.026810193 | 0.199467715 |
| asparagine.asparticacid      | 0.042229782  | 0.032759246 | 0.19953738  |
| pcaec386.pcaec444            | 0.122753409  | 0.095230814 | 0.199567091 |

|                                   |              |             |             |
|-----------------------------------|--------------|-------------|-------------|
| smohc221.histidine                | 0.060143251  | 0.046668351 | 0.199661367 |
| pcaac323.lysopcac280              | 0.010337337  | 0.008021692 | 0.199683736 |
| lysopcac160.pcaec363              | 0.019294463  | 0.014976444 | 0.199805923 |
| phenylalanine.transhydroxyproline | -0.039354763 | 0.030548826 | 0.199827752 |
| lysine.pcaec340                   | 0.04179561   | 0.032444534 | 0.199841797 |
| kynurenine.pcaac420               | 0.112493593  | 0.087332814 | 0.199881733 |
| pcaac385.smc240                   | 0.03564092   | 0.02766937  | 0.199882447 |
| kynurenine.pcaec380               | -0.049159042 | 0.038167485 | 0.199923395 |
| methioninesulfoxide.c162          | 0.07645856   | 0.059363093 | 0.199923671 |
| lysopcac204.pcaac404              | -0.007697906 | 0.005978014 | 0.200020343 |
| pcaec422.c51                      | -0.119841961 | 0.093085708 | 0.200112793 |
| pcaac364.pcaac323                 | -0.107833934 | 0.083781049 | 0.200232506 |
| c18.pcaec362                      | 0.048921082  | 0.038016338 | 0.200318899 |
| pcaac363.lysopcac160              | -0.033144304 | 0.025763534 | 0.200444879 |
| isoleucine.pcaac240               | 0.016816819  | 0.013072539 | 0.200465039 |
| isoleucine.pcaac402               | -0.071822357 | 0.055832684 | 0.200478185 |
| prolinr.c16                       | -0.028300299 | 0.022000232 | 0.200485801 |
| pcaac344.transhydroxyproline      | 0.027987707  | 0.021758668 | 0.20051541  |
| pcaec342.lysopcac204              | -0.029898112 | 0.023246822 | 0.200571927 |
| pcaac383.pcaec424                 | -0.004805171 | 0.003736297 | 0.200585037 |
| glutamicacid.arginine             | -0.115991907 | 0.090208077 | 0.200672812 |
| pcaec424.asparticacid             | 0.033061218  | 0.02572724  | 0.200937323 |
| pcaac405.methionine               | -0.038388933 | 0.029873259 | 0.200939601 |
| glutamicacid.pcaec382             | -0.017364912 | 0.013515486 | 0.20102465  |
| c182.pcaac343                     | 0.023668529  | 0.018422433 | 0.201041817 |
| pcaec365.pcaac421                 | -0.042689284 | 0.033228421 | 0.201057417 |
| lysopcac161.glycine               | -0.037071523 | 0.028859439 | 0.2011158   |
| c2.pcaec341                       | 0.050352076  | 0.039201951 | 0.201159981 |
| pcaec403.pcaec383                 | 0.320259827  | 0.249340517 | 0.201160078 |
| c4.pcaec361                       | -0.011218054 | 0.008734423 | 0.201187195 |
| pcaac404.kynurenine               | -0.018809686 | 0.014647265 | 0.201247328 |
| c14.acetylnithoine                | 0.100586531  | 0.078346812 | 0.201357193 |
| pcaac402.pcaec424                 | -0.022941667 | 0.017872275 | 0.201432873 |
| pcaec403.lysopcac161              | 0.05654535   | 0.044052753 | 0.20145484  |
| leucine.pcaec300                  | -0.015555896 | 0.012119182 | 0.201457034 |
| lysopcac280.spermidine            | -0.066839181 | 0.05207295  | 0.2014599   |
| pcaac281.leucine                  | 0.008889467  | 0.006926226 | 0.201501051 |
| pcaac406.pcaac420                 | -0.052660386 | 0.041042777 | 0.201637017 |
| pcaac343.prolinr                  | 0.025736578  | 0.020059705 | 0.201658704 |
| c5.citruline                      | 0.007031681  | 0.005480959 | 0.201683123 |
| pcaec383.arginine                 | -0.117651424 | 0.091724085 | 0.201774791 |
| acetylnithoine.pcaac386           | 0.05795755   | 0.045186234 | 0.201785043 |
| pcaac405.c162                     | -0.061405114 | 0.047877966 | 0.201821188 |
| smc261.lysopcac203                | -0.013274794 | 0.010350788 | 0.201836116 |
| pcaec425.pcaec422                 | -0.03727964  | 0.029069613 | 0.201858746 |

|                                       |              |             |             |
|---------------------------------------|--------------|-------------|-------------|
| pcaec321.pcaac402                     | -0.06992216  | 0.054533322 | 0.201940908 |
| lysopcac204.leucine                   | -0.032075941 | 0.0250183   | 0.201973187 |
| c141.smc181                           | -0.027950419 | 0.021800548 | 0.201973905 |
| lysopcac140.smc180                    | 0.025535823  | 0.019918956 | 0.202012756 |
| pcaec321.glycine                      | 0.096708031  | 0.075443139 | 0.202054577 |
| pcaac300.histidine                    | 0.061412329  | 0.047911383 | 0.202081351 |
| c4.kynurenine                         | -0.014564957 | 0.011366422 | 0.202217093 |
| pcaec420.pcaac320                     | -0.122488216 | 0.09564773  | 0.202491648 |
| pcaac386.pcaac403                     | -0.022583797 | 0.017638575 | 0.202580695 |
| lysopcac203.asparticacid              | 0.026590604  | 0.020772101 | 0.202669249 |
| pcaac341.smc240                       | 0.030633915  | 0.02393963  | 0.202837431 |
| asparticacid.tyrosine                 | -0.066588985 | 0.052038549 | 0.202845539 |
| citruiline.pcaec443                   | 0.037121855  | 0.029014061 | 0.202903508 |
| asparticacid.c102                     | 0.051201055  | 0.04001873  | 0.202909228 |
| creatinine.transhydroxyproline        | 0.027478426  | 0.021478152 | 0.2029306   |
| asymmetricdimethylarginine.citruiline | 0.009268652  | 0.007245173 | 0.202958608 |
| pcaac420.pcaac406                     | 0.049996631  | 0.039083831 | 0.202983656 |
| pcaec425.pcaac281                     | -0.00693617  | 0.0054228   | 0.203032745 |
| pcaec365.smc181                       | 0.026909931  | 0.021040867 | 0.203081543 |
| asparagine.smc180                     | 0.084558118  | 0.066117214 | 0.203090015 |
| c101.pcaac381                         | -0.033927718 | 0.026529537 | 0.203106323 |
| pcaac320.smc161                       | -0.049883359 | 0.039010228 | 0.203155741 |
| pcaac322.pcaac421                     | 0.019407131  | 0.015178087 | 0.203189771 |
| c16.smc160                            | 0.122875968  | 0.096103035 | 0.203204716 |
| pcaac321.c18                          | 0.053529408  | 0.041877191 | 0.203323623 |
| lysopcac140.smohc221                  | -0.042771391 | 0.033481384 | 0.203597716 |
| pcaec340.pcaac322                     | 0.078312663  | 0.061305359 | 0.203614714 |
| pcaec384.prolinr                      | 0.032326508  | 0.025309488 | 0.203674852 |
| smohc222.pcaac425                     | 0.083498041  | 0.065377729 | 0.203704854 |
| methionine.citruiline                 | 0.005798693  | 0.004542755 | 0.203948836 |
| pcaec362.pcaac344                     | 0.096749798  | 0.075796014 | 0.203956139 |
| smohc221.citruiline                   | 0.007079303  | 0.005546406 | 0.20398187  |
| smohc141.pcaac405                     | -0.060653749 | 0.047531452 | 0.20408778  |
| pcaec403.citruiline                   | -0.006267882 | 0.004912258 | 0.204126055 |
| pcaac320.lysopcac181                  | 0.03770699   | 0.029560423 | 0.204259019 |
| pcaac341.kynurenine                   | -0.018186364 | 0.014257615 | 0.204271665 |
| c51.pcaec340                          | 0.038508945  | 0.030190267 | 0.204276164 |
| kynurenine.smc181                     | -0.013201058 | 0.010350193 | 0.204311767 |
| pcaec341.pcaac404                     | 0.011332309  | 0.008885335 | 0.204328039 |
| pcaac386.lysopcac161                  | -0.077638317 | 0.060883261 | 0.204396802 |
| pcaac363.pcaec424                     | -0.006838584 | 0.005365467 | 0.204624292 |
| smc180.pcaac322                       | 0.083489722  | 0.065506995 | 0.204638092 |
| pcaec322.pcaac240                     | -0.017049825 | 0.013378427 | 0.204669653 |
| lysopcac281.leucine                   | 0.042095538  | 0.033032213 | 0.204686746 |
| pcaac381.pcaec364                     | 0.006338589  | 0.004974736 | 0.204765305 |

|                            |              |             |             |
|----------------------------|--------------|-------------|-------------|
| c10.smohc221               | -0.070367025 | 0.0552468   | 0.204931712 |
| pcaec401.smc241            | 0.049496145  | 0.038864088 | 0.204972318 |
| lysopcac182.pcaec424       | -0.012837981 | 0.010081599 | 0.205029948 |
| pcaec386.pcaac380          | 0.166080198  | 0.130429333 | 0.205055594 |
| c181.lysopcac170           | 0.021600383  | 0.016964384 | 0.205075552 |
| c18.pcaec404               | 0.054064615  | 0.04247361  | 0.205209733 |
| alanine.pcaec420           | -0.039435938 | 0.030986866 | 0.205292096 |
| histidine.citruline        | 0.005112329  | 0.004017977 | 0.205399059 |
| histidine.lysopcac160      | 0.03848999   | 0.030251451 | 0.205409253 |
| smc181.kynurenine          | -0.004195678 | 0.003297645 | 0.205412696 |
| pcaec342.citruline         | 0.009710458  | 0.007632369 | 0.205431271 |
| pcaac322.c0                | -0.0008839   | 0.000694757 | 0.205441643 |
| pcaac363.pcaac406          | -0.039679268 | 0.031189139 | 0.205452132 |
| smohc161.lysopcac160       | -0.028291597 | 0.022238551 | 0.20546176  |
| lysopcac181.c3             | -0.076317758 | 0.059998357 | 0.205528923 |
| pcaec421.pcaac405          | -0.054307089 | 0.042698067 | 0.205568282 |
| arginine.smc160            | -0.093677366 | 0.073653066 | 0.205572921 |
| pcaac405.pcaec446          | -0.046699016 | 0.036719407 | 0.20560588  |
| c51.pcaec322               | 0.052957128  | 0.041645315 | 0.205661719 |
| lysopcac203.c51            | -0.081570328 | 0.064160022 | 0.205755711 |
| glutamicacid.pcaac424      | 0.039004058  | 0.030680899 | 0.205782685 |
| lysine.prolinr             | 0.038554521  | 0.030330553 | 0.205831203 |
| c14.transhydroxyproline    | -0.022241688 | 0.017498462 | 0.205859342 |
| pcaec401.smc260            | -0.034095155 | 0.026833064 | 0.206010344 |
| phenylalanine.pcaec382     | -0.037759591 | 0.029722377 | 0.206092029 |
| c141oh.pcaec380            | -0.028566276 | 0.022488208 | 0.206138719 |
| c182.citruline             | 0.00723823   | 0.005699304 | 0.206230323 |
| pcaac362.citruline         | 0.004575581  | 0.003603003 | 0.206260439 |
| pcaec342.smc161            | -0.075456304 | 0.059440758 | 0.206437416 |
| c3.pcaec364                | -0.018064352 | 0.014237078 | 0.206655257 |
| pcaec425.pcaec444          | 0.098051823  | 0.077286341 | 0.20670576  |
| creatinine.pcaec444        | -0.090644058 | 0.071459015 | 0.206779144 |
| pcaec445.tyrosine          | -0.040753159 | 0.032127856 | 0.206782041 |
| pcaec405.acetylmithoine    | -0.056785673 | 0.044767792 | 0.20678872  |
| pcaec401.pcaac405          | -0.053673064 | 0.042316189 | 0.206812901 |
| c182.leucine               | 0.020250292  | 0.015965499 | 0.206813974 |
| lysopcac280.pcaac420       | 0.094524656  | 0.074532339 | 0.20686433  |
| c18.c16                    | -0.063111876 | 0.04976716  | 0.206897721 |
| smohc222.pcaec404          | -0.017974228 | 0.014177081 | 0.20700668  |
| creatinine.pcaec363        | 0.018600029  | 0.014671713 | 0.207038509 |
| methioninesulfoxide.smc202 | -0.091783055 | 0.072399273 | 0.207043192 |
| pcaec362.histidine         | 0.061808882  | 0.048756441 | 0.207052973 |
| glutamine.pcaac426         | -0.055908404 | 0.044113914 | 0.207175029 |
| pcaac425.pcaac405          | -0.032082182 | 0.025315292 | 0.207196396 |
| pcaac365.arginine          | 0.04918911   | 0.038822623 | 0.207297141 |

|                                   |              |             |             |
|-----------------------------------|--------------|-------------|-------------|
| histidine.pcaac405                | -0.064661849 | 0.051034788 | 0.207299518 |
| c4.lysopcac280                    | -0.013967752 | 0.011025368 | 0.207349835 |
| pcaec343.pcaec422                 | 0.035891067  | 0.028333007 | 0.207391154 |
| c14.leucine                       | 0.00713631   | 0.005633625 | 0.207399403 |
| pcaec343.pcaec341                 | 0.074958504  | 0.059177369 | 0.207420734 |
| c16.pcaec343                      | 0.058437498  | 0.046157644 | 0.207646782 |
| smc180.transhydroxyproline        | -0.024547191 | 0.019389301 | 0.207655456 |
| smc181.pcaac425                   | 0.099547631  | 0.078631377 | 0.207660238 |
| smc161.pcaec385                   | -0.049750135 | 0.039322102 | 0.207949059 |
| smohc161.pcaec341                 | 0.099575457  | 0.078718318 | 0.208033409 |
| pcaec421.citruline                | -0.006470834 | 0.005115579 | 0.208044941 |
| asymmetricdimethylarginine.smohc2 | -0.017143162 | 0.013553756 | 0.208080509 |
| smc240.c162                       | -0.089000361 | 0.070367508 | 0.208092652 |
| c14.prolinr                       | 0.042422422  | 0.03354733  | 0.208178129 |
| pcaec364.citruline                | 0.006648179  | 0.005257779 | 0.208216811 |
| pcaac380.smohc221                 | 0.028213841  | 0.02231779  | 0.208309829 |
| lysopcac140.smc240                | 0.074879963  | 0.059235036 | 0.20833489  |
| smohc221.lysopcac280              | 0.014756791  | 0.011674019 | 0.208350951 |
| serine.c2                         | -0.065167364 | 0.051557871 | 0.208388827 |
| ornithine.lysine                  | 0.104570386  | 0.082736388 | 0.208412807 |
| smc161.smc260                     | -0.032900963 | 0.026032962 | 0.208441057 |
| pcaac360.pcaac381                 | -0.049712185 | 0.039335525 | 0.208448484 |
| phenylalanine.prolinr             | 0.05155158   | 0.04079567  | 0.208500551 |
| pcaec381.citruline                | -0.005965979 | 0.004723124 | 0.208683439 |
| c8.smohc221                       | -0.063060552 | 0.049931475 | 0.208755333 |
| lysopcac204.glycine               | -0.046510328 | 0.036831453 | 0.208810375 |
| c102.lysopcac180                  | 0.072956663  | 0.057776376 | 0.208826931 |
| lysopcac181.pcaac380              | 0.051500211  | 0.040791833 | 0.208909138 |
| pcaec385.c14                      | -0.038767039 | 0.030710502 | 0.208971736 |
| pcaec361.pcaac385                 | -0.040180214 | 0.031831054 | 0.208986847 |
| lysopcac140.pcaec422              | 0.041045309  | 0.032521437 | 0.209057137 |
| lysine.pcaec322                   | -0.100141897 | 0.079347737 | 0.209070194 |
| c10.phenylalanine                 | -0.048471795 | 0.03840801  | 0.209084762 |
| c141.lysopcac204                  | 0.043355763  | 0.034355765 | 0.209105698 |
| pcaac386.pcaec382                 | -0.009973614 | 0.007904418 | 0.209172977 |
| pcaac322.putrescine               | 0.039997403  | 0.031700058 | 0.209184386 |
| pcaac360.pcaac421                 | -0.025744693 | 0.020404927 | 0.209204261 |
| pcaac401.citruline                | -0.006962376 | 0.005518579 | 0.209227726 |
| pcaec341.pcaac365                 | -0.045112068 | 0.0357583   | 0.209242632 |
| pcaec301.glutamicacid             | -0.063312018 | 0.05018805  | 0.209273955 |
| serine.lysopcac161                | 0.060787343  | 0.048195362 | 0.20935521  |
| smc161.citruline                  | 0.00592979   | 0.004702511 | 0.209457828 |
| pcaec340.pcaac281                 | -0.004091784 | 0.003246049 | 0.209616272 |
| smc160.leucine                    | 0.006418985  | 0.00509281  | 0.209667125 |
| c51.lysine                        | 0.098670388  | 0.07830133  | 0.209762247 |

|                                    |              |             |             |
|------------------------------------|--------------|-------------|-------------|
| glutamine.pcaac281                 | 0.001464824  | 0.001162588 | 0.209822592 |
| pcaec404.citruline                 | -0.004940801 | 0.003921844 | 0.20987773  |
| smc241.citruline                   | 0.007827015  | 0.006213856 | 0.209952867 |
| pcaac344.smc241                    | 0.028644341  | 0.022743189 | 0.210002509 |
| c10.pcaec424                       | 0.0140145    | 0.011128177 | 0.210037835 |
| c181.citruline                     | 0.006526283  | 0.005182452 | 0.210061831 |
| smohc221.pcaac403                  | -0.007537993 | 0.005986072 | 0.210079389 |
| alphaaminoadipicacid.acetylnithoir | -0.074594937 | 0.059242792 | 0.210121109 |
| serine.pcaec322                    | -0.041544631 | 0.032994837 | 0.210126242 |
| smc241.lysopcac280                 | 0.010531791  | 0.00836525  | 0.210173857 |
| pcaac360.pcaec343                  | 0.092722637  | 0.073659245 | 0.210241501 |
| pcaec321.alphaaminoadipicacid      | 0.034242541  | 0.027202915 | 0.21024981  |
| serine.pcaac322                    | 0.041816157  | 0.033219631 | 0.210251101 |
| c141oh.pcaac406                    | 0.044089848  | 0.035028362 | 0.210282995 |
| c162.citruline                     | 0.006770236  | 0.005379973 | 0.210382245 |
| c8.pcaec424                        | 0.013256119  | 0.010534362 | 0.210398477 |
| c14.pcaec301                       | -0.051330053 | 0.040792005 | 0.210410495 |
| pcaac380.pcaec343                  | 0.035761161  | 0.028436569 | 0.210684383 |
| glutamine.pcaec340                 | 0.043215178  | 0.034364633 | 0.210694652 |
| pcaec425.smohc221                  | 0.044846572  | 0.035662003 | 0.210695774 |
| pcaac426.histidine                 | 0.073866758  | 0.058741261 | 0.210714314 |
| pcaac384.pcaec445                  | 0.053481182  | 0.04253137  | 0.210729098 |
| pcaac363.citruline                 | 0.006307623  | 0.005018034 | 0.210895768 |
| c51dc.c162                         | -0.095692566 | 0.076130196 | 0.210907094 |
| pcaac384.pcaec361                  | -0.010301661 | 0.008196039 | 0.210925955 |
| pcaac365.pcaec365                  | -0.038334208 | 0.030499356 | 0.210933656 |
| pcaac361.smc260                    | -0.024804162 | 0.019737322 | 0.210995837 |
| c102.lysopcac204                   | 0.034137887  | 0.027167383 | 0.211045477 |
| isoleucine.citruline               | 0.003761821  | 0.002994294 | 0.211134355 |
| pcaac402.c141oh                    | 0.106267075  | 0.084588091 | 0.211149289 |
| methionine.pcaec382                | 0.011538266  | 0.009185032 | 0.211180264 |
| pcaec384.alanine                   | -0.026155412 | 0.020827864 | 0.211329792 |
| smc260.smc240                      | -0.053981443 | 0.043005064 | 0.211530485 |
| smc202.lysopcac160                 | -0.016418869 | 0.01308179  | 0.211581543 |
| pcaec321.histidine                 | 0.054428148  | 0.043366583 | 0.21158961  |
| pcaac422.smc161                    | 0.1475806    | 0.117622906 | 0.211726601 |
| pcaac385.c2                        | 0.05852547   | 0.046646591 | 0.211739546 |
| lysopcac161.arginine               | 0.0543146    | 0.043297959 | 0.211818868 |
| pcaac320.arginine                  | -0.06462462  | 0.051523191 | 0.211875269 |
| pcaec380.pcaac281                  | -0.003591762 | 0.002863997 | 0.21193842  |
| pcaac406.pcaac361                  | -0.073035444 | 0.058240634 | 0.211966995 |
| prolinr.pcaec301                   | 0.067919288  | 0.054180269 | 0.212129825 |
| pcaac404.c16                       | 0.030622896  | 0.024428573 | 0.212133818 |
| pcaec364.smc180                    | -0.014582371 | 0.011633904 | 0.212181416 |
| smohc222.citruline                 | 0.003688279  | 0.00294283  | 0.212227559 |

|                               |              |             |             |
|-------------------------------|--------------|-------------|-------------|
| c181.leucine                  | 0.012672719  | 0.010112207 | 0.212263929 |
| pcaec321.pcaec420             | 0.095545547  | 0.076243005 | 0.212277944 |
| smc181.pcaec445               | 0.041734919  | 0.033306254 | 0.212316318 |
| pcaec385.pcaac365             | 0.034629493  | 0.027636252 | 0.212323432 |
| pcaec403.acetylmethionine     | -0.05348596  | 0.042687585 | 0.212353559 |
| pcaec362.phenylalanine        | -0.040960869 | 0.032691708 | 0.212360521 |
| pcaac321.pcaec341             | -0.111915145 | 0.089325939 | 0.212381755 |
| pcaec301.pcaec361             | 0.020497273  | 0.016360867 | 0.212404272 |
| citruiline.smohc221           | 0.020072635  | 0.01602533  | 0.212500964 |
| pcaec360.arginine             | -0.064548984 | 0.051539368 | 0.21255026  |
| c101.lysopcac160              | 0.015146807  | 0.012094801 | 0.212579553 |
| pcaec383.citruiline           | -0.004784795 | 0.003821039 | 0.212621897 |
| smc241.pcaac322               | 0.050757179  | 0.040544543 | 0.212744259 |
| lysopcac181.lysine            | 0.081715012  | 0.06527519  | 0.212756156 |
| pcaec380.smohc221             | 0.06632985   | 0.052987416 | 0.212774413 |
| c0.pcaec403                   | 0.039718344  | 0.031733114 | 0.212834977 |
| pcaac361.citruiline           | 0.003314168  | 0.00264798  | 0.212854554 |
| spermidine.pcaac320           | 0.120515348  | 0.096295035 | 0.212876857 |
| pcaac344.isoleucine           | -0.041472445 | 0.033139899 | 0.212908282 |
| c4.pcaac405                   | 0.055659776  | 0.044496658 | 0.213111943 |
| c51.citruiline                | 0.001931416  | 0.001544124 | 0.213133192 |
| smc202.citruiline             | 0.006131155  | 0.004901876 | 0.2131477   |
| smc241.c5                     | -0.008128641 | 0.006499347 | 0.213180966 |
| alphaaminoadipicacid.pcaac406 | 0.03800711   | 0.030389078 | 0.213181875 |
| h1.smc202                     | 0.083528188  | 0.066787567 | 0.21319224  |
| pcaec322.c8                   | 0.052538551  | 0.042013364 | 0.213241287 |
| pcaec404.asparticacid         | 0.06179191   | 0.04941394  | 0.213250189 |
| pcaec343.pcaac323             | -0.114727721 | 0.09179134  | 0.213476031 |
| methionine.lysopcac280        | 0.010320663  | 0.00825786  | 0.213503931 |
| pcaac320.lysopcac280          | 0.013868581  | 0.011096986 | 0.213517591 |
| pcaec360.pcaac300             | -0.048951485 | 0.039171448 | 0.213549847 |
| pcaec383.lysopcac181          | 0.061864087  | 0.049505623 | 0.213562595 |
| pcaac424.pcaec380             | 0.085499851  | 0.06843503  | 0.213664488 |
| c181.lysopcac204              | 0.031641007  | 0.025328435 | 0.213711624 |
| c8.lysopcac182                | 0.093729839  | 0.075035543 | 0.213744229 |
| smc161.leucine                | 0.009954324  | 0.007969236 | 0.213760752 |
| pcaac281.pcaac425             | 0.101517106  | 0.08127374  | 0.213767152 |
| smc180.citruiline             | 0.006609387  | 0.005292018 | 0.213818621 |
| pcaec384.pcaac384             | -0.05354768  | 0.042875222 | 0.213824522 |
| pcaac420.pcaac240             | -0.020206404 | 0.016180045 | 0.213850702 |
| smohc221.smc202               | -0.075711466 | 0.060627337 | 0.213867632 |
| serine.smc261                 | 0.032258243  | 0.025832743 | 0.213891736 |
| pcaec360.pcaac425             | -0.098814947 | 0.07913572  | 0.213912814 |
| glycine.citruiline            | -0.01239612  | 0.009927576 | 0.213920695 |
| pcaec425.pcaac381             | 0.023574789  | 0.01888185  | 0.213961904 |

|                               |              |             |             |
|-------------------------------|--------------|-------------|-------------|
| lysopcac181.pcaac426          | -0.071257786 | 0.057094185 | 0.214132714 |
| pcaec443.lysopcac280          | 0.013063639  | 0.010468376 | 0.214191024 |
| pcaec360.pcaec446             | -0.063177972 | 0.050627501 | 0.214196976 |
| pcaec420.pcaac406             | -0.069260829 | 0.055509501 | 0.214258701 |
| lysopcac281.kynurenine        | -0.007741436 | 0.006204523 | 0.214266242 |
| pcaac424.pcaac300             | -0.069545473 | 0.055742723 | 0.214300336 |
| lysopcac204.pcaec405          | -0.037628714 | 0.030162782 | 0.214334648 |
| asparagine.citruline          | 0.004637356  | 0.003717804 | 0.214401829 |
| c2.citruline                  | 0.023100612  | 0.01852436  | 0.214510638 |
| putrescine.pcaac405           | 0.018303892  | 0.014678514 | 0.214530525 |
| pcaac321.arginine             | 0.046127829  | 0.036993861 | 0.214559893 |
| pcaac401.pcaac406             | 0.051126289  | 0.041003121 | 0.214566192 |
| pcaac364.c5                   | -0.006538714 | 0.00524544  | 0.214688903 |
| c14.lysopcac170               | 0.034248802  | 0.027477144 | 0.21472739  |
| c141oh.arginine               | 0.035873688  | 0.028787721 | 0.214837695 |
| pcaec301.smohc221             | -0.028436178 | 0.022822027 | 0.214892    |
| smc240.alanine                | -0.058018071 | 0.046565198 | 0.214907939 |
| asymmetricdimethylarginine.c2 | -0.063215632 | 0.050740357 | 0.214940356 |
| pcaec445.smc161               | -0.056534811 | 0.045385366 | 0.215014773 |
| pcaec342.leucine              | 0.009155258  | 0.00735189  | 0.215149758 |
| pcaac381.citruline            | -0.006706453 | 0.005387661 | 0.215337741 |
| c141oh.prolinr                | 0.032115667  | 0.025802161 | 0.215371111 |
| pcaec300.pcaec343             | 0.071382356  | 0.05736243  | 0.215473585 |
| pcaec383.pcaac344             | 0.089139426  | 0.0716346   | 0.215490764 |
| smc181.pcaec444               | 0.088237242  | 0.070909733 | 0.215491727 |
| c12.leucine                   | 0.008742376  | 0.007026173 | 0.215528953 |
| leucine.citruline             | 0.002425631  | 0.001949784 | 0.215605183 |
| glutamine.pcaec343            | -0.059228104 | 0.047622374 | 0.215732687 |
| pcaec405.pcaec382             | -0.084569722 | 0.068003064 | 0.215764614 |
| smohc141.pcaac404             | 0.005798049  | 0.004663317 | 0.215869227 |
| pcaac343.c51                  | -0.124459799 | 0.10010499  | 0.215883453 |
| pcaac361.c102                 | 0.031279587  | 0.025163781 | 0.215976228 |
| pcaac365.methionine           | -0.034409705 | 0.02768308  | 0.21599577  |
| pcaec382.citruline            | -0.005444566 | 0.004381436 | 0.216121646 |
| smohc221.pcaac421             | -0.032428676 | 0.026099482 | 0.216173688 |
| c10.pcaac406                  | 0.048053222  | 0.038676426 | 0.216195938 |
| citruline.methionine          | -0.028070484 | 0.022593866 | 0.216213631 |
| pcaec445.pcaec360             | 0.008715625  | 0.007015869 | 0.21625812  |
| lysopcac180.pcaec321          | 0.042786078  | 0.034450765 | 0.216377441 |
| smohc241.pcaec444             | -0.101446832 | 0.081694154 | 0.216436456 |
| smc181.asparagine             | 0.018008626  | 0.014502625 | 0.216450705 |
| pcaec425.citruline            | -0.008857516 | 0.007133966 | 0.216506514 |
| pcaac402.pcaec322             | 0.059567373  | 0.047980825 | 0.21654879  |
| pcaec386.pcaec445             | 0.063740955  | 0.051344453 | 0.216565307 |
| pcaec341.citruline            | 0.004339969  | 0.003496061 | 0.216583609 |



|                              |              |             |             |
|------------------------------|--------------|-------------|-------------|
| pcaac341.smc161              | -0.042295146 | 0.034079306 | 0.216697098 |
| smc261.alanine               | -0.015180244 | 0.012232784 | 0.21674588  |
| c3.c2                        | -0.04780384  | 0.038533802 | 0.216885327 |
| pcaec362.pcaec443            | 0.051167582  | 0.041246624 | 0.216900532 |
| lysopcac204.citruline        | -0.034070781 | 0.027466987 | 0.216937803 |
| pcaec405.pcaec383            | 0.143897241  | 0.116027634 | 0.217022058 |
| citruline.pcaac323           | -0.077642862 | 0.062612182 | 0.217072938 |
| c102.c4                      | -0.03682864  | 0.029704217 | 0.217152022 |
| c51dc.isoleucine             | 0.034178796  | 0.027567808 | 0.217165767 |
| smc160.prolinr               | 0.035246178  | 0.028430026 | 0.217186563 |
| c0.c182                      | -0.086453579 | 0.069749308 | 0.217283119 |
| pcaac421.pcaec404            | -0.01289474  | 0.010403425 | 0.21729027  |
| pcaac404.asparagine          | 0.010077318  | 0.00813099  | 0.217326891 |
| pcaec420.pcaac422            | -0.055751612 | 0.045001257 | 0.217504585 |
| glutamicacid.lysopcac182     | -0.059033762 | 0.047651404 | 0.217513028 |
| c101.pcaac386                | 0.016518539  | 0.013334446 | 0.217542634 |
| pcaec322.citruline           | 0.005337261  | 0.00430883  | 0.217582251 |
| lysine.pcaec401              | 0.026671586  | 0.021532749 | 0.217592446 |
| pcaec385.citruline           | 0.003723104  | 0.003007947 | 0.217923711 |
| pcaec401.pcaec405            | -0.066551551 | 0.053774965 | 0.217983673 |
| prolinr.pcaac365             | -0.045806665 | 0.037025313 | 0.218139778 |
| pcaec382.pcaec342            | 0.079506895  | 0.06427309  | 0.218197039 |
| pcaec423.citruline           | -0.007279859 | 0.005885441 | 0.218230387 |
| pcaac341.citruline           | 0.009173462  | 0.007417652 | 0.218311787 |
| smc181.pcaec341              | 0.057718131  | 0.04667743  | 0.218376567 |
| pcaec446.pcaec341            | 0.053151711  | 0.042990741 | 0.218442998 |
| pcaec380.arginine            | -0.062699054 | 0.050715113 | 0.218462743 |
| smc161.glutamine             | -0.023799935 | 0.019253529 | 0.218524084 |
| pcaec422.citruline           | -0.017458885 | 0.014123873 | 0.21852693  |
| smc180.pcaac404              | 0.010783597  | 0.008725174 | 0.218604106 |
| pcaec425.tyrosine            | -0.051421632 | 0.041606969 | 0.218614399 |
| pcaec423.pcaec361            | -0.045467083 | 0.036791226 | 0.218642815 |
| serine.kynurenine            | -0.006278853 | 0.005081417 | 0.218703309 |
| pcaec421.spermidine          | -0.063376814 | 0.051305582 | 0.218840104 |
| methionine.pcaac381          | 0.018884125  | 0.015295395 | 0.219082375 |
| c182.pcaac426                | 0.051622871  | 0.041814898 | 0.219108796 |
| methioninesulfoxide.pcaac365 | 0.082430433  | 0.066776029 | 0.219155356 |
| pcaec381.prolinr             | -0.023359243 | 0.018924617 | 0.21919265  |
| c101.glycine                 | -0.026404353 | 0.021392931 | 0.219220519 |
| pcaec300.leucine             | 0.008097332  | 0.00656175  | 0.219308089 |
| acetylorlithoine.lysopcac280 | -0.010188511 | 0.008257047 | 0.219346405 |
| pcaec321.citruline           | 0.004978778  | 0.004035103 | 0.219365262 |
| creatinine.pcaac281          | -0.003344013 | 0.00271027  | 0.219378655 |
| lysopcac181.c0               | -0.000641517 | 0.000520072 | 0.219495591 |
| asparticacid.c8              | 0.069788037  | 0.056579695 | 0.219521201 |

|                                    |              |             |             |
|------------------------------------|--------------|-------------|-------------|
| smc181.lysopcac160                 | -0.016498125 | 0.013376397 | 0.219547533 |
| glutamine.pcaec445                 | 0.062738723  | 0.050871065 | 0.219579827 |
| isoleucine.lysopcac203             | 0.015269837  | 0.012384154 | 0.219682016 |
| pcaac401.c141oh                    | 0.101449154  | 0.082282877 | 0.219712742 |
| c18.pcaac381                       | -0.010950833 | 0.008881977 | 0.21971427  |
| smc261.arginine                    | -0.032416725 | 0.026294014 | 0.219740942 |
| pcaac364.c141                      | -0.0401725   | 0.032593213 | 0.219857715 |
| c101.c8                            | 0.076063679  | 0.061716061 | 0.219881531 |
| smc241.histidine                   | 0.046878259  | 0.038038065 | 0.219909064 |
| c8.pcaec443                        | 0.057937908  | 0.047015584 | 0.219942946 |
| pcaec402.smohc222                  | 0.008951867  | 0.007266386 | 0.220075875 |
| pcaac363.smc241                    | 0.074521123  | 0.060497744 | 0.220133893 |
| c182.kynurenine                    | -0.015079707 | 0.012242296 | 0.220144673 |
| pcaac402.lysopcac161               | 0.074987917  | 0.060887741 | 0.220217128 |
| phenylalanine.citruline            | 0.002041115  | 0.001657456 | 0.220255088 |
| pcaec406.citruline                 | 0.00471572   | 0.003829836 | 0.220315972 |
| c12.acetylornithoine               | 0.103287116  | 0.083902894 | 0.220420232 |
| smohc141.leucine                   | 0.012002157  | 0.009752628 | 0.220559269 |
| pcaac381.pcaac343                  | 0.012086993  | 0.009822289 | 0.220593184 |
| pcaac383.glycine                   | 0.057655646  | 0.046857829 | 0.220641679 |
| lysopcac160.citruline              | -0.00972432  | 0.007904447 | 0.220717701 |
| pcaac344.prolinr                   | 0.047913862  | 0.038948633 | 0.220737575 |
| leucine.pcaac404                   | -0.017200256 | 0.013981962 | 0.220739847 |
| c162.c182                          | -0.078511838 | 0.063826894 | 0.220777248 |
| pcaec403.c181                      | -0.031946335 | 0.025978349 | 0.220906178 |
| pcaec300.glycine                   | 0.054139425  | 0.044040117 | 0.22105878  |
| pcaac385.pcaac341                  | -0.007298603 | 0.005937204 | 0.221066619 |
| smc181.lysopcac170                 | 0.010820111  | 0.008802338 | 0.221092085 |
| pcaec301.kynurenine                | 0.013891209  | 0.011302516 | 0.221164811 |
| pcaac323.pcaac281                  | 0.001786817  | 0.001453891 | 0.221182537 |
| pcaac322.lysopcac161               | 0.070758394  | 0.057580364 | 0.221229698 |
| pcaac420.spermidine                | 0.064659284  | 0.05264247  | 0.221450712 |
| lysopcac280.pcaec341               | -0.064909203 | 0.052849815 | 0.221484379 |
| pcaac380.citruline                 | 0.003635734  | 0.002960374 | 0.221502662 |
| alanine.citruline                  | 0.004685173  | 0.003814953 | 0.221512318 |
| asymmetricdimethylarginine.pcaac40 | 0.026208813  | 0.021343765 | 0.221575878 |
| pcaac365.pcaac401                  | 0.023613222  | 0.019231795 | 0.221619156 |
| pcaac323.pcaac381                  | 0.031165599  | 0.0253833   | 0.221627668 |
| c141.smohc222                      | 0.005260415  | 0.004284608 | 0.221647291 |
| pcaac404.pcaac344                  | 0.078073595  | 0.063610253 | 0.22178676  |
| kynurenine.pcaac425                | -0.09195659  | 0.074928828 | 0.221832415 |
| lysopcac170.pcaec420               | 0.042525433  | 0.034651705 | 0.221842774 |
| lysopcac161.c8                     | 0.055883076  | 0.04553688  | 0.221850283 |
| alphaaminoadipicacid.citruline     | 0.002443585  | 0.00199125  | 0.221866585 |
| prolinr.smc261                     | 0.030690392  | 0.025016854 | 0.222006205 |

|                               |              |             |             |
|-------------------------------|--------------|-------------|-------------|
| pcaac405.asparagine           | 0.013806087  | 0.011254262 | 0.222023277 |
| pcaec342.glutamine            | -0.01598475  | 0.013031528 | 0.222068914 |
| c12.pcaac406                  | 0.049317581  | 0.040208266 | 0.222094401 |
| pcaac406.citruline            | 0.002563079  | 0.002089863 | 0.222139288 |
| c141oh.leucine                | 0.007497141  | 0.006113942 | 0.222213045 |
| c10.lysopcac160               | 0.018340029  | 0.014957141 | 0.222237312 |
| pcaac385.kynurenine           | -0.006517529 | 0.005317651 | 0.22243668  |
| c12.smohc241                  | 0.091543224  | 0.074692509 | 0.222451536 |
| pcaec301.c4                   | -0.012122299 | 0.00989102  | 0.222457065 |
| pcaac384.leucine              | 0.007642615  | 0.006236776 | 0.222522835 |
| c2.smohc221                   | 0.089386281  | 0.072944584 | 0.222527096 |
| acetylnithoine.smc181         | 0.030646899  | 0.025015391 | 0.222631524 |
| c142.c51dc                    | 0.119894255  | 0.097877336 | 0.22269826  |
| pcaec301.smc240               | 0.02803794   | 0.022891026 | 0.22273575  |
| lysopcac180.lysopcac204       | 0.030530551  | 0.024927242 | 0.222757402 |
| pcaec425.smc202               | -0.061903159 | 0.050543277 | 0.22276905  |
| c51dc.pcaac381                | -0.025479553 | 0.02080545  | 0.222805839 |
| c5.pcaec444                   | -0.113253631 | 0.092481086 | 0.222822239 |
| pcaac384.smc240               | 0.031735904  | 0.025916066 | 0.222840691 |
| pcaec301.c12                  | 0.051117342  | 0.041748692 | 0.222900461 |
| smohc241.pcaac421             | -0.017100996 | 0.013966927 | 0.222905606 |
| smohc222.c141oh               | 0.090560358  | 0.073966142 | 0.222921896 |
| pcaac322.lysopcac170          | -0.011215379 | 0.009160745 | 0.222945219 |
| pcaac425.pcaac422             | -0.056171056 | 0.045887047 | 0.223009515 |
| creatinine.pcaac426           | -0.042294342 | 0.034550998 | 0.223010368 |
| pcaec384.pcaec342             | -0.113207024 | 0.092483648 | 0.223024414 |
| smc240.pcaec322               | -0.06476573  | 0.052915019 | 0.223069046 |
| smohc141.pcaac421             | -0.0263878   | 0.021559736 | 0.223076    |
| putrescine.pcaec321           | -0.04532322  | 0.037030868 | 0.223079052 |
| c141.leucine                  | 0.005327599  | 0.004353115 | 0.223105998 |
| pcaec342.c14                  | -0.028225278 | 0.02306455  | 0.223146501 |
| smohc222.kynurenine           | -0.003935241 | 0.003216263 | 0.223224242 |
| smc181.citruline              | 0.003027049  | 0.002474939 | 0.223399123 |
| c16.lysopcac204               | 0.032445525  | 0.026528734 | 0.223416768 |
| lysopcac182.pcaec423          | -0.040943525 | 0.033477233 | 0.223419524 |
| pcaac320.c141oh               | 0.083405726  | 0.068196572 | 0.223422018 |
| smc261.pcaac300               | 0.070821252  | 0.057909564 | 0.22344324  |
| pcaac383.citruline            | 0.004166231  | 0.003407642 | 0.223574671 |
| pcaec422.pcaec343             | 0.083976546  | 0.068691966 | 0.223614211 |
| pcaec384.pcaac365             | 0.033852739  | 0.027691973 | 0.223627086 |
| c142.pcaec383                 | 0.060499542  | 0.049499869 | 0.223724525 |
| alphaaminoadipicacid.pcaec342 | -0.062972605 | 0.051528599 | 0.223771948 |
| pcaac341.pcaec446             | -0.040430497 | 0.033094617 | 0.223932761 |
| pcaac425.lysopcac160          | -0.021024393 | 0.017216552 | 0.224117823 |
| pcaec402.pcaac421             | -0.046895775 | 0.038403315 | 0.224130844 |

|                                    |              |             |             |
|------------------------------------|--------------|-------------|-------------|
| pcaec446.pcaac321                  | -0.031571945 | 0.025857487 | 0.224183892 |
| lysopcac161.pcaec360               | 0.003640922  | 0.002982667 | 0.224298869 |
| c5.pcaac344                        | 0.092616407  | 0.075875358 | 0.224319547 |
| pcaec365.citruline                 | 0.004148546  | 0.003399495 | 0.224431599 |
| pcaac240.c141oh                    | 0.11835304   | 0.096996349 | 0.224492696 |
| pcaac322.phenylalanine             | -0.04528162  | 0.037119251 | 0.224600192 |
| lysopcac161.pcaec422               | -0.065582148 | 0.053761152 | 0.224606232 |
| pcaac421.citruline                 | -0.007004744 | 0.00574262  | 0.224643216 |
| lysopcac180.alanine                | 0.050048297  | 0.041031373 | 0.224652746 |
| pcaac425.smohc221                  | -0.051773072 | 0.042460039 | 0.224811681 |
| c181.lysopcac160                   | 0.012834189  | 0.010525928 | 0.22482815  |
| pcaac300.pcaac421                  | 0.018319814  | 0.015028295 | 0.224930829 |
| c10.pcaec362                       | 0.021095221  | 0.017306878 | 0.224979663 |
| c141.pcaac381                      | -0.011039515 | 0.009057025 | 0.22498064  |
| c181.phenylalanine                 | -0.047492708 | 0.03896478  | 0.224990976 |
| pcaec403.pcaac381                  | 0.033628565  | 0.027591214 | 0.225009226 |
| smc181.pcaec360                    | -0.008906085 | 0.007307876 | 0.22505366  |
| creatinine.lysopcac181             | 0.038079801  | 0.031248515 | 0.22508594  |
| pcaec446.alanine                   | -0.010860539 | 0.008912597 | 0.225105257 |
| kynurenine.pcaac405                | 0.036077965  | 0.029612749 | 0.225194259 |
| lysopcac203.pcaec361               | 0.005547039  | 0.004553159 | 0.225210163 |
| serine.pcaac404                    | 0.005552626  | 0.004558028 | 0.225238727 |
| c4.leucine                         | 0.007488605  | 0.006147796 | 0.225281143 |
| pcaac380.pcaec445                  | 0.05518338   | 0.045323926 | 0.225494405 |
| pcaac424.pcaec301                  | 0.08822399   | 0.072467833 | 0.225536224 |
| pcaac405.citruline                 | 0.003400567  | 0.002793454 | 0.22556973  |
| lysine.pcaec445                    | 0.045679993  | 0.037529099 | 0.225624979 |
| smc241.pcaac384                    | -0.075967301 | 0.062417305 | 0.225663458 |
| putrescine.c141oh                  | 0.111653218  | 0.091766451 | 0.225806272 |
| pcaec385.glycine                   | -0.05000981  | 0.041108427 | 0.225873199 |
| pcaec386.citruline                 | 0.003092464  | 0.002542045 | 0.225876341 |
| glutamicacid.kynurenine            | -0.016976478 | 0.01395825  | 0.225987711 |
| lysopcac182.c3                     | -0.072684141 | 0.059762841 | 0.225996419 |
| pcaec405.pcaec363                  | 0.034272993  | 0.028186563 | 0.226101157 |
| c4.spermidine                      | 0.066112636  | 0.054376399 | 0.226139298 |
| pcaac381.pcaec343                  | 0.077310566  | 0.063588091 | 0.226150961 |
| smc240.pcaec404                    | 0.016028241  | 0.013184751 | 0.226203191 |
| pcaac403.pcaec424                  | -0.011769945 | 0.00968201  | 0.226208544 |
| pcaec424.citruline                 | -0.00245986  | 0.002023655 | 0.226245869 |
| asymmetricdimethylarginine.pcaac38 | 0.026508553  | 0.021812098 | 0.226336501 |
| pcaac360.pcaec340                  | -0.074728943 | 0.061500496 | 0.226419831 |
| alphaaminoadipicacid.lysopcac161   | -0.076499064 | 0.062961144 | 0.226448242 |
| lysopcac140.smohc161               | 0.01472355   | 0.012119321 | 0.22650063  |
| pcaec423.pcaac365                  | 0.069478038  | 0.05719653  | 0.226560612 |
| putrescine.pcaec382                | 0.018372624  | 0.015124966 | 0.226561769 |

|                                  |              |             |             |
|----------------------------------|--------------|-------------|-------------|
| lysopcac140.c101                 | -0.011284607 | 0.009291703 | 0.226652884 |
| pcaac300.c3                      | 0.072913647  | 0.060038097 | 0.226662684 |
| pcaac422.pcaac300                | -0.074114946 | 0.061031997 | 0.226698525 |
| pcaec425.pcaec402                | -0.048781291 | 0.040170833 | 0.226704657 |
| smc261.leucine                   | 0.00666352   | 0.005488329 | 0.226788561 |
| smc261.lysopcac161               | -0.05116679  | 0.042149269 | 0.226858208 |
| pcaec443.smohc221                | -0.080938317 | 0.066682232 | 0.226915759 |
| pcaec420.c0                      | -0.000685521 | 0.000564872 | 0.226994324 |
| lysopcac140.kynurenine           | -0.013154354 | 0.010839689 | 0.227012947 |
| pcaac344.pcaec364                | -0.011314138 | 0.009325093 | 0.227102806 |
| pcaac386.pcaac380                | -0.069311734 | 0.057127254 | 0.227107971 |
| lysine.citruline                 | 0.002345231  | 0.001933158 | 0.227155855 |
| pcaac322.pcaac425                | -0.105205796 | 0.086728957 | 0.227201502 |
| pcaac365.pcaec342                | -0.124348334 | 0.102516602 | 0.22723319  |
| c101.smohc161                    | 0.00703471   | 0.005799757 | 0.227243155 |
| ornithine.citruline              | 0.002714043  | 0.002238217 | 0.227372842 |
| pcaac362.pcaec300                | 0.005623601  | 0.004637717 | 0.227377464 |
| pcaac300.pcaac343                | -0.042622545 | 0.03515287  | 0.227411154 |
| pcaec384.pcaac385                | -0.029701461 | 0.024502685 | 0.22753301  |
| pcaec385.pcaec364                | -0.031447169 | 0.025943807 | 0.227550359 |
| pcaec422.isoleucine              | -0.021594986 | 0.017817428 | 0.227592874 |
| smc240.glutamine                 | -0.029520071 | 0.024363983 | 0.227740675 |
| serotonin.pcaec380               | 0.061155591  | 0.050475713 | 0.227757093 |
| phenylalanine.glycine            | -0.024620227 | 0.020322654 | 0.227801902 |
| alphaaminoadipicacid.lysopcac203 | 0.019832313  | 0.016372142 | 0.227848496 |
| pcaac385.lysopcac160             | 0.02459982   | 0.020308395 | 0.227860799 |
| pcaac380.pcaec342                | -0.138848385 | 0.114635772 | 0.227898781 |
| glycine.pcaac402                 | 0.077875785  | 0.064296141 | 0.227902122 |
| pcaec446.tyrosine                | -0.041019575 | 0.033868756 | 0.227929411 |
| pcaac365.pcaec424                | -0.004853585 | 0.00400807  | 0.22799816  |
| pcaec365.pcaec406                | 0.062566912  | 0.051677684 | 0.228089447 |
| h1.spermidine                    | 0.061567854  | 0.050852744 | 0.228091631 |
| c4.prolinr                       | 0.022356995  | 0.018466806 | 0.228110797 |
| pcaac363.pcaac420                | 0.065417708  | 0.054037022 | 0.228129677 |
| asparagine.smohc222              | 0.006406719  | 0.005292224 | 0.228136541 |
| pcaac384.pcaec405                | -0.063530749 | 0.052483516 | 0.228175348 |
| c182.pcaec322                    | 0.06019957   | 0.049734309 | 0.228200647 |
| pcaac362.pcaec445                | 0.088372621  | 0.07301458  | 0.228231713 |
| smohc141.pcaec445                | 0.028204819  | 0.023305052 | 0.228268905 |
| lysopcac181.smc181               | -0.017109916 | 0.014140041 | 0.228349934 |
| pcaec340.leucine                 | 0.008889397  | 0.007347366 | 0.228410241 |
| c102.pcaec405                    | -0.075599829 | 0.062492343 | 0.228459906 |
| pcaec421.smohc222                | 0.016076741  | 0.013292423 | 0.228566638 |
| lysopcac182.pcaac425             | -0.069702798 | 0.057638521 | 0.228626831 |
| c162.c5                          | -0.006176602 | 0.005108737 | 0.228734797 |

|                              |              |             |             |
|------------------------------|--------------|-------------|-------------|
| pcaac404.smohc222            | -0.005533088 | 0.004577284 | 0.22881621  |
| pcaec321.c8                  | 0.04421376   | 0.036576167 | 0.228816713 |
| citruLine.pcaec342           | 0.064724344  | 0.053555848 | 0.228921724 |
| pcaac363.arginine            | 0.066752253  | 0.055252485 | 0.229078094 |
| pcaec342.kynurenine          | -0.007383866 | 0.006111922 | 0.229086716 |
| pcaec445.lysopcac203         | -0.011723599 | 0.009706752 | 0.229213643 |
| c14.smc202                   | -0.030390223 | 0.025165986 | 0.22928518  |
| phenylalanine.c102           | 0.025241112  | 0.020903748 | 0.229323169 |
| c141.smohc161                | 0.010097638  | 0.00836279  | 0.229339892 |
| pcaac281.glutamine           | -0.015443914 | 0.012794126 | 0.229469907 |
| c102.tyrosine                | 0.066678779  | 0.055238495 | 0.229470925 |
| pcaac406.pcaac385            | -0.032208272 | 0.026683105 | 0.229486658 |
| methioninesulfoxide.pcaec403 | 0.085520833  | 0.070851146 | 0.229493073 |
| methioninesulfoxide.leucine  | -0.031182846 | 0.025834429 | 0.22950177  |
| pcaac300.pcaac344            | -0.101459736 | 0.084066094 | 0.229548745 |
| lysopcac203.citruLine        | -0.00430216  | 0.00356485  | 0.229578185 |
| serine.asparticacid          | 0.030244725  | 0.025064425 | 0.22963512  |
| pcaec445.c18                 | -0.025966392 | 0.021522821 | 0.229719939 |
| pcaac386.citruLine           | 0.003683657  | 0.003053855 | 0.22980695  |
| c4.pcaec422                  | -0.036167184 | 0.029995515 | 0.22999103  |
| pcaec401.pcaec445            | 0.039983958  | 0.033167134 | 0.230077001 |
| pcaec422.smohc221            | -0.099495712 | 0.082534696 | 0.230087701 |
| smc261.spermidine            | 0.062915727  | 0.052193342 | 0.230112994 |
| smc180.leucine               | 0.007349399  | 0.006097373 | 0.230150422 |
| ornithine.pcaac384           | -0.056076868 | 0.046530431 | 0.230217015 |
| pcaec383.pcaec342            | 0.088009925  | 0.073032606 | 0.230250984 |
| c10.h1                       | 0.006605041  | 0.005481394 | 0.23028345  |
| lysopcac161.lysopcac181      | 0.110800614  | 0.091955965 | 0.230307135 |
| c5.leucine                   | 0.016782737  | 0.013928911 | 0.230324891 |
| pcaec360.glycine             | 0.040232308  | 0.033392952 | 0.230352106 |
| pcaec321.leucine             | 0.005423833  | 0.004501822 | 0.230354378 |
| citruLine.pcaec322           | -0.054966052 | 0.045623618 | 0.230368456 |
| c141.pcaec424                | 0.01217759   | 0.010107822 | 0.230369572 |
| serine.pcaec361              | 0.006102796  | 0.005065561 | 0.230372252 |
| c10.serotonin                | 0.085318078  | 0.070818547 | 0.230379961 |
| c141oh.pcaac404              | 0.003021711  | 0.002508594 | 0.230456187 |
| pcaac405.pcaec424            | -0.004326846 | 0.003592813 | 0.230547867 |
| lysopcac181.pcaec341         | 0.0436551    | 0.036252828 | 0.230594547 |
| lysopcac161.smc180           | 0.017004982  | 0.014124921 | 0.230704492 |
| pcaac384.asparticacid        | 0.02742558   | 0.022781764 | 0.230727651 |
| pcaec343.pcaac240            | -0.013052175 | 0.010842212 | 0.230731336 |
| smohc141.smohc221            | 0.035925641  | 0.029845598 | 0.230774886 |
| h1.leucine                   | 0.008882109  | 0.007379582 | 0.230817549 |
| pcaac361.pcaec361            | -0.012650786 | 0.010511814 | 0.230865041 |
| pcaec382.pcaec361            | 0.016863112  | 0.01401214  | 0.230872096 |

|                                   |              |             |             |
|-----------------------------------|--------------|-------------|-------------|
| pcaac344.smohc222                 | 0.006122545  | 0.005087718 | 0.230898072 |
| asymmetricdimethylarginine.c141oh | 0.096026499  | 0.079801343 | 0.230928011 |
| c101.lysopcac204                  | 0.017431023  | 0.014486207 | 0.230941574 |
| pcaec405.pcaec443                 | 0.153119174  | 0.127252854 | 0.23094815  |
| pcaac384.citruline                | 0.002441711  | 0.002029306 | 0.230964531 |
| citruline.phenylalanine           | 0.03808629   | 0.03165435  | 0.230976758 |
| pcaec384.citruline                | 0.009490447  | 0.007887962 | 0.230991098 |
| c2.pcaac381                       | -0.005598856 | 0.004654058 | 0.231049168 |
| pcaec404.pcaac381                 | 0.0366611    | 0.030478317 | 0.23110577  |
| glutamicacid.c102                 | 0.048256086  | 0.040118065 | 0.23110833  |
| smohc222.pcaec445                 | 0.026391072  | 0.021941123 | 0.231123213 |
| pcaac342.pcaac300                 | -0.069604901 | 0.057871597 | 0.231148686 |
| pcaac300.lysopcac280              | 0.008448473  | 0.007024342 | 0.231150565 |
| pcaac385.citruline                | 0.00252703   | 0.002101317 | 0.231208015 |
| lysopcac182.pcaac426              | -0.062931816 | 0.052340732 | 0.231302428 |
| citruline.serotonin               | 0.046018441  | 0.038276747 | 0.231338331 |
| smc161.arginine                   | -0.05702635  | 0.047433396 | 0.231344231 |
| lysopcac140.putrescine            | 0.035320771  | 0.029380308 | 0.231362972 |
| ornithine.pcaec380                | -0.040057609 | 0.033321193 | 0.231372958 |
| pcaac321.pcaec446                 | -0.036157013 | 0.030083761 | 0.231484171 |
| c141.c4                           | -0.036181646 | 0.030105627 | 0.231505317 |
| smohc221.leucine                  | 0.007762529  | 0.006458981 | 0.231506811 |
| c51.c102                          | 0.026658263  | 0.022181666 | 0.231508472 |
| pcaac420.pcaec404                 | -0.011674145 | 0.009714155 | 0.231527331 |
| c162.pcaac362                     | 0.03113332   | 0.025909683 | 0.231587944 |
| pcaac343.serotonin                | 0.121461727  | 0.101093368 | 0.231637711 |
| isoleucine.pcaac405               | 0.054973337  | 0.045766606 | 0.231758934 |
| pcaec405.c14                      | -0.05697928  | 0.047439959 | 0.231791799 |
| pcaac404.citruline                | 0.007299326  | 0.006077365 | 0.231797397 |
| lysopcac170.pcaac384              | -0.040983399 | 0.034127149 | 0.231860964 |
| smc261.tyrosine                   | -0.06091985  | 0.050734531 | 0.23191741  |
| pcaec425.lysopcac180              | 0.038515993  | 0.032077106 | 0.23192731  |
| pcaec322.pcaac402                 | -0.070073642 | 0.058371792 | 0.232028097 |
| smc161.pcaac402                   | -0.035792915 | 0.02981851  | 0.232071441 |
| pcaac323.citruline                | 0.002293829  | 0.001911146 | 0.232118605 |
| c142.pcaec380                     | -0.054947763 | 0.045789807 | 0.232210405 |
| pcaec401.pcaec322                 | -0.084007892 | 0.070008805 | 0.232225149 |
| h1.lysopcac182                    | -0.035703152 | 0.029754914 | 0.232246075 |
| pcaac405.lysine                   | -0.08390423  | 0.06994008  | 0.232342476 |
| lysopcac181.asparticacid          | 0.01901304   | 0.015849393 | 0.232362591 |
| pcaac405.histidine                | 0.050452221  | 0.04206069  | 0.232400063 |
| pcaec380.pcaac362                 | -0.044589505 | 0.037174694 | 0.232420017 |
| pcaec444.pcaac300                 | -0.057426    | 0.047876841 | 0.232422335 |
| c12.lysopcac181                   | 0.080316442  | 0.066961051 | 0.232423277 |
| pcaec363.lysopcac204              | -0.020830608 | 0.017367031 | 0.232429524 |

|                        |              |             |             |
|------------------------|--------------|-------------|-------------|
| lysopcac281.c8         | 0.052365642  | 0.043666228 | 0.232510417 |
| kynurenine.pcaec343    | 0.04254913   | 0.03548702  | 0.23259558  |
| lysopcac203.c101       | -0.036148438 | 0.030151483 | 0.232638702 |
| pcaac366.smohc222      | 0.011410705  | 0.009520402 | 0.232771028 |
| pcaec384.pcaec361      | -0.014008242 | 0.011688104 | 0.232789899 |
| pcaec444.spermidine    | 0.061485741  | 0.05130255  | 0.23279428  |
| pcaec300.pcaac381      | -0.027594308 | 0.023027079 | 0.232852917 |
| pcaec384.pcaec402      | -0.053944408 | 0.045016032 | 0.232854463 |
| creatinine.pcaac421    | 0.009492933  | 0.007921763 | 0.232855159 |
| c18.pcaec361           | -0.015848124 | 0.01322891  | 0.232988707 |
| c182.pcaec423          | -0.024653775 | 0.020579831 | 0.233001749 |
| pcaac320.lysopcac170   | 0.012994605  | 0.010847379 | 0.23300533  |
| smc160.pcaac384        | -0.05259881  | 0.043910627 | 0.233039568 |
| kynurenine.serotonin   | 0.076894137  | 0.064200927 | 0.233097752 |
| pcaec443.pcaac381      | 0.02518389   | 0.021038015 | 0.233348141 |
| pcaec300.c162          | -0.076266971 | 0.063719287 | 0.233404305 |
| pcaec404.pcaac300      | -0.063757204 | 0.053269461 | 0.23341997  |
| c18.leucine            | 0.006980617  | 0.005833029 | 0.233474894 |
| pcaac363.leucine       | 0.008439794  | 0.007053238 | 0.233535226 |
| alanine.pcaac380       | -0.040749741 | 0.034058361 | 0.233580449 |
| c12.pcaec424           | 0.007573847  | 0.006330528 | 0.233606744 |
| glycine.c2             | 0.064634765  | 0.054025284 | 0.233614709 |
| putrescine.c8          | -0.036879765 | 0.030827421 | 0.233634165 |
| c4.pcaec360            | 0.002718775  | 0.002273882 | 0.233897215 |
| pcaec445.c16           | -0.050844489 | 0.042531148 | 0.233970686 |
| lysopcac161.citruline  | 0.008077441  | 0.006757043 | 0.233991757 |
| lysopcac161.kynurenine | -0.008535665 | 0.007140894 | 0.234026395 |
| pcaac426.c51dc         | -0.127357966 | 0.106567763 | 0.234116952 |
| lysine.pcaec405        | 0.049698751  | 0.041589984 | 0.2341636   |
| pcaac365.pcaec444      | 0.115912311  | 0.097001413 | 0.234169198 |
| pcaac424.pcaec343      | 0.066111973  | 0.055329292 | 0.234197591 |
| pcaec424.pcaec402      | -0.050560391 | 0.04231562  | 0.234213976 |
| smc261.smc260          | -0.046648765 | 0.039043351 | 0.234231813 |
| smc202.pcaec361        | -0.006975924 | 0.005838689 | 0.234238905 |
| pcaec423.pcaac323      | -0.071674812 | 0.059997482 | 0.234295604 |
| pcaec361.pcaac405      | -0.03835131  | 0.032105187 | 0.234326189 |
| lysopcac140.pcaec404   | 0.02128242   | 0.017816792 | 0.234340672 |
| pcaec421.pcaac406      | 0.047183013  | 0.039514826 | 0.234518463 |
| pcaac362.c162          | -0.06602762  | 0.055301302 | 0.234556318 |
| lysopcac204.c51        | -0.063073883 | 0.052835015 | 0.23462337  |
| putrescine.citruline   | -0.003848146 | 0.003224441 | 0.234763421 |
| pcaec362.pcaec363      | 0.030352091  | 0.025435754 | 0.234820341 |
| pcaac342.pcaac406      | -0.045679152 | 0.038282734 | 0.234851344 |
| pcaac361.lysopcac160   | -0.033543926 | 0.028117874 | 0.234941069 |
| smc241.leucine         | 0.005850388  | 0.00490405  | 0.234942765 |



|                                     |              |             |             |
|-------------------------------------|--------------|-------------|-------------|
| c14.c162                            | -0.091676824 | 0.076847607 | 0.234943421 |
| pcaec446.pcaec385                   | -0.084564713 | 0.070926617 | 0.235210747 |
| lysopcac170.pcaec422                | -0.028894997 | 0.02423543  | 0.235219347 |
| pcaec443.pcaac343                   | 0.012413902  | 0.010412361 | 0.235233066 |
| c162.smc180                         | -0.010147499 | 0.008511476 | 0.235238393 |
| histidine.pcaac426                  | -0.023506872 | 0.019717854 | 0.235258734 |
| pcaac344.pcaac281                   | -0.003420439 | 0.002869637 | 0.235344806 |
| pcaec364.pcaac424                   | -0.032483405 | 0.027256496 | 0.235412824 |
| pcaac402.pcaec380                   | 0.15660935   | 0.131437674 | 0.235513358 |
| c102.lysopcac160                    | 0.01641996   | 0.013781905 | 0.235550876 |
| pcaac403.pcaec380                   | 0.135644541  | 0.113880783 | 0.23566994  |
| putrescine.pcaac381                 | -0.03880031  | 0.032576153 | 0.235687624 |
| alanine.pcaac281                    | 0.002534174  | 0.002127815 | 0.23572297  |
| pcaac401.pcaec343                   | 0.087996875  | 0.073913751 | 0.23589515  |
| serotonin.prolinr                   | -0.025179347 | 0.021150323 | 0.235910747 |
| pcaec424.pcaac300                   | -0.052510709 | 0.04410834  | 0.23591107  |
| pcaec301.asparagine                 | 0.014226856  | 0.011950796 | 0.235927248 |
| c141.pcaec405                       | -0.030722931 | 0.025808196 | 0.235934875 |
| c51.kynurenine                      | -0.00452152  | 0.003798732 | 0.235998483 |
| c3.pcaec342                         | -0.067960069 | 0.057110098 | 0.236110988 |
| asymmetricdimethylarginine.acetylor | 0.037596323  | 0.031595296 | 0.236130276 |
| serine.citruline                    | 0.005459543  | 0.00458881  | 0.236201881 |
| pcaac425.pcaac323                   | -0.053491991 | 0.044962068 | 0.236216631 |
| pcaec386.pcaec443                   | 0.054139506  | 0.045512419 | 0.23627902  |
| pcaec386.pcaac421                   | -0.031862727 | 0.026785605 | 0.236282127 |
| c142.pcaac281                       | 0.001402762  | 0.001179274 | 0.236295278 |
| asymmetricdimethylarginine.methior  | 0.017644318  | 0.014834145 | 0.236324127 |
| serotonin.citruline                 | 0.005793492  | 0.004871065 | 0.236351929 |
| serine.c141                         | -0.03117607  | 0.026224638 | 0.236571607 |
| pcaec420.c2                         | 0.043752432  | 0.036806402 | 0.236607082 |
| lysopcac160.leucine                 | -0.009878551 | 0.008310326 | 0.236610984 |
| pcaec300.transhydroxyproline        | -0.031051514 | 0.026122855 | 0.236624992 |
| phenylalanine.pcaac321              | 0.024449706  | 0.02056932  | 0.236634066 |
| pcaac422.glycine                    | -0.019756999 | 0.016623102 | 0.236682167 |
| pcaac341.lysopcac160                | -0.020811395 | 0.017510549 | 0.236690204 |
| pcaec424.pcaec444                   | 0.162585407  | 0.136817785 | 0.236757237 |
| c8.pcaac240                         | -0.016254222 | 0.013679007 | 0.236786631 |
| pcaec363.smc161                     | -0.056463541 | 0.047522384 | 0.236831469 |
| pcaec340.citruline                  | 0.00515456   | 0.004339544 | 0.236962893 |
| c102.pcaac281                       | 0.002201457  | 0.001853504 | 0.236996024 |
| pcaac383.pcaac281                   | 0.00378164   | 0.003184257 | 0.237044014 |
| histidine.smc240                    | 0.06723738   | 0.056633895 | 0.237191918 |
| pcaac360.pcaec424                   | -0.013029184 | 0.010978117 | 0.237347682 |
| pcaec424.c14                        | -0.058640605 | 0.049413118 | 0.237383362 |
| lysopcac281.pcaac420                | 0.108885224  | 0.091753955 | 0.237396285 |

|                                    |              |             |             |
|------------------------------------|--------------|-------------|-------------|
| pcaec322.pcaac426                  | 0.075113774  | 0.063301434 | 0.237437247 |
| c181.pcaac421                      | -0.016197932 | 0.013651535 | 0.237467258 |
| pcaec341.leucine                   | 0.005794591  | 0.004883819 | 0.237483334 |
| smc261.pcaac425                    | -0.090731736 | 0.076477717 | 0.237525082 |
| pcaac364.pcaac380                  | -0.050569286 | 0.042625813 | 0.237536003 |
| pcaac426.methionine                | -0.035909132 | 0.030269501 | 0.23755159  |
| pcaec446.pcaac380                  | -0.084673814 | 0.071378061 | 0.237567993 |
| pcaac341.pcaac385                  | -0.029875895 | 0.025186309 | 0.237598068 |
| lysopcac203.pcaec425               | 0.01745902   | 0.014720035 | 0.237646825 |
| pcaec301.pcaec424                  | -0.007819579 | 0.006594231 | 0.237745559 |
| lysopcac203.pcaac322               | -0.084396981 | 0.071172224 | 0.237748572 |
| pcaac361.smc161                    | -0.048077063 | 0.040555631 | 0.237887895 |
| lysopcac204.lysopcac160            | 0.014759472  | 0.012455001 | 0.238059596 |
| c18.c5                             | -0.014174022 | 0.011961709 | 0.23808883  |
| pcaac322.citruline                 | 0.00540901   | 0.004565259 | 0.238139912 |
| pcaac402.h1                        | 0.005755264  | 0.004857571 | 0.23814662  |
| pcaac240.phenylalanine             | -0.070965469 | 0.059897756 | 0.238156947 |
| lysopcac140.leucine                | -0.010716815 | 0.009046122 | 0.238192684 |
| pcaec340.histidine                 | 0.060168986  | 0.050796959 | 0.238266149 |
| c16.pcaac403                       | -0.00674234  | 0.00569223  | 0.238273426 |
| pcaac421.smohc221                  | 0.043561652  | 0.036778876 | 0.238297427 |
| pcaec364.c141oh                    | 0.113892802  | 0.096162512 | 0.238314    |
| lysopcac170.pcaec342               | -0.082360505 | 0.069546253 | 0.238362628 |
| c18.citruline                      | -0.001946241 | 0.001643466 | 0.238372674 |
| pcaec380.lysopcac181               | 0.055129889  | 0.046557331 | 0.23841234  |
| c5.prolinr                         | 0.033516018  | 0.028306382 | 0.238445674 |
| asparagine.smohc221                | -0.057406643 | 0.048486728 | 0.238476625 |
| acetylnithoine.glutamicacid        | -0.063949579 | 0.054014583 | 0.238490195 |
| pcaac343.asparagine                | 0.015391745  | 0.013001298 | 0.238517631 |
| c101.methioninesulfoxide           | 0.025211793  | 0.021299286 | 0.238584811 |
| c51dc.pcaac421                     | -0.009536376 | 0.008056704 | 0.238598513 |
| putrescine.smc180                  | 0.040346464  | 0.034091784 | 0.238674044 |
| acetylnithoine.pcaac405            | 0.052439357  | 0.044311956 | 0.238694823 |
| pcaac383.histidine                 | 0.049290531  | 0.041654778 | 0.23873544  |
| asymmetricdimethylarginine.glycine | -0.054966716 | 0.046452463 | 0.238743656 |
| c14.pcaac381                       | -0.005851791 | 0.004945641 | 0.238770295 |
| pcaac240.pcaac364                  | 0.065526235  | 0.055379536 | 0.238770694 |
| c10.c8                             | 0.189306482  | 0.159994616 | 0.238776923 |
| pcaac321.pcaec401                  | 0.050118761  | 0.042358752 | 0.238780096 |
| pcaac341.leucine                   | 0.006344687  | 0.005362471 | 0.238792899 |
| pcaec383.pcaec363                  | 0.028414994  | 0.024016526 | 0.238801391 |
| pcaec444.citruline                 | -0.002071136 | 0.001750582 | 0.238813509 |
| pcaac364.pcaac344                  | 0.07344431   | 0.062098437 | 0.238973422 |
| pcaec382.pcaac422                  | -0.168084563 | 0.142132082 | 0.239018379 |
| pcaac361.prolinr                   | 0.054262273  | 0.045885022 | 0.239027706 |

|                          |              |             |             |
|--------------------------|--------------|-------------|-------------|
| smohc241.pcaec364        | -0.024649413 | 0.020844619 | 0.239043234 |
| c51.pcaec443             | 0.043862633  | 0.037094125 | 0.239068029 |
| pcaac240.pcaec424        | -0.005617601 | 0.004750746 | 0.239068588 |
| citruiline.c182          | 0.067828948  | 0.057363857 | 0.239081837 |
| pcaec364.leucine         | 0.006678581  | 0.005649469 | 0.239189607 |
| pcaac321.pcaac322        | 0.098354492  | 0.083199662 | 0.239193875 |
| pcaac342.pcaec300        | 0.006490897  | 0.005491034 | 0.239217632 |
| smc181.leucine           | 0.009744895  | 0.008244151 | 0.239238428 |
| lysopcac170.asparticacid | 0.01801538   | 0.015241501 | 0.239255166 |
| pcaec380.c18             | -0.050192702 | 0.042470633 | 0.239323883 |
| c3.leucine               | 0.014176244  | 0.011995288 | 0.239325295 |
| pcaec383.pcaec361        | 0.013097562  | 0.011082891 | 0.239339422 |
| creatinine.smc161        | -0.076278594 | 0.064561499 | 0.239456029 |
| acetylmithoine.pcaec425  | -0.009222869 | 0.007806936 | 0.239503004 |
| lysopcac204.lysopcac203  | -0.009494377 | 0.008038284 | 0.239591602 |
| asparticacid.citruiline  | 0.006235152  | 0.005279646 | 0.239657099 |
| pcaac366.smohc221        | 0.055524106  | 0.047020876 | 0.239712494 |
| pcaec361.pcaac403        | 0.019816101  | 0.016784315 | 0.239794628 |
| pcaac240.pcaac404        | 0.015680982  | 0.013282167 | 0.239805677 |
| glycine.asparticacid     | 0.031997097  | 0.02710497  | 0.239851614 |
| lysopcac182.pcaec445     | 0.041726854  | 0.035356469 | 0.239975353 |
| lysopcac140.pcaec424     | -0.003919777 | 0.003321657 | 0.240018668 |
| pcaac385.pcaec424        | -0.004562489 | 0.003866951 | 0.240097747 |
| pcaac320.pcaac380        | -0.081579242 | 0.069150921 | 0.240153124 |
| pcaac401.pcaac365        | 0.083764364  | 0.071018084 | 0.240251527 |
| pcaac401.pcaac405        | -0.069568472 | 0.058987558 | 0.240292781 |
| c4.pcaac322              | 0.083984869  | 0.071212222 | 0.240298741 |
| pcaac366.c141            | -0.062485174 | 0.05298536  | 0.240326128 |
| pcaac424.c162            | 0.063432146  | 0.053789094 | 0.240332502 |
| c16.leucine              | 0.00877978   | 0.007445215 | 0.240341936 |
| c51.pcaec403             | 0.042788192  | 0.036287658 | 0.240386554 |
| pcaac343.citruiline      | 0.008866061  | 0.007519452 | 0.240408614 |
| glutamine.smc260         | 0.027900165  | 0.023663998 | 0.240436483 |
| pcaac385.lysopcac181     | 0.026260334  | 0.02227573  | 0.240490739 |
| c8.leucine               | 0.00955413   | 0.008105647 | 0.24056058  |
| pcaac342.pcaec424        | -0.005037121 | 0.004273803 | 0.240598969 |
| serine.lysopcac180       | 0.041594016  | 0.035301031 | 0.240732999 |
| pcaec424.acetylmithoine  | -0.087965568 | 0.07466107  | 0.240759898 |
| c101.citruiline          | -0.003109484 | 0.002639264 | 0.240774033 |
| pcaec446.citruiline      | -0.003769806 | 0.003199778 | 0.240780771 |
| pcaac361.pcaac406        | 0.04117398   | 0.034950097 | 0.240807355 |
| c16.c51dc                | 0.067224904  | 0.05706867  | 0.24085265  |
| glutamine.pcaac321       | -0.012839676 | 0.010900727 | 0.240889123 |
| pcaec361.pcaec424        | -0.006904993 | 0.005863968 | 0.241025936 |
| c142.pcaac384            | 0.052774308  | 0.044823201 | 0.241081967 |

|                       |              |             |             |
|-----------------------|--------------|-------------|-------------|
| pcaec404.lysopcac161  | 0.046181088  | 0.039225405 | 0.241106708 |
| pcaac362.pcaac320     | -0.055905991 | 0.047492554 | 0.241175593 |
| smc160.smohc221       | 0.039826174  | 0.033839184 | 0.241266277 |
| asparticacid.pcaac381 | 0.025300396  | 0.021497724 | 0.241281216 |
| pcaac426.pcaec424     | -0.005808883 | 0.004936298 | 0.241332547 |
| c2.pcaac323           | 0.049101161  | 0.041725805 | 0.241332768 |
| pcaac403.pcaec322     | 0.061220253  | 0.052032347 | 0.241403201 |
| lysopcac170.pcaac406  | 0.041306348  | 0.035107674 | 0.241410713 |
| pcaac420.pcaac405     | -0.051595156 | 0.043855778 | 0.241445899 |
| smohc161.leucine      | 0.009173512  | 0.007798726 | 0.241521508 |
| smohc141.pcaac381     | -0.027051053 | 0.022997838 | 0.241537484 |
| pcaec343.smohc161     | -0.008866475 | 0.007538172 | 0.241550626 |
| pcaec361.citruline    | -0.020956194 | 0.017822627 | 0.241706221 |
| leucine.pcaec301      | 0.045873228  | 0.03901514  | 0.241721931 |
| pcaac405.smc161       | -0.04551975  | 0.0387173   | 0.241755724 |
| pcaec361.pcaac322     | 0.058428431  | 0.049709392 | 0.241873318 |
| pcaac341.pcaec401     | 0.064049074  | 0.05449326  | 0.241890265 |
| pcaac321.lysopcac280  | 0.015436199  | 0.013133761 | 0.241910547 |
| pcaec380.c14          | -0.066340282 | 0.05644546  | 0.241913745 |
| lysopcac140.citruline | 0.005149152  | 0.004381878 | 0.24199242  |
| lysopcac182.citruline | -0.003584163 | 0.003050248 | 0.242017013 |
| c142.lysopcac280      | -0.010819308 | 0.009207904 | 0.24203196  |
| pcaec406.smc161       | 0.131509801  | 0.11192716  | 0.242049298 |
| pcaac365.pcaec382     | -0.014476909 | 0.012321445 | 0.242058405 |
| pcaec423.pcaec424     | -0.023201427 | 0.019747496 | 0.242070856 |
| c51dc.serotonin       | 0.08807389   | 0.074962624 | 0.24207113  |
| pcaec360.smc160       | 0.10189711   | 0.086747573 | 0.242176709 |
| pcaac406.smohc221     | 0.029252211  | 0.024906358 | 0.242237193 |
| pcaac362.arginine     | 0.06074353   | 0.05172259  | 0.242268175 |
| c12.pcaac300          | -0.058638551 | 0.049930588 | 0.242271637 |
| methionine.pcaac421   | 0.018711992  | 0.015933396 | 0.242276886 |
| pcaac406.c0           | 0.002458318  | 0.002093688 | 0.242369331 |
| c18.pcaec402          | -0.022571222 | 0.019226433 | 0.242444513 |
| smc202.glutamicacid   | 0.052517903  | 0.044742168 | 0.242515726 |
| c16.smohc161          | 0.032315338  | 0.027531246 | 0.242523842 |
| serine.pcaac365       | -0.043875257 | 0.037388576 | 0.24263401  |
| smc181.pcaec343       | 0.065672859  | 0.055964542 | 0.242642405 |
| histidine.c12         | 0.084204503  | 0.071760403 | 0.242666712 |
| h1.lysopcac181        | 0.102946151  | 0.087739618 | 0.242705649 |
| c162.pcaec300         | -0.027782426 | 0.023678773 | 0.242709312 |
| lysopcac204.c51dc     | -0.116149883 | 0.098999849 | 0.242738167 |
| c18.pcaac365          | 0.038205229  | 0.032568842 | 0.242806989 |
| pcaac383.lysopcac280  | 0.006037327  | 0.005146727 | 0.242814447 |
| serine.glutamicacid   | 0.034876993  | 0.029732647 | 0.242823222 |
| citruline.kynurenine  | -0.037522394 | 0.031994437 | 0.242919708 |

|                              |              |             |             |
|------------------------------|--------------|-------------|-------------|
| c3.pcaec341                  | 0.04382082   | 0.037366091 | 0.24293399  |
| pcaec444.transhydroxyproline | -0.028797677 | 0.024557189 | 0.242959938 |
| pcaec403.smohc221            | -0.068845855 | 0.058717504 | 0.243033986 |
| pcaac281.lysopcac160         | -0.013204709 | 0.011263899 | 0.243109668 |
| c101.pcaac240                | -0.010374829 | 0.008851822 | 0.243208801 |
| smc260.pcaac402              | 0.079655774  | 0.067969361 | 0.243256557 |
| smohc221.arginine            | -0.035413181 | 0.030221539 | 0.243316712 |
| lysopcac281.citruline        | 0.006725901  | 0.005739976 | 0.243325344 |
| smc260.leucine               | 0.005552084  | 0.0047388   | 0.24338228  |
| lysopcac180.serotonin        | -0.078907241 | 0.06735711  | 0.243440854 |
| c8.serotonin                 | 0.095519632  | 0.081538465 | 0.243444416 |
| pcaac343.lysopcac170         | -0.011450348 | 0.009774635 | 0.243457364 |
| lysopcac281.pcaec405         | -0.092172445 | 0.0786857   | 0.243471222 |
| lysopcac180.serine           | -0.047651982 | 0.040689962 | 0.243591767 |
| pcaec402.pcaec385            | -0.062638301 | 0.053492003 | 0.243637746 |
| pcaac364.pcaec424            | -0.00500722  | 0.004276253 | 0.243656979 |
| methionine.pcaac384          | -0.046154233 | 0.039419325 | 0.243690416 |
| pcaac364.citruline           | 0.004118425  | 0.003517499 | 0.243695958 |
| pcaac281.pcaec405            | -0.056887447 | 0.048596059 | 0.243784347 |
| pcaac383.pcaec446            | -0.039983543 | 0.034162039 | 0.243868517 |
| c162.smc160                  | 0.062302935  | 0.053231938 | 0.243869869 |
| smc161.pcaac406              | 0.021465079  | 0.018339908 | 0.243870836 |
| phenylalanine.pcaac403       | 0.009146963  | 0.007815983 | 0.243916272 |
| pcaec421.pcaec423            | 0.157582008  | 0.134652837 | 0.2439186   |
| smc240.h1                    | 0.006100988  | 0.005215083 | 0.244083026 |
| pcaec420.pcaac321            | -0.042371921 | 0.036222093 | 0.244120117 |
| spermidine.c102              | 0.122822996  | 0.105020778 | 0.244228348 |
| pcaac341.pcaac404            | 0.003558329  | 0.003042647 | 0.244239109 |
| c101.c16                     | 0.041980792  | 0.035903738 | 0.244329385 |
| pcaec300.smohc222            | 0.004844484  | 0.004143987 | 0.244417784 |
| isoleucine.leucine           | 0.043360031  | 0.037091392 | 0.244431521 |
| pcaec421.c141oh              | 0.110400573  | 0.09445157  | 0.24449022  |
| citruline.pcaac240           | -0.024336088 | 0.020821527 | 0.244516111 |
| pcaac323.c14                 | -0.015182295 | 0.012990743 | 0.244553688 |
| pcaac360.c141oh              | 0.098161518  | 0.084002933 | 0.244614881 |
| pcaac344.c102                | 0.032714336  | 0.027996365 | 0.244626079 |
| pcaac425.pcaac343            | 0.019209985  | 0.016439643 | 0.244628038 |
| glycine.pcaac322             | 0.054633042  | 0.046756025 | 0.244646248 |
| serine.c14                   | 0.065376342  | 0.05595733  | 0.244704799 |
| smohc141.pcaec443            | 0.070994341  | 0.060770003 | 0.244736323 |
| glutamicacid.citruline       | 0.014550172  | 0.01245533  | 0.244759651 |
| lysopcac140.pcaec443         | 0.073700205  | 0.063090176 | 0.244766075 |
| methionine.lysopcac160       | -0.03771867  | 0.032288901 | 0.244770228 |
| pcaec444.leucine             | 0.005948648  | 0.005092532 | 0.244790344 |
| c162.pcaac381                | -0.006733881 | 0.005765433 | 0.244845475 |

|                               |              |             |             |
|-------------------------------|--------------|-------------|-------------|
| smc181.pcaac341               | -0.00508331  | 0.004352244 | 0.244845687 |
| lysopcac161.pcaac320          | -0.112672399 | 0.096474996 | 0.24487871  |
| pcaac385.pcaec383             | -0.066185185 | 0.056683214 | 0.244982993 |
| pcaac420.pcaec422             | -0.030403542 | 0.026044699 | 0.245092724 |
| pcaac300.pcaac403             | 0.009730251  | 0.008338148 | 0.245255359 |
| smohc222.leucine              | 0.012905609  | 0.011060579 | 0.245313586 |
| lysopcac161.leucine           | -0.018719382 | 0.016043853 | 0.245332821 |
| pcaac421.pcaec405             | -0.081065594 | 0.0694807   | 0.245344118 |
| pcaac385.smc241               | 0.065977188  | 0.056551172 | 0.245365958 |
| pcaec382.pcaac381             | 0.04526354   | 0.038799747 | 0.245401183 |
| pcaac380.leucine              | 0.007135725  | 0.00611805  | 0.245503436 |
| lysopcac204.lysine            | 0.050701616  | 0.043474531 | 0.245544751 |
| c3.pcaac300                   | 0.049162825  | 0.042156231 | 0.245557557 |
| lysopcac140.pcaec341          | 0.061328267  | 0.052589039 | 0.245567937 |
| serotonin.lysopcac161         | -0.072479409 | 0.062155305 | 0.245599331 |
| pcaac343.lysopcac280          | 0.01285031   | 0.011020653 | 0.245631932 |
| c5.pcaac402                   | 0.049679346  | 0.042615217 | 0.24573486  |
| c142.c102                     | 0.054319607  | 0.046599362 | 0.245772199 |
| c16.c162                      | -0.129227962 | 0.110862442 | 0.24577717  |
| pcaec361.pcaec445             | 0.0395078    | 0.033895428 | 0.245809996 |
| pcaec402.smc260               | -0.037725952 | 0.032368376 | 0.245834257 |
| c8.c16                        | 0.049794031  | 0.042727954 | 0.245892797 |
| pcaac406.pcaec301             | 0.06972014   | 0.059834818 | 0.245958703 |
| pcaac426.citruline            | 0.004705319  | 0.004038473 | 0.245993709 |
| c51.pcaac426                  | 0.033327798  | 0.028605206 | 0.246004941 |
| pcaec425.c51dc                | -0.113421543 | 0.097364834 | 0.246078659 |
| asparticacid.pcaac405         | -0.037908168 | 0.032542234 | 0.246087309 |
| c10.leucine                   | 0.0101701    | 0.00873061  | 0.246092521 |
| smohc222.phenylalanine        | -0.042300828 | 0.036322277 | 0.246205945 |
| methioninesulfoxide.pcaec364  | 0.004575194  | 0.003928742 | 0.246227433 |
| creatinine.leucine            | 0.009139016  | 0.007849481 | 0.246332912 |
| lysopcac182.pcaac365          | 0.04036704   | 0.034673501 | 0.246364615 |
| c181.pcaac381                 | -0.008121575 | 0.006977023 | 0.246428573 |
| methioninesulfoxide.histidine | -0.098404885 | 0.084539537 | 0.246442999 |
| pcaac424.pcaec402             | -0.113899837 | 0.097858009 | 0.246475544 |
| lysopcac203.putrescine        | 0.041314225  | 0.035495939 | 0.246481807 |
| c182.pcaac381                 | -0.008645062 | 0.007427899 | 0.246502138 |
| lysopcac204.c142              | 0.032850065  | 0.028225017 | 0.246502273 |
| alanine.c102                  | 0.038664042  | 0.033236385 | 0.246728066 |
| pcaac360.lysopcac180          | 0.076326729  | 0.065642579 | 0.246947276 |
| serotonin.pcaac344            | 0.057760311  | 0.049679424 | 0.24698847  |
| pcaec340.pcaac381             | -0.050040031 | 0.043042017 | 0.247018812 |
| pcaac362.transhydroxyproline  | 0.021713329  | 0.018679104 | 0.247077905 |
| pcaac406.smc261               | 0.04039529   | 0.034750841 | 0.247083293 |
| arginine.pcaec422             | 0.02594983   | 0.022325808 | 0.247124524 |

|                                    |              |             |             |
|------------------------------------|--------------|-------------|-------------|
| pcaac342.transhydroxyproline       | 0.019782762  | 0.017024162 | 0.247239499 |
| pcaac404.leucine                   | 0.017626344  | 0.015168874 | 0.247252793 |
| pcaec402.pcaac323                  | -0.072872758 | 0.062722958 | 0.247328871 |
| acetylmethionine.citruline         | 0.011923169  | 0.010264888 | 0.247438501 |
| c51dc.citruline                    | -0.00324161  | 0.00279081  | 0.247446097 |
| pcaec381.pcaec361                  | 0.011016416  | 0.009486536 | 0.247552074 |
| smc181.pcaac404                    | 0.008375667  | 0.007212648 | 0.247560687 |
| pcaac401.pcaac343                  | 0.013727618  | 0.011822552 | 0.247604798 |
| pcaec322.leucine                   | 0.011038976  | 0.009507164 | 0.247611461 |
| asymmetricdimethylarginine.pcaac38 | -0.081110864 | 0.069857778 | 0.247626138 |
| pcaec425.pcaac402                  | -0.099640855 | 0.085838867 | 0.247746181 |
| pcaec384.leucine                   | 0.006674168  | 0.005750987 | 0.247853112 |
| pcaac402.lysopcac170               | -0.039655247 | 0.034172278 | 0.247883506 |
| c8.pcaec425                        | -0.056986426 | 0.049114617 | 0.247955106 |
| pcaac420.pcaec405                  | -0.056998417 | 0.049134668 | 0.248048181 |
| pcaec382.pcaac300                  | -0.077961038 | 0.06722899  | 0.248214809 |
| pcaac366.tyrosine                  | 0.054118912  | 0.046673543 | 0.248261131 |
| smohc221.lysopcac281               | 0.019921594  | 0.017181387 | 0.248274602 |
| smohc141.c141                      | -0.024579202 | 0.021198799 | 0.248284735 |
| pcaac424.pcaac405                  | -0.041312921 | 0.035633435 | 0.248315408 |
| smohc161.transhydroxyproline       | -0.01770967  | 0.01527624  | 0.248352483 |
| pcaec443.tyrosine                  | -0.053293606 | 0.045978639 | 0.248433804 |
| pcaec322.pcaec444                  | 0.121036154  | 0.104447426 | 0.24854397  |
| ornithine.pcaec300                 | 0.019193993  | 0.01656402  | 0.248563241 |
| methioninesulfoxide.pcaac385       | -0.054798517 | 0.047290201 | 0.248565363 |
| pcaec381.smohc222                  | -0.017265084 | 0.01490221  | 0.2486517   |
| c3.pcaec340                        | 0.026447512  | 0.02282797  | 0.248652223 |
| alanine.tyrosine                   | 0.065479721  | 0.056522437 | 0.248686464 |
| pcaac360.pcaac322                  | 0.064609566  | 0.055775246 | 0.248719661 |
| pcaac344.pcaec445                  | 0.062762151  | 0.054181905 | 0.248732429 |
| pcaec341.pcaec364                  | -0.023478045 | 0.020268702 | 0.248740627 |
| asymmetricdimethylarginine.pcaac40 | 0.068679209  | 0.059294638 | 0.248768961 |
| pcaac363.pcaac421                  | 0.024279081  | 0.020961607 | 0.248771134 |
| pcaec405.c141oh                    | 0.081293172  | 0.070186647 | 0.248780116 |
| citruline.pcaec341                 | -0.03294295  | 0.028446305 | 0.248848366 |
| histidine.spermidine               | -0.065803325 | 0.056821815 | 0.248852588 |
| pcaec321.smc161                    | -0.064115379 | 0.05536526  | 0.248861121 |
| pcaec402.pcaec380                  | 0.083491986  | 0.072100657 | 0.248882044 |
| lysopcac170.serotonin              | -0.10398479  | 0.089798447 | 0.248887009 |
| putrescine.smohc161                | 0.009554354  | 0.008251222 | 0.248906466 |
| pcaec405.pcaac281                  | -0.005157738 | 0.00445504  | 0.248988235 |
| c141oh.pcaac381                    | -0.010191221 | 0.008803047 | 0.249003895 |
| ornithine.isoleucine               | 0.023355476  | 0.020175493 | 0.249034956 |
| pcaec382.lysopcac204               | -0.111410832 | 0.096245173 | 0.249052427 |
| c102.pcaac365                      | 0.023865757  | 0.020618234 | 0.249079224 |

|                                 |              |             |             |
|---------------------------------|--------------|-------------|-------------|
| histidine.lysopcac204           | -0.0141402   | 0.012216181 | 0.249083183 |
| glycine.lysopcac280             | 0.009254672  | 0.007996893 | 0.249170301 |
| pcaac426.kynurenine             | -0.010943135 | 0.009455952 | 0.249173865 |
| pcaec364.alanine                | -0.022226722 | 0.019207784 | 0.249215426 |
| pcaac385.pcaec341               | 0.068189041  | 0.058930429 | 0.249240586 |
| pcaec422.pcaec322               | 0.066141881  | 0.057161446 | 0.249242361 |
| glutamine.prolinr               | 0.027947925  | 0.024154841 | 0.249272681 |
| alphaaminoadipicacid.pcaac383   | -0.011156839 | 0.009643553 | 0.24931747  |
| lysopcac140.histidine           | 0.057289134  | 0.049523583 | 0.249365092 |
| citruline.c142                  | -0.041373697 | 0.035765491 | 0.249365148 |
| pcaac421.pcaac405               | -0.045592741 | 0.039418325 | 0.249433054 |
| pcaec340.pcaac404               | 0.010697365  | 0.009249482 | 0.249474413 |
| pcaac342.pcaac421               | 0.014104106  | 0.012196093 | 0.249511928 |
| pcaac422.pcaec424               | -0.013387421 | 0.011576699 | 0.249525668 |
| prolinr.pcaac421                | 0.012913211  | 0.011167053 | 0.249543586 |
| pcaac300.citruline              | 0.004472776  | 0.003868072 | 0.249557696 |
| pcaac240.pcaec342               | 0.076864774  | 0.066474505 | 0.249568995 |
| citruline.leucine               | 0.007175411  | 0.006207677 | 0.24973673  |
| pcaec341.smc161                 | -0.05128136  | 0.044368742 | 0.249774957 |
| pcaec301.pcaac421               | 0.01156385   | 0.010008124 | 0.249918911 |
| pcaac363.smohc222               | -0.036991604 | 0.032017227 | 0.249951792 |
| pcaac341.smohc222               | 0.006800204  | 0.005885838 | 0.249958115 |
| c8.pcaac406                     | 0.044730076  | 0.038719981 | 0.250011431 |
| pcaec383.pcaac381               | 0.03747038   | 0.032439129 | 0.250060914 |
| smc261.lysine                   | 0.072273005  | 0.062570787 | 0.250076554 |
| smohc241.pcaac344               | -0.060732875 | 0.052585347 | 0.250125823 |
| c142.lysopcac160                | 0.013220611  | 0.011450638 | 0.25027479  |
| methioninesulfoxide.lysopcac181 | 0.079702796  | 0.069043934 | 0.250354927 |
| kynurenine.arginine             | 0.025787707  | 0.022339578 | 0.250366083 |
| pcaec362.glutamine              | -0.014790077 | 0.012812584 | 0.250370488 |
| isoleucine.c3                   | 0.037077138  | 0.032123421 | 0.250423985 |
| serotonin.pcaec404              | 0.018917791  | 0.016390691 | 0.250436208 |
| pcaec423.c18                    | -0.032712756 | 0.028348111 | 0.25052321  |
| citruline.pcaac322              | -0.038975764 | 0.033777886 | 0.250556687 |
| pcaac366.c16                    | 0.024945839  | 0.021619538 | 0.250568052 |
| putrescine.lysopcac204          | -0.022858567 | 0.019817736 | 0.250738223 |
| pcaec446.histidine              | 0.043248823  | 0.037497943 | 0.25076876  |
| pcaec385.leucine                | 0.005425182  | 0.004704167 | 0.250806999 |
| pcaec301.smc202                 | 0.036582493  | 0.03172477  | 0.250868699 |
| pcaec340.c101                   | -0.010576634 | 0.009174795 | 0.251003044 |
| pcaac365.citruline              | 0.004522026  | 0.003923417 | 0.251092741 |
| lysopcac140.c102                | 0.03430227   | 0.029766015 | 0.251164804 |
| pcaac422.pcaac425               | -0.104458463 | 0.09066221  | 0.251256954 |
| alanine.pcaac426                | -0.044499082 | 0.038623274 | 0.251273634 |
| pcaac385.smc261                 | 0.061834181  | 0.053672362 | 0.251299775 |



|                       |              |             |             |
|-----------------------|--------------|-------------|-------------|
| pcaec404.pcaec364     | 0.006094801  | 0.005290368 | 0.251304456 |
| pcaec421.pcaec424     | -0.151662442 | 0.131666993 | 0.251383177 |
| pcaec445.pcaec380     | -0.072839582 | 0.063267576 | 0.251616614 |
| pcaec382.pcaec380     | 0.110807827  | 0.096251171 | 0.251640338 |
| lysopcac182.leucine   | -0.006926604 | 0.006019859 | 0.251890703 |
| pcaec365.pcaec360     | -0.002994449 | 0.00260271  | 0.251937253 |
| pcaec444.arginine     | -0.034289979 | 0.029804686 | 0.251946477 |
| pcaec341.lysopcac160  | -0.024944628 | 0.02168179  | 0.251947325 |
| pcaac402.pcaac343     | 0.013843932  | 0.012034148 | 0.251988396 |
| pcaec385.pcaec341     | 0.060777079  | 0.052833011 | 0.251998881 |
| lysopcac140.pcaec401  | -0.069010872 | 0.059994193 | 0.252027308 |
| leucine.c18           | 0.041921395  | 0.036445627 | 0.25204687  |
| arginine.pcaec444     | 0.095546077  | 0.083067328 | 0.252055218 |
| pcaec386.lysine       | -0.093808385 | 0.081574527 | 0.252159037 |
| smc180.pcaec361       | -0.010591163 | 0.009209957 | 0.252160185 |
| pcaec420.lysopcac203  | -0.00844398  | 0.007343417 | 0.252200439 |
| pcaec386.pcaec360     | -0.004200457 | 0.003653048 | 0.252208897 |
| pcaac365.lysopcac281  | 0.018386646  | 0.015993156 | 0.252288107 |
| pcaac343.smohc222     | 0.009217794  | 0.008019212 | 0.252367523 |
| pcaac321.citruline    | 0.006341288  | 0.005517913 | 0.252468289 |
| lysopcac180.pcaec340  | 0.054723043  | 0.047625109 | 0.25254257  |
| smc161.asparagine     | 0.013824727  | 0.012035061 | 0.252679578 |
| pcaac344.citruline    | 0.003287481  | 0.002862183 | 0.252725743 |
| spermidine.citruline  | 0.021581947  | 0.018790803 | 0.25274803  |
| pcaec360.citruline    | 0.007608731  | 0.006624734 | 0.252749678 |
| pcaac320.pcaec421     | 0.016338633  | 0.014227878 | 0.252823801 |
| pcaec300.lysopcac204  | -0.018154344 | 0.015811734 | 0.252904829 |
| pcaac406.pcaec380     | -0.059217055 | 0.051577703 | 0.252922527 |
| pcaac320.citruline    | 0.005941445  | 0.005176265 | 0.253041339 |
| pcaac240.smc160       | 0.071958526  | 0.062691783 | 0.253045593 |
| pcaec381.c18          | 0.051702943  | 0.04504801  | 0.253080374 |
| pcaac385.pcaec384     | 0.07559809   | 0.065885961 | 0.253212757 |
| pcaec446.c14          | -0.037625644 | 0.032793458 | 0.253235832 |
| c12.lysopcac140       | -0.00332106  | 0.002894963 | 0.253304385 |
| pcaec384.pcaec380     | 0.040784762  | 0.035553841 | 0.25332863  |
| pcaec443.asparticacid | 0.052649464  | 0.045900861 | 0.253370274 |
| c10.glycine           | -0.033222988 | 0.028964511 | 0.253370968 |
| pcaec361.lysopcac204  | -0.041344393 | 0.036045499 | 0.253378481 |
| pcaac385.pcaec342     | -0.102796686 | 0.089626006 | 0.25340079  |
| pcaac420.citruline    | -0.007897662 | 0.006887013 | 0.253484962 |
| pcaac422.arginine     | -0.016308482 | 0.014221909 | 0.253498086 |
| pcaec363.pcaec342     | 0.198604575  | 0.173212673 | 0.253548173 |
| arginine.pcaec322     | -0.058955376 | 0.051424324 | 0.253607747 |
| pcaac424.c141oh       | 0.079641734  | 0.069477706 | 0.253672572 |
| c51.prolinr           | 0.031089732  | 0.027122675 | 0.253684298 |

|                                    |              |             |             |
|------------------------------------|--------------|-------------|-------------|
| c12.phenylalanine                  | -0.032562873 | 0.028412905 | 0.253768482 |
| pcaac343.pcaec300                  | 0.00533998   | 0.004660059 | 0.253832457 |
| leucine.pcaac281                   | -0.002981391 | 0.002602295 | 0.253925951 |
| pcaac240.pcaac421                  | -0.037097605 | 0.032383651 | 0.253971986 |
| pcaec300.pcaec364                  | -0.034197783 | 0.029856233 | 0.254034136 |
| lysopcac281.pcaec424               | -0.011928867 | 0.010414991 | 0.254058784 |
| arginine.pcaac384                  | -0.039702017 | 0.034668282 | 0.254124136 |
| creatinine.smohc221                | 0.050509206  | 0.044109247 | 0.254166959 |
| prolinr.pcaac384                   | -0.051243171 | 0.044752957 | 0.254195948 |
| c12.pcaec383                       | 0.059735729  | 0.052171018 | 0.254206188 |
| lysopcac140.smc161                 | 0.096668932  | 0.084440035 | 0.254278391 |
| pcaac240.tyrosine                  | -0.062097928 | 0.054245643 | 0.254306979 |
| smohc222.pcaac281                  | 0.001888437  | 0.001649691 | 0.25432041  |
| pcaec364.kynurenine                | -0.014361156 | 0.012545644 | 0.254324204 |
| smohc222.pcaac421                  | -0.015755873 | 0.013766779 | 0.25441813  |
| alphaaminoadipicacid.pcaac426      | 0.050237051  | 0.043904619 | 0.254522852 |
| glutamine.pcaec401                 | 0.025349554  | 0.022155131 | 0.254542355 |
| kynurenine.pcaec342                | 0.089604579  | 0.078313556 | 0.254545349 |
| serotonin.serine                   | 0.037045025  | 0.032380132 | 0.254591053 |
| c3.taurine                         | -0.051960829 | 0.045421001 | 0.254625783 |
| pcaac341.serotonin                 | 0.105309763  | 0.092063459 | 0.25466718  |
| pcaac383.putrescine                | 0.022054291  | 0.019280629 | 0.254677459 |
| asparagine.pcaac426                | -0.023611604 | 0.020642764 | 0.254693001 |
| pcaec385.pcaac386                  | 0.02378255   | 0.020796986 | 0.254801454 |
| pcaac422.pcaac240                  | -0.02104954  | 0.018408387 | 0.25483536  |
| asymmetricdimethylarginine.pcaac38 | 0.012085364  | 0.010569471 | 0.254857544 |
| pcaec300.pcaac406                  | -0.033247195 | 0.029091483 | 0.255094206 |
| creatinine.phenylalanine           | 0.039175468  | 0.034280965 | 0.255124709 |
| c12.smohc222                       | -0.005079822 | 0.004445405 | 0.255150802 |
| pcaac300.pcaac321                  | -0.031406232 | 0.027487284 | 0.255208731 |
| prolinr.pcaec322                   | -0.060168394 | 0.052661491 | 0.255218236 |
| c4.pcaec403                        | 0.07999722   | 0.07001758  | 0.255226371 |
| pcaac384.c8                        | -0.042505247 | 0.03721429  | 0.255373385 |
| lysopcac140.c141                   | -0.037812585 | 0.033116138 | 0.255521653 |
| pcaac365.pcaac321                  | -0.039886182 | 0.034935944 | 0.255572529 |
| pcaac365.transhydroxyproline       | 0.033342103  | 0.029214284 | 0.255738378 |
| pcaac361.pcaac404                  | 0.004119581  | 0.003609633 | 0.25574672  |
| lysopcac182.valine                 | -0.082120466 | 0.071960683 | 0.255783711 |
| pcaec381.lysopcac170               | -0.017371726 | 0.015223442 | 0.25581207  |
| smohc141.lysopcac160               | -0.021852991 | 0.019158428 | 0.256007203 |
| pcaec445.pcaac321                  | -0.021506466 | 0.018861804 | 0.256187211 |
| lysopcac280.pcaec405               | 0.088317757  | 0.077457311 | 0.256187423 |
| glycine.smc240                     | 0.040859571  | 0.035835122 | 0.256188177 |
| pcaec424.pcaec385                  | -0.063321389 | 0.055539733 | 0.256229886 |
| c102.lysopcac281                   | 0.012563255  | 0.011019366 | 0.256231061 |

|                                    |              |             |             |
|------------------------------------|--------------|-------------|-------------|
| c10.pcaac281                       | -0.003799328 | 0.003332628 | 0.256258911 |
| pcaec404.leucine                   | -0.007513109 | 0.006591819 | 0.25637398  |
| asymmetricdimethylarginine.pcaec44 | 0.052558575  | 0.046113679 | 0.256374654 |
| c5.lysopcac182                     | 0.084006254  | 0.073707271 | 0.256388305 |
| arginine.pcaac341                  | 0.005515992  | 0.004840078 | 0.256420992 |
| alphaaminoadipicacid.pcaec340      | 0.044605382  | 0.039142829 | 0.25646049  |
| pcaac422.lysopcac203               | -0.022242722 | 0.019523146 | 0.256566131 |
| pcaac405.lysopcac170               | 0.00824025   | 0.007232759 | 0.256568071 |
| pcaac425.citruline                 | 0.006480266  | 0.00568886  | 0.256643056 |
| pcaec424.pcaac381                  | 0.020017336  | 0.017573369 | 0.256660832 |
| pcaec446.smc261                    | 0.039054276  | 0.034291365 | 0.256734345 |
| pcaac386.pcaac405                  | -0.037035497 | 0.032521883 | 0.256779382 |
| pcaec386.pcaec424                  | -0.00935739  | 0.008217126 | 0.256787791 |
| methionine.alanine                 | 0.019881044  | 0.017462119 | 0.256888693 |
| pcaac380.pcaec385                  | -0.060093461 | 0.052784688 | 0.256913737 |
| c8.glycine                         | -0.038946344 | 0.034218171 | 0.257032966 |
| h1.isoleucine                      | 0.025876492  | 0.02274163  | 0.257170441 |
| smc241.pcaac362                    | -0.044155666 | 0.038816708 | 0.257297013 |
| pcaec404.smohc222                  | -0.012322916 | 0.010836922 | 0.257471736 |
| smohc241.pcaec445                  | 0.038676295  | 0.034013209 | 0.25748294  |
| lysopcac180.asparticacid           | 0.014117602  | 0.012417046 | 0.257542497 |
| methionine.pcaec401                | 0.025537153  | 0.022461344 | 0.257548928 |
| smohc241.leucine                   | 0.006626261  | 0.005828933 | 0.257611423 |
| pcaec322.c2                        | 0.053520251  | 0.047085497 | 0.257664288 |
| glycine.pcaec404                   | 0.02951221   | 0.025965908 | 0.257700029 |
| pcaac422.pcaec384                  | -0.062257315 | 0.054788211 | 0.257803599 |
| pcaec360.leucine                   | 0.007199375  | 0.00633588  | 0.257820407 |
| pcaac402.pcaac426                  | 0.103512226  | 0.091099196 | 0.257832136 |
| pcaec322.valine                    | 0.060679392  | 0.053404563 | 0.257847678 |
| smohc141.c162                      | -0.084959071 | 0.074788799 | 0.257945485 |
| creatinine.pcaac405                | 0.013766303  | 0.012119093 | 0.257973859 |
| phenylalanine.c141oh               | -0.11490634  | 0.101160659 | 0.257990056 |
| pcaec423.pcaac405                  | -0.049973908 | 0.043999393 | 0.258029009 |
| smc161.pcaac384                    | -0.0573389   | 0.050487512 | 0.258063092 |
| pcaac406.leucine                   | 0.00635621   | 0.005596924 | 0.258081169 |
| creatinine.pcaac420                | 0.091667311  | 0.080729655 | 0.258154736 |
| pcaec343.lysine                    | -0.064886355 | 0.057145171 | 0.25816298  |
| pcaac342.glycine                   | 0.038315547  | 0.033744849 | 0.258169856 |
| pcaac386.arginine                  | -0.031171955 | 0.027457241 | 0.258235751 |
| c141.tyrosine                      | 0.090067744  | 0.079354753 | 0.258356654 |
| pcaac404.pcaec446                  | -0.036590134 | 0.032242257 | 0.258419701 |
| pcaac363.c0                        | 0.004954441  | 0.004365824 | 0.25843072  |
| c14.c2                             | 0.063237849  | 0.055725689 | 0.258438166 |
| c5.pcaac404                        | 0.007123432  | 0.006277309 | 0.258444611 |
| pcaac300.phenylalanine             | -0.036674303 | 0.032319916 | 0.258470897 |

|                               |              |             |             |
|-------------------------------|--------------|-------------|-------------|
| pcaac343.kynurenine           | -0.008729541 | 0.007693108 | 0.258473174 |
| pcaac421.c141                 | -0.028111731 | 0.024777366 | 0.258535503 |
| c14.c101                      | -0.01176159  | 0.010366691 | 0.25854267  |
| serine.leucine                | -0.008777944 | 0.007737159 | 0.258558609 |
| pcaac381.pcaec420             | 0.043994064  | 0.03877798  | 0.258561197 |
| glutamine.histidine           | 0.037123548  | 0.032728749 | 0.258658144 |
| c181.kynurenine               | -0.008774199 | 0.007739375 | 0.258896619 |
| lysopcac170.lysopcac160       | 0.013482716  | 0.011893458 | 0.258931937 |
| c141oh.pcaec362               | 0.013166036  | 0.011614275 | 0.258938798 |
| lysopcac203.pcaac425          | -0.077269362 | 0.06817303  | 0.259013258 |
| pcaac323.c102                 | 0.024704316  | 0.021796183 | 0.259015827 |
| pcaac386.lysopcac181          | 0.020868049  | 0.018413719 | 0.259072645 |
| pcaec405.pcaec424             | -0.036016469 | 0.03178151  | 0.259087615 |
| lysopcac181.pcaec420          | 0.053773093  | 0.047451097 | 0.259096183 |
| prolinr.spermidine            | -0.064785076 | 0.057169616 | 0.259106083 |
| lysine.pcaac381               | 0.021892676  | 0.01932223  | 0.259180421 |
| isoleucine.pcaac321           | 0.033509221  | 0.029575297 | 0.259187397 |
| pcaac380.pcaac361             | -0.073835788 | 0.065170206 | 0.259206381 |
| pcaec301.c3                   | 0.04113721   | 0.036314698 | 0.2592778   |
| pcaec363.glutamine            | -0.011686223 | 0.010317296 | 0.259325986 |
| pcaec445.alanine              | -0.009070081 | 0.008007637 | 0.25932763  |
| c8.pcaec382                   | -0.010634625 | 0.009390403 | 0.259402783 |
| smc161.smc240                 | -0.067034779 | 0.059199515 | 0.259463824 |
| lysopcac170.pcaac383          | 0.015624676  | 0.013798586 | 0.259469921 |
| pcaac360.citruline            | 0.006383629  | 0.005638099 | 0.259515273 |
| ornithine.pcaac421            | -0.009188938 | 0.008118982 | 0.259702213 |
| c2.pcaec340                   | 0.047973799  | 0.042390971 | 0.259738229 |
| pcaec424.pcaac405             | -0.046338434 | 0.040954406 | 0.259836546 |
| pcaac404.histidine            | 0.042631217  | 0.037678893 | 0.259848697 |
| serotonin.c102                | 0.048036489  | 0.042457425 | 0.259861781 |
| lysopcac181.leucine           | -0.007604562 | 0.006722621 | 0.259951391 |
| smc202.pcaec382               | 0.007220252  | 0.006383769 | 0.260017324 |
| alanine.pcaec364              | -0.022222209 | 0.019649461 | 0.260059518 |
| c141.arginine                 | 0.036919863  | 0.032646484 | 0.260073622 |
| pcaac384.pcaec424             | -0.003782136 | 0.003345527 | 0.260238645 |
| c12.pcaec445                  | -0.037083485 | 0.032802998 | 0.260244749 |
| alphaaminoadipicacid.c5       | -0.016554226 | 0.014644811 | 0.260290515 |
| lysopcac181.lysopcac203       | -0.010378831 | 0.009183144 | 0.260364852 |
| pcaec384.pcaec363             | 0.029848032  | 0.026412577 | 0.260421821 |
| c2.lysopcac160                | 0.008970735  | 0.007939458 | 0.260495847 |
| alphaaminoadipicacid.pcaec343 | -0.062342504 | 0.055179761 | 0.260531606 |
| pcaec381.lysopcac161          | 0.050455562  | 0.044661567 | 0.260563669 |
| h1.pcaec406                   | 0.016364164  | 0.014490739 | 0.260751389 |
| arginine.citruline            | 0.014169148  | 0.01254719  | 0.260757963 |
| smc240.arginine               | -0.032224931 | 0.028544712 | 0.260901059 |

|                              |              |             |             |
|------------------------------|--------------|-------------|-------------|
| histidine.pcaec382           | -0.024312595 | 0.021536877 | 0.260920446 |
| pcaac342.lysopcac160         | -0.032013102 | 0.028360538 | 0.260959011 |
| pcaec384.pcaec445            | 0.032677038  | 0.028952044 | 0.261013471 |
| c12.pcaac381                 | -0.009862771 | 0.008738635 | 0.26102234  |
| pcaac402.pcaac365            | 0.090135553  | 0.079867419 | 0.261053888 |
| prolinr.pcaac240             | 0.013011978  | 0.011529711 | 0.261055629 |
| asparticacid.pcaac426        | 0.071126467  | 0.063024424 | 0.261058399 |
| lysopcac204.c8               | -0.057591946 | 0.051032517 | 0.261066698 |
| asparagine.pcaec364          | -0.018977543 | 0.016817599 | 0.261109069 |
| pcaec385.pcaec424            | -0.008342039 | 0.007393484 | 0.261166856 |
| pcaec445.c3                  | -0.017042339 | 0.015104849 | 0.261178114 |
| methioninesulfoxide.pcaac320 | -0.122035321 | 0.1081787   | 0.261253564 |
| pcaac363.pcaac341            | 0.009191831  | 0.008149142 | 0.261312247 |
| pcaec361.histidine           | 0.077339017  | 0.06858368  | 0.261434933 |
| pcaec340.c8                  | 0.043310223  | 0.038410991 | 0.261481888 |
| pcaec321.pcaac361            | 0.088341043  | 0.078361525 | 0.261564175 |
| pcaac281.pcaec424            | -0.006044858 | 0.005362315 | 0.261592464 |
| lysopcac140.pcaac405         | 0.012645106  | 0.011217432 | 0.261597664 |
| pcaec403.pcaac343            | 0.014649074  | 0.012996208 | 0.261636466 |
| pcaec401.c2                  | 0.056097458  | 0.049776855 | 0.26172151  |
| pcaac240.pcaac343            | 0.02328372   | 0.02066041  | 0.261724031 |
| c142.h1                      | 0.004743993  | 0.004209695 | 0.261745983 |
| lysopcac181.arginine         | 0.062643377  | 0.055598744 | 0.26183691  |
| glutamicacid.leucine         | -0.007585343 | 0.006733655 | 0.261930736 |
| histidine.c141               | 0.037256791  | 0.03307476  | 0.261947828 |
| citruline.prolinr            | 0.015396645  | 0.013668418 | 0.261948812 |
| pcaec424.lysopcac170         | -0.017755607 | 0.015765557 | 0.262038071 |
| creatinine.pcaac385          | 0.033086854  | 0.029379171 | 0.262049316 |
| pcaac366.lysopcac281         | 0.014821488  | 0.013161464 | 0.262080323 |
| smc180.pcaac366              | -0.058325472 | 0.051815029 | 0.262282714 |
| c18.pcaec342                 | -0.06770741  | 0.060151639 | 0.262297783 |
| pcaec363.c51dc               | -0.120683855 | 0.107234218 | 0.26237757  |
| pcaac426.pcaac420            | -0.080682293 | 0.07172335  | 0.262594269 |
| smc260.pcaec445              | 0.0687591    | 0.061129719 | 0.262637893 |
| c182.lysopcac182             | 0.017608499  | 0.015655308 | 0.262656548 |
| pcaac341.pcaec424            | -0.00329531  | 0.002929888 | 0.262673476 |
| pcaec381.leucine             | -0.004938032 | 0.004391003 | 0.262733713 |
| ornithine.smc181             | -0.024183887 | 0.021505462 | 0.262747789 |
| pcaec386.pcaec385            | -0.104100499 | 0.092591697 | 0.262853425 |
| lysopcac280.lysopcac203      | 0.023113069  | 0.020558014 | 0.262858137 |
| pcaac383.smohc161            | 0.020800676  | 0.018501817 | 0.262872796 |
| glutamicacid.pcaec384        | -0.066837221 | 0.059455109 | 0.262909831 |
| glycine.tyrosine             | 0.055606983  | 0.049465909 | 0.262916255 |
| smohc161.pcaac405            | -0.058138281 | 0.051718514 | 0.262924119 |
| smc161.pcaec443              | 0.047470543  | 0.042230205 | 0.262940683 |

|                                    |              |             |             |
|------------------------------------|--------------|-------------|-------------|
| pcaac281.serotonin                 | 0.099551853  | 0.088570901 | 0.262987428 |
| pcaac380.pcaec321                  | 0.046870981  | 0.041701773 | 0.262997014 |
| pcaac426.pcaec380                  | 0.061326552  | 0.0545687   | 0.263045795 |
| smc161.pcaec322                    | -0.084575244 | 0.075258232 | 0.263062961 |
| smc161.histidine                   | 0.053987421  | 0.048041187 | 0.263074338 |
| smohc221.pcaac381                  | -0.031383933 | 0.027927319 | 0.263075123 |
| serotonin.pcaec300                 | -0.008828469 | 0.00785678  | 0.263115967 |
| kynurenine.pcaac343                | -0.02465443  | 0.02194197  | 0.263139429 |
| lysopcac203.smohc222               | 0.021816696  | 0.019419611 | 0.263217024 |
| c0.pcaec402                        | -0.033126463 | 0.029490791 | 0.263282462 |
| c0.pcaac363                        | 0.026153081  | 0.023283964 | 0.263307308 |
| c101.valine                        | -0.053030781 | 0.047216807 | 0.263345099 |
| smohc222.smc240                    | -0.070022586 | 0.062348492 | 0.263366131 |
| pcaac385.lysopcac280               | 0.005091674  | 0.004534103 | 0.263413185 |
| smc202.c51dc                       | -0.116342132 | 0.103653144 | 0.263648107 |
| pcaec362.kynurenine                | -0.006352458 | 0.005659808 | 0.263663872 |
| pcaec423.pcaec405                  | -0.056661665 | 0.050497981 | 0.263800491 |
| lysopcac140.lysopcac203            | 0.015173942  | 0.013524363 | 0.263837387 |
| pcaec340.pcaec364                  | -0.033953903 | 0.030263646 | 0.26385178  |
| smohc221.pcaec444                  | -0.10771784  | 0.096012568 | 0.263861529 |
| smc181.lysopcac180                 | 0.056938016  | 0.05075187  | 0.263871683 |
| pcaac426.pcaec342                  | -0.090115723 | 0.080329958 | 0.263901506 |
| glutamicacid.pcaec425              | 0.021198849  | 0.018897482 | 0.26391759  |
| pcaac322.pcaec361                  | -0.012548846 | 0.011186614 | 0.263921078 |
| pcaac380.pcaac421                  | -0.025296391 | 0.022559274 | 0.264109043 |
| lysopcac203.pcaac426               | -0.066675759 | 0.059463682 | 0.264127962 |
| pcaac422.pcaac421                  | -0.04168089  | 0.037173589 | 0.264142933 |
| pcaac342.leucine                   | 0.005274531  | 0.004704451 | 0.264173074 |
| pcaac365.pcaec446                  | -0.050068391 | 0.044657801 | 0.264182553 |
| pcaac323.smohc241                  | 0.066237716  | 0.059083356 | 0.264211142 |
| smc240.c0                          | -0.000517232 | 0.000461438 | 0.264286227 |
| c2.smohc141                        | 0.016912041  | 0.015091022 | 0.264389422 |
| pcaac422.pcaac403                  | -0.024248191 | 0.02163894  | 0.264426649 |
| pcaec300.lysopcac170               | 0.015944492  | 0.014228961 | 0.264433078 |
| c101.asparagine                    | -0.005631954 | 0.005026177 | 0.264450774 |
| c8.citruline                       | -0.004536319 | 0.004048761 | 0.264494412 |
| c5.pcaec380                        | 0.063311402  | 0.056517952 | 0.264588538 |
| kynurenine.tyrosine                | 0.067286023  | 0.060075436 | 0.264662556 |
| lysopcac281.lysopcac161            | 0.071290947  | 0.063658166 | 0.26471475  |
| pcaec382.prolinr                   | -0.025253506 | 0.022550203 | 0.264724655 |
| asymmetricdimethylarginine.pcaac42 | 0.008360593  | 0.007465753 | 0.264733141 |
| pcaec342.pcaac385                  | -0.020252413 | 0.018085435 | 0.264750291 |
| lysopcac170.leucine                | -0.006102494 | 0.005450018 | 0.264792379 |
| smc181.phenylalanine               | -0.045692954 | 0.040808105 | 0.264799568 |
| c142.pcaec362                      | 0.015815352  | 0.014124617 | 0.264800255 |

|                              |              |             |             |
|------------------------------|--------------|-------------|-------------|
| pcaac366.isoleucine          | -0.037318046 | 0.033340724 | 0.26497365  |
| pcaac322.pcaac321            | -0.053527681 | 0.047834444 | 0.265089941 |
| c8.pcaec444                  | -0.09309965  | 0.083199852 | 0.265103304 |
| alanine.pcaac405             | 0.026949271  | 0.02408401  | 0.265111273 |
| c0.pcaec404                  | -0.014655692 | 0.013099989 | 0.265201984 |
| lysopcac182.c141oh           | 0.092451696  | 0.082658664 | 0.265321283 |
| pcaec384.pcaac380            | -0.065027389 | 0.058141098 | 0.265335979 |
| lysopcac204.pcaec424         | -0.005326141 | 0.004762271 | 0.26535183  |
| pcaec381.pcaec385            | -0.068042987 | 0.060844326 | 0.265390535 |
| pcaac300.pcaec424            | -0.003535486 | 0.003161679 | 0.265425464 |
| pcaec322.smohc161            | -0.014674152 | 0.01312522  | 0.265518557 |
| kynurenine.lysopcac181       | 0.053463567  | 0.047822309 | 0.265539415 |
| c141oh.histidine             | 0.046971606  | 0.042017364 | 0.265562197 |
| lysine.pcaac421              | 0.030368926  | 0.027165982 | 0.265565014 |
| pcaac342.lysopcac161         | 0.062406321  | 0.05582477  | 0.265567633 |
| pcaec360.pcaec343            | 0.083742319  | 0.074925622 | 0.265662966 |
| spermidine.c162              | 0.04491307   | 0.040188404 | 0.265709685 |
| smc202.lysopcac280           | 0.007670025  | 0.00686408  | 0.265772696 |
| c101.leucine                 | 0.005059795  | 0.004529155 | 0.265880893 |
| lysopcac180.leucine          | -0.00429131  | 0.003841692 | 0.265933918 |
| smohc241.pcaec341            | 0.065177894  | 0.058352369 | 0.265961879 |
| smohc222.pcaec364            | 0.042169081  | 0.037753854 | 0.265971725 |
| pcaac426.pcaec301            | 0.081713167  | 0.073158419 | 0.26597733  |
| pcaac364.pcaec363            | 0.029486234  | 0.026407316 | 0.266122731 |
| c182.smohc241                | 0.067605959  | 0.060554052 | 0.266181125 |
| pcaec343.pcaec384            | -0.027984126 | 0.025068148 | 0.266238429 |
| pcaac426.smc240              | 0.029007453  | 0.025992422 | 0.266377218 |
| smc261.smc180                | -0.008912643 | 0.007986349 | 0.266382283 |
| smohc241.alanine             | -0.019457492 | 0.017436319 | 0.26641099  |
| pcaec361.pcaac425            | 0.09165951   | 0.082148384 | 0.266469673 |
| c10.pcaac384                 | 0.089827533  | 0.080511362 | 0.2664984   |
| c0.smohc222                  | -0.009530016 | 0.008542146 | 0.266526483 |
| lysopcac161.pcaac365         | -0.038263452 | 0.034297184 | 0.266527568 |
| c51.lysopcac161              | -0.052103878 | 0.046703389 | 0.266531991 |
| pcaec362.pcaec341            | 0.09409944   | 0.084348297 | 0.266543972 |
| pcaac341.pcaec364            | -0.013952345 | 0.012506958 | 0.266560662 |
| c142.c3                      | 0.04350715   | 0.039012607 | 0.266713955 |
| pcaec364.pcaac362            | -0.025246501 | 0.022638936 | 0.266725434 |
| lysopcac280.smc160           | 0.083220077  | 0.074665004 | 0.266982158 |
| methioninesulfoxide.smohc222 | 0.010987602  | 0.009859037 | 0.267028883 |
| c10.citruline                | -0.005044609 | 0.004527492 | 0.26713703  |
| pcaec443.leucine             | -0.007981934 | 0.007163783 | 0.267141505 |
| acetylmithoine.pcaec383      | -0.066943916 | 0.060084116 | 0.267157132 |
| phenylalanine.pcaac322       | 0.045864635  | 0.041171004 | 0.267228358 |
| histidine.smohc161           | 0.009674059  | 0.008686442 | 0.267359591 |

|                         |              |             |             |
|-------------------------|--------------|-------------|-------------|
| smohc222.pcaac420       | 0.054150523  | 0.048628156 | 0.267416569 |
| pcaac404.lysopcac203    | 0.018104274  | 0.016259313 | 0.267455961 |
| lysopcac281.lysopcac203 | 0.018808154  | 0.016892311 | 0.267479899 |
| c8.pcaac384             | 0.077963604  | 0.070030466 | 0.267537161 |
| pcaec424.leucine        | -0.010891887 | 0.009784387 | 0.267575982 |
| pcaac365.c12            | 0.058186636  | 0.052287954 | 0.26773819  |
| pcaac386.c141           | -0.034491874 | 0.031006006 | 0.267903424 |
| pcaec322.c18            | -0.021857445 | 0.019650678 | 0.267957289 |
| lysopcac281.pcaec404    | -0.071017719 | 0.063851824 | 0.267988479 |
| pcaec384.pcaec405       | -0.070382814 | 0.06328318  | 0.268005026 |
| acetylmithoine.c16      | -0.047937874 | 0.043106466 | 0.268051081 |
| pcaac323.pcaac405       | 0.040529441  | 0.036450603 | 0.268128373 |
| pcaec403.leucine        | -0.005916148 | 0.005320857 | 0.268137632 |
| alanine.c182            | 0.054264362  | 0.048805131 | 0.268146668 |
| pcaac385.c102           | 0.026710825  | 0.024023843 | 0.268151501 |
| c101.serotonin          | 0.065654294  | 0.059050141 | 0.268154361 |
| histidine.smc261        | 0.020860941  | 0.018763529 | 0.268179399 |
| c182.c5                 | -0.008261043 | 0.007430749 | 0.268198123 |
| pcaac322.histidine      | 0.050124451  | 0.045086871 | 0.268201161 |
| pcaec425.asparticacid   | 0.030022161  | 0.027005393 | 0.268210045 |
| smohc222.smc161         | 0.11687559   | 0.105161162 | 0.268344991 |
| pcaec300.pcaac421       | 0.010488409  | 0.009438988 | 0.268437425 |
| smc240.spermidine       | 0.058408507  | 0.052573231 | 0.268517254 |
| c4.lysopcac204          | 0.045994069  | 0.04140297  | 0.268562351 |
| c162.smohc221           | -0.060812123 | 0.05474376  | 0.268578586 |
| pcaac404.pcaac365       | -0.027330922 | 0.024604957 | 0.268604774 |
| smc161.kynurenine       | -0.004296103 | 0.003867881 | 0.268637754 |
| pcaec422.pcaac343       | 0.017202735  | 0.015491142 | 0.268733831 |
| pcaec406.pcaac343       | 0.028632028  | 0.025789453 | 0.268848047 |
| c0.lysopcac140          | 0.003612527  | 0.003253981 | 0.268863317 |
| asparagine.pcaac425     | -0.065598423 | 0.059096744 | 0.268935994 |
| pcaac425.c4             | -0.016860389 | 0.01519021  | 0.268964559 |
| pcaec382.pcaec404       | 0.03957636   | 0.035660617 | 0.269026926 |
| smohc221.pcaac384       | -0.045682525 | 0.041172884 | 0.269145651 |
| smohc241.smc261         | 0.026531446  | 0.023912397 | 0.269146755 |
| acetylmithoine.pcaec404 | 0.023004341  | 0.020737539 | 0.269240313 |
| glutamicacid.pcaac402   | -0.082193235 | 0.074095024 | 0.269246393 |
| pcaec384.pcaec424       | -0.03299844  | 0.029750533 | 0.269299489 |
| pcaac384.c162           | -0.061594253 | 0.05554189  | 0.269386342 |
| pcaec343.c18            | -0.0276504   | 0.024933707 | 0.269391806 |
| c8.pcaac343             | 0.013785222  | 0.012431398 | 0.269414593 |
| pcaac321.pcaec444       | 0.064168035  | 0.057878003 | 0.269511849 |
| pcaac406.smohc161       | -0.014371672 | 0.01296336  | 0.269528863 |
| pcaac404.pcaac323       | -0.120784394 | 0.108963322 | 0.269593867 |
| pcaac420.leucine        | 0.007110437  | 0.006414639 | 0.269600936 |



|                               |              |             |             |
|-------------------------------|--------------|-------------|-------------|
| c3.pcaec422                   | -0.027478837 | 0.024790185 | 0.269606942 |
| lysopcac160.pcaec424          | -0.004035274 | 0.003641069 | 0.269688682 |
| pcaac320.leucine              | 0.004354018  | 0.003929471 | 0.269785361 |
| prolinr.c2                    | -0.054281349 | 0.048989855 | 0.269798079 |
| c102.pcaec380                 | -0.049301352 | 0.044495346 | 0.269798349 |
| pcaec422.pcaec424             | -0.005710557 | 0.005153917 | 0.269801849 |
| serotonin.pcaec424            | 0.003743678  | 0.003379497 | 0.269905748 |
| glutamicacid.isoleucine       | -0.031243257 | 0.028207556 | 0.269966774 |
| c181.pcaec301                 | -0.03548263  | 0.03204331  | 0.270090206 |
| putrescine.phenylalanine      | 0.025142167  | 0.022709277 | 0.270176979 |
| pcaac402.pcaac281             | -0.004480382 | 0.004047291 | 0.270230505 |
| creatinine.smc241             | 0.069646229  | 0.062919031 | 0.270269024 |
| asparagine.pcaec360           | 0.006329959  | 0.005719177 | 0.270322026 |
| acetylmornithoine.pcaac421    | 0.012134956  | 0.010966217 | 0.270416449 |
| c16.pcaec341                  | 0.059780826  | 0.054023395 | 0.270417883 |
| pcaec406.leucine              | 0.00604011   | 0.005459249 | 0.270492661 |
| pcaac386.pcaec365             | -0.020839978 | 0.018836584 | 0.270511161 |
| lysopcac281.pcaec444          | 0.125353746  | 0.113316111 | 0.270565471 |
| pcaec384.pcaec403             | -0.037481606 | 0.033886425 | 0.270623916 |
| ornithine.transhydroxyproline | -0.031137238 | 0.028158459 | 0.270757082 |
| pcaac426.c4                   | -0.013579875 | 0.012281117 | 0.2707717   |
| arginine.pcaac421             | 0.013194177  | 0.011932348 | 0.270773377 |
| c2.lysopcac140                | -0.002945367 | 0.002664046 | 0.27083773  |
| pcaac343.pcaac364             | 0.072044706  | 0.065164053 | 0.270841895 |
| pcaac365.pcaac361             | -0.068565344 | 0.062022052 | 0.270880847 |
| pcaac424.pcaac426             | 0.094780093  | 0.085751469 | 0.270971982 |
| pcaac385.pcaac381             | -0.051234901 | 0.046356205 | 0.270991244 |
| glutamine.leucine             | 0.004360597  | 0.003945847 | 0.271048763 |
| h1.kynurenine                 | -0.011611398 | 0.010510472 | 0.271206266 |
| lysopcac181.smohc241          | 0.060980236  | 0.055202771 | 0.271243707 |
| pcaec361.pcaac344             | 0.098825966  | 0.08947523  | 0.271309599 |
| lysopcac203.pcaac361          | -0.069146935 | 0.06261345  | 0.271378759 |
| pcaac240.lysopcac140          | 0.00319409   | 0.002892713 | 0.271448484 |
| c8.asparagine                 | -0.005465509 | 0.004949898 | 0.271456652 |
| pcaec382.spermidine           | -0.055618509 | 0.050372635 | 0.271467345 |
| c181.pcaac403                 | -0.003933348 | 0.003562369 | 0.271468683 |
| lysopcac281.pcaec383          | -0.050712012 | 0.045930886 | 0.271487845 |
| pcaec422.c51dc                | -0.121002747 | 0.109599456 | 0.271508931 |
| pcaec341.pcaec383             | -0.057185991 | 0.051800613 | 0.271544173 |
| pcaac342.c162                 | -0.066890116 | 0.060604583 | 0.271652157 |
| glutamine.pcaec383            | -0.044212474 | 0.040058332 | 0.271657139 |
| lysopcac160.pcaac405          | -0.076531261 | 0.069346716 | 0.271699974 |
| asparagine.lysopcac160        | 0.008744577  | 0.007926215 | 0.271853854 |
| pcaac344.pcaac321             | -0.048847061 | 0.044277815 | 0.271876582 |
| lysopcac281.pcaac381          | -0.049293303 | 0.044691064 | 0.27197004  |

|                                 |              |             |             |
|---------------------------------|--------------|-------------|-------------|
| pcaec443.c141oh                 | 0.073374493  | 0.066524028 | 0.271970746 |
| methioninesulfoxide.lysopcac140 | 0.002925989  | 0.002653076 | 0.272018621 |
| histidine.kynurenine            | -0.011157641 | 0.010120018 | 0.272163606 |
| histidine.lysopcac280           | 0.020391433  | 0.018497844 | 0.272234446 |
| lysopcac182.phenylalanine       | -0.0590673   | 0.053585639 | 0.272265161 |
| pcaec381.pcaec402               | -0.096700198 | 0.087727234 | 0.272271512 |
| lysopcac203.pcaac421            | -0.016062    | 0.014571764 | 0.272277472 |
| pcaec341.pcaec424               | -0.005762059 | 0.00522773  | 0.272302703 |
| pcaec343.pcaac362               | -0.013768697 | 0.012493223 | 0.27235346  |
| pcaec362.lysopcac160            | 0.021617515  | 0.019615369 | 0.272363435 |
| c8.lysopcac204                  | 0.02088905   | 0.018954622 | 0.272369743 |
| pcaac343.pcaac404               | 0.004881126  | 0.004429238 | 0.272383553 |
| pcaec364.c14                    | -0.046667091 | 0.042355015 | 0.272477106 |
| c182.pcaac421                   | -0.008818672 | 0.008004945 | 0.272544206 |
| pcaac385.pcaec343               | -0.09488325  | 0.086136741 | 0.27259228  |
| pcaec446.pcaac366               | -0.064772127 | 0.058806101 | 0.272631138 |
| pcaac384.pcaac380               | -0.047319088 | 0.042964093 | 0.272669666 |
| serotonin.pcaac380              | 0.057851679  | 0.052545044 | 0.272830749 |
| pcaec401.c18                    | -0.036305099 | 0.032979125 | 0.272892001 |
| isoleucine.pcaac281             | -0.003434389 | 0.00311983  | 0.272902867 |
| c10.asparagine                  | -0.004743826 | 0.004309571 | 0.272929119 |
| pcaac384.pcaec384               | 0.072883562  | 0.066217035 | 0.272967468 |
| pcaec445.lysopcac182            | 0.032655347  | 0.029670668 | 0.273003617 |
| smc161.spermidine               | 0.05761393   | 0.052351724 | 0.273037117 |
| pcaac364.pcaec343               | -0.065601613 | 0.059610302 | 0.273040761 |
| pcaec406.c5                     | -0.007484702 | 0.006801279 | 0.273050935 |
| pcaac405.valine                 | -0.040972377 | 0.037241141 | 0.273178219 |
| pcaac424.leucine                | -0.017654841 | 0.016047485 | 0.273190693 |
| c101.smc181                     | -0.027188476 | 0.024713523 | 0.273197997 |
| pcaec341.c2                     | 0.048089793  | 0.043713581 | 0.273213031 |
| c5.c51dc                        | 0.212672126  | 0.193329007 | 0.273238294 |
| smc181.c14                      | -0.023133938 | 0.021037412 | 0.27341016  |
| pcaac425.pcaac281               | 0.004108588  | 0.003736956 | 0.27350105  |
| pcaec423.leucine                | 0.013788176  | 0.012545357 | 0.273666944 |
| lysopcac181.pcaac421            | -0.007562658 | 0.006882044 | 0.273740394 |
| pcaec383.c51dc                  | -0.13630122  | 0.124037546 | 0.27375185  |
| pcaac420.c51dc                  | -0.119261547 | 0.108536613 | 0.273776492 |
| lysopcac182.c4                  | -0.035638228 | 0.032433867 | 0.27378399  |
| asparagine.glycine              | 0.028372131  | 0.025821553 | 0.273792525 |
| c12.pcaec360                    | 0.006013813  | 0.005473191 | 0.2737928   |
| pcaac424.smc261                 | 0.069384112  | 0.063154964 | 0.273855285 |
| pcaec382.pcaac403               | 0.013725924  | 0.012494851 | 0.273901517 |
| putrescine.c141                 | 0.026571316  | 0.024188696 | 0.273912407 |
| pcaac383.smohc221               | 0.045267557  | 0.041212853 | 0.273963266 |
| pcaac422.pcaec406               | -0.078164443 | 0.071173326 | 0.274031898 |

|                              |              |             |             |
|------------------------------|--------------|-------------|-------------|
| pcaac365.c16                 | 0.032803922  | 0.02987196  | 0.274064822 |
| pcaec363.pcaac420            | 0.04476728   | 0.040771866 | 0.274132942 |
| pcaec322.pcaec385            | -0.045897278 | 0.041807857 | 0.274211157 |
| pcaac406.tyrosine            | 0.043860582  | 0.039953964 | 0.274227118 |
| pcaac362.pcaec424            | -0.002992206 | 0.002725735 | 0.274234502 |
| glycine.glutamicacid         | 0.044259359  | 0.040318031 | 0.274236702 |
| pcaac406.ornithine           | -0.014527286 | 0.013234037 | 0.274251729 |
| lysopcac181.pcaec384         | -0.035294321 | 0.0321554   | 0.274297071 |
| pcaac383.c16                 | 0.041388311  | 0.037711688 | 0.274351199 |
| pcaec343.leucine             | 0.010718283  | 0.009768403 | 0.2744613   |
| pcaec384.pcaec321            | 0.059213733  | 0.053966387 | 0.274464109 |
| leucine.pcaac321             | 0.028515926  | 0.02599165  | 0.274514149 |
| pcaec424.smohc221            | 0.047851532  | 0.043617256 | 0.274531869 |
| c101.taurine                 | -0.042648767 | 0.038878855 | 0.274580827 |
| pcaac344.asparagine          | 0.008400829  | 0.007658541 | 0.274599408 |
| c0.lysine                    | 0.081011681  | 0.073854693 | 0.274606647 |
| lysopcac182.lysopcac280      | 0.009021024  | 0.008224344 | 0.274623169 |
| smc261.c51dc                 | -0.11239698  | 0.102480663 | 0.274669175 |
| pcaac406.glycine             | 0.044967341  | 0.041000639 | 0.274675922 |
| pcaec384.spermidine          | 0.057282654  | 0.052237142 | 0.274745095 |
| creatinine.c51               | -0.117184946 | 0.106880147 | 0.274820955 |
| pcaec386.leucine             | 0.007131852  | 0.006505025 | 0.274844522 |
| smc180.pcaac421              | -0.027441743 | 0.025031287 | 0.27487186  |
| pcaac363.transhydroxyproline | 0.016350899  | 0.01491546  | 0.27489775  |
| alphaaminoadipicacid.smc180  | -0.021482549 | 0.019599907 | 0.274978297 |
| pcaac323.c51                 | -0.08473491  | 0.077318785 | 0.275038209 |
| alanine.leucine              | -0.007984973 | 0.007286265 | 0.275047968 |
| lysopcac160.c51              | -0.070896039 | 0.064692737 | 0.275050216 |
| smc260.pcaac405              | -0.030155095 | 0.027518664 | 0.275086637 |
| pcaec383.pcaac425            | 0.107202781  | 0.097832853 | 0.275099859 |
| lysopcac160.lysine           | 0.075511662  | 0.068911676 | 0.275099992 |
| pcaac365.pcaac385            | -0.033819473 | 0.030865593 | 0.275131899 |
| pcaac323.pcaac385            | 0.026167341  | 0.023882176 | 0.27513906  |
| pcaec443.pcaec422            | 0.09653323   | 0.088117128 | 0.275215226 |
| citruiline.pcaac386          | 0.021477728  | 0.019606194 | 0.275238843 |
| pcaec420.pcaac365            | 0.035724057  | 0.032613707 | 0.275276738 |
| pcaac361.pcaec401            | 0.03335835   | 0.030460772 | 0.275383444 |
| isoleucine.pcaec364          | -0.019100716 | 0.017445675 | 0.275495459 |
| smc161.pcaac343              | 0.018254961  | 0.016673905 | 0.275515582 |
| pcaac402.pcaac405            | -0.058840919 | 0.05375901  | 0.27564263  |
| pcaec343.kynurenine          | -0.005380633 | 0.004917652 | 0.275810667 |
| smc161.c5                    | -0.005921312 | 0.005411903 | 0.27581904  |
| pcaec321.lysopcac160         | -0.0112839   | 0.010314273 | 0.275871101 |
| pcaac342.putrescine          | 0.023385615  | 0.021376166 | 0.275872917 |
| pcaac361.pcaec424            | -0.002625876 | 0.002400406 | 0.275905428 |

|                                    |              |             |             |
|------------------------------------|--------------|-------------|-------------|
| glutamine.c12                      | 0.085586156  | 0.078269692 | 0.276103105 |
| h1.arginine                        | 0.045537605  | 0.041647177 | 0.276130934 |
| pcaac402.asparticacid              | 0.071427029  | 0.065326839 | 0.276145989 |
| smc261.pcaac405                    | -0.018668681 | 0.017075269 | 0.276173365 |
| c51.lysopcac280                    | -0.011632378 | 0.010641251 | 0.276250729 |
| pcaec445.citruline                 | -0.006911786 | 0.006323084 | 0.276266671 |
| h1.pcaac405                        | 0.071886524  | 0.065765911 | 0.276282844 |
| asymmetricdimethylarginine.lysopca | -0.002028188 | 0.001855991 | 0.276408805 |
| pcaac405.c18                       | -0.041239448 | 0.037741613 | 0.276452698 |
| pcaec341.pcaac323                  | -0.080379637 | 0.073568817 | 0.276496869 |
| pcaac380.alanine                   | -0.014311594 | 0.013100264 | 0.276545651 |
| pcaac380.alphaaminoadipicacid      | 0.012652557  | 0.011584203 | 0.276651175 |
| lysopcac203.pcaec340               | 0.039339767  | 0.036028477 | 0.276790227 |
| smc202.pcaac343                    | 0.022617517  | 0.020715359 | 0.276827028 |
| c10.pcaec365                       | -0.02236531  | 0.020492152 | 0.277008872 |
| pcaac364.phenylalanine             | -0.046       | 0.042148342 | 0.277019888 |
| alphaaminoadipicacid.pcaec301      | 0.047044405  | 0.043106979 | 0.277038547 |
| smc160.pcaac402                    | 0.080408447  | 0.073687167 | 0.277094256 |
| pcaec300.pcaec322                  | -0.059173601 | 0.05422819  | 0.277101889 |
| pcaac403.pcaac405                  | -0.048429379 | 0.044388954 | 0.277177774 |
| pcaec403.arginine                  | -0.103772266 | 0.095115999 | 0.27718467  |
| pcaac424.pcaec321                  | 0.028245997  | 0.02589647  | 0.277307356 |
| pcaec423.c141oh                    | 0.085350755  | 0.078265576 | 0.277395214 |
| pcaec402.citruline                 | 0.019894905  | 0.018243636 | 0.277401942 |
| lysopcac181.pcaec424               | -0.006231033 | 0.005714043 | 0.277417309 |
| lysopcac280.pcaec380               | 0.037615738  | 0.034495008 | 0.277420818 |
| glutamine.pcaec385                 | 0.051641426  | 0.04736828  | 0.277533975 |
| pcaac362.putrescine                | 0.021116727  | 0.019371043 | 0.277574755 |
| pcaac425.pcaec424                  | -0.013396619 | 0.012291419 | 0.277663364 |
| c142.lysopcac181                   | 0.045695644  | 0.041929951 | 0.277710417 |
| c162.pcaec383                      | 0.06560804   | 0.060203481 | 0.277726924 |
| pcaac404.smc240                    | 0.021415961  | 0.019657453 | 0.277864789 |
| pcaec381.pcaec364                  | 0.005243793  | 0.00481322  | 0.277865333 |
| pcaec443.lysopcac140               | 0.001748647  | 0.001605253 | 0.277921833 |
| smohc241.spermidine                | 0.058601509  | 0.053796372 | 0.277924849 |
| c16.pcaac421                       | -0.046386663 | 0.042583601 | 0.277930436 |
| c51dc.c182                         | 0.058688375  | 0.053880274 | 0.277961785 |
| kynurenine.leucine                 | 0.028391128  | 0.02606527  | 0.277963843 |
| lysopcac281.glutamine              | -0.013185814 | 0.012105792 | 0.277971205 |
| pcaac381.smc161                    | 0.086898187  | 0.07978623  | 0.278005324 |
| pcaac240.pcaac402                  | 0.063641501  | 0.05843706  | 0.278039171 |
| pcaec362.pcaec445                  | 0.022333594  | 0.020511469 | 0.27813855  |
| pcaec365.leucine                   | 0.007875477  | 0.00723322  | 0.278156947 |
| c5.pcaac386                        | 0.047984644  | 0.044072072 | 0.278163945 |
| c0.citruline                       | -0.00528562  | 0.004855073 | 0.278206464 |

|                                 |              |             |             |
|---------------------------------|--------------|-------------|-------------|
| pcaec301.pcaac402               | 0.042891648  | 0.03940772  | 0.278326345 |
| pcaac426.smc160                 | -0.076377192 | 0.070176136 | 0.278345285 |
| pcaec365.pcaec445               | 0.050109797  | 0.046046048 | 0.278393721 |
| lysopcac280.pcaec383            | -0.085356454 | 0.078442727 | 0.278445072 |
| pcaec362.pcaac404               | 0.003882286  | 0.003568607 | 0.278549569 |
| pcaac381.pcaec382               | -0.008049818 | 0.007399452 | 0.278552127 |
| pcaec382.pcaac365               | -0.052690833 | 0.048440145 | 0.278614841 |
| pcaac383.c14                    | 0.03087814   | 0.028387249 | 0.278616827 |
| methioninesulfoxide.lysopcac170 | -0.012694589 | 0.011670729 | 0.278624733 |
| c12.citruline                   | -0.008721326 | 0.008018437 | 0.278655421 |
| c141.pcaac384                   | 0.058140579  | 0.053456432 | 0.278670209 |
| pcaec383.acetylmithoine         | -0.065098077 | 0.059854648 | 0.278680244 |
| c2.pcaac426                     | 0.049874535  | 0.045867078 | 0.278782189 |
| pcaec321.pcaec365               | 0.023946998  | 0.022022922 | 0.278783983 |
| c18.lysopcac160                 | 0.009687958  | 0.008909699 | 0.278791633 |
| smc240.pcaac240                 | -0.011222983 | 0.010324094 | 0.278915996 |
| c8.pcaac421                     | 0.037989088  | 0.034946652 | 0.278919394 |
| lysopcac160.asparagine          | 0.014163491  | 0.013030053 | 0.278951535 |
| h1.pcaac361                     | 0.101359067  | 0.093271948 | 0.279075612 |
| pcaac422.pcaec301               | 0.080204774  | 0.073829795 | 0.279233241 |
| pcaac386.smc160                 | -0.063978605 | 0.058897553 | 0.279267451 |
| c8.pcaec360                     | 0.008640526  | 0.007954443 | 0.279275297 |
| kynurenine.lysine               | -0.095691011 | 0.088098124 | 0.279303869 |
| pcaac420.lysopcac280            | 0.006390183  | 0.005883662 | 0.279346807 |
| pcaec322.pcaac281               | 0.001621267  | 0.001492905 | 0.279394365 |
| c51.glycine                     | -0.024001664 | 0.022102303 | 0.279414821 |
| c142.prolinr                    | 0.043055849  | 0.039649063 | 0.279419891 |
| pcaec362.pcaec422               | 0.020061499  | 0.018474511 | 0.279429603 |
| smc160.lysopcac181              | 0.048875113  | 0.045021828 | 0.279568263 |
| c51dc.glutamicacid              | -0.063330066 | 0.058339218 | 0.279585137 |
| pcaac364.glycine                | 0.019368487  | 0.01784243  | 0.279593568 |
| pcaac405.smc181                 | -0.031693839 | 0.029201806 | 0.27967796  |
| c16.methionine                  | 0.012017726  | 0.011073059 | 0.279689491 |
| pcaec381.pcaec342               | 0.076193572  | 0.070215699 | 0.279767297 |
| smc261.pcaac381                 | -0.038804446 | 0.035760705 | 0.279776883 |
| pcaac404.pcaec340               | 0.062970104  | 0.058040289 | 0.279854698 |
| pcaec301.c162                   | 0.077402091  | 0.071350206 | 0.279906929 |
| pcaac380.pcaec424               | -0.005514246 | 0.005083316 | 0.27992725  |
| pcaac322.alphaaminoadipicacid   | 0.037837822  | 0.034882425 | 0.279948832 |
| putrescine.c102                 | -0.029641535 | 0.027327261 | 0.279965234 |
| c142.citruline                  | -0.008057527 | 0.007429852 | 0.280056746 |
| c182.pcaac425                   | 0.048908891  | 0.045102674 | 0.280096515 |
| c51.tryptophan                  | 0.021069165  | 0.019430921 | 0.280131352 |
| pcaac405.asparticacid           | 0.028683649  | 0.026456143 | 0.280182142 |
| pcaec341.glutamine              | -0.007875015 | 0.007263738 | 0.280200494 |

|                         |              |             |             |
|-------------------------|--------------|-------------|-------------|
| pcaec401.kynurenine     | -0.012014346 | 0.011083314 | 0.28026744  |
| c162.pcaec424           | 0.011627667  | 0.010727562 | 0.280310412 |
| pcaec425.lysopcac204    | -0.031852286 | 0.029387339 | 0.280322756 |
| smc160.smc180           | -0.015641317 | 0.014432816 | 0.280386839 |
| kynurenine.lysopcac140  | -0.000641721 | 0.00059215  | 0.280394962 |
| pcaac403.pcaec383       | -0.170383198 | 0.15723133  | 0.280424955 |
| putrescine.lysopcac203  | -0.007589859 | 0.007004022 | 0.280426622 |
| pcaac281.c5             | -0.007696062 | 0.007102043 | 0.28042765  |
| pcaec322.pcaec364       | 0.038390582  | 0.03543127  | 0.280479772 |
| creatinine.pcaec360     | 0.002366139  | 0.002183992 | 0.280533382 |
| lysopcac170.pcaec340    | 0.046488287  | 0.042913568 | 0.280577978 |
| pcaac403.pcaac365       | 0.080834848  | 0.074619878 | 0.280583306 |
| pcaac385.pcaec363       | 0.024786878  | 0.02288281  | 0.280618178 |
| pcaac403.pcaec404       | 0.033284235  | 0.030732276 | 0.280693849 |
| c4.smc202               | 0.061653207  | 0.056926725 | 0.280698679 |
| c12.c5                  | -0.008698727 | 0.008034553 | 0.280859168 |
| pcaec421.c4             | -0.025524205 | 0.023575884 | 0.280869901 |
| leucine.pcaac343        | 0.022018521  | 0.020339601 | 0.280912372 |
| glycine.pcaac381        | -0.016009861 | 0.014791401 | 0.280986797 |
| lysopcac204.pcaac421    | -0.007884208 | 0.007284281 | 0.280994382 |
| c4.pcaac386             | 0.025471105  | 0.023540313 | 0.281144206 |
| pcaac343.smc241         | 0.020438224  | 0.018890419 | 0.281181692 |
| pcaec401.lysopcac140    | 0.001126781  | 0.001041587 | 0.281245389 |
| pcaec343.pcaac405       | -0.027746696 | 0.025656542 | 0.281389541 |
| c141.h1                 | 0.008512908  | 0.007871818 | 0.281400839 |
| pcaac344.smc181         | 0.016233899  | 0.015011556 | 0.281407195 |
| pcaec343.pcaec445       | 0.045594575  | 0.042166819 | 0.281467664 |
| pcaec402.c5             | -0.006421374 | 0.005939405 | 0.281530892 |
| isoleucine.pcaac421     | 0.021090017  | 0.01950771  | 0.281546747 |
| c162.pcaac404           | 0.00169498   | 0.001568061 | 0.281622915 |
| lysopcac160.lysopcac280 | 0.012066472  | 0.011164002 | 0.281668385 |
| c14.pcaac406            | 0.046534743  | 0.043068584 | 0.281826889 |
| pcaec405.pcaac405       | -0.043131959 | 0.039919733 | 0.281832593 |
| pcaac421.pcaac406       | 0.035288398  | 0.032663886 | 0.281884962 |
| smc241.pcaac420         | 0.066911744  | 0.061937664 | 0.281903238 |
| prolinr.c3              | 0.051816848  | 0.047969504 | 0.281949317 |
| pcaec383.spermidine     | -0.054639823 | 0.05058805  | 0.281998329 |
| isoleucine.pcaec382     | -0.035774973 | 0.033129108 | 0.282099584 |
| pcaec363.c14            | -0.024870447 | 0.023031588 | 0.282110472 |
| pcaec321.lysopcac170    | 0.011831302  | 0.010956559 | 0.282111957 |
| pcaac420.lysopcac161    | -0.078286339 | 0.072503545 | 0.282146855 |
| pcaec343.pcaac344       | 0.071627254  | 0.066346244 | 0.282218338 |
| pcaec444.c141           | -0.015232992 | 0.014110194 | 0.282229066 |
| lysopcac170.pcaac421    | -0.008325769 | 0.007715513 | 0.282441661 |
| pcaac403.pcaac343       | 0.014933846  | 0.013839414 | 0.282447886 |

|                                    |              |             |             |
|------------------------------------|--------------|-------------|-------------|
| pcaac322.pcaac406                  | -0.049253215 | 0.045645064 | 0.282462428 |
| pcaac420.smc202                    | -0.052139405 | 0.04832333  | 0.282497253 |
| lysopcac160.pcaac364               | 0.054905361  | 0.050889188 | 0.282519303 |
| histidine.c14                      | 0.042337532  | 0.039254234 | 0.282685079 |
| pcaac422.smc202                    | -0.055990381 | 0.051926178 | 0.282808645 |
| c181.pcaec362                      | 0.01833757   | 0.017006606 | 0.282811866 |
| pcaac383.smc181                    | 0.028050229  | 0.026015323 | 0.282830582 |
| pcaac404.tyrosine                  | -0.065581077 | 0.060827248 | 0.282860178 |
| pcaec321.pcaac322                  | 0.05895815   | 0.054684781 | 0.282863496 |
| pcaac320.pcaec424                  | -0.003755473 | 0.003483531 | 0.282899226 |
| lysopcac140.pcaac402               | -0.036467203 | 0.033828836 | 0.282931887 |
| c12.lysopcac160                    | 0.015514145  | 0.014394112 | 0.283011853 |
| asymmetricdimethylarginine.pcaec40 | 0.050289994  | 0.046676366 | 0.283186711 |
| smc241.kynurenine                  | -0.004014638 | 0.003726218 | 0.283193779 |
| pcaac420.c14                       | -0.040553433 | 0.037641775 | 0.283216534 |
| c3.pcaec380                        | 0.034676109  | 0.032197438 | 0.28338044  |
| pcaac386.leucine                   | 0.004552586  | 0.004227269 | 0.283392249 |
| pcaac365.pcaec300                  | 0.033831484  | 0.031421035 | 0.283500197 |
| lysopcac180.pcaac421               | -0.005535385 | 0.005141585 | 0.28355509  |
| pcaec446.leucine                   | 0.004265943  | 0.003962483 | 0.283558692 |
| pcaac360.c141                      | -0.046021955 | 0.042758412 | 0.283673596 |
| lysopcac140.pcaac321               | -0.023269236 | 0.021620784 | 0.283709821 |
| pcaac344.pcaac365                  | -0.042434159 | 0.0394323   | 0.283761921 |
| c51dc.arginine                     | 0.040574481  | 0.037705798 | 0.283782519 |
| pcaec321.pcaac426                  | 0.058749436  | 0.054614671 | 0.283948638 |
| arginine.pcaec301                  | 0.042556667  | 0.039569353 | 0.284043284 |
| c16.valine                         | -0.06225383  | 0.057886443 | 0.284064754 |
| pcaac385.lysopcac170               | 0.008254154  | 0.007676009 | 0.284122309 |
| c4.c18                             | -0.054743175 | 0.050911609 | 0.284148727 |
| pcaac323.pcaec382                  | 0.007889366  | 0.007338083 | 0.284207994 |
| c14.pcaac366                       | -0.040580444 | 0.03774858  | 0.284255825 |
| pcaac341.c51                       | -0.063303613 | 0.058888149 | 0.284273025 |
| pcaac341.pcaac421                  | 0.013444843  | 0.012508791 | 0.284339498 |
| pcaec423.smc260                    | -0.031821205 | 0.029608386 | 0.284382025 |
| pcaac403.lysopcac161               | 0.064210073  | 0.059747733 | 0.284404281 |
| pcaac361.pcaac425                  | -0.079188794 | 0.07369984  | 0.284497649 |
| c12.pcaac405                       | 0.058785874  | 0.054711955 | 0.284504759 |
| citruline.c4                       | -0.016533392 | 0.015387616 | 0.284504894 |
| pcaec403.pcaac364                  | 0.005553262  | 0.005169347 | 0.284591156 |
| alanine.smohc221                   | 0.044550252  | 0.041470527 | 0.284593251 |
| pcaac323.c8                        | 0.038992764  | 0.03629736  | 0.28459504  |
| alanine.pcaec445                   | -0.033753694 | 0.031421508 | 0.28461128  |
| phenylalanine.kynurenine           | -0.004487128 | 0.004178157 | 0.284733382 |
| pcaec403.lysopcac180               | -0.057343691 | 0.053396812 | 0.284748193 |
| glutamicacid.pcaec322              | 0.062600974  | 0.058300179 | 0.284813471 |

|                         |              |             |             |
|-------------------------|--------------|-------------|-------------|
| pcaec401.pcaac421       | -0.012212685 | 0.011374709 | 0.284858043 |
| lysopcac161.pcaac404    | 0.008306071  | 0.007737269 | 0.284927542 |
| pcaac343.pcaec342       | 0.106013352  | 0.098770752 | 0.28501117  |
| c102.asparagine         | -0.016291327 | 0.015178968 | 0.285031034 |
| h1.lysopcac140          | -0.00077509  | 0.000722177 | 0.285037158 |
| c2.smc241               | 0.058336775  | 0.054359878 | 0.285086571 |
| smc240.smc181           | 0.011956512  | 0.01114229  | 0.285124005 |
| pcaac406.kynurenine     | -0.005454273 | 0.005083148 | 0.285152607 |
| glutamine.pcaac363      | 0.015444422  | 0.014393576 | 0.285153947 |
| c18.pcaec406            | -0.012263236 | 0.011429251 | 0.285171215 |
| pcaec362.arginine       | -0.027505758 | 0.025635771 | 0.28518235  |
| smc240.citruline        | -0.00913638  | 0.008515973 | 0.28522359  |
| pcaac426.c16            | 0.021992802  | 0.020500818 | 0.285257306 |
| pcaac322.pcaac361       | -0.05600354  | 0.052204915 | 0.285263132 |
| pcaac362.lysopcac161    | 0.053645948  | 0.050010401 | 0.285293513 |
| smohc241.arginine       | -0.022405123 | 0.020888039 | 0.285323257 |
| lysine.pcaac384         | -0.031999566 | 0.029833879 | 0.28534015  |
| pcaac321.pcaec382       | 0.013567751  | 0.012649801 | 0.285351418 |
| c16.pcaac381            | -0.014726392 | 0.013730146 | 0.285354683 |
| smohc161.pcaac404       | -0.019185337 | 0.017891909 | 0.285474469 |
| glutamine.pcaac381      | -0.019439221 | 0.018129217 | 0.285488794 |
| c12.pcaac404            | 0.002733645  | 0.002549468 | 0.285496859 |
| pcaec321.arginine       | -0.044073546 | 0.041105642 | 0.285514462 |
| histidine.smohc221      | -0.049835652 | 0.046481327 | 0.285530955 |
| c16.pcaec424            | -0.012640604 | 0.011790523 | 0.285560662 |
| smc181.pcaac344         | -0.055801011 | 0.052049972 | 0.285575215 |
| pcaec382.leucine        | -0.008687502 | 0.008105613 | 0.285699509 |
| pcaac360.pcaec385       | -0.058912415 | 0.054971502 | 0.285743513 |
| pcaec385.c5             | -0.008113093 | 0.007570665 | 0.285762075 |
| lysopcac281.lysopcac204 | -0.015149383 | 0.014136587 | 0.28576433  |
| leucine.lysopcac203     | 0.011287851  | 0.010536487 | 0.2859134   |
| smc261.pcaac421         | -0.01177577  | 0.01099358  | 0.285985509 |
| h1.pcaac403             | -0.00710915  | 0.006637872 | 0.286053335 |
| glutamicacid.pcaac405   | -0.046714895 | 0.043626146 | 0.286142018 |
| pcaac402.smc260         | -0.049297101 | 0.046047428 | 0.286244243 |
| smohc241.pcaac385       | -0.020841809 | 0.019475184 | 0.286423405 |
| methioninesulfoxide.c14 | 0.082099027  | 0.076732776 | 0.286530323 |
| creatinine.tyrosine     | 0.057608536  | 0.053844269 | 0.286541088 |
| pcaac344.pcaec385       | 0.037458827  | 0.035018815 | 0.286645652 |
| pcaac322.asparagine     | 0.006513813  | 0.006090791 | 0.28674639  |
| smc260.lysopcac203      | -0.024270922 | 0.02269887  | 0.286834269 |
| c51.pcaec445            | -0.056404474 | 0.052767195 | 0.286980699 |
| pcaac402.pcaec364       | 0.004528518  | 0.00423672  | 0.287006365 |
| c16.pcaac425            | 0.071022451  | 0.066454349 | 0.287066125 |
| lysopcac204.pcaac426    | -0.055409608 | 0.051849082 | 0.287097339 |



|                           |              |             |             |
|---------------------------|--------------|-------------|-------------|
| pcaec383.c2               | -0.079051906 | 0.073973125 | 0.287103561 |
| lysopcac280.pcaec424      | -0.002391253 | 0.002238657 | 0.287325023 |
| smohc141.arginine         | -0.030412252 | 0.028474392 | 0.287373534 |
| pcaec380.pcaec402         | 0.069386598  | 0.064972776 | 0.287428727 |
| pcaec322.pcaac381         | 0.02984351   | 0.027946888 | 0.287459376 |
| lysopcac181.pcaac385      | 0.025596224  | 0.023970147 | 0.287471802 |
| c51dc.lysopcac160         | 0.016587053  | 0.015535981 | 0.28755432  |
| pcaec421.pcaec364         | 0.005302881  | 0.004967176 | 0.287585505 |
| smc160.lysopcac281        | 0.020516598  | 0.019217982 | 0.287590786 |
| pcaec445.smc261           | 0.025769545  | 0.024146725 | 0.287755531 |
| lysopcac280.pcaac426      | 0.062086446  | 0.058183305 | 0.287810916 |
| glutamine.pcaec300        | 0.018803251  | 0.017621565 | 0.2878219   |
| smc260.pcaac421           | 0.02241705   | 0.02100943  | 0.287848741 |
| c51dc.pcaec341            | -0.081495484 | 0.076416835 | 0.28809161  |
| pcaec385.pcaec443         | 0.039293471  | 0.036844986 | 0.288094377 |
| pcaec421.phenylalanine    | -0.064818086 | 0.060781087 | 0.288110143 |
| c0.c142                   | -0.042104818 | 0.039509395 | 0.288437749 |
| creatinine.prolinr        | 0.033701547  | 0.031626939 | 0.288480585 |
| smc202.pcaec341           | 0.058430425  | 0.054833799 | 0.288482752 |
| asparagine.lysopcac204    | -0.006931558 | 0.006505595 | 0.288534557 |
| pcaec425.acetylmethionine | -0.04677778  | 0.043907216 | 0.288578955 |
| pcaac384.valine           | -0.0527282   | 0.049497634 | 0.288628924 |
| lysopcac204.lysopcac140   | 0.00318636   | 0.002991323 | 0.288658773 |
| c18.pcaac405              | 0.051599157  | 0.048443557 | 0.28868633  |
| spermidine.methionine     | 0.008426133  | 0.007912021 | 0.28875901  |
| arginine.smc161           | 0.049679112  | 0.046656798 | 0.288849641 |
| smc202.pcaec423           | 0.05448496   | 0.051176982 | 0.288912589 |
| pcaec401.pcaac420         | -0.07541414  | 0.070836991 | 0.288922856 |
| pcaec365.c141             | -0.031725315 | 0.029799812 | 0.288923143 |
| smc202.kynurenine         | -0.003683994 | 0.003460548 | 0.288943493 |
| smc180.pcaec422           | -0.037961854 | 0.035664646 | 0.289014838 |
| citruiline.asparagine     | -0.00540144  | 0.005075603 | 0.289111695 |
| pcaac424.pcaac343         | 0.012653044  | 0.011889864 | 0.289115861 |
| lysopcac280.c14           | 0.034105613  | 0.032050062 | 0.289139249 |
| pcaac405.pcaac384         | 0.045387875  | 0.042653954 | 0.289157425 |
| glutamicacid.pcaec424     | -0.033024567 | 0.031039059 | 0.289214881 |
| smc202.pcaec360           | -0.003983474 | 0.003744214 | 0.289245026 |
| pcaac360.leucine          | 0.013011973  | 0.012230435 | 0.289245139 |
| serine.c16                | 0.02905982   | 0.027315684 | 0.289267685 |
| pcaec365.pcaec424         | -0.011678389 | 0.010977924 | 0.28928772  |
| prolinr.smc181            | -0.008465767 | 0.007958574 | 0.289322778 |
| pcaac422.asparticacid     | 0.031089446  | 0.029233546 | 0.289432857 |
| c4.pcaec340               | 0.039872642  | 0.037504121 | 0.28958268  |
| c3.serotonin              | 0.093616107  | 0.088061853 | 0.289619464 |
| pcaac363.lysopcac140      | -0.003129732 | 0.002944323 | 0.289664987 |

|                            |              |             |             |
|----------------------------|--------------|-------------|-------------|
| pcaec360.pcaec424          | -0.002659068 | 0.002501581 | 0.2896723   |
| asparagine.pcaec361        | 0.005546192  | 0.005217982 | 0.289697369 |
| smc260.lysopcac161         | -0.05003246  | 0.047073249 | 0.28971356  |
| pcaac425.pcaac366          | -0.028288267 | 0.026617999 | 0.289765254 |
| pcaac240.c102              | -0.050368413 | 0.047394743 | 0.2897684   |
| acetylmithoine.lysopcac140 | -0.000360933 | 0.000339632 | 0.289778488 |
| smc260.lysopcac160         | 0.025856168  | 0.024333929 | 0.28985265  |
| pcaec424.pcaac323          | -0.066149046 | 0.062264141 | 0.28992603  |
| pcaec343.pcaac366          | -0.021617682 | 0.020351064 | 0.289996341 |
| pcaac402.pcaec402          | -0.155290041 | 0.146196053 | 0.290011888 |
| c10.pcaec360               | 0.006730276  | 0.006336339 | 0.290026801 |
| c4.pcaac344                | 0.031470141  | 0.02962864  | 0.2900351   |
| smc261.kynurenine          | -0.003410708 | 0.003212108 | 0.290181682 |
| c182.pcaec382              | -0.007159192 | 0.006742353 | 0.29018386  |
| pcaec401.c51dc             | -0.124076735 | 0.116855671 | 0.290197045 |
| pcaac403.kynurenine        | -0.011745737 | 0.011063105 | 0.290238325 |
| pcaec360.smohc221          | -0.040593907 | 0.038244083 | 0.290356289 |
| leucine.pcaac403           | 0.011228913  | 0.010580961 | 0.290449213 |
| ornithine.leucine          | -0.015960741 | 0.015041983 | 0.290520716 |
| h1.pcaec361                | 0.023015225  | 0.021691395 | 0.29054308  |
| smohc161.pcaec445          | 0.02354547   | 0.022200318 | 0.290741753 |
| lysopcac203.lysopcac182    | -0.026990191 | 0.025448606 | 0.290748605 |
| c51dc.pcaec424             | -0.009277532 | 0.008747786 | 0.29075706  |
| c18.pcaac386               | 0.0156997    | 0.014804673 | 0.290803297 |
| pcaac403.c141oh            | 0.082213499  | 0.077530573 | 0.290828069 |
| c51dc.pcaac404             | 0.010725189  | 0.010115003 | 0.290862567 |
| pcaec300.kynurenine        | -0.011295892 | 0.010658467 | 0.291098397 |
| c141.c12                   | 0.070074949  | 0.066122597 | 0.291112688 |
| asparticacid.pcaac281      | 0.003226265  | 0.003044412 | 0.291130724 |
| pcaec444.pcaec362          | 0.014468458  | 0.013652995 | 0.291133234 |
| pcaac403.isoleucine        | -0.017455787 | 0.016472504 | 0.29114927  |
| pcaec443.pcaec301          | 0.104805731  | 0.098906822 | 0.291172544 |
| pcaac421.pcaec340          | -0.047220888 | 0.044565228 | 0.291195528 |
| lysopcac160.serotonin      | -0.09706056  | 0.091603651 | 0.291204386 |
| phenylalanine.pcaec301     | 0.031363175  | 0.029602359 | 0.291244546 |
| lysopcac204.phenylalanine  | -0.048641033 | 0.045913692 | 0.291281209 |
| prolinr.lysopcac181        | 0.044022738  | 0.041554701 | 0.29128529  |
| pcaec446.pcaec405          | -0.032812811 | 0.030974748 | 0.291308777 |
| smohc222.c51dc             | -0.10748442  | 0.101477977 | 0.291377316 |
| arginine.pcaec402          | 0.032610817  | 0.030790373 | 0.291407177 |
| pcaac421.serine            | 0.052523637  | 0.049598096 | 0.29147018  |
| pcaac341.phenylalanine     | -0.038032089 | 0.035914366 | 0.291478828 |
| c141.histidine             | 0.040198262  | 0.037967326 | 0.291572548 |
| citruiline.lysopcac160     | -0.008894574 | 0.00840103  | 0.291577725 |
| smc160.citruiline          | -0.011979239 | 0.011315746 | 0.291629221 |

|                              |              |             |             |
|------------------------------|--------------|-------------|-------------|
| citruLine.pcaec301           | 0.061802946  | 0.05838045  | 0.291634    |
| pcaac364.pcaec422            | 0.022007968  | 0.020789417 | 0.29163854  |
| c12.smc260                   | 0.034569385  | 0.03265626  | 0.291652301 |
| pcaac343.lysopcac160         | -0.021579305 | 0.020386152 | 0.291677753 |
| pcaec384.asparticacid        | 0.039781252  | 0.037589041 | 0.291771809 |
| pcaec443.c141                | -0.035375687 | 0.033429497 | 0.291818461 |
| pcaec444.lysopcac160         | -0.009878875 | 0.009335519 | 0.291825133 |
| pcaac424.c5                  | -0.015260779 | 0.014424137 | 0.291916039 |
| pcaac240.pcaec301            | 0.087606872  | 0.082815339 | 0.291981861 |
| pcaec401.c14                 | 0.056705649  | 0.053607839 | 0.29201436  |
| lysopcac281.c102             | -0.038188424 | 0.036102208 | 0.292014416 |
| pcaac384.c141                | -0.024422697 | 0.02308877  | 0.29202012  |
| pcaec421.lysopcac140         | 0.001673548  | 0.001582349 | 0.292083086 |
| c2.glutamicacid              | -0.058628941 | 0.05543786  | 0.292116648 |
| smc202.pcaac403              | -0.007455253 | 0.007051093 | 0.292226965 |
| pcaac420.pcaac421            | 0.07769111   | 0.073482799 | 0.292249404 |
| methioninesulfoxide.pcaec380 | 0.096747575  | 0.091508525 | 0.292257267 |
| creatinine.pcaac386          | 0.018402755  | 0.017408498 | 0.292320331 |
| pcaec365.pcaec340            | 0.060267431  | 0.057027264 | 0.292454695 |
| pcaac362.pcaac381            | -0.031270377 | 0.029589881 | 0.292466026 |
| smohc161.histidine           | 0.049225952  | 0.046590009 | 0.292564068 |
| pcaac406.pcaec424            | -0.002539851 | 0.002403975 | 0.292589598 |
| lysopcac160.pcaec322         | -0.047217813 | 0.0446932   | 0.292604915 |
| pcaac323.c51dc               | -0.105099213 | 0.099485684 | 0.292633191 |
| pcaec360.pcaac364            | 0.047709976  | 0.045170452 | 0.292726291 |
| pcaec422.pcaac426            | 0.074726168  | 0.07075559  | 0.292773671 |
| lysopcac161.c0               | -0.000717722 | 0.000679692 | 0.292848941 |
| pcaac323.asparagine          | 0.010343032  | 0.009797043 | 0.292949782 |
| pcaac425.lysopcac181         | 0.026845356  | 0.025428892 | 0.292962088 |
| pcaac323.glutamine           | -0.011579311 | 0.010968424 | 0.292965689 |
| pcaec386.lysopcac203         | -0.014227558 | 0.013480392 | 0.293088156 |
| c8.phenylalanine             | -0.044954234 | 0.042614897 | 0.293330237 |
| smc260.c181                  | 0.014392338  | 0.013643447 | 0.293332335 |
| creatinine.c51dc             | 0.109081575  | 0.103442476 | 0.293503667 |
| c142.pcaec404                | 0.022068343  | 0.020929009 | 0.293538449 |
| pcaec443.pcaec343            | 0.065463863  | 0.06209686  | 0.293637074 |
| pcaac426.lysine              | -0.100081498 | 0.094948707 | 0.293711523 |
| pcaec443.pcaac300            | -0.047665759 | 0.045221568 | 0.293715776 |
| pcaac342.kynurenine          | -0.01213375  | 0.011511788 | 0.293725339 |
| c16.pcaac365                 | 0.039355152  | 0.037339795 | 0.29375036  |
| pcaac424.pcaec403            | 0.129312191  | 0.122693759 | 0.293764377 |
| methioninesulfoxide.c18      | 0.061009765  | 0.057893089 | 0.293813502 |
| c51dc.methionine             | -0.034126123 | 0.032383657 | 0.29382631  |
| pcaac323.pcaac361            | -0.035729208 | 0.033907102 | 0.293857688 |
| c141oh.c51dc                 | 0.100245184  | 0.095168438 | 0.294037205 |

|                                  |              |             |             |
|----------------------------------|--------------|-------------|-------------|
| serotonin.pcaac425               | 0.075642334  | 0.071815046 | 0.29406056  |
| pcaec423.pcaec421                | -0.00645906  | 0.006132576 | 0.294086145 |
| pcaec443.c162                    | 0.055617767  | 0.052814169 | 0.294156209 |
| lysopcac180.pcaec424             | -0.003311264 | 0.003144914 | 0.294242642 |
| pcaac361.lysopcac181             | 0.023698978  | 0.022511015 | 0.294298555 |
| pcaac366.pcaac420                | -0.07221842  | 0.068601589 | 0.294321501 |
| c3.c101                          | 0.015614362  | 0.014832406 | 0.294322805 |
| pcaec361.pcaac420                | 0.113552258  | 0.107870894 | 0.294346206 |
| smc160.pcaec445                  | 0.037918303  | 0.036026468 | 0.294417401 |
| c3.pcaec343                      | -0.080091669 | 0.07609996  | 0.29444429  |
| serotonin.smc161                 | -0.055647641 | 0.052884477 | 0.294537723 |
| putrescine.leucine               | 0.006348199  | 0.006033034 | 0.294541948 |
| lysopcac204.pcaec402             | -0.025343604 | 0.024085748 | 0.294549129 |
| pcaec384.pcaec444                | -0.075253432 | 0.071519851 | 0.294558568 |
| c10.pcaec383                     | 0.042221351  | 0.040131614 | 0.294618596 |
| pcaac342.smc240                  | 0.045476517  | 0.043227824 | 0.294642605 |
| smc160.pcaac421                  | -0.026294599 | 0.024996695 | 0.294686747 |
| smohc221.pcaac365                | 0.048265481  | 0.045894392 | 0.294805169 |
| phenylalanine.c141               | -0.020655987 | 0.019642509 | 0.294836194 |
| c0.pcaec340                      | 0.038846716  | 0.036944921 | 0.294890932 |
| serine.prolinr                   | -0.035587641 | 0.033846384 | 0.294904939 |
| leucine.pcaec382                 | -0.021982737 | 0.020908252 | 0.294930292 |
| c51.pcaac300                     | 0.051132235  | 0.048633627 | 0.294936837 |
| lysopcac182.pcaac381             | -0.017450196 | 0.01660002  | 0.295010382 |
| c101.pcaec445                    | -0.030505201 | 0.029021736 | 0.295056012 |
| smc181.pcaac343                  | 0.017328485  | 0.01648918  | 0.295154524 |
| pcaec425.phenylalanine           | -0.044066961 | 0.041938318 | 0.295220377 |
| c14.pcaec383                     | 0.055770261  | 0.053081094 | 0.295263876 |
| pcaec360.pcaac323                | -0.061449936 | 0.058488715 | 0.295278779 |
| glycine.c141oh                   | 0.076545136  | 0.072859141 | 0.295296277 |
| pcaec402.prolinr                 | -0.031319088 | 0.029812509 | 0.295321732 |
| pcaac404.arginine                | 0.026101817  | 0.024849198 | 0.295379551 |
| pcaec360.smc240                  | 0.041115301  | 0.039144793 | 0.295411548 |
| c142.pcaec402                    | -0.0369719   | 0.035200338 | 0.295416571 |
| pcaec383.pcaec421                | 0.01210384   | 0.011525089 | 0.295467555 |
| pcaec421.pcaac323                | -0.139427037 | 0.132782885 | 0.295549515 |
| lysopcac180.lysine               | 0.06616337   | 0.063010557 | 0.295550176 |
| lysopcac160.smohc241             | 0.074633161  | 0.071089344 | 0.295635426 |
| smc241.pcaac421                  | -0.011968541 | 0.011402259 | 0.295720752 |
| pcaac341.pcaec404                | -0.031747178 | 0.03024797  | 0.295766596 |
| asparagine.pcaec424              | -0.009799307 | 0.009336906 | 0.295784909 |
| pcaac343.c2                      | 0.074218706  | 0.070725732 | 0.295847423 |
| alphaaminoadipicacid.lysopcac204 | 0.023384063  | 0.02228518  | 0.295882975 |
| lysopcac281.pcaec446             | -0.032085289 | 0.030578487 | 0.295898337 |
| pcaec364.pcaac365                | 0.028923098  | 0.027565085 | 0.295903321 |

|                               |              |             |             |
|-------------------------------|--------------|-------------|-------------|
| pcaec443.pcaec322             | 0.053285667  | 0.050783912 | 0.295904664 |
| pcaac425.pcaec340             | -0.046864176 | 0.044674919 | 0.296023226 |
| smc181.c16                    | 0.036807312  | 0.035092277 | 0.296083755 |
| methionine.glutamine          | 0.01243382   | 0.011855531 | 0.296126916 |
| acetylmethionine.smc240       | -0.010084253 | 0.009615539 | 0.296141839 |
| pcaec386.c102                 | 0.023173885  | 0.022097424 | 0.296156156 |
| lysopcac161.pcaec446          | -0.040776725 | 0.038885642 | 0.296193971 |
| pcaac360.smc161               | 0.101062704  | 0.096388743 | 0.296258733 |
| serotonin.smohc221            | -0.030868987 | 0.029443576 | 0.296295033 |
| lysopcac203.leucine           | -0.012938572 | 0.012344735 | 0.29643599  |
| h1.c142                       | 0.037594695  | 0.035870813 | 0.296457295 |
| smc180.kynurenine             | -0.003842319 | 0.003666208 | 0.296467313 |
| pcaec365.tyrosine             | -0.050673878 | 0.048352574 | 0.296480343 |
| arginine.c162                 | -0.074455271 | 0.071048382 | 0.296506141 |
| pcaac421.pcaac362             | -0.010755678 | 0.010263642 | 0.296511653 |
| pcaac426.valine               | -0.05182549  | 0.049462923 | 0.296592123 |
| pcaec425.c162                 | 0.057484145  | 0.054864561 | 0.296600396 |
| pcaac300.pcaec383             | -0.078327405 | 0.074760617 | 0.296617351 |
| smohc222.pcaec340             | 0.061711434  | 0.058923216 | 0.296796449 |
| c2.lysine                     | 0.053213735  | 0.050813259 | 0.296832457 |
| lysopcac281.histidine         | 0.063715452  | 0.060842909 | 0.29684564  |
| pcaac362.lysopcac180          | 0.054892936  | 0.05241973  | 0.29686017  |
| pcaac366.pcaec406             | -0.03991165  | 0.038114983 | 0.296879806 |
| pcaac426.lysopcac140          | 0.001486659  | 0.001419746 | 0.296883278 |
| pcaac365.pcaec362             | -0.045890421 | 0.043826205 | 0.296897278 |
| creatinine.pcaac344           | 0.036443712  | 0.0348168   | 0.297068379 |
| alphaaminoadipicacid.pcaec445 | 0.029885635  | 0.028554606 | 0.297120926 |
| pcaec301.lysopcac280          | -0.008904671 | 0.008508139 | 0.297124293 |
| pcaac365.c18                  | -0.052846468 | 0.050496724 | 0.297158099 |
| pcaec340.lysopcac204          | -0.042047963 | 0.040181229 | 0.297192465 |
| pcaac406.c14                  | -0.049961435 | 0.04774417  | 0.297200431 |
| pcaac386.smc181               | 0.019605042  | 0.018735037 | 0.297201882 |
| pcaec301.lysopcac140          | 0.00134297   | 0.001283652 | 0.297306148 |
| c142.lysine                   | 0.053178058  | 0.050832847 | 0.297340604 |
| smohc141.lysopcac181          | 0.041214509  | 0.039397621 | 0.297349357 |
| c142.pcaec424                 | 0.009126112  | 0.008724088 | 0.297365304 |
| prolinr.valine                | 0.057226013  | 0.054713984 | 0.297443524 |
| pcaac405.pcaec420             | -0.043308349 | 0.041412779 | 0.297507662 |
| smc161.smc180                 | -0.012721832 | 0.012165337 | 0.297520656 |
| pcaec444.asparticacid         | 0.022205574  | 0.02123609  | 0.297562863 |
| c14.smc160                    | 0.062236943  | 0.059520522 | 0.297569421 |
| pcaac381.c16                  | 0.020555837  | 0.019662869 | 0.297672731 |
| smc180.pcaac402               | -0.060853242 | 0.058225423 | 0.297802605 |
| alanine.pcaac323              | 0.089996105  | 0.086113958 | 0.297825767 |
| c141oh.pcaac322               | -0.050936763 | 0.048742134 | 0.297851656 |

|                               |              |             |             |
|-------------------------------|--------------|-------------|-------------|
| lysopcac204.smc180            | 0.010843658  | 0.010376461 | 0.297851934 |
| lysopcac280.pcaac421          | 0.014153145  | 0.013544578 | 0.297895234 |
| methioninesulfoxide.citruline | 0.010806004  | 0.010341705 | 0.297911323 |
| pcaac386.methioninesulfoxide  | 0.022432741  | 0.021473918 | 0.298024242 |
| lysopcac182.pcaac421          | -0.00853782  | 0.008173529 | 0.298061567 |
| pcaac366.pcaac401             | -0.049323862 | 0.04722335  | 0.298102662 |
| glutamine.pcaac365            | -0.048474728 | 0.046412373 | 0.298123363 |
| smc261.lysopcac280            | 0.008798402  | 0.008424614 | 0.298154206 |
| pcaac402.pcaec424             | -0.020839195 | 0.019956261 | 0.298211819 |
| smc202.c18                    | -0.022207404 | 0.021267444 | 0.29823319  |
| glutamine.pcaac425            | -0.065945145 | 0.063158551 | 0.298268451 |
| pcaec443.pcaec402             | -0.084169118 | 0.080626615 | 0.298353025 |
| asparticacid.c141oh           | 0.083828755  | 0.08032142  | 0.298477929 |
| pcaac381.pcaac405             | -0.028046494 | 0.026875364 | 0.298519382 |
| pcaec445.asparticacid         | 0.020037688  | 0.019204505 | 0.298607761 |
| pcaac380.pcaec405             | -0.064584276 | 0.06193958  | 0.298924661 |
| pcaec321.pcaac380             | -0.085907255 | 0.082390065 | 0.298928585 |
| pcaac402.leucine              | -0.013066536 | 0.012534555 | 0.299043244 |
| smc160.alanine                | -0.015792375 | 0.01514942  | 0.299043339 |
| pcaec420.c18                  | -0.019977585 | 0.019166139 | 0.299091111 |
| prolinr.smohc222              | -0.004574087 | 0.004388992 | 0.299167238 |
| c142.asparagine               | -0.006569171 | 0.006304009 | 0.299218144 |
| pcaac343.putrescine           | 0.03729894   | 0.03579352  | 0.299219975 |
| c181.pcaec322                 | 0.054787005  | 0.052577179 | 0.299233052 |
| smc161.alphaaminoadipicacid   | 0.017811371  | 0.017097591 | 0.299363698 |
| pcaac343.pcaac361             | -0.045676291 | 0.043851967 | 0.299430931 |
| lysopcac161.lysopcac182       | -0.021889781 | 0.021017788 | 0.299483417 |
| pcaac405.leucine              | 0.029659647  | 0.028488914 | 0.299665539 |
| pcaac386.pcaac406             | -0.072095531 | 0.069251959 | 0.299680839 |
| pcaac425.pcaac421             | -0.02305336  | 0.022144378 | 0.299686961 |
| pcaec382.pcaac343             | 0.015424966  | 0.014817721 | 0.299717958 |
| lysopcac280.creatinine        | 0.006492774  | 0.006237305 | 0.299728465 |
| pcaac385.leucine              | 0.006778194  | 0.006512969 | 0.299837503 |
| pcaac364.pcaac421             | 0.026993469  | 0.025938495 | 0.2998608   |
| pcaac405.glutamicacid         | -0.038772147 | 0.037260255 | 0.299905033 |
| pcaec405.pcaec402             | -0.127829072 | 0.122859608 | 0.299964353 |
| pcaac361.c101                 | -0.013614598 | 0.013091701 | 0.30019909  |
| pcaec445.c14                  | -0.036576467 | 0.035172904 | 0.300215975 |
| pcaac386.pcaec424             | -0.002907669 | 0.002796168 | 0.300229104 |
| c4.pcaec382                   | -0.014345297 | 0.013797577 | 0.300312182 |
| phenylalanine.pcaac344        | 0.07627948   | 0.073367942 | 0.30031811  |
| c18.phenylalanine             | -0.042210441 | 0.040599909 | 0.300325371 |
| pcaac342.ornithine            | 0.054080736  | 0.05202219  | 0.300370681 |
| pcaec423.pcaec342             | -0.093580148 | 0.090022631 | 0.300394997 |
| lysopcac204.alanine           | -0.020722845 | 0.019936813 | 0.300437552 |

|                           |              |             |             |
|---------------------------|--------------|-------------|-------------|
| pcaac401.acetylmethionine | -0.034113964 | 0.032821516 | 0.300459834 |
| glutamine.c14             | 0.045522952  | 0.043800373 | 0.300483035 |
| pcaec445.c51dc            | -0.099935526 | 0.096157142 | 0.300498841 |
| pcaec403.pcaec342         | 0.070900316  | 0.068220074 | 0.300501464 |
| asparagine.pcaec383       | -0.020009606 | 0.019254092 | 0.300524194 |
| pcaac363.pcaec446         | -0.037130336 | 0.035729258 | 0.300535955 |
| pcaec446.pcaac281         | 0.001700559  | 0.001636461 | 0.300556982 |
| pcaac406.lysopcac280      | 0.00387514   | 0.003729409 | 0.30059968  |
| c51dc.pcaec404            | -0.010844681 | 0.01043893  | 0.300695696 |
| pcaec422.acetylmethionine | -0.070601163 | 0.067962984 | 0.300719383 |
| citruline.lysopcac140     | 0.002089894  | 0.002011994 | 0.300765715 |
| histidine.smc202          | -0.042162846 | 0.040600054 | 0.300870277 |
| pcaac341.smc261           | 0.042323173  | 0.040762512 | 0.300965653 |
| pcaac323.smohc222         | -0.007086558 | 0.006825445 | 0.300979959 |
| citruline.lysopcac281     | 0.031107073  | 0.029961664 | 0.300992339 |
| smohc241.citruline        | -0.007153026 | 0.006890277 | 0.301036769 |
| pcaec420.pcaec341         | -0.048807029 | 0.047026236 | 0.30115981  |
| pcaac406.pcaec365         | -0.02013671  | 0.019404221 | 0.301215072 |
| pcaec421.lysopcac280      | 0.011880719  | 0.011449792 | 0.301267359 |
| isoleucine.pcaac404       | -0.016598051 | 0.015996225 | 0.301273532 |
| c142.pcaac343             | 0.021797106  | 0.021008442 | 0.301311895 |
| pcaec404.c181             | 0.017694656  | 0.017054658 | 0.301318424 |
| c142.pcaac381             | -0.012830792 | 0.012366825 | 0.301322661 |
| pcaac322.pcaac420         | 0.066482269  | 0.064080177 | 0.301337235 |
| arginine.smc261           | 0.027371252  | 0.026396171 | 0.30159048  |
| smc260.spermidine         | 0.05334458   | 0.051444689 | 0.301594877 |
| pcaac341.arginine         | 0.040576536  | 0.039140255 | 0.301704027 |
| smohc161.pcaac365         | 0.052308311  | 0.05047635  | 0.301890936 |
| smohc141.pcaec425         | -0.013457525 | 0.012986437 | 0.301899333 |
| pcaec301.lysopcac160      | 0.014433323  | 0.013928745 | 0.301922407 |
| lysopcac161.c5            | -0.018203883 | 0.017567553 | 0.301924203 |
| smohc222.pcaac322         | 0.043811474  | 0.042280593 | 0.301930809 |
| isoleucine.pcaac381       | 0.019825764  | 0.019134956 | 0.301979969 |
| pcaac383.phenylalanine    | 0.047951449  | 0.046285935 | 0.302035149 |
| asparagine.c101           | -0.019983791 | 0.01929299  | 0.302117593 |
| smc260.lysopcac180        | 0.048351014  | 0.046711038 | 0.302441693 |
| c141oh.lysopcac140        | -0.001892749 | 0.00182861  | 0.302457349 |
| c10.pcaac381              | -0.016642043 | 0.016079093 | 0.30248713  |
| pcaac425.pcaac384         | 0.050305205  | 0.048612029 | 0.302571321 |
| smohc221.pcaac320         | 0.104669044  | 0.101163832 | 0.302655813 |
| smc180.pcaec322           | 0.066507922  | 0.064281299 | 0.302660532 |
| pcaec443.pcaec361         | 0.018369205  | 0.017754425 | 0.302666045 |
| pcaec300.phenylalanine    | -0.02657655  | 0.025690946 | 0.302738416 |
| c102.c3                   | 0.034119796  | 0.032985047 | 0.302770772 |
| pcaac426.glycine          | -0.043864779 | 0.042420768 | 0.302939238 |

|                                    |              |             |             |
|------------------------------------|--------------|-------------|-------------|
| smc240.lysopcac170                 | -0.011433212 | 0.011057072 | 0.302949539 |
| c141.pcaec362                      | 0.015771939  | 0.015255293 | 0.303020068 |
| pcaec380.lysopcac204               | -0.084071434 | 0.08133024  | 0.303095618 |
| asymmetricdimethylarginine.pcaec36 | -0.005361768 | 0.005187317 | 0.303130206 |
| alanine.lysopcac161                | 0.041459232  | 0.040113441 | 0.303167779 |
| smohc241.c5                        | -0.006123001 | 0.005924796 | 0.303212608 |
| smc202.pcaec401                    | -0.021592718 | 0.020896214 | 0.303269415 |
| pcaac300.glutamine                 | -0.010370148 | 0.010036638 | 0.303317109 |
| c141.asparagine                    | -0.00643325  | 0.006226576 | 0.303334341 |
| prolinr.lysopcac281                | -0.015538093 | 0.015039508 | 0.303353281 |
| c16.c12                            | -0.026402083 | 0.025559964 | 0.303448799 |
| pcaac240.c4                        | -0.012562371 | 0.01216187  | 0.303456205 |
| pcaec340.pcaec424                  | -0.003663341 | 0.003547293 | 0.303557057 |
| pcaac403.c4                        | -0.020816612 | 0.020158331 | 0.303584617 |
| c162.pcaac422                      | 0.056946078  | 0.055164474 | 0.303752263 |
| c51.c182                           | -0.031530379 | 0.030546796 | 0.303797534 |
| pcaac426.pcaac404                  | 0.008427204  | 0.008164631 | 0.303815944 |
| c162.pcaec444                      | -0.085508386 | 0.082850651 | 0.303853812 |
| pcaec424.pcaec421                  | -0.004122754 | 0.003995438 | 0.30395341  |
| asparagine.pcaec342                | -0.050181652 | 0.048633296 | 0.303966426 |
| pcaac343.pcaac381                  | 0.017764136  | 0.017217107 | 0.303996757 |
| pcaec300.pcaec424                  | -0.005243265 | 0.005082276 | 0.304041577 |
| pcaec383.leucine                   | -0.011478311 | 0.011126643 | 0.30407447  |
| pcaac404.lysopcac140               | 0.002177689  | 0.002111025 | 0.304087153 |
| lysopcac140.pcaac344               | 0.057228     | 0.055486624 | 0.304178261 |
| pcaac364.leucine                   | 0.004416014  | 0.004281744 | 0.304189948 |
| pcaac386.pcaac402                  | 0.065489386  | 0.063504077 | 0.304234777 |
| pcaec361.pcaac343                  | 0.01900225   | 0.018428509 | 0.304295215 |
| pcaec361.pcaec444                  | 0.177311826  | 0.171974248 | 0.304340184 |
| c18.pcaec403                       | 0.032410771  | 0.031435925 | 0.304352563 |
| pcaac362.pcaec401                  | 0.047646683  | 0.046217655 | 0.304395103 |
| serine.pcaec343                    | 0.053729766  | 0.05213845  | 0.304581384 |
| c4.pcaac384                        | -0.036768692 | 0.035684961 | 0.304652246 |
| pcaec381.pcaac364                  | 0.049870361  | 0.048401144 | 0.304658976 |
| pcaac406.lysopcac140               | 0.001347857  | 0.001308237 | 0.304692013 |
| glycine.prolinr                    | -0.037798434 | 0.036687648 | 0.304695522 |
| pcaec301.c8                        | -0.049689808 | 0.04823101  | 0.30470992  |
| serine.pcaec424                    | 0.005495168  | 0.005334085 | 0.304732027 |
| lysopcac181.c51                    | -0.049831716 | 0.048372949 | 0.304751714 |
| pcaac404.prolinr                   | 0.046209351  | 0.044857157 | 0.304757435 |
| pcaac366.pcaac362                  | -0.058287978 | 0.056583873 | 0.304770533 |
| pcaec386.alanine                   | -0.013063722 | 0.012682033 | 0.304779686 |
| histidine.pcaac381                 | 0.018711176  | 0.01816473  | 0.304786249 |
| smohc221.kynurenine                | -0.003526618 | 0.00342364  | 0.304788233 |
| c182.pcaac365                      | 0.026144057  | 0.025383274 | 0.304838173 |



|                               |              |             |             |
|-------------------------------|--------------|-------------|-------------|
| pcaac403.pcaec402             | -0.107210925 | 0.104096172 | 0.30486153  |
| pcaac401.pcaec380             | 0.075638053  | 0.07344247  | 0.304873973 |
| pcaec341.c8                   | 0.034428961  | 0.033431115 | 0.304896176 |
| citruLine.gluTamine           | -0.02083907  | 0.02024626  | 0.305161869 |
| ornithine.smc161              | 0.028236965  | 0.027452695 | 0.305495251 |
| c18.pcaec424                  | -0.004124279 | 0.004010057 | 0.305534621 |
| alphaaminoadipicacid.arginine | -0.043653097 | 0.042448951 | 0.305589454 |
| lysopcac181.citruLine         | 0.024753057  | 0.024071674 | 0.305617811 |
| lysopcac182.pcaec403          | 0.039280952  | 0.038203256 | 0.305663194 |
| lysopcac170.lysopcac140       | -0.001558866 | 0.001516293 | 0.305725285 |
| smc160.pcaac386               | -0.010808173 | 0.010513283 | 0.305738294 |
| h1.lysopcac160                | 0.040685722  | 0.03957577  | 0.30573972  |
| pcaec403.pcaac300             | -0.054013992 | 0.052545061 | 0.305782185 |
| creatinine.pcaec424           | -0.003837916 | 0.003733735 | 0.305807044 |
| pcaec404.pcaec300             | -0.037602958 | 0.03658248  | 0.305810485 |
| c162.lysopcac140              | -0.001111188 | 0.001081198 | 0.305884362 |
| pcaac320.gluTamine            | -0.007756701 | 0.007548003 | 0.305925708 |
| pcaac421.isoleucine           | -0.018658947 | 0.018157619 | 0.30594432  |
| pcaec360.pcaac421             | 0.015423387  | 0.015011107 | 0.306012234 |
| lysopcac203.pcaac320          | -0.042838128 | 0.041694517 | 0.306029404 |
| pcaec300.pcaac240             | -0.01694991  | 0.016498362 | 0.306057118 |
| lysopcac281.smc160            | 0.094302343  | 0.091795076 | 0.306083154 |
| pcaec380.smc161               | 0.074009846  | 0.072062297 | 0.306218164 |
| lysopcac161.pcaec384          | -0.038622023 | 0.037606693 | 0.306230965 |
| c102.c141                     | -0.044905005 | 0.043728739 | 0.30627764  |
| pcaec445.pcaec405             | -0.030166686 | 0.029379857 | 0.306332985 |
| pcaec363.c3                   | -0.036119698 | 0.035179827 | 0.306363492 |
| smohc222.lysopcac160          | -0.025663877 | 0.024998419 | 0.306408637 |
| smohc141.pcaac344             | -0.067620666 | 0.065870743 | 0.306433981 |
| pcaac240.pcaec364             | 0.006452688  | 0.006287714 | 0.306588193 |
| smc261.pcaac240               | -0.008731814 | 0.008510079 | 0.306673628 |
| lysopcac280.gluTamicacid      | -0.029499861 | 0.028751472 | 0.306685834 |
| lysopcac280.lysopcac160       | -0.017787017 | 0.017336153 | 0.306696372 |
| c102.leucine                  | 0.008759421  | 0.008538032 | 0.306732748 |
| pcaec420.citruLine            | 0.009110094  | 0.008880217 | 0.306753064 |
| pcaac381.acetylorNithoine     | -0.03115394  | 0.030369837 | 0.306784998 |
| pcaec342.pcaac403             | -0.003772927 | 0.00367898  | 0.306917605 |
| citruLine.valine              | 0.070226614  | 0.068489928 | 0.307001904 |
| c181.lysopcac280              | 0.020426971  | 0.019922108 | 0.307008949 |
| serine.c3                     | -0.0257829   | 0.025147193 | 0.307038271 |
| asparagine.smc241             | 0.016766704  | 0.016354012 | 0.307059206 |
| pcaac300.c14                  | 0.034282865  | 0.033443056 | 0.307117149 |
| pcaec321.serotonin            | 0.080106145  | 0.078155828 | 0.307191145 |
| c182.pcaec405                 | -0.037585396 | 0.036672381 | 0.307218263 |
| asparticacid.pcaec385         | -0.058277477 | 0.056874496 | 0.307325728 |

|                         |              |             |             |
|-------------------------|--------------|-------------|-------------|
| pcaac385.pcaec322       | -0.054133711 | 0.052834685 | 0.307364009 |
| pcaec365.pcaac385       | -0.015663034 | 0.015287833 | 0.307384787 |
| c12.pcaec362            | 0.013556043  | 0.013233207 | 0.30745371  |
| pcaec363.pcaac385       | -0.020311305 | 0.019829024 | 0.307488495 |
| pcaec365.glycine        | 0.026903485  | 0.02626652  | 0.307522315 |
| pcaec401.smohc221       | -0.068888821 | 0.067259051 | 0.307531185 |
| pcaac344.c14            | 0.047608874  | 0.046501722 | 0.307729974 |
| pcaac385.pcaec446       | -0.040597479 | 0.039656241 | 0.307764756 |
| acetylmithoine.c4       | -0.015600401 | 0.01523893  | 0.307771686 |
| c141.pcaac281           | 0.001903817  | 0.001859742 | 0.307781649 |
| smohc241.pcaec322       | 0.066982838  | 0.06543594  | 0.307809505 |
| asparticacid.pcaec364   | 0.006380675  | 0.006233519 | 0.307824921 |
| pcaac300.pcaec403       | 0.066889843  | 0.065348758 | 0.307836538 |
| smc261.pcaac323         | -0.056151094 | 0.054859423 | 0.307854118 |
| h1.pcaac402             | 0.03099348   | 0.030280997 | 0.307861683 |
| lysopcac281.pcaec360    | -0.006782078 | 0.006626264 | 0.307868474 |
| lysopcac182.pcaac343    | 0.017649706  | 0.017246284 | 0.307926292 |
| pcaec401.pcaec383       | -0.126355616 | 0.123480295 | 0.307976293 |
| pcaac240.c16            | 0.011156709  | 0.010904587 | 0.308053987 |
| pcaec424.pcaac343       | 0.01183163   | 0.011567558 | 0.308191575 |
| pcaec381.pcaac405       | -0.047416697 | 0.046360237 | 0.308210698 |
| pcaac344.pcaac361       | -0.053755704 | 0.052560735 | 0.308235704 |
| pcaec421.pcaac384       | 0.037402279  | 0.03657102  | 0.308238073 |
| h1.smohc161             | 0.016776181  | 0.016403696 | 0.308248735 |
| pcaec401.histidine      | 0.071977932  | 0.070380321 | 0.308252348 |
| c12.lysopcac170         | -0.017342296 | 0.016957397 | 0.308253164 |
| pcaac344.pcaec404       | -0.020909516 | 0.020447433 | 0.308299985 |
| pcaac421.pcaec422       | -0.030942437 | 0.030260075 | 0.308322918 |
| lysopcac181.serine      | -0.031451845 | 0.030760324 | 0.30835544  |
| lysopcac203.prolinr     | -0.019922442 | 0.019487393 | 0.308429115 |
| c141oh.smc261           | 0.063776848  | 0.062390711 | 0.308479845 |
| pcaec380.pcaac385       | -0.043709888 | 0.042761961 | 0.308503188 |
| pcaec382.pcaac405       | -0.045104805 | 0.04413031  | 0.308543415 |
| asparticacid.smc240     | 0.058963792  | 0.057704657 | 0.308666919 |
| lysopcac161.lysopcac280 | 0.00784582   | 0.007679057 | 0.308715846 |
| pcaac381.lysopcac203    | -0.053274964 | 0.052146472 | 0.308751602 |
| c182.c14                | -0.020737922 | 0.020302908 | 0.308852855 |
| pcaec300.glutamine      | -0.007736272 | 0.007574236 | 0.308868523 |
| pcaec425.pcaac406       | 0.031228636  | 0.030576022 | 0.308891654 |
| c18.pcaac403            | -0.003804592 | 0.003725503 | 0.308945809 |
| c141.pcaac404           | 0.00307594   | 0.003012047 | 0.308953687 |
| c18.pcaec422            | -0.019264541 | 0.018865729 | 0.308988149 |
| smc241.c51              | -0.049984545 | 0.048951427 | 0.309004461 |
| lysopcac180.smc160      | -0.047863977 | 0.0468802   | 0.309061116 |
| pcaac404.pcaac240       | -0.011596608 | 0.011360614 | 0.309161194 |

|                                    |              |             |             |
|------------------------------------|--------------|-------------|-------------|
| putrescine.lysopcac140             | -0.001302685 | 0.001276278 | 0.309200106 |
| c18.pcaec341                       | 0.039491095  | 0.038692555 | 0.309224884 |
| c181.glutamicacid                  | -0.05352647  | 0.052446542 | 0.309247108 |
| pcaac361.pcaec340                  | 0.060404433  | 0.059201221 | 0.309373175 |
| c51.c141oh                         | -0.079047273 | 0.077486574 | 0.309459417 |
| pcaec301.smc160                    | 0.045658244  | 0.044783194 | 0.309743861 |
| lysopcac160.c16                    | 0.026580753  | 0.02607379  | 0.309789398 |
| pcaec321.glutamine                 | -0.012503638 | 0.012265481 | 0.309801921 |
| lysopcac140.pcaac384               | -0.077223164 | 0.075754426 | 0.309815514 |
| pcaac343.pcaac380                  | -0.040029925 | 0.039275804 | 0.309904181 |
| c162.pcaac380                      | 0.030485876  | 0.029922055 | 0.310073358 |
| pcaec362.smc260                    | 0.042633364  | 0.041850606 | 0.31013929  |
| pcaec362.c18                       | -0.02586941  | 0.02540112  | 0.310266018 |
| pcaec386.pcaac385                  | -0.023085274 | 0.022667594 | 0.310270544 |
| pcaec322.smc261                    | 0.03864936   | 0.03795975  | 0.310393334 |
| pcaac406.c3                        | 0.025969209  | 0.025510676 | 0.310484581 |
| c51dc.tyrosine                     | 0.043070147  | 0.042316263 | 0.310559721 |
| c181.lysopcac180                   | 0.025298376  | 0.024855864 | 0.310565561 |
| asparagine.histidine               | 0.060397755  | 0.05934902  | 0.310628324 |
| pcaec300.pcaac426                  | 0.06459283   | 0.063480859 | 0.310701273 |
| acetylmethionine.pcaac343          | -0.016200176 | 0.015922294 | 0.310731732 |
| asymmetricdimethylarginine.lysopca | -0.0183033   | 0.017990684 | 0.310767642 |
| pcaec403.c5                        | -0.026831286 | 0.026373976 | 0.310785234 |
| smc180.pcaac344                    | -0.059910279 | 0.058897595 | 0.310854146 |
| asymmetricdimethylarginine.smc161  | 0.058493525  | 0.057506955 | 0.310872304 |
| lysopcac170.citruline              | 0.026119332  | 0.025680256 | 0.310899718 |
| pcaec444.pcaac360                  | -0.03342741  | 0.032867234 | 0.31092542  |
| pcaec341.lysopcac280               | 0.00947918   | 0.009323564 | 0.311092717 |
| pcaec420.pcaac421                  | -0.00858965  | 0.008449443 | 0.311138741 |
| pcaec360.c141oh                    | 0.090116267  | 0.088661606 | 0.311227298 |
| pcaac364.pcaec401                  | 0.0303024    | 0.02982427  | 0.311405326 |
| c181.lysopcac140                   | -0.000847787 | 0.000834451 | 0.311429176 |
| c102.pcaec403                      | 0.054003622  | 0.053157619 | 0.311460641 |
| kynurenine.pcaec405                | -0.054347699 | 0.053500753 | 0.311500721 |
| pcaac383.pcaec342                  | 0.084232964  | 0.082924967 | 0.311527907 |
| prolinr.pcaec382                   | -0.013193567 | 0.012989014 | 0.311539799 |
| c51.pcaac321                       | 0.009122378  | 0.00898164  | 0.311577131 |
| lysopcac204.pcaac343               | 0.02315209   | 0.022798045 | 0.311643547 |
| c2.pcaac365                        | 0.044522173  | 0.043845352 | 0.311687731 |
| pcaac381.pcaec340                  | -0.037913117 | 0.037337564 | 0.31169802  |
| c102.lysopcac181                   | -0.070263914 | 0.069198358 | 0.311705763 |
| c16.tyrosine                       | -0.070132286 | 0.06908628  | 0.311828266 |
| pcaec420.pcaec424                  | -0.00438376  | 0.004318894 | 0.311885838 |
| pcaac426.leucine                   | 0.010474175  | 0.010319852 | 0.311916897 |
| pcaec322.pcaec343                  | 0.080614568  | 0.079434068 | 0.311960863 |

|                              |              |             |             |
|------------------------------|--------------|-------------|-------------|
| pcaec360.pcaec401            | 0.066528739  | 0.065561589 | 0.312012929 |
| pcaec443.pcaec382            | 0.01826691   | 0.01800206  | 0.31203171  |
| pcaec445.lysopcac280         | 0.006475142  | 0.006383471 | 0.312198763 |
| pcaec361.pcaac366            | -0.027813679 | 0.027420434 | 0.312207977 |
| c4.c101                      | 0.035026038  | 0.034532567 | 0.312232355 |
| pcaac240.smc261              | -0.064241262 | 0.063346894 | 0.312313839 |
| c141oh.smc260                | 0.025962195  | 0.025600868 | 0.312316091 |
| c162.c51dc                   | 0.085033473  | 0.083850126 | 0.312316662 |
| smc181.pcaac421              | -0.036031389 | 0.035532701 | 0.31235375  |
| lysopcac140.serine           | -0.056930504 | 0.056144098 | 0.312366919 |
| pcaec301.pcaac364            | 0.051043167  | 0.050340527 | 0.312390308 |
| lysopcac203.lysopcac204      | -0.03314822  | 0.032692978 | 0.312405979 |
| glycine.pcaec361             | 0.006198481  | 0.006114095 | 0.312464419 |
| pcaec422.c2                  | 0.053711908  | 0.052991766 | 0.312565326 |
| pcaec445.pcaac404            | 0.004656319  | 0.004594127 | 0.312590263 |
| pcaac240.methionine          | -0.041425165 | 0.040872433 | 0.312596883 |
| pcaec424.pcaec300            | 0.011666039  | 0.01151087  | 0.312617398 |
| pcaec405.pcaec340            | -0.038994367 | 0.038479555 | 0.312665614 |
| pcaac365.pcaac364            | -0.052492544 | 0.051802371 | 0.312692091 |
| glutamicacid.prolinr         | -0.049188112 | 0.048542588 | 0.312704043 |
| pcaac384.c102                | 0.021744695  | 0.02145949  | 0.312707714 |
| phenylalanine.pcaac323       | 0.082307011  | 0.081255095 | 0.312871654 |
| pcaec384.pcaac403            | -0.002937364 | 0.002900453 | 0.312976462 |
| pcaec380.c16                 | 0.018599481  | 0.018368839 | 0.313057156 |
| lysopcac161.pcaac300         | -0.036235469 | 0.035787069 | 0.313069776 |
| c2.pcaec342                  | -0.047133389 | 0.046556754 | 0.313138353 |
| pcaac320.pcaec446            | -0.036690747 | 0.03624358  | 0.313161128 |
| pcaec380.c51                 | -0.128837599 | 0.1272718   | 0.31317781  |
| pcaac321.leucine             | 0.007315399  | 0.007227426 | 0.31324002  |
| pcaac403.leucine             | -0.013391312 | 0.01323072  | 0.31325639  |
| pcaec406.pcaac421            | -0.0246346   | 0.024340444 | 0.313281517 |
| pcaac406.methioninesulfoxide | 0.029890766  | 0.029544268 | 0.313451586 |
| smc202.c181                  | -0.011794883 | 0.011660135 | 0.313533448 |
| pcaac380.pcaac405            | -0.030834684 | 0.030490092 | 0.31365479  |
| pcaec362.pcaec424            | -0.006890622 | 0.006816907 | 0.313887607 |
| pcaec363.kynurenine          | -0.005663249 | 0.005603235 | 0.313936685 |
| pcaac361.asparticacid        | 0.019038982  | 0.018840488 | 0.314020241 |
| pcaac240.lysopcac203         | 0.025441359  | 0.025178788 | 0.314071393 |
| pcaec360.smc180              | -0.03210246  | 0.031772033 | 0.314084925 |
| pcaec405.leucine             | -0.042713222 | 0.042282877 | 0.314190952 |
| putrescine.pcaec446          | -0.063562357 | 0.06292822  | 0.314238965 |
| methioninesulfoxide.pcaac344 | 0.066655056  | 0.065990328 | 0.314240898 |
| pcaec340.pcaac386            | 0.010627463  | 0.010522069 | 0.314267901 |
| c14.tyrosine                 | 0.044646141  | 0.04420595  | 0.314295969 |
| pcaac385.pcaac404            | 0.028220211  | 0.027942335 | 0.314302228 |

|                           |              |             |             |
|---------------------------|--------------|-------------|-------------|
| smc202.pcaac365           | 0.039504838  | 0.039121459 | 0.314371415 |
| pcaac420.pcaec340         | -0.023958318 | 0.023725862 | 0.314372433 |
| pcaac381.pcaac300         | -0.051397218 | 0.050909906 | 0.314480123 |
| pcaec421.c16              | 0.014031432  | 0.013902095 | 0.314608425 |
| c102.lysopcac203          | -0.022304938 | 0.022101677 | 0.314659443 |
| c0.pcaec362               | 0.026510927  | 0.026273723 | 0.314739923 |
| putrescine.c181           | 0.011864417  | 0.011760137 | 0.314816837 |
| pcaac422.lysopcac281      | 0.015936393  | 0.015796784 | 0.314830907 |
| smc202.pcaac405           | -0.026692806 | 0.026459353 | 0.314837933 |
| pcaac405.lysopcac140      | 0.002510253  | 0.002488376 | 0.314852843 |
| c14.pcaec340              | 0.040619142  | 0.040267242 | 0.314878062 |
| glycine.lysopcac170       | -0.017098145 | 0.016950077 | 0.314879778 |
| pcaac321.c8               | 0.035276313  | 0.034971402 | 0.31488775  |
| pcaac344.pcaac402         | 0.049904052  | 0.049474704 | 0.314907215 |
| pcaec340.pcaec342         | -0.124094084 | 0.123036359 | 0.314946072 |
| c10.creatinine            | -0.020102182 | 0.019930888 | 0.314947242 |
| pcaac386.smohc221         | 0.029354301  | 0.029105619 | 0.314971286 |
| c102.histidine            | 0.051678584  | 0.051248683 | 0.315045663 |
| pcaac344.pcaec361         | -0.01320872  | 0.013099438 | 0.315067692 |
| c51dc.pcaec405            | -0.034407404 | 0.034125797 | 0.315110938 |
| ornithine.lysopcac280     | -0.019644915 | 0.019487462 | 0.31519336  |
| pcaac344.putrescine       | 0.048179787  | 0.047815356 | 0.315412496 |
| pcaac361.pcaec341         | 0.065579878  | 0.065098894 | 0.315524057 |
| pcaac344.kynurenine       | -0.007150452 | 0.007098328 | 0.3155458   |
| pcaec342.tyrosine         | -0.039333046 | 0.039054277 | 0.315643969 |
| lysopcac181.pcaac365      | 0.04734013   | 0.047006938 | 0.315667836 |
| smc241.smcl81             | 0.029590308  | 0.029382326 | 0.315672475 |
| creatinine.c182           | 0.03052926   | 0.030316536 | 0.315702022 |
| pcaec300.pcaec383         | -0.043731434 | 0.04343647  | 0.315810263 |
| lysopcac203.methionine    | -0.034673037 | 0.034439289 | 0.315811925 |
| lysopcac170.pcaac403      | -0.007652255 | 0.007601187 | 0.315844852 |
| spermidine.creatinine     | 0.038771551  | 0.038513023 | 0.31584761  |
| pcaac402.isoleucine       | -0.013791829 | 0.01369993  | 0.315849852 |
| lysopcac203.serine        | -0.040086307 | 0.039825351 | 0.315924342 |
| pcaec300.pcaac385         | -0.043456465 | 0.043176669 | 0.315958955 |
| pcaec381.acetylmethionine | -0.03882367  | 0.038576904 | 0.315998978 |
| pcaec402.pcaec445         | 0.032853401  | 0.032656716 | 0.316178149 |
| smc241.pcaec443           | 0.046731628  | 0.046453699 | 0.316197272 |
| pcaac361.c8               | 0.028451692  | 0.028282831 | 0.316203248 |
| lysopcac180.pcaec420      | 0.034537497  | 0.034336992 | 0.316266099 |
| pcaac381.pcaec424         | -0.003821006 | 0.003799608 | 0.316365576 |
| pcaec382.pcaec385         | -0.072413006 | 0.072022483 | 0.316466078 |
| lysopcac161.c3            | -0.050651868 | 0.05037871  | 0.316466153 |
| c162.smc260               | 0.024798209  | 0.024667945 | 0.316533979 |
| ornithine.pcaec401        | 0.014237199  | 0.014163592 | 0.316574155 |

|                                    |              |             |             |
|------------------------------------|--------------|-------------|-------------|
| asparagine.smc202                  | -0.042464917 | 0.042246089 | 0.316582339 |
| smohc221.pcaac362                  | -0.037602429 | 0.037409235 | 0.316589781 |
| pcaac445.leucine                   | 0.004266531  | 0.004244736 | 0.316604094 |
| methioninesulfoxide.lysopcac180    | -0.070699289 | 0.07033917  | 0.316611166 |
| pcaac424.pcaac381                  | 0.039647907  | 0.0394513   | 0.316676518 |
| smc261.pcaac445                    | 0.104183608  | 0.103711504 | 0.316883554 |
| pcaac343.glutamine                 | -0.011884963 | 0.011836904 | 0.317119787 |
| lysopcac161.c16                    | 0.034718895  | 0.034580138 | 0.31714256  |
| pcaac386.pcaac405                  | -0.055913037 | 0.055692613 | 0.317168864 |
| phenylalanine.glutamicacid         | 0.044895169  | 0.044719946 | 0.317187889 |
| creatinine.smc180                  | 0.019747347  | 0.019670736 | 0.317199215 |
| c181.valine                        | -0.050856797 | 0.050660463 | 0.317208428 |
| methioninesulfoxide.creatinine     | 0.012701415  | 0.012656169 | 0.317352767 |
| lysopcac181.valine                 | -0.0690927   | 0.068846874 | 0.317354881 |
| pcaac446.lysopcac182               | 0.034215201  | 0.034099176 | 0.317435625 |
| pcaac401.putrescine                | -0.053791319 | 0.053617531 | 0.317513159 |
| smc261.pcaac405                    | -0.021718197 | 0.021655578 | 0.317681259 |
| pcaac381.pcaac385                  | -0.038802616 | 0.038690805 | 0.317682074 |
| pcaac401.c102                      | -0.028723351 | 0.028642818 | 0.317719677 |
| pcaac365.glycine                   | 0.030768069  | 0.030682123 | 0.317724704 |
| isoleucine.lysopcac204             | -0.013728998 | 0.013693281 | 0.317817451 |
| smc160.pcaac281                    | 0.002062025  | 0.002056777 | 0.317844843 |
| lysopcac160.pcaac323               | -0.08486942  | 0.08465578  | 0.317858179 |
| lysine.lysopcac161                 | 0.070444577  | 0.070277245 | 0.317926777 |
| serine.pcaac380                    | 0.039804968  | 0.039711454 | 0.317939369 |
| h1.pcaac424                        | -0.005104512 | 0.005093293 | 0.31801254  |
| serine.pcaac323                    | 0.080682048  | 0.080517099 | 0.318086696 |
| smc240.pcaac301                    | 0.041348641  | 0.041268373 | 0.318136547 |
| pcaac420.pcaac445                  | 0.042508801  | 0.042428859 | 0.31816584  |
| pcaac301.lysine                    | -0.071225312 | 0.071095304 | 0.318192556 |
| smc261.pcaac422                    | -0.029299882 | 0.029247146 | 0.31820485  |
| pcaac385.pcaac321                  | -0.01881299  | 0.018780025 | 0.318227836 |
| lysopcac170.smc240                 | -0.036389268 | 0.036334359 | 0.318345363 |
| pcaac365.pcaac405                  | 0.078735738  | 0.078630251 | 0.318427054 |
| smc161.pcaac421                    | -0.020710101 | 0.020684335 | 0.318473228 |
| lysopcac161.histidine              | 0.073164182  | 0.073086988 | 0.318564486 |
| pcaac445.pcaac385                  | -0.071244153 | 0.071173411 | 0.318594467 |
| c142.pcaac405                      | -0.05173778  | 0.051688791 | 0.318616721 |
| pcaac405.lysopcac181               | 0.02026195   | 0.020245068 | 0.318671586 |
| pcaac422.pcaac421                  | -0.051722728 | 0.051688613 | 0.318755358 |
| smc261.pcaac385                    | -0.040844129 | 0.040820561 | 0.318795183 |
| arginine.glutamicacid              | 0.040790903  | 0.040768293 | 0.318806151 |
| pcaac381.leucine                   | -0.024338661 | 0.024325401 | 0.318810724 |
| c12.asparagine                     | -0.009055561 | 0.009050944 | 0.318827632 |
| asymmetricdimethylarginine.pcaac44 | 0.02305897   | 0.023047216 | 0.318827647 |

|                                |              |             |             |
|--------------------------------|--------------|-------------|-------------|
| pcaac401.pcaec364              | 0.004837785  | 0.004835404 | 0.3188361   |
| lysopcac182.pcaac383           | 0.011500807  | 0.011497834 | 0.318948828 |
| pcaac343.pcaec364              | -0.00803686  | 0.008036386 | 0.31904502  |
| pcaac281.lysopcac280           | 0.005637835  | 0.005637675 | 0.319059778 |
| pcaec384.pcaec341              | 0.054292454  | 0.054291369 | 0.319063854 |
| serotonin.pcaac323             | -0.069965085 | 0.069969144 | 0.319101463 |
| pcaac384.pcaac421              | -0.017574648 | 0.017578568 | 0.31918103  |
| pcaac323.lysopcac204           | -0.029395246 | 0.02940729  | 0.319271005 |
| smc181.arginine                | -0.020607752 | 0.020618258 | 0.319319233 |
| c142.pcaac321                  | 0.021482298  | 0.021496646 | 0.319395443 |
| lysopcac180.pcaec343           | 0.058211752  | 0.05825399  | 0.319423237 |
| c2.prolinr                     | 0.017293916  | 0.017307312 | 0.319446844 |
| c51.asymmetricdimethylarginine | 0.01415816   | 0.014170133 | 0.31948107  |
| c102.pcaec446                  | -0.025103374 | 0.025130414 | 0.319592602 |
| pcaac365.c4                    | -0.021492227 | 0.021515751 | 0.319600953 |
| c5.pcaec383                    | 0.085700279  | 0.085809654 | 0.319688483 |
| pcaac240.pcaac381              | 0.05660503   | 0.056682956 | 0.319736832 |
| histidine.lysopcac140          | 0.002528729  | 0.002532247 | 0.319743839 |
| c4.c142                        | -0.046538895 | 0.046610385 | 0.319813611 |
| pcaec422.lysopcac180           | 0.047576359  | 0.047654568 | 0.319865483 |
| pcaec420.c141oh                | 0.081430609  | 0.081577265 | 0.319941113 |
| c0.pcaac386                    | 0.031474272  | 0.031531371 | 0.319947445 |
| pcaec340.pcaac421              | 0.011915703  | 0.011938168 | 0.319981705 |
| pcaac240.pcaac425              | -0.132693706 | 0.132960944 | 0.320043597 |
| pcaac321.c14                   | 0.053607198  | 0.053716555 | 0.320056119 |
| pcaac421.pcaac300              | -0.053494427 | 0.053607984 | 0.320095972 |
| pcaac300.pcaac404              | 0.003034382  | 0.003040836 | 0.320098048 |
| c5.pcaec340                    | 0.074404819  | 0.074564507 | 0.32010724  |
| pcaec420.pcaec404              | -0.014188316 | 0.014219176 | 0.320121094 |
| pcaac300.c101                  | -0.006368164 | 0.006382715 | 0.320173942 |
| c8.pcaec383                    | 0.032742551  | 0.032817379 | 0.320174168 |
| pcaac362.c18                   | -0.030971258 | 0.031042284 | 0.320178011 |
| pcaec403.pcaec322              | 0.039002317  | 0.03909329  | 0.320196875 |
| pcaac383.prolinr               | 0.040349211  | 0.040461414 | 0.320412465 |
| c51dc.pcaec403                 | 0.048517537  | 0.048655917 | 0.320446786 |
| smc181.c102                    | 0.020573032  | 0.020632036 | 0.320454424 |
| smc160.pcaac405                | -0.026395188 | 0.026471471 | 0.320464991 |
| c4.pcaac425                    | -0.081371862 | 0.081617802 | 0.320528638 |
| arginine.c0                    | 0.000481436  | 0.000482911 | 0.320549401 |
| pcaec402.pcaec384              | -0.051766744 | 0.051928777 | 0.320580378 |
| pcaec322.pcaec382              | -0.040327365 | 0.040460552 | 0.320663334 |
| pcaac406.pcaac421              | -0.008615262 | 0.008645276 | 0.320750408 |
| smc241.pcaec363                | -0.030861537 | 0.030969183 | 0.320752414 |
| pcaac344.phenylalanine         | -0.043692505 | 0.043848148 | 0.320788065 |
| smc202.pcaec385                | -0.030634064 | 0.030743794 | 0.320797554 |

|                              |              |             |             |
|------------------------------|--------------|-------------|-------------|
| pcaac240.asparagine          | 0.0126978    | 0.012745106 | 0.320866511 |
| asparticacid.pcaec382        | -0.010889477 | 0.010931434 | 0.320927736 |
| pcaec386.pcaec384            | 0.072515871  | 0.072798335 | 0.320948027 |
| pcaec401.asparticacid        | 0.030012613  | 0.030132447 | 0.320994895 |
| serotonin.pcaec342           | -0.068192672 | 0.068466326 | 0.321004575 |
| kynurenine.pcaec340          | 0.028066533  | 0.028180375 | 0.321025331 |
| serine.pcaec341              | 0.027909391  | 0.028024067 | 0.32105063  |
| c101.pcaac300                | -0.022551882 | 0.022644584 | 0.321051466 |
| putrescine.valine            | -0.056861169 | 0.057105938 | 0.321144657 |
| serine.pcaac403              | 0.005088103  | 0.005110475 | 0.321188945 |
| pcaec301.pcaac404            | -0.017588674 | 0.017668227 | 0.321249435 |
| lysopcac180.lysopcac280      | 0.005820118  | 0.005847449 | 0.321332437 |
| smc202.smohc161              | -0.010629571 | 0.010679591 | 0.321337169 |
| smc241.pcaec385              | -0.054159524 | 0.054419568 | 0.321383095 |
| c4.serotonin                 | 0.069856092  | 0.070198165 | 0.321428864 |
| pcaec383.pcaac405            | -0.047123848 | 0.047367234 | 0.321557441 |
| alanine.acetylmethionine     | 0.03078718   | 0.030948264 | 0.321589744 |
| smc240.lysine                | 0.038322664  | 0.038523297 | 0.321591268 |
| acetylmethionine.leucine     | 0.017997803  | 0.018093914 | 0.321641529 |
| pcaec405.lysopcac204         | -0.055773943 | 0.056073581 | 0.321656987 |
| lysopcac160.pcaac421         | -0.011348238 | 0.011409496 | 0.321669306 |
| c142.pcaec421                | -0.001760992 | 0.001770626 | 0.321704109 |
| c12.pcaec421                 | -0.00238503  | 0.002398464 | 0.321781842 |
| pcaec300.c8                  | 0.044692779  | 0.044945997 | 0.321797659 |
| pcaac403.pcaec363            | 0.030919703  | 0.031098463 | 0.321853124 |
| lysopcac281.c162             | -0.070476756 | 0.070900374 | 0.321963046 |
| pcaac323.transhydroxyproline | 0.023010504  | 0.023149161 | 0.321970269 |
| pcaec404.pcaac405            | -0.046136871 | 0.046420023 | 0.322023656 |
| pcaac383.smc160              | -0.066395632 | 0.066813322 | 0.32209731  |
| pcaec301.lysopcac180         | -0.048857871 | 0.049165376 | 0.322098723 |
| pcaec380.pcaac323            | -0.036395799 | 0.036627803 | 0.322137337 |
| smc261.smc181                | -0.010347443 | 0.010416741 | 0.3222919   |
| pcaac281.smc181              | 0.034328235  | 0.034561614 | 0.322340427 |
| pcaac380.pcaac403            | -0.00717737  | 0.007226538 | 0.322365314 |
| pcaec381.lysopcac204         | -0.071814943 | 0.072311255 | 0.322394318 |
| creatinine.c3                | 0.024819389  | 0.024991679 | 0.32240905  |
| pcaec385.pcaac281            | 0.001253947  | 0.001262663 | 0.322413459 |
| c162.c4                      | -0.033784431 | 0.034020862 | 0.322436094 |
| lysine.lysopcac203           | 0.022774908  | 0.022935766 | 0.322467079 |
| lysopcac182.smohc161         | -0.008751219 | 0.00881322  | 0.322477578 |
| pcaac386.pcaec341            | -0.058597406 | 0.059031643 | 0.322633459 |
| pcaac363.glutamine           | -0.006769567 | 0.006820255 | 0.322670348 |
| smc181.spermidine            | 0.053053676  | 0.053452022 | 0.322680281 |
| c101.histidine               | 0.035706532  | 0.035975804 | 0.322696025 |
| pcaac421.pcaac403            | -0.010876582 | 0.010959834 | 0.322750097 |



|                              |              |             |             |
|------------------------------|--------------|-------------|-------------|
| pcaec421.c51                 | -0.108917706 | 0.109780307 | 0.322877123 |
| pcaac426.pcaac323            | -0.060410895 | 0.060893377 | 0.322909133 |
| pcaac281.phenylalanine       | -0.035400523 | 0.035684879 | 0.322931066 |
| pcaec422.smc260              | -0.023945145 | 0.024138361 | 0.32294856  |
| lysopcac180.lysopcac140      | -0.002430939 | 0.002450625 | 0.322962589 |
| pcaac380.pcaec402            | 0.05505961   | 0.055512489 | 0.323023237 |
| pcaac300.asparticacid        | -0.03147654  | 0.031738045 | 0.323062776 |
| c101.c102                    | -0.033418639 | 0.033698386 | 0.323092932 |
| pcaec445.glycine             | -0.030192596 | 0.03044956  | 0.323159787 |
| pcaac361.c4                  | -0.011334691 | 0.01143319  | 0.32324546  |
| serotonin.pcaec340           | 0.051001077  | 0.051446403 | 0.323265369 |
| pcaac361.putrescine          | 0.019574049  | 0.019747403 | 0.323324926 |
| pcaec402.pcaec382            | -0.042489605 | 0.042877053 | 0.323450286 |
| pcaec340.pcaec445            | 0.041744694  | 0.042126854 | 0.323467511 |
| c102.asparticacid            | -0.036701955 | 0.037038627 | 0.323476325 |
| pcaac386.c162                | -0.043581137 | 0.043984057 | 0.323510782 |
| lysopcac140.pcaac240         | 0.016864209  | 0.017026809 | 0.323700134 |
| pcaac421.leucine             | 0.016653624  | 0.016815553 | 0.323739115 |
| pcaac362.glutamine           | -0.009224321 | 0.009314037 | 0.323740414 |
| lysine.pcaec300              | 0.018859448  | 0.019047277 | 0.323851797 |
| pcaac385.asparticacid        | 0.027937069  | 0.02822048  | 0.323940222 |
| pcaec340.pcaac366            | -0.024958439 | 0.025214485 | 0.32399476  |
| pcaec385.pcaac424            | -0.011297491 | 0.011414795 | 0.32405408  |
| pcaac426.pcaac425            | -0.12620561  | 0.127523787 | 0.324083414 |
| pcaec384.pcaac323            | -0.097207325 | 0.098227752 | 0.324108587 |
| arginine.c182                | 0.024913653  | 0.025181967 | 0.324238497 |
| smc240.pcaac385              | -0.014752026 | 0.014911115 | 0.324245388 |
| c0.prolinr                   | 0.012145009  | 0.012276533 | 0.324267004 |
| pcaec364.lysopcac160         | -0.007999464 | 0.008089936 | 0.324495995 |
| lysopcac161.pcaec405         | -0.032962635 | 0.033336069 | 0.324505171 |
| pcaec443.lysopcac160         | -0.021239688 | 0.021482098 | 0.324545248 |
| pcaac385.methionine          | -0.020174834 | 0.020407257 | 0.324596411 |
| serotonin.pcaac406           | -0.04796068  | 0.048523959 | 0.324703261 |
| pcaec383.pcaac343            | 0.024583999  | 0.024875466 | 0.324756317 |
| c4.lysopcac170               | 0.028035095  | 0.028384607 | 0.325047335 |
| pcaac401.pcaac300            | -0.04719747  | 0.047791695 | 0.325106024 |
| pcaec380.pcaac405            | -0.042088663 | 0.042622815 | 0.325154077 |
| lysopcac204.pcaac323         | -0.060907664 | 0.061681811 | 0.325163151 |
| lysopcac170.pcaec424         | -0.003859139 | 0.003908724 | 0.325229193 |
| glycine.pcaec382             | 0.007894087  | 0.007996537 | 0.325290657 |
| c5.pcaec443                  | 0.093809957  | 0.095028621 | 0.325296711 |
| glutamine.methionine         | -0.024055951 | 0.024375515 | 0.325436332 |
| pcaec361.glutamine           | -0.008839524 | 0.008957458 | 0.325463668 |
| smc261.smc161                | 0.059318564  | 0.060131012 | 0.325632386 |
| methioninesulfoxide.pcaec424 | 0.007599692  | 0.007704439 | 0.325673627 |

|                         |              |             |             |
|-------------------------|--------------|-------------|-------------|
| smc202.pcaec421         | -0.001342913 | 0.001361481 | 0.325694328 |
| c12.creatinine          | -0.027078507 | 0.027453437 | 0.325703571 |
| pcaac420.smohc221       | 0.037357224  | 0.037885051 | 0.325838193 |
| pcaac321.pcaac421       | 0.010848217  | 0.011002151 | 0.325866999 |
| smohc241.c51dc          | -0.09088576  | 0.092183348 | 0.325908512 |
| c141oh.pcaec361         | -0.008110468 | 0.008226789 | 0.325939394 |
| pcaec322.c5             | -0.004407302 | 0.004470732 | 0.325963184 |
| pcaec405.pcaac323       | -0.039634071 | 0.040208354 | 0.326009504 |
| pcaac380.smc160         | -0.047925135 | 0.048620418 | 0.326018082 |
| c162.pcaec402           | -0.021244059 | 0.021555976 | 0.326101173 |
| c101.c12                | 0.035518931  | 0.036064122 | 0.326417839 |
| pcaac321.lysopcac170    | 0.017591425  | 0.017862125 | 0.326436279 |
| pcaac362.lysopcac280    | 0.005303906  | 0.005386007 | 0.326479609 |
| pcaac300.pcaac385       | -0.027086207 | 0.02750748  | 0.32651457  |
| smc261.lysopcac160      | 0.024190916  | 0.024567724 | 0.326525659 |
| alanine.pcaec446        | 0.044075755  | 0.044772187 | 0.326632144 |
| pcaac381.prolinr        | -0.023856129 | 0.024233965 | 0.326649865 |
| lysopcac280.lysopcac161 | 0.084343982  | 0.085680445 | 0.326653313 |
| smc261.pcaac402         | -0.022523478 | 0.022882244 | 0.326692751 |
| c51dc.pcaac384          | -0.035664572 | 0.036233808 | 0.326708096 |
| smohc161.smc161         | 0.069298033  | 0.070404699 | 0.326712283 |
| pcaec445.ornithine      | -0.020599424 | 0.020930561 | 0.326762272 |
| creatinine.lysopcac182  | 0.023194634  | 0.023570974 | 0.32683357  |
| lysopcac170.kynurenine  | -0.00761012  | 0.007733908 | 0.326852988 |
| kynurenine.pcaac421     | 0.026755088  | 0.027192034 | 0.326883862 |
| pcaac402.prolinr        | -0.019081574 | 0.019403464 | 0.327138865 |
| c16.histidine           | 0.058234627  | 0.05922026  | 0.327165456 |
| creatinine.smohc161     | -0.027689965 | 0.028160924 | 0.327204838 |
| pcaec360.pcaec364       | 0.047160113  | 0.047966611 | 0.327248914 |
| pcaac366.c14            | -0.053678102 | 0.054613233 | 0.327400451 |
| c102.pcaac320           | -0.059791102 | 0.060835507 | 0.327422478 |
| pcaac403.c16            | 0.012223318  | 0.012437354 | 0.327442805 |
| citruiline.pcaac300     | 0.049348351  | 0.050215548 | 0.327472412 |
| pcaec420.leucine        | 0.00556168   | 0.005661037 | 0.327610543 |
| pcaec364.pcaac380       | 0.052560752  | 0.053501422 | 0.327625795 |
| pcaec322.pcaec405       | -0.038453416 | 0.039142009 | 0.327630711 |
| pcaec343.pcaac343       | 0.030334748  | 0.03088174  | 0.327689745 |
| glutamicacid.pcaac281   | -0.001583705 | 0.001612329 | 0.327709893 |
| pcaac366.pcaec365       | -0.024963405 | 0.025414737 | 0.327712412 |
| pcaec380.pcaec300       | 0.013910536  | 0.014162254 | 0.327719872 |
| isoleucine.lysopcac160  | 0.014156198  | 0.014412367 | 0.327720051 |
| lysopcac161.prolinr     | 0.041265532  | 0.042019261 | 0.327800281 |
| pcaac420.c18            | -0.025881891 | 0.02636267  | 0.327947246 |
| pcaac402.pcaac406       | 0.053654549  | 0.054652092 | 0.32795487  |
| c141oh.pcaec301         | -0.029780668 | 0.030338165 | 0.328015511 |

|                                   |              |             |             |
|-----------------------------------|--------------|-------------|-------------|
| pcaac341.c2                       | 0.057848467  | 0.058932092 | 0.328021202 |
| c0.pcaac425                       | -0.059266288 | 0.060385305 | 0.328091714 |
| pcaec380.lysopcac140              | 0.001402887  | 0.001429508 | 0.32813653  |
| pcaec321.pcaac421                 | 0.008746461  | 0.008912916 | 0.328162633 |
| smc240.smohc141                   | 0.036121677  | 0.036829431 | 0.328428619 |
| pcaec343.pcaec363                 | -0.052570792 | 0.053608312 | 0.32849578  |
| pcaec383.c16                      | 0.012306889  | 0.012550728 | 0.328532435 |
| pcaac420.pcaac362                 | -0.011144527 | 0.011366588 | 0.328585547 |
| glutamicacid.smc241               | -0.054747277 | 0.055850675 | 0.328693656 |
| pcaec343.methionine               | 0.03062667   | 0.031245851 | 0.328723263 |
| smc181.lysopcac181                | 0.038581842  | 0.039362957 | 0.328736779 |
| pcaac422.glutamine                | -0.010507616 | 0.010720577 | 0.328747025 |
| pcaec445.pcaac381                 | 0.015003314  | 0.015308775 | 0.328790583 |
| c141.pcaac240                     | -0.008613372 | 0.008789297 | 0.328821278 |
| pcaac422.c141oh                   | 0.080532797  | 0.082191723 | 0.328903853 |
| c182.pcaec402                     | -0.016302472 | 0.016642066 | 0.329013133 |
| pcaec386.pcaac381                 | -0.032341088 | 0.033015992 | 0.329030841 |
| pcaac323.pcaec421                 | -0.001308223 | 0.001335536 | 0.329035418 |
| pcaec321.c3                       | -0.026248066 | 0.026796104 | 0.329035985 |
| glutamine.asparticacid            | 0.034945619  | 0.035681075 | 0.329114589 |
| c181.pcaac344                     | -0.027826132 | 0.028415363 | 0.329175837 |
| pcaec360.transhydroxyproline      | -0.038746135 | 0.039567924 | 0.329191929 |
| pcaac385.smc181                   | -0.044574097 | 0.045520809 | 0.329205852 |
| pcaac322.pcaac380                 | -0.031607267 | 0.032280244 | 0.329230762 |
| lysopcac181.smc261                | 0.039112278  | 0.0399459   | 0.329241014 |
| pcaac405.alanine                  | 0.056054853  | 0.057251789 | 0.329259587 |
| pcaac402.creatinine               | 0.013154325  | 0.013435223 | 0.329260145 |
| pcaec301.lysopcac281              | 0.007992882  | 0.008164836 | 0.32933527  |
| lysopcac161.pcaac402              | -0.02613225  | 0.026696049 | 0.329364287 |
| pcaec361.lysopcac181              | 0.028487457  | 0.029115682 | 0.329589682 |
| smc260.pcaec384                   | 0.053469476  | 0.054655634 | 0.329651523 |
| lysopcac204.pcaac403              | -0.00293986  | 0.003005089 | 0.329653342 |
| pcaac366.creatinine               | 0.008889031  | 0.009086867 | 0.329685605 |
| pcaec422.transhydroxyproline      | -0.031447805 | 0.032148479 | 0.329697115 |
| pcaac361.smohc221                 | 0.036968471  | 0.037798147 | 0.329773602 |
| pcaec361.phenylalanine            | -0.042331305 | 0.043282907 | 0.329791075 |
| smc160.smc240                     | -0.049530819 | 0.050654159 | 0.329885211 |
| pcaec385.lysine                   | -0.062613512 | 0.064040291 | 0.329935857 |
| c51.smohc222                      | 0.003276675  | 0.003351589 | 0.329971609 |
| pcaec405.pcaec422                 | -0.042788749 | 0.043768887 | 0.32999209  |
| pcaac384.lysopcac280              | 0.00395749   | 0.004048556 | 0.330041394 |
| asymmetricdimethylarginine.smc180 | -0.019654612 | 0.020108827 | 0.330087912 |
| pcaac422.leucine                  | -0.023975836 | 0.024530838 | 0.330106077 |
| pcaac386.lysopcac140              | 0.000878195  | 0.000898689 | 0.330194512 |
| pcaac425.pcaec446                 | 0.096080833  | 0.098336623 | 0.330261331 |

|                      |              |             |             |
|----------------------|--------------|-------------|-------------|
| pcaec300.smc180      | -0.011613407 | 0.011892662 | 0.330528665 |
| pcaac420.pcaec382    | -0.027833491 | 0.028506533 | 0.330592221 |
| pcaac404.pcaac422    | -0.031472521 | 0.032250724 | 0.330848771 |
| c182.pcaac422        | 0.023727501  | 0.024315536 | 0.330875311 |
| asparagine.pcaec341  | 0.051409101  | 0.052684372 | 0.330886355 |
| pcaac422.creatinine  | 0.009204355  | 0.009432844 | 0.330894651 |
| pcaac402.lysopcac180 | -0.065696623 | 0.067328478 | 0.330901837 |
| c12.pcaec301         | -0.052397787 | 0.053704268 | 0.330946337 |
| pcaec360.histidine   | 0.042373538  | 0.04343989  | 0.33105522  |
| lysopcac204.prolinr  | -0.023498912 | 0.024096481 | 0.33117937  |
| pcaec401.c141oh      | 0.0785824    | 0.080602467 | 0.331309384 |
| pcaac344.pcaec382    | 0.008864276  | 0.009095582 | 0.331491551 |
| pcaec385.lysopcac140 | -0.003021249 | 0.003100471 | 0.331551453 |
| c10.lysine           | 0.051865709  | 0.053228603 | 0.331577563 |
| pcaec340.arginine    | -0.029327719 | 0.030101731 | 0.331631309 |
| pcaec421.isoleucine  | -0.011694977 | 0.012007042 | 0.33176831  |
| pcaec403.c141oh      | 0.071087073  | 0.072989288 | 0.33180362  |
| lysopcac280.c51dc    | -0.092371075 | 0.094858128 | 0.33188135  |
| pcaec364.putrescine  | -0.075218593 | 0.077260201 | 0.331983514 |
| pcaac360.pcaac344    | -0.063064418 | 0.064776425 | 0.331985675 |
| pcaec401.c16         | 0.016467809  | 0.016915687 | 0.332009245 |
| pcaec404.pcaec363    | 0.034224973  | 0.035158367 | 0.332044492 |
| pcaec423.pcaac300    | -0.042567698 | 0.043734374 | 0.332107902 |
| pcaac364.alanine     | -0.013915497 | 0.014297617 | 0.332132501 |
| pcaec322.smc180      | -0.021157324 | 0.021741163 | 0.332195867 |
| pcaec386.lysopcac170 | 0.01350758   | 0.013881243 | 0.332227795 |
| c10.smohc241         | 0.062706354  | 0.064455433 | 0.332335601 |
| ornithine.putrescine | -0.036838441 | 0.037866436 | 0.332341375 |
| methionine.c8        | -0.035795012 | 0.036797833 | 0.332393019 |
| pcaec444.pcaac421    | 0.009846109  | 0.010122929 | 0.332439436 |
| pcaec421.smohc221    | -0.081483363 | 0.083777338 | 0.332457231 |
| pcaec383.glutamine   | -0.012871925 | 0.013234469 | 0.332463201 |
| c101.glutamine       | 0.00972583   | 0.010001644 | 0.332553886 |
| pcaac321.pcaec380    | -0.054266078 | 0.055809632 | 0.33259381  |
| creatinine.ornithine | 0.028848789  | 0.029674425 | 0.332675901 |
| c5.pcaac321          | 0.046930284  | 0.048278705 | 0.332728838 |
| pcaec321.pcaac381    | 0.01747793   | 0.017980552 | 0.332740598 |
| pcaac320.smc260      | -0.020669235 | 0.021264525 | 0.332760856 |
| pcaac422.pcaac362    | -0.012214511 | 0.012567053 | 0.3327898   |
| pcaec381.pcaac365    | -0.048242054 | 0.04963782  | 0.332822551 |
| pcaac426.smohc221    | -0.046179465 | 0.047516223 | 0.332829332 |
| alanine.pcaec444     | 0.06374922   | 0.065607703 | 0.332925782 |
| pcaec446.c51dc       | -0.089763311 | 0.092381397 | 0.332932106 |
| smc261.isoleucine    | 0.020016606  | 0.020602085 | 0.332971014 |
| pcaec364.pcaac403    | -0.003031196 | 0.003121007 | 0.333148441 |

|                                    |              |             |             |
|------------------------------------|--------------|-------------|-------------|
| lysopcac182.pcaec341               | 0.030318111  | 0.031218158 | 0.333175583 |
| asymmetricdimethylarginine.pcaec42 | -0.032668784 | 0.033645669 | 0.333276594 |
| smc240.pcaec424                    | -0.002502791 | 0.002577859 | 0.333319149 |
| pcaac323.pcaac300                  | -0.032795526 | 0.033785316 | 0.333406599 |
| pcaec424.smc202                    | -0.065681886 | 0.067668018 | 0.333433724 |
| ornithine.pcaac383                 | 0.00986847   | 0.010167486 | 0.333462483 |
| pcaac300.lysopcac204               | -0.013201674 | 0.013602725 | 0.333499228 |
| pcaac320.pcaac425                  | -0.086141989 | 0.088762555 | 0.333519207 |
| pcaac404.c14                       | 0.022705472  | 0.023397709 | 0.33355017  |
| pcaac362.smohc222                  | 0.018244883  | 0.018803024 | 0.333598743 |
| c18.pcaec385                       | -0.04697738  | 0.04842381  | 0.333691444 |
| pcaec424.pcaac421                  | 0.011158601  | 0.011503348 | 0.333740663 |
| c8.pcaec445                        | -0.043956477 | 0.045315815 | 0.333754391 |
| pcaac385.arginine                  | 0.025427959  | 0.026217557 | 0.333814062 |
| smohc161.pcaac322                  | 0.04803886   | 0.049546261 | 0.333966558 |
| pcaec300.c12                       | 0.040058733  | 0.041315858 | 0.33396809  |
| pcaec385.pcaec360                  | 0.003380153  | 0.003486959 | 0.334068893 |
| lysopcac170.tyrosine               | -0.056279886 | 0.058060393 | 0.334086991 |
| pcaec321.pcaac323                  | -0.034931495 | 0.036037859 | 0.334103677 |
| pcaec342.alanine                   | -0.014813863 | 0.01528576  | 0.334188984 |
| pcaec385.smohc241                  | 0.056475003  | 0.058277431 | 0.334217182 |
| serine.pcaac321                    | 0.019076893  | 0.019687003 | 0.334248048 |
| smohc221.lysopcac182               | -0.018724596 | 0.019324979 | 0.334286453 |
| smc161.pcaac364                    | 0.036460755  | 0.037630369 | 0.334293367 |
| pcaec445.kynurenine                | 0.014292694  | 0.014751676 | 0.334309366 |
| alphaaminoadipicacid.pcaac404      | 0.012638942  | 0.01304569  | 0.33434165  |
| pcaec425.pcaac421                  | 0.012754398  | 0.013164875 | 0.334342096 |
| pcaac361.glutamine                 | -0.006100973 | 0.006299186 | 0.334484683 |
| lysopcac182.pcaac385               | 0.02316778   | 0.023926826 | 0.334612634 |
| pcaec406.pcaec424                  | -0.005235622 | 0.005407569 | 0.334649407 |
| pcaac383.methionine                | -0.025023014 | 0.025844895 | 0.334650878 |
| pcaac402.c16                       | 0.011787702  | 0.012179481 | 0.334833306 |
| lysopcac281.smohc161               | 0.011367893  | 0.011747714 | 0.334915099 |
| methionine.pcaec424                | 0.009987488  | 0.01032149  | 0.334929263 |
| c0.pcaac402                        | 0.039852054  | 0.041189992 | 0.334990104 |
| smc261.histidine                   | 0.039946505  | 0.041288539 | 0.335000895 |
| glycine.pcaec401                   | 0.017447411  | 0.018034759 | 0.335032644 |
| lysopcac161.pcaec425               | 0.00720565   | 0.007448709 | 0.335064285 |
| asparagine.pcaec380                | -0.055226742 | 0.057098073 | 0.335135432 |
| pcaec403.pcaec404                  | 0.038557073  | 0.039870462 | 0.335218803 |
| pcaec380.creatinine                | 0.008651556  | 0.008946521 | 0.335232962 |
| pcaac360.pcaac361                  | -0.042444604 | 0.043895407 | 0.335273574 |
| asymmetricdimethylarginine.pcaac38 | -0.022182659 | 0.022943362 | 0.335325558 |
| c162.pcaec322                      | 0.052660797  | 0.054471777 | 0.33537064  |
| ornithine.pcaac240                 | 0.006947486  | 0.007188788 | 0.335530236 |

|                                 |              |             |             |
|---------------------------------|--------------|-------------|-------------|
| pcaec443.isoleucine             | -0.013540229 | 0.014011072 | 0.335549444 |
| c16.pcaec321                    | 0.01460175   | 0.015109813 | 0.335559254 |
| pcaac384.creatinine             | -0.007019648 | 0.00726733  | 0.335787012 |
| pcaac403.creatinine             | 0.009561214  | 0.009902136 | 0.335960317 |
| pcaac321.transhydroxyproline    | -0.019839124 | 0.020547744 | 0.335988939 |
| serine.arginine                 | -0.054886019 | 0.05685278  | 0.336042518 |
| pcaac421.tyrosine               | -0.048464192 | 0.050202361 | 0.336057151 |
| pcaec321.pcaec424               | -0.005996065 | 0.006211186 | 0.336062759 |
| pcaec401.isoleucine             | -0.016778198 | 0.017381012 | 0.336086633 |
| smc261.lysopcac182              | -0.031155137 | 0.032275775 | 0.336105777 |
| lysopcac182.alanine             | -0.019854989 | 0.020571185 | 0.336153076 |
| pcaec383.isoleucine             | -0.01217423  | 0.012614661 | 0.336202305 |
| c142.pcaec301                   | -0.049699175 | 0.051498152 | 0.336211624 |
| pcaec402.pcaac322               | 0.042474859  | 0.044015554 | 0.336246844 |
| c5.pcaec422                     | -0.02876477  | 0.029810446 | 0.336283807 |
| methioninesulfoxide.lysopcac204 | -0.122427128 | 0.126890449 | 0.336332277 |
| pcaac402.pcaac300               | -0.049244959 | 0.051045712 | 0.336383525 |
| pcaec423.c101                   | -0.028488315 | 0.029535438 | 0.33647131  |
| c51dc.lysine                    | -0.065932823 | 0.068357912 | 0.336482913 |
| kynurenine.lysopcac203          | -0.020548438 | 0.021309695 | 0.336606323 |
| pcaec301.pcaec406               | 0.01149935   | 0.011926128 | 0.33663711  |
| pcaac322.smc240                 | 0.038125819  | 0.039541796 | 0.336649349 |
| alanine.pcaac321                | -0.030228027 | 0.031351261 | 0.336658215 |
| c0.pcaec361                     | -0.008921708 | 0.009255531 | 0.336778131 |
| c18.pcaec380                    | -0.013448624 | 0.013952488 | 0.336800816 |
| smohc161.lysopcac170            | 0.012636029  | 0.013111226 | 0.336866121 |
| smc160.c51dc                    | -0.08279329  | 0.085908323 | 0.336874309 |
| pcaac402.c4                     | -0.023150947 | 0.024029098 | 0.337016897 |
| glycine.pcaec363                | 0.010406754  | 0.010801745 | 0.337027939 |
| pcaec322.pcaec340               | -0.047164554 | 0.048955151 | 0.337032385 |
| smc241.transhydroxyproline      | -0.030473796 | 0.031631345 | 0.337041733 |
| pcaec446.smc161                 | -0.062975481 | 0.065382582 | 0.337152028 |
| c14.pcaac426                    | 0.055903478  | 0.058048292 | 0.337218601 |
| pcaec423.pcaec404               | -0.017979582 | 0.018678637 | 0.337456942 |
| smc160.transhydroxyproline      | -0.024647505 | 0.025609612 | 0.337528391 |
| pcaec420.pcaac424               | -0.010273844 | 0.010675226 | 0.337544    |
| pcaec406.lysopcac161            | -0.082130784 | 0.085339962 | 0.33754662  |
| c101.phenylalanine              | -0.037813607 | 0.039291317 | 0.33754884  |
| c12.lysopcac280                 | -0.009318677 | 0.009683543 | 0.337583827 |
| ornithine.pcaac380              | 0.045022486  | 0.046791309 | 0.337645568 |
| smc181.pcaec383                 | 0.055776428  | 0.057995769 | 0.337878264 |
| serotonin.methioninesulfoxide   | 0.025585299  | 0.026610074 | 0.338000179 |
| pcaac344.pcaec300               | 0.012366243  | 0.01286192  | 0.338013972 |
| pcaac300.creatinine             | 0.006384815  | 0.006641126 | 0.338042117 |
| pcaac364.pcaec404               | -0.020098612 | 0.020907198 | 0.338082405 |

|                                    |              |             |             |
|------------------------------------|--------------|-------------|-------------|
| pcaac343.c8                        | 0.031278773  | 0.032537688 | 0.338090419 |
| pcaec300.pcaac366                  | -0.022379067 | 0.023281009 | 0.338115744 |
| pcaec362.pcaac420                  | 0.055379854  | 0.057617664 | 0.33816454  |
| histidine.pcaec383                 | -0.040268444 | 0.041896401 | 0.338173429 |
| smohc222.lysopcac180               | 0.05091397   | 0.052972409 | 0.338174421 |
| pcaec300.pcaac365                  | -0.043993424 | 0.045784418 | 0.33830432  |
| spermidine.c8                      | 0.01110292   | 0.011555254 | 0.338317999 |
| lysopcac281.c4                     | -0.01055437  | 0.010985623 | 0.338373569 |
| pcaac401.c141                      | -0.031684801 | 0.032979562 | 0.338375215 |
| glutamicacid.pcaec385              | -0.072698575 | 0.075669796 | 0.338378293 |
| lysopcac181.c162                   | -0.077873454 | 0.081058257 | 0.338390662 |
| c12.pcaec405                       | -0.028132007 | 0.02928552  | 0.338439885 |
| serotonin.smc240                   | 0.041266619  | 0.042964262 | 0.338502227 |
| smohc221.spermidine                | 0.049981364  | 0.052042964 | 0.338552612 |
| methioninesulfoxide.c4             | -0.02176105  | 0.022664674 | 0.33868088  |
| pcaac381.pcaac426                  | 0.076433257  | 0.079609518 | 0.338695287 |
| pcaac420.alanine                   | -0.009593231 | 0.009994436 | 0.338818062 |
| pcaac422.pcaac406                  | 0.038576917  | 0.040191662 | 0.338834751 |
| methioninesulfoxide.c16            | 0.01851943   | 0.019296615 | 0.338884711 |
| creatinine.pcaac384                | 0.049201692  | 0.051266617 | 0.33888593  |
| pcaac344.pcaac363                  | 0.017957468  | 0.018711355 | 0.338892058 |
| methionine.pcaec444                | -0.0914368   | 0.095277473 | 0.338902105 |
| pcaec423.c51                       | -0.076270128 | 0.079480449 | 0.338942703 |
| asymmetricdimethylarginine.pcaac36 | -0.036793474 | 0.038344953 | 0.338977699 |
| pcaec420.lysopcac280               | 0.005902721  | 0.006153366 | 0.339114087 |
| h1.pcaac384                        | -0.0606104   | 0.06318462  | 0.339118267 |
| smc260.smc202                      | -0.031094907 | 0.032419144 | 0.339171541 |
| pcaac323.c3                        | 0.033257821  | 0.03467617  | 0.339199292 |
| c101.creatinine                    | -0.00476132  | 0.004965248 | 0.339283798 |
| lysopcac281.pcaac426               | 0.059795092  | 0.062378788 | 0.339458726 |
| smc261.pcaac362                    | -0.010767905 | 0.011233793 | 0.339485111 |
| pcaec401.methionine                | -0.03695786  | 0.038557075 | 0.339487393 |
| smohc221.c51dc                     | -0.092068426 | 0.096055846 | 0.339504926 |
| pcaec424.lysopcac161               | 0.043303783  | 0.045181307 | 0.339526953 |
| pcaec402.tyrosine                  | -0.047892287 | 0.049971386 | 0.339552291 |
| pcaec340.c162                      | -0.061226879 | 0.063887278 | 0.33957052  |
| putrescine.asparagine              | -0.00402098  | 0.004195816 | 0.339584166 |
| pcaac365.lysopcac140               | 0.001258398  | 0.001313246 | 0.339632239 |
| smohc241.smc181                    | 0.018343729  | 0.019143474 | 0.339637962 |
| putrescine.pcaec385                | 0.058670647  | 0.061235079 | 0.339689264 |
| pcaac360.pcaac300                  | -0.044980807 | 0.046946962 | 0.339690208 |
| pcaec404.pcaec321                  | -0.036169301 | 0.037750547 | 0.3396934   |
| c101.c142                          | -0.058083362 | 0.060666962 | 0.340045127 |
| lysopcac140.pcaec446               | 0.091257755  | 0.095320674 | 0.340063774 |
| pcaec342.alphaaminoadipicacid      | 0.010515567  | 0.010984536 | 0.340098884 |

|                               |              |             |             |
|-------------------------------|--------------|-------------|-------------|
| c181.smc160                   | 0.052622336  | 0.054970033 | 0.340106488 |
| lysine.smc181                 | 0.010705206  | 0.011182847 | 0.340108139 |
| pcaec341.pcaac421             | 0.01061905   | 0.011092938 | 0.340112083 |
| pcaac366.citruline            | 0.010678867  | 0.011158519 | 0.340245586 |
| glutamine.pcaac343            | -0.016148842 | 0.01687553  | 0.340283987 |
| c4.lysopcac160                | 0.00553851   | 0.005787753 | 0.340285145 |
| lysine.c12                    | 0.06124116   | 0.064001773 | 0.34032007  |
| smc160.smc181                 | 0.022991997  | 0.024029334 | 0.340338286 |
| pcaac323.smc261               | 0.033760075  | 0.035283471 | 0.340341463 |
| creatinine.c102               | 0.036385973  | 0.038034111 | 0.340420559 |
| pcaac363.pcaac321             | -0.018393913 | 0.019228583 | 0.340458109 |
| methioninesulfoxide.pcaac380  | 0.054764271  | 0.057272223 | 0.340650446 |
| kynurenine.lysopcac182        | 0.036143624  | 0.03780026  | 0.340668583 |
| pcaac383.glutamine            | -0.009282648 | 0.009713365 | 0.340928659 |
| asymmetricdimethylarginine.c5 | -0.007909402 | 0.008276926 | 0.34095922  |
| ornithine.pcaac381            | 0.013313921  | 0.013933377 | 0.340986953 |
| c12.c181                      | 0.017018423  | 0.017812624 | 0.341051412 |
| pcaac320.pcaac366             | -0.012439675 | 0.013023105 | 0.341158828 |
| pcaac344.lysopcac281          | 0.00725621   | 0.007598514 | 0.341284339 |
| pcaec425.pcaec363             | 0.027511283  | 0.028810183 | 0.341302474 |
| c102.pcaac420                 | -0.05167182  | 0.054111786 | 0.341305724 |
| pcaac420.pcaec443             | 0.036803334  | 0.038545247 | 0.34135621  |
| alanine.pcaec401              | 0.012694202  | 0.013296626 | 0.341414245 |
| c4.pcaac380                   | 0.01925073   | 0.020164475 | 0.341418324 |
| acetylorlithoine.pcaac322     | 0.050753546  | 0.053163095 | 0.341422899 |
| smc240.lysopcac280            | 0.005365776  | 0.005620658 | 0.341434843 |
| lysine.c182                   | 0.055929979  | 0.058589907 | 0.34146089  |
| phenylalanine.c2              | -0.050835095 | 0.053256344 | 0.341493644 |
| lysopcac170.smohc241          | 0.049085272  | 0.051426931 | 0.341528761 |
| c182.lysopcac181              | -0.036114505 | 0.037841196 | 0.34157725  |
| pcaac240.pcaac365             | 0.062489434  | 0.065477258 | 0.341578045 |
| pcaec421.creatinine           | 0.012381545  | 0.012974743 | 0.341622413 |
| c12.c102                      | 0.031434158  | 0.032945176 | 0.341695596 |
| smc161.c16                    | 0.026549961  | 0.027833291 | 0.341818219 |
| pcaec402.leucine              | -0.020145541 | 0.021119475 | 0.341822117 |
| pcaac405.pcaac406             | 0.042314311  | 0.044362185 | 0.341845894 |
| pcaec383.creatinine           | 0.007950881  | 0.008336239 | 0.341878311 |
| c181.pcaac386                 | 0.012273319  | 0.012868288 | 0.341882581 |
| pcaec381.c141oh               | 0.058812385  | 0.061667706 | 0.341916072 |
| pcaec321.alanine              | -0.011473123 | 0.012030411 | 0.341926947 |
| pcaec363.tyrosine             | -0.039785408 | 0.041718195 | 0.34193014  |
| smohc161.smc240               | -0.018039027 | 0.018917912 | 0.341994817 |
| pcaec422.pcaec401             | 0.07081957   | 0.074300141 | 0.342190099 |
| pcaec445.pcaec403             | -0.031602057 | 0.033163268 | 0.342307097 |
| pcaec365.creatinine           | -0.01822395  | 0.019128166 | 0.342405537 |



|                                |              |             |             |
|--------------------------------|--------------|-------------|-------------|
| pcaac343.glutamine             | -0.007000633 | 0.007348732 | 0.34245454  |
| smc260.pcaec424                | -0.004665376 | 0.004897383 | 0.342457135 |
| alphaaminoadipicacid.serotonin | 0.069896351  | 0.07338604  | 0.342547455 |
| pcaac366.pcaec300              | 0.013942889  | 0.014639627 | 0.342567721 |
| pcaac366.pcaac323              | -0.033444278 | 0.035118506 | 0.342608668 |
| pcaac386.pcaac321              | -0.015894609 | 0.016695698 | 0.342764347 |
| pcaac364.methionine            | -0.018122029 | 0.019036594 | 0.342795006 |
| pcaac281.pcaec385              | -0.044106889 | 0.046338226 | 0.342851002 |
| prolinr.pcaec425               | 0.013293753  | 0.013970185 | 0.342985665 |
| phenylalanine.pcaac365         | -0.040448747 | 0.04251073  | 0.343028791 |
| pcaac425.lysopcac203           | -0.045200958 | 0.047510031 | 0.343077731 |
| pcaac403.pcaac380              | 0.058832018  | 0.061837746 | 0.343080205 |
| histidine.pcaec423             | 0.025490227  | 0.026797927 | 0.343177219 |
| c142.histidine                 | 0.042472345  | 0.044660052 | 0.343271906 |
| pcaec423.smc160                | -0.039891856 | 0.04195116  | 0.343323679 |
| pcaac366.smc161                | 0.058277203  | 0.061288915 | 0.343349702 |
| lysopcac170.phenylalanine      | -0.04101406  | 0.043134183 | 0.343355888 |
| c162.pcaec404                  | 0.028635072  | 0.030118489 | 0.343406941 |
| pcaac360.c16                   | 0.024007938  | 0.025252421 | 0.343421604 |
| pcaac380.pcaac385              | -0.026271357 | 0.027638188 | 0.343509006 |
| pcaec360.pcaec421              | -0.001382864 | 0.001454964 | 0.343559516 |
| c182.c51dc                     | 0.083507121  | 0.087861098 | 0.343560009 |
| smc241.pcaac425                | 0.079454018  | 0.083599377 | 0.343575582 |
| pcaac344.alanine               | -0.02874681  | 0.030250543 | 0.343637985 |
| smc261.pcaec423                | 0.025593838  | 0.026938369 | 0.343740262 |
| pcaac360.glycine               | 0.03774042   | 0.039727459 | 0.343793627 |
| c101.lysopcac140               | -0.001399982 | 0.001473801 | 0.343829441 |
| c12.pcaec401                   | -0.018791793 | 0.019784008 | 0.343862267 |
| pcaac300.smohc221              | -0.028947998 | 0.030482454 | 0.343956795 |
| putrescine.pcaec384            | 0.011581905  | 0.012196476 | 0.343982221 |
| pcaac364.pcaac422              | -0.036572028 | 0.0385178   | 0.344046531 |
| pcaec342.smc160                | 0.101522784  | 0.10696337  | 0.344222747 |
| lysopcac281.asparagine         | 0.007004903  | 0.007380892 | 0.344261672 |
| pcaec362.pcaec340              | 0.05182116   | 0.054604223 | 0.344275393 |
| c141.c5                        | -0.007360262 | 0.007755595 | 0.344278441 |
| glutamicacid.pcaec380          | 0.045479059  | 0.047924087 | 0.344301165 |
| pcaec386.pcaec383              | 0.060065331  | 0.063297087 | 0.344320513 |
| pcaac281.lysopcac170           | 0.009556836  | 0.010071485 | 0.344342146 |
| c4.pcaec341                    | 0.044803372  | 0.047222339 | 0.344405715 |
| smc240.pcaec382                | -0.006614094 | 0.006971895 | 0.344454056 |
| pcaec385.pcaec342              | -0.091123916 | 0.096057716 | 0.34447558  |
| pcaac406.isoleucine            | 0.023192464  | 0.024450305 | 0.344517112 |
| histidine.smohc222             | -0.005083117 | 0.00535891  | 0.344527077 |
| pcaac364.pcaac321              | -0.020062831 | 0.021157987 | 0.344677369 |
| pcaac364.c141oh                | 0.063117964  | 0.066564792 | 0.344687863 |

|                               |              |             |             |
|-------------------------------|--------------|-------------|-------------|
| c10.pcaec341                  | 0.051491502  | 0.054308687 | 0.344734519 |
| lysine.pcaac320               | 0.09228692   | 0.097341431 | 0.344760913 |
| pcaec301.pcaac361             | -0.044944759 | 0.047411042 | 0.344808372 |
| kynurenine.isoleucine         | 0.015652355  | 0.016517538 | 0.344991264 |
| pcaac425.c141oh               | 0.068997334  | 0.072818504 | 0.345039778 |
| pcaec444.pcaac381             | 0.013219179  | 0.013951832 | 0.345058974 |
| lysopcac203.pcaec402          | -0.023343666 | 0.024638188 | 0.345073299 |
| pcaec443.creatinine           | 0.009029596  | 0.009530781 | 0.34509594  |
| pcaec422.pcaec382             | -0.010969696 | 0.011578723 | 0.34510247  |
| pcaac401.lysopcac170          | -0.025424887 | 0.026837141 | 0.345114809 |
| pcaec446.kynurenine           | 0.007641252  | 0.00806701  | 0.34519328  |
| pcaec383.lysopcac203          | 0.013951557  | 0.014729039 | 0.34519735  |
| pcaec423.pcaac420             | -0.092142524 | 0.097279916 | 0.345209885 |
| pcaac381.pcaec401             | -0.065070673 | 0.068708632 | 0.34527955  |
| serine.pcaac364               | 0.052523069  | 0.055467305 | 0.345347045 |
| isoleucine.asparagine         | 0.006996694  | 0.007389759 | 0.345402844 |
| pcaac383.creatinine           | 0.006326589  | 0.006682445 | 0.345434343 |
| citruiline.lysopcac204        | 0.035564696  | 0.037578582 | 0.345606454 |
| pcaac300.leucine              | 0.005941841  | 0.006279384 | 0.345689163 |
| smc161.pcaec424               | -0.005871252 | 0.006204805 | 0.345690794 |
| histidine.pcaec421            | 0.002366851  | 0.002501433 | 0.345713391 |
| pcaac343.smc240               | 0.034810316  | 0.036793802 | 0.34576743  |
| c181.pcaec342                 | -0.05576392  | 0.058941928 | 0.345772233 |
| pcaec361.pcaac384             | -0.040563757 | 0.042889903 | 0.345933687 |
| smc240.pcaac420               | 0.039799506  | 0.042084528 | 0.345964557 |
| pcaec443.pcaac405             | -0.041288992 | 0.043660069 | 0.345970485 |
| smc160.pcaac420               | 0.052139563  | 0.055135235 | 0.345983439 |
| pcaac323.smohc141             | -0.039336555 | 0.041600817 | 0.346031811 |
| glutamicacid.pcaec343         | 0.056191364  | 0.059431169 | 0.346075158 |
| pcaec343.lysopcac204          | -0.018652237 | 0.019732651 | 0.346196729 |
| ornithine.alanine             | 0.01791416   | 0.018954531 | 0.346265429 |
| c162.lysopcac160              | 0.01113158   | 0.011778769 | 0.34629475  |
| pcaec361.smohc222             | -0.009216431 | 0.009752658 | 0.346313756 |
| pcaac422.lysopcac204          | 0.043994853  | 0.046557641 | 0.346345677 |
| arginine.pcaec380             | 0.039667825  | 0.04198475  | 0.346416621 |
| pcaac366.lysopcac140          | 0.001378548  | 0.001459071 | 0.346418015 |
| pcaec321.pcaac321             | -0.026278324 | 0.027814836 | 0.346445    |
| c182.c181                     | 0.011359353  | 0.012024685 | 0.346490686 |
| pcaec402.lysopcac280          | 0.012302277  | 0.013023523 | 0.346516035 |
| lysopcac203.creatinine        | 0.006010775  | 0.006364129 | 0.346588467 |
| pcaac401.pcaec363             | 0.031143816  | 0.032976184 | 0.346610741 |
| pcaec385.lysopcac161          | -0.06907679  | 0.073153342 | 0.346692037 |
| lysopcac182.smc202            | -0.034510237 | 0.036551938 | 0.346758944 |
| c141oh.pcaec341               | 0.037417815  | 0.039640428 | 0.346866782 |
| pcaec365.alphaaminoadipicacid | 0.007457264  | 0.007900238 | 0.346867588 |

|                                    |              |             |             |
|------------------------------------|--------------|-------------|-------------|
| spermidine.leucine                 | 0.042459858  | 0.044984978 | 0.346898948 |
| smohc161.pcaac381                  | -0.026479686 | 0.028058593 | 0.346969867 |
| pcaec425.pcaec443                  | 0.054761092  | 0.058034538 | 0.347037795 |
| lysopcac204.c141                   | 0.02475188   | 0.026232041 | 0.347048265 |
| pcaac322.methionine                | -0.01973076  | 0.020911136 | 0.347059238 |
| pcaac323.pcaac406                  | 0.022585565  | 0.023936744 | 0.347059573 |
| pcaac403.asparticacid              | 0.042723019  | 0.045279854 | 0.347069498 |
| pcaec403.isoleucine                | -0.009882024 | 0.010474486 | 0.347117878 |
| pcaac424.pcaac422                  | -0.117326223 | 0.124362539 | 0.34712639  |
| pcaec402.kynurenine                | -0.005216986 | 0.005530086 | 0.347145969 |
| smc240.c141                        | -0.038376169 | 0.040679628 | 0.347149475 |
| pcaec301.c18                       | 0.040908355  | 0.043365835 | 0.347171995 |
| pcaac321.lysopcac160               | -0.01514107  | 0.016050876 | 0.347179174 |
| lysopcac181.glutamine              | -0.009053972 | 0.009598571 | 0.347207123 |
| pcaac320.pcaac422                  | -0.022586994 | 0.023947029 | 0.347235631 |
| pcaac300.c18                       | 0.028999575  | 0.030746817 | 0.347252584 |
| pcaac343.pcaac420                  | 0.084999884  | 0.090133335 | 0.347317416 |
| pcaac405.kynurenine                | -0.006495799 | 0.006890879 | 0.347511006 |
| pcaac403.h1                        | 0.003378226  | 0.003583887 | 0.347537119 |
| pcaac403.pcaec385                  | -0.064525694 | 0.068461004 | 0.347586835 |
| asymmetricdimethylarginine.pcaec38 | 0.043358984  | 0.046009579 | 0.347651664 |
| smohc222.pcaac300                  | 0.05238995   | 0.05561213  | 0.347820275 |
| smc202.smc261                      | 0.030917654  | 0.032820722 | 0.347842467 |
| pcaac320.lysopcac161               | -0.07905404  | 0.083934192 | 0.347923506 |
| pcaec406.pcaac384                  | -0.032943846 | 0.034979634 | 0.347952406 |
| c5.pcaac385                        | 0.10165651   | 0.107971293 | 0.348098616 |
| pcaac320.pcaec444                  | 0.080630232  | 0.085661175 | 0.348223646 |
| asymmetricdimethylarginine.leucine | -0.005346574 | 0.00568063  | 0.348262155 |
| pcaac361.pcaec342                  | 0.089887018  | 0.095510175 | 0.348297281 |
| methionine.pcaac344                | 0.040027122  | 0.042533568 | 0.348324709 |
| ornithine.c142                     | -0.054658106 | 0.058090238 | 0.34840339  |
| c0.spermidine                      | -0.050985603 | 0.05421709  | 0.348668972 |
| histidine.lysopcac161              | 0.058848236  | 0.062585854 | 0.348728814 |
| smc161.pcaac381                    | -0.024109793 | 0.02564461  | 0.34879506  |
| lysopcac180.c12                    | -0.045208453 | 0.048090295 | 0.348833974 |
| pcaec424.pcaac365                  | 0.043246747  | 0.046006843 | 0.348868482 |
| pcaec360.pcaac381                  | 0.031387053  | 0.033399492 | 0.349001589 |
| pcaec385.pcaac321                  | -0.017138789 | 0.018243133 | 0.349145367 |
| lysopcac203.lysine                 | 0.053646312  | 0.057105966 | 0.349170059 |
| pcaac342.glutamine                 | -0.008410115 | 0.008952538 | 0.349172944 |
| serotonin.pcaec363                 | -0.017202329 | 0.018314952 | 0.349255139 |
| pcaec422.asparticacid              | 0.023590688  | 0.025125789 | 0.349432752 |
| pcaec321.pcaec340                  | -0.066656328 | 0.070994391 | 0.349436673 |
| pcaac322.pcaac402                  | 0.042800901  | 0.045601694 | 0.349597499 |
| pcaec424.c3                        | -0.024828298 | 0.026460797 | 0.34973896  |

|                               |              |             |             |
|-------------------------------|--------------|-------------|-------------|
| c51.pcaec382                  | -0.007682303 | 0.008187429 | 0.349739141 |
| pcaac322.c51dc                | -0.074022501 | 0.078891561 | 0.349750934 |
| citruine.pcaec365             | -0.014716432 | 0.015685747 | 0.349790603 |
| pcaec384.c5                   | -0.004216206 | 0.004493975 | 0.349797515 |
| pcaec385.kynurenine           | -0.006586712 | 0.007024278 | 0.350045369 |
| alphaaminoadipicacid.pcaec422 | -0.02309903  | 0.024636608 | 0.350105257 |
| pcaac344.c3                   | 0.033575462  | 0.035811658 | 0.350122126 |
| pcaac240.pcaac322             | 0.052077229  | 0.055545923 | 0.350124213 |
| pcaec445.pcaac361             | 0.034239802  | 0.036521363 | 0.350136835 |
| pcaec361.pcaec402             | -0.09215098  | 0.098297207 | 0.350165019 |
| smohc141.smc240               | -0.024863975 | 0.026527517 | 0.35025882  |
| c16.c2                        | 0.076849384  | 0.081992229 | 0.350265743 |
| lysopcac170.lysine            | 0.055416491  | 0.059129332 | 0.350300742 |
| pcaec341.smohc222             | 0.004166536  | 0.004445776 | 0.3503101   |
| pcaac300.pcaec301             | -0.047250785 | 0.050428814 | 0.350417712 |
| pcaac425.lysopcac140          | 0.000907277  | 0.000968515 | 0.350524395 |
| pcaac281.pcaac321             | -0.019204314 | 0.020502597 | 0.35057291  |
| pcaec381.smc202               | -0.061073154 | 0.065213967 | 0.350661581 |
| smc161.pcaac344               | -0.045955884 | 0.049077471 | 0.350717725 |
| pcaac420.pcaac300             | -0.031076767 | 0.033187903 | 0.350720967 |
| smc180.pcaec424               | -0.004371407 | 0.004668492 | 0.350733559 |
| smohc141.pcaac420             | 0.056381376  | 0.060220761 | 0.350794587 |
| pcaec381.pcaac300             | -0.048434539 | 0.051736253 | 0.350826912 |
| lysopcac181.lysopcac161       | -0.120132395 | 0.128357723 | 0.350961882 |
| pcaec385.c102                 | 0.019121522  | 0.02043157  | 0.350981131 |
| pcaec340.lysopcac170          | 0.011366199  | 0.012146554 | 0.351045865 |
| smc161.pcaac405               | -0.040706214 | 0.043506628 | 0.35110875  |
| serotonin.pcaec444            | -0.053190527 | 0.056851079 | 0.351119484 |
| serine.pcaec422               | -0.02432347  | 0.026001308 | 0.351191631 |
| pcaac426.pcaac422             | -0.028345214 | 0.030301091 | 0.351201417 |
| c141oh.pcaac321               | 0.015432329  | 0.016498952 | 0.351252658 |
| pcaac320.pcaec404             | -0.017155768 | 0.018342392 | 0.351275808 |
| pcaac363.lysopcac280          | 0.006571138  | 0.00702565  | 0.351275961 |
| c182.pcaac240                 | -0.011142505 | 0.011913295 | 0.351279412 |
| pcaec342.creatinine           | 0.004553601  | 0.004868682 | 0.351287572 |
| pcaac344.arginine             | 0.037461565  | 0.040060563 | 0.351370137 |
| pcaac281.c101                 | -0.007505082 | 0.008027002 | 0.351444011 |
| c51dc.kynurenine              | 0.006281716  | 0.006718824 | 0.351462823 |
| pcaec381.pcaec322             | 0.045044085  | 0.048179076 | 0.351469148 |
| pcaec446.c3                   | -0.013108314 | 0.01402292  | 0.351547552 |
| ornithine.pcaec446            | 0.015594046  | 0.016683313 | 0.351582768 |
| ornithine.asparticacid        | 0.017344295  | 0.018561752 | 0.35173625  |
| pcaec342.c101                 | -0.005955337 | 0.006373419 | 0.351740429 |
| pcaec321.smohc241             | -0.088642099 | 0.094870176 | 0.351766487 |
| c12.smc180                    | -0.007860744 | 0.008414149 | 0.351829377 |

|                          |              |             |             |
|--------------------------|--------------|-------------|-------------|
| pcaac384.lysopcac170     | 0.006814437  | 0.00729424  | 0.351833286 |
| citruline.threonine      | -0.038148021 | 0.040837021 | 0.351868581 |
| pcaac362.pcaec363        | -0.024524625 | 0.02625766  | 0.351947725 |
| smc241.pcaac281          | 0.001063009  | 0.001138328 | 0.352032424 |
| phenylalanine.pcaac421   | 0.013608519  | 0.014574687 | 0.35209664  |
| h1.phenylalanine         | 0.047081917  | 0.050426747 | 0.352117049 |
| methionine.pcaec404      | 0.011230076  | 0.012028228 | 0.352130475 |
| pcaec340.smohc161        | 0.019863258  | 0.021275326 | 0.352137943 |
| pcaec444.glutamine       | -0.007672756 | 0.008219187 | 0.352195128 |
| pcaec444.pcaec380        | 0.032030692  | 0.034319922 | 0.352308428 |
| pcaec380.acetylorithoine | -0.026712107 | 0.028622444 | 0.352328987 |
| pcaac402.pcaec301        | 0.065931411  | 0.070649286 | 0.352347595 |
| smc202.lysopcac204       | -0.026102994 | 0.027975395 | 0.352425522 |
| lysopcac160.pcaec383     | -0.090174481 | 0.096662101 | 0.352521302 |
| pcaac422.glutamicacid    | 0.049587379  | 0.053165171 | 0.352613573 |
| c18.c141                 | 0.017992554  | 0.019291231 | 0.352625795 |
| methionine.pcaec383      | -0.049129778 | 0.052682867 | 0.352689312 |
| pcaec423.lysopcac180     | 0.053634968  | 0.05751977  | 0.352738499 |
| pcaac321.pcaec301        | -0.06975196  | 0.074811133 | 0.352783482 |
| pcaec405.lysopcac182     | -0.031839378 | 0.034152822 | 0.352841184 |
| pcaec383.methionine      | -0.032740251 | 0.035120144 | 0.35285472  |
| pcaac366.c18             | -0.039279994 | 0.042138892 | 0.352896075 |
| pcaac240.c181            | 0.015749978  | 0.016896695 | 0.352907236 |
| creatinine.pcaec300      | 0.011666905  | 0.012521041 | 0.353087308 |
| pcaec403.creatinine      | 0.010432979  | 0.011198353 | 0.353154795 |
| pcaac281.lysopcac281     | -0.02544367  | 0.027317246 | 0.353277819 |
| pcaec446.pcaec422        | -0.024908061 | 0.026743776 | 0.353306146 |
| pcaac403.smc260          | -0.038521552 | 0.041364276 | 0.35334907  |
| pcaac385.pcaec401        | 0.025718468  | 0.027616568 | 0.353352351 |
| pcaec362.pcaac421        | 0.021347891  | 0.022923833 | 0.353360789 |
| pcaec421.pcaec363        | 0.026255301  | 0.028196433 | 0.353410418 |
| pcaec385.pcaac425        | -0.066723928 | 0.071677712 | 0.353548926 |
| pcaec380.methionine      | -0.033748483 | 0.036257006 | 0.353587765 |
| smc161.c101              | -0.007847037 | 0.008431534 | 0.353657587 |
| glutamicacid.smc161      | 0.069200438  | 0.074361928 | 0.353702798 |
| pcaec384.glutamine       | -0.009684057 | 0.010408585 | 0.353805055 |
| pcaec361.c101            | -0.027347107 | 0.029395048 | 0.353836465 |
| pcaec342.phenylalanine   | -0.034099897 | 0.036653617 | 0.353837553 |
| acetylorithoine.pcaec406 | -0.014219028 | 0.015284589 | 0.353859739 |
| pcaec340.glutamine       | -0.006639622 | 0.007137621 | 0.353888803 |
| pcaac281.pcaec341        | 0.098437089  | 0.105839267 | 0.353974873 |
| h1.pcaec383              | -0.076739506 | 0.082519997 | 0.354032476 |
| smohc141.c2              | -0.052118123 | 0.056047395 | 0.354061707 |
| pcaec361.pcaec383        | -0.081882482 | 0.088077893 | 0.354182402 |
| pcaec321.lysopcac280     | 0.007512784  | 0.008081787 | 0.354216185 |

|                               |              |             |             |
|-------------------------------|--------------|-------------|-------------|
| histidine.pcaac321            | 0.026902898  | 0.028943974 | 0.354274277 |
| pcaec421.pcaac425             | -0.141154396 | 0.151900064 | 0.354389665 |
| pcaec360.lysopcac170          | 0.016910186  | 0.018198631 | 0.354419268 |
| smohc161.pcaec422             | -0.01907386  | 0.020528106 | 0.354441296 |
| pcaec425.pcaac425             | -0.073639657 | 0.07926354  | 0.354498092 |
| lysopcac182.creatinine        | 0.004803181  | 0.005170981 | 0.354588989 |
| pcaec343.pcaac403             | -0.003048956 | 0.003282442 | 0.354591085 |
| pcaac381.pcaec405             | 0.075559166  | 0.081373413 | 0.354756185 |
| lysopcac182.pcaec405          | -0.030046523 | 0.032363137 | 0.35482358  |
| kynurenine.lysopcac280        | -0.00718656  | 0.007741688 | 0.354887889 |
| pcaec422.leucine              | -0.028475712 | 0.030689497 | 0.355109396 |
| smohc141.c14                  | -0.02338034  | 0.025198694 | 0.355122688 |
| pcaec301.lysopcac170          | 0.007813353  | 0.008421545 | 0.355152666 |
| smc240.pcaec360               | -0.009141466 | 0.009853392 | 0.355169824 |
| pcaac360.pcaac385             | -0.012644191 | 0.013629917 | 0.355205438 |
| c141.pcaec301                 | -0.045623136 | 0.049188634 | 0.355291007 |
| leucine.smc160                | -0.041728775 | 0.044992573 | 0.355319241 |
| pcaec340.c12                  | 0.040122034  | 0.0432662   | 0.355386181 |
| c3.lysopcac160                | 0.0077444    | 0.008351395 | 0.355392161 |
| pcaec382.pcaec424             | -0.047084141 | 0.050778461 | 0.355429326 |
| glycine.pcaac386              | -0.019999423 | 0.021571486 | 0.355493069 |
| pcaac404.pcaac402             | -0.049338507 | 0.053217324 | 0.355497952 |
| pcaac240.leucine              | -0.009168149 | 0.009890186 | 0.355559501 |
| putrescine.pcaac424           | -0.020337777 | 0.021939678 | 0.355563936 |
| c2.lysopcac161                | -0.055575325 | 0.059954669 | 0.355579632 |
| pcaec340.pcaac385             | -0.021293804 | 0.022971819 | 0.355580876 |
| pcaec403.lysopcac170          | -0.014892696 | 0.016068008 | 0.355632308 |
| pcaac426.pcaac403             | -0.016397221 | 0.017691481 | 0.355638077 |
| c162.pcaec421                 | -0.001497498 | 0.001615763 | 0.355657548 |
| c0.pcaec380                   | 0.042033778  | 0.045353695 | 0.355660523 |
| putrescine.pcaac344           | 0.055115649  | 0.059470797 | 0.355676626 |
| pcaac322.leucine              | 0.005304429  | 0.005724136 | 0.355723487 |
| asparticacid.pcaac342         | 0.048155505  | 0.051968122 | 0.355745361 |
| smc202.lysopcac140            | -0.000971634 | 0.00104878  | 0.355845438 |
| phenylalanine.smc181          | -0.016229226 | 0.017522222 | 0.355966507 |
| lysopcac170.pcaec361          | 0.004637272  | 0.005006878 | 0.355980892 |
| alphaaminoadipicacid.pcaac421 | 0.006689615  | 0.007222882 | 0.355986409 |
| lysopcac140.pcaac281          | -0.000781544 | 0.000843921 | 0.356029448 |
| c181.pcaac422                 | 0.022522676  | 0.02432423  | 0.356107539 |
| smohc221.pcaec424             | -0.01649908  | 0.01781974  | 0.356132424 |
| c10.spermidine                | 0.047678592  | 0.051499764 | 0.356176774 |
| spermidine.lysopcac161        | -0.137386039 | 0.148411921 | 0.356225756 |
| pcaec423.pcaec340             | -0.048207075 | 0.052077445 | 0.356239785 |
| pcaac384.kynurenine           | -0.004560252 | 0.004926649 | 0.356266125 |
| pcaac343.arginine             | 0.037287679  | 0.040314057 | 0.356628682 |

|                                   |              |             |             |
|-----------------------------------|--------------|-------------|-------------|
| pcaec322.pcaec321                 | 0.066973051  | 0.072409707 | 0.356634805 |
| asymmetricdimethylarginine.smc241 | 0.025143786  | 0.027186821 | 0.356669071 |
| pcaac320.smohc221                 | 0.047835974  | 0.051733871 | 0.356771296 |
| pcaac380.pcaac281                 | 0.001200382  | 0.001298417 | 0.35685338  |
| pcaac420.h1                       | 0.007489148  | 0.008101036 | 0.356868259 |
| pcaac425.pcaac300                 | -0.038418752 | 0.041560949 | 0.356905785 |
| lysopcac170.smc181                | 0.01231146   | 0.013319085 | 0.356930799 |
| c101.pcaec383                     | 0.03691866   | 0.039941272 | 0.356943062 |
| pcaec342.c18                      | -0.021027629 | 0.022749813 | 0.356955809 |
| h1.valine                         | -0.053354726 | 0.057733635 | 0.35703141  |
| lysopcac140.pcaac426              | -0.034300757 | 0.0371197   | 0.357080799 |
| pcaec300.creatinine               | 0.004271626  | 0.004623123 | 0.357126556 |
| pcaac385.pcaec365                 | -0.02767693  | 0.029956403 | 0.357159168 |
| pcaec401.pcaec365                 | -0.022774999 | 0.024653474 | 0.357212148 |
| asparagine.pcaec401               | 0.014975415  | 0.01621246  | 0.357267638 |
| pcaac406.pcaec444                 | 0.113586875  | 0.122974662 | 0.357286897 |
| pcaac240.pcaac384                 | 0.02646868   | 0.028657844 | 0.357313109 |
| alanine.lysopcac203               | 0.017046727  | 0.018462624 | 0.357468912 |
| glutamine.lysopcac180             | 0.04855128   | 0.052585821 | 0.357486093 |
| smc180.smohc221                   | 0.067472906  | 0.073088742 | 0.357544693 |
| pcaac385.pcaac384                 | 0.079662187  | 0.086298148 | 0.357575791 |
| c8.pcaec365                       | -0.020200739 | 0.021888523 | 0.357686095 |
| pcaac240.pcaec382                 | -0.013671213 | 0.014813905 | 0.35770075  |
| histidine.pcaac323                | 0.084262913  | 0.091308683 | 0.357715236 |
| serotonin.c18                     | 0.049903424  | 0.05408026  | 0.35775145  |
| lysopcac203.pcaac403              | -0.005643905 | 0.006116445 | 0.35776355  |
| c4.c141                           | -0.024867189 | 0.026953391 | 0.357837845 |
| phenylalanine.pcaac381            | 0.01490381   | 0.016155088 | 0.357865771 |
| isoleucine.pcaec361               | 0.005184674  | 0.005620026 | 0.35787108  |
| c182.pcaac344                     | -0.023960782 | 0.025975042 | 0.357913481 |
| pcaec385.glutamine                | -0.009774276 | 0.010596027 | 0.357917009 |
| creatinine.lysopcac280            | -0.004862674 | 0.005271592 | 0.357926009 |
| pcaac383.c102                     | 0.02042102   | 0.022138659 | 0.357934017 |
| pcaec443.lysopcac170              | -0.010330942 | 0.011202498 | 0.358045563 |
| pcaec424.c51                      | -0.08773611  | 0.095143242 | 0.358072716 |
| pcaac300.pcaec446                 | -0.03437141  | 0.03727988  | 0.358158321 |
| pcaac422.asparagine               | -0.007760722 | 0.008418314 | 0.358208882 |
| ornithine.pcaac361                | -0.065262445 | 0.070795616 | 0.358231    |
| lysopcac140.lysopcac182           | -0.012505355 | 0.013565628 | 0.35823193  |
| pcaec342.pcaec405                 | -0.040867078 | 0.0443326   | 0.35823827  |
| putrescine.glycine                | 0.018084599  | 0.019618468 | 0.358245551 |
| pcaec425.spermidine               | -0.047130703 | 0.051131125 | 0.358273377 |
| pcaac406.pcaac344                 | -0.041569796 | 0.045099287 | 0.358284799 |
| pcaac323.c182                     | 0.036911993  | 0.040048207 | 0.358311055 |
| pcaec384.pcaac281                 | -0.001504964 | 0.001632848 | 0.358315479 |

|                                 |              |             |             |
|---------------------------------|--------------|-------------|-------------|
| pcaec404.isoleucine             | -0.009079413 | 0.009850985 | 0.358318032 |
| citruline.pcaec424              | 0.002609624  | 0.002832485 | 0.35850318  |
| pcaac321.creatinine             | 0.008051888  | 0.008740031 | 0.358531377 |
| pcaac380.pcaec365               | -0.019201988 | 0.020849622 | 0.358682205 |
| pcaec360.pcaac343               | -0.031522133 | 0.034231107 | 0.358741067 |
| pcaac321.asparagine             | 0.006077981  | 0.00660057  | 0.35875957  |
| pcaac420.pcaac404               | 0.004598655  | 0.004994439 | 0.358796815 |
| c181.pcaac383                   | 0.01309629   | 0.014223944 | 0.358814313 |
| pcaec301.pcaec383               | -0.05639659  | 0.061254337 | 0.358827835 |
| lysopcac281.methionine          | -0.028881447 | 0.031374748 | 0.358913106 |
| pcaec364.pcaec380               | 0.037641355  | 0.040892712 | 0.358934472 |
| pcaac364.lysopcac281            | 0.012374646  | 0.013444748 | 0.358977757 |
| serine.c51dc                    | -0.086410942 | 0.093898375 | 0.359054349 |
| pcaac421.pcaac385               | -0.044478037 | 0.048336763 | 0.359101351 |
| serotonin.pcaac403              | -0.002579757 | 0.002803673 | 0.359119603 |
| c162.pcaac321                   | 0.011971145  | 0.013013027 | 0.359223415 |
| pcaec361.putrescine             | 0.034833726  | 0.037865588 | 0.359225808 |
| pcaec361.pcaec380               | 0.046150383  | 0.050168062 | 0.359233781 |
| pcaec402.pcaac381               | 0.024058213  | 0.026160087 | 0.359370333 |
| pcaac426.lysopcac204            | -0.020896189 | 0.022724802 | 0.359433432 |
| pcaec342.pcaec385               | -0.048433328 | 0.052674294 | 0.359457028 |
| smc181.c18                      | -0.02141476  | 0.023309595 | 0.359861899 |
| pcaec425.glutamine              | -0.009144713 | 0.009954449 | 0.359890164 |
| smohc221.pcaac420               | 0.033409657  | 0.036368973 | 0.359903246 |
| lysopcac170.glutamine           | -0.010695989 | 0.011644588 | 0.359951938 |
| pcaac322.glutamine              | -0.013662916 | 0.014875476 | 0.359978712 |
| lysopcac161.glutamine           | -0.007951558 | 0.008657807 | 0.360009844 |
| pcaec322.lysopcac280            | 0.007330161  | 0.007983501 | 0.360146834 |
| pcaec381.pcaac426               | 0.066943557  | 0.072912043 | 0.360158491 |
| smc202.lysopcac182              | -0.023702619 | 0.025816996 | 0.360179319 |
| pcaec444.pcaec402               | -0.03027444  | 0.032980363 | 0.360256436 |
| smohc141.c101                   | -0.009171973 | 0.009993231 | 0.360326815 |
| smohc221.c5                     | -0.005143544 | 0.005604574 | 0.360367582 |
| leucine.lysopcac180             | -0.039387537 | 0.042927113 | 0.36046984  |
| methioninesulfoxide.ornithine   | 0.05589913   | 0.0609256   | 0.360493998 |
| c142.smc161                     | -0.039892503 | 0.04348412  | 0.360543202 |
| pcaec364.histidine              | 0.045993568  | 0.050137046 | 0.360567731 |
| pcaac422.acetylorithoine        | -0.031118397 | 0.033925953 | 0.360626392 |
| lysopcac281.pcaac421            | 0.012031539  | 0.01311712  | 0.360629124 |
| pcaec402.pcaec404               | 0.017723807  | 0.0193234   | 0.360639253 |
| methioninesulfoxide.lysopcac182 | -0.038717233 | 0.042213653 | 0.360663627 |
| alanine.pcaec424                | -0.013509621 | 0.014734049 | 0.360807312 |
| smohc161.arginine               | -0.017623354 | 0.019222969 | 0.360865692 |
| c142.c5                         | -0.004489597 | 0.004899893 | 0.361138334 |
| c182.asparticacid               | 0.011289212  | 0.012321215 | 0.361150116 |



|                                   |              |             |             |
|-----------------------------------|--------------|-------------|-------------|
| c4.pcaec301                       | 0.071476742  | 0.078014285 | 0.361171574 |
| serine.c102                       | 0.021950495  | 0.02395978  | 0.361203687 |
| pcaec421.histidine                | 0.090210237  | 0.098475691 | 0.361241933 |
| h1.pcaec341                       | 0.049168348  | 0.053683354 | 0.361331012 |
| pcaec342.pcaac366                 | -0.01768703  | 0.019314951 | 0.361424351 |
| pcaac425.histidine                | 0.068885905  | 0.075229056 | 0.361442576 |
| pcaec341.lysopcac161              | 0.04750744   | 0.051882087 | 0.361443204 |
| pcaac422.pcaec343                 | 0.051736168  | 0.056512164 | 0.361544458 |
| pcaac362.pcaec301                 | 0.057089526  | 0.062360842 | 0.361553116 |
| pcaac320.pcaac321                 | -0.021976008 | 0.024007601 | 0.361602073 |
| pcaac425.isoleucine               | -0.023263053 | 0.02541683  | 0.361662375 |
| lysopcac180.smc260                | -0.028240944 | 0.030855752 | 0.361664857 |
| c10.valine                        | -0.058968756 | 0.064430928 | 0.361681942 |
| c141oh.pcaac422                   | 0.024337593  | 0.026594982 | 0.361736676 |
| acetylmethionine.pcaec365         | -0.01385627  | 0.015143859 | 0.361811766 |
| pcaec382.smc261                   | 0.057644146  | 0.063000818 | 0.361812605 |
| pcaac366.pcaec402                 | 0.030528718  | 0.03336773  | 0.361842491 |
| glutamicacid.smc240               | 0.036888149  | 0.040322615 | 0.361890688 |
| pcaec360.asparticacid             | 0.063545266  | 0.069465774 | 0.361919175 |
| methioninesulfoxide.pcaac421      | 0.026901463  | 0.029409587 | 0.361947112 |
| h1.pcaac363                       | -0.012326353 | 0.013476603 | 0.361983269 |
| isoleucine.pcaac322               | 0.040473458  | 0.044251199 | 0.361993066 |
| pcaec406.pcaac321                 | -0.021348061 | 0.023340809 | 0.361996069 |
| pcaac386.asparticacid             | -0.041585193 | 0.045467504 | 0.362001506 |
| smc260.smc181                     | -0.010623479 | 0.011615767 | 0.362022178 |
| pcaac365.smc160                   | -0.058340883 | 0.063794454 | 0.362053891 |
| putrescine.c5                     | 0.00863357   | 0.009440767 | 0.362061506 |
| c142.smc202                       | -0.036164732 | 0.039549463 | 0.36210394  |
| smohc161.c0                       | -0.000557491 | 0.000609682 | 0.36211543  |
| pcaac404.pcaec342                 | 0.077031239  | 0.084248534 | 0.362148157 |
| pcaec406.lysopcac170              | 0.019558579  | 0.021392472 | 0.362179252 |
| pcaec403.pcaac405                 | -0.040963119 | 0.044814622 | 0.362292782 |
| putrescine.smc161                 | -0.05382959  | 0.058904345 | 0.362402469 |
| pcaac384.pcaec401                 | 0.019656607  | 0.02151195  | 0.362452025 |
| pcaec384.c142                     | 0.036716205  | 0.040184828 | 0.362488487 |
| ornithine.pcaec422                | -0.021292912 | 0.023305232 | 0.362503945 |
| pcaac320.c162                     | -0.059523322 | 0.065156541 | 0.36256179  |
| kynurenine.pcaec424               | -0.006356787 | 0.006959858 | 0.362662991 |
| pcaac360.pcaec445                 | 0.040494859  | 0.044342803 | 0.362729683 |
| pcaac344.pcaac403                 | -0.009796987 | 0.010731301 | 0.362880166 |
| pcaac425.smc240                   | 0.019922872  | 0.021822969 | 0.362882427 |
| smc241.asymmetricdimethylarginine | 0.03150522   | 0.034510892 | 0.362895408 |
| smohc222.pcaec322                 | -0.098825419 | 0.108261356 | 0.362929699 |
| pcaec342.pcaac344                 | 0.082112954  | 0.089965806 | 0.3629969   |
| smc181.lysopcac182                | -0.018234879 | 0.01998727  | 0.363200477 |

|                                   |              |             |             |
|-----------------------------------|--------------|-------------|-------------|
| pcaac365.alanine                  | -0.016944374 | 0.01857572  | 0.363277069 |
| c51dc.pcaac323                    | -0.097600364 | 0.107006854 | 0.363321156 |
| pcaec383.smc261                   | 0.063597237  | 0.069728307 | 0.363332959 |
| smc240.serine                     | -0.02288312  | 0.025091562 | 0.363378768 |
| c182.serotonin                    | 0.056089151  | 0.061513431 | 0.363465368 |
| smohc221.asymmetricdimethylargin: | 0.039598494  | 0.043441098 | 0.363609694 |
| smohc141.isoleucine               | 0.022687555  | 0.024890633 | 0.363638472 |
| pcaec363.transhydroxyproline      | 0.015981437  | 0.017535396 | 0.363695191 |
| alphaaminoadipicacid.pcaec383     | 0.032378986  | 0.03552794  | 0.36370294  |
| smc160.c101                       | -0.006333586 | 0.006950454 | 0.363765394 |
| smohc161.pcaac404                 | 0.004424128  | 0.004855183 | 0.363781253 |
| pcaac323.arginine                 | -0.022989985 | 0.025236258 | 0.363900602 |
| smc180.lysopcac182                | -0.021813082 | 0.023944911 | 0.363911544 |
| pcaac343.pcaac421                 | 0.019125076  | 0.020995664 | 0.363944838 |
| pcaac240.pcaac403                 | -0.012156032 | 0.013347502 | 0.364034837 |
| spermidine.lysopcac140            | 0.005334408  | 0.005857635 | 0.364065576 |
| alphaaminoadipicacid.lysopcac140  | 0.00077209   | 0.000848008 | 0.364171575 |
| smohc222.histidine                | 0.049730411  | 0.054633613 | 0.364287799 |
| lysopcac280.pcaac320              | -0.075351722 | 0.082782794 | 0.364297738 |
| smc181.pcaac322                   | 0.044878173  | 0.049314416 | 0.364398846 |
| lysopcac280.c4                    | -0.009387954 | 0.010317654 | 0.364477345 |
| pcaac365.pcaac402                 | 0.058689238  | 0.064512697 | 0.36456181  |
| c162.lysopcac280                  | -0.011846332 | 0.013022332 | 0.364581786 |
| c162.c101                         | -0.023502955 | 0.025838483 | 0.364625474 |
| pcaac364.lysopcac140              | 0.00116462   | 0.001280557 | 0.364702794 |
| acetylmethionine.spermidine       | 0.046546972  | 0.051187078 | 0.364762385 |
| c51dc.creatinine                  | 0.008326704  | 0.009156918 | 0.364770368 |
| acetylmethionine.smc261           | 0.019579376  | 0.021532004 | 0.364780748 |
| pcaec382.isoleucine               | -0.014921756 | 0.016410092 | 0.364786817 |
| c51dc.c141                        | 0.019484373  | 0.021428272 | 0.364797398 |
| c3.pcaec402                       | -0.041106678 | 0.045217197 | 0.364897077 |
| lysopcac161.pcaec421              | -0.001742433 | 0.001917158 | 0.365018909 |
| pcaac424.creatinine               | 0.013581775  | 0.01494646  | 0.365106848 |
| c2.pcaec361                       | -0.005573945 | 0.006134918 | 0.365177564 |
| pcaec380.isoleucine               | -0.018885426 | 0.020787926 | 0.365219747 |
| pcaec443.pcaac366                 | -0.054421361 | 0.059906124 | 0.365238957 |
| pcaec443.prolinr                  | -0.017016069 | 0.018736078 | 0.365368425 |
| pcaac344.histidine                | 0.043571695  | 0.047982647 | 0.365434809 |
| pcaac363.lysopcac204              | -0.011930031 | 0.013138929 | 0.365477328 |
| glycine.pcaec360                  | -0.005958731 | 0.00656283  | 0.365498237 |
| alphaaminoadipicacid.pcaec446     | -0.038529535 | 0.042453878 | 0.365703183 |
| pcaec384.smc241                   | 0.085226706  | 0.093924246 | 0.365789488 |
| lysopcac161.smc240                | 0.023284909  | 0.025662286 | 0.365810165 |
| pcaec363.creatinine               | 0.00414776   | 0.004571419 | 0.365828456 |
| pcaec402.smc161                   | 0.073443443  | 0.080954536 | 0.365884292 |

|                               |              |             |             |
|-------------------------------|--------------|-------------|-------------|
| pcaec444.pcaec424             | -0.007128364 | 0.007858083 | 0.365926761 |
| smc160.pcaec404               | -0.011006289 | 0.012133916 | 0.365963441 |
| pcaac321.smc161               | -0.026816679 | 0.029566346 | 0.365999282 |
| pcaec420.prolinr              | 0.02477124   | 0.027312597 | 0.366024166 |
| prolinr.pcaec420              | -0.019488618 | 0.021492552 | 0.366125065 |
| pcaac322.creatinine           | 0.007128404  | 0.007861677 | 0.366142591 |
| smc261.pcaec383               | 0.056208201  | 0.061990674 | 0.36614676  |
| pcaac386.ornithine            | -0.013642123 | 0.015045896 | 0.366157137 |
| c181.pcaac240                 | -0.014335794 | 0.015814547 | 0.366265983 |
| pcaec405.pcaec403             | -0.026452502 | 0.029190832 | 0.366425186 |
| pcaac383.pcaac422             | -0.022289175 | 0.02460338  | 0.366558382 |
| glutamicacid.pcaec362         | 0.021591083  | 0.023835923 | 0.366620836 |
| creatinine.pcaac323           | -0.062726488 | 0.069262538 | 0.366719734 |
| pcaec382.lysopcac180          | -0.0735003   | 0.08116964  | 0.366782527 |
| pcaec421.c14                  | 0.064823133  | 0.071607144 | 0.366916552 |
| smohc161.spermidine           | 0.046778514  | 0.051674948 | 0.366924566 |
| pcaec401.lysine               | 0.062756222  | 0.069329494 | 0.366954947 |
| c101.pcaec360                 | 0.004854882  | 0.005363952 | 0.367004405 |
| pcaec444.pcaec385             | -0.036821784 | 0.040691216 | 0.367103006 |
| lysopcac281.c51               | -0.059111455 | 0.065327791 | 0.367136537 |
| pcaac404.pcaec401             | 0.019899235  | 0.021994484 | 0.367192721 |
| c16.pcaec383                  | 0.05944173   | 0.0657008   | 0.367194723 |
| pcaec403.serine               | 0.074908562  | 0.08280835  | 0.367264524 |
| c8.pcaac381                   | -0.015314105 | 0.016929638 | 0.367279244 |
| pcaac342.smc181               | 0.009706467  | 0.010730892 | 0.367299705 |
| c4.pcaec401                   | 0.037073987  | 0.040989617 | 0.367332596 |
| smc260.pcaec321               | -0.03246172  | 0.03589075  | 0.367339694 |
| pcaec340.tyrosine             | 0.036313164  | 0.040150613 | 0.367358473 |
| lysopcac181.pcaac343          | 0.008796412  | 0.00972709  | 0.367412683 |
| pcaec321.smc160               | 0.066390302  | 0.07341559  | 0.36741958  |
| glycine.c5                    | 0.009171244  | 0.010143618 | 0.367508651 |
| pcaac403.pcaac300             | -0.047734148 | 0.052801084 | 0.367562574 |
| lysopcac181.pcaec445          | 0.040750187  | 0.045075992 | 0.367564802 |
| pcaec322.pcaac344             | -0.068024015 | 0.075245277 | 0.367566225 |
| c162.pcaac322                 | -0.034830804 | 0.038529644 | 0.367582187 |
| pcaac344.smc160               | 0.043867497  | 0.048538614 | 0.367706481 |
| pcaac362.pcaac344             | -0.036822844 | 0.040760038 | 0.367896438 |
| pcaec342.pcaac322             | 0.044509989  | 0.04926981  | 0.367903201 |
| pcaac281.creatinine           | 0.003794878  | 0.004202042 | 0.36805629  |
| pcaec380.pcaac322             | 0.057730965  | 0.06393748  | 0.368148748 |
| c8.smohc241                   | 0.064958872  | 0.071946677 | 0.368176853 |
| c3.c141                       | -0.035437774 | 0.039258095 | 0.36827639  |
| pcaec322.pcaec365             | 0.029319738  | 0.032483888 | 0.368326014 |
| alphaaminoadipicacid.pcaec405 | 0.024762149  | 0.027434628 | 0.368329108 |
| pcaac420.pcaac403             | -0.004823037 | 0.005344371 | 0.368400937 |

|                           |              |             |             |
|---------------------------|--------------|-------------|-------------|
| lysopcac160.pcaec361      | 0.00435814   | 0.004830164 | 0.368494021 |
| c0.pcaec301               | 0.052770267  | 0.058508752 | 0.368681797 |
| pcaec381.creatinine       | 0.009938015  | 0.011018908 | 0.36868992  |
| pcaec361.tryptophan       | 0.07021688   | 0.077854713 | 0.368694812 |
| pcaec342.pcaec382         | -0.012122807 | 0.013443182 | 0.368755812 |
| smohc241.lysopcac170      | 0.011648511  | 0.012917368 | 0.368761055 |
| histidine.lysine          | 0.082045568  | 0.090986144 | 0.368779189 |
| c10.pcaac421              | 0.038413768  | 0.042611136 | 0.368906784 |
| h1.smc161                 | 0.066775279  | 0.074072015 | 0.36890925  |
| pcaec341.pcaec343         | 0.050052751  | 0.055523421 | 0.368920043 |
| lysopcac181.pcaec340      | 0.033260446  | 0.036898211 | 0.368951895 |
| pcaec423.pcaac362         | -0.009350608 | 0.010373634 | 0.368967086 |
| histidine.pcaac384        | -0.055947657 | 0.062076051 | 0.369023265 |
| lysopcac203.asparagine    | 0.00900923   | 0.009997989 | 0.369114294 |
| smc241.pcaec424           | -0.00246253  | 0.002732993 | 0.369149356 |
| pcaac362.acetylmethionine | 0.022536409  | 0.025013861 | 0.369192359 |
| pcaec340.c51dc            | -0.09160083  | 0.101671254 | 0.369195387 |
| pcaec361.lysopcac203      | 0.018999578  | 0.021089135 | 0.369213009 |
| pcaac385.c162             | -0.048328025 | 0.053651561 | 0.369288307 |
| c182.histidine            | 0.056415679  | 0.062630286 | 0.369289692 |
| acetylmethionine.pcaec361 | -0.011846708 | 0.013154833 | 0.369403012 |
| pcaac383.pcaec401         | 0.032932845  | 0.036571652 | 0.3694334   |
| leucine.alanine           | 0.0095581    | 0.010614862 | 0.369463554 |
| histidine.pcaec401        | 0.018754496  | 0.02083195  | 0.369553401 |
| lysopcac203.pcaac405      | 0.02015323   | 0.022386342 | 0.369568724 |
| pcaac426.pcaac402         | 0.057293446  | 0.063649844 | 0.369627988 |
| c3.pcaac422               | 0.046178196  | 0.051306822 | 0.369678272 |
| c182.spermidine           | 0.050979932  | 0.056642844 | 0.369686667 |
| pcaec446.asparticacid     | 0.01809316   | 0.020104812 | 0.369730394 |
| c162.c3                   | 0.047746622  | 0.053056955 | 0.369745863 |
| pcaec380.pcaec365         | -0.028215456 | 0.031357768 | 0.369810046 |
| pcaec343.c162             | 0.063206119  | 0.070248556 | 0.369832243 |
| pcaec381.pcaac343         | 0.008320567  | 0.009248486 | 0.369875576 |
| pcaec381.lysopcac180      | -0.061666418 | 0.068543995 | 0.369878858 |
| asparticacid.pcaac360     | 0.055543369  | 0.061756483 | 0.370021302 |
| c4.pcaec380               | 0.034730834  | 0.038618216 | 0.370050585 |
| asparticacid.leucine      | -0.016683448 | 0.018551961 | 0.370080287 |
| pcaec421.pcaac344         | 0.073232285  | 0.081442163 | 0.370127202 |
| smohc222.smc160           | -0.154659766 | 0.172016041 | 0.370176512 |
| smc241.pcaac402           | -0.033914951 | 0.037721166 | 0.370179053 |
| creatinine.c8             | -0.050732899 | 0.056451467 | 0.370389595 |
| c2.pcaec445               | -0.054860703 | 0.061045446 | 0.370396566 |
| pcaac405.pcaac420         | -0.038224303 | 0.042534389 | 0.370406142 |
| smohc241.pcaec340         | 0.054836699  | 0.061027016 | 0.37046131  |
| lysopcac182.c5            | 0.00625271   | 0.006958627 | 0.370466191 |

|                           |              |             |             |
|---------------------------|--------------|-------------|-------------|
| pcaac404.pcaac364         | 0.046637769  | 0.051904447 | 0.370478849 |
| pcaac362.asparticacid     | 0.01124887   | 0.012521408 | 0.370563947 |
| pcaac366.leucine          | -0.009404577 | 0.010469276 | 0.370600316 |
| asparagine.leucine        | 0.005124597  | 0.005704887 | 0.370611292 |
| smohc161.pcaec343         | 0.036342227  | 0.040469113 | 0.370748373 |
| lysopcac140.phenylalanine | -0.025774934 | 0.0287057   | 0.370812555 |
| pcaac344.pcaac364         | 0.068031893  | 0.075780619 | 0.37089494  |
| leucine.pcaac381          | 0.018871562  | 0.021021423 | 0.37090447  |
| lysopcac180.smohc241      | 0.044628776  | 0.04971476  | 0.370922148 |
| pcaec423.c16              | 0.019060096  | 0.021234403 | 0.370971142 |
| pcaac300.pcaac425         | -0.073074522 | 0.081419519 | 0.371023394 |
| smc161.pcaec444           | 0.074125936  | 0.082591544 | 0.371026524 |
| c51.pcaac425              | -0.058969603 | 0.065704444 | 0.371027776 |
| smohc241.pcaac403         | -0.014664454 | 0.016344082 | 0.37116848  |
| c10.lysopcac203           | -0.006403182 | 0.007137807 | 0.371250092 |
| histidine.alanine         | 0.02845809   | 0.031726923 | 0.371308563 |
| prolinr.alanine           | 0.015143508  | 0.016884557 | 0.371353542 |
| lysopcac140.glutamine     | -0.009861513 | 0.01099607  | 0.371387333 |
| pcaac341.lysopcac170      | 0.009485776  | 0.010580692 | 0.371549015 |
| kynurenine.smc202         | 0.049247241  | 0.054938414 | 0.371607263 |
| lysopcac161.pcaac361      | -0.093793031 | 0.104642321 | 0.371654014 |
| pcaec364.pcaec405         | -0.037386518 | 0.041725704 | 0.371820748 |
| pcaec380.glutamine        | -0.008652776 | 0.009663228 | 0.372126102 |
| c5.pcaec341               | 0.05997693   | 0.066981491 | 0.372130273 |
| serotonin.asparticacid    | 0.035235093  | 0.039353198 | 0.372167625 |
| pcaac381.pcaec383         | 0.083519021  | 0.093280927 | 0.37217076  |
| spermidine.c16            | 0.084855389  | 0.094786627 | 0.372236831 |
| pcaec403.pcaec385         | -0.055692506 | 0.062211753 | 0.372245645 |
| leucine.pcaec342          | -0.066848766 | 0.074680577 | 0.372288014 |
| pcaac323.lysopcac140      | -0.000906423 | 0.001012684 | 0.372319603 |
| isoleucine.prolinr        | -0.034737177 | 0.038810663 | 0.372334414 |
| pcaac322.smc181           | 0.011328836  | 0.012658063 | 0.372362312 |
| pcaec406.pcaac406         | 0.042997508  | 0.048051143 | 0.372448461 |
| glutamicacid.lysopcac140  | 0.001273027  | 0.001422868 | 0.372521645 |
| asparticacid.pcaec363     | -0.02570198  | 0.028727253 | 0.372522095 |
| pcaac240.c51              | -0.088853307 | 0.09932494  | 0.372584874 |
| pcaac323.pcaec322         | -0.059122717 | 0.066096081 | 0.372625059 |
| pcaec385.pcaac380         | 0.053629098  | 0.059955431 | 0.372632417 |
| c14.pcaec300              | 0.041209948  | 0.046072999 | 0.372650397 |
| pcaac424.lysopcac161      | 0.044210746  | 0.04943287  | 0.37269821  |
| pcaec403.pcaac426         | 0.061275117  | 0.068528976 | 0.372810282 |
| smohc221.pcaac405         | -0.023652038 | 0.02645811  | 0.372920201 |
| pcaec401.creatinine       | 0.019144212  | 0.021416942 | 0.37295282  |
| c16.pcaac343              | 0.025087544  | 0.028065889 | 0.372953579 |
| smc240.pcaec342           | -0.072592185 | 0.081212163 | 0.37296516  |

|                                    |              |             |             |
|------------------------------------|--------------|-------------|-------------|
| c8.valine                          | -0.054410526 | 0.060890126 | 0.373110823 |
| lysopcac281.creatinine             | 0.004502789  | 0.005039348 | 0.373142397 |
| glycine.pcaac421                   | -0.010758371 | 0.012041257 | 0.373178157 |
| pcaac343.creatinine                | 0.004504548  | 0.00504196  | 0.373203252 |
| alanine.pcaec402                   | 0.039089755  | 0.043755049 | 0.373221965 |
| pcaec363.lysopcac203               | -0.02095317  | 0.023454865 | 0.37324169  |
| pcaec382.glutamine                 | -0.011158208 | 0.012490726 | 0.373252684 |
| ornithine.pcaec402                 | -0.02330089  | 0.026086704 | 0.373311375 |
| pcaac403.pcaec301                  | 0.057968952  | 0.064899669 | 0.373311729 |
| smc181.lysopcac140                 | -0.001013025 | 0.001134164 | 0.373321108 |
| pcaac402.pcaec384                  | -0.044323485 | 0.049624845 | 0.373331734 |
| pcaec422.c101                      | -0.029757414 | 0.033316927 | 0.373336651 |
| pcaac342.pcaac321                  | -0.024191702 | 0.027086173 | 0.373349246 |
| pcaec444.smc161                    | -0.043035917 | 0.048202622 | 0.373523016 |
| c8.creatinine                      | -0.007660548 | 0.00858159  | 0.373597985 |
| pcaec363.c101                      | -0.006107197 | 0.006842348 | 0.373658649 |
| pcaac424.prolinr                   | -0.017163593 | 0.0192304   | 0.373677168 |
| pcaac401.c16                       | 0.012683671  | 0.014211347 | 0.373688349 |
| lysopcac140.pcaec363               | 0.014034212  | 0.015727287 | 0.373771186 |
| pcaac362.c182                      | 0.03843748   | 0.043076396 | 0.373791646 |
| pcaec406.pcaec405                  | -0.056497155 | 0.063318401 | 0.373812382 |
| methionine.c141oh                  | -0.077081822 | 0.086401905 | 0.373886964 |
| c182.smc202                        | 0.038562682  | 0.043228119 | 0.373917419 |
| smc260.kynurenine                  | -0.002870308 | 0.003217771 | 0.373947643 |
| pcaac426.asymmetricdimethylarginir | -0.014830598 | 0.016627311 | 0.373987904 |
| pcaac384.pcaec383                  | -0.0430266   | 0.048242439 | 0.374019574 |
| c10.pcaac403                       | -0.002801482 | 0.003141218 | 0.374039309 |
| smohc161.isoleucine                | 0.017062914  | 0.019132354 | 0.374044785 |
| pcaac341.glutamine                 | -0.005419674 | 0.006078875 | 0.374192663 |
| pcaec420.spermidine                | 0.04587054   | 0.051453119 | 0.374223181 |
| h1.pcaec382                        | 0.007095413  | 0.007959191 | 0.374237883 |
| creatinine.c14                     | -0.030884292 | 0.034644709 | 0.374246677 |
| c181.smc181                        | -0.02089902  | 0.023443972 | 0.374253259 |
| pcaac405.lysopcac161               | -0.06054901  | 0.067930318 | 0.37430956  |
| pcaec384.pcaac405                  | -0.034658326 | 0.038886318 | 0.374345356 |
| methionine.c16                     | -0.019645719 | 0.022047095 | 0.374448676 |
| methioninesulfoxide.pcaec301       | 0.042057014  | 0.047198848 | 0.374459115 |
| pcaac425.asymmetricdimethylarginir | -0.019190814 | 0.021542166 | 0.374572069 |
| pcaac383.smc161                    | -0.034610546 | 0.038855299 | 0.374622349 |
| pcaec384.pcaac361                  | 0.027451127  | 0.030820423 | 0.374662499 |
| c142.smohc241                      | 0.046678205  | 0.052411917 | 0.374703593 |
| pcaec365.pcaac322                  | 0.041347306  | 0.046432255 | 0.374765738 |
| smc160.smohc241                    | -0.071968597 | 0.080821763 | 0.374779689 |
| lysopcac140.pcaac385               | 0.013230875  | 0.014860562 | 0.374846981 |
| pcaac240.pcaec383                  | -0.066871305 | 0.075110899 | 0.374865082 |

|                       |              |             |             |
|-----------------------|--------------|-------------|-------------|
| smohc221.creatinine   | 0.005031005  | 0.005650952 | 0.374869175 |
| pcaec383.pcaac385     | -0.02181166  | 0.024507211 | 0.37502081  |
| pcaac364.pcaac402     | 0.040135984  | 0.045097493 | 0.375035393 |
| smohc141.valine       | 0.060368213  | 0.067832116 | 0.37504478  |
| pcaec301.c16          | 0.018576444  | 0.020873633 | 0.375054001 |
| lysopcac182.pcaac321  | -0.017309342 | 0.019452525 | 0.375119758 |
| pcaec382.creatinine   | 0.007741737  | 0.008700382 | 0.375124707 |
| c141.lysopcac160      | 0.024455904  | 0.027485127 | 0.375140168 |
| pcaec405.tyrosine     | -0.055603034 | 0.062496636 | 0.375188529 |
| lysopcac280.threonine | -0.020979388 | 0.02358409  | 0.375263247 |
| smc202.pcaec340       | -0.015967321 | 0.017951152 | 0.375300497 |
| c51dc.pcaec343        | 0.040875016  | 0.045956142 | 0.375328288 |
| c181.pcaac343         | 0.018142388  | 0.020401738 | 0.375423766 |
| smohc221.pcaec423     | 0.018088462  | 0.020347218 | 0.375567012 |
| pcaec383.lysopcac180  | -0.054765423 | 0.061615854 | 0.375657598 |
| pcaac360.smc261       | 0.027161245  | 0.030559262 | 0.375665448 |
| glutamicacid.pcaac300 | -0.059000431 | 0.066384018 | 0.375682071 |
| c181.pcaac380         | 0.043376807  | 0.048816429 | 0.375791772 |
| smohc241.pcaac405     | -0.023062742 | 0.025960768 | 0.375899376 |
| c141.pcaec422         | 0.017840787  | 0.020087481 | 0.376014327 |
| lysopcac203.c141oh    | 0.102916767  | 0.115895657 | 0.376090544 |
| pcaac403.pcaac426     | 0.081984889  | 0.092324784 | 0.376094334 |
| pcaec380.lysopcac281  | 0.014845776  | 0.016718978 | 0.376118827 |
| c4.pcaac422           | 0.027593259  | 0.031076227 | 0.376139044 |
| pcaec341.c101         | -0.004079936 | 0.004597674 | 0.376423483 |
| arginine.asparticacid | -0.020255086 | 0.022829938 | 0.376517494 |
| c182.pcaec342         | -0.044902768 | 0.050615581 | 0.376561847 |
| c51dc.lysopcac140     | -0.000693513 | 0.00078181  | 0.376600474 |
| c141oh.c4             | -0.012613722 | 0.014221342 | 0.376656323 |
| pcaec402.lysopcac170  | 0.042808278  | 0.04826596  | 0.376673684 |
| pcaec381.pcaec405     | 0.098288079  | 0.11082302  | 0.376691164 |
| c141.c3               | 0.045329502  | 0.051112426 | 0.376709145 |
| smc241.lysopcac203    | -0.008424112 | 0.009499287 | 0.376732535 |
| pcaec421.smc261       | 0.05558226   | 0.06267755  | 0.376742306 |
| lysopcac160.tyrosine  | -0.041060458 | 0.046309275 | 0.376817221 |
| c162.kynurenine       | -0.004260662 | 0.004805919 | 0.376877676 |
| pcaec363.pcaac240     | -0.010002236 | 0.011287093 | 0.377081027 |
| pcaac380.pcaec340     | -0.032730181 | 0.036934726 | 0.377082653 |
| pcaac403.pcaac422     | -0.063470433 | 0.071639022 | 0.377183118 |
| pcaec301.pcaec384     | 0.028421913  | 0.032081313 | 0.377205738 |
| asparticacid.pcaec383 | 0.078770473  | 0.088940869 | 0.377358077 |
| serine.putrescine     | -0.014998765 | 0.016937847 | 0.377429061 |
| pcaec406.valine       | -0.058438775 | 0.066005871 | 0.377515312 |
| pcaac403.c51          | -0.09246292  | 0.104446591 | 0.37756482  |
| pcaac240.smc240       | 0.04331462   | 0.048929048 | 0.37757094  |

|                                    |              |             |             |
|------------------------------------|--------------|-------------|-------------|
| smc260.pcaec342                    | -0.055522814 | 0.062727807 | 0.377632686 |
| c142.pcaac300                      | -0.031426574 | 0.035510561 | 0.37771139  |
| pcaec383.pcaec445                  | 0.037332411  | 0.042188684 | 0.377765532 |
| c142.pcaec445                      | -0.037999634 | 0.042949311 | 0.377838735 |
| c10.pcaac240                       | -0.01350563  | 0.01526615  | 0.377880232 |
| pcaec405.c51dc                     | -0.09825884  | 0.111101103 | 0.378024845 |
| lysine.pcaec360                    | 0.004411987  | 0.004989408 | 0.378099339 |
| pcaac425.pcaec301                  | 0.044234018  | 0.050026654 | 0.378132508 |
| lysopcac140.taurine                | -0.047786988 | 0.054058618 | 0.378253182 |
| pcaec341.serotonin                 | 0.06609577   | 0.074771688 | 0.378262207 |
| lysopcac281.c5                     | -0.005664972 | 0.00640892  | 0.378288013 |
| asparticacid.pcaac343              | 0.011267637  | 0.012748683 | 0.378337696 |
| smohc161.kynurenine                | -0.003512151 | 0.003974015 | 0.378363821 |
| c51dc.glycine                      | -0.017623458 | 0.019944267 | 0.378441116 |
| c2.pcaec380                        | -0.033840337 | 0.038297133 | 0.378446215 |
| smohc241.pcaec422                  | -0.017295294 | 0.019573138 | 0.378447242 |
| c14.c102                           | 0.02045002   | 0.023144522 | 0.378471283 |
| alphaaminoadipicacid.transhydroxyp | -0.020019913 | 0.022657834 | 0.378473181 |
| pcaec360.glutamicacid              | -0.027383737 | 0.030996907 | 0.378549192 |
| pcaec301.glycine                   | 0.023175955  | 0.026234438 | 0.378558472 |
| pcaac424.pcaac323                  | -0.056465761 | 0.063929571 | 0.378648757 |
| pcaec380.pcaec363                  | 0.021165104  | 0.023963055 | 0.378654427 |
| pcaec364.transhydroxyproline       | -0.033688953 | 0.038142877 | 0.378658973 |
| pcaac406.c182                      | 0.021688602  | 0.024558113 | 0.378700028 |
| c8.lysopcac181                     | 0.05369141   | 0.060796923 | 0.378714646 |
| pcaec405.isoleucine                | -0.012440762 | 0.014089397 | 0.378789753 |
| pcaac401.pcaac322                  | 0.044668743  | 0.050599274 | 0.378893903 |
| pcaec420.pcaac403                  | -0.006639144 | 0.007521798 | 0.378969504 |
| c2.smc180                          | -0.004145728 | 0.004698297 | 0.379111908 |
| c102.pcaec424                      | 0.009398749  | 0.010651502 | 0.37911307  |
| lysopcac180.valine                 | -0.03224567  | 0.036549416 | 0.37918776  |
| methionine.pcaac406                | 0.045449354  | 0.051516181 | 0.379195316 |
| c8.pcaec362                        | 0.011537025  | 0.013079385 | 0.379280168 |
| smc180.pcaac380                    | -0.056061555 | 0.063556779 | 0.379283731 |
| creatinine.pcaec401                | 0.035998188  | 0.040814341 | 0.37932248  |
| c4.pcaec445                        | 0.062756286  | 0.071166724 | 0.379418339 |
| arginine.pcaac405                  | -0.037413949 | 0.042432989 | 0.379473419 |
| kynurenine.pcaac281                | 0.000862866  | 0.000978652 | 0.379490138 |
| c182.smc181                        | -0.017643531 | 0.020014754 | 0.379577032 |
| pcaac323.lysine                    | -0.045119664 | 0.051187325 | 0.379611851 |
| c141.c101                          | -0.011532019 | 0.013084652 | 0.379677762 |
| pcaac420.pcaac422                  | -0.037660466 | 0.042732656 | 0.379696781 |
| c3.pcaec384                        | 0.037081233  | 0.042078963 | 0.379736887 |
| smc240.pcaec340                    | 0.022728877  | 0.025794739 | 0.379783186 |
| citruiline.pcaec401                | 0.021166755  | 0.024023875 | 0.37982214  |



|                               |              |             |             |
|-------------------------------|--------------|-------------|-------------|
| smc181.pcaac281               | 0.001256707  | 0.001426486 | 0.379870839 |
| pcaec340.ornithine            | -0.028253803 | 0.032071242 | 0.379876937 |
| pcaec343.pcaec385             | -0.042637329 | 0.048413994 | 0.380032349 |
| pcaac360.c18                  | -0.034770707 | 0.039481869 | 0.380035927 |
| pcaec341.pcaac420             | 0.055121369  | 0.062595992 | 0.38008225  |
| pcaac240.pcaac406             | 0.038360413  | 0.043564847 | 0.380111108 |
| serine.pcaac343               | 0.010664512  | 0.012112356 | 0.380149083 |
| c181.c14                      | -0.028611702 | 0.03249642  | 0.380153675 |
| c182.tyrosine                 | -0.037797012 | 0.042930073 | 0.380167167 |
| methionine.pcaac366           | 0.027086526  | 0.030766764 | 0.380193809 |
| kynurenine.citruiline         | 0.03213179   | 0.036500728 | 0.380235491 |
| smc241.lysine                 | 0.040424064  | 0.045934566 | 0.380381009 |
| pcaac421.lysopcac160          | -0.013109748 | 0.014898077 | 0.380420646 |
| c51.pcaec421                  | 0.002468513  | 0.002805448 | 0.380454421 |
| lysopcac160.pcaac403          | 0.017484007  | 0.019871233 | 0.380473115 |
| smohc141.pcaac380             | -0.038532061 | 0.04379719  | 0.380517029 |
| alphaaminoadipicacid.leucine  | -0.010314653 | 0.011726786 | 0.380626824 |
| alanine.smc260                | 0.016936848  | 0.019257632 | 0.380677002 |
| pcaec383.smohc221             | -0.078914519 | 0.089736075 | 0.380720615 |
| pcaec340.c102                 | 0.020852062  | 0.023715826 | 0.380807098 |
| smc240.c16                    | 0.021057796  | 0.023951372 | 0.380837984 |
| pcaec403.prolinr              | -0.011553713 | 0.013141517 | 0.380845039 |
| lysopcac281.pcaec322          | 0.058333904  | 0.066351759 | 0.380853201 |
| lysopcac161.pcaac323          | -0.100616572 | 0.11446765  | 0.380942714 |
| pcaac341.asparticacid         | 0.037738925  | 0.042945251 | 0.381065591 |
| pcaec360.pcaec340             | -0.016835698 | 0.019158524 | 0.38107137  |
| ornithine.taurine             | -0.026390108 | 0.030037274 | 0.381168066 |
| lysopcac170.c142              | 0.025357675  | 0.028862274 | 0.381170002 |
| glycine.serotonin             | -0.066950114 | 0.076205098 | 0.381182674 |
| pcaac426.alphaaminoadipicacid | 0.012075677  | 0.013745239 | 0.381191572 |
| histidine.pcaec424            | -0.038251526 | 0.043545686 | 0.381252285 |
| pcaac426.pcaec401             | 0.023081172  | 0.026275829 | 0.381254687 |
| pcaac403.glutamine            | -0.014509659 | 0.016518451 | 0.381269476 |
| pcaec404.c51dc                | -0.098463894 | 0.112095978 | 0.381270497 |
| pcaec443.pcaec405             | 0.088688856  | 0.100973452 | 0.381297969 |
| ornithine.serine              | -0.017040504 | 0.019403362 | 0.381359634 |
| c51dc.c102                    | -0.025011849 | 0.028484153 | 0.381428466 |
| lysine.kynurenine             | -0.004000243 | 0.004555996 | 0.381471553 |
| pcaec322.transhydroxyproline  | -0.031906017 | 0.036344964 | 0.381553247 |
| pcaac380.lysopcac160          | 0.040551569  | 0.046199852 | 0.381620232 |
| pcaec300.pcaec446             | -0.041354633 | 0.047118938 | 0.381662204 |
| smc260.pcaac240               | -0.006657181 | 0.007586765 | 0.38176594  |
| pcaac360.lysine               | -0.079452114 | 0.090559165 | 0.381832315 |
| pcaac381.pcaec422             | -0.02478111  | 0.028246828 | 0.38185635  |
| arginine.pcaac322             | 0.033905603  | 0.038656391 | 0.381966629 |

|                                    |              |             |             |
|------------------------------------|--------------|-------------|-------------|
| c51.pcaec402                       | -0.014957143 | 0.01705372  | 0.381989209 |
| pcaec360.c101                      | -0.009327893 | 0.010635992 | 0.38201538  |
| pcaac425.smc261                    | 0.0524189    | 0.059774506 | 0.382052163 |
| pcaac402.pcaac380                  | 0.051614319  | 0.058857482 | 0.382055868 |
| citruLine.c3                       | -0.021558062 | 0.024583809 | 0.382064584 |
| lysopcac203.tyrosine               | -0.044417549 | 0.050653258 | 0.382079162 |
| pcaac366.pcaec361                  | -0.024267571 | 0.027675367 | 0.382094771 |
| ornithine.pcaac424                 | 0.019409531  | 0.022137493 | 0.382145377 |
| pcaac380.asparticacid              | -0.033905051 | 0.038678633 | 0.382247375 |
| pcaec301.tyrosine                  | 0.030695988  | 0.035017874 | 0.382248969 |
| lysopcac181.lysopcac182            | -0.040138254 | 0.045789591 | 0.382249091 |
| pcaac405.smc202                    | 0.020850864  | 0.023789359 | 0.382304187 |
| pcaec384.pcaec422                  | -0.038054447 | 0.04342465  | 0.3823831   |
| serotonin.pcaec401                 | 0.022510285  | 0.025690882 | 0.382456431 |
| h1.lysopcac170                     | -0.020522896 | 0.023424144 | 0.38248601  |
| smohc241.pcaec382                  | -0.013923304 | 0.015891685 | 0.382488801 |
| pcaac425.pcaac406                  | 0.047134515  | 0.053800226 | 0.382507828 |
| asymmetricdimethylarginine.pcaec36 | -0.002248628 | 0.002567176 | 0.382609469 |
| pcaac323.pcaec405                  | -0.044451885 | 0.050750627 | 0.382623839 |
| pcaec386.pcaac240                  | -0.01458851  | 0.016657101 | 0.382664558 |
| lysopcac281.pcaec362               | 0.010366955  | 0.011837892 | 0.382702431 |
| pcaac426.c162                      | -0.042270669 | 0.048269102 | 0.382710009 |
| pcaec363.pcaec382                  | -0.01731549  | 0.019773726 | 0.382735837 |
| pcaec386.asparticacid              | -0.030141055 | 0.03442205  | 0.382762649 |
| pcaac363.creatinine                | 0.004010083  | 0.004580073 | 0.382807131 |
| c51.smc240                         | -0.04190054  | 0.047856507 | 0.382809735 |
| asparticacid.putrescine            | -0.017393216 | 0.019868483 | 0.382879048 |
| pcaac380.lysopcac161               | -0.070845809 | 0.08093168  | 0.382900432 |
| serine.pcaec362                    | 0.013329585  | 0.015233112 | 0.383083565 |
| pcaec382.pcaec401                  | -0.070837838 | 0.080956864 | 0.383101425 |
| c3.c18                             | -0.027350986 | 0.031264584 | 0.38320114  |
| pcaac421.lysopcac161               | -0.058845828 | 0.067272971 | 0.383250584 |
| smc181.ornithine                   | -0.054642687 | 0.062468444 | 0.383254637 |
| pcaac321.c0                        | -0.000663411 | 0.000758489 | 0.383295603 |
| pcaec301.lysopcac181               | -0.023462955 | 0.026827731 | 0.383333934 |
| c8.c101                            | 0.017718811  | 0.020261735 | 0.383378505 |
| citruLine.c8                       | 0.03310476   | 0.037857182 | 0.383395766 |
| pcaac426.pcaac421                  | -0.017392269 | 0.019889696 | 0.383411131 |
| c0.c14                             | -0.028960855 | 0.033126251 | 0.383508327 |
| pcaec425.c14                       | -0.031859007 | 0.036442067 | 0.383519094 |
| pcaac383.pcaec341                  | -0.038951868 | 0.04455771  | 0.383545089 |
| pcaac384.glutamicacid              | -0.029453707 | 0.033693324 | 0.383555272 |
| kynurenine.pcaec420                | -0.040389543 | 0.046210024 | 0.383624472 |
| pcaec402.c51dc                     | -0.09981805  | 0.114208681 | 0.383649349 |
| pcaac422.smc260                    | -0.043423381 | 0.049685336 | 0.383665245 |

|                              |              |             |             |
|------------------------------|--------------|-------------|-------------|
| pcaac426.pcaec422            | 0.017997531  | 0.020594881 | 0.383710851 |
| c18.valine                   | -0.021727753 | 0.024867481 | 0.383787971 |
| kynurenine.pcaec444          | -0.091398655 | 0.104612842 | 0.383818787 |
| pcaec381.pcaec445            | 0.051379041  | 0.058812693 | 0.383862328 |
| glutamicacid.pcaac240        | -0.011202321 | 0.01282348  | 0.383876301 |
| pcaec382.pcaec362            | 0.011429176  | 0.01308518  | 0.38394935  |
| lysopcac204.methionine       | -0.03169515  | 0.036291631 | 0.384002762 |
| pcaec401.lysopcac281         | 0.01653238   | 0.018931508 | 0.38404225  |
| pcaac320.smc240              | 0.030882304  | 0.03536491  | 0.38405646  |
| pcaec421.smc240              | 0.029525925  | 0.033812635 | 0.384070265 |
| c8.pcaec341                  | 0.037806532  | 0.043297501 | 0.384092631 |
| c10.pcaec421                 | -0.00219445  | 0.002514046 | 0.384258005 |
| pcaac384.pcaec342            | -0.067872564 | 0.077759318 | 0.38426972  |
| pcaec405.pcaec385            | -0.05497079  | 0.06298308  | 0.384306537 |
| glutamicacid.c51             | -0.043900541 | 0.050306185 | 0.384371601 |
| pcaac320.lysopcac281         | 0.008126534  | 0.009312415 | 0.384377606 |
| lysopcac160.pcaac425         | -0.070321435 | 0.080600777 | 0.384480761 |
| pcaac321.smc260              | -0.018189213 | 0.020848874 | 0.384499524 |
| lysopcac280.smc161           | 0.067574064  | 0.077456917 | 0.384512048 |
| acetylnornithine.lysopcac181 | -0.042967093 | 0.049256667 | 0.384565409 |
| pcaac386.c3                  | 0.019790811  | 0.022688202 | 0.384573532 |
| pcaec381.pcaac380            | 0.036492036  | 0.041837286 | 0.384605096 |
| pcaec362.acetylnornithine    | 0.056720929  | 0.06504315  | 0.384706409 |
| putrescine.pcaac426          | -0.034265844 | 0.039300533 | 0.3847924   |
| serotonin.valine             | -0.043317638 | 0.049685715 | 0.384824888 |
| c162.pcaac364                | 0.027282343  | 0.031295244 | 0.384857532 |
| serine.pcaac426              | -0.024685738 | 0.028328307 | 0.385051599 |
| pcaec421.tyrosine            | -0.055217185 | 0.063371479 | 0.385100791 |
| pcaac424.phenylalanine       | -0.051865963 | 0.059525428 | 0.385101334 |
| lysopcac182.c51              | -0.044709299 | 0.051312852 | 0.385110305 |
| phenylalanine.pcaec420       | -0.030887147 | 0.035449556 | 0.385115438 |
| prolinr.tyrosine             | -0.058317935 | 0.066950367 | 0.38524401  |
| c3.pcaec382                  | 0.010519699  | 0.012078808 | 0.385320341 |
| h1.putrescine                | 0.020134567  | 0.023119064 | 0.385328172 |
| pcaec422.pcaec383            | -0.078828645 | 0.090513329 | 0.385328743 |
| pcaec443.c16                 | 0.013211002  | 0.015169579 | 0.385338887 |
| pcaac385.ornithine           | -0.016313938 | 0.018734818 | 0.385396604 |
| pcaac366.pcaec421            | 0.003446264  | 0.003958491 | 0.385495305 |
| c141.pcaac300                | -0.021856512 | 0.025106476 | 0.385521235 |
| pcaac405.ornithine           | -0.010619779 | 0.01219968  | 0.385551855 |
| pcaac323.serotonin           | 0.069943411  | 0.080352355 | 0.385572408 |
| pcaec365.smohc241            | -0.057063789 | 0.065562564 | 0.385619897 |
| pcaac380.pcaac240            | -0.012557549 | 0.014429418 | 0.385672922 |
| smc181.pcaac406              | 0.019594041  | 0.022516537 | 0.385709657 |
| pcaec425.c51                 | -0.064102466 | 0.073675704 | 0.385788155 |

|                            |              |             |             |
|----------------------------|--------------|-------------|-------------|
| pcaec365.c5                | -0.005617462 | 0.006456821 | 0.385819911 |
| pcaec425.pcaac240          | -0.013617535 | 0.015653715 | 0.385863821 |
| glycine.pcaac281           | 0.002082582  | 0.002394127 | 0.385892504 |
| prolinr.pcaac385           | 0.004225262  | 0.004859099 | 0.386063608 |
| pcaac425.c51dc             | -0.090548897 | 0.10414188  | 0.386107429 |
| c3.pcaac421                | 0.016865881  | 0.019397832 | 0.386109524 |
| pcaac322.serotonin         | 0.055295771  | 0.06359879  | 0.386123443 |
| c4.pcaec446                | -0.05221138  | 0.060053665 | 0.386142437 |
| pcaac381.pcaec403          | -0.030879266 | 0.035517666 | 0.386145824 |
| c8.lysopcac203             | -0.006247746 | 0.007186365 | 0.38615509  |
| serotonin.ornithine        | -0.054554375 | 0.062760411 | 0.386231715 |
| pcaac360.spermidine        | 0.045259823  | 0.052077988 | 0.386324578 |
| pcaec420.asparagine        | -0.003530948 | 0.004063629 | 0.386413356 |
| smohc221.pcaac386          | 0.010551401  | 0.012145457 | 0.386501674 |
| pcaec405.pcaac366          | -0.019545228 | 0.022498218 | 0.386505644 |
| lysopcac140.lysopcac170    | -0.014367912 | 0.016539289 | 0.386522877 |
| smc181.pcaec322            | 0.069022946  | 0.079459706 | 0.386555905 |
| lysopcac280.pcaac380       | 0.022675916  | 0.026109785 | 0.386648585 |
| smc161.smohc241            | -0.051003171 | 0.058727096 | 0.38665173  |
| c51dc.pcaec383             | 0.046368873  | 0.053394576 | 0.386683634 |
| lysine.smohc141            | -0.029599404 | 0.034090904 | 0.386776263 |
| arginine.c51               | -0.061574691 | 0.070922749 | 0.386806535 |
| smc181.histidine           | 0.043677847  | 0.050315124 | 0.386865428 |
| pcaac341.smc260            | -0.017918364 | 0.020643964 | 0.386928005 |
| pcaec300.pcaac405          | 0.025265445  | 0.02911545  | 0.387039021 |
| pcaec445.pcaac323          | -0.053382077 | 0.061538875 | 0.387210761 |
| pcaac321.lysopcac203       | 0.013924573  | 0.016053606 | 0.387250698 |
| pcaec383.pcaac300          | -0.045056831 | 0.051949698 | 0.387285214 |
| lysopcac160.pcaac343       | 0.022334008  | 0.025756554 | 0.387392792 |
| pcaac405.pcaec401          | 0.018192876  | 0.020981034 | 0.387397641 |
| c141oh.taurine             | -0.02378013  | 0.027433447 | 0.38755092  |
| pcaac406.lysopcac203       | -0.010295468 | 0.011879436 | 0.387641984 |
| lysopcac140.alanine        | 0.016993582  | 0.019608562 | 0.387654075 |
| pcaec361.pcaac421          | 0.012364202  | 0.014267762 | 0.387685637 |
| pcaec404.pcaec401          | -0.05874125  | 0.067785744 | 0.387691538 |
| pcaac363.pcaec301          | 0.057078249  | 0.065870767 | 0.387720846 |
| pcaec380.c2                | 0.060776646  | 0.070140514 | 0.387731896 |
| c141oh.transhydroxyproline | 0.020909701  | 0.024131539 | 0.387737333 |
| pcaac404.pcaac405          | -0.087363231 | 0.100844952 | 0.387833529 |
| pcaac322.pcaec300          | 0.007393918  | 0.008535063 | 0.387840717 |
| pcaec322.pcaec363          | -0.027481182 | 0.031723509 | 0.387855691 |
| glycine.c182               | 0.04464275   | 0.051536018 | 0.387871066 |
| lysopcac170.lysopcac181    | 0.066894222  | 0.077228417 | 0.38790224  |
| spermidine.c4              | -0.053961308 | 0.062299885 | 0.387919945 |
| smohc241.pcaec424          | -0.005243785 | 0.006054266 | 0.387932851 |

|                                    |              |             |             |
|------------------------------------|--------------|-------------|-------------|
| pcaac424.isoleucine                | -0.012157225 | 0.014038422 | 0.388006081 |
| pcaac383.asymmetricdimethylarginir | -0.021211881 | 0.02449556  | 0.388032642 |
| pcaac381.pcaec380                  | 0.064619371  | 0.074637808 | 0.388128473 |
| c181.pcaec402                      | -0.015087019 | 0.017427293 | 0.388161537 |
| pcaac386.serotonin                 | 0.076652354  | 0.088562673 | 0.3882691   |
| pcaac366.pcaac405                  | -0.044134389 | 0.051003264 | 0.388373285 |
| pcaac344.glutamine                 | -0.007676588 | 0.008876607 | 0.388654277 |
| pcaac343.c102                      | 0.030859086  | 0.035685369 | 0.388685151 |
| lysopcac160.pcaec444               | 0.124510067  | 0.144006943 | 0.388763394 |
| asparticacid.pcaec421              | -0.002773227 | 0.003207876 | 0.388821425 |
| pcaac403.pcaec361                  | 0.007336047  | 0.008485941 | 0.388827623 |
| c5.pcaec446                        | -0.058801374 | 0.068020683 | 0.388844588 |
| smc261.pcaec363                    | -0.019766763 | 0.022866074 | 0.388847359 |
| pcaac386.pcaac365                  | 0.050871184  | 0.058867413 | 0.389007511 |
| asymmetricdimethylarginine.pcaac32 | -0.020429087 | 0.023640626 | 0.389015021 |
| isoleucine.c101                    | 0.005201779  | 0.006019628 | 0.389023481 |
| smc161.pcaec365                    | 0.042179292  | 0.048811691 | 0.389030892 |
| pcaac385.pcaac281                  | 0.001387662  | 0.001606102 | 0.389101702 |
| lysopcac181.c142                   | 0.030944303  | 0.035817529 | 0.389129296 |
| smc261.asparagine                  | -0.008145754 | 0.009429697 | 0.389185404 |
| c12.pcaac240                       | -0.009715971 | 0.011247528 | 0.389190243 |
| c3.pcaec301                        | 0.039298901  | 0.045504721 | 0.389304751 |
| lysopcac181.pcaac364               | 0.036761965  | 0.042567638 | 0.389309952 |
| pcaec423.pcaac385                  | -0.015776914 | 0.018268533 | 0.389310821 |
| smc260.smc180                      | -0.007682143 | 0.008896844 | 0.389389209 |
| c14.pcaac405                       | 0.035332632  | 0.040928192 | 0.389490422 |
| lysopcac170.pcaec383               | 0.099592545  | 0.115365818 | 0.389494503 |
| spermidine.c141oh                  | 0.237526795  | 0.275184767 | 0.389561422 |
| pcaec362.smohc161                  | -0.016196567 | 0.018766133 | 0.389604993 |
| methionine.putrescine              | 0.025278563  | 0.029290924 | 0.389636453 |
| pcaec300.c101                      | -0.006603175 | 0.007652321 | 0.38970139  |
| pcaac360.pcaec361                  | -0.009805568 | 0.011365001 | 0.389762727 |
| pcaac365.pcaec360                  | 0.003943267  | 0.004571585 | 0.389886665 |
| smc240.pcaec444                    | -0.093678604 | 0.108638095 | 0.39002947  |
| smohc221.pcaec361                  | -0.012358304 | 0.014334411 | 0.390115735 |
| c102.pcaac384                      | 0.032719215  | 0.037955908 | 0.390176172 |
| pcaec380.pcaec401                  | -0.042760721 | 0.049606658 | 0.390196234 |
| pcaac384.smc241                    | 0.043918263  | 0.050961431 | 0.390306725 |
| pcaac402.pcaec404                  | 0.03512461   | 0.040763457 | 0.390375327 |
| pcaec381.histidine                 | -0.040127619 | 0.046571556 | 0.39039476  |
| pcaac424.pcaac366                  | -0.023397773 | 0.02716147  | 0.390505098 |
| pcaac421.pcaec322                  | 0.06011411   | 0.069793336 | 0.39056906  |
| kynurenine.pcaec341                | -0.035309354 | 0.040995158 | 0.390574794 |
| smohc222.smc260                    | -0.029636964 | 0.034410343 | 0.390588387 |
| c5.pcaac421                        | 0.020692324  | 0.024032827 | 0.390741043 |

|                                    |              |             |             |
|------------------------------------|--------------|-------------|-------------|
| pcaac320.c101                      | -0.007603542 | 0.008832182 | 0.390802478 |
| pcaac402.pcaec385                  | -0.06295639  | 0.073130701 | 0.390811039 |
| c16.pcaac385                       | -0.046084992 | 0.053537476 | 0.390852877 |
| pcaac240.citruline                 | -0.03141965  | 0.03650858  | 0.390956487 |
| pcaac321.glutamine                 | -0.008246827 | 0.009584773 | 0.391066714 |
| pcaec380.pcaac403                  | 0.007644622  | 0.008884892 | 0.391068029 |
| pcaec423.c14                       | -0.045993089 | 0.053462549 | 0.391134324 |
| lysopcac280.pcaac383               | -0.014997311 | 0.017433054 | 0.391137585 |
| pcaac422.lysopcac140               | 0.000829599  | 0.000964749 | 0.391339878 |
| pcaec402.pcaec405                  | -0.058138048 | 0.067613792 | 0.391371204 |
| kynurenine.pcaec403                | 0.025004993  | 0.02908146  | 0.391387116 |
| serotonin.c181                     | -0.011977059 | 0.013930451 | 0.391414894 |
| pcaec446.pcaac406                  | 0.026148137  | 0.030412792 | 0.391415459 |
| pcaac384.c2                        | 0.045032464  | 0.05238088  | 0.39144977  |
| pcaec405.glutamine                 | -0.008317515 | 0.009675524 | 0.39148652  |
| c18.pcaac426                       | 0.037126425  | 0.043196095 | 0.39157405  |
| c0.pcaac384                        | 0.051862411  | 0.060343441 | 0.391591472 |
| pcaac365.glutamine                 | -0.00675701  | 0.007862021 | 0.391593912 |
| kynurenine.pcaac320                | -0.037559265 | 0.043705939 | 0.3916415   |
| histidine.phenylalanine            | -0.022119507 | 0.025739843 | 0.391649205 |
| c102.serotonin                     | 0.015813556  | 0.018402208 | 0.391660013 |
| pcaac426.ornithine                 | -0.017066189 | 0.019861856 | 0.391706655 |
| pcaac240.pcaac300                  | -0.03569204  | 0.041539141 | 0.391709773 |
| smc181.c101                        | -0.023121017 | 0.026912078 | 0.39176866  |
| c14.smc181                         | -0.022904853 | 0.026663658 | 0.391825114 |
| smc260.pcaac425                    | -0.061139315 | 0.071174131 | 0.391835326 |
| lysopcac280.pcaec401               | 0.02610112   | 0.030386467 | 0.391856474 |
| pcaec386.c141oh                    | 0.074326892  | 0.086540006 | 0.391910725 |
| asymmetricdimethylarginine.c102    | 0.015610769  | 0.018176877 | 0.391936861 |
| c8.pcaec421                        | -0.002854851 | 0.003324173 | 0.391942515 |
| pcaac424.serine                    | 0.075657018  | 0.08810799  | 0.392014162 |
| kynurenine.asymmetricdimethylargir | -0.016972834 | 0.019769874 | 0.392104917 |
| c18.smc240                         | -0.032029553 | 0.037307918 | 0.392105562 |
| pcaac401.isoleucine                | -0.01250741  | 0.014570392 | 0.392163969 |
| c0.lysopcac204                     | 0.028697322  | 0.033433007 | 0.392196818 |
| pcaac341.asparagine                | 0.006022663  | 0.007017434 | 0.392257344 |
| pcaec383.pcaec382                  | 0.027484942  | 0.032029748 | 0.392332302 |
| pcaec406.ornithine                 | -0.014269727 | 0.016629569 | 0.39233953  |
| pcaec405.pcaac421                  | 0.013393792  | 0.015609685 | 0.392366975 |
| c181.pcaac320                      | -0.038713161 | 0.04512611  | 0.3924525   |
| smc261.c16                         | -0.028956134 | 0.033754455 | 0.392475618 |
| lysopcac140.arginine               | 0.037216128  | 0.043388966 | 0.392538211 |
| pcaec402.pcaac343                  | 0.011907974  | 0.013884572 | 0.392588767 |
| smc160.pcaac381                    | -0.02820011  | 0.032881655 | 0.39259772  |
| pcaac281.smohc141                  | 0.023784146  | 0.027733648 | 0.392615719 |

|                              |              |             |             |
|------------------------------|--------------|-------------|-------------|
| pcaac381.serine              | 0.036775048  | 0.042881839 | 0.392616513 |
| pcaac300.c5                  | -0.009179884 | 0.010705016 | 0.392649065 |
| lysopcac180.c14              | 0.023077586  | 0.026912676 | 0.392666897 |
| leucine.pcaac322             | 0.039174538  | 0.045687369 | 0.392694884 |
| c4.pcaac421                  | 0.013232697  | 0.015432712 | 0.39269664  |
| pcaac342.pcaac343            | -0.022487351 | 0.026228296 | 0.392737832 |
| c0.serotonin                 | 0.060256003  | 0.070284454 | 0.392767376 |
| pcaac404.lysine              | -0.054621896 | 0.063721454 | 0.392832529 |
| smohc241.h1                  | 0.004827203  | 0.005631839 | 0.392871403 |
| spermidine.histidine         | -0.02407036  | 0.028084701 | 0.392906778 |
| glutamicacid.putrescine      | -0.057073272 | 0.066592185 | 0.392910327 |
| pcaac404.glutamicacid        | -0.044039741 | 0.05140217  | 0.393069207 |
| pcaec406.lysopcac203         | -0.011385401 | 0.013289567 | 0.393097241 |
| pcaec444.lysine              | 0.056071471  | 0.06545662  | 0.39315063  |
| pcaac405.lysopcac160         | -0.01882134  | 0.021975511 | 0.393234094 |
| pcaac425.c16                 | 0.021512907  | 0.025118666 | 0.393243911 |
| smc160.smc260                | -0.030432484 | 0.035535274 | 0.39327086  |
| pcaec445.pcaec382            | -0.011308369 | 0.013204759 | 0.393279775 |
| lysopcac161.pcaac405         | 0.032308548  | 0.037728928 | 0.393308624 |
| pcaec363.pcaac366            | -0.013031043 | 0.015222236 | 0.393463188 |
| c141.pcaec421                | -0.001786027 | 0.002086449 | 0.39348557  |
| c0.pcaac240                  | -0.014845232 | 0.017345277 | 0.393566331 |
| pcaac363.c18                 | -0.022424506 | 0.026201366 | 0.393573726 |
| c181.histidine               | 0.050890833  | 0.059469088 | 0.393628784 |
| c141oh.pcaac383              | 0.005787403  | 0.006763174 | 0.393645183 |
| pcaac424.lysopcac140         | 0.001240578  | 0.001449825 | 0.393671823 |
| c162.pcaac323                | 0.047031525  | 0.054984017 | 0.393841341 |
| lysopcac182.lysopcac160      | 0.008288288  | 0.009690158 | 0.393861544 |
| pcaec424.isoleucine          | -0.010151486 | 0.011869035 | 0.393883043 |
| c2.phenylalanine             | -0.04087507  | 0.047796267 | 0.393936993 |
| glycine.pcaec341             | 0.029160065  | 0.034099999 | 0.39397002  |
| pcaac404.pcaac421            | 0.014795737  | 0.017302431 | 0.393975064 |
| c10.pcaac321                 | 0.017316345  | 0.020250601 | 0.393987197 |
| pcaac343.pcaec446            | -0.030792157 | 0.03601006  | 0.393989411 |
| pcaec343.serotonin           | 0.070808262  | 0.082812453 | 0.394019799 |
| c102.pcaac425                | -0.060599971 | 0.070878616 | 0.394053576 |
| pcaec343.pcaac322            | 0.039578767  | 0.046300578 | 0.394141916 |
| pcaac240.c0                  | -0.002793668 | 0.003268847 | 0.394245872 |
| pcaac365.creatinine          | 0.007398703  | 0.008657904 | 0.394286371 |
| smc180.c5                    | -0.003818233 | 0.004468103 | 0.394290257 |
| acetylmithoine.taurine       | -0.030346596 | 0.035513854 | 0.394319656 |
| smc202.pcaac323              | 0.103159122  | 0.120733908 | 0.394356354 |
| c16.c101                     | -0.006418805 | 0.007512587 | 0.394371244 |
| pcaec406.methioninesulfoxide | 0.019830565  | 0.023210226 | 0.39438097  |
| pcaec360.smc161              | -0.043510065 | 0.050934511 | 0.394465792 |

|                               |              |             |             |
|-------------------------------|--------------|-------------|-------------|
| pcaac363.c102                 | 0.027421307  | 0.032104132 | 0.394520495 |
| c0.pcaec383                   | 0.052995612  | 0.062056931 | 0.394604746 |
| pcaac403.smc202               | -0.061499825 | 0.072030996 | 0.394708051 |
| c14.kynurenine                | -0.003977845 | 0.004659797 | 0.394787942 |
| pcaec383.prolinr              | -0.015635254 | 0.01832015  | 0.394901879 |
| smc181.smohc161               | 0.017029931  | 0.019954445 | 0.394904795 |
| pcaac425.smc202               | -0.03117102  | 0.036524316 | 0.394909476 |
| smohc221.pcaec422             | 0.028511932  | 0.033410121 | 0.394931537 |
| pcaec300.methionine           | -0.023527719 | 0.027572272 | 0.394976395 |
| pcaac402.pcaec342             | 0.063650137  | 0.074593639 | 0.394986946 |
| c0.c51                        | -0.042385202 | 0.049673326 | 0.39499404  |
| c141.smohc241                 | 0.060593269  | 0.07102801  | 0.39509855  |
| pcaec403.c16                  | 0.013338956  | 0.015636973 | 0.395126318 |
| pcaec341.pcaec301             | -0.03124496  | 0.03663074  | 0.395164175 |
| lysopcac204.pcaec380          | -0.04717532  | 0.055308664 | 0.395177834 |
| pcaac421.lysopcac140          | 0.000883972  | 0.001036392 | 0.395185438 |
| pcaec341.c162                 | -0.04801339  | 0.056298712 | 0.395240539 |
| pcaec425.pcaac322             | 0.045783755  | 0.053684569 | 0.395242679 |
| c181.pcaec382                 | -0.00669849  | 0.007855348 | 0.395297389 |
| alphaaminoadipicacid.pcaac381 | 0.018090611  | 0.021216714 | 0.395336916 |
| pcaec342.pcaec363             | 0.085906444  | 0.10075625  | 0.395360101 |
| smc160.pcaec385               | -0.042355711 | 0.049681033 | 0.395395255 |
| pcaac401.lysopcac140          | 0.00123356   | 0.001446939 | 0.395407503 |
| smc160.pcaec424               | -0.003461368 | 0.00406013  | 0.395409892 |
| asparticacid.lysopcac161      | 0.054901822  | 0.064399636 | 0.395414799 |
| leucine.pcaac421              | 0.03121602   | 0.036620754 | 0.395472421 |
| pcaac404.lysopcac182          | -0.017960248 | 0.021070152 | 0.395478465 |
| pcaac321.pcaac281             | -0.005673507 | 0.006658306 | 0.395648671 |
| pcaec423.creatinine           | 0.009344908  | 0.010967121 | 0.395654529 |
| c18.asparticacid              | 0.011443271  | 0.013430542 | 0.395682506 |
| phenylalanine.pcaec364        | -0.013973396 | 0.016402482 | 0.395752223 |
| pcaec341.pcaec384             | -0.071498695 | 0.083930975 | 0.395770167 |
| pcaec405.pcaac322             | 0.058159669  | 0.068278909 | 0.395814106 |
| leucine.c101                  | 0.005513852  | 0.006473458 | 0.395832126 |
| pcaac342.pcaac341             | 0.011579759  | 0.013595503 | 0.39584785  |
| lysopcac280.leucine           | -0.016849338 | 0.019782785 | 0.395857442 |
| pcaac240.pcaec422             | -0.068630232 | 0.080580814 | 0.395870013 |
| pcaec425.pcaec340             | -0.01545814  | 0.018151112 | 0.395902359 |
| c102.pcaec341                 | 0.045558075  | 0.053502565 | 0.395970977 |
| c162.pcaec405                 | -0.018629337 | 0.021878322 | 0.395978965 |
| pcaec362.pcaec402             | -0.029370238 | 0.034508588 | 0.396199303 |
| c162.pcaac344                 | -0.028245179 | 0.033188588 | 0.396226128 |
| c3.glutamine                  | 0.011602271  | 0.013633937 | 0.396262796 |
| pcaec340.pcaec322             | -0.05084003  | 0.059743745 | 0.396271894 |
| alphaaminoadipicacid.c18      | -0.03238249  | 0.038057225 | 0.396315537 |



|                           |              |             |             |
|---------------------------|--------------|-------------|-------------|
| smc181.smc261             | 0.041035391  | 0.048234875 | 0.396397643 |
| pcaac343.pcaac322         | 0.08645452   | 0.101629084 | 0.396427712 |
| h1.creatinine             | -0.001393157 | 0.001637936 | 0.396499827 |
| smc240.pcaac405           | -0.018435017 | 0.021675704 | 0.396535484 |
| pcaec404.pcaec445         | 0.039241937  | 0.046143535 | 0.396568836 |
| smohc222.creatinine       | 0.004237153  | 0.004982663 | 0.396598021 |
| citruiline.creatinine     | 0.006415786  | 0.007545302 | 0.396640753 |
| pcaac380.pcaec382         | -0.010769572 | 0.012667267 | 0.396703346 |
| smc180.arginine           | -0.016121879 | 0.018962993 | 0.396710673 |
| lysopcac281.pcaec385      | -0.033230713 | 0.039087432 | 0.396717447 |
| glutamicacid.creatinine   | 0.008653054  | 0.010178495 | 0.396735532 |
| pcaac404.c102             | 0.018771918  | 0.022085583 | 0.396828844 |
| smc240.creatinine         | 0.005650028  | 0.006647807 | 0.396858758 |
| pcaec385.pcaac421         | -0.043258142 | 0.050903315 | 0.39691343  |
| pcaec343.creatinine       | 0.013021781  | 0.015324296 | 0.396948057 |
| acetylmithoine.isoleucine | 0.012758902  | 0.015015027 | 0.39695096  |
| smc261.pcaec340           | 0.040361077  | 0.047501141 | 0.396981829 |
| methionine.pcaac402       | -0.023965203 | 0.028210365 | 0.397075385 |
| pcaec382.pcaec445         | 0.068109093  | 0.080176851 | 0.397093071 |
| pcaec380.c141             | -0.050373825 | 0.059299655 | 0.397096689 |
| c51.pcaac385              | 0.037773072  | 0.044471237 | 0.397150535 |
| pcaac401.pcaac385         | -0.026981088 | 0.031767885 | 0.397185159 |
| pcaac401.pcaac380         | 0.042615726  | 0.050180559 | 0.397225012 |
| pcaec340.pcaac426         | 0.052300545  | 0.061586516 | 0.397239985 |
| creatinine.glutamicacid   | -0.036336564 | 0.042789445 | 0.397254488 |
| pcaec403.pcaec361         | 0.005396298  | 0.006354633 | 0.397256437 |
| pcaec444.pcaac385         | -0.012641575 | 0.014890128 | 0.397367705 |
| lysopcac281.c16           | 0.012229812  | 0.014405646 | 0.397384766 |
| asparagine.pcaac384       | -0.027810342 | 0.032758968 | 0.397396595 |
| pcaec402.smc261           | 0.044073387  | 0.051926888 | 0.397496289 |
| smc260.c101               | -0.032042364 | 0.037752579 | 0.397503024 |
| lysopcac280.histidine     | 0.042147031  | 0.049675082 | 0.397665083 |
| glutamine.c2              | 0.035648642  | 0.042023386 | 0.397747934 |
| c181.pcaec401             | -0.036588381 | 0.043131656 | 0.397753229 |
| pcaec385.pcaac403         | -0.001969916 | 0.002323039 | 0.397922119 |
| pcaec401.pcaec403         | 0.039315958  | 0.046365436 | 0.397940214 |
| kynurenine.lysopcac161    | 0.043361114  | 0.05114562  | 0.398029647 |
| pcaec443.pcaec445         | 0.047473609  | 0.056006983 | 0.398118401 |
| c182.pcaac405             | 0.041345443  | 0.048778649 | 0.398131613 |
| smc181.pcaac365           | -0.041083628 | 0.048476013 | 0.398192275 |
| pcaac365.ornithine        | -0.026107199 | 0.03080786  | 0.39823901  |
| pcaac424.c16              | 0.014635694  | 0.017271088 | 0.398244552 |
| c142.pcaac421             | 0.014983819  | 0.017682069 | 0.398249124 |
| pcaac320.pcaec340         | -0.055265472 | 0.065219521 | 0.398263361 |
| smc240.pcaec402           | -0.03053119  | 0.03603408  | 0.398313186 |

|                         |              |             |             |
|-------------------------|--------------|-------------|-------------|
| pcaac426.pcaac385       | -0.019726969 | 0.02328534  | 0.398370085 |
| lysopcac181.lysopcac180 | 0.080286851  | 0.094771574 | 0.398382472 |
| pcaac240.pcaac281       | -0.0026025   | 0.003072249 | 0.398417012 |
| lysopcac203.glutamine   | -0.008688712 | 0.010257645 | 0.39844592  |
| lysopcac181.c14         | 0.039327671  | 0.046433034 | 0.398485563 |
| pcaac404.pcaac380       | 0.029774405  | 0.035158745 | 0.398552105 |
| leucine.lysopcac160     | 0.014904033  | 0.017600931 | 0.398597142 |
| pcaec420.histidine      | 0.040254247  | 0.047544815 | 0.398661712 |
| c8.smc202               | -0.037885283 | 0.04474815  | 0.39867589  |
| pcaec421.pcaec382       | 0.017890192  | 0.021131028 | 0.398677069 |
| c142.pcaac341           | -0.003777333 | 0.004461608 | 0.398677575 |
| pcaec364.c5             | -0.006841319 | 0.008081274 | 0.398714327 |
| pcaec386.pcaac405       | -0.023846161 | 0.028170951 | 0.398760904 |
| methionine.leucine      | 0.007184334  | 0.008488408 | 0.398822343 |
| pcaec402.glutamine      | -0.019371722 | 0.022888083 | 0.398823881 |
| c10.c162                | -0.070889325 | 0.083762745 | 0.398855156 |
| smohc222.smohc241       | -0.109472655 | 0.129357706 | 0.398873127 |
| smohc141.phenylalanine  | -0.036759832 | 0.043440719 | 0.398913025 |
| pcaec380.pcaac300       | -0.042266845 | 0.04995367  | 0.398960761 |
| pcaac366.asparticacid   | -0.022856292 | 0.027017047 | 0.399030635 |
| smc260.lysopcac280      | 0.009130248  | 0.01079427  | 0.399115758 |
| pcaec403.glutamine      | -0.012793492 | 0.015125624 | 0.399130375 |
| lysopcac181.threonine   | 0.030520718  | 0.036084736 | 0.39913534  |
| h1.pcaac381             | 0.028097811  | 0.033231061 | 0.399290105 |
| pcaec402.creatinine     | 0.007898559  | 0.009341787 | 0.399301367 |
| h1.smohc221             | -0.041367937 | 0.048928282 | 0.399316509 |
| c14.c5                  | -0.003052039 | 0.003610049 | 0.399345641 |
| putrescine.pcaec362     | -0.008187682 | 0.009685748 | 0.399398875 |
| pcaec360.c18            | 0.032974802  | 0.039011541 | 0.399440815 |
| lysopcac180.pcaac322    | -0.065922425 | 0.077998575 | 0.399486908 |
| c141.lysopcac203        | -0.006452075 | 0.007634303 | 0.399504758 |
| pcaac365.lysopcac181    | 0.020798021  | 0.024610874 | 0.399542688 |
| pcaec360.glutamine      | -0.007545867 | 0.008929722 | 0.39956844  |
| c5.pcaec403             | 0.08231814   | 0.097428157 | 0.399633536 |
| c12.c101                | -0.017336858 | 0.020520861 | 0.399672762 |
| creatinine.alanine      | -0.013180492 | 0.015603384 | 0.399739872 |
| pcaec443.histidine      | -0.055238427 | 0.065402605 | 0.399811925 |
| lysopcac280.pcaac406    | -0.031192182 | 0.036934487 | 0.39984719  |
| lysopcac182.threonine   | 0.019138431  | 0.022663462 | 0.399883574 |
| creatinine.smc181       | -0.023148319 | 0.027413794 | 0.399915777 |
| pcaac240.asparticacid   | 0.046975615  | 0.055635663 | 0.399949441 |
| c16.smc180              | -0.01266955  | 0.015008027 | 0.400037774 |
| pcaac386.pcaec301       | 0.054724527  | 0.064828703 | 0.400062563 |
| serine.pcaac384         | -0.045946605 | 0.054436456 | 0.400117867 |
| pcaac384.pcaec380       | 0.029689493  | 0.035179944 | 0.400178409 |

|                                    |              |             |             |
|------------------------------------|--------------|-------------|-------------|
| pcaac343.pcaec341                  | -0.064143532 | 0.07601095  | 0.400211869 |
| citruline.pcaec386                 | 0.008913733  | 0.010563729 | 0.400249063 |
| pcaac362.creatinine                | 0.00350427   | 0.004153219 | 0.400281221 |
| pcaec380.pcaac404                  | -0.006438729 | 0.00763142  | 0.40030048  |
| pcaec420.smc202                    | -0.027575392 | 0.032685763 | 0.400334848 |
| pcaec300.putrescine                | 0.020008241  | 0.023716567 | 0.400341329 |
| pcaec406.pcaec445                  | 0.03302507   | 0.039150119 | 0.40039154  |
| pcaac422.c16                       | 0.014150181  | 0.016776385 | 0.400442444 |
| pcaec300.asparticacid              | -0.020914339 | 0.02479741  | 0.400470367 |
| pcaec365.smc202                    | -0.038696524 | 0.045882077 | 0.40048003  |
| c8.lysopcac160                     | 0.016347752  | 0.019383483 | 0.400482937 |
| pcaec365.c102                      | 0.015566607  | 0.018462906 | 0.400626076 |
| pcaac366.acetylmethionine          | -0.030682415 | 0.036400882 | 0.400751853 |
| c10.pcaec382                       | -0.009310448 | 0.01105138  | 0.400993668 |
| h1.c141                            | 0.012237136  | 0.014529046 | 0.401114134 |
| pcaac240.c8                        | -0.045666737 | 0.054228197 | 0.401187558 |
| acetylmethionine.smc161            | -0.064312754 | 0.076377935 | 0.401236884 |
| asymmetricdimethylarginine.pcaec34 | 0.033425249  | 0.039704272 | 0.401336139 |
| histidine.arginine                 | 0.017988296  | 0.021368609 | 0.401361711 |
| glutamicacid.pcaac421              | 0.01499458   | 0.017816902 | 0.401482426 |
| pcaec420.pcaec365                  | -0.014019787 | 0.016660236 | 0.401527694 |
| pcaec341.asparagine                | 0.005225637  | 0.006209851 | 0.401530054 |
| pcaec343.pcaec364                  | 0.011435364  | 0.013589776 | 0.401552123 |
| pcaac365.pcaac420                  | -0.046819697 | 0.055679407 | 0.401880433 |
| alphaaminoadipicacid.pcaec380      | 0.023038255  | 0.027402453 | 0.401960284 |
| pcaec301.pcaec403                  | -0.008241797 | 0.00980422  | 0.402015679 |
| pcaec425.pcaac404                  | -0.00617649  | 0.007348256 | 0.402071262 |
| serine.pcaec402                    | -0.030703492 | 0.036528924 | 0.402078365 |
| kynurenine.taurine                 | -0.036341461 | 0.043251361 | 0.402238639 |
| alanine.c2                         | -0.053291018 | 0.063431408 | 0.402295849 |
| histidine.pcaac402                 | -0.034982923 | 0.041640114 | 0.402301782 |
| pcaec341.pcaac366                  | -0.01032905  | 0.012295456 | 0.402332498 |
| pcaac425.pcaec422                  | 0.022736045  | 0.02706622  | 0.402363247 |
| smc240.lysopcac182                 | -0.036029583 | 0.042897013 | 0.402422817 |
| pcaac362.pcaec444                  | -0.079463809 | 0.094611339 | 0.402429292 |
| pcaec421.pcaac300                  | -0.042561306 | 0.050677019 | 0.402453391 |
| pcaec380.pcaec406                  | -0.021630832 | 0.025760045 | 0.402536906 |
| smohc222.pcaac320                  | 0.065170813  | 0.077612225 | 0.402540795 |
| pcaec401.acetylmethionine          | -0.024967127 | 0.029744673 | 0.402717621 |
| lysopcac160.glutamine              | -0.006912793 | 0.008237354 | 0.402818711 |
| glutamicacid.pcaac425              | -0.043902886 | 0.052329392 | 0.402946632 |
| pcaec422.smc261                    | 0.033045054  | 0.039396762 | 0.403056217 |
| lysopcac281.pcaec363               | 0.016797716  | 0.02002924  | 0.40312123  |
| pcaac401.lysopcac280               | 0.013285623  | 0.015841864 | 0.403132164 |
| pcaac323.pcaac403                  | -0.003592394 | 0.004284236 | 0.40320239  |

|                              |              |             |             |
|------------------------------|--------------|-------------|-------------|
| pcaec421.asparticacid        | 0.031715455  | 0.0378247   | 0.403218759 |
| pcaec404.glutamine           | -0.00858186  | 0.010234983 | 0.403220016 |
| lysine.pcaec422              | 0.033058869  | 0.039427608 | 0.403227299 |
| pcaec404.pcaac323            | -0.047326656 | 0.056448225 | 0.403261886 |
| pcaec404.pcaec385            | -0.055296561 | 0.065961042 | 0.4033104   |
| c51.pcaec406                 | -0.00757253  | 0.009034367 | 0.403383167 |
| pcaac342.pcaec384            | -0.01195655  | 0.014266838 | 0.40345345  |
| pcaec420.smohc141            | -0.019686546 | 0.023493438 | 0.403513065 |
| lysopcac140.glycine          | 0.035333107  | 0.042166117 | 0.403518185 |
| c101.pcaec382                | 0.015492478  | 0.018489274 | 0.403536744 |
| pcaec425.pcaec403            | -0.029252736 | 0.034916294 | 0.403604429 |
| lysopcac181.smc160           | -0.050364307 | 0.060120281 | 0.403643844 |
| pcaec362.pcaec364            | -0.009318381 | 0.011123935 | 0.403665261 |
| pcaec301.pcaac381            | 0.018706017  | 0.022330916 | 0.403673071 |
| kynurenine.pcaec363          | -0.018625027 | 0.022238336 | 0.403759623 |
| lysopcac170.acetylmethionine | -0.028005174 | 0.033441513 | 0.403805272 |
| c51dc.pcaac420               | -0.050959901 | 0.060863195 | 0.403890055 |
| pcaac385.alanine             | -0.013625929 | 0.016276087 | 0.403952363 |
| pcaec421.c0                  | -0.001425584 | 0.001702882 | 0.403961014 |
| pcaec341.c3                  | -0.03954766  | 0.047240646 | 0.403964411 |
| pcaec402.pcaec383            | 0.103506203  | 0.123656304 | 0.40402362  |
| lysopcac170.pcaac366         | 0.019601318  | 0.023417426 | 0.404027944 |
| pcaac240.pcaac323            | 0.096282921  | 0.115031402 | 0.404042262 |
| pcaec405.pcaac406            | 0.030900406  | 0.036933923 | 0.404251788 |
| pcaec300.pcaac386            | 0.007569443  | 0.009051548 | 0.404465121 |
| pcaac381.c141                | -0.035792311 | 0.042805029 | 0.404514918 |
| smc180.tyrosine              | -0.052718202 | 0.063050634 | 0.404540625 |
| pcaec402.lysopcac160         | -0.025707589 | 0.030746249 | 0.404542709 |
| pcaec341.smc160              | 0.071730255  | 0.085789957 | 0.404546248 |
| pcaec420.pcaec301            | 0.048663399  | 0.058202199 | 0.404549356 |
| pcaac361.creatinine          | 0.003505924  | 0.004193869 | 0.404630683 |
| pcaec386.pcaac361            | -0.061938513 | 0.074094612 | 0.404645293 |
| histidine.pcaec341           | 0.029540584  | 0.035339803 | 0.404666008 |
| pcaec343.c101                | -0.005793249 | 0.006932292 | 0.40478429  |
| c16.pcaec300                 | -0.015675326 | 0.018758109 | 0.404803523 |
| c51.pcaec362                 | 0.006251496  | 0.007481093 | 0.404812791 |
| smohc221.pcaec364            | -0.015127597 | 0.018103865 | 0.404834676 |
| pcaac300.pcaac240            | -0.023008691 | 0.027537075 | 0.40486114  |
| pcaac343.c18                 | -0.029232257 | 0.034987322 | 0.404885393 |
| pcaec321.pcaec382            | -0.013523276 | 0.016188246 | 0.404960402 |
| smc240.c2                    | 0.034811637  | 0.041675845 | 0.405005804 |
| pcaac381.pcaac380            | 0.041801872  | 0.050052537 | 0.405081755 |
| phenylalanine.pcaec380       | 0.037460727  | 0.04485889  | 0.405127024 |
| alanine.smc261               | 0.014066829  | 0.01684591  | 0.405155001 |
| c182.lysopcac140             | -0.000729255 | 0.000873348 | 0.405165256 |

|                              |              |             |             |
|------------------------------|--------------|-------------|-------------|
| c141.c162                    | -0.072109026 | 0.08635872  | 0.405174748 |
| smc202.c16                   | 0.025090549  | 0.030067218 | 0.405462233 |
| pcaec382.asparticacid        | 0.051466746  | 0.061675168 | 0.405462824 |
| leucine.arginine             | 0.043530674  | 0.052170491 | 0.405512324 |
| pcaac360.asparticacid        | -0.026580921 | 0.031859037 | 0.405548015 |
| pcaec405.lysopcac161         | 0.039177922  | 0.04696527  | 0.405626533 |
| creatinine.pcaec421          | -0.01404019  | 0.016832998 | 0.405683739 |
| pcaec365.c162                | 0.050452697  | 0.060512704 | 0.405871052 |
| lysopcac140.lysopcac161      | 0.0736742    | 0.08837371  | 0.405920105 |
| c3.phenylalanine             | 0.020163851  | 0.024187405 | 0.405928875 |
| c51.pcaac421                 | 0.01039896   | 0.01247617  | 0.406010352 |
| pcaec342.pcaac365            | 0.02594985   | 0.031133967 | 0.406019236 |
| pcaac344.serine              | -0.029247288 | 0.035090806 | 0.406028008 |
| pcaac405.pcaec383            | -0.037485405 | 0.044982844 | 0.406110985 |
| smc161.lysopcac170           | 0.005976714  | 0.007173756 | 0.406218164 |
| smc261.pcaec365              | 0.023511421  | 0.028226075 | 0.406312469 |
| pcaec341.c102                | 0.017256605  | 0.020725305 | 0.40650001  |
| smohc221.pcaac300            | 0.03902816   | 0.04687585  | 0.406527481 |
| smc240.pcaec364              | -0.014503442 | 0.017419958 | 0.40653282  |
| pcaac363.methionine          | -0.020995437 | 0.025222373 | 0.406624426 |
| pcaac422.pcaac385            | 0.035682042  | 0.042866195 | 0.406628967 |
| c12.pcaec341                 | 0.056014717  | 0.067307599 | 0.406733207 |
| c3.pcaec446                  | -0.060693206 | 0.072935882 | 0.406775454 |
| lysopcac161.lysopcac204      | -0.028397225 | 0.034130074 | 0.406840297 |
| smc202.lysopcac180           | 0.028832566  | 0.034661163 | 0.406946438 |
| c14.pcaec401                 | -0.025060472 | 0.03012923  | 0.406988408 |
| pcaec365.pcaac320            | 0.046608522  | 0.056036595 | 0.406996628 |
| spermidine.lysopcac182       | -0.041617588 | 0.050036301 | 0.406998649 |
| c2.lysopcac170               | 0.00993704   | 0.01194955  | 0.407091564 |
| c162.pcaac426                | 0.030417798  | 0.036582305 | 0.407144114 |
| pcaac384.lysopcac161         | -0.047040837 | 0.056574242 | 0.407144559 |
| c0.pcaec444                  | -0.034874702 | 0.041953269 | 0.407264786 |
| h1.pcaac421                  | 0.015651711  | 0.018829444 | 0.407286726 |
| pcaec401.pcaac300            | -0.038591074 | 0.046426411 | 0.407289517 |
| pcaec424.pcaec362            | 0.006537371  | 0.007865036 | 0.40731035  |
| c0.pcaec445                  | -0.034906016 | 0.041995123 | 0.407311404 |
| pcaac343.pcaec340            | -0.034842524 | 0.041919193 | 0.407316498 |
| glutamine.smohc221           | 0.045996088  | 0.055341133 | 0.407342189 |
| smc181.pcaac402              | -0.037916492 | 0.045625978 | 0.407403473 |
| pcaac360.transhydroxyproline | 0.04855471   | 0.05842872  | 0.407415293 |
| smc240.putrescine            | 0.0154701    | 0.018619134 | 0.407492141 |
| pcaac422.pcaac361            | -0.036213834 | 0.043586836 | 0.407507748 |
| c16.smohc141                 | 0.027423776  | 0.033008246 | 0.407523218 |
| pcaec405.pcaec321            | -0.024485333 | 0.029475321 | 0.407584964 |
| phenylalanine.pcaac405       | -0.02697681  | 0.03247994  | 0.407662616 |

|                              |              |             |             |
|------------------------------|--------------|-------------|-------------|
| arginine.pcaac404            | -0.005837879 | 0.007028787 | 0.407663355 |
| c16.pcaac422                 | 0.02110193   | 0.025408178 | 0.407691397 |
| pcaac406.smc181              | 0.019322077  | 0.023265542 | 0.407700019 |
| smc161.pcaac420              | 0.047971582  | 0.057763199 | 0.40770846  |
| pcaac425.pcaac405            | -0.042495047 | 0.051171575 | 0.407733521 |
| pcaac405.pcaec322            | -0.045818157 | 0.055187307 | 0.407853181 |
| pcaec423.lysine              | 0.06277925   | 0.075648805 | 0.408051715 |
| pcaac342.pcaac320            | -0.050850202 | 0.061285771 | 0.408138955 |
| methioninesulfoxide.pcaac343 | 0.010875854  | 0.01310966  | 0.408204722 |
| pcaac341.pcaac361            | 0.049077863  | 0.059173909 | 0.408330209 |
| glutamicacid.pcaac381        | 0.014897079  | 0.017961756 | 0.408333506 |
| c181.pcaec404                | -0.009797331 | 0.011814244 | 0.408387854 |
| phenylalanine.pcaac385       | 0.019745669  | 0.023810929 | 0.408394669 |
| asparticacid.lysopcac203     | 0.005853323  | 0.007058421 | 0.408395319 |
| smc241.pcaec382              | -0.006946701 | 0.008378677 | 0.4084941   |
| pcaec424.pcaac240            | -0.011025717 | 0.013299102 | 0.408514139 |
| pcaac366.glutamine           | -0.007746976 | 0.009344601 | 0.408528202 |
| pcaac341.pcaec380            | -0.040887173 | 0.049319564 | 0.408532079 |
| lysopcac180.kynurenine       | -0.005466555 | 0.006594085 | 0.408541449 |
| pcaec381.isoleucine          | -0.01328924  | 0.016031433 | 0.408575183 |
| pcaac422.pcaac381            | 0.028330631  | 0.03417906  | 0.408609277 |
| creatinine.pcaec385          | 0.022439343  | 0.027074582 | 0.408660686 |
| pcaac421.smc161              | 0.069905403  | 0.08436436  | 0.408764702 |
| smc180.pcaac362              | -0.028885744 | 0.034860808 | 0.408770741 |
| smohc141.pcaac300            | 0.046288476  | 0.055864649 | 0.40878183  |
| serotonin.c14                | 0.03114119   | 0.037586504 | 0.408816848 |
| lysopcac181.pcaec405         | -0.023788531 | 0.028714314 | 0.408853538 |
| pcaac401.pcaec362            | 0.006165849  | 0.007442624 | 0.408856115 |
| c162.histidine               | 0.040261295  | 0.048598956 | 0.408862554 |
| pcaec340.pcaac425            | 0.068226685  | 0.082381331 | 0.409008191 |
| lysopcac180.acetylornithoine | -0.029291085 | 0.035370197 | 0.40903778  |
| leucine.pcaac344             | 0.046037404  | 0.055593765 | 0.409052026 |
| pcaac402.tyrosine            | -0.040549087 | 0.048971258 | 0.409100353 |
| pcaac426.pcaac240            | -0.010281224 | 0.012416984 | 0.409112311 |
| smc241.pcaec445              | 0.040065848  | 0.04839628  | 0.409183708 |
| arginine.leucine             | 0.021423848  | 0.025881085 | 0.409234657 |
| smc260.phenylalanine         | -0.033998492 | 0.041072686 | 0.409243751 |
| creatinine.c162              | 0.074067598  | 0.089482873 | 0.409263335 |
| c141.valine                  | -0.046162388 | 0.055775331 | 0.409308768 |
| creatinine.c16               | -0.013327623 | 0.016110121 | 0.409515534 |
| pcaac342.phenylalanine       | -0.023242371 | 0.028098568 | 0.409577558 |
| smohc141.creatinine          | 0.003463474  | 0.004187293 | 0.409596552 |
| pcaec343.tyrosine            | -0.037498751 | 0.045339509 | 0.409638071 |
| lysopcac180.c2               | -0.041656033 | 0.050371093 | 0.409684812 |
| pcaac385.c4                  | -0.014786106 | 0.017880621 | 0.409712047 |

|                                  |              |             |             |
|----------------------------------|--------------|-------------|-------------|
| ornithine.pcaac322               | 0.031189681  | 0.037719282 | 0.409737539 |
| pcaec424.lysopcac160             | -0.017884536 | 0.021628858 | 0.409741212 |
| pcaac363.pcaac422                | -0.01149093  | 0.013897128 | 0.409756241 |
| c181.lysine                      | 0.042912524  | 0.051905228 | 0.409817726 |
| pcaac366.c2                      | 0.058479881  | 0.070737808 | 0.409837156 |
| alphaaminoadipicacid.pcaac281    | -0.00189934  | 0.00229751  | 0.409847463 |
| smohc241.asymmetricdimethylargin | 0.016351752  | 0.019783329 | 0.409933912 |
| c4.smc180                        | -0.012326365 | 0.014914768 | 0.409983791 |
| c16.taurine                      | -0.054542903 | 0.066001043 | 0.410017215 |
| pcaec404.lysopcac170             | -0.01217476  | 0.014732996 | 0.410036705 |
| pcaac365.smc240                  | 0.026946578  | 0.032618006 | 0.410169099 |
| lysopcac160.c18                  | 0.048436373  | 0.058631501 | 0.410175115 |
| c141oh.pcaac240                  | -0.008301102 | 0.010049206 | 0.410214458 |
| methioninesulfoxide.pcaec385     | -0.054639214 | 0.06616969  | 0.410385051 |
| pcaec321.smc181                  | 0.037515296  | 0.045433661 | 0.410400862 |
| kynurenine.c141oh                | 0.085362671  | 0.103390911 | 0.410449238 |
| pcaec301.pcaec363                | 0.034276134  | 0.04151758  | 0.410477014 |
| pcaec403.pcaec321                | -0.030425222 | 0.036859197 | 0.410554325 |
| c3.pcaac381                      | 0.013540086  | 0.016406849 | 0.410652828 |
| smc261.pcaec420                  | 0.018669731  | 0.022625373 | 0.410710784 |
| c162.pcaac320                    | -0.039383092 | 0.047730033 | 0.410736847 |
| smc202.pcaec365                  | 0.01881405   | 0.022803164 | 0.410770035 |
| pcaec421.prolinr                 | -0.013042995 | 0.015809222 | 0.410791904 |
| pcaec342.pcaec384                | -0.05480504  | 0.066429602 | 0.410800495 |
| pcaec380.pcaac420                | -0.060177491 | 0.072942074 | 0.410803592 |
| spermidine.lysopcac160           | -0.04051689  | 0.049117946 | 0.410868145 |
| pcaac383.smc241                  | 0.015755297  | 0.019102968 | 0.410943523 |
| pcaac322.c14                     | 0.03575687   | 0.043354629 | 0.410945402 |
| c5.transhydroxyproline           | -0.031777468 | 0.038539391 | 0.411063153 |
| pcaec360.pcaac420                | 0.091540009  | 0.111021321 | 0.411073771 |
| pcaec446.pcaec424                | -0.010000065 | 0.012128909 | 0.411099023 |
| serotonin.pcaec402               | -0.020196283 | 0.024496081 | 0.411105718 |
| pcaec341.pcaec361                | -0.006842    | 0.008300459 | 0.411206566 |
| c10.smc261                       | 0.04316846   | 0.052372341 | 0.411224191 |
| pcaec340.pcaec384                | 0.070601237  | 0.085660267 | 0.411258237 |
| leucine.methioninesulfoxide      | 0.011669912  | 0.014160035 | 0.41129007  |
| pcaec423.glutamine               | -0.008205881 | 0.009958268 | 0.411356526 |
| pcaac321.serotonin               | 0.061355159  | 0.074461626 | 0.41138106  |
| pcaac341.pcaac323                | -0.04414292  | 0.053573105 | 0.411385705 |
| pcaec340.pcaac323                | -0.056341698 | 0.068394185 | 0.411496888 |
| c142.smohc222                    | -0.003163244 | 0.003839966 | 0.411502778 |
| pcaac381.phenylalanine           | 0.030316663  | 0.036805226 | 0.411538604 |
| lysine.pcaec363                  | 0.021086339  | 0.025599743 | 0.411545405 |
| pcaac385.lysopcac203             | -0.007191787 | 0.008732085 | 0.411595569 |
| asparticacid.pcaac321            | 0.014167971  | 0.017203682 | 0.411630605 |

|                              |              |             |             |
|------------------------------|--------------|-------------|-------------|
| isoleucine.alanine           | 0.007825527  | 0.009504436 | 0.41173693  |
| pcaec420.pcaec425            | -0.053161765 | 0.064577513 | 0.411811266 |
| lysopcac181.acetylornithoine | -0.023185444 | 0.02816472  | 0.411819955 |
| pcaac385.glutamine           | -0.00474739  | 0.005767001 | 0.41182536  |
| pcaec363.pcaac405            | -0.028216995 | 0.034286863 | 0.411956327 |
| pcaac383.lysopcac140         | -0.001175783 | 0.001428791 | 0.411982709 |
| pcaec423.pcaac320            | -0.076508293 | 0.092977082 | 0.412010448 |
| pcaac405.smc241              | 0.019309623  | 0.023466896 | 0.412025979 |
| pcaec444.pcaec422            | 0.035148244  | 0.042726485 | 0.412145892 |
| c16.pcaac364                 | 0.054290717  | 0.065998269 | 0.412160315 |
| pcaec384.lysopcac281         | 0.020759698  | 0.025236601 | 0.412163398 |
| pcaec425.isoleucine          | -0.008216643 | 0.009990353 | 0.412245644 |
| histidine.pcaec340           | 0.024550422  | 0.029854697 | 0.412317877 |
| pcaac322.c101                | -0.005165596 | 0.006281736 | 0.412323795 |
| lysopcac161.pcaec343         | 0.064571935  | 0.078524412 | 0.412325591 |
| pcaac361.lysopcac170         | 0.005161792  | 0.006277476 | 0.412350983 |
| c0.c12                       | -0.022248211 | 0.027058405 | 0.412375197 |
| pcaec446.smc160              | -0.064908426 | 0.078948959 | 0.412416244 |
| smohc221.pcaec322            | -0.074029918 | 0.090046904 | 0.412433623 |
| pcaec404.lysopcac204         | -0.048663001 | 0.059202997 | 0.412523027 |
| smc241.pcaec341              | 0.067508985  | 0.082136905 | 0.41255733  |
| pcaec342.pcaec444            | -0.070077055 | 0.085272831 | 0.41261968  |
| pcaec364.pcaec340            | 0.052084719  | 0.063386199 | 0.412672863 |
| ornithine.asparagine         | 0.012039435  | 0.014653639 | 0.412731897 |
| c12.pcaec423                 | 0.026142789  | 0.031820976 | 0.412755717 |
| phenylalanine.pcaec425       | -0.047918163 | 0.058328969 | 0.412779933 |
| pcaac322.pcaec421            | -0.004357322 | 0.005304181 | 0.412795537 |
| c12.smc261                   | -0.026264484 | 0.031978834 | 0.412897586 |
| lysopcac180.citruline        | 0.025628721  | 0.031211485 | 0.412998186 |
| c2.pcaac384                  | 0.059664981  | 0.072663924 | 0.413010889 |
| pcaac405.smc180              | 0.022467234  | 0.027363601 | 0.413036969 |
| pcaac384.c16                 | 0.022965543  | 0.02797156  | 0.413054484 |
| pcaac240.pcaac420            | 0.073213344  | 0.089173118 | 0.413058502 |
| pcaac421.pcaec402            | -0.0568905   | 0.06929838  | 0.413101022 |
| c182.smc240                  | -0.025050643 | 0.030515695 | 0.413123612 |
| c14.histidine                | 0.035173758  | 0.042847801 | 0.413129396 |
| pcaec363.smc260              | 0.024849836  | 0.030276285 | 0.413203748 |
| pcaac380.c101                | -0.02067998  | 0.025196421 | 0.413214125 |
| pcaec402.pcaec361            | 0.012408325  | 0.015123149 | 0.41336468  |
| smc181.pcaec364              | 0.022347534  | 0.02723699  | 0.413365143 |
| pcaec404.creatinine          | 0.008402631  | 0.010241529 | 0.413386621 |
| h1.pcaac426                  | -0.032230646 | 0.039287319 | 0.41342296  |
| methioninesulfoxide.pcaec401 | 0.029730968  | 0.036242206 | 0.413446762 |
| pcaec301.pcaac406            | -0.045975558 | 0.056057519 | 0.413555423 |
| pcaac406.smc260              | -0.019876899 | 0.024235842 | 0.413558222 |



|                           |              |             |             |
|---------------------------|--------------|-------------|-------------|
| pcaac364.serotonin        | 0.06691754   | 0.081595684 | 0.413577263 |
| pcaec363.pcaac362         | -0.007581962 | 0.009245323 | 0.413591465 |
| pcaec405.smc202           | -0.047327293 | 0.057717416 | 0.413650193 |
| pcaec421.pcaac385         | -0.025086672 | 0.030594585 | 0.41365697  |
| lysopcac181.kynurenine    | -0.00434076  | 0.005294977 | 0.413760691 |
| pcaec364.lysopcac181      | 0.021150821  | 0.025809934 | 0.413933844 |
| smohc161.tyrosine         | -0.050624391 | 0.061781139 | 0.413972898 |
| c141oh.c142               | 0.035775448  | 0.043664038 | 0.414018708 |
| pcaac406.smc161           | 0.043792703  | 0.053454118 | 0.414062251 |
| arginine.pcaac425         | -0.056756449 | 0.069327239 | 0.41439386  |
| kynurenine.c162           | -0.077394111 | 0.094559994 | 0.414512675 |
| lysopcac182.pcaec360      | -0.006830925 | 0.008348395 | 0.414645585 |
| pcaec421.pcaac404         | -0.007893255 | 0.009650566 | 0.414831163 |
| glutamine.pcaec424        | -0.012708715 | 0.015538635 | 0.414846806 |
| pcaec363.smc241           | 0.015135257  | 0.018508635 | 0.414925419 |
| methionine.h1             | -0.001752347 | 0.002143047 | 0.414954314 |
| c102.smohc161             | 0.007625077  | 0.009327078 | 0.415050567 |
| ornithine.histidine       | -0.035300378 | 0.043182335 | 0.415077765 |
| lysopcac180.glutamine     | -0.007594326 | 0.009290663 | 0.415110667 |
| smohc222.lysopcac182      | -0.015555038 | 0.01903074  | 0.415139736 |
| lysopcac160.pcaec382      | -0.005401678 | 0.006608919 | 0.415158116 |
| lysopcac182.pcaec402      | -0.016477815 | 0.020166019 | 0.415285425 |
| lysopcac203.alanine       | 0.036641661  | 0.044844626 | 0.415301161 |
| pcaec383.asparagine       | 0.008075151  | 0.009883406 | 0.415323384 |
| phenylalanine.lysopcac181 | 0.02762156   | 0.033807104 | 0.415327422 |
| pcaac320.lysopcac204      | -0.010097936 | 0.012359284 | 0.415328446 |
| pcaac380.smc202           | -0.026411324 | 0.032326214 | 0.415332676 |
| pcaec382.pcaec384         | -0.028479685 | 0.034859331 | 0.415353255 |
| pcaec380.pcaec340         | -0.043047887 | 0.052690956 | 0.415353651 |
| pcaac323.pcaac363         | 0.013637686  | 0.016693032 | 0.415364695 |
| lysopcac280.c101          | -0.010710993 | 0.013111965 | 0.415411294 |
| c16.asparagine            | 0.007891044  | 0.00966037  | 0.415434073 |
| pcaec380.pcaec343         | 0.048765764  | 0.059702311 | 0.415452067 |
| pcaac425.c102             | 0.022232212  | 0.027221663 | 0.415511916 |
| c0.glutamine              | 0.016668925  | 0.020410629 | 0.415529932 |
| c141.transhydroxyproline  | 0.015808584  | 0.019360235 | 0.415603678 |
| pcaec402.c51              | -0.046862317 | 0.05739184  | 0.415613056 |
| pcaec404.tyrosine         | -0.044999106 | 0.055123922 | 0.415730697 |
| lysopcac181.pcaac320      | -0.042917469 | 0.0525753   | 0.415742946 |
| asparagine.kynurenine     | -0.006856734 | 0.008400369 | 0.415778731 |
| pcaec364.ornithine        | -0.026925558 | 0.032987919 | 0.41578852  |
| pcaac361.pcaac420         | -0.038509214 | 0.047188824 | 0.415878789 |
| c181.pcaac300             | -0.019045032 | 0.023338534 | 0.415897391 |
| pcaac323.pcaac425         | -0.060027284 | 0.073562224 | 0.415912696 |
| pcaac425.lysopcac182      | -0.00997156  | 0.01222052  | 0.415934568 |

|                          |              |             |             |
|--------------------------|--------------|-------------|-------------|
| pcaac364.c162            | -0.044272436 | 0.054263652 | 0.415987067 |
| c51.pcaac281             | 0.00152766   | 0.001872532 | 0.416015979 |
| pcaec402.arginine        | -0.028788743 | 0.035288221 | 0.416020758 |
| pcaec422.pcaec445        | 0.039021161  | 0.047831704 | 0.416029964 |
| c142.lysopcac203         | -0.008347217 | 0.010232911 | 0.416074733 |
| alanine.lysine           | -0.040609802 | 0.049793046 | 0.416160768 |
| citruline.smc260         | 0.011095417  | 0.013605851 | 0.416208158 |
| isoleucine.pcaac385      | 0.049893825  | 0.061187378 | 0.416243453 |
| pcaac421.smohc241        | -0.049644237 | 0.060891564 | 0.416321876 |
| smohc241.smc180          | -0.012596621 | 0.015452194 | 0.416373072 |
| pcaec402.pcaec422        | -0.043185921 | 0.052996891 | 0.416557301 |
| phenylalanine.asparagine | 0.005632665  | 0.006912364 | 0.416562085 |
| glycine.c16              | -0.029229448 | 0.035872025 | 0.416586284 |
| c0.glycine               | -0.024041792 | 0.029510878 | 0.416671931 |
| lysopcac204.pcaec420     | 0.015951426  | 0.019581868 | 0.416714016 |
| pcaac321.pcaec364        | -0.012553453 | 0.015411957 | 0.416756802 |
| pcaec424.lysopcac180     | 0.037120295  | 0.045575699 | 0.416786051 |
| pcaac344.pcaec405        | -0.027875147 | 0.034230131 | 0.416860395 |
| pcaac365.pcaac384        | 0.048405847  | 0.059444095 | 0.416881276 |
| smc260.lysopcac170       | 0.01072807   | 0.013174555 | 0.416884963 |
| asparticacid.pcaac385    | 0.023859396  | 0.029302062 | 0.416911066 |
| c12.pcaac420             | 0.066739488  | 0.081975034 | 0.416975279 |
| pcaec363.putrescine      | 0.018052701  | 0.022174099 | 0.416980695 |
| pcaac321.pcaec406        | -0.02762967  | 0.033937717 | 0.416984045 |
| lysopcac160.pcaac300     | -0.027621066 | 0.033933354 | 0.417069039 |
| pcaec321.pcaec343        | 0.066256692  | 0.081402597 | 0.417092748 |
| lysopcac280.pcaac365     | -0.045742134 | 0.056204766 | 0.417144328 |
| lysopcac181.smc180       | 0.00942651   | 0.011584884 | 0.417234262 |
| smc160.lysopcac280       | 0.005962412  | 0.007328105 | 0.417265243 |
| c51dc.pcaac425           | -0.059665413 | 0.073338654 | 0.417308627 |
| pcaec321.pcaec401        | 0.039125225  | 0.048094451 | 0.417338417 |
| methionine.serotonin     | 0.071988806  | 0.088493723 | 0.417348443 |
| c141oh.c8                | 0.040742352  | 0.050090489 | 0.417414427 |
| pcaec300.citruline       | 0.024474981  | 0.030093627 | 0.417460429 |
| pcaec321.pcaac365        | -0.031307225 | 0.03849789  | 0.417503415 |
| pcaac366.pcaac361        | -0.024847339 | 0.030555063 | 0.41751511  |
| smc202.pcaec362          | 0.024941916  | 0.030675667 | 0.417580264 |
| c12.c2                   | 0.033883719  | 0.041674161 | 0.417592665 |
| pcaec322.smc260          | -0.023546175 | 0.028971723 | 0.41778322  |
| lysopcac204.pcaec341     | 0.027458817  | 0.033786419 | 0.41779004  |
| c12.c3                   | 0.029889557  | 0.036778226 | 0.417801765 |
| lysopcac204.pcaac405     | 0.030189039  | 0.037157812 | 0.417940294 |
| smc202.putrescine        | 0.028069988  | 0.03455346  | 0.417992126 |
| c12.pcaac320             | -0.059182327 | 0.072852776 | 0.417997218 |
| c3.c4                    | 0.008375069  | 0.010310151 | 0.418021354 |

|                       |              |             |             |
|-----------------------|--------------|-------------|-------------|
| smc260.smc161         | 0.058890188  | 0.072499293 | 0.418036535 |
| pcaec364.pcaac343     | -0.012490427 | 0.015377025 | 0.418041021 |
| lysopcac180.pcaac420  | -0.043683907 | 0.053780848 | 0.418052931 |
| pcaac380.lysopcac170  | 0.017280777  | 0.021276254 | 0.41808044  |
| c2.c141               | -0.03274586  | 0.040318786 | 0.418100912 |
| citruline.pcaac404    | 0.006464977  | 0.007960153 | 0.418104591 |
| pcaac322.asparticacid | -0.033305908 | 0.041011056 | 0.418131525 |
| smc260.smc261         | 0.019391361  | 0.023878395 | 0.418149888 |
| pcaec322.c101         | -0.00658919  | 0.008114627 | 0.418192348 |
| pcaac361.pcaac343     | 0.010929775  | 0.013460496 | 0.418206547 |
| pcaac422.prolinr      | -0.024918704 | 0.030692007 | 0.418259992 |
| pcaec422.pcaec301     | 0.057394034  | 0.070696392 | 0.418292781 |
| pcaec301.lysopcac161  | -0.057847769 | 0.071264014 | 0.418349616 |
| pcaec420.pcaec421     | 0.002041359  | 0.002514947 | 0.418377186 |
| pcaac322.pcaec341     | -0.054586234 | 0.067275463 | 0.418552618 |
| pcaac401.leucine      | -0.031291126 | 0.038565216 | 0.418553709 |
| lysopcac281.pcaac403  | -0.015996604 | 0.019718092 | 0.418620526 |
| pcaec405.pcaec322     | 0.049615679  | 0.061164501 | 0.41866691  |
| smc161.lysopcac280    | 0.00829104   | 0.010221833 | 0.418708886 |
| serine.valine         | -0.035793162 | 0.044128727 | 0.418710552 |
| arginine.pcaac240     | 0.010182678  | 0.012559093 | 0.4188975   |
| lysopcac160.pcaac386  | -0.015390723 | 0.018983667 | 0.418924011 |
| pcaec405.smohc222     | -0.006810009 | 0.008401556 | 0.419021212 |
| pcaec422.pcaac420     | -0.072618077 | 0.089605392 | 0.419103877 |
| creatinine.smc160     | -0.051337031 | 0.063347221 | 0.419111807 |
| pcaac406.methionine   | -0.022576934 | 0.027860435 | 0.419139704 |
| isoleucine.c8         | -0.018705368 | 0.0230836   | 0.419155045 |
| pcaac320.pcaec403     | 0.048444703  | 0.059790165 | 0.41920437  |
| isoleucine.creatinine | 0.007904235  | 0.009758914 | 0.419373349 |
| smohc161.pcaec342     | -0.078265477 | 0.096640787 | 0.419425256 |
| c5.methionine         | 0.056901404  | 0.07026837  | 0.419475116 |
| pcaac405.pcaac425     | -0.047340382 | 0.058465319 | 0.419506798 |
| pcaac425.glycine      | -0.01665295  | 0.020568312 | 0.4195505   |
| prolinr.pcaec383      | -0.025245068 | 0.031181874 | 0.419569929 |
| serine.pcaac360       | -0.025368588 | 0.031335072 | 0.419579252 |
| pcaec361.c16          | 0.020043674  | 0.02476047  | 0.41962963  |
| pcaec445.smc202       | -0.038813676 | 0.04794804  | 0.419634457 |
| pcaec421.methionine   | -0.031757256 | 0.039232389 | 0.419651227 |
| pcaac421.pcaac404     | 0.004907805  | 0.006063256 | 0.419669232 |
| c141oh.pcaec406       | -0.006204164 | 0.007665076 | 0.419684774 |
| c14.smc180            | -0.005951575 | 0.007353618 | 0.419723143 |
| c12.pcaec384          | -0.022533538 | 0.027842125 | 0.41972728  |
| pcaac383.lysopcac203  | 0.011050159  | 0.0136535   | 0.419729904 |
| smc161.c18            | -0.01619535  | 0.020013022 | 0.419779972 |
| lysopcac140.pcaec445  | 0.046308527  | 0.057229967 | 0.419822894 |

|                                 |              |             |             |
|---------------------------------|--------------|-------------|-------------|
| pcaec424.h1                     | 0.002506755  | 0.003098245 | 0.419867063 |
| asparagine.c16                  | -0.037140232 | 0.045911285 | 0.419942815 |
| alphaaminoadipicacid.pcaec362   | 0.007114351  | 0.008795097 | 0.41997542  |
| lysine.c102                     | 0.018640038  | 0.023045734 | 0.42001641  |
| lysopcac182.pcaec342            | -0.047843252 | 0.059161475 | 0.420096004 |
| c5.lysopcac203                  | 0.072818663  | 0.090058512 | 0.420164087 |
| pcaec322.c3                     | 0.029955056  | 0.037051978 | 0.420227284 |
| pcaec321.smohc141               | 0.022161233  | 0.027417475 | 0.420325788 |
| kynurenine.pcaec401             | 0.019144646  | 0.023685627 | 0.420330071 |
| lysopcac170.pcaec402            | -0.016634663 | 0.020580306 | 0.420330351 |
| smc241.creatinine               | 0.004214409  | 0.005214828 | 0.420400226 |
| ornithine.lysopcac203           | 0.010457645  | 0.012942419 | 0.420483787 |
| pcaec420.pcaec446               | 0.032774815  | 0.04057114  | 0.420585619 |
| pcaec406.h1                     | -0.001778017 | 0.002201    | 0.420593365 |
| lysopcac161.c101                | -0.006265733 | 0.007756937 | 0.420629854 |
| smc261.lysopcac281              | -0.009380973 | 0.011615278 | 0.420697424 |
| pcaec424.creatinine             | 0.006591498  | 0.008161855 | 0.420721974 |
| pcaec321.c12                    | 0.029699355  | 0.036774922 | 0.42072199  |
| c142.pcaec361                   | -0.008083829 | 0.010010044 | 0.420737071 |
| isoleucine.pcaec384             | -0.042001508 | 0.052033908 | 0.42095336  |
| lysopcac170.lysopcac203         | -0.021603938 | 0.026766476 | 0.420992526 |
| smohc221.pcaec385               | -0.016025713 | 0.019857498 | 0.421044696 |
| c51dc.asparagine                | 0.007328263  | 0.009084087 | 0.421229327 |
| c5.c101                         | 0.015236389  | 0.018889056 | 0.421280501 |
| pcaec342.smc181                 | 0.00925657   | 0.011477332 | 0.421347341 |
| alanine.smc161                  | 0.066402146  | 0.082346323 | 0.421423317 |
| pcaec384.pcaec422               | 0.020017372  | 0.024829502 | 0.421528746 |
| pcaec422.methionine             | -0.033721566 | 0.04183164  | 0.421567368 |
| pcaec301.smc161                 | -0.046992298 | 0.058295618 | 0.421580235 |
| phenylalanine.lysopcac203       | 0.005801193  | 0.00719718  | 0.421618421 |
| pcaec364.pcaec401               | 0.04224586   | 0.052414017 | 0.421637893 |
| pcaec361.pcaec341               | -0.005422176 | 0.006727486 | 0.421654852 |
| asymmetricdimethylarginine.c101 | 0.00511515   | 0.006347229 | 0.421704492 |
| pcaec366.c51                    | -0.085561212 | 0.106178379 | 0.421740137 |
| lysopcac280.tyrosine            | -0.036071644 | 0.044763728 | 0.421741361 |
| kynurenine.pcaec380             | -0.031649964 | 0.039286453 | 0.421857891 |
| c2.c101                         | -0.00910501  | 0.011301892 | 0.421859107 |
| lysopcac170.pcaec344            | 0.035333431  | 0.043859147 | 0.421862985 |
| pcaec365.pcaec321               | -0.016639337 | 0.020656681 | 0.421916469 |
| pcaec421.pcaec301               | 0.056020591  | 0.069557425 | 0.421992464 |
| glutamine.acetylorithoine       | 0.017094894  | 0.021227085 | 0.422022457 |
| pcaec381.pcaec362               | 0.007764848  | 0.009642759 | 0.422069798 |
| pcaec383.pcaec422               | 0.046999745  | 0.058389877 | 0.422254979 |
| pcaec401.pcaec364               | 0.006762187  | 0.008401644 | 0.42229232  |
| pcaec341.putrescine             | 0.021526656  | 0.026746766 | 0.42231109  |

|                              |              |             |             |
|------------------------------|--------------|-------------|-------------|
| pcaec422.c16                 | 0.014634245  | 0.01818496  | 0.422361532 |
| pcaac342.pcaac402            | 0.044211317  | 0.054946199 | 0.422427806 |
| glutamine.pcaac424           | -0.00870201  | 0.010816673 | 0.422502341 |
| pcaac362.c4                  | -0.008221139 | 0.0102205   | 0.422572699 |
| smohc241.pcaac366            | -0.011210243 | 0.013937762 | 0.422613076 |
| pcaec424.pcaac385            | -0.028298634 | 0.035184915 | 0.422626917 |
| serine.smc240                | 0.037200071  | 0.046253122 | 0.422633579 |
| c162.prolinr                 | 0.022030667  | 0.02739512  | 0.422685026 |
| lysopcac161.creatinine       | 0.003224988  | 0.00401089  | 0.42275649  |
| pcaec382.pcaac426            | 0.066222604  | 0.082366448 | 0.422790004 |
| pcaec421.pcaec380            | 0.078096299  | 0.097145322 | 0.422840457 |
| pcaec381.c4                  | -0.014676696 | 0.018256638 | 0.422841585 |
| pcaec321.pcaec383            | -0.038025268 | 0.047301005 | 0.422847547 |
| c181.c51dc                   | 0.066210373  | 0.082369733 | 0.422893933 |
| pcaec443.glutamine           | -0.008817199 | 0.010969348 | 0.422903019 |
| lysopcac170.pcaec380         | 0.022042793  | 0.027423355 | 0.422907079 |
| c18.lysopcac161              | -0.059237776 | 0.073700339 | 0.42292495  |
| pcaac401.pcaec340            | -0.033840589 | 0.042104282 | 0.422943718 |
| pcaec420.pcaac361            | -0.034764602 | 0.043255657 | 0.422962142 |
| pcaac364.asparticacid        | 0.04271203   | 0.053150989 | 0.423021253 |
| pcaac361.lysine              | 0.045627782  | 0.056787609 | 0.423088461 |
| smc160.tyrosine              | -0.039821197 | 0.049570137 | 0.423175369 |
| pcaec446.pcaec445            | -0.122686613 | 0.152750125 | 0.423259078 |
| pcaec362.c101                | -0.012239988 | 0.015239566 | 0.423266778 |
| pcaec421.pcaac422            | -0.123715452 | 0.154069378 | 0.423374091 |
| pcaec385.asparagine          | 0.021630703  | 0.026939458 | 0.423401624 |
| glutamicacid.pcaec446        | -0.056838218 | 0.070805852 | 0.42351927  |
| smohc161.pcaac420            | 0.0464759    | 0.057898887 | 0.423533868 |
| glycine.creatinine           | 0.009651961  | 0.012024334 | 0.423537163 |
| pcaec386.pcaac320            | 0.064949268  | 0.080914922 | 0.423546592 |
| pcaac424.pcaac425            | 0.091076388  | 0.113465147 | 0.423549064 |
| pcaec383.transhydroxyproline | 0.047402884  | 0.059056448 | 0.423555321 |
| pcaec404.pcaac421            | 0.012351937  | 0.015393219 | 0.423695701 |
| pcaec404.putrescine          | -0.046371953 | 0.057798672 | 0.423768195 |
| creatinine.lysopcac281       | -0.01062302  | 0.013243099 | 0.423852475 |
| pcaac383.c4                  | -0.014437378 | 0.018000722 | 0.423916303 |
| pcaec402.pcaec364            | 0.004258098  | 0.005309147 | 0.423924238 |
| alanine.lysopcac180          | -0.030117036 | 0.037552401 | 0.423941745 |
| pcaac406.c2                  | -0.044662417 | 0.055707786 | 0.424099493 |
| pcaac321.pcaac384            | 0.039810371  | 0.049662513 | 0.424162066 |
| pcaac281.pcaac405            | 0.026501133  | 0.033061676 | 0.424191825 |
| c141.pcaec445                | -0.030365703 | 0.037886563 | 0.424235932 |
| pcaac386.lysopcac203         | -0.009945982 | 0.012410779 | 0.424288647 |
| prolinr.pcaec401             | 0.013427229  | 0.016755252 | 0.424302687 |
| pcaac362.smc180              | -0.006939117 | 0.008659479 | 0.424327131 |

|                        |              |             |             |
|------------------------|--------------|-------------|-------------|
| pcaac344.pcaac404      | 0.003260126  | 0.004068663 | 0.424358869 |
| kynurenine.c3          | 0.025578893  | 0.03192283  | 0.424361281 |
| pcaac422.c141          | -0.029382515 | 0.036669869 | 0.424362084 |
| pcaac384.pcaec406      | 0.010308624  | 0.012867388 | 0.424435874 |
| lysine.tyrosine        | -0.02694779  | 0.033638366 | 0.424459298 |
| pcaec365.pcaec341      | 0.042517746  | 0.053079667 | 0.424508483 |
| pcaec425.glutamicacid  | 0.043019091  | 0.053718983 | 0.424624032 |
| pcaac362.h1            | 0.002308712  | 0.002883235 | 0.424670552 |
| c8.h1                  | 0.005375313  | 0.006714198 | 0.424755793 |
| putrescine.kynurenine  | 0.006203712  | 0.007749    | 0.424759624 |
| c141oh.lysopcac280     | 0.008397748  | 0.010490883 | 0.424818354 |
| pcaec445.phenylalanine | -0.036371294 | 0.04543751  | 0.424825352 |
| h1.pcaec421            | 0.007098031  | 0.008868531 | 0.42488704  |
| smc161.pcaec364        | 0.016862957  | 0.021075279 | 0.425020889 |
| pcaac383.pcaac240      | -0.011778751 | 0.014724076 | 0.425115774 |
| h1.smc260              | 0.023466872  | 0.029336366 | 0.425139503 |
| lysopcac161.smc161     | -0.052714173 | 0.065901783 | 0.425159352 |
| pcaec382.lysopcac181   | 0.047413983  | 0.059285381 | 0.425235298 |
| c3.pcaec420            | -0.027464625 | 0.034345167 | 0.42528931  |
| c181.c162              | -0.069456321 | 0.086858079 | 0.425296201 |
| asparticacid.c16       | 0.031065511  | 0.038850924 | 0.425322162 |
| pcaac403.citruline     | 0.01894964   | 0.023702093 | 0.425389019 |
| pcaac383.serine        | -0.018806478 | 0.023524239 | 0.42541283  |
| c102.pcaec402          | 0.034819622  | 0.043556381 | 0.425433692 |
| c51dc.c141oh           | 0.068020981  | 0.085092736 | 0.425456935 |
| pcaac366.pcaac322      | 0.054190492  | 0.067807946 | 0.425571669 |
| glycine.c8             | 0.024144254  | 0.030215937 | 0.425640542 |
| pcaec445.pcaec421      | -0.001005108 | 0.001258171 | 0.425751782 |
| pcaac361.smc240        | 0.025068758  | 0.03138279  | 0.425785601 |
| pcaac240.pcaac424      | -0.013274264 | 0.01662264  | 0.425924672 |
| lysopcac161.pcaac381   | 0.01465429   | 0.018353445 | 0.425991928 |
| asparticacid.pcaac422  | 0.019554756  | 0.0244918   | 0.426008373 |
| glutamicacid.pcaec405  | 0.043794852  | 0.054865986 | 0.426127227 |
| pcaec342.lysopcac160   | -0.010684486 | 0.013388197 | 0.426221114 |
| pcaec444.creatinine    | 0.004057723  | 0.005084725 | 0.426238709 |
| smohc222.c14           | -0.020918485 | 0.026214144 | 0.426260409 |
| citruline.pcaac422     | -0.038631025 | 0.048415524 | 0.426306054 |
| lysopcac180.pcaec423   | -0.023313977 | 0.029225895 | 0.426415548 |
| serotonin.histidine    | -0.044975223 | 0.056386658 | 0.426470358 |
| lysine.lysopcac140     | 0.000918477  | 0.001151619 | 0.42651042  |
| smc260.creatinine      | -0.006489069 | 0.008138338 | 0.426630046 |
| pcaec301.pcaac240      | -0.011105837 | 0.013928865 | 0.426641854 |
| lysopcac161.asparagine | 0.006907323  | 0.008663713 | 0.426673537 |
| smc260.pcaec365        | 0.018592269  | 0.023324186 | 0.426758312 |
| pcaec404.pcaec362      | 0.005966329  | 0.007486854 | 0.426883754 |

|                                    |              |             |             |
|------------------------------------|--------------|-------------|-------------|
| c4.pcaec424                        | 0.008631126  | 0.010831724 | 0.426924085 |
| pcaec446.pcaac300                  | -0.028232859 | 0.035431636 | 0.426930668 |
| pcaac361.pcaac322                  | 0.054672142  | 0.068627812 | 0.427034444 |
| pcaac344.asparticacid              | -0.020528038 | 0.025775372 | 0.42716553  |
| lysopcac204.acetylornithoine       | -0.01713817  | 0.021519286 | 0.4271718   |
| pcaac343.pcaec362                  | 0.026651802  | 0.033473708 | 0.427292678 |
| pcaec401.c101                      | -0.013349599 | 0.016769195 | 0.427363549 |
| c181.h1                            | 0.002308015  | 0.002899248 | 0.427366517 |
| smohc241.pcaec405                  | -0.022518077 | 0.028287526 | 0.427384449 |
| serine.pcaac401                    | -0.018839528 | 0.023666817 | 0.427390992 |
| pcaec445.pcaac362                  | -0.005078097 | 0.006379505 | 0.427408127 |
| pcaec381.glutamine                 | -0.010207197 | 0.01282343  | 0.427420588 |
| smohc221.pcaec342                  | -0.092738886 | 0.11652872  | 0.427498503 |
| ornithine.pcaac403                 | 0.003370394  | 0.004235644 | 0.427570371 |
| c51.pcaec446                       | -0.047031232 | 0.059116194 | 0.427656684 |
| pcaac381.c101                      | -0.015461434 | 0.019435114 | 0.427674961 |
| glycine.pcaac343                   | 0.015806121  | 0.019870395 | 0.427721536 |
| pcaac401.pcaac426                  | 0.066460913  | 0.083557244 | 0.427760383 |
| pcaac386.pcaec343                  | -0.045194497 | 0.056832786 | 0.427861836 |
| pcaec385.lysopcac170               | 0.005979351  | 0.007520131 | 0.42792334  |
| glutamicacid.lysopcac180           | -0.078359774 | 0.09855932  | 0.427958551 |
| pcaac384.smc180                    | 0.030635494  | 0.038533479 | 0.427967893 |
| pcaac364.asparagine                | 0.007378964  | 0.009283526 | 0.428078512 |
| c14.lysopcac160                    | 0.01436883   | 0.018078541 | 0.428104406 |
| pcaac386.pcaac425                  | 0.070225371  | 0.08835788  | 0.428114249 |
| pcaac342.alphaaminoadipicacid      | 0.007929175  | 0.009977812 | 0.42817373  |
| pcaac321.pcaac381                  | 0.014851304  | 0.018689458 | 0.428200062 |
| smc240.pcaec421                    | 0.00135829   | 0.001709704 | 0.428302382 |
| smc240.pcaac362                    | -0.007415929 | 0.009334567 | 0.428302432 |
| smohc161.pcaec403                  | -0.019304449 | 0.02430294  | 0.42837967  |
| lysopcac203.pcaac422               | -0.045712096 | 0.057564607 | 0.428510152 |
| pcaac420.glutamicacid              | 0.044369747  | 0.055876488 | 0.428528974 |
| smc240.c8                          | -0.02772307  | 0.034916219 | 0.428575377 |
| pcaac364.creatinine                | -0.006435584 | 0.008105861 | 0.428602205 |
| smohc221.pcaac380                  | -0.037183866 | 0.046834589 | 0.42860325  |
| c141oh.pcaac426                    | 0.036255339  | 0.045666701 | 0.428619681 |
| pcaac404.asymmetricdimethylarginir | -0.015879278 | 0.020007851 | 0.428770325 |
| pcaac384.methionine                | -0.012302858 | 0.015501686 | 0.428773754 |
| lysopcac182.pcaac420               | 0.072020375  | 0.090772831 | 0.428909048 |
| smohc161.phenylalanine             | -0.030602069 | 0.038573413 | 0.428948036 |
| asymmetricdimethylarginine.pcaec42 | -0.004313621 | 0.005437284 | 0.428950918 |
| lysopcac161.smc260                 | -0.017583652 | 0.022164807 | 0.428966701 |
| pcaac401.pcaec322                  | 0.034910529  | 0.044011989 | 0.429029996 |
| pcaac385.lysopcac281               | 0.013570171  | 0.017108497 | 0.429042694 |
| pcaac386.valine                    | -0.036957592 | 0.046594648 | 0.429048871 |

|                        |              |             |             |
|------------------------|--------------|-------------|-------------|
| pcaec343.smc181        | 0.009422837  | 0.011880181 | 0.42905841  |
| pcaec422.creatinine    | 0.016299975  | 0.020551611 | 0.429077031 |
| lysopcac170.methionine | -0.023110268 | 0.029139149 | 0.429090766 |
| pcaac364.pcaec445      | 0.034343975  | 0.043305474 | 0.429112345 |
| pcaac342.asparticacid  | 0.021233541  | 0.0267781   | 0.429181366 |
| pcaac424.pcaec404      | 0.047630838  | 0.06007089  | 0.429200988 |
| pcaec383.pcaac366      | -0.014502397 | 0.018294731 | 0.429318027 |
| pcaec445.pcaec402      | -0.018039683 | 0.022759149 | 0.429361359 |
| citruline.c101         | 0.007710281  | 0.009727496 | 0.429365288 |
| lysopcac204.asparagine | -0.004078754 | 0.005146102 | 0.429386542 |
| c102.smohc141          | -0.01742415  | 0.021985249 | 0.429417199 |
| pcaac322.serine        | -0.016818788 | 0.021222373 | 0.429437814 |
| pcaec422.lysopcac281   | 0.007286818  | 0.009195159 | 0.429461222 |
| pcaec364.pcaac320      | 0.064736835  | 0.081705128 | 0.429542335 |
| c10.c16                | 0.027947288  | 0.035280198 | 0.429641426 |
| pcaec363.pcaac421      | 0.008481556  | 0.010708027 | 0.429686535 |
| pcaec425.pcaec384      | -0.043738265 | 0.055224273 | 0.429723146 |
| pcaec382.pcaec383      | -0.167526613 | 0.21155074  | 0.42978915  |
| pcaac425.h1            | 0.006127979  | 0.007740764 | 0.429933116 |
| c14.isoleucine         | -0.006514656 | 0.008229327 | 0.429939702 |
| pcaec386.pcaac321      | -0.015028777 | 0.018985695 | 0.429971519 |
| pcaec301.pcaac426      | 0.04718419   | 0.059621776 | 0.430083356 |
| pcaac365.pcaec322      | -0.058289177 | 0.073660309 | 0.430122767 |
| pcaec342.pcaac362      | -0.009462515 | 0.011959356 | 0.430181653 |
| pcaec301.lysopcac204   | -0.025411027 | 0.032117455 | 0.430200422 |
| pcaac384.pcaec301      | 0.036977782  | 0.046739935 | 0.430230433 |
| pcaec300.c5            | -0.005237545 | 0.006620395 | 0.430239832 |
| pcaec402.c16           | 0.01442985   | 0.018240934 | 0.430270699 |
| c12.isoleucine         | -0.005403696 | 0.00683181  | 0.430333898 |
| c12.smc160             | 0.0584051    | 0.073857681 | 0.430439793 |
| pcaac383.pcaec301      | 0.034657845  | 0.043828847 | 0.430454195 |
| lysopcac180.pcaec363   | 0.014533151  | 0.018379227 | 0.430463689 |
| lysopcac180.pcaec384   | -0.029373309 | 0.037148309 | 0.430483509 |
| pcaec362.asparticacid  | 0.016350922  | 0.020679057 | 0.430485936 |
| pcaec443.pcaec362      | 0.006103684  | 0.007719361 | 0.430486839 |
| pcaec385.pcaac405      | -0.028465949 | 0.036004755 | 0.430534361 |
| putrescine.pcaac343    | -0.013534077 | 0.017119    | 0.430550819 |
| asparagine.pcaec385    | 0.039711571  | 0.050245065 | 0.430684899 |
| c4.arginine            | -0.042435919 | 0.053693248 | 0.430695194 |
| pcaac300.c141oh        | 0.050192247  | 0.063515457 | 0.430755259 |
| smc260.arginine        | -0.021123403 | 0.026731974 | 0.430781034 |
| pcaac405.pcaac426      | 0.038557267  | 0.048795922 | 0.430791782 |
| pcaac386.kynurenine    | -0.005166701 | 0.006539464 | 0.430846347 |
| smc261.pcaec402        | 0.044819171  | 0.056733477 | 0.430895857 |
| leucine.smc261         | -0.04085458  | 0.051715111 | 0.430897059 |



|                                 |              |             |             |
|---------------------------------|--------------|-------------|-------------|
| pcaec385.lysopcac203            | -0.008430116 | 0.010671508 | 0.430913514 |
| pcaac426.spermidine             | 0.044997907  | 0.056963135 | 0.430923372 |
| pcaac424.lysopcac170            | -0.006427523 | 0.008139244 | 0.431070412 |
| putrescine.smc181               | 0.015554613  | 0.01969974  | 0.431134794 |
| glycine.pcaac344                | 0.022215431  | 0.028137027 | 0.431158273 |
| smohc221.serine                 | -0.014264345 | 0.018070544 | 0.431259823 |
| c102.creatinine                 | 0.014093424  | 0.017858489 | 0.431374976 |
| lysopcac161.c102                | 0.021758286  | 0.027573984 | 0.431424319 |
| pcaac426.c102                   | 0.024672451  | 0.031267921 | 0.431436881 |
| lysopcac160.transhydroxyproline | 0.0492669    | 0.062438098 | 0.431445063 |
| c142.c18                        | -0.023766485 | 0.030129768 | 0.431589408 |
| asparticacid.arginine           | -0.047034677 | 0.059641568 | 0.431695269 |
| pcaac342.pcaac363               | -0.014664589 | 0.01859536  | 0.431699292 |
| pcaec322.tyrosine               | -0.032967456 | 0.041804371 | 0.431700955 |
| pcaec445.methionine             | 0.017305996  | 0.02195324  | 0.431876329 |
| pcaac381.c8                     | 0.026524671  | 0.033649108 | 0.431899101 |
| pcaec401.pcaec360               | -0.002953631 | 0.003747403 | 0.431952759 |
| c181.smohc141                   | 0.04332444   | 0.054968008 | 0.431955675 |
| pcaac380.c141oh                 | 0.069321774  | 0.087958967 | 0.431991022 |
| pcaac422.isoleucine             | -0.015897533 | 0.020172024 | 0.432000853 |
| pcaac341.pcaac281               | -0.002567059 | 0.003257445 | 0.432023528 |
| alanine.pcaac385                | 0.011911644  | 0.015116282 | 0.432057473 |
| alphaaminoadipicacid.c51        | 0.04090163   | 0.051906424 | 0.432065114 |
| citruline.glycine               | 0.039726317  | 0.050427286 | 0.432178074 |
| creatinine.asparagine           | -0.004120518 | 0.005231525 | 0.432272383 |
| arginine.c141                   | -0.028723394 | 0.036474311 | 0.43235156  |
| smohc222.c162                   | -0.055772024 | 0.070825398 | 0.43237406  |
| pcaac422.pcaec401               | -0.00993579  | 0.012619111 | 0.432430854 |
| creatinine.histidine            | 0.032965847  | 0.041871536 | 0.432460817 |
| pcaac341.pcaac422               | -0.018944647 | 0.024063903 | 0.432487137 |
| methioninesulfoxide.pcaac426    | 0.094879404  | 0.1205226   | 0.432505098 |
| kynurenine.c101                 | -0.009263876 | 0.011769291 | 0.432569628 |
| pcaac281.putrescine             | 0.015130017  | 0.01922329  | 0.432602103 |
| lysopcac280.glutamine           | -0.007519306 | 0.009554265 | 0.432635146 |
| serotonin.smc261                | -0.022378987 | 0.028443014 | 0.432757399 |
| pcaac360.pcaac403               | -0.007714806 | 0.009806446 | 0.432811818 |
| pcaec403.c2                     | -0.06872388  | 0.087374958 | 0.432909742 |
| lysopcac182.pcaac380            | -0.026391845 | 0.033559034 | 0.43297358  |
| c16.c182                        | 0.062886397  | 0.079966496 | 0.432985891 |
| pcaec445.pcaac403               | -0.003428579 | 0.004360113 | 0.433019946 |
| c141oh.c18                      | -0.038245441 | 0.048645308 | 0.433102079 |
| pcaac424.pcaec385               | -0.043358466 | 0.055153853 | 0.433145049 |
| isoleucine.smohc221             | -0.025793501 | 0.032814482 | 0.433201388 |
| glycine.pcaec405                | -0.031129901 | 0.039612971 | 0.43331172  |
| pcaac381.pcaec404               | 0.013535732  | 0.017225867 | 0.433353637 |

|                                     |              |             |             |
|-------------------------------------|--------------|-------------|-------------|
| pcaac281.kynurenine                 | -0.003699493 | 0.004708464 | 0.433393449 |
| alanine.pcaec385                    | 0.029235975  | 0.037209868 | 0.433397178 |
| c14.pcaac281                        | -0.00068202  | 0.000868081 | 0.43342122  |
| pcaac342.pcaac383                   | -0.005265046 | 0.006701673 | 0.433439984 |
| pcaac420.pcaac385                   | -0.031751246 | 0.040415394 | 0.433445252 |
| pcaec341.lysopcac170                | 0.006803573  | 0.008661936 | 0.433542311 |
| smohc141.pcaec424                   | -0.008850023 | 0.011268337 | 0.433581908 |
| pcaec384.lysopcac161                | 0.051031413  | 0.064978298 | 0.4335981   |
| pcaac364.c12                        | 0.028997048  | 0.036923865 | 0.433622008 |
| pcaec446.pcaec402                   | -0.019192511 | 0.02444217  | 0.433679669 |
| pcaac421.alanine                    | -0.007456987 | 0.009498518 | 0.433768954 |
| pcaec425.pcaec421                   | -0.001055478 | 0.001344499 | 0.433788844 |
| lysopcac182.lysine                  | 0.041385815  | 0.052742345 | 0.433996489 |
| pcaac344.pcaec384                   | 0.022172388  | 0.02825783  | 0.434015945 |
| pcaac323.pcaec360                   | 0.003919149  | 0.004996122 | 0.434137264 |
| pcaac386.pcaec445                   | 0.053484091  | 0.06818605  | 0.434168604 |
| pcaac343.lysopcac281                | 0.012081755  | 0.015404598 | 0.434220802 |
| pcaac381.pcaec402                   | 0.033603471  | 0.042846525 | 0.434232545 |
| pcaac343.pcaec421                   | -0.003650751 | 0.004655107 | 0.434249448 |
| pcaec422.pcaac406                   | 0.027525541  | 0.035098606 | 0.434256325 |
| pcaec360.c5                         | -0.007263839 | 0.009262497 | 0.43426464  |
| pcaec445.pcaac300                   | -0.028156062 | 0.035905617 | 0.434294837 |
| pcaac322.pcaec340                   | -0.036549518 | 0.046611363 | 0.434315613 |
| asparagine.creatinine               | -0.008496479 | 0.010836256 | 0.434347407 |
| pcaec446.lysopcac160                | -0.005248375 | 0.006694463 | 0.434400799 |
| smohc161.c181                       | 0.009933705  | 0.012671    | 0.434410099 |
| c51.pcaac320                        | -0.04109665  | 0.052421494 | 0.434413605 |
| pcaac405.pcaec301                   | 0.041138264  | 0.052480342 | 0.434463987 |
| smc160.lysopcac182                  | -0.027174474 | 0.034669264 | 0.434498585 |
| pcaac404.pcaec322                   | -0.043773024 | 0.055847889 | 0.434516259 |
| pcaac401.pcaac240                   | -0.014184978 | 0.018098471 | 0.434529986 |
| pcaac403.pcaac381                   | 0.024934304  | 0.031815921 | 0.43456591  |
| pcaac322.pcaec382                   | 0.008256925  | 0.010536992 | 0.434619822 |
| pcaec383.pcaac365                   | -0.038558223 | 0.049207327 | 0.434635055 |
| smc260.pcaec380                     | 0.021672215  | 0.027660583 | 0.434682826 |
| creatinine.pcaec362                 | -0.01454877  | 0.018569738 | 0.434705475 |
| h1.c51                              | 0.047605701  | 0.060767398 | 0.43473945  |
| asymmetricdimethylarginine.putresci | 0.032602751  | 0.041625328 | 0.434836268 |
| lysine.lysopcac204                  | -0.014748369 | 0.018831276 | 0.434870379 |
| pcaec384.c16                        | 0.02147606   | 0.027422919 | 0.434895008 |
| c10.histidine                       | 0.037979117  | 0.048496372 | 0.434900605 |
| pcaac362.pcaec343                   | 0.051966057  | 0.066360925 | 0.434930444 |
| smc260.c141oh                       | 0.060678094  | 0.077488821 | 0.434945698 |
| smohc241.pcaec360                   | -0.006158333 | 0.007865384 | 0.434998068 |
| c14.pcaac404                        | 0.001663304  | 0.002124492 | 0.435026288 |

|                              |              |             |             |
|------------------------------|--------------|-------------|-------------|
| pcaac406.pcaec363            | -0.018662241 | 0.023839256 | 0.435074194 |
| pcaec382.c8                  | 0.023597593  | 0.030146694 | 0.435119646 |
| pcaec383.pcaac421            | 0.011594565  | 0.014812871 | 0.435133164 |
| pcaec383.pcaec362            | 0.006873486  | 0.008782779 | 0.435207132 |
| serotonin.alanine            | -0.008589631 | 0.010975729 | 0.435211294 |
| c51dc.pcaec402               | 0.026989383  | 0.034487111 | 0.435216581 |
| lysopcac281.c14              | -0.031735092 | 0.040552169 | 0.435227615 |
| pcaec340.pcaac403            | 0.015901004  | 0.020319571 | 0.435244137 |
| lysopcac180.pcaac365         | 0.038357274  | 0.049022461 | 0.435304682 |
| pcaec365.asparticacid        | -0.019898423 | 0.025434065 | 0.435357147 |
| pcaec343.transhydroxyproline | 0.021970312  | 0.028086109 | 0.435418589 |
| lysopcac180.putrescine       | 0.026295691  | 0.033623234 | 0.435523568 |
| smc160.pcaac380              | -0.035167965 | 0.044970823 | 0.435553849 |
| pcaec403.pcaec362            | 0.00521373   | 0.006667432 | 0.435581739 |
| serotonin.lysopcac180        | 0.062440828  | 0.079855404 | 0.435608749 |
| methioninesulfoxide.pcaec343 | 0.077291076  | 0.098853675 | 0.435638068 |
| lysopcac170.pcaac343         | 0.014851874  | 0.018999696 | 0.435745561 |
| c51.valine                   | 0.045243714  | 0.057881182 | 0.435760054 |
| serine.c142                  | 0.024703788  | 0.031607497 | 0.435810043 |
| pcaac323.pcaec340            | -0.013367389 | 0.01710393  | 0.435834066 |
| asparagine.pcaec420          | -0.024106999 | 0.03084956  | 0.435893628 |
| c0.pcaec405                  | -0.029802283 | 0.038143431 | 0.435961521 |
| pcaec322.creatinine          | 0.004497129  | 0.005756223 | 0.435995232 |
| pcaec362.pcaac321            | -0.024939397 | 0.031922739 | 0.436007891 |
| pcaec405.asparticacid        | 0.03960102   | 0.050690719 | 0.436016197 |
| pcaac422.lysopcac181         | 0.04633996   | 0.059319338 | 0.436035766 |
| creatinine.pcaac343          | 0.034194614  | 0.043777973 | 0.43609618  |
| pcaec340.lysopcac161         | 0.042494761  | 0.054407149 | 0.43612003  |
| pcaec404.pcaac380            | 0.054909085  | 0.070311086 | 0.436182251 |
| pcaec422.c8                  | 0.026445084  | 0.033863413 | 0.436188752 |
| lysopcac204.spermidine       | -0.042255214 | 0.054112199 | 0.436219437 |
| prolinr.c5                   | 0.01150218   | 0.014733063 | 0.436322751 |
| c142.pcaac386                | 0.009308771  | 0.011924721 | 0.436368076 |
| prolinr.leucine              | -0.013361664 | 0.01711753  | 0.436394027 |
| prolinr.c101                 | 0.006814193  | 0.008729862 | 0.436407144 |
| pcaec443.pcaac421            | 0.010167305  | 0.013026512 | 0.436438051 |
| citruiline.lysopcac280       | -0.006921563 | 0.008868264 | 0.436450823 |
| pcaac361.c51                 | -0.039635429 | 0.050785037 | 0.43646958  |
| smohc141.pcaac322            | 0.039331309  | 0.050409983 | 0.436602284 |
| smc160.pcaac385              | -0.015199406 | 0.019480715 | 0.436602411 |
| pcaac424.tyrosine            | -0.036337249 | 0.046575261 | 0.436628738 |
| pcaec444.pcaec383            | -0.025469219 | 0.032647254 | 0.436658017 |
| pcaec381.ornithine           | 0.033432584  | 0.042856801 | 0.436677793 |
| pcaec420.c51dc               | -0.081974146 | 0.105091507 | 0.436720898 |
| pcaec423.pcaec362            | 0.007813368  | 0.010017127 | 0.436735817 |

|                              |              |             |             |
|------------------------------|--------------|-------------|-------------|
| smohc221.c102                | 0.019755999  | 0.025332206 | 0.436808653 |
| ornithine.arginine           | 0.012438334  | 0.015949124 | 0.436809297 |
| c2.c141oh                    | -0.084671292 | 0.108604327 | 0.436952908 |
| smohc221.c0                  | -0.000482692 | 0.000619177 | 0.4369887   |
| pcaac365.lysopcac170         | 0.006713337  | 0.008614057 | 0.437119652 |
| alanine.pcaac300             | -0.056249154 | 0.072183274 | 0.437173718 |
| isoleucine.pcaec405          | 0.039848687  | 0.051152186 | 0.437310207 |
| pcaac424.c4                  | -0.014274362 | 0.018327137 | 0.437402607 |
| pcaec385.valine              | -0.048847437 | 0.062717128 | 0.437409404 |
| pcaec402.smc160              | -0.044191297 | 0.056747253 | 0.437476493 |
| pcaac344.lysopcac161         | 0.055083856  | 0.070737968 | 0.437497706 |
| pcaac421.taurine             | -0.042898876 | 0.055098639 | 0.437567955 |
| pcaec340.pcaec343            | 0.045996955  | 0.059078222 | 0.437571509 |
| arginine.pcaac343            | 0.016907932  | 0.021716975 | 0.437582577 |
| pcaac424.pcaec361            | 0.008971758  | 0.011524074 | 0.437603255 |
| histidine.pcaec402           | -0.023068619 | 0.029631295 | 0.437603824 |
| lysopcac280.pcaec361         | 0.006499592  | 0.00835102  | 0.437734722 |
| leucine.pcaec405             | 0.037809502  | 0.048593087 | 0.437861212 |
| pcaac322.smc160              | 0.040833127  | 0.052482154 | 0.437888024 |
| pcaac380.methioninesulfoxide | 0.012674324  | 0.016291609 | 0.4379303   |
| pcaac365.lysine              | 0.054720285  | 0.070340436 | 0.437948756 |
| pcaec383.phenylalanine       | -0.046895982 | 0.060290526 | 0.438008466 |
| c102.taurine                 | -0.0114624   | 0.014736911 | 0.438026845 |
| pcaac383.pcaac425            | 0.062460885  | 0.080307353 | 0.438043976 |
| lysopcac182.serine           | -0.008056082 | 0.010359778 | 0.438127494 |
| alanine.pcaec380             | 0.029387831  | 0.037791765 | 0.438130761 |
| pcaac322.pcaec385            | 0.030081841  | 0.038685402 | 0.438144498 |
| pcaac386.methionine          | -0.020013671 | 0.025739419 | 0.438175306 |
| pcaac360.pcaac384            | -0.031072388 | 0.039967981 | 0.438244334 |
| ornithine.c16                | -0.032131066 | 0.041330479 | 0.438252476 |
| spermidine.c51dc             | 0.11792118   | 0.151725894 | 0.438381447 |
| acetylnornithoine.pcaac384   | -0.034574708 | 0.044495927 | 0.438480185 |
| pcaec363.c18                 | -0.017627417 | 0.022685772 | 0.438483487 |
| c102.ornithine               | 0.013162808  | 0.016941295 | 0.438518395 |
| lysopcac280.lysine           | -0.051254249 | 0.065979087 | 0.438600834 |
| pcaac420.ornithine           | -0.013223184 | 0.017022331 | 0.438607746 |
| smohc221.pcaec343            | 0.051555117  | 0.066368726 | 0.438616908 |
| pcaec364.lysopcac170         | 0.005729966  | 0.007377145 | 0.438663777 |
| pcaec382.pcaac363            | -0.019887881 | 0.025607463 | 0.438707729 |
| smc240.c14                   | 0.01617337   | 0.020830123 | 0.438826858 |
| c3.lysopcac203               | 0.020424629  | 0.026309671 | 0.438900397 |
| lysopcac181.pcaec421         | -0.001747384 | 0.002251021 | 0.438931814 |
| pcaec404.pcaac366            | -0.013612343 | 0.017535942 | 0.438937178 |
| pcaac380.lysopcac140         | 0.001087455  | 0.001401047 | 0.438984796 |
| pcaec406.lysine              | -0.06023391  | 0.077605733 | 0.438996621 |

|                                 |              |             |             |
|---------------------------------|--------------|-------------|-------------|
| pcaec422.pcaac362               | -0.006815059 | 0.008780699 | 0.439003653 |
| pcaec300.pcaec321               | 0.056760014  | 0.073133353 | 0.439017903 |
| pcaac341.pcaec382               | -0.006964635 | 0.008974815 | 0.439074881 |
| pcaec443.pcaac426               | 0.054988244  | 0.070879979 | 0.439207944 |
| pcaac421.lysopcac204            | 0.029007576  | 0.037394082 | 0.439247591 |
| pcaac300.serine                 | -0.026036644 | 0.033567126 | 0.439287242 |
| pcaac281.c12                    | 0.038003994  | 0.048997947 | 0.439307734 |
| pcaac426.pcaec404               | -0.010692427 | 0.013786483 | 0.439337735 |
| pcaec422.lysopcac160            | -0.016511277 | 0.021293108 | 0.439423095 |
| smc241.pcaac405                 | -0.015604242 | 0.02013017  | 0.439576953 |
| pcaac361.c12                    | -0.043476093 | 0.05608961  | 0.43960548  |
| pcaec380.lysopcac280            | 0.010193358  | 0.013151332 | 0.439627082 |
| lysopcac161.ornithine           | -0.033521216 | 0.043260655 | 0.439754095 |
| c16.smc161                      | -0.044075511 | 0.056889062 | 0.439815142 |
| lysopcac203.pcaec343            | 0.04761094   | 0.061456561 | 0.439846754 |
| c162.lysine                     | 0.041162015  | 0.053138476 | 0.439900306 |
| c141oh.c162                     | -0.068213605 | 0.088066886 | 0.439930962 |
| pcaec405.c16                    | 0.014394175  | 0.018583869 | 0.439939054 |
| c51.c162                        | 0.051333937  | 0.066280949 | 0.439975616 |
| lysopcac181.creatinine          | 0.003530573  | 0.004559134 | 0.440031388 |
| pcaac426.asparticacid           | 0.021155302  | 0.027320184 | 0.440059919 |
| pcaec403.histidine              | -0.04098343  | 0.052928994 | 0.440081935 |
| pcaec361.pcaac365               | -0.037468621 | 0.048393474 | 0.440117398 |
| c2.pcaec343                     | -0.030796846 | 0.039776655 | 0.440120472 |
| c10.pcaec401                    | -0.008702411 | 0.011240917 | 0.440162623 |
| phenylalanine.pcaac380          | 0.06046956   | 0.078108706 | 0.440163135 |
| pcaac322.lysopcac281            | 0.006848214  | 0.008847025 | 0.440223347 |
| lysopcac181.transhydroxyproline | 0.034270304  | 0.044279073 | 0.440287004 |
| smc181.valine                   | 0.074527667  | 0.096295831 | 0.440296884 |
| smc161.pcaac322                 | 0.03651184   | 0.047177289 | 0.440306653 |
| pcaac323.lysopcac180            | 0.025666397  | 0.033168677 | 0.440373848 |
| pcaec360.pcaac405               | -0.025205379 | 0.032576065 | 0.440418127 |
| c102.smc202                     | 0.042929008  | 0.055486464 | 0.44045047  |
| pcaec402.c8                     | 0.024208691  | 0.031290229 | 0.440451767 |
| acetylmithoine.asparagine       | -0.00621278  | 0.00803025  | 0.440457675 |
| alanine.lysopcac140             | 0.001064222  | 0.001375587 | 0.44047108  |
| glycine.smohc241                | -0.050359351 | 0.065097853 | 0.440503343 |
| pcaec420.glutamine              | -0.005316563 | 0.006873903 | 0.440593568 |
| pcaac425.tyrosine               | -0.044029097 | 0.056927331 | 0.440602587 |
| alanine.pcaec343                | -0.044922862 | 0.058083368 | 0.440606088 |
| alphaaminoadipicacid.c182       | -0.019377242 | 0.025054131 | 0.440609235 |
| pcaec383.pcaec401               | -0.0709734   | 0.091770293 | 0.440629324 |
| pcaec360.c4                     | -0.01120688  | 0.014491553 | 0.440654228 |
| serotonin.lysopcac140           | 0.003213728  | 0.004155727 | 0.440662243 |
| pcaec446.ornithine              | -0.011895636 | 0.015389364 | 0.440867139 |

|                                    |              |             |             |
|------------------------------------|--------------|-------------|-------------|
| lysopcac140.isoleucine             | -0.01701061  | 0.022010749 | 0.440953136 |
| c0.pcaec424                        | 0.006315503  | 0.008173155 | 0.441023348 |
| lysopcac182.c182                   | 0.066589025  | 0.086180253 | 0.441047806 |
| c141.smc161                        | -0.031523467 | 0.040801052 | 0.441081687 |
| pcaec402.pcaac405                  | -0.028846857 | 0.037340836 | 0.441132224 |
| c141oh.phenylalanine               | -0.031008391 | 0.040141134 | 0.441158314 |
| pcaac386.pcaac421                  | -0.0123599   | 0.016001267 | 0.441188768 |
| lysopcac204.c101                   | -0.014177444 | 0.018354681 | 0.441198724 |
| pcaec343.pcaec424                  | -0.006243815 | 0.008083818 | 0.441217167 |
| citruine.glutamicacid              | 0.024949203  | 0.032305058 | 0.441266897 |
| pcaec384.pcaac422                  | -0.027044707 | 0.035018962 | 0.441274388 |
| alphaaminoadipicacid.smc261        | -0.008160185 | 0.010567297 | 0.441319425 |
| pcaac422.asymmetricdimethylarginir | 0.00912917   | 0.011822837 | 0.441347219 |
| kynurenine.histidine               | 0.053326276  | 0.069064356 | 0.441370634 |
| pcaec381.smc260                    | -0.023025698 | 0.029821618 | 0.441376608 |
| pcaec301.transhydroxyproline       | 0.019380536  | 0.02510147  | 0.441392317 |
| c5.lysopcac204                     | 0.03300633   | 0.042751225 | 0.441411152 |
| pcaec342.serotonin                 | 0.062943767  | 0.081540582 | 0.441484347 |
| pcaac322.pcaac344                  | -0.061934928 | 0.080238365 | 0.441510955 |
| smohc222.pcaac323                  | 0.068675032  | 0.088971642 | 0.441517567 |
| pcaac420.acetylorlithoine          | -0.031415565 | 0.040712181 | 0.441650564 |
| glycine.putrescine                 | -0.00848508  | 0.010997922 | 0.44172942  |
| pcaec425.pcaec365                  | 0.022567059  | 0.029250259 | 0.441729507 |
| asymmetricdimethylarginine.pcaac32 | 0.072129722  | 0.09349312  | 0.441740675 |
| pcaec405.creatinine                | 0.007414401  | 0.009611369 | 0.441786574 |
| c4.pcaec363                        | 0.008862633  | 0.011488796 | 0.441789315 |
| pcaac422.pcaec402                  | -0.036535198 | 0.047361679 | 0.441793373 |
| pcaec423.asparagine                | -0.006969413 | 0.009035054 | 0.441813269 |
| smc161.creatinine                  | 0.00425319   | 0.005514577 | 0.441879208 |
| c141oh.smohc222                    | -0.007036846 | 0.009124662 | 0.441922459 |
| c5.c4                              | 0.033053423  | 0.042865016 | 0.441972647 |
| pcaec423.lysopcac161               | 0.054719591  | 0.07096498  | 0.441988058 |
| c0.c162                            | -0.065218393 | 0.084588041 | 0.44202753  |
| pcaec322.pcaac425                  | -0.071231157 | 0.092389912 | 0.442043971 |
| pcaec340.smohc221                  | -0.045714797 | 0.059298865 | 0.442080716 |
| c0.pcaec401                        | -0.023355183 | 0.030296397 | 0.442099713 |
| c142.pcaec401                      | -0.02501926  | 0.032458896 | 0.44215381  |
| c162.asparagine                    | -0.004599895 | 0.005968005 | 0.442176809 |
| pcaec405.pcaac380                  | 0.0651311    | 0.084507198 | 0.442202043 |
| phenylalanine.pcaac406             | 0.035621491  | 0.046231649 | 0.442329958 |
| pcaec380.pcaac366                  | -0.05403293  | 0.070130504 | 0.442352148 |
| smc160.pcaec405                    | -0.017906729 | 0.023245355 | 0.442427099 |
| pcaec421.pcaac322                  | 0.057444384  | 0.074573259 | 0.442443467 |
| pcaec341.pcaac403                  | 0.010435014  | 0.013551369 | 0.442605529 |
| pcaac425.pcaac362                  | -0.012410574 | 0.016119054 | 0.442665852 |

|                               |              |             |             |
|-------------------------------|--------------|-------------|-------------|
| alphaaminoadipicacid.pcaec363 | -0.00902472  | 0.011723625 | 0.442750187 |
| pcaac381.c3                   | 0.040772571  | 0.052971578 | 0.442799094 |
| pcaac404.smc241               | 0.015181354  | 0.019723646 | 0.442801074 |
| pcaac344.pcaac300             | -0.086499423 | 0.112384343 | 0.442817732 |
| pcaec423.pcaac403             | 0.027311426  | 0.035485031 | 0.442826341 |
| lysopcac280.c18               | 0.022031953  | 0.028628108 | 0.442867054 |
| pcaec363.pcaec385             | -0.044919491 | 0.058373222 | 0.442908112 |
| phenylalanine.lysopcac182     | -0.010657231 | 0.013853431 | 0.443048656 |
| pcaec341.pcaec401             | 0.038874849  | 0.050535474 | 0.443064018 |
| pcaac401.pcaac362             | -0.01627217  | 0.021157487 | 0.443159359 |
| serotonin.pcaec420            | -0.048559099 | 0.063138303 | 0.443163198 |
| pcaac320.pcaac420             | 0.054707247  | 0.071162774 | 0.443357763 |
| c5.serotonin                  | 0.102577506  | 0.133445697 | 0.443404305 |
| pcaec384.c18                  | -0.019320649 | 0.025138239 | 0.443467876 |
| pcaac361.lysopcac161          | 0.061791578  | 0.080409636 | 0.443536671 |
| pcaec361.methionine           | -0.024895066 | 0.032401395 | 0.443611678 |
| pcaac323.pcaec380             | -0.053836541 | 0.070074401 | 0.443644996 |
| ornithine.pcaec443            | -0.052494033 | 0.068336434 | 0.443707958 |
| smc261.serine                 | -0.015065477 | 0.019612477 | 0.443715481 |
| c162.arginine                 | 0.021749875  | 0.028314426 | 0.44371699  |
| pcaac240.kynurenine           | -0.062310202 | 0.081120968 | 0.443741047 |
| pcaac366.pcaac421             | -0.056391429 | 0.0734178   | 0.443756026 |
| pcaec422.pcaac365             | 0.049998168  | 0.065094354 | 0.443757035 |
| lysopcac160.pcaac344          | 0.049116047  | 0.063951327 | 0.443795697 |
| phenylalanine.c14             | -0.025248516 | 0.032876963 | 0.443826781 |
| pcaac385.pcaac365             | 0.029480742  | 0.038390471 | 0.443857343 |
| pcaac341.c101                 | -0.004040663 | 0.005262135 | 0.443882768 |
| lysopcac161.c142              | 0.021031356  | 0.027389312 | 0.443887531 |
| pcaec380.lysopcac182          | -0.018448116 | 0.024026583 | 0.443914883 |
| pcaac403.pcaac384             | 0.024327406  | 0.031684328 | 0.443924    |
| pcaac381.c5                   | -0.016663697 | 0.021706431 | 0.443995583 |
| smohc241.lysopcac280          | 0.006863653  | 0.008941179 | 0.444019077 |
| phenylalanine.alanine         | 0.013118329  | 0.017090678 | 0.444062277 |
| acetylornithoine.pcaac240     | -0.012591434 | 0.016406581 | 0.444127292 |
| alphaaminoadipicacid.c101     | 0.004201401  | 0.005474932 | 0.444170948 |
| c12.pcaec322                  | -0.024183128 | 0.031517831 | 0.444232987 |
| smohc241.pcaac362             | -0.006424755 | 0.008374757 | 0.444308135 |
| pcaac342.pcaec405             | -0.03510119  | 0.045755634 | 0.44431556  |
| serotonin.pcaec364            | -0.018848181 | 0.024570473 | 0.444337879 |
| pcaec381.c101                 | -0.047167223 | 0.061502399 | 0.444450572 |
| pcaec423.asparticacid         | 0.020888362  | 0.027242271 | 0.444541796 |
| c5.pcaac381                   | 0.021677755  | 0.028277488 | 0.444633449 |
| c181.asparticacid             | 0.010933963  | 0.014264474 | 0.444687487 |
| c18.smc261                    | 0.030069985  | 0.039234439 | 0.444746151 |
| smohc161.pcaac385             | -0.013397089 | 0.017480291 | 0.444750308 |

|                                |              |             |             |
|--------------------------------|--------------|-------------|-------------|
| methionine.smc241              | 0.010152165  | 0.013247869 | 0.444801718 |
| pcaec381.pcaec321              | -0.027486479 | 0.035870627 | 0.444835734 |
| pcaec405.pcaec422              | -0.07092889  | 0.092576075 | 0.444894037 |
| ornithine.valine               | 0.047115417  | 0.061495251 | 0.444897111 |
| pcaec281.pcaec420              | 0.04281184   | 0.055885347 | 0.444955184 |
| asparticacid.pcaec343          | 0.048937218  | 0.063881508 | 0.444957101 |
| smc241.c101                    | -0.007861709 | 0.010264926 | 0.445064833 |
| kynurenine.creatinine          | 0.00587684   | 0.007673626 | 0.445083521 |
| c5.c3                          | 0.027265211  | 0.035603853 | 0.445116355 |
| lysopcac140.creatinine         | 0.004089448  | 0.005340268 | 0.445127012 |
| c16.lysopcac140                | -0.000545675 | 0.000712599 | 0.445140193 |
| c51dc.pcaec322                 | 0.056957124  | 0.074382182 | 0.445150571 |
| c162.smohc161                  | 0.00301259   | 0.003934469 | 0.445176915 |
| pcaec421.pcaec240              | -0.0148727   | 0.0194276   | 0.44526401  |
| smc260.alanine                 | -0.012498741 | 0.016330826 | 0.445381697 |
| pcaec360.serine                | 0.03509984   | 0.045865886 | 0.445426419 |
| smohc161.pcaec344              | -0.047687782 | 0.062316798 | 0.445440387 |
| c18.smohc221                   | -0.041464066 | 0.054192489 | 0.445512734 |
| methioninesulfoxide.pcaec421   | 0.002942245  | 0.003845688 | 0.445542104 |
| pcaec403.pcaec421              | 0.006727321  | 0.008793026 | 0.445543048 |
| pcaec420.lysopcac180           | 0.034483249  | 0.045072304 | 0.445548667 |
| glycine.pcaec446               | 0.035767769  | 0.046752884 | 0.445564318 |
| pcaec403.pcaec362              | 0.007074811  | 0.009247763 | 0.445569868 |
| smohc222.pcaec381              | -0.02721729  | 0.035577511 | 0.44557909  |
| glutamicacid.smc202            | -0.053153271 | 0.069486864 | 0.44562303  |
| smohc141.glutamine             | -0.011761661 | 0.015376744 | 0.445647098 |
| pcaec425.glutamine             | -0.005687578 | 0.007435904 | 0.445658266 |
| c142.pcaec364                  | 0.025537825  | 0.033389637 | 0.445680605 |
| pcaec323.pcaec341              | 0.031272994  | 0.040898326 | 0.445793792 |
| pcaec360.acetylmethionine      | -0.035174128 | 0.046000277 | 0.445794868 |
| lysopcac180.pcaec301           | 0.02606931   | 0.034093659 | 0.445802152 |
| lysopcac204.c18                | -0.020111883 | 0.026304371 | 0.445834671 |
| pcaec364.c102                  | 0.014739425  | 0.0192787   | 0.445857705 |
| pcaec402.pcaec446              | 0.056026671  | 0.073283255 | 0.445870992 |
| smc180.pcaec444                | 0.059601876  | 0.077981788 | 0.445999873 |
| smc202.pcaec343                | 0.047975491  | 0.062771138 | 0.446007516 |
| pcaec386.c5                    | -0.004662259 | 0.006101255 | 0.446093433 |
| pcaec401.alphaaminoadipicacid  | 0.010338172  | 0.013530205 | 0.44613297  |
| pcaec424.glutamine             | -0.00827267  | 0.010827094 | 0.446138808 |
| c4.methioninesulfoxide         | 0.012474513  | 0.016326824 | 0.446151258 |
| pcaec443.serotonin             | -0.054998234 | 0.071986427 | 0.446176065 |
| pcaec381.asparticacid          | -0.022924244 | 0.030006404 | 0.446193896 |
| c181.pcaec406                  | -0.005140609 | 0.006728965 | 0.446209316 |
| methioninesulfoxide.asparagine | 0.014599685  | 0.019113985 | 0.446286697 |
| pcaec401.phenylalanine         | -0.033216828 | 0.043488388 | 0.446294424 |



|                         |              |             |             |
|-------------------------|--------------|-------------|-------------|
| pcaac322.pcaac320       | -0.031741175 | 0.041558943 | 0.44632193  |
| pcaec382.c16            | 0.013893986  | 0.018193154 | 0.446363351 |
| leucine.pcaec383        | 0.04462586   | 0.058435757 | 0.446374783 |
| c10.pcaec322            | -0.032961049 | 0.043163769 | 0.44640221  |
| lysine.pcaac322         | 0.029862209  | 0.039110715 | 0.446460185 |
| pcaec340.putrescine     | 0.019071225  | 0.024986546 | 0.446620851 |
| pcaac425.prolinr        | -0.027667946 | 0.036260156 | 0.446751496 |
| pcaac365.pcaec383       | -0.05433016  | 0.07120647  | 0.446778366 |
| acetylmithoine.pcaec423 | -0.027554981 | 0.036115222 | 0.446790572 |
| pcaac366.pcaec363       | 0.016103441  | 0.021106261 | 0.44679314  |
| pcaec402.acetylmithoine | -0.018884161 | 0.024752152 | 0.446816788 |
| c182.pcaec445           | -0.042200605 | 0.055328324 | 0.446935377 |
| pcaac342.pcaac422       | -0.01083477  | 0.01420534  | 0.446938597 |
| pcaec444.tyrosine       | -0.027241965 | 0.035720474 | 0.446987515 |
| c141oh.c14              | 0.030666452  | 0.040217213 | 0.447060251 |
| pcaac364.lysopcac161    | -0.050634556 | 0.066437933 | 0.447290604 |
| pcaec343.c51dc          | -0.080930236 | 0.106211922 | 0.447388042 |
| pcaac402.pcaec362       | 0.006343146  | 0.008326943 | 0.447511605 |
| smc241.pcaec405         | -0.015811889 | 0.020763246 | 0.447647917 |
| pcaec404.pcaac406       | 0.02939857   | 0.038607057 | 0.447678192 |
| arginine.methionine     | -0.014908441 | 0.019581677 | 0.44775871  |
| smc160.pcaec402         | -0.027706044 | 0.03639799  | 0.44784762  |
| pcaac323.c162           | -0.053786142 | 0.070670502 | 0.447915318 |
| smc181.pcaac366         | -0.043468788 | 0.057124873 | 0.447998703 |
| pcaac360.pcaac426       | 0.044362657  | 0.058299818 | 0.448000712 |
| alanine.pcaec383        | -0.025414168 | 0.033401543 | 0.44804346  |
| c10.pcaec445            | -0.062373811 | 0.081977892 | 0.448047461 |
| pcaac323.c16            | 0.028912819  | 0.038001601 | 0.448065182 |
| pcaec365.acetylmithoine | -0.032427142 | 0.04262097  | 0.448068518 |
| pcaac380.pcaac321       | -0.020950304 | 0.027539563 | 0.448122826 |
| smc261.creatinine       | 0.005216176  | 0.006857421 | 0.448166438 |
| arginine.c2             | -0.037698112 | 0.049569646 | 0.448257875 |
| pcaec301.pcaec340       | -0.047669442 | 0.062687187 | 0.448302197 |
| smohc222.serine         | -0.012762537 | 0.016784404 | 0.448333686 |
| pcaac240.serotonin      | -0.088669557 | 0.116619119 | 0.448361119 |
| pcaec364.pcaac385       | -0.011206429 | 0.014739492 | 0.448382037 |
| pcaec423.pcaac322       | 0.044687586  | 0.058777728 | 0.448393112 |
| pcaac424.pcaec363       | 0.024544548  | 0.032288525 | 0.448463253 |
| lysopcac204.smc161      | -0.053332745 | 0.070163434 | 0.448487993 |
| arginine.creatinine     | 0.008661744  | 0.011395914 | 0.448516082 |
| pcaec385.smc181         | -0.014563541 | 0.019161115 | 0.448526462 |
| smohc241.c102           | -0.019771268 | 0.026015355 | 0.448569667 |
| pcaec364.pcaec343       | 0.058146827  | 0.0765141   | 0.448590747 |
| lysopcac181.c4          | -0.017426623 | 0.022934968 | 0.44866314  |
| pcaac385.pcaec340       | 0.046764812  | 0.061547008 | 0.448666113 |

|                                    |              |             |             |
|------------------------------------|--------------|-------------|-------------|
| pcaac422.pcaec362                  | 0.007368798  | 0.009698243 | 0.448675166 |
| pcaec363.pcaac343                  | -0.0139569   | 0.018369312 | 0.448682987 |
| lysopcac181.pcaec422               | -0.027821062 | 0.03661715  | 0.448690182 |
| pcaac424.glutamine                 | -0.008941473 | 0.011771039 | 0.448789059 |
| pcaec301.asparticacid              | 0.041573106  | 0.054729305 | 0.448790907 |
| pcaec403.asparticacid              | 0.048110468  | 0.063342995 | 0.448844635 |
| alanine.spermidine                 | 0.041967318  | 0.055271534 | 0.448981469 |
| lysopcac160.alanine                | 0.039049007  | 0.051429426 | 0.448993332 |
| pcaac360.pcaec322                  | 0.076764787  | 0.101107878 | 0.449015486 |
| pcaac401.c4                        | -0.010290491 | 0.013553814 | 0.449018056 |
| pcaec405.pcaec423                  | 0.030459004  | 0.040123332 | 0.449076292 |
| pcaec422.pcaec421                  | 0.003712711  | 0.004890802 | 0.449084264 |
| c142.asparticacid                  | 0.018380619  | 0.024214106 | 0.44910445  |
| pcaac360.smohc241                  | -0.042309425 | 0.055739503 | 0.449122843 |
| pcaac322.pcaec380                  | -0.036289627 | 0.047813512 | 0.449166791 |
| pcaec425.pcaac422                  | -0.016446366 | 0.02167474  | 0.449287446 |
| c2.lysopcac281                     | 0.006835169  | 0.009008856 | 0.449325407 |
| pcaec384.smohc241                  | 0.044378591  | 0.058493856 | 0.449342451 |
| pcaec360.putrescine                | 0.025172165  | 0.033179902 | 0.449360987 |
| pcaac401.smc260                    | -0.023415411 | 0.030864969 | 0.449370907 |
| asymmetricdimethylarginine.asparag | -0.006168876 | 0.008134659 | 0.44954721  |
| smohc222.c5                        | -0.002930377 | 0.003864761 | 0.449615769 |
| pcaac365.lysopcac160               | 0.024182081  | 0.031897411 | 0.449681011 |
| asparticacid.isoleucine            | -0.017800668 | 0.023489486 | 0.449863709 |
| c5.c102                            | 0.026622413  | 0.035135813 | 0.449931787 |
| pcaac380.glycine                   | -0.054120012 | 0.071430945 | 0.44995878  |
| c10.c5                             | -0.006693885 | 0.008835501 | 0.449984208 |
| lysopcac180.creatinine             | 0.003780568  | 0.004990554 | 0.45002458  |
| creatinine.c18                     | -0.020190143 | 0.026654889 | 0.450072242 |
| pcaac381.c12                       | 0.035570374  | 0.046985915 | 0.450323914 |
| pcaac385.c12                       | 0.033289333  | 0.043987539 | 0.450475154 |
| pcaec443.lysopcac161               | 0.043224489  | 0.05712044  | 0.45051377  |
| smc202.c14                         | -0.011354009 | 0.015006149 | 0.450574494 |
| leucine.c8                         | -0.017710689 | 0.023408389 | 0.450591187 |
| lysopcac203.lysopcac280            | 0.004996088  | 0.006603443 | 0.450595706 |
| pcaac363.pcaec401                  | 0.0500306    | 0.06612751  | 0.450601994 |
| c3.isoleucine                      | 0.008789571  | 0.011617592 | 0.450604076 |
| pcaec406.histidine                 | 0.036419533  | 0.048139377 | 0.450622433 |
| c2.pcaac403                        | -0.003294724 | 0.004355334 | 0.450660299 |
| c2.pcaec402                        | -0.026270934 | 0.034732813 | 0.450724764 |
| pcaec402.pcaec422                  | -0.021004627 | 0.027770832 | 0.450734623 |
| c0.pcaec364                        | 0.017474392  | 0.023103818 | 0.450742695 |
| glycine.lysopcac182                | -0.015453057 | 0.020431557 | 0.450748267 |
| pcaac386.threonine                 | 0.01924525   | 0.025448744 | 0.45080629  |
| pcaec342.c3                        | -0.018466278 | 0.024418869 | 0.450809799 |

|                                     |              |             |             |
|-------------------------------------|--------------|-------------|-------------|
| smc180.creatinine                   | 0.005625721  | 0.007439574 | 0.450834497 |
| glycine.c142                        | 0.031773306  | 0.042032311 | 0.450991523 |
| histidine.pcaec446                  | 0.065640022  | 0.086853727 | 0.451094364 |
| pcaec341.pcaac321                   | -0.021522575 | 0.0284805   | 0.451129353 |
| lysopcac281.pcaac362                | 0.016016459  | 0.021195093 | 0.451145407 |
| c8.pcaec401                         | -0.006277233 | 0.008307244 | 0.451166106 |
| pcaec403.c101                       | 0.013208452  | 0.017480879 | 0.451189654 |
| alphaaminoadipicacid.smc181         | 0.019969101  | 0.0264289   | 0.451199222 |
| pcaec445.pcaac420                   | 0.075424339  | 0.099843999 | 0.451292708 |
| pcaac380.smc180                     | -0.012960994 | 0.017158664 | 0.451328817 |
| pcaec300.pcaec301                   | -0.032016698 | 0.042398736 | 0.45146524  |
| pcaec365.glutamine                  | -0.01094833  | 0.014501896 | 0.451569751 |
| pcaec424.phenylalanine              | -0.033851463 | 0.04484749  | 0.451656872 |
| pcaec386.pcaec382                   | -0.010554309 | 0.013984184 | 0.451705361 |
| smc261.pcaec361                     | -0.007646391 | 0.010133163 | 0.451789743 |
| pcaec404.pcaac426                   | 0.050092167  | 0.066393293 | 0.451858195 |
| c182.pcaac320                       | -0.025140783 | 0.033330455 | 0.451970487 |
| citruiline.ornithine                | 0.027074005  | 0.035897521 | 0.452021947 |
| pcaec380.smohc241                   | -0.045395277 | 0.060191573 | 0.452035523 |
| kynurenine.pcaac365                 | 0.03814405   | 0.050584183 | 0.452100902 |
| lysopcac180.pcaec364                | 0.009312635  | 0.012349941 | 0.452105428 |
| pcaac402.glutamine                  | -0.010065558 | 0.013348588 | 0.452110798 |
| c181.pcaec421                       | -0.000658264 | 0.000873    | 0.452128196 |
| smohc222.tyrosine                   | -0.044623264 | 0.059180134 | 0.452128613 |
| h1.asparticacid                     | -0.007785987 | 0.010329184 | 0.452271696 |
| pcaac323.pcaec401                   | -0.017803819 | 0.023619699 | 0.452280891 |
| citruiline.pcaac364                 | -0.024608514 | 0.032649032 | 0.452305561 |
| acetylorithoine.pcaac362            | -0.005003458 | 0.006638546 | 0.452324082 |
| h1.pcaec343                         | 0.035715753  | 0.047389684 | 0.452346163 |
| serotonin.asymmetricdimethylarginir | -0.019696131 | 0.026134465 | 0.452355193 |
| pcaac365.pcaec445                   | -0.031849135 | 0.042267675 | 0.452436238 |
| pcaec404.pcaec422                   | -0.042757076 | 0.056746171 | 0.452454779 |
| c141.pcaec406                       | -0.029256634 | 0.03882897  | 0.452457835 |
| c14.lysopcac140                     | -0.000553854 | 0.000735217 | 0.452550118 |
| pcaac424.smc202                     | -0.047251207 | 0.062727542 | 0.4525761   |
| smohc222.c102                       | 0.015715413  | 0.02086729  | 0.452674665 |
| kynurenine.lysopcac160              | 0.012889845  | 0.017115933 | 0.452687767 |
| c8.pcaac321                         | 0.013162767  | 0.017481533 | 0.45277026  |
| pcaec406.pcaec340                   | -0.046082301 | 0.061205124 | 0.452792393 |
| pcaec402.pcaac362                   | -0.006398458 | 0.008499788 | 0.452874581 |
| pcaec425.pcaac366                   | -0.007965433 | 0.010581428 | 0.452876787 |
| alphaaminoadipicacid.c16            | 0.027390881  | 0.036386782 | 0.452879633 |
| pcaec365.histidine                  | 0.040902104  | 0.054340492 | 0.452921446 |
| c4.valine                           | 0.052124496  | 0.069284923 | 0.453148755 |
| pcaac385.smc180                     | 0.027380582  | 0.036395395 | 0.453155906 |

|                                      |              |             |             |
|--------------------------------------|--------------|-------------|-------------|
| alphaaminoadipicacid.pcaec424        | -0.012838431 | 0.017067155 | 0.453203045 |
| smohc241.pcaac365                    | 0.039519438  | 0.052542699 | 0.453257485 |
| putrescine.asymmetricdimethylargini  | -0.00842779  | 0.011205975 | 0.453293106 |
| pcaac341.lysopcac140                 | 0.000739997  | 0.000984064 | 0.453352888 |
| pcaac342.pcaec342                    | -0.06720585  | 0.08937238  | 0.4533557   |
| smc160.c14                           | -0.017614769 | 0.023425129 | 0.453364812 |
| smc241.smc260                        | -0.024990896 | 0.033239754 | 0.453438431 |
| pcaac404.pcaac426                    | 0.045362928  | 0.060351999 | 0.453557375 |
| c182.pcaac300                        | -0.018233863 | 0.024260807 | 0.453594697 |
| pcaac381.c181                        | 0.020675881  | 0.02751218  | 0.453630413 |
| arginine.pcaac364                    | 0.030468664  | 0.040554868 | 0.453763853 |
| asparticacid.smc261                  | 0.04805429   | 0.063966609 | 0.453796609 |
| kynurenine.pcaec421                  | 0.001166439  | 0.001552894 | 0.453857529 |
| pcaac320.alanine                     | -0.007403376 | 0.009856351 | 0.453864241 |
| lysopcac180.pcaec445                 | 0.037904557  | 0.050468192 | 0.453905695 |
| pcaac380.pcaac344                    | -0.029453034 | 0.039215558 | 0.453907807 |
| pcaac401.prolinr                     | -0.017786048 | 0.023681526 | 0.453909751 |
| lysopcac140.pcaac320                 | -0.044508153 | 0.059261938 | 0.453916016 |
| pcaec405.pcaec401                    | -0.023156561 | 0.030838176 | 0.453997291 |
| creatinine.pcaec342                  | 0.043182909  | 0.057519893 | 0.454092234 |
| alphaaminoadipicacid.methioninesulfi | 0.009725261  | 0.012955686 | 0.454147202 |
| smohc141.pcaec340                    | 0.063560873  | 0.084680272 | 0.45418165  |
| pcaec321.pcaac320                    | 0.081566185  | 0.10871377  | 0.45437039  |
| glutamicacid.pcaac422                | 0.023880735  | 0.031829929 | 0.454384457 |
| pcaac406.pcaac321                    | -0.013124125 | 0.017494312 | 0.454424427 |
| c14.pcaec445                         | -0.04867347  | 0.064883278 | 0.454438882 |
| c102.lysopcac140                     | 0.001356471  | 0.0018083   | 0.454459117 |
| pcaec384.asparagine                  | 0.008136579  | 0.010847304 | 0.454479855 |
| pcaac406.c141                        | -0.015183235 | 0.020245762 | 0.454572984 |
| pcaac365.pcaec386                    | 0.01098134   | 0.014643453 | 0.454591989 |
| pcaac425.c8                          | 0.031580176  | 0.042115989 | 0.454637915 |
| c51.creatinine                       | 0.00496752   | 0.006625504 | 0.454686535 |
| c18.pcaac422                         | 0.024084668  | 0.032123925 | 0.454695424 |
| pcaac402.smc161                      | 0.083178258  | 0.110950416 | 0.454727738 |
| c0.c4                                | 0.011081169  | 0.014783965 | 0.454817122 |
| pcaec380.pcaac381                    | 0.027450931  | 0.036624866 | 0.454831228 |
| creatinine.smc240                    | 0.0244742    | 0.032657138 | 0.454883712 |
| smc180.pcaac281                      | 0.001495736  | 0.001996022 | 0.454925963 |
| lysopcac281.smc261                   | 0.032070047  | 0.042806714 | 0.455031574 |
| pcaac403.pcaac404                    | -0.012353047 | 0.016493848 | 0.455172037 |
| c0.pcaac361                          | -0.030169105 | 0.040282989 | 0.455183842 |
| pcaec365.pcaec380                    | 0.038796114  | 0.051810928 | 0.455260372 |
| lysopcac180.pcaac343                 | 0.009223685  | 0.012319122 | 0.455304057 |
| pcaec422.pcaec362                    | 0.007117844  | 0.009506957 | 0.455322455 |
| c8.pcaac403                          | -0.001829386 | 0.002444538 | 0.455527959 |

|                                    |              |             |             |
|------------------------------------|--------------|-------------|-------------|
| pcaac401.smohc221                  | -0.071961849 | 0.09616896  | 0.455570554 |
| smc161.pcaec405                    | -0.017454494 | 0.023326462 | 0.45557988  |
| pcaac344.pcaec363                  | 0.017842428  | 0.023847588 | 0.455630511 |
| pcaac425.acetylmethionine          | -0.037251137 | 0.049797922 | 0.455714586 |
| pcaac364.c18                       | -0.027903525 | 0.037307224 | 0.455778963 |
| smohc161.smohc141                  | 0.130860577  | 0.174981911 | 0.455831212 |
| c4.c3                              | 0.083372396  | 0.111485203 | 0.455842207 |
| pcaec342.pcaac321                  | -0.016382995 | 0.021911575 | 0.455930571 |
| lysopcac182.c162                   | -0.050031318 | 0.06692457  | 0.45599615  |
| pcaec446.lysopcac140               | 0.001501291  | 0.002008596 | 0.456083263 |
| pcaec342.pcaac421                  | 0.010827362  | 0.014487151 | 0.456116936 |
| pcaac362.serine                    | -0.008041212 | 0.0107617   | 0.45621947  |
| isoleucine.c51dc                   | 0.092103666  | 0.123272741 | 0.456251292 |
| c14.arginine                       | 0.020169205  | 0.026994966 | 0.456255279 |
| smc160.creatinine                  | 0.004306178  | 0.005763515 | 0.456256841 |
| pcaac361.pcaec422                  | 0.009949997  | 0.013317379 | 0.456257199 |
| pcaec422.arginine                  | 0.0387829    | 0.051918073 | 0.456342508 |
| serotonin.pcaac421                 | 0.007886747  | 0.010561861 | 0.456512481 |
| smc260.pcaec385                    | -0.021403374 | 0.028663607 | 0.45651875  |
| c101.lysopcac203                   | -0.004854501 | 0.006502148 | 0.456584672 |
| putrescine.pcaac321                | -0.008782593 | 0.01176582  | 0.456674801 |
| c101.pcaac422                      | 0.00746864   | 0.010006287 | 0.456707926 |
| lysopcac161.glutamicacid           | 0.032784987  | 0.043927435 | 0.456738313 |
| asymmetricdimethylarginine.lysopca | 0.007097766  | 0.009511436 | 0.45680411  |
| pcaac281.c3                        | -0.014354183 | 0.019236003 | 0.456816448 |
| methionine.c51dc                   | 0.072003763  | 0.096494435 | 0.456827524 |
| pcaec446.glutamine                 | -0.012425592 | 0.016652374 | 0.45683995  |
| methionine.pcaac240                | 0.013139829  | 0.017609948 | 0.456849521 |
| pcaec444.pcaec364                  | 0.012240416  | 0.016404662 | 0.456852399 |
| smc241.serine                      | -0.01601503  | 0.021464373 | 0.456872381 |
| lysopcac182.pcaac380               | 0.032920977  | 0.044128029 | 0.456925516 |
| pcaec321.pcaac366                  | -0.005055763 | 0.006776868 | 0.45692607  |
| citruiline.pcaac405                | 0.018964239  | 0.025421953 | 0.456958297 |
| glutamicacid.c101                  | 0.009307524  | 0.012482231 | 0.457149142 |
| kynurenine.c51                     | -0.037362335 | 0.050114232 | 0.45722051  |
| smc240.lysopcac203                 | -0.007232554 | 0.009702345 | 0.457280433 |
| pcaec444.lysopcac161               | 0.032110428  | 0.043076667 | 0.457291765 |
| lysine.pcaac240                    | 0.008437532  | 0.011319977 | 0.457327028 |
| pcaec404.pcaac422                  | -0.059968111 | 0.08047374  | 0.457434247 |
| creatinine.pcaec405                | -0.031449107 | 0.042207245 | 0.457480636 |
| pcaec300.glutamicacid              | -0.028485396 | 0.038232282 | 0.457510886 |
| smc241.pcaec420                    | 0.010060303  | 0.013502926 | 0.457520062 |
| pcaec423.lysopcac280               | 0.0066432    | 0.008917661 | 0.45757876  |
| pcaac320.pcaac344                  | -0.053795013 | 0.072215843 | 0.457596173 |
| smc261.pcaec446                    | -0.013024234 | 0.017484759 | 0.457613717 |

|                        |              |             |             |
|------------------------|--------------|-------------|-------------|
| c18.taurine            | -0.023959371 | 0.032167238 | 0.457645665 |
| c182.methionine        | -0.020976294 | 0.02816889  | 0.457751715 |
| c16.smohc222           | -0.007305111 | 0.009811339 | 0.457814236 |
| pcaac403.tyrosine      | -0.038877257 | 0.052215355 | 0.457815424 |
| arginine.glutamine     | -0.004680175 | 0.006286361 | 0.457851146 |
| pcaec384.glycine       | 0.019559952  | 0.026275784 | 0.457903541 |
| lysopcac281.pcaac323   | 0.084009095  | 0.112855012 | 0.457910409 |
| pcaec401.pcaac424      | -0.00573786  | 0.007709029 | 0.457967434 |
| arginine.pcaec340      | -0.035862689 | 0.048183241 | 0.457970969 |
| c141.pcaac343          | -0.016073815 | 0.021596181 | 0.457975967 |
| pcaac320.pcaac362      | -0.005807068 | 0.007803788 | 0.458069536 |
| c14.pcaec321           | -0.039220766 | 0.052718669 | 0.458172637 |
| pcaac361.pcaac364      | 0.03495417   | 0.046991621 | 0.458248115 |
| smohc141.kynurenine    | -0.002977694 | 0.004003546 | 0.458292885 |
| smc241.pcaec444        | 0.064755871  | 0.087067382 | 0.45830482  |
| smohc222.pcaec385      | -0.034115232 | 0.045880885 | 0.458415453 |
| pcaac404.smc202        | 0.03128136   | 0.042097733 | 0.458714522 |
| glycine.pcaac425       | -0.039515329 | 0.05318279  | 0.458747999 |
| putrescine.pcaec401    | 0.01061472   | 0.014286273 | 0.458753035 |
| c3.pcaac322            | 0.024250222  | 0.032640695 | 0.45878741  |
| smc181.pcaec422        | -0.039423693 | 0.053064981 | 0.458794653 |
| smc261.c162            | 0.046297374  | 0.06231926  | 0.458810365 |
| lysopcac161.spermidine | -0.04730961  | 0.063682975 | 0.458818674 |
| pcaec364.creatinine    | -0.023294252 | 0.03136023  | 0.458876997 |
| c5.pcaac422            | 0.024317072  | 0.032739185 | 0.45890394  |
| pcaec422.ornithine     | -0.021274457 | 0.028643407 | 0.458913854 |
| smc180.smc160          | -0.070529582 | 0.09496034  | 0.45891878  |
| asparticacid.smohc141  | -0.023517901 | 0.031664566 | 0.458922944 |
| pcaec405.pcaec362      | 0.007955192  | 0.010711734 | 0.458958189 |
| pcaac421.pcaac240      | -0.012990384 | 0.017495185 | 0.45904841  |
| pcaec446.putrescine    | -0.029374537 | 0.039561644 | 0.459055383 |
| pcaec403.pcaec445      | 0.044688577  | 0.060186779 | 0.459056698 |
| pcaac424.pcaac362      | -0.012273184 | 0.016534368 | 0.459186514 |
| pcaec321.pcaac386      | -0.009217716 | 0.012419383 | 0.459234349 |
| ornithine.pcaec424     | 0.002946572  | 0.003970499 | 0.459287205 |
| pcaac365.phenylalanine | 0.016467879  | 0.022195068 | 0.459380961 |
| pcaec403.smc260        | -0.024488529 | 0.033010969 | 0.459460165 |
| smc202.lysopcac281     | -0.007650549 | 0.010314888 | 0.459538891 |
| c4.asparticacid        | -0.023646323 | 0.031900637 | 0.459811036 |
| glutamicacid.c142      | 0.037930123  | 0.05117173  | 0.459821467 |
| c10.pcaec384           | -0.026389845 | 0.035603801 | 0.459835579 |
| pcaac401.smc161        | 0.060142454  | 0.08114596  | 0.459862619 |
| pcaac323.pcaac421      | 0.01846513   | 0.024914653 | 0.459879854 |
| c4.smc161              | 0.063550363  | 0.085765621 | 0.459975473 |
| pcaac365.pcaec422      | 0.018504312  | 0.024974466 | 0.460004422 |

|                               |              |             |             |
|-------------------------------|--------------|-------------|-------------|
| pcaac321.alphaaminoadipicacid | 0.007251842  | 0.009787508 | 0.460004958 |
| pcaec424.tyrosine             | -0.028785351 | 0.038858758 | 0.460101454 |
| pcaac425.pcaec362             | 0.006464663  | 0.00872957  | 0.460234999 |
| pcaec364.glutamine            | -0.009946404 | 0.013434291 | 0.460339838 |
| c0.pcaec382                   | 0.004569353  | 0.006171702 | 0.460341494 |
| pcaec340.pcaec383             | -0.048413859 | 0.065408097 | 0.460456498 |
| citruline.c12                 | -0.024814922 | 0.033528624 | 0.460498756 |
| smc180.pcaac364               | 0.029192884  | 0.039457985 | 0.460658565 |
| pcaec421.transhydroxyproline  | 0.027007411  | 0.036505458 | 0.460676032 |
| pcaec404.c51                  | -0.063183534 | 0.085406349 | 0.460687771 |
| asparagine.pcaac321           | -0.01374648  | 0.018586443 | 0.460809898 |
| pcaec405.pcaac362             | -0.009886161 | 0.01336727  | 0.460820468 |
| pcaec362.smc240               | -0.01926435  | 0.026051889 | 0.460892403 |
| c8.lysine                     | 0.041011319  | 0.055462069 | 0.460900101 |
| pcaac404.pcaec301             | 0.040191236  | 0.054371876 | 0.46105526  |
| c0.putrescine                 | -0.018926321 | 0.025604552 | 0.461063524 |
| pcaac366.lysopcac280          | 0.006922313  | 0.009364937 | 0.461066259 |
| c51dc.smc261                  | 0.032173696  | 0.043530306 | 0.461104493 |
| c51.asparticacid              | 0.010913647  | 0.014766373 | 0.461118041 |
| c2.smc260                     | 0.012778035  | 0.017290881 | 0.46116865  |
| pcaac321.lysopcac182          | -0.01330538  | 0.018004498 | 0.46116937  |
| pcaec421.pcaec362             | 0.00686815   | 0.00929439  | 0.461197573 |
| pcaac380.pcaec383             | 0.052493469  | 0.071040885 | 0.461220189 |
| c8.pcaac323                   | 0.077932702  | 0.105469416 | 0.461224016 |
| pcaec404.pcaec322             | 0.030440427  | 0.041198561 | 0.461249247 |
| pcaec425.pcaec362             | 0.00706901   | 0.009568272 | 0.461294192 |
| pcaac321.valine               | 0.040549931  | 0.054887891 | 0.461306007 |
| smc260.c4                     | 0.015770881  | 0.021353794 | 0.461442614 |
| smc161.c51                    | -0.028842772 | 0.03905838  | 0.461502468 |
| pcaac321.asparticacid         | -0.023584185 | 0.03193882  | 0.461523843 |
| c101.pcaac384                 | 0.02377829   | 0.032203219 | 0.461545117 |
| c102.c12                      | -0.040208041 | 0.054458672 | 0.461581639 |
| pcaac300.pcaec401             | 0.046413267  | 0.06287404  | 0.461658938 |
| c18.lysopcac281               | 0.014599754  | 0.019782478 | 0.461767993 |
| c18.smc180                    | -0.008804652 | 0.011931718 | 0.461825236 |
| pcaec406.alanine              | -0.00857215  | 0.011616864 | 0.461833839 |
| pcaec300.pcaec363             | 0.031592672  | 0.042815672 | 0.461851599 |
| c5.pcaec364                   | -0.024849954 | 0.033677755 | 0.461852771 |
| c16.ornithine                 | -0.017039732 | 0.023094173 | 0.461875546 |
| pcaac425.smc160               | -0.037114208 | 0.050304161 | 0.461900284 |
| smc240.lysopcac204            | 0.019441973  | 0.026352668 | 0.461921442 |
| pcaec445.glutamine            | -0.016956891 | 0.022985449 | 0.461944593 |
| serotonin.pcaac364            | -0.02876069  | 0.039008301 | 0.462202832 |
| smc240.asparagine             | -0.004859357 | 0.006591076 | 0.462223183 |
| pcaec404.pcaec340             | -0.034433061 | 0.046713572 | 0.462315685 |

|                         |              |             |             |
|-------------------------|--------------|-------------|-------------|
| pcaac323.pcaac426       | 0.048444521  | 0.065724204 | 0.462329293 |
| pcaac404.pcaac341       | 0.005476548  | 0.007431233 | 0.46240467  |
| lysopcac182.lysopcac140 | 0.006169453  | 0.00837211  | 0.46243996  |
| pcaec363.c102           | 0.014212159  | 0.019289607 | 0.462517169 |
| pcaac425.ornithine      | -0.022583159 | 0.030655398 | 0.46257779  |
| pcaac384.pcaac422       | -0.029798405 | 0.040455685 | 0.462643897 |
| pcaec364.pcaac420       | 0.023086422  | 0.031343205 | 0.462644141 |
| pcaec401.pcaac320       | -0.076635647 | 0.104044209 | 0.462644445 |
| c10.c101                | 0.012895754  | 0.017508747 | 0.4626663   |
| pcaac364.glutamine      | -0.005203801 | 0.007065691 | 0.462692684 |
| c10.pcaac404            | 0.002885353  | 0.003918281 | 0.462757035 |
| lysine.pcaac323         | 0.059065936  | 0.080220464 | 0.462809996 |
| pcaec381.pcaec384       | -0.027278033 | 0.037051929 | 0.462861089 |
| putrescine.lysopcac281  | -0.008670536 | 0.011783693 | 0.463105469 |
| pcaec300.smohc141       | 0.023349165  | 0.031737292 | 0.46317023  |
| pcaec342.pcaec364       | -0.010468093 | 0.014229031 | 0.463179707 |
| pcaec405.lysopcac170    | -0.006677128 | 0.00907666  | 0.463209138 |
| pcaec362.pcaec383       | -0.043058683 | 0.058536759 | 0.463241576 |
| h1.lysopcac180          | 0.073081018  | 0.09935988  | 0.463281185 |
| pcaac402.pcaec361       | 0.006476664  | 0.008806467 | 0.463326277 |
| pcaec322.pcaac365       | -0.035889055 | 0.048803608 | 0.463366932 |
| acetylmithoine.tyrosine | 0.034710101  | 0.047207245 | 0.46343153  |
| pcaec365.smc161         | -0.037451525 | 0.050937945 | 0.463451197 |
| pcaac364.pcaac343       | -0.01247706  | 0.016970647 | 0.4634658   |
| pcaac401.pcaec385       | -0.037857789 | 0.051495236 | 0.463492184 |
| c101.c18                | -0.020490429 | 0.02787556  | 0.463554605 |
| smohc221.c16            | 0.019888864  | 0.027059021 | 0.463584966 |
| pcaac362.pcaac321       | -0.015976693 | 0.021737541 | 0.463606951 |
| c5.pcaac384             | -0.029814399 | 0.040567039 | 0.463631339 |
| c16.lysine              | 0.040717927  | 0.055403152 | 0.463632946 |
| c141oh.c16              | 0.025360763  | 0.034508194 | 0.463644339 |
| pcaec384.pcaac421       | 0.016832926  | 0.02290497  | 0.463654837 |
| pcaac320.smc160         | 0.043088025  | 0.058632133 | 0.463664061 |
| pcaac380.smc261         | 0.022859843  | 0.031115495 | 0.463791805 |
| lysopcac140.prolinr     | -0.024687216 | 0.033604981 | 0.463820652 |
| pcaec361.creatinine     | 0.003198727  | 0.004354908 | 0.463892841 |
| pcaac344.pcaec403       | 0.046922793  | 0.063890476 | 0.463944635 |
| smc160.serine           | -0.011729559 | 0.01597284  | 0.463994125 |
| glutamine.c101          | -0.00668821  | 0.009108161 | 0.464015053 |
| pcaec385.pcaec403       | -0.024116302 | 0.032846784 | 0.464077999 |
| pcaec363.arginine       | -0.027803018 | 0.037869146 | 0.46408973  |
| pcaac300.pcaac366       | -0.010503165 | 0.014306581 | 0.464112422 |
| pcaac426.pcaac406       | 0.051516823  | 0.070172926 | 0.464117409 |
| smohc221.putrescine     | 0.017736368  | 0.024162253 | 0.464171019 |
| lysopcac204.pcaec342    | -0.044214413 | 0.060235181 | 0.464185008 |



|                                    |              |             |             |
|------------------------------------|--------------|-------------|-------------|
| c0.pcaec406                        | 0.005891062  | 0.008025685 | 0.464187221 |
| pcaec322.alphaaminoadipicacid      | 0.017657059  | 0.024055669 | 0.464198056 |
| c182.c3                            | 0.051267512  | 0.069847404 | 0.464207258 |
| pcaec425.histidine                 | 0.0501541    | 0.068343267 | 0.464290696 |
| glutamine.c141oh                   | 0.052073489  | 0.070968394 | 0.464351263 |
| c16.pcaec423                       | 0.026962682  | 0.036746533 | 0.464356379 |
| pcaec341.ornithine                 | -0.025285828 | 0.034463756 | 0.464389381 |
| pcaac321.lysopcac204               | -0.007097766 | 0.009674023 | 0.464389428 |
| kynurenine.c4                      | -0.01095711  | 0.014934532 | 0.464399795 |
| asymmetricdimethylarginine.pcaec30 | 0.032078156  | 0.043733213 | 0.464509021 |
| pcaac422.pcaac384                  | 0.026132086  | 0.035627536 | 0.464519006 |
| c18.kynurenine                     | 0.002692684  | 0.003671736 | 0.464595247 |
| isoleucine.pcaac383                | -0.006647222 | 0.009065796 | 0.464677122 |
| smc180.smc161                      | 0.056605475  | 0.077207455 | 0.46471306  |
| pcaac405.pcaec380                  | 0.02687668   | 0.036666501 | 0.464808545 |
| asparagine.c18                     | 0.027087882  | 0.036957259 | 0.464840187 |
| c4.pcaec364                        | -0.01803764  | 0.024616972 | 0.464973799 |
| lysopcac181.smc260                 | -0.020970495 | 0.028624628 | 0.465052028 |
| asymmetricdimethylarginine.pcaec38 | 0.028371665  | 0.038733031 | 0.465119194 |
| c5.smc180                          | -0.020779838 | 0.028370189 | 0.465143205 |
| smc240.pcaac421                    | -0.017255537 | 0.023559285 | 0.465157098 |
| lysopcac170.pcaec445               | 0.014736919  | 0.020121718 | 0.465182471 |
| alanine.lysopcac204                | -0.01191506  | 0.016268773 | 0.465182685 |
| c101.lysopcac182                   | 0.025092341  | 0.034263457 | 0.465214928 |
| asymmetricdimethylarginine.pcaec40 | -0.019904574 | 0.027183602 | 0.465280692 |
| pcaac420.isoleucine                | -0.010030212 | 0.013699389 | 0.465318603 |
| c16.pcaec402                       | -0.021693694 | 0.029635442 | 0.465407631 |
| smc181.smc161                      | 0.056788323  | 0.077580392 | 0.465423034 |
| pcaec406.pcaec365                  | -0.015332819 | 0.020954912 | 0.465598265 |
| smohc141.lysopcac161               | 0.041154742  | 0.056245145 | 0.465599626 |
| pcaec406.tyrosine                  | 0.039267041  | 0.053677353 | 0.465699854 |
| glutamine.pcaac421                 | -0.005361234 | 0.007329166 | 0.465727399 |
| pcaac385.pcaac406                  | 0.018181482  | 0.024861864 | 0.465844887 |
| pcaac300.putrescine                | 0.015510966  | 0.021212123 | 0.465886795 |
| pcaec422.pcaac405                  | -0.049174642 | 0.067260687 | 0.465963445 |
| pcaac343.serine                    | -0.012950258 | 0.017716501 | 0.466044856 |
| arginine.putrescine                | 0.027408407  | 0.037510282 | 0.466215971 |
| smc181.pcaac405                    | -0.047628714 | 0.065189676 | 0.466260473 |
| glycine.smc202                     | -0.030922911 | 0.042324582 | 0.466262876 |
| pcaac422.pcaec380                  | 0.071026948  | 0.097216442 | 0.466267241 |
| c12.tyrosine                       | 0.024415158  | 0.033419573 | 0.466292645 |
| pcaac364.lysopcac204               | -0.008654723 | 0.011848299 | 0.466355653 |
| spermidine.isoleucine              | 0.052923404  | 0.072482334 | 0.4665416   |
| pcaec300.tyrosine                  | 0.025789485  | 0.035328572 | 0.466642999 |
| ornithine.pcaec382                 | -0.005717685 | 0.007833577 | 0.466700857 |

|                                    |              |             |             |
|------------------------------------|--------------|-------------|-------------|
| pcaec381.c162                      | 0.057637191  | 0.078985343 | 0.466807144 |
| smc240.pcaac402                    | 0.04859924   | 0.066612432 | 0.466891216 |
| smc241.alanine                     | -0.006659306 | 0.009127795 | 0.466902562 |
| acetylmethionine.c182              | -0.05218056  | 0.071528247 | 0.466935271 |
| smc202.pcaec342                    | 0.046102922  | 0.063199557 | 0.466952406 |
| pcaec300.pcaac444                  | 0.072526074  | 0.099423169 | 0.46696045  |
| pcaac403.pcaac421                  | 0.022503812  | 0.030849938 | 0.46696533  |
| c101.pcaec301                      | -0.028068163 | 0.038481514 | 0.467006237 |
| pcaec364.pcaec341                  | 0.066075836  | 0.090611377 | 0.467110547 |
| lysopcac161.pcaec402               | -0.019532756 | 0.026789797 | 0.467177948 |
| pcaec381.c102                      | -0.03164933  | 0.043409615 | 0.467193821 |
| pcaec422.pcaac320                  | -0.073408253 | 0.100685538 | 0.467194625 |
| pcaec300.smc261                    | 0.034373774  | 0.047150005 | 0.467227705 |
| smc202.pcaac426                    | -0.033620221 | 0.046127048 | 0.467330637 |
| c182.pcaec421                      | -0.000929005 | 0.001274711 | 0.467370156 |
| lysopcac140.smc160                 | 0.044146904  | 0.060583132 | 0.467429253 |
| pcaec444.c101                      | -0.018847292 | 0.025875012 | 0.467613557 |
| smohc241.isoleucine                | 0.010165932  | 0.013959455 | 0.467705266 |
| pcaac403.pcaac366                  | -0.016540493 | 0.022715591 | 0.467760855 |
| serine.pcaec401                    | 0.040247075  | 0.055284962 | 0.467860182 |
| pcaec382.pcaec301                  | 0.062191071  | 0.085434852 | 0.467895309 |
| pcaac385.pcaec301                  | 0.042071666  | 0.057820273 | 0.468082851 |
| pcaec420.c4                        | -0.023746427 | 0.032636144 | 0.468093231 |
| pcaac404.pcaac366                  | -0.010023055 | 0.013775325 | 0.468094414 |
| lysopcac161.pcaac380               | 0.029417238  | 0.040430487 | 0.468099884 |
| pcaac384.c5                        | -0.003092125 | 0.004250131 | 0.468138983 |
| pcaec381.pcaac385                  | -0.014939839 | 0.020535004 | 0.468142634 |
| lysopcac161.pcaec423               | 0.021880393  | 0.030078058 | 0.468189435 |
| smohc141.transhydroxyproline       | -0.014121375 | 0.019420857 | 0.468390558 |
| acetylmethionine.c162              | 0.050208556  | 0.069058546 | 0.46843994  |
| pcaac383.alphaaminoadipicacid      | 0.002759261  | 0.003795293 | 0.468453081 |
| pcaac323.glutamicacid              | 0.030482501  | 0.041930486 | 0.468480413 |
| lysopcac160.pcaac240               | -0.011873382 | 0.016333237 | 0.468499369 |
| pcaec322.glutamicacid              | 0.039993934  | 0.055022517 | 0.468548928 |
| pcaac405.asymmetricdimethylarginir | -0.012495357 | 0.017192551 | 0.468595252 |
| pcaac425.pcaec382                  | 0.007488663  | 0.010304383 | 0.468621849 |
| pcaac425.pcaac424                  | -0.005583834 | 0.00768394  | 0.468656368 |
| c142.pcaac404                      | 0.001443311  | 0.001986487 | 0.468732397 |
| smc202.creatinine                  | 0.003980398  | 0.005478504 | 0.468742203 |
| h1.lysopcac204                     | 0.029232252  | 0.040235506 | 0.4687542   |
| pcaac321.pcaac343                  | -0.025414994 | 0.034984748 | 0.468796658 |
| pcaec401.pcaec301                  | 0.044527376  | 0.061294548 | 0.468802783 |
| c141oh.lysopcac182                 | -0.015800889 | 0.021751074 | 0.468807328 |
| pcaec365.pcaac406                  | 0.029338312  | 0.04039307  | 0.468881463 |
| pcaac403.lysopcac140               | 0.001249253  | 0.001720216 | 0.468943769 |

|                              |              |             |             |
|------------------------------|--------------|-------------|-------------|
| lysopcac180.lysopcac203      | -0.008567    | 0.011798278 | 0.469002127 |
| pcaec321.pcaac362            | -0.002933978 | 0.004040835 | 0.469027139 |
| pcaec420.pcaac343            | 0.032320296  | 0.044532089 | 0.469214475 |
| pcaec420.pcaec364            | 0.008839678  | 0.01217979  | 0.46922024  |
| pcaec446.pcaec343            | -0.042126516 | 0.0580567   | 0.469315641 |
| pcaac421.lysopcac170         | 0.025176306  | 0.034702015 | 0.469382917 |
| lysopcac204.pcaac344         | 0.03976749   | 0.054814102 | 0.469384388 |
| h1.pcaec423                  | 0.039728367  | 0.054791786 | 0.469640277 |
| lysopcac182.putrescine       | 0.035589808  | 0.04908428  | 0.46964236  |
| c12.histidine                | 0.034589392  | 0.047710447 | 0.469697251 |
| pcaac360.c101                | -0.013973    | 0.019273927 | 0.469707441 |
| c51.pcaec401                 | -0.011239658 | 0.015504983 | 0.469745898 |
| lysopcac170.serine           | -0.040357222 | 0.055694368 | 0.469921251 |
| pcaac240.smc202              | -0.044793067 | 0.061825614 | 0.469990263 |
| pcaac421.pcaac420            | -0.156257747 | 0.215686557 | 0.470014633 |
| pcaac425.pcaec322            | -0.041183799 | 0.056847064 | 0.470014748 |
| pcaec402.pcaac366            | -0.010339981 | 0.014273188 | 0.47003474  |
| pcaec340.pcaec403            | -0.007049073 | 0.00973121  | 0.470069083 |
| pcaac342.c0                  | -0.000333703 | 0.000460719 | 0.470111763 |
| pcaac281.pcaac360            | -0.031711156 | 0.043782866 | 0.470127478 |
| pcaec404.lysopcac203         | 0.009905854  | 0.013677158 | 0.470139545 |
| arginine.pcaec362            | 0.008770956  | 0.012110292 | 0.470143362 |
| lysopcac181.pcaac300         | -0.027153326 | 0.037494504 | 0.470181016 |
| smohc241.serine              | -0.011876655 | 0.016400463 | 0.470198742 |
| pcaec401.glutamine           | -0.004613292 | 0.006371086 | 0.470240116 |
| pcaac365.c102                | 0.022173645  | 0.030622473 | 0.470240795 |
| pcaac361.pcaec444            | 0.058426927  | 0.080724715 | 0.470434929 |
| c0.pcaac321                  | 0.020440962  | 0.028246085 | 0.470499663 |
| pcaac381.pcaac361            | -0.035915858 | 0.049637622 | 0.470568784 |
| lysopcac160.c14              | 0.022089729  | 0.030539235 | 0.470714653 |
| pcaec386.methioninesulfoxide | 0.008717016  | 0.012051956 | 0.470737051 |
| c182.pcaec406                | -0.004656012 | 0.006437322 | 0.470738496 |
| smohc221.pcaec341            | 0.033521009  | 0.046351936 | 0.470799325 |
| histidine.c16                | 0.025443263  | 0.035192734 | 0.470931262 |
| c18.pcaac366                 | -0.031387695 | 0.043417579 | 0.470957742 |
| pcaac386.histidine           | 0.027399472  | 0.037901789 | 0.470969305 |
| lysopcac160.pcaac281         | -0.003011157 | 0.004166342 | 0.471075407 |
| asparagine.lysopcac280       | 0.005655298  | 0.007825487 | 0.47111032  |
| glutamine.c16                | -0.023220919 | 0.032138082 | 0.471196649 |
| pcaac380.c102                | 0.019915381  | 0.027564513 | 0.471218205 |
| smohc141.lysopcac180         | 0.046140064  | 0.063874051 | 0.47130438  |
| pcaac365.putrescine          | 0.031787911  | 0.04400674  | 0.471315522 |
| smohc241.pcaac323            | -0.053566801 | 0.07418651  | 0.471490808 |
| c14.serotonin                | 0.024891678  | 0.034475114 | 0.471513549 |
| pcaac321.pcaac426            | 0.051499695  | 0.0713296   | 0.471527388 |

|                                    |              |             |             |
|------------------------------------|--------------|-------------|-------------|
| lysopcac181.pcaec380               | -0.023870437 | 0.03307451  | 0.471698448 |
| c0.pcaac383                        | -0.005339155 | 0.007397875 | 0.471699873 |
| h1.acetylmethionine                | 0.053002257  | 0.073439638 | 0.471701621 |
| c51.lysopcac170                    | -0.005297728 | 0.007340798 | 0.47171941  |
| pcaec424.lysopcac204               | -0.018792251 | 0.026040063 | 0.471729177 |
| pcaac366.prolinr                   | 0.029619243  | 0.041048587 | 0.471791347 |
| leucine.tyrosine                   | -0.048601771 | 0.06735643  | 0.471794108 |
| pcaac424.pcaec362                  | 0.00717233   | 0.009941057 | 0.471840284 |
| pcaac406.arginine                  | -0.02494647  | 0.034578166 | 0.471861205 |
| pcaec363.pcaec401                  | 0.049125333  | 0.068095015 | 0.471878488 |
| pcaec382.smc260                    | -0.027379934 | 0.037954246 | 0.47189697  |
| alanine.c101                       | 0.006974019  | 0.00966899  | 0.471968283 |
| lysopcac170.pcaec401               | -0.039665724 | 0.054995668 | 0.471983661 |
| pcaac342.asparagine                | 0.004185964  | 0.005804369 | 0.47203099  |
| pcaac385.c5                        | -0.004725133 | 0.006553171 | 0.472110326 |
| c4.h1                              | -0.000896442 | 0.001243381 | 0.47215548  |
| c141oh.pcaac421                    | -0.007386928 | 0.010245963 | 0.472162724 |
| creatinine.c12                     | -0.012429227 | 0.017240511 | 0.472180091 |
| asymmetricdimethylarginine.pcaec42 | 0.002019929  | 0.002801878 | 0.472187427 |
| lysopcac161.pcaec445               | 0.069337723  | 0.09618088  | 0.472193488 |
| pcaac422.pcaec383                  | 0.038390789  | 0.053253446 | 0.472195021 |
| prolinr.acetylmethionine           | 0.030142434  | 0.041815434 | 0.472233316 |
| pcaac360.c14                       | -0.06061864  | 0.084096032 | 0.472244537 |
| pcaac425.smohc141                  | -0.01044804  | 0.01449762  | 0.472338788 |
| pcaec361.c162                      | -0.052480896 | 0.07282442  | 0.472352934 |
| pcaac403.c51dc                     | -0.096968373 | 0.134574111 | 0.47240954  |
| kynurenine.pcaac403                | -0.01040513  | 0.014445294 | 0.47255962  |
| c141.smc240                        | 0.018500054  | 0.025686437 | 0.472612548 |
| asparagine.pcaac360                | -0.017760083 | 0.024659285 | 0.472617235 |
| smohc141.serine                    | -0.008924381 | 0.012392291 | 0.472655925 |
| smc241.lysopcac182                 | -0.028467073 | 0.039529391 | 0.472659791 |
| isoleucine.pcaec420                | -0.026809224 | 0.037228703 | 0.472676434 |
| pcaac343.pcaac426                  | 0.055791688  | 0.077476744 | 0.47268478  |
| asparticacid.glycine               | -0.010014344 | 0.013907025 | 0.472694793 |
| c8.ornithine                       | 0.023327437  | 0.032399346 | 0.472753313 |
| c3.glycine                         | 0.015876669  | 0.022051095 | 0.472754885 |
| pcaec443.pcaac404                  | -0.008535976 | 0.011858968 | 0.472879971 |
| asparticacid.pcaac322              | 0.015415746  | 0.021418817 | 0.472917824 |
| c8.smohc141                        | 0.034994888  | 0.048627988 | 0.472969468 |
| c142.pcaac422                      | 0.011590538  | 0.016109169 | 0.473058834 |
| pcaac426.tyrosine                  | 0.040614976  | 0.056459546 | 0.47314186  |
| acetylmethionine.c18               | -0.032181423 | 0.044753562 | 0.473315951 |
| lysopcac203.smc202                 | -0.032753313 | 0.045549859 | 0.473325547 |
| pcaec385.lysopcac280               | 0.006199448  | 0.008622007 | 0.47334952  |
| isoleucine.lysopcac170             | -0.005506364 | 0.00765815  | 0.473353192 |

|                                    |              |             |             |
|------------------------------------|--------------|-------------|-------------|
| c51dc.c4                           | -0.009653466 | 0.013426037 | 0.473358857 |
| pcaec363.pcaec403                  | 0.029022531  | 0.0403725   | 0.473446088 |
| pcaac322.c2                        | 0.046907154  | 0.065257396 | 0.473487054 |
| pcaac381.pcaac404                  | -0.006134586 | 0.008534505 | 0.473489543 |
| pcaec405.asparagine                | 0.011124036  | 0.015477307 | 0.473530091 |
| smc181.pcaec385                    | -0.030236164 | 0.042071769 | 0.473561699 |
| lysopcac280.pcaec382               | -0.005047316 | 0.007024381 | 0.473646502 |
| pcaac281.pcaec365                  | 0.015569785  | 0.021669395 | 0.473663445 |
| pcaac364.c14                       | 0.024322325  | 0.033852637 | 0.473687075 |
| pcaec384.tyrosine                  | -0.044072519 | 0.061346155 | 0.473719657 |
| c18.c101                           | -0.002009544 | 0.002797544 | 0.473780485 |
| c2.pcaac385                        | -0.021937571 | 0.030542663 | 0.47382014  |
| acetylmithoine.smohc241            | -0.042706626 | 0.059463296 | 0.473856085 |
| smc241.lysopcac181                 | 0.034056167  | 0.047425198 | 0.473916726 |
| phenylalanine.c101                 | 0.007774022  | 0.010825872 | 0.473920483 |
| c12.pcaec385                       | -0.031745045 | 0.044216538 | 0.474013657 |
| pcaec446.pcaac361                  | 0.03650336   | 0.050860073 | 0.474151182 |
| arginine.serine                    | 0.032410922  | 0.045159615 | 0.474166124 |
| pcaec402.pcaec425                  | -0.022320245 | 0.031102534 | 0.474204688 |
| asparticacid.lysopcac281           | -0.008977842 | 0.012510878 | 0.474223996 |
| methioninesulfoxide.c2             | 0.095415138  | 0.132968908 | 0.474241264 |
| pcaec301.pcaec401                  | 0.015700406  | 0.02188696  | 0.474385233 |
| c5.tyrosine                        | 0.066316651  | 0.092468009 | 0.474481067 |
| pcaac420.lysopcac160               | -0.013313958 | 0.018567242 | 0.474553477 |
| pcaec365.pcaac405                  | -0.018712454 | 0.026099333 | 0.47461281  |
| pcaac342.h1                        | 0.001135477  | 0.001583778 | 0.474630391 |
| lysopcac281.smohc141               | 0.019761318  | 0.027563631 | 0.474635    |
| pcaec404.pcaec342                  | 0.048085047  | 0.067098737 | 0.474821597 |
| pcaac386.pcaac424                  | -0.009734958 | 0.013585823 | 0.474869893 |
| pcaec421.glutamine                 | -0.006025949 | 0.008410289 | 0.474903983 |
| prolinr.pcaec403                   | 0.029513202  | 0.041192682 | 0.474922527 |
| asymmetricdimethylarginine.pcaac34 | 0.020507093  | 0.028627161 | 0.474994026 |
| pcaec382.pcaac385                  | -0.016629    | 0.023213504 | 0.474994426 |
| glutamicacid.smohc161              | 0.010504761  | 0.014665088 | 0.475018698 |
| pcaec406.pcaec403                  | -0.010549518 | 0.014731751 | 0.475143789 |
| pcaec404.c16                       | 0.012906762  | 0.018024587 | 0.475170479 |
| glycine.pcaac405                   | 0.010460258  | 0.014608774 | 0.475194182 |
| arginine.pcaec365                  | -0.012757015 | 0.017819321 | 0.475265917 |
| pcaac420.lysopcac182               | -0.015136133 | 0.02114317  | 0.475279191 |
| pcaac366.pcaac402                  | -0.032697459 | 0.045674298 | 0.475281928 |
| alphaaminoadipicacid.lysopcac182   | -0.013232685 | 0.018486886 | 0.475340701 |
| pcaec322.pcaac424                  | -0.007391999 | 0.01032861  | 0.475405777 |
| pcaec382.pcaac366                  | -0.011941529 | 0.016687538 | 0.475458933 |
| c3.c162                            | -0.06143096  | 0.085848236 | 0.475470836 |
| kynurenine.smohc141                | -0.021357649 | 0.029847679 | 0.47548408  |

|                                    |              |             |             |
|------------------------------------|--------------|-------------|-------------|
| h1.ornithine                       | -0.038586137 | 0.05392895  | 0.4755181   |
| pcaec341.arginine                  | -0.025626288 | 0.035822175 | 0.475594763 |
| pcaec445.lysopcac160               | -0.004444987 | 0.006213548 | 0.47559777  |
| smc241.pcaac385                    | -0.008967689 | 0.012536076 | 0.475609841 |
| c5.creatinine                      | 0.00967131   | 0.01352065  | 0.475641465 |
| pcaec365.pcaec382                  | -0.006338845 | 0.008862624 | 0.475681897 |
| ornithine.creatinine               | 0.006120091  | 0.008558693 | 0.475780722 |
| lysopcac181.pcaec402               | -0.015496276 | 0.021672074 | 0.475804602 |
| spermidine.pcaac281                | -0.006947028 | 0.009715796 | 0.475810865 |
| pcaec361.pcaac386                  | -0.018598052 | 0.026010762 | 0.475817244 |
| pcaac320.pcaac300                  | -0.055991045 | 0.078321895 | 0.475897355 |
| pcaec405.lysopcac203               | 0.015468748  | 0.021638957 | 0.475914135 |
| pcaac424.pcaec424                  | 0.026056134  | 0.036454973 | 0.475980677 |
| lysopcac180.pcaec341               | 0.022543263  | 0.031542869 | 0.476018832 |
| pcaec446.pcaac381                  | 0.013424251  | 0.018784102 | 0.476034991 |
| pcaac344.smc261                    | 0.023877538  | 0.033419179 | 0.47614232  |
| c141oh.citruline                   | -0.02139724  | 0.029948127 | 0.476148058 |
| h1.tryptophan                      | -0.022409858 | 0.031367503 | 0.476177399 |
| pcaac323.pcaac344                  | -0.029079795 | 0.040708123 | 0.476226958 |
| lysopcac140.pcaec385               | 0.022217903  | 0.031105343 | 0.476269714 |
| pcaec384.c14                       | -0.024801722 | 0.034722979 | 0.476272984 |
| pcaec301.pcaac323                  | -0.038188901 | 0.053471165 | 0.476320965 |
| pcaec365.pcaec322                  | 0.057678673  | 0.080762952 | 0.476335594 |
| pcaac361.taurine                   | 0.032232448  | 0.045138528 | 0.476393529 |
| pcaec421.lysopcac170               | -0.029915301 | 0.041898744 | 0.476447777 |
| smc181.pcaec424                    | -0.009647673 | 0.013512483 | 0.476452797 |
| lysopcac181.pcaac323               | -0.063914272 | 0.089520878 | 0.476466888 |
| asparticacid.smc260                | 0.023254014  | 0.032575589 | 0.476535647 |
| leucine.c3                         | 0.016363222  | 0.022922702 | 0.476538325 |
| lysopcac181.serotonin              | -0.062489269 | 0.087544292 | 0.476564065 |
| asymmetricdimethylarginine.pcaec32 | -0.031709648 | 0.044432443 | 0.476651582 |
| pcaec423.smc240                    | -0.028992663 | 0.040631592 | 0.476719425 |
| pcaec301.smc261                    | -0.021199806 | 0.029714883 | 0.476786698 |
| pcaec361.pcaac426                  | 0.045363202  | 0.06358666  | 0.476807124 |
| lysopcac281.c12                    | 0.031999145  | 0.04485766  | 0.476843514 |
| pcaec343.lysopcac203               | -0.01659234  | 0.023260404 | 0.476855044 |
| smohc241.creatinine                | 0.005204996  | 0.007297598 | 0.476905655 |
| c12.lysine                         | 0.03533213   | 0.049537222 | 0.476907916 |
| pcaac381.pcaec342                  | 0.061012442  | 0.085548314 | 0.476939543 |
| arginine.pcaec405                  | 0.032425519  | 0.045465796 | 0.476944424 |
| asparagine.lysopcac180             | 0.02967913   | 0.041628128 | 0.477084028 |
| pcaec403.pcaac365                  | -0.032808287 | 0.046017835 | 0.477091019 |
| pcaac381.glutamine                 | -0.009003858 | 0.012629597 | 0.47710949  |
| lysine.leucine                     | 0.015128658  | 0.02122359  | 0.477167787 |
| pcaec381.pcaac320                  | -0.050067091 | 0.070245087 | 0.47721351  |

|                                     |              |             |             |
|-------------------------------------|--------------|-------------|-------------|
| lysopcac203.c16                     | 0.0378912    | 0.053166025 | 0.477246141 |
| pcaac381.ornithine                  | -0.019232563 | 0.026985712 | 0.477247055 |
| pcaac445.pcaac363                   | 0.005948352  | 0.008346509 | 0.477258655 |
| smc180.putrescine                   | 0.01502484   | 0.021082453 | 0.477261794 |
| pcaac405.pcaac240                   | -0.007927194 | 0.011124033 | 0.477293684 |
| leucine.smc202                      | 0.032506538  | 0.045617158 | 0.477308581 |
| pcaec321.pcaec422                   | -0.008616179 | 0.012093272 | 0.477381091 |
| serine.pcaec363                     | 0.014428179  | 0.020252956 | 0.477429452 |
| pcaec301.prolinr                    | -0.014380568 | 0.020187179 | 0.477452426 |
| glycine.histidine                   | 0.021213758  | 0.029780363 | 0.477465356 |
| c102.pcaac300                       | -0.063574623 | 0.089262548 | 0.477539355 |
| methioninesulfoxide.pcaec361        | 0.003548864  | 0.004983541 | 0.477603333 |
| c10.lysopcac170                     | -0.015919248 | 0.022357437 | 0.477654704 |
| pcaac404.pcaec402                   | -0.020443097 | 0.028712498 | 0.477679819 |
| smc161.pcaac240                     | -0.005965922 | 0.008379188 | 0.477679903 |
| asparagine.pcaac366                 | 0.014556529  | 0.020446672 | 0.477720828 |
| asymmetricdimethylarginine.aspartic | 0.01466028   | 0.020595155 | 0.477779521 |
| pcaec422.lysopcac140                | 0.000855684  | 0.001202108 | 0.477786851 |
| lysopcac281.pcaec422                | -0.011763072 | 0.016527579 | 0.477845977 |
| pcaac406.pcaec386                   | 0.008738762  | 0.012279231 | 0.477879106 |
| pcaac402.serine                     | 0.068031089  | 0.095595034 | 0.477885863 |
| lysine.methioninesulfoxide          | 0.010633008  | 0.014941502 | 0.477896193 |
| lysopcac140.smc241                  | 0.01253376   | 0.017612488 | 0.477897422 |
| c18.pcaec301                        | -0.015396687 | 0.021639703 | 0.477983105 |
| pcaac402.pcaac425                   | 0.098992322  | 0.139133335 | 0.477988822 |
| smohc222.smc180                     | -0.035574698 | 0.050003887 | 0.478022058 |
| pcaac386.smc241                     | 0.016652919  | 0.023409884 | 0.478068949 |
| smohc241.c14                        | 0.018219485  | 0.025613341 | 0.47809044  |
| pcaac363.pcaac383                   | -0.00507397  | 0.007134254 | 0.478161769 |
| smohc141.putrescine                 | 0.014820227  | 0.020841503 | 0.478236117 |
| pcaac420.pcaec380                   | 0.034703646  | 0.048805752 | 0.478258091 |
| pcaac386.pcaac364                   | -0.026610196 | 0.037427287 | 0.478302965 |
| c0.c101                             | 0.010970838  | 0.015432021 | 0.478346154 |
| pcaac300.ornithine                  | -0.014503091 | 0.020400691 | 0.478347501 |
| pcaec343.pcaec383                   | -0.036484943 | 0.051322333 | 0.478355987 |
| pcaac406.valine                     | -0.030170785 | 0.042440661 | 0.478358834 |
| pcaac342.creatinine                 | 0.004487917  | 0.006313841 | 0.478412736 |
| asymmetricdimethylarginine.c4       | -0.010257483 | 0.014430996 | 0.478419501 |
| pcaac425.pcaec401                   | 0.019811343  | 0.027876775 | 0.478493397 |
| pcaec403.pcaac421                   | 0.011419431  | 0.016071261 | 0.478571119 |
| c102.serine                         | 0.011263186  | 0.015854809 | 0.478666392 |
| pcaac401.lysopcac161                | 0.047442281  | 0.066784776 | 0.478678702 |
| smc240.pcaec380                     | 0.028992011  | 0.040815336 | 0.478712175 |
| pcaac366.putrescine                 | 0.037363373  | 0.0526026   | 0.478728459 |
| pcaac341.alphaaminoadipicacid       | 0.003629999  | 0.005110704 | 0.478741699 |

|                                |              |             |             |
|--------------------------------|--------------|-------------|-------------|
| c182.pcaec362                  | 0.009257607  | 0.013034677 | 0.478769257 |
| isoleucine.methioninesulfoxide | 0.012573675  | 0.017705108 | 0.478804485 |
| pcaec404.pcaac362              | -0.007554686 | 0.010638509 | 0.478832766 |
| smc181.pcaec340                | -0.020699529 | 0.029150282 | 0.478850919 |
| c10.tyrosine                   | 0.041564533  | 0.058539125 | 0.478892368 |
| pcaec301.smohc161              | 0.003941721  | 0.005552084 | 0.478939615 |
| pcaac385.pcaac421              | -0.01991726  | 0.028056625 | 0.478975763 |
| serotonin.pcaac361             | 0.030208619  | 0.042557813 | 0.479018794 |
| pcaac342.smohc222              | -0.004330076 | 0.00610117  | 0.479088708 |
| asparagine.c141                | -0.0252387   | 0.035563442 | 0.479108084 |
| pcaec401.pcaec444              | 0.097826764  | 0.137869495 | 0.479182537 |
| pcaec401.pcaac322              | 0.042022061  | 0.059223477 | 0.479188657 |
| pcaac420.pcaac281              | 0.001170649  | 0.001649952 | 0.479217003 |
| lysopcac170.smc180             | 0.006148826  | 0.008666538 | 0.47922594  |
| pcaac320.asparagine            | 0.003341291  | 0.004710205 | 0.479298798 |
| c5.lysopcac170                 | -0.018988323 | 0.026769308 | 0.479323992 |
| glutamicacid.pcaac426          | 0.075758382  | 0.10680259  | 0.479324565 |
| lysopcac204.threonine          | 0.022717725  | 0.032031756 | 0.479390036 |
| pcaac366.pcaac425              | -0.076389221 | 0.107709042 | 0.479394242 |
| pcaec382.h1                    | 0.002126018  | 0.002997864 | 0.479419461 |
| c181.c101                      | -0.003741082 | 0.005276691 | 0.479540064 |
| smc202.pcaac384                | -0.024388763 | 0.034406099 | 0.479622055 |
| lysopcac181.c141oh             | 0.0496896    | 0.070109957 | 0.479691253 |
| pcaac300.pcaec364              | -0.009043635 | 0.012760859 | 0.479714159 |
| pcaac420.pcaac381              | 0.026658794  | 0.037616817 | 0.479718867 |
| citruiline.pcaac426            | -0.027836431 | 0.039278557 | 0.479719294 |
| pcaac365.lysopcac204           | -0.010737459 | 0.015151378 | 0.479728024 |
| c4.pcaec444                    | -0.033234134 | 0.04692067  | 0.479959423 |
| pcaec386.ornithine             | -0.01278521  | 0.018050628 | 0.479964094 |
| pcaac342.lysopcac280           | 0.00832987   | 0.011762374 | 0.480037046 |
| pcaac281.pcaec343              | 0.047529578  | 0.067116831 | 0.480047881 |
| pcaac426.glutamine             | -0.004574865 | 0.006460455 | 0.480065351 |
| h1.pcaec321                    | -0.009725232 | 0.013734566 | 0.480095806 |
| lysopcac140.pcaac300           | -0.032693224 | 0.046172657 | 0.480108067 |
| c5.pcaec424                    | 0.013293121  | 0.01877646  | 0.480168269 |
| pcaec401.pcaec380              | -0.053507921 | 0.0755835   | 0.480190615 |
| pcaac300.smc160                | 0.031343346  | 0.044299321 | 0.480435594 |
| pcaec380.lysopcac170           | -0.005434921 | 0.007682436 | 0.480490068 |
| pcaec422.pcaec423              | 0.069009829  | 0.097581906 | 0.480644013 |
| pcaac426.pcaec405              | -0.030630367 | 0.043320304 | 0.480725659 |
| pcaec382.pcaec402              | -0.102123532 | 0.144435595 | 0.480734848 |
| c10.smc161                     | -0.031074729 | 0.043953144 | 0.480769321 |
| citruiline.pcaec444            | 0.064052041  | 0.090629033 | 0.48092237  |
| pcaec425.pcaec401              | -0.017635866 | 0.024954009 | 0.480931604 |
| pcaac403.pcaac362              | -0.009710225 | 0.013740623 | 0.48096547  |



|                               |              |             |             |
|-------------------------------|--------------|-------------|-------------|
| c12.pcaec422                  | 0.021399765  | 0.030285298 | 0.481011561 |
| pcaec340.asparagine           | 0.003746525  | 0.005302428 | 0.481035093 |
| pcaac365.pcaac386             | -0.017728775 | 0.025097928 | 0.481148954 |
| pcaac321.pcaac404             | 0.00220669   | 0.003124088 | 0.481172083 |
| c101.smc260                   | 0.01728434   | 0.02447339  | 0.481231818 |
| lysopcac161.threonine         | 0.012934806  | 0.018316038 | 0.481262322 |
| c0.pcaac381                   | 0.013148421  | 0.018620641 | 0.481312111 |
| h1.pcaec446                   | -0.040887969 | 0.057905565 | 0.481315895 |
| pcaec424.pcaec340             | -0.026328023 | 0.037292463 | 0.481394561 |
| pcaac380.smohc141             | -0.023745715 | 0.033636017 | 0.481411173 |
| pcaac362.pcaac426             | 0.028438735  | 0.040284692 | 0.481421723 |
| lysopcac160.pcaac426          | -0.040225683 | 0.057004621 | 0.481599923 |
| pcaac300.pcaac422             | -0.024462257 | 0.034666025 | 0.481600809 |
| pcaac300.lysopcac182          | -0.010334011 | 0.014644722 | 0.481605549 |
| smc181.c5                     | -0.002941505 | 0.004168768 | 0.481631587 |
| asparticacid.pcaac362         | 0.004989868  | 0.007072745 | 0.481692929 |
| pcaac402.pcaec363             | 0.019972705  | 0.028330002 | 0.482005911 |
| pcaac384.pcaac343             | -0.013554592 | 0.019228258 | 0.482049999 |
| pcaac381.lysopcac161          | 0.035476832  | 0.050328611 | 0.482066744 |
| smc240.pcaac343               | 0.012944922  | 0.018364923 | 0.482086421 |
| pcaac363.pcaac381             | -0.03554483  | 0.050432118 | 0.482127814 |
| pcaec365.ornithine            | -0.016203367 | 0.022991254 | 0.482154614 |
| pcaec380.pcaec383             | 0.074884362  | 0.106262224 | 0.482185202 |
| lysopcac204.glutamine         | -0.006718211 | 0.009534095 | 0.482223536 |
| pcaec402.h1                   | 0.001681479  | 0.002386285 | 0.482228742 |
| pcaec443.smc181               | 0.004842059  | 0.006871877 | 0.482243136 |
| smc161.tyrosine               | -0.035582944 | 0.050502307 | 0.482267328 |
| smc241.valine                 | 0.047030781  | 0.066757568 | 0.482316625 |
| pcaec403.tyrosine             | -0.03424264  | 0.048612041 | 0.482375313 |
| pcaac424.putrescine           | -0.051116329 | 0.072575031 | 0.482426606 |
| pcaac406.pcaec382             | -0.004677867 | 0.006641827 | 0.482438752 |
| c2.c4                         | -0.021380704 | 0.030359366 | 0.482470001 |
| smc161.smohc222               | 0.007489823  | 0.010635333 | 0.482478883 |
| smohc221.pcaec362             | 0.024419555  | 0.034677782 | 0.482513158 |
| smc160.putrescine             | 0.018665092  | 0.026506138 | 0.48251594  |
| pcaac361.serine               | -0.009719112 | 0.013804262 | 0.482586662 |
| pcaac343.glycine              | -0.059585451 | 0.084646872 | 0.482671266 |
| pcaec321.pcaec385             | -0.027850463 | 0.039572353 | 0.482760597 |
| pcaac422.c18                  | -0.023426582 | 0.033288416 | 0.4827855   |
| c8.asymmetricdimethylarginine | 0.005584816  | 0.007935949 | 0.482791284 |
| smc260.putrescine             | 0.009537257  | 0.013554617 | 0.482865547 |
| h1.lysopcac161                | 0.025503032  | 0.036246794 | 0.482879641 |
| pcaac343.c16                  | 0.020436212  | 0.02905012  | 0.482949797 |
| pcaec421.pcaec401             | 0.030761327  | 0.043738664 | 0.483063373 |
| c102.kynurenine               | -0.003344727 | 0.004755856 | 0.483070989 |

|                                    |              |             |             |
|------------------------------------|--------------|-------------|-------------|
| smc180.c102                        | 0.015629894  | 0.022224149 | 0.483072084 |
| pcaec405.pcaac402                  | -0.06724316  | 0.095616573 | 0.483088134 |
| pcaec386.pcaac322                  | 0.031581683  | 0.04491531  | 0.483162633 |
| pcaec406.c16                       | 0.032484037  | 0.046200887 | 0.483183933 |
| c14.spermidine                     | 0.037777517  | 0.053730335 | 0.483189789 |
| pcaac421.pcaac366                  | -0.012268911 | 0.017451366 | 0.483227271 |
| serine.pcaec445                    | 0.027645953  | 0.039326647 | 0.483259391 |
| pcaac240.asymmetricdimethylarginir | -0.021157253 | 0.030103984 | 0.483369344 |
| pcaec446.pcaac422                  | -0.009559762 | 0.013603828 | 0.48341898  |
| smc202.transhydroxyproline         | 0.016331614  | 0.023242348 | 0.483455997 |
| pcaec321.lysopcac204               | -0.01276255  | 0.018163341 | 0.483463426 |
| pcaec383.glutamicacid              | 0.057378287  | 0.081665289 | 0.483495233 |
| pcaec385.pcaec444                  | -0.051302491 | 0.073017959 | 0.48349655  |
| c18.pcaac361                       | 0.031186723  | 0.044389941 | 0.483520253 |
| asparticacid.pcaec422              | -0.027901285 | 0.039717058 | 0.483558506 |
| pcaac406.pcaac362                  | 0.029024233  | 0.041331686 | 0.483728873 |
| leucine.lysopcac182                | -0.016386245 | 0.023335331 | 0.483741099 |
| lysopcac160.creatinine             | 0.003161987  | 0.004503087 | 0.483756928 |
| glutamicacid.pcaec423              | 0.026283453  | 0.037432119 | 0.483768698 |
| pcaac383.pcaac366                  | -0.032553645 | 0.046377541 | 0.483915513 |
| c51dc.c142                         | -0.027239544 | 0.038811209 | 0.483964981 |
| pcaac341.creatinine                | 0.003988598  | 0.005683026 | 0.483967021 |
| pcaec420.transhydroxyproline       | 0.012049852  | 0.017170225 | 0.484002108 |
| arginine.kynurenine                | -0.018145598 | 0.025857194 | 0.484017998 |
| asparagine.smc160                  | 0.044512193  | 0.063437415 | 0.484074647 |
| pcaec423.lysopcac170               | 0.007650301  | 0.010903374 | 0.484090648 |
| pcaac366.c12                       | 0.035388794  | 0.050440414 | 0.484121255 |
| pcaec380.smc261                    | 0.024613685  | 0.035082791 | 0.484125893 |
| pcaec421.pcaec361                  | 0.006305404  | 0.008987615 | 0.484140005 |
| pcaac281.pcaac240                  | -0.007973168 | 0.011369261 | 0.4843105   |
| c18.pcaac343                       | 0.010288485  | 0.014673109 | 0.48438022  |
| pcaec425.pcaac362                  | -0.004369719 | 0.006232013 | 0.484384399 |
| pcaac405.pcaac365                  | -0.027320059 | 0.038964365 | 0.48439555  |
| pcaec341.pcaac385                  | -0.017019101 | 0.024276655 | 0.484462086 |
| c8.pcaec342                        | 0.039416867  | 0.056225813 | 0.484463502 |
| pcaec383.pcaec423                  | 0.017144223  | 0.02445693  | 0.484494115 |
| pcaec363.c51                       | -0.035717302 | 0.05095589  | 0.484525865 |
| c0.c2                              | -0.042479653 | 0.060605208 | 0.484539155 |
| pcaac383.alanine                   | 0.01472292   | 0.021008236 | 0.484606078 |
| pcaac360.lysopcac280               | 0.004756395  | 0.006790089 | 0.484808799 |
| pcaac366.lysopcac161               | 0.040956847  | 0.058473797 | 0.48484614  |
| pcaac380.c51dc                     | -0.068156165 | 0.097311707 | 0.484871398 |
| pcaac321.pcaec340                  | -0.047104711 | 0.0672575   | 0.484887892 |
| smc241.h1                          | 0.00195887   | 0.002798134 | 0.485075071 |
| glutamicacid.pcaec403              | 0.023627482  | 0.033753413 | 0.485112561 |

|                              |              |             |             |
|------------------------------|--------------|-------------|-------------|
| pcaec386.pcaec402            | 0.027816012  | 0.039739278 | 0.485137501 |
| lysopcac160.pcaec402         | -0.012950267 | 0.018503946 | 0.485198232 |
| pcaac342.c101                | -0.011025906 | 0.015757504 | 0.485286018 |
| pcaec381.pcaac321            | 0.008434015  | 0.01205345  | 0.485289909 |
| smohc161.lysopcac140         | -0.00041531  | 0.000593544 | 0.485294236 |
| pcaec340.taurine             | 0.034254255  | 0.048957496 | 0.485317646 |
| pcaec402.pcaac425            | 0.058455941  | 0.083561531 | 0.485390938 |
| pcaac420.pcaec406            | 0.009063322  | 0.01295739  | 0.485443473 |
| phenylalanine.lysopcac204    | -0.016875186 | 0.024132803 | 0.48557295  |
| pcaac300.glutamicacid        | -0.02420623  | 0.034620342 | 0.485618068 |
| c51dc.pcaec363               | 0.017425646  | 0.024923329 | 0.485631073 |
| c51dc.pcaac366               | -0.013413949 | 0.019186441 | 0.485651744 |
| pcaec383.pcaec340            | -0.032326069 | 0.04624072  | 0.485685755 |
| smohc241.serotonin           | 0.049699036  | 0.071098359 | 0.485725777 |
| smc161.serine                | -0.017382511 | 0.024867573 | 0.485735081 |
| smc261.c51                   | -0.025127423 | 0.03594893  | 0.485752254 |
| pcaec425.pcaec424            | 0.026314101  | 0.037653684 | 0.485833392 |
| pcaac240.pcaac405            | -0.031826013 | 0.045543441 | 0.485858112 |
| smohc161.c101                | -0.00996042  | 0.014254399 | 0.485885868 |
| lysopcac160.pcaec341         | 0.024009757  | 0.034361217 | 0.485895362 |
| glycine.pcaec383             | -0.02832521  | 0.040538853 | 0.485912966 |
| pcaec420.smc240              | 0.013792638  | 0.019740363 | 0.485922454 |
| lysine.serotonin             | 0.064877415  | 0.092861622 | 0.48595748  |
| asparticacid.smc161          | 0.037758126  | 0.054054788 | 0.486038682 |
| smc240.smc241                | 0.008712949  | 0.012477069 | 0.486162636 |
| pcaec381.pcaac421            | 0.011083566  | 0.015873509 | 0.48620874  |
| smc261.c181                  | -0.011668455 | 0.016716171 | 0.486339042 |
| pcaac240.pcaec423            | 0.027030915  | 0.038725199 | 0.486348513 |
| pcaec340.pcaec301            | -0.029872964 | 0.042801006 | 0.486391346 |
| alanine.smc241               | 0.009465665  | 0.013564246 | 0.486460329 |
| c16.pcaac380                 | 0.038390845  | 0.055016502 | 0.486481154 |
| pcaec342.transhydroxyproline | 0.0183155    | 0.026254605 | 0.486602777 |
| pcaac426.methioninesulfoxide | -0.035058792 | 0.050258882 | 0.486631988 |
| pcaac320.phenylalanine       | -0.028709401 | 0.041157784 | 0.486643975 |
| isoleucine.smc160            | -0.024987261 | 0.035827042 | 0.486708532 |
| pcaec402.smc240              | -0.020906816 | 0.029976982 | 0.486716239 |
| glutamine.lysopcac204        | -0.011163352 | 0.0160096   | 0.486802257 |
| methionine.c101              | 0.005589888  | 0.008018479 | 0.486905441 |
| pcaac361.pcaec300            | 0.011370332  | 0.016314763 | 0.487024299 |
| pcaac240.pcaec405            | -0.049210965 | 0.070610723 | 0.487025434 |
| pcaac424.pcaac403            | 0.011237482  | 0.016124699 | 0.48703927  |
| pcaac366.smohc241            | -0.035726644 | 0.051279015 | 0.487164248 |
| pcaec443.pcaac422            | -0.051246232 | 0.073566265 | 0.487233633 |
| pcaac363.serine              | -0.00868695  | 0.012472322 | 0.487296912 |
| kynurenine.pcaac322          | -0.03290232  | 0.047240959 | 0.487309121 |

|                              |              |             |             |
|------------------------------|--------------|-------------|-------------|
| pcaac385.pcaec362            | -0.015705432 | 0.022550979 | 0.487332458 |
| pcaec444.pcaac366            | -0.004529848 | 0.006505064 | 0.487384934 |
| pcaec406.glutamine           | -0.007768871 | 0.011157718 | 0.487434509 |
| pcaac344.creatinine          | 0.01657881   | 0.023815893 | 0.487530607 |
| c51.lysopcac182              | 0.009201682  | 0.013220119 | 0.487585275 |
| smohc141.pcaac321            | -0.010642465 | 0.015290365 | 0.487592744 |
| pcaac365.lysopcac203         | -0.014338881 | 0.020603689 | 0.487646847 |
| pcaec380.pcaac402            | -0.034268656 | 0.049249708 | 0.487723763 |
| pcaec322.c4                  | -0.008793994 | 0.012639232 | 0.48775172  |
| pcaec403.pcaac321            | 0.005727193  | 0.008231464 | 0.487752442 |
| pcaac321.pcaac422            | -0.045867923 | 0.065926047 | 0.487765141 |
| alphaaminoadipicacid.smc161  | 0.028084499  | 0.040366385 | 0.487770362 |
| c12.pcaec382                 | -0.008860833 | 0.01273615  | 0.487780808 |
| pcaec402.pcaac321            | 0.011745611  | 0.016884077 | 0.487818894 |
| histidine.c3                 | 0.034352939  | 0.049386608 | 0.487862509 |
| lysopcac280.asparagine       | 0.005367167  | 0.00771603  | 0.487866026 |
| c2.c14                       | 0.050870913  | 0.073135169 | 0.487873943 |
| lysopcac140.pcaac403         | 0.004403005  | 0.00633054  | 0.487908821 |
| c181.pcaac425                | 0.029146416  | 0.041908828 | 0.487937571 |
| smohc141.lysopcac281         | -0.013934631 | 0.02003793  | 0.487974581 |
| pcaac406.lysopcac170         | 0.004393256  | 0.006319471 | 0.488111465 |
| pcaac322.pcaac383            | -0.003967211 | 0.005707549 | 0.488181616 |
| lysine.pcaec365              | -0.010343313 | 0.014883001 | 0.488248002 |
| pcaec322.pcaac323            | -0.034876418 | 0.050188132 | 0.488286319 |
| pcaec403.transhydroxyproline | 0.047243516  | 0.067998766 | 0.48837595  |
| pcaac421.glutamine           | -0.006949099 | 0.010002893 | 0.488414227 |
| smc260.smc160                | -0.045249252 | 0.06513694  | 0.488433054 |
| smc161.putrescine            | 0.017603952  | 0.025342323 | 0.488453344 |
| ornithine.pcaac343           | 0.007635335  | 0.010992994 | 0.488504927 |
| c5.arginine                  | -0.042279314 | 0.06088864  | 0.488625331 |
| serine.c51                   | -0.028134112 | 0.040527784 | 0.488736534 |
| c141.pcaec446                | -0.016158903 | 0.023285793 | 0.488895894 |
| pcaac341.lysopcac204         | -0.007630974 | 0.010997188 | 0.488918431 |
| c4.pcaac361                  | -0.041556867 | 0.059888878 | 0.48892009  |
| ornithine.pcaec445           | 0.022291411  | 0.032129457 | 0.488982473 |
| pcaac381.lysopcac140         | 0.000845346  | 0.001218445 | 0.488988413 |
| pcaac342.pcaac366            | -0.007904497 | 0.011393377 | 0.488994862 |
| lysopcac281.pcaec401         | 0.018327139  | 0.026417606 | 0.489015386 |
| pcaac420.pcaac380            | -0.064691171 | 0.093250958 | 0.489024882 |
| pcaec365.pcaac425            | 0.045057135  | 0.064958522 | 0.489089076 |
| putrescine.c16               | -0.020704829 | 0.02985684  | 0.489188575 |
| phenylalanine.pcaac383       | -0.006430397 | 0.009275195 | 0.489301483 |
| pcaac343.ornithine           | 0.034040361  | 0.049103134 | 0.489331223 |
| pcaac406.c16                 | 0.01924347   | 0.027761598 | 0.489377155 |
| pcaec301.pcaec341            | -0.035215643 | 0.050806263 | 0.489397685 |

|                                       |              |             |             |
|---------------------------------------|--------------|-------------|-------------|
| smohc222.spermidine                   | 0.035917074  | 0.051823035 | 0.489437875 |
| pcaec404.pcaec403                     | -0.045554843 | 0.065740774 | 0.489516102 |
| pcaec386.pcaec365                     | -0.019299574 | 0.027851689 | 0.489519655 |
| pcaec423.pcaec363                     | 0.01565895   | 0.022597832 | 0.489519977 |
| c5.pcaec301                           | 0.076817337  | 0.110874902 | 0.489589715 |
| c102.pcaec322                         | 0.046741931  | 0.067470949 | 0.48962581  |
| pcaac344.smohc141                     | 0.031255761  | 0.045119872 | 0.489653369 |
| smc260.pcaec362                       | -0.010557853 | 0.015245438 | 0.489779616 |
| pcaec380.c141oh                       | 0.048944489  | 0.070676581 | 0.489787048 |
| smc261.pcaac406                       | 0.033489485  | 0.048360748 | 0.489799838 |
| pcaec385.serotonin                    | 0.060685746  | 0.087650614 | 0.489883375 |
| smc202.pcaac421                       | 0.018626491  | 0.026904254 | 0.489904953 |
| creatinine.pcaec404                   | 0.016482353  | 0.023811165 | 0.489976323 |
| smc180.pcaec403                       | -0.019518856 | 0.02820088  | 0.490023093 |
| pcaac404.glutamine                    | -0.004237435 | 0.00612301  | 0.490076611 |
| pcaac341.c141oh                       | 0.056796393  | 0.082076888 | 0.49011468  |
| smc180.pcaac360                       | 0.037068152  | 0.053569744 | 0.490133146 |
| smc161.pcaec384                       | -0.057433144 | 0.083008407 | 0.490173893 |
| pcaac363.tyrosine                     | 0.039303221  | 0.056805991 | 0.49018038  |
| pcaec425.creatinine                   | 0.005272654  | 0.007622688 | 0.490292969 |
| glutamine.pcaec301                    | -0.030051268 | 0.04344916  | 0.490332567 |
| pcaec381.smc161                       | 0.058121352  | 0.084074237 | 0.490540597 |
| pcaec365.c4                           | 0.01985033   | 0.028716421 | 0.490575827 |
| pcaec444.kynurenine                   | 0.002808218  | 0.00406346  | 0.490678123 |
| pcaec301.c102                         | -0.020352668 | 0.02945074  | 0.490687785 |
| pcaac421.lysopcac182                  | -0.050490504 | 0.07308097  | 0.49080712  |
| pcaac320.pcaac405                     | 0.03156232   | 0.045691076 | 0.490874753 |
| smohc161.serine                       | -0.015043725 | 0.021779155 | 0.490897837 |
| asparticacid.pcaac366                 | 0.008083802  | 0.011703721 | 0.490920412 |
| c101.pcaec420                         | 0.022425814  | 0.03247685  | 0.491037399 |
| pcaec403.pcaac380                     | 0.040076278  | 0.058039909 | 0.491051011 |
| pcaec422.tyrosine                     | -0.031339617 | 0.045389353 | 0.491071891 |
| serotonin.alphaaminoadipicacid        | 0.005865248  | 0.008495712 | 0.491124782 |
| smohc141.pcaac323                     | 0.06389775   | 0.092555194 | 0.491126618 |
| asymmetricdimethylarginine.creatinini | 0.003219099  | 0.004663028 | 0.491145081 |
| c2.pcaec420                           | 0.012442337  | 0.01802398  | 0.491159993 |
| alanine.glutamine                     | 0.010123006  | 0.014665643 | 0.491202721 |
| lysopcac281.smohc222                  | -0.003596888 | 0.005213274 | 0.491394011 |
| pcaec301.pcaac344                     | 0.048937315  | 0.070944998 | 0.491491583 |
| c2.c18                                | -0.038224557 | 0.055418232 | 0.491520022 |
| smohc161.alanine                      | -0.017186334 | 0.024920915 | 0.491590253 |
| c141.pcaec365                         | -0.017194297 | 0.024935593 | 0.491644566 |
| ornithine.phenylalanine               | -0.031579703 | 0.045797731 | 0.491645202 |
| lysopcac181.pcaac362                  | -0.009752807 | 0.014143974 | 0.491651099 |
| pcaec405.c0                           | -0.001180186 | 0.001711875 | 0.491730633 |

|                        |              |             |             |
|------------------------|--------------|-------------|-------------|
| lysopcac140.pcaac404   | 0.004696632  | 0.00681255  | 0.491732066 |
| pcaec424.pcaec401      | -0.036654876 | 0.053180122 | 0.491826046 |
| c141.lysopcac280       | 0.006632034  | 0.009621989 | 0.491826584 |
| h1.pcaac383            | -0.006032552 | 0.008752493 | 0.491839123 |
| pcaac404.spermidine    | 0.03663264   | 0.053158367 | 0.491911486 |
| pcaec446.pcaac385      | -0.027874226 | 0.040451642 | 0.491941278 |
| glutamicacid.pcaac363  | -0.009236339 | 0.013403996 | 0.491942374 |
| c102.lysopcac170       | 0.013593748  | 0.01972892  | 0.49197189  |
| pcaac402.pcaac362      | -0.008457647 | 0.012276014 | 0.492015426 |
| pcaec421.smc260        | -0.016416274 | 0.023828229 | 0.492024706 |
| pcaac401.pcaac424      | -0.007156847 | 0.010389183 | 0.492066946 |
| pcaac380.creatinine    | -0.006170862 | 0.008959313 | 0.492135867 |
| phenylalanine.pcaec340 | 0.025815803  | 0.037485117 | 0.492179993 |
| pcaac323.pcaec362      | 0.012407778  | 0.018017835 | 0.492215178 |
| pcaec365.c8            | -0.027294319 | 0.039637905 | 0.492244861 |
| pcaec423.pcaec445      | 0.027288151  | 0.039638607 | 0.492350165 |
| c4.tyrosine            | 0.037333873  | 0.054237524 | 0.492402434 |
| pcaec404.pcaec421      | -0.005120255 | 0.007440621 | 0.492522613 |
| smc240.c51dc           | -0.060606416 | 0.088087288 | 0.492599192 |
| pcaec301.tryptophan    | -0.023672216 | 0.0344111   | 0.49266383  |
| pcaac421.c3            | -0.017111648 | 0.024874897 | 0.492673592 |
| pcaec322.pcaac343      | 0.024551645  | 0.035702209 | 0.492817803 |
| pcaec402.pcaec362      | 0.009829365  | 0.01429579  | 0.492885645 |
| pcaec343.pcaec365      | 0.016970696  | 0.024684361 | 0.492924915 |
| c8.pcaec384            | -0.01241752  | 0.018063312 | 0.49296496  |
| leucine.asparagine     | 0.005197717  | 0.007561608 | 0.493003777 |
| pcaec321.creatinine    | 0.007214413  | 0.010496044 | 0.493026743 |
| pcaec321.pcaac424      | -0.01527016  | 0.022219018 | 0.493083005 |
| pcaac365.pcaec401      | 0.037942789  | 0.055210158 | 0.493091429 |
| asparticacid.c51dc     | 0.074666935  | 0.108711047 | 0.493345442 |
| lysopcac160.serine     | -0.023135383 | 0.033687759 | 0.493395188 |
| pcaac322.pcaec301      | -0.039041693 | 0.056856992 | 0.49345461  |
| pcaac420.smc261        | 0.01929863   | 0.028109169 | 0.493520469 |
| pcaac320.pcaec425      | -0.010271671 | 0.014964507 | 0.493619581 |
| c5.smc261              | -0.041684839 | 0.060732253 | 0.493639403 |
| smc202.pcaec322        | -0.07005674  | 0.10207662  | 0.493674257 |
| lysopcac203.pcaac321   | -0.021754005 | 0.031698053 | 0.493691146 |
| pcaac320.pcaac385      | -0.021963653 | 0.032004093 | 0.493698683 |
| pcaec361.asparticacid  | 0.019608011  | 0.028575269 | 0.493754137 |
| pcaec380.pcaec421      | 0.005358445  | 0.007811531 | 0.493893721 |
| c101.c5                | -0.012019714 | 0.017522908 | 0.493908313 |
| c18.pcaac322           | -0.034317922 | 0.050034406 | 0.493943776 |
| smohc222.lysopcac204   | -0.017823455 | 0.02599151  | 0.494034961 |
| pcaec365.pcaec301      | 0.050300219  | 0.073352821 | 0.494042238 |
| c8.lysopcac180         | -0.038754315 | 0.056522189 | 0.49409383  |

|                               |              |             |             |
|-------------------------------|--------------|-------------|-------------|
| pcaec360.lysopcac140          | 0.000876752  | 0.001278752 | 0.494104715 |
| smc260.pcaec322               | -0.046552886 | 0.067906302 | 0.494157915 |
| asparticacid.pcaec380         | 0.050807574  | 0.074113578 | 0.494163721 |
| smohc141.pcaec402             | -0.031443337 | 0.045877678 | 0.49426642  |
| pcaac300.asparagine           | 0.003511959  | 0.005124623 | 0.494305802 |
| pcaec444.c162                 | -0.036900297 | 0.053846606 | 0.494321684 |
| serotonin.c4                  | -0.010856128 | 0.015843612 | 0.494372069 |
| c2.creatinine                 | -0.004634233 | 0.006764759 | 0.494466549 |
| pcaec363.pcaac344             | 0.046596581  | 0.068034241 | 0.494564802 |
| citruline.pcaac320            | -0.035227349 | 0.051434632 | 0.494566969 |
| smc181.pcaec362               | 0.011207159  | 0.016369744 | 0.494736272 |
| pcaec443.pcaec342             | 0.050319461  | 0.073517966 | 0.494846524 |
| pcaac342.c141oh               | 0.048456577  | 0.070799409 | 0.494865758 |
| c142.pcaac385                 | 0.004437796  | 0.006484555 | 0.494901424 |
| pcaac402.lysopcac140          | 0.001490635  | 0.002178145 | 0.494903941 |
| pcaac365.c162                 | -0.043301973 | 0.063283162 | 0.494968488 |
| pcaac381.pcaac422             | 0.028792244  | 0.042081311 | 0.495001463 |
| c181.c5                       | -0.003684174 | 0.0053859   | 0.495104918 |
| lysopcac180.c16               | 0.023013885  | 0.03366137  | 0.495326745 |
| pcaec423.pcaac424             | -0.005948355 | 0.008701652 | 0.495389152 |
| c101.serine                   | 0.006165608  | 0.009020487 | 0.495437952 |
| pcaac364.c8                   | -0.02533252  | 0.037064888 | 0.495467924 |
| pcaac380.serine               | 0.032621733  | 0.047739238 | 0.495551311 |
| pcaec386.creatinine           | -0.012211343 | 0.01787157  | 0.495581864 |
| pcaec363.pcaac321             | -0.017972805 | 0.026303812 | 0.495585367 |
| c12.lysopcac203               | -0.007973419 | 0.011669914 | 0.49560544  |
| alanine.pcaac364              | 0.028852482  | 0.042229506 | 0.495615103 |
| pcaec322.pcaec403             | -0.006932527 | 0.010147756 | 0.495660268 |
| pcaec381.pcaec301             | 0.050600528  | 0.074110631 | 0.495905001 |
| citruline.pcaac383            | 0.009649527  | 0.014133162 | 0.495912781 |
| pcaac341.pcaec363             | -0.01670345  | 0.024465075 | 0.495919748 |
| lysopcac180.c51               | -0.036542066 | 0.053528339 | 0.495969586 |
| lysopcac204.smc160            | 0.036944321  | 0.054118176 | 0.495974334 |
| methioninesulfoxide.glutamine | -0.019594635 | 0.028706798 | 0.496025953 |
| smc240.asparticacid           | 0.012647317  | 0.018532527 | 0.496113753 |
| pcaec362.c14                  | -0.020986009 | 0.030756724 | 0.496186994 |
| pcaec363.glycine              | -0.021506294 | 0.031523058 | 0.496239012 |
| lysopcac160.glycine           | -0.035686072 | 0.052313976 | 0.496294684 |
| pcaec402.pcaec421             | 0.002795955  | 0.004099026 | 0.496325859 |
| pcaec363.pcaac386             | 0.009139323  | 0.013401012 | 0.496398231 |
| c16.c0                        | -0.000578574 | 0.000848407 | 0.496419971 |
| pcaac343.pcaec405             | -0.035211745 | 0.051634554 | 0.496427233 |
| pcaac366.pcaac403             | 0.005928531  | 0.008693818 | 0.49643768  |
| pcaec385.threonine            | 0.017132597  | 0.025126925 | 0.496489857 |
| pcaac365.lysopcac161          | -0.058776825 | 0.086210306 | 0.496526387 |

|                                   |              |             |             |
|-----------------------------------|--------------|-------------|-------------|
| pcaac383.pcaac403                 | 0.002714655  | 0.00398174  | 0.49653153  |
| c162.smc261                       | -0.014158278 | 0.020766908 | 0.496534637 |
| pcaec364.h1                       | -0.001300059 | 0.001907904 | 0.49676445  |
| pcaec300.smc202                   | -0.019833477 | 0.029114798 | 0.49688443  |
| glycine.leucine                   | 0.012199926  | 0.01790941  | 0.496893515 |
| smc180.lysopcac161                | 0.038109146  | 0.055954882 | 0.496977272 |
| pcaec341.glycine                  | 0.024816282  | 0.036439235 | 0.497000779 |
| ornithine.pcaac300                | 0.020264778  | 0.02976455  | 0.49712434  |
| c141.pcaac420                     | 0.038724374  | 0.056887548 | 0.497198854 |
| pcaec321.asparagine               | 0.003336327  | 0.004902424 | 0.497307166 |
| smohc161.creatinine               | 0.003915526  | 0.00575362  | 0.497315791 |
| pcaac403.lysopcac160              | 0.030113277  | 0.044250343 | 0.497323257 |
| smohc161.pcaac380                 | -0.031536093 | 0.046343494 | 0.497345267 |
| arginine.pcaac300                 | -0.026625803 | 0.039129214 | 0.497362604 |
| c4.c102                           | 0.029509913  | 0.04337196  | 0.497404822 |
| pcaec445.serotonin                | 0.074460067  | 0.109438199 | 0.49740917  |
| pcaec381.lysopcac181              | -0.040714639 | 0.059841262 | 0.497413756 |
| pcaac406.pcaac384                 | -0.024831222 | 0.036498462 | 0.497439772 |
| pcaec300.lysopcac203              | 0.009931893  | 0.014599267 | 0.497462055 |
| smc261.asymmetricdimethylarginine | 0.013693178  | 0.020128914 | 0.497478949 |
| histidine.pcaec425                | 0.002575906  | 0.003786608 | 0.497483202 |
| c3.methioninesulfoxide            | 0.007376136  | 0.010843941 | 0.497520583 |
| pcaec363.pcaac425                 | -0.054243601 | 0.079750519 | 0.497547063 |
| isoleucine.pcaec380               | 0.02180759   | 0.032064701 | 0.497581184 |
| asymmetricdimethylarginine.smc160 | -0.051478978 | 0.075703997 | 0.497649747 |
| pcaec365.pcaec403                 | -0.01501204  | 0.022076914 | 0.497659378 |
| pcaac364.pcaac403                 | -0.002520249 | 0.003707462 | 0.497792426 |
| pcaec362.serine                   | -0.011237265 | 0.016531331 | 0.497806191 |
| pcaac405.c5                       | -0.007208771 | 0.010605242 | 0.497818216 |
| pcaac403.pcaac323                 | -0.064726941 | 0.095238882 | 0.497887222 |
| pcaec382.pcaac404                 | -0.009784263 | 0.014399338 | 0.497971381 |
| pcaac404.glycine                  | 0.058571098  | 0.086202451 | 0.497992973 |
| pcaac344.pcaac380                 | -0.020088717 | 0.029567598 | 0.498020224 |
| pcaec380.smc181                   | 0.006210493  | 0.009142429 | 0.498090989 |
| pcaac300.lysopcac281              | 0.006532379  | 0.00961649  | 0.498100646 |
| smc260.transhydroxyproline        | -0.016467264 | 0.024245918 | 0.498171703 |
| pcaac363.pcaac322                 | -0.042498888 | 0.062576917 | 0.498190875 |
| leucine.creatinine                | 0.006520303  | 0.009600964 | 0.498201254 |
| pcaac300.pcaec420                 | 0.028186434  | 0.041508351 | 0.498248896 |
| lysopcac182.serotonin             | -0.05751782  | 0.084756765 | 0.498522029 |
| pcaac421.pcaec362                 | 0.008939857  | 0.013173778 | 0.498529753 |
| pcaec401.pcaac366                 | 0.018545285  | 0.027331829 | 0.498584449 |
| pcaec365.pcaec362                 | -0.014894309 | 0.021951226 | 0.498587635 |
| pcaec386.pcaac424                 | -0.006822634 | 0.010056283 | 0.498634062 |
| smc240.c51                        | -0.031504498 | 0.046436901 | 0.498639212 |



|                                    |              |             |             |
|------------------------------------|--------------|-------------|-------------|
| citruiline.pcaec404                | -0.005907843 | 0.008712007 | 0.498835221 |
| pcaec300.pcaec362                  | -0.009845963 | 0.014520101 | 0.498857117 |
| pcaec443.c4                        | -0.020098754 | 0.029641449 | 0.498875712 |
| pcaec365.lysopcac203               | -0.008672065 | 0.012790807 | 0.498920253 |
| smc261.c101                        | 0.005921948  | 0.008736261 | 0.49900467  |
| pcaec386.smc240                    | 0.023880336  | 0.035236393 | 0.499093503 |
| pcaec386.pcaec446                  | -0.038409498 | 0.056683315 | 0.499158208 |
| pcaac342.c102                      | 0.039148119  | 0.057798665 | 0.499345906 |
| pcaec382.pcaac323                  | -0.037369578 | 0.055173686 | 0.499352714 |
| lysopcac181.c18                    | -0.020046527 | 0.029597666 | 0.499357171 |
| smc241.pcaac240                    | -0.00620992  | 0.009169176 | 0.499382765 |
| ornithine.pcaac323                 | 0.036471363  | 0.053862381 | 0.499470793 |
| pcaac380.pcaac384                  | -0.023068824 | 0.034084423 | 0.499664971 |
| smohc161.pcaec424                  | -0.005786552 | 0.008550816 | 0.499721362 |
| isoleucine.smohc241                | 0.028899426  | 0.042717187 | 0.499845302 |
| c102.pcaec362                      | 0.013019967  | 0.019252289 | 0.500002071 |
| putrescine.pcaec443                | 0.03748274   | 0.055436072 | 0.500089394 |
| smc181.smohc222                    | -0.004139007 | 0.006122212 | 0.500139687 |
| pcaac406.lysopcac181               | 0.011223816  | 0.01660184  | 0.500143175 |
| pcaac406.phenylalanine             | 0.015622546  | 0.023111388 | 0.500200795 |
| lysopcac204.isoleucine             | -0.014793349 | 0.02188634  | 0.500232747 |
| alanine.pcaec361                   | 0.005132396  | 0.007594725 | 0.500316776 |
| pcaec300.c51                       | -0.044673133 | 0.066106271 | 0.50032102  |
| alphaaminoadipicacid.pcaac363      | -0.013704574 | 0.020281638 | 0.500361646 |
| prolinr.c18                        | 0.035465659  | 0.052487979 | 0.50037576  |
| pcaec422.pcaac385                  | -0.020041449 | 0.029669677 | 0.50050565  |
| lysopcac204.pcaec382               | -0.005193935 | 0.007691253 | 0.500620803 |
| glycine.pcaac424                   | -0.004123299 | 0.00610588  | 0.50062354  |
| pcaec383.pcaec301                  | 0.045894849  | 0.067967617 | 0.500657684 |
| asymmetricdimethylarginine.taurine | -0.022627713 | 0.033513646 | 0.500699946 |
| citruiline.lysopcac170             | -0.009485366 | 0.014048813 | 0.500704378 |
| asparticacid.lysopcac181           | -0.049917621 | 0.073946361 | 0.500780576 |
| lysopcac160.pcaec401               | -0.047817492 | 0.070836388 | 0.500787156 |
| pcaac405.glutamine                 | -0.004089835 | 0.006059467 | 0.500845334 |
| methioninesulfoxide.pcaac240       | -0.013964742 | 0.020692137 | 0.500888352 |
| pcaac360.pcaec383                  | 0.053179538  | 0.078818422 | 0.500997369 |
| c5.c8                              | -0.052891509 | 0.078406871 | 0.501081007 |
| putrescine.isoleucine              | 0.008465031  | 0.012548742 | 0.501084433 |
| lysopcac160.pcaec343               | 0.044503475  | 0.065976568 | 0.5011082   |
| pcaec421.h1                        | 0.001999932  | 0.002964983 | 0.501119229 |
| prolinr.c142                       | 0.046046316  | 0.068289693 | 0.501270036 |
| smohc221.pcaec340                  | 0.017646735  | 0.026172231 | 0.501285871 |
| pcaec403.pcaec301                  | 0.035902665  | 0.053253396 | 0.5013294   |
| pcaec363.glutamicacid              | 0.018872075  | 0.028001119 | 0.501462317 |
| pcaec421.pcaec385                  | -0.048857657 | 0.072494856 | 0.501480828 |

|                                   |              |             |             |
|-----------------------------------|--------------|-------------|-------------|
| lysine.pcaec425                   | 0.003810917  | 0.005654736 | 0.501488939 |
| ornithine.pcaec385                | -0.029033648 | 0.043085016 | 0.501530097 |
| methionine.c51                    | -0.03928744  | 0.058302681 | 0.50154007  |
| pcaac300.pcaec445                 | 0.030999259  | 0.046004633 | 0.501555274 |
| pcaec404.prolinr                  | -0.009630566 | 0.014295125 | 0.501639765 |
| pcaac404.smohc161                 | 0.008162624  | 0.01211884  | 0.501733231 |
| arginine.glycine                  | 0.019713936  | 0.029271442 | 0.501772123 |
| c18.pcaac362                      | -0.019067877 | 0.02831653  | 0.501837911 |
| c0.pcaec446                       | -0.047146424 | 0.070025272 | 0.50190511  |
| pcaec363.pcaec446                 | -0.018047282 | 0.026805241 | 0.501906951 |
| lysopcac281.asymmetricdimethylarg | -0.009644845 | 0.014328039 | 0.501989119 |
| pcaac401.pcaec420                 | 0.024015433  | 0.035676998 | 0.501995383 |
| pcaac425.phenylalanine            | 0.020773147  | 0.030862267 | 0.502022571 |
| smc161.smohc141                   | 0.031029988  | 0.046100893 | 0.502024711 |
| arginine.pcaac381                 | 0.016535937  | 0.024574021 | 0.50214234  |
| pcaac360.pcaac383                 | 0.003617281  | 0.005375684 | 0.502146336 |
| pcaec365.pcaec383                 | 0.034797514  | 0.05171724  | 0.502181373 |
| pcaec445.pcaac366                 | -0.007308001 | 0.01086196  | 0.502203429 |
| c0.pcaec385                       | -0.025115393 | 0.037334973 | 0.502268574 |
| smc160.pcaac344                   | -0.030542301 | 0.045402292 | 0.502268736 |
| pcaec301.pcaac343                 | -0.013372755 | 0.019879623 | 0.502279752 |
| c142.serotonin                    | 0.025405584  | 0.037775444 | 0.502371266 |
| pcaec363.serine                   | -0.009692701 | 0.014412454 | 0.502383776 |
| c142.c101                         | -0.011360547 | 0.016893235 | 0.502403872 |
| pcaec381.pcaec422                 | -0.046247631 | 0.068777008 | 0.502443368 |
| pcaac362.pcaec341                 | 0.035597892  | 0.052946735 | 0.502503404 |
| smohc241.lysopcac281              | -0.00960644  | 0.014289809 | 0.50255158  |
| prolinr.pcaac422                  | -0.005142267 | 0.007650686 | 0.50263193  |
| serine.pcaac420                   | 0.031360576  | 0.046662385 | 0.502668412 |
| pcaac341.prolinr                  | 0.032212084  | 0.047935491 | 0.502722871 |
| pcaac386.pcaac384                 | -0.026433099 | 0.039341214 | 0.50278309  |
| pcaac405.pcaac403                 | -0.003432558 | 0.0051088   | 0.502784312 |
| pcaac386.isoleucine               | 0.013276831  | 0.019763735 | 0.502856638 |
| pcaec445.pcaac424                 | -0.008430853 | 0.012550793 | 0.502881238 |
| pcaec406.lysopcac181              | 0.019407377  | 0.028891822 | 0.502889536 |
| asparagine.smc161                 | -0.050612283 | 0.075349686 | 0.502906649 |
| smohc241.pcaec363                 | -0.012733536 | 0.018972533 | 0.503250949 |
| lysopcac181.pcaec322              | -0.037390256 | 0.055713142 | 0.503273448 |
| c12.c162                          | -0.07139366  | 0.10641671  | 0.503421575 |
| c8.smc180                         | -0.009188586 | 0.013697517 | 0.503463742 |
| smc260.pcaac422                   | -0.007846079 | 0.011696951 | 0.503490059 |
| methionine.pcaec420               | -0.021827341 | 0.032541048 | 0.503500577 |
| pcaec424.pcaac422                 | -0.010691057 | 0.015939226 | 0.503516141 |
| smohc141.spermidine               | 0.034660352  | 0.051677194 | 0.503535153 |
| asparticacid.c4                   | -0.024227709 | 0.036125618 | 0.503571438 |

|                                   |              |             |             |
|-----------------------------------|--------------|-------------|-------------|
| pcaec423.acetylmethionine         | -0.015968172 | 0.023809947 | 0.503571721 |
| ornithine.pcaac426                | 0.03619361   | 0.05397835  | 0.503654575 |
| pcaac402.pcaac384                 | 0.020537017  | 0.030631043 | 0.503690596 |
| smc260.isoleucine                 | 0.006446316  | 0.009614812 | 0.503695277 |
| pcaec385.lysopcac181              | 0.024531718  | 0.036593523 | 0.50374143  |
| lysopcac281.pcaac422              | -0.007517143 | 0.011213365 | 0.503748213 |
| c14.c0                            | 0.000519382  | 0.000774978 | 0.503865313 |
| pcaac403.c162                     | 0.046081914  | 0.068774918 | 0.503960413 |
| pcaec423.pcaec301                 | 0.041947431  | 0.062611641 | 0.504009579 |
| lysopcac170.lysopcac281           | -0.010879757 | 0.016241528 | 0.504066405 |
| pcaac341.pcaec384                 | -0.02050732  | 0.030614786 | 0.504080741 |
| asparagine.pcaec425               | 0.004351139  | 0.006497646 | 0.504208956 |
| pcaac343.pcaac422                 | -0.013010883 | 0.01943065  | 0.504235857 |
| pcaec364.pcaac344                 | 0.032102815  | 0.047949458 | 0.504294689 |
| asparticacid.acetylmethionine     | -0.031908232 | 0.047682782 | 0.504508553 |
| smc180.pcaec364                   | 0.021438842  | 0.032038283 | 0.504517429 |
| glutamicacid.pcaec363             | -0.028469999 | 0.042548722 | 0.504547956 |
| c181.smc180                       | -0.008542977 | 0.012769195 | 0.504602024 |
| pcaac402.pcaac381                 | 0.03305162   | 0.049411694 | 0.504683082 |
| c4.smc160                         | 0.039067191  | 0.058411845 | 0.504733761 |
| pcaec380.pcaac361                 | -0.022110335 | 0.033067054 | 0.504842912 |
| lysopcac280.c16                   | 0.009070254  | 0.01356733  | 0.504916126 |
| pcaec361.kynurenine               | -0.004014356 | 0.00600491  | 0.504931478 |
| pcaec406.pcaec363                 | 0.022843513  | 0.034175139 | 0.504987055 |
| c8.serine                         | 0.009310086  | 0.013928733 | 0.504997332 |
| asymmetricdimethylarginine.smc260 | 0.012802012  | 0.019154163 | 0.505023848 |
| smohc161.c5                       | -0.002277106 | 0.003407431 | 0.505081427 |
| c101.acetylmethionine             | 0.038605643  | 0.057777213 | 0.505142149 |
| c3.smc240                         | -0.021714166 | 0.032498977 | 0.505162445 |
| pcaec300.alanine                  | -0.008936974 | 0.013378745 | 0.505258698 |
| pcaec401.pcaac384                 | -0.032587463 | 0.048789345 | 0.505307221 |
| lysopcac204.pcaac366              | 0.011666132  | 0.017466877 | 0.50532087  |
| pcaec301.pcaec446                 | -0.035502919 | 0.053157812 | 0.505335209 |
| pcaec404.pcaec361                 | 0.004235223  | 0.006341678 | 0.505359522 |
| lysopcac170.smc161                | 0.03234543   | 0.048435291 | 0.505380175 |
| pcaec321.pcaec446                 | -0.039307138 | 0.058861093 | 0.505387928 |
| pcaec423.pcaac240                 | -0.006696758 | 0.010028809 | 0.505415176 |
| lysopcac204.pcaac321              | -0.015950751 | 0.023893289 | 0.505522845 |
| pcaec402.c101                     | 0.019991414  | 0.029946254 | 0.505526964 |
| pcaac360.methioninesulfoxide      | 0.009380497  | 0.014051732 | 0.505531907 |
| pcaec300.lysopcac280              | 0.005026218  | 0.007529928 | 0.505576381 |
| pcaac405.c182                     | 0.015263489  | 0.022866796 | 0.505578343 |
| pcaac281.pcaec383                 | -0.027325586 | 0.040949335 | 0.505701488 |
| pcaac364.pcaec406                 | 0.008119712  | 0.012168988 | 0.505737143 |
| c5.c2                             | -0.069525706 | 0.104216569 | 0.505812984 |

|                                    |              |             |             |
|------------------------------------|--------------|-------------|-------------|
| lysopcac181.histidine              | 0.029702432  | 0.044525096 | 0.505834014 |
| methioninesulfoxide.tyrosine       | -0.035016986 | 0.052495895 | 0.505866993 |
| asparagine.pcaec340                | 0.034175254  | 0.051235197 | 0.505876849 |
| acetylmethionine.pcaec403          | -0.002036167 | 0.003052953 | 0.505925813 |
| c3.smc261                          | -0.026649492 | 0.039958244 | 0.505936304 |
| pcaac343.lysopcac203               | 0.016061597  | 0.024085091 | 0.505977507 |
| c142.creatinine                    | -0.011856919 | 0.017782653 | 0.506041167 |
| pcaec381.c51                       | -0.049836234 | 0.074765261 | 0.506168226 |
| c5.lysopcac161                     | -0.089353704 | 0.134050373 | 0.506169033 |
| lysopcac182.glutamine              | -0.009876919 | 0.014820792 | 0.506261397 |
| smc261.pcaec424                    | -0.003982453 | 0.005976189 | 0.506284651 |
| c102.smc161                        | 0.059433751  | 0.089209462 | 0.506386342 |
| asymmetricdimethylarginine.pcaec42 | 0.00741981   | 0.011140304 | 0.50650995  |
| c18.c3                             | -0.023750746 | 0.035665357 | 0.506573518 |
| pcaac363.smc160                    | -0.040906192 | 0.061429327 | 0.506590511 |
| pcaac300.smc202                    | -0.016042024 | 0.024092551 | 0.506626588 |
| pcaac386.pcaec384                  | 0.024324676  | 0.036534037 | 0.506652957 |
| c51.pcaec384                       | -0.017318166 | 0.026013156 | 0.506692554 |
| c10.pcaec380                       | -0.035379387 | 0.053149283 | 0.506747229 |
| leucine.pcaec361                   | 0.003889128  | 0.00584252  | 0.506748128 |
| phenylalanine.smc240               | -0.027910756 | 0.041941246 | 0.50686701  |
| c51dc.pcaec343                     | -0.013409551 | 0.020152029 | 0.506900995 |
| smc240.prolinr                     | -0.016657468 | 0.025039879 | 0.507016939 |
| pcaac404.pcaec422                  | 0.006193335  | 0.009310477 | 0.507040487 |
| pcaac300.c12                       | 0.026466088  | 0.039794112 | 0.507120275 |
| lysopcac181.pcaec403               | 0.020447508  | 0.030749974 | 0.507193807 |
| ornithine.pcaec320                 | -0.02690274  | 0.040458432 | 0.507201778 |
| pcaac401.pcaec361                  | -0.038934976 | 0.058557779 | 0.50723316  |
| c102.pcaec405                      | 0.043957187  | 0.066123033 | 0.507309489 |
| c51.tyrosine                       | -0.023170259 | 0.034854649 | 0.507316272 |
| smc240.smc180                      | -0.005175072 | 0.00778504  | 0.507330553 |
| putrescine.smc261                  | 0.013038463  | 0.019615008 | 0.507347754 |
| c5.h1                              | -0.00244687  | 0.003681692 | 0.507420531 |
| acetylmethionine.pcaec320          | -0.042416662 | 0.063822532 | 0.507421416 |
| pcaec443.pcaec322                  | 0.031711806  | 0.047724457 | 0.507501916 |
| c51.smc160                         | -0.041876182 | 0.063025633 | 0.507531307 |
| c4.pcaec240                        | -0.012405541 | 0.018676765 | 0.507663838 |
| pcaac405.pcaec321                  | -0.021134775 | 0.031819328 | 0.507671071 |
| lysine.pcaec365                    | -0.024468427 | 0.036841088 | 0.507703294 |
| asparagine.pcaec364                | -0.018997685 | 0.028605962 | 0.507732064 |
| alphaaminoadipicacid.c12           | -0.023520437 | 0.035423196 | 0.507816428 |
| pcaac360.pcaec362                  | -0.005862487 | 0.008829894 | 0.507846885 |
| pcaac344.pcaec380                  | -0.032569295 | 0.049055178 | 0.507849733 |
| pcaac281.asparagine                | 0.003409314  | 0.005136858 | 0.507999942 |
| lysopcac160.c8                     | 0.033093451  | 0.049868277 | 0.508050473 |

|                                    |              |             |             |
|------------------------------------|--------------|-------------|-------------|
| methionine.glutamicacid            | 0.020487852  | 0.030879958 | 0.508146    |
| pcaec322.pcaec364                  | 0.032396062  | 0.048828523 | 0.508147076 |
| pcaec340.pcaec362                  | -0.010334083 | 0.015577139 | 0.508180599 |
| c12.serotonin                      | 0.016154455  | 0.024352403 | 0.508213527 |
| pcaec300.pcaec422                  | -0.006990655 | 0.0105385   | 0.508224646 |
| pcaec422.glutamine                 | -0.00455374  | 0.006865245 | 0.508250876 |
| pcaec406.pcaec281                  | 0.00095678   | 0.001442821 | 0.508360866 |
| c8.arginine                        | -0.006293753 | 0.009492994 | 0.508451352 |
| pcaec402.pcaec403                  | -0.021749461 | 0.032807887 | 0.508486712 |
| asymmetricdimethylarginine.pcaec40 | -0.00197223  | 0.002975553 | 0.508564936 |
| c51.smc161                         | -0.054502033 | 0.082264956 | 0.508752183 |
| pcaec366.pcaec300                  | -0.031636235 | 0.047753998 | 0.508774371 |
| pcaec424.pcaec362                  | -0.003188227 | 0.004813628 | 0.508870097 |
| pcaec323.pcaec446                  | -0.015744106 | 0.02377092  | 0.508874772 |
| pcaec281.arginine                  | -0.029671932 | 0.044808865 | 0.508962566 |
| pcaec422.pcaec404                  | 0.005680606  | 0.00857887  | 0.508979437 |
| smc160.serotonin                   | 0.048858291  | 0.073789968 | 0.509002428 |
| c101.pcaec446                      | -0.018426033 | 0.027829873 | 0.509022232 |
| c51.pcaec365                       | -0.014200912 | 0.021449814 | 0.509049398 |
| pcaec381.pcaec422                  | -0.036311771 | 0.054855088 | 0.509109989 |
| pcaec342.pcaec446                  | -0.027981092 | 0.042270227 | 0.509110412 |
| pcaec386.smohc241                  | -0.054346243 | 0.082103254 | 0.509130789 |
| smc261.c14                         | 0.021784688  | 0.032914594 | 0.509175882 |
| c141oh.pcaec405                    | -0.032320592 | 0.04883769  | 0.509213525 |
| pcaec300.pcaec385                  | -0.029915644 | 0.045204606 | 0.509221829 |
| c3.lysopcac204                     | 0.027769008  | 0.041961268 | 0.509225636 |
| pcaec366.ornithine                 | -0.021096217 | 0.031878379 | 0.509228953 |
| c142.smc180                        | -0.013114156 | 0.019818478 | 0.509266251 |
| pcaec322.c3                        | -0.020627441 | 0.031174827 | 0.50929422  |
| pcaec402.pcaec322                  | 0.045053152  | 0.06810021  | 0.509357103 |
| pcaec384.pcaec444                  | -0.04306437  | 0.065097388 | 0.509378701 |
| pcaec405.pcaec425                  | 0.007029959  | 0.010627579 | 0.509413827 |
| pcaec381.c141                      | -0.020531136 | 0.031038074 | 0.509414064 |
| c10.isoleucine                     | -0.008818931 | 0.013332495 | 0.509427369 |
| pcaec406.asparagine                | -0.006539456 | 0.009886492 | 0.50943237  |
| isoleucine.c141                    | -0.020252314 | 0.03062009  | 0.509462747 |
| c4.isoleucine                      | 0.00724524   | 0.010955033 | 0.509491074 |
| pcaec381.tyrosine                  | -0.024646876 | 0.037272652 | 0.509556789 |
| c14.taurine                        | -0.017617961 | 0.026645819 | 0.509600594 |
| pcaec421.pcaec446                  | 0.044765918  | 0.067713844 | 0.509655626 |
| pcaec341.pcaec321                  | -0.029775386 | 0.045041565 | 0.509681024 |
| serotonin.creatinine               | -0.004428151 | 0.006698957 | 0.509708932 |
| lysopcac182.c142                   | 0.055778585  | 0.084398278 | 0.509788088 |
| prolinr.transhydroxyproline        | 0.02132595   | 0.032270027 | 0.509812272 |
| c10.c2                             | 0.027463078  | 0.041563271 | 0.509879942 |

|                                     |              |             |             |
|-------------------------------------|--------------|-------------|-------------|
| pcaec340.c2                         | 0.033961956  | 0.051402134 | 0.509907131 |
| pcaec361.pcaac422                   | -0.01545102  | 0.023385637 | 0.50991064  |
| pcaec386.glycine                    | 0.026719666  | 0.040441193 | 0.50991149  |
| smohc141.c5                         | -0.002165041 | 0.00327695  | 0.509922047 |
| pcaac360.pcaec404                   | -0.008472034 | 0.012825704 | 0.510009359 |
| pcaec386.pcaac403                   | -0.002416348 | 0.003658125 | 0.510014688 |
| lysopcac140.pcaac420                | 0.039376646  | 0.059623112 | 0.510089482 |
| pcaec322.smc161                     | -0.053725564 | 0.081351444 | 0.510097622 |
| pcaac384.glutamine                  | -0.005104158 | 0.007730602 | 0.510199639 |
| methionine.creatinine               | -0.003102974 | 0.004699743 | 0.510206282 |
| pcaac361.pcaac366                   | -0.007124077 | 0.01079146  | 0.510260333 |
| alanine.c8                          | -0.020246207 | 0.030672479 | 0.510312464 |
| pcaec401.c182                       | 0.014279281  | 0.021635536 | 0.510367017 |
| pcaec363.pcaac403                   | -0.002097973 | 0.003178957 | 0.510389724 |
| pcaac322.pcaac366                   | -0.029562931 | 0.044802175 | 0.51045479  |
| c181.smc240                         | -0.013951485 | 0.021146986 | 0.510529084 |
| lysopcac160.c142                    | 0.017916702  | 0.027157476 | 0.510532293 |
| c3.pcaac404                         | 0.004051152  | 0.006142319 | 0.510651416 |
| c4.smc261                           | 0.016940953  | 0.025686236 | 0.5106599   |
| smc181.pcaec405                     | -0.015243697 | 0.02311588  | 0.510715772 |
| pcaac403.lysopcac182                | -0.046814467 | 0.070994952 | 0.51074227  |
| kynurenine.c12                      | -0.018642187 | 0.028273595 | 0.51077801  |
| smohc221.pcaec380                   | 0.023029211  | 0.034929705 | 0.510808801 |
| c182.c142                           | 0.030530722  | 0.046313113 | 0.510858406 |
| methioninesulfoxide.c51             | -0.057754358 | 0.087610088 | 0.510860784 |
| lysopcac160.smc260                  | -0.02008689  | 0.030471157 | 0.510867476 |
| serine.lysopcac203                  | 0.005426486  | 0.008232913 | 0.5109244   |
| smohc241.lysine                     | 0.02500694   | 0.037941198 | 0.510939608 |
| pcaac381.pcaac385                   | -0.006897336 | 0.010464963 | 0.510945277 |
| pcaec423.pcaac360                   | -0.022298093 | 0.033832078 | 0.510949778 |
| pcaac404.alanine                    | 0.013129269  | 0.019924785 | 0.511039298 |
| smc261.glycine                      | -0.011435019 | 0.017360835 | 0.511214711 |
| h1.pcaac321                         | -0.018680523 | 0.028377277 | 0.511455503 |
| asparagine.putrescine               | 0.020204986  | 0.030701538 | 0.511571876 |
| pcaac404.pcaec382                   | 0.003211897  | 0.00488055  | 0.511577267 |
| pcaac341.c8                         | 0.022462484  | 0.034133221 | 0.511589278 |
| lysopcac140.pcaac322                | -0.023829576 | 0.036212126 | 0.511606952 |
| c141oh.pcaec421                     | -0.001974991 | 0.00300175  | 0.511676551 |
| smc160.pcaac240                     | -0.005473382 | 0.008319803 | 0.511722962 |
| pcaac406.threonine                  | 0.017104228  | 0.026000531 | 0.511743818 |
| pcaec360.asparagine                 | 0.006560872  | 0.009973336 | 0.511743985 |
| pcaec341.creatinine                 | 0.002205141  | 0.003352845 | 0.511839355 |
| glycine.lysopcac204                 | -0.008991866 | 0.013673026 | 0.511875839 |
| asymmetricdimethylarginine.pcaac366 | 0.005779045  | 0.008788368 | 0.51191214  |
| pcaac323.pcaac240                   | -0.006612576 | 0.010056971 | 0.511955128 |

|                            |              |             |             |
|----------------------------|--------------|-------------|-------------|
| pcaec384.lysopcac140       | -0.00061927  | 0.000941905 | 0.511984527 |
| pcaec363.pcaac322          | 0.034215397  | 0.052058341 | 0.512122211 |
| pcaac323.threonine         | -0.021390399 | 0.032552301 | 0.512213442 |
| pcaac300.pcaec422          | 0.013014326  | 0.019807991 | 0.512267683 |
| pcaac366.lysopcac170       | -0.005068336 | 0.007715512 | 0.512345913 |
| c8.c4                      | 0.003401436  | 0.00517818  | 0.512360869 |
| pcaac341.pcaac366          | -0.004750129 | 0.00723331  | 0.512474133 |
| lysopcac181.c102           | 0.026874523  | 0.040924764 | 0.512487482 |
| pcaac421.asparagine        | -0.005648442 | 0.008601972 | 0.512510694 |
| c162.pcaec446              | -0.017327176 | 0.026387948 | 0.512518894 |
| methioninesulfoxide.smc240 | -0.026475191 | 0.040321716 | 0.512540306 |
| lysopcac182.pcaac403       | -0.001494456 | 0.002276093 | 0.512546892 |
| c141.lysine                | 0.024839423  | 0.037831747 | 0.512554834 |
| pcaec402.pcaec401          | -0.024860176 | 0.037865482 | 0.512578486 |
| pcaec385.h1                | -0.00130403  | 0.001986261 | 0.512587589 |
| pcaec363.smc181            | 0.010269723  | 0.015642726 | 0.512592457 |
| pcaac420.pcaac366          | -0.012857917 | 0.019586343 | 0.512620605 |
| pcaec444.pcaac362          | -0.002539998 | 0.003869925 | 0.512704363 |
| pcaec425.pcaec342          | -0.055356995 | 0.08434688  | 0.512730875 |
| lysopcac280.isoleucine     | -0.011652668 | 0.017755703 | 0.512746368 |
| pcaac381.glutamicacid      | -0.029196949 | 0.044491135 | 0.512769167 |
| pcaac366.smc160            | -0.022679749 | 0.03456317  | 0.512807267 |
| serotonin.pcaac240         | 0.011277368  | 0.017192919 | 0.512968615 |
| pcaac362.pcaac420          | 0.037526274  | 0.05721278  | 0.512983878 |
| pcaec445.glutamicacid      | 0.037452285  | 0.057111372 | 0.513067837 |
| pcaec361.pcaac362          | -0.010945484 | 0.01669218  | 0.513100595 |
| pcaac322.pcaec362          | 0.014690443  | 0.022404717 | 0.51312625  |
| phenylalanine.pcaec422     | -0.02213975  | 0.033769034 | 0.513166304 |
| pcaac425.c0                | -0.000537996 | 0.000820637 | 0.513191466 |
| methioninesulfoxide.c5     | 0.012742949  | 0.019439012 | 0.513222779 |
| pcaac401.pcaec402          | -0.085049634 | 0.129764266 | 0.51329874  |
| alanine.lysopcac281        | -0.013659939 | 0.020841767 | 0.513301762 |
| pcaec322.smohc241          | -0.03398298  | 0.051855794 | 0.513350231 |
| pcaec380.smc160            | -0.01756233  | 0.02680136  | 0.513387867 |
| pcaec404.c162              | 0.049517709  | 0.075578562 | 0.513449233 |
| pcaec382.pcaac425          | -0.078018616 | 0.119079544 | 0.513450045 |
| pcaec420.lysopcac140       | 0.000446246  | 0.000681139 | 0.513471622 |
| pcaac320.creatinine        | 0.004131341  | 0.006306062 | 0.513477458 |
| smohc221.pcaec301          | 0.032152155  | 0.049084899 | 0.513545786 |
| smc202.smc160              | -0.041281849 | 0.063023577 | 0.513551695 |
| smohc161.pcaec402          | -0.027512392 | 0.042004668 | 0.513576177 |
| pcaec322.lysopcac204       | -0.01896998  | 0.028963593 | 0.513592021 |
| pcaac343.pcaac366          | -0.006940049 | 0.010599266 | 0.513715655 |
| pcaec342.histidine         | 0.035451652  | 0.054149012 | 0.513755108 |
| pcaac300.pcaec380          | -0.028199944 | 0.043076392 | 0.513790927 |

|                                   |              |             |             |
|-----------------------------------|--------------|-------------|-------------|
| pcaec342.c51                      | -0.031767766 | 0.048530403 | 0.513825919 |
| pcaac240.prolinr                  | -0.015641385 | 0.023897429 | 0.513873092 |
| c182.smc160                       | 0.034619377  | 0.05289489  | 0.513890994 |
| lysopcac180.pcaac344              | -0.027056196 | 0.041340252 | 0.513902512 |
| c12.c51dc                         | 0.070291337  | 0.107440231 | 0.514056109 |
| lysopcac182.pcaec383              | -0.031338286 | 0.047914146 | 0.51417547  |
| pcaac424.smc260                   | -0.022918137 | 0.035044226 | 0.514222528 |
| smc241.smohc241                   | -0.039967324 | 0.061126719 | 0.514308462 |
| pcaec385.c4                       | 0.024191974  | 0.036999815 | 0.514310625 |
| pcaec444.valine                   | 0.031402105  | 0.048032001 | 0.514352849 |
| pcaec343.pcaac420                 | 0.041901421  | 0.064094024 | 0.514369162 |
| lysopcac204.smohc141              | 0.021151239  | 0.032354483 | 0.514378709 |
| pcaec445.pcaac422                 | -0.005155576 | 0.007887147 | 0.514421316 |
| c2.c5                             | -0.003159275 | 0.004833306 | 0.514434932 |
| leucine.pcaec420                  | -0.034248228 | 0.052399403 | 0.514465315 |
| smc180.pcaac420                   | 0.03177088   | 0.048623476 | 0.514589581 |
| pcaac344.alphaaminoadipicacid     | 0.002823155  | 0.004320809 | 0.514602835 |
| pcaac401.c0                       | -0.00066922  | 0.001024269 | 0.514616648 |
| pcaec403.phenylalanine            | -0.035010477 | 0.05359563  | 0.514700355 |
| pcaec420.threonine                | 0.007231312  | 0.01107061  | 0.514722664 |
| leucine.lysopcac204               | -0.01248445  | 0.019116766 | 0.514810194 |
| pcaec365.lysopcac170              | 0.006392175  | 0.009788561 | 0.514834561 |
| pcaec300.pcaec403                 | -0.012664735 | 0.019401111 | 0.514989453 |
| c142.taurine                      | -0.019515573 | 0.029898042 | 0.515019343 |
| pcaac366.lysopcac182              | -0.008819438 | 0.013511503 | 0.515020643 |
| pcaec446.pcaac403                 | -0.001940212 | 0.002972481 | 0.515027556 |
| pcaec402.pcaac426                 | 0.044977273  | 0.068920308 | 0.515108851 |
| pcaac321.phenylalanine            | -0.026459651 | 0.040549273 | 0.515152202 |
| pcaac401.pcaec383                 | -0.079508308 | 0.121869556 | 0.515233103 |
| glutamicacid.tyrosine             | -0.037030738 | 0.056764847 | 0.515266316 |
| pcaec301.smc241                   | 0.017135752  | 0.026268936 | 0.515287771 |
| pcaec424.spermidine               | -0.033420625 | 0.051237667 | 0.515322023 |
| lysopcac182.asparagine            | -0.003925633 | 0.006018709 | 0.51534022  |
| c12.pcaac321                      | 0.01009506   | 0.015479258 | 0.515386184 |
| pcaec342.lysine                   | -0.032206634 | 0.04939057  | 0.515441689 |
| pcaac402.pcaac385                 | -0.014025406 | 0.021514809 | 0.515560767 |
| smohc241.lysopcac203              | -0.006100114 | 0.009357911 | 0.515579049 |
| methionine.smohc141               | -0.025457615 | 0.03905369  | 0.515582321 |
| kynurenine.pcaec422               | 0.01547384   | 0.023738664 | 0.515595658 |
| c16.serine                        | 0.014529913  | 0.022290972 | 0.515603216 |
| smc260.asymmetricdimethylarginine | 0.011667319  | 0.017901556 | 0.515655066 |
| c142.smc260                       | 0.012613913  | 0.019354476 | 0.51566652  |
| pcaac360.pcaac405                 | -0.029189418 | 0.044792368 | 0.515711896 |
| alphaaminoadipicacid.pcaec341     | 0.015906778  | 0.024411937 | 0.515751885 |
| pcaec321.tyrosine                 | -0.022990539 | 0.035286517 | 0.515790137 |



|                          |              |             |             |
|--------------------------|--------------|-------------|-------------|
| c142.pcaac240            | -0.006434264 | 0.009876969 | 0.515853021 |
| pcaec420.pcaac322        | 0.027770965  | 0.04263365  | 0.515888477 |
| pcaec363.serotonin       | 0.052009004  | 0.07986478  | 0.515999655 |
| pcaec342.pcaec401        | 0.042364803  | 0.065061954 | 0.516043221 |
| pcaec422.c18             | -0.022526511 | 0.034598527 | 0.516083518 |
| glutamine.serine         | -0.006024757 | 0.009254522 | 0.516132514 |
| pcaac361.pcaec384        | -0.032716616 | 0.050259261 | 0.516164592 |
| pcaac401.lysine          | 0.04880343   | 0.074973462 | 0.516173756 |
| pcaac366.smc181          | 0.005881694  | 0.009036247 | 0.516201228 |
| pcaac420.pcaec403        | -0.012310172 | 0.018917049 | 0.516301132 |
| glutamine.isoleucine     | 0.010696147  | 0.016437185 | 0.516311549 |
| asparagine.pcaac420      | 0.041718219  | 0.064117271 | 0.516358995 |
| lysopcac204.glutamicacid | -0.023085789 | 0.035482356 | 0.516376787 |
| pcaec384.pcaec343        | 0.03711002   | 0.057046226 | 0.516442365 |
| pcaec362.pcaec380        | 0.018153571  | 0.027906842 | 0.516454818 |
| pcaac322.smohc222        | -0.002773285 | 0.004263471 | 0.516474286 |
| glycine.pcaac380         | -0.02868017  | 0.044098533 | 0.516545251 |
| smc260.pcaec446          | -0.010975682 | 0.016876951 | 0.516564567 |
| arginine.pcaec425        | 0.003701161  | 0.005692314 | 0.516649745 |
| pcaec422.pcaac403        | -0.006511932 | 0.010015756 | 0.516671949 |
| pcaac383.pcaac361        | -0.03732637  | 0.057422567 | 0.516761587 |
| c8.smc261                | 0.022916403  | 0.035259187 | 0.516818449 |
| smc161.pcaac425          | 0.046098256  | 0.070936436 | 0.516875334 |
| c5.pcaac343              | 0.018045036  | 0.027768843 | 0.516889945 |
| pcaac421.pcaec401        | -0.016384111 | 0.025213106 | 0.516893259 |
| pcaec386.pcaec403        | -0.011705168 | 0.018014657 | 0.516936534 |
| pcaac362.pcaec446        | -0.021093761 | 0.032469376 | 0.517005493 |
| pcaac386.smc161          | 0.040037808  | 0.061631816 | 0.517019684 |
| c2.pcaec446              | -0.034137257 | 0.052558116 | 0.517093394 |
| pcaac342.lysopcac170     | -0.004630006 | 0.007128824 | 0.517117696 |
| c181.serotonin           | 0.047246263  | 0.072750301 | 0.5171475   |
| pcaac281.serine          | -0.006283011 | 0.009674823 | 0.517155097 |
| smc160.lysopcac170       | 0.005899462  | 0.009085899 | 0.51723246  |
| pcaec401.c51             | -0.067322965 | 0.103689011 | 0.517245919 |
| lysopcac203.pcaac364     | 0.023884123  | 0.03679213  | 0.517319243 |
| smc261.pcaac422          | -0.014315835 | 0.022054844 | 0.517359378 |
| smc261.smohc141          | 0.04075157   | 0.062794706 | 0.517447377 |
| glutamine.pcaac405       | -0.036857634 | 0.056800899 | 0.517494638 |
| pcaec343.smc260          | -0.018864474 | 0.029075719 | 0.517550477 |
| lysopcac170.arginine     | -0.029376082 | 0.045277279 | 0.517551144 |
| pcaec365.pcaac403        | -0.001597058 | 0.002461626 | 0.5175655   |
| pcaac421.pcaec386        | -0.008177275 | 0.012605572 | 0.517616143 |
| pcaac384.c14             | 0.013467639  | 0.0207628   | 0.517655129 |
| smc240.pcaac366          | -0.010150805 | 0.015649347 | 0.517656343 |
| lysopcac160.pcaec405     | -0.019478412 | 0.030029807 | 0.517659504 |

|                               |              |             |             |
|-------------------------------|--------------|-------------|-------------|
| smc241.pcaac343               | 0.012126645  | 0.018701739 | 0.517796521 |
| pcaec443.pcaac385             | -0.009410773 | 0.014514759 | 0.517838101 |
| pcaac406.histidine            | 0.024305445  | 0.037492929 | 0.517897042 |
| lysopcac280.smc241            | 0.027509462  | 0.042435556 | 0.517898975 |
| pcaac404.c3                   | -0.034593854 | 0.053364147 | 0.517901685 |
| serotonin.pcaac384            | -0.027476733 | 0.042385785 | 0.51790603  |
| pcaec342.c102                 | 0.014486884  | 0.022353948 | 0.518025462 |
| c51dc.valine                  | -0.021322026 | 0.032901029 | 0.518027152 |
| pcaac383.pcaac385             | -0.010018641 | 0.015462259 | 0.51810712  |
| pcaac322.lysopcac203          | 0.007758388  | 0.011974957 | 0.518144028 |
| pcaac381.glycine              | -0.007407946 | 0.011434134 | 0.518146933 |
| pcaac240.pcaec406             | 0.004194524  | 0.006474641 | 0.518173427 |
| pcaec364.lysopcac281          | 0.008154912  | 0.012588836 | 0.518205401 |
| pcaac365.smc181               | 0.020467509  | 0.031598807 | 0.51824332  |
| pcaec443.pcaec385             | -0.03533892  | 0.054558407 | 0.51824592  |
| pcaac344.pcaac322             | 0.05732926   | 0.08851975  | 0.518299243 |
| pcaec406.pcaec385             | -0.0457678   | 0.070675225 | 0.518340908 |
| c182.pcaec301                 | -0.026136946 | 0.040364551 | 0.518377574 |
| pcaac422.lysopcac180          | -0.03899105  | 0.060238252 | 0.518533494 |
| pcaec386.alphaaminoadipicacid | 0.002290228  | 0.003538339 | 0.518546295 |
| pcaec405.lysopcac280          | 0.010218876  | 0.015788576 | 0.518564625 |
| smc241.pcaec423               | 0.012451877  | 0.019238954 | 0.518571187 |
| pcaac321.pcaac364             | 0.041953083  | 0.06482588  | 0.518607629 |
| smc180.pcaec380               | 0.029257047  | 0.045211553 | 0.5186407   |
| lysopcac281.pcaec364          | 0.006230142  | 0.009628047 | 0.518661179 |
| pcaac281.smc240               | -0.023256126 | 0.035941759 | 0.518682061 |
| lysopcac204.kynurenine        | -0.006355083 | 0.009822815 | 0.518732778 |
| methionine.serine             | -0.013182986 | 0.020376782 | 0.518739579 |
| lysopcac160.pcaec301          | 0.022208177  | 0.034332682 | 0.518809771 |
| pcaac365.c5                   | -0.005048939 | 0.007806691 | 0.518879008 |
| c141oh.smc160                 | 0.04477309   | 0.06923991  | 0.518948747 |
| pcaec362.creatinine           | 0.002320195  | 0.003588248 | 0.518966534 |
| pcaac360.pcaec342             | -0.078157119 | 0.12087515  | 0.518976666 |
| ornithine.smc240              | -0.006512895 | 0.010073637 | 0.519018698 |
| pcaec322.c51                  | -0.03031589  | 0.046896679 | 0.519075912 |
| smohc241.c141                 | -0.021215288 | 0.032821697 | 0.519114667 |
| pcaac424.c101                 | 0.010536554  | 0.016301159 | 0.519122131 |
| pcaac323.c12                  | 0.029335408  | 0.045389699 | 0.519165641 |
| phenylalanine.pcaec406        | 0.002454983  | 0.003798784 | 0.519195335 |
| isoleucine.pcaac403           | 0.01003765   | 0.015533853 | 0.51924439  |
| c14.creatinine                | 0.004858825  | 0.007520008 | 0.519282733 |
| c182.pcaec424                 | 0.005883746  | 0.009106919 | 0.519311998 |
| serotonin.pcaac404            | -0.002321599 | 0.003593606 | 0.519336722 |
| pcaec342.lysopcac203          | -0.011977741 | 0.018542216 | 0.519378444 |
| smohc241.pcaac420             | 0.033200562  | 0.051400306 | 0.519410664 |

|                                    |              |             |             |
|------------------------------------|--------------|-------------|-------------|
| pcaec360.alphaaminoadipicacid      | 0.002836695  | 0.004392079 | 0.519446408 |
| pcaac381.tyrosine                  | -0.02518532  | 0.039002571 | 0.519531163 |
| c10.c4                             | 0.004535291  | 0.007024216 | 0.519576225 |
| pcaac385.pcaac363                  | 0.004971793  | 0.007701901 | 0.519664798 |
| smc181.asparticacid                | 0.014982577  | 0.02321301  | 0.519722388 |
| c141.isoleucine                    | -0.005862389 | 0.009083683 | 0.519763114 |
| pcaac323.creatinine                | 0.00340397   | 0.005274785 | 0.519793493 |
| pcaec385.pcaac420                  | 0.025906085  | 0.040144617 | 0.51979975  |
| arginine.pcaec420                  | -0.012167881 | 0.018858582 | 0.519865529 |
| pcaec445.lysopcac204               | -0.008549161 | 0.013250668 | 0.51988493  |
| smc240.asymmetricdimethylarginine  | 0.00912246   | 0.014139465 | 0.519891384 |
| pcaac366.pcaac404                  | -0.004536997 | 0.007032392 | 0.51990442  |
| c101.pcaac406                      | 0.014026773  | 0.021742665 | 0.519924013 |
| pcaac364.pcaac361                  | 0.020735417  | 0.032143544 | 0.519948927 |
| pcaec401.prolinr                   | -0.014771685 | 0.022902097 | 0.520010563 |
| smc160.kynurenine                  | -0.002300232 | 0.003566355 | 0.520017979 |
| pcaec444.isoleucine                | -0.007398785 | 0.011472641 | 0.520065993 |
| pcaac406.glutamine                 | -0.005140151 | 0.007971639 | 0.520131982 |
| asymmetricdimethylarginine.pcaac24 | 0.006067851  | 0.009411832 | 0.52019674  |
| phenylalanine.c12                  | -0.021101022 | 0.032733987 | 0.520250604 |
| pcaac365.pcaec420                  | 0.016241839  | 0.025201136 | 0.520336457 |
| pcaec385.lysopcac204               | -0.016028367 | 0.024872536 | 0.520380438 |
| c12.pcaac426                       | 0.026595116  | 0.041270015 | 0.520382316 |
| smc181.smc260                      | -0.017492825 | 0.027145994 | 0.520394838 |
| pcaec380.pcaac421                  | -0.065435066 | 0.101566151 | 0.520483686 |
| asparagine.h1                      | -0.002902738 | 0.00450596  | 0.520523022 |
| pcaec362.lysopcac140               | -0.000522362 | 0.000810993 | 0.520586153 |
| pcaec360.pcaec406                  | -0.033201393 | 0.051556374 | 0.520663566 |
| smc261.pcaec403                    | -0.011990827 | 0.018621508 | 0.520701569 |
| c162.creatinine                    | 0.005752853  | 0.008935019 | 0.520746153 |
| smc180.pcaec404                    | -0.012273825 | 0.019064043 | 0.520768072 |
| pcaec446.alphaaminoadipicacid      | 0.003303167  | 0.005130744 | 0.520782284 |
| c51.smc241                         | -0.010809954 | 0.016795086 | 0.520886262 |
| lysopcac180.lysopcac170            | 0.005727263  | 0.008898314 | 0.52088833  |
| pcaac320.pcaac343                  | -0.030483247 | 0.047365108 | 0.520923545 |
| pcaec424.pcaec383                  | -0.043861127 | 0.068159983 | 0.520973742 |
| leucine.kynurenine                 | -0.002785132 | 0.004328414 | 0.521005673 |
| pcaec385.pcaec380                  | 0.02730108   | 0.042429963 | 0.521015086 |
| asparagine.pcaac362                | 0.008389735  | 0.013038942 | 0.521016318 |
| pcaec363.lysopcac180               | 0.041733555  | 0.064861253 | 0.521021913 |
| smc241.lysopcac281                 | 0.008261539  | 0.012840069 | 0.521028093 |
| smc260.pcaec443                    | -0.030795825 | 0.047863427 | 0.521033404 |
| pcaec445.creatinine                | 0.004138383  | 0.006432042 | 0.521039397 |
| pcaac421.ornithine                 | -0.011973523 | 0.018610417 | 0.52105468  |
| pcaac426.serine                    | -0.018470693 | 0.028711094 | 0.52108573  |

|                                    |              |             |             |
|------------------------------------|--------------|-------------|-------------|
| pcaec341.pcaac422                  | -0.009811392 | 0.015251331 | 0.521095849 |
| pcaec444.pcaec420                  | 0.017256054  | 0.026827919 | 0.521161343 |
| c101.smc161                        | -0.031831638 | 0.049492527 | 0.521195021 |
| pcaec423.smc181                    | 0.004814787  | 0.007486153 | 0.521195949 |
| pcaec421.pcaac362                  | -0.00621052  | 0.00965804  | 0.521272007 |
| smc161.c141oh                      | 0.044628038  | 0.069411072 | 0.521329424 |
| pcaec402.lysine                    | 0.046177265  | 0.071825305 | 0.521356542 |
| pcaec423.isoleucine                | -0.012082008 | 0.018793786 | 0.521381344 |
| c16.pcaac383                       | 0.005421512  | 0.008433645 | 0.521400178 |
| c162.pcaec406                      | -0.014565827 | 0.022664836 | 0.521517565 |
| smc181.c4                          | 0.008260015  | 0.012853274 | 0.521532434 |
| pcaac405.serine                    | -0.011358072 | 0.017674367 | 0.521538462 |
| c51.pcaac342                       | -0.010258115 | 0.015969629 | 0.521718458 |
| pcaac381.taurine                   | 0.028222166  | 0.043939915 | 0.521758282 |
| c18.glycine                        | -0.010249709 | 0.015961014 | 0.52183493  |
| pcaac386.pcaec406                  | -0.011934868 | 0.018587035 | 0.521876602 |
| pcaac403.smc261                    | 0.037739814  | 0.058783063 | 0.521933991 |
| c14.c141                           | 0.024682881  | 0.038445869 | 0.521935312 |
| pcaac385.glutamicacid              | -0.023449679 | 0.036525688 | 0.521942643 |
| prolinr.lysopcac203                | 0.010069714  | 0.015685958 | 0.521973638 |
| pcaec405.histidine                 | 0.052191077  | 0.081313544 | 0.522043237 |
| serotonin.pcaac320                 | 0.059427631  | 0.092595491 | 0.522076527 |
| pcaac362.c12                       | -0.03614438  | 0.056320971 | 0.522103249 |
| pcaac321.histidine                 | 0.029691656  | 0.046266708 | 0.522107868 |
| pcaac342.acetylorlnoithoine        | 0.008705373  | 0.01356602  | 0.522137389 |
| pcaac383.c12                       | -0.027268474 | 0.042494515 | 0.522144085 |
| pcaac366.pcaec362                  | 0.00855141   | 0.013327476 | 0.522180603 |
| pcaac366.c141oh                    | 0.040245614  | 0.062728704 | 0.522216521 |
| pcaac366.lysopcac204               | -0.036968628 | 0.05762399  | 0.522237788 |
| smohc222.pcaec361                  | -0.007039092 | 0.010972649 | 0.522261554 |
| pcaec380.serine                    | 0.034578112  | 0.053909718 | 0.522329405 |
| putrescine.pcaec405                | -0.026097956 | 0.040690517 | 0.52234943  |
| pcaec444.pcaac406                  | -0.01837292  | 0.028646939 | 0.52236218  |
| pcaac362.pcaac422                  | -0.00746761  | 0.011645137 | 0.522422362 |
| lysopcac180.c181                   | -0.020359524 | 0.031752192 | 0.522463579 |
| pcaec403.pcaec402                  | -0.074110041 | 0.115589165 | 0.522496081 |
| pcaec360.pcaac344                  | -0.025868828 | 0.040349032 | 0.522511662 |
| smc241.pcaec401                    | 0.030942787  | 0.048265154 | 0.522528785 |
| pcaec301.pcaec360                  | -0.002433897 | 0.003796848 | 0.522573507 |
| c141.smohc141                      | 0.014019751  | 0.021872354 | 0.522606182 |
| pcaac424.smc240                    | 0.024321517  | 0.037946183 | 0.52262742  |
| pcaec406.alphaaminoadipicacid      | 0.002955104  | 0.004613039 | 0.522853871 |
| c141oh.pcaec403                    | 0.033762054  | 0.052715197 | 0.522942392 |
| asymmetricdimethylarginine.pcaac32 | 0.049568282  | 0.077406096 | 0.523003849 |
| c51dc.taurine                      | -0.029118353 | 0.045473319 | 0.523021573 |

|                             |              |             |             |
|-----------------------------|--------------|-------------|-------------|
| c162.pcaac420               | 0.051737629  | 0.080805472 | 0.523063997 |
| pcaec384.pcaac420           | 0.033443328  | 0.052244025 | 0.523152747 |
| pcaac320.prolinr            | 0.023810264  | 0.037199613 | 0.523197715 |
| pcaac386.pcaac420           | -0.031309879 | 0.048916648 | 0.523198752 |
| pcaec343.pcaac421           | 0.011729502  | 0.018325568 | 0.523201207 |
| pcaac402.pcaac323           | -0.063693368 | 0.099520732 | 0.523240825 |
| c0.tyrosine                 | -0.02050335  | 0.032039388 | 0.523279067 |
| pcaec401.glycine            | 0.018137364  | 0.028350341 | 0.523398188 |
| lysopcac170.creatinine      | 0.002648895  | 0.00414137  | 0.523489046 |
| lysopcac182.pcaac424        | -0.002424191 | 0.003790395 | 0.523525761 |
| pcaac420.pcaec421           | -0.000960051 | 0.001501233 | 0.523560185 |
| pcaac281.pcaac380           | -0.024458636 | 0.038246748 | 0.523568301 |
| pcaec420.pcaac384           | -0.027026158 | 0.042262668 | 0.523578159 |
| pcaec443.pcaac380           | 0.033730468  | 0.05275466  | 0.523641038 |
| c102.pcaac426               | 0.042037531  | 0.065747725 | 0.523645873 |
| smc261.lysopcac170          | 0.011525143  | 0.018031881 | 0.523790188 |
| pcaac323.c101               | -0.01018614  | 0.015937546 | 0.523806496 |
| pcaac403.pcaac321           | 0.007405685  | 0.011587783 | 0.523828726 |
| pcaac300.c51                | -0.030305217 | 0.047419446 | 0.523832527 |
| asparagine.smc260           | 0.010827082  | 0.016941463 | 0.523832905 |
| pcaac240.lysopcac204        | -0.018390976 | 0.028778284 | 0.523852615 |
| lysopcac204.pcaec361        | 0.002029591  | 0.003176269 | 0.52389906  |
| pcaec341.pcaac361           | 0.01932991   | 0.030257046 | 0.523982923 |
| pcaec301.arginine           | 0.014556771  | 0.022790072 | 0.524063038 |
| c14.pcaec422                | -0.014940615 | 0.023392584 | 0.524090783 |
| pcaec424.pcaac366           | -0.005169379 | 0.008094058 | 0.524108151 |
| prolinr.methioninesulfoxide | -0.013141656 | 0.020577316 | 0.524118357 |
| pcaac362.c51dc              | -0.05964718  | 0.093400702 | 0.524138952 |
| pcaac281.pcaec446           | -0.01519722  | 0.023804096 | 0.524260397 |
| c10.serine                  | 0.009070755  | 0.014208661 | 0.524281536 |
| c141oh.c101                 | -0.002960068 | 0.004637968 | 0.524392451 |
| pcaec423.arginine           | -0.025638211 | 0.04017937  | 0.524477696 |
| pcaac344.pcaec301           | -0.043955849 | 0.06888728  | 0.524484335 |
| pcaac424.pcaac380           | 0.036613152  | 0.057383314 | 0.524509256 |
| lysopcac281.threonine       | -0.014699174 | 0.023042013 | 0.524584554 |
| pcaec342.c12                | 0.027794451  | 0.043569919 | 0.524585667 |
| pcaac406.pcaec342           | -0.054973194 | 0.086175675 | 0.524590508 |
| pcaec423.c162               | 0.037278939  | 0.05844515  | 0.524639326 |
| smohc222.putrescine         | 0.019334641  | 0.03031468  | 0.524669781 |
| pcaec423.h1                 | 0.001650438  | 0.00258775  | 0.524675739 |
| c14.pcaec446                | -0.016316128 | 0.025584976 | 0.524718433 |
| pcaec401.smc181             | 0.004609818  | 0.007228786 | 0.524731458 |
| lysopcac181.smc241          | -0.056953359 | 0.089317569 | 0.524765741 |
| pcaec406.pcaec422           | -0.014419126 | 0.022615296 | 0.524809381 |
| pcaec401.c4                 | -0.019724972 | 0.030942208 | 0.524877568 |

|                                     |              |             |             |
|-------------------------------------|--------------|-------------|-------------|
| prolinr.lysopcac161                 | 0.040308427  | 0.063234195 | 0.524897812 |
| serine.smc161                       | 0.037611283  | 0.059006534 | 0.524922416 |
| pcaec444.pcaac422                   | -0.004999304 | 0.007843666 | 0.524948659 |
| c141oh.glutamicacid                 | -0.024956622 | 0.039163046 | 0.525025985 |
| pcaec362.pcaec360                   | -0.003552167 | 0.005575107 | 0.525091881 |
| smohc221.smc240                     | -0.028930436 | 0.04540755  | 0.525104525 |
| smohc221.pcaec384                   | 0.012215691  | 0.019173485 | 0.525113981 |
| pcaac343.valine                     | 0.022605077  | 0.035485252 | 0.525170075 |
| asymmetricdimethylarginine.histidin | -0.02242825  | 0.035208789 | 0.525183226 |
| pcaac321.pcaac366                   | -0.005066849 | 0.007954381 | 0.525195341 |
| alanine.c162                        | -0.046265344 | 0.072645904 | 0.525278122 |
| pcaac343.lysopcac182                | -0.008385927 | 0.013167724 | 0.525282216 |
| smohc161.pcaac402                   | 0.033828569  | 0.053118892 | 0.525287677 |
| pcaec384.pcaac320                   | 0.049277544  | 0.077379054 | 0.525296235 |
| pcaec385.ornithine                  | -0.015800297 | 0.024811763 | 0.525313398 |
| c12.lysopcac281                     | -0.011871576 | 0.018644877 | 0.525369369 |
| lysopcac281.serotonin               | 0.060794066  | 0.095492007 | 0.525421434 |
| glycine.phenylalanine               | -0.017963874 | 0.028218534 | 0.525448675 |
| pcaac402.pcaac363                   | -0.010840948 | 0.01702953  | 0.5254496   |
| lysopcac180.lysopcac160             | 0.013293516  | 0.020882701 | 0.525460452 |
| c3.pcaec424                         | -0.011060161 | 0.017379864 | 0.525591965 |
| pcaac300.lysopcac170                | 0.009719676  | 0.015273739 | 0.525600187 |
| smc180.alanine                      | -0.014500922 | 0.022788136 | 0.525618858 |
| lysopcac182.pcaac362                | -0.003727705 | 0.005858405 | 0.525642335 |
| c142.isoleucine                     | -0.007624678 | 0.011984734 | 0.525708059 |
| pcaac381.alanine                    | -0.009878239 | 0.015527153 | 0.525713205 |
| asymmetricdimethylarginine.c51dc    | -0.05767814  | 0.090674623 | 0.525772411 |
| pcaac365.serine                     | -0.019702422 | 0.030979823 | 0.525853116 |
| lysopcac203.smc241                  | 0.008815051  | 0.013862627 | 0.525911533 |
| lysopcac180.pcaec422                | -0.020156916 | 0.03169971  | 0.525921512 |
| alphaaminoadipicacid.alanine        | 0.006191933  | 0.009738575 | 0.525957661 |
| pcaec403.pcaec363                   | 0.022561214  | 0.035490255 | 0.526031359 |
| asymmetricdimethylarginine.pcaac34  | 0.00954784   | 0.015023556 | 0.526146449 |
| acetylorithoine.c3                  | 0.021131118  | 0.033251297 | 0.526164042 |
| pcaac405.pcaac380                   | -0.02266431  | 0.035664856 | 0.526175318 |
| c18.c102                            | -0.014673997 | 0.023107436 | 0.526465693 |
| pcaec322.c12                        | 0.021411848  | 0.033723711 | 0.526539749 |
| pcaac320.alphaaminoadipicacid       | 0.003041855  | 0.0047917   | 0.526606189 |
| pcaac365.pcaac322                   | 0.038406505  | 0.060502056 | 0.52661972  |
| smohc222.ornithine                  | -0.016825717 | 0.026510741 | 0.526698558 |
| phenylalanine.serine                | -0.00838618  | 0.013213718 | 0.526710503 |
| pcaec363.pcaac281                   | 0.000903548  | 0.001423969 | 0.526794749 |
| pcaec365.pcaac344                   | 0.021349845  | 0.033653596 | 0.526877667 |
| pcaec362.methionine                 | -0.022979092 | 0.036223036 | 0.526892152 |
| lysopcac180.tyrosine                | -0.025839458 | 0.040743255 | 0.527006482 |

|                              |              |             |             |
|------------------------------|--------------|-------------|-------------|
| smc260.pcaec406              | 0.001982405  | 0.003126114 | 0.527044729 |
| pcaec321.pcaec300            | -0.038160099 | 0.06018417  | 0.527101913 |
| smc240.pcaec420              | 0.007886849  | 0.012438983 | 0.527110061 |
| creatinine.pcaec424          | -0.007433227 | 0.011725146 | 0.527166571 |
| pcaec421.c162                | 0.029326316  | 0.046260111 | 0.527174461 |
| lysopcac203.smohc241         | 0.040908425  | 0.064530877 | 0.527179822 |
| alphaaminoadipicacid.serine  | 0.009388378  | 0.01480977  | 0.527182609 |
| lysine.pcaec426              | -0.023618941 | 0.037261218 | 0.527219545 |
| c14.pcaec343                 | 0.028359672  | 0.044742344 | 0.527239401 |
| pcaec406.pcaec420            | -0.052457892 | 0.082783756 | 0.527350283 |
| c182.c8                      | -0.023716089 | 0.037432341 | 0.527416384 |
| smc260.pcaec364              | 0.008862592  | 0.013989358 | 0.527447841 |
| pcaec422.pcaec385            | -0.02747935  | 0.043375438 | 0.527448198 |
| smc161.pcaec362              | 0.006712392  | 0.010597135 | 0.527518225 |
| c4.phenylalanine             | 0.01140896   | 0.018013868 | 0.527565427 |
| pcaec362.pcaec425            | 0.05541719   | 0.087516061 | 0.527643606 |
| pcaec363.lysopcac140         | -0.0006192   | 0.000977917 | 0.52766968  |
| pcaec382.pcaec405            | 0.090762143  | 0.143358173 | 0.527714272 |
| c181.c142                    | 0.021235087  | 0.033541749 | 0.527727504 |
| asparticacid.alanine         | 0.01784739   | 0.02819087  | 0.527729494 |
| pcaec403.pcaec344            | 0.045820614  | 0.072376582 | 0.527732734 |
| smc160.c18                   | -0.01417515  | 0.022394857 | 0.527811957 |
| pcaec360.pcaec365            | -0.013854992 | 0.021889459 | 0.527819647 |
| pcaec386.lysopcac280         | 0.003966541  | 0.006267692 | 0.527883207 |
| pcaec362.transhydroxyproline | 0.011232166  | 0.017749068 | 0.527898673 |
| pcaec384.pcaec385            | 0.031933857  | 0.050462525 | 0.527903954 |
| pcaec342.pcaec340            | 0.070771339  | 0.111848846 | 0.52795755  |
| pcaec341.pcaec446            | -0.025285901 | 0.03996825  | 0.528016941 |
| pcaec386.pcaec344            | -0.048315033 | 0.076373481 | 0.52803934  |
| c182.smc261                  | -0.018417076 | 0.029112626 | 0.52803971  |
| c181.pcaec420                | -0.061230814 | 0.096798214 | 0.528074442 |
| pcaec402.pcaec385            | -0.008845937 | 0.013984532 | 0.528080893 |
| smohc161.lysopcac161         | 0.030546705  | 0.04829566  | 0.528118478 |
| putrescine.pcaec366          | -0.003439412 | 0.005437984 | 0.528127926 |
| c51.pcaec424                 | 0.004364697  | 0.006901627 | 0.528169364 |
| pcaec240.pcaec446            | 0.045095602  | 0.071308412 | 0.528178073 |
| pcaec321.c102                | 0.023002187  | 0.036374417 | 0.528197354 |
| pcaec380.asparagine          | -0.005947284 | 0.009405202 | 0.528218767 |
| c2.c12                       | -0.049919606 | 0.078950789 | 0.528252763 |
| pcaec386.glutamine           | -0.005935241 | 0.009387291 | 0.528268524 |
| smc161.pcaec424              | -0.009122042 | 0.01442879  | 0.528302541 |
| lysopcac203.pcaec446         | -0.018715225 | 0.029604987 | 0.528332891 |
| citruiline.pcaec384          | 0.004728513  | 0.007480968 | 0.528392966 |
| pcaec401.pcaec362            | 0.009187106  | 0.01453955  | 0.528524792 |
| pcaec401.c141                | -0.019476668 | 0.03083381  | 0.528657771 |

|                                |              |             |             |
|--------------------------------|--------------|-------------|-------------|
| pcaac383.c182                  | 0.022540089  | 0.035689283 | 0.528723797 |
| pcaec363.lysopcac160           | -0.009030679 | 0.014299655 | 0.528745565 |
| pcaac421.pcaec380              | 0.042431919  | 0.067197779 | 0.528799658 |
| lysopcac170.c16                | 0.019031726  | 0.030142808 | 0.528840669 |
| pcaac405.pcaac422              | -0.011312    | 0.017918384 | 0.528891738 |
| pcaac362.glutamicacid          | -0.017530895 | 0.02777478  | 0.528974275 |
| pcaec362.pcaac422              | -0.011817983 | 0.018726044 | 0.529027438 |
| lysopcac160.methionine         | -0.015927613 | 0.02524408  | 0.529128014 |
| pcaec402.pcaec342              | 0.042682592  | 0.067658432 | 0.529187009 |
| lysopcac161.pcaac424           | -0.0026434   | 0.004190641 | 0.529231038 |
| pcaec423.smc161                | 0.049937787  | 0.079180642 | 0.529299298 |
| c18.pcaac240                   | -0.010082286 | 0.015991599 | 0.529434812 |
| prolinr.pcaac364               | 0.02356365   | 0.037378466 | 0.529478413 |
| pcaac384.c141oh                | 0.054683547  | 0.086748613 | 0.529503931 |
| pcaac381.smc260                | -0.02214286  | 0.03513086  | 0.529550515 |
| prolinr.threonine              | 0.028996491  | 0.046005736 | 0.52956135  |
| c16.creatinine                 | -0.006476871 | 0.010278808 | 0.529666379 |
| spermidine.c5                  | 0.023773247  | 0.037732204 | 0.529710068 |
| kynurenine.c16                 | -0.01680483  | 0.026673862 | 0.529736685 |
| pcaac421.c16                   | 0.012788079  | 0.020299685 | 0.529767166 |
| lysopcac160.smc240             | 0.028924297  | 0.045923976 | 0.52985484  |
| c182.pcaac385                  | 0.009750915  | 0.015482477 | 0.529872268 |
| smc181.pcaec403                | -0.018502687 | 0.029392446 | 0.530066993 |
| c3.pcaac366                    | 0.017527387  | 0.027846483 | 0.530116393 |
| pcaac386.c182                  | 0.016407039  | 0.026069505 | 0.530163114 |
| pcaac402.putrescine            | -0.031400862 | 0.049895355 | 0.530178227 |
| pcaec386.glutamine             | -0.010189841 | 0.016193288 | 0.530224638 |
| alanine.histidine              | -0.029095805 | 0.04623862  | 0.53023112  |
| pcaec365.pcaec363              | -0.018223462 | 0.028966581 | 0.530317982 |
| pcaec361.pcaec362              | 0.010383501  | 0.016506932 | 0.530371096 |
| pcaec420.pcaec340              | 0.022611087  | 0.035947406 | 0.530393395 |
| pcaac385.lysopcac204           | -0.007906135 | 0.012569779 | 0.530409765 |
| pcaac341.pcaac360              | -0.02320278  | 0.036894147 | 0.530460819 |
| glutamine.smc241               | 0.010416727  | 0.016570715 | 0.530642794 |
| alphaaminoadipicacid.smc202    | -0.019449698 | 0.03094268  | 0.530675955 |
| pcaec380.smc260                | -0.016418482 | 0.026123595 | 0.530727816 |
| smc202.c4                      | 0.008707561  | 0.013856316 | 0.530776314 |
| prolinr.c182                   | 0.030122272  | 0.047939825 | 0.530830586 |
| acetylmithoine.pcaec343        | 0.013965939  | 0.022230204 | 0.530891596 |
| lysopcac280.pcaac384           | 0.02028508   | 0.032289202 | 0.530898485 |
| pcaac341.pcaac381              | 0.010655479  | 0.016962625 | 0.530935802 |
| alphaaminoadipicacid.glutamine | 0.004135384  | 0.006587621 | 0.531212182 |
| glutamine.kynurenine           | -0.007433976 | 0.01184409  | 0.531276207 |
| pcaec300.taurine               | 0.016955985  | 0.027018047 | 0.531323777 |
| c141oh.smc180                  | -0.005523921 | 0.008802564 | 0.531352814 |



|                              |              |             |             |
|------------------------------|--------------|-------------|-------------|
| pcaac402.lysopcac204         | 0.051561714  | 0.082167346 | 0.531362455 |
| c142.pcaec406                | -0.002652992 | 0.004227897 | 0.53137808  |
| pcaec364.lysopcac204         | -0.011354554 | 0.018103377 | 0.531567843 |
| pcaec361.pcaac323            | -0.047678803 | 0.07602774  | 0.531621843 |
| c141oh.spermidine            | 0.035670964  | 0.056881235 | 0.531628861 |
| lysopcac280.pcaac321         | 0.009462146  | 0.015088426 | 0.531628994 |
| arginine.pcaec385            | 0.019340729  | 0.030840988 | 0.531630059 |
| smc161.pcaac361              | -0.02718497  | 0.0433498   | 0.531632704 |
| alphaaminoadipicacid.smc241  | -0.011100477 | 0.017702619 | 0.531668209 |
| pcaac405.smohc222            | -0.003804058 | 0.006066795 | 0.531683545 |
| citruline.pcaec340           | 0.01874353   | 0.029895019 | 0.531716878 |
| pcaec383.c101                | 0.011548377  | 0.018421422 | 0.531768544 |
| pcaec443.lysopcac180         | -0.035849275 | 0.057188092 | 0.531790258 |
| phenylalanine.c51            | -0.020583587 | 0.032837606 | 0.531814042 |
| pcaac343.methionine          | -0.01631336  | 0.026030439 | 0.531896705 |
| pcaac366.c3                  | 0.013640194  | 0.021765484 | 0.53190588  |
| pcaec322.lysopcac161         | 0.038377386  | 0.061239558 | 0.531914244 |
| phenylalanine.leucine        | -0.010963698 | 0.017496445 | 0.53194828  |
| pcaac343.lysopcac204         | -0.010634431 | 0.016972797 | 0.531992064 |
| pcaac380.phenylalanine       | 0.016115674  | 0.025726727 | 0.53208345  |
| pcaec386.c12                 | 0.023846464  | 0.038068546 | 0.532089324 |
| histidine.c182               | 0.036684202  | 0.0585814   | 0.532219794 |
| methioninesulfoxide.pcaec363 | 0.019802015  | 0.031628069 | 0.532297693 |
| pcaec365.lysopcac161         | -0.049099327 | 0.078423341 | 0.532303835 |
| c10.smc180                   | -0.008305741 | 0.013270591 | 0.532437767 |
| pcaec362.pcaac403            | -0.001734728 | 0.002771758 | 0.532449099 |
| pcaac421.smc261              | 0.017744231  | 0.028355234 | 0.532498256 |
| pcaec380.lysopcac161         | 0.031403837  | 0.050184071 | 0.532504947 |
| pcaac366.smc241              | 0.006849869  | 0.010946498 | 0.532514167 |
| smc160.pcaac360              | -0.036321259 | 0.058046886 | 0.532537803 |
| c141oh.smohc141              | 0.008655234  | 0.013833979 | 0.532585203 |
| lysopcac180.smohc222         | 0.002984385  | 0.004770184 | 0.532596539 |
| pcaac402.pcaac321            | 0.006522666  | 0.010426146 | 0.53261379  |
| pcaec340.pcaac420            | 0.051666036  | 0.08258788  | 0.532625567 |
| pcaec340.pcaec422            | -0.019344354 | 0.030922366 | 0.532632454 |
| ornithine.pcaac405           | 0.016401894  | 0.026223294 | 0.532702883 |
| pcaec403.pcaec340            | -0.028147641 | 0.045006988 | 0.532745005 |
| pcaac381.pcaec386            | -0.03094811  | 0.049488657 | 0.532776653 |
| histidine.lysopcac182        | -0.011226741 | 0.017952971 | 0.532787097 |
| h1.taurine                   | -0.031692551 | 0.0506813   | 0.532794564 |
| lysopcac181.pcaac424         | -0.001952296 | 0.003122126 | 0.532808057 |
| smohc161.c14                 | -0.019532031 | 0.031238984 | 0.532850103 |
| pcaac426.pcaac365            | 0.030815645  | 0.049292904 | 0.53291005  |
| c101.pcaec365                | -0.008510127 | 0.013612956 | 0.532913106 |
| pcaac405.pcaec406            | 0.00321246   | 0.005139494 | 0.532975441 |

|                                    |              |             |             |
|------------------------------------|--------------|-------------|-------------|
| pcaec384.pcaac381                  | -0.019644117 | 0.031428311 | 0.53298104  |
| pcaac403.pcaec384                  | -0.027356889 | 0.043774806 | 0.533046011 |
| glutamicacid.pcaec361              | 0.001722155  | 0.002755707 | 0.533049141 |
| pcaec403.smc161                    | 0.049087233  | 0.078560322 | 0.533118686 |
| methionine.lysopcac281             | -0.006725248 | 0.010763666 | 0.533134869 |
| pcaac341.pcaec361                  | -0.007056844 | 0.011294441 | 0.533137067 |
| pcaec364.threonine                 | 0.016123089  | 0.025806872 | 0.533168047 |
| pcaec381.pcaac322                  | 0.026849379  | 0.042975669 | 0.533169257 |
| pcaec361.smc241                    | 0.014263586  | 0.022832396 | 0.53320161  |
| smc180.smc240                      | -0.01461552  | 0.023397235 | 0.533227509 |
| isoleucine.arginine                | 0.032458012  | 0.051962918 | 0.533247591 |
| smc181.pcaac420                    | 0.035828853  | 0.057360686 | 0.533256833 |
| pcaec364.methioninesulfoxide       | 0.004500244  | 0.007207042 | 0.533388188 |
| pcaac426.serotonin                 | -0.048209812 | 0.077212839 | 0.53341934  |
| pcaec422.pcaac300                  | -0.028312427 | 0.0453617   | 0.533568156 |
| histidine.smc241                   | 0.006177883  | 0.009898634 | 0.533590154 |
| c14.pcaac383                       | 0.002443516  | 0.003917009 | 0.533781905 |
| pcaac361.pcaac344                  | -0.037754355 | 0.060525433 | 0.533811467 |
| lysopcac160.ornithine              | -0.042180924 | 0.067624916 | 0.533830095 |
| c101.smc180                        | 0.009410654  | 0.015088345 | 0.533859372 |
| pcaac425.pcaac385                  | -0.014668165 | 0.023517922 | 0.533860677 |
| pcaac420.tyrosine                  | -0.029566036 | 0.04741587  | 0.533961733 |
| lysopcac281.pcaac342               | 0.006014879  | 0.009649822 | 0.534113842 |
| pcaac381.c14                       | -0.025261401 | 0.040532453 | 0.534163722 |
| c51dc.pcaac422                     | 0.009096091  | 0.014598861 | 0.53427535  |
| c0.pcaec421                        | 0.001248676  | 0.002004189 | 0.534298491 |
| c5.pcaac300                        | 0.046330476  | 0.074364235 | 0.534306516 |
| lysopcac181.pcaac360               | -0.023021481 | 0.036955605 | 0.534353228 |
| pcaac323.asymmetricdimethylarginir | 0.015069349  | 0.024192599 | 0.534391749 |
| lysopcac160.pcaec420               | 0.023687401  | 0.038040983 | 0.534529202 |
| pcaec360.pcaec445                  | -0.02799863  | 0.04497135  | 0.534590101 |
| smc260.threonine                   | -0.021033532 | 0.033786946 | 0.534625427 |
| pcaec445.smc241                    | -0.045416909 | 0.07296386  | 0.534675679 |
| pcaac405.c16                       | 0.014389001  | 0.023118211 | 0.534707005 |
| pcaac366.pcaec322                  | -0.044758887 | 0.071917955 | 0.534739386 |
| smohc141.pcaac385                  | -0.012705759 | 0.020416019 | 0.534751027 |
| methioninesulfoxide.serine         | 0.097718923  | 0.157054459 | 0.534846031 |
| pcaac321.lysopcac281               | 0.006720169  | 0.010801453 | 0.534874543 |
| leucine.lysopcac170                | -0.004819651 | 0.007747041 | 0.534891763 |
| pcaec362.alanine                   | -0.006943386 | 0.011161493 | 0.534920598 |
| pcaac323.pcaac362                  | 0.011846428  | 0.0190434   | 0.534926299 |
| c12.pcaac343                       | 0.009205764  | 0.014798875 | 0.534937382 |
| pcaac364.pcaec362                  | -0.008256044 | 0.013273915 | 0.534992001 |
| lysopcac203.smohc141               | 0.011932261  | 0.019186167 | 0.535028076 |
| acetylorlithoine.pcaec443          | 0.019007179  | 0.030565126 | 0.535068503 |

|                              |              |             |             |
|------------------------------|--------------|-------------|-------------|
| pcaec363.pcaec340            | -0.04068965  | 0.065433399 | 0.535075079 |
| pcaec343.putrescine          | 0.016500934  | 0.026537298 | 0.535105735 |
| pcaac321.lysine              | 0.037612873  | 0.060494764 | 0.535136801 |
| pcaec322.pcaec341            | 0.040224766  | 0.064702645 | 0.535181137 |
| pcaec322.pcaac405            | -0.028157059 | 0.045296443 | 0.535226479 |
| pcaec423.smc241              | 0.0101661    | 0.016358541 | 0.535332886 |
| c14.pcaac422                 | 0.010916796  | 0.017568783 | 0.535385721 |
| glycine.smc160               | -0.045307321 | 0.072928468 | 0.53546287  |
| pcaac360.pcaac424            | -0.005570687 | 0.008967722 | 0.535504789 |
| pcaac421.smc181              | 0.006191702  | 0.009968359 | 0.535542547 |
| smc260.lysopcac281           | -0.008228981 | 0.0132486   | 0.53555218  |
| pcaac341.threonine           | 0.011518595  | 0.018545694 | 0.535570633 |
| smohc141.smc241              | -0.045009951 | 0.072475184 | 0.535605545 |
| c162.pcaec386                | -0.006230684 | 0.01003304  | 0.535620615 |
| pcaec402.pcaac384            | -0.022511754 | 0.036250551 | 0.535628526 |
| lysopcac140.ornithine        | -0.015152118 | 0.024399925 | 0.535637779 |
| pcaac421.prolinr             | 0.013391707  | 0.021565674 | 0.535648991 |
| pcaec321.pcaac385            | -0.016381584 | 0.026383587 | 0.535696676 |
| smc241.putrescine            | 0.017473743  | 0.028144582 | 0.535725672 |
| pcaec322.serotonin           | 0.043645797  | 0.07030735  | 0.535772046 |
| pcaec425.smc260              | -0.020436323 | 0.032920872 | 0.535781679 |
| arginine.pcaac426            | -0.02786808  | 0.044897667 | 0.535826837 |
| pcaac381.creatinine          | 0.008740065  | 0.014082291 | 0.535866158 |
| pcaec342.pcaac343            | -0.012215543 | 0.019688388 | 0.535996229 |
| pcaac402.c51dc               | -0.081057333 | 0.130672955 | 0.53608624  |
| c8.pcaac422                  | 0.009719033  | 0.015668828 | 0.536105025 |
| lysopcac140.pcaec342         | 0.04453358   | 0.071797816 | 0.536114573 |
| lysopcac170.valine           | -0.036092706 | 0.058203858 | 0.536216459 |
| pcaac343.c101                | -0.003314778 | 0.00534554  | 0.536220944 |
| c5.isoleucine                | 0.014698858  | 0.02370677  | 0.536269366 |
| pcaec422.kynurenine          | -0.003453733 | 0.0055703   | 0.536270297 |
| pcaec383.pcaac322            | 0.035734395  | 0.057640985 | 0.536322012 |
| pcaac361.transhydroxyproline | -0.01386592  | 0.022367651 | 0.536347047 |
| smc240.lysopcac281           | 0.006312212  | 0.010184162 | 0.53641455  |
| pcaec300.arginine            | -0.023953177 | 0.038647886 | 0.536432247 |
| c51.pcaac380                 | 0.02253927   | 0.03636876  | 0.536456634 |
| pcaec340.pcaac422            | -0.018505181 | 0.029861867 | 0.536489415 |
| pcaec406.pcaec446            | 0.075725423  | 0.122217761 | 0.536554036 |
| pcaac406.pcaac366            | 0.03152412   | 0.050880248 | 0.536566807 |
| pcaac406.pcaec322            | -0.03096637  | 0.049987557 | 0.536628031 |
| c16.pcaec425                 | -0.009982328 | 0.016114817 | 0.536648587 |
| pcaac402.pcaec321            | -0.02789819  | 0.045040872 | 0.536683433 |
| lysine.pcaac386              | 0.010865483  | 0.017544547 | 0.536741805 |
| pcaac361.phenylalanine       | 0.018560982  | 0.029973002 | 0.536775716 |
| pcaec362.lysopcac170         | -0.004892882 | 0.007901682 | 0.536799608 |

|                                   |              |             |             |
|-----------------------------------|--------------|-------------|-------------|
| pcaac323.smc241                   | 0.00684475   | 0.011053962 | 0.536804819 |
| pcaec444.pcaac424                 | 0.008332829  | 0.013459545 | 0.536877409 |
| pcaac402.smc202                   | -0.044859586 | 0.072470738 | 0.536942489 |
| pcaec382.c18                      | 0.031333258  | 0.050619517 | 0.536947189 |
| c51dc.pcaec445                    | 0.024043289  | 0.038845971 | 0.536984313 |
| smc160.asymmetricdimethylarginine | 0.012656637  | 0.020451942 | 0.537044338 |
| lysine.pcaac341                   | 0.001916563  | 0.003097167 | 0.537067938 |
| smohc221.smc241                   | 0.007222821  | 0.011675586 | 0.537189992 |
| pcaac424.pcaac321                 | 0.007662     | 0.01238602  | 0.537206653 |
| pcaec444.pcaec363                 | -0.020906171 | 0.033803382 | 0.537296492 |
| pcaec341.c51                      | -0.024057809 | 0.038903901 | 0.537344599 |
| pcaec404.c101                     | 0.010895893  | 0.017621262 | 0.537379301 |
| pcaac321.threonine                | 0.01216137   | 0.019667925 | 0.537381059 |
| c141.pcaac425                     | -0.029995477 | 0.048521296 | 0.537475147 |
| asparticacid.pcaac323             | 0.060748464  | 0.098272975 | 0.5374959   |
| pcaac401.lysopcac160              | -0.027833601 | 0.0450277   | 0.537506719 |
| pcaec422.pcaac424                 | -0.009336607 | 0.01510545  | 0.537538707 |
| pcaac401.pcaec342                 | 0.052367777  | 0.084726109 | 0.537546712 |
| pcaac300.alanine                  | -0.013089502 | 0.021177768 | 0.537550371 |
| pcaac420.lysine                   | -0.054888775 | 0.088819411 | 0.537613327 |
| leucine.smohc221                  | -0.028688279 | 0.046427724 | 0.537658727 |
| pcaec424.pcaac406                 | 0.019933169  | 0.032260476 | 0.537678854 |
| glutamicacid.pcaec301             | 0.016415916  | 0.026569413 | 0.537699814 |
| pcaac386.pcaec402                 | 0.017379377  | 0.028139337 | 0.537852062 |
| c12.pcaac322                      | -0.016453306 | 0.02664051  | 0.537861119 |
| acetylmithoine.c51                | 0.025438916  | 0.041191719 | 0.537881645 |
| c2.pcaec403                       | 0.016874261  | 0.027324701 | 0.537899742 |
| serine.pcaec301                   | 0.028342512  | 0.045896538 | 0.537909942 |
| phenylalanine.smc161              | 0.036311257  | 0.058808436 | 0.537963003 |
| pcaec300.pcaec342                 | 0.058866758  | 0.095346569 | 0.537997222 |
| pcaec361.smc181                   | 0.002920936  | 0.00473157  | 0.538042444 |
| spermidine.lysopcac180            | -0.063439868 | 0.102775442 | 0.538083332 |
| glycine.pcaec422                  | 0.015803206  | 0.025603169 | 0.538103368 |
| smc180.methioninesulfoxide        | 0.004784899  | 0.007752258 | 0.538109787 |
| pcaec300.pcaec422                 | -0.017510704 | 0.028375296 | 0.538185854 |
| pcaec424.smc181                   | 0.003953014  | 0.006406541 | 0.538240494 |
| pcaec403.pcaac366                 | -0.007650477 | 0.012399211 | 0.538250106 |
| pcaec322.asparagine               | 0.005376438  | 0.008714017 | 0.538267124 |
| lysopcac281.pcaec361              | 0.018181759  | 0.029469659 | 0.538281569 |
| c162.glutamicacid                 | -0.027665184 | 0.044842858 | 0.538300711 |
| methioninesulfoxide.smc261        | 0.017977966  | 0.02914983  | 0.538427532 |
| pcaac362.lysopcac160              | -0.025039139 | 0.040600927 | 0.538447231 |
| pcaac424.pcaec322                 | 0.031146813  | 0.050507866 | 0.538474172 |
| pcaec343.c102                     | 0.011397435  | 0.018487217 | 0.538585321 |
| pcaac362.pcaec405                 | -0.028109159 | 0.045597696 | 0.538613922 |

|                                  |              |             |             |
|----------------------------------|--------------|-------------|-------------|
| pcaac322.pcaec363                | 0.016370763  | 0.026556889 | 0.538626277 |
| pcaec300.smc181                  | 0.020287447  | 0.032910748 | 0.538628208 |
| c14.pcaec385                     | -0.024139201 | 0.039160509 | 0.538642294 |
| pcaac281.citruline               | 0.041104988  | 0.066685209 | 0.538651217 |
| pcaec405.pcaec406                | 0.020071295  | 0.032563123 | 0.538665848 |
| pcaec360.smc181                  | 0.016742784  | 0.027168941 | 0.538753972 |
| pcaac362.pcaac384                | -0.026089935 | 0.042339096 | 0.53877596  |
| arginine.pcaec300                | 0.010055266  | 0.016318544 | 0.538793923 |
| pcaac363.c4                      | -0.008529997 | 0.013845022 | 0.538847074 |
| pcaec383.pcaac422                | -0.076045384 | 0.123447458 | 0.538907304 |
| ornithine.lysopcac204            | 0.013796325  | 0.022401204 | 0.538999389 |
| smohc221.pcaec421                | 0.000681666  | 0.001107291 | 0.539169502 |
| pcaac240.putrescine              | -0.016193837 | 0.026312139 | 0.539277846 |
| pcaac360.pcaac366                | -0.009097785 | 0.014784249 | 0.539331221 |
| lysopcac180.smc240               | -0.02990309  | 0.048600741 | 0.539390187 |
| pcaac322.pcaac343                | -0.012654259 | 0.02056958  | 0.539447904 |
| c101.pcaec361                    | -0.004455718 | 0.00724375  | 0.539501112 |
| c3.putrescine                    | -0.018396163 | 0.029907595 | 0.539509008 |
| pcaec341.pcaac425                | -0.043987385 | 0.071518351 | 0.539541755 |
| smohc222.glycine                 | -0.052588593 | 0.085503227 | 0.539543251 |
| pcaac365.c51                     | -0.031293544 | 0.050883002 | 0.539568453 |
| lysopcac170.pcaac240             | 0.005745191  | 0.009341965 | 0.539583174 |
| pcaac321.pcaac385                | -0.021255323 | 0.034563096 | 0.539593581 |
| lysopcac280.pcaec362             | 0.007047031  | 0.011459319 | 0.539600736 |
| pcaac424.c51                     | -0.047556153 | 0.077336274 | 0.539623044 |
| pcaac364.pcaac320                | 0.046150408  | 0.075053316 | 0.53963965  |
| pcaac405.pcaac404                | 0.016552082  | 0.026919184 | 0.539653561 |
| arginine.c8                      | -0.02610683  | 0.042463084 | 0.539698435 |
| asparagine.pcaac424              | -0.007591506 | 0.012347969 | 0.539707944 |
| pcaec383.pcaac362                | -0.006724373 | 0.010939813 | 0.539792298 |
| c141oh.methionine                | 0.013961631  | 0.022716392 | 0.539834369 |
| c101.c4                          | 0.00852088   | 0.013865197 | 0.539870149 |
| pcaac300.pcaec341                | -0.040563651 | 0.066016894 | 0.539941397 |
| putrescine.h1                    | -0.001256245 | 0.002044527 | 0.539941829 |
| pcaac323.pcaac383                | -0.002976579 | 0.004845047 | 0.539999717 |
| alphaaminoadipicacid.lysopcac170 | -0.003437662 | 0.005595758 | 0.540013856 |
| c181.pcaec443                    | -0.038084974 | 0.061999334 | 0.540048844 |
| pcaec404.pcaec383                | 0.146575267  | 0.238628726 | 0.540075555 |
| h1.pcaac385                      | 0.014187183  | 0.023100376 | 0.540132255 |
| pcaec365.threonine               | 0.023518663  | 0.038295239 | 0.540140889 |
| pcaac420.prolinr                 | 0.013023465  | 0.021208168 | 0.540182286 |
| pcaec423.phenylalanine           | -0.024659588 | 0.040159185 | 0.540203239 |
| pcaac424.ornithine               | 0.031102225  | 0.050652721 | 0.540214639 |
| smohc161.lysopcac182             | -0.015201905 | 0.024760937 | 0.540268432 |
| pcaec364.pcaec383                | 0.023278471  | 0.037919899 | 0.540309088 |

|                                    |              |             |             |
|------------------------------------|--------------|-------------|-------------|
| prolinr.glutamicacid               | 0.032979686  | 0.053736583 | 0.540412279 |
| pcaac360.c102                      | 0.019562373  | 0.031876767 | 0.540439484 |
| pcaac444.pcaac403                  | 0.024962096  | 0.040677064 | 0.540454217 |
| c10.asymmetricdimethylarginine     | 0.005803012  | 0.009457463 | 0.540503229 |
| pcaac420.taurine                   | -0.025988515 | 0.042355254 | 0.540507544 |
| pcaec444.pcaec423                  | 0.007415158  | 0.012086339 | 0.540552754 |
| pcaac386.c51dc                     | -0.057497007 | 0.093727258 | 0.540595848 |
| pcaac363.pcaac425                  | -0.053629259 | 0.087423285 | 0.54060018  |
| smohc222.acetylmithoine            | -0.033030371 | 0.053845663 | 0.540611316 |
| creatinine.pcaec383                | 0.034858643  | 0.056827914 | 0.540624308 |
| pcaac421.c102                      | -0.016975531 | 0.027680109 | 0.540711049 |
| pcaec446.pcaac404                  | 0.002326508  | 0.003794204 | 0.540777862 |
| c5.pcaec342                        | -0.054310952 | 0.088582554 | 0.540819351 |
| pcaec386.serine                    | 0.04278766   | 0.069802146 | 0.540902598 |
| smc160.smohc141                    | 0.044385816  | 0.072416971 | 0.540945316 |
| pcaac384.pcaac281                  | 0.000822386  | 0.001342281 | 0.541104749 |
| pcaac322.pcaac422                  | -0.0136579   | 0.02229536  | 0.541163421 |
| arginine.c51dc                     | -0.059325451 | 0.096852016 | 0.541197865 |
| asymmetricdimethylarginine.pcaec36 | -0.008129483 | 0.013272998 | 0.54123366  |
| pcaec384.pcaac386                  | 0.007794081  | 0.012725603 | 0.5412405   |
| pcaac344.lysopcac204               | -0.009273199 | 0.015141435 | 0.541262831 |
| pcaac364.c16                       | 0.012320048  | 0.020118291 | 0.541301147 |
| pcaac342.smohc141                  | 0.009180961  | 0.014992826 | 0.541316647 |
| lysopcac170.lysopcac182            | -0.017342187 | 0.028320514 | 0.541318445 |
| pcaec342.methioninesulfoxide       | 0.004907513  | 0.008016556 | 0.541438455 |
| leucine.phenylalanine              | 0.0508581    | 0.083090891 | 0.541500707 |
| smc181.lysopcac204                 | 0.019768812  | 0.032301318 | 0.541543838 |
| pcaec420.alphaaminoadipicacid      | 0.00223431   | 0.003650766 | 0.54154473  |
| methioninesulfoxide.lysopcac161    | 0.083192954  | 0.135942629 | 0.5415712   |
| smc180.pcaac323                    | -0.058986592 | 0.096391754 | 0.541587434 |
| pcaec384.c12                       | 0.026072843  | 0.042606479 | 0.541588062 |
| pcaac363.pcaec382                  | 0.00429548   | 0.007019681 | 0.541605174 |
| glycine.pcaac360                   | -0.025259282 | 0.0412835   | 0.541651506 |
| pcaac386.pcaec380                  | -0.035574992 | 0.058148416 | 0.541686424 |
| alanine.pcaac383                   | 0.003293267  | 0.005383198 | 0.541705247 |
| c51.smohc221                       | 0.025879501  | 0.042303633 | 0.54171308  |
| pcaec403.lysopcac182               | -0.025887082 | 0.04232008  | 0.541751758 |
| pcaec403.h1                        | 0.001320096  | 0.002158185 | 0.541770175 |
| pcaac424.c0                        | 0.000620025  | 0.001013684 | 0.541779804 |
| pcaec386.smc241                    | 0.030575726  | 0.04999913  | 0.54186539  |
| pcaac365.c101                      | -0.003214412 | 0.00525789  | 0.541980895 |
| alanine.c141                       | 0.016460922  | 0.026925663 | 0.541982997 |
| pcaec443.pcaac363                  | -0.009018222 | 0.014752488 | 0.542012803 |
| lysopcac203.smohc161               | -0.013679497 | 0.022383352 | 0.542115596 |
| c101.methionine                    | 0.031083531  | 0.050863084 | 0.542131705 |

|                                    |              |             |             |
|------------------------------------|--------------|-------------|-------------|
| lysopcac204.pcaac424               | -0.002456456 | 0.004019819 | 0.542155076 |
| pcaac401.pcaac384                  | 0.020945544  | 0.034276712 | 0.542164384 |
| glutamicacid.h1                    | 0.002919958  | 0.00477849  | 0.542170496 |
| pcaac384.pcaac385                  | -0.00916005  | 0.014993159 | 0.542245898 |
| creatinine.glycine                 | -0.018948009 | 0.031018019 | 0.542297123 |
| c181.c141oh                        | 0.078263888  | 0.128120463 | 0.542303268 |
| c16.pcaec445                       | -0.039138677 | 0.064071255 | 0.542303268 |
| asparticacid.pcaec445              | 0.036110805  | 0.059120666 | 0.542345108 |
| smohc241.pcaec343                  | 0.030154311  | 0.049371283 | 0.54236633  |
| glutamine.pcaac404                 | -0.003944919 | 0.006459031 | 0.542370336 |
| lysopcac203.pcaec301               | 0.02554787   | 0.041832736 | 0.542400284 |
| pcaec401.tryptophan                | -0.003364054 | 0.005509093 | 0.542451884 |
| c181.pcaac362                      | 0.00408604   | 0.006693149 | 0.54255466  |
| c4.smohc161                        | 0.009327707  | 0.015279806 | 0.542568631 |
| pcaac386.pcaac401                  | 0.01640213   | 0.026869513 | 0.542584061 |
| c142.pcaac362                      | 0.002669927  | 0.004373931 | 0.542596163 |
| pcaec342.smc260                    | 0.020634128  | 0.033804068 | 0.542605685 |
| alanine.asymmetricdimethylarginine | -0.007259878 | 0.011894495 | 0.542637048 |
| leucine.pcaac384                   | -0.03023729  | 0.049542964 | 0.542657905 |
| pcaec406.c101                      | -0.032656612 | 0.053510377 | 0.542683667 |
| ornithine.threonine                | 0.012340982  | 0.020224693 | 0.542744304 |
| lysopcac280.lysopcac180            | -0.026837257 | 0.043982931 | 0.542757116 |
| smohc241.c16                       | -0.032138764 | 0.052675817 | 0.54279059  |
| c162.alphaaminoadipicacid          | -0.004279343 | 0.007014136 | 0.542804448 |
| pcaec364.c3                        | -0.009388565 | 0.015391134 | 0.54287341  |
| pcaac281.smc241                    | 0.017705772  | 0.029026261 | 0.542877913 |
| lysopcac170.c162                   | 0.040612811  | 0.066586224 | 0.542919751 |
| c16.pcaac424                       | 0.003833846  | 0.006286096 | 0.542942922 |
| pcaec364.lysopcac161               | 0.053906122  | 0.088390387 | 0.542962057 |
| pcaec363.pcaec383                  | -0.031449659 | 0.051574657 | 0.543011165 |
| c141oh.asparagine                  | -0.00736984  | 0.012087006 | 0.543049018 |
| pcaac322.pcaec405                  | -0.022786792 | 0.037372968 | 0.543061727 |
| pcaac360.c51dc                     | -0.067262344 | 0.110318979 | 0.543065285 |
| c8.pcaac322                        | 0.0191788    | 0.031458353 | 0.543098954 |
| pcaac384.ornithine                 | -0.012925232 | 0.021209726 | 0.543267888 |
| pcaac344.pcaac383                  | -0.004081683 | 0.006697945 | 0.543273027 |
| pcaec362.c102                      | 0.019108125  | 0.031362247 | 0.543353524 |
| pcaac320.pcaec364                  | 0.007195359  | 0.011810464 | 0.543377064 |
| pcaac404.pcaec406                  | 0.005617508  | 0.009220866 | 0.543389582 |
| pcaec364.c18                       | -0.017921079 | 0.029422002 | 0.543463795 |
| pcaac366.smc261                    | 0.023899714  | 0.039244988 | 0.543541114 |
| pcaac384.c142                      | 0.019230364  | 0.031582321 | 0.543601409 |
| pcaec425.pcaec445                  | 0.043914478  | 0.072122441 | 0.543607104 |
| pcaec361.pcaac364                  | 0.027771356  | 0.045612099 | 0.543625895 |
| pcaec360.taurine                   | 0.021954284  | 0.036058616 | 0.543632196 |

|                           |              |             |             |
|---------------------------|--------------|-------------|-------------|
| pcaec301.pcaac321         | 0.006981566  | 0.011467002 | 0.543638907 |
| smc181.smc160             | -0.055226497 | 0.090743748 | 0.543798446 |
| pcaac420.tryptophan       | 0.009288398  | 0.015265335 | 0.543887666 |
| acetylmethionine.pcaac420 | -0.042862947 | 0.070445163 | 0.543891017 |
| pcaec385.pcaac363         | 0.00482926   | 0.007937083 | 0.543901394 |
| pcaec300.smohc221         | 0.037879493  | 0.062258053 | 0.543911608 |
| pcaec405.lysopcac160      | 0.050614017  | 0.083193097 | 0.543934858 |
| pcaac300.smc240           | 0.032188882  | 0.052911007 | 0.543956759 |
| pcaec424.pcaec301         | 0.031813588  | 0.052297593 | 0.543983529 |
| lysopcac181.pcaec423      | -0.020346989 | 0.033449401 | 0.544001268 |
| c51dc.pcaac365            | 0.013111339  | 0.02156389  | 0.544116015 |
| pcaac422.smc160           | -0.020511617 | 0.033740025 | 0.544239515 |
| prolinr.pcaac300          | 0.027040515  | 0.044491991 | 0.544351868 |
| pcaac424.lysopcac281      | 0.007915312  | 0.013023722 | 0.54435205  |
| pcaec321.c101             | -0.004128759 | 0.006795208 | 0.544459589 |
| citruiline.arginine       | 0.015626957  | 0.025719773 | 0.544468317 |
| pcaac421.pcaec420         | 0.016330275  | 0.026877679 | 0.544473466 |
| pcaac344.pcaac240         | 0.017234736  | 0.02836766  | 0.544492538 |
| c8.smohc222               | -0.001241162 | 0.002043401 | 0.544590678 |
| pcaac323.methionine       | -0.02215679  | 0.036483444 | 0.544649933 |
| pcaec445.pcaec322         | -0.034780179 | 0.05727013  | 0.544656747 |
| kynurenine.pcaac361       | -0.017707161 | 0.029159041 | 0.544682591 |
| smc180.lysopcac181        | 0.021697528  | 0.035737023 | 0.544760123 |
| pcaec386.c101             | -0.00641789  | 0.010570843 | 0.5447687   |
| pcaac426.lysopcac182      | -0.008385688 | 0.013814375 | 0.544838219 |
| c181.smc261               | -0.037238675 | 0.061347767 | 0.544849316 |
| pcaac404.lysopcac204      | -0.006486029 | 0.010687585 | 0.544938226 |
| glutamicacid.serine       | 0.017185296  | 0.02831795  | 0.544942038 |
| pcaec385.pcaec402         | -0.028445976 | 0.046879842 | 0.544997976 |
| pcaec383.pcaac321         | 0.006766558  | 0.011152702 | 0.545041413 |
| pcaac386.serine           | 0.026197975  | 0.043184234 | 0.545083219 |
| asparticacid.smc202       | 0.031917344  | 0.052611933 | 0.545083231 |
| pcaec300.pcaec420         | 0.014199739  | 0.023408882 | 0.545122795 |
| c102.pcaac422             | 0.010475307  | 0.017271617 | 0.545183755 |
| glutamicacid.asparticacid | 0.051622887  | 0.085153103 | 0.545361159 |
| pcaac404.c162             | -0.036432413 | 0.060096895 | 0.545366615 |
| smc240.pcaac424           | 0.004426849  | 0.007302504 | 0.545378677 |
| serine.pcaac380           | 0.027908062  | 0.046038967 | 0.545395995 |
| c18.c142                  | 0.022399179  | 0.036951662 | 0.545401516 |
| smohc221.acetylmethionine | -0.041521911 | 0.068500828 | 0.545416873 |
| c14.pcaec406              | -0.002822567 | 0.004656713 | 0.545432364 |
| leucine.pcaac405          | 0.040253744  | 0.066415711 | 0.545459436 |
| pcaac420.glycine          | -0.02090678  | 0.034495373 | 0.545467882 |
| lysopcac203.pcaac383      | 0.003307924  | 0.005458588 | 0.545515044 |
| pcaac402.pcaac366         | -0.012385383 | 0.020438536 | 0.54552948  |



|                                    |              |             |             |
|------------------------------------|--------------|-------------|-------------|
| pcaac421.pcaec383                  | 0.046525132  | 0.076789898 | 0.545599793 |
| pcaac425.leucine                   | 0.010798781  | 0.017823734 | 0.545606691 |
| lysopcac280.pcaac405               | -0.033038017 | 0.054537192 | 0.545657371 |
| pcaec322.ornithine                 | -0.01275876  | 0.021062879 | 0.545685526 |
| isoleucine.pcaec383                | 0.042577769  | 0.070298337 | 0.545734349 |
| lysopcac280.pcaac300               | -0.022154965 | 0.036595382 | 0.545912626 |
| pcaec446.pcaec384                  | 0.013738916  | 0.022694642 | 0.545927088 |
| pcaec364.pcaec406                  | 0.031186994  | 0.051525248 | 0.545996987 |
| c141.pcaec383                      | 0.047133163  | 0.077872441 | 0.546006794 |
| pcaac361.pcaac380                  | -0.022851117 | 0.037755131 | 0.546017272 |
| pcaec365.lysopcac160               | -0.008355707 | 0.013806964 | 0.546060138 |
| c4.lysopcac182                     | 0.028936504  | 0.047818646 | 0.546093576 |
| pcaec361.c51dc                     | -0.066094349 | 0.109237072 | 0.546143886 |
| pcaec420.pcaec300                  | -0.028007126 | 0.046289155 | 0.546148495 |
| alanine.pcaac361                   | -0.014077629 | 0.023267652 | 0.546159863 |
| putrescine.pcaac422                | -0.008769529 | 0.014494996 | 0.546177208 |
| pcaac361.smc241                    | 0.02590401   | 0.042820224 | 0.546214224 |
| asparagine.serine                  | -0.002417887 | 0.003997032 | 0.546232407 |
| histidine.c18                      | 0.021117865  | 0.034913689 | 0.546273102 |
| pcaac364.pcaac322                  | 0.028219259  | 0.046657051 | 0.546297042 |
| pcaec420.lysopcac170               | -0.007692785 | 0.012719268 | 0.546303338 |
| c0.pcaac362                        | 0.015665521  | 0.025907891 | 0.546403643 |
| pcaec364.pcaec321                  | 0.02958113   | 0.048922412 | 0.546409073 |
| pcaec401.c8                        | -0.021924551 | 0.036260732 | 0.546420835 |
| pcaec404.pcaec301                  | 0.029694752  | 0.049112559 | 0.546427301 |
| c14.c142                           | 0.040284741  | 0.0666365   | 0.54648149  |
| pcaec340.creatinine                | 0.003028067  | 0.005010135 | 0.546585139 |
| pcaec405.pcaec301                  | 0.045597685  | 0.075444627 | 0.546586576 |
| prolinr.serine                     | -0.004188374 | 0.006930719 | 0.546630233 |
| smc161.asparticacid                | 0.012598009  | 0.020848919 | 0.546675207 |
| pcaec340.pcaac380                  | -0.027073354 | 0.044820951 | 0.546820322 |
| putrescine.alanine                 | -0.00634445  | 0.010505716 | 0.546905778 |
| asparagine.pcaac422                | -0.002650164 | 0.004388914 | 0.546954342 |
| pcaac363.lysopcac170               | -0.004196963 | 0.006950841 | 0.546970742 |
| c102.putrescine                    | -0.008697735 | 0.014404922 | 0.546973116 |
| pcaac362.c141oh                    | 0.049261436  | 0.081586079 | 0.546977032 |
| pcaec382.c51                       | -0.046326414 | 0.076730842 | 0.547006795 |
| asymmetricdimethylarginine.lysopca | -0.017991027 | 0.029802298 | 0.547055186 |
| glycine.pcaec421                   | 0.001092702  | 0.001810311 | 0.547108248 |
| pcaac240.c2                        | -0.068821854 | 0.114022345 | 0.54711953  |
| lysopcac204.c5                     | 0.010888707  | 0.018045137 | 0.547230354 |
| c14.pcaac322                       | -0.018583041 | 0.030799626 | 0.547271609 |
| pcaec444.phenylalanine             | -0.025351857 | 0.042026131 | 0.547346209 |
| lysopcac280.asymmetricdimethylarg  | -0.011092155 | 0.018387663 | 0.547347126 |
| pcaec384.ornithine                 | -0.018359287 | 0.030435048 | 0.547354084 |

|                                    |              |             |             |
|------------------------------------|--------------|-------------|-------------|
| citruiline.isoleucine              | 0.008468714  | 0.014038984 | 0.547354134 |
| pcaec444.lysopcac170               | -0.014991804 | 0.024853874 | 0.547374363 |
| pcaac420.pcaac363                  | 0.005784011  | 0.009589953 | 0.547417818 |
| pcaac364.pcaec444                  | -0.041634109 | 0.069034097 | 0.547442693 |
| asparticacid.pcaac421              | 0.024557819  | 0.040728325 | 0.547527788 |
| smohc141.smc202                    | 0.039568651  | 0.065633041 | 0.547587206 |
| c102.pcaec343                      | 0.03143473   | 0.052152762 | 0.547675884 |
| c141.citruiline                    | 0.035039528  | 0.058149234 | 0.547784679 |
| pcaac240.smohc241                  | 0.036705017  | 0.060917845 | 0.547815371 |
| pcaac341.pcaec422                  | 0.006962891  | 0.011557076 | 0.54785149  |
| c142.pcaec446                      | -0.018810321 | 0.031227865 | 0.547932267 |
| isoleucine.pcaec423                | 0.008342504  | 0.013850599 | 0.547956213 |
| kynurenine.pcaac381                | -0.019597093 | 0.032544347 | 0.54805909  |
| pcaec402.asymmetricdimethylarginir | 0.015695415  | 0.026067247 | 0.548094466 |
| pcaec364.pcaac361                  | 0.054417817  | 0.090378723 | 0.548096982 |
| smc202.pcaac300                    | -0.021651931 | 0.035961107 | 0.548107419 |
| pcaec364.serotonin                 | 0.04265699   | 0.07086281  | 0.548191817 |
| pcaac384.pcaac321                  | -0.011040671 | 0.018341384 | 0.548199607 |
| pcaec446.glutamicacid              | 0.034870881  | 0.057934419 | 0.548233739 |
| asparticacid.pcaac344              | 0.033763256  | 0.056100396 | 0.548277781 |
| pcaec423.pcaac366                  | -0.010579029 | 0.017584357 | 0.548424087 |
| lysopcac181.pcaec364               | -0.01189241  | 0.019770383 | 0.548483419 |
| citruiline.pcaec421                | 0.000987219  | 0.001641213 | 0.548489118 |
| smohc141.pcaec343                  | 0.028662576  | 0.047665352 | 0.548614333 |
| serine.isoleucine                  | -0.011711262 | 0.019480635 | 0.548717125 |
| pcaec364.alphaaminoadipicacid      | 0.001861786  | 0.003097939 | 0.5488492   |
| arginine.pcaec406                  | -0.008102919 | 0.013483133 | 0.548854906 |
| c8.pcaec363                        | -0.00830921  | 0.013827113 | 0.548875557 |
| pcaec386.pcaac281                  | 0.000702016  | 0.001168223 | 0.548881925 |
| glutamine.smc240                   | 0.028054839  | 0.046691983 | 0.548933237 |
| pcaec401.pcaec342                  | -0.057023428 | 0.094944154 | 0.549098946 |
| pcaec360.pcaec403                  | -0.00604918  | 0.010072072 | 0.549105733 |
| smc260.methionine                  | 0.017242366  | 0.028709989 | 0.549118481 |
| lysine.pcaec421                    | 0.000703719  | 0.001171894 | 0.549167363 |
| acetylnithoine.c51dc               | 0.066012268  | 0.109930268 | 0.549170342 |
| c141oh.pcaec342                    | -0.036001428 | 0.059955164 | 0.549183423 |
| c12.glutamine                      | -0.011163295 | 0.018593279 | 0.549235516 |
| lysopcac203.valine                 | -0.027981031 | 0.046619095 | 0.549360909 |
| pcaec341.pcaac320                  | 0.048628545  | 0.081021781 | 0.54937045  |
| leucine.pcaec423                   | 0.008443265  | 0.014067835 | 0.549376239 |
| c51dc.c12                          | -0.01963624  | 0.032720195 | 0.549413639 |
| acetylnithoine.pcaac366            | -0.006683822 | 0.011137515 | 0.549419054 |
| pcaec382.pcaac380                  | 0.036165629  | 0.060274188 | 0.549485064 |
| acetylnithoine.pcaec341            | 0.035681165  | 0.059475541 | 0.549543845 |
| pcaac405.pcaec341                  | 0.036625958  | 0.06105565  | 0.549578268 |

|                          |              |             |             |
|--------------------------|--------------|-------------|-------------|
| c4.alanine               | 0.004865019  | 0.008110318 | 0.549593337 |
| pcaac323.lysopcac161     | 0.034513676  | 0.057544414 | 0.549647186 |
| pcaec444.pcaec421        | -0.001167247 | 0.001946229 | 0.54966503  |
| c182.lysopcac170         | 0.007685558  | 0.01281507  | 0.549678033 |
| smc261.pcaec301          | 0.029528095  | 0.049243347 | 0.549739128 |
| c18.pcaac323             | -0.037992943 | 0.063366129 | 0.549777769 |
| pcaec380.pcaec362        | 0.008376152  | 0.013971259 | 0.549811482 |
| c141oh.pcaac384          | 0.030625002  | 0.051086999 | 0.549851208 |
| lysopcac182.pcaac404     | 0.004146694  | 0.006918382 | 0.549913823 |
| pcaec406.smohc141        | -0.009180123 | 0.015317533 | 0.549948487 |
| isoleucine.phenylalanine | 0.03930799   | 0.065598348 | 0.55001432  |
| c51dc.pcaac281           | 0.00114255   | 0.001906759 | 0.550022028 |
| c51dc.pcaec380           | -0.024280693 | 0.040522739 | 0.55003784  |
| c2.pcaec363              | -0.006155698 | 0.010275626 | 0.550123355 |
| lysopcac204.pcaec362     | -0.009890646 | 0.016510349 | 0.550123932 |
| smohc222.pcaec424        | -0.010552908 | 0.017617039 | 0.550150699 |
| pcaec322.pcaac422        | -0.013011776 | 0.021724209 | 0.550193459 |
| asparagine.tyrosine      | -0.019443704 | 0.032464871 | 0.550218498 |
| creatinine.c101          | -0.006162239 | 0.010289889 | 0.550252832 |
| methionine.lysopcac203   | 0.012468109  | 0.020820491 | 0.550269566 |
| pcaec362.c2              | 0.035292078  | 0.058943446 | 0.550331829 |
| pcaac360.smohc221        | -0.030759925 | 0.051386051 | 0.550425057 |
| smohc141.smc260          | -0.020655274 | 0.034507475 | 0.550445446 |
| pcaac281.pcaac426        | 0.021107358  | 0.035269726 | 0.550524261 |
| pcaec403.lysopcac203     | 0.006332185  | 0.010581946 | 0.55056435  |
| lysopcac160.c141oh       | 0.057173225  | 0.09556069  | 0.55063275  |
| pcaec360.pcaac366        | -0.005052149 | 0.008444502 | 0.550643153 |
| pcaac323.serine          | -0.011500971 | 0.019224125 | 0.550656102 |
| pcaac343.pcaac320        | -0.021433415 | 0.035827548 | 0.550668621 |
| c2.glutamine             | 0.013038961  | 0.021799216 | 0.550734723 |
| c162.c14                 | -0.016676986 | 0.027881689 | 0.550738053 |
| prolinr.pcaec406         | 0.001177929  | 0.001969615 | 0.55079374  |
| lysopcac204.pcaac386     | 0.013403909  | 0.02241311  | 0.550801413 |
| pcaac404.pcaec420        | -0.019120811 | 0.031976067 | 0.550845456 |
| pcaac322.isoleucine      | -0.010478982 | 0.017525748 | 0.550880947 |
| glutamine.pcaec362       | -0.005586588 | 0.009343752 | 0.550896669 |
| pcaac366.pcaec343        | 0.03925434   | 0.06565446  | 0.550898419 |
| c0.pcaac365              | -0.028398416 | 0.047497948 | 0.550902244 |
| lysopcac182.smc160       | -0.035954576 | 0.06015209  | 0.551008327 |
| c0.c8                    | 0.020919556  | 0.03500142  | 0.551041894 |
| pcaac402.c162            | 0.044543395  | 0.074531188 | 0.551061606 |
| pcaec381.pcaac366        | -0.009666944 | 0.016175308 | 0.551069485 |
| pcaac380.pcaac300        | -0.025890033 | 0.043336702 | 0.551215914 |
| pcaec383.c12             | 0.041890348  | 0.070122631 | 0.551235128 |
| smohc241.pcaac422        | -0.01071417  | 0.017937762 | 0.551295076 |

|                                  |              |             |             |
|----------------------------------|--------------|-------------|-------------|
| smc180.isoleucine                | 0.011274568  | 0.018878351 | 0.551344889 |
| alanine.pcaec406                 | 0.001672357  | 0.002800627 | 0.551401713 |
| pcaec383.pcaec364                | 0.002829428  | 0.004738444 | 0.551411743 |
| arginine.pcaac424                | -0.003122575 | 0.005229875 | 0.551449466 |
| c141oh.c5                        | -0.004009895 | 0.006716025 | 0.551450344 |
| pcaec446.pcaac363                | 0.004089495  | 0.006849616 | 0.551466051 |
| pcaec360.pcaec384                | -0.009269256 | 0.015526609 | 0.551498281 |
| smc160.asparticacid              | 0.011141216  | 0.018662833 | 0.551510397 |
| pcaac380.lysine                  | -0.055576021 | 0.09310201  | 0.551534765 |
| pcaac361.pcaac323                | -0.045151246 | 0.075639779 | 0.551542917 |
| pcaec401.smc160                  | -0.020763894 | 0.034786284 | 0.551560048 |
| pcaec404.pcaec384                | -0.021971313 | 0.036817432 | 0.551649936 |
| smc241.methionine                | 0.014413936  | 0.024155779 | 0.551687428 |
| pcaac365.pcaac424                | -0.006638007 | 0.011124436 | 0.551689134 |
| asparticacid.pcaec340            | -0.018369042 | 0.030788273 | 0.551742647 |
| asparagine.smohc161              | 0.006650394  | 0.011148296 | 0.551799643 |
| smc260.serine                    | -0.006518827 | 0.010928473 | 0.551826101 |
| pcaec343.pcaac426                | 0.037310375  | 0.062557025 | 0.55187769  |
| pcaec443.lysopcac281             | 0.006859056  | 0.011501736 | 0.551925765 |
| pcaec423.pcaec365                | -0.011618251 | 0.019484329 | 0.551967518 |
| pcaac422.pcaec342                | 0.043213252  | 0.072486759 | 0.552056242 |
| alphaaminoadipicacid.lysopcac160 | 0.00532462   | 0.008931787 | 0.552063527 |
| leucine.pcaac383                 | -0.004914941 | 0.008244749 | 0.552072178 |
| arginine.pcaac361                | -0.021314147 | 0.035754446 | 0.552074868 |
| pcaec422.pcaac422                | -0.015391069 | 0.025818788 | 0.55207941  |
| c101.smohc241                    | 0.028946337  | 0.04856486  | 0.552135598 |
| putrescine.pcaec406              | 0.002317473  | 0.003888344 | 0.552155099 |
| pcaec382.pcaac362                | -0.005953332 | 0.009991386 | 0.55226095  |
| pcaec421.pcaac366                | -0.009697575 | 0.016276204 | 0.552283171 |
| c14.pcaac425                     | 0.020239329  | 0.033972076 | 0.552316086 |
| pcaec380.tyrosine                | 0.034513153  | 0.057936556 | 0.552354515 |
| h1.histidine                     | 0.02007708   | 0.033704526 | 0.55237247  |
| smc161.pcaac386                  | -0.006547026 | 0.010992133 | 0.552418381 |
| pcaec342.pcaec360                | -0.003126884 | 0.005251009 | 0.552503433 |
| pcaac425.pcaec406                | 0.013419883  | 0.022541761 | 0.552602185 |
| c4.methionine                    | -0.014809166 | 0.024877967 | 0.552643436 |
| pcaac402.serotonin               | -0.054704612 | 0.09192436  | 0.552755232 |
| pcaec322.pcaec401                | 0.035602263  | 0.059829169 | 0.552781434 |
| c16.pcaac404                     | 0.003230884  | 0.005430838 | 0.552881994 |
| pcaec360.pcaec361                | -0.004776463 | 0.008029681 | 0.552924357 |
| lysopcac160.pcaac322             | -0.039601975 | 0.066575012 | 0.552926655 |
| c102.pcaec401                    | 0.030819289  | 0.051816729 | 0.552975016 |
| c101.pcaec402                    | 0.019380833  | 0.032587775 | 0.553006873 |
| lysopcac204.smc202               | -0.019358413 | 0.03255189  | 0.55302894  |
| alphaaminoadipicacid.pcaac424    | 0.003594316  | 0.006044427 | 0.553058579 |

|                                     |              |             |             |
|-------------------------------------|--------------|-------------|-------------|
| pcaec364.pcaac321                   | -0.013464016 | 0.022643075 | 0.553078532 |
| pcaec385.smc240                     | 0.012394744  | 0.020846176 | 0.553104138 |
| pcaac405.c4                         | -0.007591786 | 0.012769159 | 0.553131104 |
| pcaec404.smc240                     | 0.017444999  | 0.029346755 | 0.553195685 |
| pcaac365.alphaaminoadipicacid       | 0.00173874   | 0.002925146 | 0.553217337 |
| isoleucine.smc240                   | -0.013129836 | 0.022089877 | 0.553236663 |
| pcaec340.pcaec444                   | -0.065475503 | 0.110182942 | 0.553329265 |
| arginine.pcaec424                   | 0.00642925   | 0.010821117 | 0.553398858 |
| ornithine.lysopcac140               | 0.004550512  | 0.007659648 | 0.553432406 |
| arginine.pcaec423                   | 0.008503222  | 0.014315007 | 0.553486676 |
| c3.h1                               | -0.00073878  | 0.001243951 | 0.553559379 |
| smohc241.pcaec401                   | -0.012734437 | 0.021444281 | 0.55359947  |
| c2.c8                               | 0.025905625  | 0.043624045 | 0.553599575 |
| c14.pcaac240                        | -0.005776716 | 0.009730031 | 0.553692004 |
| c182.phenylalanine                  | -0.01735083  | 0.029226125 | 0.553708211 |
| c182.pcaec360                       | -0.003464163 | 0.005836928 | 0.553831373 |
| pcaec424.c4                         | -0.007267736 | 0.012246672 | 0.553861341 |
| pcaec342.pcaac405                   | -0.022861989 | 0.038536377 | 0.553987073 |
| glutamicacid.acetylornithoine       | -0.021313971 | 0.035928083 | 0.55399874  |
| pcaac281.pcaec301                   | -0.026010774 | 0.043851162 | 0.55405175  |
| c2.pcaec385                         | 0.029283484  | 0.049384195 | 0.554176951 |
| pcaec360.creatinine                 | 0.003906477  | 0.006588209 | 0.554192297 |
| c181.pcaec422                       | -0.011380337 | 0.019202503 | 0.554393279 |
| pcaec405.pcaac426                   | 0.045707923  | 0.077129837 | 0.554418986 |
| smc180.smc202                       | -0.029024909 | 0.048983276 | 0.554460906 |
| asparticacid.asparagine             | 0.003590439  | 0.006059805 | 0.554491984 |
| c101.pcaec421                       | -0.00121122  | 0.002044465 | 0.554533544 |
| pcaac323.isoleucine                 | -0.007539826 | 0.01272848  | 0.554586804 |
| pcaac364.pcaac420                   | 0.033042161  | 0.055783667 | 0.554608118 |
| pcaac386.pcaac361                   | -0.033792937 | 0.057051697 | 0.554611763 |
| glutamine.pcaac366                  | 0.008308847  | 0.014031146 | 0.554711714 |
| citruline.pcaec420                  | -0.008843353 | 0.014933995 | 0.554717739 |
| c14.pcaec382                        | -0.010824854 | 0.018282286 | 0.55476272  |
| phenylalanine.pcaac404              | 0.00325093   | 0.005490748 | 0.554776767 |
| pcaac360.pcaec382                   | -0.007815232 | 0.013201546 | 0.554830517 |
| pcaac422.smc261                     | 0.017925489  | 0.030280218 | 0.554835118 |
| pcaac366.pcaac424                   | -0.010545585 | 0.017814686 | 0.554852898 |
| prolinr.pcaec424                    | 0.008698768  | 0.014696374 | 0.554893783 |
| pcaac343.pcaac344                   | -0.036657256 | 0.061932191 | 0.554897469 |
| c10.pcaac405                        | -0.028746569 | 0.048572102 | 0.554937871 |
| ornithine.asymmetricdimethylarginin | -0.008049361 | 0.013601699 | 0.554965944 |
| pcaac422.h1                         | 0.001317669  | 0.002226603 | 0.55497024  |
| pcaec341.pcaac424                   | -0.014517868 | 0.024539675 | 0.555088084 |
| c181.pcaec385                       | -0.029396909 | 0.049692303 | 0.555107631 |
| pcaec383.pcaec385                   | -0.035834477 | 0.060580718 | 0.555149381 |

|                               |              |             |             |
|-------------------------------|--------------|-------------|-------------|
| c102.pcaac361                 | -0.021248465 | 0.03592486  | 0.555180464 |
| isoleucine.c14                | 0.015265249  | 0.025809815 | 0.555192724 |
| phenylalanine.smc202          | 0.025002938  | 0.042279822 | 0.555248303 |
| leucine.pcaec380              | 0.020686057  | 0.034981052 | 0.555260172 |
| lysine.pcaec424               | 0.004608433  | 0.007793077 | 0.555260672 |
| putrescine.pcaac384           | -0.046345135 | 0.078378444 | 0.555294129 |
| pcaac422.pcaac420             | 0.081769176  | 0.138292962 | 0.555310473 |
| c10.pcaac422                  | 0.009579362  | 0.016201706 | 0.555322958 |
| pcaec362.valine               | 0.025376033  | 0.042919925 | 0.555332994 |
| pcaac322.lysopcac182          | -0.006376278 | 0.010784586 | 0.555333901 |
| pcaec403.pcaac385             | -0.014198736 | 0.024015964 | 0.555346742 |
| pcaac421.c14                  | -0.024386538 | 0.041257162 | 0.555436642 |
| pcaac381.pcaac321             | 0.013147085  | 0.022246195 | 0.555506715 |
| pcaec363.c4                   | -0.009361201 | 0.015840854 | 0.555525592 |
| alphaaminoadipicacid.pcaec385 | -0.024576723 | 0.041603979 | 0.555674544 |
| serotonin.pcaec403            | -0.03793536  | 0.064219896 | 0.555687714 |
| pcaac341.smohc161             | -0.008130139 | 0.013763715 | 0.555698887 |
| pcaac321.c4                   | -0.010500784 | 0.017779537 | 0.555754367 |
| pcaec423.pcaac422             | -0.013119306 | 0.022215109 | 0.555789688 |
| pcaec343.smohc241             | -0.020394494 | 0.034535557 | 0.555804173 |
| acetylmethionine.pcaec380     | -0.025657279 | 0.043455811 | 0.555880265 |
| c5.pcaac240                   | -0.014003072 | 0.023717273 | 0.555884035 |
| c141oh.pcaac300               | -0.021933815 | 0.037155842 | 0.555949004 |
| c12.methionine                | 0.021656909  | 0.036689677 | 0.555980338 |
| c141oh.pcaec384               | -0.013478394 | 0.022838521 | 0.556055201 |
| pcaac321.glutamicacid         | -0.041763061 | 0.070774495 | 0.556104814 |
| pcaac383.lysopcac182          | -0.008212978 | 0.013918303 | 0.55610587  |
| pcaac421.pcaec382             | 0.010973372  | 0.018597207 | 0.556125853 |
| c51dc.pcaac362                | -0.006783413 | 0.011496332 | 0.556128962 |
| pcaac403.pcaec403             | 0.049303251  | 0.083566327 | 0.556169572 |
| lysopcac181.asparagine        | -0.002793585 | 0.004735579 | 0.556219921 |
| lysopcac203.c3                | -0.022945123 | 0.038895731 | 0.556220238 |
| c181.pcaac363                 | 0.004366341  | 0.007401912 | 0.556233558 |
| pcaec301.pcaac362             | -0.002514849 | 0.004263328 | 0.556243232 |
| pcaac385.pcaac422             | -0.013973006 | 0.023699038 | 0.556428455 |
| asparagine.pcaec402           | -0.015741179 | 0.026698624 | 0.556438218 |
| c51.lysopcac281               | 0.008205771  | 0.01391822  | 0.556449731 |
| pcaac361.pcaec405             | -0.026818904 | 0.045491351 | 0.556471056 |
| pcaec446.pcaac343             | 0.012245468  | 0.020774689 | 0.556535799 |
| pcaac424.pcaec445             | 0.034515407  | 0.058569234 | 0.556624196 |
| lysine.c162                   | -0.042824993 | 0.072673421 | 0.556643948 |
| pcaac344.smc161               | -0.023617523 | 0.040084987 | 0.556706637 |
| c102.pcaec342                 | 0.033403354  | 0.056697829 | 0.556732911 |
| pcaec362.pcaac361             | 0.015554893  | 0.026404402 | 0.556762804 |
| pcaec380.pcaec445             | 0.02977566   | 0.050544156 | 0.556763034 |

|                              |              |             |             |
|------------------------------|--------------|-------------|-------------|
| pcaac343.c182                | 0.01778213   | 0.030185744 | 0.556770804 |
| smc202.c8                    | 0.020082671  | 0.034091156 | 0.556772743 |
| pcaac403.pcaac364            | 0.034404976  | 0.058406572 | 0.556791077 |
| pcaec401.taurine             | 0.029006907  | 0.049245995 | 0.556817425 |
| c8.kynurenine                | 0.004475703  | 0.007599596 | 0.556871673 |
| pcaec403.c4                  | -0.012839455 | 0.021803924 | 0.556924974 |
| pcaac402.c2                  | -0.062148374 | 0.105549428 | 0.556959488 |
| methioninesulfoxide.pcaac384 | 0.02730868   | 0.046385363 | 0.557008577 |
| c51.ornithine                | 0.01089783   | 0.018512975 | 0.557059301 |
| pcaac422.pcaec405            | -0.05183674  | 0.088070042 | 0.557108586 |
| pcaac300.smc181              | 0.008573356  | 0.014566648 | 0.557125114 |
| pcaac406.putrescine          | 0.013021239  | 0.022128109 | 0.557200592 |
| pcaec380.pcaac424            | -0.011038001 | 0.018759721 | 0.557240411 |
| smc260.pcaac364              | 0.016965304  | 0.028833731 | 0.55724338  |
| pcaec421.leucine             | -0.038557174 | 0.065532205 | 0.557252799 |
| c18.pcaac425                 | 0.029133412  | 0.049520951 | 0.557296354 |
| pcaec341.valine              | 0.028820768  | 0.048990691 | 0.557305765 |
| c162.glutamine               | -0.016292012 | 0.027700061 | 0.55739459  |
| phenylalanine.lysopcac140    | -0.0007099   | 0.001207034 | 0.557409176 |
| pcaac361.lysopcac203         | -0.038277401 | 0.065087242 | 0.557437558 |
| lysopcac140.c182             | 0.020933749  | 0.035599717 | 0.557479344 |
| c16.methioninesulfoxide      | 0.011849871  | 0.020151799 | 0.557479953 |
| ornithine.smohc222           | -0.002279971 | 0.00387772  | 0.557522451 |
| arginine.prolinr             | 0.024110451  | 0.041009354 | 0.557550082 |
| c16.smc260                   | 0.01372973   | 0.023353989 | 0.557569531 |
| pcaec401.lysopcac204         | -0.018351359 | 0.031215907 | 0.557577391 |
| pcaec445.pcaec424            | -0.011772197 | 0.020024762 | 0.557579299 |
| pcaac323.lysopcac182         | -0.007501981 | 0.012762396 | 0.557621318 |
| lysopcac170.pcaac321         | -0.013677679 | 0.023271038 | 0.557664033 |
| pcaac321.lysopcac140         | 0.000733233  | 0.001247573 | 0.557682814 |
| c182.c4                      | 0.007450722  | 0.012678047 | 0.557709908 |
| pcaac385.pcaec422            | 0.010423034  | 0.017738855 | 0.557780021 |
| smohc141.pcaec384            | -0.044797516 | 0.076240861 | 0.557782236 |
| smohc161.methioninesulfoxide | 0.005824397  | 0.009912935 | 0.557798056 |
| ornithine.pcaac341           | 0.001495211  | 0.002545076 | 0.55784055  |
| pcaec386.pcaac363            | 0.004490063  | 0.007642882 | 0.557846394 |
| c4.lysopcac140               | 0.001663451  | 0.002831512 | 0.557849809 |
| c0.pcaac366                  | 0.024578531  | 0.041845455 | 0.557925786 |
| ornithine.pcaac404           | -0.003631021 | 0.006181899 | 0.557926498 |
| serine.pcaec382              | 0.005785687  | 0.009850358 | 0.557930024 |
| glutamicacid.pcaac403        | 0.003782692  | 0.006440201 | 0.557931302 |
| pcaec444.smc260              | -0.020912084 | 0.03560809  | 0.557979201 |
| pcaac281.pcaac322            | 0.030907204  | 0.052628444 | 0.557987758 |
| pcaac321.pcaac300            | -0.053927132 | 0.091828656 | 0.557996903 |
| c3.pcaec403                  | 0.02821196   | 0.048044661 | 0.558033999 |

|                              |              |             |             |
|------------------------------|--------------|-------------|-------------|
| pcaec342.serine              | -0.009500047 | 0.016180839 | 0.5580914   |
| glutamine.pcaac422           | -0.005952714 | 0.010140281 | 0.558145392 |
| pcaec341.putrescine          | 0.014149675  | 0.024107254 | 0.558205447 |
| histidine.tyrosine           | -0.033424266 | 0.056946882 | 0.5582116   |
| pcaac386.pcaac426            | -0.030838715 | 0.052545282 | 0.558238189 |
| putrescine.smc241            | 0.004429119  | 0.00754761  | 0.558287664 |
| pcaac320.lysopcac160         | -0.012301872 | 0.020965359 | 0.558322937 |
| c3.creatinine                | 0.007020806  | 0.011965494 | 0.558334318 |
| c2.pcaac362                  | 0.003696787  | 0.006301143 | 0.558380678 |
| c10.arginine                 | -0.00733531  | 0.01250354  | 0.558398428 |
| smohc221.prolinr             | 0.018766393  | 0.031989407 | 0.558408262 |
| pcaec340.serine              | -0.015748149 | 0.026849222 | 0.558477745 |
| pcaec322.pcaec383            | -0.035505357 | 0.060539989 | 0.558519605 |
| c3.pcaec421                  | 0.000444483  | 0.000757927 | 0.558541217 |
| pcaac363.pcaac426            | -0.031433414 | 0.053604401 | 0.558574278 |
| pcaec362.pcaec425            | -0.001748226 | 0.002981866 | 0.558647987 |
| pcaec380.smc241              | 0.007753978  | 0.01322713  | 0.558693837 |
| pcaac240.threonine           | -0.011248579 | 0.019189495 | 0.558716245 |
| c12.c14                      | 0.027833084  | 0.047490308 | 0.558786595 |
| lysopcac280.pcaec421         | 0.002543965  | 0.004341035 | 0.558821359 |
| smohc141.pcaec385            | -0.027518338 | 0.046962021 | 0.558859762 |
| c141.serotonin               | 0.018851489  | 0.032178716 | 0.558948775 |
| methioninesulfoxide.pcaac322 | 0.021556772  | 0.036802063 | 0.559007896 |
| c5.c12                       | -0.021297202 | 0.036362225 | 0.559043551 |
| lysopcac161.smc202           | 0.025301298  | 0.043209852 | 0.55914486  |
| pcaac425.pcaac426            | 0.051978121  | 0.088773306 | 0.559164595 |
| c141oh.pcaac362              | 0.002178047  | 0.003720026 | 0.559179812 |
| pcaec321.pcaec422            | -0.019940001 | 0.034065892 | 0.559284564 |
| pcaac426.phenylalanine       | 0.01556582   | 0.026595249 | 0.559318391 |
| pcaec424.pcaec405            | -0.057825391 | 0.098806393 | 0.559349499 |
| pcaec380.kynurenine          | -0.005363568 | 0.009165461 | 0.559380273 |
| pcaac344.c18                 | -0.022263036 | 0.038045455 | 0.559396408 |
| glutamicacid.pcaac361        | -0.027111922 | 0.046334431 | 0.5594191   |
| pcaec403.pcaac362            | -0.004342105 | 0.007421024 | 0.559437175 |
| pcaec421.pcaec343            | 0.042998479  | 0.07349426  | 0.559470409 |
| pcaec420.smc241              | 0.009520642  | 0.016273163 | 0.559475311 |
| lysopcac203.pcaac420         | 0.045722792  | 0.078157475 | 0.559504233 |
| pcaec384.pcaec360            | 0.003038338  | 0.005194356 | 0.559556546 |
| smc241.pcaac360              | -0.021371934 | 0.036543751 | 0.559623006 |
| c141.kynurenine              | -0.002551605 | 0.004363508 | 0.559670976 |
| c5.lysopcac181               | -0.038512229 | 0.065875118 | 0.559761558 |
| pcaac384.lysopcac203         | -0.005323307 | 0.009105521 | 0.559762062 |
| pcaac361.pcaac360            | -0.022502885 | 0.038496967 | 0.559820733 |
| pcaac361.c182                | 0.012901615  | 0.022072217 | 0.559832982 |
| pcaec444.alanine             | -0.005799642 | 0.009922116 | 0.559834097 |



|                         |              |             |             |
|-------------------------|--------------|-------------|-------------|
| pcaec423.lysopcac281    | 0.004134287  | 0.007074007 | 0.55988982  |
| leucine.lysopcac161     | -0.043529262 | 0.074493569 | 0.559955372 |
| lysopcac161.pcaec342    | 0.050017243  | 0.085609382 | 0.560013249 |
| pcaac384.pcaec402       | -0.013146362 | 0.022505861 | 0.560093023 |
| pcaac404.pcaec385       | 0.032274164  | 0.055254117 | 0.560110724 |
| lysopcac160.pcaac402    | -0.034415727 | 0.058936249 | 0.560215281 |
| c12.pcaac362            | 0.008828636  | 0.015119951 | 0.560243435 |
| pcaac380.h1             | -0.001832121 | 0.003137858 | 0.560263665 |
| c18.lysopcac180         | 0.033503142  | 0.057387659 | 0.560312177 |
| prolinr.pcaac321        | -0.013616087 | 0.023323632 | 0.560321994 |
| putrescine.pcaec365     | -0.009805305 | 0.016796643 | 0.560337795 |
| pcaac406.pcaec402       | 0.016642675  | 0.028510867 | 0.560361116 |
| pcaec361.isoleucine     | -0.009758295 | 0.016717883 | 0.56037924  |
| pcaec424.smc161         | -0.034092173 | 0.058430348 | 0.560538355 |
| smc241.pcaec403         | -0.011306483 | 0.019382594 | 0.560629033 |
| pcaec342.glutamicacid   | 0.014877867  | 0.025505239 | 0.560632972 |
| pcaec424.pcaac342       | 0.015814954  | 0.027117292 | 0.560713775 |
| pcaec424.taurine        | -0.02970364  | 0.050934492 | 0.560735346 |
| c3.smc160               | -0.040793053 | 0.069953992 | 0.560756963 |
| c8.smc161               | -0.029004737 | 0.049740365 | 0.560769347 |
| c14.glutamine           | -0.006551159 | 0.011235222 | 0.560790486 |
| pcaec385.pcaec383       | 0.030430729  | 0.052192983 | 0.560823173 |
| glycine.c12             | 0.021818581  | 0.037422409 | 0.560828118 |
| pcaec343.pcaec446       | -0.015027069 | 0.025779229 | 0.560909562 |
| pcaec300.serine         | -0.005491687 | 0.009421836 | 0.560940331 |
| h1.smc261               | 0.015536588  | 0.026658279 | 0.560982389 |
| pcaec364.smc181         | 0.011586636  | 0.019881514 | 0.560996478 |
| pcaec404.pcaac321       | 0.005418664  | 0.009297899 | 0.560996878 |
| pcaac422.pcaec404       | 0.013509339  | 0.023185028 | 0.561069833 |
| pcaec322.pcaec446       | -0.019212538 | 0.03297383  | 0.561079853 |
| phenylalanine.valine    | 0.043585165  | 0.074806452 | 0.561094002 |
| pcaec361.c12            | 0.027108325  | 0.046538806 | 0.561195046 |
| pcaac422.pcaac320       | -0.025088574 | 0.043071843 | 0.561199477 |
| pcaac422.pcaac366       | -0.012344609 | 0.021193178 | 0.561200627 |
| lysopcac203.smc180      | 0.003649684  | 0.006266502 | 0.56124673  |
| lysopcac181.pcaac386    | 0.014839202  | 0.025481308 | 0.561283841 |
| c16.threonine           | 0.014099173  | 0.024210968 | 0.561290481 |
| smc261.pcaec406         | 0.003406779  | 0.005850286 | 0.561303665 |
| lysopcac204.lysopcac280 | 0.00394984   | 0.006783171 | 0.561321775 |
| c101.c3                 | 0.020461281  | 0.035153832 | 0.561489737 |
| pcaec361.pcaac381       | 0.02035479   | 0.0349786   | 0.561576087 |
| pcaec424.pcaac360       | -0.02061491  | 0.035426553 | 0.56158658  |
| alanine.creatinine      | -0.002286902 | 0.003930241 | 0.561608407 |
| c102.alanine            | -0.012493464 | 0.021471428 | 0.561614119 |
| c12.pcaac344            | -0.024532347 | 0.042166259 | 0.561657239 |

|                              |              |             |             |
|------------------------------|--------------|-------------|-------------|
| pcaec443.pcaac364            | 0.024108848  | 0.04144552  | 0.561724871 |
| smohc161.putrescine          | 0.014429069  | 0.024805048 | 0.561725432 |
| pcaac366.c101                | -0.004701594 | 0.00808375  | 0.561784815 |
| c142.smohc161                | 0.002648466  | 0.004553691 | 0.561786151 |
| pcaac424.pcaec342            | 0.043831526  | 0.075365517 | 0.561801321 |
| pcaac366.pcaec301            | 0.054211734  | 0.093222787 | 0.561839725 |
| pcaec404.transhydroxyproline | -0.043260594 | 0.0743967   | 0.561868882 |
| pcaec343.isoleucine          | 0.009381049  | 0.016134145 | 0.561898862 |
| pcaac366.c51dc               | -0.064648743 | 0.111188069 | 0.561902083 |
| pcaec406.smc160              | -0.029311864 | 0.050413717 | 0.561908536 |
| pcaec446.taurine             | -0.016695142 | 0.028716234 | 0.561937406 |
| pcaac240.pcaec401            | 0.015499113  | 0.026661956 | 0.561980392 |
| smc261.methionine            | 0.010063103  | 0.017310821 | 0.561980907 |
| pcaac341.pcaec301            | -0.034672163 | 0.059651537 | 0.562030346 |
| smc160.lysopcac203           | -0.005853389 | 0.010070765 | 0.562043252 |
| c2.kynurenine                | -0.006623215 | 0.011398313 | 0.562148186 |
| pcaec422.lysopcac203         | -0.026162785 | 0.045030531 | 0.562194344 |
| pcaec422.lysopcac182         | -0.023984468 | 0.041285825 | 0.562237311 |
| pcaac380.pcaec363            | -0.01836986  | 0.031623693 | 0.562269552 |
| lysopcac281.c101             | -0.004803042 | 0.008268737 | 0.562283933 |
| lysopcac161.pcaec321         | -0.022102244 | 0.038063216 | 0.562415493 |
| pcaec301.pcaac366            | -0.004168211 | 0.007179094 | 0.562461162 |
| pcaec385.pcaac300            | -0.021941493 | 0.037791594 | 0.562469345 |
| lysine.pcaac405              | 0.030391891  | 0.052355073 | 0.56253406  |
| smohc161.pcaac403            | -0.002633525 | 0.004536688 | 0.56253452  |
| pcaec361.pcaec385            | -0.027451066 | 0.047299775 | 0.562622838 |
| pcaec385.c12                 | 0.023242437  | 0.040050784 | 0.562649342 |
| smc260.c51                   | -0.017559203 | 0.03025951  | 0.562674263 |
| c182.pcaac420                | -0.044923292 | 0.077416454 | 0.562678392 |
| pcaec420.pcaac364            | -0.024513967 | 0.042245576 | 0.562683726 |
| spermidine.lysopcac203       | 0.048707036  | 0.083953894 | 0.562756939 |
| pcaec425.pcaac380            | 0.038465755  | 0.066325198 | 0.562896283 |
| pcaec342.pcaac386            | 0.008278795  | 0.01427607  | 0.562929746 |
| pcaac300.methionine          | -0.018117515 | 0.031247742 | 0.563000192 |
| acetylmithoine.lysopcac281   | -0.009490485 | 0.016369426 | 0.563022651 |
| pcaac424.pcaac322            | 0.027437413  | 0.047326757 | 0.563039315 |
| pcaec425.lysopcac170         | -0.003729346 | 0.006433048 | 0.563057751 |
| pcaac386.pcaac240            | -0.008670861 | 0.014960651 | 0.56315124  |
| smohc241.pcaec406            | 0.002793007  | 0.004819803 | 0.563213124 |
| pcaac365.pcaec363            | 0.014672493  | 0.02532845  | 0.563345479 |
| lysopcac204.pcaac300         | -0.023190023 | 0.040033535 | 0.563361692 |
| pcaec360.lysine              | -0.051414136 | 0.088769521 | 0.563414239 |
| pcaec422.pcaec342            | -0.050389054 | 0.087032546 | 0.563561499 |
| pcaec363.valine              | 0.023260556  | 0.040176104 | 0.563563524 |
| pcaec425.smohc141            | -0.008412674 | 0.014534737 | 0.563675981 |

|                               |              |             |             |
|-------------------------------|--------------|-------------|-------------|
| c5.pcaec401                   | 0.036624441  | 0.063282323 | 0.563710316 |
| pcaac405.pcaec382             | 0.002095893  | 0.0036216   | 0.563728173 |
| lysopcac182.pcaac422          | -0.00662718  | 0.011452702 | 0.563771119 |
| c10.pcaac323                  | 0.056285594  | 0.097274168 | 0.563789995 |
| isoleucine.pcaec421           | 0.000531703  | 0.000918994 | 0.56382831  |
| lysopcac161.pcaac343          | 0.016876128  | 0.029169555 | 0.563840868 |
| glycine.alanine               | -0.006049542 | 0.010456445 | 0.563844909 |
| c16.pcaec406                  | -0.003871052 | 0.006691178 | 0.563855714 |
| histidine.serine              | -0.008805083 | 0.015220346 | 0.5638714   |
| c10.pcaac344                  | -0.024925863 | 0.043091646 | 0.563917848 |
| pcaac364.pcaec385             | 0.026424546  | 0.04568598  | 0.563947005 |
| c4.asparagine                 | -0.005029061 | 0.008695237 | 0.563964161 |
| smc202.c12                    | 0.019084451  | 0.033001798 | 0.564020969 |
| pcaac300.smc161               | -0.024511613 | 0.042397773 | 0.564122443 |
| ornithine.pcaec383            | -0.028193252 | 0.048771061 | 0.56416357  |
| pcaec384.smc180               | 0.006778377  | 0.011726638 | 0.564191143 |
| alanine.pcaac240              | -0.00611222  | 0.010575508 | 0.564239913 |
| lysopcac160.putrescine        | 0.020875446  | 0.036121502 | 0.564264826 |
| asparticacid.pcaac300         | -0.024669468 | 0.042689888 | 0.564296355 |
| c8.transhydroxyproline        | 0.017955073  | 0.031076036 | 0.564361926 |
| lysopcac180.pcaac362          | -0.015406342 | 0.026665123 | 0.564366968 |
| glutamicacid.pcaec421         | 0.00585589   | 0.010136706 | 0.564420594 |
| pcaec386.smc202               | -0.017734989 | 0.030701261 | 0.564439728 |
| pcaec341.serine               | -0.007965386 | 0.013789191 | 0.5644457   |
| pcaec383.pcaac424             | 0.013620459  | 0.023579258 | 0.56445146  |
| smohc222.c4                   | -0.011646276 | 0.020162189 | 0.564462392 |
| pcaec386.lysopcac281          | 0.006862758  | 0.01188137  | 0.564477841 |
| pcaec364.pcaec363             | -0.024812613 | 0.042961169 | 0.564509847 |
| c51dc.h1                      | -0.002809902 | 0.004865831 | 0.564565644 |
| pcaec361.asparagine           | 0.00448493   | 0.007769893 | 0.564738891 |
| pcaec384.pcaec406             | 0.005914368  | 0.010246814 | 0.564757788 |
| pcaac386.lysopcac170          | 0.005597594  | 0.00969854  | 0.564779703 |
| acetylorithoine.pcaac361      | 0.011127427  | 0.019281231 | 0.564811047 |
| pcaac281.c0                   | -0.000237967 | 0.000412354 | 0.564823969 |
| pcaec386.lysopcac161          | -0.044141681 | 0.076539466 | 0.565076416 |
| prolinr.serotonin             | 0.017526351  | 0.030390862 | 0.565089785 |
| pcaec341.alphaaminoadipicacid | 0.002053973  | 0.003561935 | 0.565125328 |
| c16.pcaec403                  | 0.014369755  | 0.024920792 | 0.565144328 |
| pcaec361.smc202               | 0.027303157  | 0.047352052 | 0.565156378 |
| smc202.histidine              | 0.02693886   | 0.046728333 | 0.565223578 |
| pcaac422.pcaac401             | -0.025190089 | 0.043699617 | 0.565265503 |
| pcaec343.pcaac321             | -0.014557309 | 0.025255463 | 0.56528902  |
| c16.smc181                    | 0.016767837  | 0.029096772 | 0.565372668 |
| smc202.pcaac406               | 0.012837442  | 0.022276486 | 0.565373062 |
| smc261.putrescine             | 0.021920018  | 0.03804168  | 0.565418292 |

|                                    |              |             |             |
|------------------------------------|--------------|-------------|-------------|
| lysopcac180.pcaec383               | -0.057007567 | 0.098941109 | 0.565441067 |
| pcaac425.pcaac321                  | 0.007760188  | 0.013472517 | 0.56555928  |
| pcaec364.smc202                    | -0.024088389 | 0.041820217 | 0.565561093 |
| pcaac341.glutamicacid              | -0.018887553 | 0.032798852 | 0.565654426 |
| c18.pcaec401                       | -0.017751077 | 0.030830316 | 0.565717284 |
| citruiline.tryptophan              | 0.002320457  | 0.004030988 | 0.565792996 |
| c5.tryptophan                      | 0.005399268  | 0.009381404 | 0.565877838 |
| pcaec444.lysopcac204               | -0.007586017 | 0.013182673 | 0.565928531 |
| pcaac422.pcaac424                  | -0.004831774 | 0.008396546 | 0.56593247  |
| pcaec425.asymmetricdimethylarginir | 0.010130592  | 0.017605026 | 0.565939401 |
| c102.glutamine                     | -0.015614241 | 0.027140513 | 0.566024536 |
| pcaec343.acetylmithoine            | -0.042545084 | 0.073966801 | 0.566105181 |
| pcaec406.transhydroxyproline       | -0.03331875  | 0.057929134 | 0.566123827 |
| pcaec300.c4                        | -0.004607845 | 0.008014502 | 0.566275883 |
| isoleucine.pcaac320                | -0.058618039 | 0.101957694 | 0.566284903 |
| lysopcac180.asparagine             | -0.004433822 | 0.007713047 | 0.566337584 |
| pcaec405.pcaec445                  | 0.031478231  | 0.054764101 | 0.566371434 |
| alanine.pcaac403                   | 0.004901613  | 0.00852772  | 0.566378823 |
| lysopcac161.c12                    | 0.034821335  | 0.060584608 | 0.566399324 |
| pcaec423.glutamicacid              | 0.028324151  | 0.049280409 | 0.566399783 |
| c102.pcaec406                      | -0.002761388 | 0.004804821 | 0.566428643 |
| arginine.pcaac403                  | 0.003132621  | 0.005451534 | 0.566483151 |
| pcaec421.smc202                    | -0.039188437 | 0.068199865 | 0.566496329 |
| putrescine.pcaec361                | 0.005301448  | 0.009226562 | 0.566514034 |
| c4.lysopcac281                     | -0.009906707 | 0.01724318  | 0.566552098 |
| c162.pcaec384                      | 0.010410619  | 0.018121123 | 0.566570379 |
| pcaec340.alphaaminoadipicacid      | 0.013516453  | 0.023528576 | 0.566592118 |
| c18.pcaec363                       | 0.008041392  | 0.013999324 | 0.566630402 |
| smc260.pcaac384                    | -0.046472846 | 0.080925349 | 0.566728099 |
| c162.asparticacid                  | 0.009115866  | 0.015874225 | 0.566736378 |
| smohc161.pcaec383                  | 0.029563037  | 0.051482058 | 0.566747324 |
| pcaec405.c51                       | -0.044773462 | 0.077978862 | 0.566791351 |
| pcaac383.pcaec382                  | 0.002763555  | 0.004813156 | 0.566796277 |
| pcaac421.pcaec421                  | -0.001837822 | 0.003201126 | 0.566829736 |
| smohc222.pcaac406                  | 0.014547758  | 0.025346446 | 0.566938338 |
| pcaac341.pcaac380                  | -0.026154487 | 0.045574039 | 0.566983194 |
| lysopcac280.lysopcac170            | 0.020031578  | 0.034910034 | 0.567040084 |
| alphaaminoadipicacid.h1            | 0.00402395   | 0.00701295  | 0.567051694 |
| smohc221.glutamine                 | -0.009786918 | 0.017065935 | 0.567262091 |
| pcaac425.smohc241                  | -0.027072384 | 0.047208895 | 0.567273841 |
| smc160.pcaac323                    | -0.040478469 | 0.07058992  | 0.567292811 |
| pcaac421.creatinine                | -0.012658342 | 0.022077448 | 0.567340439 |
| c141.pcaac426                      | -0.022632485 | 0.039473982 | 0.56734636  |
| lysopcac160.c5                     | -0.006484531 | 0.011311111 | 0.567389116 |
| pcaec322.c16                       | 0.01892204   | 0.033007977 | 0.567410739 |

|                               |              |             |             |
|-------------------------------|--------------|-------------|-------------|
| lysopcac181.pcaac321          | -0.013130581 | 0.022906348 | 0.567429422 |
| c14.lysopcac182               | -0.013981411 | 0.024391206 | 0.567438671 |
| pcaac385.serine               | -0.013292927 | 0.023190237 | 0.567440706 |
| c141.pcaac421                 | 0.008965514  | 0.015641811 | 0.567465017 |
| pcaec444.pcaec340             | -0.015749475 | 0.027477674 | 0.56746683  |
| pcaec445.pcaac426             | -0.035695122 | 0.062294461 | 0.567579679 |
| pcaac323.asparticacid         | 0.018449118  | 0.032199001 | 0.567603045 |
| lysopcac280.pcaac422          | -0.013045603 | 0.022769951 | 0.567630799 |
| lysopcac181.putrescine        | 0.030665617  | 0.053555346 | 0.567856266 |
| pcaac422.pcaec445             | -0.055911576 | 0.097651503 | 0.567879488 |
| kynurenine.asparagine         | -0.00629711  | 0.011001092 | 0.567983938 |
| pcaac240.glutamine            | -0.006134306 | 0.010717935 | 0.568029449 |
| pcaec403.pcaac322             | 0.030195626  | 0.052770787 | 0.568121911 |
| c101.smc240                   | -0.017468902 | 0.030529573 | 0.568126902 |
| c18.prolinr                   | 0.016870245  | 0.029486579 | 0.568169502 |
| histidine.pcaac422            | -0.009113532 | 0.015931084 | 0.568218981 |
| arginine.asparagine           | -0.004279788 | 0.007481651 | 0.568233685 |
| pcaec445.alphaaminoadipicacid | 0.002226043  | 0.003891778 | 0.568268702 |
| pcaac360.smc181               | 0.004412297  | 0.00771422  | 0.568280063 |
| lysine.smc180                 | 0.004570455  | 0.007991324 | 0.568308628 |
| lysopcac181.c16               | -0.03053858  | 0.053399332 | 0.568333204 |
| pcaac404.pcaec363             | -0.021861737 | 0.03823363  | 0.568398928 |
| pcaec423.tryptophan           | -0.008105602 | 0.014175877 | 0.568402293 |
| smohc222.pcaac426             | -0.019331319 | 0.033808648 | 0.568403769 |
| c4.pcaec362                   | -0.006642658 | 0.011617383 | 0.568403876 |
| pcaec300.c18                  | 0.015091547  | 0.026400738 | 0.568506935 |
| isoleucine.pcaac361           | -0.023267462 | 0.040709272 | 0.568562094 |
| c101.pcaec385                 | -0.013032347 | 0.022803399 | 0.568591105 |
| pcaac343.glutamicacid         | 0.034749159  | 0.060809143 | 0.568633472 |
| c16.pcaac366                  | -0.007389144 | 0.012931968 | 0.568674281 |
| c142.transhydroxyproline      | 0.010000901  | 0.017504115 | 0.568701441 |
| pcaac341.c102                 | 0.019781018  | 0.034623239 | 0.568717482 |
| lysine.smc241                 | 0.003754664  | 0.006572888 | 0.568776199 |
| pcaac361.pcaac422             | -0.008414713 | 0.014731504 | 0.568796354 |
| smohc222.c101                 | -0.003806715 | 0.006665329 | 0.568852804 |
| c141oh.alanine                | 0.036337438  | 0.063625861 | 0.568859981 |
| c4.smohc241                   | 0.015326434  | 0.026844313 | 0.568977131 |
| pcaac422.c51                  | -0.062552329 | 0.109586271 | 0.569067303 |
| pcaec406.c102                 | 0.015872085  | 0.027806727 | 0.569070175 |
| pcaac386.pcaec362             | -0.007758247 | 0.013592821 | 0.569096903 |
| serine.methioninesulfoxide    | 0.00733907   | 0.012859098 | 0.569117754 |
| citruiline.pcaac366           | -0.036610574 | 0.064147184 | 0.569119191 |
| pcaac401.pcaec301             | 0.041307049  | 0.072385449 | 0.569168975 |
| smc202.pcaac385               | 0.012017283  | 0.02105995  | 0.569190246 |
| pcaec405.c12                  | 0.029140265  | 0.051074796 | 0.569245408 |

|                               |              |             |             |
|-------------------------------|--------------|-------------|-------------|
| c181.pcaac366                 | 0.006547092  | 0.011476854 | 0.569299814 |
| pcaac426.pcaec386             | 0.005950986  | 0.010432559 | 0.569324214 |
| pcaac425.transhydroxyproline  | 0.013884049  | 0.024349497 | 0.569476949 |
| smohc221.pcaec405             | -0.022508123 | 0.039475369 | 0.569488542 |
| pcaac322.h1                   | 0.001333953  | 0.002339641 | 0.569507791 |
| phenylalanine.threonine       | 0.008868776  | 0.015555543 | 0.569519236 |
| pcaec361.pcaec342             | 0.060827335  | 0.106701661 | 0.569564419 |
| pcaec384.pcaac322             | 0.028475592  | 0.049954789 | 0.569592809 |
| smohc221.lysine               | 0.020153252  | 0.035372015 | 0.569779458 |
| smc240.smohc241               | -0.024509247 | 0.043020836 | 0.56980982  |
| pcaec381.arginine             | -0.04128231  | 0.072488732 | 0.569949678 |
| lysopcac181.c182              | 0.026541017  | 0.046605922 | 0.569964791 |
| lysopcac160.pcaec425          | 0.002241321  | 0.003936673 | 0.570055068 |
| pcaac385.smohc241             | 0.02561791   | 0.045004849 | 0.570135158 |
| pcaac281.lysopcac161          | 0.03447559   | 0.060577452 | 0.570209366 |
| pcaec362.pcaac365             | 0.022883822  | 0.040210608 | 0.5702207   |
| pcaac405.pcaec386             | 0.004875335  | 0.008566783 | 0.570221836 |
| lysopcac170.pcaec446          | 0.019982991  | 0.035113887 | 0.570226326 |
| c4.pcaac362                   | 0.006630179  | 0.011650794 | 0.57023681  |
| c5.histidine                  | 0.046327265  | 0.08141858  | 0.570287011 |
| lysopcac280.pcaac366          | -0.003534607 | 0.006213122 | 0.570359661 |
| lysopcac204.c162              | -0.035744061 | 0.062837129 | 0.570398339 |
| alphaaminoadipicacid.pcaac422 | 0.009280671  | 0.016318612 | 0.570479355 |
| smc241.pcaac422               | -0.01359446  | 0.023910731 | 0.570591967 |
| pcaac403.pcaac322             | 0.042462647  | 0.074688731 | 0.57060714  |
| lysopcac180.c4                | -0.011678091 | 0.020541961 | 0.570626643 |
| pcaac380.lysopcac280          | 0.003223152  | 0.005670168 | 0.570666632 |
| pcaec360.pcaac424             | -0.005041854 | 0.008869779 | 0.570673165 |
| pcaec404.c4                   | -0.012255027 | 0.021560745 | 0.570697041 |
| pcaec365.smc240               | 0.012627169  | 0.02221565  | 0.570700169 |
| pcaec421.smc241               | 0.007058229  | 0.012418332 | 0.570713015 |
| pcaec360.lysopcac160          | -0.01345377  | 0.023671026 | 0.570717942 |
| pcaec300.pcaec425             | -0.003730699 | 0.006564021 | 0.570723816 |
| pcaec422.prolinr              | -0.013613504 | 0.023960826 | 0.570858609 |
| c12.smohc141                  | 0.019774441  | 0.034804743 | 0.570860683 |
| pcaec383.smc161               | 0.042208021  | 0.074290691 | 0.570865284 |
| prolinr.pcaec380              | 0.020300328  | 0.035730793 | 0.570865453 |
| smc180.pcaec405               | -0.013624286 | 0.02398038  | 0.570867862 |
| pcaac320.lysopcac182          | -0.009445087 | 0.016625988 | 0.57090254  |
| pcaec420.ornithine            | -0.012374235 | 0.021784956 | 0.570952893 |
| pcaec382.tyrosine             | -0.028615377 | 0.050380678 | 0.570976103 |
| pcaac321.pcaec402             | 0.016986241  | 0.029908327 | 0.571002945 |
| pcaec443.smohc241             | -0.028545607 | 0.050265519 | 0.571034859 |
| h1.pcaac343                   | -0.020213488 | 0.035595014 | 0.571049937 |
| c3.pcaac362                   | 0.00931772   | 0.016408113 | 0.571050875 |

|                                    |              |             |             |
|------------------------------------|--------------|-------------|-------------|
| pcaac383.taurine                   | 0.014908439  | 0.026254637 | 0.571072904 |
| pcaac403.lysopcac280               | 0.005734534  | 0.010099218 | 0.571086847 |
| lysopcac182.alphaaminoadipicacid   | -0.004238818 | 0.007466195 | 0.571144349 |
| c8.pcaec422                        | 0.016961843  | 0.029878775 | 0.571175524 |
| smc261.pcaac360                    | -0.018907461 | 0.033308318 | 0.571201828 |
| citruiline.acetylorithoine         | 0.018807902  | 0.033134206 | 0.571216644 |
| pcaac323.putrescine                | 0.02462226   | 0.043380348 | 0.571242227 |
| pcaec445.c162                      | -0.029913558 | 0.052706108 | 0.571266797 |
| pcaec421.lysopcac180               | 0.041777804  | 0.073613615 | 0.571284196 |
| smohc161.lysopcac281               | -0.008085032 | 0.014246231 | 0.57128925  |
| smc180.pcaec341                    | 0.046394986  | 0.081751018 | 0.571292684 |
| asymmetricdimethylarginine.pcaec40 | 0.025541195  | 0.045008299 | 0.57131859  |
| lysopcac280.serine                 | -0.012750944 | 0.022475282 | 0.5714172   |
| pcaec382.pcaac321                  | 0.009287318  | 0.016371164 | 0.571440581 |
| pcaec446.c16                       | -0.027628556 | 0.048711053 | 0.571511431 |
| pcaac360.prolinr                   | 0.021949136  | 0.038702591 | 0.571558564 |
| c10.pcaec363                       | -0.007938889 | 0.014001376 | 0.571636729 |
| c16.pcaec385                       | -0.024450186 | 0.043123721 | 0.571657146 |
| pcaac424.pcaec446                  | 0.039084736  | 0.06895121  | 0.571746172 |
| lysopcac181.pcaec361               | 0.002094865  | 0.003695802 | 0.571761964 |
| alphaaminoadipicacid.c10           | -0.01307916  | 0.023080678 | 0.571864657 |
| pcaec406.pcaac424                  | -0.006422239 | 0.011333903 | 0.57188614  |
| pcaac386.putrescine                | 0.014052374  | 0.024799745 | 0.571890153 |
| putrescine.pcaec402                | -0.033916276 | 0.05986046  | 0.571920524 |
| pcaac363.alphaaminoadipicacid      | 0.001261628  | 0.002226734 | 0.571925013 |
| pcaac320.putrescine                | 0.014048513  | 0.0248018   | 0.57202744  |
| smc160.pcaec420                    | 0.00807641   | 0.014259486 | 0.572056316 |
| c3.c51dc                           | 0.065934799  | 0.116484572 | 0.57229334  |
| pcaec382.smc241                    | 0.01526851   | 0.026985796 | 0.572456639 |
| pcaec403.pcaac363                  | -0.012555642 | 0.022192535 | 0.572482616 |
| pcaac365.pcaac403                  | -0.00792554  | 0.014009307 | 0.572500097 |
| glutamicacid.lysopcac160           | 0.018842174  | 0.033309803 | 0.572547153 |
| pcaec425.pcaec406                  | 0.003227458  | 0.005705853 | 0.572563807 |
| pcaec365.methioninesulfoxide       | 0.005740823  | 0.010151599 | 0.57265246  |
| pcaac401.pcaac321                  | 0.005684657  | 0.010052325 | 0.572654136 |
| pcaec300.asparagine                | 0.00245466   | 0.00434182  | 0.572758594 |
| glutamine.pcaec382                 | -0.011301288 | 0.019991134 | 0.572784165 |
| c12.spermidine                     | 0.02932561   | 0.051889882 | 0.572895482 |
| lysine.isoleucine                  | 0.014797152  | 0.026183906 | 0.572913733 |
| methioninesulfoxide.pcaac362       | -0.00787359  | 0.013933792 | 0.572949252 |
| pcaac323.pcaac322                  | 0.023010203  | 0.040725759 | 0.572995308 |
| lysopcac203.smc160                 | 0.057828398  | 0.102353808 | 0.573007748 |
| pcaec420.pcaac383                  | 0.003272779  | 0.005793056 | 0.573032691 |
| pcaac425.c2                        | 0.039566348  | 0.070050832 | 0.573117586 |
| c142.pcaec384                      | -0.008959747 | 0.015865587 | 0.573182061 |

|                               |              |             |             |
|-------------------------------|--------------|-------------|-------------|
| pcaec421.pcaec405             | -0.062506739 | 0.110699996 | 0.573235293 |
| lysopcac140.pcaec343          | 0.054728924  | 0.096929209 | 0.573250283 |
| c51dc.glutamine               | -0.00934614  | 0.01655706  | 0.573350085 |
| smc161.valine                 | 0.036001252  | 0.063800042 | 0.573484495 |
| pcaac365.pcaec421             | 0.001039475  | 0.00184217  | 0.573495192 |
| pcaec405.pcaac365             | 0.025532964  | 0.045254425 | 0.573534268 |
| smohc222.lysopcac170          | 0.005620268  | 0.009962518 | 0.573580391 |
| c2.pcaac366                   | 0.005957317  | 0.010561535 | 0.573637    |
| pcaec385.pcaac381             | -0.015907623 | 0.028203159 | 0.573651196 |
| smc241.pcaec404               | 0.007562603  | 0.013409004 | 0.573680049 |
| pcaac405.pcaac366             | -0.009221268 | 0.01635192  | 0.573726666 |
| pcaac404.alphaaminoadipicacid | 0.001526074  | 0.002706653 | 0.573796274 |
| pcaac384.pcaac341             | -0.006392121 | 0.011337247 | 0.57380112  |
| arginine.pcaac386             | 0.003770487  | 0.006689587 | 0.573923834 |
| pcaec363.methioninesulfoxide  | 0.005562603  | 0.00987205  | 0.574036084 |
| pcaec321.pcaec384             | -0.007990078 | 0.014180813 | 0.574054407 |
| pcaec343.smc161               | -0.033425603 | 0.059326024 | 0.574068402 |
| spermidine.lysopcac204        | -0.022446338 | 0.03985176  | 0.57418818  |
| c181.pcaac404                 | 0.002371299  | 0.004210385 | 0.574217579 |
| pcaec384.tryptophan           | 0.001891792  | 0.003358995 | 0.574218038 |
| lysopcac204.pcaec445          | 0.025367665  | 0.045069666 | 0.5744539   |
| asparticacid.serotonin        | 0.050180443  | 0.08915589  | 0.574464199 |
| pcaac403.pcaec342             | 0.042592473  | 0.075675193 | 0.574468713 |
| pcaac386.alanine              | -0.006932567 | 0.01231932  | 0.574532038 |
| asparagine.threonine          | 0.009490557  | 0.016865045 | 0.574534814 |
| pcaac401.glutamine            | -0.007107709 | 0.012631572 | 0.574562949 |
| smc180.c8                     | 0.01961978   | 0.03487109  | 0.574601331 |
| c51.pcaac364                  | 0.031478683  | 0.055968763 | 0.574740137 |
| prolinr.pcaac363              | -0.013973808 | 0.024847334 | 0.574771685 |
| smc260.pcaac362               | -0.002660113 | 0.004730609 | 0.574817354 |
| c182.pcaec425                 | -0.003208485 | 0.005706042 | 0.574833157 |
| pcaec443.smc261               | 0.026047341  | 0.046323917 | 0.574839289 |
| c101.smc202                   | 0.019776962  | 0.035176743 | 0.574886934 |
| smc240.pcaac384               | 0.030604024  | 0.054436459 | 0.574900367 |
| glutamicacid.histidine        | -0.030242411 | 0.053794404 | 0.574908595 |
| pcaac361.lysopcac204          | -0.006919245 | 0.012308728 | 0.574938274 |
| pcaec406.lysopcac280          | 0.00286949   | 0.005105654 | 0.57501935  |
| pcaec381.pcaac363             | -0.009077745 | 0.016154183 | 0.575072439 |
| lysopcac140.pcaec405          | -0.015035838 | 0.026759581 | 0.57511168  |
| glutamine.lysopcac160         | 0.012528623  | 0.022299953 | 0.575154704 |
| pcaac424.lysopcac280          | 0.005832357  | 0.010385092 | 0.575300271 |
| smc260.c18                    | 0.01567358   | 0.027910788 | 0.575333383 |
| c2.threonine                  | 0.013219051  | 0.023540827 | 0.57534878  |
| pcaec321.smc260               | -0.011979176 | 0.021333272 | 0.575356771 |
| lysopcac204.pcaac363          | 0.006794716  | 0.012102393 | 0.575417762 |



|                               |              |             |             |
|-------------------------------|--------------|-------------|-------------|
| pcaec382.lysopcac160          | 0.038051693  | 0.067778905 | 0.575435882 |
| phenylalanine.smohc241        | 0.03212859   | 0.057234113 | 0.575473424 |
| c10.smc240                    | 0.01502043   | 0.026760175 | 0.575511465 |
| pcaec362.pcaac323             | 0.058631973  | 0.104462717 | 0.575529222 |
| pcaec404.smc260               | -0.01973226  | 0.03515861  | 0.575553883 |
| pcaac361.alphaaminoadipicacid | 0.002690605  | 0.004794237 | 0.57556672  |
| pcaec404.phenylalanine        | -0.02803682  | 0.049965596 | 0.575630677 |
| pcaec384.c102                 | 0.010793996  | 0.019239196 | 0.57568544  |
| pcaac360.c162                 | 0.025251395  | 0.045008068 | 0.575685723 |
| pcaec363.pcaac323             | -0.041045122 | 0.073162024 | 0.575702557 |
| pcaac341.c4                   | -0.01232971  | 0.021980968 | 0.575763857 |
| pcaac342.pcaec425             | -0.002970978 | 0.005297268 | 0.575815239 |
| pcaec360.valine               | -0.036521249 | 0.065130412 | 0.575890491 |
| pcaec300.pcaac384             | -0.028525013 | 0.050871481 | 0.575899562 |
| pcaec301.pcaec365             | 0.018027345  | 0.03215925  | 0.576009807 |
| h1.pcaec384                   | 0.012681504  | 0.022624331 | 0.576036889 |
| pcaac342.serine               | -0.0071931   | 0.012834736 | 0.576094689 |
| isoleucine.smc180             | 0.018337215  | 0.032727634 | 0.576191546 |
| pcaac366.asparagine           | 0.005885646  | 0.010508087 | 0.576321601 |
| pcaac281.pcaac422             | -0.005970285 | 0.010659322 | 0.576326007 |
| smc202.c101                   | 0.01054699   | 0.018833589 | 0.576387438 |
| pcaac240.h1                   | 0.001330508  | 0.002376536 | 0.576494607 |
| smohc161.pcaec380             | 0.017274857  | 0.030856746 | 0.576502421 |
| c0.c18                        | -0.026336682 | 0.047051277 | 0.576567914 |
| c51dc.c16                     | -0.0212733   | 0.038010829 | 0.576622379 |
| pcaac406.pcaac402             | -0.031553617 | 0.05637997  | 0.576625198 |
| pcaac361.pcaec322             | -0.029975603 | 0.053560926 | 0.576629122 |
| pcaec446.pcaac424             | -0.005327111 | 0.009519947 | 0.576684053 |
| ornithine.c141oh              | 0.045531956  | 0.081374626 | 0.576710242 |
| pcaac322.smohc141             | 0.00637588   | 0.011398229 | 0.576819418 |
| lysine.serine                 | 0.01365827   | 0.024419232 | 0.576853638 |
| h1.c3                         | 0.022577758  | 0.040366253 | 0.576854786 |
| serine.pcaec425               | 0.001192395  | 0.002132055 | 0.576890589 |
| serotonin.pcaac281            | -0.00092235  | 0.001650059 | 0.577087964 |
| acetylmethionine.histidine    | 0.035220744  | 0.063022538 | 0.577169969 |
| pcaec360.lysopcac280          | -0.00983627  | 0.017604645 | 0.57725708  |
| c181.arginine                 | 0.019187229  | 0.034343488 | 0.57728799  |
| alanine.c16                   | -0.015895851 | 0.028454272 | 0.57731562  |
| smohc221.methioninesulfoxide  | 0.003629044  | 0.006497027 | 0.577367056 |
| lysopcac160.c0                | 0.001264424  | 0.002263765 | 0.577381319 |
| arginine.smc241               | 0.003394362  | 0.00607713  | 0.577382711 |
| asparagine.ornithine          | -0.015956368 | 0.02857424  | 0.577470542 |
| lysopcac160.pcaac365          | -0.030869245 | 0.055292215 | 0.577555737 |
| h1.serotonin                  | -0.034937562 | 0.062581949 | 0.577571938 |
| pcaac383.asparticacid         | 0.01057481   | 0.018942234 | 0.577573812 |

|                                    |              |             |             |
|------------------------------------|--------------|-------------|-------------|
| c182.pcaec443                      | 0.034520345  | 0.061838429 | 0.577595424 |
| pcaec425.pcaec360                  | -0.019450299 | 0.03484898  | 0.577665844 |
| pcaac342.pcaec360                  | 0.001967431  | 0.003525416 | 0.577707073 |
| ornithine.pcaec341                 | 0.015383908  | 0.027569246 | 0.577748466 |
| pcaac383.lysopcac204               | -0.00698494  | 0.012517925 | 0.57775845  |
| c12.smc241                         | -0.010923076 | 0.019577001 | 0.577786084 |
| c51.c8                             | -0.015142089 | 0.027140609 | 0.577814583 |
| asymmetricdimethylarginine.glutami | 0.02123507   | 0.038064558 | 0.577843722 |
| pcaec446.pcaec382                  | -0.006352769 | 0.011389776 | 0.577918118 |
| serine.asparagine                  | 0.005103554  | 0.009150757 | 0.577946215 |
| c5.lysopcac180                     | -0.045438397 | 0.081491394 | 0.578037575 |
| smc260.pcaec405                    | -0.014771752 | 0.026494919 | 0.578074167 |
| c141.pcaac364                      | 0.019127442  | 0.034307388 | 0.578074331 |
| pcaec384.alphaaminoadipicacid      | 0.001498024  | 0.002686974 | 0.578086363 |
| pcaac421.glutamicacid              | 0.032200622  | 0.057757763 | 0.578087741 |
| pcaac421.asymmetricdimethylarginir | 0.011000291  | 0.019732683 | 0.578119104 |
| pcaec383.lysopcac204               | -0.026153936 | 0.046923622 | 0.578182485 |
| pcaac361.asparagine                | 0.007986777  | 0.014329908 | 0.578197689 |
| kynurenine.smc240                  | -0.009217018 | 0.01653775  | 0.578210044 |
| arginine.smc260                    | 0.010061858  | 0.018057727 | 0.578296477 |
| c162.c2                            | -0.021247821 | 0.038135163 | 0.578319498 |
| lysopcac180.pcaec425               | 0.002243948  | 0.00402859  | 0.578432333 |
| isoleucine.pcaec403                | -0.030033248 | 0.053925065 | 0.578474327 |
| pcaac383.c142                      | -0.023672781 | 0.042513044 | 0.578548193 |
| histidine.taurine                  | -0.012283153 | 0.022063311 | 0.578624997 |
| pcaec386.h1                        | -0.001269178 | 0.002279764 | 0.578630674 |
| pcaec403.pcaec424                  | 0.010374446  | 0.018635344 | 0.57863516  |
| pcaec404.pcaac385                  | -0.017408898 | 0.031272143 | 0.578647291 |
| c16.arginine                       | 0.019527361  | 0.035090815 | 0.578790132 |
| spermidine.c142                    | -0.068555663 | 0.123196799 | 0.57879553  |
| pcaac404.pcaac380                  | -0.021070592 | 0.037866941 | 0.578819456 |
| pcaac323.pcaec444                  | 0.038334821  | 0.068908014 | 0.578900491 |
| smohc141.pcaec365                  | 0.013595321  | 0.024446853 | 0.579037738 |
| pcaec341.pcaac362                  | -0.004113025 | 0.007396362 | 0.5790581   |
| smohc161.valine                    | 0.041145723  | 0.073993005 | 0.579066074 |
| lysopcac161.smohc241               | 0.035852177  | 0.064478811 | 0.579097072 |
| pcaac281.methionine                | -0.015815352 | 0.028444788 | 0.579116585 |
| alphaaminoadipicacid.smc240        | -0.007906585 | 0.014222663 | 0.579176064 |
| lysopcac160.c101                   | -0.008048907 | 0.014478866 | 0.579181006 |
| pcaec406.pcaac361                  | -0.040885415 | 0.073558641 | 0.579240018 |
| c141.pcaac362                      | 0.005945543  | 0.010697323 | 0.579255998 |
| pcaac386.alphaaminoadipicacid      | 0.00125398   | 0.002256228 | 0.579263722 |
| pcaec423.pcaac406                  | 0.020467618  | 0.036826673 | 0.579266108 |
| smohc222.glutamicacid              | 0.016267005  | 0.029269062 | 0.579271355 |
| pcaac341.pcaec342                  | -0.054344448 | 0.097789234 | 0.579301599 |

|                                      |              |             |             |
|--------------------------------------|--------------|-------------|-------------|
| pcaec423.pcaac281                    | -0.001605284 | 0.002888618 | 0.579303817 |
| smohc241.pcaac402                    | 0.039254666  | 0.070642059 | 0.57933318  |
| pcaec380.pcaec342                    | 0.043510223  | 0.078303557 | 0.579348987 |
| ornithine.pcaec425                   | 0.002128629  | 0.003830879 | 0.579356279 |
| kynurenine.serine                    | -0.017788113 | 0.032013436 | 0.579359664 |
| pcaec403.pcaec423                    | 0.014884107  | 0.026791791 | 0.579426431 |
| pcaec422.pcaac366                    | -0.008258993 | 0.014866778 | 0.579435828 |
| smc202.lysopcac170                   | 0.005090209  | 0.009164318 | 0.579501064 |
| pcaac426.pcaac321                    | -0.026680973 | 0.048038976 | 0.5795251   |
| pcaec380.lysopcac160                 | 0.010209426  | 0.018386232 | 0.579611722 |
| pcaec405.lysopcac140                 | 0.001612118  | 0.002903847 | 0.579686273 |
| pcaac281.pcaac403                    | 0.004221949  | 0.00760576  | 0.579732198 |
| pcaac365.leucine                     | 0.004455896  | 0.008027833 | 0.579761563 |
| isoleucine.smc202                    | 0.025847774  | 0.046575465 | 0.579823252 |
| c12.pcaac422                         | 0.009499519  | 0.017120377 | 0.579890957 |
| pcaac323.pcaac342                    | 0.004200441  | 0.007570937 | 0.57992843  |
| pcaac364.glutamicacid                | -0.020928068 | 0.037729715 | 0.580015283 |
| pcaac422.smohc241                    | -0.039131028 | 0.070551618 | 0.580042575 |
| pcaac341.transhydroxyproline         | -0.010486581 | 0.018907247 | 0.580050118 |
| c2.c0                                | 0.001944873  | 0.003506659 | 0.580056977 |
| pcaec424.pcaec445                    | 0.039067467  | 0.070440485 | 0.580061187 |
| pcaac361.pcaac405                    | 0.037456656  | 0.067544711 | 0.580109338 |
| c101.pcaac421                        | 0.020473576  | 0.036923711 | 0.580152272 |
| pcaac424.pcaac363                    | -0.006448392 | 0.011629891 | 0.580163194 |
| lysine.pcaac383                      | 0.004165423  | 0.007513034 | 0.580191097 |
| serine.pcaac240                      | -0.005422795 | 0.009781684 | 0.580220931 |
| pcaec381.pcaac362                    | -0.005413624 | 0.009765612 | 0.580239194 |
| pcaac405.smc261                      | -0.015045085 | 0.0271435   | 0.580291249 |
| c3.pcaac424                          | 0.003044687  | 0.005493505 | 0.580322316 |
| c3.c142                              | -0.027185508 | 0.049060231 | 0.580396568 |
| pcaec383.h1                          | 0.001019681  | 0.001840287 | 0.58042186  |
| pcaec300.pcaac362                    | 0.010121991  | 0.018268006 | 0.580425364 |
| pcaec300.ornithine                   | -0.015087806 | 0.027230611 | 0.580430658 |
| histidine.pcaec406                   | 0.002442185  | 0.004408338 | 0.580487279 |
| citruline.asymmetricdimethylarginine | -0.00907929  | 0.016389659 | 0.58050616  |
| pcaec443.c3                          | -0.023304676 | 0.042069838 | 0.580514647 |
| pcaac384.arginine                    | 0.013409842  | 0.024212336 | 0.580588867 |
| pcaac364.valine                      | -0.024422461 | 0.044101625 | 0.58063425  |
| pcaac380.ornithine                   | -0.008657799 | 0.015638083 | 0.580730705 |
| asparticacid.pcaac383                | 0.004653371  | 0.008407424 | 0.580834464 |
| pcaac323.lysopcac203                 | 0.013598377  | 0.024569326 | 0.58084398  |
| alanine.lysopcac182                  | -0.006201409 | 0.011205752 | 0.580882662 |
| pcaec321.pcaec403                    | -0.011654951 | 0.021061109 | 0.580900197 |
| c3.pcaec365                          | -0.009217074 | 0.016656667 | 0.580921263 |
| lysopcac161.pcaec383                 | -0.06043821  | 0.109225873 | 0.580937715 |

|                               |              |             |             |
|-------------------------------|--------------|-------------|-------------|
| pcaec401.pcaac344             | -0.020317425 | 0.036721331 | 0.580968881 |
| pcaec382.pcaac421             | 0.011981657  | 0.0216588   | 0.58102782  |
| c8.c5                         | -0.004677403 | 0.008455887 | 0.581059864 |
| pcaac240.smc241               | 0.010886008  | 0.0196825   | 0.581109637 |
| pcaac361.glutamicacid         | -0.015723348 | 0.028434939 | 0.581192827 |
| c18.putrescine                | 0.01294263   | 0.023407646 | 0.581217096 |
| lysopcac161.pcaec403          | 0.014683457  | 0.026559157 | 0.581261251 |
| c12.alphaaminoadipicacid      | -0.001904369 | 0.003444962 | 0.581302464 |
| pcaec443.pcaec340             | -0.024415263 | 0.044169622 | 0.581327567 |
| smohc241.pcaec385             | -0.022163317 | 0.040097107 | 0.581341491 |
| smc202.pcaec446               | -0.01056518  | 0.019115283 | 0.58136368  |
| pcaec444.smc241               | 0.012764745  | 0.023097368 | 0.581404148 |
| c162.pcaec341                 | 0.027978172  | 0.05062968  | 0.581434979 |
| c142.pcaec320                 | -0.027954523 | 0.050591609 | 0.581470236 |
| pcaac360.pcaec403             | -0.009471709 | 0.017142779 | 0.581493244 |
| c18.smc202                    | -0.020667756 | 0.037407382 | 0.581502881 |
| smc180.serine                 | -0.009808611 | 0.017755904 | 0.581564837 |
| c51dc.smc160                  | 0.036101576  | 0.065360112 | 0.581609447 |
| pcaac405.pcaac383             | -0.00238683  | 0.004321498 | 0.581632208 |
| lysopcac280.pcaac403          | 0.006203139  | 0.011235633 | 0.581782639 |
| pcaac240.pcaac321             | 0.005884231  | 0.010660126 | 0.581857876 |
| pcaec403.pcaac406             | 0.028141978  | 0.050986793 | 0.581884301 |
| pcaec383.lysopcac182          | -0.01988835  | 0.036043475 | 0.58199269  |
| serine.taurine                | -0.014992852 | 0.027174385 | 0.582033988 |
| c10.c3                        | 0.022886598  | 0.041485335 | 0.58206687  |
| alphaaminoadipicacid.pcaac240 | 0.004341794  | 0.007872323 | 0.582171309 |
| c101.ornithine                | 0.016357066  | 0.02966159  | 0.582219333 |
| pcaec381.pcaac425             | -0.057866443 | 0.104945179 | 0.582259852 |
| pcaac384.pcaac403             | -0.001659104 | 0.003011518 | 0.58258619  |
| pcaec385.pcaac364             | 0.027582056  | 0.050067532 | 0.582601508 |
| pcaac420.pcaac425             | -0.047598912 | 0.086417784 | 0.582667884 |
| pcaec383.smc241               | 0.008879139  | 0.01612369  | 0.582743745 |
| pcaec405.taurine              | -0.034013075 | 0.061792121 | 0.582911582 |
| pcaac344.pcaac422             | -0.018894171 | 0.034327849 | 0.582938919 |
| pcaac343.pcaec343             | 0.053894914  | 0.097924635 | 0.582960953 |
| pcaec342.lysopcac182          | 0.010529934  | 0.019133637 | 0.582984964 |
| smc240.phenylalanine          | 0.021261812  | 0.038650975 | 0.583148115 |
| ornithine.c141                | -0.010759993 | 0.019563079 | 0.583204447 |
| glutamicacid.valine           | 0.043177153  | 0.078507937 | 0.583234207 |
| lysopcac170.pcaac385          | -0.015299348 | 0.027818716 | 0.583238187 |
| c101.alphaaminoadipicacid     | 0.004696519  | 0.008541209 | 0.583306705 |
| methionine.pcaec342           | -0.041989981 | 0.076378463 | 0.583377696 |
| c3.c182                       | -0.021303573 | 0.038751679 | 0.583388811 |
| pcaac360.alanine              | -0.006743753 | 0.012267785 | 0.583411687 |
| smc180.pcaec406               | 0.002841232  | 0.005169126 | 0.583451456 |

|                                  |              |             |             |
|----------------------------------|--------------|-------------|-------------|
| pcaac323.pcaec403                | -0.006858728 | 0.012483112 | 0.58359767  |
| pcaac380.pcaec366                | -0.03018035  | 0.054945297 | 0.583707544 |
| smc181.glutamicacid              | 0.018084842  | 0.032932418 | 0.583796362 |
| pcaec443.pcaac321                | 0.006164234  | 0.011226162 | 0.583833834 |
| pcaac406.pcaec341                | -0.021526834 | 0.039210356 | 0.583893029 |
| lysopcac160.pcaac362             | -0.003445846 | 0.006276975 | 0.583922344 |
| pcaec361.c14                     | -0.038284511 | 0.069753988 | 0.58400144  |
| leucine.c141                     | -0.012939196 | 0.023575144 | 0.584002412 |
| asparticacid.lysopcac140         | 0.000539279  | 0.000982596 | 0.584015318 |
| pcaac406.alphaaminoadipicacid    | 0.00146711   | 0.002673316 | 0.584037432 |
| smohc141.pcaec403                | -0.012548043 | 0.022867772 | 0.584089587 |
| lysopcac161.methionine           | -0.019345432 | 0.035260847 | 0.58414706  |
| creatinine.pcaec384              | -0.031366745 | 0.057174863 | 0.584165533 |
| c4.glutamicacid                  | 0.021651678  | 0.039470422 | 0.584204043 |
| pcaac342.pcaac362                | -0.003749534 | 0.006835683 | 0.584225192 |
| pcaac300.pcaac361                | -0.031016861 | 0.056553308 | 0.584273176 |
| serine.c182                      | 0.017117307  | 0.031212588 | 0.584302719 |
| alphaaminoadipicacid.lysopcac180 | -0.027887944 | 0.050862155 | 0.584375254 |
| c16.asymmetricdimethylarginine   | 0.014884474  | 0.027153213 | 0.584469888 |
| pcaec382.pcaec422                | 0.02138763   | 0.039017583 | 0.584478489 |
| lysopcac160.taurine              | -0.022895394 | 0.041772006 | 0.584512622 |
| smc180.asparagine                | 0.004210171  | 0.007681721 | 0.584531288 |
| c0.serine                        | -0.014711591 | 0.026844217 | 0.58455919  |
| pcaac422.smohc222                | 0.001866383  | 0.003405789 | 0.584581694 |
| pcaec424.c8                      | 0.017652722  | 0.032213652 | 0.584591325 |
| smohc222.pcaec365                | 0.019009673  | 0.034692887 | 0.584623741 |
| methioninesulfoxide.serotonin    | -0.065521853 | 0.119579934 | 0.584629213 |
| pcaac422.pcaac364                | 0.03019571   | 0.055109965 | 0.584640227 |
| alanine.c14                      | 0.017856223  | 0.03259599  | 0.584717705 |
| pcaec423.c3                      | -0.014404717 | 0.026297521 | 0.584748368 |
| lysopcac161.pcaec340             | -0.015741143 | 0.028737429 | 0.584749721 |
| lysopcac281.pcaec406             | 0.001608101  | 0.002936049 | 0.584782719 |
| c51.pcaec301                     | 0.023770501  | 0.043400836 | 0.584791282 |
| lysopcac204.serotonin            | -0.040982133 | 0.074828368 | 0.584801611 |
| pcaec423.pcaac404                | 0.002984133  | 0.005448927 | 0.584819851 |
| isoleucine.alphaaminoadipicacid  | 0.008982091  | 0.016403124 | 0.584868451 |
| histidine.lysopcac203            | 0.012639048  | 0.023083018 | 0.584893583 |
| c142.lysopcac140                 | -0.00096135  | 0.001755813 | 0.584909507 |
| pcaac363.c182                    | 0.012610775  | 0.023033732 | 0.584931857 |
| pcaac424.pcaac385                | -0.009741641 | 0.017793832 | 0.584944659 |
| lysopcac281.serine               | -0.005610229 | 0.010248682 | 0.584987909 |
| acetylorithoine.pcaec364         | -0.015056823 | 0.027516325 | 0.585134345 |
| smc260.acetylorithoine           | 0.012643381  | 0.023106473 | 0.585145863 |
| pcaac401.c51dc                   | -0.063282222 | 0.115666658 | 0.58519423  |
| phenylalanine.lysopcac170        | -0.007417553 | 0.013558216 | 0.585207551 |

|                              |              |             |             |
|------------------------------|--------------|-------------|-------------|
| c14.pcaec361                 | -0.00435055  | 0.007952928 | 0.585242904 |
| pcaec383.c102                | -0.015117574 | 0.027639235 | 0.58529558  |
| pcaec382.smc202              | 0.044936695  | 0.082159572 | 0.585306913 |
| isoleucine.smc261            | -0.028494602 | 0.052100491 | 0.585326039 |
| c101.pcaec341                | 0.02595489   | 0.047463769 | 0.585381102 |
| pcaac240.pcaac422            | -0.013632082 | 0.024929751 | 0.585392088 |
| kynurenine.glutamicacid      | 0.028849366  | 0.052758469 | 0.585392211 |
| lysopcac140.valine           | -0.028164609 | 0.05150628  | 0.585392694 |
| c3.threonine                 | 0.01411978   | 0.025824577 | 0.585434809 |
| c3.pcaac342                  | -0.004694236 | 0.008585687 | 0.585438971 |
| pcaac381.lysopcac181         | -0.014858234 | 0.027175832 | 0.585443752 |
| c14.alphaaminoadipicacid     | -0.001263153 | 0.002310538 | 0.585479627 |
| pcaec365.methionine          | -0.011376413 | 0.020810603 | 0.585498687 |
| lysopcac181.c5               | 0.005460606  | 0.009989664 | 0.585525175 |
| c141oh.smc161                | -0.0184614   | 0.033774701 | 0.585539693 |
| acetylnithoine.pcaac383      | -0.001210667 | 0.002214941 | 0.585548684 |
| pcaac384.pcaec340            | 0.028307906  | 0.051808861 | 0.585685793 |
| glutamicacid.pcaac344        | 0.038100162  | 0.069735127 | 0.585710348 |
| serotonin.asparagine         | -0.010044882 | 0.018386636 | 0.585738513 |
| c51.pcaec342                 | -0.032918359 | 0.060269961 | 0.585829291 |
| pcaac420.pcaac344            | -0.018220548 | 0.033359979 | 0.585830659 |
| asparagine.pcaec406          | 0.000613917  | 0.001124062 | 0.585844445 |
| pcaac364.pcaac404            | 0.005087856  | 0.009316658 | 0.585883271 |
| pcaec422.smc241              | 0.010811667  | 0.019801803 | 0.58595802  |
| methioninesulfoxide.pcaec383 | -0.049505526 | 0.090673085 | 0.585968901 |
| pcaec403.smc261              | -0.036691474 | 0.067204622 | 0.585976895 |
| c182.pcaac366                | 0.005457712  | 0.009998639 | 0.586059846 |
| ornithine.pcaac425           | -0.034398412 | 0.063034802 | 0.586156131 |
| lysopcac140.c142             | 0.02480424   | 0.045454144 | 0.58616091  |
| lysopcac140.pcaec425         | 0.001864676  | 0.003417104 | 0.586167143 |
| pcaac386.lysopcac281         | 0.006241842  | 0.011440955 | 0.586248754 |
| putrescine.pcaec445          | -0.036147284 | 0.066272342 | 0.58634101  |
| pcaec360.serotonin           | 0.054093949  | 0.099179568 | 0.586355547 |
| arginine.c3                  | -0.022583752 | 0.041410341 | 0.586389286 |
| pcaac300.pcaac362            | -0.004650342 | 0.008533255 | 0.586662318 |
| pcaec444.serine              | -0.003862345 | 0.007087321 | 0.586663371 |
| pcaac403.pcaac320            | -0.037766536 | 0.069303423 | 0.586677531 |
| asparticacid.methionine      | -0.008502386 | 0.015603642 | 0.586709921 |
| smc181.c8                    | 0.018720359  | 0.034356831 | 0.586721758 |
| pcaec380.glutamicacid        | 0.032748034  | 0.060110147 | 0.586776519 |
| glycine.pcaac404             | -0.002658612 | 0.004881037 | 0.586857888 |
| glutamicacid.c141oh          | -0.052225827 | 0.095900772 | 0.586926418 |
| pcaec405.pcaac364            | 0.023381426  | 0.042950523 | 0.587064625 |
| lysine.h1                    | -0.001653203 | 0.003037082 | 0.58709301  |
| c141oh.smohc241              | 0.023539134  | 0.043253743 | 0.587181371 |

|                              |              |             |             |
|------------------------------|--------------|-------------|-------------|
| creatinine.smc260            | 0.005594441  | 0.01028074  | 0.587211026 |
| lysopcac203.pcaec405         | -0.021472949 | 0.039464508 | 0.587251675 |
| pcaac421.asparticacid        | 0.021805744  | 0.040077833 | 0.587267433 |
| pcaec446.c102                | -0.011848253 | 0.021779393 | 0.587317401 |
| smc181.pcaec401              | -0.010517026 | 0.01933325  | 0.587334991 |
| pcaec385.methioninesulfoxide | 0.006144065  | 0.011294664 | 0.587339814 |
| c12.pcaec406                 | -0.002509754 | 0.004614527 | 0.587407284 |
| pcaac363.acetylnithoine      | 0.005557516  | 0.010219259 | 0.587443992 |
| pcaac406.pcaec384            | 0.011685621  | 0.021496527 | 0.587596771 |
| c12.pcaec365                 | -0.012309811 | 0.022658307 | 0.587819721 |
| alanine.pcaec300             | 0.007268434  | 0.013380821 | 0.587876241 |
| pcaec401.leucine             | 0.02618497   | 0.048207668 | 0.587895266 |
| pcaec382.pcaec341            | -0.025902642 | 0.04768914  | 0.587905046 |
| asparagine.pcaac323          | 0.0411307    | 0.075727807 | 0.587916946 |
| pcaec420.c182                | 0.010897459  | 0.020066037 | 0.587957374 |
| pcaec383.glycine             | 0.013407851  | 0.024689067 | 0.587965199 |
| smc202.pcaac363              | 0.0029058    | 0.005350708 | 0.587965271 |
| serotonin.lysopcac182        | -0.025092242 | 0.046206095 | 0.587977492 |
| c5.phenylalanine             | 0.026361899  | 0.048546145 | 0.587993161 |
| pcaec363.pcaec384            | -0.01549777  | 0.02854234  | 0.588029468 |
| pcaec341.c182                | 0.017401299  | 0.032048792 | 0.58803776  |
| c4.c162                      | -0.050831898 | 0.093625988 | 0.588063584 |
| pcaac362.pcaac421            | -0.014863999 | 0.027378114 | 0.588070256 |
| citruiline.pcaac361          | -0.019214384 | 0.03539235  | 0.588083192 |
| smc202.pcaec444              | 0.038368043  | 0.070674993 | 0.588094513 |
| lysopcac204.c12              | 0.031780964  | 0.058564031 | 0.588238505 |
| ornithine.pcaec421           | 0.000602337  | 0.001110009 | 0.588258016 |
| lysopcac161.pcaac344         | 0.024936129  | 0.045969138 | 0.588387318 |
| c101.pcaac362                | 0.001573202  | 0.002900174 | 0.588389334 |
| phenylalanine.pcaac422       | -0.007804302 | 0.01438877  | 0.588432158 |
| acetylnithoine.pcaac381      | 0.010208543  | 0.01882269  | 0.588456451 |
| c10.pcaac383                 | 0.002583828  | 0.00476567  | 0.588578704 |
| c4.creatinine                | 0.008614636  | 0.015889674 | 0.58859382  |
| pcaac360.glutamine           | -0.007956166 | 0.014676226 | 0.588621681 |
| acetylnithoine.tryptophan    | 0.001008236  | 0.001860196 | 0.588695437 |
| pcaac320.pcaac360            | -0.029378878 | 0.054211034 | 0.588743358 |
| pcaec401.pcaac406            | 0.015712453  | 0.028993448 | 0.588746246 |
| histidine.pcaac364           | 0.031755514  | 0.058602862 | 0.588783815 |
| pcaec443.pcaac425            | 0.059056173  | 0.108988927 | 0.588798725 |
| pcaac341.pcaac384            | 0.025316444  | 0.046723067 | 0.588808635 |
| c2.smohc161                  | 0.004704959  | 0.008684689 | 0.58886846  |
| pcaac401.histidine           | -0.041192755 | 0.076049722 | 0.588935623 |
| pcaac381.pcaec363            | 0.02299884   | 0.042467962 | 0.589003064 |
| smohc222.pcaec405            | -0.011147509 | 0.020584334 | 0.589006044 |
| c18.c51dc                    | 0.040960853  | 0.075642224 | 0.589037175 |

|                                   |              |             |             |
|-----------------------------------|--------------|-------------|-------------|
| alanine.taurine                   | -0.02061173  | 0.038066403 | 0.589064668 |
| pcaac405.smohc241                 | 0.019002089  | 0.035098141 | 0.589112118 |
| methioninesulfoxide.pcaac425      | -0.055078698 | 0.101741703 | 0.589140014 |
| pcaec301.pcaac385                 | 0.005562917  | 0.010276049 | 0.58914708  |
| pcaac281.pcaac361                 | -0.022859219 | 0.042230654 | 0.589183783 |
| pcaac425.asparagine               | -0.005971403 | 0.01103203  | 0.589194637 |
| pcaac401.pcaac323                 | -0.048953742 | 0.090470824 | 0.589317581 |
| c12.pcaac364                      | 0.016158298  | 0.0298685   | 0.589399051 |
| alphaaminoadipicacid.spermidine   | -0.028669853 | 0.052998533 | 0.589416684 |
| glutamine.pcaac403                | -0.00312346  | 0.005775314 | 0.589503373 |
| pcaec445.pcaec406                 | 0.001093913  | 0.002022729 | 0.589516433 |
| spermidine.c51                    | -0.052687742 | 0.097423954 | 0.58951752  |
| smc161.asymmetricdimethylarginine | 0.031371343  | 0.058009684 | 0.589527128 |
| methionine.pcaec406               | 0.003311211  | 0.0061236   | 0.589572092 |
| c5.methioninesulfoxide            | 0.007454901  | 0.013787976 | 0.589605238 |
| pcaac422.pcaec420                 | 0.010858162  | 0.020082893 | 0.589614931 |
| lysopcac280.pcaac424              | 0.019817911  | 0.036655177 | 0.589621333 |
| pcaac362.pcaac383                 | -0.002361958 | 0.004369035 | 0.589651957 |
| smc261.c5                         | -0.002946036 | 0.005450328 | 0.58971297  |
| pcaac342.c3                       | -0.039724429 | 0.073494338 | 0.589722983 |
| histidine.ornithine               | -0.034050348 | 0.063004796 | 0.589770753 |
| pcaec342.acetylnithoine           | 0.009229479  | 0.017082456 | 0.589874349 |
| arginine.pcaac383                 | -0.002751005 | 0.005093037 | 0.589970442 |
| serotonin.glutamicacid            | 0.017077993  | 0.031617983 | 0.589980582 |
| pcaec445.serine                   | -0.003841799 | 0.007112918 | 0.589994177 |
| pcaac383.pcaac424                 | 0.003509129  | 0.006497816 | 0.590041079 |
| prolinr.taurine                   | -0.013848858 | 0.025645782 | 0.590070082 |
| c3.lysopcac180                    | -0.021508791 | 0.039831269 | 0.590075356 |
| pcaac426.smc161                   | -0.030504811 | 0.05649161  | 0.590081739 |
| pcaec421.pcaac321                 | 0.006807464  | 0.012606794 | 0.590084878 |
| leucine.pcaec384                  | 0.014128747  | 0.026165888 | 0.590095604 |
| pcaec421.pcaac426                 | 0.048981771  | 0.090733485 | 0.590182204 |
| pcaec446.smohc141                 | -0.014082718 | 0.026088819 | 0.590212003 |
| pcaec381.c16                      | 0.015329926  | 0.028402181 | 0.590249352 |
| pcaec340.acetylnithoine           | 0.011136687  | 0.020633509 | 0.590253994 |
| pcaec385.asparticacid             | 0.026381566  | 0.04887869  | 0.590255631 |
| smc161.pcaec446                   | -0.011807111 | 0.021876045 | 0.590260903 |
| pcaec444.pcaec384                 | -0.017924619 | 0.033210692 | 0.590263331 |
| lysopcac170.pcaec301              | 0.017631705  | 0.03266979  | 0.590283883 |
| pcaec386.smohc141                 | -0.054782228 | 0.101508313 | 0.590292327 |
| pcaec382.smc160                   | -0.045705577 | 0.084691693 | 0.590300615 |
| pcaec445.tryptophan               | 0.001111266  | 0.002059284 | 0.590323141 |
| c181.pcaac385                     | 0.017351588  | 0.032154541 | 0.590327521 |
| pcaec301.pcaac322                 | 0.029067429  | 0.053866398 | 0.590334548 |
| pcaac363.c2                       | -0.041103696 | 0.076218323 | 0.590562876 |



|                                    |              |             |             |
|------------------------------------|--------------|-------------|-------------|
| pcaec363.acetylmethionine          | 0.011305687  | 0.020964719 | 0.590574483 |
| pcaec425.c8                        | 0.019612798  | 0.036373396 | 0.590619068 |
| pcaac404.pcaec300                  | 0.015525052  | 0.028794214 | 0.59064288  |
| smc160.c51                         | -0.023419733 | 0.043438385 | 0.590659605 |
| smc161.pcaac422                    | -0.014438463 | 0.026781091 | 0.590672903 |
| pcaec420.putrescine                | 0.014364048  | 0.026646635 | 0.590722631 |
| pcaec424.c51dc                     | -0.054659478 | 0.10140549  | 0.590748645 |
| c102.pcaac341                      | -0.002436911 | 0.004521255 | 0.590768546 |
| smohc161.asparticacid              | 0.011878761  | 0.022038945 | 0.590768866 |
| lysopcac280.pcaec443               | 0.037694682  | 0.069943985 | 0.590812105 |
| pcaac424.c2                        | -0.049311281 | 0.091509602 | 0.59085488  |
| pcaac344.lysopcac182               | -0.00671987  | 0.012471541 | 0.590888067 |
| smohc141.lysopcac182               | -0.011970026 | 0.022216737 | 0.590910184 |
| lysopcac181.lysopcac281            | -0.012397413 | 0.023011039 | 0.590927257 |
| pcaac384.pcaec365                  | -0.014347645 | 0.026633432 | 0.590962546 |
| pcaac344.c101                      | -0.001746981 | 0.003243231 | 0.590999336 |
| pcaec405.pcaac424                  | -0.008760678 | 0.016264546 | 0.591011835 |
| leucine.lysine                     | 0.057592736  | 0.106927193 | 0.591025686 |
| pcaac426.pcaec406                  | 0.004996399  | 0.009276773 | 0.591042176 |
| pcaac342.tyrosine                  | 0.025679216  | 0.047681078 | 0.591063111 |
| pcaac362.c3                        | -0.035021964 | 0.06503475  | 0.591097826 |
| pcaac403.pcaac406                  | 0.030506592  | 0.056660338 | 0.59116652  |
| pcaec300.h1                        | 0.000975416  | 0.001811839 | 0.59120451  |
| c12.prolinr                        | -0.019279393 | 0.035813147 | 0.591220849 |
| asparticacid.c51                   | -0.043172157 | 0.08020448  | 0.591259876 |
| methionine.pcaac405                | 0.026653757  | 0.049517798 | 0.591266719 |
| lysopcac182.pcaac405               | 0.011876879  | 0.022065813 | 0.591279283 |
| alphaaminoadipicacid.pcaec423      | 0.006140029  | 0.011408104 | 0.591300994 |
| pcaec422.smc160                    | -0.023288239 | 0.043270319 | 0.591309857 |
| smc181.pcaac300                    | -0.018843709 | 0.035014516 | 0.591333979 |
| pcaac402.c0                        | 0.000722057  | 0.001341862 | 0.591380483 |
| pcaac362.lysopcac203               | -0.009787902 | 0.018190764 | 0.591401864 |
| smohc241.lysopcac180               | 0.022725595  | 0.042235859 | 0.591405921 |
| smohc221.alanine                   | -0.015893276 | 0.029544882 | 0.591493579 |
| pcaec365.smc260                    | -0.014148988 | 0.026309005 | 0.59158754  |
| pcaec385.c8                        | -0.027771213 | 0.051639836 | 0.591596905 |
| glutamicacid.asparagine            | 0.006794212  | 0.012635914 | 0.591663019 |
| smc260.pcaec361                    | -0.002621927 | 0.004877138 | 0.591728638 |
| pcaec405.asymmetricdimethylarginir | 0.012206144  | 0.02270745  | 0.591767307 |
| pcaac344.serotonin                 | 0.04046436   | 0.075283406 | 0.591798585 |
| glutamicacid.methioninesulfoxide   | 0.015114632  | 0.028122445 | 0.591823221 |
| pcaec343.asymmetricdimethylarginir | 0.01800554   | 0.033504957 | 0.591863641 |
| pcaac422.pcaec423                  | -0.044185078 | 0.082223546 | 0.591878694 |
| pcaac281.c4                        | -0.005622144 | 0.01046313  | 0.591912037 |
| glutamicacid.c12                   | -0.057263636 | 0.106573501 | 0.591921071 |

|                               |              |             |             |
|-------------------------------|--------------|-------------|-------------|
| pcaac362.pcaac405             | 0.026062028  | 0.048511581 | 0.591978086 |
| pcaac281.smohc222             | -0.003139207 | 0.005843371 | 0.591983475 |
| smc260.lysopcac140            | -0.001121525 | 0.002087787 | 0.592012351 |
| pcaec341.alanine              | -0.006555209 | 0.012203555 | 0.592031417 |
| c181.lysopcac203              | -0.007459947 | 0.013888279 | 0.592042374 |
| asparticacid.spermidine       | -0.0283526   | 0.052785584 | 0.592050685 |
| c2.histidine                  | 0.027824011  | 0.051806571 | 0.592087043 |
| lysopcac182.pcaac360          | -0.013734369 | 0.025574795 | 0.592119692 |
| lysopcac180.histidine         | 0.017837565  | 0.033216668 | 0.592134223 |
| h1.pcaec402                   | 0.013460599  | 0.025067065 | 0.592150051 |
| lysine.ornithine              | -0.025407277 | 0.047322046 | 0.592206523 |
| pcaec401.c162                 | -0.033336315 | 0.062104315 | 0.592290668 |
| smc261.pcaac363               | 0.003397913  | 0.006330422 | 0.592304501 |
| smc181.transhydroxyproline    | -0.011719727 | 0.021836531 | 0.592343415 |
| pcaec424.c141                 | -0.011069612 | 0.020626152 | 0.59236018  |
| smc181.pcaac321               | 0.009872285  | 0.018397171 | 0.592400656 |
| pcaac420.smc240               | -0.032884507 | 0.061284962 | 0.592425536 |
| c141oh.glutamine              | -0.005064498 | 0.00943873  | 0.592437945 |
| pcaac404.valine               | -0.021201547 | 0.03951366  | 0.5924401   |
| pcaac422.pcaac321             | 0.008011616  | 0.014932969 | 0.592479547 |
| c12.pcaac385                  | 0.002031642  | 0.003786842 | 0.592482968 |
| smc180.c101                   | -0.017887273 | 0.033344403 | 0.592524477 |
| pcaec405.c101                 | 0.009189889  | 0.017132095 | 0.59254267  |
| lysopcac280.c0                | -0.00034446  | 0.000642154 | 0.592542884 |
| lysopcac160.pcaec422          | -0.033171953 | 0.061850516 | 0.592604013 |
| pcaec342.c4                   | -0.006466611 | 0.01205881  | 0.592651183 |
| phenylalanine.pcaac363        | -0.008094824 | 0.015096143 | 0.592677443 |
| pcaec362.pcaac386             | 0.008609167  | 0.016057363 | 0.592723845 |
| pcaac401.c18                  | -0.019008606 | 0.035458726 | 0.592774681 |
| pcaec321.pcaec406             | 0.001690795  | 0.003154366 | 0.59281568  |
| methionine.tryptophan         | -0.00314912  | 0.00587735  | 0.592961327 |
| pcaac363.pcaec343             | 0.039210186  | 0.073190936 | 0.593017549 |
| pcaac341.pcaec444             | 0.036501186  | 0.068140985 | 0.593054137 |
| pcaac364.alphaaminoadipicacid | 0.000852717  | 0.001592108 | 0.593110241 |
| pcaec401.pcaac363             | -0.021937381 | 0.040962569 | 0.593139998 |
| pcaec444.pcaec322             | -0.023673879 | 0.044215337 | 0.593225935 |
| glutamicacid.glutamine        | -0.00948588  | 0.017722422 | 0.593346567 |
| lysopcac181.pcaec382          | -0.003776818 | 0.007056282 | 0.593350255 |
| pcaac361.smc180               | -0.005993901 | 0.011198527 | 0.593351589 |
| pcaac365.pcaac363             | 0.005915059  | 0.011054334 | 0.593455354 |
| acetylornithine.pcaac404      | 0.004894256  | 0.009147844 | 0.593505131 |
| leucine.pcaec421              | 0.000419656  | 0.000784781 | 0.59369478  |
| pcaec321.ornithine            | -0.014971527 | 0.02799883  | 0.593710434 |
| pcaec300.pcaec365             | 0.009419073  | 0.017615509 | 0.59372168  |
| pcaec342.lysopcac281          | 0.015880002  | 0.029699726 | 0.593734308 |

|                                    |              |             |             |
|------------------------------------|--------------|-------------|-------------|
| pcaac383.pcaec361                  | -0.004177615 | 0.007813821 | 0.593762415 |
| pcaec402.pcaac383                  | 0.002536821  | 0.004745545 | 0.593814521 |
| pcaac425.tryptophan                | 0.0062831    | 0.011756306 | 0.593899859 |
| pcaac341.lysopcac281               | 0.007533822  | 0.01409961  | 0.593980408 |
| pcaec300.lysopcac161               | 0.025741479  | 0.048177874 | 0.593999394 |
| lysine.spermidine                  | -0.02839631  | 0.053146873 | 0.594000802 |
| pcaec383.lysopcac160               | -0.019262949 | 0.036058754 | 0.59406202  |
| pcaac402.c101                      | 0.020700437  | 0.038749633 | 0.594062134 |
| c162.lysopcac281                   | 0.004673546  | 0.008749265 | 0.594093569 |
| smc161.pcaac363                    | 0.002796907  | 0.005236693 | 0.594139398 |
| pcaec385.tryptophan                | 0.00127366   | 0.002384904 | 0.594171879 |
| pcaac401.smc241                    | 0.008839109  | 0.016553797 | 0.594232753 |
| pcaec300.pcaec382                  | 0.005557227  | 0.010407599 | 0.59423554  |
| pcaac425.valine                    | -0.021002931 | 0.039345522 | 0.59433985  |
| asymmetricdimethylarginine.pcaec36 | 0.008797684  | 0.016482378 | 0.594370471 |
| pcaec402.pcaec406                  | 0.008168733  | 0.015306021 | 0.594418042 |
| lysopcac170.c141                   | -0.007955285 | 0.014908703 | 0.594482954 |
| pcaec425.c142                      | 0.022094646  | 0.041407765 | 0.594491936 |
| pcaac240.pcaec380                  | 0.038051385  | 0.07132193  | 0.594541011 |
| pcaec420.pcaac342                  | -0.009181834 | 0.017210174 | 0.594543741 |
| pcaec386.threonine                 | 0.01520542   | 0.028504364 | 0.594592137 |
| pcaec444.tryptophan                | 0.001032398  | 0.001935747 | 0.59466713  |
| smc261.lysopcac140                 | -0.000620318 | 0.001163115 | 0.594672814 |
| pcaac322.pcaac403                  | -0.008408377 | 0.015767698 | 0.594713501 |
| pcaec343.lysopcac182               | 0.018856279  | 0.035368592 | 0.594803061 |
| c162.pcaec423                      | 0.020285525  | 0.038060325 | 0.59490852  |
| h1.smc160                          | -0.04104028  | 0.077011995 | 0.594960891 |
| c51.pcaac322                       | 0.032908787  | 0.061763928 | 0.595024403 |
| pcaec300.pcaec361                  | -0.005630636 | 0.010570743 | 0.595130296 |
| pcaec445.pcaac425                  | -0.033752528 | 0.063366973 | 0.595137574 |
| smc240.pcaac422                    | -0.014093727 | 0.026463062 | 0.595186343 |
| pcaec425.c3                        | -0.011667324 | 0.02190807  | 0.59520212  |
| c4.pcaac341                        | -0.002941185 | 0.005523071 | 0.595223614 |
| pcaac402.pcaac364                  | 0.025546369  | 0.047974871 | 0.595245946 |
| pcaac360.lysopcac161               | 0.032457495  | 0.060957237 | 0.595267653 |
| c18.spermidine                     | -0.031564695 | 0.059293084 | 0.59534568  |
| pcaec301.lysopcac203               | 0.008993038  | 0.016893194 | 0.595348144 |
| pcaec365.pcaec446                  | -0.036307933 | 0.06821259  | 0.595396952 |
| pcaec383.smc181                    | 0.002121309  | 0.003985366 | 0.595397963 |
| methionine.c182                    | 0.024896261  | 0.046780535 | 0.595454543 |
| methioninesulfoxide.pcaac420       | -0.045732404 | 0.08593812  | 0.595480576 |
| pcaac385.c182                      | 0.010331045  | 0.019416819 | 0.595541505 |
| kynurenine.threonine               | 0.007676358  | 0.014431026 | 0.595633041 |
| lysopcac160.c2                     | -0.03847573  | 0.072335354 | 0.595651437 |
| c142.serine                        | 0.007186129  | 0.013511101 | 0.595678486 |

|                                    |              |             |             |
|------------------------------------|--------------|-------------|-------------|
| pcaac363.pcaec444                  | -0.038860045 | 0.073063703 | 0.595680743 |
| smohc221.pcaec406                  | 0.002787039  | 0.005240807 | 0.595728744 |
| ornithine.c182                     | 0.017660299  | 0.033211271 | 0.595756073 |
| glycine.asymmetricdimethylarginine | -0.006681161 | 0.012564637 | 0.595765    |
| pcaec342.pcaec301                  | -0.020045132 | 0.037700362 | 0.595797654 |
| smc180.c16                         | 0.022346946  | 0.042030745 | 0.59580807  |
| pcaec444.pcaac361                  | 0.015196394  | 0.028582353 | 0.595815272 |
| pcaec424.pcaac344                  | 0.029812921  | 0.056080643 | 0.595858424 |
| lysopcac203.spermidine             | -0.03360823  | 0.063230463 | 0.595919536 |
| citruline.smc241                   | 0.002387301  | 0.004492952 | 0.596041126 |
| pcaac240.c5                        | -0.008499623 | 0.01600035  | 0.596130112 |
| smc181.pcaec365                    | 0.023363502  | 0.043984799 | 0.596159572 |
| pcaec362.c12                       | 0.021655732  | 0.040771925 | 0.596179595 |
| c8.pcaac383                        | 0.002543258  | 0.004788583 | 0.596203439 |
| lysopcac170.pcaec341               | 0.015640597  | 0.029452444 | 0.596246922 |
| lysopcac203.pcaec443               | 0.035664994  | 0.067161651 | 0.596256374 |
| methionine.pcaac281                | 0.002909172  | 0.00547928  | 0.596319659 |
| pcaac240.lysopcac281               | 0.020522732  | 0.038666023 | 0.596438129 |
| pcaec300.pcaac300                  | 0.043472015  | 0.081914577 | 0.59648635  |
| pcaec443.c0                        | -0.001007102 | 0.0018982   | 0.596585044 |
| glutamine.pcaec405                 | -0.030669339 | 0.057810004 | 0.596610632 |
| pcaec405.c8                        | 0.019038183  | 0.035892665 | 0.596679552 |
| putrescine.c51                     | -0.046150617 | 0.087018334 | 0.596724337 |
| lysopcac160.valine                 | -0.016749309 | 0.031583281 | 0.59674722  |
| pcaec340.alanine                   | -0.008024125 | 0.015133263 | 0.596810153 |
| lysopcac180.c182                   | 0.014641783  | 0.027614625 | 0.596818821 |
| lysopcac204.lysopcac281            | 0.008595547  | 0.016212972 | 0.596855917 |
| lysopcac140.pcaac360               | -0.021503362 | 0.040583865 | 0.597073552 |
| pcaac402.c51                       | -0.044138482 | 0.083315481 | 0.597125247 |
| serotonin.isoleucine               | -0.006320072 | 0.011930389 | 0.597145743 |
| c141.asparticacid                  | 0.014611269  | 0.027585583 | 0.597197727 |
| smc180.pcaac385                    | -0.006465878 | 0.01220984  | 0.597272136 |
| glutamine.pcaec361                 | -0.002675764 | 0.005052867 | 0.597278484 |
| c12.pcaec446                       | -0.017596983 | 0.03324193  | 0.597411736 |
| pcaac300.pcaac360                  | -0.013628036 | 0.025751122 | 0.597508579 |
| alanine.c4                         | -0.004393852 | 0.008302991 | 0.59753066  |
| pcaec343.serine                    | -0.007021032 | 0.013267901 | 0.597540934 |
| pcaac421.pcaec406                  | -0.009576244 | 0.018097733 | 0.597564273 |
| lysopcac180.glutamicacid           | -0.018144077 | 0.03429899  | 0.597663282 |
| asymmetricdimethylarginine.c12     | 0.013366935  | 0.02527594  | 0.597772013 |
| pcaac401.pcaac366                  | -0.018572559 | 0.035120132 | 0.597779521 |
| pcaec406.pcaac322                  | 0.025463501  | 0.04815709  | 0.597828149 |
| phenylalanine.pcaec443             | -0.041168945 | 0.077861664 | 0.597838113 |
| citruline.smc181                   | -0.007200785 | 0.013623742 | 0.597975069 |
| pcaec446.tryptophan                | 0.001369726  | 0.002591501 | 0.597975822 |

|                                    |              |             |             |
|------------------------------------|--------------|-------------|-------------|
| lysopcac180.pcaac321               | -0.018218125 | 0.034468999 | 0.597982186 |
| pcaec446.pcaec406                  | 0.001853728  | 0.003507858 | 0.59804205  |
| pcaac404.pcaac281                  | 0.001708885  | 0.003234322 | 0.598104741 |
| pcaec362.smohc241                  | 0.051764915  | 0.097976346 | 0.598117532 |
| smc202.pcaac361                    | -0.019811579 | 0.037503338 | 0.598172337 |
| lysopcac181.c101                   | -0.003738481 | 0.007077086 | 0.59817948  |
| pcaec443.smc240                    | 0.018020853  | 0.034118505 | 0.598226066 |
| serine.lysopcac170                 | -0.016310724 | 0.030881133 | 0.598230557 |
| lysopcac280.c8                     | -0.019369882 | 0.036678918 | 0.598289092 |
| lysopcac160.pcaac422               | -0.024254318 | 0.045936093 | 0.598352595 |
| isoleucine.pcaec406                | 0.015457213  | 0.029275641 | 0.598361211 |
| pcaac321.pcaec420                  | -0.029072092 | 0.055065672 | 0.598385976 |
| smc180.asparticacid                | 0.012058033  | 0.022846469 | 0.598502041 |
| methioninesulfoxide.pcaac321       | 0.008384921  | 0.015887589 | 0.598515838 |
| smohc161.lysopcac180               | 0.033457081  | 0.06339603  | 0.598528472 |
| pcaac403.pcaec401                  | 0.027040923  | 0.051246538 | 0.598586524 |
| pcaec404.pcaec406                  | 0.013646811  | 0.025862808 | 0.598587753 |
| pcaac385.tryptophan                | -0.003386001 | 0.006417883 | 0.598638426 |
| pcaec405.lysopcac180               | 0.030484667  | 0.057793966 | 0.598719425 |
| lysine.c51dc                       | -0.055532354 | 0.105284422 | 0.598733708 |
| pcaec343.pcaac380                  | -0.032896572 | 0.062374154 | 0.598763974 |
| pcaac344.lysopcac280               | 0.002885547  | 0.005471281 | 0.598769728 |
| methioninesulfoxide.pcaec402       | -0.068485537 | 0.129859404 | 0.598781227 |
| pcaec445.smohc241                  | 0.031893664  | 0.060478115 | 0.598797443 |
| smohc221.pcaec446                  | -0.009567568 | 0.018143053 | 0.598810025 |
| prolinr.pcaac406                   | 0.013144745  | 0.024928882 | 0.598845202 |
| c102.pcaac385                      | 0.001508135  | 0.002860336 | 0.598867095 |
| pcaec383.ornithine                 | 0.020412567  | 0.038717155 | 0.598891597 |
| leucine.pcaac424                   | 0.005400635  | 0.010244366 | 0.598920518 |
| c101.smohc222                      | -0.001549698 | 0.002939755 | 0.598940573 |
| methionine.threonine               | 0.011020958  | 0.020907636 | 0.598958635 |
| pcaec342.smc202                    | -0.024835643 | 0.047115324 | 0.598959651 |
| pcaac424.pcaec406                  | 0.024373919  | 0.046259456 | 0.599117973 |
| pcaec420.c3                        | 0.01009106   | 0.019155632 | 0.59918899  |
| pcaec365.tryptophan                | 0.001485598  | 0.002820386 | 0.599228979 |
| pcaec386.smc261                    | 0.030167226  | 0.057276857 | 0.599259664 |
| smc202.c2                          | 0.023134488  | 0.043926429 | 0.599278313 |
| c181.lysopcac181                   | -0.01962911  | 0.03727137  | 0.599285658 |
| pcaac424.smc241                    | 0.010542279  | 0.020018967 | 0.599312875 |
| pcaac300.c4                        | -0.005332478 | 0.010126975 | 0.599349448 |
| pcaac281.transhydroxyproline       | -0.01447321  | 0.027486935 | 0.599358487 |
| pcaac425.pcaec342                  | -0.041900586 | 0.079576748 | 0.599362373 |
| c101.pcaec322                      | -0.026612056 | 0.050555865 | 0.59946905  |
| asymmetricdimethylarginine.pcaac36 | -0.031453281 | 0.059760791 | 0.599517136 |
| c51.lysopcac160                    | 0.017452856  | 0.033174603 | 0.599675669 |

|                                   |              |             |             |
|-----------------------------------|--------------|-------------|-------------|
| pcaec420.c102                     | -0.01201957  | 0.022853067 | 0.599773324 |
| pcaec444.c51                      | -0.026086186 | 0.049604531 | 0.59981963  |
| pcaac386.c141oh                   | 0.035526786  | 0.067564886 | 0.599865243 |
| pcaac300.pcaec386                 | 0.004384652  | 0.008339046 | 0.59987878  |
| methioninesulfoxide.h1            | 0.002317569  | 0.004408159 | 0.599915233 |
| pcaac344.pcaac343                 | -0.014186757 | 0.026984612 | 0.599922245 |
| pcaec342.putrescine               | 0.013400448  | 0.025489538 | 0.599930292 |
| smohc222.isoleucine               | 0.011514524  | 0.021905334 | 0.599981671 |
| pcaec446.c101                     | -0.011330357 | 0.021556491 | 0.600007318 |
| serine.c162                       | 0.034272782  | 0.065222399 | 0.600102033 |
| methionine.smc260                 | 0.008828464  | 0.016802477 | 0.600136211 |
| pcaac322.acetylmethionine         | 0.003665854  | 0.00697759  | 0.600171541 |
| pcaec364.valine                   | -0.026769671 | 0.050960223 | 0.600220161 |
| pcaac341.pcaac364                 | 0.033022979  | 0.062875385 | 0.600283987 |
| c5.c141oh                         | -0.078244521 | 0.148984749 | 0.600303665 |
| pcaac426.h1                       | -0.001664353 | 0.003169115 | 0.600307675 |
| pcaec363.tryptophan               | 0.000823148  | 0.001567407 | 0.600317269 |
| alphaaminoadipicacid.lysine       | 0.039800887  | 0.07581602  | 0.600454832 |
| lysopcac203.c0                    | -0.001085585 | 0.002067931 | 0.600458238 |
| lysine.taurine                    | -0.015717838 | 0.029943089 | 0.600484644 |
| lysopcac281.prolinr               | 0.014979035  | 0.028535953 | 0.600488622 |
| glutamine.smc181                  | -0.005327227 | 0.010148982 | 0.600499331 |
| c3.pcaac385                       | 0.035462842  | 0.067587328 | 0.60064211  |
| pcaac384.lysopcac160              | 0.010584566  | 0.020173209 | 0.600650632 |
| c0.smc240                         | 0.031646609  | 0.060316451 | 0.600656232 |
| lysine.pcaec420                   | -0.02261374  | 0.043109916 | 0.600736808 |
| pcaec444.pcaac402                 | -0.040933905 | 0.078043105 | 0.600775821 |
| arginine.pcaac321                 | 0.00797552   | 0.015206006 | 0.600779816 |
| h1.pcaac366                       | 0.010734365  | 0.020469168 | 0.600836509 |
| arginine.pcaac344                 | 0.033824667  | 0.064510978 | 0.600900372 |
| c12.serine                        | 0.007788166  | 0.014856042 | 0.600957136 |
| pcaec364.tryptophan               | 0.00119205   | 0.002273971 | 0.600976028 |
| asymmetricdimethylarginine.serine | 0.005513179  | 0.010518129 | 0.601014455 |
| pcaec340.pcaec446                 | -0.018961054 | 0.036176538 | 0.601038029 |
| pcaec380.c162                     | 0.027329032  | 0.052144368 | 0.601053627 |
| lysopcac182.pcaec362              | -0.008248638 | 0.015738904 | 0.601061246 |
| pcaec385.smohc141                 | -0.023202907 | 0.044278594 | 0.601110768 |
| pcaec403.c51                      | -0.039509548 | 0.075401944 | 0.601135083 |
| methioninesulfoxide.smc241        | 0.008907835  | 0.017000679 | 0.601146465 |
| lysopcac180.pcaec361              | 0.002251609  | 0.004297374 | 0.601160009 |
| pcaac366.smc240                   | 0.019306695  | 0.036851003 | 0.60118605  |
| phenylalanine.c5                  | -0.01442052  | 0.027530441 | 0.601262081 |
| pcaec365.pcaec422                 | -0.014335975 | 0.027370588 | 0.6012827   |
| c0.asparticacid                   | 0.010392251  | 0.019841413 | 0.601287809 |
| pcaac385.pcaec406                 | 0.003754148  | 0.007167847 | 0.601299826 |

|                               |              |             |             |
|-------------------------------|--------------|-------------|-------------|
| c12.pcaec402                  | -0.023857442 | 0.045551984 | 0.601304895 |
| c12.smc240                    | 0.014151775  | 0.027023042 | 0.601338272 |
| c3.smc241                     | 0.022749825  | 0.043448635 | 0.601400821 |
| pcaec361.taurine              | 0.033415444  | 0.063832528 | 0.601481729 |
| smc181.creatinine             | 0.004792389  | 0.009155509 | 0.601494884 |
| methionine.pcaac422           | -0.011444367 | 0.021869196 | 0.601603998 |
| c51.histidine                 | 0.028613467  | 0.054688699 | 0.60167597  |
| methionine.pcaac425           | 0.001068229  | 0.002041847 | 0.601702374 |
| pcaac420.smc160               | -0.020186623 | 0.038592261 | 0.60176747  |
| pcaac322.pcaac381             | 0.02967312   | 0.056736225 | 0.601818177 |
| c2.pcaac361                   | -0.020885235 | 0.039940107 | 0.601878877 |
| c142.arginine                 | 0.012184275  | 0.02330985  | 0.60202088  |
| pcaec341.smc181               | 0.011340417  | 0.02169727  | 0.602051168 |
| pcaac420.glutamine            | -0.006240579 | 0.011940532 | 0.602070186 |
| pcaac322.pcaac364             | 0.027005859  | 0.051673002 | 0.602075926 |
| pcaac344.c12                  | 0.02273468   | 0.043501628 | 0.602085086 |
| pcaec385.alphaaminoadipicacid | 0.000874033  | 0.001672434 | 0.602088854 |
| lysopcac180.c8                | 0.02048168   | 0.039192753 | 0.602104743 |
| c0.h1                         | -0.002460086 | 0.00470797  | 0.602140827 |
| lysopcac203.lysopcac140       | -0.001389652 | 0.002659862 | 0.602199086 |
| pcaac281.pcaac383             | 0.002803814  | 0.00536668  | 0.602201868 |
| lysine.pcaac366               | -0.006086177 | 0.011649356 | 0.602202609 |
| pcaac426.smc241               | 0.004510823  | 0.008637524 | 0.602349663 |
| lysopcac281.smc161            | -0.029689031 | 0.056855785 | 0.602387362 |
| lysopcac161.pcaac362          | -0.002422927 | 0.004640074 | 0.602392343 |
| pcaac361.c2                   | -0.029288596 | 0.056092262 | 0.602408875 |
| c51.pcaec383                  | 0.026406844  | 0.05057875  | 0.602448275 |
| c102.pcaec365                 | -0.01172366  | 0.022457936 | 0.602494213 |
| pcaec445.pcaec386             | -0.002319384 | 0.004443207 | 0.602508572 |
| pcaac424.transhydroxyproline  | 0.023366368  | 0.04478702  | 0.602706439 |
| pcaac321.smc180               | -0.005004374 | 0.009595117 | 0.602822858 |
| pcaac426.pcaec365             | -0.012862607 | 0.024664376 | 0.602856745 |
| pcaac405.pcaac343             | -0.01094635  | 0.020991429 | 0.602883031 |
| smc181.methioninesulfoxide    | 0.004663091  | 0.008942861 | 0.602908024 |
| c102.methioninesulfoxide      | 0.007290074  | 0.013983433 | 0.602974091 |
| pcaec364.methionine           | -0.010774939 | 0.020669288 | 0.602998147 |
| pcaec444.pcaec406             | 0.001048354  | 0.002011595 | 0.603099849 |
| serotonin.lysopcac203         | -0.005361877 | 0.010295957 | 0.603364189 |
| pcaac386.creatinine           | -0.009988797 | 0.019182379 | 0.603397054 |
| pcaac384.alphaaminoadipicacid | 0.000738518  | 0.001418339 | 0.603421815 |
| methioninesulfoxide.pcaac342  | -0.015371804 | 0.029526628 | 0.603480119 |
| pcaec365.pcaec402             | 0.014946259  | 0.028710156 | 0.603491813 |
| pcaac404.pcaac425             | -0.026155751 | 0.050250741 | 0.603551972 |
| putrescine.pcaac322           | 0.01802979   | 0.034644208 | 0.603605844 |
| smc241.methioninesulfoxide    | 0.004772028  | 0.009169978 | 0.603626965 |

|                               |              |             |             |
|-------------------------------|--------------|-------------|-------------|
| c51.c16                       | 0.016445926  | 0.031604213 | 0.603644725 |
| lysopcac204.pcaec301          | 0.014389697  | 0.027653967 | 0.603660663 |
| pcaec424.pcaac321             | 0.005156014  | 0.00990899  | 0.603668606 |
| pcaec363.asparagine           | 0.006882294  | 0.013226788 | 0.60367348  |
| c141oh.c182                   | 0.018643117  | 0.035830802 | 0.603687483 |
| c181.alanine                  | -0.012956683 | 0.024904975 | 0.603732673 |
| pcaac425.alphaaminoadipicacid | -0.001235687 | 0.002375243 | 0.603738677 |
| pcaec363.h1                   | -0.00221633  | 0.004260331 | 0.603746506 |
| pcaec421.pcaac402             | -0.086748518 | 0.166764474 | 0.603773635 |
| pcaac403.lysopcac181          | 0.028127844  | 0.05407911  | 0.60381661  |
| c142.pcaec322                 | -0.023410235 | 0.045012756 | 0.603847197 |
| c5.pcaec425                   | 0.005158042  | 0.009918443 | 0.603871151 |
| lysopcac140.pcaec380          | -0.021166853 | 0.04070263  | 0.603877436 |
| pcaac363.smc181               | 0.0070161    | 0.013491968 | 0.603888564 |
| glycine.pcaec340              | 0.012491103  | 0.024024949 | 0.603956926 |
| pcaec300.pcaec406             | 0.001414179  | 0.00271999  | 0.603957913 |
| putrescine.ornithine          | -0.019293551 | 0.037112725 | 0.603997699 |
| pcaec405.c142                 | 0.022316912  | 0.042928705 | 0.604000198 |
| ornithine.smohc141            | -0.011210054 | 0.021564037 | 0.604007422 |
| pcaac386.smc240               | 0.012384634  | 0.023824343 | 0.604020226 |
| pcaac405.h1                   | -0.000706807 | 0.001359751 | 0.604037593 |
| pcaec362.serotonin            | 0.052247841  | 0.100525968 | 0.604080273 |
| serine.pcaac381               | 0.013691812  | 0.026344165 | 0.60409158  |
| c51dc.pcaec406                | -0.001954133 | 0.003760487 | 0.604146833 |
| smohc222.c18                  | -0.013548445 | 0.026074835 | 0.604181941 |
| pcaac240.pcaac366             | -0.005665814 | 0.010905031 | 0.604208969 |
| methionine.pcaac380           | 0.022376695  | 0.043070687 | 0.604226632 |
| pcaac386.pcaec421             | 0.001244107  | 0.002394963 | 0.604272517 |
| c181.pcaec425                 | -0.002890801 | 0.00556512  | 0.604285307 |
| arginine.c16                  | 0.012887487  | 0.024814446 | 0.604351795 |
| pcaac404.serine               | -0.015205431 | 0.02928319  | 0.604421049 |
| pcaac401.spermidine           | -0.026508375 | 0.051051825 | 0.604428143 |
| c102.tryptophan               | -0.00372279  | 0.007169988 | 0.604446227 |
| serine.pcaac383               | -0.003291385 | 0.006339795 | 0.604484943 |
| methioninesulfoxide.pcaac363  | -0.00916164  | 0.017648989 | 0.604526628 |
| pcaac424.h1                   | 0.001374237  | 0.002647902 | 0.60460445  |
| smc241.asparagine             | -0.003586334 | 0.006910868 | 0.604638972 |
| c51dc.pcaec421                | 0.000575463  | 0.001108948 | 0.604649102 |
| lysopcac161.phenylalanine     | -0.017784565 | 0.034273142 | 0.604662957 |
| pcaec360.pcaac406             | -0.032675107 | 0.062982711 | 0.604740797 |
| pcaac403.pcaec420             | 0.026224186  | 0.050554527 | 0.604785402 |
| pcaac381.threonine            | -0.018073118 | 0.034846639 | 0.604843378 |
| pcaac343.pcaac323             | -0.035202266 | 0.067874913 | 0.6048524   |
| pcaac420.pcaec386             | -0.002482518 | 0.004786905 | 0.604872017 |
| pcaac343.pcaac362             | -0.003266473 | 0.006298963 | 0.604895031 |



|                              |              |             |             |
|------------------------------|--------------|-------------|-------------|
| smc260.glycine               | -0.017056956 | 0.032894416 | 0.604920503 |
| glutamicacid.lysine          | 0.064398914  | 0.124207625 | 0.604961244 |
| c102.pcaec363                | -0.010396615 | 0.020061714 | 0.605132584 |
| pcaac381.pcaac342            | 0.012060041  | 0.023272316 | 0.605144846 |
| pcaac341.pcaac362            | -0.002229627 | 0.004302527 | 0.605145359 |
| c141oh.kynurenine            | -0.002172217 | 0.004191964 | 0.605164425 |
| pcaac344.c4                  | -0.00858021  | 0.016558207 | 0.605165251 |
| pcaac340.c182                | 0.011598197  | 0.022383791 | 0.605188306 |
| prolinr.pcaec421             | 0.003688687  | 0.007120197 | 0.605252226 |
| pcaec423.serine              | -0.010287844 | 0.019862862 | 0.605332962 |
| pcaac384.pcaec341            | 0.025165972  | 0.048591566 | 0.605357639 |
| pcaec420.smc161              | -0.04280994  | 0.082660591 | 0.605363201 |
| citruiline.smc161            | 0.023162663  | 0.044725188 | 0.60537133  |
| pcaec425.pcaac424            | -0.005447525 | 0.010518796 | 0.605373884 |
| pcaac361.smc181              | -0.012460155 | 0.024060051 | 0.605379145 |
| glutamicacid.lysopcac170     | -0.005847552 | 0.011292443 | 0.605412929 |
| pcaac321.smohc241            | -0.016377986 | 0.031629303 | 0.605425622 |
| glycine.pcaac362             | -0.015579041 | 0.030097279 | 0.605556197 |
| c0.methioninesulfoxide       | 0.007479578  | 0.014451448 | 0.605595815 |
| pcaac323.pcaac360            | 0.018307143  | 0.035381367 | 0.605695146 |
| smc161.pcaec380              | 0.015850284  | 0.030635392 | 0.605721979 |
| pcaec405.pcaec421            | -0.00139629  | 0.00269903  | 0.605759785 |
| lysine.pcaac361              | -0.020464598 | 0.039560996 | 0.605786333 |
| lysopcac203.pcaec423         | 0.012331495  | 0.023842846 | 0.605851296 |
| c5.lysopcac140               | 0.001706351  | 0.003299413 | 0.605872884 |
| smc202.lysopcac161           | 0.031612068  | 0.061132483 | 0.605914942 |
| phenylalanine.pcaec421       | 0.000706915  | 0.001367588 | 0.60605497  |
| pcaec382.transhydroxyproline | 0.031610128  | 0.061157841 | 0.606086301 |
| pcaac380.pcaac322            | 0.025370866  | 0.04908782  | 0.606096713 |
| pcaac344.leucine             | 0.003203135  | 0.006197575 | 0.606103431 |
| smc161.pcaac380              | -0.024967399 | 0.048318196 | 0.606178698 |
| c0.lysopcac203               | 0.006972026  | 0.013493658 | 0.606206266 |
| pcaec422.tryptophan          | -0.001826168 | 0.003534599 | 0.606230037 |
| lysopcac280.pcaac360         | 0.026314738  | 0.050941412 | 0.606290126 |
| c141.pcaac385                | 0.002647967  | 0.005126825 | 0.606343144 |
| pcaec422.alanine             | -0.008721733 | 0.016886849 | 0.606351345 |
| lysopcac170.histidine        | 0.01941195   | 0.037586956 | 0.606369691 |
| kynurenine.pcaac384          | 0.016873787  | 0.03267263  | 0.60637263  |
| c4.lysopcac181               | -0.025226373 | 0.048846536 | 0.606378768 |
| pcaec424.smc241              | 0.007492818  | 0.014510805 | 0.606434542 |
| asparticacid.pcaec406        | -0.00327478  | 0.006342959 | 0.606487094 |
| smc202.leucine               | 0.010423134  | 0.020190075 | 0.606511806 |
| smohc221.pcaac424            | 0.003535367  | 0.006848245 | 0.606516132 |
| pcaac383.methioninesulfoxide | 0.008932742  | 0.017304196 | 0.606534179 |
| pcaec401.tyrosine            | 0.024716904  | 0.047886187 | 0.606575191 |

|                           |              |             |             |
|---------------------------|--------------|-------------|-------------|
| pcaec385.pcaec406         | 0.014718688  | 0.028516804 | 0.606588082 |
| pcaac363.valine           | 0.025037678  | 0.048526002 | 0.606711159 |
| pcaac343.pcaac360         | -0.018684485 | 0.036213138 | 0.606714948 |
| pcaac344.c141oh           | 0.030593417  | 0.059302254 | 0.606763092 |
| smc181.c51dc              | -0.048093931 | 0.093232103 | 0.606789558 |
| pcaec322.smc241           | -0.018409171 | 0.035697208 | 0.606892824 |
| c101.pcaec406             | -0.00132899  | 0.002577612 | 0.606972115 |
| pcaec424.pcaec406         | 0.002119263  | 0.004110387 | 0.606973799 |
| pcaec363.smc202           | -0.026502651 | 0.051406158 | 0.606996895 |
| asparagine.pcaec343       | -0.029568266 | 0.057360014 | 0.607044507 |
| pcaac406.c102             | 0.012153881  | 0.023581134 | 0.607099344 |
| lysopcac140.tryptophan    | -0.001012294 | 0.001964074 | 0.607100482 |
| pcaac385.pcaec444         | -0.037213496 | 0.072222346 | 0.607199735 |
| pcaec385.pcaec382         | -0.009721667 | 0.018873177 | 0.607309803 |
| c18.pcaac380              | 0.026884086  | 0.052206088 | 0.607410304 |
| pcaec385.pcaac342         | 0.014267785  | 0.027707158 | 0.607418205 |
| c10.smohc222              | -0.001180778 | 0.002293025 | 0.60742228  |
| pcaec360.acetylmethionine | 0.006641552  | 0.012898802 | 0.607454852 |
| pcaac300.smc260           | -0.01209462  | 0.023489593 | 0.607457739 |
| pcaec425.pcaec383         | 0.034790435  | 0.067569937 | 0.607466316 |
| smohc241.pcaac406         | 0.024951563  | 0.048471499 | 0.60754484  |
| glutamine.pcaac380        | -0.028308094 | 0.054992513 | 0.607548345 |
| smohc141.pcaec360         | -0.003900415 | 0.00757873  | 0.607624927 |
| smc160.pcaec343           | 0.032013605  | 0.062225739 | 0.607748688 |
| pcaac281.pcaac362         | 0.002171763  | 0.004222012 | 0.607807803 |
| pcaac365.glutamicacid     | -0.020521281 | 0.039905152 | 0.607904768 |
| pcaac424.c51dc            | -0.057975971 | 0.112772196 | 0.608011662 |
| pcaac363.phenylalanine    | -0.019382767 | 0.037708471 | 0.608068728 |
| glycine.smc180            | 0.011433785  | 0.022245118 | 0.608086506 |
| pcaac366.pcaec383         | 0.052328874  | 0.101816966 | 0.608114621 |
| smc260.pcaac366           | -0.004093851 | 0.007965878 | 0.608133502 |
| c51.pcaec444              | 0.032640031  | 0.063519845 | 0.608180725 |
| pcaec360.pcaec301         | -0.02508996  | 0.048831691 | 0.608216134 |
| lysopcac180.c102          | 0.014145221  | 0.027530686 | 0.608220676 |
| lysopcac182.c51dc         | 0.054361913  | 0.105811006 | 0.608244451 |
| c2.alanine                | -0.022371661 | 0.043545431 | 0.608251259 |
| pcaac320.pcaac342         | 0.006463009  | 0.012580415 | 0.608264295 |
| pcaec386.lysopcac140      | 0.000581584  | 0.00113222  | 0.608312053 |
| pcaac381.pcaec406         | -0.007373071 | 0.014354644 | 0.60833345  |
| ornithine.pcaec361        | -0.006850744 | 0.013338078 | 0.608342917 |
| pcaac381.histidine        | -0.028075761 | 0.054666552 | 0.608371518 |
| c182.pcaec384             | -0.003843159 | 0.007484957 | 0.60846291  |
| pcaec380.c51dc            | -0.056302021 | 0.109671298 | 0.608519004 |
| pcaac362.threonine        | 0.012424915  | 0.024204173 | 0.608541935 |
| c141.pcaec402             | -0.018247355 | 0.035556107 | 0.608638787 |

|                                    |              |             |             |
|------------------------------------|--------------|-------------|-------------|
| smc260.glutamine                   | 0.011718487  | 0.022837474 | 0.608690084 |
| pcaec383.pcaec341                  | -0.017387253 | 0.033896386 | 0.608810329 |
| pcaac421.pcaac381                  | 0.024036673  | 0.046861911 | 0.608829455 |
| pcaec301.threonine                 | -0.009477722 | 0.018478185 | 0.608837456 |
| pcaec382.pcaac360                  | -0.032922358 | 0.06418719  | 0.608839172 |
| c182.lysopcac203                   | -0.007198306 | 0.014037381 | 0.608920201 |
| pcaec382.ornithine                 | 0.015790051  | 0.030795579 | 0.608960607 |
| c162.pcaec364                      | -0.007092132 | 0.013832004 | 0.608963467 |
| c162.pcaec380                      | -0.024326351 | 0.047453551 | 0.609032201 |
| pcaec406.pcaec383                  | 0.035313459  | 0.068898112 | 0.609094234 |
| smc181.alphaaminoadipicacid        | 0.003624827  | 0.007072964 | 0.609133073 |
| pcaac401.methionine                | -0.024743446 | 0.048292015 | 0.609216172 |
| pcaec425.pcaac342                  | 0.00345103   | 0.006735832 | 0.609238698 |
| pcaac363.pcaac320                  | -0.013952973 | 0.02723443  | 0.609246135 |
| pcaec405.smc241                    | 0.010836783  | 0.021152209 | 0.609249276 |
| glycine.methionine                 | 0.011097824  | 0.021665942 | 0.609318728 |
| smohc222.pcaac385                  | -0.008299948 | 0.016213166 | 0.609526739 |
| pcaac362.c2                        | -0.029826729 | 0.058266826 | 0.60954588  |
| pcaec404.asparagine                | 0.005836299  | 0.011404575 | 0.609649388 |
| pcaec340.c18                       | 0.013288524  | 0.025971715 | 0.609717114 |
| pcaac424.pcaec405                  | 0.046318781  | 0.090535616 | 0.609748739 |
| c12.taurine                        | -0.009939981 | 0.019430169 | 0.609772322 |
| leucine.lysopcac281                | -0.00547114  | 0.01069514  | 0.609786813 |
| creatinine.tryptophan              | 0.001464986  | 0.002863805 | 0.609787955 |
| asymmetricdimethylarginine.pcaec38 | 0.003896721  | 0.007617949 | 0.609811586 |
| c51.pcaac383                       | -0.001405376 | 0.002747614 | 0.60983173  |
| pcaac406.pcaec362                  | -0.00666384  | 0.013031673 | 0.609924135 |
| pcaac365.pcaac341                  | -0.014084689 | 0.027549588 | 0.609999927 |
| pcaac322.pcaec401                  | -0.012572475 | 0.024591895 | 0.610002691 |
| pcaec321.pcaec341                  | 0.030089471  | 0.058856619 | 0.610010543 |
| isoleucine.serotonin               | 0.041865033  | 0.081906143 | 0.610079828 |
| pcaec362.tryptophan                | 0.001124253  | 0.00219999  | 0.610155182 |
| c141.smc241                        | -0.012129447 | 0.0237401   | 0.610224849 |
| pcaac421.pcaec425                  | -0.002707682 | 0.005299565 | 0.610225759 |
| pcaac300.pcaac323                  | -0.01501218  | 0.029395731 | 0.610388303 |
| serine.glutamine                   | -0.00504762  | 0.009884657 | 0.61041662  |
| pcaec300.prolinr                   | 0.014358764  | 0.028119076 | 0.610424024 |
| pcaec342.tryptophan                | 0.000663362  | 0.001299227 | 0.610465479 |
| pcaac323.smc180                    | 0.005522276  | 0.010816766 | 0.610502288 |
| pcaac320.c12                       | 0.015012073  | 0.029405571 | 0.61051022  |
| pcaec445.pcaec446                  | 0.060809259  | 0.119117637 | 0.610524518 |
| c8.pcaec380                        | -0.03250903  | 0.063682048 | 0.610529982 |
| lysine.pcaec384                    | 0.005633224  | 0.011035992 | 0.610563931 |
| methionine.lysopcac182             | -0.00912536  | 0.017881524 | 0.610646172 |
| pcaac405.alphaaminoadipicacid      | 0.000800744  | 0.001569101 | 0.610648156 |

|                                    |              |             |             |
|------------------------------------|--------------|-------------|-------------|
| pcaec381.kynurenine                | 0.005217531  | 0.01022482  | 0.610675845 |
| c5.pcaac366                        | -0.023345301 | 0.045769122 | 0.610825555 |
| asparticacid.phenylalanine         | -0.032983074 | 0.064667617 | 0.610844135 |
| pcaec406.pcaec425                  | -0.001684484 | 0.00330322  | 0.610905439 |
| pcaec422.pcaec406                  | 0.003467972  | 0.006800991 | 0.610926932 |
| methioninesulfoxide.pcaec405       | 0.051361185  | 0.100726375 | 0.610936392 |
| pcaec340.lysopcac182               | -0.007209091 | 0.014138389 | 0.610945605 |
| pcaac321.c101                      | -0.001940849 | 0.00380669  | 0.610975326 |
| c141.pcaec385                      | -0.023155478 | 0.045420336 | 0.611008935 |
| pcaec443.smc241                    | 0.005182572  | 0.010167996 | 0.611085567 |
| spermidine.acetylnithoine          | -0.053612717 | 0.10521982  | 0.611200141 |
| putrescine.tryptophan              | 0.000918246  | 0.001802385 | 0.611248452 |
| pcaac342.pcaec301                  | 0.029233739  | 0.057385198 | 0.611270465 |
| pcaec362.h1                        | 0.000649641  | 0.001275462 | 0.61133462  |
| c141oh.pcaec322                    | -0.016586341 | 0.032570328 | 0.611398369 |
| lysopcac204.pcaec425               | 0.00201158   | 0.003950222 | 0.611408706 |
| smc180.lysopcac140                 | -0.000361458 | 0.000709815 | 0.611411174 |
| smohc222.pcaec401                  | 0.031730342  | 0.062326714 | 0.61150322  |
| isoleucine.kynurenine              | -0.003111607 | 0.006112237 | 0.611516294 |
| pcaac343.smc161                    | -0.02383213  | 0.046818229 | 0.61154635  |
| pcaac422.pcaac344                  | -0.020450382 | 0.040190901 | 0.611689071 |
| pcaec364.pcaec425                  | 0.002714014  | 0.005334347 | 0.611724189 |
| pcaac380.threonine                 | 0.011496623  | 0.022603743 | 0.611839578 |
| pcaec300.acetylnithoine            | 0.004657583  | 0.009158603 | 0.611887532 |
| pcaac321.putrescine                | 0.015957271  | 0.031385801 | 0.611974276 |
| alanine.pcaec386                   | 0.004766286  | 0.009374917 | 0.611984721 |
| lysopcac182.histidine              | 0.017633021  | 0.034704765 | 0.612209817 |
| pcaec365.pcaec425                  | -0.015888916 | 0.031274827 | 0.612241119 |
| pcaac366.pcaac240                  | -0.010138398 | 0.019956994 | 0.612261701 |
| smc202.asymmetricdimethylarginine  | 0.008452445  | 0.016640027 | 0.612299233 |
| pcaac320.pcaac426                  | 0.022218758  | 0.043747448 | 0.612349364 |
| lysopcac160.pcaec364               | 0.004394855  | 0.008653594 | 0.612364944 |
| citruiline.lysopcac182             | -0.009623958 | 0.018950926 | 0.612385161 |
| pcaac422.pcaec365                  | -0.012001527 | 0.023633018 | 0.612390054 |
| ornithine.lysopcac160              | 0.004199848  | 0.008272938 | 0.612507451 |
| asparagine.glutamine               | 0.014124279  | 0.027825804 | 0.612552583 |
| pcaec360.pcaec365                  | -0.013539525 | 0.026674358 | 0.612560039 |
| lysine.pcaac424                    | 0.004949317  | 0.009751715 | 0.61259699  |
| smc181.putrescine                  | 0.013156252  | 0.025925659 | 0.612647581 |
| pcaec421.lysopcac161               | 0.038154808  | 0.07518984  | 0.612657603 |
| pcaec444.asymmetricdimethylarginir | 0.008607266  | 0.01696204  | 0.612660036 |
| pcaec300.smc161                    | -0.036221889 | 0.071383788 | 0.612672811 |
| pcaec361.serine                    | -0.010724624 | 0.021138835 | 0.612730414 |
| lysopcac204.pcaec383               | 0.041828995  | 0.082456056 | 0.612768145 |
| c3.tryptophan                      | 0.000552202  | 0.001088559 | 0.612775161 |

|                               |              |             |             |
|-------------------------------|--------------|-------------|-------------|
| pcaac300.pcaec404             | 0.006735879  | 0.01328003  | 0.612816896 |
| pcaec322.lysopcac181          | 0.022209245  | 0.043786715 | 0.612819995 |
| pcaec360.tryptophan           | 0.000741886  | 0.001462799 | 0.612851851 |
| kynurenine.pcaac300           | 0.017497425  | 0.034512766 | 0.612981017 |
| c181.spermidine               | 0.0296388    | 0.05846517  | 0.613006311 |
| pcaec340.pcaac320             | 0.038078285  | 0.075124941 | 0.613063623 |
| glycine.c141                  | 0.017586173  | 0.034696578 | 0.61307059  |
| pcaac426.pcaac380             | -0.021486981 | 0.042393105 | 0.613074304 |
| smc161.pcaac360               | -0.017888647 | 0.035295665 | 0.613093939 |
| pcaec425.taurine              | -0.022037269 | 0.043482042 | 0.6131007   |
| pcaec364.smohc241             | 0.026293582  | 0.051891232 | 0.613175895 |
| pcaec341.lysopcac203          | 0.006924807  | 0.013666818 | 0.613188548 |
| pcaac360.ornithine            | -0.008960722 | 0.017686557 | 0.613221664 |
| c5.smc241                     | 0.015905583  | 0.031399635 | 0.613282666 |
| pcaac426.pcaec384             | 0.007318454  | 0.014448188 | 0.613298195 |
| c14.pcaec365                  | -0.009667802 | 0.019086637 | 0.613304446 |
| c51.phenylalanine             | 0.018929588  | 0.037375285 | 0.613338467 |
| c0.pcaac424                   | 0.002411983  | 0.004762622 | 0.613361735 |
| c14.serine                    | 0.007847879  | 0.015496597 | 0.613371681 |
| pcaec401.pcaac360             | -0.013613274 | 0.02688114  | 0.613372552 |
| kynurenine.pcaec383           | 0.033960959  | 0.067063412 | 0.61338936  |
| pcaac403.c14                  | 0.02708166   | 0.053478795 | 0.613389879 |
| lysopcac281.pcaec384          | 0.013829564  | 0.027310616 | 0.613403479 |
| lysopcac180.pcaac424          | -0.002902064 | 0.005732328 | 0.613485973 |
| lysopcac203.glutamicacid      | -0.019980705 | 0.039467772 | 0.613492286 |
| pcaec425.pcaec386             | -0.002001021 | 0.003953596 | 0.613581058 |
| ornithine.pcaac422            | -0.010231244 | 0.020217214 | 0.613623709 |
| smohc222.pcaac366             | 0.004496322  | 0.008885208 | 0.613637829 |
| glycine.pcaec385              | 0.018724706  | 0.037004799 | 0.613664635 |
| c142.c162                     | -0.049892603 | 0.098639161 | 0.613803429 |
| lysopcac203.pcaec421          | 0.001385152  | 0.002738498 | 0.613804973 |
| c12.pcaac424                  | 0.003325806  | 0.006576192 | 0.613855905 |
| c102.threonine                | 0.01316186   | 0.026026357 | 0.613871031 |
| pcaac424.pcaac364             | 0.023671604  | 0.046812655 | 0.61390322  |
| alphaaminoadipicacid.pcaec421 | 0.001123706  | 0.002222313 | 0.613916961 |
| pcaac360.smc241               | 0.041925331  | 0.082916676 | 0.613927516 |
| pcaec321.tryptophan           | 0.000517382  | 0.001023251 | 0.613932298 |
| methionine.tyrosine           | -0.026313417 | 0.052047487 | 0.613974105 |
| pcaec404.c8                   | 0.015207008  | 0.030090058 | 0.614101863 |
| pcaec406.c142                 | 0.026295902  | 0.052050013 | 0.614226957 |
| pcaac385.pcaac366             | 0.002469751  | 0.004888662 | 0.614230256 |
| pcaec340.glutamicacid         | -0.016948799 | 0.033552454 | 0.614269807 |
| lysopcac203.pcaec342          | 0.043654349  | 0.086422739 | 0.614282153 |
| c141.smc180                   | -0.00573309  | 0.011350398 | 0.61429996  |
| pcaac426.lysopcac203          | -0.013648323 | 0.027022207 | 0.614315576 |

|                                    |              |             |             |
|------------------------------------|--------------|-------------|-------------|
| c18.pcaac404                       | 0.002031968  | 0.004023496 | 0.614352342 |
| pcaec405.smohc141                  | -0.008245625 | 0.016328514 | 0.614382005 |
| lysopcac161.h1                     | -0.001305363 | 0.002584992 | 0.614385959 |
| smohc141.c12                       | 0.027551957  | 0.054563217 | 0.614401905 |
| pcaec425.smc161                    | -0.025362826 | 0.050228793 | 0.614408079 |
| smc180.pcaec446                    | -0.010000843 | 0.019807912 | 0.614446336 |
| putrescine.pcaac362                | -0.001636867 | 0.003242183 | 0.61446435  |
| pcaac420.pcaec425                  | -0.001848364 | 0.003662887 | 0.614636794 |
| pcaec405.putrescine                | -0.031435459 | 0.062297913 | 0.614651228 |
| smohc241.methionine                | 0.012454075  | 0.024683621 | 0.614686798 |
| lysopcac140.pcaac380               | -0.01757055  | 0.034825671 | 0.61470044  |
| pcaac381.pcaac344                  | 0.036692088  | 0.072731468 | 0.614729558 |
| pcaec383.threonine                 | -0.010133823 | 0.020089533 | 0.614767486 |
| pcaac401.asparagine                | -0.007096797 | 0.014070996 | 0.614821135 |
| pcaec445.threonine                 | 0.008244435  | 0.016347754 | 0.61484942  |
| lysopcac180.pcaec386               | 0.004019978  | 0.007971545 | 0.614867034 |
| pcaec340.pcaec404                  | -0.011667917 | 0.023143622 | 0.614963974 |
| pcaec385.pcaec422                  | -0.014540054 | 0.028842889 | 0.61499225  |
| lysopcac203.smc240                 | 0.021374394  | 0.042400752 | 0.614997942 |
| c2.c51dc                           | 0.041874656  | 0.083086668 | 0.615079562 |
| pcaac403.smc241                    | 0.015172674  | 0.030105428 | 0.615081663 |
| pcaec322.tryptophan                | 0.000884048  | 0.00175421  | 0.615100378 |
| c51dc.pcaec385                     | -0.02734547  | 0.054261765 | 0.615102692 |
| pcaec403.pcaec401                  | -0.031798914 | 0.063104063 | 0.615132376 |
| lysine.c16                         | 0.022157555  | 0.043978308 | 0.615190643 |
| c4.pcaac366                        | 0.010042644  | 0.019935389 | 0.615239387 |
| pcaec362.smc160                    | 0.050876635  | 0.100997828 | 0.615253233 |
| c3.pcaac384                        | -0.015350356 | 0.030476913 | 0.615301087 |
| pcaec363.histidine                 | 0.027861306  | 0.055328199 | 0.615376317 |
| pcaec402.phenylalanine             | -0.020786729 | 0.041299709 | 0.615551674 |
| lysopcac170.smc241                 | 0.009592811  | 0.019064126 | 0.615641169 |
| glutamine.lysine                   | -0.032515441 | 0.064637482 | 0.61574172  |
| lysopcac170.pcaec322               | 0.027795094  | 0.055255287 | 0.615750592 |
| pcaac402.methionine                | -0.017604904 | 0.03500405  | 0.615814694 |
| glutamicacid.pcaac364              | 0.03457195   | 0.068753767 | 0.615886151 |
| c5.glutamicacid                    | 0.025276671  | 0.050269399 | 0.615895234 |
| pcaec406.lysopcac140               | 0.000912891  | 0.001815602 | 0.615909958 |
| asparagine.asymmetricdimethylargin | -0.00613118  | 0.012197868 | 0.616021913 |
| c162.isoleucine                    | -0.007472175 | 0.014867057 | 0.616052849 |
| pcaec382.c102                      | -0.018720488 | 0.037253022 | 0.616106719 |
| lysopcac281.pcaac385               | 0.019506278  | 0.038820438 | 0.616140542 |
| pcaac384.asymmetricdimethylarginir | -0.006351675 | 0.012644293 | 0.616238132 |
| asparticacid.serine                | 0.011200954  | 0.022311731 | 0.616458766 |
| asymmetricdimethylarginine.kynurer | 0.002181208  | 0.004345468 | 0.616508476 |
| pcaec403.c8                        | 0.017281816  | 0.034434373 | 0.616559752 |

|                          |              |             |             |
|--------------------------|--------------|-------------|-------------|
| glycine.pcaac240         | -0.004984785 | 0.009933783 | 0.616612789 |
| pcaec425.putrescine      | -0.021659132 | 0.04317494  | 0.616712065 |
| pcaec405.lysopcac281     | 0.007289184  | 0.014530725 | 0.616726423 |
| pcaec341.threonine       | 0.011183455  | 0.022298051 | 0.616793286 |
| pcaec321.c51             | -0.022744769 | 0.0453511   | 0.616805753 |
| lysopcac160.pcaac384     | 0.023999145  | 0.047854451 | 0.616822183 |
| pcaac380.pcaac342        | 0.008297753  | 0.016545827 | 0.616823318 |
| pcaac424.pcaac421        | 0.013797286  | 0.027513284 | 0.616840156 |
| c101.smc261              | 0.016216961  | 0.032339934 | 0.616857093 |
| pcaac425.arginine        | -0.01398281  | 0.027885473 | 0.616868353 |
| alanine.pcaec340         | -0.025960003 | 0.051781428 | 0.616937815 |
| lysopcac180.smc180       | 0.003645496  | 0.007272333 | 0.616976593 |
| c142.lysopcac180         | -0.014389099 | 0.028706388 | 0.616999107 |
| pcaac361.c16             | 0.014814304  | 0.029556733 | 0.617023586 |
| lysopcac180.pcaac404     | 0.002001979  | 0.00399453  | 0.617048747 |
| acetylmethionine.prolinr | -0.017420459 | 0.03476222  | 0.617082508 |
| smohc161.pcaac360        | 0.024305624  | 0.048503384 | 0.617096572 |
| pcaec343.tryptophan      | 0.000852345  | 0.001700935 | 0.617102364 |
| pcaac406.smc241          | 0.006458093  | 0.012888007 | 0.617109648 |
| pcaac425.pcaac364        | 0.026706881  | 0.053297679 | 0.617112647 |
| lysopcac170.pcaec384     | -0.012178126 | 0.024304009 | 0.617122638 |
| pcaec363.pcaec341        | -0.040456195 | 0.08074022  | 0.617128659 |
| putrescine.serine        | -0.006687614 | 0.013349457 | 0.61719951  |
| pcaec301.pcaec402        | 0.014985835  | 0.02991499  | 0.61721208  |
| c51dc.pcaec420           | 0.025603021  | 0.051109222 | 0.617212188 |
| smohc222.pcaec384        | 0.013302581  | 0.026556358 | 0.617232066 |
| c141oh.lysopcac160       | 0.005749996  | 0.011482848 | 0.617353069 |
| pcaec363.c162            | -0.039210419 | 0.078314194 | 0.617399152 |
| pcaec425.alanine         | -0.005411619 | 0.010809469 | 0.617429987 |
| c51dc.pcaac344           | -0.018968009 | 0.037888471 | 0.617436642 |
| pcaec421.c102            | -0.01588843  | 0.031748504 | 0.617563653 |
| pcaac363.asparticacid    | 0.011256889  | 0.022495316 | 0.617589076 |
| pcaac424.pcaac365        | 0.026572773  | 0.053104499 | 0.617605839 |
| c8.pcaac281              | -0.012965353 | 0.025910925 | 0.617609189 |
| pcaec360.tyrosine        | -0.025748625 | 0.051464263 | 0.617652184 |
| glycine.serine           | -0.011383216 | 0.022752297 | 0.617659116 |
| pcaac383.pcaec444        | 0.038077276  | 0.076111519 | 0.617678714 |
| smc202.pcaac362          | 0.001961751  | 0.003921406 | 0.617689555 |
| smc202.pcaac381          | 0.017377438  | 0.03473839  | 0.617710602 |
| smc240.pcaac401          | -0.00855635  | 0.017106624 | 0.617752502 |
| pcaec300.tryptophan      | 0.000656769  | 0.001313246 | 0.617799311 |
| pcaec385.pcaac361        | 0.031576974  | 0.063145659 | 0.617831141 |
| pcaec321.pcaac360        | -0.026426926 | 0.052849555 | 0.617848683 |
| pcaec300.lysopcac182     | -0.007975875 | 0.015951409 | 0.617869733 |
| serotonin.smc160         | 0.036415374  | 0.072829753 | 0.617872439 |

|                               |              |             |             |
|-------------------------------|--------------|-------------|-------------|
| lysopcac182.pcaec422          | 0.009061791  | 0.018124096 | 0.617887184 |
| ornithine.pcaec386            | 0.003159897  | 0.006321046 | 0.617946763 |
| c16.asparticacid              | 0.011444125  | 0.022895499 | 0.617988406 |
| pcaec360.c12                  | 0.020036424  | 0.040090415 | 0.618031118 |
| kynurenine.c51dc              | 0.048129297  | 0.096304531 | 0.618044735 |
| arginine.valine               | 0.017200736  | 0.034423962 | 0.618106666 |
| pcaac420.c8                   | 0.015969373  | 0.031960594 | 0.618117285 |
| pcaec384.serotonin            | 0.04550247   | 0.091080833 | 0.618169856 |
| pcaac385.alphaaminoadipicacid | 0.00057004   | 0.001141128 | 0.618199812 |
| citruline.pcaec380            | 0.015662414  | 0.031356724 | 0.618234457 |
| pcaac321.tryptophan           | 0.000888756  | 0.001779365 | 0.618243074 |
| pcaec403.putrescine           | -0.033058279 | 0.066197076 | 0.618304408 |
| c51.pcaac365                  | -0.016487505 | 0.033016682 | 0.618320494 |
| lysopcac280.smc261            | -0.024504198 | 0.049076391 | 0.618363825 |
| c18.pcaac385                  | -0.016394582 | 0.032836763 | 0.618386332 |
| pcaec364.c4                   | 0.013909176  | 0.027861924 | 0.618426493 |
| pcaec446.pcaec403             | -0.011680837 | 0.023398706 | 0.618433091 |
| pcaac421.pcaec445             | 0.023306159  | 0.046692864 | 0.618483094 |
| pcaac360.c8                   | -0.022997639 | 0.046077648 | 0.618505087 |
| c101.pcaec384                 | -0.008070995 | 0.01617213  | 0.61853182  |
| pcaec445.pcaac360             | -0.019225014 | 0.038525668 | 0.618566817 |
| pcaec402.isoleucine           | -0.011610138 | 0.023268368 | 0.618603175 |
| pcaec444.pcaac365             | 0.023521569  | 0.047142734 | 0.618619268 |
| pcaec342.pcaac240             | -0.006015472 | 0.0120566   | 0.618624657 |
| lysopcac180.pcaac320          | -0.014645321 | 0.029353146 | 0.618625156 |
| pcaac365.c3                   | 0.010633623  | 0.021312967 | 0.618630698 |
| histidine.c4                  | -0.005397522 | 0.010819713 | 0.61867807  |
| pcaac380.pcaec403             | -0.010406043 | 0.020862009 | 0.618717789 |
| lysopcac180.smohc141          | -0.012562382 | 0.025186338 | 0.61873594  |
| lysine.pcaec406               | -0.004288036 | 0.008598744 | 0.618803381 |
| pcaec341.tryptophan           | 0.000561902  | 0.001126819 | 0.618816704 |
| pcaec443.h1                   | 0.001044913  | 0.002095781 | 0.618875327 |
| pcaec363.c182                 | 0.020163857  | 0.040451853 | 0.618955246 |
| pcaac281.pcaac363             | 0.004783113  | 0.00959699  | 0.619003282 |
| pcaac361.lysopcac281          | -0.010692593 | 0.021455723 | 0.619032113 |
| kynurenine.tryptophan         | 0.001084146  | 0.002175732 | 0.619078439 |
| pcaec343.pcaac425             | 0.037325837  | 0.074909358 | 0.619085667 |
| pcaac380.pcaec406             | -0.007583839 | 0.0152205   | 0.619096403 |
| pcaac281.pcaec363             | 0.01280611   | 0.025704459 | 0.619137853 |
| pcaec401.pcaec421             | -0.003270441 | 0.00656525  | 0.619181146 |
| pcaec443.c8                   | -0.01992192  | 0.039993241 | 0.619189602 |
| c162.lysopcac182              | -0.029785329 | 0.059799033 | 0.619218902 |
| c14.pcaec425                  | -0.00409728  | 0.008226996 | 0.619262355 |
| pcaac343.c4                   | -0.005887807 | 0.011825566 | 0.619361262 |
| pcaac363.tryptophan           | 0.002387587  | 0.00479545  | 0.619362674 |



|                                    |              |             |             |
|------------------------------------|--------------|-------------|-------------|
| arginine.pcaac402                  | -0.019221032 | 0.038605728 | 0.619366645 |
| serotonin.pcaac366                 | 0.000799298  | 0.001605537 | 0.619396221 |
| pcaec446.pcaec386                  | -0.002039773 | 0.004097585 | 0.619424049 |
| pcaac365.smohc221                  | 0.023371773  | 0.046951275 | 0.619431681 |
| c3.alphaaminoadipicacid            | 0.001220372  | 0.002451676 | 0.619443988 |
| pcaac362.smohc141                  | 0.009723018  | 0.019535976 | 0.619494772 |
| pcaac364.pcaec423                  | 0.005310083  | 0.010669579 | 0.619504399 |
| pcaec420.pcaec380                  | -0.026036207 | 0.05231503  | 0.619506646 |
| pcaec341.lysopcac140               | -0.000363842 | 0.000731378 | 0.61965164  |
| c4.alphaaminoadipicacid            | 0.001444334  | 0.002903532 | 0.619676139 |
| pcaec382.pcaec340                  | -0.022414557 | 0.045074154 | 0.619787482 |
| smc181.smc202                      | -0.025428944 | 0.051137909 | 0.619801348 |
| smc260.c5                          | -0.004285851 | 0.008624409 | 0.620024887 |
| glycine.lysine                     | -0.023825221 | 0.04794522  | 0.620037803 |
| leucine.lysopcac140                | 0.000697151  | 0.001403061 | 0.620070885 |
| pcaac365.histidine                 | 0.029712016  | 0.059799421 | 0.620083262 |
| lysopcac140.lysopcac280            | 0.002465556  | 0.004962292 | 0.620085367 |
| pcaec361.pcaec384                  | -0.016908848 | 0.034043912 | 0.620212467 |
| pcaec404.methionine                | -0.020439612 | 0.041156564 | 0.620245465 |
| pcaec401.asparagine                | -0.004608341 | 0.009279437 | 0.620253987 |
| c182.pcaac362                      | 0.002932585  | 0.00590551  | 0.620277991 |
| pcaec421.pcaac363                  | -0.007322565 | 0.014747711 | 0.620321832 |
| pcaec386.tryptophan                | 0.00097046   | 0.001954657 | 0.62034704  |
| asymmetricdimethylarginine.pcaac36 | 0.002586937  | 0.005211938 | 0.620444045 |
| glutamine.c18                      | -0.028923704 | 0.058274573 | 0.620453554 |
| pcaac403.lysopcac281               | 0.006954071  | 0.014013471 | 0.620519027 |
| creatinine.pcaec420                | -0.025858454 | 0.05211597  | 0.620568589 |
| pcaac321.pcaec423                  | 0.004169327  | 0.008405338 | 0.620665828 |
| pcaec322.pcaac363                  | 0.002661982  | 0.005367141 | 0.620704898 |
| alanine.lysopcac280                | -0.008642452 | 0.017425352 | 0.620710299 |
| c142.pcaec425                      | -0.00603116  | 0.012160352 | 0.6207109   |
| pcaac426.lysopcac281               | 0.002822079  | 0.00569096  | 0.620767928 |
| pcaec404.h1                        | 0.001027712  | 0.00207279  | 0.620822191 |
| pcaec422.pcaac240                  | -0.005564538 | 0.011223177 | 0.620824527 |
| smohc241.putrescine                | 0.015240828  | 0.030741952 | 0.620853575 |
| c5.pcaac361                        | -0.042349833 | 0.085439124 | 0.62091961  |
| smc180.c4                          | 0.005580444  | 0.011259869 | 0.620967376 |
| lysopcac182.tryptophan             | -0.000418713 | 0.000845151 | 0.621090068 |
| pcaac380.pcaac363                  | 0.008548726  | 0.017255743 | 0.621102073 |
| kynurenine.pcaac321                | -0.006534283 | 0.013189872 | 0.621110374 |
| pcaac403.smc160                    | -0.026552954 | 0.053602023 | 0.621131018 |
| pcaac363.threonine                 | 0.01247184   | 0.025180526 | 0.621183967 |
| pcaec365.pcaac342                  | -0.00621831  | 0.012557074 | 0.621249655 |
| smc240.pcaec341                    | 0.019619797  | 0.039623019 | 0.621279317 |
| pcaac403.methionine                | -0.019604573 | 0.039597926 | 0.621329063 |

|                              |              |             |             |
|------------------------------|--------------|-------------|-------------|
| ornithine.glycine            | -0.007923324 | 0.01600441  | 0.621342891 |
| serine.lysopcac182           | -0.009927034 | 0.0200577   | 0.62144668  |
| histidine.tryptophan         | -0.000846093 | 0.001710125 | 0.621565617 |
| pcaac341.smc181              | 0.006241633  | 0.012615724 | 0.621568882 |
| alphaaminoadipicacid.taurine | -0.013540728 | 0.027368879 | 0.62156973  |
| pcaac323.acetylmithoine      | 0.008801408  | 0.017792653 | 0.621628723 |
| pcaac380.smohc241            | -0.036093163 | 0.07296743  | 0.621641201 |
| pcaec321.c18                 | -0.010291436 | 0.020807541 | 0.62167385  |
| lysopcac204.c102             | 0.015723289  | 0.03179663  | 0.621748349 |
| pcaec362.pcaac381            | -0.014113765 | 0.028544652 | 0.621783769 |
| citruine.pcaec406            | -0.015312987 | 0.030970623 | 0.621790286 |
| lysopcac161.pcaac366         | -0.003863536 | 0.007814539 | 0.621813005 |
| pcaec402.pcaec301            | 0.02859697   | 0.057849839 | 0.621864138 |
| c3.lysopcac170               | -0.011236032 | 0.022730854 | 0.621880691 |
| pcaac342.methionine          | -0.014174122 | 0.028678088 | 0.621921761 |
| c8.isoleucine                | -0.009793212 | 0.01981441  | 0.621923353 |
| pcaac422.c8                  | 0.017208564  | 0.03481862  | 0.621932103 |
| pcaec360.pcaac322            | 0.016561813  | 0.033511433 | 0.621946683 |
| pcaec300.c182                | 0.011463622  | 0.023199903 | 0.622010161 |
| pcaec443.pcaac384            | 0.01756407   | 0.035552437 | 0.622074185 |
| c162.pcaac405                | -0.019677209 | 0.039836631 | 0.622134188 |
| alanine.tryptophan           | -0.000586317 | 0.001187052 | 0.622148948 |
| spermidine.c182              | 0.073724827  | 0.149284272 | 0.622199227 |
| pcaec321.lysine              | -0.030909297 | 0.062593145 | 0.622229144 |
| pcaec361.valine              | 0.013158694  | 0.026647235 | 0.622230512 |
| alanine.pcaac362             | -0.002644175 | 0.005355741 | 0.62230265  |
| pcaec405.pcaac342            | 0.024154395  | 0.048944006 | 0.622441928 |
| lysopcac180.tryptophan       | -0.00024647  | 0.000499508 | 0.622501312 |
| pcaec364.smc240              | 0.008799081  | 0.017836433 | 0.622575909 |
| citruine.lysine              | -0.02943378  | 0.059677569 | 0.622651439 |
| c141.pcaec343                | 0.035594542  | 0.072178418 | 0.622698544 |
| pcaac363.smc240              | 0.016418021  | 0.033293361 | 0.622708842 |
| glycine.smc241               | 0.004652092  | 0.009436924 | 0.622825084 |
| pcaac424.c8                  | 0.020178492  | 0.040934582 | 0.622840711 |
| prolinr.tryptophan           | -0.00073436  | 0.001489913 | 0.622880968 |
| pcaac381.tryptophan          | 0.015669221  | 0.031792039 | 0.622896162 |
| pcaec424.c18                 | -0.01426549  | 0.028950556 | 0.622975532 |
| acetylmithoine.serine        | 0.021711093  | 0.044061945 | 0.622984936 |
| citruine.c51dc               | -0.047246886 | 0.095902792 | 0.62304578  |
| pcaac362.pcaec380            | 0.021889243  | 0.044436172 | 0.62308403  |
| pcaec401.citruine            | 0.022075197  | 0.044822457 | 0.623152123 |
| lysopcac180.pcaac366         | 0.015995741  | 0.032497076 | 0.623351019 |
| pcaac420.pcaec445            | 0.035158859  | 0.071436973 | 0.623389642 |
| smohc221.pcaac422            | -0.009424829 | 0.019156141 | 0.623506507 |
| creatinine.pcaac381          | -0.027389988 | 0.055672053 | 0.623515167 |

|                                     |              |             |             |
|-------------------------------------|--------------|-------------|-------------|
| pcaec361.c4                         | -0.006826681 | 0.013876778 | 0.623542039 |
| asymmetricdimethylarginine.isoleuci | 0.010191949  | 0.020719406 | 0.62357478  |
| pcaec364.asparagine                 | 0.003999107  | 0.008131141 | 0.623629399 |
| arginine.pcaec403                   | -0.009818557 | 0.019963579 | 0.623631242 |
| isoleucine.pcaec425                 | 0.002032616  | 0.004133269 | 0.623669285 |
| pcaec363.pcaac363                   | 0.011522678  | 0.023432512 | 0.623690885 |
| c4.tryptophan                       | 0.000632403  | 0.001286213 | 0.623733856 |
| pcaec406.pcaec401                   | -0.011732934 | 0.02386351  | 0.623740602 |
| glutamine.pcaec406                  | 0.001283859  | 0.002611548 | 0.623782832 |
| pcaec322.smc181                     | -0.014435086 | 0.029364956 | 0.623806284 |
| pcaec425.h1                         | 0.001372481  | 0.002792257 | 0.62383755  |
| smc261.pcaac343                     | 0.00736969   | 0.014994467 | 0.62386362  |
| pcaac401.lysopcac181                | 0.028626284  | 0.058243564 | 0.62386454  |
| c162.c51                            | -0.030178102 | 0.061405724 | 0.623891658 |
| pcaac341.tryptophan                 | 0.001092649  | 0.00222375  | 0.62396208  |
| pcaec362.pcaec343                   | 0.030222307  | 0.061509412 | 0.623969096 |
| pcaec406.pcaec420                   | 0.01803495   | 0.036707794 | 0.623992532 |
| putrescine.prolinr                  | -0.008093533 | 0.016473837 | 0.624003117 |
| serine.serotonin                    | -0.030139729 | 0.061358321 | 0.624064967 |
| pcaac401.tyrosine                   | -0.020771642 | 0.042287855 | 0.62407351  |
| pcaec362.c182                       | 0.013332128  | 0.027142911 | 0.624083187 |
| pcaec385.c142                       | 0.019483084  | 0.039673955 | 0.624155652 |
| pcaec404.alphaaminoadipicacid       | -0.001663496 | 0.003387475 | 0.624160868 |
| pcaac361.pcaac362                   | -0.003160176 | 0.006435258 | 0.62416111  |
| lysopcac160.tryptophan              | -0.000275678 | 0.000561469 | 0.624216696 |
| pcaec364.glutamicacid               | 0.010929224  | 0.022262569 | 0.624265822 |
| pcaec403.asparagine                 | 0.006356197  | 0.01294781  | 0.62427624  |
| lysopcac280.smc181                  | 0.00270817   | 0.005516713 | 0.624280593 |
| putrescine.pcaac406                 | 0.022399937  | 0.04563363  | 0.624307519 |
| c182.threonine                      | 0.008050931  | 0.016403196 | 0.624342728 |
| c18.lysopcac140                     | -0.000608022 | 0.001238839 | 0.624353425 |
| smc161.smc241                       | 0.068692183  | 0.139963217 | 0.624362033 |
| pcaec420.smc260                     | -0.008965469 | 0.018270282 | 0.624414368 |
| pcaac404.pcaac406                   | 0.018862709  | 0.038453128 | 0.624538216 |
| lysopcac161.pcaac363                | 0.006668278  | 0.013594946 | 0.624567036 |
| pcaac384.tryptophan                 | -0.003640575 | 0.007422753 | 0.624591945 |
| smohc241.smc241                     | 0.026055847  | 0.05315343  | 0.62477604  |
| pcaac321.alanine                    | 0.014005529  | 0.028580788 | 0.624894375 |
| c16.lysopcac181                     | 0.035900528  | 0.073264592 | 0.624909203 |
| smohc161.tryptophan                 | 0.000900216  | 0.001837546 | 0.624987523 |
| c162.pcaec422                       | -0.009286695 | 0.018956705 | 0.624995505 |
| lysopcac182.pcaec361                | 0.002109398  | 0.004307289 | 0.625109942 |
| pcaac365.lysopcac280                | 0.003825122  | 0.007810814 | 0.625114413 |
| pcaac421.pcaec301                   | 0.033274405  | 0.067948621 | 0.625129779 |
| alphaaminoadipicacid.putrescine     | 0.009877496  | 0.020182695 | 0.625338215 |

|                                 |              |             |             |
|---------------------------------|--------------|-------------|-------------|
| serine.tryptophan               | -0.000308938 | 0.000631282 | 0.625353883 |
| pcaac422.tryptophan             | -0.000819192 | 0.001673984 | 0.625364604 |
| lysopcac203.pcaac362            | -0.002851405 | 0.005827363 | 0.625402534 |
| pcaec446.serine                 | -0.005985291 | 0.01223283  | 0.625425235 |
| lysopcac160.smc180              | 0.002392534  | 0.004889916 | 0.625426469 |
| histidine.alphaaminoadipicacid  | 0.010021752  | 0.020483577 | 0.625441535 |
| pcaec321.isoleucine             | -0.010333123 | 0.021121981 | 0.625474042 |
| smc180.pcaec365                 | 0.016955693  | 0.034663668 | 0.625518522 |
| pcaac425.lysopcac204            | 0.02152917   | 0.044017593 | 0.625550372 |
| smc260.pcaac363                 | 0.005536654  | 0.011320661 | 0.625570583 |
| c142.ornithine                  | 0.011254346  | 0.023012442 | 0.625584904 |
| c2.pcaec404                     | 0.011559916  | 0.02363971  | 0.625620708 |
| pcaec403.smc240                 | 0.022993442  | 0.047023095 | 0.625636416 |
| asparticacid.pcaac384           | -0.026612888 | 0.054428505 | 0.625658021 |
| pcaec385.lysopcac182            | 0.015194843  | 0.031080534 | 0.625704018 |
| glutamine.pcaec384              | 0.012020041  | 0.024586772 | 0.625706666 |
| pcaac300.taurine                | 0.009273837  | 0.01897275  | 0.625766463 |
| smohc222.lysine                 | 0.024750046  | 0.050637322 | 0.625785458 |
| smohc241.pcaac425               | 0.03086461   | 0.06315757  | 0.625841009 |
| lysopcac203.smc161              | -0.041235318 | 0.084393103 | 0.625899017 |
| smohc161.c102                   | 0.012569961  | 0.025730068 | 0.625954158 |
| smohc141.pcaac422               | -0.006678411 | 0.013671368 | 0.625979444 |
| c4.histidine                    | 0.025029413  | 0.051239362 | 0.625990741 |
| pcaec360.pcaec444               | 0.054521268  | 0.111626972 | 0.626030575 |
| pcaac300.pcaec402               | 0.012134265  | 0.024849058 | 0.626104654 |
| pcaac381.c51dc                  | -0.052237547 | 0.106986772 | 0.626145036 |
| lysopcac181.tryptophan          | -0.000202913 | 0.000415609 | 0.626167351 |
| putrescine.c51dc                | -0.044258752 | 0.090657935 | 0.626192174 |
| pcaec405.smc260                 | -0.015572149 | 0.031901149 | 0.626232769 |
| c141.c0                         | -0.000529653 | 0.001085122 | 0.626255743 |
| pcaac281.smc180                 | -0.005774617 | 0.011833192 | 0.626328786 |
| lysopcac161.serotonin           | -0.049628561 | 0.101716515 | 0.626393139 |
| pcaec360.pcaec342               | -0.049286467 | 0.101034374 | 0.626457964 |
| pcaec404.smc241                 | 0.013103411  | 0.026864585 | 0.626501065 |
| ornithine.smc241                | 0.004329603  | 0.008878522 | 0.626577875 |
| lysopcac280.h1                  | 0.000622285  | 0.001276375 | 0.626654584 |
| c8.prolinr                      | -0.018975907 | 0.038925986 | 0.626692501 |
| pcaec343.pcaac422               | -0.007043646 | 0.014449907 | 0.626716693 |
| pcaac380.tryptophan             | 0.000779978  | 0.001600128 | 0.626720434 |
| methionine.alphaaminoadipicacid | 0.001263315  | 0.002593673 | 0.626983046 |
| c14.pcaac300                    | -0.015212719 | 0.031233935 | 0.626996044 |
| pcaac364.tryptophan             | 0.001881226  | 0.003862539 | 0.627005575 |
| pcaac403.alphaaminoadipicacid   | -0.00105458  | 0.002165349 | 0.627018597 |
| smc181.pcaac385                 | -0.006743021 | 0.013846455 | 0.627046968 |
| glutamine.pcaac383              | 0.00656227   | 0.013475595 | 0.627054664 |

|                                 |              |             |             |
|---------------------------------|--------------|-------------|-------------|
| pcaac403.pcaac385               | -0.0151421   | 0.03109461  | 0.627058769 |
| pcaac281.pcaec425               | -0.003367314 | 0.006915039 | 0.627068328 |
| pcaac366.arginine               | -0.023490616 | 0.048246372 | 0.627115228 |
| pcaac342.tryptophan             | 0.000794545  | 0.001632057 | 0.627152059 |
| pcaac384.pcaac365               | 0.016873882  | 0.03466437  | 0.627192939 |
| pcaac362.c16                    | -0.016612695 | 0.034127992 | 0.627194769 |
| pcaec405.c141                   | -0.018504626 | 0.038020324 | 0.627246173 |
| methionine.lysopcac140          | 0.000464966  | 0.000955552 | 0.627323369 |
| pcaec321.pcaec363               | -0.015279096 | 0.031403769 | 0.627363885 |
| pcaac383.tryptophan             | 0.0012613    | 0.002592664 | 0.627398492 |
| pcaec340.tryptophan             | 0.000630449  | 0.001296144 | 0.627458278 |
| smohc221.tryptophan             | 0.000946844  | 0.00194663  | 0.627459708 |
| smohc141.tryptophan             | 0.000787303  | 0.001618667 | 0.627467772 |
| pcaac383.transhydroxyproline    | 0.00835939   | 0.017187501 | 0.627485874 |
| c2.serine                       | 0.021387047  | 0.043975574 | 0.627503732 |
| c101.smc241                     | -0.005170572 | 0.010631788 | 0.627509287 |
| smc241.pcaec421                 | 0.002111957  | 0.00434301  | 0.627539426 |
| pcaec384.methionine             | -0.007848101 | 0.016139556 | 0.627556225 |
| pcaec342.pcaac363               | 0.009821387  | 0.020197824 | 0.627559972 |
| smc260.tyrosine                 | -0.042232372 | 0.086853353 | 0.627567394 |
| pcaac402.pcaac422               | 0.069283822  | 0.142502485 | 0.627606572 |
| pcaac426.pcaec360               | -0.001864891 | 0.003835804 | 0.627616373 |
| c14.c12                         | 0.032057931  | 0.065948464 | 0.627668787 |
| smohc241.tryptophan             | 0.000976421  | 0.002008804 | 0.627693689 |
| smc240.kynurenine               | -0.002212814 | 0.004553567 | 0.627777753 |
| alanine.serine                  | -0.004804861 | 0.009888439 | 0.627809437 |
| pcaac366.tryptophan             | -0.015878449 | 0.032679338 | 0.627823886 |
| c4.pcaec423                     | 0.005757027  | 0.011851753 | 0.627918152 |
| c5.pcaec385                     | -0.034903244 | 0.071856482 | 0.627930664 |
| pcaec422.pcaac380               | 0.02493975   | 0.051347372 | 0.627951214 |
| smohc161.pcaec401               | -0.010243624 | 0.02109215  | 0.627983701 |
| asparticacid.pcaec322           | 0.016037732  | 0.033023488 | 0.627993808 |
| pcaec405.pcaac385               | -0.015301674 | 0.031521158 | 0.62813872  |
| lysopcac203.tryptophan          | -0.000278122 | 0.000572942 | 0.628148561 |
| smc202.smohc141                 | -0.012721216 | 0.026206564 | 0.628153145 |
| lysopcac180.pcaac363            | -0.006575495 | 0.013546424 | 0.628164821 |
| pcaec405.h1                     | 0.001137471  | 0.002343712 | 0.628218156 |
| lysopcac204.tryptophan          | -0.000175677 | 0.000362011 | 0.628251926 |
| lysopcac170.tryptophan          | -0.000282707 | 0.000582601 | 0.628273952 |
| pcaac342.threonine              | 0.009331366  | 0.019230807 | 0.628288176 |
| asparagine.alphaaminoadipicacid | 0.000767474  | 0.001581849 | 0.628326754 |
| smc160.pcaac321                 | -0.007143372 | 0.014724845 | 0.628363413 |
| c181.pcaec343                   | 0.020458904  | 0.042174576 | 0.628379914 |
| pcaac386.lysopcac280            | 0.001999079  | 0.004121381 | 0.628415053 |
| pcaac381.pcaec445               | 0.028634454  | 0.059035259 | 0.628422755 |

|                            |              |             |             |
|----------------------------|--------------|-------------|-------------|
| c142.alanine               | 0.014817604  | 0.030550273 | 0.628434238 |
| pcaac403.c182              | -0.023632415 | 0.048731481 | 0.628485119 |
| pcaac406.isoleucine        | 0.013915609  | 0.02869785  | 0.628521171 |
| pcaac320.threonine         | 0.00975486   | 0.020120254 | 0.628572754 |
| pcaac360.pcaac362          | -0.002424573 | 0.005001362 | 0.628604848 |
| smc261.c4                  | 0.0083544    | 0.017234104 | 0.628620937 |
| citruline.c102             | -0.014573922 | 0.030064408 | 0.628623135 |
| pcaac363.pcaac402          | -0.02511777  | 0.051821428 | 0.628664263 |
| pcaac385.c142              | 0.011588219  | 0.023909007 | 0.628677322 |
| pcaac320.tryptophan        | 0.000540421  | 0.001115051 | 0.628691639 |
| asparagine.c12             | 0.037157048  | 0.076667842 | 0.628698808 |
| pcaec362.asparagine        | 0.005335829  | 0.011009956 | 0.628708011 |
| c5.pcaac380                | 0.046143579  | 0.095217323 | 0.628724595 |
| pcaec404.c14               | -0.03115352  | 0.064288474 | 0.628741421 |
| c51dc.c18                  | -0.015928415 | 0.032876004 | 0.628804944 |
| pcaec420.serine            | -0.02034414  | 0.041991173 | 0.628814585 |
| pcaec422.pcaec385          | -0.023889063 | 0.049315651 | 0.628867475 |
| pcaec386.tyrosine          | -0.024306508 | 0.050178315 | 0.628873673 |
| c12.pcaec343               | 0.033315611  | 0.068777967 | 0.628880015 |
| lysopcac182.taurine        | -0.018221601 | 0.037618252 | 0.628888322 |
| c16.pcaec401               | -0.018869763 | 0.038965767 | 0.628970975 |
| pcaac343.tryptophan        | 0.002882795  | 0.005954735 | 0.629075022 |
| pcaac402.pcaec406          | -0.018550501 | 0.038318169 | 0.629075386 |
| pcaec381.pcaec403          | 0.072041517  | 0.148815756 | 0.629088769 |
| c102.pcaac321              | 0.014024533  | 0.028971613 | 0.629103134 |
| pcaac344.lysopcac140       | 0.001064762  | 0.00220026  | 0.629211345 |
| pcaec383.valine            | 0.011019376  | 0.022783005 | 0.629394741 |
| serotonin.pcaec341         | -0.024413123 | 0.05047532  | 0.629396128 |
| pcaac362.pcaec402          | -0.008470761 | 0.017513984 | 0.629401462 |
| spermidine.c101            | -0.002320512 | 0.004798675 | 0.629460606 |
| pcaac341.serine            | -0.010605256 | 0.021937422 | 0.629560647 |
| pcaec406.tryptophan        | 0.000752105  | 0.00155581  | 0.629571409 |
| serotonin.lysopcac281      | -0.007125448 | 0.014740419 | 0.629586794 |
| c101.arginine              | -0.011514668 | 0.023825118 | 0.629654584 |
| pcaac401.smc261            | 0.016915138  | 0.035003738 | 0.6296981   |
| pcaec403.smc241            | 0.008370103  | 0.017321578 | 0.629712135 |
| pcaac420.pcaec362          | 0.00567462   | 0.011744484 | 0.629744    |
| lysopcac203.pcaec401       | -0.022370719 | 0.046310642 | 0.629825722 |
| smc240.methioninesulfoxide | 0.003516097  | 0.007279395 | 0.629852132 |
| smc160.pcaac422            | -0.008419795 | 0.01743337  | 0.629887935 |
| lysopcac204.ornithine      | -0.013352365 | 0.027650938 | 0.62994451  |
| pcaac364.lysopcac170       | 0.003739872  | 0.007747676 | 0.630072904 |
| lysopcac160.pcaac381       | -0.016729159 | 0.034664928 | 0.630152752 |
| putrescine.pcaac380        | 0.016718366  | 0.034650107 | 0.630227187 |
| pcaac386.c101              | -0.003846985 | 0.007973228 | 0.630229505 |

|                                 |              |             |             |
|---------------------------------|--------------|-------------|-------------|
| h1.glutamine                    | 0.002826416  | 0.005858142 | 0.630237434 |
| lysopcac161.tryptophan          | -0.000340065 | 0.000705056 | 0.63034558  |
| pcaec446.pcaec444               | -0.053224201 | 0.110363793 | 0.630389842 |
| pcaac381.pcaec362               | 0.00870496   | 0.018051703 | 0.630416535 |
| pcaec444.smc180                 | -0.005045145 | 0.010463151 | 0.630445999 |
| pcaec341.pcaac381               | 0.012515509  | 0.025956101 | 0.630447647 |
| lysopcac182.methioninesulfoxide | -0.011300196 | 0.02343863  | 0.630491155 |
| pcaec381.pcaac240               | 0.010443923  | 0.021669417 | 0.630599143 |
| pcaac362.c142                   | -0.019385386 | 0.040222008 | 0.630603638 |
| pcaec444.ornithine              | -0.013791051 | 0.028617532 | 0.630639427 |
| pcaec420.smc180                 | 0.003903798  | 0.008100905 | 0.630648361 |
| pcaac424.pcaac384               | 0.019490511  | 0.040445896 | 0.630652346 |
| pcaec406.taurine                | -0.028684429 | 0.0595431   | 0.630757695 |
| methioninesulfoxide.pcaec406    | -0.025576908 | 0.05309258  | 0.630758131 |
| smc241.acetylmethionine         | -0.007495223 | 0.015559065 | 0.630768442 |
| phenylalanine.lysine            | 0.040500728  | 0.084074443 | 0.630770214 |
| pcaec380.c101                   | -0.010128679 | 0.021027128 | 0.63079065  |
| lysopcac170.isoleucine          | 0.012596716  | 0.026152765 | 0.630816652 |
| lysopcac280.pcaac362            | -0.001776887 | 0.003689327 | 0.630838051 |
| pcaec321.c102                   | 0.009945985  | 0.020653389 | 0.63088209  |
| pcaac425.pcaac381               | -0.035824482 | 0.074398623 | 0.630914673 |
| smc160.tryptophan               | 0.000722858  | 0.001501428 | 0.630966941 |
| leucine.pcaec425                | 0.001267598  | 0.002632987 | 0.630979217 |
| smc202.c102                     | 0.011923248  | 0.024776679 | 0.631121723 |
| phenylalanine.tryptophan        | -0.000175259 | 0.000364221 | 0.631148921 |
| pcaac383.pcaac320               | -0.019747563 | 0.041039424 | 0.631152523 |
| c10.pcaec301                    | -0.026200154 | 0.054453708 | 0.631180692 |
| smc180.tryptophan               | 0.000753463  | 0.001566148 | 0.631217641 |
| pcaec380.tryptophan             | -0.002367286 | 0.004920716 | 0.631222988 |
| c4.c182                         | -0.01671932  | 0.034755813 | 0.631247628 |
| smc181.pcaac361                 | -0.016693902 | 0.034716194 | 0.631377474 |
| smohc222.smc241                 | 0.00783634   | 0.016297345 | 0.631400493 |
| pcaac343.pcaec445               | 0.027214937  | 0.056620095 | 0.631525823 |
| pcaac363.pcaec341               | -0.021356455 | 0.044437954 | 0.631574178 |
| smc181.smc240                   | -0.012251817 | 0.025496507 | 0.631617542 |
| pcaec424.c16                    | 0.010669587  | 0.022204229 | 0.631623756 |
| pcaac322.tryptophan             | 0.000763391  | 0.001588874 | 0.631666133 |
| pcaac402.tryptophan             | -0.000498724 | 0.001038029 | 0.631671448 |
| ornithine.tryptophan            | -0.000983371 | 0.002047213 | 0.63174724  |
| smohc161.c4                     | 0.006394371  | 0.01331212  | 0.631750295 |
| lysopcac180.c18                 | -0.0178757   | 0.037228516 | 0.63187834  |
| lysopcac204.putrescine          | -0.010118534 | 0.0210737   | 0.6318866   |
| pcaec321.pcaac425               | -0.041292104 | 0.086005726 | 0.631915717 |
| pcaac383.isoleucine             | 0.016030975  | 0.03339049  | 0.63191767  |
| isoleucine.tryptophan           | -0.000312707 | 0.000651441 | 0.631975929 |

|                                |              |             |             |
|--------------------------------|--------------|-------------|-------------|
| pcaec381.glutamicacid          | -0.036471524 | 0.076001414 | 0.632078303 |
| methioninesulfoxide.pcaac361   | -0.03231269  | 0.067337784 | 0.632092366 |
| c162.smc240                    | -0.011890764 | 0.024780722 | 0.632106858 |
| pcaac381.c102                  | -0.014307112 | 0.029818862 | 0.632134192 |
| c8.pcaac426                    | 0.018458837  | 0.038478446 | 0.632192271 |
| c16.glycine                    | 0.018888348  | 0.03937499  | 0.63220267  |
| lysopcac280.c142               | 0.017515263  | 0.036512871 | 0.632204896 |
| pcaac365.pcaac344              | -0.035797049 | 0.074627245 | 0.632221244 |
| pcaec382.phenylalanine         | -0.029799414 | 0.062124248 | 0.632223787 |
| leucine.tryptophan             | -0.000327401 | 0.000682554 | 0.632226248 |
| pcaec421.tryptophan            | -0.000517935 | 0.001079825 | 0.63224303  |
| smohc221.smc160                | 0.039599299  | 0.082574849 | 0.63230751  |
| smohc241.acetylmethionine      | -0.008500403 | 0.017726294 | 0.63232173  |
| h1.pcaec380                    | -0.024178493 | 0.050435903 | 0.632425211 |
| glutamicacid.c4                | -0.011099452 | 0.023156857 | 0.632478079 |
| c18.glutamine                  | -0.008671958 | 0.018095545 | 0.632537898 |
| smc181.c142                    | -0.026595271 | 0.055496872 | 0.632545406 |
| c8.pcaec406                    | -0.001947647 | 0.004064747 | 0.632591743 |
| pcaec322.serine                | -0.009515374 | 0.019860958 | 0.632631701 |
| smohc222.pcaac422              | -0.00881079  | 0.018394548 | 0.632709938 |
| pcaac381.c162                  | 0.027405209  | 0.057215833 | 0.632716855 |
| lysopcac280.c2                 | -0.039126642 | 0.081688824 | 0.632722303 |
| methioninesulfoxide.c101       | 0.010202811  | 0.021305347 | 0.632783911 |
| methioninesulfoxide.tryptophan | -0.00027123  | 0.000566388 | 0.632789955 |
| pcaac426.threonine             | 0.006218016  | 0.012985407 | 0.632811254 |
| pcaec383.pcaec322              | 0.023439636  | 0.048950702 | 0.632814637 |
| pcaec406.pcaac240              | -0.007380189 | 0.015414415 | 0.63285493  |
| pcaec340.methionine            | -0.013068269 | 0.027307944 | 0.633020271 |
| pcaac323.alphaaminoadipicacid  | 0.002069158  | 0.004324201 | 0.633052473 |
| pcaec362.pcaac281              | -0.00077538  | 0.001620463 | 0.633062415 |
| pcaac281.pcaac342              | 0.001844358  | 0.003854809 | 0.633088038 |
| c8.pcaac420                    | 0.04069903   | 0.085065698 | 0.633098056 |
| pcaac344.pcaec401              | 0.038124426  | 0.079694995 | 0.633142872 |
| histidine.pcaac404             | -0.001940101 | 0.004055735 | 0.633156467 |
| pcaac281.tryptophan            | 0.000670694  | 0.001402075 | 0.633157807 |
| c142.pcaac426                  | 0.02146926   | 0.044886749 | 0.633200206 |
| smc181.c51                     | -0.014550527 | 0.030422963 | 0.633217175 |
| pcaec423.pcaac380              | -0.028743071 | 0.060101678 | 0.63324113  |
| glutamine.pcaac342             | -0.009008227 | 0.018838533 | 0.633283609 |
| pcaac424.pcaec340              | -0.022554282 | 0.047168651 | 0.63329665  |
| lysopcac181.pcaec343           | 0.03358726   | 0.070242453 | 0.633297151 |
| lysopcac182.c102               | -0.014998065 | 0.031372483 | 0.633366367 |
| smohc241.pcaec420              | 0.00610238   | 0.012767084 | 0.633427962 |
| c181.pcaac364                  | 0.015875072  | 0.033215998 | 0.633458532 |
| pcaac403.tryptophan            | -0.000505733 | 0.001058461 | 0.633554143 |



|                               |              |             |             |
|-------------------------------|--------------|-------------|-------------|
| pcaec364.c12                  | 0.017329306  | 0.03627105  | 0.633573635 |
| glutamicacid.tryptophan       | -0.000147599 | 0.000308962 | 0.633606512 |
| pcaec401.smc240               | 0.0095432    | 0.019983125 | 0.633722322 |
| pcaec403.ornithine            | 0.013921276  | 0.029151373 | 0.633730619 |
| pcaec421.c8                   | -0.022047926 | 0.046170388 | 0.633742962 |
| pcaec445.c51                  | -0.028893467 | 0.060508075 | 0.633756935 |
| c162.tryptophan               | 0.00386116   | 0.008086638 | 0.633785457 |
| c8.tryptophan                 | 0.000905446  | 0.001896426 | 0.633803551 |
| smohc222.methioninesulfoxide  | 0.003831003  | 0.008024019 | 0.633808303 |
| methionine.lysopcac180        | -0.020148198 | 0.042201809 | 0.633820316 |
| c162.pcaac363                 | 0.002998492  | 0.006280903 | 0.633839369 |
| pcaac281.lysopcac204          | -0.008145532 | 0.017063586 | 0.633864031 |
| pcaac420.c51                  | -0.027913847 | 0.058476023 | 0.6338697   |
| pcaec421.ornithine            | 0.030881493  | 0.06469533  | 0.633882586 |
| pcaec403.tryptophan           | -0.000354019 | 0.000741741 | 0.633922083 |
| c18.lysine                    | 0.020648815  | 0.04327186  | 0.633988566 |
| pcaac383.pcaac420             | 0.025529163  | 0.053513407 | 0.63407875  |
| c8.pcaec343                   | 0.032513213  | 0.068165627 | 0.634140788 |
| pcaac360.tryptophan           | 0.002701753  | 0.0056649   | 0.634172865 |
| c182.c101                     | -0.003893127 | 0.008163591 | 0.634200956 |
| pcaac420.lysopcac140          | 0.000730211  | 0.001531373 | 0.634239713 |
| smc180.lysine                 | 0.019205306  | 0.04028927  | 0.63434561  |
| pcaec341.pcaec385             | -0.021645822 | 0.045423279 | 0.634451817 |
| smc160.pcaac343               | 0.007972673  | 0.016732913 | 0.634501082 |
| alphaaminoadipicacid.pcaac344 | 0.018518812  | 0.038870912 | 0.634535387 |
| pcaac240.tryptophan           | -0.000721725 | 0.001514928 | 0.634542271 |
| lysopcac180.pcaec380          | 0.015541126  | 0.032623264 | 0.634561352 |
| spermidine.glycine            | 0.06087319   | 0.127784903 | 0.63456802  |
| pcaec386.histidine            | 0.023418402  | 0.049162024 | 0.634582837 |
| pcaac366.pcaec445             | 0.029175715  | 0.061252406 | 0.634605551 |
| kynurenine.pcaac342           | -0.007676035 | 0.016116102 | 0.634622258 |
| c14.c3                        | 0.011702904  | 0.024573166 | 0.634656833 |
| pcaac402.alphaaminoadipicacid | -0.000868594 | 0.001823923 | 0.634674083 |
| pcaac300.tryptophan           | 0.00055696   | 0.001169547 | 0.634677546 |
| smohc221.lysopcac204          | -0.014687187 | 0.030842846 | 0.634694498 |
| lysopcac203.threonine         | 0.008073127  | 0.016955051 | 0.634726853 |
| pcaac320.pcaec382             | -0.004922681 | 0.010340305 | 0.634784771 |
| smc240.pcaec423               | 0.006888592  | 0.014469995 | 0.634789611 |
| c0.lysopcac280                | 0.00091595   | 0.001924257 | 0.634831191 |
| glycine.threonine             | 0.008447751  | 0.017751696 | 0.634914885 |
| serotonin.pcaac422            | 0.020999456  | 0.044137807 | 0.634995831 |
| leucine.pcaec341              | 0.015986035  | 0.033608619 | 0.635079292 |
| smc180.lysopcac204            | 0.010037638  | 0.021107092 | 0.635146982 |
| smohc241.methioninesulfoxide  | 0.003680436  | 0.007739922 | 0.635178393 |
| pcaec446.serotonin            | 0.047463786  | 0.099823526 | 0.635204294 |

|                                 |              |             |             |
|---------------------------------|--------------|-------------|-------------|
| phenylalanine.c51dc             | 0.047294077  | 0.099472031 | 0.635222737 |
| smc260.tryptophan               | 0.000962824  | 0.002025464 | 0.63528778  |
| citruline.smohc241              | -0.013833565 | 0.029107678 | 0.635362176 |
| c10.pcaac420                    | 0.037913449  | 0.079789121 | 0.63542202  |
| pcaac341.pcaac420               | 0.034485195  | 0.072586823 | 0.635480126 |
| c51dc.pcaac405                  | 0.031608472  | 0.06653918  | 0.635518113 |
| c181.lysopcac182                | 0.00867369   | 0.018261628 | 0.635566064 |
| smc161.pcaec340                 | -0.016204841 | 0.034118185 | 0.635570373 |
| c51.alanine                     | -0.00968334  | 0.020387834 | 0.635574081 |
| asparagine.pcaec301             | -0.030645197 | 0.064525704 | 0.635593057 |
| serotonin.pcaac362              | 0.000452139  | 0.000952321 | 0.635702602 |
| lysopcac181.pcaac403            | -0.007530219 | 0.015862882 | 0.635751737 |
| acetylnithoine.threonine        | 0.010973614  | 0.023119413 | 0.635792676 |
| glutamine.pcaec404              | -0.01097266  | 0.023125297 | 0.635907889 |
| pcaec362.glycine                | 0.014987159  | 0.031603847 | 0.63609838  |
| smc240.pcaec406                 | 0.003507559  | 0.007397231 | 0.636132252 |
| putrescine.alphaaminoadipicacid | 0.00127006   | 0.002678651 | 0.636153694 |
| pcaec421.pcaac380               | 0.020928634  | 0.044142562 | 0.63617293  |
| pcaac363.pcaec420               | -0.014512752 | 0.030613194 | 0.636205707 |
| alanine.methionine              | -0.007381764 | 0.015573362 | 0.636254922 |
| lysopcac281.taurine             | 0.01311277   | 0.027665236 | 0.636268632 |
| spermidine.ornithine            | 0.067045164  | 0.141456929 | 0.636281712 |
| lysopcac160.c141                | -0.00985     | 0.02078301  | 0.636293696 |
| pcaac424.alphaaminoadipicacid   | -0.000532919 | 0.001124636 | 0.636354601 |
| c141oh.putrescine               | 0.010229127  | 0.021590345 | 0.636409198 |
| smohc141.pcaec380               | 0.013974694  | 0.029496831 | 0.636418533 |
| glutamine.tryptophan            | 0.000284121  | 0.000599886 | 0.63652095  |
| pcaec361.pcaec363               | 0.0175094    | 0.036970224 | 0.636533195 |
| acetylnithoine.pcaac424         | 0.004567237  | 0.009646552 | 0.636640058 |
| smc160.pcaec365                 | 0.015436623  | 0.032606369 | 0.636664542 |
| pcaec404.lysopcac281            | 0.007336251  | 0.01549725  | 0.63668804  |
| pcaec402.tryptophan             | -0.001241062 | 0.002622445 | 0.636790636 |
| pcaac240.pcaec445               | -0.031041126 | 0.065592486 | 0.636793639 |
| pcaac362.c101                   | -0.018072108 | 0.038188356 | 0.63679793  |
| asparticacid.tryptophan         | -0.000447366 | 0.000945509 | 0.636860512 |
| c10.tryptophan                  | 0.001498087  | 0.003166274 | 0.636867189 |
| c3.histidine                    | 0.025748916  | 0.054423772 | 0.636881295 |
| ornithine.acetylnithoine        | -0.010024976 | 0.021193439 | 0.636949821 |
| smc181.pcaec443                 | 0.035365286  | 0.074770678 | 0.636977763 |
| smc202.methioninesulfoxide      | 0.007887608  | 0.016676537 | 0.636982718 |
| pcaec446.pcaec420               | 0.009816854  | 0.020761709 | 0.63708364  |
| pcaec445.pcaec383               | -0.015620825 | 0.033040352 | 0.637122314 |
| arginine.tryptophan             | -0.000380495 | 0.000804905 | 0.637164699 |
| pcaec321.pcaac363               | 0.003041426  | 0.006434289 | 0.637186278 |
| pcaac426.smohc141               | -0.004514221 | 0.009550852 | 0.637214174 |

|                                  |              |             |             |
|----------------------------------|--------------|-------------|-------------|
| pcaac240.serine                  | -0.010458106 | 0.022132341 | 0.637303269 |
| leucine.pcaec403                 | -0.03214962  | 0.068073079 | 0.637477678 |
| lysopcac281.h1                   | 0.000730652  | 0.001547341 | 0.637536704 |
| pcaac366.pcaac406                | 0.019676817  | 0.04167506  | 0.637571982 |
| pcaec382.tryptophan              | -0.000800619 | 0.001696256 | 0.637683566 |
| pcaec404.tryptophan              | -0.000359813 | 0.000762356 | 0.637695242 |
| pcaec364.isoleucine              | -0.006496509 | 0.013769876 | 0.637826245 |
| lysopcac180.alphaaminoadipicacid | -0.001469476 | 0.00311474  | 0.637833453 |
| h1.alphaaminoadipicacid          | -0.001442617 | 0.003058133 | 0.637869092 |
| prolinr.smc180                   | -0.009101457 | 0.019294463 | 0.637881744 |
| lysopcac160.phenylalanine        | -0.021441832 | 0.045461111 | 0.637925361 |
| c14.glutamicacid                 | -0.017018968 | 0.0360847   | 0.637934428 |
| c182.smc241                      | -0.002086335 | 0.004423921 | 0.637960193 |
| pcaac424.tryptophan              | -0.000636879 | 0.001350471 | 0.637964125 |
| arginine.spermidine              | -0.025555071 | 0.054189494 | 0.637971649 |
| pcaec360.alanine                 | -0.005039443 | 0.010686525 | 0.63798401  |
| pcaac322.pcaac426                | 0.034176094  | 0.072473183 | 0.637984717 |
| pcaac364.lysopcac280             | 0.003037405  | 0.006441072 | 0.637985145 |
| c162.pcaec385                    | -0.023484997 | 0.049808218 | 0.638027692 |
| c10.pcaec406                     | -0.001986937 | 0.004214255 | 0.63804795  |
| ornithine.pcaac363               | 0.005673084  | 0.012034297 | 0.638098067 |
| pcaec425.alphaaminoadipicacid    | -0.00098836  | 0.002096808 | 0.638130374 |
| pcaec403.alphaaminoadipicacid    | -0.000676688 | 0.001435648 | 0.638142787 |
| smc240.pcaec383                  | -0.026851597 | 0.056969933 | 0.638155325 |
| pcaec361.pcaac321                | 0.008622619  | 0.018295388 | 0.638176071 |
| smohc241.ornithine               | -0.009930914 | 0.021071451 | 0.638178218 |
| pcaec446.methionine              | 0.010543676  | 0.022376702 | 0.638254571 |
| pcaac384.pcaec343                | -0.02829127  | 0.060049377 | 0.638294786 |
| smc202.pcaac360                  | 0.018462071  | 0.039198079 | 0.638393901 |
| arginine.methioninesulfoxide     | 0.005057281  | 0.010738026 | 0.638411703 |
| pcaec444.lysopcac280             | 0.003158975  | 0.006707531 | 0.638418758 |
| pcaac404.transhydroxyproline     | 0.010739896  | 0.02280838  | 0.638478865 |
| pcaac380.valine                  | -0.027694833 | 0.058817562 | 0.638489619 |
| smohc222.lysopcac281             | 0.009729328  | 0.020663371 | 0.63849738  |
| pcaec381.tryptophan              | -0.000560106 | 0.001189691 | 0.638532602 |
| leucine.c51dc                    | 0.060553579  | 0.128624123 | 0.638547027 |
| c5.glutamine                     | 0.013915526  | 0.02956275  | 0.638595365 |
| pcaec382.lysopcac203             | 0.006164837  | 0.013098354 | 0.638633876 |
| serine.c141oh                    | -0.04158592  | 0.088365356 | 0.638665239 |
| pcaec341.c12                     | 0.018251576  | 0.038784039 | 0.638678317 |
| pcaac385.pcaec385                | 0.020200463  | 0.042928749 | 0.638704752 |
| c51dc.pcaac361                   | -0.026326761 | 0.055948325 | 0.638706882 |
| pcaec322.alanine                 | -0.004657119 | 0.009899918 | 0.638803044 |
| c14.smc261                       | -0.010453232 | 0.022222442 | 0.638823849 |
| pcaac364.threonine               | 0.010339323  | 0.021982883 | 0.638863461 |

|                                    |              |             |             |
|------------------------------------|--------------|-------------|-------------|
| c8.smc260                          | 0.011134815  | 0.023674768 | 0.638871332 |
| pcaec401.pcaec281                  | -0.000953312 | 0.002027113 | 0.638902295 |
| smc260.pcaec422                    | -0.007382201 | 0.015698208 | 0.638918795 |
| prolinr.pcaac366                   | -0.010465483 | 0.022257831 | 0.638964558 |
| pcaac403.pcaac240                  | -0.009457404 | 0.020118188 | 0.639036566 |
| pcaec422.h1                        | 0.001161357  | 0.002471138 | 0.639124837 |
| c142.pcaec403                      | 0.012201446  | 0.025963177 | 0.639136548 |
| pcaac320.ornithine                 | -0.010136145 | 0.021573914 | 0.639221047 |
| pcaec402.pcaac300                  | -0.01952475  | 0.041564665 | 0.639284785 |
| smc181.pcaec446                    | -0.009683357 | 0.02061555  | 0.639308047 |
| c141oh.serine                      | 0.010644876  | 0.022662683 | 0.639309403 |
| pcaac321.pcaac323                  | -0.013954895 | 0.029710063 | 0.639314244 |
| pcaac425.pcaec425                  | -0.009452074 | 0.020127789 | 0.639385118 |
| pcaac322.lysopcac204               | -0.012856796 | 0.027380548 | 0.639416274 |
| smohc141.lysopcac140               | -0.000299051 | 0.000636958 | 0.639459421 |
| pcaac425.smc241                    | 0.005958604  | 0.012691672 | 0.639466318 |
| alphaaminoadipicacid.c8            | -0.017804242 | 0.037924408 | 0.639482487 |
| c181.asymmetricdimethylarginine    | 0.008378047  | 0.017847553 | 0.639513754 |
| c18.tryptophan                     | 0.001187679  | 0.002530127 | 0.639519389 |
| pcaac425.pcaac344                  | -0.024027813 | 0.051214526 | 0.63970095  |
| pcaac422.pcaec421                  | 0.00321615   | 0.006855279 | 0.639708649 |
| pcaec403.serotonin                 | -0.04148291  | 0.088428563 | 0.639735176 |
| pcaec300.pcaec402                  | 0.011064887  | 0.023588129 | 0.639753    |
| pcaec362.c51                       | 0.029593174  | 0.063087002 | 0.639754432 |
| pcaec321.pcaac281                  | 0.000914403  | 0.001950656 | 0.639981339 |
| pcaac321.pcaec422                  | 0.007107218  | 0.015162724 | 0.640007891 |
| pcaec381.h1                        | 0.001249817  | 0.002666619 | 0.640036435 |
| acetylnithoine.smc241              | -0.008846036 | 0.018875271 | 0.640059358 |
| pcaec383.tryptophan                | -0.000733665 | 0.001565667 | 0.640103465 |
| pcaac240.pcaac362                  | -0.003029792 | 0.006465981 | 0.640118757 |
| phenylalanine.alphaaminoadipicacid | -0.000601378 | 0.001283437 | 0.640123148 |
| pcaec402.c162                      | -0.036088675 | 0.077034314 | 0.64018924  |
| pcaac344.tryptophan                | 0.001440979  | 0.003077115 | 0.640322085 |
| c3.c12                             | -0.012207246 | 0.026075329 | 0.640419046 |
| pcaec421.pcaec402                  | -0.025820847 | 0.055155847 | 0.640425956 |
| c142.pcaac323                      | 0.0301908    | 0.064496496 | 0.640457038 |
| pcaac424.smohc141                  | -0.008031228 | 0.017157337 | 0.640461968 |
| smc240.tryptophan                  | 0.001715322  | 0.003664542 | 0.64046669  |
| spermidine.lysopcac170             | 0.032963025  | 0.070430641 | 0.640513219 |
| pcaec423.pcaac421                  | -0.0262308   | 0.056048426 | 0.640526521 |
| pcaac404.smc181                    | 0.006566319  | 0.014030637 | 0.640529238 |
| pcaac424.pcaec384                  | -0.01449208  | 0.030968993 | 0.64056069  |
| pcaac342.alanine                   | -0.005760101 | 0.012310706 | 0.640604157 |
| c181.pcaec360                      | 0.003048293  | 0.006517243 | 0.640722689 |
| c4.smc260                          | 0.00568793   | 0.01216094  | 0.640727083 |

|                                    |              |             |             |
|------------------------------------|--------------|-------------|-------------|
| creatinine.c141oh                  | 0.0431052    | 0.092172147 | 0.640771004 |
| pcaec382.pcaec364                  | 0.001805886  | 0.003862191 | 0.640827285 |
| smc260.pcaec363                    | -0.009355909 | 0.020010839 | 0.640854943 |
| c141oh.smc181                      | -0.006195976 | 0.013252757 | 0.640868176 |
| pcaac405.lysopcac182               | -0.004344145 | 0.009293458 | 0.640926884 |
| c3.alanine                         | 0.00372072   | 0.007959787 | 0.640928032 |
| histidine.pcaac360                 | -0.00999581  | 0.021386641 | 0.640966514 |
| smc181.pcaec380                    | 0.023150017  | 0.049550116 | 0.641096091 |
| pcaec446.asymmetricdimethylarginir | 0.009470623  | 0.020275312 | 0.641169491 |
| pcaec421.serotonin                 | -0.045670231 | 0.09777426  | 0.641171286 |
| glutamicacid.alphaaminoadipicacid  | -0.000385823 | 0.000826106 | 0.641214498 |
| lysopcac281.tryptophan             | -0.0016692   | 0.003574217 | 0.641233589 |
| glutamicacid.c3                    | 0.022135597  | 0.04740032  | 0.641247035 |
| c51dc.lysopcac203                  | 0.005905423  | 0.012646    | 0.64125633  |
| pcaac321.pcaac362                  | -0.002208426 | 0.004730147 | 0.641325044 |
| c2.tryptophan                      | 0.000386466  | 0.000827912 | 0.641387119 |
| pcaec340.pcaec425                  | -0.001486627 | 0.003185245 | 0.641439422 |
| pcaec381.lysopcac203               | 0.004484632  | 0.009610081 | 0.641484996 |
| pcaec424.pcaec425                  | -0.005578467 | 0.011956038 | 0.641540374 |
| glutamine.c8                       | -0.016129489 | 0.034571413 | 0.641558845 |
| pcaac240.pcaac385                  | -0.015268596 | 0.032727165 | 0.641568644 |
| pcaac386.c16                       | 0.017289596  | 0.037060367 | 0.64158059  |
| pcaac384.c4                        | -0.006299819 | 0.013505943 | 0.641635768 |
| smc160.glycine                     | -0.011393135 | 0.024425385 | 0.641636779 |
| methioninesulfoxide.lysopcac281    | 0.00675918   | 0.01449096  | 0.641640603 |
| arginine.phenylalanine             | 0.016267698  | 0.034876938 | 0.641647581 |
| smc260.pcaac344                    | -0.022671701 | 0.048611687 | 0.641681581 |
| c141oh.pcaac385                    | 0.003096181  | 0.006639524 | 0.641723005 |
| creatinine.serine                  | -0.009179258 | 0.019684997 | 0.641736134 |
| pcaac401.tryptophan                | -0.001216397 | 0.002608607 | 0.641740408 |
| pcaac362.alphaaminoadipicacid      | 0.002912896  | 0.006247124 | 0.641757137 |
| lysopcac160.pcaec342               | -0.040903006 | 0.087726789 | 0.641773882 |
| smc261.smc241                      | -0.044643622 | 0.095762571 | 0.641819381 |
| lysopcac281.pcaec300               | -0.023836458 | 0.051134072 | 0.641844114 |
| pcaac402.pcaec401                  | 0.027743774  | 0.05951623  | 0.641845046 |
| smc261.smohc241                    | -0.024356275 | 0.052250255 | 0.641850925 |
| pcaac344.pcaec365                  | -0.012029303 | 0.025813346 | 0.641947702 |
| pcaec342.asparticacid              | 0.016969628  | 0.036417367 | 0.641972511 |
| c10.ornithine                      | 0.012410387  | 0.026634491 | 0.64199     |
| lysopcac160.pcaac404               | 0.001935996  | 0.00415521  | 0.642012625 |
| pcaac322.smc180                    | -0.0031698   | 0.006805271 | 0.642108332 |
| phenylalanine.ornithine            | -0.023463983 | 0.050378149 | 0.642128946 |
| pcaac384.pcaac362                  | 0.001015382  | 0.002180091 | 0.642132723 |
| pcaec405.alphaaminoadipicacid      | -0.001340348 | 0.002877856 | 0.642137403 |
| pcaac344.glutamicacid              | -0.021604362 | 0.046389637 | 0.642158851 |

|                                   |              |             |             |
|-----------------------------------|--------------|-------------|-------------|
| c16.tryptophan                    | 0.001172291  | 0.002517833 | 0.642244613 |
| c141.glutamine                    | -0.004418821 | 0.009491397 | 0.642269241 |
| pcaec445.pcaec380                 | 0.02032174   | 0.04365427  | 0.6423015   |
| pcaac365.lysopcac182              | -0.005035839 | 0.010818635 | 0.642328123 |
| smc161.pcaac385                   | -0.006111539 | 0.013129777 | 0.642332847 |
| pcaec360.lysopcac204              | -0.010878517 | 0.023373439 | 0.642368154 |
| glycine.taurine                   | -0.012378082 | 0.026597083 | 0.642389376 |
| pcaec423.lysopcac160              | -0.015913586 | 0.034194248 | 0.642392706 |
| pcaec443.c51dc                    | -0.050568298 | 0.108666627 | 0.642417842 |
| pcaec341.pcaac364                 | 0.016742751  | 0.035982232 | 0.642451069 |
| lysopcac161.pcaec443              | 0.034247676  | 0.073612926 | 0.642498276 |
| smc240.pcaec446                   | -0.010130079 | 0.021774791 | 0.642512193 |
| pcaec422.serine                   | -0.010634726 | 0.022861113 | 0.642535082 |
| leucine.pcaac361                  | -0.018584619 | 0.039951573 | 0.642542092 |
| pcaec343.pcaac360                 | 0.017067595  | 0.03669278  | 0.642563549 |
| prolinr.pcaac380                  | -0.020228828 | 0.043507606 | 0.642705961 |
| kynurenine.alanine                | -0.020550902 | 0.044201927 | 0.642718088 |
| c10.c18                           | -0.01201012  | 0.025832788 | 0.64272851  |
| smohc221.pcaec420                 | 0.005573312  | 0.011988933 | 0.642761552 |
| pcaac405.pcaac361                 | -0.05762533  | 0.123963235 | 0.642770965 |
| c142.smc241                       | -0.004470746 | 0.009617855 | 0.642785305 |
| smc180.asymmetricdimethylarginine | 0.007104598  | 0.015284628 | 0.642798426 |
| pcaec380.c12                      | 0.023362527  | 0.050262533 | 0.642805438 |
| c142.lysopcac281                  | 0.004564432  | 0.009821358 | 0.642851514 |
| pcaac342.smc180                   | -0.002722283 | 0.005859301 | 0.642949093 |
| smc261.tryptophan                 | 0.000696192  | 0.001498697 | 0.643004358 |
| pcaac425.pcaac361                 | -0.016109136 | 0.034690999 | 0.643126437 |
| smc161.lysine                     | 0.019435181  | 0.041859284 | 0.643171239 |
| pcaac426.glutamicacid             | -0.024457926 | 0.052679011 | 0.643182519 |
| c3.pcaec383                       | 0.025648234  | 0.05526128  | 0.643293653 |
| serotonin.smc202                  | 0.015209474  | 0.032772249 | 0.643315484 |
| c102.lysopcac182                  | 0.039619364  | 0.085369682 | 0.643318615 |
| smc161.serotonin                  | 0.030346736  | 0.065391599 | 0.643329155 |
| smohc141.taurine                  | 0.021697144  | 0.046762124 | 0.643391534 |
| smohc222.tryptophan               | 0.000699345  | 0.001507419 | 0.643430436 |
| c14.tryptophan                    | 0.000534714  | 0.001152762 | 0.643487858 |
| c2.pcaac300                       | 0.0246192    | 0.053076503 | 0.643495897 |
| pcaac365.pcaec403                 | -0.006605429 | 0.014241988 | 0.643527345 |
| c142.pcaac366                     | 0.003431726  | 0.007399986 | 0.643564584 |
| pcaec444.putrescine               | 0.015656216  | 0.033762625 | 0.643588279 |
| pcaac386.pcaec386                 | 0.005620932  | 0.012123725 | 0.643648055 |
| lysopcac160.pcaac320              | -0.014460863 | 0.03119517  | 0.64369795  |
| isoleucine.c182                   | 0.021656148  | 0.04672054  | 0.643723519 |
| pcaec406.pcaec384                 | 0.012564904  | 0.027108401 | 0.643737306 |
| pcaec424.pcaec386                 | -0.00254561  | 0.005493069 | 0.643797169 |

|                                     |              |             |             |
|-------------------------------------|--------------|-------------|-------------|
| pcaec444.smohc141                   | 0.014890159  | 0.032133765 | 0.643826995 |
| pcaac420.c101                       | 0.011192863  | 0.024155704 | 0.643839381 |
| smohc161.pcaec340                   | 0.032186854  | 0.069472695 | 0.643882916 |
| smc180.c51                          | -0.013749875 | 0.0296796   | 0.643900994 |
| c4.glutamine                        | 0.003989145  | 0.008612369 | 0.643964637 |
| pcaec421.serine                     | 0.034008679  | 0.073423124 | 0.643964883 |
| smc202.pcaac380                     | 0.011901774  | 0.025695471 | 0.643966238 |
| pcaac386.tryptophan                 | 0.000633011  | 0.001366983 | 0.644047732 |
| pcaec404.pcaac360                   | -0.021832066 | 0.047147759 | 0.644058753 |
| leucine.smc240                      | -0.012342104 | 0.026656796 | 0.644098782 |
| smc180.pcaec401                     | -0.00826227  | 0.017845073 | 0.644098955 |
| lysopcac280.pcaac363                | -0.011997952 | 0.025916355 | 0.644135405 |
| lysopcac160.pcaac363                | -0.005134635 | 0.011095107 | 0.644253615 |
| pcaec341.smc180                     | 0.007443604  | 0.016088479 | 0.644337269 |
| pcaac300.pcaec342                   | -0.034955692 | 0.075557678 | 0.644359355 |
| pcaec363.pcaec405                   | -0.023441721 | 0.050672931 | 0.644379044 |
| smohc161.asparagine                 | 0.004052604  | 0.008761714 | 0.644431097 |
| lysopcac182.pcaac300                | -0.015282012 | 0.033043364 | 0.644468305 |
| methioninesulfoxide.lysopcac160     | 0.010500392  | 0.022711434 | 0.644571342 |
| smohc222.lysopcac280                | 0.003436745  | 0.007434062 | 0.644601648 |
| arginine.smc181                     | 0.002751062  | 0.005951759 | 0.644651947 |
| pcaac361.tryptophan                 | 0.001346613  | 0.00291338  | 0.644659234 |
| pcaac425.creatinine                 | 0.007838219  | 0.016958944 | 0.644679712 |
| smohc161.pcaec362                   | -0.007909328 | 0.017113227 | 0.644688029 |
| pcaac386.smc260                     | -0.014888685 | 0.032215029 | 0.644695533 |
| pcaac381.lysine                     | -0.033891378 | 0.073335707 | 0.64471386  |
| pcaec405.c181                       | 0.008082593  | 0.017490127 | 0.644726036 |
| c14.smohc141                        | 0.009648662  | 0.020881632 | 0.644767954 |
| pcaac426.tryptophan                 | 0.001228062  | 0.002658176 | 0.644818077 |
| pcaec425.pcaac363                   | 0.004895784  | 0.010597256 | 0.644824175 |
| pcaec420.smohc241                   | -0.023793863 | 0.051516942 | 0.644910831 |
| c162.smohc141                       | 0.005774576  | 0.012503191 | 0.644922736 |
| smohc161.asymmetricdimethylarginine | 0.009167782  | 0.019855423 | 0.645009521 |
| pcaec322.pcaac361                   | -0.026442568 | 0.057269302 | 0.645012109 |
| smohc241.c18                        | 0.010401353  | 0.022531662 | 0.645076851 |
| c101.pcaac383                       | 0.001469555  | 0.003183465 | 0.645085086 |
| c102.pcaac362                       | 0.00126553   | 0.002742182 | 0.64516853  |
| smc241.tryptophan                   | 0.001422661  | 0.00308269  | 0.645172055 |
| pcaac403.smc161                     | 0.048108641  | 0.104245281 | 0.645175656 |
| pcaec322.histidine                  | 0.026129194  | 0.056626429 | 0.645221154 |
| c12.tryptophan                      | 0.001653876  | 0.003584265 | 0.645224078 |
| leucine.lysopcac280                 | -0.004047487 | 0.008771758 | 0.645227234 |
| pcaec300.pcaac380                   | -0.017797725 | 0.038577447 | 0.645278796 |
| smc240.pcaac406                     | 0.025964666  | 0.056284012 | 0.645304118 |
| c4.pcaac321                         | -0.005637489 | 0.012222315 | 0.645353858 |

|                                |              |             |             |
|--------------------------------|--------------|-------------|-------------|
| pcaec380.spermidine            | -0.023772023 | 0.051545069 | 0.645394309 |
| pcaec421.lysopcac203           | 0.041031765  | 0.088984727 | 0.645450754 |
| lysopcac180.pcaac364           | 0.018955018  | 0.041110012 | 0.645472128 |
| lysopcac180.c142               | 0.015054428  | 0.032654648 | 0.645515694 |
| pcaec363.pcaac422              | -0.007193298 | 0.015603451 | 0.645524728 |
| lysopcac204.pcaec343           | -0.02880838  | 0.062495226 | 0.645551594 |
| lysopcac180.pcaec402           | -0.007422129 | 0.01610409  | 0.645612123 |
| c5.threonine                   | 0.013668725  | 0.029663926 | 0.645682689 |
| pcaec406.smc241                | 0.007652621  | 0.016609363 | 0.645714693 |
| lysopcac140.pcaac425           | -0.037832182 | 0.082111975 | 0.645716478 |
| isoleucine.transhydroxyproline | 0.014435911  | 0.031335915 | 0.645756784 |
| smohc222.pcaac362              | 0.002436609  | 0.005289167 | 0.645759184 |
| pcaac362.tryptophan            | 0.00134086   | 0.002912222 | 0.645941195 |
| c141.pcaac363                  | 0.004680309  | 0.010167365 | 0.646011552 |
| pcaac404.smc160                | 0.037090399  | 0.080580854 | 0.646039252 |
| asparagine.tryptophan          | 0.002639199  | 0.005734519 | 0.646080675 |
| pcaec443.smc260                | -0.013843768 | 0.030083754 | 0.646120683 |
| c141oh.pcaec382                | 0.00427048   | 0.009282131 | 0.646191441 |
| smohc141.c8                    | 0.018722156  | 0.040694095 | 0.6461949   |
| methioninesulfoxide.pcaec446   | 0.045754718  | 0.099461792 | 0.646228919 |
| pcaec422.pcaac360              | -0.013244246 | 0.028792603 | 0.64625418  |
| alanine.pcaac424               | 0.003184629  | 0.006925327 | 0.646350979 |
| c162.pcaac421                  | 0.01781025   | 0.038741298 | 0.646444063 |
| smc181.tryptophan              | 0.000842755  | 0.001833185 | 0.646444536 |
| lysopcac161.pcaac421           | 0.017796226  | 0.038714522 | 0.646475765 |
| c142.tryptophan                | 0.001370111  | 0.002981247 | 0.646548848 |
| c16.smc241                     | -0.006133284 | 0.013346264 | 0.646567189 |
| smc240.pcaac386                | 0.01693853   | 0.036859876 | 0.646575916 |
| c162.lysopcac203               | -0.004965137 | 0.010805335 | 0.646597826 |
| citruline.alphaaminoadipicacid | 0.000693473  | 0.001509394 | 0.646647645 |
| pcaec383.pcaac420              | 0.048688496  | 0.105985867 | 0.646684614 |
| pcaac406.smohc141              | -0.005652454 | 0.012305081 | 0.646704196 |
| smc181.pcaac360                | 0.019708518  | 0.042912665 | 0.646767885 |
| pcaac341.pcaec445              | -0.011492467 | 0.025025871 | 0.646801516 |
| pcaec365.c12                   | 0.018553156  | 0.040407864 | 0.646856157 |
| smc260.pcaec383                | -0.018162523 | 0.039559254 | 0.646874206 |
| pcaec382.alphaaminoadipicacid  | -0.000597963 | 0.001302934 | 0.647007448 |
| lysopcac170.pcaec421           | 0.002601176  | 0.005667927 | 0.647012382 |
| pcaac360.pcaec406              | -0.006404921 | 0.013957009 | 0.647030659 |
| lysopcac160.pcaac424           | -0.001836375 | 0.004002919 | 0.647134221 |
| pcaec384.pcaac321              | -0.009502171 | 0.02071619  | 0.647188429 |
| smc161.pcaac426                | 0.020093725  | 0.043810245 | 0.647209755 |
| isoleucine.pcaec444            | -0.033280797 | 0.072563353 | 0.6472161   |
| pcaac386.pcaec444              | 0.056207974  | 0.122569567 | 0.647262323 |
| pcaac384.smc260                | -0.010667623 | 0.023265716 | 0.647310759 |



|                                   |              |             |             |
|-----------------------------------|--------------|-------------|-------------|
| pcaac321.taurine                  | 0.005901432  | 0.012872047 | 0.64734211  |
| pcaec420.tyrosine                 | 0.027305964  | 0.059560018 | 0.647347489 |
| pcaac405.tryptophan               | 0.002591777  | 0.005654543 | 0.647425018 |
| smohc222.pcaac365                 | 0.022109259  | 0.048238914 | 0.647442799 |
| c51.leucine                       | 0.015366599  | 0.033530167 | 0.647468971 |
| pcaec363.pcaec360                 | 0.002461625  | 0.005371507 | 0.647481249 |
| lysopcac170.pcaec444              | -0.031304719 | 0.068310214 | 0.647482495 |
| pcaec421.pcaac381                 | 0.02046689   | 0.044674844 | 0.647584825 |
| asparticacid.alphaaminoadipicacid | -0.000209546 | 0.000457401 | 0.647590183 |
| phenylalanine.pcaec365            | 0.010335516  | 0.02256085  | 0.647593997 |
| smohc241.pcaec446                 | -0.011942986 | 0.026074125 | 0.647649538 |
| lysopcac182.prolinr               | -0.011875107 | 0.025925961 | 0.647649952 |
| pcaec423.ornithine                | -0.015677393 | 0.034230637 | 0.647683041 |
| pcaac342.arginine                 | -0.017002441 | 0.037125531 | 0.647698365 |
| smc181.pcaec406                   | 0.007317775  | 0.015980588 | 0.647737897 |
| smohc222.pcaac343                 | 0.009290855  | 0.02028945  | 0.647738558 |
| creatinine.pcaec406               | 0.002755226  | 0.006017253 | 0.647758569 |
| pcaac361.pcaac426                 | 0.023052276  | 0.050354633 | 0.647822443 |
| c14.pcaac380                      | -0.017291607 | 0.037774607 | 0.647851889 |
| acetylnithoine.pcaac342           | -0.001717788 | 0.003753078 | 0.647892319 |
| methionine.pcaac403               | 0.001720243  | 0.003758779 | 0.647921632 |
| pcaac341.isoleucine               | -0.009451956 | 0.020653282 | 0.647929521 |
| leucine.pcaac365                  | -0.014586538 | 0.031877436 | 0.647977687 |
| pcaec322.smohc141                 | 0.006045165  | 0.013214395 | 0.648059246 |
| pcaec424.tryptophan               | -0.000531964 | 0.001162864 | 0.64806525  |
| pcaac401.pcaec405                 | -0.046557845 | 0.101780075 | 0.648082466 |
| lysine.tryptophan                 | -0.001132974 | 0.002477015 | 0.648111642 |
| smohc141.pcaec301                 | -0.021639701 | 0.047319105 | 0.648169567 |
| smc160.h1                         | 0.000704363  | 0.001541106 | 0.64835885  |
| citruine.asparticacid             | 0.012908628  | 0.028252095 | 0.648460326 |
| c16.c8                            | 0.008340814  | 0.018260191 | 0.648555581 |
| c51.smc260                        | -0.007556037 | 0.016543713 | 0.64858726  |
| pcaac383.pcaac342                 | 0.004440783  | 0.0097232   | 0.64859539  |
| pcaac402.pcaac424                 | -0.007087559 | 0.015518426 | 0.648596375 |
| smohc141.smc161                   | 0.040903952  | 0.089579144 | 0.648664729 |
| glutamine.alphaaminoadipicacid    | 0.000375239  | 0.000821825 | 0.648687006 |
| pcaec341.c14                      | -0.016965537 | 0.037157906 | 0.648696377 |
| pcaec423.alanine                  | -0.005098375 | 0.011166475 | 0.648696889 |
| pcaec343.lysopcac161              | 0.036537809  | 0.080051271 | 0.64880351  |
| pcaac405.pcaec384                 | 0.016831273  | 0.03687601  | 0.648804429 |
| serine.threonine                  | 0.007119637  | 0.015600091 | 0.648836357 |
| smc241.threonine                  | 0.012837256  | 0.028132508 | 0.64888868  |
| smohc141.pcaac362                 | 0.002056921  | 0.004507928 | 0.648904168 |
| pcaec362.pcaac406                 | -0.015260342 | 0.033448068 | 0.648939938 |
| isoleucine.pcaec384               | 0.010898103  | 0.023888082 | 0.648957714 |

|                                  |              |             |             |
|----------------------------------|--------------|-------------|-------------|
| pcaac300.smohc141                | 0.012086172  | 0.026496207 | 0.649006354 |
| pcaec406.pcaec321                | 0.01961239   | 0.043001692 | 0.649051634 |
| pcaac384.pcaac366                | 0.00167289   | 0.00366861  | 0.649111208 |
| histidine.pcaec343               | -0.030443709 | 0.066770452 | 0.649150845 |
| smc161.acetylmithoine            | -0.0094574   | 0.020743094 | 0.649162145 |
| pcaac385.pcaac362                | 0.001323705  | 0.002903353 | 0.649167217 |
| pcaac342.lysopcac281             | 0.004074179  | 0.008941132 | 0.649350874 |
| pcaac344.pcaac320                | -0.041670858 | 0.091453139 | 0.649361212 |
| pcaec321.acetylmithoine          | 0.00799997   | 0.017557429 | 0.649366035 |
| lysopcac281.smc260               | -0.009273392 | 0.020352325 | 0.649368178 |
| pcaac422.pcaec403                | -0.006231169 | 0.013676197 | 0.64938354  |
| pcaec363.pcaac406                | -0.024583648 | 0.053963119 | 0.649424837 |
| c2.c162                          | -0.032710865 | 0.071807425 | 0.649444873 |
| pcaac405.transhydroxyproline     | 0.013739117  | 0.030163907 | 0.649483572 |
| pcaec382.smc240                  | 0.023562145  | 0.051734862 | 0.649513445 |
| methioninesulfoxide.glutamicacid | 0.037959591  | 0.083366633 | 0.649590394 |
| smohc222.pcaec406                | 0.002226305  | 0.004889837 | 0.649619756 |
| pcaec301.smohc141                | 0.00211804   | 0.004652798 | 0.649672562 |
| pcaac425.c101                    | 0.004336649  | 0.009528114 | 0.649727273 |
| pcaec421.lysopcac281             | 0.004686608  | 0.010297518 | 0.649743211 |
| smc202.tryptophan                | 0.000883953  | 0.001942589 | 0.649801808 |
| histidine.pcaac342               | -0.001407354 | 0.003093215 | 0.649843122 |
| pcaec424.alphaaminoadipicacid    | -0.000969116 | 0.00213008  | 0.649853134 |
| pcaec422.c12                     | -0.026723562 | 0.058739404 | 0.649864477 |
| pcaac281.ornithine               | -0.010048478 | 0.022090311 | 0.649914361 |
| smc161.lysopcac140               | -0.000690543 | 0.001518153 | 0.64993164  |
| pcaec446.pcaec421                | -0.000571875 | 0.001257345 | 0.649953623 |
| pcaac404.pcaac362                | -0.003754965 | 0.008255974 | 0.649960073 |
| arginine.pcaac363                | -0.005958777 | 0.013102091 | 0.649975948 |
| c141.pcaac383                    | 0.006098143  | 0.01340882  | 0.649983038 |
| alphaaminoadipicacid.isoleucine  | -0.00502718  | 0.011056619 | 0.650061925 |
| pcaac406.glutamicacid            | -0.013249489 | 0.029145423 | 0.65011703  |
| methionine.c12                   | -0.021837935 | 0.048039625 | 0.650129646 |
| smc180.pcaac405                  | -0.02251915  | 0.049538898 | 0.650134391 |
| c18.pcaac321                     | -0.010853691 | 0.023878087 | 0.650155203 |
| c0.tryptophan                    | -0.001032975 | 0.002272879 | 0.650203531 |
| c101.lysopcac280                 | -0.008962452 | 0.019720751 | 0.650211206 |
| pcaac381.isoleucine              | -0.008058532 | 0.017731947 | 0.650214132 |
| serine.pcaec404                  | 0.00963439   | 0.021200483 | 0.650229936 |
| c3.smc161                        | 0.028478108  | 0.062675702 | 0.650279909 |
| smc261.methioninesulfoxide       | 0.006322674  | 0.013915269 | 0.650281967 |
| methioninesulfoxide.isoleucine   | -0.011473338 | 0.025252055 | 0.65029409  |
| smc161.smc181                    | -0.008459473 | 0.01861965  | 0.650310038 |
| c141oh.pcaec343                  | -0.025185418 | 0.055450013 | 0.650403363 |
| alphaaminoadipicacid.c4          | -0.007703694 | 0.016967128 | 0.65052109  |

|                                   |              |             |             |
|-----------------------------------|--------------|-------------|-------------|
| pcaec425.smc261                   | 0.024602546  | 0.054191566 | 0.650552864 |
| methionine.smc240                 | -0.007007079 | 0.015435135 | 0.650569189 |
| pcaac402.c18                      | -0.024220277 | 0.053362406 | 0.650631399 |
| pcaec443.c2                       | 0.036758841  | 0.080994473 | 0.650659372 |
| lysopcac181.prolinr               | -0.017812626 | 0.039255725 | 0.650720507 |
| c8.histidine                      | 0.022674861  | 0.049973102 | 0.650732979 |
| pcaac383.pcaac323                 | 0.028893065  | 0.063691169 | 0.65080343  |
| smohc241.taurine                  | 0.018006198  | 0.039693549 | 0.650812671 |
| smc160.c8                         | 0.013685359  | 0.030170667 | 0.650835766 |
| pcaac365.tryptophan               | 0.00156764   | 0.00345711  | 0.650939272 |
| citruline.pcaec383                | -0.02975637  | 0.06563044  | 0.650983234 |
| lysine.asymmetricdimethylarginine | -0.006206697 | 0.013689452 | 0.650983315 |
| c102.pcaac366                     | 0.00209195   | 0.00461459  | 0.651025552 |
| serotonin.taurine                 | 0.008382226  | 0.018491734 | 0.651052895 |
| pcaec424.lysopcac281              | 0.004754119  | 0.010489403 | 0.651099706 |
| pcaac364.c102                     | 0.011772039  | 0.025974987 | 0.65111687  |
| lysopcac170.methioninesulfoxide   | 0.023233692  | 0.051288555 | 0.651265689 |
| c162.pcaec361                     | -0.004756736 | 0.010503177 | 0.651347659 |
| pcaec301.glutamine                | -0.004369703 | 0.009650319 | 0.651406152 |
| lysopcac181.pcaac240              | -0.005455428 | 0.012048675 | 0.651421642 |
| smohc161.c8                       | 0.015135726  | 0.033429467 | 0.651433447 |
| smc180.ornithine                  | -0.01565923  | 0.034612457 | 0.651684869 |
| pcaec405.smc240                   | 0.012605009  | 0.02786216  | 0.651692067 |
| pcaac426.pcaac320                 | -0.047509671 | 0.105021246 | 0.651709662 |
| c51.pcaac422                      | 0.013951389  | 0.030841004 | 0.651721578 |
| pcaac362.pcaec425                 | -0.002383918 | 0.005270204 | 0.651740359 |
| c141oh.tryptophan                 | 0.000879477  | 0.001944351 | 0.651750686 |
| pcaac364.pcaac240                 | -0.009409729 | 0.020803122 | 0.651751777 |
| glutamicacid.pcaac321             | 0.003672641  | 0.008119608 | 0.651755619 |
| pcaac366.pcaec382                 | -0.005783937 | 0.012789236 | 0.651803847 |
| c8.pcaac362                       | 0.002411592  | 0.005332934 | 0.651834798 |
| c2.pcaec362                       | 0.008780313  | 0.019416817 | 0.651839025 |
| pcaac406.tryptophan               | 0.000686421  | 0.001518118 | 0.651874093 |
| c141oh.pcaac342                   | 0.002386046  | 0.005278032 | 0.651932705 |
| pcaac424.smc181                   | 0.002358724  | 0.005219059 | 0.6520238   |
| pcaac363.h1                       | 0.000616883  | 0.001364974 | 0.652028728 |
| smc241.lysopcac170                | 0.00501912   | 0.011109945 | 0.652150411 |
| pcaec420.c16                      | 0.014311868  | 0.031680764 | 0.652161586 |
| c181.lysopcac161                  | -0.027598022 | 0.061091999 | 0.652166864 |
| c102.c51dc                        | -0.044228905 | 0.097910974 | 0.652180919 |
| smohc221.h1                       | 0.000596244  | 0.001319929 | 0.652181644 |
| pcaac240.transhydroxyproline      | -0.023921904 | 0.052958025 | 0.652189029 |
| pcaac320.tyrosine                 | 0.021089448  | 0.046696621 | 0.652251973 |
| lysopcac280.tryptophan            | -0.000856811 | 0.001897375 | 0.652287693 |
| c0.phenylalanine                  | 0.010705348  | 0.023708562 | 0.652314872 |

|                               |              |             |             |
|-------------------------------|--------------|-------------|-------------|
| smohc141.asparagine           | 0.002915312  | 0.006456473 | 0.652319304 |
| pcaec365.pcaec343             | -0.041451819 | 0.091805649 | 0.652330869 |
| pcaac360.pcaec362             | 0.010421652  | 0.023084048 | 0.652367926 |
| alphaaminoadipicacid.pcaec406 | -0.001960044 | 0.004344328 | 0.652578162 |
| c14.pcaac424                  | 0.002550243  | 0.005652552 | 0.652582731 |
| lysopcac281.pcaac424          | -0.004173792 | 0.009251414 | 0.652593406 |
| smohc161.smohc221             | 0.031237124  | 0.069257785 | 0.652683237 |
| smc180.pcaac422               | -0.008620707 | 0.019121411 | 0.652817226 |
| serine.pcaec403               | -0.016209891 | 0.035959153 | 0.652856258 |
| lysopcac281.pcaac321          | 0.007104497  | 0.015762252 | 0.652897753 |
| lysopcac203.lysopcac180       | 0.019687106  | 0.043685908 | 0.652953367 |
| pcaec443.tryptophan           | -0.001048631 | 0.002327098 | 0.652977485 |
| pcaac341.lysopcac203          | 0.008646226  | 0.019190419 | 0.653026786 |
| pcaec422.pcaac383             | 0.003803246  | 0.008443675 | 0.653115705 |
| pcaec381.alphaaminoadipicacid | -0.00045095  | 0.001001268 | 0.653148851 |
| c181.pcaec384                 | -0.007952987 | 0.017659601 | 0.65317052  |
| c18.tyrosine                  | -0.01984152  | 0.044063767 | 0.653212336 |
| c5.alanine                    | 0.004349856  | 0.009662262 | 0.653284822 |
| alphaaminoadipicacid.pcaac366 | 0.0065645    | 0.014581808 | 0.653289155 |
| smc181.acetylmithoine         | -0.008775387 | 0.019495377 | 0.653330667 |
| c5.pcaec406                   | -0.003933151 | 0.008737955 | 0.653333476 |
| alanine.pcaec425              | 0.001110893  | 0.002468069 | 0.653345448 |
| c141.tryptophan               | 0.001154433  | 0.002565061 | 0.65337825  |
| c101.pcaac366                 | 0.002203215  | 0.004895481 | 0.653385153 |
| pcaec446.lysopcac281          | 0.002800385  | 0.006223089 | 0.653422182 |
| pcaec386.acetylmithoine       | -0.011238743 | 0.024982286 | 0.653516284 |
| smc181.pcaac363               | 0.002043519  | 0.004542763 | 0.653536412 |
| methioninesulfoxide.pcaec362  | 0.008387022  | 0.018647863 | 0.653595898 |
| pcaec342.pcaec446             | -0.013906024 | 0.030919012 | 0.653596871 |
| pcaec341.smohc161             | 0.009705986  | 0.021581743 | 0.653614943 |
| pcaec405.phenylalanine        | -0.016663076 | 0.037055537 | 0.653652987 |
| lysopcac180.pcaec421          | -0.003076943 | 0.006843008 | 0.653675107 |
| pcaec341.pcaac380             | -0.02733181  | 0.060805271 | 0.653783227 |
| lysopcac170.putrescine        | 0.018262832  | 0.040635361 | 0.653830253 |
| pcaec383.pcaac363             | -0.009418881 | 0.020957432 | 0.653832317 |
| lysine.smc202                 | 0.018546286  | 0.041269644 | 0.653858387 |
| c10.taurine                   | -0.017685002 | 0.039363341 | 0.653942537 |
| lysopcac140.lysine            | 0.035771104  | 0.079621337 | 0.653950203 |
| pcaec420.methionine           | -0.012412725 | 0.027633137 | 0.653999288 |
| pcaec340.pcaac406             | -0.020320258 | 0.045236845 | 0.653999296 |
| smc202.glutamine              | -0.006958084 | 0.015492377 | 0.654047893 |
| pcaac420.pcaec401             | -0.012464188 | 0.027753149 | 0.6540627   |
| c141.methionine               | 0.013972455  | 0.031112702 | 0.654075133 |
| c182.pcaec403                 | 0.012301503  | 0.027394171 | 0.654101168 |
| pcaac384.pcaac361             | 0.01730159   | 0.038532584 | 0.654132511 |

|                                    |              |             |             |
|------------------------------------|--------------|-------------|-------------|
| pcaac342.c182                      | 0.016405501  | 0.036539816 | 0.654158358 |
| pcaec422.pcaac381                  | 0.011096624  | 0.024715621 | 0.654161189 |
| pcaec301.pcaac360                  | 0.013166131  | 0.02932687  | 0.654181187 |
| lysopcac181.pcaac404               | 0.002541027  | 0.005660212 | 0.654192946 |
| pcaac281.pcaec406                  | 0.001243823  | 0.002770888 | 0.654220392 |
| pcaac421.pcaac342                  | 0.002806285  | 0.006252167 | 0.654249061 |
| pcaec365.pcaac424                  | -0.006119549 | 0.013634365 | 0.654261462 |
| pcaac344.pcaac421                  | 0.024068229  | 0.053641095 | 0.654364103 |
| c162.pcaac425                      | 0.016365842  | 0.036475541 | 0.654371455 |
| c16.serotonin                      | 0.048424821  | 0.107937377 | 0.654401529 |
| smc260.asparagine                  | 0.007498677  | 0.016714673 | 0.654408502 |
| pcaac322.pcaec342                  | 0.0346698    | 0.077281294 | 0.65441581  |
| asparagine.c51dc                   | 0.04443683   | 0.099065589 | 0.654457968 |
| lysopcac182.spermidine             | -0.025664789 | 0.057221828 | 0.654490881 |
| lysopcac182.isoleucine             | 0.020610836  | 0.045953723 | 0.654491672 |
| pcaec402.alphaaminoadipicacid      | -0.000528215 | 0.00117791  | 0.654548301 |
| pcaac421.tryptophan                | -0.001426538 | 0.003181242 | 0.654557173 |
| pcaec403.smc181                    | 0.002003773  | 0.00446855  | 0.654560847 |
| alanine.pcaec421                   | -0.000843657 | 0.001881511 | 0.6545776   |
| pcaac404.smc180                    | 0.00441079   | 0.009838696 | 0.65463737  |
| pcaec405.smohc241                  | -0.02594069  | 0.05788451  | 0.654756017 |
| smc241.pcaec406                    | 0.002872794  | 0.006411366 | 0.654804508 |
| acetylnithoine.alphaaminoadipicaci | -0.001444985 | 0.003225179 | 0.654837355 |
| c141.taurine                       | -0.010189978 | 0.022744081 | 0.654840916 |
| pcaec443.alphaaminoadipicacid      | -0.000652873 | 0.001457538 | 0.654912234 |
| lysopcac280.pcaec406               | 0.002983573  | 0.006661685 | 0.654954001 |
| pcaac401.c101                      | -0.011676608 | 0.026074405 | 0.654991328 |
| pcaac421.transhydroxyproline       | -0.014577913 | 0.032555836 | 0.655017886 |
| pcaec342.h1                        | 0.001941034  | 0.00433498  | 0.655033013 |
| c8.c2                              | 0.020346724  | 0.045443773 | 0.655052333 |
| pcaac281.smc260                    | -0.010632029 | 0.023746974 | 0.655061412 |
| spermidine.c3                      | 0.053888161  | 0.120391629 | 0.655143647 |
| pcaac383.acetylnithoine            | 0.004468503  | 0.009986525 | 0.655254471 |
| pcaec343.pcaec406                  | 0.001692027  | 0.003781718 | 0.655276382 |
| pcaac386.pcaac342                  | -0.008304347 | 0.018561609 | 0.655297396 |
| c101.pcaec401                      | -0.009519579 | 0.021278213 | 0.655302799 |
| pcaac240.pcaec404                  | -0.033962581 | 0.075934602 | 0.655393002 |
| prolinr.c4                         | -0.004421521 | 0.0098862   | 0.655406889 |
| c16.pcaec361                       | -0.004855227 | 0.010856492 | 0.655423384 |
| pcaac300.smohc161                  | 0.009362443  | 0.020935306 | 0.655430893 |
| pcaec361.lysopcac180               | 0.032749984  | 0.073242943 | 0.655478769 |
| pcaac320.c51                       | -0.018112065 | 0.040512124 | 0.655525    |
| pcaac281.asparticacid              | 0.007774322  | 0.01739002  | 0.655540205 |
| pcaac402.pcaec420                  | 0.016394431  | 0.036676846 | 0.655583269 |
| pcaac320.pcaec406                  | 0.00306108   | 0.006849086 | 0.655629432 |

|                                   |              |             |             |
|-----------------------------------|--------------|-------------|-------------|
| c0.smc241                         | -0.008308847 | 0.018595139 | 0.655704104 |
| glutamine.smc202                  | 0.020029845  | 0.04482728  | 0.655708656 |
| pcaec384.pcaec386                 | -0.003152486 | 0.007055857 | 0.655732192 |
| pcaec421.pcaac365                 | 0.030238045  | 0.067681445 | 0.655746516 |
| pcaec321.pcaac343                 | -0.016309603 | 0.036509192 | 0.655778331 |
| c10.alphaaminoadipicacid          | -0.0005991   | 0.001341165 | 0.655796316 |
| pcaec401.pcaec340                 | -0.026427462 | 0.05916356  | 0.655807964 |
| lysopcac160.pcaec445              | 0.035703805  | 0.079935339 | 0.655826847 |
| pcaec425.pcaac364                 | 0.013637195  | 0.030535506 | 0.655868141 |
| pcaec404.pcaac240                 | 0.007703776  | 0.01725368  | 0.655940746 |
| pcaec384.isoleucine               | -0.00712926  | 0.015968642 | 0.655974401 |
| pcaec425.serotonin                | 0.043424031  | 0.097300277 | 0.656093185 |
| smohc141.asparticacid             | 0.009405641  | 0.021075354 | 0.656095084 |
| pcaec360.smohc141                 | 0.025610315  | 0.057402491 | 0.656190801 |
| pcaec360.pcaec385                 | -0.021716715 | 0.048682903 | 0.656240041 |
| acetylnithoine.asymmetricdimethyl | -0.009280076 | 0.020804096 | 0.656251107 |
| pcaac406.pcaac401                 | 0.00591031   | 0.013250799 | 0.656276663 |
| c5.c142                           | -0.043076751 | 0.096580611 | 0.656287904 |
| pcaac321.c16                      | 0.010403532  | 0.023328706 | 0.65633441  |
| acetylnithoine.pcaec360           | 0.003463249  | 0.00776807  | 0.656422831 |
| pcaac364.smc260                   | -0.008827712 | 0.019800956 | 0.656429219 |
| pcaac385.transhydroxyproline      | 0.013134879  | 0.029463286 | 0.656441875 |
| c0.pcaac364                       | -0.009541392 | 0.02140373  | 0.656458603 |
| pcaec363.pcaec444                 | -0.038135505 | 0.0855546   | 0.656485327 |
| c10.pcaac362                      | 0.00276363   | 0.006200758 | 0.656523025 |
| pcaec321.lysopcac181              | 0.015584415  | 0.034969807 | 0.656551057 |
| smohc141.ornithine                | -0.007664614 | 0.017204721 | 0.656665405 |
| pcaac323.pcaec365                 | 0.012197085  | 0.027378816 | 0.656666318 |
| serine.smc241                     | 0.005022097  | 0.011273465 | 0.656676417 |
| pcaec340.pcaec402                 | 0.024614089  | 0.055260359 | 0.656719045 |
| pcaec365.phenylalanine            | 0.009126368  | 0.020494154 | 0.656794492 |
| alanine.pcaec363                  | 0.006639514  | 0.014910516 | 0.656812492 |
| pcaac425.pcaec404                 | -0.006945568 | 0.01559874  | 0.656831221 |
| pcaec301.pcaec362                 | 0.004294821  | 0.009645587 | 0.656832589 |
| pcaac343.pcaac385                 | 0.019973717  | 0.044860493 | 0.656848547 |
| c8.alphaaminoadipicacid           | -0.00036962  | 0.000830159 | 0.656848908 |
| smc202.acetylnithoine             | -0.015662277 | 0.03518804  | 0.656948312 |
| smc240.methionine                 | 0.009976715  | 0.022416078 | 0.656971858 |
| pcaac341.taurine                  | 0.008033442  | 0.018050625 | 0.656985545 |
| pcaac344.lysopcac203              | 0.006446464  | 0.014488136 | 0.657059699 |
| c2.pcaac421                       | 0.02159434   | 0.048533444 | 0.657067234 |
| pcaec301.h1                       | 0.001423958  | 0.00320038  | 0.657069602 |
| pcaac300.smc180                   | -0.003672367 | 0.008253902 | 0.657076122 |
| smohc222.valine                   | 0.033815297  | 0.076012046 | 0.657117485 |
| serine.pcaac362                   | -0.005434388 | 0.012219104 | 0.657205736 |

|                                    |              |             |             |
|------------------------------------|--------------|-------------|-------------|
| glutamicacid.phenylalanine         | 0.025664139  | 0.057716678 | 0.657269148 |
| prolinr.pcaec362                   | -0.00422612  | 0.009505337 | 0.657306873 |
| pcaec386.phenylalanine             | 0.00977209   | 0.021980056 | 0.657318392 |
| smohc222.pcaac363                  | 0.002109785  | 0.00474548  | 0.657318896 |
| lysopcac181.c8                     | 0.021436705  | 0.048217042 | 0.657319269 |
| pcaac404.tryptophan                | -0.001681897 | 0.003784399 | 0.657433721 |
| pcaac344.pcaac362                  | 0.003155403  | 0.007102589 | 0.657554937 |
| pcaec444.pcaec386                  | -0.002743431 | 0.00617549  | 0.657566371 |
| spermidine.asymmetricdimethylargir | -0.036346673 | 0.081819771 | 0.657578309 |
| lysopcac170.pcaac422               | 0.03830635   | 0.086242075 | 0.657618744 |
| pcaac420.smohc141                  | -0.00531276  | 0.011961348 | 0.657627247 |
| isoleucine.pcaac424                | 0.004937171  | 0.011116108 | 0.657638034 |
| pcaac342.lysopcac203               | 0.006719898  | 0.01513123  | 0.657665285 |
| arginine.smc180                    | 0.001876245  | 0.004224895 | 0.657676228 |
| c141oh.pcaac363                    | 0.004176013  | 0.009409439 | 0.65787932  |
| c18.pcaec420                       | 0.016196722  | 0.036498409 | 0.657912466 |
| c5.smohc241                        | 0.031443055  | 0.07085554  | 0.657914138 |
| c102.pcaac363                      | 0.005856299  | 0.013197393 | 0.657925827 |
| c51dc.tryptophan                   | 0.001408829  | 0.003175046 | 0.657945459 |
| c10.smc260                         | 0.013066302  | 0.029450083 | 0.657976607 |
| pcaac421.smc241                    | 0.004181816  | 0.00942588  | 0.657993644 |
| leucine.serotonin                  | 0.033996177  | 0.07663236  | 0.658012176 |
| c4.smc241                          | 0.023061978  | 0.051996528 | 0.658082664 |
| lysopcac140.pcaac366               | -0.008931276 | 0.020137814 | 0.658098161 |
| methionine.histidine               | -0.028572423 | 0.064424116 | 0.658100063 |
| lysopcac160.pcaac321               | -0.010744735 | 0.024227535 | 0.658109001 |
| c181.smc241                        | -0.004768252 | 0.010752697 | 0.658141893 |
| pcaac424.pcaac360                  | -0.023616894 | 0.05325823  | 0.658146139 |
| c162.lysopcac181                   | -0.023591391 | 0.053208413 | 0.6581924   |
| pcaec384.pcaec446                  | 0.034656294  | 0.078176887 | 0.658243578 |
| arginine.pcaec341                  | -0.01504078  | 0.033930246 | 0.658258595 |
| pcaec421.smc181                    | 0.001888634  | 0.004261259 | 0.65831267  |
| c0.pcaac426                        | 0.014677455  | 0.033116589 | 0.658316179 |
| pcaec402.spermidine                | -0.022486816 | 0.050738114 | 0.658324645 |
| pcaac321.pcaec363                  | -0.011249323 | 0.025388044 | 0.658395684 |
| c162.smc241                        | 0.004928601  | 0.011123898 | 0.658418101 |
| c12.asymmetricdimethylarginine     | 0.004732211  | 0.010681156 | 0.658433414 |
| pcaec405.lysine                    | -0.037999606 | 0.085777118 | 0.658461562 |
| leucine.c4                         | 0.008815214  | 0.019899238 | 0.658469836 |
| c12.pcaec363                       | -0.00632519  | 0.014279559 | 0.658497551 |
| pcaec445.c8                        | -0.013057952 | 0.029479624 | 0.658501683 |
| pcaac383.pcaec386                  | 0.003904309  | 0.008814435 | 0.658504247 |
| pcaac421.h1                        | 0.001130217  | 0.002551613 | 0.658506215 |
| c51.pcaac366                       | 0.005680213  | 0.012826128 | 0.658563572 |
| lysopcac170.pcaac426               | -0.026479393 | 0.059791924 | 0.658566168 |

|                                    |              |             |             |
|------------------------------------|--------------|-------------|-------------|
| c8.c162                            | -0.03217206  | 0.07265874  | 0.658620974 |
| c8.pcaac404                        | 0.00169171   | 0.003821344 | 0.658680697 |
| c8.smc241                          | -0.004946663 | 0.011173962 | 0.658684125 |
| kynurenine.pcaec402                | -0.018142864 | 0.040999492 | 0.658814891 |
| pcaac362.smc202                    | -0.01113041  | 0.0251533   | 0.658823124 |
| pcaec384.lysine                    | -0.021536266 | 0.04867285  | 0.658847055 |
| leucine.smc181                     | 0.00515852   | 0.011658551 | 0.658849302 |
| smc161.tryptophan                  | 0.000903193  | 0.002041312 | 0.65885612  |
| kynurenine.pcaec344                | -0.012195066 | 0.027572312 | 0.658973986 |
| pcaac384.transhydroxyproline       | -0.014150248 | 0.031994806 | 0.658993384 |
| ornithine.pcaec362                 | -0.002867097 | 0.006483317 | 0.659022386 |
| glutamicacid.pcaac404              | -0.004125335 | 0.009332369 | 0.65915303  |
| c162.taurine                       | -0.021527749 | 0.048701091 | 0.659158463 |
| c5.pcaac342                        | -0.003415897 | 0.007728971 | 0.659214906 |
| pcaec381.taurine                   | 0.025378295  | 0.057425652 | 0.659234441 |
| pcaec404.smc181                    | 0.002017126  | 0.004565568 | 0.659321379 |
| smc261.ornithine                   | -0.010938364 | 0.02475975  | 0.659344908 |
| pcaec341.taurine                   | 0.008713832  | 0.019725023 | 0.659355504 |
| c51dc.pcaac320                     | -0.016094224 | 0.036431845 | 0.659357567 |
| pcaec401.lysopcac170               | 0.003606884  | 0.008164888 | 0.659362643 |
| c102.c182                          | -0.03605285  | 0.081619097 | 0.659387715 |
| pcaac364.pcaac425                  | 0.033584865  | 0.076042181 | 0.659430866 |
| c4.pcaec342                        | -0.01815919  | 0.041122244 | 0.659481807 |
| smohc161.c12                       | 0.025586965  | 0.057969241 | 0.659627501 |
| pcaec443.pcaec404                  | 0.016062964  | 0.036401369 | 0.659710553 |
| methioninesulfoxide.alphaaminoadip | -0.000358389 | 0.000812207 | 0.659725774 |
| pcaec383.serine                    | 0.034382128  | 0.077941942 | 0.659817974 |
| pcaac422.pcaec422                  | 0.010250173  | 0.023237843 | 0.659837166 |
| c18.lysopcac203                    | -0.005792248 | 0.013133051 | 0.65987665  |
| pcaec341.acetylorlithoine          | 0.005453951  | 0.012366742 | 0.659895392 |
| pcaac386.lysopcac160               | 0.007704436  | 0.017472884 | 0.659953856 |
| c51dc.pcaac364                     | -0.018763604 | 0.042562617 | 0.660018612 |
| lysopcac170.smohc222               | 0.004798147  | 0.01088442  | 0.660033058 |
| pcaec380.lysopcac203               | -0.012562422 | 0.028498674 | 0.660047335 |
| pcaac342.c51                       | -0.037587957 | 0.085295588 | 0.660140125 |
| pcaec404.lysopcac160               | -0.029782576 | 0.067587025 | 0.660157147 |
| pcaac365.pcaac383                  | 0.003751752  | 0.00851585  | 0.660225126 |
| c12.pcaac383                       | 0.001775272  | 0.004030564 | 0.66030359  |
| pcaac362.pcaac363                  | -0.007433576 | 0.016878134 | 0.660322411 |
| pcaac361.alanine                   | 0.028117723  | 0.063863269 | 0.660428155 |
| smc202.c5                          | -0.002034749 | 0.004621527 | 0.660430841 |
| smc181.smc241                      | 0.011412075  | 0.025927962 | 0.660525386 |
| lysopcac140.c4                     | -0.007879252 | 0.017901917 | 0.660533257 |
| glutamine.smohc141                 | 0.013444023  | 0.030555736 | 0.660642307 |
| pcaec340.pcaac342                  | 0.002175559  | 0.004945223 | 0.660680048 |



|                              |              |             |             |
|------------------------------|--------------|-------------|-------------|
| lysopcac170.pcaac424         | -0.00147651  | 0.003356366 | 0.660693161 |
| pcaec363.pcaac364            | 0.016088911  | 0.036573988 | 0.660702455 |
| smohc222.pcaec386            | 0.006185045  | 0.014060481 | 0.660711003 |
| glutamine.pcaac323           | -0.022045049 | 0.05011906  | 0.660736245 |
| smc160.pcaec446              | -0.008408005 | 0.019117636 | 0.660772393 |
| pcaec422.c3                  | -0.008471008 | 0.019264202 | 0.660827033 |
| pcaec421.lysopcac204         | -0.025508662 | 0.058015675 | 0.660857572 |
| smohc161.pcaec385            | -0.022727288 | 0.051692028 | 0.66087095  |
| pcaec360.smc241              | -0.00408802  | 0.009298509 | 0.660888713 |
| pcaec380.c3                  | 0.011165806  | 0.02540498  | 0.660982745 |
| pcaac323.tryptophan          | 0.002404202  | 0.005471013 | 0.66103245  |
| c8.pcaac361                  | 0.018413356  | 0.04190847  | 0.661085158 |
| lysopcac204.c16              | 0.017463869  | 0.039754047 | 0.661137827 |
| pcaec406.c182                | 0.009776556  | 0.022257521 | 0.661174369 |
| methioninesulfoxide.smohc141 | -0.01062875  | 0.024201471 | 0.66122459  |
| lysopcac281.pcaac402         | -0.028406221 | 0.06468375  | 0.66124077  |
| c141.c51dc                   | 0.050227237  | 0.114385035 | 0.661275987 |
| serine.pcaac425              | -0.025083658 | 0.057126169 | 0.661286442 |
| pcaec382.pcaac322            | 0.022815197  | 0.051962305 | 0.661301023 |
| glycine.pcaac384             | -0.024186468 | 0.055100054 | 0.661385334 |
| pcaec383.smc202              | 0.029991724  | 0.068335971 | 0.661435279 |
| putrescine.pcaac342          | -0.002016075 | 0.004593758 | 0.661445166 |
| smc241.glutamine             | -0.005871706 | 0.013380234 | 0.661472864 |
| pcaac343.pcaec301            | -0.035496641 | 0.080892288 | 0.661487813 |
| pcaac421.smc260              | -0.012543606 | 0.028586232 | 0.661498525 |
| lysopcac203.pcaac424         | -0.003620943 | 0.008252368 | 0.661514831 |
| c4.c12                       | -0.01281564  | 0.029209647 | 0.661536129 |
| c16.lysopcac280              | -0.007851786 | 0.017896225 | 0.661541216 |
| pcaec341.pcaec380            | -0.012984236 | 0.029594448 | 0.661541833 |
| pcaec403.c51dc               | -0.048681679 | 0.110960087 | 0.661547247 |
| kynurenine.pcaec365          | 0.008298951  | 0.0189191   | 0.661602777 |
| lysopcac203.pcaec380         | 0.019062131  | 0.04346432  | 0.661664221 |
| c16.kynurenine               | -0.006691779 | 0.015259898 | 0.661699685 |
| glutamine.pcaac322           | 0.012737225  | 0.029048929 | 0.661732747 |
| pcaec424.c101                | 0.008656143  | 0.019743355 | 0.661762844 |
| prolinr.pcaec384             | 0.004182672  | 0.009540229 | 0.661768968 |
| acetylmithoine.pcaec401      | 0.007813057  | 0.017823969 | 0.661826259 |
| pcaac281.pcaec402            | -0.018407724 | 0.041999162 | 0.661867925 |
| pcaac240.smohc141            | 0.009792896  | 0.022343631 | 0.661869451 |
| pcaac366.smohc141            | -0.008586435 | 0.019593205 | 0.661905909 |
| leucine.pcaac363             | -0.007349881 | 0.016778379 | 0.66203513  |
| pcaac240.pcaac320            | -0.039129716 | 0.089329002 | 0.662046839 |
| asparticacid.pcaec424        | 0.007891479  | 0.018016495 | 0.662065879 |
| lysine.pcaac425              | -0.035552951 | 0.081183317 | 0.662123668 |
| putrescine.pcaac383          | 0.00116589   | 0.002662916 | 0.662202893 |

|                               |              |             |             |
|-------------------------------|--------------|-------------|-------------|
| pcaac322.pcaac360             | -0.013856394 | 0.031657762 | 0.662297802 |
| serine.alphaaminoadipicacid   | -0.000344854 | 0.00078799  | 0.662337868 |
| c141.pcaac320                 | -0.034341784 | 0.078470786 | 0.662338011 |
| histidine.smc161              | 0.032986272  | 0.07538456  | 0.662384664 |
| pcaec321.c4                   | -0.003989422 | 0.00911765  | 0.662401943 |
| c141oh.pcaec363               | -0.004927855 | 0.011265516 | 0.662489602 |
| pcaac344.pcaac323             | -0.027680159 | 0.06328495  | 0.662517777 |
| c16.smc240                    | -0.008437105 | 0.019289899 | 0.662521142 |
| c51.c4                        | 0.00402824   | 0.009212443 | 0.66261073  |
| pcaac344.smc202               | 0.014670162  | 0.033551146 | 0.662620175 |
| c51.acetylnithoine            | -0.00828657  | 0.018955444 | 0.662683319 |
| c181.threonine                | 0.010074752  | 0.023050614 | 0.662748118 |
| pcaec423.alphaaminoadipicacid | -0.001306184 | 0.002989949 | 0.662901868 |
| h1.c12                        | 0.006425317  | 0.014708969 | 0.662922458 |
| pcaec321.pcaac342             | 0.001951905  | 0.004469724 | 0.663020194 |
| pcaec403.pcaac384             | 0.016752751  | 0.038363543 | 0.663027884 |
| pcaac420.pcaac342             | 0.001502323  | 0.003440827 | 0.663076622 |
| pcaec322.pcaac406             | 0.013659952  | 0.031287707 | 0.663094803 |
| c2.alphaaminoadipicacid       | 0.000551918  | 0.001264329 | 0.663139166 |
| asparticacid.pcaac380         | 0.022721006  | 0.052049856 | 0.663143842 |
| smc180.pcaec423               | 0.006785874  | 0.015551712 | 0.663275046 |
| pcaac240.pcaec340             | -0.018941355 | 0.043435128 | 0.663462337 |
| lysopcac203.pcaac366          | -0.004245576 | 0.009737171 | 0.663510409 |
| phenylalanine.smc261          | 0.00778197   | 0.017852842 | 0.663598765 |
| pcaac360.smc240               | -0.025091164 | 0.057568213 | 0.663630813 |
| smohc141.smc180               | 0.040856514  | 0.09375041  | 0.663667074 |
| pcaac404.c4                   | -0.005778852 | 0.013262184 | 0.663711809 |
| c10.pcaec402                  | 0.029458713  | 0.067622186 | 0.66378586  |
| pcaac320.serine               | -0.009792085 | 0.02247966  | 0.663814275 |
| pcaac364.pcaec365             | -0.010807449 | 0.024813015 | 0.663844609 |
| c3.pcaac380                   | -0.025769686 | 0.059166787 | 0.663853702 |
| pcaec402.smc181               | 0.00197244   | 0.004528886 | 0.663867238 |
| c8.pcaec420                   | 0.007559576  | 0.017358234 | 0.663882206 |
| lysopcac181.smc202            | -0.016863177 | 0.038722534 | 0.663893998 |
| pcaec405.tryptophan           | -0.001598218 | 0.00367018  | 0.663913583 |
| c182.smc180                   | -0.006348241 | 0.014579737 | 0.663946185 |
| pcaec402.valine               | 0.011265992  | 0.025875682 | 0.663965113 |
| lysine.pcaec403               | -0.009978878 | 0.022921974 | 0.663999897 |
| smohc141.pcaac366             | 0.003305316  | 0.007592916 | 0.664018315 |
| pcaec405.smc181               | 0.003353091  | 0.007706987 | 0.664195046 |
| smohc241.c51                  | -0.014410402 | 0.033125349 | 0.664227767 |
| c3.pcaac364                   | -0.008999461 | 0.020689767 | 0.664267458 |
| pcaac381.pcaac383             | 0.002038573  | 0.004687391 | 0.664315189 |
| c8.pcaec446                   | -0.025026765 | 0.057547858 | 0.664329358 |
| pcaec401.c3                   | 0.011638619  | 0.026762626 | 0.664331403 |

|                                |              |             |             |
|--------------------------------|--------------|-------------|-------------|
| asparagine.pcaac341            | -0.002279671 | 0.005242077 | 0.664334279 |
| pcaac402.phenylalanine         | -0.031524901 | 0.072503684 | 0.664388735 |
| pcaac383.valine                | 0.024051319  | 0.055327971 | 0.664460865 |
| pcaec362.smohc222              | 0.003360164  | 0.007732174 | 0.664558943 |
| pcaac402.smc241                | 0.015903235  | 0.036597583 | 0.664577607 |
| pcaac281.lysine                | 0.019084909  | 0.043919563 | 0.66457833  |
| ornithine.c5                   | -0.004487427 | 0.010327872 | 0.664611288 |
| smc261.lysopcac180             | 0.022847799  | 0.05259661  | 0.664683727 |
| pcaac320.pcaac361              | 0.024710009  | 0.056903571 | 0.66479472  |
| lysopcac204.pcaec421           | -0.003043087 | 0.0070079   | 0.664799677 |
| pcaec424.kynurenine            | 0.001773081  | 0.004083243 | 0.664801943 |
| smohc141.lysopcac170           | 0.005088448  | 0.011718742 | 0.66481571  |
| isoleucine.lysopcac182         | -0.01127839  | 0.025975017 | 0.664825201 |
| pcaac344.acetylmethionine      | 0.003899954  | 0.008983526 | 0.664882118 |
| pcaec405.pcaac321              | 0.006315091  | 0.014547324 | 0.664893866 |
| c142.pcaec300                  | 0.012301149  | 0.028340528 | 0.664936393 |
| pcaac401.serine                | 0.037785833  | 0.087064849 | 0.664973732 |
| pcaec424.c162                  | 0.028568482  | 0.065843904 | 0.665056645 |
| pcaec406.pcaec386              | -0.009394468 | 0.021659577 | 0.665164731 |
| c10.pcaec420                   | 0.007643027  | 0.017621903 | 0.665171721 |
| smc260.smohc161                | -0.004912252 | 0.011328103 | 0.665236221 |
| c3.arginine                    | -0.017168838 | 0.039602217 | 0.665310007 |
| c181.pcaac321                  | 0.012408959  | 0.028629051 | 0.665377287 |
| pcaac402.pcaac320              | -0.039582644 | 0.091328241 | 0.665398025 |
| pcaec423.pcaec406              | 0.002501488  | 0.005772228 | 0.665430383 |
| c2.pcaec401                    | -0.01641033  | 0.037883387 | 0.665565171 |
| pcaac385.pcaac405              | 0.025319021  | 0.058453374 | 0.665587705 |
| pcaec360.c182                  | 0.016305387  | 0.037644131 | 0.665590224 |
| pcaec383.alphaaminoadipicacid  | -0.000728352 | 0.001681606 | 0.665602326 |
| c51dc.pcaac380                 | 0.020251246  | 0.046760367 | 0.665633585 |
| lysopcac161.pcaec361           | 0.002440259  | 0.005636013 | 0.665712972 |
| pcaec381.serotonin             | -0.03820146  | 0.088232889 | 0.665723466 |
| pcaec404.pcaec423              | 0.007477123  | 0.017271133 | 0.665749304 |
| c141.c182                      | 0.016612229  | 0.038378952 | 0.665806307 |
| pcaac364.pcaac281              | -0.000654001 | 0.001511216 | 0.665866357 |
| asparticacid.lysopcac170       | 0.010421001  | 0.024081675 | 0.665887223 |
| pcaac421.lysopcac281           | 0.006515538  | 0.015060964 | 0.665977672 |
| c10.pcaec446                   | -0.016390128 | 0.037888337 | 0.665992616 |
| alphaaminoadipicacid.ornithine | 0.012427232  | 0.028736818 | 0.666094449 |
| serotonin.pcaac383             | -0.001585305 | 0.003667175 | 0.666205991 |
| c102.valine                    | -0.02098813  | 0.048551437 | 0.666212869 |
| pcaac384.smc261                | 0.016028635  | 0.03708189  | 0.666239556 |
| pcaac381.pcaac406              | 0.010560771  | 0.024433024 | 0.666251292 |
| c51.c14                        | -0.014840489 | 0.034342915 | 0.666328749 |
| pcaec362.lysopcac204           | -0.010324239 | 0.023892187 | 0.666335181 |

|                                    |              |             |             |
|------------------------------------|--------------|-------------|-------------|
| pcaec425.smc240                    | 0.011077477  | 0.02563653  | 0.666349962 |
| pcaec443.pcaec365                  | 0.02327725   | 0.053876316 | 0.666384478 |
| methioninesulfoxide.pcaec424       | 0.007803535  | 0.018063014 | 0.666407983 |
| pcaec445.asymmetricdimethylarginir | 0.007251805  | 0.016787422 | 0.666436151 |
| pcaec403.c162                      | 0.033792908  | 0.078230301 | 0.666444491 |
| pcaec444.c142                      | 0.01496886   | 0.034655149 | 0.666465853 |
| pcaac363.ornithine                 | 0.015497315  | 0.035880555 | 0.666482896 |
| lysine.creatinine                  | -0.004919764 | 0.011394913 | 0.666601212 |
| pcaec406.c12                       | 0.015934978  | 0.036910583 | 0.666624729 |
| pcaec300.c102                      | -0.017764488 | 0.041151021 | 0.666645273 |
| alanine.smc181                     | 0.004287301  | 0.009931877 | 0.666659281 |
| smohc141.c3                        | -0.007461918 | 0.017290114 | 0.666731367 |
| pcaac322.glutamicacid              | -0.018032862 | 0.041787562 | 0.666756572 |
| pcaec360.pcaec362                  | 0.010940751  | 0.025353048 | 0.666757069 |
| pcaac322.c182                      | 0.017492649  | 0.040544104 | 0.666821247 |
| pcaac364.pcaac406                  | -0.012772147 | 0.029613854 | 0.666935709 |
| pcaac402.ornithine                 | 0.019982843  | 0.04636839  | 0.667175986 |
| lysopcac140.alphaaminoadipicacid   | -0.000956796 | 0.002220334 | 0.667200568 |
| pcaec322.h1                        | 0.000534403  | 0.001240402 | 0.667268776 |
| smc161.h1                          | 0.000431575  | 0.001001773 | 0.667283123 |
| pcaec422.histidine                 | 0.03140578   | 0.072902353 | 0.667296331 |
| pcaac402.c102                      | -0.015131775 | 0.035125929 | 0.667300642 |
| c12.smc161                         | -0.013972963 | 0.032442279 | 0.66736171  |
| pcaac323.pcaac420                  | 0.026521623  | 0.06157957  | 0.667371583 |
| smc161.pcaec422                    | 0.013456382  | 0.031249637 | 0.66742922  |
| c141oh.lysopcac203                 | -0.005011396 | 0.011638917 | 0.667455988 |
| glutamine.c51dc                    | -0.042131737 | 0.097863823 | 0.667498365 |
| asymmetricdimethylarginine.c51     | 0.027941488  | 0.064903559 | 0.667502805 |
| pcaac364.lysine                    | -0.025378838 | 0.058958925 | 0.667545116 |
| pcaec322.methioninesulfoxide       | 0.005697888  | 0.013237508 | 0.667555564 |
| pcaec340.pcaac405                  | 0.020013279  | 0.046504347 | 0.667615204 |
| pcaac420.histidine                 | 0.023417465  | 0.054417015 | 0.667629253 |
| serotonin.threonine                | 0.007706397  | 0.017908962 | 0.66764665  |
| smc260.pcaac381                    | 0.017459456  | 0.040574439 | 0.667648646 |
| pcaac386.pcaec425                  | -0.001491116 | 0.003465491 | 0.667671199 |
| pcaac320.pcaac403                  | 0.009130234  | 0.021224935 | 0.667751192 |
| c141.pcaec384                      | -0.015399146 | 0.03580356  | 0.667797982 |
| smc180.c142                        | -0.026782751 | 0.06230079  | 0.667947992 |
| smc240.alphaaminoadipicacid        | -0.001473606 | 0.003428701 | 0.668026773 |
| pcaac281.pcaac366                  | 0.003056121  | 0.007111025 | 0.668036508 |
| pcaac300.pcaac380                  | -0.016512482 | 0.038425202 | 0.668066805 |
| isoleucine.pcaec446                | -0.014168878 | 0.032988096 | 0.668223318 |
| isoleucine.threonine               | 0.008730417  | 0.020326427 | 0.668226393 |
| pcaac425.pcaec403                  | -0.007747395 | 0.0180424   | 0.668307144 |
| pcaac422.phenylalanine             | 0.010192776  | 0.023737681 | 0.668312338 |

|                            |              |             |             |
|----------------------------|--------------|-------------|-------------|
| pcaec443.pcaac323          | -0.022959767 | 0.053473392 | 0.668329884 |
| lysopcac160.lysopcac170    | 0.008362307  | 0.019479525 | 0.668388719 |
| c162.pcaec343              | 0.020622905  | 0.048040234 | 0.668390881 |
| glutamine.h1               | -0.000588898 | 0.001371841 | 0.668396821 |
| c5.pcaec420                | -0.010631857 | 0.024773676 | 0.668481312 |
| pcaac281.c14               | -0.01085799  | 0.025303703 | 0.668519575 |
| phenylalanine.pcaec425     | 0.000680106  | 0.001585037 | 0.668539722 |
| pcaac401.asparticacid      | 0.020471579  | 0.047713614 | 0.668559963 |
| smohc141.smohc241          | -0.044961314 | 0.104846421 | 0.668720322 |
| smohc221.isoleucine        | 0.007718274  | 0.018000099 | 0.668749074 |
| pcaec405.pcaec386          | -0.00310146  | 0.00723562  | 0.66886005  |
| smohc141.serotonin         | 0.031748982  | 0.074073747 | 0.668877931 |
| pcaac404.pcaec365          | 0.00925121   | 0.021588635 | 0.668943947 |
| pcaac386.pcaac366          | 0.015264106  | 0.035621109 | 0.668950704 |
| asparagine.smc240          | 0.034114349  | 0.07961477  | 0.668965371 |
| methioninesulfoxide.smc181 | 0.001467606  | 0.003425046 | 0.668965592 |
| glutamine.serotonin        | 0.019874553  | 0.046386578 | 0.668992885 |
| pcaec360.c51dc             | -0.049157254 | 0.114732631 | 0.668996022 |
| pcaac364.kynurenine        | -0.002853778 | 0.006661132 | 0.669016492 |
| lysopcac182.acetylnithoine | -0.01249099  | 0.029159833 | 0.669059662 |
| lysopcac140.pcaec444       | -0.031042635 | 0.072468082 | 0.669059669 |
| pcaec423.smohc241          | -0.026152883 | 0.061058148 | 0.669085361 |
| lysopcac182.pcaec401       | -0.018530733 | 0.04326472  | 0.669097707 |
| smohc161.pcaec406          | 0.00278611   | 0.006505417 | 0.669123217 |
| alanine.kynurenine         | -0.002909649 | 0.006793965 | 0.669127424 |
| pcaec363.smohc141          | 0.004043405  | 0.009443205 | 0.669191462 |
| pcaec361.smc260            | -0.011338394 | 0.026481146 | 0.669200764 |
| pcaac421.smc160            | -0.017800738 | 0.041574306 | 0.669202041 |
| pcaac383.tyrosine          | 0.024426301  | 0.057053364 | 0.669228215 |
| pcaac404.putrescine        | 0.019331642  | 0.045157727 | 0.669256682 |
| lysopcac281.c18            | 0.012391435  | 0.028951152 | 0.669314613 |
| c141oh.pcaac366            | 0.002683915  | 0.006271783 | 0.669370466 |
| serine.pcaec365            | 0.011050041  | 0.025830896 | 0.66948015  |
| lysopcac160.pcaec360       | -0.001874093 | 0.004381241 | 0.669501919 |
| alanine.pcaac343           | -0.007089778 | 0.016577332 | 0.669556276 |
| smc202.pcaac366            | 0.002825852  | 0.006608008 | 0.669584301 |
| pcaac300.c102              | 0.015519291  | 0.036291052 | 0.669588954 |
| pcaec421.lysopcac160       | 0.021665921  | 0.050664884 | 0.669590548 |
| pcaac342.smc160            | 0.026842721  | 0.062784868 | 0.669661031 |
| pcaec385.pcaac422          | -0.02291905  | 0.053612909 | 0.669692722 |
| pcaec444.serotonin         | 0.030207032  | 0.070665789 | 0.669713025 |
| pcaec362.pcaac320          | -0.035713174 | 0.083547718 | 0.66971659  |
| glutamine.threonine        | 0.015148056  | 0.035439635 | 0.669735326 |
| acetylnithoine.pcaac406    | 0.034454039  | 0.080634195 | 0.669840245 |
| pcaac343.acetylnithoine    | 0.003703927  | 0.008669308 | 0.669870898 |

|                                  |              |             |             |
|----------------------------------|--------------|-------------|-------------|
| pcaac300.pcaec343                | 0.028938599  | 0.067737424 | 0.669891752 |
| pcaec322.c162                    | -0.027338811 | 0.063995501 | 0.66990508  |
| smohc141.pcaec406                | 0.001522721  | 0.003564761 | 0.669933902 |
| glutamicacid.methionine          | -0.01068965  | 0.025028742 | 0.669980628 |
| pcaec380.smohc141                | -0.007826884 | 0.018328647 | 0.670027756 |
| pcaac404.pcaec341                | 0.023568654  | 0.055192451 | 0.670030172 |
| lysine.lysopcac180               | -0.020422405 | 0.047825341 | 0.670034669 |
| spermidine.c14                   | 0.067205943  | 0.157408255 | 0.670083704 |
| prolinr.asparticacid             | 0.011842001  | 0.027740215 | 0.670130052 |
| putrescine.tyrosine              | 0.015802223  | 0.037021272 | 0.670164655 |
| pcaac360.pcaec341                | -0.021210376 | 0.049697574 | 0.670202971 |
| pcaec340.pcaec361                | -0.004825774 | 0.011308957 | 0.670252051 |
| c3.pcaac361                      | -0.027987923 | 0.065593042 | 0.670274575 |
| pcaac385.pcaac383                | -0.001362916 | 0.003194878 | 0.670344715 |
| pcaac240.alphaaminoadipicacid    | -0.001063483 | 0.002493468 | 0.670407581 |
| alanine.c141oh                   | -0.040433912 | 0.094802826 | 0.67040908  |
| smohc161.pcaac321                | -0.007730242 | 0.018124924 | 0.670414493 |
| c101.asparticacid                | -0.012018445 | 0.028179928 | 0.670420551 |
| smohc241.c142                    | 0.016156101  | 0.03789551  | 0.670534443 |
| c181.pcaac342                    | 0.002114179  | 0.004959285 | 0.670552997 |
| pcaec361.pcaac342                | 0.002817061  | 0.006610753 | 0.670679596 |
| pcaac323.lysopcac160             | -0.004841857 | 0.011362635 | 0.670688421 |
| pcaec364.pcaac421                | -0.016905521 | 0.039680272 | 0.67074478  |
| citruiline.taurine               | -0.011922238 | 0.027985458 | 0.670765147 |
| pcaec300.c3                      | -0.008530919 | 0.020025977 | 0.670781735 |
| c3.pcaec362                      | -0.001942261 | 0.004559519 | 0.670791444 |
| lysopcac204.smc241               | 0.018237194  | 0.042816217 | 0.670819058 |
| lysopcac181.taurine              | -0.015882549 | 0.037288898 | 0.670825524 |
| pcaec300.pcaac363                | 0.003328986  | 0.007817382 | 0.670889753 |
| putrescine.creatinine            | 0.005854965  | 0.01375031  | 0.670917382 |
| pcaac380.pcaac424                | -0.003208197 | 0.007534748 | 0.67093126  |
| pcaac363.pcaec380                | 0.018269573  | 0.042917223 | 0.670999347 |
| pcaac384.pcaac323                | -0.027592442 | 0.064834636 | 0.671080391 |
| pcaec322.lysine                  | -0.028692194 | 0.067419377 | 0.671083272 |
| pcaec443.pcaac406                | 0.01855333   | 0.043598106 | 0.671100915 |
| pcaac322.c51                     | -0.026236201 | 0.061658484 | 0.671133792 |
| pcaac240.c141                    | -0.027386977 | 0.064366249 | 0.671149614 |
| pcaec380.pcaec361                | -0.010746165 | 0.025256202 | 0.67114993  |
| citruiline.serine                | -0.019280148 | 0.045314164 | 0.67115638  |
| pcaec443.lysopcac182             | -0.023934323 | 0.056253408 | 0.671159282 |
| pcaec386.pcaac362                | -0.009598546 | 0.022561697 | 0.671186785 |
| alanine.pcaac422                 | -0.004581459 | 0.01077003  | 0.671220126 |
| lysopcac204.alphaaminoadipicacid | 0.001423537  | 0.00334648  | 0.671224737 |
| pcaec341.pcaec425                | -0.00142295  | 0.003345144 | 0.671228692 |
| pcaac401.smc181                  | 0.00177143   | 0.004164705 | 0.671253763 |

|                                     |              |             |             |
|-------------------------------------|--------------|-------------|-------------|
| pcaec443.c181                       | -0.009600765 | 0.022575103 | 0.671299026 |
| pcaac342.lysopcac204                | -0.008243024 | 0.019383215 | 0.671309952 |
| pcaec406.asparagine                 | -0.005442737 | 0.012799315 | 0.671331376 |
| pcaac342.pcaec406                   | 0.001613201  | 0.003795113 | 0.671450155 |
| pcaec365.serine                     | 0.038944245  | 0.091656865 | 0.671582172 |
| creatinine.pcaac342                 | -0.001551205 | 0.003651039 | 0.671600459 |
| smohc221.smohc141                   | 0.02120991   | 0.04992847  | 0.671644581 |
| pcaac420.pcaac321                   | -0.014774034 | 0.034778545 | 0.671646629 |
| pcaec401.pcaac361                   | -0.025610138 | 0.060287697 | 0.671649808 |
| c51.pcaec405                        | -0.020938797 | 0.049299872 | 0.671704789 |
| pcaec343.c3                         | -0.012071778 | 0.028423369 | 0.671712081 |
| smc202.serotonin                    | 0.032111268  | 0.075621748 | 0.671772481 |
| pcaec403.c12                        | 0.033488518  | 0.078876217 | 0.671815788 |
| arginine.c18                        | -0.025665932 | 0.060453978 | 0.671828367 |
| c18.pcaec386                        | -0.002658421 | 0.006261935 | 0.671840429 |
| lysopcac160.pcaec386                | 0.002645325  | 0.006231245 | 0.671848292 |
| pcaec403.threonine                  | -0.010112933 | 0.023825317 | 0.671894999 |
| pcaec423.pcaec425                   | -0.001350415 | 0.003181732 | 0.671919629 |
| pcaac406.pcaec446                   | -0.0247596   | 0.058347981 | 0.671980759 |
| serine.pcaac342                     | 0.002312352  | 0.005450009 | 0.672024194 |
| pcaec363.pcaec380                   | 0.008463696  | 0.019952319 | 0.672088145 |
| asymmetricdimethylarginine.pcaac36  | 0.003500703  | 0.008253511 | 0.672123808 |
| pcaac383.pcaac300                   | 0.024835615  | 0.058560004 | 0.672154127 |
| pcaac363.pcaec405                   | -0.024359818 | 0.05743838  | 0.672155524 |
| pcaac281.h1                         | 0.000515849  | 0.00121651  | 0.672201534 |
| smc240.smc161                       | 0.046290995  | 0.109170402 | 0.672212526 |
| pcaac422.pcaac380                   | 0.025253654  | 0.059571559 | 0.672288062 |
| pcaec380.smc240                     | 0.015524001  | 0.036631158 | 0.672381956 |
| c182.smc161                         | -0.01942389  | 0.045839574 | 0.672422698 |
| c0.pcaac322                         | -0.018795987 | 0.044359367 | 0.672433946 |
| pcaac366.c102                       | 0.014203     | 0.033520917 | 0.672445021 |
| pcaec446.pcaec340                   | -0.010287547 | 0.024281872 | 0.672469532 |
| asymmetricdimethylarginine.tryptopl | -0.003851682 | 0.009091254 | 0.6724717   |
| asymmetricdimethylarginine.pcaec44  | -0.037758992 | 0.089138295 | 0.672521768 |
| c101.pcaec422                       | 0.010127864  | 0.023910677 | 0.672543131 |
| pcaac406.pcaec425                   | -0.001730545 | 0.004085676 | 0.672548142 |
| pcaac386.smohc141                   | -0.006872695 | 0.016234065 | 0.672703624 |
| pcaec360.pcaac321                   | 0.013962937  | 0.032988914 | 0.672768191 |
| c0.pcaec423                         | 0.012671217  | 0.029938046 | 0.672778031 |
| pcaec422.glutamicacid               | -0.020854436 | 0.049281596 | 0.672835615 |
| pcaac322.smc161                     | -0.025111913 | 0.059349915 | 0.672873899 |
| pcaec406.pcaac300                   | -0.020444889 | 0.04832191  | 0.672887392 |
| pcaec421.acetylnithoine             | -0.014576643 | 0.034452391 | 0.672889169 |
| c2.pcaac320                         | -0.012876219 | 0.030435795 | 0.67291359  |
| putrescine.arginine                 | 0.006676853  | 0.015782274 | 0.672914652 |

|                               |              |             |             |
|-------------------------------|--------------|-------------|-------------|
| prolinr.pcaac342              | -0.002394079 | 0.005659661 | 0.672952994 |
| pcaac406.smc240               | 0.009636906  | 0.022782257 | 0.672958148 |
| pcaec385.serine               | -0.028063614 | 0.066347502 | 0.672973636 |
| pcaac322.lysopcac280          | 0.002625017  | 0.006207173 | 0.673030907 |
| asparagine.pcaac342           | -0.001699892 | 0.004020244 | 0.673079953 |
| pcaac386.pcaac322             | 0.021846501  | 0.051677861 | 0.673144908 |
| pcaac341.c18                  | 0.014275035  | 0.033770942 | 0.673175622 |
| pcaac240.pcaac363             | -0.005180839 | 0.012256983 | 0.673187989 |
| phenylalanine.histidine       | -0.030232539 | 0.071525932 | 0.673191852 |
| pcaec446.pcaac342             | 0.000947705  | 0.002242205 | 0.673201277 |
| pcaac363.pcaac362             | 0.007270912  | 0.017206846 | 0.67327932  |
| glycine.lysopcac180           | -0.018363951 | 0.043459404 | 0.673283054 |
| pcaec445.pcaec365             | 0.007047484  | 0.016686725 | 0.673438373 |
| c5.pcaec384                   | 0.019188887  | 0.045453626 | 0.67356704  |
| pcaec364.pcaec384             | 0.044769874  | 0.106072351 | 0.673636095 |
| pcaac421.smohc141             | -0.010798712 | 0.025585606 | 0.673641334 |
| creatinine.pcaec301           | -0.022400942 | 0.053075929 | 0.673646709 |
| smc161.c102                   | 0.008600298  | 0.020378843 | 0.673671269 |
| smc202.serine                 | -0.016585541 | 0.039304382 | 0.673703314 |
| c4.lysine                     | 0.028922296  | 0.06855508  | 0.673770909 |
| leucine.pcaec364              | -0.005288876 | 0.012536557 | 0.673776587 |
| c14.smc241                    | -0.028040112 | 0.06646763  | 0.673787583 |
| pcaec341.pcaac342             | 0.00088079   | 0.002088399 | 0.673866077 |
| pcaec445.pcaac342             | 0.000846797  | 0.002007893 | 0.673879958 |
| pcaec420.c51                  | -0.038300057 | 0.090829131 | 0.673925699 |
| smohc221.phenylalanine        | -0.018768256 | 0.044522203 | 0.674015489 |
| pcaec406.pcaec380             | 0.019940235  | 0.047311457 | 0.674074377 |
| c182.pcaac384                 | 0.016043055  | 0.038066688 | 0.674089903 |
| pcaac403.pcaac363             | -0.006178835 | 0.014663577 | 0.674143118 |
| pcaac323.phenylalanine        | -0.010910432 | 0.025902454 | 0.674260146 |
| pcaec404.lysopcac280          | 0.00296296   | 0.007037688 | 0.674405154 |
| c162.pcaec403                 | 0.009127638  | 0.021685626 | 0.67448234  |
| pcaec383.c4                   | -0.008616262 | 0.020471104 | 0.674488541 |
| pcaec404.lysopcac182          | -0.014608248 | 0.034708111 | 0.674495946 |
| pcaec445.c142                 | 0.009803629  | 0.02330318  | 0.674633936 |
| pcaac300.lysopcac160          | -0.006155351 | 0.014635867 | 0.674730858 |
| serine.c4                     | 0.008301305  | 0.01974851  | 0.674887669 |
| pcaac381.alphaaminoadipicacid | -0.000622107 | 0.001480201 | 0.674935389 |
| pcaac380.smc241               | 0.007427839  | 0.017679427 | 0.675041219 |
| c16.alanine                   | 0.009870716  | 0.023502558 | 0.675154537 |
| serine.lysopcac140            | 0.000560421  | 0.001334427 | 0.675164615 |
| pcaec360.pcaec322             | 0.020684643  | 0.049264336 | 0.675237773 |
| serotonin.pcaec384            | 0.007163411  | 0.017062193 | 0.675259169 |
| smohc222.h1                   | 0.000489692  | 0.001166697 | 0.675343893 |
| pcaec361.glycine              | 0.008187543  | 0.019510391 | 0.675398206 |



|                                     |              |             |             |
|-------------------------------------|--------------|-------------|-------------|
| pcaec425.c18                        | -0.012671137 | 0.030194951 | 0.675402695 |
| smc240.pcaec384                     | 0.00842451   | 0.020076224 | 0.675415831 |
| pcaac366.pcaac381                   | 0.017603048  | 0.041956946 | 0.675471195 |
| asymmetricdimethylarginine.pcaac40  | -0.001323338 | 0.003154996 | 0.675549993 |
| pcaec423.histidine                  | 0.030543352  | 0.072819309 | 0.67555136  |
| pcaec383.pcaac240                   | 0.006552178  | 0.015624108 | 0.675607453 |
| pcaec386.valine                     | -0.023231132 | 0.055406969 | 0.675666912 |
| c141oh.pcaec385                     | -0.014530399 | 0.034657159 | 0.675681965 |
| smc180.pcaac406                     | -0.012419642 | 0.029624586 | 0.67570153  |
| smohc161.pcaac300                   | 0.018101329  | 0.043190148 | 0.675793726 |
| smc261.acetylmethionine             | -0.006387097 | 0.015240832 | 0.675815475 |
| pcaec386.smc161                     | -0.029267941 | 0.069839803 | 0.675819465 |
| c102.phenylalanine                  | 0.016077075  | 0.038366823 | 0.675846181 |
| smc180.c2                           | 0.021324272  | 0.050891151 | 0.675859733 |
| pcaec380.alphaaminoadipicacid       | -0.001120548 | 0.002674293 | 0.675866931 |
| pcaac321.asymmetricdimethylarginine | -0.011996234 | 0.02863402  | 0.675908487 |
| pcaac403.pcaec422                   | 0.026036899  | 0.062165624 | 0.675995445 |
| lysopcac181.c141                    | -0.008121433 | 0.019392338 | 0.676021079 |
| lysopcac181.pcaec446                | -0.011561648 | 0.027607574 | 0.676028812 |
| lysopcac160.threonine               | 0.006949221  | 0.01659383  | 0.676030221 |
| pcaac405.lysopcac203                | 0.007972915  | 0.019047034 | 0.676170629 |
| methionine.asparticacid             | 0.015307619  | 0.036577036 | 0.676234335 |
| pcaec385.smc202                     | 0.010896403  | 0.026038284 | 0.676254236 |
| pcaec384.pcaac240                   | 0.006031324  | 0.014414061 | 0.676285493 |
| c4.pcaec421                         | 0.000301677  | 0.000721001 | 0.676299109 |
| pcaec423.pcaac344                   | -0.020864776 | 0.049868104 | 0.676310397 |
| pcaac420.c3                         | -0.009607856 | 0.022966227 | 0.676348342 |
| serotonin.pcaec382                  | 0.004084353  | 0.009763495 | 0.676361592 |
| c102.alphaaminoadipicacid           | 0.001501791  | 0.003590858 | 0.676436485 |
| kynurenine.c102                     | 0.018640912  | 0.044577751 | 0.676480294 |
| pcaac405.pcaac344                   | 0.020193117  | 0.048295227 | 0.676515296 |
| pcaec363.pcaec301                   | -0.016377819 | 0.03917245  | 0.676532011 |
| pcaec341.pcaec363                   | -0.017805562 | 0.042590869 | 0.676557389 |
| c181.serine                         | 0.009055978  | 0.02166597  | 0.676614929 |
| pcaec421.alphaaminoadipicacid       | -0.002060767 | 0.004933441 | 0.676810231 |
| pcaac361.pcaac381                   | -0.011675931 | 0.027952224 | 0.676812891 |
| phenylalanine.c8                    | 0.013951992  | 0.03340484  | 0.676846808 |
| pcaac422.lysopcac161                | 0.023097365  | 0.055303881 | 0.67686083  |
| pcaec420.tryptophan                 | 0.002853339  | 0.006832704 | 0.67689311  |
| glycine.pcaac383                    | -0.001438394 | 0.003445251 | 0.676965878 |
| pcaac380.acetylmethionine           | -0.006528935 | 0.015639769 | 0.676997499 |
| lysopcac170.pcaac323                | 0.024722896  | 0.0592248   | 0.677008883 |
| pcaac420.pcaac361                   | -0.022208914 | 0.053203793 | 0.677016611 |
| c181.glutamine                      | -0.007581195 | 0.01816575  | 0.677086986 |
| pcaec343.methioninesulfoxide        | 0.004963377  | 0.01189348  | 0.677098201 |

|                                    |              |             |             |
|------------------------------------|--------------|-------------|-------------|
| pcaac366.methioninesulfoxide       | 0.008952605  | 0.021453924 | 0.677116194 |
| pcaec401.pcaac426                  | -0.029679022 | 0.071123539 | 0.677120722 |
| pcaac406.pcaec343                  | -0.027900005 | 0.066871963 | 0.677174014 |
| smc260.pcaac343                    | -0.011688927 | 0.028036471 | 0.677390464 |
| pcaac422.c162                      | 0.022484975  | 0.053941389 | 0.677447216 |
| c5.pcaac365                        | 0.00843879   | 0.020247021 | 0.677483106 |
| pcaac343.tyrosine                  | 0.021063852  | 0.050547846 | 0.677541856 |
| c101.c141oh                        | -0.035875469 | 0.086129618 | 0.677674932 |
| pcaec443.phenylalanine             | -0.024117023 | 0.057905766 | 0.677705149 |
| smohc241.pcaac281                  | -0.000725009 | 0.001741178 | 0.677776229 |
| smc202.pcaec405                    | -0.008722526 | 0.020951621 | 0.677829179 |
| isoleucine.pcaac365                | -0.011878458 | 0.028532351 | 0.677830671 |
| pcaec421.putrescine                | -0.018104245 | 0.043486885 | 0.677830963 |
| pcaec385.smc241                    | -0.010095806 | 0.024251794 | 0.677848454 |
| pcaac360.pcaac240                  | -0.006022596 | 0.01447354  | 0.677980063 |
| lysopcac170.c182                   | 0.010011425  | 0.024062255 | 0.678014607 |
| pcaac386.pcaec401                  | -0.011173472 | 0.026855451 | 0.678017329 |
| smc261.pcaec421                    | 0.000878633  | 0.002112805 | 0.678162451 |
| pcaec384.c8                        | -0.016763411 | 0.040311582 | 0.678173344 |
| smc261.pcaac320                    | 0.012995424  | 0.031250777 | 0.678175366 |
| glutamicacid.pcaec406              | -0.00351566  | 0.008454391 | 0.678178892 |
| pcaec380.h1                        | 0.00066881   | 0.001608475 | 0.678204096 |
| phenylalanine.methioninesulfoxide  | 0.00739235   | 0.017778546 | 0.678205694 |
| pcaec364.pcaac323                  | -0.029450853 | 0.070837508 | 0.678241797 |
| pcaac365.pcaec406                  | 0.00408642   | 0.009829707 | 0.678264282 |
| pcaec342.pcaec341                  | 0.046685819  | 0.112305104 | 0.678276125 |
| pcaac421.pcaac344                  | -0.011852452 | 0.028516815 | 0.678330836 |
| alanine.glycine                    | -0.014987869 | 0.036067741 | 0.67839109  |
| smohc161.ornithine                 | -0.00827502  | 0.01991942  | 0.678480916 |
| smc160.methioninesulfoxide         | 0.003813194  | 0.00917938  | 0.678492665 |
| asymmetricdimethylarginine.pcaac36 | 0.026459693  | 0.063695611 | 0.678492828 |
| pcaec443.pcaac342                  | 0.00489129   | 0.011775275 | 0.678508868 |
| pcaec446.pcaac344                  | -0.018121135 | 0.043627043 | 0.678524735 |
| pcaac421.pcaec365                  | -0.012734567 | 0.030659235 | 0.678529445 |
| c2.pcaec425                        | -0.001429579 | 0.003442187 | 0.678563822 |
| pcaec361.alphaaminoadipicacid      | -0.000605201 | 0.001457315 | 0.678583262 |
| pcaac343.isoleucine                | -0.006997274 | 0.016850588 | 0.678605596 |
| smc160.acetylmithoine              | -0.008369171 | 0.020157514 | 0.678653328 |
| glutamicacid.c141                  | -0.016117911 | 0.038821447 | 0.678659201 |
| leucine.valine                     | 0.028791098  | 0.069356704 | 0.678706151 |
| lysopcac182.lysopcac204            | -0.006022074 | 0.014507217 | 0.678711576 |
| putrescine.serotonin               | 0.030455913  | 0.073391955 | 0.678808477 |
| c16.pcaac384                       | -0.004676512 | 0.011271618 | 0.678869422 |
| pcaec361.pcaac300                  | -0.026009524 | 0.062692249 | 0.678881465 |
| prolinr.pcaec385                   | -0.016677078 | 0.040206048 | 0.678944237 |

|                                |              |             |             |
|--------------------------------|--------------|-------------|-------------|
| c51dc.c51                      | -0.0125525   | 0.030267444 | 0.678995911 |
| spermidine.methioninesulfoxide | -0.006533045 | 0.015755348 | 0.679042522 |
| asparticacid.pcaec402          | -0.041311912 | 0.099670514 | 0.679167373 |
| pcaec382.c14                   | 0.02838382   | 0.068494137 | 0.679230912 |
| pcaac342.lysopcac140           | 0.000327953  | 0.000791533 | 0.679282892 |
| acetylmithoine.pcaec445        | 0.018657211  | 0.045059918 | 0.679482537 |
| c102.c16                       | -0.009339493 | 0.022563364 | 0.679577852 |
| lysopcac170.c18                | -0.020931594 | 0.050576596 | 0.679624337 |
| pcaec301.creatinine            | -0.003745409 | 0.009050278 | 0.679635094 |
| c4.c8                          | 0.014727151  | 0.035588207 | 0.679652241 |
| smc260.pcaac300                | 0.02579292   | 0.062337233 | 0.679693761 |
| acetylmithoine.pcaac300        | 0.029213076  | 0.070604205 | 0.679698121 |
| pcaec446.lysopcac204           | -0.008986372 | 0.021723966 | 0.679768736 |
| pcaac361.pcaac384              | -0.030974918 | 0.074881382 | 0.679774969 |
| c142.pcaec342                  | 0.018293375  | 0.044231382 | 0.679825764 |
| pcaec362.smohc141              | 0.012571817  | 0.030409021 | 0.679942445 |
| c12.lysopcac180                | 0.015970766  | 0.038632535 | 0.679958509 |
| pcaec321.serine                | -0.004563359 | 0.011039272 | 0.679978212 |
| c141.pcaec403                  | 0.009303845  | 0.022508278 | 0.6799949   |
| pcaac402.smc181                | 0.001514501  | 0.003664384 | 0.680030712 |
| c14.pcaac384                   | 0.024791731  | 0.059998655 | 0.680102609 |
| smohc141.pcaac383              | 0.001969218  | 0.00476767  | 0.680226261 |
| pcaac361.c141oh                | 0.026781974  | 0.064861693 | 0.680318827 |
| pcaac240.lysopcac180           | 0.023124447  | 0.056009902 | 0.680352009 |
| alanine.pcaac404               | -0.001972542 | 0.004777798 | 0.680357568 |
| smohc161.pcaec386              | 0.003909494  | 0.009469574 | 0.680363455 |
| pcaec403.lysine                | 0.031735387  | 0.076869823 | 0.68036496  |
| pcaec443.c51                   | -0.026274048 | 0.063644007 | 0.680377772 |
| pcaac425.pcaec365              | -0.011495453 | 0.027851185 | 0.680438258 |
| methioninesulfoxide.c102       | -0.019240438 | 0.046630125 | 0.680531366 |
| pcaec404.pcaec386              | -0.002039116 | 0.004941943 | 0.680534258 |
| c10.pcaec342                   | 0.021590908  | 0.052336713 | 0.680589636 |
| glutamine.phenylalanine        | -0.013354344 | 0.032379934 | 0.680671471 |
| pcaec322.c102                  | 0.009921694  | 0.024058122 | 0.680687105 |
| smc180.pcaec386                | 0.002873827  | 0.006968692 | 0.680697353 |
| pcaac240.c18                   | -0.01850251  | 0.044867135 | 0.680702236 |
| pcaec340.c4                    | -0.00377986  | 0.009168823 | 0.680799533 |
| pcaec381.pcaec406              | 0.006308254  | 0.01530241  | 0.680808412 |
| arginine.c14                   | -0.009368703 | 0.022726933 | 0.680815826 |
| pcaac421.pcaac281              | -0.000974053 | 0.002363253 | 0.680861851 |
| pcaec420.lysopcac161           | -0.025911076 | 0.062870908 | 0.680887255 |
| c16.pcaac342                   | -0.004982102 | 0.012089328 | 0.680904809 |
| pcaac420.pcaec343              | 0.038617857  | 0.093710459 | 0.680911963 |
| pcaec383.pcaac406              | -0.023130772 | 0.056130818 | 0.680919837 |
| pcaec402.lysopcac140           | -0.000344883 | 0.000836937 | 0.680926526 |

|                               |              |             |             |
|-------------------------------|--------------|-------------|-------------|
| pcaac386.pcaec422             | 0.007790357  | 0.018905866 | 0.680939262 |
| glutamine.pcaec425            | 0.002285931  | 0.005548618 | 0.680996448 |
| leucine.pcaac422              | 0.013824406  | 0.033556778 | 0.681004829 |
| pcaac320.lysopcac140          | 0.000297055  | 0.000721143 | 0.681039526 |
| c0.pcaac385                   | 0.009121011  | 0.022146681 | 0.681096293 |
| pcaac422.alphaaminoadipicacid | -0.001621309 | 0.003937242 | 0.681138253 |
| pcaac342.smc202               | -0.010008141 | 0.024304891 | 0.681148032 |
| pcaec444.c51dc                | -0.042274832 | 0.102681349 | 0.681196158 |
| leucine.pcaec444              | -0.030461071 | 0.07400212  | 0.681258079 |
| pcaec321.smc241               | -0.003498572 | 0.008499854 | 0.681273078 |
| pcaac342.pcaac426             | 0.019147859  | 0.046540897 | 0.681407435 |
| lysopcac160.pcaec380          | 0.017734869  | 0.043112955 | 0.681452677 |
| c102.methionine               | -0.021391444 | 0.052010637 | 0.681502725 |
| pcaec382.c101                 | 0.00817174   | 0.019870837 | 0.68153705  |
| pcaec404.smohc141             | -0.007491034 | 0.018219642 | 0.68160385  |
| c101.pcaac321                 | 0.006101684  | 0.014842334 | 0.681641511 |
| pcaec444.pcaac342             | 0.001422302  | 0.003460011 | 0.681664456 |
| pcaac384.pcaec382             | 0.001707146  | 0.004154109 | 0.681748645 |
| pcaac384.smc160               | 0.037667658  | 0.091671168 | 0.681788055 |
| smohc161.lysopcac181          | 0.017392333  | 0.042330888 | 0.68181254  |
| pcaac323.pcaec385             | -0.016440516 | 0.04002082  | 0.681861691 |
| pcaec422.pcaac322             | 0.025398329  | 0.061841462 | 0.681933688 |
| pcaec403.valine               | 0.010429208  | 0.025406049 | 0.682079773 |
| smohc141.lysopcac280          | 0.002930566  | 0.00714253  | 0.682228289 |
| pcaac380.c16                  | 0.016986716  | 0.041403661 | 0.682248144 |
| smc241.alphaaminoadipicacid   | -0.001262894 | 0.003078486 | 0.68227657  |
| smohc221.pcaec386             | 0.006247788  | 0.01523147  | 0.682307739 |
| asparagine.c51                | -0.02670132  | 0.065097443 | 0.682318564 |
| pcaec380.pcaac240             | -0.006599    | 0.016091704 | 0.682382627 |
| pcaec382.c51dc                | -0.055176814 | 0.134557774 | 0.682402164 |
| c18.c8                        | 0.018869818  | 0.046018723 | 0.682412312 |
| pcaac381.pcaac360             | 0.019545612  | 0.047668706 | 0.682424221 |
| pcaec322.pcaec406             | 0.002391203  | 0.005832455 | 0.68245942  |
| pcaec365.c142                 | 0.012681523  | 0.030941421 | 0.682551834 |
| pcaec342.pcaac381             | -0.012444684 | 0.030364166 | 0.682557823 |
| pcaec446.pcaac364             | -0.014851944 | 0.036240601 | 0.682581716 |
| alphaaminoadipicacid.smohc141 | -0.003577356 | 0.008732306 | 0.682688582 |
| smc202.smc240                 | -0.012097574 | 0.02953433  | 0.682731367 |
| pcaec343.pcaec425             | -0.001053211 | 0.002572235 | 0.682846222 |
| pcaac383.c18                  | 0.011027171  | 0.026939999 | 0.682941605 |
| c0.creatinine                 | 0.007933269  | 0.019383547 | 0.682974468 |
| citruiline.pcaec425           | 0.004530584  | 0.011075484 | 0.683131345 |
| pcaac424.serotonin            | -0.03438139  | 0.084058014 | 0.683163854 |
| pcaec446.pcaec423             | -0.009724464 | 0.023777632 | 0.683196404 |
| lysopcac180.pcaac240          | -0.005767981 | 0.014104239 | 0.683212186 |

|                                    |              |             |             |
|------------------------------------|--------------|-------------|-------------|
| pcaac401.alphaaminoadipicacid      | -0.000642253 | 0.001570836 | 0.683280481 |
| pcaac320.pcaec401                  | 0.019295922  | 0.047200066 | 0.683316453 |
| pcaac342.smohc141                  | 0.002378543  | 0.005821149 | 0.683468421 |
| phenylalanine.pcaac240             | -0.004469725 | 0.010946935 | 0.683684736 |
| smohc241.alphaaminoadipicacid      | -0.000832991 | 0.00204039  | 0.68372674  |
| lysopcac182.c101                   | -0.002925508 | 0.00716669  | 0.683757425 |
| pcaec420.glycine                   | 0.017304647  | 0.042393405 | 0.683770012 |
| lysopcac204.pcaac364               | 0.015287479  | 0.037457379 | 0.683815409 |
| pcaec342.pcaac422                  | -0.007017459 | 0.017195296 | 0.683834856 |
| asparticacid.pcaac404              | -0.003996556 | 0.009794139 | 0.683869632 |
| lysopcac181.pcaac344               | -0.021039239 | 0.051561026 | 0.683877357 |
| pcaac341.lysine                    | 0.024964042  | 0.061182685 | 0.683892559 |
| c141oh.alphaaminoadipicacid        | 0.001115015  | 0.002733608 | 0.683990195 |
| serotonin.pcaec343                 | 0.032204744  | 0.07897711  | 0.68407676  |
| c102.c10                           | -0.007028421 | 0.017236859 | 0.68408979  |
| lysopcac181.pcaac422               | -0.014763688 | 0.036210575 | 0.684117454 |
| pcaac385.c16                       | 0.011282966  | 0.027674322 | 0.684126511 |
| lysopcac160.alphaaminoadipicacid   | -0.001069419 | 0.002623575 | 0.684189682 |
| pcaac300.pcaac406                  | -0.01561889  | 0.038321185 | 0.684219355 |
| pcaac403.c0                        | 0.000449141  | 0.001102035 | 0.684235983 |
| pcaec422.smc181                    | 0.002707508  | 0.006644345 | 0.684283796 |
| pcaac384.pcaac322                  | 0.015697283  | 0.03852196  | 0.684284751 |
| pcaec380.pcaac320                  | -0.031153072 | 0.076458375 | 0.684312443 |
| glutamicacid.smohc141              | -0.006077167 | 0.014918287 | 0.684376782 |
| lysopcac203.pcaac323               | 0.037583789  | 0.092301035 | 0.684506096 |
| glutamine.lysopcac203              | -0.002344316 | 0.005758091 | 0.68454478  |
| pcaec385.lysopcac281               | 0.004202247  | 0.010323213 | 0.684593546 |
| histidine.pcaec380                 | -0.016364902 | 0.040202541 | 0.684598188 |
| lysopcac180.c5                     | -0.004835505 | 0.011881391 | 0.684656797 |
| pcaec360.lysopcac281               | -0.00630631  | 0.015495677 | 0.68466353  |
| c51.smohc241                       | -0.013227148 | 0.032517624 | 0.684812727 |
| lysopcac182.pcaac386               | 0.013050226  | 0.032090561 | 0.684885946 |
| asparagine.c162                    | -0.023831626 | 0.058606056 | 0.684906221 |
| pcaec380.ornithine                 | -0.018167274 | 0.044677366 | 0.684912372 |
| pcaac383.threonine                 | 0.007184601  | 0.017670887 | 0.684952083 |
| c4.pcaec406                        | -0.003612421 | 0.008886568 | 0.685006971 |
| pcaec382.c4                        | -0.008212629 | 0.020204008 | 0.685020458 |
| smohc141.pcaec422                  | -0.007363816 | 0.018116892 | 0.68503788  |
| c8.pcaac380                        | 0.017726843  | 0.043613652 | 0.685044963 |
| asymmetricdimethylarginine.lysopca | 0.006219029  | 0.015302125 | 0.685071082 |
| pcaac405.pcaac381                  | -0.013795595 | 0.033948372 | 0.685104946 |
| c5.taurine                         | -0.014256792 | 0.035090562 | 0.685166659 |
| glycine.c102                       | 0.024106698  | 0.059353656 | 0.685263479 |
| pcaec365.h1                        | -0.000566661 | 0.001395228 | 0.685271476 |
| pcaec422.c162                      | 0.021591316  | 0.053163653 | 0.685281267 |

|                               |              |             |             |
|-------------------------------|--------------|-------------|-------------|
| pcaac403.pcaac424             | -0.00744982  | 0.018343551 | 0.685282579 |
| c12.pcaac421                  | 0.004664162  | 0.011484602 | 0.685285797 |
| pcaec361.pcaec406             | 0.002619844  | 0.006451861 | 0.685331859 |
| smc160.lysopcac161            | -0.025743099 | 0.063399774 | 0.685343766 |
| pcaec363.lysopcac170          | -0.002555724 | 0.006295341 | 0.68539744  |
| kynurenine.pcaac422           | -0.014663576 | 0.036122004 | 0.685415763 |
| smohc221.alphaaminoadipicacid | -0.001433947 | 0.003532776 | 0.685450687 |
| pcaec404.pcaac364             | 0.013759488  | 0.033902955 | 0.685486556 |
| phenylalanine.pcaac384        | -0.028909056 | 0.071253154 | 0.685578962 |
| phenylalanine.pcaac366        | 0.013051904  | 0.032171667 | 0.68559918  |
| prolinr.c8                    | 0.010463021  | 0.025790915 | 0.685606005 |
| pcaac401.pcaec404             | -0.013569185 | 0.033448964 | 0.685619174 |
| lysopcac280.pcaec422          | -0.008777896 | 0.021639238 | 0.685634665 |
| pcaac404.pcaec423             | 0.004013225  | 0.009894156 | 0.685657785 |
| c10.transhydroxyproline       | 0.011128748  | 0.027441889 | 0.685714201 |
| c8.pcaec301                   | -0.020527727 | 0.050623328 | 0.685743039 |
| pcaec423.pcaac402             | 0.029468033  | 0.072689695 | 0.68581962  |
| pcaec364.pcaac363             | 0.003314905  | 0.00818099  | 0.685965453 |
| prolinr.pcaac362              | -0.005599106 | 0.013820092 | 0.686004741 |
| lysopcac181.c51dc             | -0.043946052 | 0.108500824 | 0.686087449 |
| pcaec403.lysopcac140          | 0.000828764  | 0.002046504 | 0.686134485 |
| h1.smc181                     | 0.00205903   | 0.005084489 | 0.686136371 |
| pcaec341.c4                   | -0.004523091 | 0.011171053 | 0.686186992 |
| pcaec362.pcaec421             | 0.00110729   | 0.002734795 | 0.686190306 |
| smc180.pcaec383               | 0.019104231  | 0.047191288 | 0.686237251 |
| pcaec363.lysine               | -0.023029543 | 0.056889085 | 0.686245024 |
| pcaac403.lysine               | 0.029428717  | 0.072697508 | 0.686248139 |
| c10.asparticacid              | -0.008538333 | 0.021098085 | 0.686331339 |
| prolinr.lysopcac204           | -0.005194017 | 0.012843084 | 0.686533596 |
| pcaec444.acetylmethionine     | -0.023674324 | 0.058558152 | 0.686631819 |
| pcaac424.pcaec423             | 0.033514801  | 0.082909648 | 0.686671872 |
| pcaec386.methionine           | -0.008153972 | 0.02017563  | 0.686732937 |
| pcaac402.histidine            | -0.034879491 | 0.08630539  | 0.686739703 |
| pcaec425.c12                  | 0.01598021   | 0.039558963 | 0.686872545 |
| pcaac240.smohc161             | -0.017020243 | 0.04213465  | 0.686880193 |
| c14.smohc161                  | 0.003290362  | 0.00814553  | 0.686881553 |
| pcaac323.h1                   | 0.000433922  | 0.001074272 | 0.68689965  |
| pcaac366.phenylalanine        | 0.012451707  | 0.030827142 | 0.686901164 |
| pcaac300.acetylmethionine     | 0.003704814  | 0.009177578 | 0.68707666  |
| smohc241.c4                   | 0.00462506   | 0.011458189 | 0.687101895 |
| pcaac405.serotonin            | -0.029166507 | 0.072273927 | 0.687169126 |
| pcaac240.pcaec341             | -0.01244986  | 0.030854573 | 0.687208561 |
| c12.pcaac425                  | -0.017891396 | 0.044341021 | 0.687212924 |
| h1.methioninesulfoxide        | 0.014580142  | 0.03613466  | 0.687213428 |
| pcaec444.lysopcac182          | 0.015217253  | 0.037715583 | 0.687228668 |

|                                 |              |             |             |
|---------------------------------|--------------|-------------|-------------|
| pcaac380.pcaec446               | -0.039696956 | 0.098389337 | 0.687232938 |
| c181.pcaec420                   | 0.00569915   | 0.01412545  | 0.687233879 |
| pcaac425.pcaac322               | -0.025238511 | 0.062556637 | 0.687245783 |
| asymmetricdimethylarginine.c3   | -0.016139153 | 0.04000502  | 0.687262208 |
| pcaec342.c8                     | -0.014785934 | 0.036655634 | 0.687301878 |
| c10.pcaac426                    | 0.014761029  | 0.036596995 | 0.687326978 |
| pcaec425.tryptophan             | -0.001261906 | 0.003128767 | 0.687338953 |
| pcaec386.pcaac300               | -0.018299951 | 0.045372923 | 0.68733926  |
| c181.smc202                     | -0.015525316 | 0.038496925 | 0.687365687 |
| pcaac401.pcaec446               | 0.026653092  | 0.066094261 | 0.687386503 |
| pcaec386.glutamicacid           | 0.014094506  | 0.034953079 | 0.687399754 |
| pcaec401.arginine               | -0.018898098 | 0.046874018 | 0.687453225 |
| lysopcac180.threonine           | 0.00974271   | 0.024165916 | 0.687459634 |
| c51.alphaaminoadipicacid        | -0.004250602 | 0.010544901 | 0.687506344 |
| pcaec382.putrescine             | 0.022840817  | 0.056685323 | 0.687620039 |
| pcaac422.lysopcac280            | 0.003755578  | 0.009320515 | 0.687622818 |
| creatinine.alphaaminoadipicacid | 0.000732194  | 0.001817254 | 0.687640857 |
| c16.pcaac344                    | 0.003944784  | 0.009795644 | 0.687790796 |
| c142.pcaac322                   | -0.020290463 | 0.050409736 | 0.687935493 |
| citruline.pcaac406              | 0.023556309  | 0.058527349 | 0.687955327 |
| pcaec420.pcaac281               | 0.000523321  | 0.001300273 | 0.687965443 |
| pcaac385.lysopcac182            | -0.004221178 | 0.010488298 | 0.687968784 |
| pcaac402.pcaec421               | 0.002849966  | 0.007082175 | 0.688006531 |
| pcaac383.pcaec421               | 0.000500114  | 0.001243183 | 0.688100964 |
| smc202.pcaac322                 | 0.012689668  | 0.031544996 | 0.688110813 |
| c5.serine                       | 0.011998117  | 0.029830774 | 0.688159226 |
| pcaec443.smc160                 | -0.010819137 | 0.02690068  | 0.688172302 |
| c5.pcaac320                     | -0.038385934 | 0.095465552 | 0.688242948 |
| pcaec424.lysopcac280            | 0.002332883  | 0.005802254 | 0.688262775 |
| lysopcac203.smc260              | 0.01260834   | 0.03135927  | 0.688265683 |
| isoleucine.tyrosine             | -0.02514768  | 0.062554419 | 0.688301061 |
| c3.pcaec405                     | 0.015023732  | 0.037372888 | 0.688313813 |
| pcaac426.pcaac362               | 0.002192636  | 0.005455739 | 0.688387328 |
| pcaac425.c18                    | -0.015054643 | 0.037460558 | 0.688398706 |
| pcaac342.pcaac361               | 0.016548613  | 0.041181776 | 0.688425688 |
| smc261.pcaec322                 | 0.028905459  | 0.07193249  | 0.688426872 |
| arginine.pcaec446               | 0.034706895  | 0.086376516 | 0.688450443 |
| pcaac425.lysopcac281            | 0.0025066    | 0.006238458 | 0.688458768 |
| smohc161.acetylmithoine         | -0.007408159 | 0.018439533 | 0.688490993 |
| pcaec341.pcaec340               | -0.018803141 | 0.046803291 | 0.68849533  |
| c162.c141oh                     | 0.046532143  | 0.115837129 | 0.688528433 |
| phenylalanine.putrescine        | -0.008687857 | 0.021627567 | 0.688528631 |
| pcaac240.pcaec363               | 0.010541392  | 0.0262437   | 0.688550416 |
| pcaec342.pcaac342               | 0.001385424  | 0.003449558 | 0.68858679  |
| pcaec362.isoleucine             | 0.008245011  | 0.020532164 | 0.688629433 |

|                                 |              |             |             |
|---------------------------------|--------------|-------------|-------------|
| smohc221.c182                   | -0.010593289 | 0.026382771 | 0.688660738 |
| pcaec360.pcaac341               | 0.00553048   | 0.013774685 | 0.688680584 |
| pcaec420.lysine                 | -0.025145673 | 0.06263834  | 0.688720076 |
| pcaec363.asparticacid           | 0.011305326  | 0.028174374 | 0.68885188  |
| asparticacid.pcaac320           | 0.014582705  | 0.036342485 | 0.688855523 |
| pcaac421.pcaac360               | -0.014581972 | 0.036341873 | 0.688865366 |
| arginine.alphaaminoadipicacid   | -0.000486111 | 0.001211531 | 0.688870578 |
| c8.smc160                       | -0.020745561 | 0.051715039 | 0.688933633 |
| methioninesulfoxide.pcaac406    | 0.031912597  | 0.079562057 | 0.688969039 |
| c51dc.threonine                 | -0.021050704 | 0.05248234  | 0.688970877 |
| glutamine.arginine              | 0.010470949  | 0.026109051 | 0.689010527 |
| pcaac321.pcaac360               | -0.014296214 | 0.035658222 | 0.689101156 |
| c12.c10                         | 0.014703208  | 0.036682887 | 0.689177608 |
| lysopcac170.pcaac361            | 0.012478185  | 0.031136431 | 0.689222337 |
| pcaac403.pcaec406               | 0.007541681  | 0.018820377 | 0.689251305 |
| pcaac425.pcaec405               | -0.021747449 | 0.054288407 | 0.689345262 |
| smc181.c181                     | 0.003599599  | 0.008989229 | 0.689460174 |
| smohc222.threonine              | 0.014082345  | 0.035168846 | 0.689470164 |
| smc260.pcaac385                 | -0.006388642 | 0.015959186 | 0.689550813 |
| pcaec386.pcaec363               | -0.013169402 | 0.032905726 | 0.689620707 |
| leucine.smc180                  | 0.003794168  | 0.009485698 | 0.689788095 |
| pcaec423.pcaac342               | 0.001590756  | 0.003977224 | 0.68980423  |
| smc241.c16                      | 0.012752862  | 0.031888127 | 0.689834544 |
| c51dc.pcaec384                  | 0.009510571  | 0.023785857 | 0.689896016 |
| lysopcac281.lysopcac181         | 0.009327937  | 0.023331471 | 0.689925995 |
| asparticacid.valine             | 0.012878255  | 0.032213039 | 0.689938282 |
| pcaec361.serotonin              | 0.038182795  | 0.095521907 | 0.689979271 |
| methioninesulfoxide.lysopcac280 | -0.007480402 | 0.018713896 | 0.689981988 |
| lysopcac280.taurine             | 0.030445059  | 0.076166593 | 0.689987688 |
| pcaec341.pcaac343               | -0.01246196  | 0.031179414 | 0.690010612 |
| c18.creatinine                  | 0.003184931  | 0.00796948  | 0.6900433   |
| smc260.pcaac383                 | -0.001617661 | 0.004048177 | 0.690071675 |
| pcaac360.lysopcac140            | 0.000388684  | 0.000972685 | 0.690073988 |
| c182.tryptophan                 | 0.003067602  | 0.007677005 | 0.690085828 |
| pcaec301.pcaac365               | 0.015287381  | 0.038260143 | 0.690099792 |
| smc161.pcaac342                 | 0.000526127  | 0.001316784 | 0.690106608 |
| pcaec383.pcaec425               | -0.001801987 | 0.004510214 | 0.69012146  |
| c3.c8                           | -0.011022623 | 0.027592713 | 0.690164672 |
| pcaec322.pcaac342               | 0.000924662  | 0.002314791 | 0.690177685 |
| smc240.pcaec405                 | -0.018075227 | 0.04525403  | 0.690207981 |
| pcaac420.pcaac383               | 0.002411304  | 0.006039441 | 0.690323698 |
| c141oh.lysopcac281              | 0.006458591  | 0.016177153 | 0.690336906 |
| c10.lysopcac182                 | 0.03197003   | 0.080080331 | 0.690349432 |
| pcaac383.pcaec406               | 0.002918101  | 0.007309797 | 0.690364456 |
| c8.pcaac366                     | 0.003605781  | 0.009034485 | 0.690431368 |



|                            |              |             |             |
|----------------------------|--------------|-------------|-------------|
| glycine.pcaec444           | 0.031451652  | 0.078839133 | 0.69056259  |
| methioninesulfoxide.lysine | -0.04053071  | 0.101623637 | 0.690638308 |
| smc161.pcaec421            | -0.000633252 | 0.00158812  | 0.690703473 |
| pcaac364.smc180            | 0.00735897   | 0.018457883 | 0.690742472 |
| pcaec360.pcaac383          | 0.00278412   | 0.006983504 | 0.690756413 |
| pcaac426.pcaec402          | -0.011409149 | 0.02862141  | 0.690791691 |
| smc180.acetylmithoine      | -0.006852856 | 0.017193702 | 0.690832199 |
| pcaec385.pcaec386          | -0.00288276  | 0.007233807 | 0.690873125 |
| kynurenine.pcaac366        | -0.008472828 | 0.021262116 | 0.690886359 |
| pcaac362.alanine           | -0.012097931 | 0.030362632 | 0.690920234 |
| pcaec301.alanine           | -0.0053443   | 0.01341768  | 0.691026996 |
| pcaac384.smc202            | 0.015743187  | 0.039531051 | 0.69106687  |
| pcaec444.prolinr           | -0.006758003 | 0.016971538 | 0.691105373 |
| pcaac240.pcaec362          | 0.00299848   | 0.007531052 | 0.691140234 |
| pcaec421.pcaec403          | 0.028570282  | 0.071766403 | 0.691175373 |
| pcaac343.lysine            | -0.024625152 | 0.061871966 | 0.6912484   |
| pcaec445.pcaec340          | -0.0068481   | 0.017208542 | 0.69128817  |
| pcaec362.pcaec365          | -0.006112209 | 0.015361932 | 0.69133778  |
| lysopcac281.lysopcac140    | -0.000437488 | 0.001099554 | 0.691339882 |
| pcaec361.pcaec425          | -0.000960035 | 0.002413078 | 0.691362559 |
| c3.pcaec363                | -0.004578739 | 0.011511071 | 0.691420113 |
| c14.alanine                | 0.008713769  | 0.02190724  | 0.691428036 |
| pcaac365.smohc141          | -0.007206569 | 0.018120742 | 0.691472365 |
| pcaec424.serine            | -0.005645441 | 0.01419607  | 0.691487731 |
| c162.pcaec342              | 0.000515568  | 0.001296497 | 0.691497696 |
| smc181.pcaec342            | 0.000512651  | 0.001289177 | 0.691501659 |
| c10.lysopcac281            | -0.005411726 | 0.013614739 | 0.691624576 |
| pcaec445.pcaac406          | 0.010629391  | 0.026745752 | 0.691673672 |
| pcaec423.pcaec401          | -0.017918973 | 0.045106668 | 0.691795635 |
| pcaac422.smc241            | 0.01823758   | 0.045910012 | 0.691804095 |
| ornithine.pcaec406         | 0.002308718  | 0.005812847 | 0.691856451 |
| c10.c102                   | 0.010634566  | 0.026776519 | 0.691867425 |
| pcaac343.smohc141          | 0.017742035  | 0.044679626 | 0.691915708 |
| c141oh.pcaac281            | -0.000731562 | 0.001842502 | 0.69194987  |
| asparagine.lysopcac281     | -0.003850062 | 0.009702623 | 0.692127737 |
| smc160.smc161              | 0.052677938  | 0.132755878 | 0.692130137 |
| pcaec406.glycine           | 0.016942112  | 0.042703293 | 0.6921764   |
| lysopcac181.pcaec383       | -0.036334357 | 0.091595308 | 0.692218019 |
| smc180.pcaec384            | 0.018663385  | 0.047055126 | 0.692258862 |
| c141.c16                   | 0.01267021   | 0.031945005 | 0.692260617 |
| pcaec381.lysopcac182       | -0.017425943 | 0.043935537 | 0.692260969 |
| pcaec406.c51dc             | -0.04007455  | 0.101046427 | 0.692282908 |
| pcaec422.lysopcac161       | 0.02439846   | 0.061524613 | 0.692305862 |
| pcaec402.asparagine        | 0.003185301  | 0.00803267  | 0.692321269 |
| lysopcac181.pcaec383       | 0.003767006  | 0.00950173  | 0.69238639  |

|                                    |              |             |             |
|------------------------------------|--------------|-------------|-------------|
| pcaec402.pcaac380                  | 0.022356473  | 0.05639191  | 0.692391216 |
| pcaac424.lysopcac203               | 0.005071038  | 0.012792796 | 0.692428237 |
| h1.transhydroxyproline             | -0.007075639 | 0.017855407 | 0.692519177 |
| c102.smc260                        | 0.012401351  | 0.031296145 | 0.69253112  |
| arginine.pcaec364                  | -0.002879897 | 0.00726993  | 0.692619338 |
| pcaac404.c182                      | 0.009809685  | 0.024763611 | 0.692623147 |
| c16.isoleucine                     | -0.009091492 | 0.02295245  | 0.69264664  |
| asymmetricdimethylarginine.pcaac32 | -0.011614796 | 0.029323585 | 0.692654406 |
| pcaac403.c2                        | -0.038167961 | 0.096362878 | 0.692657978 |
| acetylmethionine.c12               | -0.018309337 | 0.046231016 | 0.692691541 |
| pcaec361.pcaac383                  | 0.0016851    | 0.004256652 | 0.692813421 |
| pcaac323.pcaac365                  | -0.016052272 | 0.040551963 | 0.692835514 |
| pcaac401.pcaac360                  | -0.02233111  | 0.056419095 | 0.692862638 |
| lysopcac140.pcaac323               | -0.030991941 | 0.078302027 | 0.692868287 |
| pcaac384.pcaac363                  | 0.001989214  | 0.005027132 | 0.692945136 |
| pcaac385.asymmetricdimethylarginir | -0.006420308 | 0.016229004 | 0.693010295 |
| methioninesulfoxide.pcaac300       | -0.023427266 | 0.059220835 | 0.693021662 |
| asparticacid.methioninesulfoxide   | 0.010366084  | 0.026205411 | 0.693037294 |
| pcaec364.pcaec360                  | 0.001339762  | 0.003387626 | 0.693098694 |
| c5.putrescine                      | -0.01831523  | 0.046319467 | 0.693154558 |
| c102.citruline                     | -0.016429134 | 0.041554459 | 0.693189263 |
| pcaac362.pcaec406                  | 0.001220483  | 0.003087016 | 0.693192133 |
| pcaec404.taurine                   | -0.02552664  | 0.064574962 | 0.69323453  |
| h1.c16                             | 0.011560924  | 0.02925112  | 0.693287755 |
| pcaac424.lysopcac181               | 0.02507734   | 0.063457296 | 0.693321369 |
| smc240.acetylmethionine            | -0.014508696 | 0.036716362 | 0.693342237 |
| c181.pcaec340                      | -0.005047258 | 0.012774275 | 0.693375365 |
| h1.c2                              | 0.010792523  | 0.027319137 | 0.693417755 |
| pcaac361.serotonin                 | 0.027800143  | 0.070380262 | 0.69345783  |
| c142.c16                           | 0.012991996  | 0.03289278  | 0.693471799 |
| pcaac322.lysopcac170               | 0.003771723  | 0.00954933  | 0.693477457 |
| pcaac363.pcaac405                  | 0.02609928   | 0.066082648 | 0.693494709 |
| pcaec382.valine                    | 0.007597213  | 0.019236091 | 0.693497116 |
| c182.smohc141                      | 0.010047464  | 0.025441022 | 0.693507546 |
| pcaac360.lysopcac281               | 0.004849436  | 0.0122793   | 0.693510445 |
| pcaac342.smohc241                  | -0.017398982 | 0.044058399 | 0.693525483 |
| smohc141.c142                      | 0.018893407  | 0.04784835  | 0.693560172 |
| pcaac323.pcaac422                  | -0.00803806  | 0.020356986 | 0.693563904 |
| pcaac384.pcaec446                  | -0.013860677 | 0.03510714  | 0.693596531 |
| smohc161.lysopcac280               | 0.003252447  | 0.008239283 | 0.693642187 |
| c162.pcaac300                      | -0.015128922 | 0.038337901 | 0.693736627 |
| smohc241.pcaac322                  | 0.012464886  | 0.031595374 | 0.693813453 |
| c10.smc241                         | -0.010387711 | 0.026330449 | 0.69381563  |
| kynurenine.pcaac364                | 0.021134661  | 0.053572428 | 0.693820729 |
| pcaec321.asymmetricdimethylarginir | 0.009650038  | 0.024461848 | 0.693830211 |

|                                    |              |             |             |
|------------------------------------|--------------|-------------|-------------|
| pcaac361.pcaac320                  | -0.022318369 | 0.056580171 | 0.693858017 |
| spermidine.c141                    | 0.043608277  | 0.110555482 | 0.693864413 |
| pcaec420.pcaac344                  | 0.018640099  | 0.047257062 | 0.693869204 |
| smc160.lysine                      | 0.016648419  | 0.042212651 | 0.693903394 |
| smc240.pcaac360                    | -0.008585071 | 0.02176862  | 0.693915021 |
| lysopcac170.alphaaminoadipicacid   | -0.000831968 | 0.002109599 | 0.693919104 |
| pcaec405.serine                    | 0.025350472  | 0.064282402 | 0.693927743 |
| smohc241.lysopcac204               | 0.007615989  | 0.019315892 | 0.69398286  |
| histidine.pcaac424                 | 0.010985598  | 0.027873894 | 0.694106842 |
| c162.pcaec363                      | -0.003162163 | 0.008024382 | 0.694142564 |
| pcaac386.c12                       | 0.01595222   | 0.040483618 | 0.694163161 |
| smohc161.pcaec443                  | 0.02551672   | 0.064764858 | 0.694200828 |
| glycine.c4                         | -0.003788533 | 0.009616192 | 0.694212537 |
| c10.pcaec422                       | 0.010417156  | 0.026441225 | 0.694212751 |
| pcaac406.pcaac343                  | 0.012574608  | 0.031918312 | 0.694221475 |
| c142.pcaec365                      | -0.007633679 | 0.019378021 | 0.694241573 |
| c0.pcaac343                        | 0.005658131  | 0.014363381 | 0.694246985 |
| smc181.h1                          | 0.000362134  | 0.000919636 | 0.694356161 |
| glutamine.pcaac362                 | 0.003426744  | 0.008703912 | 0.694413474 |
| pcaac406.smc202                    | 0.007984636  | 0.020282529 | 0.694436249 |
| c142.pcaec420                      | 0.005647361  | 0.014351729 | 0.694564232 |
| c142.c182                          | -0.035331179 | 0.089803281 | 0.694614548 |
| pcaac421.pcaec403                  | -0.009176881 | 0.023327123 | 0.694635909 |
| lysopcac182.pcaec406               | 0.001161007  | 0.002951563 | 0.694670058 |
| pcaac362.c0                        | -0.000425532 | 0.001081826 | 0.694675694 |
| kynurenine.pcaec406                | 0.00391831   | 0.009961925 | 0.694688177 |
| pcaec365.asymmetricdimethylarginir | 0.014997243  | 0.03813214  | 0.694711762 |
| smohc221.pcaec365                  | 0.010246255  | 0.026053283 | 0.694723455 |
| lysopcac182.pcaac342               | -0.001698532 | 0.004320782 | 0.694851154 |
| pcaec322.pcaec425                  | -0.001118476 | 0.002847185 | 0.695051373 |
| c182.c51                           | 0.018962591  | 0.048273464 | 0.695065892 |
| pcaac343.pcaec384                  | -0.010749942 | 0.027366484 | 0.695067299 |
| lysopcac280.c51                    | -0.040518818 | 0.103155586 | 0.695082687 |
| pcaec383.c8                        | 0.01464886   | 0.037294725 | 0.695087753 |
| smc202.pcaac342                    | 0.000468227  | 0.00119211  | 0.695098496 |
| pcaec360.c162                      | -0.031182468 | 0.079406693 | 0.695156413 |
| pcaac341.acetylmethionine          | 0.004335682  | 0.011043496 | 0.695224699 |
| smc260.c51dc                       | -0.03492466  | 0.08895918  | 0.695231011 |
| pcaac281.smc161                    | 0.038256457  | 0.097453905 | 0.695254944 |
| smc160.methionine                  | 0.008813234  | 0.022451637 | 0.695267086 |
| c142.smohc141                      | 0.009895609  | 0.025209229 | 0.695269938 |
| pcaec381.smc181                    | 0.001641627  | 0.004182557 | 0.695303549 |
| glutamine.pcaac240                 | 0.00612633   | 0.015612073 | 0.695365311 |
| pcaec386.pcaac344                  | -0.025200595 | 0.064220406 | 0.695366676 |
| smohc221.smc161                    | 0.040374145  | 0.102908736 | 0.695424377 |

|                               |              |             |             |
|-------------------------------|--------------|-------------|-------------|
| smc260.pcaac321               | -0.007127011 | 0.018167825 | 0.695455428 |
| c141.pcaac405                 | -0.020663595 | 0.05268499  | 0.695512336 |
| pcaac281.smohc241             | -0.023605377 | 0.060204245 | 0.695602287 |
| isoleucine.smc241             | 0.006011616  | 0.015336738 | 0.695685843 |
| c141oh.pcaec402               | -0.01131444  | 0.028867645 | 0.695710155 |
| smohc241.prolinr              | -0.005860962 | 0.014956514 | 0.695765519 |
| pcaac424.lysopcac182          | -0.034704041 | 0.088598696 | 0.695889062 |
| phenylalanine.smc180          | -0.004890835 | 0.012487188 | 0.695911896 |
| smc261.pcaec425               | 0.001905271  | 0.004866608 | 0.696036813 |
| pcaec403.pcaac425             | 0.040371837  | 0.103126891 | 0.69605268  |
| lysopcac170.pcaec321          | 0.013293335  | 0.033959422 | 0.696074576 |
| pcaac422.smc240               | 0.012873242  | 0.032891376 | 0.696119598 |
| pcaac380.pcaec384             | 0.011216344  | 0.028658379 | 0.696123719 |
| pcaac364.pcaac342             | -0.00185644  | 0.004744857 | 0.69621798  |
| smc241.pcaac323               | -0.023309095 | 0.059591251 | 0.696294296 |
| alphaaminoadipicacid.pcaec402 | -0.010392608 | 0.026579618 | 0.696405261 |
| pcaec420.pcaac380             | 0.018243998  | 0.046666105 | 0.69644333  |
| pcaac426.pcaac366             | 0.003590375  | 0.00918393  | 0.696448129 |
| lysine.threonine              | 0.006126751  | 0.015672572 | 0.696462274 |
| pcaec403.lysopcac280          | 0.002590603  | 0.006627825 | 0.696502201 |
| creatinine.glutamine          | -0.00368648  | 0.009433949 | 0.696576117 |
| c2.pcaec422                   | -0.015191927 | 0.038887433 | 0.696652297 |
| ornithine.lysopcac180         | 0.014260639  | 0.036503937 | 0.696655156 |
| pcaac361.lysopcac182          | -0.004127668 | 0.01056793  | 0.696711179 |
| creatinine.pcaac406           | 0.008861244  | 0.022691389 | 0.696765046 |
| pcaec405.methionine           | -0.014772411 | 0.037830324 | 0.696779834 |
| pcaac420.pcaec420             | 0.010895096  | 0.027901378 | 0.696783752 |
| putrescine.pcaec403           | -0.00663973  | 0.017004853 | 0.696802211 |
| lysopcac281.lysine            | -0.021848631 | 0.055956929 | 0.696806997 |
| pcaec403.pcaac240             | 0.007125941  | 0.018252408 | 0.696839024 |
| pcaec383.pcaac342             | 0.006629681  | 0.016982012 | 0.69685132  |
| smohc241.kynurenine           | -0.002001323 | 0.005126792 | 0.696872584 |
| asparticacid.pcaac424         | 0.006181337  | 0.015835652 | 0.696889129 |
| pcaec425.pcaac365             | 0.01578632   | 0.040456788 | 0.696993197 |
| lysopcac203.c12               | -0.025951388 | 0.066509669 | 0.697002268 |
| pcaec341.pcaac363             | 0.003298803  | 0.008454833 | 0.697018507 |
| pcaac425.pcaac240             | -0.005512758 | 0.014131192 | 0.697059028 |
| pcaac404.pcaac381             | 0.011584799  | 0.029700142 | 0.69709889  |
| smc260.pcaac342               | 0.000640143  | 0.001641545 | 0.697169036 |
| isoleucine.smc181             | 0.008531296  | 0.021877875 | 0.697178462 |
| pcaec445.isoleucine           | -0.006211312 | 0.015930003 | 0.697206527 |
| pcaec402.methioninesulfoxide  | 0.004091268  | 0.010492799 | 0.697207143 |
| c2.pcaac363                   | 0.002271839  | 0.005827799 | 0.697269135 |
| serine.glycine                | -0.00766084  | 0.019659634 | 0.69738305  |
| lysopcac203.pcaac360          | -0.010031587 | 0.025744786 | 0.69739669  |

|                                    |              |             |             |
|------------------------------------|--------------|-------------|-------------|
| pcaec422.pcaec361                  | -0.007048198 | 0.018090437 | 0.697430649 |
| c141oh.pcaec365                    | 0.008293455  | 0.021293257 | 0.697520441 |
| glutamicacid.pcaec320              | -0.036371143 | 0.093384771 | 0.697528703 |
| pcaec383.smc260                    | -0.012017587 | 0.030856311 | 0.697533728 |
| prolinr.ornithine                  | 0.012262261  | 0.031488139 | 0.697566644 |
| c2.pcaec382                        | 0.004032343  | 0.010357775 | 0.697654304 |
| pcaac421.lysopcac181               | -0.024476292 | 0.06287344  | 0.697662665 |
| c141.pcaac342                      | 0.000575739  | 0.001478955 | 0.697668035 |
| c142.pcaac342                      | 0.000709927  | 0.00182366  | 0.697668239 |
| pcaec383.pcaac364                  | 0.016362161  | 0.042044678 | 0.697761054 |
| lysopcac182.smohc141               | 0.003214056  | 0.008260749 | 0.69782426  |
| pcaac342.lysine                    | -0.017822785 | 0.045808508 | 0.697827317 |
| lysopcac140.c51                    | -0.023523856 | 0.060462849 | 0.697833609 |
| histidine.pcaac420                 | 0.016802645  | 0.043187681 | 0.697835023 |
| pcaac384.c182                      | 0.00867869   | 0.022310155 | 0.697878784 |
| c18.pcaac320                       | -0.012752264 | 0.03278371  | 0.697893572 |
| c3.pcaec445                        | -0.032146435 | 0.082643146 | 0.697895705 |
| pcaec340.pcaac360                  | -0.014313837 | 0.036801934 | 0.697922517 |
| pcaec384.phenylalanine             | -0.012525904 | 0.032218167 | 0.698039603 |
| pcaec382.threonine                 | -0.010178749 | 0.026181027 | 0.69803995  |
| alphaaminoadipicacid.pcaac403      | 0.003171223  | 0.00815832  | 0.698093863 |
| phenylalanine.asymmetricdimethylar | -0.013790013 | 0.035478791 | 0.698113832 |
| methionine.pcaac361                | -0.012324245 | 0.031718335 | 0.698210226 |
| serotonin.pcaec425                 | -0.001398725 | 0.003600213 | 0.698240563 |
| serotonin.phenylalanine            | -0.02103554  | 0.054152602 | 0.698286561 |
| smohc241.pcaec365                  | 0.009997731  | 0.025737922 | 0.698290787 |
| c10.smohc161                       | -0.003561199 | 0.009167925 | 0.698292574 |
| c51dc.lysopcac180                  | 0.023776358  | 0.061216054 | 0.69832244  |
| ornithine.smohc221                 | 0.015607336  | 0.040201791 | 0.698452224 |
| pcaec300.pcaac323                  | -0.017141521 | 0.044167557 | 0.698542872 |
| pcaec420.h1                        | 0.000779993  | 0.002010155 | 0.698599042 |
| pcaec401.c142                      | 0.011377935  | 0.029341893 | 0.698787326 |
| pcaac361.glycine                   | -0.006084126 | 0.015692778 | 0.698838056 |
| isoleucine.lysopcac281             | -0.003328776 | 0.008586733 | 0.698865565 |
| phenylalanine.pcaec444             | 0.039287075  | 0.101363867 | 0.698924957 |
| pcaec422.methionine                | -0.019519608 | 0.050363893 | 0.698934661 |
| prolinr.asymmetricdimethylarginine | -0.0046977   | 0.012122997 | 0.698985066 |
| pcaec402.smc202                    | 0.034026822  | 0.087835441 | 0.699066565 |
| c141oh.lysine                      | 0.018882883  | 0.048751234 | 0.699111958 |
| lysopcac170.c2                     | -0.024372656 | 0.062936421 | 0.69916588  |
| c141oh.pcaec404                    | 0.008943228  | 0.023095805 | 0.699191976 |
| c141.lysopcac140                   | -0.000606063 | 0.001565568 | 0.699267736 |
| pcaec422.pcaec363                  | 0.010816705  | 0.027942842 | 0.699282027 |
| pcaac402.lysopcac281               | 0.005732775  | 0.014813885 | 0.69936659  |
| pcaac240.pcaec403                  | 0.027572937  | 0.071253321 | 0.699378445 |

|                                    |              |             |             |
|------------------------------------|--------------|-------------|-------------|
| c0.smc160                          | 0.022151335  | 0.057252909 | 0.699428184 |
| putrescine.c4                      | -0.002736599 | 0.007073866 | 0.699459788 |
| glutamicacid.pcaec402              | -0.028466065 | 0.073589555 | 0.699488108 |
| smc202.pcaec403                    | -0.004375153 | 0.011310666 | 0.699492181 |
| pcaec424.c102                      | -0.007255706 | 0.018760114 | 0.69953222  |
| pcaac426.putrescine                | 0.009048166  | 0.023396214 | 0.699551463 |
| isoleucine.pcaac342                | -0.001442771 | 0.003731071 | 0.699585106 |
| pcaac365.asparticacid              | -0.017578581 | 0.04546049  | 0.699594388 |
| smc261.h1                          | 0.000809693  | 0.002094477 | 0.699663295 |
| h1.c182                            | 0.010826199  | 0.028008658 | 0.699703537 |
| pcaec402.lysopcac203               | 0.007516707  | 0.019447504 | 0.699716672 |
| pcaec406.pcaac342                  | 0.001974343  | 0.005108121 | 0.699718153 |
| smc260.pcaac365                    | 0.020690047  | 0.053531294 | 0.699723244 |
| glycine.smc181                     | -0.020223112 | 0.05232771  | 0.69974789  |
| pcaac420.asymmetricdimethylarginir | 0.006899416  | 0.017855472 | 0.699797366 |
| pcaac300.pcaac420                  | 0.030293617  | 0.078410815 | 0.699840631 |
| pcaac342.pcaec444                  | -0.030771972 | 0.079662169 | 0.699887923 |
| pcaec321.smc202                    | 0.015480563  | 0.0400839   | 0.699944696 |
| pcaac344.c51                       | -0.022971906 | 0.059481606 | 0.699946312 |
| pcaec342.pcaac425                  | 0.030509386  | 0.079013976 | 0.700002015 |
| alphaaminoadipicacid.c51dc         | -0.042612191 | 0.110366161 | 0.700022781 |
| smohc161.pcaec420                  | 0.006479901  | 0.016783383 | 0.700028746 |
| smc241.c18                         | -0.008802656 | 0.022800874 | 0.700046211 |
| pcaec404.c12                       | 0.02409461   | 0.062414544 | 0.700064711 |
| pcaac341.asymmetricdimethylarginir | 0.010834241  | 0.028065711 | 0.700072368 |
| pcaac363.pcaec425                  | -0.001732091 | 0.004487116 | 0.700084801 |
| pcaac424.pcaec401                  | 0.026551843  | 0.068798366 | 0.700141905 |
| pcaac323.pcaec406                  | 0.002162986  | 0.005605266 | 0.700180737 |
| pcaec403.pcaac360                  | -0.016835737 | 0.043629505 | 0.700184382 |
| c141oh.pcaac344                    | -0.018764289 | 0.048633092 | 0.700218269 |
| pcaac365.c14                       | -0.025802174 | 0.066875192 | 0.700224169 |
| pcaec406.acetylmithoine            | -0.009239501 | 0.023947497 | 0.700226052 |
| smc260.pcaec402                    | 0.026564219  | 0.068856817 | 0.700251172 |
| pcaac426.pcaac383                  | 0.002643677  | 0.006852977 | 0.700264915 |
| pcaec402.pcaac342                  | 0.001862332  | 0.004827698 | 0.70027296  |
| smc202.c162                        | -0.039900589 | 0.103456225 | 0.700334808 |
| pcaec421.pcaec342                  | 0.033534924  | 0.086954202 | 0.700345263 |
| pcaec445.c101                      | -0.004193359 | 0.010873849 | 0.700363637 |
| smohc222.c16                       | 0.012528191  | 0.032489586 | 0.70038631  |
| lysopcac280.alphaaminoadipicacid   | -0.000601692 | 0.001560604 | 0.700427359 |
| lysopcac170.pcaec343               | 0.024902684  | 0.064602622 | 0.700483522 |
| alanine.pcaec341                   | -0.014625521 | 0.037942984 | 0.70049412  |
| pcaac240.smc181                    | 0.002074981  | 0.0053837   | 0.700524645 |
| pcaec424.alanine                   | -0.00387272  | 0.010048333 | 0.700531997 |
| pcaac420.pcaec383                  | 0.026488753  | 0.068734259 | 0.700554201 |

|                           |              |             |             |
|---------------------------|--------------|-------------|-------------|
| c51dc.pcaec425            | 0.001663847  | 0.004318455 | 0.700621819 |
| pcaac403.ornithine        | 0.015845846  | 0.041135081 | 0.700675626 |
| smohc141.pcaec420         | 0.005984015  | 0.015535603 | 0.700700862 |
| ornithine.pcaec365        | 0.01009574   | 0.026219531 | 0.700800046 |
| pcaac365.pcaec341         | -0.034426319 | 0.089430191 | 0.70087004  |
| pcaac385.acetylmethionine | 0.01509915   | 0.039226255 | 0.700890204 |
| smohc141.pcaac342         | 0.000447068  | 0.001161677 | 0.700947251 |
| pcaac361.pcaec406         | 0.001538114  | 0.003997223 | 0.700985429 |
| alanine.ornithine         | 0.016770711  | 0.043596476 | 0.701070698 |
| arginine.pcaac320         | 0.018956483  | 0.049307094 | 0.7012355   |
| lysine.pcaac342           | -0.001339325 | 0.003485806 | 0.701409381 |
| c182.serine               | 0.008183647  | 0.021301807 | 0.701443484 |
| pcaac344.pcaec343         | -0.032299683 | 0.084083149 | 0.701470412 |
| lysopcac140.c8            | 0.011952406  | 0.031119427 | 0.701513275 |
| pcaac366.pcaec341         | -0.009150611 | 0.023824667 | 0.70151359  |
| pcaec445.lysine           | 0.031186354  | 0.081240478 | 0.701664709 |
| c12.pcaac281              | -0.00025301  | 0.000659209 | 0.70171588  |
| pcaec301.acetylmethionine | 0.003687892  | 0.009612296 | 0.701822202 |
| lysopcac160.pcaec340      | 0.021726548  | 0.056635849 | 0.701856054 |
| pcaac342.pcaec382         | -0.003886307 | 0.010132007 | 0.701893728 |
| pcaac363.pcaec421         | 0.001634983  | 0.004262632 | 0.701897781 |
| smc241.c182               | -0.007022134 | 0.018308572 | 0.701911359 |
| smc160.pcaec444           | 0.032918609  | 0.085830371 | 0.701920602 |
| pcaec365.pcaac363         | 0.002784228  | 0.007261531 | 0.702001473 |
| c181.pcaec386             | -0.001814113 | 0.004731837 | 0.702028982 |
| pcaec444.c16              | 0.011018529  | 0.028748856 | 0.702114801 |
| histidine.pcaac362        | -0.002728096 | 0.007118734 | 0.702144944 |
| smc240.pcaac383           | -0.00100297  | 0.002617224 | 0.702151512 |
| smohc161.pcaac422         | -0.009158667 | 0.023900838 | 0.702169575 |
| lysopcac170.smohc141      | -0.007572713 | 0.019762292 | 0.702172835 |
| pcaac322.c8               | 0.011973821  | 0.031250246 | 0.702195576 |
| c14.pcaac321              | 0.008335168  | 0.021755391 | 0.702216363 |
| c141.methioninesulfoxide  | 0.004764826  | 0.012436556 | 0.702216736 |
| ornithine.pcaac342        | -0.001457729 | 0.003805424 | 0.702264542 |
| asparagine.arginine       | 0.007401675  | 0.019322333 | 0.702266625 |
| pcaac386.pcaec363         | 0.008540849  | 0.022303656 | 0.702361491 |
| pcaac323.pcaec301         | -0.020407082 | 0.053297854 | 0.702396594 |
| pcaec421.c162             | 0.027387444  | 0.071556606 | 0.702507078 |
| lysopcac180.c141oh        | 0.026269591  | 0.068637692 | 0.702514329 |
| smohc222.pcaec380         | 0.01630984   | 0.042616903 | 0.702529217 |
| pcaac341.alanine          | -0.007583471 | 0.019815482 | 0.702532107 |
| smc161.pcaac366           | 0.011038829  | 0.028846028 | 0.702549298 |
| smohc161.pcaac342         | 0.00046984   | 0.001228057 | 0.702618333 |
| pcaac360.taurine          | 0.01613395   | 0.042185792 | 0.702720387 |
| pcaec321.c16              | 0.01154845   | 0.030197645 | 0.702735942 |

|                                |              |             |             |
|--------------------------------|--------------|-------------|-------------|
| smc241.pcaec446                | -0.007811992 | 0.020431716 | 0.702796954 |
| pcaec444.alphaaminoadipicacid  | -0.000606341 | 0.00158596  | 0.702818091 |
| pcaac363.lysopcac182           | -0.005653352 | 0.01478752  | 0.702827125 |
| pcaac364.pcaec341              | 0.025762052  | 0.067387987 | 0.702835389 |
| pcaac240.taurine               | 0.014225459  | 0.037212887 | 0.702851698 |
| creatinine.pcaec402            | -0.01292944  | 0.033829146 | 0.702906568 |
| pcaac380.pcaac383              | 0.002888713  | 0.007559569 | 0.702959531 |
| smohc222.pcaac342              | 0.000430244  | 0.001126779 | 0.703175165 |
| smc180.pcaac342                | 0.000530676  | 0.00138982  | 0.703178546 |
| pcaec364.pcaac381              | -0.012601378 | 0.033008997 | 0.703233931 |
| c141oh.isoleucine              | -0.002848412 | 0.007461365 | 0.703234679 |
| smc260.lysine                  | 0.02025663   | 0.053065967 | 0.703256443 |
| smc161.pcaac323                | 0.027334679  | 0.071621372 | 0.703308331 |
| alanine.pcaac384               | 0.015159279  | 0.039721237 | 0.703318444 |
| serotonin.h1                   | -0.001519301 | 0.003981736 | 0.703373242 |
| smc202.h1                      | 0.000313796  | 0.000822504 | 0.703413599 |
| pcaec386.pcaec340              | -0.021687277 | 0.056862354 | 0.703497643 |
| pcaec342.pcaec402              | -0.016646708 | 0.043658073 | 0.703573304 |
| pcaec363.smohc161              | -0.004234369 | 0.011106133 | 0.703597933 |
| pcaac341.pcaec365              | -0.009018323 | 0.023661764 | 0.703693585 |
| lysine.pcaac343                | 0.006400833  | 0.016795848 | 0.703722247 |
| pcaec342.pcaec383              | -0.020625346 | 0.054125015 | 0.703742603 |
| pcaac405.creatinine            | 0.013131328  | 0.034459561 | 0.703745402 |
| c101.pcaac342                  | 0.000536884  | 0.001409018 | 0.703768153 |
| c8.pcaac405                    | -0.022429825 | 0.058869298 | 0.7037856   |
| pcaec300.pcaec360              | 0.002144517  | 0.00562877  | 0.703799203 |
| prolinr.smohc141               | -0.005862413 | 0.015388701 | 0.703826258 |
| pcaac403.pcaac425              | -0.05167769  | 0.135676999 | 0.703876618 |
| c16.pcaac341                   | -0.002136238 | 0.005609015 | 0.703898577 |
| pcaec382.lysine                | 0.035133171  | 0.092248599 | 0.703902132 |
| smohc161.smohc222              | -0.002365695 | 0.006211627 | 0.703904802 |
| leucine.threonine              | 0.008999856  | 0.023631022 | 0.703905066 |
| putrescine.pcaec342            | 0.020658282  | 0.054259791 | 0.703993974 |
| pcaec425.pcaec423              | 0.005118131  | 0.013443139 | 0.70399745  |
| smc241.pcaac426                | -0.016875168 | 0.044327559 | 0.704021101 |
| smc160.pcaac342                | 0.000503323  | 0.001322497 | 0.70410054  |
| pcaac401.pcaec361              | 0.006763613  | 0.017773709 | 0.704133754 |
| pcaac403.glycine               | -0.006082823 | 0.015986164 | 0.704159544 |
| glutamine.putrescine           | 0.011735185  | 0.030846557 | 0.704209948 |
| smohc161.threonine             | -0.01102714  | 0.028993963 | 0.704292922 |
| methionine.methioninesulfoxide | 0.004902155  | 0.012892377 | 0.704358577 |
| asparagine.acetylnithoine      | 0.008188051  | 0.021539935 | 0.70443502  |
| pcaec360.pcaac363              | -0.005134904 | 0.013509281 | 0.704458366 |
| lysopcac204.creatinine         | -0.004628844 | 0.012178763 | 0.704478289 |
| pcaac300.pcaec444              | 0.027520535  | 0.07241492  | 0.704504567 |



|                                    |              |             |             |
|------------------------------------|--------------|-------------|-------------|
| pcaac384.lysopcac281               | 0.004197494  | 0.011048078 | 0.704585889 |
| pcaac385.c14                       | -0.009344457 | 0.024598571 | 0.704624187 |
| pcaec360.pcaec425                  | -0.000842031 | 0.002216638 | 0.70463143  |
| pcaec443.asparagine                | -0.008105224 | 0.021340645 | 0.704680372 |
| lysopcac140.spermidine             | -0.023408975 | 0.061642505 | 0.704716224 |
| c141oh.pcaec405                    | -0.016341461 | 0.043032808 | 0.704723285 |
| lysine.phenylalanine               | 0.010747411  | 0.02830179  | 0.704724111 |
| c12.pcaec425                       | -0.002218778 | 0.005843097 | 0.704736593 |
| pcaec364.glycine                   | 0.01267315   | 0.033376766 | 0.704756243 |
| pcaac361.pcaec385                  | -0.020906738 | 0.055062674 | 0.704763585 |
| c4.pcaec383                        | 0.020202618  | 0.053209005 | 0.704767774 |
| c5.pcaec421                        | 0.000562803  | 0.001482331 | 0.704775332 |
| pcaac344.c16                       | 0.00825084   | 0.021735794 | 0.704832422 |
| pcaec322.pcaec342                  | -0.040178138 | 0.105853154 | 0.704856161 |
| glutamine.c162                     | -0.024081605 | 0.063453098 | 0.704890724 |
| pcaac321.pcaec342                  | 0.032528818  | 0.08572855  | 0.704948851 |
| serotonin.tryptophan               | -0.001381488 | 0.003641448 | 0.70499396  |
| pcaac386.pcaec360                  | 0.001619166  | 0.004268344 | 0.705020614 |
| acetylmethionine.pcaac281          | -0.001195099 | 0.003150867 | 0.705058191 |
| pcaec422.pcaec446                  | -0.011242631 | 0.02965506  | 0.705190588 |
| c141oh.pcaec424                    | 0.009496724  | 0.025050001 | 0.705192581 |
| smohc241.lysopcac140               | -0.000268466 | 0.000708343 | 0.705269867 |
| pcaac386.pcaac281                  | -0.000505407 | 0.001333686 | 0.705307563 |
| creatinine.pcaec403                | 0.008778466  | 0.023166393 | 0.705325677 |
| phenylalanine.glutamine            | 0.00669776   | 0.017677682 | 0.70536184  |
| lysopcac140.c141oh                 | 0.036697587  | 0.096890323 | 0.705456948 |
| lysopcac170.c102                   | 0.010908161  | 0.028801316 | 0.705468519 |
| pcaac421.pcaac363                  | 0.004010202  | 0.010590307 | 0.705521196 |
| lysopcac161.pcaac420               | 0.022321456  | 0.058958791 | 0.705575277 |
| smc202.pcaac422                    | -0.016578011 | 0.043791539 | 0.705595779 |
| pcaec380.valine                    | 0.016752448  | 0.044262818 | 0.705662295 |
| smc161.pcaac362                    | 0.006812267  | 0.018006804 | 0.705781253 |
| pcaac322.smc260                    | 0.007856349  | 0.020767566 | 0.70579404  |
| pcaec361.pcaec364                  | 0.002141396  | 0.005660665 | 0.705797642 |
| pcaec423.asymmetricdimethylarginir | 0.005694075  | 0.015061289 | 0.705970946 |
| smc241.lysopcac160                 | 0.01333591   | 0.035292476 | 0.706113192 |
| pcaec361.lysine                    | 0.026511382  | 0.070165368 | 0.706133166 |
| pcaac363.c3                        | -0.008938818 | 0.023659764 | 0.706158891 |
| lysopcac160.c182                   | 0.010710901  | 0.028358724 | 0.706242929 |
| pcaac341.tyrosine                  | -0.022987522 | 0.060875458 | 0.706300558 |
| pcaac426.c18                       | -0.015124445 | 0.040074017 | 0.706450911 |
| pcaac426.pcaac361                  | -0.016159473 | 0.042827222 | 0.706521319 |
| pcaec300.pcaac383                  | 0.001165983  | 0.003090223 | 0.706524508 |
| pcaec363.pcaec362                  | 0.006716748  | 0.017802272 | 0.706536553 |
| pcaec342.c162                      | -0.029051795 | 0.07700279  | 0.706547575 |

|                                  |              |             |             |
|----------------------------------|--------------|-------------|-------------|
| smohc222.pcaec446                | -0.007202661 | 0.019092379 | 0.706569206 |
| c4.pcaac365                      | -0.023024081 | 0.061041323 | 0.706617212 |
| pcaec301.pcaac342                | -0.001224223 | 0.003246453 | 0.706686125 |
| pcaac385.smohc141                | -0.004632178 | 0.012284941 | 0.706711339 |
| acetylmethionine.lysine          | -0.03048827  | 0.08086073  | 0.706722308 |
| smc260.pcaec301                  | 0.016405224  | 0.043512761 | 0.706741361 |
| lysopcac161.alphaaminoadipicacid | -0.001834664 | 0.004866427 | 0.706753783 |
| smc261.lysopcac181               | 0.018784363  | 0.049835289 | 0.706809614 |
| pcaac361.pcaec380                | -0.018937125 | 0.05024994  | 0.706861721 |
| pcaac363.pcaec406                | 0.001385626  | 0.003677497 | 0.706916248 |
| c14.pcaac361                     | 0.013836055  | 0.036733731 | 0.707010477 |
| pcaac342.c8                      | 0.014704719  | 0.039059495 | 0.707150087 |
| pcaec384.lysopcac170             | 0.003148825  | 0.00836413  | 0.707151612 |
| pcaec382.c0                      | 0.000399575  | 0.00106139  | 0.707154239 |
| pcaac365.threonine               | 0.01193237   | 0.031697492 | 0.707168291 |
| serotonin.pcaac342               | 0.001113284  | 0.002957362 | 0.707168603 |
| c10.methionine                   | 0.012075048  | 0.032079631 | 0.707195487 |
| asparticacid.c141                | -0.01509704  | 0.040118831 | 0.707270017 |
| pcaac402.pcaec365                | -0.006773642 | 0.018000373 | 0.707271827 |
| pcaec443.c5                      | -0.007913994 | 0.021033185 | 0.707303962 |
| pcaec422.asparagine              | 0.003634028  | 0.009658913 | 0.707323697 |
| pcaac403.smc181                  | 0.001471741  | 0.003911813 | 0.707328065 |
| pcaac380.pcaec425                | -0.000848892 | 0.002256623 | 0.707366453 |
| smohc221.pcaac342                | 0.001206152  | 0.00320651  | 0.707381873 |
| pcaec361.pcaec446                | -0.011947075 | 0.031765692 | 0.707424377 |
| c5.pcaec343                      | -0.037452386 | 0.099605513 | 0.707493194 |
| glycine.pcaec402                 | -0.016278894 | 0.043302738 | 0.707548793 |
| pcaec405.glutamicacid            | 0.021509563  | 0.05723441  | 0.707635547 |
| alanine.pcaac406                 | -0.014258748 | 0.037942786 | 0.707649804 |
| pcaec385.phenylalanine           | 0.008766995  | 0.023340392 | 0.707784288 |
| lysopcac280.pcaec386             | -0.002408158 | 0.006412535 | 0.707840277 |
| pcaac322.pcaec445                | -0.015435032 | 0.041120187 | 0.707970395 |
| smc160.pcaec406                  | 0.001725464  | 0.004597783 | 0.708031262 |
| pcaec381.valine                  | 0.009227128  | 0.024587678 | 0.708036699 |
| pcaec385.glutamicacid            | 0.011376697  | 0.030338891 | 0.708249819 |
| arginine.pcaec421                | -0.003300631 | 0.008804622 | 0.708333245 |
| lysopcac160.pcaac366             | -0.003925425 | 0.010475366 | 0.708441366 |
| glutamicacid.glycine             | -0.008844935 | 0.023605779 | 0.708467686 |
| pcaec364.smohc141                | 0.016309787  | 0.043537378 | 0.708525512 |
| lysopcac140.pcaec301             | -0.016633462 | 0.044406679 | 0.708558569 |
| c102.acetylmethionine            | 0.002931795  | 0.00782762  | 0.708578084 |
| smc261.pcaac321                  | 0.008526961  | 0.022769903 | 0.708623383 |
| pcaec404.ornithine               | 0.012015971  | 0.032087766 | 0.708632146 |
| pcaac320.smc241                  | -0.003601961 | 0.00961919  | 0.708644212 |
| pcaec384.pcaec423                | 0.005195292  | 0.013874677 | 0.708652821 |

|                                    |              |             |             |
|------------------------------------|--------------|-------------|-------------|
| pcaac360.smc260                    | -0.011426387 | 0.030518489 | 0.708679177 |
| c182.pcaec401                      | -0.015214013 | 0.040636494 | 0.708690905 |
| c8.pcaac342                        | 0.000202321  | 0.000540398 | 0.708691373 |
| phenylalanine.c18                  | 0.013334924  | 0.035622778 | 0.70873237  |
| pcaac386.c4                        | 0.005692309  | 0.015207695 | 0.708756498 |
| pcaac323.pcaec363                  | -0.007863542 | 0.021009674 | 0.708773204 |
| acetylmethionine.asparticacid      | 0.004267699  | 0.011406861 | 0.708882741 |
| pcaac404.lysopcac281               | 0.004034781  | 0.010784931 | 0.708898736 |
| pcaec341.pcaec406                  | 0.001525593  | 0.004077901 | 0.70889912  |
| asparticacid.lysopcac280           | -0.002569134 | 0.006867815 | 0.708920753 |
| serine.c5                          | -0.003860662 | 0.010320547 | 0.708926633 |
| lysine.pcaac321                    | 0.01563553   | 0.041808215 | 0.708995679 |
| lysopcac204.pcaac342               | -0.001310113 | 0.003504021 | 0.70906537  |
| pcaec381.smc241                    | 0.010405332  | 0.027833372 | 0.709098491 |
| c4.pcaac342                        | 0.000630715  | 0.001687292 | 0.709128826 |
| c102.pcaac360                      | 0.008739029  | 0.023379163 | 0.709134208 |
| lysopcac161.smc160                 | -0.013742935 | 0.036766405 | 0.709137966 |
| pcaac366.pcaec384                  | 0.006784372  | 0.01815021  | 0.70913818  |
| lysopcac280.smc240                 | -0.016647091 | 0.044541882 | 0.709175368 |
| pcaec420.asymmetricdimethylarginin | -0.007193139 | 0.019250017 | 0.709228037 |
| pcaec384.pcaec362                  | 0.017038063  | 0.045600024 | 0.709248598 |
| c10.pcaac342                       | 0.000186473  | 0.000499073 | 0.709251045 |
| histidine.pcaac300                 | -0.016600705 | 0.044432527 | 0.709267528 |
| serotonin.spermidine               | 0.020571052  | 0.055079012 | 0.709366606 |
| pcaec363.pcaac342                  | 0.002113384  | 0.005658905 | 0.709382099 |
| pcaec301.smc180                    | 0.008771299  | 0.023494401 | 0.709475666 |
| c16.pcaec420                       | 0.010334141  | 0.027680677 | 0.709476839 |
| c10.pcaac361                       | 0.012447498  | 0.033342262 | 0.709483659 |
| pcaec403.c18                       | 0.018079672  | 0.048445527 | 0.709579468 |
| pcaec425.lysopcac140               | 0.000683185  | 0.001830913 | 0.709621878 |
| lysopcac280.valine                 | 0.010016705  | 0.026846061 | 0.709638522 |
| prolinr.kynurenine                 | 0.003229053  | 0.008654329 | 0.709640118 |
| c141.pcaec382                      | 0.004453847  | 0.011937163 | 0.709644984 |
| pcaec386.lysopcac204               | -0.01014263  | 0.02718495  | 0.709652703 |
| lysopcac180.phenylalanine          | 0.017854327  | 0.047857539 | 0.709671163 |
| smohc141.c102                      | 0.011370487  | 0.030489862 | 0.709779265 |
| glutamine.lysopcac161              | -0.014460181 | 0.038789147 | 0.709881352 |
| pcaec402.pcaec281                  | -0.00105952  | 0.002842212 | 0.709888147 |
| c101.pcaec425                      | -0.002725502 | 0.007313058 | 0.709955276 |
| pcaac365.pcaec380                  | -0.018189086 | 0.048814541 | 0.710009978 |
| pcaac380.pcaec420                  | 0.010856149  | 0.029137961 | 0.710038671 |
| lysopcac170.pcaec322               | 0.017601704  | 0.047253575 | 0.710100203 |
| prolinr.histidine                  | -0.018007496 | 0.048345996 | 0.710117559 |
| smc240.taurine                     | 0.01226769   | 0.032939816 | 0.710150148 |
| lysopcac181.smc240                 | 0.019780214  | 0.05311508  | 0.710168301 |

|                                 |              |             |             |
|---------------------------------|--------------|-------------|-------------|
| pcaec383.lysine                 | 0.026024435  | 0.069887478 | 0.710188164 |
| pcaec361.h1                     | 0.000434563  | 0.001167114 | 0.710215361 |
| c182.pcaec365                   | -0.009275913 | 0.024914358 | 0.710235896 |
| pcaac320.h1                     | 0.00048628   | 0.001306197 | 0.710254663 |
| lysopcac204.pcaec385            | 0.010525178  | 0.028275994 | 0.710296657 |
| pcaec360.pcaec402               | -0.015467126 | 0.041561961 | 0.710359009 |
| lysopcac181.methioninesulfoxide | -0.022090523 | 0.059360022 | 0.710360072 |
| pcaac365.pcaac422               | -0.011085004 | 0.029787755 | 0.710368884 |
| pcaec382.smc181                 | 0.00120671   | 0.003243203 | 0.710413071 |
| smc241.pcaac381                 | 0.012878765  | 0.034614168 | 0.710418377 |
| pcaac405.lysopcac281            | 0.004011057  | 0.010785711 | 0.710552137 |
| h1.serine                       | 0.0121491    | 0.032671826 | 0.710577183 |
| smc241.pcaac342                 | 0.000424822  | 0.001142478 | 0.710584217 |
| pcaac381.pcaac322               | 0.018359722  | 0.049375628 | 0.71058816  |
| pcaac300.pcaac426               | 0.021987618  | 0.059139788 | 0.710623172 |
| c102.pcaac342                   | -0.006058152 | 0.016304246 | 0.710787843 |
| leucine.putrescine              | 0.009528882  | 0.025654547 | 0.710890689 |
| pcaec446.smc241                 | 0.005417257  | 0.014585531 | 0.710903637 |
| pcaec385.smc180                 | -0.006128397 | 0.016501109 | 0.710918566 |
| pcaec404.smc161                 | -0.022790112 | 0.061406306 | 0.711109283 |
| pcaec301.serine                 | 0.012181289  | 0.032829942 | 0.711179345 |
| pcaec443.c14                    | 0.012787801  | 0.034473454 | 0.711250493 |
| pcaec385.pcaec425               | 0.00391357   | 0.010550363 | 0.711253873 |
| prolinr.pcaac424                | 0.003988308  | 0.010753449 | 0.711294993 |
| lysine.valine                   | 0.022061789  | 0.059484456 | 0.711297353 |
| pcaec380.asparticacid           | -0.012562043 | 0.033875569 | 0.711337683 |
| prolinr.pcaec402                | -0.008940347 | 0.024113991 | 0.711393776 |
| spermidine.pcaac240             | -0.01293404  | 0.034886315 | 0.711397691 |
| pcaac360.pcaac420               | -0.053077301 | 0.143182466 | 0.711435823 |
| pcaec382.lysopcac182            | -0.017759517 | 0.04791304  | 0.711462199 |
| alphaaminoadipicacid.pcaac342   | -0.000727783 | 0.001963614 | 0.711482333 |
| pcaec364.pcaec301               | 0.02409191   | 0.065022628 | 0.711570455 |
| smohc221.pcaec403               | -0.007673489 | 0.020711326 | 0.711584239 |
| pcaac362.pcaec342               | -0.035168169 | 0.094923798 | 0.71159079  |
| pcaec420.alanine                | -0.002933484 | 0.007917933 | 0.711592524 |
| pcaac385.c3                     | 0.008422488  | 0.02273736  | 0.711637897 |
| pcaac426.c8                     | 0.013652593  | 0.03685714  | 0.711642237 |
| pcaec406.threonine              | 0.011315716  | 0.030551448 | 0.711669654 |
| pcaac402.smc240                 | 0.020989547  | 0.056671608 | 0.711677722 |
| smohc241.pcaac383               | 0.002060236  | 0.005563065 | 0.711699637 |
| asparticacid.pcaec361           | 0.002869189  | 0.00774829  | 0.711731113 |
| c0.c141oh                       | -0.033900803 | 0.091565245 | 0.711777987 |
| pcaec445.pcaac322               | 0.019124478  | 0.05165674  | 0.711788591 |
| phenylalanine.pcaec405          | 0.019964894  | 0.05396049  | 0.71196056  |
| pcaac404.pcaec425               | 0.002028887  | 0.005484045 | 0.711982222 |

|                                    |              |             |             |
|------------------------------------|--------------|-------------|-------------|
| alphaaminoadipicacid.c102          | 0.00607518   | 0.016421518 | 0.71198922  |
| pcaac404.ileucine                  | -0.009362248 | 0.025308028 | 0.712004455 |
| pcaac384.lysopcac204               | -0.004556355 | 0.01231786  | 0.712029449 |
| pcaac421.pcaac426                  | 0.028399079  | 0.076786022 | 0.712067597 |
| pcaac401.taurine                   | -0.018831897 | 0.050950107 | 0.712240472 |
| pcaec363.pcaec320                  | -0.023089013 | 0.062483283 | 0.712308444 |
| lysopcac204.lysopcac181            | -0.020973982 | 0.056762734 | 0.712323594 |
| histidine.pcaec420                 | -0.008409617 | 0.022765148 | 0.712394346 |
| pcaec385.pcaac385                  | -0.011731394 | 0.031757473 | 0.712395633 |
| c181.smc260                        | 0.007408881  | 0.020058884 | 0.712432204 |
| prolinr.creatinine                 | 0.003343794  | 0.009053156 | 0.712436198 |
| pcaac364.c142                      | 0.006138592  | 0.016621354 | 0.712459726 |
| pcaec405.smc261                    | 0.025286246  | 0.068482183 | 0.712520158 |
| smohc141.glycine                   | -0.015021587 | 0.040688434 | 0.7125593   |
| pcaec446.acetylorithoine           | -0.016789013 | 0.045497889 | 0.712692602 |
| pcaac422.lysine                    | 0.026018127  | 0.070522076 | 0.71274504  |
| c12.pcaac342                       | 0.000671453  | 0.001820026 | 0.712753132 |
| c2.smc181                          | -0.00415486  | 0.011264769 | 0.712818823 |
| pcaac402.pcaec403                  | 0.047853118  | 0.129743567 | 0.712824969 |
| pcaac401.lysopcac204               | -0.027459866 | 0.074463668 | 0.712869445 |
| pcaec386.pcaac383                  | 0.002053803  | 0.005569412 | 0.712872369 |
| pcaec386.c8                        | -0.01501719  | 0.040724885 | 0.71288533  |
| pcaac360.pcaec420                  | 0.007919892  | 0.021492373 | 0.71307091  |
| smc181.serine                      | -0.016517243 | 0.044826529 | 0.713091368 |
| lysopcac181.pcaac405               | 0.012024356  | 0.032637414 | 0.713126934 |
| pcaec381.pcaec341                  | -0.012236281 | 0.0332147   | 0.713143955 |
| asymmetricdimethylarginine.pcaac42 | -0.001583663 | 0.004299265 | 0.713175841 |
| pcaec361.c8                        | 0.012734933  | 0.03459022  | 0.713317921 |
| pcaac381.lysopcac170               | 0.013051196  | 0.035451462 | 0.713335038 |
| pcaac381.pcaec425                  | -0.000545207 | 0.001481501 | 0.71343368  |
| pcaac366.lysopcac203               | 0.01566682   | 0.042574745 | 0.713453171 |
| smc181.pcaec386                    | 0.00551577   | 0.014989813 | 0.71346506  |
| pcaec386.pcaec422                  | -0.006067348 | 0.016494377 | 0.713557707 |
| pcaec422.taurine                   | -0.018595861 | 0.050577177 | 0.713684485 |
| glutamine.ornithine                | -0.008009799 | 0.021788977 | 0.713732953 |
| pcaac323.pcaec420                  | -0.009235601 | 0.025124815 | 0.713747123 |
| glutamine.pcaec421                 | 0.002191443  | 0.00596303  | 0.71380957  |
| smc260.pcaec425                    | 0.000854169  | 0.002324905 | 0.71388799  |
| pcaac361.pcaac363                  | -0.003805847 | 0.010360535 | 0.713931681 |
| smohc222.pcaec423                  | 0.004979994  | 0.013557656 | 0.713947345 |
| pcaac322.pcaec425                  | -0.002210582 | 0.006018231 | 0.713951425 |
| pcaec404.lysopcac140               | 0.000660717  | 0.001799025 | 0.713988978 |
| pcaec380.pcaac321                  | 0.006884193  | 0.0187465   | 0.714017438 |
| pcaec420.pcaec382                  | -0.004132271 | 0.011258557 | 0.714160081 |
| smc160.lysopcac160                 | -0.008025985 | 0.021876489 | 0.714276674 |

|                                |              |             |             |
|--------------------------------|--------------|-------------|-------------|
| pcaec361.smc240                | 0.014742872  | 0.040191947 | 0.71432549  |
| creatinine.pcaec443            | 0.017541204  | 0.047832781 | 0.71439418  |
| c141oh.lysopcac180             | -0.012990871 | 0.035443155 | 0.714537371 |
| pcaec406.pcaac426              | -0.030691113 | 0.083747129 | 0.714577056 |
| lysopcac203.pcaac380           | 0.024269907  | 0.06622834  | 0.714588662 |
| c5.c18                         | -0.031149748 | 0.085011151 | 0.714617293 |
| c4.pcaac403                    | 0.00375779   | 0.010258368 | 0.714695455 |
| smc260.h1                      | 0.000350526  | 0.000957286 | 0.714805769 |
| pcaac384.pcaec362              | -0.003768033 | 0.010292142 | 0.714849404 |
| pcaec401.h1                    | 0.000377167  | 0.001030266 | 0.714864862 |
| lysopcac181.alanine            | -0.007569965 | 0.020684275 | 0.714946906 |
| pcaec380.pcaac342              | -0.00209928  | 0.005736195 | 0.71495139  |
| c5.glycine                     | -0.016151677 | 0.0441388   | 0.714982315 |
| lysopcac204.pcaac240           | 0.00566023   | 0.015468686 | 0.714992623 |
| c51dc.pcaac342                 | 0.000777562  | 0.00212544  | 0.715051839 |
| isoleucine.putrescine          | 0.010510782  | 0.028731339 | 0.715056286 |
| pcaac366.pcaec403              | -0.006945198 | 0.018993225 | 0.715177483 |
| pcaec384.putrescine            | -0.019253974 | 0.052693885 | 0.715381633 |
| c2.pcaec322                    | -0.018577389 | 0.050842797 | 0.715384716 |
| pcaec362.lysopcac182           | 0.010584519  | 0.028974464 | 0.715447061 |
| putrescine.pcaec301            | -0.019133494 | 0.052381661 | 0.715472548 |
| acetylmethionine.pcaac385      | 0.003291387  | 0.009011786 | 0.715501918 |
| asparagine.methioninesulfoxide | -0.004085091 | 0.011190368 | 0.715633854 |
| citruiline.smc180              | -0.008586407 | 0.023526432 | 0.7156977   |
| pcaec340.pcaac383              | 0.001426848  | 0.003909836 | 0.715720437 |
| smohc222.pcaec420              | 0.00508586   | 0.013938045 | 0.715755811 |
| c142.pcaec363                  | -0.003372199 | 0.009244161 | 0.715828949 |
| pcaac320.pcaac381              | -0.013936766 | 0.038224329 | 0.715968765 |
| putrescine.pcaec363            | 0.008530303  | 0.023401177 | 0.716028416 |
| pcaac420.smc241                | 0.00370865   | 0.010175069 | 0.716058612 |
| pcaec382.lysopcac280           | 0.003048192  | 0.008364044 | 0.716091407 |
| pcaec381.asparagine            | 0.004613009  | 0.012658047 | 0.716096638 |
| phenylalanine.smc241           | 0.003489412  | 0.009575282 | 0.716107196 |
| prolinr.smc241                 | 0.002064265  | 0.005666049 | 0.716179397 |
| pcaec443.smc161                | 0.028674351  | 0.078714833 | 0.716209508 |
| pcaec420.c142                  | 0.008459286  | 0.023229182 | 0.716295228 |
| alanine.pcaac342               | -0.000950155 | 0.002609544 | 0.71633894  |
| pcaac366.pcaac342              | -0.001056729 | 0.002902419 | 0.716355368 |
| smc261.pcaac342                | 0.000441402  | 0.00121262  | 0.716413959 |
| prolinr.lysopcac182            | -0.006689545 | 0.018383736 | 0.716505664 |
| glutamicacid.lysopcac161       | 0.020258597  | 0.055678131 | 0.716529466 |
| pcaec445.c182                  | -0.014195226 | 0.039018152 | 0.716560119 |
| pcaec406.pcaac363              | 0.00301043   | 0.008278238 | 0.716675518 |
| h1.pcaec386                    | 0.003302352  | 0.009081295 | 0.716684921 |
| lysopcac170.pcaec386           | 0.003613006  | 0.009937218 | 0.716729679 |

|                              |              |             |             |
|------------------------------|--------------|-------------|-------------|
| pcaac426.c182                | 0.008643719  | 0.023774292 | 0.716736429 |
| alanine.alphaaminoadipicacid | 0.002345504  | 0.006451352 | 0.716741165 |
| pcaac405.lysopcac204         | -0.004315311 | 0.011872239 | 0.716807264 |
| spermidine.glutamicacid      | -0.010164392 | 0.027968832 | 0.716852413 |
| pcaac404.lysopcac170         | 0.004061319  | 0.011176595 | 0.716883246 |
| smc241.pcaac320              | 0.014256858  | 0.039249928 | 0.716990905 |
| pcaec421.pcaec406            | -0.02067816  | 0.056932082 | 0.717009686 |
| smohc141.acetylmithoine      | -0.007819623 | 0.021531992 | 0.717042875 |
| c181.asparagine              | -0.011894647 | 0.032756613 | 0.717073412 |
| lysopcac280.pcaec445         | -0.037203867 | 0.10247033  | 0.717112432 |
| pcaac404.pcaec445            | -0.00773415  | 0.021307611 | 0.717182257 |
| lysopcac281.tyrosine         | -0.020909957 | 0.057618447 | 0.717235991 |
| c101.lysopcac161             | -0.017977075 | 0.049541407 | 0.717261462 |
| pcaac385.c51                 | -0.011871366 | 0.032716828 | 0.717274656 |
| pcaec362.pcaac343            | 0.009518263  | 0.026235239 | 0.717310042 |
| smc202.pcaac425              | -0.021895079 | 0.060378241 | 0.71743868  |
| leucine.smc241               | 0.006123858  | 0.016887309 | 0.717439544 |
| pcaec381.lysopcac140         | 0.00062147   | 0.001713804 | 0.717443202 |
| lysopcac182.smc260           | 0.010724679  | 0.02957584  | 0.717450407 |
| smc161.pcaac300              | -0.016151018 | 0.044543546 | 0.717470391 |
| pcaac420.c16                 | 0.010180031  | 0.028080447 | 0.717513964 |
| pcaac404.pcaec421            | 0.00035618   | 0.000983019 | 0.71766159  |
| lysine.pcaec361              | 0.005184458  | 0.014314182 | 0.717767912 |
| citruiline.pcaac384          | -0.022464384 | 0.062025799 | 0.717777027 |
| lysopcac182.pcaec365         | 0.006304358  | 0.017411583 | 0.717851344 |
| c18.pcaec384                 | -0.007881941 | 0.021774244 | 0.717921271 |
| pcaec406.pcaac366            | 0.00777416   | 0.021478346 | 0.717944552 |
| h1.c141oh                    | 0.021143812  | 0.058417334 | 0.717951443 |
| pcaac381.smc181              | 0.001609328  | 0.004447547 | 0.718024474 |
| lysopcac180.pcaac300         | -0.011772256 | 0.03253711  | 0.718051367 |
| c14.pcaec342                 | -0.020444539 | 0.056523883 | 0.718135457 |
| pcaac402.pcaac344            | 0.024136292  | 0.066733224 | 0.718145947 |
| lysopcac160.smc241           | -0.014773289 | 0.040848498 | 0.71816291  |
| prolinr.arginine             | 0.006496831  | 0.017963958 | 0.7181639   |
| pcaac401.c51                 | -0.03257342  | 0.090067465 | 0.718166449 |
| pcaec340.pcaac361            | 0.012662255  | 0.035012233 | 0.718169037 |
| smc181.pcaac240              | -0.003114041 | 0.008611824 | 0.71820754  |
| histidine.pcaec362           | 0.004207059  | 0.011634624 | 0.71820937  |
| lysopcac203.pcaac342         | -0.001201476 | 0.003323548 | 0.718279607 |
| smc202.pcaac321              | 0.009023218  | 0.024962514 | 0.718304462 |
| c18.c4                       | -0.010308971 | 0.028521386 | 0.718322091 |
| pcaec384.methioninesulfoxide | 0.003776786  | 0.010450163 | 0.718350234 |
| smc161.pcaec420              | 0.004123086  | 0.011409093 | 0.718367646 |
| lysine.pcaec341              | 0.010625325  | 0.029408678 | 0.718432538 |
| pcaac422.pcaac322            | 0.024156153  | 0.066881181 | 0.718521177 |

|                                   |              |             |             |
|-----------------------------------|--------------|-------------|-------------|
| pcaec300.pcaac425                 | -0.029669729 | 0.08214901  | 0.718528981 |
| c14.pcaac344                      | -0.023436072 | 0.064915142 | 0.718635916 |
| smc260.pcaec382                   | -0.005035795 | 0.013949317 | 0.718650606 |
| pcaec425.smc181                   | 0.004107398  | 0.011378051 | 0.718660688 |
| asymmetricdimethylarginine.smc181 | -0.006849601 | 0.018975945 | 0.718683631 |
| pcaec402.glutamicacid             | 0.02273191   | 0.062985082 | 0.718723065 |
| lysopcac170.pcaac342              | 0.003595316  | 0.009964966 | 0.718807945 |
| smohc241.pcaac342                 | 0.000691126  | 0.001915622 | 0.718816428 |
| smc241.lysopcac161                | -0.025258092 | 0.070017678 | 0.718850356 |
| pcaec362.pcaac342                 | 0.000700347  | 0.001941455 | 0.718854511 |
| pcaac404.pcaec386                 | 0.002386146  | 0.006614721 | 0.718854865 |
| c142.c14                          | -0.014874253 | 0.041242645 | 0.718914888 |
| smc202.lysine                     | -0.018941989 | 0.052526701 | 0.718941651 |
| smohc141.methioninesulfoxide      | 0.003350614  | 0.00929156  | 0.718947669 |
| pcaac320.pcaec363                 | -0.008915129 | 0.024723413 | 0.718957909 |
| smohc221.c51                      | -0.011095217 | 0.030769797 | 0.718962892 |
| asparagine.alanine                | -0.015417398 | 0.042757088 | 0.718967971 |
| smohc222.pcaac344                 | 0.024210049  | 0.067144073 | 0.718977248 |
| asparticacid.smohc241             | 0.019677591  | 0.054580608 | 0.719010962 |
| smc180.smc260                     | -0.01197033  | 0.03320987  | 0.719069542 |
| smc180.h1                         | 0.00036912   | 0.001024198 | 0.719104127 |
| pcaac425.pcaec386                 | 0.005922871  | 0.016440989 | 0.719214771 |
| leucine.pcaac342                  | -0.001298195 | 0.003603709 | 0.71922342  |
| phenylalanine.pcaac420            | 0.02023738   | 0.056192661 | 0.719294996 |
| c141oh.pcaec422                   | 0.00492226   | 0.013669762 | 0.719339003 |
| asparticacid.pcaec365             | 0.007152784  | 0.019871261 | 0.719434184 |
| pcaac401.c3                       | -0.010155264 | 0.02821452  | 0.719453424 |
| pcaac362.pcaac385                 | -0.00521356  | 0.01448524  | 0.719459525 |
| methioninesulfoxide.c141oh        | 0.035465306  | 0.098541582 | 0.719474674 |
| pcaac403.pcaac342                 | -0.005735184 | 0.015942869 | 0.719600334 |
| pcaac320.pcaec386                 | 0.003310063  | 0.009201664 | 0.719607188 |
| c10.smohc141                      | 0.011066455  | 0.030773244 | 0.719690372 |
| smc240.c182                       | -0.014096601 | 0.039218138 | 0.719818741 |
| pcaec405.c18                      | -0.01399663  | 0.038944838 | 0.71985201  |
| pcaec422.pcaac321                 | 0.004650731  | 0.012942812 | 0.719902025 |
| pcaec321.methioninesulfoxide      | 0.004962389  | 0.013813427 | 0.719965759 |
| pcaac364.smc202                   | 0.011868775  | 0.033038308 | 0.719966536 |
| pcaac404.smohc141                 | -0.003962136 | 0.011030123 | 0.719990631 |
| pcaac343.smc202                   | 0.013667288  | 0.038050943 | 0.720010471 |
| pcaac421.pcaac425                 | 0.034049704  | 0.094800261 | 0.720018571 |
| pcaec422.smc240                   | 0.012496418  | 0.034793808 | 0.720031058 |
| pcaec361.lysopcac280              | 0.0045707    | 0.012728861 | 0.720086879 |
| pcaec365.pcaec384                 | -0.009371894 | 0.026103604 | 0.720127742 |
| pcaec343.smohc141                 | 0.002650714  | 0.007392167 | 0.720458149 |
| c51dc.alanine                     | 0.003951277  | 0.011019209 | 0.720460684 |



|                          |              |             |             |
|--------------------------|--------------|-------------|-------------|
| pcaec420.smc181          | 0.004072362  | 0.011360695 | 0.720550371 |
| pcaac422.smohc141        | -0.014009946 | 0.039089387 | 0.72058975  |
| pcaec365.lysopcac140     | 0.000306296  | 0.000854642 | 0.720602446 |
| pcaec340.pcaac424        | -0.00663338  | 0.018512324 | 0.720653595 |
| pcaac341.c16             | 0.011172889  | 0.031181136 | 0.720653847 |
| pcaec445.asparagine      | -0.003654494 | 0.010202102 | 0.720737555 |
| lysine.pcaec444          | 0.047306437  | 0.132097372 | 0.720806252 |
| glutamicacid.taurine     | -0.011362105 | 0.031730069 | 0.720829829 |
| c5.lysopcac280           | 0.006261761  | 0.017489305 | 0.720869125 |
| smc202.pcaec384          | -0.011421616 | 0.031901475 | 0.72087352  |
| serine.pcaec421          | 0.00077176   | 0.002155887 | 0.720910846 |
| c3.pcaec386              | 0.004162933  | 0.011630092 | 0.720935367 |
| pcaec301.pcaec380        | 0.017389517  | 0.04858585  | 0.72095911  |
| serotonin.pcaac420       | 0.026375688  | 0.073695478 | 0.7209682   |
| glutamicacid.lysopcac203 | 0.000926637  | 0.00258947  | 0.721007723 |
| phenylalanine.pcaac342   | -0.001659409 | 0.004637394 | 0.721019631 |
| lysopcac170.c14          | 0.017427775  | 0.048705007 | 0.721026419 |
| smc202.pcaec383          | 0.021697405  | 0.060639813 | 0.721037728 |
| c3.smc181                | 0.006191378  | 0.017304761 | 0.721055069 |
| smohc141.glutamicacid    | 0.011826052  | 0.033055331 | 0.721069518 |
| lysopcac140.pcaac424     | -0.001714739 | 0.004794171 | 0.7211394   |
| pcaec380.smc202          | -0.020541713 | 0.057433487 | 0.721147504 |
| pcaec383.putrescine      | 0.026846732  | 0.075068801 | 0.721171816 |
| pcaec444.pcaac425        | 0.021206594  | 0.05930156  | 0.7211885   |
| smc181.c141oh            | 0.023804713  | 0.066587827 | 0.721272552 |
| pcaac360.pcaec401        | -0.015640037 | 0.043750031 | 0.721277899 |
| pcaac300.pcaec423        | 0.002113151  | 0.005911249 | 0.721282912 |
| c102.pcaec382            | 0.005624571  | 0.015734269 | 0.721288071 |
| smc202.pcaec406          | 0.004870298  | 0.013624901 | 0.721300802 |
| pcaec444.smc160          | -0.020267044 | 0.056718091 | 0.721395046 |
| c5.lysine                | -0.043832015 | 0.122702413 | 0.721475207 |
| pcaac344.pcaac366        | 0.004283662  | 0.011992112 | 0.721486778 |
| pcaec424.pcaec384        | -0.008139002 | 0.022787519 | 0.721514652 |
| pcaac384.glycine         | 0.008486429  | 0.023760493 | 0.721517459 |
| pcaac402.lysine          | 0.02555327   | 0.071544934 | 0.72151866  |
| pcaac384.smohc241        | 0.021563825  | 0.060383913 | 0.721557387 |
| pcaac386.pcaec446        | 0.018253932  | 0.051119988 | 0.721581257 |
| pcaec380.pcaac406        | 0.014898376  | 0.041726764 | 0.721606712 |
| pcaec361.pcaac361        | 0.010997177  | 0.03080748  | 0.721667621 |
| pcaac364.isoleucine      | -0.01032254  | 0.028923094 | 0.721718695 |
| pcaac381.putrescine      | 0.018558143  | 0.052005627 | 0.721754078 |
| pcaac420.pcaec446        | 0.033279672  | 0.093273337 | 0.721792532 |
| smc180.pcaac424          | 0.003699851  | 0.010369858 | 0.721798742 |
| smohc161.h1              | 0.000494945  | 0.001387268 | 0.721807949 |
| pcaac366.lysopcac180     | 0.018619252  | 0.052193601 | 0.721839507 |

|                               |              |             |             |
|-------------------------------|--------------|-------------|-------------|
| smohc222.pcaec421             | 0.000389318  | 0.00109147  | 0.72187171  |
| pcaec380.phenylalanine        | -0.015009717 | 0.04208525  | 0.721902326 |
| pcaac365.pcaac380             | -0.016293112 | 0.045696282 | 0.721975579 |
| pcaac424.pcaac320             | -0.018691366 | 0.052436962 | 0.722048951 |
| pcaec340.pcaec406             | 0.003116363  | 0.008742985 | 0.722058236 |
| pcaac344.pcaec425             | -0.002842048 | 0.007977535 | 0.722196538 |
| pcaac363.pcaac342             | 0.02798207   | 0.078546861 | 0.722203752 |
| pcaac422.spermidine           | -0.018227629 | 0.051173672 | 0.722245061 |
| pcaac344.c182                 | 0.010199053  | 0.028635314 | 0.72226082  |
| lysopcac182.pcaac366          | -0.003493186 | 0.009810208 | 0.722330921 |
| c18.pcaec322                  | 0.019431283  | 0.054584908 | 0.722401102 |
| pcaec422.pcaac361             | -0.017245053 | 0.048444954 | 0.722408998 |
| pcaac381.c4                   | -0.007026037 | 0.019752689 | 0.722612117 |
| pcaac420.creatinine           | -0.005172142 | 0.014541567 | 0.722627426 |
| lysopcac280.c12               | 0.017309116  | 0.048666042 | 0.722633766 |
| pcaac361.valine               | 0.015245475  | 0.042865783 | 0.722645191 |
| c0.asymmetricdimethylarginine | 0.001735273  | 0.004879165 | 0.722650041 |
| smc261.pcaac365               | -0.010144373 | 0.028523615 | 0.722651039 |
| smohc221.c12                  | 0.018083642  | 0.050861578 | 0.722727268 |
| c101.tryptophan               | 0.003486234  | 0.009807265 | 0.722780775 |
| pcaec444.pcaac364             | -0.011223879 | 0.031576103 | 0.722795556 |
| lysopcac280.arginine          | 0.011722825  | 0.032986095 | 0.72284635  |
| c8.lysopcac140                | -0.000509549 | 0.001434143 | 0.722912292 |
| smc241.pcaac363               | 0.002232485  | 0.006283863 | 0.722931669 |
| pcaac401.pcaec365             | -0.006986655 | 0.019666269 | 0.722940572 |
| putrescine.pcaec380           | -0.015653459 | 0.044064    | 0.722953346 |
| asparagine.pcaac281           | -0.000606814 | 0.001708212 | 0.722960888 |
| lysopcac160.pcaac342          | -0.001336041 | 0.003761867 | 0.723020531 |
| pcaac321.acetylmethionine     | 0.002446961  | 0.00689075  | 0.723054774 |
| pcaac364.pcaac363             | 0.002520233  | 0.007097512 | 0.723070648 |
| pcaac420.pcaec384             | 0.005938036  | 0.016723329 | 0.723079465 |
| smohc241.lysopcac182          | -0.006665702 | 0.01877468  | 0.723108014 |
| pcaec421.pcaec322             | 0.019623428  | 0.055294605 | 0.723218737 |
| kynurenine.pcaec362           | -0.003499986 | 0.009868469 | 0.723387021 |
| pcaac364.pcaec301             | 0.026341733  | 0.074280652 | 0.723416263 |
| lysopcac204.pcaac422          | 0.02966613   | 0.083687129 | 0.723517831 |
| pcaec381.pcaac323             | -0.021174365 | 0.05975316  | 0.723611002 |
| alphaaminoadipicacid.pcaac380 | 0.011706329  | 0.033042519 | 0.723673191 |
| smc202.c142                   | 0.009692089  | 0.027367387 | 0.723772901 |
| lysopcac140.lysopcac281       | 0.004091576  | 0.011556605 | 0.723848301 |
| pcaec365.smc241               | -0.005498321 | 0.015530781 | 0.723862683 |
| pcaec403.pcaec422             | -0.019004997 | 0.05371196  | 0.724008916 |
| pcaec365.pcaec385             | -0.029473836 | 0.083299186 | 0.724009466 |
| pcaec404.kynurenine           | 0.002719397  | 0.007685717 | 0.724014165 |
| pcaec384.pcaac342             | 0.003140668  | 0.008878003 | 0.724063802 |

|                                  |              |             |             |
|----------------------------------|--------------|-------------|-------------|
| c8.pcaec322                      | -0.014209101 | 0.040166338 | 0.724065231 |
| pcaac383.smc180                  | -0.003668156 | 0.010370101 | 0.724089303 |
| pcaec385.c51                     | -0.008485795 | 0.023990225 | 0.72409334  |
| c2.pcaac342                      | 0.001482972  | 0.004192702 | 0.724105033 |
| creatinine.pcaac383              | 0.001494857  | 0.004226488 | 0.724116659 |
| smc261.glutamicacid              | 0.012537278  | 0.035449567 | 0.724133485 |
| smohc221.taurine                 | 0.008178317  | 0.02312779  | 0.724171545 |
| c141.pcaac422                    | 0.016828985  | 0.047591732 | 0.724173608 |
| pcaac402.pcaac342                | -0.002189024 | 0.00619077  | 0.724186128 |
| pcaec401.smohc241                | 0.01674073   | 0.047346396 | 0.724197329 |
| serotonin.c10                    | -0.005813865 | 0.016457833 | 0.724437843 |
| smohc222.pcaec403                | -0.006611749 | 0.018716786 | 0.724442231 |
| c2.asparagine                    | 0.008773922  | 0.024841394 | 0.724483137 |
| lysopcac280.c5                   | -0.004623004 | 0.01309333  | 0.724570529 |
| citruiline.pcaac421              | 0.00616124   | 0.017451117 | 0.724588283 |
| lysopcac203.lysopcac160          | 0.00676428   | 0.019160055 | 0.72460051  |
| pcaec360.pcaec341                | -0.020909481 | 0.059237339 | 0.724647392 |
| pcaec446.asparagine              | -0.003403739 | 0.009644918 | 0.724702059 |
| prolinr.pcaec342                 | 0.029184981  | 0.082707899 | 0.724729634 |
| pcaac380.glutamine               | -0.004918766 | 0.013941037 | 0.724760825 |
| pcaec340.smc161                  | -0.028457897 | 0.08065988  | 0.724770471 |
| pcaec406.lysopcac182             | -0.005017116 | 0.014220915 | 0.724781796 |
| pcaac403.c101                    | 0.019485268  | 0.055271418 | 0.724976693 |
| phenylalanine.lysopcac180        | 0.014840178  | 0.042105744 | 0.725042277 |
| prolinr.lysopcac160              | -0.008489383 | 0.024087803 | 0.725053708 |
| c14.pcaec402                     | -0.011261511 | 0.031976811 | 0.725246351 |
| pcaac365.methioninesulfoxide     | 0.006370451  | 0.018092383 | 0.725299212 |
| pcaec340.lysopcac140             | -0.000236754 | 0.00067264  | 0.725396449 |
| c3.asymmetricdicdimethylarginine | 0.004331349  | 0.012306436 | 0.72541051  |
| c8.c102                          | 0.009731606  | 0.027650805 | 0.725419097 |
| pcaec361.pcaec340                | 0.020324538  | 0.057753899 | 0.725441764 |
| lysopcac180.smc161               | 0.020592506  | 0.05852461  | 0.725483411 |
| pcaec322.pcaec301                | -0.01790749  | 0.050909373 | 0.725564471 |
| smc202.pcaac404                  | 0.001977245  | 0.005622227 | 0.725615977 |
| smc202.pcaac424                  | -0.002394353 | 0.006808395 | 0.725621191 |
| pcaac404.ornithine               | -0.003553109 | 0.0101043   | 0.725646053 |
| pcaac342.pcaac381                | 0.009803229  | 0.027879408 | 0.725656202 |
| pcaac380.histidine               | 0.015358754  | 0.043693579 | 0.725745399 |
| smc181.threonine                 | -0.012206906 | 0.034729347 | 0.72576319  |
| isoleucine.pcaec404              | 0.006341556  | 0.018044805 | 0.725802783 |
| pcaec385.pcaac322                | 0.01381549   | 0.039324005 | 0.725884577 |
| pcaac362.smc260                  | -0.010674323 | 0.030395042 | 0.725988059 |
| smc241.pcaec422                  | -0.011256657 | 0.03205737  | 0.726021976 |
| pcaac406.pcaec340                | 0.02203717   | 0.062761843 | 0.726034941 |
| pcaac381.pcaac281                | 0.000779248  | 0.002219893 | 0.726105268 |

|                                    |              |             |             |
|------------------------------------|--------------|-------------|-------------|
| pcaec402.pcaec420                  | 0.005631757  | 0.016043898 | 0.72611123  |
| smohc161.serotonin                 | 0.024809313  | 0.070678973 | 0.726117001 |
| lysopcac203.pcaec420               | 0.008578497  | 0.024440374 | 0.726129789 |
| c8.taurine                         | -0.013164689 | 0.037506908 | 0.726132223 |
| pcaec424.pcaac380                  | -0.018246382 | 0.051992694 | 0.726171487 |
| c102.pcaec425                      | -0.001564125 | 0.004458597 | 0.726268962 |
| glutamicacid.c16                   | 0.020038302  | 0.057140288 | 0.726362534 |
| smc241.serotonin                   | 0.020173664  | 0.057529705 | 0.72637817  |
| histidine.smc260                   | 0.004747551  | 0.013539003 | 0.726384031 |
| pcaac281.alphaaminoadipicacid      | -0.001169741 | 0.003337195 | 0.726489644 |
| pcaec424.asymmetricdimethylarginir | 0.004184135  | 0.011940636 | 0.726568144 |
| pcaac365.pcaac342                  | -0.001049842 | 0.002996967 | 0.726650381 |
| c2.pcaac322                        | -0.015630786 | 0.044621829 | 0.726655608 |
| smohc161.lysopcac204               | 0.007764611  | 0.022166227 | 0.72665894  |
| pcaec360.pcaac361                  | 0.015533688  | 0.044348083 | 0.726675973 |
| c3.lysopcac280                     | 0.001933494  | 0.00552176  | 0.726757116 |
| c5.asymmetricdimethylarginine      | 0.008362086  | 0.023884518 | 0.726797668 |
| c162.pcaec445                      | 0.024280045  | 0.069352134 | 0.726802797 |
| c142.threonine                     | 0.00799537   | 0.022841161 | 0.726844616 |
| c102.pcaac383                      | -0.001369205 | 0.003912335 | 0.726897745 |
| pcaac402.lysopcac160               | 0.010077669  | 0.028799975 | 0.726936577 |
| pcaac365.pcaec385                  | 0.015027767  | 0.042964876 | 0.727049431 |
| pcaac240.c12                       | 0.025966675  | 0.074245204 | 0.727069299 |
| pcaec401.pcaac402                  | -0.018437534 | 0.052724601 | 0.727104522 |
| pcaec364.lysopcac203               | -0.004626762 | 0.013233185 | 0.727150819 |
| pcaac405.glycine                   | -0.011434241 | 0.032708192 | 0.727188168 |
| smohc241.pcaac320                  | 0.017978335  | 0.051460949 | 0.727356381 |
| pcaec403.alanine                   | 0.006793258  | 0.019447541 | 0.727391486 |
| smc180.glycine                     | 0.017341429  | 0.04964609  | 0.727399664 |
| pcaec402.methionine                | -0.007451834 | 0.021343816 | 0.727525363 |
| pcaec421.pcaac342                  | -0.003957846 | 0.011339723 | 0.727606482 |
| pcaac323.pcaec386                  | -0.002530894 | 0.007251507 | 0.727612906 |
| asymmetricdimethylarginine.pcaec40 | -0.015228801 | 0.043644234 | 0.727677237 |
| ornithine.pcaec363                 | 0.005331042  | 0.015278575 | 0.727683024 |
| pcaec340.pcaec341                  | -0.04536405  | 0.130024547 | 0.727708751 |
| pcaac300.pcaec382                  | 0.002647703  | 0.007589529 | 0.727728038 |
| pcaac420.pcaac424                  | -0.00336467  | 0.009645036 | 0.727737516 |
| pcaac341.pcaec406                  | 0.002475197  | 0.007098112 | 0.727840872 |
| putrescine.pcaec425                | -0.000493768 | 0.001416083 | 0.727860808 |
| smohc161.c162                      | -0.02988486  | 0.08571171  | 0.727874437 |
| pcaac344.lysopcac170               | -0.003512947 | 0.010076082 | 0.727893211 |
| pcaec382.pcaec406                  | -0.014787447 | 0.042432815 | 0.728006548 |
| c141oh.pcaec386                    | -0.000753096 | 0.0021612   | 0.728028163 |
| smohc241.pcaec403                  | -0.004443245 | 0.012753042 | 0.728069594 |
| pcaec361.pcaec365                  | -0.005952739 | 0.017091569 | 0.728160701 |

|                           |              |             |             |
|---------------------------|--------------|-------------|-------------|
| pcaec300.serotonin        | 0.026585261  | 0.076340091 | 0.728188711 |
| creatinine.pcaec341       | -0.023122459 | 0.066424779 | 0.728299457 |
| lysopcac203.c4            | -0.007524686 | 0.021617707 | 0.728314555 |
| pcaec446.smc240           | 0.023773519  | 0.068311383 | 0.72836161  |
| c14.pcaac385              | 0.001926788  | 0.005541636 | 0.728604407 |
| pcaec364.pcaac342         | -0.003036716 | 0.008734426 | 0.728620029 |
| smc202.threonine          | -0.008952136 | 0.025752968 | 0.728662303 |
| smc241.pcaec361           | -0.004274164 | 0.012296814 | 0.728686781 |
| smc160.pcaac365           | 0.018658889  | 0.053701813 | 0.728783775 |
| creatinine.pcaec386       | 0.004756921  | 0.01369179  | 0.728802442 |
| pcaec364.pcaec342         | -0.039395159 | 0.113463    | 0.728968539 |
| pcaac404.lysopcac161      | 0.026101989  | 0.075195494 | 0.729032531 |
| pcaac401.pcaec425         | -0.001136731 | 0.003275548 | 0.729097221 |
| c12.pcaec403              | 0.006189112  | 0.017837125 | 0.729139322 |
| c51dc.pcaec446            | -0.015965949 | 0.046024145 | 0.729195909 |
| pcaac281.pcaac406         | -0.00992221  | 0.028607087 | 0.72924035  |
| pcaec381.pcaac383         | -0.004048342 | 0.011672101 | 0.729244329 |
| c18.c162                  | -0.026440851 | 0.076235235 | 0.729249392 |
| smc161.smc160             | -0.036262142 | 0.104577654 | 0.729312319 |
| c181.pcaec423             | -0.00219391  | 0.006327165 | 0.729315269 |
| pcaac381.pcaac320         | 0.032523935  | 0.093835501 | 0.729419227 |
| smohc241.c101             | 0.006500789  | 0.018769872 | 0.729617299 |
| smohc222.smc181           | 0.016459536  | 0.047535808 | 0.729681887 |
| pcaec360.pcaac380         | 0.009914682  | 0.028640824 | 0.729743701 |
| pcaec380.pcaec341         | -0.006364796 | 0.018389337 | 0.729788434 |
| smc161.c8                 | 0.011170786  | 0.032280904 | 0.729836482 |
| c10.c142                  | 0.019670451  | 0.056849606 | 0.729867064 |
| pcaec342.methionine       | -0.013408086 | 0.038765679 | 0.729967086 |
| alanine.smohc222          | 0.001350223  | 0.003903895 | 0.729974324 |
| pcaac363.pcaac424         | 0.004101886  | 0.011860689 | 0.729994389 |
| pcaec300.pcaac321         | -0.010704267 | 0.030955234 | 0.730024736 |
| methioninesulfoxide.c3    | 0.013869174  | 0.040114709 | 0.73007006  |
| pcaac405.acetylorlithoine | 0.005714027  | 0.01653133  | 0.730137202 |
| c141oh.c3                 | -0.016531383 | 0.047830268 | 0.730153975 |
| pcaac360.pcaac342         | -0.002932988 | 0.008487107 | 0.730187254 |
| creatinine.pcaec446       | -0.024191541 | 0.070018451 | 0.73024666  |
| c2.smc261                 | 0.011477119  | 0.033219012 | 0.730249564 |
| asparagine.pcaec403       | -0.006176626 | 0.017878686 | 0.730267756 |
| c141.pcaec342             | 0.016825649  | 0.048710495 | 0.730307373 |
| c8.methioninesulfoxide    | 0.004178422  | 0.012098279 | 0.730343484 |
| pcaec423.smc202           | -0.013988915 | 0.040508118 | 0.730371373 |
| pcaec381.c2               | -0.037449242 | 0.10846252  | 0.730418264 |
| pcaac323.taurine          | -0.006776857 | 0.01963442  | 0.730509542 |
| c16.pcaec342              | 0.019042662  | 0.0551884   | 0.730587255 |
| asparagine.pcaac300       | -0.028170574 | 0.081679141 | 0.730703638 |

|                              |              |             |             |
|------------------------------|--------------|-------------|-------------|
| pcaec446.pcaec380            | 0.013504101  | 0.039154673 | 0.730705104 |
| pcaac422.methioninesulfoxide | 0.00452588   | 0.01313002  | 0.730850681 |
| pcaac301.pcaec386            | -0.001611169 | 0.004674636 | 0.730877019 |
| pcaac364.pcaac383            | -0.001438492 | 0.004174632 | 0.730938956 |
| pcaac321.tyrosine            | 0.021514252  | 0.062451703 | 0.731002867 |
| pcaac344.pcaec402            | 0.006501331  | 0.018877656 | 0.731078918 |
| smc260.alphaaminoadipicacid  | -0.000631226 | 0.001832994 | 0.731097184 |
| lysopcac281.smc202           | 0.012405365  | 0.03603327  | 0.731167123 |
| smohc221.pcaac321            | 0.006804967  | 0.019767758 | 0.731189296 |
| pcaec340.pcaac321            | -0.009256623 | 0.026890732 | 0.731200387 |
| pcaec403.glutamicacid        | 0.029227177  | 0.084928918 | 0.731270958 |
| c162.pcaec420                | 0.005530502  | 0.01607415  | 0.731327293 |
| c3.c10                       | -0.004356182 | 0.012663807 | 0.731383661 |
| smc160.pcaac403              | -0.001155939 | 0.003360763 | 0.731410343 |
| c51dc.serine                 | 0.004487634  | 0.013048174 | 0.731427668 |
| pcaac422.taurine             | -0.016302201 | 0.047402269 | 0.731439867 |
| pcaec362.pcaec401            | -0.01001083  | 0.029115624 | 0.731501147 |
| pcaec381.smc160              | -0.019208213 | 0.055896832 | 0.731646187 |
| smc161.pcaec406              | 0.002595165  | 0.007553058 | 0.731680442 |
| lysopcac281.c0               | 0.000268184  | 0.000780598 | 0.731701867 |
| pcaec401.pcaac342            | -0.001755431 | 0.005109822 | 0.731718514 |
| lysopcac281.pcaac300         | -0.015934473 | 0.04638358  | 0.731721201 |
| pcaac420.smc260              | -0.010464183 | 0.030466724 | 0.731776919 |
| pcaec361.tyrosine            | -0.016609374 | 0.048359744 | 0.731783039 |
| pcaac323.methioninesulfoxide | 0.005775393  | 0.01681918  | 0.731837945 |
| serotonin.glycine            | -0.010168159 | 0.029614199 | 0.731858372 |
| pcaac425.smc161              | 0.023825305  | 0.069411622 | 0.731939089 |
| pcaec424.pcaec363            | 0.011101446  | 0.032352862 | 0.732021798 |
| pcaac385.pcaac424            | -0.002802114 | 0.008167987 | 0.732078791 |
| pcaec381.pcaac342            | -0.00414136  | 0.012072    | 0.732082908 |
| lysopcac203.c142             | 0.015164051  | 0.044209366 | 0.732120157 |
| pcaec341.smc202              | 0.012060291  | 0.035165888 | 0.732158549 |
| glutamicacid.pcaac342        | -0.001260854 | 0.003677413 | 0.732225907 |
| kynurenine.pcaec425          | 0.000813495  | 0.002372735 | 0.732236037 |
| acetylorithoine.c142         | 0.028762677  | 0.08389339  | 0.732238337 |
| pcaec342.pcaec425            | -0.000793625 | 0.00231499  | 0.732259124 |
| pcaac425.pcaac420            | -0.039665971 | 0.115723104 | 0.732299693 |
| arginine.serotonin           | 0.030891026  | 0.090128535 | 0.732316277 |
| c0.alanine                   | 0.00267866   | 0.007817996 | 0.732403905 |
| lysopcac140.c5               | 0.003217721  | 0.009393571 | 0.732465758 |
| pcaac425.pcaec361            | 0.004249627  | 0.012406329 | 0.73247176  |
| pcaac321.pcaac406            | -0.014766576 | 0.043112585 | 0.732490574 |
| smohc161.pcaac364            | 0.013179188  | 0.038483628 | 0.732527919 |
| pcaac426.c2                  | 0.024436297  | 0.071360332 | 0.732548122 |
| smc241.pcaec343              | 0.022458267  | 0.065588492 | 0.73256584  |

|                                    |              |             |             |
|------------------------------------|--------------|-------------|-------------|
| asparagine.pcaac381                | 0.006420219  | 0.018750807 | 0.732576908 |
| pcaac361.h1                        | -0.000582998 | 0.001702917 | 0.73261003  |
| serine.pcaac422                    | 0.01934609   | 0.056512007 | 0.73262274  |
| pcaac380.putrescine                | 0.00942011   | 0.027519508 | 0.732644736 |
| smc160.pcaac322                    | 0.01487376   | 0.043458355 | 0.732684856 |
| pcaac281.smc202                    | 0.011121029  | 0.032504271 | 0.732769431 |
| lysopcac281.valine                 | 0.012585064  | 0.036789546 | 0.732812939 |
| c14.pcaac323                       | 0.018608512  | 0.054399417 | 0.732820975 |
| pcaec406.lysopcac204               | -0.024667933 | 0.072115051 | 0.732827211 |
| pcaec361.pcaec322                  | 0.020773965  | 0.060739997 | 0.732864003 |
| pcaac365.c182                      | 0.007727549  | 0.022594396 | 0.732866133 |
| pcaac420.methionine                | 0.008815813  | 0.025777917 | 0.732881791 |
| c102.pcaec404                      | -0.004184909 | 0.012237258 | 0.73288929  |
| pcaac364.acetylmethionine          | 0.006622669  | 0.019371043 | 0.732961311 |
| c51dc.smc241                       | 0.005278029  | 0.015440728 | 0.733006279 |
| pcaec321.pcaec386                  | -0.00424369  | 0.012415247 | 0.733015567 |
| pcaec406.pcaac360                  | 0.0144146    | 0.042172083 | 0.733021907 |
| pcaec340.pcaac363                  | 0.00287656   | 0.008415952 | 0.733026291 |
| lysopcac161.pcaec365               | 0.008186486  | 0.023954122 | 0.733057511 |
| pcaac343.alanine                   | -0.005177181 | 0.015153488 | 0.733138219 |
| pcaac363.c8                        | 0.010463778  | 0.030635029 | 0.733203481 |
| lysopcac181.lysopcac140            | -0.000349007 | 0.001022035 | 0.733263585 |
| pcaac405.threonine                 | 0.006831723  | 0.020008599 | 0.733295993 |
| lysopcac280.pcaec425               | -0.001653455 | 0.004842926 | 0.73331318  |
| pcaec381.c8                        | 0.011551166  | 0.033833256 | 0.733314618 |
| pcaec424.pcaac426                  | 0.021861987  | 0.064054699 | 0.733399261 |
| leucine.smohc141                   | -0.003563261 | 0.010440764 | 0.733413012 |
| pcaac425.pcaec445                  | -0.026342589 | 0.07719669  | 0.733445799 |
| pcaec421.pcaac364                  | 0.013660979  | 0.040046933 | 0.73353267  |
| pcaec423.pcaac384                  | -0.011039705 | 0.032363135 | 0.733536006 |
| pcaec404.pcaac344                  | 0.019065686  | 0.055892645 | 0.733541386 |
| pcaac342.c18                       | -0.00962701  | 0.028233884 | 0.733645777 |
| histidine.c101                     | -0.005044256 | 0.014793905 | 0.733649599 |
| asparagine.serotonin               | -0.022236077 | 0.065235821 | 0.733733499 |
| glutamine.pcaec423                 | -0.00330611  | 0.009704164 | 0.733858971 |
| histidine.pcaac343                 | 0.004976538  | 0.01460807  | 0.733873535 |
| pcaac404.taurine                   | 0.005933118  | 0.017430247 | 0.734082664 |
| pcaec301.asymmetricdimethylarginir | -0.006813311 | 0.020016724 | 0.734091037 |
| asparagine.pcaac380                | -0.020190986 | 0.059333125 | 0.734152809 |
| pcaac362.asymmetricdimethylarginir | -0.005038274 | 0.014806205 | 0.734165922 |
| smc160.pcaac363                    | 0.001868714  | 0.00549199  | 0.734180546 |
| pcaac344.pcaac342                  | -0.000797669 | 0.002344285 | 0.734180927 |
| asparticacid.h1                    | 0.001649076  | 0.004846575 | 0.734184892 |
| pcaac365.asparagine                | 0.003527009  | 0.010368134 | 0.734243615 |
| leucine.glutamine                  | 0.006282649  | 0.018469907 | 0.734260053 |

|                                 |              |             |             |
|---------------------------------|--------------|-------------|-------------|
| prolinr.putrescine              | 0.009104037  | 0.026775269 | 0.73436475  |
| lysopcac170.pcaec423            | -0.005031272 | 0.014801019 | 0.734431809 |
| c2.methionine                   | 0.005386682  | 0.015846592 | 0.734432213 |
| pcaec422.alphaaminoadipicacid   | -0.003983791 | 0.011720478 | 0.734452342 |
| pcaec384.pcaac424               | -0.006555832 | 0.019289677 | 0.734480821 |
| c182.c141oh                     | 0.030340774  | 0.089283099 | 0.734507532 |
| pcaac404.pcaac424               | 0.001150685  | 0.003386869 | 0.734565935 |
| pcaac384.acetylorithoine        | 0.012871477  | 0.037887962 | 0.734584107 |
| smc180.smc241                   | 0.012457345  | 0.036670376 | 0.734594117 |
| c102.pcaac343                   | 0.004525825  | 0.013322842 | 0.73459952  |
| pcaac421.c51                    | -0.029936865 | 0.088156194 | 0.734686177 |
| c8.pcaac344                     | -0.015669778 | 0.046156702 | 0.734759864 |
| kynurenine.asparticacid         | 0.012411865  | 0.036571791 | 0.734840496 |
| pcaec401.ornithine              | -0.012856148 | 0.03788573  | 0.734873143 |
| lysopcac180.transhydroxyproline | -0.013524861 | 0.039858886 | 0.734889321 |
| smc260.lysopcac204              | 0.004585708  | 0.013523294 | 0.735055925 |
| smc160.c3                       | -0.005503154 | 0.016230028 | 0.735074391 |
| pcaac321.pcaac383               | 0.002293637  | 0.006767771 | 0.735199538 |
| pcaac402.pcaec425               | -0.001787388 | 0.005274484 | 0.735223187 |
| lysopcac180.pcaac380            | 0.021185022  | 0.062518543 | 0.735234154 |
| smc160.valine                   | 0.017595307  | 0.051930391 | 0.735260442 |
| smohc221.pcaac323               | 0.032682834  | 0.09648801  | 0.735336021 |
| c18.smc241                      | -0.004433915 | 0.013090395 | 0.735342894 |
| pcaec402.alanine                | -0.003312063 | 0.009780117 | 0.735389817 |
| smc241.pcaac344                 | -0.023145241 | 0.068366955 | 0.735471356 |
| smc260.asparticacid             | -0.012825989 | 0.037906244 | 0.735609255 |
| pcaac402.threonine              | -0.006442106 | 0.019041416 | 0.735639418 |
| smohc221.pcaac322               | 0.017638265  | 0.052156775 | 0.735746863 |
| pcaec384.c3                     | -0.004858348 | 0.014366737 | 0.735755426 |
| pcaac321.lysopcac161            | 0.02051624   | 0.060682575 | 0.735812055 |
| pcaac364.c101                   | -0.001052516 | 0.00311374  | 0.735863131 |
| pcaac421.putrescine             | -0.010530387 | 0.031162691 | 0.735943363 |
| pcaec404.pcaac322               | 0.023832921  | 0.07054113  | 0.735986968 |
| pcaac426.pcaec421               | 0.000671724  | 0.001988792 | 0.736064944 |
| c182.c141                       | 0.007838244  | 0.023210424 | 0.736103437 |
| smc161.pcaec343                 | 0.021944991  | 0.064984778 | 0.736110423 |
| lysopcac160.lysopcac204         | 0.018937475  | 0.056084602 | 0.736136929 |
| glutamine.pcaac406              | 0.009955452  | 0.029489121 | 0.736183274 |
| methionine.arginine             | 0.008990483  | 0.026635124 | 0.7362247   |
| histidine.glutamine             | 0.011587379  | 0.034329821 | 0.736233247 |
| lysopcac161.acetylorithoine     | -0.011299843 | 0.033485147 | 0.736287881 |
| kynurenine.smohc241             | 0.017284576  | 0.051220199 | 0.736289466 |
| smc161.glycine                  | -0.014979115 | 0.044399893 | 0.736355622 |
| glutamicacid.threonine          | 0.009317094  | 0.027621327 | 0.736395532 |
| putrescine.histidine            | 0.016635125  | 0.049317902 | 0.736403969 |



|                                    |              |             |             |
|------------------------------------|--------------|-------------|-------------|
| pcaac343.h1                        | 0.000404739  | 0.001200228 | 0.73646827  |
| pcaac401.methioninesulfoxide       | 0.00804934   | 0.023870409 | 0.7364747   |
| acetylorithoine.ornithine          | -0.007619317 | 0.022605362 | 0.736589029 |
| pcaec301.pcaec385                  | 0.014139665  | 0.041953717 | 0.736609992 |
| pcaac401.pcaec403                  | -0.011988621 | 0.035571585 | 0.736611528 |
| pcaec361.asymmetricdimethylarginir | 0.008829568  | 0.026202576 | 0.736652702 |
| pcaac300.prolinr                   | -0.008451652 | 0.025083685 | 0.736679078 |
| smc240.pcaec401                    | -0.009009199 | 0.026741986 | 0.736712777 |
| c162.methioninesulfoxide           | 0.003768698  | 0.011188124 | 0.736746889 |
| asparagine.lysine                  | -0.022236581 | 0.066037594 | 0.736838645 |
| smc261.alphaaminoadipicacid        | -0.001363902 | 0.004051681 | 0.736913789 |
| pcaec423.pcaec385                  | -0.013546974 | 0.040256076 | 0.736993701 |
| smohc141.pcaac363                  | 0.001426087  | 0.004238429 | 0.737034419 |
| smc261.phenylalanine               | -0.0094397   | 0.028059202 | 0.737068282 |
| pcaec381.smohc241                  | -0.015774096 | 0.046894736 | 0.737104711 |
| lysopcac160.pcaac380               | 0.027813658  | 0.082688775 | 0.737109859 |
| glutamicacid.smc180                | -0.004235535 | 0.012593153 | 0.737131876 |
| pcaec301.alphaaminoadipicacid      | -0.00130343  | 0.003876068 | 0.737177029 |
| pcaac383.pcaac405                  | -0.017587407 | 0.052301087 | 0.737180038 |
| pcaec386.lysopcac181               | 0.006170599  | 0.018356299 | 0.737266762 |
| pcaec405.pcaec425                  | -0.001752597 | 0.005214525 | 0.737310352 |
| pcaec362.asymmetricdimethylarginir | 0.005189525  | 0.015449401 | 0.737456707 |
| pcaac424.lysopcac180               | -0.024689495 | 0.073509053 | 0.737482633 |
| pcaec422.pcaac384                  | 0.01126268   | 0.033532857 | 0.737482748 |
| c3.lysopcac181                     | -0.011082132 | 0.03299664  | 0.737492965 |
| pcaac404.smc260                    | -0.006738381 | 0.020067493 | 0.737546027 |
| c142.phenylalanine                 | -0.009178849 | 0.027337834 | 0.737568306 |
| pcaec403.pcaac364                  | 0.011795874  | 0.035151098 | 0.737703763 |
| pcaac240.smc161                    | 0.027449832  | 0.081801981 | 0.7377127   |
| pcaac425.serotonin                 | -0.023757608 | 0.070803132 | 0.737727595 |
| pcaec443.pcaec401                  | -0.025121927 | 0.074875378 | 0.737748718 |
| c162.h1                            | 0.000855022  | 0.002548672 | 0.737778115 |
| pcaec300.pcaac322                  | 0.01882965   | 0.056137655 | 0.737821931 |
| pcaec380.lysine                    | 0.02790957   | 0.083219182 | 0.737855798 |
| pcaec363.pcaec425                  | -0.000789306 | 0.002353836 | 0.737891126 |
| smc261.pcaac426                    | -0.012534702 | 0.037383259 | 0.73790976  |
| pcaac402.pcaec405                  | 0.028945138  | 0.086340156 | 0.737952784 |
| pcaac344.pcaac360                  | -0.011654842 | 0.034767242 | 0.737968254 |
| pcaec386.pcaec380                  | 0.018014657  | 0.053739409 | 0.737970028 |
| smohc161.pcaec405                  | -0.007370022 | 0.021987854 | 0.737997425 |
| c141oh.pcaec401                    | -0.015762884 | 0.047034326 | 0.738035293 |
| lysopcac140.pcaac383               | -0.003301299 | 0.009853754 | 0.738115234 |
| c182.pcaac361                      | -0.016783088 | 0.050097514 | 0.738131138 |
| pcaec443.pcaec446                  | 0.02065674   | 0.061670667 | 0.738173269 |
| smc180.smohc161                    | 0.006135658  | 0.018320059 | 0.738201646 |

|                                    |              |             |             |
|------------------------------------|--------------|-------------|-------------|
| pcaec363.isoleucine                | 0.0051011    | 0.015232046 | 0.738218284 |
| c5.pcaac405                        | 0.039236786  | 0.117188765 | 0.738275243 |
| pcaac420.alphaaminoadipicacid      | -0.000965896 | 0.002886469 | 0.738416857 |
| smc202.ornithine                   | 0.008021942  | 0.023973577 | 0.738426523 |
| pcaec322.asymmetricdimethylarginir | -0.012807927 | 0.038308554 | 0.738637331 |
| leucine.alphaaminoadipicacid       | -0.001134281 | 0.003393916 | 0.738732176 |
| pcaac406.pcaac322                  | 0.016492789  | 0.049350643 | 0.73874268  |
| pcaec381.smohc141                  | -0.01039588  | 0.031110131 | 0.738766929 |
| c2.pcaec301                        | -0.017265893 | 0.051672457 | 0.738784022 |
| pcaec406.pcaec444                  | 0.036720205  | 0.109913083 | 0.73882701  |
| pcaec403.lysopcac281               | 0.004990274  | 0.01493933  | 0.738863196 |
| pcaec443.pcaec425                  | -0.001484727 | 0.004445426 | 0.738897893 |
| c16.c10                            | 0.011499065  | 0.034436068 | 0.738946734 |
| lysopcac161.pcaec444               | 0.036060484  | 0.108024358 | 0.73902725  |
| smc260.smohc241                    | 0.014146841  | 0.042382642 | 0.739049477 |
| pcaec444.lysopcac140               | -0.000383099 | 0.001147789 | 0.739062511 |
| c162.lysopcac161                   | -0.024527745 | 0.07351033  | 0.739143327 |
| h1.lysopcac281                     | -0.003615524 | 0.010836215 | 0.739152404 |
| pcaac320.smc181                    | 0.003250406  | 0.009742838 | 0.739176392 |
| pcaec321.pcaec322                  | -0.041675216 | 0.12492874  | 0.739197563 |
| lysopcac170.glutamicacid           | -0.010132279 | 0.030383828 | 0.739284811 |
| pcaac240.pcaac344                  | 0.02059931   | 0.061781716 | 0.739326399 |
| methionine.smc161                  | 0.011571186  | 0.034706131 | 0.739338576 |
| pcaec340.lysopcac203               | 0.003092277  | 0.009275112 | 0.739345754 |
| c141.pcaec420                      | 0.005232336  | 0.015695193 | 0.739363255 |
| pcaec444.pcaac383                  | 0.001033677  | 0.003101265 | 0.739411253 |
| pcaac384.pcaac383                  | -0.000906062 | 0.00271853  | 0.739424089 |
| acetylmornithoine.smc202           | -0.0149982   | 0.045002987 | 0.739439066 |
| pcaec361.c182                      | 0.010068518  | 0.030215329 | 0.7394735   |
| lysopcac203.pcaac240               | -0.003832519 | 0.011502048 | 0.739490308 |
| smc202.pcaec363                    | -0.005373928 | 0.016128422 | 0.739495586 |
| glutamicacid.lysopcac280           | -0.002245218 | 0.006738461 | 0.739496889 |
| pcaac425.pcaec343                  | 0.018943611  | 0.056855301 | 0.739500312 |
| lysopcac180.pcaac360               | -0.007985578 | 0.023967955 | 0.739509819 |
| pcaac380.lysopcac181               | 0.00691193   | 0.020747821 | 0.739537861 |
| pcaac380.c3                        | 0.007534408  | 0.022621796 | 0.739598375 |
| pcaac426.lysopcac160               | -0.019687835 | 0.059120991 | 0.739636383 |
| c182.creatinine                    | 0.00434396   | 0.013046167 | 0.739667233 |
| smc161.c4                          | -0.005312584 | 0.015957679 | 0.739705787 |
| c141oh.pcaac364                    | 0.009700705  | 0.02913898  | 0.739709912 |
| pcaac341.lysopcac182               | -0.004450145 | 0.013368106 | 0.739724124 |
| spermidine.h1                      | 0.002907515  | 0.008736019 | 0.739779482 |
| glycine.pcaac342                   | 0.001856534  | 0.005578209 | 0.739779612 |
| pcaec362.c162                      | -0.024743977 | 0.074355437 | 0.739809295 |
| methioninesulfoxide.pcaac366       | -0.007261958 | 0.021822706 | 0.739816    |

|                              |              |             |             |
|------------------------------|--------------|-------------|-------------|
| arginine.pcaac420            | 0.021851913  | 0.065668582 | 0.739823699 |
| pcaac422.c14                 | -0.0129844   | 0.039030686 | 0.739890698 |
| c3.smc180                    | -0.004289099 | 0.012893188 | 0.739896432 |
| pcaec403.c102                | -0.010807655 | 0.032493018 | 0.739933576 |
| pcaac426.pcaec446            | -0.020567195 | 0.061867811 | 0.740066865 |
| alanine.pcaac344             | 0.015482391  | 0.046578033 | 0.740097678 |
| pcaac380.c51                 | -0.015093554 | 0.045419472 | 0.740159612 |
| c0.pcaac341                  | -0.000961975 | 0.002896264 | 0.740288605 |
| h1.pcaac404                  | -0.002255795 | 0.006794095 | 0.74037943  |
| pcaec404.threonine           | -0.008574677 | 0.025827269 | 0.740395961 |
| pcaec340.methioninesulfoxide | 0.004151318  | 0.012509346 | 0.740504173 |
| c0.pcaac403                  | -0.001778569 | 0.005361015 | 0.740577672 |
| putrescine.pcaac420          | -0.020937541 | 0.063111889 | 0.740582964 |
| creatinine.pcaac364          | -0.016434235 | 0.049563207 | 0.740712087 |
| c10.pcaac366                 | 0.003502492  | 0.010563019 | 0.740712703 |
| pcaec446.pcaec425            | -0.003358199 | 0.0101347   | 0.740881529 |
| lysopcac170.pcaec425         | 0.00451316   | 0.013624827 | 0.740965299 |
| c8.threonine                 | 0.006504606  | 0.019640032 | 0.741006088 |
| pcaec364.pcaec446            | -0.016754564 | 0.050599187 | 0.741057374 |
| smohc141.pcaec363            | -0.020569821 | 0.062122132 | 0.741060483 |
| pcaac422.pcaec363            | 0.00677591   | 0.020467957 | 0.74111279  |
| pcaac320.methioninesulfoxide | 0.004633575  | 0.01399701  | 0.741119809 |
| pcaac385.pcaec445            | 0.013403858  | 0.04049928  | 0.741176336 |
| pcaac360.pcaec425            | -0.001043281 | 0.00315228  | 0.741179835 |
| pcaac341.pcaac320            | 0.043181985  | 0.130506075 | 0.741239873 |
| pcaac424.smc161              | 0.027927071  | 0.084426209 | 0.741310944 |
| c14.pcaac342                 | 0.000919098  | 0.002779492 | 0.741398069 |
| pcaec402.c12                 | 0.012673015  | 0.03833056  | 0.741433378 |
| pcaec342.pcaac426            | -0.00982702  | 0.02974145  | 0.741591184 |
| pcaac421.pcaec424            | 0.014331344  | 0.043375761 | 0.74160259  |
| pcaec380.pcaac425            | -0.034255296 | 0.103690706 | 0.741632373 |
| pcaec364.lysopcac182         | 0.007642384  | 0.023133699 | 0.741634746 |
| glycine.kynurenine           | -0.003513341 | 0.010635353 | 0.741643543 |
| lysopcac280.glycine          | 0.006232125  | 0.01886548  | 0.741643609 |
| pcaec420.pcaac366            | 0.00632728   | 0.019154636 | 0.741658019 |
| c16.smc261                   | 0.004077752  | 0.012346969 | 0.741705451 |
| asparagine.lysopcac182       | -0.007848607 | 0.023765913 | 0.741718277 |
| creatinine.pcaac422          | -0.006605235 | 0.020004558 | 0.741763423 |
| pcaec361.pcaec421            | 0.000763939  | 0.00231367  | 0.741764677 |
| smohc222.c51                 | -0.009084465 | 0.027514705 | 0.741777632 |
| pcaac422.pcaac383            | 0.003121105  | 0.009454709 | 0.741820181 |
| pcaec381.c0                  | 0.000326754  | 0.000989886 | 0.741834283 |
| lysine.smc160                | -0.019391115 | 0.05874823  | 0.741850134 |
| pcaac362.pcaac360            | -0.007124063 | 0.021592836 | 0.741958947 |
| smc240.glutamicacid          | -0.006789083 | 0.020578186 | 0.741966994 |

|                                    |              |             |             |
|------------------------------------|--------------|-------------|-------------|
| pcaac341.pcaec341                  | 0.030557331  | 0.092632961 | 0.741997999 |
| pcaac320.pcaec422                  | 0.006567912  | 0.019913608 | 0.742039518 |
| smc260.pcaac323                    | 0.019967562  | 0.060556835 | 0.742105649 |
| c12.lysopcac182                    | -0.010201669 | 0.030941004 | 0.74211999  |
| lysine.pcaac422                    | 0.007631413  | 0.023148038 | 0.742146338 |
| smc261.pcaec362                    | 0.005453354  | 0.016549395 | 0.742266045 |
| c141oh.pcaac380                    | 0.016500581  | 0.050076483 | 0.742275305 |
| c8.c12                             | 0.027653808  | 0.083940237 | 0.742321447 |
| pcaac405.pcaec422                  | 0.003752826  | 0.011391846 | 0.742333104 |
| pcaac422.alanine                   | -0.004907564 | 0.014897731 | 0.742343716 |
| pcaec403.pcaac344                  | 0.024492711  | 0.074358496 | 0.742366352 |
| pcaec425.lysopcac161               | 0.018822157  | 0.057146981 | 0.742383602 |
| pcaac424.lysine                    | -0.026275299 | 0.079778934 | 0.742393121 |
| pcaac420.pcaec402                  | -0.016073656 | 0.048810095 | 0.742424242 |
| lysopcac180.methionine             | -0.008101654 | 0.024604307 | 0.742448529 |
| pcaac322.pcaec444                  | -0.02282894  | 0.069342278 | 0.742491358 |
| pcaec445.h1                        | -0.001950231 | 0.005923808 | 0.742492844 |
| pcaec406.putrescine                | 0.012270477  | 0.037273955 | 0.742509466 |
| pcaec382.histidine                 | -0.02276401  | 0.069150765 | 0.742511859 |
| lysopcac161.pcaac384               | 0.018447533  | 0.056041747 | 0.742526235 |
| asymmetricdimethylarginine.pcaec38 | -0.013681757 | 0.041564402 | 0.742529825 |
| pcaec446.c51                       | -0.013433527 | 0.040818678 | 0.742580812 |
| c142.lysopcac182                   | 0.011298013  | 0.034343144 | 0.742677457 |
| pcaec402.pcaac363                  | 0.002450411  | 0.007451865 | 0.74278481  |
| lysopcac140.pcaac342               | -0.000624095 | 0.001898207 | 0.74282294  |
| pcaec322.pcaac385                  | -0.006145794 | 0.018694805 | 0.742851612 |
| pcaac421.pcaac361                  | -0.017951643 | 0.054631131 | 0.742961807 |
| pcaac402.lysopcac203               | 0.006408195  | 0.019508106 | 0.743043642 |
| c101.pcaec423                      | -0.003670042 | 0.011174054 | 0.743078092 |
| smc261.pcaac383                    | -0.001250201 | 0.003807073 | 0.743118838 |
| lysopcac170.pcaec405               | -0.010155959 | 0.030930246 | 0.743148066 |
| c142.pcaac363                      | 0.001983951  | 0.006043421 | 0.743199101 |
| c142.c141                          | -0.014503949 | 0.044181529 | 0.743200552 |
| pcaac421.methioninesulfoxide       | 0.005828086  | 0.017755531 | 0.74323092  |
| pcaec343.pcaec386                  | 0.002803202  | 0.008541179 | 0.743262643 |
| c141.alanine                       | -0.006276804 | 0.019129455 | 0.74332002  |
| pcaec360.pcaec420                  | 0.006336782  | 0.019315239 | 0.743358367 |
| asparagine.pcaac404                | -0.002164823 | 0.006598917 | 0.743369162 |
| lysopcac281.c142                   | 0.011539529  | 0.035190482 | 0.743475623 |
| pcaac342.pcaec402                  | -0.006766335 | 0.020640008 | 0.743543558 |
| pcaac365.pcaec425                  | -0.001133282 | 0.003457205 | 0.743561201 |
| pcaec443.pcaac344                  | 0.015713049  | 0.047941178 | 0.743595861 |
| c5.pcaac363                        | -0.005141007 | 0.015686634 | 0.743614837 |
| pcaac362.c51                       | -0.019179973 | 0.058524817 | 0.743620816 |
| pcaec421.pcaec365                  | -0.006340854 | 0.019348216 | 0.743621441 |

|                               |              |             |             |
|-------------------------------|--------------|-------------|-------------|
| pcaec444.lysopcac281          | 0.003248761  | 0.009915862 | 0.743689465 |
| kynurenine.pcaac360           | 0.008347153  | 0.02549214  | 0.743834744 |
| histidine.smohc241            | -0.026571265 | 0.081190811 | 0.743963695 |
| c0.pcaac281                   | -0.000360786 | 0.001102579 | 0.744000724 |
| lysopcac281.pcaac363          | 0.002427759  | 0.00741963  | 0.744010348 |
| c141oh.pcaec446               | -0.007164225 | 0.021896931 | 0.744031594 |
| pcaac366.pcaac321             | 0.005783905  | 0.017680314 | 0.744062729 |
| pcaac385.pcaac420             | -0.017494953 | 0.053488772 | 0.744108777 |
| pcaac361.pcaec425             | -0.000729858 | 0.002232653 | 0.744241259 |
| alphaaminoadipicacid.tyrosine | -0.01764845  | 0.053988448 | 0.744247659 |
| smohc141.c18                  | -0.008121266 | 0.024843944 | 0.744249112 |
| pcaec301.putrescine           | -0.008625088 | 0.026397773 | 0.744366632 |
| pcaac362.methionine           | -0.009420557 | 0.028843319 | 0.744460255 |
| c182.pcaac363                 | 0.002443975  | 0.007483409 | 0.744479592 |
| methioninesulfoxide.smc160    | -0.009362438 | 0.02866963  | 0.744496863 |
| smohc221.glutamicacid         | 0.006682382  | 0.020465248 | 0.744526679 |
| smohc141.pcaec446             | -0.006953894 | 0.021297538 | 0.744535559 |
| pcaec384.pcaac363             | 0.00172983   | 0.005297995 | 0.744539391 |
| pcaac380.glutamicacid         | 0.011905353  | 0.036465668 | 0.744558585 |
| histidine.pcaec405            | 0.012819566  | 0.039267775 | 0.744570542 |
| kynurenine.smc241             | 0.002596497  | 0.007955468 | 0.744635703 |
| c16.pcaac323                  | 0.031495038  | 0.096528162 | 0.744711741 |
| pcaac385.tyrosine             | 0.016654115  | 0.051046853 | 0.74473188  |
| c14.pcaac360                  | -0.007661373 | 0.023483057 | 0.744732239 |
| pcaec321.putrescine           | 0.009821187  | 0.030104762 | 0.744745373 |
| pcaec386.serotonin            | 0.028479207  | 0.087316485 | 0.744800458 |
| glutamine.c102                | 0.010651067  | 0.032657929 | 0.744815872 |
| ornithine.pcaac420            | 0.026756531  | 0.082076961 | 0.744926914 |
| c10.prolinr                   | -0.013236712 | 0.040609402 | 0.744958095 |
| smohc241.pcaac386             | 0.005442756  | 0.016698776 | 0.744969003 |
| pcaec425.asparagine           | 0.004590148  | 0.014082926 | 0.744969272 |
| pcaec403.pcaac386             | -0.003172064 | 0.009735024 | 0.745042327 |
| pcaac323.smc181               | -0.004999855 | 0.015345554 | 0.745059322 |
| isoleucine.ornithine          | -0.011362792 | 0.034877383 | 0.745078392 |
| pcaac281.c182                 | 0.010222378  | 0.031378838 | 0.745093172 |
| pcaac385.pcaec382             | 0.001709279  | 0.005249545 | 0.745219929 |
| glutamine.c51                 | 0.012419105  | 0.038151498 | 0.745283605 |
| pcaac360.lysopcac170          | -0.015691448 | 0.048206983 | 0.745298111 |
| c18.pcaac424                  | 0.002192043  | 0.006734475 | 0.745302502 |
| pcaec444.pcaac386             | -0.008657682 | 0.026606438 | 0.745376297 |
| asparagine.pcaac403           | -0.000555537 | 0.001707433 | 0.745402101 |
| pcaec386.pcaec341             | 0.022123187  | 0.068010562 | 0.745457507 |
| smc240.smc160                 | -0.022032413 | 0.067734919 | 0.745469874 |
| pcaac424.pcaac342             | -0.001816619 | 0.005585948 | 0.745516602 |
| pcaec384.valine               | -0.018465263 | 0.056787807 | 0.745554152 |

|                                |              |             |             |
|--------------------------------|--------------|-------------|-------------|
| pcaac281.pcaac385              | -0.016607369 | 0.051074459 | 0.745556045 |
| pcaac420.pcaac360              | -0.011765653 | 0.036187067 | 0.745575492 |
| c8.c142                        | 0.016848044  | 0.051826256 | 0.745611109 |
| c102.smc160                    | -0.02505167  | 0.077068783 | 0.745634554 |
| pcaac360.asparagine            | -0.002426932 | 0.007468712 | 0.74571726  |
| c3.pcaac383                    | -0.001451982 | 0.004468924 | 0.745747461 |
| pcaac366.lysopcac160           | 0.004806978  | 0.014796052 | 0.745765592 |
| pcaec424.pcaec423              | 0.013463465  | 0.041445278 | 0.745790741 |
| arginine.ornithine             | 0.008620303  | 0.026542491 | 0.745847757 |
| c181.pcaac322                  | -0.01821733  | 0.056103216 | 0.745895112 |
| pcaec446.pcaac425              | -0.022195736 | 0.068360923 | 0.745915067 |
| pcaac403.transhydroxyproline   | -0.017539202 | 0.054020733 | 0.745922    |
| c142.pcaec405                  | -0.009228262 | 0.028423762 | 0.745928228 |
| smc241.pcaec340                | 0.018082896  | 0.055728214 | 0.746066787 |
| pcaac364.methioninesulfoxide   | 0.003588273  | 0.011058861 | 0.746076815 |
| pcaac421.alphaaminoadipicacid  | -0.001573585 | 0.004851069 | 0.74614583  |
| smohc241.pcaac300              | 0.016914428  | 0.052150329 | 0.746175453 |
| c141oh.pcaac425                | 0.01421498   | 0.043828081 | 0.746179115 |
| pcaec423.pcaec386              | -0.002922406 | 0.009011675 | 0.746212256 |
| pcaac426.pcaac364              | -0.019495462 | 0.060129956 | 0.746264356 |
| pcaec420.acetylmithoine        | -0.02136017  | 0.065909692 | 0.746369919 |
| pcaac322.pcaac342              | -0.000945761 | 0.002918404 | 0.746380905 |
| putrescine.methioninesulfoxide | -0.005427556 | 0.016751254 | 0.746425409 |
| pcaac381.pcaec365              | -0.00548672  | 0.016933949 | 0.746426795 |
| smc181.pcaec342                | 0.024319311  | 0.075078742 | 0.746494551 |
| c5.c10                         | -0.011779357 | 0.036366711 | 0.746503959 |
| pcaac360.pcaec386              | 0.003734991  | 0.011532737 | 0.746537971 |
| pcaac320.pcaec445              | 0.013885125  | 0.042881255 | 0.746580162 |
| c51dc.pcaac424                 | 0.002837609  | 0.00876374  | 0.746591024 |
| pcaec425.pcaec322              | 0.015641163  | 0.048332286 | 0.746721284 |
| pcaac421.spermidine            | 0.016824503  | 0.051993204 | 0.746741582 |
| c12.c182                       | -0.016884532 | 0.052191274 | 0.74680041  |
| lysopcac280.kynurenine         | -0.009262013 | 0.028644079 | 0.746924548 |
| pcaec421.asparagine            | 0.005546664  | 0.017154086 | 0.746928055 |
| pcaac426.pcaac342              | -0.001064572 | 0.00329279  | 0.746958015 |
| pcaac401.smc160                | -0.018216289 | 0.056353392 | 0.746998046 |
| pcaac402.pcaec445              | 0.021340963  | 0.066050654 | 0.747112177 |
| pcaec341.pcaec420              | 0.007050867  | 0.021829513 | 0.747189985 |
| pcaac364.pcaac362              | 0.001864429  | 0.005772356 | 0.747193212 |
| c142.tyrosine                  | 0.015621734  | 0.048365969 | 0.747195112 |
| methioninesulfoxide.pcaac381   | 0.015414754  | 0.047727262 | 0.74720593  |
| pcaac366.smc260                | -0.006872374 | 0.021280035 | 0.747225954 |
| pcaac360.methionine            | -0.012743261 | 0.039460064 | 0.747232506 |
| c10.pcaac380                   | 0.013371486  | 0.041407    | 0.747242002 |
| pcaac386.asparagine            | -0.003222648 | 0.009980316 | 0.747262984 |

|                                   |              |             |             |
|-----------------------------------|--------------|-------------|-------------|
| smc161.pcaac383                   | -0.000784715 | 0.002430257 | 0.747267992 |
| lysopcac180.taurine               | -0.007468269 | 0.023132082 | 0.747298573 |
| c102.pcaec444                     | 0.034613807  | 0.107235582 | 0.7473518   |
| alphaaminoadipicacid.pcaec362     | 0.003872277  | 0.011997865 | 0.747378798 |
| pcaec385.c101                     | -0.002866765 | 0.00888426  | 0.747430228 |
| c101.lysopcac281                  | -0.002312736 | 0.007168554 | 0.747473116 |
| pcaac380.pcaec421                 | -0.000507472 | 0.001573525 | 0.747560881 |
| c14.asparagine                    | -0.003739959 | 0.011596765 | 0.747565424 |
| ornithine.lysopcac161             | -0.024971837 | 0.077464916 | 0.747668986 |
| pcaec405.c2                       | 0.021373899  | 0.066313742 | 0.74770557  |
| smohc141.lysopcac204              | -0.006690544 | 0.020761674 | 0.747751102 |
| pcaac385.threonine                | 0.008263524  | 0.025646535 | 0.747786139 |
| h1.pcaac360                       | 0.011014331  | 0.034187453 | 0.747811475 |
| pcaec322.putrescine               | 0.007586101  | 0.023557826 | 0.747928069 |
| pcaec424.smohc141                 | -0.006451476 | 0.020034898 | 0.747934481 |
| methioninesulfoxide.pcaec423      | 0.010230791  | 0.031773916 | 0.747953264 |
| alanine.glutamicacid              | 0.013676376  | 0.042478575 | 0.74797421  |
| asparagine.smohc141               | -0.005266845 | 0.016364573 | 0.748061166 |
| pcaec445.pcaec343                 | -0.019281978 | 0.059921447 | 0.748104074 |
| pcaec365.pcaec386                 | 0.002488315  | 0.007733114 | 0.748114332 |
| c2.c182                           | -0.007897448 | 0.024544214 | 0.748121802 |
| smohc221.pcaec383                 | -0.014999586 | 0.046620496 | 0.748141543 |
| smc202.asparticacid               | 0.008936028  | 0.027775627 | 0.748153708 |
| methioninesulfoxide.lysopcac203   | 0.001993666  | 0.006201009 | 0.748316417 |
| prolinr.pcaec343                  | 0.024213836  | 0.075342099 | 0.74840829  |
| c162.pcaac341                     | 0.001612648  | 0.005018619 | 0.748447785 |
| smc160.pcaec340                   | 0.022725898  | 0.070731079 | 0.748472685 |
| smohc221.pcaec402                 | -0.020755391 | 0.064598857 | 0.748475306 |
| pcaac406.acetylmithoine           | -0.006996607 | 0.021779355 | 0.74851088  |
| smc181.asymmetricdimethylarginine | 0.004078433  | 0.012697212 | 0.748543074 |
| lysopcac204.methioninesulfoxide   | 0.01050485   | 0.032715235 | 0.74862421  |
| c51.pcaec425                      | -0.001574618 | 0.00490427  | 0.748645908 |
| methionine.pcaec421               | 0.001167164  | 0.003636051 | 0.748701319 |
| pcaec380.pcaec425                 | -0.000954045 | 0.002972824 | 0.748758321 |
| pcaec445.pcaec420                 | 0.00753365   | 0.023480589 | 0.748816106 |
| smc240.pcaec343                   | 0.01817606   | 0.05666136  | 0.748862854 |
| asparagine.spermidine             | -0.01641753  | 0.051188567 | 0.748906368 |
| serine.ornithine                  | 0.012140066  | 0.03787164  | 0.749033626 |
| pcaec386.pcaac425                 | -0.028587181 | 0.089277649 | 0.749300514 |
| pcaec362.smc180                   | 0.002223467  | 0.006944583 | 0.749325118 |
| c8.c51                            | -0.022077846 | 0.068963146 | 0.749350109 |
| lysopcac203.pcaec385              | 0.017257493  | 0.053918037 | 0.749403631 |
| lysopcac204.pcaac384              | 0.012666153  | 0.039578124 | 0.7494338   |
| c10.alanine                       | 0.00891745   | 0.027868741 | 0.749470696 |
| smc261.pcaac366                   | -0.005951626 | 0.018602448 | 0.749502886 |

|                               |              |             |             |
|-------------------------------|--------------|-------------|-------------|
| isoleucine.pcaec343           | 0.021701702  | 0.067845044 | 0.749552972 |
| glycine.lysopcac281           | 0.002359837  | 0.007378303 | 0.74958086  |
| smohc161.alphaaminoadipicacid | -0.002124232 | 0.006641836 | 0.749587493 |
| pcaec364.pcaec422             | 0.011051322  | 0.034555125 | 0.749594151 |
| pcaec420.pcaec342             | -0.022851057 | 0.071477843 | 0.7496871   |
| pcaec365.pcaec426             | 0.013750221  | 0.043012977 | 0.749700839 |
| c101.pcaec420                 | -0.018207689 | 0.056960254 | 0.749716024 |
| glutamine.pcaec300            | 0.022036882  | 0.068974774 | 0.749840193 |
| pcaec423.kynurenine           | -0.001929759 | 0.00604181  | 0.749909037 |
| pcaec421.c18                  | -0.014115984 | 0.044203511 | 0.749954515 |
| c141oh.pcaec420               | 0.005875438  | 0.018400658 | 0.749980938 |
| pcaec342.methioninesulfoxide  | 0.003135101  | 0.00981892  | 0.749991572 |
| pcaec384.pcaec362             | 0.00146343   | 0.004585606 | 0.750109802 |
| pcaec420.pcaec425             | -0.000665398 | 0.002085465 | 0.750163388 |
| spermidine.c10                | -0.006575047 | 0.020615355 | 0.750258302 |
| pcaec403.c8                   | 0.014877202  | 0.046652288 | 0.750291475 |
| pcaec443.serine               | 0.017680028  | 0.055449772 | 0.750327672 |
| pcaec342.valine               | 0.011978039  | 0.037576997 | 0.750394072 |
| c102.lysopcac161              | -0.013562937 | 0.04256691  | 0.75049514  |
| pcaec322.pcaec321             | -0.009190698 | 0.028848011 | 0.750522347 |
| pcaec363.pcaec342             | 0.033058405  | 0.103778761 | 0.750555217 |
| pcaec404.c3                   | -0.009053324 | 0.028421661 | 0.750563431 |
| pcaec382.pcaec365             | -0.005101183 | 0.016016298 | 0.750591106 |
| c182.methioninesulfoxide      | 0.003030843  | 0.009518786 | 0.750661475 |
| serine.pcaec384               | -0.005665747 | 0.017795393 | 0.750679409 |
| smc180.phenylalanine          | -0.011829372 | 0.03716028  | 0.750716531 |
| c10.pcaec405                  | -0.002969073 | 0.009329712 | 0.750788633 |
| pcaec322.pcaec401             | -0.007408199 | 0.023282127 | 0.750823417 |
| pcaec401.alanine              | -0.003580715 | 0.011254602 | 0.750851379 |
| pcaec422.c102                 | -0.009461162 | 0.029744249 | 0.750905771 |
| pcaec403.pcaec424             | 0.006392021  | 0.020100031 | 0.750961196 |
| c101.pcaec363                 | 0.003620474  | 0.0113863   | 0.750993692 |
| lysine.glutamicacid           | 0.01049339   | 0.033004147 | 0.751013392 |
| pcaec383.smc240               | 0.01240607   | 0.03902628  | 0.751052297 |
| pcaec426.smc202               | -0.009880904 | 0.031094198 | 0.751140782 |
| alphaaminoadipicacid.pcaec403 | -0.010214715 | 0.032145796 | 0.751149228 |
| pcaec446.pcaec383             | -0.015114268 | 0.047575783 | 0.751205114 |
| smohc241.phenylalanine        | -0.015574318 | 0.049025068 | 0.751210836 |
| c4.pcaec385                   | -0.024969289 | 0.078606724 | 0.75123539  |
| pcaec300.lysopcac203          | 0.003941972  | 0.012410077 | 0.751239516 |
| pcaec426.lysopcac170          | 0.004556833  | 0.014348111 | 0.751278624 |
| pcaec406.pcaec301             | 0.020972576  | 0.0660391   | 0.751288453 |
| c3.c102                       | -0.005360309 | 0.016878847 | 0.751290439 |
| pcaec420.pcaec322             | 0.01480848   | 0.046639608 | 0.75134105  |
| smohc161.pcaec363             | 0.001341302  | 0.004226232 | 0.751442012 |



|                                    |              |             |             |
|------------------------------------|--------------|-------------|-------------|
| pcaec383.c141                      | -0.010050224 | 0.031667886 | 0.75145113  |
| pcaac403.pcaac420                  | 0.036242807  | 0.11423162  | 0.751518155 |
| serotonin.pcaac322                 | 0.016951374  | 0.053441904 | 0.751580378 |
| pcaac401.pcaac320                  | -0.019078652 | 0.060156085 | 0.751610708 |
| smc261.pcaec384                    | -0.017176825 | 0.05417937  | 0.751698704 |
| smohc222.c12                       | 0.013725395  | 0.043301333 | 0.75174588  |
| smohc141.pcaec386                  | 0.005302369  | 0.016729047 | 0.751759621 |
| pcaec365.pcaec421                  | 0.000232137  | 0.000732606 | 0.751828162 |
| acetylorlithoine.smohc141          | 0.006066172  | 0.019145029 | 0.751836979 |
| lysopcac280.c3                     | -0.010777991 | 0.034017462 | 0.751849567 |
| smc161.ornithine                   | -0.011678836 | 0.03686581  | 0.751882774 |
| lysopcac180.pcaac342               | -0.001354826 | 0.004278759 | 0.751998695 |
| c0.methionine                      | -0.007703217 | 0.024337404 | 0.752091442 |
| phenylalanine.c4                   | 0.004663964  | 0.014739727 | 0.752164346 |
| lysopcac281.alphaaminoadipicacid   | -0.000734987 | 0.002322957 | 0.752179351 |
| pcaac383.pcaac321                  | -0.007905155 | 0.02498492  | 0.752182721 |
| lysopcac181.smc161                 | -0.023631991 | 0.074691848 | 0.752185659 |
| pcaac383.serotonin                 | 0.021262267  | 0.067206222 | 0.752200567 |
| asymmetricdimethylarginine.lysopca | -0.002906307 | 0.009188411 | 0.752255152 |
| pcaac402.smohc222                  | -0.006254507 | 0.019774847 | 0.752266827 |
| smc260.taurine                     | 0.012295142  | 0.038873949 | 0.752269615 |
| pcaac343.pcaac321                  | -0.008900158 | 0.02814246  | 0.752291254 |
| c101.pcaec362                      | 0.002841497  | 0.008987208 | 0.752353698 |
| pcaac361.threonine                 | 0.00751516   | 0.023772765 | 0.752388931 |
| smc180.pcaec420                    | 0.004161001  | 0.013162825 | 0.752394342 |
| smohc241.c8                        | -0.011264768 | 0.035636978 | 0.752409404 |
| pcaac386.lysopcac204               | -0.010481718 | 0.033161927 | 0.752425211 |
| asparticacid.c142                  | 0.010115621  | 0.032007675 | 0.752455138 |
| pcaac426.transhydroxyproline       | 0.007023659  | 0.022224256 | 0.752456354 |
| methionine.acetylorlithoine        | 0.008372656  | 0.026494206 | 0.752469509 |
| c142.pcaac344                      | -0.011071581 | 0.03503786  | 0.752491686 |
| pcaec301.c182                      | 0.010705895  | 0.03388091  | 0.752493976 |
| pcaac365.pcaac366                  | -0.032541659 | 0.102988762 | 0.752503937 |
| pcaac406.taurine                   | 0.010893661  | 0.034504419 | 0.752697115 |
| pcaec420.lysopcac281               | 0.001356226  | 0.004296153 | 0.752722809 |
| smohc141.pcaac406                  | -0.009231981 | 0.029249889 | 0.752767839 |
| pcaac405.smohc141                  | -0.003322252 | 0.010530048 | 0.752860605 |
| pcaac404.acetylorlithoine          | 0.001728452  | 0.005479268 | 0.752897693 |
| spermidine.c2                      | -0.073121894 | 0.231838929 | 0.752938235 |
| pcaac343.pcaac403                  | -0.004546754 | 0.01441854  | 0.752982755 |
| pcaac321.pcaac344                  | -0.021993216 | 0.069759653 | 0.753035395 |
| arginine.c4                        | -0.012632372 | 0.040078495 | 0.753096383 |
| c14.threonine                      | 0.005718456  | 0.018147386 | 0.753156196 |
| pcaec343.pcaec421                  | 0.000651241  | 0.002066769 | 0.753164417 |
| c5.smc160                          | -0.035913851 | 0.113995466 | 0.753205836 |

|                                    |              |             |             |
|------------------------------------|--------------|-------------|-------------|
| pcaec360.pcaec363                  | -0.008143523 | 0.025852335 | 0.753239809 |
| smohc241.pcaec361                  | 0.014692149  | 0.046641894 | 0.753241704 |
| pcaec301.phenylalanine             | 0.005464987  | 0.01734971  | 0.753248411 |
| c12.valine                         | -0.013369962 | 0.04244786  | 0.753260811 |
| c0.pcaec342                        | 0.008519752  | 0.027056144 | 0.753323061 |
| pcaac363.alanine                   | -0.005789675 | 0.018386752 | 0.75332958  |
| pcaac383.pcaec300                  | 0.00537516   | 0.017074022 | 0.753381012 |
| c51dc.pcaec365                     | -0.006400055 | 0.020330014 | 0.753386223 |
| pcaac300.isoleucine                | -0.007178108 | 0.022805313 | 0.75342582  |
| creatinine.taurine                 | 0.012041943  | 0.038266423 | 0.753478118 |
| pcaac366.pcaec380                  | -0.029867065 | 0.094930106 | 0.753527598 |
| pcaac300.pcaac384                  | -0.023058235 | 0.073297446 | 0.753555794 |
| pcaec361.leucine                   | -0.017224783 | 0.054762069 | 0.753590539 |
| c182.pcaec360                      | 0.005916802  | 0.018824537 | 0.753761261 |
| pcaec405.transhydroxyproline       | -0.022231681 | 0.070738316 | 0.75378601  |
| ornithine.smc260                   | 0.006149036  | 0.019567268 | 0.753808354 |
| pcaac404.c141oh                    | 0.033357856  | 0.106154824 | 0.75381847  |
| putrescine.smohc141                | 0.002266981  | 0.007220416 | 0.754022779 |
| pcaec342.pcaac361                  | 0.023518634  | 0.074929135 | 0.754090848 |
| alanine.pcaac402                   | 0.013986143  | 0.044561667 | 0.754104459 |
| smohc222.taurine                   | 0.007063596  | 0.02251725  | 0.754228215 |
| pcaac403.lysopcac180               | -0.018633242 | 0.059408275 | 0.75426602  |
| smohc241.threonine                 | 0.006151583  | 0.019613343 | 0.754269406 |
| c4.taurine                         | -0.021153571 | 0.067453726 | 0.754300896 |
| pcaec342.pcaec406                  | 0.001487283  | 0.004742942 | 0.754318359 |
| c0.smc260                          | 0.007874165  | 0.025114368 | 0.754353159 |
| pcaac341.pcaec425                  | -0.000917409 | 0.002926666 | 0.754403592 |
| pcaac402.glycine                   | -0.004367433 | 0.013933902 | 0.754423587 |
| c162.pcaec342                      | 0.015005511  | 0.047882114 | 0.754465192 |
| pcaac362.ornithine                 | 0.009303723  | 0.029687907 | 0.754465345 |
| h1.pcaec340                        | -0.021015485 | 0.067063409 | 0.754478143 |
| lysopcac180.smc241                 | 0.009750851  | 0.031119684 | 0.754503555 |
| pcaac321.pcaac380                  | -0.011888131 | 0.037942813 | 0.754516277 |
| serotonin.c51dc                    | 0.028643584  | 0.091428489 | 0.754537194 |
| c101.c2                            | -0.013449457 | 0.042945266 | 0.754622693 |
| pcaac320.c4                        | -0.004109497 | 0.013122457 | 0.754631387 |
| pcaec385.pcaec363                  | 0.00961351   | 0.030701899 | 0.754662436 |
| pcaec361.smc180                    | 0.001021248  | 0.003262198 | 0.754714783 |
| pcaec341.methioninesulfoxide       | 0.004040838  | 0.012908547 | 0.754729484 |
| lysopcac180.smc181                 | -0.00314976  | 0.010062895 | 0.754751047 |
| pcaec341.asymmetricdimethylarginir | 0.008324644  | 0.026597131 | 0.754764004 |
| pcaac363.taurine                   | 0.007265925  | 0.023215668 | 0.754775561 |
| smc180.pcaac321                    | 0.006464451  | 0.020661333 | 0.75485008  |
| pcaec406.pcaac281                  | 0.000469149  | 0.001500077 | 0.754946202 |
| serotonin.putrescine               | -0.007460581 | 0.023859832 | 0.754996419 |

|                                    |              |             |             |
|------------------------------------|--------------|-------------|-------------|
| kynurenine.smc261                  | 0.009585586  | 0.03065635  | 0.755000281 |
| pcaec321.threonine                 | 0.008776429  | 0.02807072  | 0.755018796 |
| smc180.pcaec402                    | -0.014473381 | 0.046293285 | 0.755025499 |
| pcaec363.pcaac383                  | 0.001836415  | 0.00587693  | 0.755151949 |
| pcaac360.pcaac422                  | 0.011633732  | 0.03723082  | 0.755154036 |
| smohc221.lysopcac180               | 0.012586478  | 0.040283228 | 0.755173944 |
| pcaac420.valine                    | -0.018926278 | 0.06057549  | 0.755180309 |
| smc181.serotonin                   | 0.020786986  | 0.066545167 | 0.755231197 |
| c181.smc161                        | -0.017470438 | 0.055937479 | 0.7552716   |
| lysopcac281.spermidine             | -0.016604783 | 0.053166356 | 0.755274105 |
| pcaac322.smohc241                  | -0.009141782 | 0.02927331  | 0.755294443 |
| pcaec322.pcaac360                  | 0.015958445  | 0.051102056 | 0.75529816  |
| histidine.valine                   | -0.01771267  | 0.056737954 | 0.755375486 |
| pcaac344.pcaec341                  | -0.02845299  | 0.09114712  | 0.755389328 |
| serine.pcaac300                    | -0.01872619  | 0.060000615 | 0.755439048 |
| pcaec422.pcaec425                  | -0.001162503 | 0.003728083 | 0.755648958 |
| pcaac300.h1                        | 0.00046548   | 0.001492868 | 0.755664468 |
| pcaec300.pcaac360                  | -0.006143611 | 0.019704516 | 0.755676437 |
| pcaac405.pcaac421                  | 0.013069298  | 0.041917795 | 0.755678666 |
| pcaec423.pcaac425                  | 0.028084874  | 0.090112692 | 0.755769742 |
| lysopcac280.smc260                 | -0.006655963 | 0.021361683 | 0.755830187 |
| serotonin.c5                       | 0.004432778  | 0.014229685 | 0.755881731 |
| c14.pcaac363                       | 0.001439007  | 0.004620303 | 0.75592969  |
| smc241.pcaac424                    | -0.003612588 | 0.011609276 | 0.756135881 |
| methionine.pcaec341                | 0.017666512  | 0.056795056 | 0.756229918 |
| pcaac404.pcaac363                  | -0.002819414 | 0.009064432 | 0.756241896 |
| pcaec361.c0                        | -0.000194721 | 0.000626274 | 0.756334659 |
| asparticacid.pcaec446              | -0.017979285 | 0.057842944 | 0.756402766 |
| lysine.histidine                   | -0.030635732 | 0.098573707 | 0.756432548 |
| methionine.pcaac342                | -0.005417449 | 0.017433865 | 0.756468377 |
| glycine.lysopcac140                | 0.000243579  | 0.000783958 | 0.756497508 |
| pcaac386.c102                      | 0.01000205   | 0.032195523 | 0.75652679  |
| smohc241.smc202                    | -0.014743298 | 0.047463505 | 0.756558655 |
| glutamicacid.lysopcac204           | 0.014526504  | 0.046782599 | 0.756644408 |
| c5.pcaec365                        | -0.006604559 | 0.021272172 | 0.756668709 |
| pcaac385.pcaac342                  | -0.001167166 | 0.00375977  | 0.75670158  |
| alphaaminoadipicacid.smc260        | -0.00515281  | 0.016601879 | 0.756747391 |
| smc261.pcaac385                    | -0.003020736 | 0.009734772 | 0.756801569 |
| c12.pcaec386                       | -0.000623248 | 0.002008562 | 0.756807691 |
| histidine.pcaac366                 | -0.003688814 | 0.011892021 | 0.756886037 |
| asymmetricdimethylarginine.alanine | 0.006516127  | 0.021008067 | 0.756901042 |
| pcaec364.c142                      | 0.010252977  | 0.033056623 | 0.756907503 |
| smc180.methionine                  | 0.00519782   | 0.016764305 | 0.756991937 |
| pcaec363.smc160                    | -0.031062888 | 0.100205502 | 0.757038203 |
| pcaac361.acetylorlithoine          | 0.005413846  | 0.017474088 | 0.757167561 |

|                                    |              |             |             |
|------------------------------------|--------------|-------------|-------------|
| c102.pcaec421                      | -0.001439108 | 0.004645656 | 0.757202796 |
| pcaac361.pcaec420                  | 0.010050795  | 0.03245099  | 0.757242758 |
| pcaec382.pcaac384                  | 0.013323048  | 0.043018611 | 0.757256426 |
| pcaac384.taurine                   | 0.005143878  | 0.016611654 | 0.757293969 |
| c142.methioninesulfoxide           | 0.00393885   | 0.012723148 | 0.757349661 |
| pcaac365.valine                    | -0.01703447  | 0.055027119 | 0.757362113 |
| serine.pcaec405                    | 0.013080971  | 0.042266869 | 0.757422672 |
| pcaac404.pcaac385                  | -0.005464751 | 0.017663034 | 0.757495601 |
| pcaac384.smohc141                  | -0.00996093  | 0.032198948 | 0.75752092  |
| leucine.transhydroxyproline        | 0.010584105  | 0.034218233 | 0.757554249 |
| pcaac364.pcaac322                  | 0.014019119  | 0.045326733 | 0.757570594 |
| pcaec381.putrescine                | 0.018726428  | 0.060547865 | 0.757576101 |
| pcaac323.pcaec425                  | -0.000962639 | 0.003113846 | 0.757678653 |
| serotonin.pcaac405                 | 0.019593845  | 0.063397401 | 0.757742482 |
| smohc221.ornithine                 | -0.010531874 | 0.034084063 | 0.757793211 |
| pcaac366.lysine                    | 0.026490104  | 0.085731146 | 0.757798205 |
| alphaaminoadipicacid.pcaec365      | -0.007480511 | 0.02421572  | 0.757858226 |
| pcaac380.serotonin                 | 0.029462959  | 0.095402826 | 0.757922339 |
| pcaac384.isoleucine                | -0.005929546 | 0.019200678 | 0.757927891 |
| pcaec423.c4                        | -0.004247106 | 0.013754968 | 0.757966391 |
| smohc141.pcaec362                  | -0.00396639  | 0.012848536 | 0.758015896 |
| smc180.pcaec342                    | 0.023758775  | 0.076984956 | 0.758082581 |
| lysopcac180.lysopcac161            | -0.015909114 | 0.051555473 | 0.758107905 |
| pcaac240.pcaac342                  | -0.00169404  | 0.005489878 | 0.758113423 |
| glutamine.taurine                  | -0.007878209 | 0.025533741 | 0.758139296 |
| asymmetricdimethylarginine.pcaec42 | -0.001906865 | 0.006180971 | 0.758166176 |
| c10.c12                            | 0.024912261  | 0.08076285  | 0.758199431 |
| pcaec421.c2                        | 0.028696129  | 0.093046278 | 0.758241053 |
| c162.pcaec401                      | -0.011121282 | 0.036062493 | 0.758254655 |
| smc241.pcaec301                    | 0.01528268   | 0.049567917 | 0.758308681 |
| pcaec341.lysopcac182               | -0.004413381 | 0.014314811 | 0.758315746 |
| pcaac365.pcaec404                  | -0.005392749 | 0.017495432 | 0.75836974  |
| c2.pcaac424                        | -0.01095331  | 0.035536733 | 0.758379271 |
| pcaec403.pcaac323                  | -0.020155863 | 0.065395591 | 0.75838732  |
| pcaac385.phenylalanine             | -0.010296393 | 0.033408865 | 0.758403252 |
| pcaac405.pcaac385                  | -0.007405739 | 0.024033    | 0.75843718  |
| pcaec401.pcaac383                  | -0.001951645 | 0.006334125 | 0.758462066 |
| methionine.asymmetricdimethylargir | -0.004464727 | 0.014490495 | 0.758463412 |
| pcaac362.pcaac300                  | -0.015033506 | 0.048797823 | 0.758491346 |
| serotonin.smohc141                 | 0.001669947  | 0.005421554 | 0.758534915 |
| pcaac401.pcaac383                  | 0.002364209  | 0.007678451 | 0.758624698 |
| pcaac365.pcaac406                  | 0.014895858  | 0.048380743 | 0.758635036 |
| pcaac321.pcaec445                  | -0.006986482 | 0.022694023 | 0.758659755 |
| pcaec421.pcaec404                  | 0.014047113  | 0.045639268 | 0.758712859 |
| lysopcac140.c16                    | -0.023565536 | 0.076576777 | 0.758749526 |

|                                    |              |             |             |
|------------------------------------|--------------|-------------|-------------|
| pcaac320.pcaac281                  | 0.000859561  | 0.002794114 | 0.75882886  |
| pcaec301.spermidine                | 0.015921735  | 0.051758003 | 0.758839566 |
| asparagine.valine                  | -0.012559056 | 0.040834609 | 0.7588849   |
| c4.pcaec386                        | -0.003357291 | 0.010916003 | 0.758886638 |
| c5.smc181                          | -0.010293676 | 0.033471878 | 0.758905436 |
| acetylnithoine.serotonin           | 0.014270245  | 0.046429668 | 0.759042287 |
| c51.taurine                        | -0.007827855 | 0.025469838 | 0.759052633 |
| pcaac424.c12                       | 0.01794025   | 0.058399651 | 0.759159207 |
| pcaec446.pcaac420                  | -0.04136219  | 0.134649881 | 0.759170323 |
| pcaac424.pcaec420                  | 0.008525556  | 0.027762472 | 0.759241748 |
| pcaac360.c4                        | -0.003527282 | 0.011486425 | 0.759246756 |
| pcaac386.pcaac363                  | 0.003693041  | 0.012034429 | 0.759406008 |
| c101.pcaac385                      | 0.003701774  | 0.01206346  | 0.759417048 |
| pcaac341.pcaec385                  | -0.013133536 | 0.042819976 | 0.759525862 |
| pcaac342.pcaac403                  | -0.000829745 | 0.002705707 | 0.759564234 |
| pcaec443.pcaec406                  | 0.006808887  | 0.022203912 | 0.759573408 |
| pcaec363.lysopcac182               | 0.011039441  | 0.036004976 | 0.759606669 |
| c141.pcaac366                      | 0.005486229  | 0.017898777 | 0.759678548 |
| c141oh.pcaac323                    | 0.021276634  | 0.069418646 | 0.759691284 |
| pcaac363.pcaac344                  | 0.0193018    | 0.063000691 | 0.759784703 |
| smc161.pcaac403                    | 0.001009223  | 0.003294193 | 0.759792417 |
| pcaac383.c8                        | 0.007928912  | 0.02588286  | 0.759812113 |
| lysopcac280.pcaac344               | 0.014361053  | 0.046888396 | 0.759855208 |
| pcaac364.pcaac381                  | -0.012304271 | 0.0401788   | 0.759888422 |
| pcaac402.arginine                  | -0.020052458 | 0.065517643 | 0.760022076 |
| histidine.smc160                   | -0.018286863 | 0.059754575 | 0.760044195 |
| pcaec423.transhydroxyproline       | -0.010011076 | 0.032735027 | 0.760204749 |
| lysine.glutamine                   | 0.006065571  | 0.01984577  | 0.760346111 |
| pcaec425.pcaac384                  | 0.016488688  | 0.053952341 | 0.760361059 |
| c182.valine                        | -0.011941043 | 0.039081904 | 0.760419486 |
| smc181.glutamine                   | -0.005404219 | 0.017689562 | 0.760446582 |
| pcaac405.pcaec363                  | -0.007836364 | 0.025650906 | 0.760448702 |
| leucine.c141oh                     | -0.0324736   | 0.106299715 | 0.760455939 |
| prolinr.lysopcac280                | -0.00224206  | 0.007339933 | 0.760479003 |
| pcaec321.pcaec420                  | 0.006852019  | 0.022431878 | 0.760480214 |
| pcaec420.c141                      | -0.007478784 | 0.024484091 | 0.760483367 |
| smc180.pcaec385                    | -0.013068772 | 0.042800275 | 0.760568228 |
| pcaec425.lysopcac182               | -0.010902966 | 0.035716142 | 0.760625981 |
| pcaac300.serotonin                 | 0.019869764  | 0.065107393 | 0.760688843 |
| pcaec422.valine                    | -0.011146992 | 0.036537013 | 0.760762406 |
| pcaec343.c16                       | 0.01585523   | 0.051976462 | 0.760793798 |
| pcaac342.asymmetricdimethylarginir | 0.006350411  | 0.020818489 | 0.760800847 |
| pcaac344.pcaec444                  | -0.021433317 | 0.070266349 | 0.760806525 |
| h1.asymmetricdimethylarginine      | -0.006687964 | 0.021931174 | 0.760865192 |
| pcaac320.pcaac406                  | -0.011513295 | 0.037759408 | 0.760895931 |

|                                    |              |             |             |
|------------------------------------|--------------|-------------|-------------|
| pcaec365.valine                    | -0.021224983 | 0.069637897 | 0.760988098 |
| pcaec386.pcaec406                  | -0.007395258 | 0.024268255 | 0.761034476 |
| pcaec444.pcaec404                  | -0.004966118 | 0.016301537 | 0.761101821 |
| pcaec406.pcaac383                  | 0.001914119  | 0.006283594 | 0.761116594 |
| lysopcac281.pcaac380               | 0.006238778  | 0.02048131  | 0.761126677 |
| c162.pcaac343                      | 0.008032566  | 0.026375811 | 0.761176441 |
| c162.pcaac281                      | -0.00033427  | 0.00109765  | 0.761184326 |
| pcaec402.pcaec363                  | 0.011183391  | 0.036725417 | 0.761198677 |
| pcaec361.pcaec405                  | -0.023156797 | 0.07604926  | 0.761211073 |
| lysine.alphaaminoadipicacid        | -0.001354528 | 0.004448555 | 0.761218774 |
| lysopcac160.c4                     | 0.00411147   | 0.01350524  | 0.761258358 |
| pcaec363.pcaec406                  | 0.001263808  | 0.004151443 | 0.761265195 |
| asparticacid.pcaec362              | 0.004145224  | 0.013617268 | 0.761277917 |
| pcaec361.glutamicacid              | -0.013508373 | 0.044385347 | 0.761328337 |
| pcaec322.pcaec422                  | -0.007640121 | 0.025105509 | 0.761345503 |
| lysopcac203.pcaec341               | 0.012987222  | 0.042680713 | 0.761370322 |
| pcaac343.pcaec363                  | 0.008600056  | 0.028266469 | 0.761399548 |
| pcaac401.c14                       | -0.013320615 | 0.043782309 | 0.76140173  |
| alphaaminoadipicacid.pcaac364      | -0.012355841 | 0.040618145 | 0.761440797 |
| pcaac405.pcaac320                  | -0.02813151  | 0.092494701 | 0.761481289 |
| kynurenine.c141                    | 0.00751821   | 0.024724661 | 0.761530326 |
| pcaec381.c181                      | -0.011060972 | 0.036380667 | 0.76156302  |
| lysopcac161.c141oh                 | -0.033518008 | 0.110277525 | 0.761632971 |
| pcaec361.transhydroxyproline       | -0.012125253 | 0.039893829 | 0.761636214 |
| pcaac380.pcaec386                  | -0.004601551 | 0.015142654 | 0.761680293 |
| pcaec382.pcaec386                  | -0.00292605  | 0.009629994 | 0.76170504  |
| pcaac363.pcaec340                  | 0.016115972  | 0.053040871 | 0.761710285 |
| lysopcac203.pcaec386               | 0.002099156  | 0.006909488 | 0.761735305 |
| pcaac300.lysopcac161               | 0.019592263  | 0.06449014  | 0.761739306 |
| pcaac343.asparticacid              | 0.010725784  | 0.035305162 | 0.761739549 |
| serotonin.c142                     | 0.011307563  | 0.03722316  | 0.761758185 |
| glutamine.asymmetricdimethylargini | -0.002960832 | 0.009747394 | 0.761774463 |
| smc260.pcaec420                    | 0.003989839  | 0.01313607  | 0.761793215 |
| histidine.pcaac361                 | -0.010179342 | 0.033518451 | 0.761822016 |
| smc261.threonine                   | 0.008775673  | 0.028903266 | 0.761876367 |
| acetylmithoine.putrescine          | 0.00642354   | 0.021164286 | 0.761962826 |
| pcaec360.c102                      | 0.01574647   | 0.051900067 | 0.762045453 |
| c101.pcaac424                      | 0.001094132  | 0.003606562 | 0.762066034 |
| pcaec444.pcaac343                  | 0.003976822  | 0.013108822 | 0.762068178 |
| pcaec362.pcaec406                  | 0.001482272  | 0.004886313 | 0.762081997 |
| smc260.lysopcac181                 | 0.005842441  | 0.019262371 | 0.762114869 |
| c51dc.c2                           | -0.017568961 | 0.057931524 | 0.762143269 |
| c3.smohc241                        | -0.016681107 | 0.055028887 | 0.762247834 |
| smc181.pcaac386                    | -0.002633416 | 0.008693309 | 0.762406866 |
| c3.lysopcac281                     | -0.003556449 | 0.011741778 | 0.762434306 |

|                                    |              |             |             |
|------------------------------------|--------------|-------------|-------------|
| c18.smohc141                       | 0.0054544    | 0.018009811 | 0.762458115 |
| asparagine.lysopcac140             | -0.005420431 | 0.017898835 | 0.762473358 |
| lysopcac281.pcaec425               | -0.00082851  | 0.002735985 | 0.762486607 |
| pcaec380.pcaec385                  | -0.013022856 | 0.043005673 | 0.762488509 |
| smc240.pcaac342                    | 0.001990682  | 0.006575861 | 0.762558079 |
| c141.pcaec425                      | -0.000981135 | 0.003242935 | 0.762695144 |
| pcaec401.pcaec385                  | 0.010921479  | 0.036101751 | 0.762714984 |
| smc202.c0                          | -0.000265466 | 0.000877566 | 0.762727831 |
| pcaec321.phenylalanine             | -0.009469797 | 0.031305628 | 0.762733488 |
| smc260.pcaac322                    | 0.00692976   | 0.022909806 | 0.762744877 |
| pcaac380.pcaac422                  | 0.010797421  | 0.035698072 | 0.762756274 |
| c51.pcaac361                       | 0.020138259  | 0.066581448 | 0.762759749 |
| glycine.pcaec343                   | -0.019030343 | 0.062933546 | 0.762814977 |
| pcaec363.pcaac426                  | -0.009907386 | 0.032768061 | 0.762844661 |
| phenylalanine.pcaec446             | -0.029070658 | 0.096171042 | 0.762896456 |
| pcaec424.pcaec365                  | 0.006209528  | 0.02054231  | 0.762897115 |
| smohc141.citruline                 | -0.010105054 | 0.03343464  | 0.76293275  |
| arginine.smc240                    | 0.009136385  | 0.030229865 | 0.762934748 |
| pcaac361.c18                       | -0.011225173 | 0.037143215 | 0.762947804 |
| c18.lysopcac182                    | -0.004751524 | 0.015723512 | 0.762963768 |
| lysopcac170.glycine                | -0.008208846 | 0.027166506 | 0.762982311 |
| c182.pcaac323                      | -0.019678232 | 0.065147337 | 0.763066409 |
| pcaac300.c182                      | 0.011119421  | 0.036820205 | 0.763115846 |
| pcaac320.asparticacid              | 0.014370059  | 0.047585145 | 0.763120502 |
| pcaac384.threonine                 | 0.006973972  | 0.02309372  | 0.763120953 |
| pcaec300.c142                      | 0.011920458  | 0.039477447 | 0.763143389 |
| pcaec424.pcaac320                  | -0.009215673 | 0.030523635 | 0.763171465 |
| smohc222.lysopcac203               | -0.003752711 | 0.012433926 | 0.763252906 |
| c16.pcaec301                       | -0.012584303 | 0.04171267  | 0.763345717 |
| asparticacid.c3                    | -0.008738852 | 0.028967432 | 0.763354603 |
| lysopcac182.methionine             | 0.007950355  | 0.026359011 | 0.763400559 |
| serotonin.smc241                   | 0.003071357  | 0.010183164 | 0.763405764 |
| lysopcac281.smc241                 | 0.005009454  | 0.0166159   | 0.763501403 |
| glutamicacid.pcaac360              | 0.016501244  | 0.05475987  | 0.763613461 |
| pcaac424.pcaec425                  | -0.001531066 | 0.005082763 | 0.763697989 |
| pcaec444.c102                      | -0.004993892 | 0.016580468 | 0.763725299 |
| pcaac364.asymmetricdimethylarginir | -0.004308437 | 0.01430683  | 0.763760167 |
| c14.pcaac320                       | -0.013593569 | 0.045140312 | 0.763764046 |
| c102.c51                           | 0.004276663  | 0.014204192 | 0.763806489 |
| c5.pcaac403                        | -0.001587154 | 0.005271624 | 0.763813836 |
| pcaac341.smc180                    | -0.002215413 | 0.007359625 | 0.763853712 |
| pcaec384.pcaec301                  | 0.017569333  | 0.058372479 | 0.763881042 |
| lysopcac180.pcaec362               | 0.006935244  | 0.023043019 | 0.763894109 |
| smohc241.asparticacid              | -0.008772853 | 0.029158335 | 0.763970161 |
| pcaec343.smc240                    | 0.009148243  | 0.030406251 | 0.763971914 |

|                                    |              |             |             |
|------------------------------------|--------------|-------------|-------------|
| asymmetricdimethylarginine.c142    | -0.009191014 | 0.030548431 | 0.763972063 |
| isoleucine.lysopcac181             | -0.014360964 | 0.047737004 | 0.763996358 |
| glycine.pcaec420                   | -0.010610539 | 0.035283812 | 0.764084098 |
| smc202.pcaec386                    | -0.003094722 | 0.010291309 | 0.764089865 |
| pcaac366.pcaec342                  | 0.025001681  | 0.083158963 | 0.764137734 |
| pcaac343.pcaec425                  | -0.000734857 | 0.002444367 | 0.764150211 |
| pcaac365.pcaec343                  | -0.021650705 | 0.072028608 | 0.764186787 |
| arginine.histidine                 | -0.016257849 | 0.054111127 | 0.764287106 |
| putrescine.lysopcac280             | 0.002328704  | 0.007752235 | 0.764334037 |
| phenylalanine.pcaec361             | 0.000964199  | 0.003210615 | 0.764391389 |
| pcaac362.lysopcac140               | -0.00048748  | 0.001623323 | 0.764405521 |
| pcaec362.pcaec405                  | -0.009451888 | 0.031475648 | 0.764409548 |
| pcaac420.asparticacid              | 0.009259279  | 0.030841408 | 0.764462641 |
| pcaac404.pcaec364                  | -0.004608555 | 0.015353986 | 0.764514896 |
| c18.pcaec421                       | 0.000370932  | 0.001236002 | 0.764550973 |
| pcaec364.asymmetricdimethylarginir | -0.007024705 | 0.023414807 | 0.764623333 |
| pcaec401.valine                    | -0.0116348   | 0.038794163 | 0.764699526 |
| phenylalanine.pcaec383             | -0.013129949 | 0.043786182 | 0.764734524 |
| c51.pcaec343                       | -0.014216366 | 0.047420959 | 0.764791124 |
| pcaec425.c16                       | 0.008070004  | 0.026927431 | 0.764864392 |
| pcaac320.lysine                    | -0.018366725 | 0.061295472 | 0.764904031 |
| phenylalanine.pcaec384             | 0.004739275  | 0.015817628 | 0.764921229 |
| pcaac341.methioninesulfoxide       | 0.004982076  | 0.016631672 | 0.764971708 |
| pcaac422.pcaec425                  | -0.000648907 | 0.002168281 | 0.765185601 |
| pcaac406.pcaac300                  | 0.018089887  | 0.0604527   | 0.765210137 |
| smc161.c12                         | 0.011537989  | 0.038559173 | 0.765219455 |
| pcaac384.smohc161                  | 0.007804957  | 0.02608653  | 0.765244747 |
| pcaac364.ornithine                 | -0.00608538  | 0.020340248 | 0.765256645 |
| pcaec340.pcaac300                  | 0.025924197  | 0.08666132  | 0.76528364  |
| pcaec446.pcaec322                  | -0.018982558 | 0.063461511 | 0.765302353 |
| c181.alphaaminoadipicacid          | 0.000832153  | 0.002782295 | 0.765325601 |
| lysopcac140.acetylornithoine       | 0.00319039   | 0.010667735 | 0.765340496 |
| c102.smc240                        | 0.012412051  | 0.041504691 | 0.765353716 |
| c51dc.pcaec301                     | 0.025567627  | 0.08549657  | 0.765356147 |
| c4.putrescine                      | -0.017890602 | 0.059836936 | 0.765401301 |
| c4.pcaac424                        | -0.004654389 | 0.015570749 | 0.765454973 |
| pcaec420.pcaec406                  | 0.004317515  | 0.014455535 | 0.76564017  |
| pcaac281.lysopcac203               | 0.002731752  | 0.009146311 | 0.765642422 |
| pcaac420.smc180                    | -0.003235601 | 0.010834127 | 0.765660403 |
| kynurenine.pcaec322                | -0.013784403 | 0.046159606 | 0.76567881  |
| pcaec384.serine                    | -0.009637577 | 0.03227459  | 0.765688637 |
| c18.pcaec383                       | 0.023786226  | 0.079658435 | 0.765695616 |
| pcaac321.pcaec343                  | 0.024392435  | 0.081722572 | 0.765790176 |
| h1.pcaec342                        | 0.028617944  | 0.095883417 | 0.765799704 |
| smohc141.h1                        | 0.000360773  | 0.001209088 | 0.7658618   |



|                       |              |             |             |
|-----------------------|--------------|-------------|-------------|
| pcaec446.creatinine   | 0.006438555  | 0.02157922  | 0.765874139 |
| pcaec385.lysopcac160  | -0.00312628  | 0.010479947 | 0.765917995 |
| pcaec425.pcaec361     | -0.003334434 | 0.011177951 | 0.765922627 |
| pcaec406.methionine   | -0.00657403  | 0.022042866 | 0.765973028 |
| smohc221.c18          | -0.008609657 | 0.028871525 | 0.76599787  |
| pcaec361.prolinr      | -0.008955569 | 0.030033633 | 0.766013986 |
| c162.threonine        | 0.007482208  | 0.025094858 | 0.766035021 |
| pcaec402.serine       | -0.01347106  | 0.045188478 | 0.766072142 |
| isoleucine.c12        | -0.008908745 | 0.029897998 | 0.766176482 |
| glutamicacid.pcaec420 | -0.011498579 | 0.038592839 | 0.766195812 |
| serotonin.pcaec361    | 0.003947818  | 0.013252175 | 0.766231039 |
| pcaac381.c142         | 0.008992309  | 0.030190805 | 0.766269427 |
| pcaac364.c3           | 0.006566472  | 0.022051724 | 0.766325295 |
| pcaec423.pcaac383     | 0.002930823  | 0.009843082 | 0.7663415   |
| h1.pcaac342           | -0.001665089 | 0.005592321 | 0.766348383 |
| pcaac341.pcaec343     | -0.024996828 | 0.083962138 | 0.766371316 |
| pcaec401.pcaac362     | 0.004862776  | 0.016333695 | 0.766372144 |
| c141.lysopcac161      | -0.023929154 | 0.080380973 | 0.766385591 |
| pcaac366.pcaac401     | 0.003326604  | 0.011176818 | 0.766433161 |
| c102.pcaec340         | 0.017103565  | 0.057478433 | 0.766485999 |
| pcaec423.lysopcac140  | -0.00045577  | 0.001531908 | 0.766521662 |
| c8.pcaac425           | -0.019304948 | 0.064903201 | 0.76657951  |
| smc202.taurine        | -0.012538995 | 0.042168012 | 0.766643626 |
| pcaec343.c4           | -0.004031766 | 0.013559275 | 0.766654469 |
| h1.smc241             | 0.004136296  | 0.01391533  | 0.766727837 |
| pcaec363.pcaac300     | -0.018990363 | 0.063904411 | 0.766788153 |
| pcaac380.pcaac360     | 0.015174143  | 0.051067855 | 0.766812055 |
| smohc241.asparagine   | -0.002282746 | 0.007683264 | 0.766835313 |
| isoleucine.pcaac300   | 0.009312259  | 0.031344907 | 0.766847766 |
| smohc222.serotonin    | 0.020739389  | 0.069812907 | 0.766862256 |
| pcaec420.creatinine   | 0.003940731  | 0.013269023 | 0.766926027 |
| pcaec361.pcaac404     | 0.002068052  | 0.006965482 | 0.766992435 |
| phenylalanine.taurine | -0.010339064 | 0.03482376  | 0.766994939 |
| c141oh.smc240         | 0.008079906  | 0.02722345  | 0.767069093 |
| putrescine.c18        | -0.005842461 | 0.01969089  | 0.76713819  |
| pcaec386.lysopcac160  | -0.006914126 | 0.023308473 | 0.767193856 |
| pcaec343.c12          | -0.017435257 | 0.058784038 | 0.767222243 |
| pcaac344.pcaec406     | 0.003181488  | 0.01072787  | 0.767249399 |
| smc202.methionine     | 0.005073898  | 0.017109099 | 0.767250523 |
| c141oh.pcaac320       | -0.019564921 | 0.065986656 | 0.767298694 |
| ornithine.lysopcac181 | 0.006677248  | 0.022528866 | 0.767383879 |
| pcaec425.pcaac321     | 0.004469147  | 0.015085236 | 0.767480402 |
| glycine.c3            | 0.010205866  | 0.034454663 | 0.76751715  |
| pcaec380.pcaac422     | 0.023961247  | 0.080894382 | 0.767522762 |
| pcaec403.pcaec384     | -0.0079799   | 0.026940867 | 0.76752546  |

|                              |              |             |             |
|------------------------------|--------------|-------------|-------------|
| smc261.pcaec401              | -0.008360263 | 0.0282256   | 0.767530175 |
| pcaec381.c3                  | 0.011451235  | 0.03866163  | 0.767532577 |
| asparagine.c2                | 0.020178712  | 0.068144482 | 0.767589436 |
| lysopcac180.pcaec360         | -0.001326883 | 0.004482009 | 0.767642914 |
| lysopcac180.c51dc            | -0.029583791 | 0.099945425 | 0.767678704 |
| pcaac364.taurine             | 0.003095788  | 0.010460398 | 0.767713949 |
| pcaac360.serotonin           | -0.021237741 | 0.071761437 | 0.767716984 |
| leucine.glutamicacid         | 0.009659567  | 0.032643968 | 0.767749431 |
| c141oh.c51                   | 0.008677277  | 0.029331081 | 0.767800988 |
| smc161.pcaec425              | -0.003139658 | 0.010613116 | 0.767809289 |
| c102.c142                    | -0.012373039 | 0.041827645 | 0.767823013 |
| pcaec425.lysopcac181         | -0.016850925 | 0.056972627 | 0.767851803 |
| pcaac404.pcaac383            | -0.001293155 | 0.004372629 | 0.767877537 |
| c0.isoleucine                | 0.003296102  | 0.011146676 | 0.767904844 |
| smohc241.pcaac360            | -0.00699047  | 0.023665646 | 0.768147206 |
| pcaec443.pcaec423            | 0.005822229  | 0.019710667 | 0.768147227 |
| c51.spermidine               | -0.015853766 | 0.05368251  | 0.76819303  |
| pcaac421.c12                 | 0.009514198  | 0.032217955 | 0.768206196 |
| c2.ornithine                 | 0.020712659  | 0.07017654  | 0.768325533 |
| pcaac366.pcaac363            | 0.00493729   | 0.016729573 | 0.768346315 |
| pcaec383.pcaec424            | 0.005466308  | 0.018522144 | 0.768346814 |
| c14.lysopcac203              | -0.00357771  | 0.012127223 | 0.768429198 |
| lysopcac161.lysopcac140      | -0.000381293 | 0.001292628 | 0.768459758 |
| kynurenine.pcaec384          | 0.003850908  | 0.013059246 | 0.76853205  |
| pcaec380.pcaec386            | -0.003420711 | 0.01160052  | 0.768535238 |
| pcaac360.lysopcac181         | 0.006909813  | 0.023436807 | 0.768572019 |
| pcaac344.methioninesulfoxide | 0.005946445  | 0.020177779 | 0.76866712  |
| asparagine.lysopcac161       | 0.012659223  | 0.04296219  | 0.768699934 |
| histidine.pcaec404           | 0.006497088  | 0.02205417  | 0.768747822 |
| glycine.pcaec365             | 0.00620239   | 0.02106335  | 0.768849363 |
| pcaec362.methioninesulfoxide | 0.003049003  | 0.010354945 | 0.768860503 |
| lysine.pcaec386              | 0.003064812  | 0.010410063 | 0.768891336 |
| histidine.putrescine         | 0.006259906  | 0.021273192 | 0.769002594 |
| histidine.acetylnithoine     | 0.00513343   | 0.017445853 | 0.769012775 |
| pcaac343.lysopcac140         | 0.001088274  | 0.003700934 | 0.769161667 |
| phenylalanine.smohc141       | -0.003548558 | 0.012068468 | 0.769175768 |
| smc240.pcaac365              | -0.01735749  | 0.059040419 | 0.769207943 |
| putrescine.lysopcac182       | 0.00388226   | 0.013205339 | 0.769209155 |
| pcaec423.pcaec420            | 0.004655568  | 0.0158371   | 0.769228822 |
| c102.smc180                  | -0.006103137 | 0.020777307 | 0.769400729 |
| pcaac405.pcaac362            | -0.002886319 | 0.009826977 | 0.76942105  |
| pcaec402.pcaac320            | 0.024037475  | 0.081852971 | 0.769457176 |
| lysopcac280.pcaac385         | -0.008157706 | 0.02778118  | 0.769476262 |
| glycine.pcaec406             | 0.002252175  | 0.007672539 | 0.76955585  |
| lysine.pcaec383              | -0.016238589 | 0.055323928 | 0.769570135 |

|                                 |              |             |             |
|---------------------------------|--------------|-------------|-------------|
| smohc241.c12                    | 0.015400366  | 0.05247408  | 0.769595431 |
| ornithine.pcaac321              | -0.005653494 | 0.019263425 | 0.769596849 |
| pcaac425.pcaac380               | -0.016543993 | 0.056378151 | 0.769624647 |
| pcaec322.pcaac383               | 0.000988704  | 0.003369691 | 0.769652245 |
| pcaac364.pcaec340               | 0.016272181  | 0.055461525 | 0.769663576 |
| pcaec424.glycine                | -0.00392158  | 0.013372178 | 0.769764012 |
| pcaac380.c142                   | -0.014205281 | 0.048439568 | 0.769768862 |
| c182.putrescine                 | -0.006622404 | 0.022586667 | 0.769813158 |
| isoleucine.glycine              | -0.009997041 | 0.034106275 | 0.769878209 |
| pcaec384.pcaec385               | 0.016105343  | 0.054957331 | 0.769925993 |
| pcaac323.pcaac380               | 0.009746052  | 0.03325834  | 0.769934319 |
| c0.histidine                    | 0.014593646  | 0.04980693  | 0.769962173 |
| pcaac401.pcaac281               | -0.000611409 | 0.002087434 | 0.77004203  |
| pcaec421.smc161                 | -0.026885585 | 0.091798569 | 0.770060173 |
| smc202.smohc222                 | -0.002015692 | 0.00688275  | 0.770071197 |
| pcaec421.pcaac420               | 0.038782349  | 0.132447881 | 0.770108763 |
| pcaec444.c14                    | -0.012234857 | 0.041791336 | 0.77014807  |
| smohc241.pcaec402               | 0.010739022  | 0.036683303 | 0.770156482 |
| spermidine.alphaaminoadipicacid | 0.004984629  | 0.017042276 | 0.770357472 |
| smohc221.c4                     | -0.003072713 | 0.010505828 | 0.77036443  |
| glutamine.methioninesulfoxide   | -0.004198763 | 0.014357415 | 0.770388375 |
| acetylornithoine.lysopcac170    | -0.003880847 | 0.013270988 | 0.770399598 |
| pcaac422.serotonin              | -0.024630166 | 0.084233876 | 0.770421533 |
| lysopcac280.asparticacid        | -0.013453043 | 0.046011541 | 0.770435292 |
| pcaac402.pcaac383               | 0.002099598  | 0.007181064 | 0.77043859  |
| smc240.pcaec425                 | 0.000835363  | 0.002857427 | 0.770462978 |
| isoleucine.lysopcac161          | -0.023730115 | 0.081171878 | 0.770465851 |
| c181.pcaec365                   | -0.0059285   | 0.020284769 | 0.770527195 |
| lysopcac182.arginine            | -0.015223693 | 0.052096995 | 0.770561811 |
| pcaec363.pcaec402               | -0.012576204 | 0.0430384   | 0.770568939 |
| pcaac342.smohc161               | -0.005371025 | 0.018396042 | 0.770754    |
| smc261.pcaec386                 | 0.002772013  | 0.009495187 | 0.77077505  |
| pcaec402.pcaec446               | -0.008476473 | 0.029037047 | 0.770789949 |
| arginine.pcaac360               | -0.015644155 | 0.053592397 | 0.770797019 |
| pcaac344.ornithine              | -0.005718418 | 0.019590891 | 0.77081099  |
| ornithine.pcaec384              | 0.004288367  | 0.014698077 | 0.77090854  |
| pcaec364.pcaac240               | 0.003276181  | 0.011230753 | 0.770945626 |
| alanine.arginine                | 0.004361845  | 0.014956148 | 0.77100129  |
| pcaec381.pcaac361               | -0.011297965 | 0.038739436 | 0.771003091 |
| alphaaminoadipicacid.pcaec425   | 0.00069092   | 0.002369366 | 0.771029319 |
| leucine.smohc241                | 0.011122397  | 0.038145354 | 0.771049294 |
| putrescine.glutamine            | 0.006146183  | 0.021080159 | 0.77106218  |
| pcaec444.c8                     | 0.010834366  | 0.037159736 | 0.77106255  |
| pcaec423.pcaec383               | -0.020947306 | 0.071852096 | 0.771084144 |
| pcaec362.c8                     | -0.011669215 | 0.040029702 | 0.771099228 |

|                                 |              |             |             |
|---------------------------------|--------------|-------------|-------------|
| pcaec405.pcaac384               | 0.011959042  | 0.041025972 | 0.771110371 |
| pcaec340.pcaec385               | -0.015752264 | 0.054044946 | 0.771135793 |
| pcaec364.c51                    | -0.005920738 | 0.020321794 | 0.771224952 |
| pcaac420.methioninesulfoxide    | 0.005187533  | 0.01781176  | 0.77130669  |
| smc202.spermidine               | 0.015388824  | 0.05283976  | 0.771311537 |
| pcaac424.pcaec341               | -0.00532729  | 0.018299405 | 0.771401181 |
| pcaec382.pcaec322               | 0.016880103  | 0.058008624 | 0.771496752 |
| c51dc.pcaac240                  | 0.005600058  | 0.019244685 | 0.771497178 |
| c10.methioninesulfoxide         | 0.003649354  | 0.012542325 | 0.771519529 |
| lysopcac161.smc261              | 0.014953632  | 0.051420143 | 0.771634342 |
| pcaec364.pcaec444               | 0.023498062  | 0.080809406 | 0.771656451 |
| pcaec445.pcaec443               | 0.009766762  | 0.03361123  | 0.771811727 |
| lysopcac203.c182                | 0.010770032  | 0.037077821 | 0.77189517  |
| pcaec405.pcaac320               | -0.021070788 | 0.0725454   | 0.771911441 |
| pcaec301.c141                   | -0.008736357 | 0.030083933 | 0.771949804 |
| smc181.taurine                  | -0.01242864  | 0.042802586 | 0.771971316 |
| pcaec422.pcaec380               | 0.029047037  | 0.100038704 | 0.771981429 |
| pcaac380.pcaec401               | -0.009663339 | 0.033281157 | 0.771983967 |
| pcaec360.methioninesulfoxide    | 0.003528471  | 0.012155452 | 0.772041788 |
| pcaec365.c16                    | 0.008803823  | 0.030332366 | 0.772067547 |
| pcaec401.pcaec425               | -0.000854132 | 0.002943432 | 0.77211547  |
| serotonin.acetylorlnothine      | 0.005112053  | 0.017618458 | 0.772137694 |
| pcaec300.pcaec421               | 0.000821063  | 0.002830181 | 0.772171064 |
| c51.c18                         | -0.013357801 | 0.046052907 | 0.772213962 |
| serotonin.pcaec362              | -0.00816705  | 0.028159511 | 0.772233229 |
| c3.pcaac360                     | 0.007896719  | 0.027229701 | 0.772251747 |
| smc260.pcaac401                 | -0.009138124 | 0.031515816 | 0.772290128 |
| smc241.taurine                  | 0.007533663  | 0.025988965 | 0.772346852 |
| lysine.smc260                   | 0.002686995  | 0.009271069 | 0.772387658 |
| pcaec364.pcaec362               | 0.006599504  | 0.022774122 | 0.772422021 |
| pcaac383.pcaac381               | -0.010255852 | 0.035391993 | 0.772423521 |
| smc261.asparticacid             | -0.008489462 | 0.029304929 | 0.772488318 |
| pcaec321.pcaac406               | -0.009194119 | 0.031751054 | 0.772583797 |
| pcaec342.taurine                | 0.011297504  | 0.039047913 | 0.772770705 |
| smc180.valine                   | 0.012030554  | 0.041582875 | 0.772777611 |
| pcaec300.pcaac402               | 0.015194853  | 0.05254243  | 0.772871583 |
| pcaac321.smohc221               | -0.011556003 | 0.040009761 | 0.773148362 |
| c14.ornithine                   | -0.007646417 | 0.026474723 | 0.773156038 |
| c51.serine                      | 0.007034019  | 0.024356312 | 0.773173575 |
| pcaec361.methioninesulfoxide    | 0.003363273  | 0.011648827 | 0.773230503 |
| pcaec321.pcaec380               | 0.011896373  | 0.041214527 | 0.773289218 |
| pcaac281.methioninesulfoxide    | 0.002469891  | 0.008558397 | 0.773329283 |
| serotonin.c162                  | -0.013770167 | 0.047715994 | 0.773334407 |
| pcaec384.smohc141               | -0.005602118 | 0.019414724 | 0.773361894 |
| c101.asymmetricdimethylarginine | 0.002596994  | 0.009000267 | 0.773364683 |

|                         |              |             |             |
|-------------------------|--------------|-------------|-------------|
| histidine.glutamicacid  | 0.008363582  | 0.028986159 | 0.77337174  |
| pcaac381.smohc241       | 0.013631677  | 0.04724866  | 0.773392981 |
| asparticacid.pcaac240   | 0.006267826  | 0.02172984  | 0.773443392 |
| pcaec342.asparagine     | 0.002382365  | 0.008262399 | 0.773523693 |
| pcaec443.smohc141       | -0.00584714  | 0.020279082 | 0.7735272   |
| c141.pcaac344           | -0.015075801 | 0.052299252 | 0.77358311  |
| pcaec404.serine         | 0.018326469  | 0.063576163 | 0.77358332  |
| c162.pcaac384           | 0.010365055  | 0.035962451 | 0.773614844 |
| smc181.smohc141         | -0.006201525 | 0.021521233 | 0.773660948 |
| smohc241.c182           | -0.006047036 | 0.02098598  | 0.773670106 |
| c2.lysopcac280          | 0.003538177  | 0.012281914 | 0.773720641 |
| pcaac426.pcaec425       | -0.001288846 | 0.004474319 | 0.77374061  |
| pcaac406.pcaac240       | -0.005051035 | 0.017543286 | 0.77384429  |
| pcaac362.pcaec420       | 0.004955713  | 0.017212634 | 0.773849684 |
| phenylalanine.pcaec362  | 0.002559     | 0.00889001  | 0.77389561  |
| pcaac240.lysopcac160    | 0.007568865  | 0.026298852 | 0.773933139 |
| smohc141.methionine     | -0.003949829 | 0.013724785 | 0.773943901 |
| c141.pcaac380           | -0.012016991 | 0.041762109 | 0.773973968 |
| pcaac365.pcaac320       | 0.016453642  | 0.057185005 | 0.773990892 |
| c5.alphaaminoadipicacid | -0.002185554 | 0.007598185 | 0.774055705 |
| pcaec382.kynurenine     | 0.002349875  | 0.008169778 | 0.774064471 |
| histidine.pcaac383      | 0.008297412  | 0.028851261 | 0.774093109 |
| c0.pcaac300             | 0.013957575  | 0.0485703   | 0.77426438  |
| pcaac385.pcaac300       | 0.027341789  | 0.09514713  | 0.774268397 |
| c141.glutamicacid       | 0.008851167  | 0.030802141 | 0.774274256 |
| pcaac366.serotonin      | -0.024482299 | 0.085202252 | 0.774283617 |
| lysopcac182.h1          | 0.00071684   | 0.002495033 | 0.774311649 |
| c101.pcaac361           | 0.010464237  | 0.03643362  | 0.77438262  |
| pcaac361.pcaac385       | -0.004315998 | 0.015027714 | 0.77439117  |
| pcaac384.pcaac300       | 0.015893322  | 0.055381357 | 0.774561497 |
| c16.pcaac363            | 0.004765437  | 0.016607833 | 0.774592449 |
| pcaec380.pcaac365       | 0.013629425  | 0.047504846 | 0.774617762 |
| pcaec421.pcaec425       | -0.001449104 | 0.005050951 | 0.774624507 |
| pcaec383.tyrosine       | -0.016974538 | 0.059180199 | 0.774677362 |
| methionine.pcaec423     | 0.002766063  | 0.009645525 | 0.77472039  |
| pcaec406.c3             | 0.00501328   | 0.017484719 | 0.774757207 |
| lysine.lysopcac182      | -0.006143765 | 0.021445364 | 0.774939817 |
| pcaec341.pcaac383       | 0.000974262  | 0.003400902 | 0.774949679 |
| pcaac364.smohc141       | 0.013871799  | 0.048425572 | 0.774961571 |
| pcaac320.taurine        | 0.005768596  | 0.02013787  | 0.77496229  |
| pcaac425.c162           | 0.015387792  | 0.053725195 | 0.774991678 |
| c51.pcaec422            | -0.004752723 | 0.016595053 | 0.775009042 |
| pcaec405.pcaac360       | -0.015055687 | 0.052590804 | 0.775096254 |
| pcaac281.lysopcac182    | -0.004769786 | 0.016661856 | 0.775103948 |
| lysopcac180.isoleucine  | 0.007013768  | 0.024505751 | 0.775150359 |

|                         |              |             |             |
|-------------------------|--------------|-------------|-------------|
| pcaec301.pcaec425       | -0.000723048 | 0.002527321 | 0.7752394   |
| c2.taurine              | -0.015795211 | 0.055265764 | 0.775459456 |
| c10.smc160              | -0.015785868 | 0.055235518 | 0.77546912  |
| c18.smc161              | -0.016477833 | 0.057678736 | 0.775552427 |
| pcaac385.creatinine     | 0.003207445  | 0.01122904  | 0.77558651  |
| pcaac403.lysopcac203    | 0.004754718  | 0.016651588 | 0.775660629 |
| pcaec365.putrescine     | -0.017309984 | 0.060627149 | 0.775680538 |
| c141.pcaec401           | 0.012427672  | 0.043539977 | 0.775744811 |
| smc240.pcaac322         | 0.01846659   | 0.06470768  | 0.77578034  |
| pcaec364.acetylmithoine | 0.008311433  | 0.02912398  | 0.775783206 |
| c4.serine               | 0.008331341  | 0.029197893 | 0.775814229 |
| c5.pcaac281             | -0.00144748  | 0.005073833 | 0.775857995 |
| pcaec322.glycine        | -0.018868055 | 0.066150611 | 0.77589966  |
| c141.pcaac322           | -0.014086422 | 0.049390761 | 0.775918888 |
| pcaac403.pcaac360       | -0.014247308 | 0.049970947 | 0.775989029 |
| pcaac281.pcaec384       | 0.012522184  | 0.043934327 | 0.776058849 |
| pcaec321.h1             | 0.000413773  | 0.001452033 | 0.776104428 |
| pcaec364.pcaec420       | -0.004435593 | 0.015570199 | 0.776168514 |
| smc241.c14              | 0.011677346  | 0.040991148 | 0.776170236 |
| pcaec383.pcaac426       | 0.017427925  | 0.061178898 | 0.776175256 |
| alanine.isoleucine      | 0.005131362  | 0.018013655 | 0.776181898 |
| pcaac404.c12            | -0.011751548 | 0.041258091 | 0.776204391 |
| c51.c142                | -0.015043146 | 0.052845404 | 0.776331967 |
| citruiline.pcaac342     | -0.001190287 | 0.004182104 | 0.776369406 |
| pcaec386.pcaec425       | -0.001446458 | 0.005083935 | 0.776444979 |
| c142.pcaac383           | 0.001365384  | 0.004800464 | 0.776512192 |
| c12.pcaec342            | 0.0150536    | 0.052927999 | 0.776520604 |
| pcaec363.pcaac380       | -0.022754725 | 0.080032632 | 0.77659591  |
| lysopcac161.c4          | 0.003790385  | 0.013332318 | 0.776609367 |
| pcaac360.lysopcac204    | 0.009184997  | 0.032307434 | 0.776609892 |
| glycine.pcaec403        | -0.00494516  | 0.017402672 | 0.776716065 |
| glycine.c18             | 0.011884814  | 0.041828162 | 0.776736475 |
| c181.smohc161           | -0.003512885 | 0.012365826 | 0.77677788  |
| pcaec405.threonine      | -0.007125782 | 0.025083736 | 0.77677816  |
| lysopcac182.pcaec421    | -0.000651129 | 0.002292123 | 0.776783815 |
| pcaac426.smc180         | 0.00284268   | 0.010008397 | 0.776816611 |
| ornithine.c8            | -0.01054143  | 0.037123823 | 0.776874911 |
| c141oh.pcaec425         | 0.002035444  | 0.007168238 | 0.776874917 |
| pcaac361.pcaec382       | -0.001472436 | 0.005185925 | 0.776893193 |
| smc160.phenylalanine    | -0.011342932 | 0.039956331 | 0.776928458 |
| lysopcac160.pcaac383    | -0.002015292 | 0.007100778 | 0.776982282 |
| lysopcac281.pcaac240    | 0.00337946   | 0.01190925  | 0.77701687  |
| c5.pcaec386             | 0.003366626  | 0.011867528 | 0.777080948 |
| pcaac425.methionine     | -0.008625209 | 0.030412923 | 0.777142453 |
| pcaac405.c141oh         | -0.022497947 | 0.079344504 | 0.777185112 |

|                                 |              |             |             |
|---------------------------------|--------------|-------------|-------------|
| pcaec360.serine                 | 0.016429381  | 0.057943765 | 0.777190874 |
| pcaec406.serotonin              | 0.029903753  | 0.105495409 | 0.77725196  |
| pcaec385.pcaac426               | -0.009849577 | 0.034755406 | 0.77730035  |
| pcaac420.c12                    | 0.009568435  | 0.033772267 | 0.777357492 |
| lysopcac170.ornithine           | -0.006368841 | 0.022480041 | 0.777366161 |
| pcaec424.pcaec422               | 0.013051886  | 0.046078347 | 0.777409545 |
| pcaec381.pcaec401               | -0.014532767 | 0.051338607 | 0.777545264 |
| pcaec444.pcaac384               | -0.014619526 | 0.051645146 | 0.777545489 |
| pcaac365.smc161                 | -0.012682492 | 0.044814546 | 0.777604411 |
| pcaac365.smohc241               | -0.014068524 | 0.049714805 | 0.777615783 |
| pcaec385.pcaac320               | 0.01294382   | 0.045743523 | 0.777630707 |
| pcaec380.c8                     | 0.009995948  | 0.035340822 | 0.777723142 |
| isoleucine.smohc141             | -0.003678629 | 0.013006882 | 0.777740338 |
| c182.pcaec386                   | -0.004079849 | 0.014427782 | 0.777774366 |
| pcaec364.smc261                 | -0.004055695 | 0.01434673  | 0.777840183 |
| pcaec380.methioninesulfoxide    | 0.003838852  | 0.013586636 | 0.777951182 |
| smc240.tyrosine                 | 0.014418991  | 0.05104216  | 0.777992779 |
| glutamicacid.smc260             | 0.015083745  | 0.053397026 | 0.777999602 |
| alphaaminoadipicacid.tryptophan | -0.002498592 | 0.008849616 | 0.778109697 |
| pcaec443.c101                   | 0.00757917   | 0.026845497 | 0.778119943 |
| isoleucine.c4                   | 0.00834674   | 0.029565241 | 0.778127291 |
| pcaec425.lysopcac160            | -0.006395712 | 0.022662541 | 0.778204466 |
| pcaac342.c12                    | 0.009794584  | 0.034709931 | 0.778228332 |
| pcaec403.methionine             | -0.007528748 | 0.026684089 | 0.77825909  |
| pcaac321.prolinr                | -0.01116925  | 0.039598174 | 0.778319491 |
| c12.transhydroxyproline         | -0.006216837 | 0.022041846 | 0.778333064 |
| lysopcac280.lysopcac140         | 0.000311186  | 0.001103621 | 0.778393589 |
| c141oh.smc241                   | -0.004257473 | 0.015100468 | 0.778412558 |
| alanine.c142                    | 0.007180648  | 0.025469534 | 0.778421959 |
| alphaaminoadipicacid.threonine  | -0.012968146 | 0.046015388 | 0.778505306 |
| pcaec420.pcaec423               | -0.003205607 | 0.011374662 | 0.778506795 |
| pcaac403.pcaec425               | -0.001703845 | 0.006046109 | 0.778515629 |
| pcaec363.pcaac381               | 0.007365924  | 0.026138501 | 0.778519331 |
| pcaec444.h1                     | 0.000837096  | 0.002971502 | 0.778592439 |
| pcaec360.threonine              | 0.008153636  | 0.028953572 | 0.778666953 |
| lysopcac182.pcaac384            | -0.009980886 | 0.03544272  | 0.778670477 |
| pcaec422.lysopcac181            | 0.017880203  | 0.063496991 | 0.778681762 |
| pcaec363.pcaec421               | -0.000735539 | 0.002612379 | 0.778706568 |
| pcaac323.ornithine              | -0.010064535 | 0.035758923 | 0.77878595  |
| pcaec365.c3                     | -0.004986534 | 0.017720169 | 0.778824833 |
| pcaec425.pcaec420               | 0.007339641  | 0.026086632 | 0.778861552 |
| pcaec401.smc180                 | 0.001408735  | 0.005010855 | 0.779029668 |
| pcaac385.c101                   | -0.001331125 | 0.004736355 | 0.779100532 |
| pcaec423.serotonin              | -0.020866924 | 0.074259065 | 0.779133033 |
| pcaac363.pcaac364               | -0.021596635 | 0.076856047 | 0.779133482 |

|                                    |              |             |             |
|------------------------------------|--------------|-------------|-------------|
| pcaac421.smc180                    | -0.00202698  | 0.007213872 | 0.779146829 |
| pcaec425.methionine                | 0.007841858  | 0.027924573 | 0.779269927 |
| lysopcac161.pcaec362               | 0.005828044  | 0.020754012 | 0.779275726 |
| pcaac426.alanine                   | -0.004591157 | 0.016354739 | 0.779346107 |
| pcaec422.pcaec403                  | 0.009463988  | 0.033720215 | 0.77939294  |
| smc241.pcaec322                    | 0.018246595  | 0.065024976 | 0.779433601 |
| pcaac422.pcaac426                  | 0.018177237  | 0.064806581 | 0.779528977 |
| prolinr.pcaac404                   | 0.001505313  | 0.005367979 | 0.77957489  |
| smc240.pcaec445                    | -0.022324484 | 0.079610787 | 0.77957804  |
| pcaac365.serotonin                 | -0.026706668 | 0.095238412 | 0.779578997 |
| c182.pcaac380                      | 0.011408522  | 0.040687199 | 0.779596782 |
| methionine.prolinr                 | -0.005777149 | 0.020609892 | 0.779662866 |
| c141.acetylorlithoine              | 0.010234971  | 0.036519458 | 0.779700206 |
| pcaac343.asymmetricdimethylarginir | 0.008046943  | 0.028716246 | 0.779729353 |
| pcaec364.c16                       | 0.007919985  | 0.028282888 | 0.779878813 |
| pcaac366.pcaec425                  | -0.000922376 | 0.003294987 | 0.779951152 |
| putrescine.smohe241                | -0.008853507 | 0.031640709 | 0.780042396 |
| pcaac401.lysopcac281               | 0.002963622  | 0.010596576 | 0.780146888 |
| c182.lysopcac281                   | 0.001734915  | 0.006203452 | 0.780152965 |
| pcaec404.histidine                 | -0.017007546 | 0.060822028 | 0.780184607 |
| lysine.smc240                      | 0.01026443   | 0.036750741 | 0.780436882 |
| c3.pcaec425                        | -0.00147435  | 0.005279205 | 0.780454918 |
| pcaec424.ornithine                 | 0.007362735  | 0.02636955  | 0.780502039 |
| lysine.pcaac420                    | 0.014294697  | 0.051198142 | 0.780509758 |
| pcaac366.c182                      | 0.007242421  | 0.025944446 | 0.780549826 |
| pcaac344.pcaac425                  | -0.026883525 | 0.096311932 | 0.780566185 |
| pcaac322.pcaec406                  | 0.00179079   | 0.006417067 | 0.780614475 |
| pcaac366.pcaec422                  | 0.018347162  | 0.06574596  | 0.780618497 |
| pcaec405.pcaec342                  | 0.021838574  | 0.078300869 | 0.780737607 |
| pcaac403.pcaac361                  | -0.011340957 | 0.040664126 | 0.780747165 |
| phenylalanine.pcaec385             | -0.009569984 | 0.034323272 | 0.780804072 |
| pcaac386.lysine                    | -0.020388413 | 0.073124871 | 0.780806152 |
| pcaec380.asymmetricdimethylarginir | 0.007416382  | 0.026614444 | 0.780925898 |
| pcaec383.c51                       | -0.026976092 | 0.096854245 | 0.781031205 |
| pcaec422.pcaec420                  | 0.005289115  | 0.01899243  | 0.781059651 |
| isoleucine.pcaac363                | -0.004571732 | 0.016418365 | 0.781085018 |
| pcaec384.pcaec364                  | -0.005558827 | 0.019965321 | 0.781106596 |
| pcaec446.c162                      | -0.013011862 | 0.046739995 | 0.781134126 |
| c16.pcaac420                       | 0.034231404  | 0.122972009 | 0.781150005 |
| pcaac403.serotonin                 | -0.027552489 | 0.098991649 | 0.781177585 |
| lysopcac160.pcaac360               | -0.005757767 | 0.020709377 | 0.781410739 |
| pcaec340.pcaac343                  | -0.011321555 | 0.040732604 | 0.781471135 |
| arginine.pcaac422                  | 0.011754615  | 0.042292225 | 0.781478997 |
| pcaac365.asymmetricdimethylarginir | -0.005306142 | 0.019092034 | 0.781489379 |
| pcaec362.pcaac300                  | 0.020668262  | 0.074368832 | 0.78149609  |



|                           |              |             |             |
|---------------------------|--------------|-------------|-------------|
| pcaac426.c3               | 0.009439227  | 0.033965219 | 0.781501464 |
| c18.h1                    | 0.001227924  | 0.004425673 | 0.781849106 |
| smc202.lysopcac203        | -0.004291064 | 0.015467987 | 0.781879    |
| pcaac404.pcaac342         | -0.001345416 | 0.004851639 | 0.781958762 |
| smc260.pcaac360           | -0.005875701 | 0.02119119  | 0.781990025 |
| pcaac381.lysopcac280      | -0.001629864 | 0.005879244 | 0.782026476 |
| pcaac384.pcaac342         | -0.001691125 | 0.006100892 | 0.782049674 |
| pcaac361.c142             | -0.011106131 | 0.040066488 | 0.782050084 |
| lysopcac204.pcaec365      | -0.004310771 | 0.015555569 | 0.782105065 |
| pcaec382.pcaec425         | -0.001231251 | 0.004443122 | 0.782110381 |
| phenylalanine.pcaac343    | 0.006371092  | 0.023000354 | 0.782197803 |
| pcaec381.pcaac406         | 0.017347758  | 0.062645589 | 0.782259621 |
| pcaac422.pcaec340         | -0.014976749 | 0.054086692 | 0.782272199 |
| c8.methionine             | 0.008979716  | 0.032429287 | 0.782273134 |
| smc241.glutamicacid       | -0.007538581 | 0.027228838 | 0.782304754 |
| lysopcac182.smohc241      | 0.010329936  | 0.037323866 | 0.782377766 |
| lysopcac281.smohc221      | 0.013549723  | 0.048988605 | 0.782512338 |
| pcaac342.pcaec380         | 0.013282239  | 0.048050084 | 0.782638326 |
| pcaec404.smc202           | -0.016677252 | 0.060345452 | 0.782685728 |
| acetylmethionine.pcaec386 | 0.001879587  | 0.006803158 | 0.782748221 |
| pcaac401.c2               | 0.019601264  | 0.070946888 | 0.782748736 |
| c8.tyrosine               | 0.020102509  | 0.072771763 | 0.782779628 |
| pcaac365.smc260           | -0.007368045 | 0.026679661 | 0.782835879 |
| lysopcac170.pcaac320      | -0.00756706  | 0.027400741 | 0.782839345 |
| pcaec401.lysopcac161      | -0.016590723 | 0.060099184 | 0.782921261 |
| pcaec384.smc202           | 0.015329724  | 0.055536648 | 0.782941765 |
| smc181.pcaac380           | 0.015810093  | 0.057323907 | 0.783115136 |
| smc161.lysopcac161        | -0.013564408 | 0.049192889 | 0.783163862 |
| pcaec340.asparticacid     | -0.011728272 | 0.042537849 | 0.783183344 |
| pcaec385.pcaac366         | -0.007073211 | 0.025662196 | 0.783249356 |
| phenylalanine.lysopcac280 | 0.005254199  | 0.019063769 | 0.783261549 |
| c12.putrescine            | 0.007515453  | 0.027268519 | 0.78326356  |
| pcaac341.c182             | 0.005959762  | 0.021625239 | 0.783276011 |
| pcaac300.pcaac342         | -0.001211573 | 0.00439792  | 0.783356602 |
| pcaec385.creatinine       | 0.003876274  | 0.014071129 | 0.783364756 |
| pcaac320.pcaec360         | 0.001530892  | 0.005557448 | 0.783372711 |
| smc160.pcaac366           | 0.005337243  | 0.019379512 | 0.783418925 |
| c101.kynurenine           | 0.001149812  | 0.004175737 | 0.78345803  |
| pcaac344.pcaac381         | 0.011563649  | 0.042007679 | 0.783519966 |
| pcaac424.pcaac420         | -0.01826678  | 0.066381198 | 0.783592517 |
| glutamicacid.c162         | -0.021826102 | 0.079324319 | 0.783615381 |
| pcaac363.isoleucine       | 0.005908058  | 0.021475117 | 0.783644834 |
| pcaac405.pcaec421         | 0.000241832  | 0.000879346 | 0.783719993 |
| lysine.pcaac362           | -0.00190531  | 0.006930915 | 0.783807038 |
| pcaec405.pcaec384         | -0.008857397 | 0.032226221 | 0.783845044 |

|                                 |              |             |             |
|---------------------------------|--------------|-------------|-------------|
| c14.pcaec341                    | 0.015642068  | 0.056932951 | 0.783925718 |
| pcaec343.lysopcac170            | -0.002193928 | 0.00798737  | 0.78397997  |
| serotonin.pcaac426              | -0.015029064 | 0.054726989 | 0.784022745 |
| pcaec300.pcaec423               | 0.001748373  | 0.00636757  | 0.784056679 |
| pcaec381.pcaec365               | -0.005277156 | 0.019222684 | 0.784092773 |
| pcaec365.pcaac240               | -0.004433702 | 0.016152467 | 0.784121045 |
| c8.alanine                      | 0.008396193  | 0.030609906 | 0.784269864 |
| pcaec406.phenylalanine          | 0.006021887  | 0.021959472 | 0.784322981 |
| serine.lysopcac204              | -0.006486237 | 0.023654973 | 0.784342539 |
| pcaec365.pcaac361               | 0.024461009  | 0.089214931 | 0.784358766 |
| pcaec404.pcaac384               | 0.010511851  | 0.038342441 | 0.784376871 |
| pcaac381.c51                    | -0.010320909 | 0.037646764 | 0.784381285 |
| arginine.pcaec384               | 0.002792444  | 0.010186505 | 0.784396291 |
| pcaec365.pcaac420               | 0.013677137  | 0.049898961 | 0.784423202 |
| lysopcac203.ornithine           | -0.010183727 | 0.037179046 | 0.784566026 |
| pcaac405.c8                     | 0.009202072  | 0.033615142 | 0.784690696 |
| pcaec385.pcaac240               | -0.003922597 | 0.014330928 | 0.784715522 |
| pcaec423.methionine             | 0.01250889   | 0.045727863 | 0.784841883 |
| c14.pcaec386                    | -0.000662534 | 0.002422046 | 0.784847688 |
| smc161.methioninesulfoxide      | 0.002012261  | 0.007361086 | 0.784984601 |
| methionine.pcaac343             | -0.00585328  | 0.02141212  | 0.784985896 |
| kynurenine.c182                 | 0.014367124  | 0.052557211 | 0.784986928 |
| asparagine.pcaec382             | -0.003586619 | 0.013120749 | 0.784992198 |
| leucine.c14                     | 0.00825216   | 0.030190574 | 0.785006847 |
| c141.threonine                  | 0.005459721  | 0.019974449 | 0.785007168 |
| pcaac401.pcaac381               | 0.020606491  | 0.075403266 | 0.785046615 |
| pcaec365.serotonin              | 0.019250162  | 0.07046836  | 0.785130411 |
| smohc241.pcaac343               | 0.00552015   | 0.020214411 | 0.785202996 |
| lysine.c3                       | -0.008434115 | 0.030894826 | 0.785268589 |
| pcaec301.isoleucine             | -0.003742623 | 0.013715585 | 0.785361135 |
| pcaec402.pcaec365               | -0.005787333 | 0.021209176 | 0.785364549 |
| c142.pcaec386                   | -0.001071942 | 0.003928582 | 0.785373724 |
| pcaec404.pcaec382               | 0.014261477  | 0.05227997  | 0.78542504  |
| c12.pcaec340                    | -0.007459774 | 0.027351077 | 0.785462588 |
| pcaac420.c102                   | -0.00628445  | 0.023046799 | 0.785508173 |
| pcaec383.c162                   | -0.022675146 | 0.083158947 | 0.785515645 |
| pcaec380.putrescine             | 0.014061919  | 0.051577052 | 0.785541196 |
| c5.pcaec402                     | -0.019070758 | 0.069950054 | 0.785545125 |
| pcaac360.smc160                 | -0.0190333   | 0.069819209 | 0.785564744 |
| smohc141.pcaec401               | -0.011066453 | 0.040595691 | 0.785569872 |
| pcaac383.glutamicacid           | -0.007734038 | 0.028376506 | 0.785608948 |
| lysopcac280.methioninesulfoxide | 0.004497013  | 0.016499748 | 0.785609207 |
| c3.pcaec401                     | 0.012151666  | 0.044587756 | 0.785622018 |
| lysopcac170.pcaac364            | 0.010485562  | 0.038478812 | 0.785646173 |
| pcaac403.smc240                 | 0.01438323   | 0.05278747  | 0.785667579 |

|                                 |              |             |             |
|---------------------------------|--------------|-------------|-------------|
| glutamicacid.pcaec401           | -0.017242519 | 0.063284835 | 0.785679384 |
| pcaac344.pcaac420               | 0.018469063  | 0.067804877 | 0.785735748 |
| methionine.pcaec403             | 0.00916595   | 0.033651889 | 0.785743393 |
| pcaac362.serotonin              | 0.01914179   | 0.070309764 | 0.785840153 |
| smc180.c182                     | -0.005025569 | 0.018467495 | 0.785931372 |
| pcaec402.c18                    | 0.008669463  | 0.031874446 | 0.786040795 |
| pcaec425.c101                   | 0.005087528  | 0.018705074 | 0.786041866 |
| pcaac281.pcaec403               | -0.00620979  | 0.022855322 | 0.786261719 |
| pcaac403.pcaac402               | 0.063183192  | 0.23255354  | 0.786267002 |
| prolinr.smc240                  | 0.010705967  | 0.039404817 | 0.786267979 |
| pcaec401.pcaec343               | -0.017324723 | 0.063766847 | 0.786270486 |
| pcaec341.smohc241               | 0.020985822  | 0.077262749 | 0.786325934 |
| smc202.pcaec425                 | -0.000983198 | 0.003620103 | 0.786343003 |
| smc180.pcaac363                 | 0.001352404  | 0.004982293 | 0.786459571 |
| c5.smohc141                     | -0.004165397 | 0.015345836 | 0.786465063 |
| asparticacid.smc160             | -0.009985244 | 0.036797335 | 0.786524309 |
| smohc161.pcaec446               | -0.005670185 | 0.020897431 | 0.786542517 |
| pcaac360.pcaec363               | -0.008541625 | 0.031493822 | 0.786633214 |
| pcaac421.pcaac322               | 0.015774746  | 0.058172406 | 0.786666666 |
| pcaec380.pcaac364               | 0.013672136  | 0.050424427 | 0.786690598 |
| acetylorithoine.pcaec340        | -0.017117881 | 0.063139042 | 0.786711384 |
| pcaac323.valine                 | 0.010262091  | 0.037854236 | 0.786726068 |
| pcaac366.histidine              | -0.01492254  | 0.055048788 | 0.786738703 |
| pcaac366.h1                     | 0.000419424  | 0.001547926 | 0.786830405 |
| lysopcac204.transhydroxyproline | -0.010333852 | 0.03814331  | 0.786858984 |
| pcaac320.pcaec341               | 0.017032912  | 0.062886904 | 0.786914116 |
| methionine.pcaec362             | -0.003098081 | 0.011439918 | 0.78694227  |
| lysopcac204.taurine             | -0.012952984 | 0.047850271 | 0.787030542 |
| pcaec383.smc180                 | 0.000737805  | 0.002725592 | 0.787032704 |
| c141.creatinine                 | 0.009772683  | 0.036119457 | 0.78713234  |
| smc180.pcaac365                 | -0.014104143 | 0.052161279 | 0.787263396 |
| pcaec443.c102                   | -0.008366281 | 0.030949847 | 0.787322908 |
| c8.smc240                       | 0.007726817  | 0.028587041 | 0.787343227 |
| pcaac320.pcaac363               | 0.002310965  | 0.008553994 | 0.787442103 |
| c18.pcaac344                    | -0.012135998 | 0.044923792 | 0.787454185 |
| c51.c101                        | -0.001534016 | 0.005679943 | 0.787508287 |
| pcaec364.pcaac426               | -0.006266371 | 0.023202568 | 0.787511024 |
| asparticacid.pcaac341           | 0.002129996  | 0.00788838  | 0.787553589 |
| c142.pcaac425                   | -0.013502983 | 0.050015524 | 0.78758509  |
| lysopcac170.pcaac362            | 0.004024137  | 0.014908368 | 0.787624364 |
| citruiline.pcaec445             | -0.014375542 | 0.053263119 | 0.78764582  |
| pcaec321.pcaac405               | -0.00953693  | 0.035340512 | 0.787675343 |
| histidine.pcaac363              | -0.003524267 | 0.013067556 | 0.787799963 |
| phenylalanine.creatinine        | 0.003962713  | 0.014694054 | 0.787811162 |
| pcaac380.isoleucine             | 0.007865652  | 0.029172156 | 0.78785156  |

|                                    |              |             |             |
|------------------------------------|--------------|-------------|-------------|
| pcaec382.pcaac364                  | 0.01517699   | 0.056309355 | 0.787928358 |
| spermidine.alanine                 | -0.018543097 | 0.06885491  | 0.788098755 |
| pcaec386.pcaac420                  | 0.014793673  | 0.054958697 | 0.788197662 |
| c0.alphaaminoadipicacid            | 0.002294478  | 0.008525302 | 0.788228829 |
| pcaec423.pcaec384                  | -0.006839379 | 0.025413601 | 0.788240092 |
| lysopcac140.serotonin              | 0.017530664  | 0.065151683 | 0.788277068 |
| c51dc.alphaaminoadipicacid         | 0.001937277  | 0.007199823 | 0.788278439 |
| pcaac385.methioninesulfoxide       | 0.003786584  | 0.014074924 | 0.78831092  |
| c2.asparticacid                    | 0.006500285  | 0.024171021 | 0.788389009 |
| smohc141.lysopcac203               | 0.002803515  | 0.010426493 | 0.78842361  |
| smohc222.pcaac424                  | -0.003845994 | 0.014304434 | 0.788436319 |
| pcaac322.threonine                 | 0.007017734  | 0.026115636 | 0.788551156 |
| smc260.pcaec341                    | -0.012969861 | 0.048266814 | 0.78855572  |
| pcaac424.c3                        | -0.010749614 | 0.04002002  | 0.788637016 |
| lysopcac160.lysopcac203            | 0.003741024  | 0.013927966 | 0.788643073 |
| pcaac383.pcaac426                  | 0.011253433  | 0.041898474 | 0.788650675 |
| pcaac365.taurine                   | 0.004184927  | 0.015590964 | 0.788779813 |
| pcaac403.smohc141                  | -0.004501691 | 0.016773443 | 0.788808944 |
| pcaac363.methioninesulfoxide       | 0.004175548  | 0.015563453 | 0.788878233 |
| smc160.pcaec423                    | 0.003990243  | 0.014874359 | 0.788900264 |
| smc261.pcaec321                    | -0.013248606 | 0.04938694  | 0.788901678 |
| citruline.c141oh                   | 0.024860745  | 0.092679705 | 0.788915233 |
| pcaec364.c101                      | -0.001818086 | 0.006782437 | 0.789057948 |
| serotonin.pcaec423                 | -0.004580556 | 0.017091478 | 0.789100638 |
| asparagine.pcaec362                | -0.003978068 | 0.014843677 | 0.789104356 |
| pcaac384.serine                    | -0.009970252 | 0.037215353 | 0.78917387  |
| pcaec343.smc241                    | -0.004214279 | 0.015733371 | 0.789212982 |
| glutamicacid.pcaac385              | -0.005938086 | 0.022170321 | 0.789225757 |
| smohc222.pcaac403                  | -0.001272371 | 0.004751058 | 0.789249898 |
| asparticacid.pcaec301              | 0.016691323  | 0.062356532 | 0.789351599 |
| asymmetricdimethylarginine.pcaec34 | -0.017027839 | 0.063627081 | 0.789394806 |
| glutamine.pcaac360                 | -0.007844497 | 0.029315099 | 0.78941555  |
| glutamine.pcaac364                 | -0.010938605 | 0.040880417 | 0.78942837  |
| pcaac360.threonine                 | 0.00642056   | 0.023996416 | 0.78943789  |
| lysopcac281.pcaec386               | 0.005762073  | 0.02154504  | 0.789530192 |
| pcaec404.asymmetricdimethylarginir | 0.004472034  | 0.016733097 | 0.789673349 |
| pcaec443.valine                    | 0.00969909   | 0.03629948  | 0.78971975  |
| putrescine.smc202                  | -0.007462266 | 0.027929406 | 0.789729956 |
| pcaac366.pcaac426                  | 0.023219106  | 0.086926118 | 0.789783746 |
| smc202.asparagine                  | 0.003526706  | 0.013208945 | 0.789875439 |
| c10.pcaec385                       | -0.007916643 | 0.029656286 | 0.789911723 |
| pcaac300.lysine                    | 0.016804372  | 0.062950482 | 0.789912238 |
| pcaec363.pcaac365                  | 0.009396355  | 0.035209401 | 0.78997006  |
| asparagine.taurine                 | -0.007413256 | 0.027778939 | 0.789973577 |
| smc202.pcaec380                    | 0.012500734  | 0.04685261  | 0.790016826 |

|                                   |              |             |             |
|-----------------------------------|--------------|-------------|-------------|
| phenylalanine.c142                | 0.012722088  | 0.047688999 | 0.79004586  |
| c182.pcaac321                     | 0.006278223  | 0.023536492 | 0.790067193 |
| c3.smc260                         | -0.007654849 | 0.028705338 | 0.790124303 |
| pcaec402.pcaec340                 | -0.01099419  | 0.041236591 | 0.790168404 |
| pcaec385.methionine               | -0.005005841 | 0.018779984 | 0.790214946 |
| pcaec421.pcaac360                 | -0.008057645 | 0.030237918 | 0.790274176 |
| pcaac341.pcaec340                 | 0.01876038   | 0.070406931 | 0.790288327 |
| pcaac403.serine                   | -0.015159    | 0.056919747 | 0.790391384 |
| smohc161.pcaac383                 | 0.001017475  | 0.003822165 | 0.790482474 |
| pcaac386.glutamicacid             | -0.007862512 | 0.029543507 | 0.790536632 |
| pcaec381.pcaec420                 | 0.008230274  | 0.030926673 | 0.790545195 |
| pcaec425.smc241                   | 0.013028811  | 0.048962006 | 0.790561921 |
| pcaec425.valine                   | 0.011704308  | 0.043996605 | 0.790617948 |
| pcaec343.smc202                   | -0.014292088 | 0.053740531 | 0.790680481 |
| c8.pcaec402                       | -0.015118364 | 0.05684906  | 0.790686234 |
| glutamine.pcaec420                | -0.005936913 | 0.022326893 | 0.790709365 |
| asparagine.pcaac343               | -0.004513762 | 0.016977268 | 0.790738303 |
| pcaec423.threonine                | 0.004483257  | 0.016864082 | 0.79075709  |
| pcaac365.pcaac343                 | -0.006520278 | 0.024528932 | 0.790777526 |
| pcaac381.pcaec443                 | -0.024543274 | 0.092346612 | 0.790813254 |
| pcaac365.smc202                   | 0.007576706  | 0.028508143 | 0.790813276 |
| pcaac385.lysine                   | -0.015316684 | 0.057638654 | 0.790841758 |
| pcaec446.c12                      | 0.008666508  | 0.032624589 | 0.790913161 |
| glycine.pcaac323                  | -0.020354041 | 0.076625281 | 0.790922804 |
| pcaac363.pcaac360                 | -0.005390315 | 0.020295191 | 0.790949858 |
| prolinr.pcaac383                  | -0.005231653 | 0.019702464 | 0.790998089 |
| pcaac381.pcaac240                 | -0.005221717 | 0.019669288 | 0.791042115 |
| pcaac406.pcaac342                 | -0.00258181  | 0.009725815 | 0.791054569 |
| pcaac403.pcaec423                 | 0.012541309  | 0.047245548 | 0.791062195 |
| methionine.c102                   | 0.004462802  | 0.016814735 | 0.79109245  |
| lysopcac140.c3                    | 0.009212438  | 0.03471455  | 0.791118064 |
| lysopcac140.smohc241              | 0.013348077  | 0.050309327 | 0.791161675 |
| glutamicacid.pcaec365             | 0.008616042  | 0.032482162 | 0.791212061 |
| methioninesulfoxide.asymmetricdim | -0.005898647 | 0.022238161 | 0.791216436 |
| pcaac281.taurine                  | 0.008305251  | 0.031321439 | 0.791283336 |
| c5.pcaac424                       | 0.002383845  | 0.008991693 | 0.791318286 |
| lysopcac160.smohc141              | -0.004676747 | 0.017641646 | 0.791333225 |
| alanine.smohc141                  | -0.009109196 | 0.034364012 | 0.791346627 |
| smc241.pcaac403                   | 0.001379563  | 0.005205357 | 0.791386633 |
| pcaec343.c182                     | 0.008447172  | 0.031895593 | 0.791532126 |
| smohc241.pcaac380                 | 0.007879443  | 0.029752698 | 0.791537509 |
| pcaec380.pcaac380                 | 0.015168658  | 0.057277814 | 0.791541482 |
| pcaac362.tyrosine                 | 0.010276027  | 0.038806781 | 0.791561688 |
| pcaec420.c101                     | -0.001862169 | 0.0070325   | 0.791565603 |
| pcaac385.pcaec402                 | -0.005848903 | 0.022092074 | 0.791599054 |

|                             |              |             |             |
|-----------------------------|--------------|-------------|-------------|
| pcaec362.pcaac366           | 0.005352772  | 0.020235617 | 0.791775017 |
| pcaac421.pcaac383           | 0.001213054  | 0.004585905 | 0.791778381 |
| c181.pcaec446               | -0.011390144 | 0.043071786 | 0.791833992 |
| pcaac426.c12                | -0.011040905 | 0.04175199  | 0.791838145 |
| pcaec424.pcaac364           | 0.009118362  | 0.034482767 | 0.791844108 |
| pcaac343.pcaec406           | 0.001384698  | 0.005236892 | 0.791859623 |
| pcaac422.kynurenine         | -0.002647192 | 0.010012675 | 0.791881269 |
| pcaec383.pcaac360           | -0.014374803 | 0.054399888 | 0.791989586 |
| pcaac385.pcaac380           | -0.010252661 | 0.038808128 | 0.792031676 |
| pcaec301.smc260             | -0.007670801 | 0.029045079 | 0.792099842 |
| smohc141.lysine             | 0.012502712  | 0.047354262 | 0.792157349 |
| lysine.pcaac363             | -0.005436597 | 0.020593903 | 0.792183835 |
| pcaec380.c182               | 0.007654168  | 0.029033641 | 0.792460382 |
| ornithine.pcaec444          | -0.016173904 | 0.06136821  | 0.792518762 |
| pcaac342.isoleucine         | -0.005810587 | 0.0220512   | 0.792557774 |
| pcaec382.methionine         | -0.006243307 | 0.023702165 | 0.792632968 |
| c16.pcaec365                | -0.006265893 | 0.02379025  | 0.792652872 |
| pcaec380.leucine            | -0.01052982  | 0.039981426 | 0.792662809 |
| kynurenine.smc260           | -0.005010599 | 0.019025422 | 0.792666224 |
| c51.pcaac381                | -0.010938843 | 0.041556905 | 0.792772141 |
| pcaec360.pcaec386           | -0.001005187 | 0.0038193   | 0.792802544 |
| pcaac402.smc261             | 0.016982331  | 0.064527459 | 0.792807309 |
| c14.pcaec403                | 0.005455448  | 0.020734108 | 0.792857509 |
| pcaec383.pcaec406           | -0.011827034 | 0.044954596 | 0.792877675 |
| smc181.pcaec421             | -0.000299328 | 0.001137774 | 0.79288262  |
| pcaec385.isoleucine         | -0.004438133 | 0.016871603 | 0.792904591 |
| pcaac322.valine             | 0.014259438  | 0.054209483 | 0.792912429 |
| smc181.lysine               | 0.011460761  | 0.043571236 | 0.792918749 |
| lysopcac180.pcaac403        | -0.003562327 | 0.013544008 | 0.792931351 |
| lysine.c14                  | -0.008904175 | 0.033856473 | 0.792947444 |
| lysopcac140.threonine       | 0.006325265  | 0.02405712  | 0.793001904 |
| pcaec361.pcaac363           | -0.003510885 | 0.013353149 | 0.793002894 |
| c12.c51                     | 0.004825318  | 0.018357525 | 0.793059281 |
| smc180.pcaec421             | 0.000353022  | 0.001343594 | 0.793142328 |
| smc240.lysopcac140          | 0.000219194  | 0.000834367 | 0.793171414 |
| pcaec343.pcaec405           | -0.014903048 | 0.056734063 | 0.793189881 |
| smc261.c12                  | 0.009545081  | 0.036344592 | 0.793232393 |
| pcaac425.threonine          | 0.004031258  | 0.015350089 | 0.793237114 |
| lysopcac182.smc161          | -0.012370649 | 0.047126052 | 0.793329326 |
| c141.pcaec340               | -0.006765455 | 0.025776843 | 0.793359151 |
| smc180.alphaaminoadipicacid | -0.003952756 | 0.015060271 | 0.793359166 |
| ornithine.pcaac360          | -0.009891915 | 0.037690716 | 0.793369031 |
| pcaec424.pcaec446           | -0.008849646 | 0.033732961 | 0.793450177 |
| pcaac366.c4                 | -0.003532461 | 0.01346752  | 0.793488134 |
| pcaac404.c18                | 0.009870141  | 0.037630954 | 0.793493523 |

|                               |              |             |             |
|-------------------------------|--------------|-------------|-------------|
| pcaec444.threonine            | 0.005326211  | 0.020310026 | 0.793526145 |
| lysopcac180.pcaac383          | -0.000964035 | 0.003676123 | 0.793528505 |
| pcaac381.pcaac364             | 0.011943066  | 0.045559231 | 0.793604387 |
| c51.h1                        | -0.000666577 | 0.002543009 | 0.793621583 |
| pcaac425.smc181               | 0.002166868  | 0.008267892 | 0.793651695 |
| pcaac361.ornithine            | -0.004463268 | 0.017032366 | 0.793679354 |
| smc202.smc180                 | 0.006927996  | 0.026440672 | 0.793699242 |
| pcaec341.pcaec342             | -0.029421473 | 0.112313748 | 0.793747356 |
| lysopcac180.pcaec446          | -0.008053649 | 0.03074875  | 0.793778108 |
| c141oh.pcaec445               | 0.017436422  | 0.066605206 | 0.793878325 |
| glutamicacid.c51dc            | 0.035444353  | 0.135395097 | 0.793880679 |
| pcaec443.ornithine            | 0.01472727   | 0.056257413 | 0.793881436 |
| pcaec383.pcaec365             | -0.004824653 | 0.018431144 | 0.793894761 |
| pcaec363.smc180               | -0.002498575 | 0.00954624  | 0.79391966  |
| pcaec301.pcaec420             | -0.004246354 | 0.016237843 | 0.794092175 |
| asymmetricdimethylarginine.h1 | 0.000242102  | 0.000925962 | 0.794130343 |
| pcaec446.isoleucine           | -0.005565116 | 0.021286052 | 0.794142557 |
| pcaec425.pcaac320             | -0.015629147 | 0.059793255 | 0.794187039 |
| pcaec423.pcaec322             | -0.016896655 | 0.064647457 | 0.794202688 |
| prolinr.glutamine             | -0.004826227 | 0.018466349 | 0.794213174 |
| pcaec322.threonine            | -0.010967681 | 0.041985082 | 0.794308937 |
| smc180.lysopcac281            | 0.005278398  | 0.020210872 | 0.794356499 |
| pcaec322.pcaec424             | -0.013021775 | 0.049864637 | 0.794374794 |
| lysopcac281.lysopcac182       | -0.003174675 | 0.012157996 | 0.794393428 |
| lysopcac160.c10               | 0.008079407  | 0.030951303 | 0.794456653 |
| pcaec443.c142                 | 0.010448831  | 0.040033182 | 0.794481162 |
| alanine.pcaec365              | 0.003775599  | 0.014465876 | 0.794484136 |
| c51.putrescine                | 0.003739324  | 0.014327903 | 0.794498337 |
| pcaec340.c142                 | 0.011017488  | 0.042222218 | 0.794530198 |
| pcaac343.c141oh               | 0.014860664  | 0.056958771 | 0.79455977  |
| pcaac406.pcaec421             | 0.000564643  | 0.002165143 | 0.794647732 |
| c51.pcaac363                  | 0.00150934   | 0.00578839  | 0.794674539 |
| smohc221.lysopcac140          | -0.00024621  | 0.00094486  | 0.794808869 |
| pcaac404.threonine            | 0.004450194  | 0.017086926 | 0.794912037 |
| lysopcac170.pcaac380          | 0.014071456  | 0.054028784 | 0.794912586 |
| pcaec385.c3                   | -0.003890228 | 0.014937381 | 0.794918688 |
| serine.smohc241               | -0.015898226 | 0.061055625 | 0.79495453  |
| lysopcac181.pcaec321          | 0.011999722  | 0.046092521 | 0.794992478 |
| pcaec364.pcaec423             | 0.001673076  | 0.006428426 | 0.795052291 |
| serine.pcaac421               | -0.009974602 | 0.038339684 | 0.795127936 |
| c51dc.pcaac360                | 0.007118418  | 0.02736314  | 0.795141551 |
| smohc141.pcaac386             | 0.002278944  | 0.008760965 | 0.795158059 |
| pcaac424.glutamicacid         | 0.018883163  | 0.072597437 | 0.795171091 |
| pcaac401.pcaac404             | 0.001596862  | 0.006141211 | 0.795235659 |
| pcaec343.lysopcac140          | 0.00020054   | 0.000771602 | 0.79533073  |

|                                   |              |             |             |
|-----------------------------------|--------------|-------------|-------------|
| c141.pcaec443                     | 0.022314779  | 0.085891332 | 0.795406184 |
| asymmetricdimethylarginine.smohc1 | -0.012833728 | 0.04940699  | 0.795442471 |
| pcaec402.asparticacid             | 0.010291398  | 0.039626257 | 0.795476136 |
| pcaac383.c3                       | -0.010683967 | 0.041148357 | 0.795527357 |
| smohc222.transhydroxyproline      | 0.007684897  | 0.029600791 | 0.795548207 |
| pcaac364.h1                       | 0.000243909  | 0.000939511 | 0.795552642 |
| pcaec300.pcaac364                 | -0.01191914  | 0.045912396 | 0.795557303 |
| c4.pcaec420                       | -0.009490281 | 0.036565063 | 0.795604353 |
| pcaec384.smc260                   | 0.007429552  | 0.028642741 | 0.795726101 |
| smc160.pcaac383                   | -0.000639578 | 0.002466151 | 0.795760339 |
| pcaec422.pcaec404                 | -0.004000524 | 0.015429693 | 0.795812706 |
| pcaec404.pcaec424                 | 0.009670908  | 0.037305174 | 0.795840972 |
| pcaec403.pcaec425                 | -0.001439328 | 0.005553686 | 0.795895978 |
| c4.glycine                        | 0.006455629  | 0.024917898 | 0.795965471 |
| smohc161.c3                       | -0.003630342 | 0.014013664 | 0.795979852 |
| h1.threonine                      | 0.005800192  | 0.022394081 | 0.796019696 |
| c0.acetylornithoine               | -0.020617054 | 0.079609381 | 0.796041168 |
| pcaac281.alanine                  | -0.005622054 | 0.021715742 | 0.796106382 |
| lysine.pcaac403                   | -0.001912415 | 0.007388897 | 0.796160391 |
| pcaac300.valine                   | -0.010341689 | 0.03996784  | 0.796216284 |
| pcaac240.pcaec365                 | -0.003356785 | 0.012975325 | 0.796250907 |
| pcaec420.c162                     | -0.014327332 | 0.055383847 | 0.796261517 |
| arginine.lysopcac140              | 0.000234779  | 0.000907619 | 0.796273725 |
| pcaac381.pcaec361                 | 0.006273853  | 0.024259058 | 0.796317383 |
| pcaac362.pcaac322                 | -0.015873226 | 0.061401413 | 0.796396955 |
| pcaec443.pcaac420                 | -0.020785935 | 0.080466571 | 0.796549432 |
| phenylalanine.pcaac424            | 0.004483907  | 0.017359241 | 0.796562346 |
| alanine.pcaac366                  | -0.002318391 | 0.008975591 | 0.796563361 |
| smc240.lysopcac161                | 0.014660548  | 0.056777939 | 0.796633464 |
| smc202.pcaac386                   | 0.001668046  | 0.006461195 | 0.796667961 |
| c5.lysopcac281                    | -0.003974606 | 0.015403875 | 0.796773751 |
| pcaac405.pcaac342                 | -0.000953894 | 0.003697631 | 0.79681385  |
| pcaec403.pcaec341                 | -0.006806133 | 0.026388533 | 0.796855593 |
| pcaac342.pcaec363                 | 0.00686736   | 0.026627151 | 0.796864788 |
| c102.glutamicacid                 | 0.007664196  | 0.029720145 | 0.796887405 |
| c141.alphaaminoadipicacid         | 0.002186469  | 0.008479973 | 0.796917986 |
| pcaec421.kynurenine               | 0.002403976  | 0.009324013 | 0.796927843 |
| smc241.phenylalanine              | -0.007280407 | 0.028237804 | 0.796928975 |
| pcaec301.methionine               | -0.006436266 | 0.024968038 | 0.796963352 |
| pcaac341.pcaac406                 | 0.009487525  | 0.036805775 | 0.796969114 |
| pcaec386.transhydroxyproline      | 0.012585817  | 0.048834321 | 0.797006003 |
| lysopcac281.pcaac366              | -0.008788578 | 0.034102338 | 0.797015974 |
| lysopcac204.pcaac360              | -0.006282478 | 0.024379064 | 0.797025359 |
| pcaac426.pcaac343                 | 0.008029884  | 0.03116616  | 0.797065562 |
| pcaec384.pcaac406                 | 0.008946603  | 0.034759715 | 0.797268358 |



|                                    |              |             |             |
|------------------------------------|--------------|-------------|-------------|
| pcaec445.taurine                   | -0.005567227 | 0.021630534 | 0.797273028 |
| pcaac321.serine                    | 0.014791508  | 0.057476919 | 0.797297105 |
| smc241.ornithine                   | -0.006607634 | 0.025680563 | 0.797332501 |
| pcaac380.smc260                    | -0.009923186 | 0.03858652  | 0.797435565 |
| lysopcac280.pcaec385               | -0.010604471 | 0.041235838 | 0.797436177 |
| c2.pcaac360                        | -0.006274875 | 0.024411428 | 0.797528435 |
| lysopcac181.pcaec301               | 0.006487535  | 0.025243136 | 0.797562862 |
| pcaac421.phenylalanine             | -0.009019042 | 0.035102565 | 0.797615192 |
| c51dc.phenylalanine                | -0.013317514 | 0.0518335   | 0.797619277 |
| smohc221.c2                        | 0.011639885  | 0.04530444  | 0.797621413 |
| pcaec443.pcaec421                  | -0.00233096  | 0.009076835 | 0.797716011 |
| smohc241.pcaec425                  | 0.001043751  | 0.004067207 | 0.797852539 |
| pcaec385.pcaac362                  | -0.004120902 | 0.016059479 | 0.797870594 |
| pcaec322.pcaec362                  | 0.009304726  | 0.036279916 | 0.797972344 |
| pcaac420.smc181                    | 0.003713825  | 0.014480609 | 0.797973558 |
| phenylalanine.pcaac360             | -0.006046259 | 0.023577226 | 0.797992021 |
| pcaac425.pcaac342                  | -0.0013021   | 0.005077904 | 0.798007502 |
| pcaec421.smohc141                  | -0.003926538 | 0.015318265 | 0.798080204 |
| pcaac401.asymmetricdimethylarginir | -0.007855186 | 0.030646695 | 0.798092653 |
| pcaac405.c14                       | 0.005117346  | 0.019986045 | 0.798299407 |
| lysopcac170.c4                     | 0.005571381  | 0.021765981 | 0.798359958 |
| c4.c141oh                          | -0.020558473 | 0.080325597 | 0.798381636 |
| c5.acetylornithoine                | 0.023218899  | 0.090724895 | 0.798391508 |
| smohc161.smc260                    | -0.009293032 | 0.036318145 | 0.798428472 |
| pcaec301.pcaac281                  | -0.000447778 | 0.001751038 | 0.798549306 |
| pcaec343.pcaac342                  | 0.001881256  | 0.007361645 | 0.798682863 |
| lysopcac203.c141                   | -0.005336786 | 0.02088626  | 0.798707343 |
| pcaac383.lysine                    | 0.01203189   | 0.047089761 | 0.798712676 |
| pcaac341.smc160                    | 0.016197767  | 0.063396542 | 0.798720737 |
| pcaac426.pcaac344                  | 0.017546063  | 0.068690112 | 0.798767945 |
| pcaec342.smc180                    | -0.001918785 | 0.007515192 | 0.798858206 |
| lysopcac180.lysopcac181            | 0.02179725   | 0.085380643 | 0.798878141 |
| pcaac342.pcaac360                  | -0.0050573   | 0.019810226 | 0.798884039 |
| prolinr.c12                        | -0.005417221 | 0.021230101 | 0.798976787 |
| pcaac425.pcaec380                  | 0.011188251  | 0.043870551 | 0.799083356 |
| acetylornithoine.pcaac425          | 0.01237106   | 0.048531365 | 0.799175979 |
| c14.pcaac420                       | -0.014477104 | 0.056804757 | 0.799215531 |
| pcaac406.pcaac424                  | -0.004856504 | 0.019055973 | 0.799217502 |
| pcaac401.pcaec386                  | -0.00210492  | 0.00826131  | 0.799265433 |
| pcaec382.smc161                    | 0.02284771   | 0.089726023 | 0.799384062 |
| pcaac321.pcaac342                  | -0.002256224 | 0.008862657 | 0.799431953 |
| histidine.pcaec385                 | -0.011457329 | 0.045008273 | 0.799444264 |
| alanine.asparagine                 | 0.003006776  | 0.011811943 | 0.79944938  |
| pcaec401.pcaec402                  | 0.007467132  | 0.029340237 | 0.799489809 |
| smc202.pcaac240                    | -0.001904685 | 0.007484704 | 0.79950865  |

|                                    |              |             |             |
|------------------------------------|--------------|-------------|-------------|
| c14.pcaec404                       | 0.008554792  | 0.033631554 | 0.799592659 |
| pcaec300.lysopcac281               | -0.002858757 | 0.011243637 | 0.799679373 |
| pcaec401.pcaac365                  | -0.012181527 | 0.047932802 | 0.799770291 |
| pcaac300.pcaec406                  | 0.002739806  | 0.010781519 | 0.799783388 |
| pcaec385.putrescine                | -0.012444977 | 0.0489807   | 0.799815323 |
| c141oh.methioninesulfoxide         | 0.004138849  | 0.016289636 | 0.79981574  |
| pcaac421.valine                    | -0.012979789 | 0.05109637  | 0.7998566   |
| pcaec301.pcaec421                  | -0.000702803 | 0.002766838 | 0.799868957 |
| histidine.threonine                | 0.003816821  | 0.015029963 | 0.799916857 |
| pcaec341.methionine                | -0.006752969 | 0.02660101  | 0.79998326  |
| smc260.pcaec421                    | 0.000311726  | 0.001228215 | 0.800027107 |
| creatinine.methionine              | -0.010645728 | 0.041964387 | 0.800119385 |
| lysopcac280.pcaac361               | -0.015310438 | 0.060369058 | 0.800173992 |
| c5.ornithine                       | 0.008328431  | 0.03283986  | 0.800179096 |
| pcaac381.methionine                | -0.012703396 | 0.050112015 | 0.800261883 |
| serotonin.lysopcac204              | -0.008442596 | 0.033304327 | 0.800263055 |
| pcaac426.taurine                   | 0.00361191   | 0.014255178 | 0.800358033 |
| c18.pcaac364                       | -0.009349787 | 0.036947287 | 0.800603132 |
| c141oh.ornithine                   | 0.003859091  | 0.015254852 | 0.800667007 |
| lysopcac161.pcaac360               | -0.006856082 | 0.027102192 | 0.800669415 |
| pcaac341.smohc221                  | 0.011993667  | 0.047414815 | 0.800684547 |
| pcaec421.arginine                  | 0.011136421  | 0.04403828  | 0.800739633 |
| c3.glutamicacid                    | 0.006433924  | 0.025455822 | 0.800841312 |
| pcaac380.transhydroxyproline       | 0.009938176  | 0.039334418 | 0.800910802 |
| smc240.c3                          | 0.0074412    | 0.02947703  | 0.80107885  |
| c182.lysine                        | 0.015256539  | 0.060445712 | 0.801109658 |
| isoleucine.pcaec342                | -0.020122664 | 0.079725759 | 0.801111324 |
| pcaec322.c182                      | -0.012443361 | 0.049321623 | 0.801194885 |
| asymmetricdimethylarginine.alphaan | 0.002006011  | 0.007952196 | 0.80121915  |
| pcaec342.c16                       | -0.011935838 | 0.047316419 | 0.801221459 |
| c141.pcaec386                      | -0.000684963 | 0.002715947 | 0.801264189 |
| pcaac364.transhydroxyproline       | -0.005436799 | 0.021582161 | 0.801486831 |
| smc160.pcaec384                    | -0.021105123 | 0.083787238 | 0.801503973 |
| methioninesulfoxide.pcaec341       | -0.005103794 | 0.020262264 | 0.801506137 |
| pcaac300.pcaec385                  | 0.009972347  | 0.039599289 | 0.801548711 |
| pcaac384.pcaec363                  | -0.006181551 | 0.024549112 | 0.801570317 |
| c8.pcaac424                        | 0.001653917  | 0.006568353 | 0.801572301 |
| c3.c141oh                          | -0.024465671 | 0.097182642 | 0.80161203  |
| pcaec381.pcaec425                  | -0.00081589  | 0.003243054 | 0.801742012 |
| methionine.smc202                  | -0.012171494 | 0.048382514 | 0.801751936 |
| c0.lysopcac281                     | -0.003215011 | 0.012781457 | 0.801775761 |
| c51.pcaec420                       | 0.004698354  | 0.018679297 | 0.801783312 |
| c10.c141oh                         | 0.029166132  | 0.115973613 | 0.801812616 |
| lysopcac170.c5                     | -0.003596153 | 0.014299587 | 0.801814846 |
| pcaec443.pcaac320                  | -0.016306599 | 0.064878174 | 0.801926451 |

|                                    |              |             |             |
|------------------------------------|--------------|-------------|-------------|
| asparticacid.lysopcac182           | -0.011455717 | 0.045587436 | 0.801965578 |
| pcaac381.smc241                    | 0.005955497  | 0.023708207 | 0.802036027 |
| leucine.prolinr                    | -0.010013322 | 0.039872771 | 0.802088459 |
| citruiline.pcaec362                | -0.003625423 | 0.014437609 | 0.802105576 |
| pcaec321.lysopcac203               | 0.002873017  | 0.011442428 | 0.802124929 |
| lysopcac180.pcaec382               | -0.001142858 | 0.004551742 | 0.802127388 |
| glycine.tryptophan                 | 0.002349675  | 0.009358315 | 0.802129345 |
| pcaec443.c12                       | 0.014107447  | 0.05618819  | 0.802132353 |
| pcaac404.c142                      | 0.008691302  | 0.034626989 | 0.802191784 |
| smc202.alphaaminoadipicacid        | 0.002501041  | 0.009964404 | 0.802192094 |
| pcaac320.c16                       | 0.008549831  | 0.034067835 | 0.802217264 |
| pcaec424.methionine                | 0.00799408   | 0.031855318 | 0.802229042 |
| lysopcac170.lysopcac280            | -0.001666441 | 0.006641334 | 0.802252252 |
| lysopcac140.pcaac362               | -0.003132578 | 0.01248741  | 0.802299067 |
| c14.c51                            | 0.006336814  | 0.025263587 | 0.80232291  |
| pcaec382.smc180                    | 0.000553929  | 0.00220852  | 0.802333388 |
| pcaac343.pcaec424                  | -0.004414029 | 0.017600506 | 0.802352308 |
| histidine.pcaec403                 | -0.004833311 | 0.019274432 | 0.802373197 |
| pcaec402.pcaac406                  | 0.014402549  | 0.05745216  | 0.802431153 |
| pcaec445.pcaac344                  | -0.011196347 | 0.044665376 | 0.80244348  |
| smc161.glutamicacid                | 0.008787387  | 0.035063049 | 0.80248591  |
| pcaec406.asymmetricdimethylarginir | 0.003747366  | 0.01495376  | 0.80250123  |
| pcaac343.smc181                    | 0.001809857  | 0.007230605 | 0.802726398 |
| pcaac405.putrescine                | 0.010302391  | 0.041166107 | 0.802758166 |
| smc181.c12                         | 0.013495519  | 0.053948228 | 0.80284079  |
| pcaac366.valine                    | 0.010328633  | 0.041305078 | 0.802917683 |
| c3.acetylornithoine                | 0.013423859  | 0.053695281 | 0.802961279 |
| methioninesulfoxide.methionine     | 0.006617996  | 0.026474362 | 0.802979167 |
| c101.pcaac344                      | -0.011788042 | 0.047171469 | 0.803040782 |
| pcaec445.pcaac364                  | -0.007700702 | 0.030815548 | 0.803041605 |
| pcaac386.acetylornithoine          | -0.006273715 | 0.025111009 | 0.803085921 |
| pcaec342.smc240                    | 0.005723592  | 0.022909859 | 0.803092298 |
| pcaac320.pcaac424                  | -0.002094633 | 0.008384762 | 0.803105207 |
| asparagine.pcaac361                | 0.013867221  | 0.055518999 | 0.803135998 |
| c12.c18                            | 0.009415246  | 0.037703381 | 0.803178793 |
| pcaac380.c182                      | 0.007286055  | 0.029182189 | 0.803212881 |
| c51.pcaac323                       | -0.011695157 | 0.046851919 | 0.803255431 |
| smc160.pcaec403                    | -0.005337923 | 0.021385591 | 0.803267696 |
| lysopcac180.c141                   | -0.003715897 | 0.014887477 | 0.803271433 |
| isoleucine.valine                  | 0.038443304  | 0.154022624 | 0.803274279 |
| pcaec384.pcaac366                  | 0.001917019  | 0.00768118  | 0.803291057 |
| pcaec402.pcaac360                  | -0.015933698 | 0.063844179 | 0.803292425 |
| serine.pcaec340                    | 0.0127747    | 0.051210533 | 0.80338282  |
| pcaec444.pcaac321                  | 0.005641124  | 0.022614541 | 0.803388828 |
| smohc241.pcaac363                  | 0.001643579  | 0.006590509 | 0.803435934 |

|                                    |              |             |             |
|------------------------------------|--------------|-------------|-------------|
| pcaec423.smohc221                  | 0.02148642   | 0.086157828 | 0.803436953 |
| pcaac322.asymmetricdimethylarginir | 0.003678645  | 0.014751583 | 0.803445846 |
| glutamine.c142                     | -0.010782756 | 0.043241191 | 0.803453436 |
| alphaaminoadipicacid.smc160        | -0.008818926 | 0.035366469 | 0.803457029 |
| pcaec300.pcaec380                  | 0.010871041  | 0.043596465 | 0.803458873 |
| c3.ornithine                       | 0.005647259  | 0.022648953 | 0.803472283 |
| asymmetricdimethylarginine.pcaec34 | 0.010977233  | 0.044040224 | 0.803537075 |
| c10.pcaec386                       | -0.000865956 | 0.003474269 | 0.803541888 |
| pcaac344.h1                        | 0.000306436  | 0.001229507 | 0.803552174 |
| glycine.isoleucine                 | 0.004059055  | 0.016293592 | 0.803641283 |
| pcaac380.taurine                   | -0.011197913 | 0.044959741 | 0.80368325  |
| c16.lysopcac161                    | 0.01529139   | 0.061398381 | 0.803693545 |
| smohc141.alanine                   | -0.007534176 | 0.030274831 | 0.803842225 |
| pcaac385.smc260                    | -0.005959094 | 0.023956408 | 0.80392871  |
| lysopcac281.pcaac361               | -0.010327091 | 0.041543835 | 0.804055606 |
| pcaec380.c142                      | 0.009748189  | 0.039215591 | 0.804058379 |
| citruiline.tyrosine                | 0.009813449  | 0.03948723  | 0.804102635 |
| leucine.ornithine                  | -0.009328743 | 0.037539556 | 0.804116325 |
| pcaec385.pcaec340                  | -0.006535872 | 0.026304529 | 0.80414327  |
| pcaec301.pcaec422                  | -0.003661241 | 0.01473526  | 0.804144388 |
| pcaec341.pcaac405                  | -0.01417643  | 0.057058764 | 0.804155854 |
| smohc161.smc241                    | 0.012212588  | 0.04918832  | 0.804287785 |
| ornithine.c4                       | -0.001660074 | 0.006693514 | 0.80449622  |
| c8.pcaec405                        | -0.002498043 | 0.010073093 | 0.80451214  |
| pcaec423.c51dc                     | -0.025600999 | 0.103245338 | 0.80453449  |
| pcaac342.glutamicacid              | -0.008398314 | 0.033871497 | 0.804547171 |
| pcaec446.pcaac322                  | 0.011539412  | 0.046544969 | 0.804567785 |
| pcaac341.pcaac363                  | -0.002576487 | 0.010392818 | 0.804574993 |
| smc261.pcaac380                    | 0.012335799  | 0.04976405  | 0.804593955 |
| pcaac240.pcaec402                  | -0.015032332 | 0.060651497 | 0.804623358 |
| pcaac365.pcaec402                  | 0.005869824  | 0.02368435  | 0.804632716 |
| pcaac361.smc202                    | 0.005583539  | 0.02253053  | 0.804643938 |
| pcaec383.pcaec386                  | -0.001863905 | 0.007521822 | 0.804660393 |
| glutamine.pcaac385                 | 0.002042576  | 0.008243379 | 0.804672699 |
| pcaac365.pcaac421                  | -0.010083062 | 0.040702825 | 0.804718941 |
| c3.kynurenine                      | 0.010432643  | 0.042130433 | 0.804793571 |
| c3.asparticacid                    | -0.006166818 | 0.024909462 | 0.80483832  |
| pcaac341.pcaec362                  | 0.008771761  | 0.035456335 | 0.804972029 |
| pcaac383.pcaac421                  | -0.009279084 | 0.037507966 | 0.804977019 |
| pcaac381.pcaec384                  | -0.008839143 | 0.035741004 | 0.805037795 |
| pcaec446.pcaac426                  | -0.016110457 | 0.065143094 | 0.805039523 |
| serine.pcaec406                    | -0.013900778 | 0.056212877 | 0.805055435 |
| glycine.c101                       | -0.001803017 | 0.007295678 | 0.805173771 |
| c182.alanine                       | -0.003551747 | 0.014376668 | 0.80523985  |
| pcaac401.smc180                    | 0.000700964  | 0.002837895 | 0.805276771 |

|                                  |              |             |             |
|----------------------------------|--------------|-------------|-------------|
| lysopcac181.pcaac342             | -0.001780055 | 0.00720685  | 0.80528197  |
| pcaec422.pcaac281                | -0.000651892 | 0.002639663 | 0.805308757 |
| leucine.pcaac300                 | 0.008144007  | 0.032977403 | 0.80531104  |
| smc260.valine                    | -0.011783552 | 0.047718687 | 0.805325943 |
| pcaac343.smc160                  | -0.018051641 | 0.073109067 | 0.805344517 |
| pcaec444.c18                     | -0.006055221 | 0.024537142 | 0.805449619 |
| pcaac341.smc202                  | -0.006156469 | 0.024953224 | 0.805493936 |
| lysopcac160.pcaec362             | 0.003866521  | 0.015674951 | 0.805533786 |
| c10.pcaac424                     | 0.001526791  | 0.006190444 | 0.805558563 |
| prolinr.smc161                   | 0.013463833  | 0.05459137  | 0.805564271 |
| ornithine.pcaec403               | 0.007384843  | 0.029948551 | 0.805599037 |
| pcaac363.pcaac361                | -0.025515259 | 0.103503023 | 0.805651002 |
| smc240.pcaac320                  | -0.010930228 | 0.044343171 | 0.805670505 |
| pcaac342.smc241                  | -0.002133242 | 0.00865537  | 0.805691554 |
| leucine.pcaec402                 | 0.007756445  | 0.031473006 | 0.805704685 |
| pcaac300.arginine                | -0.013444031 | 0.054551349 | 0.805704895 |
| leucine.taurine                  | -0.00781341  | 0.031707258 | 0.805723329 |
| pcaac321.smohc141                | 0.005550292  | 0.022525572 | 0.805741699 |
| h1.pcaec422                      | 0.010564907  | 0.042881024 | 0.805759009 |
| c181.pcaac424                    | -0.00147987  | 0.006007815 | 0.805800013 |
| c18.pcaac360                     | -0.006391547 | 0.025954056 | 0.805846554 |
| smc180.pcaac320                  | 0.007505864  | 0.030485032 | 0.805884519 |
| asparagine.phenylalanine         | -0.006451451 | 0.026206429 | 0.805912751 |
| c51dc.lysopcac281                | -0.004154021 | 0.016874806 | 0.805921388 |
| c10.threonine                    | 0.005744348  | 0.02334047  | 0.805964608 |
| pcaac281.pcaec401                | 0.013847399  | 0.056309668 | 0.806115975 |
| smohc241.pcaec384                | 0.012235073  | 0.049753682 | 0.80611768  |
| pcaac404.pcaac321                | 0.007435595  | 0.03025993  | 0.806263532 |
| c16.pcaec422                     | -0.005336624 | 0.021719152 | 0.806274053 |
| creatinine.arginine              | -0.009110801 | 0.037085486 | 0.806305141 |
| pcaec422.glycine                 | -0.004631929 | 0.018855448 | 0.80631717  |
| c14.lysopcac280                  | -0.00232875  | 0.00948172  | 0.806356217 |
| pcaac363.c101                    | -0.001893953 | 0.007711675 | 0.806362843 |
| pcaac380.lysopcac204             | -0.006740339 | 0.027453668 | 0.806423643 |
| c0.c102                          | 0.004988621  | 0.020321265 | 0.806446185 |
| alphaaminoadipicacid.c162        | -0.014759458 | 0.060139963 | 0.806499686 |
| pcaec446.smc181                  | -0.005285539 | 0.021537856 | 0.806508621 |
| pcaec381.lysopcac160             | 0.004139752  | 0.016872242 | 0.806545847 |
| smc260.prolinr                   | 0.002843365  | 0.011591588 | 0.806594656 |
| lysopcac181.alphaaminoadipicacid | 0.0023419    | 0.009548475 | 0.806618829 |
| c2.pcaec365                      | 0.005699199  | 0.023241389 | 0.806654842 |
| acetylorithoine.pcaac364         | -0.011350252 | 0.046289712 | 0.80666824  |
| pcaac426.pcaac360                | -0.005895045 | 0.024046326 | 0.806704282 |
| smc181.methionine                | 0.003959378  | 0.016158962 | 0.806802371 |
| lysine.pcaec402                  | 0.006626752  | 0.027052747 | 0.806856482 |

|                                    |              |             |             |
|------------------------------------|--------------|-------------|-------------|
| pcaac385.asymmetricdimethylarginir | 0.007401661  | 0.03023553  | 0.806977486 |
| pcaac320.pcaec384                  | -0.003878492 | 0.015843737 | 0.806980233 |
| smc202.smc260                      | -0.006856759 | 0.028011753 | 0.806991861 |
| pcaac383.pcaec420                  | -0.008591764 | 0.035108936 | 0.807041474 |
| smc241.c4                          | -0.006108759 | 0.024971    | 0.807105742 |
| pcaac240.smohc222                  | 0.001705633  | 0.006973118 | 0.807131178 |
| lysopcac281.putrescine             | 0.011231244  | 0.04593757  | 0.807217694 |
| pcaec383.pcaac383                  | 0.001954085  | 0.008000361 | 0.807402927 |
| lysopcac182.smc240                 | -0.01202019  | 0.049225394 | 0.807451497 |
| pcaec425.glycine                   | -0.003483621 | 0.014267494 | 0.807468389 |
| pcaac365.isoleucine                | 0.006717613  | 0.027515107 | 0.807485535 |
| pcaec362.c16                       | 0.009453666  | 0.038737598 | 0.80756207  |
| smohc161.pcaac320                  | 0.009406714  | 0.038556739 | 0.807618507 |
| smc241.pcaec425                    | 0.000944912  | 0.003873698 | 0.807649822 |
| pcaec424.putrescine                | -0.010392417 | 0.042612287 | 0.807686183 |
| pcaec443.pcaac360                  | -0.01026864  | 0.042113397 | 0.807724849 |
| pcaac364.arginine                  | 0.008135042  | 0.033363188 | 0.80772501  |
| pcaac380.pcaec343                  | 0.021903343  | 0.089846825 | 0.807761724 |
| pcaec443.c18                       | -0.010917377 | 0.044802071 | 0.807843039 |
| lysopcac160.lysopcac140            | 0.000849226  | 0.003485199 | 0.80785361  |
| pcaac360.pcaec405                  | -0.016293198 | 0.066870589 | 0.807864306 |
| glycine.pcaac364                   | 0.011550067  | 0.047416842 | 0.807916036 |
| pcaac360.pcaec301                  | 0.016136137  | 0.066246365 | 0.807922263 |
| citruiline.pcaec402                | -0.007827939 | 0.032141132 | 0.807944475 |
| pcaac360.phenylalanine             | 0.006266362  | 0.025732503 | 0.807967378 |
| pcaec420.taurine                   | 0.004429171  | 0.018190373 | 0.807990191 |
| smohc161.pcaac361                  | 0.009067493  | 0.0372405   | 0.807994128 |
| asparagine.glutamicacid            | -0.009920143 | 0.040745167 | 0.808007074 |
| smc240.c102                        | 0.0056738    | 0.023317145 | 0.808112448 |
| smohc222.pcaac364                  | 0.009540764  | 0.039238367 | 0.808253762 |
| acetylnithoine.pcaec403            | -0.010033639 | 0.041276534 | 0.808304392 |
| c101.pcaec405                      | -0.005190027 | 0.021359193 | 0.808378143 |
| c51dc.smc240                       | -0.005187825 | 0.021351935 | 0.808394026 |
| methioninesulfoxide.c142           | -0.006317359 | 0.026008592 | 0.808449946 |
| pcaac424.c14                       | 0.018190901  | 0.074899258 | 0.808468129 |
| pcaec406.pcaec341                  | 0.008200794  | 0.0337694   | 0.808487211 |
| lysopcac204.pcaac281               | 0.00074833   | 0.003081661 | 0.808497704 |
| c51.glutamicacid                   | 0.014077213  | 0.057988229 | 0.808554516 |
| histidine.methioninesulfoxide      | 0.002493431  | 0.010273666 | 0.80859987  |
| smohc161.pcaac323                  | 0.019240758  | 0.079286769 | 0.808621656 |
| acetylnithoine.smc180              | -0.012297976 | 0.050685133 | 0.808651218 |
| pcaac364.pcaec402                  | -0.004891958 | 0.020162247 | 0.808655222 |
| c10.pcaec361                       | -0.002016092 | 0.008310627 | 0.80868427  |
| prolinr.pcaac360                   | -0.004011395 | 0.016536821 | 0.808698586 |
| pcaac360.smc180                    | -0.001367536 | 0.005639045 | 0.808746209 |

|                                    |              |             |             |
|------------------------------------|--------------|-------------|-------------|
| c102.smohc241                      | 0.015198173  | 0.062670526 | 0.808748375 |
| serotonin.lysine                   | -0.012192393 | 0.050286442 | 0.808787229 |
| pcaec444.c4                        | -0.003708111 | 0.015294943 | 0.808801568 |
| leucine.c102                       | 0.002978074  | 0.012291867 | 0.808925506 |
| pcaac402.methioninesulfoxide       | 0.005831911  | 0.02407317  | 0.808942776 |
| alphaaminoadipicacid.asymmetricdin | -0.014407941 | 0.059480488 | 0.80896442  |
| c16.lysopcac182                    | -0.013568579 | 0.056016979 | 0.808969895 |
| c4.pcaac402                        | -0.021057386 | 0.086948111 | 0.809000246 |
| arginine.tyrosine                  | -0.014972466 | 0.061840233 | 0.809052879 |
| c16.pcaac360                       | 0.008572193  | 0.035412695 | 0.809091351 |
| pcaac322.pcaec420                  | -0.007383826 | 0.030504891 | 0.809100406 |
| c16.lysopcac203                    | 0.003983613  | 0.01645956  | 0.809123252 |
| pcaac405.pcaec362                  | -0.003759598 | 0.015537792 | 0.809169274 |
| c51dc.smc161                       | 0.015049406  | 0.062248396 | 0.809324723 |
| lysopcac140.lysopcac204            | -0.007081243 | 0.029289956 | 0.809324915 |
| pcaec385.c182                      | 0.005126628  | 0.021213451 | 0.809398226 |
| pcaac363.lysopcac203               | -0.004500716 | 0.018626363 | 0.809427015 |
| lysopcac203.pcaec362               | -0.004394348 | 0.018189274 | 0.809459066 |
| pcaac322.pcaec446                  | -0.016811113 | 0.06965924  | 0.809657427 |
| smc161.methionine                  | 0.004840425  | 0.020065677 | 0.80973823  |
| pcaac384.c12                       | 0.011470841  | 0.047556556 | 0.809757475 |
| c101.pcaec403                      | 0.004237222  | 0.017567709 | 0.809765571 |
| pcaec300.smc240                    | -0.006994305 | 0.029015514 | 0.809873683 |
| c8.pcaec361                        | -0.001788024 | 0.007418561 | 0.809899722 |
| methioninesulfoxide.taurine        | -0.012961156 | 0.053794931 | 0.809964632 |
| pcaac323.pcaec383                  | -0.013831992 | 0.057432899 | 0.810041158 |
| lysopcac280.pcaac343               | -0.004132748 | 0.017161758 | 0.81006126  |
| smohc161.c18                       | -0.006743732 | 0.028008141 | 0.810087473 |
| pcaec381.transhydroxyproline       | 0.016859169  | 0.070025049 | 0.810101737 |
| alphaaminoadipicacid.glycine       | 0.009429355  | 0.03917806  | 0.810163347 |
| c0.pcaec343                        | -0.012853742 | 0.053427793 | 0.810239091 |
| isoleucine.pcaac425                | -0.01879241  | 0.078135053 | 0.810292979 |
| smohc241.pcaac240                  | -0.002436925 | 0.010134974 | 0.810343151 |
| pcaac363.c51                       | -0.022326054 | 0.092865186 | 0.810369011 |
| c162.lysopcac180                   | 0.007299643  | 0.03036903  | 0.810406844 |
| prolinr.c141oh                     | -0.029671639 | 0.123516269 | 0.81051527  |
| c101.c51                           | -0.010832772 | 0.045109332 | 0.810576949 |
| smc161.c142                        | -0.008073271 | 0.033622416 | 0.810599457 |
| smohc241.pcaac424                  | 0.001465964  | 0.006106222 | 0.810629304 |
| prolinr.pcaec444                   | 0.02109753   | 0.087946503 | 0.81077371  |
| pcaac386.taurine                   | 0.005400971  | 0.022515137 | 0.81078047  |
| pcaec425.serine                    | -0.00453061  | 0.018891438 | 0.810825553 |
| pcaec444.pcaec365                  | 0.003529146  | 0.014716749 | 0.810840062 |
| acetylnithoine.glutamine           | 0.003910891  | 0.016308899 | 0.810842924 |
| pcaac386.pcaec383                  | -0.014445025 | 0.060239032 | 0.810847515 |

|                               |              |             |             |
|-------------------------------|--------------|-------------|-------------|
| arginine.pcaac366             | 0.013535622  | 0.056455064 | 0.810875279 |
| pcaac426.c142                 | 0.006358339  | 0.026538916 | 0.811009699 |
| pcaec443.pcaec420             | 0.005823836  | 0.024309677 | 0.811022733 |
| pcaec363.pcaec423             | 0.003540748  | 0.01478105  | 0.811039914 |
| c102.c141oh                   | -0.025641609 | 0.107134286 | 0.811199001 |
| pcaec381.pcaec421             | -0.002035448 | 0.008509394 | 0.811307923 |
| c102.h1                       | 0.001185756  | 0.004958294 | 0.811349783 |
| alphaaminoadipicacid.pcaac384 | -0.010476222 | 0.043815554 | 0.811386726 |
| lysine.putrescine             | 0.010942874  | 0.045768899 | 0.8113933   |
| pcaec402.pcaac404             | 0.003051413  | 0.012766812 | 0.811453962 |
| putrescine.pcaec386           | 0.00136595   | 0.005715544 | 0.811471496 |
| c16.pcaac361                  | 0.007936804  | 0.033225112 | 0.811555851 |
| lysopcac204.pcaac361          | 0.008195492  | 0.034308552 | 0.811558639 |
| pcaac406.smohc241             | 0.009380373  | 0.039281706 | 0.81161946  |
| pcaac401.pcaec406             | -0.010705537 | 0.044852414 | 0.811707571 |
| pcaec301.c101                 | -0.002368642 | 0.009924826 | 0.81172722  |
| glutamicacid.pcaac420         | 0.013688286  | 0.057358402 | 0.811737597 |
| c142.lysopcac161              | 0.017476253  | 0.073266433 | 0.811826362 |
| pcaec340.smc260               | -0.005605727 | 0.023501997 | 0.811833196 |
| leucine.c12                   | -0.006989291 | 0.029303166 | 0.811836856 |
| pcaec402.threonine            | -0.006164798 | 0.025852264 | 0.811878634 |
| glutamicacid.pcaac383         | 0.001570877  | 0.006587562 | 0.811879804 |
| kynurenine.pcaac406           | 0.010847688  | 0.0454981   | 0.811911071 |
| pcaac383.pcaac364             | 0.011385936  | 0.047782434 | 0.812014498 |
| pcaac386.transhydroxyproline  | 0.004828659  | 0.020266263 | 0.812034702 |
| c141.lysopcac170              | -0.00367089  | 0.015407754 | 0.812043571 |
| lysopcac140.pcaec384          | 0.006073231  | 0.025502341 | 0.812125168 |
| c181.c8                       | -0.012859071 | 0.054050718 | 0.812308284 |
| pcaec360.pcaec422             | -0.004441014 | 0.018683883 | 0.812474916 |
| c101.smohc141                 | 0.004915372  | 0.020681155 | 0.812489069 |
| pcaec342.pcaac364             | 0.009730348  | 0.040945597 | 0.812514652 |
| c162.acetylnithoine           | -0.003960691 | 0.016679328 | 0.812653846 |
| c102.pcaac404                 | -0.001021351 | 0.004301249 | 0.81265903  |
| pcaac403.threonine            | -0.004451218 | 0.018745906 | 0.812662327 |
| c5.smc240                     | -0.022178917 | 0.093417732 | 0.812688314 |
| pcaac406.c51dc                | -0.02335481  | 0.098404705 | 0.812752011 |
| c182.pcaec343                 | 0.012441776  | 0.05242874  | 0.812772118 |
| pcaec361.lysopcac281          | -0.006728249 | 0.028367993 | 0.812873398 |
| c10.acetylnithoine            | -0.005530218 | 0.023322629 | 0.812919368 |
| asparticacid.pcaec425         | 0.001275423  | 0.005380502 | 0.812975738 |
| pcaec404.smc180               | 0.000737061  | 0.00311022  | 0.813026106 |
| pcaac341.methionine           | -0.007182512 | 0.030314108 | 0.813060156 |
| c141oh.asparticacid           | 0.007674329  | 0.032406576 | 0.813154855 |
| c2.smohc241                   | 0.008736065  | 0.03689406  | 0.813175067 |
| pcaac362.pcaac323             | 0.013572568  | 0.057335266 | 0.81322539  |



|                               |              |             |             |
|-------------------------------|--------------|-------------|-------------|
| lysopcac203.c8                | 0.008955858  | 0.037833465 | 0.813229227 |
| pcaac381.lysopcac204          | -0.013747226 | 0.058077532 | 0.813239436 |
| pcaac320.pcaac384             | 0.014954383  | 0.063178942 | 0.813243978 |
| c101.pcaec404                 | -0.004340145 | 0.018337025 | 0.813252755 |
| pcaec363.lysopcac281          | 0.004058401  | 0.017146812 | 0.813254347 |
| pcaac281.valine               | 0.007929535  | 0.033514696 | 0.813321488 |
| pcaac402.pcaac361             | -0.013539063 | 0.057223984 | 0.813322298 |
| pcaec362.pcaac383             | 0.002238803  | 0.009462522 | 0.813322965 |
| methioninesulfoxide.pcaec386  | 0.003021428  | 0.012770452 | 0.813324237 |
| lysopcac182.pcaac401          | -0.000875189 | 0.003699442 | 0.813341234 |
| pcaac380.c8                   | -0.009014703 | 0.038106416 | 0.813346429 |
| pcaec403.pcaec406             | -0.009248658 | 0.039110674 | 0.813418067 |
| pcaac363.c16                  | 0.008128392  | 0.034378139 | 0.813443843 |
| pcaec383.methioninesulfoxide  | 0.004269513  | 0.018062108 | 0.813491209 |
| pcaec386.pcaac360             | 0.012092265  | 0.051163522 | 0.813517626 |
| smc240.pcaac300               | 0.010932294  | 0.046258195 | 0.813527997 |
| pcaec341.pcaec402             | 0.012947824  | 0.054793754 | 0.813551958 |
| prolinr.pcaec423              | 0.002159685  | 0.009139709 | 0.813555172 |
| c5.pcaac322                   | 0.017820794  | 0.075420095 | 0.813562816 |
| methionine.c141               | 0.006851005  | 0.029005378 | 0.813631991 |
| pcaac341.c3                   | -0.006667616 | 0.028229008 | 0.813632335 |
| pcaac360.alphaaminoadipicacid | -0.001132274 | 0.004795051 | 0.813681407 |
| pcaec443.pcaec383             | -0.032237782 | 0.136566189 | 0.813738841 |
| pcaac240.pcaec421             | -0.001812992 | 0.007681552 | 0.813770478 |
| citrusline.lysopcac180        | -0.006829702 | 0.028951182 | 0.81385941  |
| pcaec386.pcaec362             | -0.003467408 | 0.014701692 | 0.813900532 |
| putrescine.pcaac323           | 0.016136201  | 0.068499099 | 0.814119622 |
| pcaac425.smc260               | -0.006502489 | 0.027604475 | 0.814126468 |
| pcaac362.pcaec385             | -0.013477004 | 0.057216429 | 0.814138029 |
| c14.lysine                    | 0.010111725  | 0.042940248 | 0.814185033 |
| spermidine.asparagine         | -0.008107112 | 0.034428672 | 0.814191257 |
| smc240.glycine                | 0.006802752  | 0.028891578 | 0.814204905 |
| pcaac421.pcaec384             | 0.003723537  | 0.0158193   | 0.814265759 |
| smc160.alphaaminoadipicacid   | -0.001695559 | 0.00720632  | 0.814336705 |
| pcaec363.ornithine            | 0.009939182  | 0.042244608 | 0.814345112 |
| pcaac385.pcaac364             | -0.014421983 | 0.061304223 | 0.814363898 |
| prolinr.pcaac426              | 0.014871718  | 0.06322288  | 0.814383924 |
| smc202.smc161                 | 0.019635076  | 0.083529664 | 0.814507642 |
| serine.pcaac361               | 0.012197968  | 0.051919132 | 0.814604786 |
| c12.h1                        | 0.000533846  | 0.002273538 | 0.814707836 |
| pcaac342.pcaac425             | 0.020460067  | 0.087153061 | 0.8147454   |
| c4.lysopcac203                | -0.003321393 | 0.014151021 | 0.814783873 |
| pcaec423.c182                 | 0.006593977  | 0.028094103 | 0.814783979 |
| pcaec443.pcaac383             | -0.001647467 | 0.007019312 | 0.814788149 |
| putrescine.lysopcac181        | 0.005929966  | 0.025270748 | 0.81482505  |

|                       |              |             |             |
|-----------------------|--------------|-------------|-------------|
| pcaac426.creatinine   | 0.003943839  | 0.01681179  | 0.814879008 |
| pcaac362.lysopcac170  | -0.001805317 | 0.007700272 | 0.814986871 |
| pcaac343.c12          | 0.00810109   | 0.034560307 | 0.81502095  |
| asparagine.methionine | -0.007720071 | 0.03293517  | 0.815022826 |
| lysopcac140.pcaec423  | 0.001972789  | 0.008416815 | 0.815034709 |
| pcaec404.pcaec425     | -0.001933971 | 0.008258276 | 0.815190317 |
| pcaec382.asparagine   | 0.003228903  | 0.013788804 | 0.815203773 |
| lysopcac140.pcaec386  | 0.001836565  | 0.00784372  | 0.81522225  |
| glutamine.glycine     | 0.004772698  | 0.020395675 | 0.815330111 |
| pcaec381.c5           | -0.003538296 | 0.015124281 | 0.815374564 |
| pcaec445.smohc141     | -0.003904203 | 0.016695399 | 0.815451274 |
| c181.pcaec445         | 0.0160403    | 0.068597434 | 0.815464176 |
| pcaec362.pcaec386     | -0.002206454 | 0.009440396 | 0.81554759  |
| smc240.pcaec362       | 0.003392526  | 0.014520886 | 0.815620345 |
| pcaac364.c182         | 0.005093647  | 0.021807176 | 0.815662311 |
| pcaac363.glycine      | 0.012333231  | 0.052803888 | 0.81567     |
| pcaac323.lysopcac281  | -0.004062507 | 0.017411921 | 0.815863088 |
| smc181.pcaec423       | 0.002420923  | 0.010377592 | 0.81588935  |
| pcaec322.lysopcac182  | 0.0055776    | 0.023932719 | 0.816067823 |
| smc260.pcaec343       | 0.01238657   | 0.053152723 | 0.816080208 |
| pcaac403.pcaec365     | -0.004319298 | 0.018537701 | 0.81610861  |
| pcaec342.pcaec380     | 0.005413557  | 0.023234634 | 0.81611292  |
| pcaac426.c101         | -0.000971903 | 0.00417311  | 0.816189205 |
| pcaac403.pcaec340     | -0.010017399 | 0.043015982 | 0.816205089 |
| c162.phenylalanine    | -0.006262608 | 0.026893912 | 0.816215012 |
| pcaac281.pcaac421     | 0.014960755  | 0.064252488 | 0.816230672 |
| pcaac343.pcaec444     | 0.018739773  | 0.080498507 | 0.816266842 |
| lysopcac161.alanine   | 0.009577441  | 0.041154601 | 0.816327236 |
| c142.pcaec343         | -0.012946073 | 0.055638594 | 0.816355965 |
| pcaec401.c102         | -0.005485803 | 0.0235772   | 0.816361753 |
| c181.tryptophan       | 0.00593732   | 0.025521721 | 0.816389776 |
| pcaec386.lysopcac182  | -0.002164799 | 0.009305981 | 0.816400161 |
| pcaec362.pcaec420     | 0.003939909  | 0.016942424 | 0.816460259 |
| c141.pcaac360         | -0.006021293 | 0.025894208 | 0.816470044 |
| pcaec343.pcaac406     | 0.008271252  | 0.035579591 | 0.816518509 |
| pcaac405.tyrosine     | -0.009818414 | 0.04223768  | 0.816530537 |
| putrescine.pcaac361   | -0.008718573 | 0.037513801 | 0.816566605 |
| pcaac385.pcaec425     | -0.00163889  | 0.007054945 | 0.816648734 |
| c4.pcaec405           | -0.005534238 | 0.023866093 | 0.816971765 |
| pcaac383.pcaac362     | 0.006387855  | 0.027551834 | 0.817001528 |
| pcaac403.pcaec445     | 0.019678267  | 0.084888664 | 0.817029416 |
| pcaec365.lysopcac204  | -0.005615379 | 0.024226169 | 0.817047147 |
| pcaac240.c14          | 0.008528743  | 0.036798221 | 0.817062088 |
| pcaac385.pcaac426     | -0.011649522 | 0.050265956 | 0.817072024 |
| creatinine.pcaac360   | 0.004407801  | 0.019030411 | 0.817179712 |

|                                     |              |             |             |
|-------------------------------------|--------------|-------------|-------------|
| pcaec421.smc180                     | 0.000673559  | 0.002908219 | 0.817190004 |
| smohc222.smohc141                   | -0.02796556  | 0.120777787 | 0.817236475 |
| pcaec301.pcaac422                   | -0.007392261 | 0.031928461 | 0.81725184  |
| pcaec402.lysopcac182                | -0.011155005 | 0.048202808 | 0.817335232 |
| pcaac426.isoleucine                 | -0.007201351 | 0.031122768 | 0.817360717 |
| asymmetricdimethylarginine.threonir | -0.005513771 | 0.023829688 | 0.817362928 |
| c5.smc161                           | 0.026013048  | 0.112457087 | 0.817414953 |
| c2.methioninesulfoxide              | 0.003088364  | 0.013356199 | 0.817480499 |
| smc260.pcaac380                     | 0.004426163  | 0.019150915 | 0.817566261 |
| pcaec424.pcaac425                   | -0.017780498 | 0.076935359 | 0.817574472 |
| isoleucine.pcaac366                 | -0.003060313 | 0.013243741 | 0.817600367 |
| pcaec340.c14                        | -0.007894981 | 0.034171049 | 0.817626103 |
| smc260.c16                          | -0.01008248  | 0.043643349 | 0.817644031 |
| asparticacid.c10                    | -0.002666729 | 0.011546909 | 0.817700176 |
| pcaac405.pcaec342                   | 0.021368165  | 0.092560409 | 0.817770747 |
| pcaac344.pcaac385                   | -0.006750653 | 0.029242652 | 0.817776061 |
| alphaaminoadipicacid.pcaec444       | -0.01262683  | 0.054703772 | 0.817797494 |
| lysopcac182.c10                     | 0.004917244  | 0.021322628 | 0.817960621 |
| pcaac384.methioninesulfoxide        | 0.002409524  | 0.010449956 | 0.81798709  |
| putrescine.smc240                   | -0.007071731 | 0.030669871 | 0.817988296 |
| pcaec385.pcaec365                   | 0.010154808  | 0.044047949 | 0.818016191 |
| acetylmithoine.lysopcac182          | -0.016125111 | 0.069989104 | 0.818128843 |
| lysopcac182.pcaec382                | -0.001571213 | 0.00682313  | 0.81821973  |
| pcaac281.pcaec340                   | -0.013681144 | 0.059439407 | 0.818303314 |
| lysopcac170.taurine                 | -0.006147332 | 0.026713684 | 0.818342368 |
| methioninesulfoxide.smohc241        | -0.015048289 | 0.065402417 | 0.818366848 |
| c141oh.pcaec340                     | 0.009406636  | 0.040892108 | 0.818407314 |
| isoleucine.lysopcac280              | -0.001940506 | 0.008437448 | 0.818444674 |
| leucine.pcaec385                    | -0.01109361  | 0.048240249 | 0.818461315 |
| pcaac344.pcaec423                   | 0.001484069  | 0.006453907 | 0.818474461 |
| pcaec361.lysopcac160                | 0.01300349   | 0.05656655  | 0.818528274 |
| pcaac344.taurine                    | 0.002347831  | 0.01021387  | 0.818538068 |
| pcaec382.asymmetricdimethylarginir  | 0.003893644  | 0.016943201 | 0.818585511 |
| pcaec425.pcaac385                   | -0.008439244 | 0.036724621 | 0.818591497 |
| pcaec382.c3                         | -0.010457914 | 0.045515054 | 0.818614561 |
| pcaec401.serine                     | 0.012766494  | 0.05556312  | 0.818616612 |
| pcaec424.transhydroxyproline        | -0.009072061 | 0.039503837 | 0.818706177 |
| lysopcac180.h1                      | -0.00027437  | 0.001194785 | 0.818714294 |
| pcaec341.tyrosine                   | -0.010579579 | 0.046075028 | 0.818732372 |
| pcaec382.pcaac320                   | -0.013274187 | 0.057823884 | 0.818774238 |
| c2.lysopcac203                      | -0.002202723 | 0.009603791 | 0.81893137  |
| c4.pcaec322                         | 0.014657507  | 0.063911823 | 0.818947065 |
| putrescine.pcaac281                 | -0.000229785 | 0.001002634 | 0.819069754 |
| pcaec420.pcaac420                   | 0.020676343  | 0.090245624 | 0.819123644 |
| c102.smc241                         | 0.004481374  | 0.019560422 | 0.81912964  |

|                                    |              |             |             |
|------------------------------------|--------------|-------------|-------------|
| lysopcac160.pcaec421               | -0.001079977 | 0.004714179 | 0.819139599 |
| lysopcac281.pcaac322               | 0.006438857  | 0.028112845 | 0.819182409 |
| pcaac420.pcaec301                  | 0.012505571  | 0.054619212 | 0.819242069 |
| smohc221.pcaac426                  | -0.005259032 | 0.02296956  | 0.819244085 |
| pcaac362.pcaac342                  | 0.008688366  | 0.037957158 | 0.819288553 |
| c0.c141                            | -0.010263584 | 0.044851631 | 0.819339075 |
| pcaec422.spermidine                | -0.01191954  | 0.052096209 | 0.819366631 |
| c3.valine                          | 0.013850875  | 0.060541085 | 0.819377408 |
| glycine.pcaac422                   | -0.00640068  | 0.027981287 | 0.819405433 |
| pcaec421.lysopcac182               | 0.018925145  | 0.082758297 | 0.819458847 |
| pcaec443.pcaec424                  | 0.007827717  | 0.034246858 | 0.81954596  |
| pcaac363.asymmetricdimethylarginir | -0.004534503 | 0.01984553  | 0.819606127 |
| creatinine.isoleucine              | -0.004711081 | 0.020623274 | 0.819648565 |
| pcaac403.methioninesulfoxide       | 0.007707114  | 0.033749661 | 0.819705925 |
| smc161.lysopcac182                 | -0.005250353 | 0.023012324 | 0.819866719 |
| lysopcac203.pcaac384               | -0.00823987  | 0.036128106 | 0.819929011 |
| pcaac343.histidine                 | 0.012380126  | 0.054293263 | 0.819968139 |
| smc241.pcaac321                    | -0.003915845 | 0.017177368 | 0.82001303  |
| pcaec363.threonine                 | 0.00654553   | 0.028714621 | 0.820024112 |
| pcaec364.pcaec322                  | -0.02590684  | 0.113653305 | 0.82002791  |
| lysopcac140.c10                    | 0.00172833   | 0.007582216 | 0.820028723 |
| methioninesulfoxide.pcaec425       | -0.001327836 | 0.005826719 | 0.820073446 |
| pcaac404.smohc241                  | 0.009369812  | 0.041133712 | 0.820149796 |
| c142.pcaec385                      | -0.010875906 | 0.047746915 | 0.820155023 |
| pcaac360.smohc141                  | -0.006559634 | 0.028800059 | 0.820168823 |
| pcaec301.lysopcac182               | 0.003298526  | 0.014484336 | 0.820195234 |
| c142.c2                            | -0.010389032 | 0.045622736 | 0.820206438 |
| pcaac362.c14                       | 0.004912735  | 0.021574632 | 0.820212077 |
| pcaac403.valine                    | 0.005076593  | 0.022303542 | 0.820285862 |
| pcaec361.smohc241                  | 0.015311671  | 0.067276822 | 0.820302686 |
| lysopcac281.pcaac383               | 0.000712844  | 0.003136535 | 0.820551774 |
| smc241.pcaec386                    | 0.002205919  | 0.009707261 | 0.820572613 |
| c3.c16                             | 0.006116992  | 0.026923775 | 0.820609494 |
| pcaac343.alphaaminoadipicacid      | -0.002033879 | 0.008956487 | 0.820696557 |
| c51dc.methioninesulfoxide          | 0.006572468  | 0.028945098 | 0.820710357 |
| pcaac401.glutamicacid              | 0.016511151  | 0.072746523 | 0.82078676  |
| prolinr.pcaac344                   | 0.015850816  | 0.069852833 | 0.820826305 |
| c3.smohc141                        | -0.003567169 | 0.01573109  | 0.820949002 |
| pcaec363.taurine                   | 0.010340086  | 0.045625449 | 0.821049431 |
| c4.pcaac381                        | 0.007409039  | 0.032699927 | 0.821090687 |
| pcaac322.pcaec402                  | 0.005644201  | 0.024922165 | 0.82117099  |
| c10.c51                            | -0.012570033 | 0.055507187 | 0.821182945 |
| smohc241.pcaec421                  | 0.000313342  | 0.001384137 | 0.821242864 |
| pcaac405.c142                      | 0.008650676  | 0.038216025 | 0.821256854 |
| c5.pcaac383                        | 0.001590827  | 0.007029882 | 0.821309297 |

|                        |              |             |             |
|------------------------|--------------|-------------|-------------|
| pcaec420.pcaec361      | 0.003126679  | 0.013816998 | 0.821311441 |
| lysopcac160.pcaec423   | 0.005460041  | 0.024134188 | 0.821354466 |
| histidine.c51          | -0.009463674 | 0.041830985 | 0.821355073 |
| serotonin.c3           | -0.001500414 | 0.006635279 | 0.821439849 |
| c51.isoleucine         | 0.003664785  | 0.016213548 | 0.821513194 |
| pcaac360.c51           | -0.00924422  | 0.040950453 | 0.821738836 |
| pcaac364.smc241        | -0.003299912 | 0.014619201 | 0.821752104 |
| pcaac424.kynurenine    | 0.002550676  | 0.011301914 | 0.821782498 |
| c0.pcaac421            | -0.008671943 | 0.038450711 | 0.821899973 |
| alanine.smc202         | -0.00793782  | 0.035204022 | 0.821941515 |
| phenylalanine.pcaac364 | -0.013693055 | 0.060733966 | 0.821957731 |
| serine.pcaac385        | -0.003347248 | 0.014847326 | 0.821969463 |
| pcaac424.smohc241      | -0.011164086 | 0.049523093 | 0.821979222 |
| pcaac405.pcaac424      | 0.001088207  | 0.004827521 | 0.821990587 |
| pcaec383.c3            | -0.00795438  | 0.03529165  | 0.822011863 |
| glutamicacid.c8        | 0.010125894  | 0.044972274 | 0.822191411 |
| pcaec445.pcaac343      | 0.004151667  | 0.018443686 | 0.822237157 |
| pcaac300.c16           | -0.008630103 | 0.038340386 | 0.822243342 |
| pcaec360.pcaac342      | 0.004963271  | 0.022080718 | 0.822486494 |
| serine.histidine       | -0.012272323 | 0.05464051  | 0.82262419  |
| c141oh.serotonin       | 0.008580712  | 0.03821041  | 0.822652465 |
| pcaec322.pcaac386      | -0.002438229 | 0.010858883 | 0.822673429 |
| c5.c162                | -0.018345818 | 0.08172484  | 0.822716128 |
| isoleucine.taurine     | -0.006986998 | 0.031132666 | 0.822759755 |
| methionine.pcaec385    | 0.008006886  | 0.035679447 | 0.822771305 |
| pcaec381.pcaec340      | -0.009059785 | 0.040409733 | 0.822937187 |
| c181.c4                | 0.006864138  | 0.030618941 | 0.822951634 |
| pcaac361.pcaac321      | -0.009016216 | 0.040220624 | 0.82295978  |
| pcaec321.pcaac344      | 0.01043364   | 0.046555691 | 0.823004842 |
| lysopcac170.pcaac404   | 0.000568516  | 0.002536989 | 0.823020305 |
| lysopcac203.isoleucine | 0.006851847  | 0.030577512 | 0.82302792  |
| pcaac364.pcaac384      | 0.015847407  | 0.07073798  | 0.823067961 |
| pcaac281.pcaec420      | 0.003279546  | 0.014648407 | 0.823180979 |
| pcaec343.lysopcac160   | -0.005597408 | 0.025001419 | 0.823181384 |
| pcaec386.asparagine    | -0.001949672 | 0.008709479 | 0.823202562 |
| asparticacid.glutamine | 0.003824096  | 0.017086157 | 0.823236605 |
| smc261.c142            | 0.009094564  | 0.040652808 | 0.82331384  |
| smc180.taurine         | 0.010898329  | 0.048719351 | 0.823327014 |
| c162.pcaec425          | -0.001038729 | 0.004644635 | 0.823370029 |
| lysopcac204.pcaec386   | 0.003052658  | 0.01365061  | 0.823379913 |
| smohc161.taurine       | 0.010527048  | 0.047094913 | 0.823457299 |
| glycine.asparagine     | -0.001662342 | 0.007440234 | 0.823536754 |
| lysopcac161.pcaec404   | -0.006758363 | 0.030252293 | 0.823556965 |
| pcaec300.isoleucine    | -0.004473235 | 0.020028342 | 0.823599501 |
| smohc222.c2            | -0.010833919 | 0.048532772 | 0.823689832 |

|                                     |              |             |             |
|-------------------------------------|--------------|-------------|-------------|
| pcaac406.smohc222                   | 0.001479441  | 0.006628612 | 0.823719949 |
| pcaac362.pcaac424                   | -0.002962495 | 0.013275927 | 0.823752807 |
| lysopcac170.c8                      | -0.008917731 | 0.040005835 | 0.82393698  |
| c5.pcaac426                         | 0.011756745  | 0.052759605 | 0.823994952 |
| pcaac404.pcaec405                   | 0.009156081  | 0.041100449 | 0.824043778 |
| smohc161.pcaec301                   | -0.011739537 | 0.052716521 | 0.824107055 |
| pcaac405.pcaec343                   | -0.019157476 | 0.086029535 | 0.824112434 |
| smohc161.pcaac406                   | -0.00807944  | 0.036293734 | 0.824168619 |
| lysopcac170.lysopcac161             | 0.013990907  | 0.062857162 | 0.824191925 |
| pcaec403.smohc141                   | -0.004984855 | 0.02240379  | 0.824255643 |
| c141oh.c2                           | 0.015126835  | 0.067987063 | 0.824259309 |
| phenylalanine.acetylnithoine        | -0.01867691  | 0.083956707 | 0.824288029 |
| pcaec341.pcaec382                   | -0.00319013  | 0.014349476 | 0.824398364 |
| pcaac281.pcaec386                   | -0.002749943 | 0.012372057 | 0.824434374 |
| smc160.c12                          | 0.010254624  | 0.046139289 | 0.824447442 |
| pcaec382.c162                       | -0.021847027 | 0.098327835 | 0.8245003   |
| pcaec343.taurine                    | -0.009941327 | 0.044752837 | 0.824536888 |
| smc181.pcaac424                     | -0.004077731 | 0.018358451 | 0.824553268 |
| pcaac364.pcaec421                   | 0.000235059  | 0.001058514 | 0.824594238 |
| pcaec383.c18                        | 0.00864281   | 0.038948952 | 0.824721407 |
| pcaac406.c142                       | 0.008867517  | 0.03996775  | 0.824747962 |
| pcaec365.pcaac343                   | 0.00461437   | 0.02079899  | 0.82475673  |
| serotonin.glutamine                 | 0.002537941  | 0.011441373 | 0.824783254 |
| methioninesulfoxide.threonine       | -0.005624217 | 0.02536202  | 0.824832922 |
| c16.alphaaminoadipicacid            | 0.001761713  | 0.007946089 | 0.824871232 |
| c8.c18                              | -0.005699439 | 0.025718899 | 0.824951299 |
| smc202.pcaec301                     | -0.011497452 | 0.051911125 | 0.825045853 |
| c51dc.c3                            | -0.01411826  | 0.063753334 | 0.825070775 |
| c51.pcaec423                        | 0.002477035  | 0.011190455 | 0.825147551 |
| lysopcac161.c182                    | 0.009240908  | 0.041764096 | 0.82521601  |
| lysopcac140.c2                      | -0.009279696 | 0.041957162 | 0.825288795 |
| pcaac405.pcaec444                   | 0.01701132   | 0.076927922 | 0.825317939 |
| pcaac300.smohc241                   | -0.008896568 | 0.040254601 | 0.82541566  |
| pcaac240.pcaec425                   | -0.000943628 | 0.0042705   | 0.825449225 |
| c181.pcaec381                       | 0.0111015    | 0.050264728 | 0.825529765 |
| phenylalanine.pcaac362              | -0.007611465 | 0.034480309 | 0.825617167 |
| lysopcac204.smc181                  | 0.003783795  | 0.017141218 | 0.825621578 |
| pcaec362.lysopcac281                | -0.005165405 | 0.023404833 | 0.82565597  |
| c16.pcaec446                        | 0.014267501  | 0.064683084 | 0.825751382 |
| smohc221.methionine                 | 0.004405193  | 0.019973123 | 0.825766456 |
| smc241.pcaac361                     | -0.011891023 | 0.053919228 | 0.825783609 |
| pcaac424.c102                       | -0.00687991  | 0.031203661 | 0.825822418 |
| pcaac343.taurine                    | 0.003019465  | 0.013698604 | 0.825871122 |
| lysine.lysopcac280                  | -0.002132619 | 0.009677043 | 0.825903905 |
| asparticacid.asymmetricdimethylargi | -0.003951614 | 0.017934073 | 0.825933506 |

|                           |              |             |             |
|---------------------------|--------------|-------------|-------------|
| c18.pcaac384              | 0.01023547   | 0.046457119 | 0.825949292 |
| pcaac426.smohc241         | -0.008439629 | 0.038308275 | 0.825959054 |
| pcaec401.pcaac425         | 0.020702661  | 0.094000321 | 0.826011847 |
| pcaec322.pcaec421         | -0.000415845 | 0.001888215 | 0.826018426 |
| pcaec342.c182             | 0.007779369  | 0.035328544 | 0.826042671 |
| pcaac384.lysine           | -0.01288289  | 0.058511258 | 0.826060309 |
| lysopcac204.pcaec406      | -0.013864053 | 0.063106251 | 0.826436628 |
| pcaac386.lysopcac182      | -0.00209461  | 0.009541599 | 0.8265686   |
| smohc141.c0               | 0.000106913  | 0.000487046 | 0.826576287 |
| c5.smc260                 | 0.010043141  | 0.045758232 | 0.826600724 |
| isoleucine.pcaac420       | -0.011253011 | 0.051307081 | 0.82672203  |
| lysopcac281.pcaec382      | -0.005990484 | 0.027320877 | 0.826770765 |
| pcaec384.acetylmethionine | -0.012790296 | 0.058334852 | 0.826776559 |
| asparticacid.pcaac361     | 0.011110666  | 0.050697895 | 0.826855959 |
| h1.pcaac420               | -0.0229356   | 0.104670784 | 0.826881658 |
| serotonin.pcaec421        | 0.001124299  | 0.005131682 | 0.826906118 |
| smohc221.serotonin        | 0.015739508  | 0.071840598 | 0.826906531 |
| pcaac341.pcaac426         | 0.011740393  | 0.053588097 | 0.826909246 |
| lysopcac182.pcaec446      | -0.005533375 | 0.025258428 | 0.826921216 |
| c182.smc260               | -0.003068186 | 0.014012182 | 0.827002689 |
| pcaac361.pcaec365         | -0.004732594 | 0.021614324 | 0.827009876 |
| alphaaminoacid.pcaac322   | -0.009716033 | 0.044375044 | 0.827012801 |
| pcaec384.pcaac426         | -0.009306895 | 0.042524128 | 0.82708364  |
| pcaac403.pcaac383         | 0.001218841  | 0.005569246 | 0.827091002 |
| c181.pcaac323             | -0.013437526 | 0.061410365 | 0.827119586 |
| lysopcac203.pcaac300      | -0.008199828 | 0.037480215 | 0.827148961 |
| c51.methionine            | -0.003416051 | 0.01561441  | 0.827150484 |
| leucine.c142              | -0.012878822 | 0.058881332 | 0.827189742 |
| pcaec443.pcaec365         | -0.005797766 | 0.026510224 | 0.827209805 |
| pcaac402.smc160           | -0.011378885 | 0.052053642 | 0.827287568 |
| pcaac321.c12              | 0.006619675  | 0.030285875 | 0.827307941 |
| smohc222.pcaac361         | -0.009166269 | 0.041938109 | 0.827312951 |
| pcaac383.c101             | 0.001442569  | 0.006600582 | 0.827324502 |
| smc260.pcaec386           | -0.001926952 | 0.00881692  | 0.827324601 |
| pcaec383.pcaec403         | -0.025018584 | 0.114477634 | 0.827329246 |
| pcaec343.pcaac361         | -0.012984384 | 0.059423016 | 0.827358753 |
| prolinr.c102              | -0.004615105 | 0.021129082 | 0.827423581 |
| prolinr.pcaec363          | 0.004899711  | 0.022440231 | 0.82748527  |
| pcaac364.pcaac366         | 0.002105915  | 0.00964665  | 0.827516098 |
| pcaac240.ornithine        | 0.016959677  | 0.077713878 | 0.827572864 |
| pcaec383.kynurenine       | 0.001489171  | 0.006824423 | 0.827588695 |
| pcaec322.smc240           | 0.006615062  | 0.030315533 | 0.8275925   |
| pcaec422.c182             | 0.004422612  | 0.020269621 | 0.827606375 |
| pcaec445.c12              | 0.007043672  | 0.03229668  | 0.827681354 |
| serotonin.leucine         | 0.005365538  | 0.024602287 | 0.8276827   |

|                                    |              |             |             |
|------------------------------------|--------------|-------------|-------------|
| pcaec385.smc260                    | 0.005224794  | 0.023957161 | 0.827684243 |
| pcaec382.alanine                   | 0.004340179  | 0.019913429 | 0.827790524 |
| smc180.pcaac240                    | -0.001963882 | 0.009011105 | 0.827799979 |
| c162.serotonin                     | 0.011890967  | 0.054578675 | 0.827855836 |
| pcaec321.pcaec301                  | -0.010301921 | 0.047314532 | 0.827961343 |
| c51dc.pcaac321                     | -0.009520729 | 0.043736786 | 0.828000447 |
| pcaec425.leucine                   | -0.006350096 | 0.029202911 | 0.828183251 |
| c51.arginine                       | 0.003195214  | 0.01469709  | 0.828216535 |
| lysopcac180.pcaec405               | -0.007920992 | 0.036444349 | 0.828262956 |
| pcaec385.pcaec322                  | -0.014365679 | 0.06612305  | 0.828331479 |
| pcaec360.smc261                    | 0.009343817  | 0.043014613 | 0.828356764 |
| glutamine.smc161                   | -0.009476495 | 0.043626051 | 0.828359283 |
| lysopcac182.pcaac361               | -0.008509338 | 0.039176205 | 0.828370336 |
| arginine.c101                      | 0.001265665  | 0.005828681 | 0.828418985 |
| c16.lysopcac281                    | 0.002671133  | 0.012303637 | 0.828452554 |
| smc261.valine                      | 0.007953336  | 0.036635509 | 0.828458332 |
| pcaac362.asparagine                | 0.003330743  | 0.015349507 | 0.828536245 |
| pcaac381.pcaac420                  | 0.022255123  | 0.102608119 | 0.828613326 |
| lysopcac180.asymmetricdimethylarg  | -0.00352427  | 0.016249709 | 0.828622901 |
| pcaec403.smohc241                  | -0.012566928 | 0.057952852 | 0.828649815 |
| pcaec362.alphaaminoadipicacid      | -0.001317693 | 0.006080518 | 0.828758752 |
| pcaac322.pcaac384                  | -0.012355058 | 0.057037839 | 0.828833262 |
| kynurenine.methionine              | -0.00585925  | 0.027052963 | 0.828854411 |
| pcaec362.pcaac362                  | 0.002634566  | 0.012166094 | 0.828881255 |
| pcaec364.pcaec382                  | -0.006078443 | 0.028088467 | 0.828995133 |
| c14.h1                             | 0.000433537  | 0.002004401 | 0.829081435 |
| asparagine.pcaac363                | -0.001696955 | 0.007846134 | 0.829091869 |
| pcaac366.asymmetricdimethylarginir | 0.005108464  | 0.023625139 | 0.829130106 |
| pcaac401.kynurenine                | 0.002315652  | 0.010711975 | 0.829173556 |
| pcaec321.pcaec402                  | 0.010359372  | 0.047927635 | 0.829195347 |
| pcaec384.pcaac300                  | -0.011081258 | 0.051277549 | 0.829228496 |
| pcaec341.pcaac300                  | -0.013809294 | 0.063936046 | 0.829319874 |
| pcaac406.c101                      | 0.002002504  | 0.009275037 | 0.829384833 |
| pcaac404.h1                        | -0.000263666 | 0.001221311 | 0.829396611 |
| smc261.taurine                     | 0.005735815  | 0.026576591 | 0.829447427 |
| pcaec382.lysopcac140               | 0.000398271  | 0.001845559 | 0.829464803 |
| smohc221.pcaec300                  | -0.017428197 | 0.080802717 | 0.829551543 |
| c16.pcaec386                       | -0.00132046  | 0.006122689 | 0.829568373 |
| pcaac386.c51                       | -0.013624699 | 0.063186659 | 0.829599828 |
| pcaec401.putrescine                | 0.009650911  | 0.044759861 | 0.829608308 |
| pcaac421.pcaac380                  | -0.017986855 | 0.083471303 | 0.829709298 |
| pcaac402.pcaac240                  | 0.005106536  | 0.023698045 | 0.829710905 |
| smohc161.pcaac240                  | 0.001678812  | 0.00779736  | 0.829849623 |
| lysopcac180.c10                    | -0.006699345 | 0.031116137 | 0.829852601 |
| pcaac383.pcaac322                  | -0.012969436 | 0.060239585 | 0.829855511 |



|                              |              |             |             |
|------------------------------|--------------|-------------|-------------|
| c16.prolinr                  | -0.005492822 | 0.02551329  | 0.82985938  |
| phenylalanine.pcaec423       | 0.001400631  | 0.006505824 | 0.829862341 |
| h1.pcaec385                  | 0.012517139  | 0.058155879 | 0.829904749 |
| pcaac424.pcaac240            | 0.004464915  | 0.020749563 | 0.829946075 |
| c182.c16                     | -0.009670362 | 0.044944232 | 0.829959749 |
| pcaac403.glutamicacid        | -0.016144569 | 0.07504481  | 0.829984029 |
| leucine.pcaac366             | -0.003614839 | 0.016803316 | 0.829988594 |
| lysopcac161.pcaac342         | -0.001406414 | 0.006538621 | 0.830014369 |
| pcaac385.pcaec403            | -0.004677788 | 0.021748485 | 0.830020354 |
| pcaac401.glycine             | -0.002977904 | 0.013850262 | 0.830081531 |
| pcaac402.c182                | -0.009829692 | 0.04572518  | 0.830107824 |
| arginine.lysopcac180         | -0.007491182 | 0.034856784 | 0.830154612 |
| pcaec445.lysopcac281         | 0.001682465  | 0.007835655 | 0.83030561  |
| pcaec362.pcaac424            | -0.001745845 | 0.008131049 | 0.830310062 |
| pcaac380.pcaac426            | -0.010344618 | 0.048188294 | 0.830343226 |
| pcaec425.pcaac344            | -0.007470271 | 0.034814707 | 0.830419867 |
| c51.pcaac420                 | -0.012734361 | 0.059352082 | 0.830432334 |
| serine.c12                   | 0.010628816  | 0.049563246 | 0.830515376 |
| pcaec403.c182                | -0.009201859 | 0.042914977 | 0.830537823 |
| methioninesulfoxide.smc180   | 0.000499031  | 0.002327591 | 0.830555337 |
| pcaec364.pcaec385            | -0.024069875 | 0.112407196 | 0.830763212 |
| pcaec420.pcaec385            | -0.008994907 | 0.042014668 | 0.830795432 |
| pcaac406.lysopcac182         | -0.001772734 | 0.008281147 | 0.830811752 |
| pcaec361.smohc221            | -0.013738002 | 0.064177457 | 0.830816405 |
| pcaec383.alanine             | 0.003719061  | 0.017373728 | 0.830816706 |
| pcaec402.c3                  | -0.004436    | 0.020725876 | 0.83084034  |
| pcaac426.pcaec341            | -0.009485092 | 0.044320964 | 0.830858105 |
| pcaec383.pcaec384            | -0.005557544 | 0.025971362 | 0.830875049 |
| pcaac421.pcaec341            | 0.00517272   | 0.024175639 | 0.830893142 |
| c181.methioninesulfoxide     | 0.00221661   | 0.010364241 | 0.830965685 |
| pcaec420.pcaec343            | -0.009406203 | 0.044000648 | 0.831040966 |
| pcaac343.pcaac342            | -0.001547875 | 0.007241832 | 0.831066998 |
| c16.c141oh                   | -0.011751692 | 0.054983848 | 0.831075453 |
| kynurenine.h1                | -0.000352317 | 0.001648573 | 0.831090666 |
| histidine.asparagine         | -0.004961654 | 0.023220054 | 0.831114511 |
| pcaac240.lysopcac181         | 0.010217058  | 0.047821041 | 0.831136122 |
| c14.c182                     | 0.007035249  | 0.032936731 | 0.831177425 |
| smc260.c102                  | -0.006247978 | 0.029263235 | 0.83124701  |
| pcaec422.methioninesulfoxide | 0.002539649  | 0.011897238 | 0.831281322 |
| lysopcac161.smc241           | 0.012197057  | 0.05715459  | 0.831328579 |
| pcaec422.lysine              | 0.015780424  | 0.073953783 | 0.831346052 |
| smohc221.pcaac344            | 0.011025049  | 0.051684272 | 0.8313981   |
| ornithine.c51dc              | 0.018359239  | 0.086066785 | 0.831399269 |
| c141.putrescine              | 0.005957259  | 0.027927554 | 0.831401377 |
| c181.isoleucine              | -0.003456518 | 0.016204285 | 0.831403121 |

|                                |              |             |             |
|--------------------------------|--------------|-------------|-------------|
| smc260.pcaac406                | -0.005510922 | 0.025840053 | 0.831432984 |
| pcaec406.serine                | 0.016397957  | 0.076923909 | 0.831510369 |
| acetylorithoine.pcaac426       | 0.003666119  | 0.017205341 | 0.831581081 |
| c0.arginine                    | -0.006715253 | 0.031518181 | 0.831597136 |
| pcaec342.pcaac380              | -0.01954876  | 0.091797612 | 0.83167862  |
| asymmetricdimethylarginine.c10 | -0.003758194 | 0.017655864 | 0.83175404  |
| c101.isoleucine                | 0.004158302  | 0.019537978 | 0.831774586 |
| methioninesulfoxide.glycine    | -0.003101041 | 0.014574109 | 0.831816857 |
| pcaac380.pcaac320              | 0.02384856   | 0.112086157 | 0.831822714 |
| lysopcac280.smohc222           | 0.001444903  | 0.006791141 | 0.831828106 |
| arginine.isoleucine            | -0.005026793 | 0.02362847  | 0.831843593 |
| smohc161.pcaec421              | 0.000223636  | 0.001051342 | 0.831865342 |
| pcaec401.smc202                | 0.007095833  | 0.03335933  | 0.831870052 |
| lysopcac180.pcaec342           | -0.015855531 | 0.074552575 | 0.831895943 |
| pcaac366.serine                | 0.012253271  | 0.057633351 | 0.831949292 |
| c141.smc261                    | 0.008527908  | 0.040112504 | 0.831955184 |
| pcaac401.pcaac364              | 0.010455167  | 0.049210397 | 0.832065141 |
| c0.smc161                      | 0.015202286  | 0.071560269 | 0.832079293 |
| c101.lysine                    | -0.00916425  | 0.043155103 | 0.832144848 |
| smc240.pcaac363                | -0.001667737 | 0.007854034 | 0.832156281 |
| pcaac320.glutamicacid          | -0.007616864 | 0.035884567 | 0.832219545 |
| pcaac420.asparagine            | -0.002225114 | 0.01048679  | 0.832279929 |
| pcaac360.pcaac422              | -0.010640246 | 0.0501722   | 0.832364071 |
| pcaac322.lysine                | -0.011305676 | 0.0533193   | 0.832393134 |
| c162.valine                    | -0.009995163 | 0.047143666 | 0.832410453 |
| pcaec424.glutamicacid          | 0.013603765  | 0.064181531 | 0.832455108 |
| c0.ornithine                   | 0.001900819  | 0.008969599 | 0.832485963 |
| pcaec386.smc160                | -0.027758614 | 0.131018222 | 0.832524617 |
| pcaac364.pcaec384              | -0.004915474 | 0.023205736 | 0.832561081 |
| c101.pcaac426                  | -0.008079845 | 0.038152102 | 0.832593561 |
| pcaac386.pcaac383              | -0.002092748 | 0.009882278 | 0.832602938 |
| c16.pcaec384                   | -0.004620215 | 0.021822559 | 0.832642175 |
| lysopcac140.pcaec362           | -0.003875275 | 0.018310612 | 0.832701691 |
| c51.lysopcac203                | 0.001759746  | 0.008315222 | 0.832710645 |
| c12.c141oh                     | -0.024739565 | 0.116921411 | 0.832740266 |
| pcaac365.prolinr               | 0.006473308  | 0.030596423 | 0.832756356 |
| smc240.lysopcac180             | 0.008163156  | 0.038618736 | 0.832906337 |
| isoleucine.histidine           | 0.015302958  | 0.07241     | 0.832937868 |
| smohc221.pcaac363              | 0.001356817  | 0.006420974 | 0.832959306 |
| c14.asymmetricdimethylarginine | 0.002624372  | 0.012420329 | 0.83296988  |
| pcaac384.pcaec425              | 0.000761293  | 0.003603    | 0.832971684 |
| c162.tyrosine                  | -0.007895555 | 0.037368948 | 0.832977684 |
| pcaac426.c51                   | -0.010600922 | 0.050184148 | 0.833013547 |
| c18.alphaaminoadipicacid       | 0.000747718  | 0.00354192  | 0.833118789 |
| glutamicacid.smohc241          | 0.013556654  | 0.06425665  | 0.833218974 |

|                             |              |             |             |
|-----------------------------|--------------|-------------|-------------|
| pcaec340.smohc222           | 0.000937729  | 0.004444722 | 0.833219573 |
| pcaec343.pcaac381           | -0.00660139  | 0.031298496 | 0.833265309 |
| c10.kynurenine              | 0.001276659  | 0.006053281 | 0.833275905 |
| c102.smc261                 | 0.005132994  | 0.024338768 | 0.833280356 |
| pcaac341.c14                | 0.013159049  | 0.062411792 | 0.83332357  |
| creatinine.putrescine       | 0.004192459  | 0.019895678 | 0.833417226 |
| pcaec402.smc180             | 0.000656139  | 0.003114178 | 0.833439096 |
| pcaac422.pcaac342           | -0.003053764 | 0.014494638 | 0.833448207 |
| pcaec341.pcaec421           | -0.000319547 | 0.001517177 | 0.833497014 |
| pcaec420.glutamicacid       | -0.009536921 | 0.045286094 | 0.833518013 |
| pcaac383.ornithine          | -0.004548912 | 0.021620953 | 0.833673025 |
| c182.pcaec420               | 0.002912069  | 0.013841064 | 0.833673208 |
| pcaac380.pcaec422           | -0.003335363 | 0.015853371 | 0.833677225 |
| pcaec381.glycine            | -0.002185852 | 0.010393597 | 0.833740114 |
| lysopcac140.smohc141        | -0.005269898 | 0.025083446 | 0.833905936 |
| smc181.lysopcac281          | -0.002864724 | 0.013646391 | 0.834037793 |
| pcaac281.c8                 | 0.008155376  | 0.038854863 | 0.834062765 |
| pcaac406.pcaac364           | -0.007822903 | 0.037273389 | 0.834073889 |
| h1.lysine                   | -0.008508087 | 0.040549441 | 0.834119813 |
| glycine.pcaec380            | -0.00966551  | 0.046071746 | 0.83414123  |
| pcaec364.phenylalanine      | 0.005169852  | 0.024651123 | 0.834197167 |
| pcaec364.pcaac425           | -0.014887547 | 0.070989543 | 0.834201931 |
| pcaec402.c182               | -0.006126801 | 0.029220014 | 0.834230305 |
| isoleucine.serine           | -0.010047085 | 0.047929259 | 0.834273164 |
| pcaac322.alanine            | -0.00710044  | 0.033872779 | 0.834275033 |
| histidine.pcaec342          | 0.014030343  | 0.066952835 | 0.834325816 |
| pcaec404.c142               | 0.006542819  | 0.031223036 | 0.834329394 |
| smc180.pcaec382             | 0.001574182  | 0.007514494 | 0.834380002 |
| pcaec446.pcaac360           | -0.006162679 | 0.029420286 | 0.834392201 |
| pcaec445.pcaac384           | -0.014122411 | 0.067430177 | 0.834417795 |
| smohc241.pcaec362           | -0.006089149 | 0.029080992 | 0.834458062 |
| pcaec424.pcaec420           | 0.003920333  | 0.018727633 | 0.834498356 |
| pcaac361.pcaac342           | -0.00130936  | 0.00625909  | 0.83460799  |
| pcaec341.pcaac406           | -0.006628901 | 0.031691063 | 0.834624231 |
| c18.smc181                  | 0.004750527  | 0.022712606 | 0.834635464 |
| c14.methioninesulfoxide     | 0.00330231   | 0.015788591 | 0.834635602 |
| c182.alphaaminoacidipicacid | 0.000734086  | 0.003512105 | 0.834746214 |
| pcaec423.smohc141           | -0.005492978 | 0.026282608 | 0.834761252 |
| c12.arginine                | 0.003517183  | 0.016844335 | 0.834910517 |
| smc240.pcaac281             | -0.000928833 | 0.004448578 | 0.834919785 |
| c142.smohc221               | 0.012424048  | 0.059515917 | 0.834952142 |
| c141oh.threonine            | 0.006276915  | 0.03008008  | 0.835013085 |
| smc241.lysopcac204          | 0.005252627  | 0.025172414 | 0.8350189   |
| pcaac365.c141oh             | 0.013310972  | 0.063798324 | 0.83503807  |
| smc261.lysopcac204          | -0.005887563 | 0.028219928 | 0.835045864 |

|                                      |              |             |             |
|--------------------------------------|--------------|-------------|-------------|
| c142.c4                              | -0.003264357 | 0.015663948 | 0.835226682 |
| pcaec404.smc160                      | 0.009621821  | 0.046177143 | 0.835251399 |
| c101.threonine                       | 0.004300277  | 0.020643345 | 0.835293943 |
| pcaec425.lysopcac281                 | 0.001683442  | 0.008082612 | 0.835320076 |
| pcaac362.c8                          | 0.006244299  | 0.029998727 | 0.835419309 |
| pcaac364.pcaac426                    | -0.010507311 | 0.050540442 | 0.835616511 |
| c2.pcaec386                          | -0.000977785 | 0.004703474 | 0.835626877 |
| histidine.asymmetricdimethylarginine | -0.0026365   | 0.012685946 | 0.835671586 |
| pcaac343.smc260                      | 0.004544073  | 0.021866946 | 0.835689369 |
| serotonin.c8                         | -0.009222723 | 0.044388688 | 0.835715608 |
| pcaec365.pcaac383                    | 0.000842863  | 0.00405698  | 0.835727861 |
| c10.lysopcac180                      | 0.010708846  | 0.051547577 | 0.835735149 |
| pcaac320.isoleucine                  | -0.005229975 | 0.025182305 | 0.835783713 |
| c182.pcaac386                        | 0.00190637   | 0.009179468 | 0.835789116 |
| asymmetricdimethylarginine.pcaec42   | 0.000694357  | 0.00334607  | 0.835916459 |
| c3.asparagine                        | 0.001947029  | 0.009383375 | 0.835929293 |
| smc181.pcaac422                      | -0.009269769 | 0.044682228 | 0.835958802 |
| pcaac421.pcaac424                    | -0.002203109 | 0.010622369 | 0.836003275 |
| ornithine.alphaaminoadipicacid       | 0.001279165  | 0.00616754  | 0.836003295 |
| pcaac323.c4                          | -0.001785273 | 0.008614907 | 0.836137414 |
| c162.pcaec301                        | -0.012963744 | 0.062557807 | 0.836139315 |
| pcaac364.pcaec386                    | 0.007155249  | 0.034529692 | 0.836145603 |
| pcaec341.pcaac344                    | 0.011083736  | 0.053501479 | 0.836187118 |
| smohc222.pcaac386                    | -0.001918955 | 0.00927183  | 0.836343575 |
| asparticacid.threonine               | 0.007048643  | 0.034066672 | 0.836389469 |
| smc240.pcaac321                      | -0.003184337 | 0.015391037 | 0.836398624 |
| smc240.pcaec386                      | 0.001994962  | 0.009646334 | 0.836464994 |
| pcaec362.pcaec403                    | -0.006191964 | 0.029945336 | 0.836492139 |
| smohc222.c182                        | -0.004101181 | 0.019834869 | 0.836499401 |
| c14.pcaec421                         | -0.000669302 | 0.00323794  | 0.836546144 |
| c181.pcaec363                        | -0.003146969 | 0.015225937 | 0.83656292  |
| pcaac383.pcaec402                    | -0.005651373 | 0.027379032 | 0.836775179 |
| glutamicacid.smc160                  | -0.011233714 | 0.054448674 | 0.836849216 |
| c12.pcaac366                         | -0.004690398 | 0.022740795 | 0.836898101 |
| smc202.pcaac383                      | -0.000775384 | 0.003759547 | 0.836906578 |
| putrescine.pcaec424                  | -0.012244471 | 0.059393733 | 0.836973837 |
| glutamicacid.c5                      | 0.002868254  | 0.013915273 | 0.83700104  |
| lysopcac160.c162                     | -0.013814724 | 0.067038352 | 0.83704063  |
| pcaac404.pcaec343                    | 0.011573801  | 0.056175123 | 0.837072775 |
| ornithine.serotonin                  | 0.014843887  | 0.07204971  | 0.837078905 |
| pcaac384.pcaac426                    | 0.008817638  | 0.042802319 | 0.837090151 |
| pcaec446.pcaac383                    | 0.001215473  | 0.00590145  | 0.837126496 |
| lysopcac204.pcaec360                 | 0.000999232  | 0.004852611 | 0.837161908 |
| citruiline.pcaac360                  | -0.006394734 | 0.03106804  | 0.83722928  |
| pcaec362.lysopcac280                 | -0.001585    | 0.007703094 | 0.837282675 |

|                           |              |             |             |
|---------------------------|--------------|-------------|-------------|
| pcaec406.pcaac364         | -0.007871966 | 0.038275573 | 0.837357478 |
| putrescine.c162           | -0.013559089 | 0.065949154 | 0.837409238 |
| glutamicacid.pcaac323     | 0.017432505  | 0.084802503 | 0.837435135 |
| pcaac360.pcaac406         | 0.010809226  | 0.052585068 | 0.837442136 |
| acetylmethionine.pcaac323 | -0.003614333 | 0.017584818 | 0.837457585 |
| lysopcaac182.c8           | -0.009094983 | 0.044271095 | 0.837534558 |
| h1.pcaac300               | -0.009487388 | 0.046195855 | 0.837585445 |
| h1.pcaac363               | 0.005912053  | 0.028788029 | 0.837591807 |
| leucine.pcaac425          | -0.015556922 | 0.075755523 | 0.837598085 |
| pcaec365.c101             | -0.002138802 | 0.010419363 | 0.837664422 |
| c51dc.pcaac401            | -0.013841893 | 0.067443083 | 0.837690708 |
| pcaec340.pcaec401         | -0.00781951  | 0.03810603  | 0.837717327 |
| pcaec301.c142             | 0.005032845  | 0.02453523  | 0.837777152 |
| pcaec301.pcaac420         | -0.011628372 | 0.056702356 | 0.83781604  |
| smohc221.pcaac281         | -0.000769568 | 0.003753854 | 0.837870635 |
| pcaac401.pcaac425         | -0.022342163 | 0.108985058 | 0.837874772 |
| smc240.smc260             | -0.007819454 | 0.038183354 | 0.838042489 |
| pcaec360.ornithine        | -0.005907008 | 0.028850217 | 0.838073333 |
| pcaac320.pcaec423         | 0.00107914   | 0.005270876 | 0.838081986 |
| methionine.pcaac383       | 0.000888691  | 0.004341964 | 0.838129993 |
| pcaac381.lysopcaac281     | -0.006107521 | 0.029844519 | 0.838153491 |
| pcaec444.pcaac320         | -0.004382867 | 0.021434023 | 0.838280518 |
| pcaac343.pcaec385         | 0.007008166  | 0.034275283 | 0.838291988 |
| smohc141.pcaac320         | 0.014480969  | 0.070833524 | 0.838315684 |
| pcaac420.serotonin        | 0.020621945  | 0.100915012 | 0.838383553 |
| pcaec420.isoleucine       | 0.004133483  | 0.020227928 | 0.838386893 |
| c14.pcaec423              | 0.001979368  | 0.009689261 | 0.8384342   |
| smohc222.pcaec383         | -0.010357537 | 0.050709089 | 0.838458091 |
| pcaac323.smc260           | 0.004402818  | 0.02155636  | 0.838463735 |
| acetylmethionine.pcaac321 | -0.005764871 | 0.028229697 | 0.838490116 |
| pcaac300.pcaac363         | 0.002262169  | 0.011079155 | 0.838513943 |
| asparticacid.c182         | 0.007589904  | 0.037217217 | 0.838706688 |
| pcaec340.pcaec380         | -0.00792422  | 0.038863302 | 0.838734364 |
| lysopcaac280.pcaec340     | 0.00757401   | 0.037158466 | 0.838788809 |
| pcaec404.pcaac320         | -0.011099298 | 0.054456081 | 0.838795765 |
| prolinr.c51               | 0.004939969  | 0.024238699 | 0.838808281 |
| pcaec425.ornithine        | -0.006006651 | 0.029486439 | 0.838883234 |
| c18.pcaac420              | 0.020942552  | 0.102808576 | 0.83888683  |
| acetylmethionine.pcaac321 | 0.006457619  | 0.031706059 | 0.838912472 |
| pcaac422.c182             | 0.007743127  | 0.038018651 | 0.838916304 |
| lysopcaac170.lysopcaac204 | 0.004637054  | 0.022769368 | 0.838926744 |
| pcaec384.smc240           | 0.003298034  | 0.016195275 | 0.838935663 |
| lysopcaac281.smc240       | -0.007624327 | 0.037444633 | 0.838955704 |
| methionine.pcaec386       | -0.000683205 | 0.00335769  | 0.839065791 |
| smohc161.c142             | 0.010551596  | 0.051876096 | 0.839124232 |

|                                    |              |             |             |
|------------------------------------|--------------|-------------|-------------|
| pcaec401.smc161                    | -0.013536457 | 0.066562903 | 0.83915276  |
| pcaac320.pcaec365                  | 0.004444418  | 0.021876955 | 0.839315126 |
| smc241.pcaec384                    | 0.018615543  | 0.091764875 | 0.839544406 |
| c18.asymmetricdimethylarginine     | 0.004199469  | 0.020710345 | 0.839614414 |
| pcaec340.pcaec421                  | 0.000231784  | 0.001143764 | 0.839709371 |
| smc181.smohc241                    | 0.014968737  | 0.073878506 | 0.839738208 |
| pcaec444.pcaec403                  | -0.008257046 | 0.040753658 | 0.839741475 |
| pcaec364.lysopcac280               | 0.001728208  | 0.008532826 | 0.839797879 |
| asymmetricdimethylarginine.glutami | 0.001786568  | 0.008821607 | 0.839809242 |
| smohc161.pcaec365                  | 0.004649984  | 0.022979017 | 0.839937174 |
| lysopcac280.c162                   | 0.012556647  | 0.06208511  | 0.840022148 |
| isoleucine.lysine                  | 0.020696112  | 0.102334618 | 0.840029429 |
| smc261.pcaac401                    | -0.001123351 | 0.005557247 | 0.84010589  |
| arginine.pcaec361                  | 0.001416861  | 0.007009617 | 0.840114146 |
| pcaec380.threonine                 | -0.005289084 | 0.026166766 | 0.840115075 |
| pcaac321.pcaec425                  | -0.001321523 | 0.006538784 | 0.840134203 |
| pcaac300.pcaec421                  | 0.000398505  | 0.001972079 | 0.840159147 |
| c12.pcaac360                       | -0.005498509 | 0.02721906  | 0.840208959 |
| pcaec406.smc180                    | 0.004367689  | 0.021626321 | 0.840246246 |
| pcaec300.pcaac424                  | 0.002985143  | 0.014782    | 0.840259725 |
| smc161.lysopcac281                 | 0.00185505   | 0.009190041 | 0.840330018 |
| lysopcac280.pcaec301               | 0.011207243  | 0.055522166 | 0.840332088 |
| pcaec446.threonine                 | 0.002433449  | 0.012063467 | 0.840434413 |
| pcaac281.tyrosine                  | 0.007653195  | 0.037943999 | 0.840452696 |
| smc240.pcaac426                    | -0.004996271 | 0.024777951 | 0.840495841 |
| pcaec424.c12                       | 0.008062222  | 0.039988553 | 0.840518145 |
| lysopcac160.c3                     | -0.00560509  | 0.027814607 | 0.840593986 |
| smohc241.glutamicacid              | -0.005060929 | 0.025128406 | 0.84068241  |
| smohc161.pcaac386                  | -0.001966783 | 0.009765851 | 0.840689274 |
| pcaac341.c12                       | 0.007960951  | 0.039530302 | 0.840693452 |
| pcaac422.tyrosine                  | -0.008677411 | 0.043094944 | 0.840719141 |
| alanine.pcaec362                   | -0.002480505 | 0.012324439 | 0.840788212 |
| smc180.pcaec340                    | 0.013908432  | 0.069122216 | 0.840828838 |
| lysopcac204.pcaac383               | 0.001002836  | 0.004983924 | 0.840829649 |
| asparticacid.smc181                | 0.001106047  | 0.005497975 | 0.84086119  |
| pcaec402.ornithine                 | -0.005492356 | 0.027304509 | 0.840878072 |
| c5.pcaac420                        | 0.016081808  | 0.079968782 | 0.840917807 |
| pcaec341.pcaec386                  | -0.000770645 | 0.003833551 | 0.840976126 |
| creatinine.pcaac300                | -0.006847507 | 0.034078946 | 0.841050742 |
| c10.pcaac363                       | 0.001717525  | 0.008548364 | 0.841060258 |
| asymmetricdimethylarginine.pcaac36 | -0.005751302 | 0.028630351 | 0.841089312 |
| h1.pcaec420                        | -0.012900813 | 0.064223582 | 0.84109544  |
| glutamicacid.pcaec443              | 0.016359163  | 0.081440435 | 0.841095996 |
| pcaec343.pcaec444                  | 0.017756441  | 0.088398919 | 0.841100339 |
| pcaec365.pcaac360                  | 0.007590835  | 0.037795385 | 0.841121343 |

|                         |              |             |             |
|-------------------------|--------------|-------------|-------------|
| pcaec363.c12            | 0.011024299  | 0.054896511 | 0.84113741  |
| prolinr.pcaec386        | -0.001554472 | 0.007742757 | 0.841180376 |
| lysopcac180.c3          | -0.00488983  | 0.024363233 | 0.841226658 |
| pcaac424.pcaac406       | 0.011479361  | 0.057202726 | 0.841247528 |
| histidine.pcaac421      | 0.005347415  | 0.026651821 | 0.841277822 |
| glycine.pcaac385        | -0.005091196 | 0.025384995 | 0.841340628 |
| pcaac406.pcaec401       | -0.008818132 | 0.043973769 | 0.841362193 |
| smohc222.c0             | -0.000206903 | 0.001032073 | 0.841407875 |
| c142.smc261             | -0.004422449 | 0.022063385 | 0.841431467 |
| pcaec420.pcaec362       | 0.001775856  | 0.008864736 | 0.84152103  |
| pcaac404.smc261         | -0.006809675 | 0.033995465 | 0.841534184 |
| c141.pcaac321           | 0.00514002   | 0.025665507 | 0.841566754 |
| lysopcac203.pcaac343    | -0.007163825 | 0.035783014 | 0.841619609 |
| pcaac406.c12            | -0.010033198 | 0.050183192 | 0.841830657 |
| lysopcac281.smc181      | -0.00164228  | 0.008221398 | 0.841967013 |
| lysopcac182.smc241      | -0.008633338 | 0.04322527  | 0.841988719 |
| pcaec343.pcaec301       | -0.008126496 | 0.040697039 | 0.842024793 |
| pcaac421.smc240         | 0.007198559  | 0.036052382 | 0.842035181 |
| c14.smohc221            | 0.015446972  | 0.077384959 | 0.842079954 |
| kynurenine.pcaac383     | 0.000782598  | 0.003920793 | 0.842087857 |
| pcaac424.c142           | 0.006923979  | 0.034692001 | 0.842101633 |
| pcaac401.smohc141       | -0.005158201 | 0.025848768 | 0.842126015 |
| lysopcac140.smc261      | 0.005007358  | 0.025094823 | 0.842138177 |
| c51.pcaac405            | -0.006467415 | 0.032425181 | 0.842201356 |
| histidine.pcaac403      | 0.001070486  | 0.005368706 | 0.842250444 |
| pcaac381.smc180         | 0.000603295  | 0.003026266 | 0.842282278 |
| pcaec384.pcaec383       | -0.011506884 | 0.057769344 | 0.842412036 |
| pcaec384.c4             | 0.006658196  | 0.033435783 | 0.84245329  |
| pcaec445.c4             | -0.002829925 | 0.014214743 | 0.842492378 |
| pcaac341.valine         | 0.007854595  | 0.039465811 | 0.842539993 |
| pcaac344.pcaec340       | -0.008567361 | 0.043064292 | 0.842601888 |
| pcaac383.smohc141       | -0.003661656 | 0.018415655 | 0.842687474 |
| pcaac344.pcaac426       | 0.014546854  | 0.073198821 | 0.842768011 |
| c0.pcaac422             | -0.005549865 | 0.027956263 | 0.842932863 |
| pcaec340.c16            | 0.010631804  | 0.053577813 | 0.842997585 |
| pcaac381.lysopcac182    | -0.002962661 | 0.014953252 | 0.843238429 |
| lysopcac181.lysopcac160 | 0.003151603  | 0.015912697 | 0.84329494  |
| pcaac386.pcaec403       | -0.003792597 | 0.019154448 | 0.843337898 |
| pcaec405.glycine        | 0.005538802  | 0.027988273 | 0.843418792 |
| pcaac240.pcaec385       | -0.012613764 | 0.063739059 | 0.843419042 |
| pcaec420.c14            | 0.005604422  | 0.02832422  | 0.843442582 |
| pcaec403.smc180         | 0.00060275   | 0.003047974 | 0.843530518 |
| pcaac421.pcaac384       | 0.005591113  | 0.028274114 | 0.843536361 |
| pcaec425.pcaec341       | 0.003603587  | 0.018227391 | 0.843571462 |
| histidine.lysopcac281   | -0.001276003 | 0.006455188 | 0.843595588 |

|                                    |              |             |             |
|------------------------------------|--------------|-------------|-------------|
| isoleucine.pcaec363                | -0.004953818 | 0.025079502 | 0.843709818 |
| c2.pcaac420                        | -0.013561634 | 0.068663523 | 0.843722318 |
| pcaac426.pcaac363                  | -0.002551528 | 0.012920504 | 0.843745419 |
| pcaec386.asymmetricdimethylarginir | 0.006271375  | 0.031773387 | 0.843824112 |
| pcaac322.smc202                    | -0.004847231 | 0.024562676 | 0.843852936 |
| pcaac360.pcaac425                  | 0.01688165   | 0.085552739 | 0.843866084 |
| pcaec406.pcaac344                  | -0.011901979 | 0.060326957 | 0.843892058 |
| pcaec381.pcaec386                  | -0.001747342 | 0.008864107 | 0.844021434 |
| lysine.pcaac402                    | 0.013782026  | 0.069950624 | 0.844099921 |
| pcaec401.smohc141                  | -0.002556753 | 0.012977708 | 0.844110802 |
| smc261.pcaec343                    | 0.00961974   | 0.048852661 | 0.844187189 |
| pcaac320.c3                        | 0.006633778  | 0.033696209 | 0.844220908 |
| c4.pcaac420                        | 0.007879091  | 0.040055395 | 0.844350011 |
| lysopcac203.alphaaminoadipicacid   | -0.00132671  | 0.006746301 | 0.844387123 |
| smc240.pcaec361                    | -0.00206716  | 0.010513792 | 0.844420862 |
| smc202.pcaac344                    | -0.007234076 | 0.036809188 | 0.844487312 |
| serine.lysine                      | 0.014369486  | 0.073212374 | 0.844688682 |
| lysopcac182.pcaec301               | 0.006442601  | 0.032827396 | 0.844699961 |
| pcaec341.pcaac426                  | 0.009786965  | 0.049869103 | 0.844702903 |
| smohc221.tyrosine                  | 0.00941132   | 0.04796615  | 0.844738469 |
| pcaac425.pcaec402                  | -0.008619818 | 0.043941736 | 0.844771925 |
| pcaac364.tyrosine                  | 0.011024038  | 0.056290089 | 0.845022982 |
| pcaec444.pcaec446                  | -0.009067338 | 0.046321243 | 0.845096651 |
| glycine.c51                        | -0.009555202 | 0.048815569 | 0.845103021 |
| asymmetricdimethylarginine.c8      | 0.005989453  | 0.03061843  | 0.845200612 |
| smc202.alanine                     | -0.001653336 | 0.008456018 | 0.845274166 |
| pcaac384.pcaec322                  | -0.011696828 | 0.059834272 | 0.845301276 |
| pcaac403.c3                        | 0.009470895  | 0.048479741 | 0.845402301 |
| c12.pcaec420                       | 0.002645844  | 0.013547674 | 0.845448384 |
| pcaec383.lysopcac280               | 0.001739135  | 0.008905843 | 0.845462912 |
| c16.c141                           | 0.002219999  | 0.011371275 | 0.845503187 |
| pcaac360.pcaac363                  | 0.003491658  | 0.017885003 | 0.845503506 |
| c8.lysopcac281                     | -0.001807453 | 0.009259417 | 0.845524321 |
| c2.pcaac344                        | 0.011586841  | 0.059386145 | 0.845595764 |
| methioninesulfoxide.valine         | 0.004000021  | 0.020508559 | 0.84564937  |
| lysopcac140.pcaac421               | -0.005291809 | 0.027140562 | 0.845699127 |
| acetylorithoine.c101               | -0.002134115 | 0.010947447 | 0.845727295 |
| c101.pcaac405                      | 0.009673261  | 0.049621422 | 0.845727761 |
| c5.asparagine                      | 0.004268228  | 0.021901367 | 0.845772416 |
| pcaec385.pcaec421                  | -0.00016135  | 0.000828141 | 0.845811436 |
| glutamicacid.pcaac366              | -0.003724837 | 0.019121254 | 0.845837412 |
| pcaec402.c4                        | 0.003483589  | 0.017884745 | 0.845853812 |
| pcaac425.pcaac363                  | -0.002199532 | 0.011295677 | 0.845897973 |
| pcaec443.pcaec341                  | -0.003318466 | 0.017047232 | 0.845945105 |
| c162.c18                           | -0.008575435 | 0.044056182 | 0.845957092 |



|                                    |              |             |             |
|------------------------------------|--------------|-------------|-------------|
| smc261.pcaac364                    | -0.009092111 | 0.046714628 | 0.845970224 |
| pcaac402.pcaac421                  | -0.010503295 | 0.053972547 | 0.845990948 |
| methioninesulfoxide.arginine       | 0.007625168  | 0.039187652 | 0.846009319 |
| pcaac360.c3                        | 0.003938151  | 0.020241743 | 0.846028824 |
| pcaec342.pcaec424                  | 0.004479968  | 0.023031476 | 0.84606077  |
| pcaec362.pcaac426                  | 0.010747658  | 0.055278867 | 0.846130211 |
| pcaac426.asparagine                | 0.006192918  | 0.031853927 | 0.846138036 |
| pcaec401.methioninesulfoxide       | 0.002058808  | 0.010591427 | 0.846162829 |
| pcaac421.threonine                 | -0.00484569  | 0.024949123 | 0.846289099 |
| pcaec386.c51                       | -0.005106803 | 0.026299619 | 0.846324269 |
| pcaac381.pcaec301                  | -0.013823687 | 0.071232758 | 0.84641352  |
| pcaac362.pcaac403                  | -0.000552212 | 0.002845566 | 0.846415924 |
| pcaac405.pcaec445                  | -0.004457325 | 0.022972552 | 0.846441145 |
| pcaec343.pcaec362                  | -0.004181243 | 0.021571961 | 0.846597922 |
| pcaac426.pcaec445                  | 0.009794834  | 0.050533771 | 0.846598059 |
| pcaac320.pcaec362                  | -0.003689537 | 0.019039973 | 0.84663636  |
| pcaec384.c182                      | 0.003778503  | 0.019501068 | 0.846651771 |
| pcaac385.pcaac322                  | 0.007004396  | 0.036192829 | 0.846830607 |
| lysopcac280.acetylorlithoine       | 0.002610099  | 0.013488255 | 0.846846962 |
| pcaec402.pcaac364                  | 0.008989864  | 0.04647438  | 0.846903244 |
| pcaec444.taurine                   | 0.006435823  | 0.033278973 | 0.846939923 |
| pcaec386.pcaac422                  | 0.006833189  | 0.035345767 | 0.846991473 |
| leucine.pcaac385                   | -0.00658133  | 0.034076598 | 0.847140497 |
| c8.pcaac363                        | 0.001630832  | 0.008444745 | 0.847152629 |
| pcaec382.pcaac420                  | 0.019805612  | 0.102594084 | 0.847207051 |
| smc160.c16                         | -0.008511941 | 0.044106294 | 0.847254968 |
| asparticacid.pcaec420              | -0.007068945 | 0.036694633 | 0.84752426  |
| h1.asparagine                      | 0.002906119  | 0.015085928 | 0.847527953 |
| pcaec402.pcaac361                  | -0.007103108 | 0.036873617 | 0.847530963 |
| serotonin.pcaec365                 | 0.004988567  | 0.02589908  | 0.847545262 |
| pcaac402.smc180                    | 0.000480072  | 0.002493042 | 0.847584995 |
| pcaec341.c142                      | 0.006447593  | 0.033493208 | 0.84763211  |
| h1.pcaac362                        | 0.002383122  | 0.012385773 | 0.847707569 |
| pcaec383.asymmetricdimethylarginir | 0.004012554  | 0.020862744 | 0.84776768  |
| glycine.ornithine                  | -0.007748303 | 0.040290865 | 0.847784804 |
| serotonin.pcaec383                 | -0.012499657 | 0.065028683 | 0.84785639  |
| lysopcac170.pcaac360               | -0.005158124 | 0.026844149 | 0.847908637 |
| lysopcac281.pcaac403               | -0.001884972 | 0.009811901 | 0.847939895 |
| c141.pcaec363                      | -0.003582163 | 0.018649558 | 0.847965821 |
| pcaac402.c12                       | 0.015364639  | 0.08001538  | 0.848010027 |
| pcaac381.smc160                    | -0.008370586 | 0.043607685 | 0.848063952 |
| pcaec386.pcaac426                  | -0.007633601 | 0.039795412 | 0.848166335 |
| pcaac366.alphaaminoadipicacid      | -0.002070343 | 0.010793987 | 0.848178808 |
| pcaac281.c16                       | 0.007977292  | 0.041591674 | 0.848182698 |
| alanine.pcaec301                   | -0.009106505 | 0.047488548 | 0.848212458 |

|                                 |              |             |             |
|---------------------------------|--------------|-------------|-------------|
| c2.smc161                       | -0.013234262 | 0.06902767  | 0.848242266 |
| pcaec386.pcaec322               | -0.018799045 | 0.098060998 | 0.848255044 |
| pcaac362.lysopcac204            | 0.003288073  | 0.017153981 | 0.848276772 |
| pcaec322.pcaac300               | -0.011011306 | 0.057494796 | 0.848403092 |
| c51dc.smohc141                  | 0.003950876  | 0.020631281 | 0.848417942 |
| smc180.pcaec301                 | 0.010278768  | 0.053681317 | 0.848434953 |
| pcaac405.pcaac322               | -0.009556042 | 0.049925997 | 0.848492365 |
| citruiline.lysopcac161          | -0.013189916 | 0.068935678 | 0.848545194 |
| smohc241.smc161                 | 0.014267908  | 0.074571284 | 0.848548391 |
| smohc161.smc202                 | 0.015253417  | 0.079754565 | 0.848609386 |
| pcaec362.pcaec423               | -0.001975446 | 0.010329694 | 0.848621016 |
| lysine.c101                     | 0.002144141  | 0.011212115 | 0.848625125 |
| pcaec381.pcaec443               | 0.047505038  | 0.248437506 | 0.848640055 |
| pcaec341.c16                    | -0.006202498 | 0.032439761 | 0.848651598 |
| pcaac342.pcaec385               | -0.009285134 | 0.04856967  | 0.848674295 |
| pcaac322.c12                    | 0.006704615  | 0.035093024 | 0.848767202 |
| pcaac323.pcaac366               | 0.00639799   | 0.033488118 | 0.848767278 |
| c102.asymmetricdimethylarginine | 0.001683232  | 0.008810452 | 0.848769691 |
| phenylalanine.pcaec341          | -0.00702554  | 0.036782731 | 0.848807529 |
| pcaac342.pcaac323               | -0.010172897 | 0.053283226 | 0.848869983 |
| pcaec340.pcaec420               | 0.00378829   | 0.019842975 | 0.848876044 |
| smc160.smc241                   | -0.017880562 | 0.093670661 | 0.848896289 |
| lysopcac280.lysopcac182         | 0.002045776  | 0.010720602 | 0.848943933 |
| pcaac426.pcaac424               | -0.002316368 | 0.012144558 | 0.84901712  |
| smc260.glutamicacid             | -0.006384173 | 0.033473824 | 0.849026236 |
| lysopcac182.ornithine           | 0.003686692  | 0.019352611 | 0.849198534 |
| pcaec422.smohc141               | -0.003315867 | 0.017408063 | 0.849215927 |
| pcaec401.pcaec382               | -0.002571997 | 0.013506879 | 0.8492609   |
| c3.pcaac403                     | -0.001228672 | 0.006453222 | 0.849280093 |
| pcaac361.isoleucine             | -0.002951784 | 0.015512233 | 0.849365517 |
| lysopcac170.transhydroxyproline | -0.005380677 | 0.028279168 | 0.849379225 |
| pcaac320.pcaec380               | -0.009866506 | 0.051862461 | 0.849399784 |
| lysopcac140.pcaec340            | 0.011170969  | 0.05874985  | 0.849477245 |
| pcaac426.pcaec340               | 0.010824539  | 0.056938429 | 0.84950469  |
| c141oh.tyrosine                 | 0.009559035  | 0.050282638 | 0.849507401 |
| asparticacid.taurine            | -0.010364325 | 0.054531817 | 0.849543331 |
| kynurenine.c142                 | 0.010261093  | 0.053990186 | 0.849547518 |
| pcaec385.c16                    | -0.005842082 | 0.030741921 | 0.849561942 |
| lysopcac204.c4                  | 0.001372992  | 0.007226358 | 0.849592075 |
| pcaac401.lysopcac203            | -0.004674368 | 0.024602452 | 0.84959347  |
| glutamine.lysopcac280           | 0.000905809  | 0.004768836 | 0.849634679 |
| c141oh.c141                     | 0.006009334  | 0.031647914 | 0.849683517 |
| pcaec361.pcaac424               | 0.00581401   | 0.03065031  | 0.849834015 |
| pcaec420.pcaec403               | -0.002460073 | 0.012969121 | 0.849835177 |
| smohc222.asparticacid           | 0.004515937  | 0.023813984 | 0.849876741 |

|                                    |              |             |             |
|------------------------------------|--------------|-------------|-------------|
| pcaec425.pcaec446                  | 0.009781376  | 0.051593611 | 0.849914917 |
| serine.smc160                      | -0.009223285 | 0.048680554 | 0.850008413 |
| lysopcac204.arginine               | 0.008142762  | 0.042977577 | 0.850008519 |
| smohc222.c8                        | 0.005786623  | 0.030549158 | 0.850043962 |
| pcaec381.smc180                    | 0.00053959   | 0.002848818 | 0.850053168 |
| alphaaminoadipicacid.histidine     | -0.009449677 | 0.049892851 | 0.850060095 |
| pcaec381.phenylalanine             | -0.013345012 | 0.07046231  | 0.850065745 |
| methionine.smc180                  | -0.001150524 | 0.006074965 | 0.850069205 |
| pcaec404.glutamicacid              | 0.013310885  | 0.070320105 | 0.850145759 |
| asparagine.prolinr                 | 0.00734402   | 0.03880128  | 0.850159273 |
| c0.pcaec420                        | -0.009658489 | 0.051052766 | 0.850226709 |
| pcaec422.c142                      | 0.006014203  | 0.031806991 | 0.850306569 |
| kynurenine.pcaac363                | 0.001206673  | 0.006382651 | 0.850329375 |
| alphaaminoadipicacid.pcaec386      | 0.001133221  | 0.005996297 | 0.850382881 |
| pcaac385.pcaec386                  | -0.002142277 | 0.011336656 | 0.850396766 |
| glutamine.valine                   | -0.008981483 | 0.047540043 | 0.850431512 |
| pcaec384.glutamicacid              | 0.006414382  | 0.033960893 | 0.85046988  |
| pcaac366.pcaac360                  | -0.010521469 | 0.055713928 | 0.850491347 |
| asymmetricdimethylarginine.c182    | -0.006832468 | 0.036182487 | 0.850502708 |
| pcaec420.methioninesulfoxide       | 0.009166579  | 0.048565423 | 0.850570415 |
| pcaac362.pcaec365                  | -0.003572994 | 0.018930309 | 0.850572278 |
| pcaac386.c142                      | 0.00490946   | 0.026012098 | 0.850577815 |
| creatinine.smc202                  | 0.006036035  | 0.031981576 | 0.850579995 |
| alanine.pcaac421                   | 0.006345699  | 0.033622647 | 0.850581472 |
| lysopcac161.pcaec341               | 0.005011142  | 0.026558453 | 0.850620095 |
| lysopcac281.pcaec365               | 0.003813725  | 0.020220908 | 0.850683044 |
| pcaec340.h1                        | 0.000302978  | 0.001607841 | 0.850812183 |
| smc161.c3                          | -0.0028417   | 0.015082466 | 0.850833426 |
| serine.asymmetricdimethylarginine  | 0.003987108  | 0.021163734 | 0.85084704  |
| pcaec301.valine                    | -0.010725685 | 0.056965878 | 0.850933714 |
| h1.smc240                          | -0.003358602 | 0.017838889 | 0.850940325 |
| pcaec421.asymmetricdimethylarginir | -0.004244324 | 0.022545952 | 0.850957551 |
| pcaac405.pcaac364                  | 0.009859015  | 0.052371842 | 0.850958994 |
| c14.methionine                     | -0.00266885  | 0.014178377 | 0.850971921 |
| c16.pcaac240                       | -0.004249619 | 0.022579004 | 0.85098969  |
| arginine.pcaec383                  | -0.013681858 | 0.072720425 | 0.851042742 |
| prolinr.c10                        | 0.001888588  | 0.010039403 | 0.851062829 |
| pcaac360.c12                       | 0.007255105  | 0.038599988 | 0.851189132 |
| pcaac402.kynurenine                | 0.002760106  | 0.014685832 | 0.851199069 |
| smc241.pcaac406                    | 0.009861525  | 0.052489139 | 0.851250713 |
| lysopcac281.arginine               | 0.005611742  | 0.029872576 | 0.851267517 |
| arginine.lysopcac182               | -0.004864295 | 0.025900289 | 0.851304639 |
| pcaec445.pcaec384                  | 0.009673987  | 0.051559535 | 0.85144626  |
| pcaec420.valine                    | -0.005732633 | 0.030559086 | 0.851474223 |
| pcaec444.pcaac322                  | 0.008123299  | 0.043328973 | 0.851561979 |

|                                   |              |             |             |
|-----------------------------------|--------------|-------------|-------------|
| pcaec364.pcaac386                 | 0.004883274  | 0.026057939 | 0.851623784 |
| pcaac300.pcaac320                 | -0.015268737 | 0.081510746 | 0.851685494 |
| pcaac401.pcaec384                 | -0.00503267  | 0.026868479 | 0.851696575 |
| pcaac364.pcaac405                 | -0.008172789 | 0.04365291  | 0.851763496 |
| smc202.smc241                     | 0.004173532  | 0.022323055 | 0.851968092 |
| lysopcac181.asymmetricdimethylarg | 0.003438548  | 0.01839286  | 0.851976265 |
| lysopcac281.methioninesulfoxide   | 0.002328791  | 0.01246114  | 0.852027817 |
| smc240.pcaac403                   | -0.003777257 | 0.020214769 | 0.852049713 |
| pcaac420.smc161                   | 0.012225179  | 0.065431121 | 0.852062149 |
| pcaec343.valine                   | 0.007672132  | 0.041069248 | 0.852086242 |
| pcaac425.c12                      | -0.008162012 | 0.04372717  | 0.852205161 |
| c51.serotonin                     | 0.013253405  | 0.071066007 | 0.852333023 |
| lysopcac204.pcaac385              | 0.004706287  | 0.0252472   | 0.852400351 |
| pcaec402.smohc141                 | -0.003990081 | 0.021413334 | 0.852456696 |
| pcaac405.phenylalanine            | 0.004025463  | 0.021618225 | 0.852557919 |
| lysopcac181.c10                   | 0.005620576  | 0.030184894 | 0.852559506 |
| lysopcac140.pcaec383              | -0.013766821 | 0.073950728 | 0.852593027 |
| ornithine.pcaec423                | -0.000630241 | 0.003385863 | 0.852611022 |
| pcaac363.pcaec402                 | -0.0045238   | 0.024306353 | 0.852629142 |
| c14.lysopcac281                   | 0.002038519  | 0.010961656 | 0.852744801 |
| lysopcac203.lysopcac281           | 0.001793822  | 0.009646571 | 0.852755626 |
| lysopcac170.pcaec385              | 0.004801828  | 0.025827063 | 0.852780673 |
| glutamine.lysopcac281             | -0.002118647 | 0.011396252 | 0.852792388 |
| smc161.isoleucine                 | -0.003180558 | 0.017110889 | 0.85281443  |
| pcaec406.pcaec402                 | 0.011231338  | 0.060432103 | 0.852836876 |
| smc160.pcaec383                   | -0.010030376 | 0.053976545 | 0.852854176 |
| prolinr.smc202                    | 0.006888119  | 0.037068808 | 0.852860903 |
| c51.pcaec404                      | 0.004144253  | 0.022315802 | 0.852947367 |
| lysopcac204.lysopcac182           | -0.005317532 | 0.028634332 | 0.852950962 |
| pcaac321.c142                     | -0.004473398 | 0.0240943   | 0.852984352 |
| c0.pcaec365                       | -0.006084108 | 0.032783239 | 0.853043973 |
| pcaec341.pcaac360                 | -0.005384554 | 0.029014037 | 0.853045141 |
| pcaac385.c8                       | -0.006297742 | 0.033942151 | 0.853077278 |
| c141.prolinr                      | -0.004846077 | 0.026134518 | 0.853167427 |
| smc180.pcaac361                   | -0.006954546 | 0.037522085 | 0.853232254 |
| pcaec340.smohc141                 | 0.006799208  | 0.03669083  | 0.853259313 |
| pcaec443.taurine                  | 0.008801109  | 0.047525234 | 0.853355365 |
| c51dc.pcaac300                    | 0.00683762   | 0.036927662 | 0.853375388 |
| lysopcac161.c14                   | -0.00857722  | 0.046345335 | 0.853446335 |
| pcaac384.c3                       | 0.003781538  | 0.020461476 | 0.853649373 |
| pcaac321.smc241                   | 0.008439992  | 0.045668363 | 0.853650989 |
| pcaec385.taurine                  | -0.005030916 | 0.027224179 | 0.853662408 |
| putrescine.pcaac385               | -0.004811284 | 0.026035971 | 0.853664103 |
| acetylmethoine.c102               | -0.003512503 | 0.01900947  | 0.853677615 |
| pcaec360.smohc241                 | -0.012586526 | 0.068153114 | 0.853753041 |

|                                |              |             |             |
|--------------------------------|--------------|-------------|-------------|
| pcaac341.smohc241              | -0.008018302 | 0.043444886 | 0.853845033 |
| pcaec403.pcaac361              | -0.00713303  | 0.038701369 | 0.854043211 |
| pcaec361.lysopcac182           | -0.00276355  | 0.014995317 | 0.854055151 |
| pcaac425.c51                   | 0.008267032  | 0.044885097 | 0.854142936 |
| pcaac422.c12                   | 0.008997753  | 0.048946377 | 0.854419579 |
| pcaac420.putrescine            | -0.005355979 | 0.0291627   | 0.854552869 |
| pcaac281.pcaac424              | -0.002235507 | 0.012188485 | 0.854746377 |
| lysopcac161.pcaac322           | 0.012145427  | 0.06631449  | 0.854951943 |
| smohc221.pcaec385              | -0.007198013 | 0.039303333 | 0.854958925 |
| pcaac402.pcaec423              | 0.004518769  | 0.024680221 | 0.854995933 |
| pcaac422.c4                    | 0.001207615  | 0.006600065 | 0.855091916 |
| ornithine.glutamine            | 0.003966973  | 0.021688765 | 0.855143335 |
| pcaac380.tyrosine              | 0.008576392  | 0.046893948 | 0.855155405 |
| pcaec380.pcaac360              | -0.008779428 | 0.048005782 | 0.855160407 |
| pcaec386.pcaac343              | 0.004146262  | 0.0226722   | 0.85516356  |
| lysopcac203.pcaac385           | 0.004676742  | 0.02563414  | 0.855505626 |
| pcaac380.pcaac364              | 0.007402215  | 0.040574687 | 0.855511579 |
| pcaec404.serotonin             | -0.017568638 | 0.096307736 | 0.855521321 |
| pcaec361.c142                  | 0.005437432  | 0.029837881 | 0.855669621 |
| pcaac422.c3                    | 0.009912648  | 0.054398401 | 0.855676959 |
| pcaec301.c14                   | 0.006010607  | 0.032997575 | 0.85573192  |
| pcaec425.kynurenine            | -0.00190598  | 0.010466478 | 0.855770824 |
| creatinine.valine              | 0.009586607  | 0.052656047 | 0.855804053 |
| pcaec380.lysopcac180           | -0.011192909 | 0.061528274 | 0.855918409 |
| alanine.threonine              | -0.005656847 | 0.031096236 | 0.855918933 |
| pcaac341.pcaec423              | 0.000759164  | 0.004173361 | 0.855924582 |
| citruline.pcaac420             | -0.008903273 | 0.048950872 | 0.855944323 |
| smohc161.pcaec364              | 0.005104214  | 0.028066369 | 0.855959622 |
| smohc161.pcaac362              | 0.00379859   | 0.020887393 | 0.855961065 |
| pcaac422.pcaec386              | 0.002728913  | 0.015008376 | 0.85598804  |
| pcaac366.pcaec340              | -0.007423781 | 0.040844338 | 0.85604138  |
| pcaec362.taurine               | -0.011291755 | 0.062142791 | 0.856081555 |
| smohc222.asparagine            | 0.002627406  | 0.014463315 | 0.856118028 |
| c0.lysopcac160                 | 0.000780177  | 0.004295887 | 0.856157105 |
| kynurenine.methioninesulfoxide | 0.005620511  | 0.03095187  | 0.856173886 |
| pcaec300.alphaaminoadipicacid  | -0.000750464 | 0.004137448 | 0.856334737 |
| lysopcac170.c51                | -0.012878383 | 0.071001086 | 0.856335117 |
| c4.pcaac320                    | 0.017182129  | 0.094750777 | 0.856368533 |
| pcaec405.pcaac425              | -0.019193812 | 0.105901686 | 0.856445654 |
| c182.ornithine                 | 0.003309738  | 0.018264233 | 0.856467287 |
| pcaec406.smohc241              | 0.009634496  | 0.053200871 | 0.85655941  |
| pcaac366.c162                  | -0.009575859 | 0.052893549 | 0.856603577 |
| acetylorlithoine.lysopcac161   | -0.004692247 | 0.025921763 | 0.856622746 |
| smc180.serotonin               | 0.011153487  | 0.061616123 | 0.856622752 |
| c5.c181                        | 0.004461256  | 0.024649398 | 0.856644113 |

|                         |              |             |             |
|-------------------------|--------------|-------------|-------------|
| pcaec342.pcaac281       | 0.000237571  | 0.001312808 | 0.856663007 |
| pcaac281.c51            | -0.005583947 | 0.030860699 | 0.856681763 |
| pcaec423.valine         | 0.007350819  | 0.040626096 | 0.856683366 |
| c8.acetylnithoine       | -0.004144377 | 0.022907067 | 0.856696705 |
| lysopcac203.serotonin   | -0.014606301 | 0.080757902 | 0.856740605 |
| pcaac342.c2             | 0.011097015  | 0.061366538 | 0.856766922 |
| pcaac366.taurine        | 0.004316079  | 0.023876077 | 0.856815232 |
| lysine.smc161           | 0.008661293  | 0.047916822 | 0.856825579 |
| pcaec365.pcaac422       | -0.010517031 | 0.058192574 | 0.85684811  |
| pcaac361.c14            | 0.006989653  | 0.038676353 | 0.856853169 |
| pcaac360.putrescine     | 0.006443566  | 0.035664591 | 0.85689263  |
| pcaac421.c142           | 0.007001955  | 0.038787966 | 0.857012092 |
| c2.smc240               | 0.009276505  | 0.051448506 | 0.857178316 |
| c141oh.pcaac343         | -0.004319235 | 0.023964641 | 0.857235458 |
| glutamicacid.pcaec386   | 0.001761327  | 0.009778696 | 0.857325483 |
| pcaec445.pcaec364       | -0.002750033 | 0.015269713 | 0.857342374 |
| pcaec383.histidine      | -0.013201622 | 0.073314592 | 0.857365156 |
| pcaac401.pcaac422       | -0.032727634 | 0.181804902 | 0.857406679 |
| lysopcac281.pcaec341    | 0.010818499  | 0.060108295 | 0.857431498 |
| smohc141.pcaac361       | 0.008607026  | 0.047846354 | 0.857505618 |
| c8.c141oh               | -0.019870131 | 0.110507012 | 0.857568373 |
| pcaec381.alanine        | 0.002568484  | 0.014285008 | 0.857573076 |
| c2.pcaec423             | 0.003521938  | 0.019614753 | 0.857766796 |
| pcaac361.smohc241       | 0.006705062  | 0.037343914 | 0.85777195  |
| lysopcac280.lysopcac181 | -0.00381999  | 0.02127891  | 0.85779464  |
| pcaac401.pcaec421       | -0.000728697 | 0.004060965 | 0.857857839 |
| pcaac343.threonine      | 0.005152478  | 0.028721003 | 0.85789061  |
| smohc141.pcaec405       | -0.003773087 | 0.02103354  | 0.857900973 |
| pcaec343.c8             | 0.005208331  | 0.029048229 | 0.857967508 |
| pcaec384.pcaac343       | -0.004254958 | 0.023743446 | 0.858041039 |
| lysopcac280.pcaec363    | 0.003289756  | 0.018363843 | 0.858090013 |
| pcaac403.smohc222       | -0.003070495 | 0.017144064 | 0.85812412  |
| pcaec322.phenylalanine  | -0.003192907 | 0.017831548 | 0.858155577 |
| c10.lysopcac161         | 0.011567866  | 0.06460772  | 0.858164742 |
| c16.c4                  | 0.004812621  | 0.026886263 | 0.858202735 |
| c16.pcaac322            | 0.009603671  | 0.053681955 | 0.858280972 |
| pcaec361.pcaec403       | -0.008860262 | 0.049539193 | 0.858316898 |
| pcaec446.pcaac384       | 0.010000358  | 0.055937767 | 0.858377309 |
| pcaec340.phenylalanine  | 0.003060634  | 0.017131127 | 0.85846923  |
| alphaaminoadipicacid.c3 | 0.006548014  | 0.036661188 | 0.858508665 |
| pcaec362.threonine      | -0.007347882 | 0.041154813 | 0.858560715 |
| glutamicacid.pcaac362   | -0.002662665 | 0.014920029 | 0.858623453 |
| pcaec360.methionine     | 0.00634513   | 0.035578398 | 0.858717679 |
| pcaec343.pcaac364       | 0.00699118   | 0.03920816  | 0.858743474 |
| c182.lysopcac180        | 0.005553024  | 0.031173258 | 0.858880699 |

|                                    |              |             |             |
|------------------------------------|--------------|-------------|-------------|
| pcaec300.pcaec404                  | -0.00389074  | 0.021843257 | 0.858891166 |
| glutamine.smohc241                 | 0.011175477  | 0.062763248 | 0.858940708 |
| smc160.pcaec380                    | 0.004624816  | 0.0259807   | 0.858978313 |
| pcaac406.pcaac360                  | 0.005508222  | 0.03097013  | 0.859098815 |
| pcaec343.pcaec322                  | 0.013624012  | 0.076645064 | 0.859178264 |
| smc261.c8                          | 0.004722227  | 0.02656761  | 0.859186742 |
| pcaec406.pcaec423                  | -0.000781566 | 0.004397432 | 0.859195616 |
| serotonin.pcaac300                 | 0.005078761  | 0.028578488 | 0.859211087 |
| pcaac424.glycine                   | -0.002371945 | 0.013353541 | 0.859278535 |
| serotonin.smc260                   | 0.003881542  | 0.021854142 | 0.859290622 |
| pcaac342.pcaec421                  | -0.001242498 | 0.007003248 | 0.85944259  |
| histidine.creatinine               | -0.001659632 | 0.009355412 | 0.859457739 |
| asparagine.pcaac383                | -0.00111954  | 0.006314776 | 0.85954326  |
| pcaec424.c142                      | 0.00661226   | 0.037306088 | 0.859578935 |
| kynurenine.lysopcac180             | -0.005763574 | 0.032524593 | 0.859607797 |
| pcaac360.creatinine                | -0.002619366 | 0.014784332 | 0.859635168 |
| pcaec445.pcaac281                  | 0.001238336  | 0.006989485 | 0.859635498 |
| pcaac406.serotonin                 | 0.015044726  | 0.084917242 | 0.859637092 |
| pcaac320.pcaec385                  | -0.007509815 | 0.042388163 | 0.859638292 |
| pcaac300.threonine                 | 0.004177474  | 0.023599975 | 0.859760548 |
| pcaac341.pcaac383                  | 0.000842923  | 0.004762125 | 0.859765306 |
| pcaac341.smc241                    | -0.003634028 | 0.020536243 | 0.859803645 |
| pcaec424.pcaac420                  | 0.014086448  | 0.079670833 | 0.859920247 |
| pcaec301.pcaac363                  | 0.001353206  | 0.007656726 | 0.859978103 |
| pcaac406.pcaec403                  | 0.005028994  | 0.02846705  | 0.86003621  |
| pcaec341.smc260                    | -0.004071774 | 0.023053071 | 0.860062928 |
| leucine.pcaec365                   | -0.003916158 | 0.022173625 | 0.86007293  |
| pcaec445.smc240                    | 0.007746762  | 0.043878261 | 0.860121616 |
| pcaac403.c18                       | -0.00755453  | 0.04281444  | 0.860202417 |
| pcaec422.pcaec340                  | 0.008496643  | 0.048168592 | 0.860245022 |
| pcaac321.isoleucine                | -0.005553579 | 0.031484074 | 0.860245465 |
| pcaac380.pcaec362                  | 0.002174766  | 0.012330759 | 0.860264359 |
| c8.pcaec385                        | -0.004461935 | 0.025306321 | 0.860305253 |
| pcaac341.pcaac344                  | 0.010434951  | 0.059183382 | 0.860306407 |
| pcaec423.pcaac321                  | 0.002998347  | 0.017007685 | 0.860323587 |
| lysine.arginine                    | 0.004084072  | 0.023168676 | 0.860337743 |
| pcaac321.ornithine                 | -0.003081533 | 0.017493954 | 0.860437424 |
| pcaac240.lysopcac161               | 0.011307176  | 0.064197627 | 0.860451311 |
| c16.phenylalanine                  | -0.006946753 | 0.039459142 | 0.860515198 |
| pcaec403.asymmetricdimethylarginir | 0.002854613  | 0.016225837 | 0.860608647 |
| pcaac321.smc261                    | -0.007370661 | 0.041909113 | 0.860653785 |
| c141oh.pcaec423                    | -0.001493118 | 0.008491439 | 0.860680795 |
| pcaac401.alanine                   | -0.002159653 | 0.012289278 | 0.860761806 |
| methionine.pcaec365                | 0.002796516  | 0.015914085 | 0.86076881  |
| pcaac383.pcaec384                  | -0.005119318 | 0.029148809 | 0.860846309 |

|                                    |              |             |             |
|------------------------------------|--------------|-------------|-------------|
| citruline.smohc141                 | 0.001327427  | 0.00755965  | 0.86087237  |
| pcaac365.smc180                    | -0.004063706 | 0.023150174 | 0.860917072 |
| pcaac381.pcaac424                  | -0.003409087 | 0.019427385 | 0.860962831 |
| pcaac364.smohc241                  | 0.011355713  | 0.064780576 | 0.86110663  |
| pcaac426.pcaec382                  | 0.00119859   | 0.006843057 | 0.861217114 |
| asparagine.pcaec365                | 0.001852015  | 0.010576079 | 0.861248912 |
| pcaec423.spermidine                | 0.009047431  | 0.051671419 | 0.861263133 |
| histidine.lysopcac180              | 0.006252173  | 0.035710641 | 0.861276284 |
| c162.ornithine                     | -0.003638889 | 0.020797416 | 0.861362847 |
| creatinine.c5                      | -0.00241399  | 0.013820873 | 0.861602564 |
| pcaac322.pcaec365                  | -0.004011413 | 0.022969398 | 0.861619076 |
| pcaac404.pcaec361                  | -0.001607227 | 0.00920383  | 0.861631427 |
| pcaec300.pcaec384                  | 0.009841009  | 0.056374064 | 0.861678182 |
| pcaac384.pcaac320                  | 0.010942346  | 0.062711274 | 0.861739789 |
| pcaec423.c142                      | 0.006335641  | 0.03631613  | 0.861763051 |
| pcaec444.smohc241                  | -0.011864579 | 0.068016292 | 0.861779304 |
| smohc141.pcaac403                  | -0.001206492 | 0.006917785 | 0.861805153 |
| glycine.pcaec384                   | 0.002651112  | 0.015207352 | 0.861862715 |
| spermidine.asparticacid            | -0.016625707 | 0.095374696 | 0.861871398 |
| pcaac402.c3                        | 0.010038052  | 0.057593919 | 0.861894733 |
| pcaac361.pcaac424                  | 0.001022217  | 0.005872536 | 0.862069523 |
| pcaac404.pcaac320                  | -0.006500156 | 0.037375754 | 0.862189997 |
| pcaec424.pcaac361                  | 0.006169811  | 0.035487062 | 0.862231448 |
| serotonin.pcaec386                 | -0.000632605 | 0.003639735 | 0.862275096 |
| c4.pcaac343                        | 0.003038686  | 0.017486712 | 0.862301834 |
| pcaec403.smc202                    | -0.01153136  | 0.066360432 | 0.862303815 |
| pcaec423.taurine                   | -0.006503336 | 0.037442867 | 0.862367889 |
| isoleucine.acetylnithoine          | 0.005738252  | 0.0330463   | 0.862402494 |
| c142.pcaac380                      | 0.005307911  | 0.030573768 | 0.862428256 |
| pcaac426.smc181                    | -0.002285973 | 0.013167666 | 0.862432158 |
| pcaec422.pcaac342                  | -0.00243074  | 0.014007843 | 0.862493296 |
| asymmetricdimethylarginine.pcaec42 | -0.005764552 | 0.033230416 | 0.862536355 |
| prolinr.lysine                     | 0.009765254  | 0.056293825 | 0.862538546 |
| smohc161.glutamicacid              | 0.00523788   | 0.030199074 | 0.86255761  |
| c182.pcaac364                      | 0.00626243   | 0.036116356 | 0.862596135 |
| lysine.asparagine                  | -0.001942758 | 0.011214566 | 0.862722195 |
| alphaaminoadipicacid.lysopcac281   | 0.007313124  | 0.042217818 | 0.862731313 |
| glutamine.pcaac420                 | -0.007088066 | 0.040968619 | 0.86289729  |
| histidine.pcaac341                 | -0.000546675 | 0.003160715 | 0.862938647 |
| pcaac321.pcaec386                  | 0.001344875  | 0.007775949 | 0.86294349  |
| lysine.pcaec301                    | 0.008985329  | 0.051973066 | 0.862997498 |
| smc240.pcaac323                    | 0.011412226  | 0.066023814 | 0.863024323 |
| lysopcac160.h1                     | -0.000268349 | 0.001553017 | 0.863069926 |
| pcaac364.pcaac300                  | -0.010921266 | 0.063233989 | 0.863132744 |
| pcaec380.asparagine                | -0.002223796 | 0.012878183 | 0.863158322 |



|                                     |              |             |             |
|-------------------------------------|--------------|-------------|-------------|
| smc240.pcaec403                     | 0.00493203   | 0.028563803 | 0.863167917 |
| pcaac344.pcaec362                   | 0.00511163   | 0.029608044 | 0.863186627 |
| asymmetricdimethylarginine.arginine | 0.012078126  | 0.069974911 | 0.863215465 |
| pcaec300.pcaec445                   | -0.010043248 | 0.058211275 | 0.863274737 |
| pcaec405.pcaac361                   | -0.006079001 | 0.035253757 | 0.86334961  |
| c162.c12                            | 0.010497733  | 0.060901104 | 0.863398338 |
| phenylalanine.smc260                | 0.003805707  | 0.022081932 | 0.86342076  |
| ornithine.smohc241                  | -0.010273711 | 0.059644474 | 0.863495845 |
| pcaec300.pcaec401                   | 0.008924038  | 0.051813147 | 0.86350695  |
| pcaac365.smohc161                   | -0.002500849 | 0.014531035 | 0.863609736 |
| lysopcac204.pcaac320                | -0.005562224 | 0.032323836 | 0.86363006  |
| glutamicacid.ornithine              | 0.005922703  | 0.03442392  | 0.863650572 |
| pcaac425.alanine                    | -0.002132201 | 0.012396434 | 0.863690417 |
| c162.pcaac240                       | -0.001538027 | 0.008942207 | 0.8636942   |
| lysopcac182.pcaec386                | 0.001231175  | 0.007158875 | 0.863707993 |
| pcaac343.pcaac383                   | -0.000591141 | 0.003439056 | 0.863777274 |
| c8.pcaac364                         | -0.009312379 | 0.054196744 | 0.863828321 |
| ornithine.c14                       | -0.003727758 | 0.021701063 | 0.863865798 |
| smc240.pcaec385                     | -0.007312208 | 0.042574459 | 0.863886692 |
| pcaac344.lysine                     | -0.010481438 | 0.061104236 | 0.864057209 |
| pcaac323.pcaac321                   | 0.003308291  | 0.019295286 | 0.864118262 |
| pcaac402.valine                     | 0.003710715  | 0.021642659 | 0.864119974 |
| pcaac342.pcaec341                   | 0.00737853   | 0.043057997 | 0.864191512 |
| pcaec446.c8                         | -0.005263476 | 0.030715705 | 0.86419271  |
| smc161.pcaac320                     | -0.007009862 | 0.040919058 | 0.864232446 |
| c18.c14                             | 0.0041684    | 0.024359857 | 0.864383777 |
| glycine.pcaec445                    | -0.00751783  | 0.043944827 | 0.864417763 |
| c18.serine                          | -0.006596628 | 0.038571935 | 0.864459241 |
| pcaec404.valine                     | 0.004480523  | 0.026222344 | 0.864580764 |
| c5.smc202                           | 0.013436118  | 0.07868549  | 0.864666569 |
| methioninesulfoxide.pcaec422        | -0.010348858 | 0.06062669  | 0.864713037 |
| pcaac360.pcaac320                   | -0.007549112 | 0.044227906 | 0.864722007 |
| pcaac363.pcaac403                   | 0.000890488  | 0.005224812 | 0.864919948 |
| pcaec423.pcaac364                   | -0.006204757 | 0.036412019 | 0.864943745 |
| pcaac381.pcaac421                   | 0.003649411  | 0.02142789  | 0.865016599 |
| lysopcac281.pcaac344                | 0.007900453  | 0.046437011 | 0.865156772 |
| smc260.methioninesulfoxide          | 0.001341306  | 0.007886905 | 0.865207973 |
| glycine.smohc161                    | -0.001850841 | 0.010884534 | 0.865226982 |
| smc260.serotonin                    | 0.009697084  | 0.057054535 | 0.865291005 |
| leucine.smc161                      | 0.008084372  | 0.047580449 | 0.865331934 |
| lysopcac160.methioninesulfoxide     | 0.004938879  | 0.029078396 | 0.865381001 |
| pcaec361.pcaec341                   | 0.009541987  | 0.056182986 | 0.865388345 |
| lysopcac204.pcaec401                | 0.006232292  | 0.036728763 | 0.865508777 |
| pcaec385.pcaec362                   | -0.002928685 | 0.017272618 | 0.865609036 |
| lysopcac160.pcaac361                | 0.00879547   | 0.051873818 | 0.865610155 |

|                         |              |             |             |
|-------------------------|--------------|-------------|-------------|
| c3.pcaac321             | -0.003000716 | 0.017699044 | 0.865621096 |
| glycine.pcaac403        | -0.000717597 | 0.004233367 | 0.865645752 |
| isoleucine.lysopcac140  | 0.000333043  | 0.001965061 | 0.865667261 |
| lysopcac180.lysopcac281 | -0.002274107 | 0.013424172 | 0.86572883  |
| c51.threonine           | 0.003782774  | 0.02234624  | 0.865826    |
| pcaac402.lysopcac280    | 0.002252892  | 0.01332436  | 0.865982562 |
| pcaac341.smohc141       | 0.002826217  | 0.016721216 | 0.866030353 |
| pcaac240.pcaac361       | 0.003224069  | 0.019079998 | 0.866064461 |
| smohc221.pcaac240       | -0.00130889  | 0.007748573 | 0.866108575 |
| smc181.pcaac383         | -0.000471005 | 0.002789666 | 0.866172107 |
| pcaec363.c16            | 0.00763709   | 0.045237242 | 0.866184806 |
| pcaac365.smc261         | 0.005691225  | 0.033715271 | 0.866200892 |
| pcaec402.pcaac403       | 0.001517574  | 0.008991908 | 0.866225602 |
| pcaac405.taurine        | 0.003802151  | 0.022543364 | 0.866313294 |
| c4.pcaac363             | 0.000863697  | 0.005122441 | 0.866351735 |
| alanine.valine          | 0.008378692  | 0.049695411 | 0.866359219 |
| pcaec385.pcaec401       | 0.006855871  | 0.040665362 | 0.866365916 |
| pcaec381.c14            | 0.008280583  | 0.049121458 | 0.866380635 |
| isoleucine.h1           | -0.00021886  | 0.001298366 | 0.866386791 |
| smc161.pcaec386         | -0.00251872  | 0.014944795 | 0.866411043 |
| pcaec343.pcaac300       | -0.012926982 | 0.07670808  | 0.866421356 |
| pcaec443.pcaec403       | 0.010101312  | 0.059946125 | 0.86643335  |
| smohc141.c4             | -0.002520242 | 0.014960866 | 0.866473275 |
| lysopcac161.lysopcac203 | -0.004605895 | 0.027346003 | 0.866493193 |
| pcaec406.asparticacid   | -0.006849367 | 0.040697926 | 0.866597295 |
| pcaac322.lysopcac160    | -0.0023425   | 0.013928933 | 0.866693531 |
| phenylalanine.pcaec386  | -0.000901836 | 0.005362501 | 0.866693946 |
| pcaac421.pcaac364       | 0.007166712  | 0.042617203 | 0.866701656 |
| c3.pcaac343             | 0.002220026  | 0.013204307 | 0.866729806 |
| lysopcac181.ornithine   | -0.006291529 | 0.037429716 | 0.866761036 |
| pcaec405.kynurenine     | -0.00153296  | 0.009121994 | 0.866791027 |
| pcaec386.c142           | 0.006172959  | 0.03673417  | 0.866796435 |
| pcaac380.smc161         | 0.012493669  | 0.074365471 | 0.866828188 |
| pcaec406.lysopcac281    | 0.002003949  | 0.011930631 | 0.866857145 |
| smohc241.pcaac401       | -0.001216627 | 0.007255949 | 0.867087766 |
| pcaac240.lysopcac280    | -0.006011182 | 0.03587029  | 0.867159979 |
| pcaec340.lysopcac160    | 0.008297844  | 0.04952179  | 0.867176964 |
| pcaec404.c102           | -0.004101161 | 0.024482771 | 0.867214108 |
| smc241.asparticacid     | -0.004606824 | 0.027503159 | 0.86722237  |
| pcaac405.pcaec405       | -0.005833798 | 0.034828517 | 0.867223158 |
| pcaac321.smohc222       | -0.000941417 | 0.005620419 | 0.867224095 |
| smc160.c102             | 0.003301398  | 0.019730024 | 0.867358216 |
| glycine.smc161          | -0.0055252   | 0.033044946 | 0.867457207 |
| methionine.pcaec340     | 0.009444428  | 0.056496614 | 0.867484323 |
| glutamine.c10           | 0.001071904  | 0.006412504 | 0.867491854 |

|                                   |              |             |             |
|-----------------------------------|--------------|-------------|-------------|
| pcaec383.pcaac323                 | -0.010766416 | 0.064475954 | 0.867629298 |
| putrescine.asparticacid           | -0.009035399 | 0.054111003 | 0.867632813 |
| c162.serine                       | 0.006019562  | 0.0360641   | 0.867684716 |
| pcaec364.serine                   | -0.012449324 | 0.074599107 | 0.86770816  |
| lysopcac180.pcaac385              | 0.002417851  | 0.014488519 | 0.867710124 |
| serotonin.pcaac381                | 0.00451764   | 0.027085179 | 0.867778217 |
| pcaec322.pcaec420                 | 0.003458411  | 0.020738742 | 0.867804077 |
| pcaac344.pcaec446                 | -0.007776257 | 0.046634542 | 0.867813515 |
| pcaec322.asparticacid             | -0.006004735 | 0.036011179 | 0.867815442 |
| citruline.pcaac385                | 0.00104875   | 0.006291258 | 0.867852235 |
| pcaac344.pcaec421                 | 0.000434904  | 0.002610523 | 0.867933214 |
| pcaac385.pcaec380                 | -0.010131969 | 0.06082013  | 0.867939012 |
| glycine.methioninesulfoxide       | -0.003214028 | 0.019296945 | 0.867964747 |
| alanine.pcaac320                  | -0.002609386 | 0.015666866 | 0.867966203 |
| pcaac386.phenylalanine            | 0.004288239  | 0.025748277 | 0.867973875 |
| pcaac381.pcaac425                 | 0.018426494  | 0.110693838 | 0.868037559 |
| lysine.pcaac385                   | 0.003640885  | 0.021892121 | 0.868157958 |
| serine.smc181                     | 0.001803043  | 0.010855399 | 0.868325921 |
| lysopcac160.smc181                | 0.001206446  | 0.007264516 | 0.868343701 |
| pcaac321.pcaec362                 | 0.004141329  | 0.024937477 | 0.868347882 |
| lysopcac203.asymmetricdimethylarg | -0.003057491 | 0.018415485 | 0.868379473 |
| pcaac422.c101                     | 0.003041208  | 0.018324638 | 0.868430917 |
| c162.smc161                       | 0.00978188   | 0.058954851 | 0.868463303 |
| pcaec364.smc241                   | 0.014835209  | 0.089466956 | 0.868544829 |
| pcaec341.h1                       | 0.000196621  | 0.001186459 | 0.868621001 |
| pcaec424.smc180                   | 0.000732954  | 0.004423844 | 0.868650933 |
| pcaac300.pcaec425                 | -0.002238346 | 0.0135162   | 0.868712169 |
| pcaec445.pcaac320                 | 0.008409979  | 0.050812703 | 0.868787055 |
| c101.pcaec342                     | 0.007989746  | 0.04829496  | 0.868844357 |
| pcaec364.pcaec365                 | 0.00941349   | 0.056955038 | 0.86896777  |
| pcaec380.c4                       | -0.002548385 | 0.015423407 | 0.869007756 |
| lysopcac280.pcaac323              | 0.01244661   | 0.075337554 | 0.869021256 |
| pcaec380.pcaac383                 | -0.002553162 | 0.015464889 | 0.869113272 |
| creatinine.acetylornithoine       | 0.005669955  | 0.034348559 | 0.869131336 |
| smc241.lysopcac140                | 0.000144998  | 0.000878422 | 0.869134822 |
| pcaec380.serotonin                | 0.014917567  | 0.090413522 | 0.869192964 |
| pcaac281.pcaac320                 | -0.006940309 | 0.042073306 | 0.86922056  |
| pcaac341.ornithine                | -0.00223474  | 0.013550799 | 0.869253371 |
| pcaac424.valine                   | 0.005019288  | 0.03044164  | 0.86927966  |
| pcaac362.lysopcac281              | 0.001742749  | 0.010571347 | 0.86930037  |
| kynurenine.glutamine              | -0.004047582 | 0.024576295 | 0.869427166 |
| lysopcac182.pcaec425              | 0.001004333  | 0.006098358 | 0.869431401 |
| c4.pcaac364                       | -0.004470586 | 0.027148885 | 0.869447062 |
| c2.asymmetricdimethylarginine     | 0.002475194  | 0.015035323 | 0.869481601 |
| c8.pcaec423                       | -0.010792658 | 0.065588522 | 0.86953993  |

|                                    |              |             |             |
|------------------------------------|--------------|-------------|-------------|
| pcaac422.valine                    | 0.006369098  | 0.038726839 | 0.869609766 |
| pcaec405.methioninesulfoxide       | 0.002914276  | 0.017721051 | 0.869617116 |
| smc241.pcaec402                    | -0.007486113 | 0.045529946 | 0.869641482 |
| ornithine.pcaec342                 | -0.008811565 | 0.053605405 | 0.869675627 |
| isoleucine.c141oh                  | -0.01941909  | 0.118198654 | 0.869743443 |
| c102.c2                            | 0.011436816  | 0.06961532  | 0.869748214 |
| pcaac406.lysopcac204               | 0.004377819  | 0.026653397 | 0.869776458 |
| putrescine.c101                    | 0.002916908  | 0.017764125 | 0.869814012 |
| smc180.pcaac383                    | 0.000568382  | 0.003461678 | 0.869821521 |
| pcaac422.pcaac404                  | -0.000940673 | 0.005729219 | 0.869824553 |
| pcaac381.h1                        | 0.000140162  | 0.0008539   | 0.869860622 |
| smc261.serotonin                   | -0.008179372 | 0.049848505 | 0.86990637  |
| c102.lysine                        | -0.004878975 | 0.029735539 | 0.869910833 |
| pcaec401.asymmetricdimethylarginir | 0.004353074  | 0.026579428 | 0.870148793 |
| lysine.c141oh                      | 0.015207342  | 0.092878078 | 0.870181489 |
| pcaac342.pcaac344                  | -0.011661866 | 0.071227556 | 0.870187441 |
| pcaac384.pcaac364                  | 0.011348918  | 0.069341812 | 0.870235045 |
| smohc221.pcaec425                  | 0.001094647  | 0.006689638 | 0.870261014 |
| kynurenine.lysopcac281             | -0.001020005 | 0.006233977 | 0.870271223 |
| phenylalanine.pcaac300             | -0.004634577 | 0.028326995 | 0.870279369 |
| smohc222.pcaec362                  | 0.002509299  | 0.015339931 | 0.870303198 |
| pcaac343.leucine                   | 0.001127624  | 0.006893584 | 0.870306151 |
| c51dc.smohc222                     | -0.001037263 | 0.006349912 | 0.870482932 |
| smc180.pcaac381                    | 0.005041055  | 0.030888746 | 0.87060117  |
| c51dc.pcaec423                     | -0.003088037 | 0.018948304 | 0.870780895 |
| kynurenine.ornithine               | -0.004008811 | 0.024600605 | 0.870793378 |
| pcaec383.lysopcac281               | 0.00257016   | 0.015772529 | 0.870796615 |
| pcaec402.glycine                   | -0.002656238 | 0.016301312 | 0.870800856 |
| histidine.h1                       | -0.000352701 | 0.002166731 | 0.870931242 |
| pcaac383.pcaec405                  | 0.008551082  | 0.05253619  | 0.870942873 |
| alphaaminoadipicacid.c142          | -0.005084781 | 0.031266629 | 0.871052194 |
| lysopcac181.h1                     | 0.00175856   | 0.010819647 | 0.871124912 |
| c141.pcaac424                      | -0.001302689 | 0.008022834 | 0.871251581 |
| pcaec406.creatinine                | -0.004739943 | 0.029196629 | 0.871272946 |
| pcaec381.serine                    | -0.007561556 | 0.04659769  | 0.871329822 |
| c4.c16                             | 0.003579822  | 0.022069646 | 0.871382874 |
| pcaec362.glutamicacid              | -0.005253632 | 0.03239815  | 0.87142005  |
| pcaec321.lysopcac161               | 0.010612081  | 0.065532303 | 0.871594335 |
| pcaec361.pcaec301                  | 0.009588755  | 0.059232219 | 0.871635626 |
| pcaac401.pcaec341                  | 0.005121819  | 0.03164251  | 0.87165054  |
| glutamine.pcaac361                 | 0.005353434  | 0.033104355 | 0.871769426 |
| pcaec422.pcaac344                  | -0.006270553 | 0.038800843 | 0.87185211  |
| c4.acetylornithoine                | -0.009136156 | 0.056540395 | 0.871869662 |
| pcaec422.smohc241                  | -0.007523334 | 0.046576292 | 0.871916234 |
| pcaec322.c142                      | -0.006992598 | 0.043290649 | 0.871916515 |

|                                    |              |             |             |
|------------------------------------|--------------|-------------|-------------|
| c162.pcaec365                      | -0.002921018 | 0.018091454 | 0.871970208 |
| smohc222.glutamine                 | -0.001820332 | 0.011288647 | 0.872131448 |
| pcaec386.c16                       | 0.005458315  | 0.033851656 | 0.872140183 |
| pcaec422.putrescine                | -0.005828791 | 0.036158495 | 0.872172445 |
| pcaac405.c12                       | 0.008438428  | 0.052369943 | 0.872227488 |
| pcaec406.c162                      | -0.008279758 | 0.051387971 | 0.872234277 |
| pcaac361.asymmetricdimethylarginir | -0.003118685 | 0.019368461 | 0.872315835 |
| c18.c10                            | 0.004871743  | 0.030256614 | 0.872319452 |
| glycine.pcaac420                   | 0.012087517  | 0.075121608 | 0.872404468 |
| pcaac363.smc180                    | -0.001205327 | 0.007493155 | 0.872442928 |
| c4.lysopcac180                     | 0.00827277   | 0.051449106 | 0.872491566 |
| asparagine.pcaec386                | 0.0008603    | 0.005353306 | 0.872562903 |
| c102.lysopcac280                   | -0.000644571 | 0.004012562 | 0.872614897 |
| smc181.glycine                     | 0.006316283  | 0.03932013  | 0.872615621 |
| spermidine.lysine                  | 0.004713118  | 0.02937604  | 0.8727701   |
| pcaec362.c3                        | -0.003227548 | 0.020118453 | 0.872780835 |
| pcaec342.smohc161                  | 0.001117634  | 0.006967133 | 0.872790266 |
| pcaac402.pcaac403                  | 0.002000161  | 0.012473445 | 0.87283881  |
| c2.pcaac364                        | -0.00480436  | 0.030010771 | 0.873047653 |
| c5.pcaac425                        | -0.01603025  | 0.100171344 | 0.873094488 |
| pcaec404.pcaec446                  | 0.008009612  | 0.05005453  | 0.873102799 |
| pcaec386.c182                      | 0.004372098  | 0.027333782 | 0.873154335 |
| asymmetricdimethylarginine.phenyla | 0.004500103  | 0.028137648 | 0.873170409 |
| pcaac402.pcaec422                  | -0.008366459 | 0.052321758 | 0.873192202 |
| asymmetricdimethylarginine.seroton | 0.012107627  | 0.075758108 | 0.873258608 |
| smohc222.pcaac360                  | -0.006242655 | 0.039086671 | 0.873342277 |
| pcaec363.c142                      | -0.006531764 | 0.040912369 | 0.873389926 |
| pcaac361.tyrosine                  | 0.005422716  | 0.033966959 | 0.873394456 |
| asparticacid.c162                  | 0.012370294  | 0.077490645 | 0.873402957 |
| serotonin.c16                      | -0.005277948 | 0.033088919 | 0.873503563 |
| c12.threonine                      | 0.003946302  | 0.024749215 | 0.873547908 |
| pcaec443.methionine                | -0.004041864 | 0.025357725 | 0.873593382 |
| smohc222.alphaaminoadipicacid      | -0.002533976 | 0.015917951 | 0.873753769 |
| histidine.pcaac380                 | 0.008859254  | 0.055659927 | 0.873771283 |
| smc181.pcaac381                    | 0.005476891  | 0.034416507 | 0.873796407 |
| lysopcac170.c101                   | -0.001244174 | 0.007824783 | 0.873899606 |
| pcaac401.c8                        | 0.006612358  | 0.041596494 | 0.873931084 |
| serotonin.c101                     | -0.000845455 | 0.005319122 | 0.873945237 |
| c14.c10                            | 0.000667904  | 0.004203234 | 0.873979781 |
| pcaec360.lysopcac181               | -0.003976677 | 0.025035633 | 0.874028309 |
| pcaec444.pcaec445                  | 0.013392121  | 0.084339719 | 0.87406987  |
| pcaec361.c51                       | -0.008980134 | 0.056577257 | 0.87412055  |
| pcaac366.c8                        | 0.005105637  | 0.032169756 | 0.874131681 |
| alanine.methioninesulfoxide        | 0.003183622  | 0.020069722 | 0.874195477 |
| pcaec445.pcaec301                  | -0.007314329 | 0.04611431  | 0.874207362 |

|                                    |              |             |             |
|------------------------------------|--------------|-------------|-------------|
| pcaec382.c12                       | 0.01191218   | 0.075183449 | 0.874342213 |
| lysine.lysopcac281                 | 0.000965777  | 0.006099554 | 0.874425385 |
| alphaaminoadipicacid.asparticacid  | -0.00272964  | 0.017244266 | 0.8744593   |
| pcaac362.methioninesulfoxide       | 0.001681926  | 0.010629518 | 0.874507277 |
| smc240.pcaac344                    | -0.006399513 | 0.040454093 | 0.874538452 |
| smohc141.c51dc                     | -0.015178339 | 0.095972232 | 0.874568765 |
| pcaec380.c102                      | -0.005353628 | 0.03385631  | 0.874588845 |
| pcaac420.pcaec365                  | -0.003731777 | 0.023602585 | 0.874603851 |
| lysopcac161.pcaec382               | 0.001336672  | 0.008458377 | 0.874666367 |
| c12.methioninesulfoxide            | 0.002103762  | 0.013314484 | 0.874685127 |
| pcaec380.pcaac384                  | 0.006345169  | 0.040166063 | 0.874710368 |
| pcaec385.pcaec343                  | 0.013156621  | 0.083334944 | 0.874786659 |
| pcaac425.pcaac360                  | -0.004306268 | 0.027304799 | 0.874916732 |
| smohc161.glutamine                 | -0.002172969 | 0.013782649 | 0.874957028 |
| smc160.pcaec322                    | 0.013019011  | 0.082596548 | 0.874986951 |
| pcaec343.asparagine                | 0.001057895  | 0.006713358 | 0.875019288 |
| c0.pcaac360                        | -0.003335561 | 0.021167787 | 0.875021983 |
| pcaec445.pcaec425                  | 0.000480412  | 0.003049154 | 0.875038917 |
| arginine.c141oh                    | 0.012607763  | 0.08003944  | 0.875067455 |
| pcaec446.c142                      | 0.004960701  | 0.031494974 | 0.875076638 |
| pcaec403.lysopcac181               | -0.008789395 | 0.05580959  | 0.875091378 |
| pcaac420.pcaec363                  | -0.00492334  | 0.031266882 | 0.875112737 |
| pcaac424.c18                       | 0.008409997  | 0.053428631 | 0.875156487 |
| pcaec381.pcaec383                  | -0.024214951 | 0.153938114 | 0.875237531 |
| smohc241.pcaac321                  | -0.00314578  | 0.019999195 | 0.875243673 |
| pcaec322.pcaac421                  | 0.004931886  | 0.031369316 | 0.875302879 |
| lysopcac161.isoleucine             | -0.005817876 | 0.037018608 | 0.875349468 |
| c10.glutamicacid                   | -0.007443966 | 0.047365458 | 0.875349963 |
| pcaac364.putrescine                | 0.00525574   | 0.033445331 | 0.875362558 |
| pcaec385.pcaac343                  | -0.003168893 | 0.020166028 | 0.87536573  |
| asparticacid.pcaac365              | 0.00926426   | 0.058970493 | 0.875397385 |
| pcaec421.taurine                   | 0.005948957  | 0.037885812 | 0.875457632 |
| pcaac300.pcaac383                  | 0.000745173  | 0.004745883 | 0.87546452  |
| pcaec340.asymmetricdimethylarginir | 0.003301999  | 0.021038324 | 0.87551403  |
| pcaac385.pcaac343                  | -0.002852589 | 0.018180733 | 0.875553277 |
| pcaec383.taurine                   | 0.010384791  | 0.066187653 | 0.875555264 |
| pcaec421.pcaac403                  | 0.005490572  | 0.035027009 | 0.875670651 |
| pcaec380.taurine                   | 0.007885503  | 0.050317325 | 0.875699808 |
| c2.h1                              | 0.001195822  | 0.007631022 | 0.875707804 |
| smohc221.lysopcac170               | -0.001742409 | 0.011127954 | 0.875806794 |
| h1.pcaac323                        | -0.01655221  | 0.105713612 | 0.875809552 |
| pcaec342.lysopcac140               | -0.00013958  | 0.000891676 | 0.875840274 |
| pcaac401.smohc241                  | -0.008377683 | 0.053535786 | 0.875879118 |
| pcaec386.pcaec401                  | -0.006219912 | 0.039761574 | 0.875924188 |
| pcaac402.asymmetricdimethylarginir | -0.004358147 | 0.027863583 | 0.875939987 |

|                               |              |             |             |
|-------------------------------|--------------|-------------|-------------|
| pcaec301.pcaac403             | -0.000623049 | 0.003986201 | 0.87602543  |
| pcaac401.threonine            | -0.003035074 | 0.019441485 | 0.876173545 |
| pcaac425.pcaec385             | 0.007276307  | 0.046613074 | 0.876183875 |
| pcaec386.smc260               | -0.005361267 | 0.034347924 | 0.876194162 |
| pcaec343.pcaec401             | -0.007653642 | 0.049041476 | 0.876211779 |
| pcaac405.methioninesulfoxide  | 0.004650805  | 0.029805827 | 0.876233722 |
| smc260.ornithine              | 0.004385455  | 0.02810607  | 0.876237229 |
| lysopcac160.pcaec385          | 0.004260355  | 0.027320494 | 0.876309929 |
| pcaac401.pcaec445             | -0.014357646 | 0.092102929 | 0.876351585 |
| pcaac403.pcaec405             | -0.017951152 | 0.115225078 | 0.876426253 |
| pcaac344.pcaac406             | -0.005889332 | 0.037816316 | 0.876470979 |
| pcaac240.pcaec386             | 0.002583775  | 0.016606405 | 0.876585973 |
| c18.pcaec425                  | 0.001190207  | 0.007652971 | 0.8766386   |
| pcaec380.histidine            | -0.010571124 | 0.067991587 | 0.876674177 |
| c3.lysine                     | 0.013772784  | 0.088586435 | 0.87667741  |
| pcaac380.pcaec322             | 0.0160262    | 0.103133481 | 0.876740384 |
| pcaec405.pcaac240             | -0.002819003 | 0.018153158 | 0.876821324 |
| pcaec364.pcaac300             | -0.007364882 | 0.047478368 | 0.876954405 |
| lysopcac182.pcaac240          | -0.001546801 | 0.009972936 | 0.876970892 |
| pcaec340.smc202               | 0.005417333  | 0.034956865 | 0.877071534 |
| pcaac406.pcaac363             | 0.001778614  | 0.011479938 | 0.877102634 |
| leucine.c51                   | -0.003433649 | 0.022166391 | 0.877125478 |
| pcaec301.pcaec405             | -0.006585848 | 0.04252911  | 0.877163486 |
| pcaac383.c51                  | -0.004833807 | 0.031222558 | 0.877192832 |
| smc160.taurine                | 0.007366834  | 0.047589459 | 0.877207046 |
| pcaec443.pcaac361             | -0.005756838 | 0.03720345  | 0.877254541 |
| glutamine.smc180              | 0.001067521  | 0.006901098 | 0.877294523 |
| smohc141.alphaaminoadipicacid | -0.001655713 | 0.010704476 | 0.877305306 |
| pcaac380.c4                   | -0.001669835 | 0.010800241 | 0.877355592 |
| pcaac386.pcaec340             | 0.007086604  | 0.045865977 | 0.877437554 |
| glutamine.lysopcac170         | 0.001323356  | 0.008566286 | 0.877455288 |
| smohc161.smc160               | 0.017636142  | 0.11420756  | 0.877504391 |
| pcaec402.smc241               | 0.009642449  | 0.062466913 | 0.877552345 |
| pcaac403.histidine            | 0.012856603  | 0.083305202 | 0.877575617 |
| alanine.serotonin             | 0.00997235   | 0.064631996 | 0.877604738 |
| lysopcac160.smc160            | -0.008343961 | 0.054092005 | 0.877635708 |
| pcaac403.pcaec446             | 0.007852707  | 0.050941903 | 0.877718111 |
| pcaec364.pcaec421             | 0.000121726  | 0.000789738 | 0.87773046  |
| c0.smohc241                   | -0.0080378   | 0.052173776 | 0.877790532 |
| c51dc.putrescine              | 0.00600741   | 0.038997525 | 0.877800203 |
| pcaec322.pcaec386             | 0.004179836  | 0.027153836 | 0.877890125 |
| pcaac405.isoleucine           | 0.003332035  | 0.021665861 | 0.878000094 |
| pcaec424.smc240               | 0.004861697  | 0.031631355 | 0.878073499 |
| c51dc.c101                    | 0.004144946  | 0.026976163 | 0.878110098 |
| pcaac321.methionine           | -0.003604159 | 0.023480861 | 0.878234977 |

|                                 |              |             |             |
|---------------------------------|--------------|-------------|-------------|
| smohc222.pcaec425               | 0.003437481  | 0.022412093 | 0.878327324 |
| pcaec406.pcaec423               | -0.000373629 | 0.002437088 | 0.878379661 |
| pcaec443.lysine                 | 0.011392281  | 0.074348856 | 0.878444422 |
| c142.valine                     | 0.008782831  | 0.057350091 | 0.878509927 |
| pcaac404.pcaac322               | 0.009732988  | 0.063586668 | 0.878571059 |
| pcaec423.pcaac381               | 0.005273954  | 0.034474355 | 0.878637608 |
| methionine.pcaac300             | 0.006492881  | 0.042442885 | 0.878639726 |
| smc181.pcaec420                 | 0.002185017  | 0.014283736 | 0.878645161 |
| c8.c182                         | 0.004969303  | 0.032494329 | 0.878679818 |
| pcaac426.smc260                 | -0.003142299 | 0.020557708 | 0.878739402 |
| pcaec381.pcaec363               | -0.005863206 | 0.038368013 | 0.878769054 |
| spermidine.pcaac300             | -0.026698151 | 0.174818917 | 0.878844658 |
| pcaac381.c182                   | 0.0072436    | 0.04745681  | 0.878910193 |
| lysopcac281.smc180              | 0.000866268  | 0.005676829 | 0.87894051  |
| c181.acetylorlithoine           | -0.002019459 | 0.013235647 | 0.878956152 |
| creatinine.pcaac362             | 0.003925221  | 0.025744072 | 0.879039892 |
| methioninesulfoxide.pcaec322    | 0.008469203  | 0.055550763 | 0.879049387 |
| pcaac343.pcaac406               | -0.00522591  | 0.034304128 | 0.879142463 |
| c142.alphaaminoadipicacid       | 0.001448343  | 0.009515922 | 0.879251478 |
| smc160.c162                     | 0.010890572  | 0.071560618 | 0.879263603 |
| pcaec405.valine                 | 0.005955609  | 0.039137549 | 0.879275753 |
| putrescine.pcaac360             | 0.006360314  | 0.041803629 | 0.879294505 |
| pcaac300.pcaac424               | -0.001377197 | 0.009052593 | 0.87930591  |
| pcaac425.pcaec421               | -0.000259702 | 0.001707118 | 0.879309035 |
| pcaac385.c141oh                 | 0.011786518  | 0.077488609 | 0.879326741 |
| ornithine.pcaac344              | -0.00602638  | 0.039622578 | 0.879336088 |
| pcaac323.smc161                 | 0.007847049  | 0.051619422 | 0.879396875 |
| pcaec424.pcaec342               | -0.011948776 | 0.078751475 | 0.879624952 |
| pcaac342.c14                    | 0.004150685  | 0.02736438  | 0.879660845 |
| smohc141.pcaec421               | 0.00016231   | 0.001071257 | 0.879793617 |
| pcaac362.pcaec382               | -0.000661138 | 0.004363622 | 0.879795237 |
| isoleucine.pcaec386             | 0.001407958  | 0.009292981 | 0.87979815  |
| pcaec422.pcaec386               | -0.001445787 | 0.009548288 | 0.879868398 |
| c102.pcaec386                   | 0.001282607  | 0.00847082  | 0.879871325 |
| pcaec341.lysine                 | 0.007189797  | 0.047489704 | 0.879885288 |
| kynurenine.alphaaminoadipicacid | 0.000518174  | 0.003426438 | 0.880018223 |
| pcaac424.smc160                 | -0.004059431 | 0.026857743 | 0.880083158 |
| methionine.smohc241             | 0.010009392  | 0.066239338 | 0.880111634 |
| smohc241.lysopcac181            | -0.004479581 | 0.029652144 | 0.880141883 |
| pcaac321.smc160                 | 0.00814189   | 0.053903871 | 0.880162695 |
| pcaec445.pcaac385               | 0.008170276  | 0.054125715 | 0.880237199 |
| h1.glutamicacid                 | 0.005623213  | 0.037288397 | 0.880352714 |
| h1.pcaac320                     | 0.001609676  | 0.010674663 | 0.880359945 |
| pcaec342.smohc241               | -0.004465499 | 0.029614876 | 0.880366587 |
| pcaec403.smc160                 | -0.007268424 | 0.048226031 | 0.880421608 |



|                                 |              |             |             |
|---------------------------------|--------------|-------------|-------------|
| c101.pcaac323                   | 0.009077398  | 0.060241768 | 0.880447575 |
| pcaec361.lysopcac170            | -0.003437859 | 0.022820054 | 0.880472795 |
| methionine.pcaec343             | -0.010348249 | 0.068696233 | 0.880483012 |
| pcaec424.valine                 | 0.00514199   | 0.034135105 | 0.880484087 |
| pcaec405.pcaac344               | 0.007111087  | 0.047235709 | 0.880556299 |
| pcaec360.lysopcac182            | 0.001900359  | 0.012625686 | 0.880579484 |
| c0.lysopcac180                  | -0.009133548 | 0.06074864  | 0.880709746 |
| pcaec384.pcaec322               | -0.012256875 | 0.081549254 | 0.880748783 |
| serine.lysopcac281              | -0.001042082 | 0.00693384  | 0.880757462 |
| pcaac402.pcaec340               | -0.006230075 | 0.041457664 | 0.880768207 |
| pcaac366.pcaec446               | -0.008904819 | 0.059267952 | 0.880790893 |
| lysopcac180.pcaac425            | 0.011032863  | 0.073440771 | 0.880805657 |
| lysopcac280.pcaec446            | 0.010895918  | 0.072557632 | 0.880852025 |
| c51dc.ornithine                 | 0.004720017  | 0.031442175 | 0.880892782 |
| pcaec401.pcaac364               | -0.006436619 | 0.042883665 | 0.8809105   |
| pcaec362.c51dc                  | -0.016058254 | 0.106987804 | 0.880911006 |
| c142.glutamicacid               | 0.007299301  | 0.048636718 | 0.880923803 |
| pcaac361.methioninesulfoxide    | 0.003075108  | 0.020497629 | 0.880967411 |
| c162.asymmetricdimethylarginine | -0.001083107 | 0.007219706 | 0.88096874  |
| smc180.glutamicacid             | 0.003680711  | 0.024539952 | 0.880994275 |
| pcaec300.c16                    | -0.005583671 | 0.037233673 | 0.881014412 |
| lysopcac203.acetylornithoine    | -0.005729112 | 0.038265332 | 0.881205163 |
| pcaec380.pcaac363               | 0.003481369  | 0.023253252 | 0.881209361 |
| pcaec364.taurine                | 0.003197135  | 0.021358475 | 0.881229881 |
| serine.pcaec423                 | 0.000901853  | 0.006028991 | 0.881311151 |
| c3.pcaac425                     | 0.01213581   | 0.081237186 | 0.881467659 |
| pcaec360.h1                     | 0.000424836  | 0.002844507 | 0.881494511 |
| pcaac343.pcaac384               | -0.009761598 | 0.06538134  | 0.8815345   |
| pcaac401.pcaac363               | -0.003404191 | 0.022800953 | 0.881536181 |
| pcaac360.pcaec380               | -0.010380341 | 0.069541357 | 0.881561204 |
| pcaac401.creatinine             | 0.004270383  | 0.028629748 | 0.88164756  |
| glutamine.pcaec403              | 0.005150993  | 0.034535017 | 0.881652434 |
| c181.pcaac361                   | -0.005153305 | 0.03455775  | 0.88167701  |
| pcaac365.pcaac281               | -0.000526847 | 0.00353455  | 0.881728485 |
| pcaac385.smc160                 | -0.011665284 | 0.078286726 | 0.88176709  |
| pcaec444.glycine                | -0.00230254  | 0.01545367  | 0.881775649 |
| methionine.taurine              | -0.003780053 | 0.025379741 | 0.881820156 |
| smohc221.threonine              | -0.004524636 | 0.030402272 | 0.881910103 |
| pcaec382.smohc141               | -0.003457453 | 0.023232706 | 0.881915813 |
| lysine.pcaec446                 | 0.006375206  | 0.042840436 | 0.881920162 |
| smohc221.lysopcac203            | -0.00182525  | 0.012269424 | 0.881958491 |
| prolinr.pcaac343                | 0.00246825   | 0.01659278  | 0.881966123 |
| pcaec300.threonine              | -0.002921039 | 0.019637024 | 0.881968376 |
| lysopcac170.pcaac420            | 0.011418471  | 0.076775971 | 0.881989692 |
| pcaac422.smc180                 | 0.000699599  | 0.004704797 | 0.882009824 |

|                                 |              |             |             |
|---------------------------------|--------------|-------------|-------------|
| pcaec406.pcaec322               | -0.01492636  | 0.100389311 | 0.882021026 |
| methionine.pcaec404             | -0.001249981 | 0.008410659 | 0.882073051 |
| pcaec380.prolinr                | 0.004584798  | 0.03085078  | 0.882078266 |
| pcaac383.pcaac360               | -0.003392093 | 0.022830753 | 0.882106987 |
| serotonin.pcaec385              | -0.006259741 | 0.042143936 | 0.882141003 |
| pcaac401.transhydroxyproline    | -0.006458242 | 0.04349393  | 0.882177523 |
| pcaec401.pcaec361               | 0.002762942  | 0.018610325 | 0.882195778 |
| pcaec342.pcaac360               | 0.00561179   | 0.037809893 | 0.88222861  |
| pcaac424.alanine                | 0.002403112  | 0.016194287 | 0.882251173 |
| phenylalanine.pcaac426          | 0.006512511  | 0.043898453 | 0.882281536 |
| pcaec421.pcaac361               | -0.006863995 | 0.046297083 | 0.882355752 |
| methioninesulfoxide.pcaec445    | 0.013606669  | 0.091952168 | 0.88257966  |
| pcaec300.lysopcac140            | -7.84E-05    | 0.000530029 | 0.88267373  |
| lysopcac182.pcaec343            | -0.009630696 | 0.065195878 | 0.882781409 |
| pcaac322.c142                   | -0.002661459 | 0.018030747 | 0.882870174 |
| smc260.pcaec403                 | -0.001173592 | 0.007950858 | 0.882870935 |
| pcaec381.pcaac420               | -0.012576985 | 0.085221878 | 0.88289177  |
| pcaac421.methionine             | 0.00454118   | 0.030775351 | 0.882907769 |
| alanine.asparticacid            | -0.00553585  | 0.037606943 | 0.883188304 |
| pcaac420.lysopcac204            | -0.006337094 | 0.043051031 | 0.883190893 |
| pcaac240.c3                     | 0.004978447  | 0.03383096  | 0.883224803 |
| c2.pcaac343                     | 0.002423853  | 0.01647455  | 0.883247992 |
| pcaec444.asparagine             | -0.001600584 | 0.010879439 | 0.883253485 |
| alphaaminoadipicacid.pcaac320   | 0.004721813  | 0.032095413 | 0.883255169 |
| pcaec445.lysopcac140            | -0.000340968 | 0.00231896  | 0.883320588 |
| c142.c51                        | 0.004391835  | 0.029871496 | 0.883328994 |
| asparagine.pcaac385             | -0.002189111 | 0.014904741 | 0.883447803 |
| acetylmethionine.pcaec401       | -0.002339087 | 0.015926163 | 0.883449973 |
| smc160.pcaac364                 | 0.00571396   | 0.038924787 | 0.883509712 |
| lysopcac181.pcaec360            | 0.001029483  | 0.007016656 | 0.883568841 |
| prolinr.pcaec446                | 0.006192282  | 0.042205586 | 0.883570994 |
| smc241.c12                      | 0.005194655  | 0.035413573 | 0.883595948 |
| isoleucine.pcaec402             | -0.006568151 | 0.044777762 | 0.883597604 |
| pcaac341.h1                     | 0.000187098  | 0.001275671 | 0.883610981 |
| pcaac420.pcaec322               | 0.009184562  | 0.062636009 | 0.883636559 |
| c141oh.pcaac424                 | 0.000577292  | 0.003937384 | 0.883648877 |
| pcaec363.pcaec386               | -0.000967868 | 0.006601297 | 0.883649143 |
| glycine.pcaac363                | 0.001853044  | 0.012642461 | 0.883684513 |
| pcaac384.pcaac406               | 0.004207348  | 0.028711789 | 0.883712653 |
| smc261.c182                     | -0.003131509 | 0.021374158 | 0.883734852 |
| pcaac385.serotonin              | 0.014296916  | 0.097603034 | 0.88375761  |
| c18.pcaec445                    | 0.00837834   | 0.057205519 | 0.883773292 |
| alphaaminoadipicacid.creatinine | -0.002111035 | 0.014426853 | 0.88387854  |
| h1.pcaac422                     | 0.010630095  | 0.072647242 | 0.883880063 |
| asparticacid.lysine             | -0.009884743 | 0.067565852 | 0.883901266 |

|                                    |              |             |             |
|------------------------------------|--------------|-------------|-------------|
| pcaec421.c142                      | 0.004105212  | 0.02806805  | 0.883931715 |
| c141oh.h1                          | 0.000323096  | 0.002209538 | 0.883956657 |
| pcaac321.smc181                    | 0.001819648  | 0.012447658 | 0.883991014 |
| pcaac362.lysine                    | -0.00647117  | 0.044270392 | 0.883999085 |
| pcaac360.c142                      | -0.005663017 | 0.038776753 | 0.884103262 |
| c142.pcaec340                      | -0.003061363 | 0.020965705 | 0.884122081 |
| smohc221.c14                       | 0.003685178  | 0.025244888 | 0.884153969 |
| c0.smohc141                        | 0.002621679  | 0.01796028  | 0.884158908 |
| pcaac424.pcaec386                  | -0.001662066 | 0.011389792 | 0.884194353 |
| smohc221.asparagine                | 0.001347916  | 0.009254601 | 0.884413214 |
| pcaec420.pcaac362                  | 0.001701304  | 0.011684032 | 0.884443849 |
| pcaec420.pcaec386                  | 0.001610921  | 0.011065408 | 0.884465618 |
| c10.pcaec423                       | 0.009429835  | 0.064794308 | 0.884502449 |
| smohc241.lysopcac161               | -0.009817475 | 0.067486588 | 0.884551263 |
| acetylmithoine.smc160              | -0.009532548 | 0.065531796 | 0.884557973 |
| pcaec405.pcaac403                  | 0.002360549  | 0.016232139 | 0.884589523 |
| pcaac300.lysopcac140               | 0.000114952  | 0.000790897 | 0.884653456 |
| pcaac365.pcaac381                  | 0.003756389  | 0.025847301 | 0.884663913 |
| smc181.pcaac403                    | 0.000574683  | 0.003954369 | 0.884665052 |
| pcaac321.pcaec365                  | 0.004816691  | 0.03315324  | 0.884698866 |
| smc260.c3                          | -0.003601638 | 0.024814275 | 0.884810678 |
| pcaec401.pcaac240                  | 0.002092564  | 0.014420005 | 0.884833075 |
| lysopcac140.glutamicacid           | 0.004317017  | 0.029750684 | 0.884840076 |
| pcaac380.lysopcac281               | 0.001190237  | 0.008204215 | 0.884863822 |
| lysopcac160.c12                    | -0.009314887 | 0.064220654 | 0.884888482 |
| pcaec401.pcaec446                  | -0.006731901 | 0.04642216  | 0.884912297 |
| pcaac385.pcaac320                  | -0.010825824 | 0.074657011 | 0.88491809  |
| pcaac406.asymmetricdimethylarginir | -0.002090392 | 0.014423879 | 0.884982447 |
| prolinr.pcaec422                   | 0.004377191  | 0.030219942 | 0.885046566 |
| creatinine.pcaac240                | -0.001957442 | 0.013539043 | 0.885256871 |
| pcaac425.pcaec363                  | 0.003835471  | 0.026537381 | 0.885293671 |
| glutamine.creatinine               | 0.005879523  | 0.040687064 | 0.88531332  |
| c10.c182                           | -0.004515971 | 0.031259958 | 0.885345574 |
| pcaac424.pcaac344                  | 0.008185678  | 0.056720655 | 0.885463296 |
| pcaec424.smc260                    | -0.004173685 | 0.028924345 | 0.885478295 |
| arginine.lysopcac203               | 0.00120955   | 0.008384718 | 0.885509952 |
| lysopcac280.pcaec402               | 0.010263626  | 0.071162582 | 0.885532493 |
| pcaec421.pcaac320                  | -0.006518443 | 0.045247582 | 0.885663461 |
| methioninesulfoxide.pcaac360       | -0.008925727 | 0.061961622 | 0.885670688 |
| c0.smc202                          | -0.004920222 | 0.034179727 | 0.885750315 |
| pcaec381.pcaec446                  | 0.010921625  | 0.075872874 | 0.885754336 |
| c142.pcaac360                      | 0.002742442  | 0.01906791  | 0.885850019 |
| c14.lysopcac161                    | 0.00675913   | 0.046997219 | 0.885854108 |
| pcaec363.lysopcac280               | 0.001547618  | 0.010766052 | 0.885909287 |
| pcaac363.pcaac366                  | 0.004004043  | 0.027866535 | 0.885959226 |

|                                    |              |             |             |
|------------------------------------|--------------|-------------|-------------|
| pcaec362.smc161                    | -0.010200349 | 0.071004737 | 0.885982179 |
| pcaac364.pcaac424                  | -0.001190316 | 0.008287815 | 0.886009698 |
| smc240.c101                        | 0.001712212  | 0.011923515 | 0.886027669 |
| c181.c141                          | -0.004956262 | 0.034517456 | 0.886037506 |
| pcaac341.pcaac405                  | -0.005577715 | 0.038858328 | 0.886074835 |
| pcaec405.c3                        | -0.003319483 | 0.023127897 | 0.886084713 |
| asparagine.pcaac320                | -0.002418493 | 0.016855323 | 0.88611767  |
| pcaec322.pcaac380                  | -0.008311106 | 0.057941529 | 0.886153823 |
| pcaec322.pcaec402                  | 0.008093851  | 0.056452837 | 0.886205736 |
| pcaec343.pcaec403                  | 0.004166587  | 0.029066974 | 0.886228835 |
| glutamicacid.smc181                | 0.002604133  | 0.018171714 | 0.886258316 |
| c16.pcaec362                       | -0.001895574 | 0.013230151 | 0.886282096 |
| pcaec342.pcaac406                  | -0.007814997 | 0.054551642 | 0.886296371 |
| pcaec420.pcaac300                  | 0.004702459  | 0.032826125 | 0.886300413 |
| smohc141.pcaac426                  | 0.005877647  | 0.041043056 | 0.886337226 |
| lysopcac181.pcaec365               | -0.002635306 | 0.018410498 | 0.886388765 |
| pcaac321.pcaac363                  | -0.002403427 | 0.016794533 | 0.886415387 |
| pcaec406.pcaac362                  | 0.00186327   | 0.013022478 | 0.886436363 |
| pcaec406.c8                        | 0.005823232  | 0.040707425 | 0.886460193 |
| glycine.glutamine                  | 0.00273632   | 0.019131333 | 0.886478055 |
| smc161.lysopcac204                 | 0.004859995  | 0.033996272 | 0.886534426 |
| pcaac364.pcaec446                  | -0.004269835 | 0.029871276 | 0.886546667 |
| c8.lysopcac170                     | -0.002262349 | 0.015830872 | 0.886573298 |
| pcaac381.pcaac384                  | -0.005907862 | 0.041340921 | 0.886574451 |
| pcaec362.c142                      | 0.006460182  | 0.045246387 | 0.886675406 |
| pcaac383.smohc241                  | -0.006597674 | 0.046221566 | 0.886705107 |
| pcaec444.pcaac323                  | -0.009689132 | 0.067879946 | 0.886705835 |
| pcaac322.pcaac424                  | 0.001472964  | 0.010320569 | 0.886720098 |
| pcaec444.pcaac405                  | -0.007614188 | 0.053361964 | 0.886745117 |
| c102.c101                          | 0.00298864   | 0.020948542 | 0.886763755 |
| pcaec301.pcaec423                  | -0.000622269 | 0.004365032 | 0.886848907 |
| pcaac401.valine                    | 0.003394154  | 0.023823281 | 0.886916393 |
| pcaac362.smohc161                  | -0.003097288 | 0.021747019 | 0.886954694 |
| c14.asparticacid                   | 0.004138998  | 0.029083579 | 0.887041142 |
| c51dc.c10                          | 0.000819468  | 0.005759806 | 0.887072936 |
| lysopcac140.pcaac341               | 0.000670419  | 0.004713071 | 0.887094078 |
| pcaac281.asymmetricdimethylarginir | -0.002300049 | 0.016181423 | 0.887177219 |
| pcaac420.pcaac364                  | 0.004684055  | 0.032974617 | 0.887248939 |
| pcaac404.pcaec362                  | 0.001914102  | 0.013474869 | 0.887249385 |
| pcaec423.pcaac363                  | -0.003569732 | 0.025137908 | 0.887283926 |
| c5.pcaac360                        | 0.005085907  | 0.035823464 | 0.887311178 |
| c10.putrescine                     | 0.004175052  | 0.02941247  | 0.887329321 |
| smc240.ornithine                   | 0.00376632   | 0.026533181 | 0.887329958 |
| pcaac383.pcaac363                  | -0.001987089 | 0.014003002 | 0.88736393  |
| c12.c142                           | -0.006125268 | 0.043173405 | 0.887386404 |

|                          |              |             |             |
|--------------------------|--------------|-------------|-------------|
| methionine.pcaac320      | -0.002223717 | 0.015677578 | 0.887414292 |
| c51dc.pcaac383           | 0.001585509  | 0.011178994 | 0.887423162 |
| pcaac422.pcaec361        | 0.001797104  | 0.012677904 | 0.887485045 |
| pcaec321.lysopcac182     | 0.002717354  | 0.019187037 | 0.887584683 |
| pcaac380.pcaec423        | -0.000436725 | 0.003085421 | 0.88764756  |
| pcaec341.pcaac240        | -0.001975391 | 0.013959522 | 0.887676099 |
| pcaec383.c142            | 0.004035666  | 0.028519442 | 0.887678274 |
| c18.pcaec300             | 0.005555897  | 0.039264322 | 0.887682914 |
| pcaec401.pcaec341        | -0.003280424 | 0.023195779 | 0.887743273 |
| pcaac421.c101            | 0.006728179  | 0.047612074 | 0.887830685 |
| citruline.pcaec343       | 0.009486256  | 0.067136039 | 0.887841289 |
| pcaec384.pcaec340        | 0.009252428  | 0.065487357 | 0.887851771 |
| c162.smohc241            | -0.005899091 | 0.041762809 | 0.887878153 |
| pcaec321.taurine         | 0.003150862  | 0.022310699 | 0.887898475 |
| glycine.pcaec364         | -0.003363142 | 0.023828659 | 0.887967826 |
| lysopcac203.pcaec365     | 0.002392008  | 0.016956176 | 0.888021855 |
| pcaac362.smohc241        | -0.008044526 | 0.057064791 | 0.888099301 |
| c4.pcaec365              | -0.004673815 | 0.033159526 | 0.888116967 |
| acetylorithoine.pcaec420 | -0.0034558   | 0.024518076 | 0.888117195 |
| c141oh.smohc161          | 0.00090565   | 0.006427982 | 0.888162329 |
| glutamine.lysopcac182    | 0.00412793   | 0.029304913 | 0.888186362 |
| arginine.h1              | -0.000257084 | 0.001826553 | 0.888275437 |
| pcaac385.isoleucine      | 0.003801766  | 0.027012637 | 0.888281857 |
| smc260.c162              | -0.010183827 | 0.072406436 | 0.888354539 |
| c4.smohc141              | -0.001902767 | 0.013529023 | 0.88835831  |
| smc202.valine            | -0.00821851  | 0.058440757 | 0.888368988 |
| smc261.pcaac424          | -0.001495953 | 0.010638162 | 0.88837558  |
| pcaac360.pcaec422        | -0.002530188 | 0.01799772  | 0.888405214 |
| pcaec402.c14             | 0.00795365   | 0.056584605 | 0.88842236  |
| pcaec424.lysopcac203     | 0.001660078  | 0.011817868 | 0.888493506 |
| smc261.pcaec341          | 0.010502536  | 0.074811482 | 0.888560676 |
| pcaec381.methionine      | -0.002217995 | 0.015807659 | 0.88862005  |
| prolinr.c141             | 0.006188144  | 0.044112008 | 0.888642816 |
| pcaac404.phenylalanine   | 0.003726255  | 0.026570248 | 0.888675052 |
| isoleucine.pcaec341      | 0.003663767  | 0.026143948 | 0.888756589 |
| creatinine.pcaec343      | -0.008633814 | 0.061656167 | 0.888840663 |
| lysopcac203.pcaac401     | -0.000554063 | 0.00395671  | 0.888841045 |
| ornithine.pcaec343       | -0.009381221 | 0.067021903 | 0.888887326 |
| pcaac422.histidine       | -0.009777589 | 0.069912924 | 0.88898089  |
| lysopcac182.pcaec385     | 0.004400507  | 0.031497459 | 0.889094386 |
| pcaec420.smohc221        | 0.013132424  | 0.094021925 | 0.889122646 |
| pcaac344.smohc241        | -0.005770456 | 0.041333082 | 0.889174223 |
| pcaec362.pcaec446        | 0.004192511  | 0.030050388 | 0.889247265 |
| smohc222.lysopcac161     | 0.008670111  | 0.062151562 | 0.889260331 |
| phenylalanine.h1         | 0.000613754  | 0.00440056  | 0.889282241 |

|                                    |              |             |             |
|------------------------------------|--------------|-------------|-------------|
| c142.smc160                        | 0.007122467  | 0.051082348 | 0.889314271 |
| pcaec401.pcaec404                  | 0.002695143  | 0.019332078 | 0.88932854  |
| pcaac323.c2                        | -0.006547083 | 0.046977443 | 0.889365188 |
| pcaac364.pcaec382                  | 0.001357237  | 0.009745359 | 0.889441244 |
| putrescine.acetylnithoine          | 0.003284574  | 0.023596158 | 0.88949691  |
| pcaac380.lysopcac182               | -0.001458142 | 0.010485391 | 0.889603638 |
| pcaec321.glutamicacid              | 0.006051417  | 0.043533024 | 0.889648357 |
| leucine.pcaec406                   | -0.002009197 | 0.014454367 | 0.889652086 |
| pcaac386.smc202                    | 0.003289915  | 0.023678615 | 0.889701333 |
| lysopcac180.methioninesulfoxide    | 0.005509486  | 0.039655169 | 0.889705628 |
| putrescine.pcaec423                | -0.00054846  | 0.003948279 | 0.889724242 |
| pcaec402.pcaec386                  | 0.001839183  | 0.013253071 | 0.889832454 |
| pcaec401.lysopcac182               | -0.006514369 | 0.046964152 | 0.88988348  |
| pcaac321.methioninesulfoxide       | -0.006417694 | 0.0462778   | 0.88990856  |
| pcaac403.smc180                    | 0.000369137  | 0.002662831 | 0.889949586 |
| pcaec382.pcaac342                  | -0.003133602 | 0.022622077 | 0.890033141 |
| histidine.pcaec386                 | 0.000909701  | 0.006570029 | 0.89007846  |
| smohc161.lysine                    | 0.006627466  | 0.047865777 | 0.890080678 |
| pcaac381.pcaec423                  | -0.000614115 | 0.004435621 | 0.89008748  |
| pcaac424.threonine                 | -0.003119802 | 0.022554397 | 0.890187915 |
| alanine.smc180                     | -0.005411177 | 0.039127079 | 0.890208379 |
| acetylnithoine.pcaec363            | -0.002312025 | 0.016719636 | 0.890220601 |
| pcaec444.smc240                    | 0.003248132  | 0.023508944 | 0.890312244 |
| pcaac320.lysopcac203               | 0.001467986  | 0.010625486 | 0.890319171 |
| c141oh.pcaac420                    | 0.014185701  | 0.102750522 | 0.890395992 |
| smc261.prolinr                     | -0.004156068 | 0.030113672 | 0.890433065 |
| c181.creatinine                    | 0.001170861  | 0.008486313 | 0.89046629  |
| smohc221.c101                      | -0.000955611 | 0.006926402 | 0.890469539 |
| pcaec360.pcaac320                  | -0.005803105 | 0.042083597 | 0.890526106 |
| pcaec342.pcaac300                  | -0.010438906 | 0.075735105 | 0.890573641 |
| asymmetricdimethylarginine.pcaac38 | -0.005069152 | 0.036797516 | 0.89063394  |
| ornithine.lysopcac170              | -0.002962711 | 0.021510414 | 0.890653016 |
| c182.pcaec446                      | -0.007687265 | 0.055827145 | 0.890681567 |
| pcaec423.methioninesulfoxide       | 0.00138843   | 0.010089446 | 0.89074902  |
| pcaec361.threonine                 | -0.003302331 | 0.023998082 | 0.890752187 |
| pcaec361.smohc141                  | -0.00333234  | 0.02421834  | 0.890761953 |
| pcaec321.c162                      | 0.007814247  | 0.056798059 | 0.890774779 |
| pcaec423.c8                        | 0.004970619  | 0.036135477 | 0.890794    |
| acetylnithoine.pcaec424            | -0.002299216 | 0.016721001 | 0.89083376  |
| lysopcac160.lysopcac281            | 0.001281593  | 0.009322374 | 0.890857182 |
| lysopcac140.c12                    | -0.008571909 | 0.062367259 | 0.890882869 |
| pcaac344.pcaec386                  | 0.001887358  | 0.013739454 | 0.890941793 |
| pcaac402.pcaac420                  | 0.017117488  | 0.124645589 | 0.890972158 |
| serine.smohc141                    | 0.008267234  | 0.060232972 | 0.891031301 |
| smohc241.pcaec380                  | 0.004881506  | 0.035573885 | 0.891057076 |

|                                    |              |             |             |
|------------------------------------|--------------|-------------|-------------|
| lysopcac161.pcaec420               | 0.005767505  | 0.042032685 | 0.891062491 |
| pcaec404.c18                       | 0.005254948  | 0.038299416 | 0.891068611 |
| pcaec402.c141                      | 0.00705965   | 0.051508661 | 0.891186529 |
| pcaec445.smc260                    | -0.005983519 | 0.043685491 | 0.891257084 |
| c182.asymmetricdimethylarginine    | 0.00147517   | 0.010771309 | 0.891268507 |
| pcaec300.asymmetricdimethylarginir | -0.002938894 | 0.021467759 | 0.891312374 |
| pcaec343.pcaec380                  | 0.003184638  | 0.023273312 | 0.89136094  |
| methionine.pcaec424                | 0.001022685  | 0.007474834 | 0.891376253 |
| pcaec424.pcaec424                  | 0.002251818  | 0.016478884 | 0.891509106 |
| pcaec383.smc260                    | -0.002868147 | 0.020989545 | 0.891510859 |
| pcaec406.h1                        | -0.000350339 | 0.002564148 | 0.891523974 |
| lysine.pcaec343                    | -0.009507209 | 0.069593662 | 0.8915394   |
| pcaec403.pcaec342                  | -0.004235392 | 0.03101503  | 0.891579591 |
| smohc141.pcaec343                  | -0.00309245  | 0.022649761 | 0.891600025 |
| pcaec365.isoleucine                | -0.002396396 | 0.017555196 | 0.891621364 |
| pcaec382.glycine                   | -0.002241995 | 0.016427092 | 0.891640955 |
| smc260.pcaec424                    | 0.001092369  | 0.008004427 | 0.89164961  |
| lysopcac140.pcaec381               | -0.005815107 | 0.04263653  | 0.891714857 |
| pcaec362.pcaec366                  | -0.009595404 | 0.070362756 | 0.89172858  |
| lysopcac140.pcaec343               | 0.003124485  | 0.02291249  | 0.891732131 |
| pcaec406.glutamicacid              | 0.005512628  | 0.040452366 | 0.891804278 |
| pcaec321.c10                       | 0.000873631  | 0.006411166 | 0.891810115 |
| pcaec403.putrescine                | 0.006765138  | 0.049655438 | 0.891830259 |
| putrescine.lysopcac170             | 0.001642939  | 0.012062493 | 0.891861316 |
| smc260.c182                        | 0.004557642  | 0.03346915  | 0.891883289 |
| lysopcac181.c12                    | -0.006956659 | 0.051104113 | 0.891920555 |
| ornithine.c3                       | -0.003575328 | 0.026269419 | 0.891940218 |
| smc161.alanine                     | -0.002373203 | 0.017438198 | 0.891948166 |
| citruiline.methioninesulfoxide     | -0.001400445 | 0.01029504  | 0.891996465 |
| lysopcac280.smc202                 | 0.004271935  | 0.031408774 | 0.89201233  |
| h1.c101                            | -0.003483022 | 0.025616301 | 0.89204541  |
| pcaec446.pcaec301                  | 0.007308941  | 0.053785812 | 0.892107907 |
| pcaec323.pcaec341                  | -0.000542356 | 0.003993475 | 0.892170352 |
| c51dc.lysopcac161                  | 0.007646388  | 0.056374875 | 0.892309181 |
| lysopcac281.pcaec320               | -0.006742381 | 0.0497129   | 0.892315729 |
| pcaec404.glycine                   | -0.00243469  | 0.017966759 | 0.892406937 |
| c101.pcaec360                      | 0.002655397  | 0.019605802 | 0.892463321 |
| smc181.pcaec426                    | 0.005514118  | 0.040718317 | 0.892477739 |
| smc160.pcaec421                    | 0.000281393  | 0.002080716 | 0.892621619 |
| pcaec422.c51dc                     | 0.013729101  | 0.101583274 | 0.892690702 |
| pcaec281.isoleucine                | 0.002998028  | 0.022184234 | 0.892697742 |
| pcaec444.pcaec405                  | 0.00574383   | 0.04252191  | 0.892747429 |
| pcaec341.pcaec362                  | -0.007589083 | 0.05618598  | 0.892754176 |
| pcaec361.pcaec386                  | -0.00076694  | 0.005679418 | 0.892779665 |
| pcaec321.c182                      | -0.005853096 | 0.043367168 | 0.892836798 |

|                                    |              |             |             |
|------------------------------------|--------------|-------------|-------------|
| lysopcac170.smc202                 | -0.004855937 | 0.035981403 | 0.892844065 |
| pcaec381.pcaac360                  | -0.008118814 | 0.060217938 | 0.89294903  |
| arginine.lysine                    | 0.01160046   | 0.086100984 | 0.893022409 |
| pcaec340.pcaac364                  | -0.005564802 | 0.041365721 | 0.893183374 |
| pcaec443.asymmetricdimethylarginir | 0.003375923  | 0.025101752 | 0.893212866 |
| pcaec382.c182                      | 0.0054761    | 0.04072229  | 0.893224921 |
| pcaac300.alphaaminoadipicacid      | -0.000869786 | 0.006469901 | 0.893255315 |
| kynurenine.c10                     | 0.003746097  | 0.027866674 | 0.893260429 |
| pcaec364.pcaac383                  | 0.000518293  | 0.003856373 | 0.893284341 |
| pcaec381.lysopcac281               | 0.001819853  | 0.013570593 | 0.893518158 |
| pcaec384.pcaec401                  | 0.005452077  | 0.040687185 | 0.893599331 |
| pcaec343.c51                       | -0.006501232 | 0.048520667 | 0.893607966 |
| c3.c14                             | -0.001826528 | 0.013635864 | 0.893638466 |
| c2.pcaec406                        | -0.00299005  | 0.022331369 | 0.893682409 |
| pcaac360.glutamicacid              | 0.007125815  | 0.053237435 | 0.89371785  |
| lysopcac281.pcaac406               | 0.004151605  | 0.031032245 | 0.893770031 |
| pcaec425.smohc241                  | -0.006220269 | 0.046509713 | 0.89380342  |
| pcaec362.pcaec385                  | -0.007039703 | 0.052644089 | 0.893818189 |
| c10.pcaec425                       | -0.003551774 | 0.026575955 | 0.893878507 |
| pcaec322.taurine                   | 0.003761686  | 0.028162253 | 0.893937111 |
| prolinr.pcaec361                   | 0.001505353  | 0.011281627 | 0.894045932 |
| pcaec301.leucine                   | 0.001544736  | 0.011579621 | 0.894071814 |
| histidine.smohc141                 | 0.004316206  | 0.032355209 | 0.894072291 |
| pcaec364.pcaac364                  | 0.007123758  | 0.053439259 | 0.894147229 |
| pcaac240.pcaac383                  | 0.000738614  | 0.005542737 | 0.894184915 |
| acetylmithoine.pcaac363            | 0.0010636    | 0.007982899 | 0.894203241 |
| pcaac401.serotonin                 | -0.012830188 | 0.096358197 | 0.894269358 |
| c18.pcaac421                       | -0.006560765 | 0.049349342 | 0.894431676 |
| lysopcac180.pcaec444               | 0.012263549  | 0.092325696 | 0.894523358 |
| c5.pcaac362                        | -0.003771598 | 0.028418606 | 0.894612876 |
| pcaac360.asymmetricdimethylarginir | 0.005262278  | 0.039653646 | 0.894620581 |
| pcaec401.pcaec423                  | -0.004160635 | 0.031356503 | 0.894634733 |
| asparagine.c142                    | 0.003615355  | 0.027249938 | 0.89464597  |
| pcaec340.pcaec423                  | 0.000677769  | 0.005108944 | 0.894654403 |
| c181.ornithine                     | -0.003020883 | 0.022786744 | 0.894726444 |
| pcaac322.c141oh                    | 0.008717616  | 0.065765657 | 0.894739222 |
| pcaec381.c182                      | 0.005575736  | 0.042085056 | 0.894793239 |
| pcaec343.pcaac281                  | 0.000169782  | 0.001282183 | 0.894849146 |
| pcaec424.pcaec341                  | 0.003064808  | 0.023145497 | 0.894850432 |
| lysopcac180.pcaac361               | -0.007597087 | 0.057400918 | 0.894900614 |
| pcaec421.smohc241                  | -0.006384889 | 0.048243232 | 0.894903336 |
| c142.smc240                        | -0.004303419 | 0.032524005 | 0.894929139 |
| pcaec403.pcaac420                  | -0.010015478 | 0.075824839 | 0.895109244 |
| c101.c162                          | -0.010265328 | 0.077748662 | 0.895152526 |
| methioninesulfoxide.c51dc          | -0.018761283 | 0.142097904 | 0.895153735 |



|                              |              |             |             |
|------------------------------|--------------|-------------|-------------|
| kynurenine.putrescine        | -0.003016088 | 0.022853859 | 0.895199417 |
| pcaec343.smc180              | -0.001213715 | 0.009198801 | 0.895223169 |
| glutamicacid.c10             | -0.005843952 | 0.044316455 | 0.895281638 |
| pcaec405.pcaec446            | 0.006587488  | 0.049960933 | 0.895294181 |
| pcaac421.pcaec363            | 0.002960652  | 0.022458379 | 0.895313433 |
| smc240.c142                  | -0.005805013 | 0.044050021 | 0.895349822 |
| c3.pcaec423                  | 0.001901636  | 0.014430642 | 0.895353531 |
| pcaac420.pcaec341            | 0.00320483   | 0.024324699 | 0.895373684 |
| smc260.pcaec340              | 0.006897374  | 0.052367674 | 0.895406493 |
| pcaac406.pcaac320            | -0.004725905 | 0.035912615 | 0.895498044 |
| serotonin.smohc241           | -0.003677442 | 0.02799777  | 0.895692958 |
| smc161.transhydroxyproline   | 0.00380359   | 0.028958753 | 0.895695011 |
| pcaec421.glutamicacid        | -0.010593943 | 0.080664215 | 0.895703878 |
| pcaac385.taurine             | 0.002137852  | 0.0162788   | 0.895708979 |
| alanine.pcaec384             | 0.002830544  | 0.021553893 | 0.895711637 |
| pcaec406.pcaec362            | -0.002346425 | 0.0178937   | 0.89586379  |
| glutamine.asparagine         | -0.001694273 | 0.012922427 | 0.895879807 |
| lysopcac140.smc181           | 0.003683412  | 0.028112123 | 0.895947144 |
| leucine.pcaac364             | -0.003488545 | 0.026624968 | 0.8959475   |
| putrescine.methionine        | 0.003454574  | 0.026369431 | 0.895962136 |
| pcaac341.pcaec420            | -0.003921819 | 0.029957576 | 0.896036619 |
| c51dc.asparticacid           | -0.001948873 | 0.014904    | 0.896155582 |
| pcaec421.pcaec445            | -0.012409467 | 0.094905235 | 0.896159819 |
| pcaec401.pcaac384            | 0.003869235  | 0.02959882  | 0.896186513 |
| pcaec386.pcaac366            | -0.004483485 | 0.034353721 | 0.896354818 |
| lysopcac160.c102             | 0.004146569  | 0.031785359 | 0.896397559 |
| pcaec384.pcaec420            | 0.002359809  | 0.018129452 | 0.896627296 |
| pcaac426.prolinr             | 0.004759294  | 0.036595885 | 0.896717636 |
| smohc161.pcaac281            | 0.000312239  | 0.002401023 | 0.896722107 |
| pcaec403.pcaec421            | -0.000931592 | 0.007165012 | 0.89674158  |
| pcaec342.ornithine           | -0.004446241 | 0.034217835 | 0.896805044 |
| c4.pcaac360                  | -0.003532324 | 0.027192693 | 0.896836262 |
| c8.pcaec386                  | -0.000648756 | 0.004994564 | 0.896842066 |
| methioninesulfoxide.pcaac403 | -0.001861509 | 0.014338791 | 0.896896656 |
| lysopcac140.pcaec421         | -0.0006581   | 0.005072624 | 0.896965894 |
| pcaec422.smc161              | 0.012918467  | 0.099587962 | 0.896978884 |
| methioninesulfoxide.c8       | -0.009262785 | 0.071420996 | 0.89699975  |
| pcaec300.smc260              | 0.002815642  | 0.021717132 | 0.897032945 |
| pcaec382.pcaac406            | 0.010344125  | 0.079803052 | 0.897056666 |
| lysopcac280.alanine          | -0.001808235 | 0.013956584 | 0.897103436 |
| pcaec380.pcaec403            | -0.004939936 | 0.038164119 | 0.897199907 |
| lysopcac281.pcaac360         | 0.005093846  | 0.03943339  | 0.89740786  |
| lysopcac203.pcaec406         | -0.002355662 | 0.018236513 | 0.897410344 |
| h1.prolinr                   | 0.004414246  | 0.034182677 | 0.897438699 |
| c18.threonine                | 0.003657569  | 0.028341244 | 0.897503695 |

|                                 |              |             |             |
|---------------------------------|--------------|-------------|-------------|
| pcaec385.smc202                 | 0.007877979  | 0.061060412 | 0.897531501 |
| c14.c4                          | -0.002418797 | 0.018747592 | 0.897531754 |
| c5.pcaec405                     | 0.007713763  | 0.059812047 | 0.897573127 |
| c182.h1                         | 0.00014694   | 0.001139955 | 0.89762602  |
| pcaac300.pcaec363               | -0.003284488 | 0.025498767 | 0.897697147 |
| pcaec425.pcaec382               | 0.002303758  | 0.017896043 | 0.897760084 |
| pcaec423.pcaac426               | -0.009238273 | 0.071766171 | 0.897762133 |
| smc161.c162                     | -0.009366332 | 0.072820823 | 0.897845682 |
| pcaac424.taurine                | 0.007099905  | 0.055206928 | 0.89785855  |
| glutamicacid.serotonin          | 0.013184061  | 0.102551169 | 0.89789372  |
| pcaac406.transhydroxyproline    | 0.003238214  | 0.025193466 | 0.897914999 |
| ornithine.pcaac364              | 0.004548894  | 0.035400304 | 0.897942745 |
| pcaec385.pcaac383               | -0.000546059 | 0.004250442 | 0.89796464  |
| spermidine.lysopcac281          | -0.005567256 | 0.043355881 | 0.898014146 |
| pcaec360.smc260                 | -0.002676789 | 0.020849826 | 0.898033179 |
| histidine.pcaac385              | 0.001197087  | 0.009325204 | 0.898043517 |
| pcaac406.pcaac404               | 0.001224222  | 0.009540722 | 0.898087518 |
| glycine.pcaec425                | -0.00057549  | 0.004486269 | 0.898117077 |
| pcaec343.histidine              | 0.006316968  | 0.04927582  | 0.898181784 |
| pcaac426.pcaec403               | 0.002752438  | 0.021475991 | 0.898207546 |
| smc261.c18                      | 0.003192263  | 0.024928368 | 0.898291294 |
| glycine.pcaac300                | -0.004532503 | 0.035403511 | 0.898317625 |
| lysopcac204.pcaec403            | 0.004571768  | 0.035713003 | 0.898325544 |
| pcaec423.pcaec446               | -0.004353723 | 0.034039863 | 0.898415098 |
| pcaac406.pcaec405               | -0.006458426 | 0.050507013 | 0.898437889 |
| pcaac384.pcaac420               | -0.006410839 | 0.050172229 | 0.898513094 |
| pcaac360.pcaec423               | -0.000445474 | 0.003487018 | 0.898532547 |
| pcaac342.pcaac405               | -0.004580951 | 0.03588523  | 0.898608709 |
| pcaec404.pcaac365               | 0.005862489  | 0.045928837 | 0.898618769 |
| pcaec445.pcaac383               | 0.000785818  | 0.006165003 | 0.898759737 |
| lysopcac140.pcaac422            | -0.00817062  | 0.064109385 | 0.898772624 |
| c8.asparticacid                 | 0.002810219  | 0.022066766 | 0.898849523 |
| c181.c182                       | -0.007153031 | 0.056170176 | 0.898853507 |
| pcaac344.c8                     | -0.003551367 | 0.027901471 | 0.898903489 |
| c141oh.pcaac361                 | -0.005180871 | 0.040708114 | 0.898914294 |
| pcaac281.pcaec422               | 0.002974085  | 0.023394013 | 0.899023782 |
| c12.pcaac363                    | 0.001124767  | 0.008849988 | 0.899053524 |
| pcaec361.c2                     | -0.008034392 | 0.063232383 | 0.899078145 |
| pcaac420.c182                   | 0.00369115   | 0.029056605 | 0.899100488 |
| pcaac426.c141oh                 | 0.011399871  | 0.089795982 | 0.899163727 |
| pcaec342.isoleucine             | 0.0026724    | 0.021054203 | 0.899182283 |
| serotonin.pcaac424              | -0.003301837 | 0.026024794 | 0.899227135 |
| pcaec384.pcaec421               | 0.000103297  | 0.00081496  | 0.899323656 |
| alphaaminoadipicacid.methionine | 0.003412463  | 0.026927709 | 0.899342425 |
| pcaec321.pcaac383               | 0.000482328  | 0.003807532 | 0.899381615 |

|                               |              |             |             |
|-------------------------------|--------------|-------------|-------------|
| pcaac403.pcaec341             | -0.004124453 | 0.032561091 | 0.899388782 |
| asparagine.lysopcac203        | -0.00579247  | 0.045768197 | 0.899473401 |
| pcaac426.pcaec362             | 0.001428128  | 0.011287457 | 0.899503119 |
| pcaec363.pcaac360             | 0.004404219  | 0.034839169 | 0.899588198 |
| lysopcac140.pcaac363          | -0.001411556 | 0.011166452 | 0.899592347 |
| citruiline.smc240             | 0.003803458  | 0.030136807 | 0.899753579 |
| pcaac405.smc160               | -0.009597402 | 0.076054159 | 0.899765206 |
| smohc161.smohc241             | 0.015926142  | 0.126221579 | 0.899777542 |
| alphaaminoadipicacid.pcaac385 | -0.003344385 | 0.02651325  | 0.899805922 |
| pcaac406.pcaec406             | 0.006738486  | 0.053451758 | 0.899863952 |
| c182.acetylornithoine         | -0.001760543 | 0.013969203 | 0.899892717 |
| methionine.spermidine         | 0.006656139  | 0.052820753 | 0.899905816 |
| smohc222.pcaac383             | 0.000513003  | 0.004071734 | 0.899923619 |
| pcaec364.smc260               | 0.003020388  | 0.023984223 | 0.899970137 |
| pcaac320.pcaec301             | -0.006570194 | 0.0522145   | 0.9000503   |
| c16.c51                       | -0.005504138 | 0.043764973 | 0.900101671 |
| pcaec422.serotonin            | -0.010659045 | 0.084779426 | 0.900132507 |
| alphaaminoadipicacid.pcaac365 | -0.003021837 | 0.024052769 | 0.900206124 |
| lysopcac203.pcaec382          | -0.000903331 | 0.007191277 | 0.900220946 |
| pcaac381.serotonin            | -0.007361393 | 0.058634348 | 0.90027421  |
| pcaec362.lysopcac203          | -0.002633923 | 0.020985883 | 0.900304374 |
| acetylornithoine.pcaec384     | -0.003699381 | 0.029488834 | 0.900351031 |
| serotonin.pcaec446            | 0.006501582  | 0.051849848 | 0.900396638 |
| methionine.pcaac321           | 0.002491176  | 0.019869059 | 0.900406788 |
| lysopcac180.pcaec322          | 0.006867728  | 0.054854018 | 0.90054868  |
| c142.pcaac361                 | 0.002786007  | 0.022262478 | 0.900593288 |
| pcaac365.pcaac426             | 0.007488197  | 0.059921653 | 0.900733284 |
| glutamicacid.pcaec340         | 0.006787334  | 0.054330861 | 0.900765305 |
| putrescine.pcaec420           | 0.003469228  | 0.027778893 | 0.900795914 |
| smohc141.pcaec383             | -0.005617714 | 0.044982884 | 0.900797188 |
| pcaac300.smc261               | 0.005936218  | 0.047536334 | 0.90080359  |
| pcaac281.pcaac323             | 0.009530321  | 0.076350485 | 0.900846392 |
| pcaec321.c142                 | -0.004878284 | 0.03914664  | 0.901010499 |
| c51.glutamine                 | -0.001692922 | 0.013585359 | 0.901012029 |
| c5.pcaec423                   | 0.003168148  | 0.025435202 | 0.901056375 |
| lysopcac182.c141              | 0.002383514  | 0.019141741 | 0.901086711 |
| pcaac321.pcaec404             | -0.003237779 | 0.026002909 | 0.901089214 |
| c51.lysopcac140               | 0.000195028  | 0.001567989 | 0.901196085 |
| asparagine.pcaec404           | 0.00211635   | 0.017021318 | 0.901232095 |
| c101.glutamicacid             | 0.004471204  | 0.035975247 | 0.901271342 |
| pcaac362.pcaac361             | -0.009261337 | 0.074553928 | 0.901320529 |
| lysopcac203.phenylalanine     | -0.005891019 | 0.047434439 | 0.901344595 |
| smohc241.glutamine            | 0.001252228  | 0.010085526 | 0.901369837 |
| ornithine.lysopcac281         | -0.001039081 | 0.008375007 | 0.901442273 |
| methionine.pcaec384           | 0.002544285  | 0.020527769 | 0.901541624 |

|                                 |              |             |             |
|---------------------------------|--------------|-------------|-------------|
| pcaac361.pcaec445               | 0.004811263  | 0.038826351 | 0.901562246 |
| leucine.asparticacid            | -0.002236586 | 0.018070663 | 0.90167968  |
| pcaec386.pcaac342               | -0.002814946 | 0.022744544 | 0.901683874 |
| serine.pcaec446                 | -0.003597932 | 0.029103458 | 0.901792913 |
| pcaac424.smc180                 | 0.000438528  | 0.00354741  | 0.901798031 |
| pcaac424.c141                   | 0.00535757   | 0.043346682 | 0.901814591 |
| pcaec424.pcaac404               | -0.000875462 | 0.007084264 | 0.90183018  |
| pcaec403.c14                    | 0.006817018  | 0.055217295 | 0.901925358 |
| pcaec420.phenylalanine          | 0.002809181  | 0.022760618 | 0.90195312  |
| pcaac383.lysopcac170            | -0.001052658 | 0.008535539 | 0.902029325 |
| pcaac322.taurine                | 0.002045705  | 0.016598034 | 0.902089905 |
| pcaec301.pcaac383               | -0.000607178 | 0.00492836  | 0.902128693 |
| c2.c3                           | 0.002112238  | 0.017144782 | 0.902129256 |
| pcaec361.pcaac406               | 0.003886806  | 0.031557516 | 0.902156324 |
| creatinine.h1                   | -9.15E-05    | 0.000743284 | 0.90222151  |
| pcaec444.pcaec401               | 0.004251274  | 0.034548193 | 0.902245122 |
| smohc222.pcaac321               | -0.00257728  | 0.020946615 | 0.902255413 |
| pcaec384.lysopcac182            | -0.00434767  | 0.035349754 | 0.902295173 |
| lysopcac161.transhydroxyproline | 0.007000922  | 0.05693143  | 0.902310183 |
| pcaec402.pcaec341               | -0.004434008 | 0.036116352 | 0.902469078 |
| pcaec361.smc160                 | 0.011247401  | 0.091712106 | 0.902573382 |
| isoleucine.pcaec385             | -0.005758676 | 0.046957485 | 0.902575105 |
| methioninesulfoxide.c12         | 0.012021431  | 0.098053074 | 0.902602519 |
| putrescine.smc160               | 0.00522089   | 0.042612837 | 0.902667404 |
| pcaac422.serine                 | -0.009392709 | 0.076703846 | 0.902718752 |
| smohc222.pcaec444               | 0.010859939  | 0.088724946 | 0.902761556 |
| pcaec425.pcaac383               | 0.000517209  | 0.00422721  | 0.902799289 |
| acetylmithoine.pcaec362         | -0.004712329 | 0.038516471 | 0.902804446 |
| pcaec405.ornithine              | 0.005265408  | 0.043043025 | 0.902817774 |
| pcaac386.smc180                 | -0.002619275 | 0.021416378 | 0.902838743 |
| pcaac281.acetylmithoine         | -0.003750758 | 0.030689257 | 0.902906032 |
| ornithine.pcaec301              | 0.009920242  | 0.081201294 | 0.902944575 |
| pcaec365.lysopcac280            | 0.000822678  | 0.006736419 | 0.902979819 |
| c101.pcaac320                   | -0.005058152 | 0.041438531 | 0.903027217 |
| pcaac364.c51                    | -0.00344047  | 0.028197429 | 0.903067047 |
| pcaec363.phenylalanine          | 0.004168191  | 0.034167272 | 0.903082793 |
| smohc141.c16                    | -0.006427032 | 0.052683707 | 0.90308349  |
| pcaac344.pcaec420               | 0.003440267  | 0.02822032  | 0.903150964 |
| smc160.c4                       | -0.001949488 | 0.015994308 | 0.903167641 |
| isoleucine.c51                  | -0.003209358 | 0.026395502 | 0.903404034 |
| acetylmithoine.glycine          | 0.003504956  | 0.028828969 | 0.903411722 |
| pcaac300.transhydroxyproline    | 0.00352355   | 0.029000303 | 0.903472682 |
| pcaec445.pcaec423               | 0.001639218  | 0.013498289 | 0.903521293 |
| pcaac300.c10                    | 0.000312485  | 0.002577456 | 0.903680252 |
| pcaac364.lysopcac203            | -0.001265114 | 0.010435694 | 0.903686912 |

|                                     |              |             |             |
|-------------------------------------|--------------|-------------|-------------|
| smc160.pcaec362                     | 0.001184582  | 0.00977165  | 0.903689334 |
| pcaec322.methioninesulfoxide        | 0.002915719  | 0.024055247 | 0.903702863 |
| lysopcac170.asymmetricdimethylarg   | 0.001673306  | 0.013808849 | 0.903728888 |
| pcaec364.pcaec403                   | -0.004510985 | 0.037230755 | 0.903739561 |
| phenylalanine.asparticacid          | 0.004779671  | 0.039451953 | 0.90374839  |
| pcaec342.threonine                  | 0.004028782  | 0.033258092 | 0.90376009  |
| pcaec365.pcaac381                   | 0.003657882  | 0.030222288 | 0.90384254  |
| creatinine.pcaac366                 | 0.004580405  | 0.037872713 | 0.903914099 |
| pcaec383.pcaac384                   | 0.003804304  | 0.031457364 | 0.903919513 |
| lysine.pcaac300                     | -0.003683012 | 0.030474883 | 0.903983724 |
| pcaec340.pcaec363                   | 0.006236394  | 0.051641783 | 0.904056044 |
| lysopcac160.smc161                  | -0.008739356 | 0.072391426 | 0.904086818 |
| pcaac405.pcaac300                   | 0.00968371   | 0.080249295 | 0.904128949 |
| c181.c10                            | -0.001071242 | 0.008886628 | 0.904227747 |
| pcaec381.pcaac404                   | -0.002262878 | 0.018808124 | 0.904410815 |
| c162.lysopcac170                    | -0.002012304 | 0.016725553 | 0.904411338 |
| lysopcac140.methioninesulfoxide     | 0.00187494   | 0.015597061 | 0.904492008 |
| pcaac343.smc180                     | 0.000598978  | 0.004985245 | 0.904540216 |
| creatinine.pcaac361                 | -0.004755117 | 0.039598546 | 0.904593234 |
| pcaac360.c182                       | 0.003209181  | 0.026733896 | 0.904626013 |
| asymmetricdimethylarginine.ornithin | 0.001504693  | 0.012538073 | 0.904651137 |
| pcaac363.lysine                     | -0.006023546 | 0.050246682 | 0.904754238 |
| pcaac404.pcaac300                   | 0.007350012  | 0.06131803  | 0.904764058 |
| pcaec446.pcaac421                   | -0.007815379 | 0.065202752 | 0.90476749  |
| c16.pcaac320                        | 0.005329568  | 0.044475173 | 0.90479144  |
| pcaac421.pcaac320                   | -0.004292436 | 0.035821771 | 0.904795272 |
| pcaac343.pcaec423                   | 0.000670183  | 0.00559544  | 0.904838338 |
| pcaac420.pcaec424                   | -0.003050036 | 0.025492022 | 0.904938305 |
| pcaec403.pcaec443                   | 0.020087873  | 0.167934597 | 0.904961595 |
| lysopcac170.c51dc                   | -0.012301973 | 0.102848683 | 0.904965458 |
| pcaac381.pcaec341                   | -0.003453423 | 0.028874522 | 0.904974405 |
| pcaac344.smc180                     | 0.001113103  | 0.009306927 | 0.90497573  |
| c51.smc261                          | -0.002862165 | 0.023967929 | 0.905120363 |
| pcaec343.pcaec402                   | 0.004423687  | 0.037052178 | 0.905140695 |
| pcaec382.pcaac383                   | 0.00177471   | 0.014872824 | 0.905192111 |
| c141oh.pcaac360                     | -0.002111852 | 0.017698825 | 0.905195369 |
| c142.asymmetricdimethylarginine     | 0.000946738  | 0.007938882 | 0.905249319 |
| pcaec343.pcaec420                   | 0.002346038  | 0.019681607 | 0.905291882 |
| pcaec362.pcaec301                   | 0.0067669    | 0.056772386 | 0.905296642 |
| lysopcac280.pcaec403                | -0.00172916  | 0.014518911 | 0.905372899 |
| pcaec383.serotonin                  | -0.010972442 | 0.092167777 | 0.905411263 |
| c0.threonine                        | -0.004398724 | 0.036978714 | 0.905486938 |
| pcaac422.pcaac360                   | -0.004057062 | 0.034117775 | 0.90551811  |
| lysopcac140.pcaec420                | 0.003391136  | 0.028531923 | 0.90556504  |
| smc160.pcaac406                     | 0.003890725  | 0.03276374  | 0.905646621 |

|                              |              |             |             |
|------------------------------|--------------|-------------|-------------|
| smohc222.c3                  | -0.001775246 | 0.01495734  | 0.905696947 |
| smohc161.pcaec384            | 0.0077707    | 0.065492301 | 0.905725977 |
| pcaec420.pcaec444            | 0.010357889  | 0.087299294 | 0.905728006 |
| smc180.c3                    | -0.001611444 | 0.013585254 | 0.90575245  |
| pcaac363.pcaec385            | -0.005397908 | 0.045515884 | 0.905770785 |
| methionine.c10               | 0.00060407   | 0.005098519 | 0.905861237 |
| pcaec383.pcaec402            | -0.008977393 | 0.075787066 | 0.90588028  |
| pcaac386.pcaec423            | -0.000333835 | 0.002819677 | 0.90592829  |
| pcaec424.pcaec322            | 0.004837965  | 0.040897388 | 0.906007028 |
| pcaac384.pcaac405            | -0.007182855 | 0.060751522 | 0.906055949 |
| pcaec380.pcaec382            | -0.00302717  | 0.025621312 | 0.906121503 |
| c142.methionine              | -0.002401324 | 0.020332214 | 0.906157903 |
| histidine.pcaec384           | 0.001909888  | 0.016176965 | 0.906191297 |
| pcaec423.pcaec341            | 0.003200644  | 0.027111442 | 0.906196909 |
| lysopcac160.lysopcac161      | -0.008754051 | 0.074250064 | 0.906319909 |
| pcaec445.pcaec362            | -0.001588517 | 0.01348431  | 0.906394826 |
| pcaec443.glutamicacid        | 0.007857141  | 0.066721761 | 0.906430457 |
| smc180.pcaac300              | -0.004397477 | 0.037343918 | 0.906433322 |
| alphaaminoadipicacid.c141oh  | -0.010493816 | 0.089133016 | 0.906452377 |
| pcaec382.c142                | -0.002792298 | 0.023754255 | 0.906596877 |
| pcaec384.pcaac364            | -0.004986117 | 0.042460491 | 0.906691632 |
| pcaec361.pcaec420            | 0.002240244  | 0.019095123 | 0.906778143 |
| smc241.c142                  | 0.003654185  | 0.031154908 | 0.906801367 |
| pcaac281.pcaec444            | -0.012594679 | 0.107604335 | 0.90699485  |
| pcaec423.pcaec402            | 0.004486864  | 0.0383446   | 0.90702014  |
| h1.pcaac240                  | -0.001762759 | 0.015066098 | 0.907030039 |
| c12.pcaac380                 | -0.004361152 | 0.037284332 | 0.907055043 |
| h1.c102                      | 0.000934759  | 0.007992643 | 0.907069017 |
| lysopcac281.pcaac405         | 0.00768181   | 0.065716111 | 0.907115353 |
| pcaec443.threonine           | -0.002289659 | 0.019592182 | 0.907137408 |
| pcaac424.histidine           | 0.009405989  | 0.080496821 | 0.907150683 |
| pcaac401.smc202              | -0.008382457 | 0.071745626 | 0.907161281 |
| smc160.pcaec401              | -0.003640637 | 0.031165922 | 0.907177996 |
| c10.pcaac364                 | 0.004921334  | 0.042131678 | 0.907182944 |
| c162.pcaac361                | 0.003809404  | 0.032617853 | 0.907198352 |
| smohc241.pcaec301            | 0.005723147  | 0.049005034 | 0.907199932 |
| c141.serine                  | 0.004120422  | 0.035293572 | 0.907231442 |
| pcaec300.smohc241            | 0.006738289  | 0.057775617 | 0.907325175 |
| pcaec321.smc240              | 0.002589     | 0.022213249 | 0.907385704 |
| pcaac322.ornithine           | 0.003317169  | 0.028462984 | 0.907392674 |
| pcaac342.pcaec365            | -0.002602025 | 0.022342933 | 0.907459699 |
| creatinine.c141              | -0.002097729 | 0.018014019 | 0.907466583 |
| arginine.smohc141            | 0.002414023  | 0.020745325 | 0.907533393 |
| pcaec360.c142                | 0.004701172  | 0.040405709 | 0.907546167 |
| methioninesulfoxide.pcaec382 | -0.002367394 | 0.02037164  | 0.907656061 |

|                              |              |             |             |
|------------------------------|--------------|-------------|-------------|
| isoleucine.pcaac362          | -0.000928993 | 0.007997571 | 0.907696333 |
| pcaec322.lysopcac140         | -0.000127833 | 0.001101048 | 0.90774259  |
| pcaac365.pcaac360            | -0.004076617 | 0.03511684  | 0.907753389 |
| pcaac365.pcaec301            | -0.008324531 | 0.071760531 | 0.907818993 |
| citrusline.pcaec382          | -0.000862481 | 0.007445984 | 0.907955483 |
| pcaec361.pcaac320            | 0.011356352  | 0.098107532 | 0.908016903 |
| pcaec360.phenylalanine       | 0.002937802  | 0.025391517 | 0.908059629 |
| c3.pcaac402                  | -0.005932155 | 0.051272573 | 0.90806098  |
| pcaec404.smc261              | 0.006888781  | 0.059576747 | 0.908116139 |
| smc160.asparagine            | -0.000777607 | 0.006729476 | 0.908176445 |
| pcaec424.smohc241            | 0.006247079  | 0.054143441 | 0.908312753 |
| leucine.pcaac320             | -0.011295313 | 0.097917382 | 0.908332221 |
| c162.pcaac366                | -0.00652245  | 0.056558594 | 0.908358757 |
| pcaec425.threonine           | 0.002134231  | 0.018513186 | 0.908390685 |
| isoleucine.c16               | -0.005159042 | 0.04476023  | 0.908408194 |
| pcaac425.c142                | 0.003725294  | 0.032333251 | 0.908442957 |
| pcaac322.c10                 | 0.000771448  | 0.006699947 | 0.908500851 |
| lysopcac170.pcaec365         | -0.002712201 | 0.023557024 | 0.908507952 |
| leucine.pcaec446             | -0.004174558 | 0.036265994 | 0.908526921 |
| putrescine.lysine            | -0.004936318 | 0.042918231 | 0.908600193 |
| lysopcac140.pcaec402         | 0.006840417  | 0.059520813 | 0.908673007 |
| pcaac403.smohc241            | -0.006419408 | 0.05586711  | 0.908688687 |
| pcaac342.pcaec362            | 0.001723213  | 0.014997668 | 0.908693618 |
| pcaac424.methionine          | -0.002816938 | 0.024543969 | 0.908794596 |
| smc240.c12                   | -0.004327464 | 0.037806469 | 0.909037901 |
| pcaac401.lysopcac180         | -0.006274834 | 0.05483077  | 0.909056549 |
| smc161.pcaec383              | -0.007730799 | 0.067554133 | 0.909057674 |
| lysopcac160.isoleucine       | -0.002905127 | 0.025395553 | 0.90909209  |
| pcaec322.lysopcac281         | -0.004282139 | 0.037436899 | 0.909101774 |
| pcaec364.pcaec424            | 0.002053174  | 0.017956921 | 0.909136558 |
| pcaec341.lysopcac281         | 0.003012451  | 0.02636321  | 0.909193266 |
| pcaac380.pcaec380            | 0.005826456  | 0.050993853 | 0.909200552 |
| pcaec383.pcaac361            | -0.004814019 | 0.042136177 | 0.909207618 |
| pcaec381.pcaac424            | 0.005118561  | 0.044814213 | 0.909232706 |
| pcaac380.c12                 | 0.004594867  | 0.040249943 | 0.909279394 |
| pcaac362.pcaec362            | 0.001708249  | 0.014964851 | 0.909285421 |
| pcaac384.phenylalanine       | 0.004224263  | 0.037018607 | 0.90931617  |
| pcaec406.pcaec343            | -0.008969226 | 0.078752659 | 0.909490869 |
| pcaec342.pcaac320            | 0.008049773  | 0.070696598 | 0.909512569 |
| pcaac320.pcaac364            | -0.007454369 | 0.065478259 | 0.909527372 |
| lysopcac181.pcaac363         | 0.001489175  | 0.013080754 | 0.909527544 |
| c16.pcaac300                 | -0.004383016 | 0.038528706 | 0.909594781 |
| pcaec403.methioninesulfoxide | 0.002058239  | 0.018109759 | 0.909678807 |
| lysopcac160.glutamicacid     | -0.003616723 | 0.031852793 | 0.909764774 |
| smc260.smohc141              | -0.001207532 | 0.010648833 | 0.909882868 |

|                              |              |             |             |
|------------------------------|--------------|-------------|-------------|
| pcaac385.pcaec420            | -0.002651708 | 0.023387549 | 0.909894325 |
| lysopcac280.pcaec384         | 0.005876188  | 0.051891614 | 0.91000634  |
| smc261.c102                  | -0.002110606 | 0.018645519 | 0.910040557 |
| c3.pcaac426                  | -0.003025199 | 0.026729431 | 0.91005466  |
| smc180.pcaec362              | 0.003522563  | 0.03112494  | 0.91005755  |
| pcaec423.lysopcac204         | -0.003540005 | 0.031348433 | 0.910255741 |
| pcaac380.c162                | -0.005494162 | 0.048655312 | 0.910259211 |
| pcaec341.pcaac281            | 0.000398859  | 0.003532808 | 0.910273997 |
| pcaac321.smc202              | -0.003560863 | 0.031542774 | 0.910283039 |
| pcaec301.smc181              | 0.002704703  | 0.023962347 | 0.910296422 |
| smc180.c18                   | -0.003093558 | 0.027427219 | 0.91036093  |
| pcaac402.asparagine          | -0.001977871 | 0.017542303 | 0.910394873 |
| pcaac342.pcaec340            | -0.005995221 | 0.05320291  | 0.910444478 |
| smc160.isoleucine            | 0.001950327  | 0.017314744 | 0.910481128 |
| pcaec404.c141                | -0.003647041 | 0.032384963 | 0.910500429 |
| pcaac420.kynurenine          | 0.001552797  | 0.013809121 | 0.910633405 |
| pcaac320.pcaec420            | 0.00254473   | 0.022640402 | 0.91067257  |
| c142.pcaec360                | -0.000719902 | 0.006409306 | 0.910732953 |
| serotonin.c12                | 0.004426103  | 0.039423414 | 0.910772937 |
| c101.pcaec340                | 0.003081798  | 0.027450143 | 0.910774519 |
| pcaac360.histidine           | -0.006061751 | 0.053993405 | 0.910774951 |
| alanine.c0                   | 0.000189444  | 0.001688977 | 0.91085698  |
| pcaec322.pcaec380            | -0.004594577 | 0.041002214 | 0.910942379 |
| c0.c51dc                     | -0.011123722 | 0.099367303 | 0.911030477 |
| pcaec381.lysopcac280         | -0.001039872 | 0.009306624 | 0.911197378 |
| pcaec421.c101                | -0.001326871 | 0.011876166 | 0.911204533 |
| methioninesulfoxide.pcaac383 | 0.001485471  | 0.013296771 | 0.911211545 |
| pcaec422.pcaac363            | -0.002627684 | 0.0235298   | 0.911244755 |
| pcaac401.c142                | -0.003081354 | 0.02764353  | 0.911408821 |
| lysopcac203.pcaec384         | -0.002416834 | 0.021690947 | 0.911445337 |
| smc180.pcaac386              | 0.001042561  | 0.009357834 | 0.911453867 |
| pcaec341.smohc141            | -0.003402187 | 0.030555801 | 0.911506997 |
| c101.c182                    | 0.004468734  | 0.040161346 | 0.911565466 |
| pcaac322.pcaec343            | 0.011073239  | 0.099525863 | 0.911573075 |
| c5.c16                       | 0.005711631  | 0.051390957 | 0.911667365 |
| pcaec382.c141                | -0.004048857 | 0.036430263 | 0.91166805  |
| alanine.c18                  | 0.004952187  | 0.044580656 | 0.911712492 |
| pcaac422.c142                | 0.004493287  | 0.040460018 | 0.911735268 |
| arginine.c10                 | 0.000950311  | 0.008564317 | 0.911809134 |
| pcaec343.c142                | 0.002986243  | 0.026921057 | 0.911837441 |
| pcaec342.pcaac323            | -0.00819993  | 0.073974915 | 0.911899547 |
| pcaac360.pcaac321            | -0.003981807 | 0.035957334 | 0.911986984 |
| lysopcac182.pcaac364         | 0.004247707  | 0.038370882 | 0.912015205 |
| pcaac402.pcaac360            | -0.006295984 | 0.056886444 | 0.912034976 |
| pcaec382.c2                  | -0.011853934 | 0.107238474 | 0.912144423 |



|                              |              |             |             |
|------------------------------|--------------|-------------|-------------|
| pcaac404.pcaac360            | 0.00275632   | 0.024940028 | 0.91216038  |
| pcaec381.c12                 | 0.006986157  | 0.063252662 | 0.91221538  |
| pcaec444.pcaec301            | 0.004702437  | 0.042581545 | 0.912227047 |
| pcaec321.asparticacid        | -0.003866011 | 0.035060467 | 0.912359023 |
| pcaac323.pcaec402            | -0.002650776 | 0.024070634 | 0.91247147  |
| pcaec446.pcaec365            | 0.002536503  | 0.023037741 | 0.912489545 |
| pcaec445.methioninesulfoxide | -0.001383588 | 0.012567565 | 0.912497524 |
| pcaac366.pcaac320            | -0.007564768 | 0.068714521 | 0.912499261 |
| pcaac406.creatinine          | -0.002823484 | 0.025658288 | 0.912537256 |
| pcaac402.smohc241            | -0.00680134  | 0.061824301 | 0.912561803 |
| pcaec404.lysine              | -0.008641275 | 0.078561872 | 0.912575691 |
| pcaac281.pcaec423            | 0.000573721  | 0.005216239 | 0.912580305 |
| smohc221.glycine             | -0.005238011 | 0.047623858 | 0.912580542 |
| c142.glutamine               | 0.003518058  | 0.031990109 | 0.912591488 |
| acetylmithoine.c14           | -0.00083317  | 0.007579639 | 0.912631961 |
| leucine.pcaac362             | -0.001129507 | 0.010286811 | 0.912727466 |
| pcaec383.pcaec420            | -0.003096688 | 0.028220566 | 0.912782804 |
| lysine.c51                   | -0.003608527 | 0.032887184 | 0.912788502 |
| pcaec343.phenylalanine       | 0.003606724  | 0.032872249 | 0.91279245  |
| c2.c51                       | -0.007401834 | 0.067464389 | 0.912796205 |
| lysopcac280.pcaec423         | -0.000368225 | 0.003359517 | 0.912881796 |
| c101.pcaac404                | -0.000291478 | 0.002663263 | 0.913010566 |
| pcaec364.pcaac360            | -0.003315758 | 0.030303908 | 0.913031988 |
| serine.c10                   | 0.000452966  | 0.004140342 | 0.913042923 |
| arginine.pcaec401            | 0.007695588  | 0.070388969 | 0.913101157 |
| c8.c181                      | 0.003379975  | 0.030936304 | 0.913159354 |
| pcaec404.pcaac383            | 0.000559266  | 0.005121123 | 0.91319755  |
| pcaec421.c182                | 0.003199775  | 0.029313166 | 0.913236663 |
| pcaac404.creatinine          | -0.002264355 | 0.020775073 | 0.913366848 |
| lysine.pcaac364              | 0.00356421   | 0.032708103 | 0.913385542 |
| pcaac406.pcaac365            | -0.005466014 | 0.050186586 | 0.913430185 |
| prolinr.pcaec365             | 0.001664309  | 0.015282589 | 0.913439351 |
| c8.putrescine                | -0.003223219 | 0.029615327 | 0.913491673 |
| glycine.pcaac320             | -0.001173049 | 0.010784876 | 0.913545691 |
| pcaec381.methioninesulfoxide | -0.002167549 | 0.019932931 | 0.913566158 |
| pcaac384.lysopcac182         | 0.002917417  | 0.026840721 | 0.913604499 |
| pcaec322.smc202              | 0.006284205  | 0.057878355 | 0.913697602 |
| c5.pcaec363                  | -0.002145971 | 0.019780173 | 0.913764944 |
| lysopcac280.pcaec420         | -0.00263819  | 0.024318386 | 0.913769381 |
| pcaac240.c142                | 0.003380112  | 0.03116145  | 0.91378084  |
| pcaac404.pcaac343            | 0.003099774  | 0.028615427 | 0.913896164 |
| c16.c142                     | 0.007987987  | 0.073801658 | 0.913966943 |
| pcaac322.c18                 | 0.003911286  | 0.036193707 | 0.914101946 |
| histidine.c142               | -0.003068813 | 0.028418588 | 0.914164701 |
| pcaac384.pcaec420            | 0.001764408  | 0.016343468 | 0.914186951 |

|                                    |              |             |             |
|------------------------------------|--------------|-------------|-------------|
| pcaac322.pcaac362                  | -0.002990213 | 0.027730095 | 0.914286122 |
| pcaac421.histidine                 | 0.007842389  | 0.072728037 | 0.914286943 |
| lysopcac180.pcaec365               | -0.00241872  | 0.022479411 | 0.914472699 |
| pcaec404.pcaac363                  | -0.001680057 | 0.015623812 | 0.914524384 |
| pcaac362.valine                    | -0.00306435  | 0.028526543 | 0.914612137 |
| c141oh.c12                         | 0.005221843  | 0.048645244 | 0.914672018 |
| pcaac363.smohc241                  | -0.005495701 | 0.05119974  | 0.914677503 |
| pcaac361.pcaac383                  | 0.000610967  | 0.005692067 | 0.914679023 |
| lysopcac281.pcaec421               | 0.000304626  | 0.002838395 | 0.91468948  |
| lysopcac181.lysopcac204            | 0.004661428  | 0.043436846 | 0.914696024 |
| pcaec421.c141                      | -0.005616311 | 0.052350298 | 0.914721207 |
| c14.c16                            | 0.004081215  | 0.038079497 | 0.914806005 |
| pcaec425.lysine                    | -0.009469228 | 0.088457414 | 0.914907153 |
| pcaec343.alphaaminoadipicacid      | 0.00092054   | 0.008600254 | 0.914916753 |
| alphaaminoadipicacid.pcaac361      | -0.004653761 | 0.043492926 | 0.914945184 |
| smc160.pcaac361                    | 0.005582496  | 0.052220653 | 0.915023051 |
| pcaec421.alanine                   | -0.001523041 | 0.014249588 | 0.915038018 |
| lysopcac182.asymmetricdimethylarg  | 0.001832272  | 0.017193774 | 0.915289189 |
| asymmetricdimethylarginine.pcaac34 | 0.002356653  | 0.022130377 | 0.915349765 |
| c102.pcaec384                      | -0.003024656 | 0.028408061 | 0.91536382  |
| pcaac322.pcaec423                  | 0.000428282  | 0.004026815 | 0.915454342 |
| pcaec424.pcaec403                  | -0.004918686 | 0.046332805 | 0.915610767 |
| pcaec385.pcaac360                  | 0.003915946  | 0.036941933 | 0.915735235 |
| pcaec384.c162                      | -0.007615926 | 0.071938512 | 0.915842601 |
| pcaec360.c14                       | -0.006862971 | 0.06489326  | 0.915929178 |
| pcaec382.serine                    | -0.009315256 | 0.088197055 | 0.916039391 |
| pcaec342.c142                      | 0.00335815   | 0.031812961 | 0.916086503 |
| smohc241.tyrosine                  | 0.006741531  | 0.063877762 | 0.916103294 |
| smc180.pcaac403                    | 0.001048101  | 0.009954034 | 0.916296424 |
| pcaec406.pcaec421                  | -0.000175522 | 0.001667012 | 0.916298755 |
| pcaac405.smc260                    | -0.00207812  | 0.01976179  | 0.916403873 |
| lysopcac181.pcaac361               | -0.006520692 | 0.062057451 | 0.916469907 |
| c51.pcaec380                       | -0.003231165 | 0.030757766 | 0.916488187 |
| alphaaminoadipicacid.asparagine    | 0.000807697  | 0.00768964  | 0.916500089 |
| h1.c18                             | -0.003138165 | 0.029916624 | 0.916610948 |
| pcaec422.pcaac364                  | -0.00443274  | 0.042262262 | 0.916619295 |
| methionine.asparagine              | -0.00088845  | 0.00847076  | 0.916621035 |
| smc161.pcaec403                    | -0.003110736 | 0.029667303 | 0.916645014 |
| smc181.alanine                     | -0.001725412 | 0.016462187 | 0.916679369 |
| pcaec342.asymmetricdimethylarginir | 0.004413474  | 0.042197872 | 0.916854137 |
| pcaac425.glutamicacid              | 0.005352026  | 0.05117664  | 0.916862448 |
| c14.c141oh                         | -0.015087528 | 0.144324303 | 0.916894456 |
| pcaec424.serotonin                 | 0.008842904  | 0.084591648 | 0.916896589 |
| glycine.pcaec386                   | 0.001084541  | 0.010382626 | 0.91695925  |
| pcaec341.smc240                    | 0.002007468  | 0.019231435 | 0.917016722 |

|                                   |              |             |             |
|-----------------------------------|--------------|-------------|-------------|
| pcaac403.c142                     | -0.003030044 | 0.029038437 | 0.917047414 |
| pcaec362.tyrosine                 | 0.005168927  | 0.0495404   | 0.917054022 |
| pcaac402.smohc141                 | 0.002631677  | 0.025231932 | 0.917084237 |
| lysopcac161.putrescine            | 0.007028667  | 0.06738961  | 0.917084629 |
| creatinine.c142                   | -0.004453224 | 0.042727567 | 0.917144271 |
| isoleucine.pcaec365               | 0.002578934  | 0.024750465 | 0.91716508  |
| pcaac363.c141oh                   | 0.009702781  | 0.093193076 | 0.917230487 |
| asparagine.pcaec405               | -0.003995941 | 0.038394023 | 0.917260319 |
| pcaec443.c182                     | -0.003892619 | 0.037404201 | 0.917266761 |
| pcaec383.pcaec446                 | 0.004531372  | 0.043651615 | 0.917473794 |
| lysopcac161.pcaec386              | 0.000814978  | 0.007852344 | 0.917489504 |
| c51dc.asymmetricdimethylarginine  | 0.002011248  | 0.019382432 | 0.917506377 |
| putrescine.smc260                 | 0.001674197  | 0.016141719 | 0.91754433  |
| lysopcac160.asymmetricdimethylarg | 0.002042768  | 0.019697343 | 0.917552906 |
| lysopcac160.smohc222              | -0.005009904 | 0.048323972 | 0.917580254 |
| smohc221.pcaec360                 | 0.000631592  | 0.006104901 | 0.917751946 |
| pcaec301.taurine                  | 0.002263371  | 0.02189184  | 0.917805582 |
| c5.pcaec362                       | -0.001393557 | 0.0134804   | 0.917815305 |
| pcaec404.smohc221                 | -0.009524147 | 0.092138749 | 0.917822512 |
| methioninesulfoxide.c182          | -0.006513108 | 0.063106936 | 0.917949229 |
| histidine.pcaec365                | -0.00224815  | 0.021791938 | 0.917983427 |
| pcaec422.threonine                | 0.001992419  | 0.019320842 | 0.918016336 |
| smc161.pcaec401                   | -0.004888734 | 0.0474285   | 0.918053485 |
| pcaac240.c182                     | -0.003492048 | 0.033907582 | 0.918123704 |
| pcaac361.pcaac421                 | -0.003550767 | 0.034481192 | 0.918131877 |
| c51.methioninesulfoxide           | 0.001296753  | 0.012592957 | 0.918133806 |
| pcaac402.taurine                  | -0.006323097 | 0.061430059 | 0.918167733 |
| pcaac406.c141oh                   | 0.006661911  | 0.064737127 | 0.918187167 |
| c12.pcaac401                      | -0.00024501  | 0.002383124 | 0.918263726 |
| pcaac322.pcaec384                 | -0.004832591 | 0.047056658 | 0.918353391 |
| creatinine.pcaec365               | -0.002754272 | 0.026826297 | 0.918374533 |
| c18.pcaac300                      | -0.004315095 | 0.042058961 | 0.91843337  |
| pcaac406.pcaac422                 | -0.003475433 | 0.033960864 | 0.918639291 |
| smc202.pcaec402                   | -0.004558439 | 0.044579194 | 0.918703904 |
| smc160.pcaac424                   | -0.000796425 | 0.007788855 | 0.918706247 |
| glycine.pcaac365                  | -0.006450169 | 0.063097015 | 0.91872659  |
| c181.c12                          | 0.006241404  | 0.061077149 | 0.918756197 |
| lysine.c142                       | -0.004974516 | 0.048772053 | 0.918909609 |
| h1.c8                             | 0.001441546  | 0.014164039 | 0.919084006 |
| serotonin.pcaac360                | 0.002036052  | 0.020012754 | 0.919113632 |
| pcaec445.acetylmethionine         | -0.00600394  | 0.059045479 | 0.919156718 |
| smc161.pcaec423                   | 0.000706382  | 0.006947073 | 0.919158919 |
| c2.pcaec383                       | -0.009281499 | 0.09135684  | 0.919225814 |
| lysine.pcaec423                   | 0.000757946  | 0.007466904 | 0.919296084 |
| c10.pcaac320                      | 0.004339484  | 0.042759266 | 0.919312736 |

|                                    |              |             |             |
|------------------------------------|--------------|-------------|-------------|
| pcaec380.pcaec322                  | -0.007531529 | 0.07432413  | 0.919433826 |
| glycine.pcaac361                   | 0.002252783  | 0.022234706 | 0.919445903 |
| pcaec403.kynurenine                | 0.000796215  | 0.007865505 | 0.919516855 |
| pcaac384.pcaec421                  | 7.88E-05     | 0.000778289 | 0.919526109 |
| pcaac425.pcaac320                  | -0.010254491 | 0.101325976 | 0.919537293 |
| c0.c16                             | 0.004333844  | 0.04282987  | 0.919549618 |
| c162.pcaac424                      | -0.000608544 | 0.006019    | 0.919615827 |
| lysopcac281.smohc241               | -0.005710241 | 0.056486048 | 0.919625881 |
| pcaac300.pcaac364                  | 0.005677779  | 0.056180804 | 0.919648503 |
| lysopcac204.c182                   | 0.002298994  | 0.0227512   | 0.919659009 |
| pcaac421.lysine                    | -0.007339628 | 0.072657029 | 0.919684295 |
| smc241.pcaec362                    | 0.001217082  | 0.012051217 | 0.919704078 |
| smohc161.pcaac426                  | 0.003873674  | 0.038372535 | 0.919738439 |
| pcaac420.smohc241                  | -0.004855274 | 0.048118336 | 0.919775157 |
| pcaac424.pcaec421                  | -0.002756504 | 0.02733232  | 0.919815835 |
| prolinr.methionine                 | -0.001676961 | 0.016645083 | 0.919897687 |
| asparticacid.histidine             | 0.005341862  | 0.053070553 | 0.919970816 |
| pcaec420.kynurenine                | -0.000953222 | 0.009472653 | 0.91999225  |
| pcaac342.c142                      | -0.001972873 | 0.019605647 | 0.91999305  |
| pcaac300.pcaec340                  | -0.007442677 | 0.074021919 | 0.92005712  |
| pcaac384.pcaec423                  | 0.000730769  | 0.007269207 | 0.920071034 |
| pcaac383.pcaec385                  | 0.004769526  | 0.04744639  | 0.920074866 |
| lysopcac281.pcaac343               | -0.002811122 | 0.027984953 | 0.92013297  |
| pcaac320.asymmetricdimethylarginir | 0.004275737  | 0.042586825 | 0.92017317  |
| c5.valine                          | -0.009252813 | 0.092322137 | 0.920313702 |
| phenylalanine.serotonin            | 0.006849455  | 0.06836774  | 0.920343533 |
| pcaac281.glutamicacid              | -0.003120922 | 0.031157888 | 0.920359956 |
| c12.c16                            | 0.002706057  | 0.027032694 | 0.920408791 |
| c102.pcaac344                      | -0.003721314 | 0.03718864  | 0.920438316 |
| c3.pcaec363                        | -0.001383631 | 0.013833638 | 0.920475226 |
| c182.lysopcac280                   | -0.00134407  | 0.013440559 | 0.920489679 |
| pcaec403.pcaac320                  | -0.007415974 | 0.074206973 | 0.920540954 |
| pcaec424.lysopcac140               | 0.000138321  | 0.001384462 | 0.920562375 |
| pcaac422.pcaec322                  | 0.005597395  | 0.056136334 | 0.920719746 |
| smc160.lysopcac140                 | -7.16E-05    | 0.000717714 | 0.920734237 |
| lysopcac161.c10                    | 0.000906151  | 0.009115764 | 0.920962124 |
| pcaac420.pcaac426                  | 0.008843991  | 0.089046104 | 0.921029989 |
| smc260.c142                        | 0.004061454  | 0.04091804  | 0.921078299 |
| alphaaminoadipicacid.pcaec420      | -0.002109972 | 0.021262207 | 0.921096127 |
| asparagine.pcaac406                | 0.001578995  | 0.015945282 | 0.921262486 |
| pcaec301.pcaac401                  | 0.000833961  | 0.008439934 | 0.921432468 |
| pcaac342.pcaec386                  | 0.000968316  | 0.009805953 | 0.921482846 |
| c141.smc160                        | -0.006370601 | 0.064552348 | 0.92152952  |
| smc260.c12                         | -0.00393002  | 0.039824184 | 0.921533207 |
| lysopcac204.pcaac401               | -0.000235029 | 0.002381812 | 0.921539297 |

|                              |              |             |             |
|------------------------------|--------------|-------------|-------------|
| pcaac424.pcaec365            | 0.002266796  | 0.023010145 | 0.921669024 |
| putrescine.pcaec421          | -0.000431579 | 0.004383073 | 0.921707028 |
| smc180.c51dc                 | -0.009351986 | 0.094982766 | 0.921711109 |
| lysopcac180.pcaac323         | -0.005822    | 0.059196428 | 0.921797712 |
| pcaac323.c141oh              | -0.00545985  | 0.055522799 | 0.921809798 |
| pcaac405.c3                  | 0.003777826  | 0.038428844 | 0.921832179 |
| ornithine.h1                 | -0.00019419  | 0.001977558 | 0.921919453 |
| lysopcac204.pcaec384         | -0.003666678 | 0.037351572 | 0.921943448 |
| pcaec421.c3                  | -0.003778522 | 0.038501058 | 0.921963983 |
| pcaac240.pcaec300            | -0.004437698 | 0.045242624 | 0.922006848 |
| pcaac321.c2                  | -0.007722595 | 0.078787173 | 0.922060921 |
| pcaec382.pcaac344            | 0.00825611   | 0.08424937  | 0.922078611 |
| c16.c14                      | 0.004883729  | 0.049840823 | 0.922086213 |
| c12.glutamicacid             | 0.003690349  | 0.037664672 | 0.922092126 |
| pcaac385.lysopcac140         | 7.87E-05     | 0.000803234 | 0.922102587 |
| leucine.h1                   | -0.000135352 | 0.001385042 | 0.922294028 |
| pcaec383.smc160              | -0.005447755 | 0.055750669 | 0.9223003   |
| c182.c10                     | -0.000326742 | 0.003345332 | 0.92233621  |
| pcaac386.pcaac404            | 0.000846319  | 0.008667257 | 0.922356475 |
| pcaac383.pcaac344            | -0.005301927 | 0.054344097 | 0.922422575 |
| pcaec380.pcaec446            | -0.004624834 | 0.047406863 | 0.922427269 |
| serotonin.c182               | -0.000943923 | 0.009677067 | 0.922438309 |
| asparticacid.pcaec341        | 0.002764796  | 0.02835536  | 0.922467676 |
| pcaac320.smohc241            | -0.004476211 | 0.045919997 | 0.922488891 |
| smc181.pcaac320              | 0.003739558  | 0.038377543 | 0.922518354 |
| prolinr.alphaaminoadipicacid | 0.001072489  | 0.011006633 | 0.922519202 |
| pcaac381.transhydroxyproline | 0.004407482  | 0.045234864 | 0.922522957 |
| c141oh.lysopcac170           | -0.002134116 | 0.021913946 | 0.922562047 |
| pcaac426.pcaec385            | -0.00439458  | 0.045130196 | 0.922570429 |
| pcaac365.acetylmithoine      | -0.008008164 | 0.082257156 | 0.922586588 |
| pcaac406.c51                 | -0.00514806  | 0.05288821  | 0.922599827 |
| smc180.smohc141              | -0.001810028 | 0.018598582 | 0.922613922 |
| pcaec300.pcaac342            | -0.001292202 | 0.013288705 | 0.922677444 |
| smohc161.c182                | -0.001889039 | 0.01942948  | 0.922689472 |
| pcaac323.pcaec384            | 0.001761533  | 0.018120761 | 0.922701073 |
| prolinr.c14                  | -0.002830342 | 0.029127409 | 0.922732537 |
| c14.pcaac421                 | 0.001528955  | 0.015745075 | 0.922783415 |
| phenylalanine.lysopcac281    | -0.000603852 | 0.006219318 | 0.922794447 |
| lysopcac180.pcaac422         | -0.004922702 | 0.050710034 | 0.922808309 |
| pcaac322.c16                 | -0.003169274 | 0.032647956 | 0.922809332 |
| pcaac323.pcaec423            | -0.000492553 | 0.005077438 | 0.922861723 |
| lysopcac280.smc180           | 0.000371889  | 0.003836365 | 0.922917365 |
| glutamicacid.pcaac341        | 0.000867029  | 0.008948537 | 0.922954911 |
| lysopcac203.c10              | 0.000420181  | 0.004336698 | 0.922955735 |
| lysopcac180.pcaac384         | 0.006045557  | 0.062454582 | 0.92302728  |

|                                    |              |             |             |
|------------------------------------|--------------|-------------|-------------|
| c5.c182                            | -0.005066415 | 0.052343686 | 0.923033557 |
| c8.pcaac320                        | 0.003594066  | 0.03713222  | 0.923033798 |
| serine.pcaec342                    | 0.007131754  | 0.073692921 | 0.923045199 |
| pcaec343.pcaac363                  | 0.001057909  | 0.01093837  | 0.923093703 |
| pcaec446.c182                      | -0.002669204 | 0.027599111 | 0.92309534  |
| pcaac386.asymmetricdimethylarginir | 0.001247695  | 0.012902073 | 0.92310196  |
| pcaac385.h1                        | 8.94E-05     | 0.000924448 | 0.923107817 |
| smc181.pcaac323                    | 0.008570688  | 0.088667641 | 0.923137006 |
| phenylalanine.pcaec322             | 0.005719787  | 0.059241645 | 0.923224775 |
| smc260.smc241                      | -0.008395092 | 0.08698624  | 0.923256113 |
| prolinr.smc260                     | 0.001586542  | 0.016450357 | 0.923308722 |
| pcaec425.pcaac426                  | 0.006642072  | 0.068880852 | 0.923321232 |
| pcaac322.lysopcac140               | 0.000122116  | 0.001266575 | 0.923332145 |
| histidine.c10                      | 0.000196811  | 0.002041807 | 0.92335125  |
| lysopcac161.c18                    | -0.007151189 | 0.074192993 | 0.923354622 |
| pcaac426.pcaac401                  | 0.001031311  | 0.010702758 | 0.923375957 |
| lysopcac280.serotonin              | -0.009345205 | 0.097011054 | 0.923398192 |
| pcaac424.methioninesulfoxide       | 0.001785496  | 0.018546312 | 0.923444989 |
| pcaac321.c141oh                    | 0.007524499  | 0.078188856 | 0.923474619 |
| pcaec341.asparticacid              | 0.003012839  | 0.031314327 | 0.923492176 |
| putrescine.lysopcac180             | -0.005672486 | 0.058976937 | 0.923517029 |
| pcaec363.pcaac424                  | -0.001106559 | 0.011511352 | 0.923559685 |
| pcaec321.pcaac403                  | -0.00059204  | 0.006160423 | 0.923578582 |
| pcaec405.pcaec365                  | 0.002900572  | 0.03019328  | 0.923607894 |
| h1.pcaec365                        | -0.003164099 | 0.032975197 | 0.923697401 |
| c0.pcaec384                        | 0.002694264  | 0.028079947 | 0.923700686 |
| pcaac321.pcaac320                  | 0.003166035  | 0.03302207  | 0.923758883 |
| smohc161.pcaac366                  | 0.003263536  | 0.034040316 | 0.923761808 |
| arginine.smohc241                  | 0.005203498  | 0.054345711 | 0.923860554 |
| pcaec322.isoleucine                | 0.002201437  | 0.023009515 | 0.923918442 |
| c18.arginine                       | -0.004349115 | 0.04548278  | 0.923961204 |
| c182.pcaec385                      | -0.00342943  | 0.035906024 | 0.924048302 |
| pcaac362.pcaec423                  | -0.000300858 | 0.00315013  | 0.924051963 |
| pcaac405.pcaec402                  | -0.002349582 | 0.024602147 | 0.92405475  |
| smc261.pcaec382                    | 0.001522784  | 0.015953742 | 0.924096893 |
| pcaac405.pcaac360                  | 0.002475688  | 0.025946249 | 0.924123796 |
| pcaec343.asparticacid              | 0.002647599  | 0.027815962 | 0.924308766 |
| pcaac321.h1                        | -0.000165151 | 0.001738052 | 0.924437411 |
| c51.asparagine                     | 0.000521375  | 0.005489932 | 0.924478037 |
| pcaec365.pcaac300                  | -0.004684608 | 0.049352221 | 0.924515538 |
| histidine.serotonin                | 0.004646063  | 0.049013375 | 0.924618749 |
| glutamicacid.pcaac365              | -0.005686957 | 0.059995359 | 0.924620171 |
| c14.pcaac341                       | -0.001281244 | 0.013545888 | 0.924782279 |
| pcaac323.lysopcac170               | 0.000763274  | 0.00807477  | 0.924829622 |
| smohc222.c142                      | 0.002730233  | 0.028885216 | 0.924834125 |

|                           |              |             |             |
|---------------------------|--------------|-------------|-------------|
| pcaac406.pcaec420         | 0.005344973  | 0.056603813 | 0.924907301 |
| smc202.pcaec420           | -0.002429053 | 0.02572613  | 0.924913743 |
| pcaac323.pcaac404         | -0.001225517 | 0.012991194 | 0.924981346 |
| pcaec342.pcaec421         | -0.000255411 | 0.002708127 | 0.924998491 |
| pcaac342.valine           | 0.002726119  | 0.028938181 | 0.92508402  |
| lysopcac181.smohc141      | -0.003833978 | 0.040739991 | 0.925160494 |
| pcaac240.pcaec420         | 0.002311851  | 0.024603595 | 0.925275088 |
| pcaac342.pcaec445         | -0.004203508 | 0.0447597   | 0.925315639 |
| creatinine.lysopcac140    | 8.78E-05     | 0.000935109 | 0.925337635 |
| histidine.isoleucine      | -0.001579217 | 0.016823881 | 0.925351511 |
| pcaec341.pcaec423         | 0.000442807  | 0.004728892 | 0.925532947 |
| ornithine.smc160          | -0.005143395 | 0.054994523 | 0.925622666 |
| pcaec321.lysopcac140      | -6.20E-05    | 0.000663631 | 0.925695483 |
| smc181.c2                 | -0.004619054 | 0.04943968  | 0.92569998  |
| pcaec343.h1               | 0.000281189  | 0.003009976 | 0.925707223 |
| lysine.pcaac360           | 0.001896011  | 0.020311852 | 0.925765819 |
| pcaac343.c142             | -0.001383257 | 0.014839243 | 0.925868037 |
| lysopcac204.pcaec364      | 0.001817662  | 0.019500802 | 0.925873236 |
| leucine.serine            | 0.003273285  | 0.035126411 | 0.92589203  |
| pcaec421.pcaac383         | 0.000743512  | 0.007980543 | 0.925908166 |
| pcaac401.pcaec401         | 0.007743954  | 0.083122758 | 0.925910278 |
| lysopcac280.phenylalanine | 0.003491057  | 0.037509826 | 0.925983549 |
| pcaec385.pcaec446         | -0.005751814 | 0.062070624 | 0.92630457  |
| pcaec341.pcaec422         | 0.002614822  | 0.028220514 | 0.926311602 |
| c18.pcaec365              | 0.002010992  | 0.021706194 | 0.926320144 |
| c14.pcaec363              | 0.001487139  | 0.016054358 | 0.926331655 |
| pcaec420.c12              | -0.002478194 | 0.026760482 | 0.926351472 |
| c2.lysopcac181            | 0.006281355  | 0.067868591 | 0.926394904 |
| pcaac360.valine           | -0.003793957 | 0.040993692 | 0.926396446 |
| pcaac342.pcaec401         | -0.00298666  | 0.032273716 | 0.926402956 |
| pcaac425.pcaec423         | -0.00036706  | 0.003970859 | 0.926484741 |
| pcaec420.pcaec384         | -0.00240459  | 0.026015006 | 0.926490738 |
| pcaac366.smc180           | 0.000583303  | 0.006316706 | 0.926560448 |
| h1.lysopcac203            | 0.006899841  | 0.074730392 | 0.926570903 |
| asparticacid.smc180       | 0.000353072  | 0.003826096 | 0.926610324 |
| pcaec384.c101             | -0.000966206 | 0.010478363 | 0.926666185 |
| pcaec403.lysopcac160      | -0.002978525 | 0.032304696 | 0.926673024 |
| putrescine.pcaec341       | 0.003368678  | 0.036565774 | 0.926732094 |
| pcaac385.putrescine       | -0.003025548 | 0.03284467  | 0.92673976  |
| asparticacid.prolinr      | 0.002890952  | 0.031420614 | 0.926825994 |
| citruiline.c51            | 0.002450116  | 0.026706581 | 0.927037021 |
| citruiline.pcaac424       | -0.001488997 | 0.016238298 | 0.92707302  |
| pcaac420.pcaac320         | -0.004434303 | 0.048383962 | 0.927111434 |
| pcaac405.c101             | 0.000489809  | 0.005345541 | 0.927126303 |
| smohc222.alanine          | -0.001724159 | 0.018819567 | 0.927137578 |

|                               |              |             |             |
|-------------------------------|--------------|-------------|-------------|
| lysopcac170.pcaac363          | -0.001899152 | 0.020747183 | 0.927198965 |
| pcaac446.valine               | -0.006260832 | 0.068441344 | 0.927246935 |
| pcaac342.pcaac281             | 0.000233186  | 0.002550446 | 0.92728489  |
| pcaac385.pcaac421             | 0.000109664  | 0.001200939 | 0.927375412 |
| pcaac443.lysopcac203          | 0.001172794  | 0.012871556 | 0.927534155 |
| c10.pcaac343                  | 0.005930943  | 0.065165724 | 0.927615015 |
| pcaac321.pcaac420             | 0.008585626  | 0.094361521 | 0.9276362   |
| acetylmethionine.pcaac446     | -0.00134983  | 0.014843778 | 0.927676491 |
| pcaac404.c0                   | -9.58E-05    | 0.001054412 | 0.927706631 |
| histidine.leucine             | -0.001105401 | 0.012162816 | 0.927717778 |
| smohc221.pcaac361             | -0.003197235 | 0.035231651 | 0.927824625 |
| glycine.pcaac342              | 0.004380631  | 0.048272042 | 0.927824722 |
| ornithine.c162                | -0.006151039 | 0.067791707 | 0.927836175 |
| alanine.lysopcac160           | -0.000878124 | 0.009686077 | 0.927896444 |
| c51dc.pcaac362                | 0.001932321  | 0.021321549 | 0.927920855 |
| pcaac406.pcaac422             | -0.005373323 | 0.059316223 | 0.927952475 |
| pcaac403.pcaac365             | -0.001856518 | 0.020503273 | 0.927984466 |
| c182.pcaac422                 | -0.001551907 | 0.017150954 | 0.928033816 |
| pcaac342.pcaac384             | 0.006039818  | 0.066813055 | 0.928102367 |
| pcaac401.glutamicacid         | -0.004304231 | 0.047686249 | 0.928211271 |
| smc261.c3                     | -0.00157406  | 0.017443588 | 0.928230522 |
| pcaac363.smohc241             | -0.004135651 | 0.045832797 | 0.928233504 |
| lysopcac140.asparticacid      | 0.003653024  | 0.040486041 | 0.928236846 |
| pcaac322.smc160               | -0.008212154 | 0.091093836 | 0.92829929  |
| pcaac321.pcaac361             | -0.006364233 | 0.070664308 | 0.928368767 |
| pcaac386.pcaac301             | -0.006318533 | 0.070293096 | 0.928507193 |
| lysopcac161.pcaac321          | 0.002326753  | 0.025908806 | 0.928572939 |
| c101.pcaac380                 | -0.003059906 | 0.034078101 | 0.928584466 |
| pcaac365.c8                   | -0.003382208 | 0.037678996 | 0.928606053 |
| pcaac364.pcaac365             | 0.003190945  | 0.035612538 | 0.928734579 |
| pcaac405.lysopcac181          | 0.005753836  | 0.064296333 | 0.928823729 |
| pcaac446.smc180               | 0.001382486  | 0.015466743 | 0.928906954 |
| pcaac301.c10                  | 0.002548698  | 0.028516039 | 0.928912266 |
| c162.pcaac386                 | -0.000938556 | 0.010501943 | 0.928918554 |
| acetylmethionine.pcaac301     | 0.003864687  | 0.04326025  | 0.928945553 |
| glutamine.c5                  | -0.000889905 | 0.009962423 | 0.928953179 |
| ornithine.c12                 | 0.004118409  | 0.046158156 | 0.929034311 |
| citruiline.histidine          | -0.003662569 | 0.041055682 | 0.929045468 |
| alphaaminoadipicacid.pcaac300 | 0.002631132  | 0.029506581 | 0.929076219 |
| pcaac405.c182                 | 0.002318567  | 0.026011673 | 0.929104283 |
| pcaac402.lysopcac181          | 0.0047245    | 0.053064524 | 0.929185612 |
| c101.pcaac343                 | 0.005091405  | 0.057221458 | 0.929229978 |
| pcaac365.pcaac380             | -0.007060306 | 0.079387021 | 0.929263229 |
| lysopcac281.pcaac340          | 0.005855709  | 0.065912811 | 0.929338633 |
| putrescine.pcaac340           | -0.004190704 | 0.04718655  | 0.929361485 |



|                                    |              |             |             |
|------------------------------------|--------------|-------------|-------------|
| serotonin.pcaac385                 | -0.002909402 | 0.03281801  | 0.929487454 |
| pcaec420.pcaac240                  | -0.000767987 | 0.008665163 | 0.929505958 |
| pcaec343.pcaac320                  | 0.006089364  | 0.068751104 | 0.929552081 |
| pcaac402.glutamicacid              | -0.007751567 | 0.087571867 | 0.929595327 |
| pcaec322.pcaac403                  | 0.000556602  | 0.006289125 | 0.929606665 |
| pcaac403.asymmetricdimethylarginir | -0.001814325 | 0.020505334 | 0.929623881 |
| asparticacid.pcaac401              | 0.00026738   | 0.003023423 | 0.92965919  |
| smc161.pcaec301                    | 0.004080389  | 0.046140261 | 0.929660523 |
| pcaec361.lysopcac140               | 9.28E-05     | 0.001050952 | 0.929760166 |
| pcaec405.pcaec420                  | 0.002472772  | 0.028001787 | 0.929761112 |
| lysopcac170.smc160                 | 0.003895586  | 0.04411447  | 0.929762171 |
| pcaac380.pcaec341                  | 0.002960564  | 0.033529588 | 0.929769504 |
| c14.pcaac364                       | 0.002841553  | 0.032208162 | 0.929826972 |
| methioninesulfoxide.pcaac422       | -0.016368385 | 0.18554198  | 0.929831195 |
| pcaac320.smc180                    | -0.000627547 | 0.007115005 | 0.929846104 |
| pcaac385.pcaac344                  | 0.006374239  | 0.072401657 | 0.929973477 |
| pcaec402.taurine                   | 0.004623697  | 0.052528289 | 0.929986938 |
| pcaac343.pcaec401                  | 0.005531544  | 0.062863324 | 0.930010582 |
| pcaac361.pcaec421                  | 0.000233508  | 0.002654894 | 0.93004176  |
| c10.glutamine                      | -0.002461989 | 0.028008341 | 0.930082939 |
| pcaec382.glutamicacid              | 0.008954599  | 0.101922889 | 0.93011894  |
| arginine.pcaac385                  | -0.002482184 | 0.028289625 | 0.930209965 |
| pcaac383.pcaec365                  | 0.00208634   | 0.023800247 | 0.930274581 |
| lysopcac161.taurine                | 0.002436255  | 0.027802141 | 0.930300058 |
| pcaac363.smohc141                  | 0.002783204  | 0.031787094 | 0.930356105 |
| putrescine.c12                     | 0.003107496  | 0.035506722 | 0.930387151 |
| c18.isoleucine                     | 0.00118542   | 0.013545878 | 0.930392757 |
| c18.pcaac363                       | -0.000783738 | 0.008969444 | 0.930498109 |
| smohc161.pcaac343                  | 0.001474558  | 0.016879033 | 0.930512656 |
| pcaec446.phenylalanine             | 0.003119654  | 0.035710445 | 0.930513155 |
| pcaec425.c102                      | 0.001823188  | 0.020870995 | 0.93051679  |
| glycine.smc260                     | 0.002200564  | 0.025203206 | 0.930550311 |
| c14.putrescine                     | 0.003183556  | 0.036528022 | 0.930676515 |
| pcaec445.smc160                    | 0.007057534  | 0.081043093 | 0.930732119 |
| pcaac320.c182                      | 0.00228908   | 0.026331352 | 0.930851215 |
| serine.pcaec420                    | -0.002901203 | 0.03338557  | 0.930877956 |
| pcaac321.c182                      | -0.001793363 | 0.020665787 | 0.930973646 |
| c181.c16                           | -0.005247038 | 0.060472201 | 0.930982802 |
| asparticacid.ornithine             | 0.002697611  | 0.031151807 | 0.931119359 |
| pcaec364.pcaec402                  | -0.003150522 | 0.036411095 | 0.931174274 |
| asymmetricdimethylarginine.pcaac42 | -0.003804745 | 0.044001848 | 0.931220766 |
| pcaec385.pcaac344                  | -0.004443924 | 0.051430469 | 0.931269474 |
| smc241.pcaac300                    | -0.004159014 | 0.048227081 | 0.931403023 |
| pcaec360.c16                       | -0.005223964 | 0.060610893 | 0.931442388 |
| pcaac402.transhydroxyproline       | -0.006367504 | 0.073896604 | 0.931458878 |

|                              |              |             |             |
|------------------------------|--------------|-------------|-------------|
| pcaec321.pcaec362            | 0.001949308  | 0.022632302 | 0.931489241 |
| pcaac343.methioninesulfoxide | 0.001554465  | 0.018087895 | 0.931639974 |
| pcaec405.smc161              | 0.005747528  | 0.06688371  | 0.931645022 |
| citruline.pcaec423           | 0.001452817  | 0.016909006 | 0.931655696 |
| c3.pcaec406                  | 0.00336719   | 0.039191503 | 0.931658368 |
| alanine.c10                  | 0.00035859   | 0.004174665 | 0.931673929 |
| lysopcac181.pcaec362         | 0.002266896  | 0.0264084   | 0.931718953 |
| smc181.lysopcac161           | 0.004737001  | 0.055237154 | 0.93178438  |
| pcaac364.pcaec425            | 0.00062337   | 0.007272604 | 0.931818225 |
| lysopcac180.pcaec401         | -0.003071361 | 0.035833279 | 0.931820088 |
| pcaec445.c102                | -0.001834282 | 0.021414153 | 0.931863766 |
| pcaac384.pcaac424            | 0.000838238  | 0.009793509 | 0.931916356 |
| pcaec422.pcaac425            | -0.007423689 | 0.08673507  | 0.931916989 |
| pcaec384.lysopcac160         | 0.000987432  | 0.011543963 | 0.93195961  |
| lysopcac281.pcaac425         | -0.006178924 | 0.072238885 | 0.931961264 |
| c12.pcaac323                 | 0.004936661  | 0.057742085 | 0.931992667 |
| leucine.pcaec363             | -0.002525296 | 0.0295405   | 0.93199991  |
| c12.asparticacid             | 0.003325848  | 0.038912755 | 0.932013044 |
| pcaec360.pcaec423            | -0.000322046 | 0.003771738 | 0.932080719 |
| smohc222.pcaac240            | -0.000620765 | 0.007271374 | 0.932091051 |
| pcaac281.threonine           | 0.003096012  | 0.036305395 | 0.932165751 |
| pcaec360.pcaec380            | -0.004468525 | 0.052422126 | 0.932194081 |
| serotonin.pcaec406           | -0.001504964 | 0.017658257 | 0.932205163 |
| glycine.arginine             | 0.001730014  | 0.020311184 | 0.932246253 |
| smc241.pcaac401              | -0.000326281 | 0.003832894 | 0.932285079 |
| smohc141.tyrosine            | -0.004647896 | 0.054711642 | 0.932423097 |
| pcaac381.smc240              | 0.003874202  | 0.045628683 | 0.932459145 |
| c141.c141oh                  | 0.011444615  | 0.134836834 | 0.932482681 |
| pcaec382.pcaec446            | -0.004821948 | 0.05685204  | 0.932531689 |
| lysopcac181.pcaac322         | -0.00657933  | 0.077583    | 0.932541204 |
| methionine.smc181            | -0.000751904 | 0.008867742 | 0.932551433 |
| lysopcac170.c12              | 0.003598435  | 0.042478533 | 0.932614142 |
| pcaec361.pcaac240            | 0.001015648  | 0.012006905 | 0.932711874 |
| pcaac422.pcaac363            | 0.001645488  | 0.019476092 | 0.932792095 |
| pcaac363.c142                | -0.002200919 | 0.026067609 | 0.932836866 |
| c142.acetylnithoine          | -0.001867218 | 0.022119196 | 0.93284876  |
| pcaac406.asparticacid        | 0.002952956  | 0.034994041 | 0.932873881 |
| pcaec402.lysopcac281         | -0.001736214 | 0.020585971 | 0.932909485 |
| pcaac422.threonine           | -0.001957911 | 0.023219737 | 0.932924336 |
| c10.pcaec403                 | -0.001814185 | 0.021551073 | 0.933035634 |
| pcaec384.threonine           | -0.00288642  | 0.03432778  | 0.933112315 |
| pcaac401.pcaec423            | 0.005630828  | 0.06703359  | 0.93317897  |
| pcaac422.putrescine          | -0.002913456 | 0.03469161  | 0.933193668 |
| pcaec343.lysopcac180         | 0.00511992   | 0.060976243 | 0.933206177 |
| pcaac381.pcaec421            | -0.000159607 | 0.001901257 | 0.933220231 |

|                                   |              |             |             |
|-----------------------------------|--------------|-------------|-------------|
| pcaec364.c182                     | 0.002148168  | 0.025591102 | 0.933225079 |
| pcaac401.smc240                   | 0.003844151  | 0.045869358 | 0.933332611 |
| smc240.c4                         | -0.00098873  | 0.011823968 | 0.933479961 |
| c181.methionine                   | -0.001793739 | 0.021451079 | 0.933480633 |
| methionine.pcaec446               | -0.006600229 | 0.078934385 | 0.933483279 |
| methionine.valine                 | 0.003472193  | 0.041533172 | 0.933496117 |
| c51.smohc141                      | -0.00066209  | 0.007921181 | 0.933508591 |
| pcaec403.c3                       | -0.003399252 | 0.040699798 | 0.933559904 |
| c10.smc181                        | 0.001795316  | 0.021499362 | 0.933571449 |
| spermidine.arginine               | 0.004474012  | 0.053604704 | 0.933605191 |
| smohc141.smc160                   | 0.010580728  | 0.126934802 | 0.933690454 |
| c141.lysopcac182                  | -0.001779741 | 0.021363448 | 0.933728415 |
| smohc141.asymmetricdimethylargin: | 0.001633788  | 0.019622232 | 0.933764689 |
| pcaec384.pcaec365                 | -0.00181197  | 0.021775392 | 0.933804558 |
| lysopcac280.pcaac322              | 0.003077379  | 0.036996527 | 0.93382965  |
| lysine.c10                        | 0.000238676  | 0.002869472 | 0.933831698 |
| pcaac401.phenylalanine            | -0.003737215 | 0.044964868 | 0.933882124 |
| c8.pcaec403                       | -0.001896919 | 0.02283289  | 0.933910482 |
| pcaec360.lysopcac161              | -0.005703274 | 0.068691117 | 0.933950606 |
| c3.pcaec385                       | -0.003043391 | 0.036664465 | 0.933967488 |
| pcaec406.pcaac401                 | 0.00045258   | 0.005456577 | 0.934018616 |
| ornithine.lysopcac182             | -0.000950217 | 0.011457162 | 0.934023118 |
| pcaac366.pcaec405                 | -0.003757575 | 0.045319397 | 0.934041593 |
| pcaac421.pcaec343                 | 0.006446931  | 0.077761652 | 0.934047056 |
| pcaac363.pcaac385                 | -0.004911542 | 0.059243369 | 0.934048482 |
| pcaac383.pcaec425                 | -0.001520763 | 0.018343724 | 0.934049114 |
| pcaec404.pcaac402                 | -0.00968056  | 0.11681477  | 0.934075054 |
| glycine.alphaaminoadipicacid      | 0.001956067  | 0.023608308 | 0.934087758 |
| pcaec422.pcaec384                 | -0.002495614 | 0.030124342 | 0.9340967   |
| pcaac425.pcaac383                 | -0.000375816 | 0.004552812 | 0.934333111 |
| pcaac342.taurine                  | 0.001873457  | 0.022700535 | 0.934346361 |
| h1.pcaec301                       | -0.006039671 | 0.073210934 | 0.934372037 |
| histidine.pcaac240                | 0.000948983  | 0.011505668 | 0.934385686 |
| c162.pcaac383                     | -0.000422134 | 0.005121149 | 0.9344254   |
| lysopcac161.valine                | -0.004382219 | 0.053165019 | 0.934427684 |
| pcaac406.c8                       | 0.003462988  | 0.042024632 | 0.934445915 |
| acetylorithoine.smc260            | 0.002445351  | 0.029675396 | 0.934446285 |
| alphaaminoadipicacid.pcaac420     | 0.004135167  | 0.050239873 | 0.934521555 |
| pcaac323.leucine                  | -0.000641463 | 0.007795643 | 0.934540309 |
| pcaec381.smc240                   | 0.005591925  | 0.068141588 | 0.934716137 |
| isoleucine.methionine             | -0.00262842  | 0.032100596 | 0.934861071 |
| h1.pcaac322                       | -0.004725294 | 0.057712013 | 0.934863922 |
| c3.tyrosine                       | 0.003336037  | 0.040833696 | 0.935005998 |
| c162.c142                         | -0.005271726 | 0.064567265 | 0.935046551 |
| c162.putrescine                   | 0.001059338  | 0.012982608 | 0.93508649  |

|                                   |              |             |             |
|-----------------------------------|--------------|-------------|-------------|
| pcaac366.pcaac344                 | -0.004915339 | 0.060257914 | 0.935106382 |
| pcaac405.c51                      | -0.001949535 | 0.023902688 | 0.935114585 |
| pcaec423.tyrosine                 | -0.003831348 | 0.046977071 | 0.935117368 |
| c18.smc260                        | -0.001670787 | 0.020493502 | 0.935141315 |
| pcaec402.pcaec423                 | 0.001787093  | 0.021923274 | 0.935150744 |
| pcaec404.pcaac425                 | 0.007337282  | 0.090146743 | 0.935248488 |
| c8.pcaec340                       | -0.002850874 | 0.035067483 | 0.935324568 |
| pcaec444.pcaec361                 | -0.000788331 | 0.009703905 | 0.935370843 |
| c102.pcaec420                     | 0.000945057  | 0.011635407 | 0.935383534 |
| c16.pcaec322                      | 0.003828565  | 0.047147731 | 0.935398548 |
| asparagine.c10                    | 0.00017603   | 0.002169385 | 0.935446884 |
| pcaac424.asparagine               | -0.001208975 | 0.014904359 | 0.935468448 |
| c51.pcaac362                      | 0.00060907   | 0.007518086 | 0.935549032 |
| pcaac420.c4                       | -0.000888352 | 0.010978399 | 0.935625093 |
| smc180.pcaec360                   | 0.000848439  | 0.010488791 | 0.935647399 |
| methioninesulfoxide.alanine       | -0.002222968 | 0.027592128 | 0.93590523  |
| glycine.spermidine                | 0.004324163  | 0.05370149  | 0.935939433 |
| pcaec443.alanine                  | -0.001158998 | 0.014460144 | 0.936233957 |
| smohc221.asparticacid             | 0.001922309  | 0.024029503 | 0.936355696 |
| alphaaminoadipicacid.pcaac405     | -0.003573461 | 0.044678426 | 0.93636844  |
| pcaec361.c3                       | -0.002377257 | 0.02973558  | 0.936396429 |
| pcaec404.pcaec420                 | 0.001843147  | 0.023137088 | 0.936622335 |
| pcaec382.pcaec421                 | -0.00036418  | 0.004572389 | 0.936633708 |
| pcaac361.pcaec362                 | -0.002510785 | 0.031551732 | 0.936689978 |
| pcaec360.isoleucine               | -0.001075625 | 0.013522895 | 0.936718367 |
| pcaec300.pcaec386                 | -0.000525849 | 0.006614379 | 0.93675022  |
| pcaac363.glutamicacid             | 0.002958013  | 0.037211719 | 0.936757747 |
| pcaec384.pcaac383                 | 0.000284008  | 0.003574796 | 0.936792773 |
| pcaac401.c182                     | 0.002542681  | 0.032032251 | 0.936847168 |
| pcaec385.pcaec423                 | 0.000692763  | 0.00873136  | 0.936876461 |
| pcaec341.pcaec365                 | -0.00123423  | 0.015578316 | 0.936967309 |
| isoleucine.smc161                 | -0.00282449  | 0.03565152  | 0.93696929  |
| isoleucine.asparticacid           | 0.00129111   | 0.016297498 | 0.936972143 |
| pcaec404.pcaac420                 | -0.006098388 | 0.076992212 | 0.936982871 |
| pcaac320.pcaac383                 | -0.000326003 | 0.004116025 | 0.93698645  |
| smc181.pcaec402                   | -0.002674786 | 0.033784026 | 0.937010468 |
| methionine.lysine                 | 0.004804928  | 0.060695652 | 0.937017468 |
| smohc222.asymmetricdimethylargin: | -0.001591067 | 0.02010154  | 0.9370276   |
| lysopcac140.smc202                | 0.002266003  | 0.028662808 | 0.937102444 |
| pcaec444.c12                      | -0.002922147 | 0.037002862 | 0.937171042 |
| lysine.c4                         | 0.000514183  | 0.006523327 | 0.9372891   |
| arginine.pcaac323                 | -0.008433506 | 0.107314674 | 0.937476034 |
| acetylorithoine.kynurenine        | -0.001636332 | 0.02082249  | 0.937477499 |
| pcaac404.methioninesulfoxide      | -0.002043827 | 0.026070275 | 0.937626788 |
| lysopcac160.pcaac420              | 0.005444729  | 0.069470135 | 0.937644031 |

|                                    |              |             |             |
|------------------------------------|--------------|-------------|-------------|
| pcaac420.c142                      | 0.003587447  | 0.0457749   | 0.937646896 |
| pcaac361.pcaec301                  | -0.005177199 | 0.066091742 | 0.937677042 |
| creatinine.methioninesulfoxide     | -0.002157259 | 0.027542832 | 0.937684781 |
| glycine.lysopcac161                | -0.002449028 | 0.031268287 | 0.937685355 |
| pcaec382.pcaec423                  | 0.001635773  | 0.020889981 | 0.937700328 |
| pcaec362.lysine                    | -0.003210117 | 0.041003605 | 0.937712664 |
| leucine.pcaec343                   | 0.004789302  | 0.061225638 | 0.93776417  |
| alanine.smc160                     | 0.004767887  | 0.060974535 | 0.93778725  |
| lysopcac170.pcaec362               | -0.001680591 | 0.021503186 | 0.937818424 |
| lysopcac203.c5                     | 0.001349226  | 0.017270092 | 0.937842609 |
| pcaac362.pcaac343                  | 0.002074589  | 0.02658008  | 0.937901752 |
| smc180.pcaac426                    | 0.002198593  | 0.028172437 | 0.937909662 |
| lysopcac204.serine                 | -0.005750012 | 0.073691083 | 0.937919155 |
| pcaac425.smc180                    | 0.000443492  | 0.005701099 | 0.938108125 |
| pcaac321.pcaac424                  | 0.000467995  | 0.00601739  | 0.938121528 |
| leucine.pcaac420                   | -0.003244998 | 0.041746295 | 0.938155125 |
| lysopcac160.pcaec365               | 0.001516553  | 0.019521177 | 0.938189916 |
| methionine.isoleucine              | 0.000857782  | 0.011047214 | 0.938222232 |
| pcaec380.pcaec423                  | -0.000902065 | 0.0116258   | 0.93826607  |
| prolinr.asparagine                 | -0.00141042  | 0.01818739  | 0.938299672 |
| pcaac360.h1                        | 0.000143258  | 0.001847943 | 0.938320509 |
| pcaac405.pcaac401                  | 0.000200035  | 0.002581351 | 0.938344971 |
| pcaac424.pcaac383                  | -0.000429196 | 0.005541349 | 0.938375888 |
| pcaac321.c3                        | 0.001337683  | 0.017273835 | 0.938386653 |
| lysopcac204.pcaac322               | 0.004334135  | 0.056090425 | 0.938521103 |
| pcaac240.lysopcac170               | -0.002316885 | 0.029998827 | 0.938551265 |
| pcaec404.c2                        | 0.005679843  | 0.073591777 | 0.938592631 |
| smc240.isoleucine                  | -0.001263873 | 0.016381648 | 0.9386154   |
| pcaac404.pcaac361                  | 0.005263678  | 0.068229106 | 0.938619072 |
| pcaac380.pcaac425                  | -0.006583959 | 0.085367392 | 0.938636639 |
| pcaec402.c102                      | 0.002074184  | 0.026901559 | 0.938654297 |
| pcaac384.serotonin                 | -0.004664563 | 0.060570955 | 0.93872802  |
| c141oh.creatinine                  | -0.001396883 | 0.018142067 | 0.938738356 |
| asymmetricdimethylarginine.pcaac36 | -0.00382055  | 0.049633166 | 0.938755146 |
| lysopcac140.smc260                 | -0.001701037 | 0.022107636 | 0.938780822 |
| asymmetricdimethylarginine.pcaec36 | 0.001612225  | 0.020973037 | 0.93883808  |
| pcaac425.c182                      | 0.002178495  | 0.028340387 | 0.938839976 |
| smc160.ornithine                   | -0.001506274 | 0.019611409 | 0.938889927 |
| pcaac366.alanine                   | -0.000954168 | 0.01244271  | 0.938986068 |
| pcaec300.pcaec340                  | -0.008447913 | 0.110382702 | 0.939106762 |
| lysopcac203.c2                     | 0.005265496  | 0.068892588 | 0.939188091 |
| c0.c10                             | -0.002384682 | 0.03120165  | 0.939190046 |
| h1.pcaec322                        | 0.002336105  | 0.030569998 | 0.939197855 |
| pcaac422.ornithine                 | 0.001696516  | 0.022216202 | 0.939240971 |
| arginine.acetylorithoine           | 0.003037572  | 0.039874602 | 0.939388526 |

|                               |              |             |             |
|-------------------------------|--------------|-------------|-------------|
| pcaec383.smohc141             | -0.00151434  | 0.019879653 | 0.939390696 |
| serine.smc180                 | -0.000584736 | 0.007680041 | 0.939421103 |
| pcaac425.methioninesulfoxide  | -0.002173492 | 0.028550934 | 0.939429266 |
| pcaac344.threonine            | 0.001893142  | 0.024871181 | 0.93943636  |
| pcaac360.tyrosine             | 0.00351177   | 0.04620344  | 0.939524669 |
| pcaec445.pcaac405             | -0.004896128 | 0.064491411 | 0.939594239 |
| c16.glutamine                 | -0.001424793 | 0.018777266 | 0.939626347 |
| pcaec300.c14                  | -0.002171323 | 0.028615882 | 0.939626666 |
| lysopcac203.pcaac363          | -0.000774832 | 0.010212275 | 0.93963114  |
| isoleucine.smc260             | 0.000979609  | 0.012927548 | 0.93970715  |
| pcaec386.c3                   | 0.001473714  | 0.01945015  | 0.93971359  |
| pcaac361.pcaac300             | -0.006272465 | 0.082802303 | 0.939726672 |
| pcaac384.c51                  | -0.001570091 | 0.020735827 | 0.939753316 |
| pcaec300.c10                  | 0.000132115  | 0.001745925 | 0.939791531 |
| c0.asparagine                 | 0.000868213  | 0.011484205 | 0.939847139 |
| c2.c142                       | -0.003895495 | 0.051552104 | 0.939876022 |
| c3.lysopcac140                | -0.000143959 | 0.001905778 | 0.939896924 |
| c101.lysopcac170              | 0.001456444  | 0.019281471 | 0.939898496 |
| c101.c14                      | -0.002250756 | 0.029798159 | 0.939900517 |
| pcaec402.c142                 | 0.002391608  | 0.031664268 | 0.939903071 |
| c101.pcaac364                 | -0.00243955  | 0.03232064  | 0.939943215 |
| pcaec406.pcaac320             | 0.006789673  | 0.089985399 | 0.939964319 |
| pcaac344.pcaec342             | 0.00649084   | 0.08606134  | 0.9399897   |
| alphaaminoadipicacid.pcaec384 | 0.002118591  | 0.028131506 | 0.940077725 |
| lysopcac161.pcaec301          | 0.002792345  | 0.037105986 | 0.940123009 |
| pcaec300.pcaac361             | 0.005826966  | 0.077443508 | 0.940132323 |
| pcaac381.kynurenine           | 0.000674499  | 0.00897874  | 0.940227371 |
| arginine.pcaec363             | 0.001572163  | 0.020933148 | 0.94024152  |
| h1.c51dc                      | -0.010794408 | 0.143739846 | 0.940247212 |
| pcaac383.pcaec423             | 0.000319616  | 0.004256723 | 0.940256591 |
| pcaac365.h1                   | 0.00012235   | 0.001630589 | 0.940297022 |
| arginine.pcaec386             | 0.000596649  | 0.007953991 | 0.940314119 |
| alanine.pcaac363              | -0.001116106 | 0.014901424 | 0.940404083 |
| lysopcac140.pcaec365          | 0.001616487  | 0.021595671 | 0.940441373 |
| pcaec340.pcaec365             | -0.001172048 | 0.015667188 | 0.940475759 |
| pcaec405.pcaec361             | 0.001185564  | 0.015860648 | 0.940523659 |
| pcaec422.pcaec402             | -0.002253566 | 0.030168493 | 0.940562898 |
| pcaec444.c182                 | 0.00255165   | 0.034180182 | 0.940599777 |
| pcaac424.pcaec422             | -0.009015655 | 0.120825979 | 0.940628402 |
| pcaec445.pcaec401             | 0.002246855  | 0.03013544  | 0.940674699 |
| pcaec403.c142                 | 0.002376884  | 0.031897974 | 0.940709128 |
| pcaac281.lysopcac140          | -5.01E-05    | 0.000671978 | 0.940720739 |
| leucine.glycine               | -0.00253987  | 0.034114587 | 0.940760008 |
| smc240.serotonin              | 0.004418502  | 0.05948144  | 0.940892991 |
| pcaac421.c8                   | 0.002574089  | 0.034707017 | 0.940986289 |

|                                     |              |             |             |
|-------------------------------------|--------------|-------------|-------------|
| smohc241.pcaec361                   | -0.000588421 | 0.007938389 | 0.941020275 |
| ornithine.c101                      | -0.000697889 | 0.009416126 | 0.941025868 |
| pcaac383.smc202                     | -0.002109249 | 0.028486224 | 0.941082966 |
| lysine.pcaec382                     | 0.001021967  | 0.013805399 | 0.941097154 |
| arginine.asymmetricdimethylarginine | 0.001482397  | 0.020031428 | 0.941115476 |
| pcaec301.serotonin                  | -0.003474913 | 0.047015151 | 0.941189405 |
| lysopcac204.h1                      | 0.000159923  | 0.002166296 | 0.941258779 |
| c8.pcaac385                         | -0.001548364 | 0.020988782 | 0.941300177 |
| pcaac363.pcaec365                   | -0.001707641 | 0.023150665 | 0.941307307 |
| pcaac361.smohc141                   | -0.001134116 | 0.015376707 | 0.941312573 |
| pcaac320.c102                       | 0.002311895  | 0.031356824 | 0.941333872 |
| pcaac403.lysopcac204                | 0.00440341   | 0.059796537 | 0.941404348 |
| c101.lysopcac180                    | 0.003363168  | 0.045716429 | 0.941463144 |
| smc241.c3                           | -0.000983674 | 0.013375705 | 0.941482225 |
| smc240.valine                       | -0.001667032 | 0.022683151 | 0.941521736 |
| pcaec362.lysopcac180                | 0.005123514  | 0.069722507 | 0.941527866 |
| pcaec322.lysopcac203                | 0.001191375  | 0.016217104 | 0.941543943 |
| smohc222.pcaec363                   | -0.002582333 | 0.035158438 | 0.941556376 |
| glutamine.c4                        | 0.000579896  | 0.007901117 | 0.941599526 |
| asymmetricdimethylarginine.c16      | -0.001579354 | 0.021530743 | 0.941631842 |
| pcaec423.pcaec300                   | 0.002178278  | 0.029716711 | 0.941673162 |
| pcaec364.pcaec281                   | 0.000110274  | 0.001504625 | 0.941682107 |
| leucine.isoleucine                  | 0.003292249  | 0.0449452   | 0.941713784 |
| lysine.c141                         | 0.001543363  | 0.021078477 | 0.941737972 |
| pcaec424.pcaec363                   | 0.000903514  | 0.012343452 | 0.941755426 |
| pcaac421.pcaec423                   | 0.004531349  | 0.061925886 | 0.94177458  |
| pcaec386.isoleucine                 | 0.002700154  | 0.036912587 | 0.941793484 |
| c0.pcaec342                         | -0.002749694 | 0.037609431 | 0.941823772 |
| pcaec342.pcaac424                   | -0.000705699 | 0.009655716 | 0.941844193 |
| pcaac320.c18                        | 0.001831951  | 0.025068579 | 0.941850965 |
| pcaec381.c142                       | -0.002181897 | 0.029876324 | 0.941887988 |
| c141oh.lysopcac161                  | 0.004897481  | 0.067144718 | 0.941960898 |
| lysopcac170.threonine               | 0.002174784  | 0.029892448 | 0.94210828  |
| pcaec343.threonine                  | -0.003623976 | 0.049901174 | 0.942211987 |
| pcaac342.c4                         | -0.000771821 | 0.010629825 | 0.942223156 |
| pcaec386.pcaec423                   | -0.000198836 | 0.00273897  | 0.94223402  |
| smc161.lysopcac203                  | -0.000849113 | 0.011702471 | 0.942263314 |
| pcaac361.smohc161                   | 0.000865069  | 0.0119274   | 0.942287625 |
| c4.threonine                        | 0.002220343  | 0.030629004 | 0.942316483 |
| pcaac366.pcaec385                   | 0.002965736  | 0.040921334 | 0.942330329 |
| pcaec401.pcaec386                   | -0.000947562 | 0.013074888 | 0.942332085 |
| pcaac404.c51                        | -0.001897384 | 0.02618884  | 0.942349393 |
| c142.c10                            | -0.000714879 | 0.00986878  | 0.942358671 |
| pcaac362.phenylalanine              | -0.002581628 | 0.035722974 | 0.942494023 |
| pcaec342.pcaec362                   | 0.001244079  | 0.017221145 | 0.942515194 |

|                                    |              |             |             |
|------------------------------------|--------------|-------------|-------------|
| pcaec384.pcaec425                  | -0.000448002 | 0.006204997 | 0.942547936 |
| pcaac386.pcaac422                  | 0.002499247  | 0.034632237 | 0.942575576 |
| pcaac384.tyrosine                  | -0.003866798 | 0.053608141 | 0.942603017 |
| lysopcac160.pcaec446               | -0.003615497 | 0.050164639 | 0.942649226 |
| pcaec385.c162                      | -0.005275761 | 0.073235164 | 0.942676228 |
| pcaec405.serotonin                 | 0.006584983  | 0.091441003 | 0.942696225 |
| c18.pcaac342                       | 0.000923014  | 0.012817607 | 0.942697856 |
| alanine.pcaec423                   | -0.000305138 | 0.00423788  | 0.942704936 |
| pcaac342.pcaec420                  | 0.001181476  | 0.016439818 | 0.942812763 |
| c141.c18                           | -0.001702545 | 0.023712384 | 0.942865928 |
| glycine.smohc141                   | 0.001155603  | 0.016103496 | 0.942896758 |
| pcaac406.lysopcac281               | 0.00072922   | 0.01016899  | 0.942937131 |
| pcaac405.c10                       | 0.000290361  | 0.004049218 | 0.942938851 |
| pcaac323.tyrosine                  | 0.002757403  | 0.038456139 | 0.94294321  |
| pcaec365.pcaac281                  | -8.65E-05    | 0.001206785 | 0.942989809 |
| pcaac240.lysine                    | -0.004636637 | 0.064859095 | 0.943113747 |
| lysopcac182.pcaac363               | 0.000647405  | 0.009064497 | 0.943166053 |
| pcaac425.spermidine                | 0.00382505   | 0.053578737 | 0.94319053  |
| pcaec405.smc180                    | 0.000372349  | 0.005220462 | 0.943243131 |
| c4.pcaac383                        | -0.000138378 | 0.001940464 | 0.943253737 |
| pcaac381.pcaac401                  | 0.000344435  | 0.004839336 | 0.943362986 |
| c4.pcaec425                        | 0.000418001  | 0.005883123 | 0.943460846 |
| serine.pcaac320                    | -0.001535811 | 0.021625784 | 0.943487309 |
| lysopcac170.c3                     | -0.001258951 | 0.017745095 | 0.943543852 |
| pcaac425.asparticacid              | -0.003436451 | 0.048440077 | 0.943547127 |
| pcaac385.smohc161                  | -0.001018514 | 0.014362108 | 0.943567428 |
| pcaac240.pcaec361                  | 0.000873492  | 0.01232797  | 0.943616912 |
| pcaac406.smc180                    | 0.001003566  | 0.014165896 | 0.943625358 |
| pcaac300.pcaec361                  | -0.000629473 | 0.008888449 | 0.943644885 |
| c5.c51                             | -0.002881976 | 0.04069954  | 0.943651416 |
| pcaec342.lysopcac170               | -0.0004711   | 0.006659132 | 0.943703874 |
| smc261.pcaec380                    | -0.002627405 | 0.037185786 | 0.943774444 |
| pcaec424.prolinr                   | -0.001245354 | 0.017630692 | 0.943790786 |
| pcaec446.lysine                    | 0.004894419  | 0.069311232 | 0.94380707  |
| pcaac320.methionine                | -0.0019857   | 0.028131946 | 0.943830792 |
| c162.pcaac401                      | -0.000144087 | 0.002042342 | 0.943858992 |
| pcaac240.smc180                    | 0.000258981  | 0.003672175 | 0.943878492 |
| smohc221.pcaac406                  | -0.002357434 | 0.03343639  | 0.943894512 |
| glutamicacid.asymmetricdimethylarg | 0.001193889  | 0.016935221 | 0.94390059  |
| smc241.pcaec365                    | 0.002466879  | 0.035013855 | 0.943934765 |
| pcaec383.pcaac404                  | -0.000672051 | 0.009554533 | 0.944026835 |
| c5.pcaec381                        | -0.005420036 | 0.077069368 | 0.944036165 |
| asparagine.pcaec384                | -0.00177043  | 0.025192605 | 0.944076624 |
| pcaac385.pcaac361                  | 0.003788572  | 0.053933541 | 0.944100935 |
| methioninesulfoxide.pcaac404       | -0.000502291 | 0.00716311  | 0.944198927 |



|                               |              |             |             |
|-------------------------------|--------------|-------------|-------------|
| leucine.methionine            | 0.002217341  | 0.03162425  | 0.944204198 |
| smc161.taurine                | -0.001733259 | 0.024740006 | 0.944248884 |
| pcaac406.lysine               | -0.005359097 | 0.07653165  | 0.944276202 |
| h1.lysopcac280                | 0.000338201  | 0.004832298 | 0.944305645 |
| pcaac402.lysopcac182          | 0.004467043  | 0.063923206 | 0.944389956 |
| citruiline.smc202             | 0.002479952  | 0.03549623  | 0.944402801 |
| pcaec423.pcaec403             | -0.002604447 | 0.037300875 | 0.944436613 |
| asparagine.pcaac365           | 0.00353209   | 0.050597028 | 0.944448079 |
| asparticacid.pcaec403         | 0.002762995  | 0.039600272 | 0.944476771 |
| pcaec421.c12                  | 0.003712938  | 0.053270415 | 0.944534217 |
| smc261.transhydroxyproline    | -0.001647968 | 0.023646646 | 0.944540901 |
| pcaec321.pcaec423             | 0.000409378  | 0.005883637 | 0.944630219 |
| smc181.pcaec425               | -0.001701504 | 0.024458726 | 0.944640263 |
| pcaec405.smc160               | -0.002142038 | 0.03082724  | 0.944704715 |
| smc261.glutamine              | 0.000752848  | 0.010837251 | 0.944717949 |
| smc240.threonine              | 0.001440903  | 0.020741893 | 0.944718213 |
| kynurenine.pcaac424           | -0.000511078 | 0.007357366 | 0.944720902 |
| smc161.c2                     | 0.003150963  | 0.04537506  | 0.944738562 |
| putrescine.lysopcac161        | -0.002244741 | 0.03232745  | 0.944742551 |
| c8.lysopcac161                | 0.004231075  | 0.060949922 | 0.94475743  |
| pcaec383.asparticacid         | 0.002625481  | 0.037826882 | 0.944766217 |
| lysopcac280.putrescine        | 0.002096066  | 0.030203166 | 0.944773307 |
| c101.smc160                   | -0.003215092 | 0.04633609  | 0.944783269 |
| pcaec421.pcaec420             | -0.00149865  | 0.021607369 | 0.94480558  |
| lysopcac170.smc260            | 0.002062054  | 0.029740064 | 0.94482335  |
| pcaac421.kynurenine           | 0.000746804  | 0.010786488 | 0.944903423 |
| c102.pcaec422                 | 0.002015544  | 0.029113991 | 0.944907957 |
| pcaac300.pcaec365             | 0.001670527  | 0.024134471 | 0.944917459 |
| smc160.pcaac426               | -0.002764576 | 0.039967787 | 0.944955068 |
| c2.putrescine                 | -0.002180553 | 0.031555222 | 0.945008591 |
| pcaac384.asparagine           | -0.001090861 | 0.01578935  | 0.945019966 |
| pcaac401.pcaec422             | -0.002189856 | 0.031702126 | 0.945029855 |
| prolinr.pcaec341              | -0.001864474 | 0.027007471 | 0.945062043 |
| pcaac406.pcaec380             | 0.002909654  | 0.042211752 | 0.945145881 |
| asparticacid.pcaec384         | -0.001868377 | 0.027107176 | 0.945149383 |
| pcaac320.c14                  | -0.002679348 | 0.038881637 | 0.945161451 |
| pcaac320.acetylorlnoithoie    | 0.002643388  | 0.038427767 | 0.945258276 |
| pcaec405.prolinr              | -0.001447142 | 0.021045299 | 0.945278395 |
| smc181.isoleucine             | 0.001149462  | 0.016721132 | 0.945294381 |
| c51.c51dc                     | 0.005488071  | 0.080038543 | 0.945433582 |
| pcaac401.pcaac344             | 0.003956622  | 0.057788523 | 0.945513507 |
| leucine.pcaac360              | 0.001282818  | 0.018736299 | 0.94551371  |
| pcaec360.prolinr              | -0.002066772 | 0.030199147 | 0.945536684 |
| kynurenine.pcaec386           | 0.000298561  | 0.004365265 | 0.945571081 |
| ornithine.methioninesulfoxide | -0.001200273 | 0.017577612 | 0.945658972 |

|                                    |              |             |             |
|------------------------------------|--------------|-------------|-------------|
| pcaec384.pcaac360                  | -0.002293455 | 0.033594715 | 0.945671584 |
| citruline.pcaec363                 | -0.001525339 | 0.022346436 | 0.945679209 |
| pcaec362.pcaac364                  | -0.002495726 | 0.03657243  | 0.945693584 |
| smohc221.valine                    | -0.002020151 | 0.029605682 | 0.945697868 |
| lysopcac204.pcaac425               | -0.003971389 | 0.058283608 | 0.9457743   |
| lysopcac180.c101                   | 0.000489455  | 0.007184936 | 0.945787495 |
| lysopcac281.pcaec420               | 0.001463546  | 0.02150044  | 0.945828746 |
| pcaec362.smc202                    | -0.003749612 | 0.055085208 | 0.945829711 |
| pcaec404.pcaac342                  | -0.002644114 | 0.038882585 | 0.945882779 |
| putrescine.pcaac320                | -0.001011347 | 0.014878705 | 0.9459064   |
| pcaac360.lysopcac182               | -0.000790245 | 0.011655276 | 0.946042501 |
| pcaac323.pcaec424                  | -0.001583352 | 0.023356148 | 0.946050313 |
| pcaec423.c102                      | -0.001622672 | 0.023971154 | 0.946128956 |
| glutamine.lysopcac140              | 9.82E-05     | 0.0014512   | 0.946149925 |
| pcaac402.pcaec341                  | -0.002010501 | 0.029718734 | 0.946162115 |
| pcaec386.smc181                    | -0.001508689 | 0.0223015   | 0.946163157 |
| acetylmithoine.valine              | -0.000535755 | 0.00792754  | 0.946217276 |
| arginine.lysopcac204               | -0.002618614 | 0.038770007 | 0.946248483 |
| c0.pcaec425                        | 0.000416604  | 0.006175898 | 0.946316722 |
| pcaec446.methioninesulfoxide       | 0.000876836  | 0.013012641 | 0.94637472  |
| c0.pcaac320                        | 0.002838035  | 0.042129709 | 0.946389965 |
| asymmetricdimethylarginine.pcaac38 | -0.000264687 | 0.003930179 | 0.946403426 |
| pcaac323.alanine                   | -0.00091317  | 0.013564682 | 0.946425334 |
| glutamicacid.pcaac401              | 0.000321003  | 0.004768544 | 0.946427727 |
| pcaac322.pcaac385                  | -0.00098367  | 0.014613347 | 0.94643058  |
| smc161.threonine                   | 0.001429853  | 0.021244929 | 0.946438406 |
| pcaec342.pcaec365                  | -0.0013618   | 0.020243055 | 0.946462883 |
| pcaac366.spermidine                | 0.003622902  | 0.053884698 | 0.946493178 |
| c51dc.pcaec386                     | -0.001170268 | 0.017423611 | 0.946547751 |
| c141oh.pcaac401                    | -0.000159696 | 0.002378041 | 0.946556804 |
| pcaac401.pcaac420                  | -0.008934874 | 0.13307652  | 0.946567438 |
| c4.pcaac426                        | -0.002697868 | 0.040202775 | 0.946594749 |
| c14.smc240                         | -0.001279512 | 0.019070193 | 0.946604007 |
| pcaac421.c4                        | 0.000780005  | 0.011626367 | 0.946608396 |
| c142.pcaac401                      | -0.000136018 | 0.002028683 | 0.946641821 |
| pcaec361.alanine                   | -0.00082414  | 0.01230022  | 0.946677725 |
| asparticacid.smc241                | 0.001142575  | 0.017058855 | 0.946696529 |
| c10.c14                            | -0.003790188 | 0.05660339  | 0.946710816 |
| c8.glutamine                       | 0.001321217  | 0.019751498 | 0.946765194 |
| pcaec363.smc240                    | -0.0013706   | 0.020512162 | 0.946823308 |
| smohc221.c8                        | -0.002254855 | 0.033804768 | 0.946915958 |
| h1.smohc141                        | -0.00156751  | 0.023529782 | 0.946982833 |
| c102.pcaec383                      | -0.003649972 | 0.054790468 | 0.946983801 |
| smohc222.pcaac380                  | 0.00293651   | 0.04411847  | 0.947029301 |
| pcaec422.pcaec321                  | -0.002720525 | 0.040919644 | 0.947088957 |

|                                    |              |             |             |
|------------------------------------|--------------|-------------|-------------|
| c10.pcaac401                       | -0.00016869  | 0.002539157 | 0.94712811  |
| c51.pcaac401                       | -0.000134825 | 0.002033158 | 0.947225189 |
| pcaac344.asymmetricdimethylarginir | -0.000803907 | 0.012139178 | 0.94729593  |
| smc260.pcaec401                    | -0.001873808 | 0.028301669 | 0.947308447 |
| c141.pcaec361                      | 0.000537768  | 0.008139486 | 0.947419214 |
| putrescine.pcaac240                | -0.001000174 | 0.015172974 | 0.94753912  |
| pcaac240.methioninesulfoxide       | -0.000987098 | 0.014975509 | 0.947542252 |
| lysine.c18                         | -0.003022478 | 0.045871201 | 0.947561025 |
| asymmetricdimethylarginine.smohc2  | 0.004003898  | 0.060944235 | 0.947714246 |
| glycine.acetylnithoine             | 0.00252615   | 0.038476521 | 0.947748755 |
| smc161.pcaec402                    | -0.001874534 | 0.028559775 | 0.947763727 |
| c12.c4                             | 0.000632704  | 0.009642138 | 0.9477771   |
| lysopcac180.c162                   | 0.004242279  | 0.064817972 | 0.94791183  |
| asparagine.pcaec421                | 0.000780126  | 0.011928125 | 0.94794906  |
| pcaec386.taurine                   | 0.001901891  | 0.02911151  | 0.948005504 |
| c51.pcaac344                       | 0.002126915  | 0.032635669 | 0.948132476 |
| lysopcac182.lysopcac161            | -0.005579919 | 0.085671376 | 0.948164114 |
| pcaec385.smc261                    | 0.001751476  | 0.026900709 | 0.948182203 |
| pcaec421.pcaec340                  | -0.003353019 | 0.051501458 | 0.948185054 |
| smc241.pcaec383                    | 0.004585806  | 0.070479135 | 0.948216182 |
| pcaec321.methionine                | -0.001406705 | 0.021647831 | 0.948283575 |
| asparagine.c141oh                  | 0.005218398  | 0.080478583 | 0.948394268 |
| pcaec343.smc160                    | 0.006317617  | 0.097483168 | 0.948421928 |
| pcaec402.serotonin                 | 0.004279951  | 0.066125484 | 0.948487557 |
| pcaec340.pcaec362                  | -0.002024478 | 0.031307432 | 0.948535432 |
| lysopcac280.lysopcac204            | 0.002029284  | 0.031389329 | 0.948547836 |
| smc181.pcaac362                    | -0.002383112 | 0.036885664 | 0.948580235 |
| smohc141.pcaec322                  | -0.005438557 | 0.084292752 | 0.948650339 |
| pcaec422.c14                       | -0.00537369  | 0.083376652 | 0.948705244 |
| pcaac401.lysopcac182               | -0.004249069 | 0.066032665 | 0.948786939 |
| pcaec443.glycine                   | -0.000754982 | 0.011754177 | 0.948879958 |
| c2.isoleucine                      | 0.000705412  | 0.010988601 | 0.94890859  |
| pcaac320.pcaec402                  | -0.001969072 | 0.03068489  | 0.948927815 |
| c181.pcaec403                      | 0.001602494  | 0.024985958 | 0.948955611 |
| lysopcac140.pcaec382               | 0.00052184   | 0.008157233 | 0.949085219 |
| asparticacid.c18                   | 0.002502589  | 0.039185571 | 0.949170751 |
| c181.lysopcac281                   | 0.000564174  | 0.008839197 | 0.949201546 |
| pcaac420.pcaec423                  | -0.000462927 | 0.007253664 | 0.949206727 |
| pcaac404.serotonin                 | -0.004393361 | 0.068914127 | 0.949261223 |
| lysopcac180.ornithine              | -0.001897759 | 0.029769026 | 0.94926264  |
| histidine.prolinr                  | 0.002335049  | 0.036638156 | 0.949275966 |
| c4.c51dc                           | -0.007421272 | 0.116446537 | 0.949277195 |
| smc260.pcaec423                    | -0.000194292 | 0.003051031 | 0.949317191 |
| pcaac425.pcaec420                  | -0.002762429 | 0.043396413 | 0.949337156 |
| pcaec446.c4                        | -0.001066103 | 0.016787548 | 0.949456483 |

|                                   |              |             |             |
|-----------------------------------|--------------|-------------|-------------|
| c101.transhydroxyproline          | 0.001399326  | 0.022066468 | 0.949529153 |
| pcaac424.pcaac361                 | -0.002438314 | 0.03845948  | 0.949540748 |
| pcaac300.valine                   | 0.003081532  | 0.048658399 | 0.949596112 |
| pcaac365.lysopcac181              | 0.002127783  | 0.033643751 | 0.949663981 |
| glutamine.pcaec342                | -0.003104628 | 0.04911442  | 0.9496897   |
| pcaac426.pcaac300                 | 0.002178361  | 0.034474811 | 0.949709676 |
| pcaac364.c4                       | -0.001087527 | 0.017213235 | 0.949715513 |
| ornithine.kynurenine              | 0.000173423  | 0.002746066 | 0.949736424 |
| pcaac384.h1                       | 5.91E-05     | 0.000935429 | 0.94973976  |
| pcaec384.h1                       | 9.06E-05     | 0.001436365 | 0.949809225 |
| pcaec446.pcaec401                 | -0.001935762 | 0.030734916 | 0.949872228 |
| smc160.pcaec301                   | -0.002258366 | 0.035858539 | 0.949874333 |
| pcaec405.c102                     | 0.001563646  | 0.024831373 | 0.949881696 |
| glycine.c10                       | 0.000257103  | 0.004083536 | 0.949889346 |
| glutamine.c141                    | 0.001587586  | 0.025259704 | 0.949977125 |
| pcaec406.c4                       | 0.000712208  | 0.01133376  | 0.949985881 |
| pcaac281.pcaac300                 | 0.003856279  | 0.061411218 | 0.950021769 |
| c141oh.asymmetricdimethylarginine | 0.000715853  | 0.011415782 | 0.950090959 |
| pcaac386.pcaec420                 | 0.002899487  | 0.046241764 | 0.95009458  |
| asparagine.pcaec423               | -0.000570585 | 0.009106558 | 0.950131386 |
| pcaac426.pcaac322                 | -0.004339676 | 0.069309967 | 0.95016627  |
| pcaac321.pcaec385                 | -0.002873302 | 0.045937342 | 0.950217375 |
| pcaec404.pcaac424                 | 0.001505732  | 0.024082534 | 0.950236813 |
| leucine.smc260                    | -0.00081572  | 0.013053576 | 0.950263556 |
| pcaac421.pcaac321                 | 0.001267882  | 0.020291573 | 0.950269125 |
| c182.arginine                     | -0.002659839 | 0.04264409  | 0.950356721 |
| pcaac384.pcaec403                 | 0.003549636  | 0.056942504 | 0.950385161 |
| smohc241.pcaac426                 | 0.001765667  | 0.028325025 | 0.950386155 |
| pcaec342.glycine                  | -0.002151134 | 0.034518108 | 0.950399617 |
| arginine.c12                      | 0.00267026   | 0.042871463 | 0.950426442 |
| glycine.h1                        | 0.000169768  | 0.002729456 | 0.950495551 |
| smc241.prolinr                    | 0.002017347  | 0.032493279 | 0.950585583 |
| pcaec402.lysopcac181              | -0.00347718  | 0.056027608 | 0.950603993 |
| prolinr.pcaac361                  | 0.001876567  | 0.030240918 | 0.950610333 |
| kynurenine.smc180                 | 0.00067754   | 0.010937385 | 0.950695156 |
| pcaac342.pcaec423                 | 0.000261347  | 0.004224934 | 0.950765825 |
| pcaac403.arginine                 | -0.003551205 | 0.057444839 | 0.950796752 |
| smohc221.smohc222                 | -0.000747352 | 0.012096276 | 0.950825156 |
| ornithine.glutamicacid            | 0.002470886  | 0.04000044  | 0.950834858 |
| pcaec420.asparticacid             | 0.001617074  | 0.026199163 | 0.950873892 |
| c101.alanine                      | -0.000706738 | 0.011453354 | 0.950887055 |
| lysopcac204.pcaec322              | 0.003219375  | 0.052238457 | 0.950948542 |
| pcaac240.pcaec384                 | 0.001939153  | 0.03147145  | 0.950958232 |
| pcaac403.pcaec386                 | -0.000565037 | 0.009170876 | 0.950961558 |
| pcaac323.c142                     | 0.00107165   | 0.017443187 | 0.951101033 |

|                               |              |             |             |
|-------------------------------|--------------|-------------|-------------|
| c8.smohc161                   | 0.000540301  | 0.008795201 | 0.951105259 |
| pcaac424.lysopcac160          | -0.003301304 | 0.053769032 | 0.951131834 |
| pcaac360.pcaac281             | -8.80E-05    | 0.001433428 | 0.951145088 |
| pcaac402.c14                  | 0.004220311  | 0.068778791 | 0.951161424 |
| lysopcac181.pcaac401          | -0.00013782  | 0.002246502 | 0.951170963 |
| pcaec380.pcaec405             | -0.004820707 | 0.078610425 | 0.951190534 |
| smc240.pcaac361               | -0.002551059 | 0.041621041 | 0.951215563 |
| serine.smc260                 | -0.001495644 | 0.02441538  | 0.951242811 |
| pcaec420.pcaac404             | 0.000313101  | 0.005122318 | 0.951348855 |
| pcaec421.pcaec384             | 0.001265968  | 0.020725725 | 0.951382954 |
| acetylmithoine.c8             | -0.002971129 | 0.048691643 | 0.95143278  |
| smc240.c18                    | -0.001444576 | 0.023720156 | 0.95152698  |
| c10.pcaac360                  | -0.00165575  | 0.02719339  | 0.951537165 |
| alphaaminoadipicacid.pcaac360 | 0.001058439  | 0.017384752 | 0.951540958 |
| pcaac386.pcaac320             | 0.001926153  | 0.031640599 | 0.951546682 |
| putrescine.pcaec343           | -0.00276239  | 0.045382868 | 0.951552585 |
| pcaac363.pcaec362             | -0.000916655 | 0.015091631 | 0.951655359 |
| c101.pcaac343                 | -0.001243648 | 0.020501854 | 0.951718166 |
| lysine.smohc241               | -0.006230465 | 0.102719175 | 0.951722104 |
| pcaac240.pcaac360             | -0.003752438 | 0.061921469 | 0.951766131 |
| c12.lysopcac161               | 0.003331815  | 0.054996517 | 0.951780162 |
| prolinr.isoleucine            | -0.000984919 | 0.016268966 | 0.951813983 |
| c182.c162                     | 0.006914072  | 0.114305832 | 0.951855532 |
| pcaac381.c10                  | -0.000259601 | 0.0042964   | 0.95190686  |
| pcaec403.pcaac422             | -0.007107799 | 0.117783589 | 0.951967804 |
| pcaac341.c10                  | 0.000131803  | 0.002185396 | 0.951995955 |
| pcaac320.pcaac322             | 0.00433309   | 0.071971592 | 0.952079655 |
| pcaec361.c102                 | 0.001847321  | 0.030684542 | 0.952081195 |
| lysopcac170.h1                | 0.000405654  | 0.006738399 | 0.952083827 |
| pcaec340.serotonin            | 0.004136761  | 0.068732301 | 0.952094758 |
| acetylmithoine.pcaac360       | 0.000775775  | 0.012893142 | 0.952108266 |
| isoleucine.c10                | 0.000417853  | 0.006949317 | 0.952140808 |
| citruiline.pcaac365           | 0.001975433  | 0.032862446 | 0.952153886 |
| pcaec424.pcaec361             | 0.000553249  | 0.009220788 | 0.952242894 |
| c141.pcaac323                 | 0.003850686  | 0.064270999 | 0.952312013 |
| lysopcac280.pcaac240          | 0.001833221  | 0.030634653 | 0.952369132 |
| pcaec421.methioninesulfoxide  | 0.000793897  | 0.0132733   | 0.952392868 |
| isoleucine.pcaac360           | 0.001387222  | 0.023194885 | 0.952396331 |
| creatinine.pcaec322           | -0.002969112 | 0.049648634 | 0.952400093 |
| lysopcac204.pcaac362          | 0.000679834  | 0.011371992 | 0.952416858 |
| c18.methionine                | -0.002863642 | 0.047947685 | 0.952462252 |
| c181.c51                      | -0.002784424 | 0.046641537 | 0.952482868 |
| pcaec386.c162                 | -0.003035941 | 0.051081087 | 0.95269323  |
| pcaec402.pcaac344             | -0.005527702 | 0.093022099 | 0.952701359 |
| pcaec364.pcaac422             | -0.002600826 | 0.043794539 | 0.952730403 |

|                                    |              |             |             |
|------------------------------------|--------------|-------------|-------------|
| pcaac321.smohc161                  | 0.001059483  | 0.017847781 | 0.952750148 |
| creatinine.smohc141                | -0.004547592 | 0.076607808 | 0.952750286 |
| pcaac365.c10                       | 0.000190093  | 0.003202539 | 0.952754379 |
| pcaec363.c8                        | 0.001826548  | 0.030791637 | 0.952783978 |
| smohc221.pcaec401                  | -0.002079159 | 0.035090814 | 0.952838683 |
| pcaac300.pcaac322                  | 0.005377958  | 0.090896173 | 0.95290615  |
| pcaec362.ornithine                 | 0.001204239  | 0.020373321 | 0.952951716 |
| pcaac424.lysopcac204               | 0.004838388  | 0.081977258 | 0.953021302 |
| pcaec421.lysine                    | -0.004252023 | 0.072054932 | 0.953029454 |
| prolinr.smohc221                   | 0.00537495   | 0.091178254 | 0.953077904 |
| pcaec380.alanine                   | -0.000696099 | 0.011809847 | 0.953084003 |
| pcaec424.smc160                    | -0.002367727 | 0.040178483 | 0.953093557 |
| c0.pcaec386                        | 0.001173854  | 0.01995276  | 0.953171934 |
| citruiline.c10                     | -0.000178985 | 0.003044064 | 0.953198523 |
| pcaac402.alanine                   | 0.001279498  | 0.021768214 | 0.953214364 |
| c162.pcaac360                      | -0.000759522 | 0.012924939 | 0.953225627 |
| c16.acetylnithoine                 | -0.002549855 | 0.043508827 | 0.953351755 |
| lysopcac281.glutamicacid           | -0.003198156 | 0.054637541 | 0.953408541 |
| pcaac380.methionine                | 0.002115291  | 0.036162631 | 0.953440509 |
| smc240.pcaec365                    | -0.001721453 | 0.029446257 | 0.953466749 |
| pcaec446.pcaac320                  | 0.001782786  | 0.030526851 | 0.953514654 |
| pcaec401.c12                       | 0.002487702  | 0.042597354 | 0.953514804 |
| pcaac344.c10                       | 0.000228933  | 0.003920335 | 0.953518151 |
| c10.pcaec340                       | -0.001707999 | 0.029254033 | 0.953526983 |
| pcaac366.pcaec423                  | -0.000322256 | 0.005521293 | 0.953542102 |
| pcaec421.pcaec341                  | -0.001346488 | 0.023084738 | 0.953572294 |
| pcaac426.c10                       | 0.000155241  | 0.002662785 | 0.953594348 |
| pcaac240.glycine                   | -0.001586531 | 0.027242835 | 0.953645012 |
| pcaec401.serotonin                 | -0.005644683 | 0.096977469 | 0.953669254 |
| creatinine.smc261                  | -0.001073114 | 0.018444132 | 0.95368855  |
| smc241.pcaac366                    | -0.002897022 | 0.049827552 | 0.953721062 |
| c14.smc161                         | -0.00231515  | 0.039843565 | 0.953748856 |
| c141.c10                           | 0.000115748  | 0.001994226 | 0.953800084 |
| arginine.c102                      | -0.002080548 | 0.035859676 | 0.953817918 |
| pcaec425.c4                        | 0.000661638  | 0.011411658 | 0.953849764 |
| glutamine.pcaac320                 | 0.001095824  | 0.018902858 | 0.953855934 |
| smc241.smohc141                    | 0.001056019  | 0.018220554 | 0.953866873 |
| pcaec384.asymmetricdimethylarginir | 0.001244643  | 0.021480101 | 0.953877676 |
| kynurenine.pcaec446                | 0.00375883   | 0.064883515 | 0.953887227 |
| pcaac386.pcaac343                  | -0.00106874  | 0.018466974 | 0.953934065 |
| pcaac424.asymmetricdimethylarginir | -0.001438227 | 0.024881349 | 0.953989426 |
| pcaac420.serine                    | -0.002175442 | 0.037638367 | 0.953993322 |
| pcaec423.lysopcac182               | -0.004311753 | 0.074612344 | 0.954001118 |
| c51.lysopcac180                    | 0.002162265  | 0.037441706 | 0.954031768 |
| putrescine.pcaac363                | 0.000409656  | 0.00709632  | 0.954049415 |

|                              |              |             |             |
|------------------------------|--------------|-------------|-------------|
| pcaac381.asparagine          | -0.00060563  | 0.010491687 | 0.954052025 |
| c182.pcaec340                | 0.00105634   | 0.018314431 | 0.954089166 |
| pcaac362.smc241              | 0.001704134  | 0.029617209 | 0.954199953 |
| c10.pcaac322                 | 0.002349269  | 0.040837313 | 0.954208815 |
| smc241.pcaec380              | -0.002485926 | 0.043259191 | 0.954257835 |
| pcaec424.lysopcac182         | -0.004567402 | 0.079523038 | 0.954282404 |
| pcaec404.methioninesulfoxide | 0.000815623  | 0.014206501 | 0.954300686 |
| smohc141.pcaac365            | -0.002542558 | 0.044296003 | 0.954310786 |
| pcaec360.c3                  | 0.004499753  | 0.078479525 | 0.95436057  |
| pcaac381.lysopcac180         | -0.00272421  | 0.04755447  | 0.954400761 |
| pcaac426.pcaec343            | -0.003626045 | 0.063299521 | 0.954402493 |
| pcaac281.c102                | -0.00140544  | 0.024553487 | 0.95443746  |
| pcaec340.c10                 | 9.83E-05     | 0.001717303 | 0.954449753 |
| c8.c10                       | -0.000173801 | 0.003043293 | 0.954541055 |
| methionine.c4                | 0.000525485  | 0.00920459  | 0.95455712  |
| c2.lysopcac182               | 0.003820267  | 0.066918849 | 0.954558224 |
| pcaec340.pcaec386            | -0.000343645 | 0.006024559 | 0.954595871 |
| lysopcac280.c182             | 0.001895386  | 0.03323006  | 0.954597802 |
| pcaec383.smohc241            | -0.004006674 | 0.070326842 | 0.954650364 |
| pcaac343.c10                 | 0.000216813  | 0.003806634 | 0.954662704 |
| pcaec365.pcaec420            | -0.000962413 | 0.016901817 | 0.954674828 |
| lysopcac182.c18              | -0.001785942 | 0.031376538 | 0.95469212  |
| pcaec343.pcaec423            | -0.001087341 | 0.019118159 | 0.954727816 |
| lysopcac180.pcaec385         | 0.002079675  | 0.036582143 | 0.954747936 |
| pcaac424.pcaec383            | -0.008908604 | 0.156898847 | 0.954803745 |
| glutamine.pcaec365           | -0.001105667 | 0.019486534 | 0.954834951 |
| pcaac406.alanine             | -0.001546827 | 0.027274167 | 0.954855565 |
| c8.smc181                    | 0.001157879  | 0.020443927 | 0.954917009 |
| c4.ornithine                 | -0.002170767 | 0.038380134 | 0.954978374 |
| kynurenine.smc161            | 0.002796086  | 0.049457578 | 0.954997961 |
| lysopcac281.asparticacid     | 0.002064808  | 0.036523955 | 0.95499959  |
| pcaec360.pcaac365            | 0.002796753  | 0.049508202 | 0.95503321  |
| pcaac425.serine              | -0.002959309 | 0.052397081 | 0.955042909 |
| pcaac341.pcaac342            | -0.000964188 | 0.017091614 | 0.955095045 |
| lysopcac181.pcaec425         | 0.000296267  | 0.005255067 | 0.955123337 |
| lysopcac203.smc181           | 0.000502702  | 0.008943247 | 0.955256219 |
| methioninesulfoxide.smc260   | -0.002500891 | 0.044533085 | 0.955297729 |
| pcaac366.pcaac364            | 0.002705212  | 0.048242468 | 0.955363496 |
| pcaec403.pcaec446            | 0.002430501  | 0.043375815 | 0.955396718 |
| pcaec381.threonine           | 0.001520421  | 0.027142616 | 0.955410665 |
| pcaac365.pcaac300            | -0.003144615 | 0.056196381 | 0.955457105 |
| pcaac343.pcaac424            | 0.000693659  | 0.012396699 | 0.955459054 |
| smc181.pcaec382              | 0.000644356  | 0.011515888 | 0.955460216 |
| pcaec383.lysopcac140         | -9.47E-05    | 0.001696182 | 0.955539745 |
| pcaac426.pcaec423            | -0.000243706 | 0.004370407 | 0.955611973 |

|                                   |              |             |             |
|-----------------------------------|--------------|-------------|-------------|
| pcaec404.alanine                  | 0.000881924  | 0.015828441 | 0.955647893 |
| c51.pcaac360                      | -0.000852531 | 0.015308325 | 0.955669358 |
| pcaac426.pcaec420                 | -0.003466613 | 0.06226284  | 0.95568018  |
| smohc221.transhydroxyproline      | 0.001432272  | 0.025759085 | 0.955739406 |
| smc241.pcaac383                   | -0.000180233 | 0.00324309  | 0.95576177  |
| pcaec425.c182                     | -0.001470175 | 0.026461712 | 0.955774394 |
| pcaec365.pcaec423                 | 0.000305242  | 0.00549541  | 0.955785257 |
| c8.c3                             | 0.003143217  | 0.056791703 | 0.955943115 |
| smohc161.c51                      | -0.001467567 | 0.026530066 | 0.9559664   |
| smc241.c102                       | 0.001221876  | 0.022106738 | 0.956002577 |
| pcaec404.pcaec365                 | 0.001131887  | 0.020483254 | 0.956012507 |
| c14.pcaec420                      | 0.001036053  | 0.018781365 | 0.956088252 |
| lysopcac204.asymmetricdimethylarg | 0.000998352  | 0.018100583 | 0.956094708 |
| pcaac360.isoleucine               | 0.001571882  | 0.028529364 | 0.956141468 |
| c2.pcaac383                       | 0.000379005  | 0.006888901 | 0.956205264 |
| pcaac386.pcaac300                 | 0.003691241  | 0.067193383 | 0.9562706   |
| pcaac425.pcaec384                 | 0.001127658  | 0.020568455 | 0.956358032 |
| isoleucine.pcaac422               | 0.00225393   | 0.041132322 | 0.956379974 |
| pcaac425.lysopcac161              | 0.003691954  | 0.067516332 | 0.956471162 |
| pcaac362.pcaec421                 | -0.000247219 | 0.004522567 | 0.956486215 |
| pcaec382.methioninesulfoxide      | 0.000927646  | 0.016971837 | 0.956490587 |
| smohc161.pcaec423                 | 0.000676109  | 0.012409074 | 0.956628085 |
| creatinine.pcaac322               | 0.001906732  | 0.034995777 | 0.956628419 |
| alanine.c51dc                     | 0.00505379   | 0.092860424 | 0.956677036 |
| pcaac343.smohc241                 | -0.002307987 | 0.042415893 | 0.95668519  |
| smc202.c10                        | 0.000117336  | 0.002160274 | 0.956763086 |
| smohc221.pcaec404                 | -0.000997509 | 0.018375462 | 0.9567873   |
| serine.pcaec383                   | -0.003457439 | 0.063720647 | 0.956807602 |
| pcaec300.pcaac344                 | 0.004164889  | 0.07676768  | 0.956812502 |
| smohc221.smc260                   | -0.001778627 | 0.032881508 | 0.956940642 |
| pcaec382.pcaac240                 | -0.001152459 | 0.021311133 | 0.956951948 |
| glutamicacid.transhydroxyproline  | -0.002007536 | 0.037140116 | 0.956971663 |
| pcaac362.pcaac364                 | -0.00292483  | 0.054126179 | 0.95698421  |
| pcaec386.pcaec420                 | 0.001236617  | 0.022885307 | 0.956985679 |
| pcaec384.lysopcac203              | -0.00056705  | 0.010496867 | 0.956997221 |
| pcaec364.lysopcac140              | -5.33E-05    | 0.000987636 | 0.957020467 |
| asparticacid.pcaec386             | -0.000429035 | 0.007966614 | 0.957129838 |
| pcaec380.pcaac344                 | 0.00294347   | 0.054676404 | 0.957145541 |
| pcaac381.smc261                   | 0.001746382  | 0.032473896 | 0.95719036  |
| pcaac385.asparagine               | -0.000329048 | 0.006126138 | 0.957242729 |
| pcaec342.lysopcac280              | -0.000517215 | 0.009632854 | 0.957258136 |
| pcaec301.ornithine                | 0.000938691  | 0.017483685 | 0.957260744 |
| lysine.pcaec362                   | -0.000489756 | 0.009122158 | 0.957261472 |
| pcaec322.methionine               | -0.000961725 | 0.017927862 | 0.957296835 |
| pcaec421.pcaac421                 | 0.004145871  | 0.07730414  | 0.957307562 |



|                                     |              |             |             |
|-------------------------------------|--------------|-------------|-------------|
| lysopcac181.pcaac366                | -0.0011398   | 0.021287356 | 0.95737684  |
| serotonin.lysopcac160               | -0.000592362 | 0.011064175 | 0.95738063  |
| pcaac360.pcaac360                   | 0.002026722  | 0.037869003 | 0.95739612  |
| pcaac381.smc202                     | -0.00201136  | 0.03761074  | 0.957428688 |
| pcaac361.smc161                     | -0.004080406 | 0.076459203 | 0.957517159 |
| c141.pcaac361                       | 0.001382156  | 0.025935936 | 0.957577562 |
| citruline.c162                      | -0.005202753 | 0.097839395 | 0.95766877  |
| pcaac281.pcaac382                   | 0.000452474  | 0.008518895 | 0.957718304 |
| pcaac362.c4                         | -0.000599257 | 0.01135237  | 0.957978584 |
| pcaac422.smc181                     | -0.000364007 | 0.006898998 | 0.957998114 |
| serine.pcaac363                     | 0.000526455  | 0.009979104 | 0.958003381 |
| pcaac240.alanine                    | 0.001082385  | 0.020527222 | 0.958024425 |
| asparticacid.pcaac423               | -0.002072328 | 0.039325949 | 0.958050728 |
| h1.smohc241                         | -0.000840449 | 0.015951881 | 0.958058421 |
| c3.pcaac320                         | 0.004661873  | 0.088514372 | 0.958073175 |
| ornithine.pcaac362                  | -0.000412129 | 0.007856412 | 0.958240477 |
| pcaac425.c141                       | -0.001843263 | 0.035144117 | 0.958247579 |
| c18.asparagine                      | -0.000721041 | 0.013758031 | 0.95827935  |
| putrescine.c10                      | 0.00012377   | 0.002363019 | 0.958303971 |
| c3.methionine                       | -0.001356424 | 0.025903201 | 0.958314052 |
| histidine.pcaac301                  | 0.0032718    | 0.062532818 | 0.958348879 |
| smc160.glutamicacid                 | -0.001492516 | 0.02860114  | 0.958458245 |
| smohc221.pcaac360                   | -0.002032271 | 0.038982761 | 0.958499018 |
| putrescine.pcaac422                 | -0.00125718  | 0.024146282 | 0.958552612 |
| smc260.c8                           | -0.001576963 | 0.030377422 | 0.958674158 |
| c101.c10                            | -0.001094167 | 0.021091727 | 0.958702586 |
| pcaac364.serine                     | -0.001774208 | 0.034212405 | 0.958716885 |
| smohc221.smohc241                   | -0.00447649  | 0.086470222 | 0.95878804  |
| ornithine.pcaac405                  | 0.002318929  | 0.044801542 | 0.958795296 |
| pcaac386.pcaac360                   | 0.00133107   | 0.025750482 | 0.958850145 |
| smohc161.c2                         | 0.002912984  | 0.056369696 | 0.958861796 |
| isoleucine.asymmetricdimethylargini | -0.001230292 | 0.023808596 | 0.958863497 |
| asparticacid.c101                   | -0.000993153 | 0.019257244 | 0.958944097 |
| isoleucine.pcaac362                 | -0.0004146   | 0.008039536 | 0.958946351 |
| pcaac382.taurine                    | 0.00250487   | 0.048632508 | 0.958997271 |
| prolinr.smohc241                    | -0.001452378 | 0.028213809 | 0.959019962 |
| pcaac361.lysopcac140                | 9.01E-05     | 0.001752941 | 0.959067146 |
| pcaac300.methioninesulfoxide        | 0.001701726  | 0.033103506 | 0.959076703 |
| smc202.isoleucine                   | -0.000965161 | 0.018776644 | 0.959079897 |
| pcaac403.lysopcac204                | 0.003733819  | 0.072696941 | 0.959112325 |
| pcaac344.c142                       | 0.000742209  | 0.01452862  | 0.959331397 |
| lysopcac182.pcaac323                | -0.003735552 | 0.073354302 | 0.959459627 |
| smc241.pcaac380                     | 0.002568498  | 0.050450293 | 0.959470234 |
| pcaac344.smc260                     | -0.000907985 | 0.017854947 | 0.95951641  |
| pcaac446.pcaac363                   | -0.001730598 | 0.034051427 | 0.959540525 |

|                                   |              |             |             |
|-----------------------------------|--------------|-------------|-------------|
| smohc222.lysopcac140              | -8.53E-05    | 0.001678576 | 0.959562047 |
| pcaec341.isoleucine               | 0.000668232  | 0.013155846 | 0.95956404  |
| methionine.c142                   | -0.001476134 | 0.029070316 | 0.95957634  |
| pcaec383.pcaec404                 | 0.003457263  | 0.068189732 | 0.959637913 |
| pcaec444.pcaec425                 | -0.000272507 | 0.005378124 | 0.959662717 |
| h1.pcaac364                       | -0.000811118 | 0.016011605 | 0.959671716 |
| alphaaminoadipicacid.glutamicacid | -0.002651802 | 0.052350006 | 0.959674024 |
| pcaac281.c10                      | 7.17E-05     | 0.001416307 | 0.959696284 |
| lysopcac160.pcaec443              | 0.003599345  | 0.071126719 | 0.959714241 |
| c102.arginine                     | -0.002022295 | 0.039964951 | 0.959716606 |
| pcaec380.pcaac401                 | 0.000189125  | 0.003748483 | 0.959834262 |
| alanine.c12                       | 0.001146076  | 0.022744466 | 0.959885613 |
| pcaac426.lysopcac161              | 0.004101391  | 0.081459642 | 0.959917813 |
| lysopcac204.pcaac420              | 0.003079843  | 0.061207663 | 0.959942321 |
| glycine.pcaec423                  | -0.001036315 | 0.020615011 | 0.959980502 |
| methionine.pcaac401               | -4.61E-05    | 0.000917672 | 0.95998337  |
| pcaac383.pcaac401                 | 0.000178468  | 0.003553608 | 0.960018997 |
| pcaac363.pcaac323                 | 0.003470099  | 0.069176854 | 0.96006578  |
| lysopcac204.c3                    | -0.000942689 | 0.018800525 | 0.960082547 |
| c12.ornithine                     | -0.001574906 | 0.031419854 | 0.960096146 |
| leucine.pcaec386                  | -0.000432582 | 0.008636909 | 0.960127337 |
| smohc222.methionine               | -0.000787561 | 0.015726728 | 0.960133268 |
| pcaec361.pcaec423                 | -0.0002342   | 0.00468103  | 0.960169896 |
| smc202.pcaac320                   | -0.002691813 | 0.053809805 | 0.960175662 |
| c102.pcaec385                     | -0.002897079 | 0.057923581 | 0.960182851 |
| c141.c51                          | -0.001186826 | 0.023742587 | 0.960205384 |
| pcaec362.pcaac240                 | 0.000431086  | 0.008628299 | 0.960225508 |
| leucine.histidine                 | 0.003642119  | 0.07292209  | 0.960238682 |
| pcaec343.ornithine                | 0.00131603   | 0.026354103 | 0.960245767 |
| pcaac420.threonine                | 0.001010298  | 0.020267718 | 0.960316395 |
| c102.pcaac421                     | -0.000404315 | 0.008118718 | 0.96035398  |
| serine.pcaac424                   | -0.000471766 | 0.009474312 | 0.960358934 |
| pcaec420.pcaac363                 | -0.00069494  | 0.013959454 | 0.96036801  |
| pcaec363.pcaac361                 | -0.003217709 | 0.064717584 | 0.960418533 |
| histidine.smc180                  | 0.001320935  | 0.026591172 | 0.960453167 |
| glutamine.smc160                  | -0.00241154  | 0.04859011  | 0.960489316 |
| pcaac426.acetylorlithoine         | 0.001120588  | 0.022578813 | 0.960489475 |
| glycine.pcaec301                  | 0.002052554  | 0.041381946 | 0.960513207 |
| citruiline.pcaec446               | 0.004226831  | 0.085229832 | 0.960518691 |
| pcaac402.pcaec386                 | -0.000507642 | 0.010241194 | 0.960538349 |
| ornithine.pcaec322                | 0.002834953  | 0.057193322 | 0.960538921 |
| c3.c51                            | 0.001098537  | 0.022188388 | 0.960585323 |
| c182.glutamicacid                 | -0.002539717 | 0.051301897 | 0.960588704 |
| pcaec423.pcaac361                 | -0.002601252 | 0.052646832 | 0.960664938 |
| lysopcac181.pcaac420              | -0.003769557 | 0.076319558 | 0.960679033 |

|                                   |              |             |             |
|-----------------------------------|--------------|-------------|-------------|
| pcaac406.pcaec422                 | 0.000825296  | 0.016739506 | 0.960750192 |
| c51dc.smc180                      | -0.000731045 | 0.014847569 | 0.960802376 |
| alanine.pcaac360                  | -0.001563239 | 0.031784074 | 0.960845015 |
| lysopcac161.asymmetricdimethylarg | 0.001066998  | 0.021709648 | 0.960872478 |
| pcaec420.pcaec402                 | -0.002064393 | 0.042036749 | 0.960903765 |
| pcaac385.c10                      | 0.000129008  | 0.002627838 | 0.960916809 |
| smohc141.pcaac424                 | -0.000347096 | 0.007077369 | 0.960956358 |
| asparagine.pcaac401               | -3.64E-05    | 0.000743816 | 0.961005027 |
| c3.pcaac401                       | 8.42E-05     | 0.001720148 | 0.961011138 |
| pcaac384.pcaec386                 | -0.000675475 | 0.013792737 | 0.961011196 |
| pcaac343.pcaec386                 | 0.000380406  | 0.007769793 | 0.961022799 |
| pcaac321.pcaec361                 | -0.000510821 | 0.010436284 | 0.961033088 |
| pcaac240.arginine                 | 0.00150834   | 0.030820974 | 0.961039392 |
| smc241.isoleucine                 | 0.000884173  | 0.018105221 | 0.961121735 |
| alanine.putrescine                | -0.001477627 | 0.030259898 | 0.961124928 |
| c181.putrescine                   | 0.00152251   | 0.031180068 | 0.961126201 |
| smc161.pcaac321                   | 0.000970798  | 0.019889205 | 0.961141558 |
| pcaec360.c8                       | 0.002247691  | 0.046116547 | 0.961197989 |
| glutamine.pcaec341                | 0.002080651  | 0.042735338 | 0.961239723 |
| c162.c10                          | -0.000700879 | 0.014395702 | 0.961239919 |
| pcaec424.pcaac383                 | 0.000212381  | 0.004374538 | 0.961349056 |
| h1.c4                             | -0.002722055 | 0.056072086 | 0.96135209  |
| lysine.acetylnithoine             | 0.001365469  | 0.028130936 | 0.961356777 |
| serine.pcaec386                   | -0.000270578 | 0.00557675  | 0.961373337 |
| h1.pcaec362                       | 0.000938558  | 0.019361617 | 0.96140812  |
| c14.pcaac362                      | -0.001812851 | 0.037474165 | 0.961487014 |
| pcaec403.pcaac383                 | 0.000370499  | 0.007678706 | 0.961587104 |
| pcaec385.pcaec420                 | 0.001136361  | 0.023551452 | 0.96158714  |
| creatinine.c10                    | -0.000126187 | 0.0026163   | 0.961602343 |
| c51dc.pcaac401                    | 0.000304665  | 0.006326013 | 0.961658332 |
| pcaac343.pcaac401                 | -0.000133953 | 0.002783383 | 0.961685998 |
| pcaac364.lysopcac182              | 0.001651307  | 0.034423012 | 0.961809205 |
| glycine.c51dc                     | -0.005016379 | 0.104681789 | 0.961849576 |
| pcaac385.pcaec423                 | -0.000168584 | 0.003528353 | 0.961961421 |
| pcaac363.smc260                   | -0.001123314 | 0.023598784 | 0.962103962 |
| pcaec340.pcaac240                 | 0.000659     | 0.013845155 | 0.962106038 |
| pcaec322.acetylnithoine           | 0.003049538  | 0.064077333 | 0.962111089 |
| c51.c10                           | -0.00029501  | 0.006211444 | 0.962188244 |
| pcaec446.smc202                   | -0.00234224  | 0.049371106 | 0.962230427 |
| glutamine.pcaac344                | 0.00227659   | 0.048003661 | 0.962243303 |
| methionine.pcaec402               | 0.001974715  | 0.041670834 | 0.962272665 |
| pcaec380.smc180                   | 0.000297131  | 0.006280278 | 0.962333637 |
| c4.c51                            | -0.000941001 | 0.019895014 | 0.962344326 |
| methionine.pcaec301               | 0.002636107  | 0.055739599 | 0.962348375 |
| pcaec402.lysopcac204              | 0.002073717  | 0.043937276 | 0.962424788 |

|                                     |              |             |             |
|-------------------------------------|--------------|-------------|-------------|
| pcaec443.kynurenine                 | -0.00058327  | 0.01245589  | 0.9627194   |
| c141.asymmetricdimethylarginine     | -0.00059276  | 0.012680522 | 0.962783959 |
| acetylorlithoine.pcaec422           | 0.001135614  | 0.024293483 | 0.962784051 |
| smc160.pcaec386                     | -0.001165815 | 0.024946527 | 0.962794429 |
| c162.pcaac385                       | -0.001364274 | 0.029275736 | 0.962899209 |
| smc161.c10                          | 6.81E-05     | 0.001460935 | 0.962905524 |
| serine.h1                           | 9.79E-05     | 0.002107266 | 0.963009945 |
| c51.c3                              | -0.001078138 | 0.023231994 | 0.963053079 |
| pcaac320.c10                        | 7.56E-05     | 0.001629198 | 0.963061299 |
| smc160.pcaac320                     | -0.003646359 | 0.078851468 | 0.963183606 |
| pcaec365.pcaec405                   | -0.00209539  | 0.04536616  | 0.96322735  |
| pcaec424.lysine                     | 0.003353862  | 0.072786365 | 0.963315053 |
| pcaac342.c10                        | 9.79E-05     | 0.002125258 | 0.963334845 |
| leucine.c10                         | 0.000311324  | 0.006761099 | 0.963340396 |
| c182.pcaac401                       | -9.40E-05    | 0.002043382 | 0.963370353 |
| pcaac406.pcaec385                   | -0.002608403 | 0.056848517 | 0.963469999 |
| pcaec341.c10                        | 6.84E-05     | 0.001492476 | 0.963494763 |
| asparticacid.pcaac363               | -0.000393334 | 0.008588159 | 0.963536677 |
| c141oh.pcaec383                     | -0.003918734 | 0.085870077 | 0.963667133 |
| pcaec404.lysopcac180                | -0.002500907 | 0.05485612  | 0.963703193 |
| pcaac361.pcaac401                   | 8.34E-05     | 0.001828966 | 0.963710069 |
| pcaac342.c16                        | 0.001646349  | 0.036153341 | 0.963744848 |
| lysopcac181.pcaec342                | 0.003545156  | 0.077952144 | 0.963792041 |
| pcaac426.arginine                   | -0.001167202 | 0.025682139 | 0.963816393 |
| leucine.asymmetricdimethylarginine  | -0.001551501 | 0.034179218 | 0.963860071 |
| pcaec420.pcaac360                   | -0.001345302 | 0.029648946 | 0.963874984 |
| lysopcac170.alanine                 | -0.001300997 | 0.028834915 | 0.964078322 |
| pcaec301.c141oh                     | 0.003104764  | 0.068835801 | 0.964090165 |
| smc260.pcaac361                     | -0.001446608 | 0.032132723 | 0.964157089 |
| pcaec382.lysopcac281                | 0.000685696  | 0.015242727 | 0.964184646 |
| pcaac385.pcaac401                   | 9.21E-05     | 0.002049898 | 0.964246811 |
| putrescine.c182                     | 0.001045108  | 0.02327394  | 0.964248691 |
| c141oh.acetylorlithoine             | -0.001430579 | 0.031858858 | 0.964249492 |
| pcaac380.asymmetricdimethylarginir  | 0.000948043  | 0.021129264 | 0.964277277 |
| lysopcac182.kynurenine              | -0.000186174 | 0.004155739 | 0.964332532 |
| c2.pcaac380                         | -0.001242986 | 0.02777168  | 0.964365918 |
| arginine.c142                       | -0.001398891 | 0.03125652  | 0.964367619 |
| pcaac240.acetylorlithoine           | 0.000795946  | 0.017812538 | 0.964423773 |
| pcaec403.glycine                    | -0.000650268 | 0.014566116 | 0.964457279 |
| pcaac365.pcaec423                   | -0.000167626 | 0.003758062 | 0.964487567 |
| pcaec420.pcaac401                   | -5.31E-05    | 0.001191702 | 0.964513992 |
| creatinine.asymmetricdimethylargini | 0.000664799  | 0.014930471 | 0.964549692 |
| smc161.c182                         | 0.000943948  | 0.021212126 | 0.964570327 |
| c142.kynurenine                     | -0.000254011 | 0.005713294 | 0.964602734 |
| pcaec381.pcaac344                   | -0.002777394 | 0.062490919 | 0.964614595 |

|                                   |              |             |             |
|-----------------------------------|--------------|-------------|-------------|
| smohc222.pcaec422                 | -0.001518007 | 0.034218645 | 0.964680468 |
| pcaac281.pcaac401                 | 0.000102865  | 0.002318861 | 0.964682093 |
| pcaec425.c10                      | 8.34E-05     | 0.001884219 | 0.964745713 |
| c18.pcaec423                      | -0.000211678 | 0.004795259 | 0.964854528 |
| glycine.lysopcac160               | 0.000630093  | 0.014288854 | 0.964891429 |
| pcaac363.pcaec423                 | 0.000195681  | 0.004439795 | 0.964909269 |
| c0.pcaac420                       | 0.001394123  | 0.031651043 | 0.964931341 |
| pcaac380.smc181                   | 0.00084989   | 0.01935984  | 0.965048325 |
| putrescine.taurine                | -0.002153542 | 0.049145556 | 0.965111957 |
| pcaac362.pcaac406                 | -0.00177894  | 0.040611587 | 0.965124606 |
| pcaac363.lysopcac281              | 0.000583635  | 0.013338175 | 0.965162009 |
| pcaac360.pcaac364                 | 0.002257168  | 0.05177211  | 0.965288204 |
| methioninesulfoxide.pcaac401      | 0.000564862  | 0.012973287 | 0.965334168 |
| c14.pcaac401                      | -9.86E-05    | 0.002268117 | 0.96539393  |
| lysine.pcaec364                   | -0.000546141 | 0.012581793 | 0.965440133 |
| pcaac426.pcaec361                 | 0.000670024  | 0.015482943 | 0.965545341 |
| pcaac405.pcaec365                 | -0.001222793 | 0.028305423 | 0.96560503  |
| pcaec445.c10                      | 6.31E-05     | 0.001461423 | 0.965640134 |
| pcaec301.histidine                | -0.002612401 | 0.060545047 | 0.965646334 |
| pcaac366.pcaac365                 | -0.002395923 | 0.05563908  | 0.965714915 |
| lysopcac281.pcaac384              | -0.001253752 | 0.029235751 | 0.965856272 |
| pcaec341.glutamicacid             | 0.001420288  | 0.033133168 | 0.965870714 |
| pcaec401.spermidine               | 0.00224722   | 0.052458419 | 0.965892943 |
| pcaec380.pcaec420                 | -0.000912662 | 0.021341478 | 0.965951371 |
| glutamicacid.c182                 | 0.002286898  | 0.053675146 | 0.966077426 |
| pcaac363.c10                      | 8.78E-05     | 0.002063395 | 0.966124848 |
| lysopcac161.pcaec401              | 0.002785137  | 0.065603005 | 0.966198269 |
| lysopcac281.pcaac401              | 9.72E-05     | 0.002298438 | 0.966314785 |
| lysopcac203.pcaac281              | -0.000125905 | 0.002976327 | 0.966319529 |
| pcaac381.pcaec446                 | -0.002217221 | 0.052462526 | 0.966350612 |
| pcaec402.putrescine               | 0.002188651  | 0.051808576 | 0.966364938 |
| pcaac364.c10                      | 0.000104544  | 0.002480485 | 0.966443315 |
| c5.c14                            | 0.001597158  | 0.037905856 | 0.966452537 |
| creatinine.lysopcac161            | -0.00235409  | 0.055885647 | 0.966461701 |
| pcaec386.pcaac364                 | -0.001925074 | 0.045924713 | 0.966625065 |
| pcaac300.c142                     | 0.000854344  | 0.020456512 | 0.966747696 |
| c162.methionine                   | 0.000827093  | 0.019835639 | 0.966800692 |
| pcaec385.acetylorithoine          | -0.002308544 | 0.055440792 | 0.966846463 |
| methionine.c3                     | -0.002984405 | 0.071794356 | 0.966902963 |
| methioninesulfoxide.putrescine    | -0.002080392 | 0.050074383 | 0.966921083 |
| pcaec381.lysine                   | 0.00376204   | 0.090654658 | 0.966958835 |
| lysopcac140.asymmetricdimethylarg | -0.000504613 | 0.01216946  | 0.966985141 |
| pcaac321.pcaec421                 | -0.000342527 | 0.008266085 | 0.967007356 |
| pcaac342.lysopcac182              | -0.00056333  | 0.01359744  | 0.967014089 |
| c14.c18                           | -0.002218036 | 0.053590139 | 0.967046133 |

|                                 |              |             |             |
|---------------------------------|--------------|-------------|-------------|
| c182.pcaac342                   | -0.001442216 | 0.034877799 | 0.96707663  |
| smc261.pcaac361                 | -0.00208019  | 0.050344116 | 0.967101407 |
| pcaec362.pcaac401               | -0.000125869 | 0.003047147 | 0.967111158 |
| pcaac362.smc240                 | 0.002141918  | 0.05195181  | 0.967173401 |
| c5.asparticacid                 | -0.000382648 | 0.009293757 | 0.967218213 |
| c162.spermidine                 | -0.002185082 | 0.053168267 | 0.967278011 |
| c3.serine                       | -0.00214645  | 0.052261045 | 0.96729853  |
| lysopcac281.c10                 | 7.89E-05     | 0.001922069 | 0.967307081 |
| pcaec401.pcaac321               | 0.000894761  | 0.021798167 | 0.967317773 |
| smc180.smohc222                 | 0.000203815  | 0.004975205 | 0.96738253  |
| ornithine.c102                  | -0.000484596 | 0.011830635 | 0.9673865   |
| pcaec300.pcaac401               | 9.15E-05     | 0.002239538 | 0.967469173 |
| acetylorlithoine.pcaac344       | 0.001882809  | 0.046175087 | 0.967534294 |
| lysopcac160.kynurenine          | -0.000412824 | 0.010138939 | 0.967581019 |
| pcaac420.c162                   | 0.001840931  | 0.045369992 | 0.96769302  |
| smc202.c141oh                   | 0.002569217  | 0.063432045 | 0.967750714 |
| lysopcac161.pcaac383            | 0.000414938  | 0.010252803 | 0.967776787 |
| glutamine.pcaac401              | -6.30E-05    | 0.001565563 | 0.967971184 |
| pcaac363.smc202                 | -0.001140482 | 0.028362875 | 0.967983928 |
| pcaec360.lysopcac203            | -0.00089992  | 0.022463551 | 0.968102544 |
| pcaec301.methioninesulfoxide    | -0.000429608 | 0.010733385 | 0.968131115 |
| pcaec343.pcaac401               | -8.78E-05    | 0.002198047 | 0.968188455 |
| pcaac422.pcaec446               | -0.002260287 | 0.056664272 | 0.968239611 |
| c2.glycine                      | 0.000775283  | 0.019497532 | 0.968339848 |
| c101.h1                         | -3.50E-05    | 0.000879576 | 0.968341846 |
| pcaac364.pcaec420               | 0.000715106  | 0.017986395 | 0.968343824 |
| pcaec401.pcaac422               | 0.003556013  | 0.089541094 | 0.96837915  |
| pcaec386.pcaec421               | 3.88E-05     | 0.000976697 | 0.968386486 |
| pcaec321.pcaec421               | -7.40E-05    | 0.001867845 | 0.968457444 |
| lysopcac203.methioninesulfoxide | -0.000690056 | 0.017426289 | 0.968470804 |
| phenylalanine.pcaec403          | 0.003156657  | 0.079936984 | 0.96855776  |
| lysopcac280.ornithine           | 0.004276866  | 0.109169732 | 0.968806858 |
| alanine.c51                     | 0.001552964  | 0.039710649 | 0.968862019 |
| pcaec322.c10                    | 7.29E-05     | 0.001863638 | 0.968873775 |
| pcaec422.c102                   | 0.000916101  | 0.02354382  | 0.969018415 |
| pcaec340.smc180                 | 0.001436313  | 0.036914499 | 0.969019446 |
| pcaac385.pcaac360               | -0.000822612 | 0.021150203 | 0.969031658 |
| lysopcac204.c10                 | 0.000409253  | 0.010543276 | 0.969093185 |
| methioninesulfoxide.pcaec365    | -0.000648287 | 0.01673506  | 0.96915549  |
| pcaac402.pcaac401               | 0.00039417   | 0.010191719 | 0.969205422 |
| pcaac341.pcaac343               | 0.001909008  | 0.049366727 | 0.969209843 |
| serotonin.pcaac401              | -5.28E-05    | 0.001367711 | 0.969284291 |
| lysopcac170.c10                 | -0.000248652 | 0.006448136 | 0.969295869 |
| c8.pcaac401                     | -6.99E-05    | 0.001814007 | 0.969311207 |
| pcaac406.pcaac426               | -0.00182819  | 0.047439699 | 0.969315523 |

|                                   |              |             |             |
|-----------------------------------|--------------|-------------|-------------|
| pcaec340.valine                   | -0.00229471  | 0.059551764 | 0.969318789 |
| pcaec340.c51                      | -0.001152968 | 0.029952408 | 0.969350382 |
| pcaac403.taurine                  | -0.002730129 | 0.071020254 | 0.96939159  |
| glutamicacid.pcaec341             | -0.001474595 | 0.038374949 | 0.96940399  |
| c16.pcaac362                      | 0.00027801   | 0.007241729 | 0.96943264  |
| asymmetricdimethylarginine.lysine | 0.002737868  | 0.071386973 | 0.969462473 |
| pcaec381.smc261                   | -0.002167221 | 0.056510411 | 0.969463795 |
| lysopcac281.pcaac341              | 0.000346449  | 0.009036017 | 0.969471668 |
| smohc141.pcaac401                 | 8.49E-05     | 0.002223305 | 0.969599703 |
| smc260.pcaac426                   | 0.001321309  | 0.034730729 | 0.969707675 |
| glutamicacid.lysopcac281          | -0.000348381 | 0.009160658 | 0.969719015 |
| pcaec425.pcaac420                 | 0.00225485   | 0.059380435 | 0.969764537 |
| pcaac384.pcaac240                 | -0.000656544 | 0.017311283 | 0.969802071 |
| smc261.c10                        | 6.07E-05     | 0.001603055 | 0.969839925 |
| pcaac300.pcaac401                 | 0.000108749  | 0.002874543 | 0.969876794 |
| pcaec340.lysopcac281              | 0.000511988  | 0.013538108 | 0.969887601 |
| pcaac383.c141oh                   | -0.003815976 | 0.100984367 | 0.969911888 |
| c2.c10                            | -0.001232429 | 0.0326182   | 0.96991531  |
| c182.pcaac322                     | -0.001640912 | 0.043454152 | 0.969932486 |
| pcaac421.serotonin                | -0.003694785 | 0.097874296 | 0.96994172  |
| c101.pcaac322                     | 0.001419021  | 0.037622301 | 0.969967785 |
| pcaac320.valine                   | 0.001199165  | 0.031821699 | 0.969994575 |
| lysopcac181.methionine            | -0.000988787 | 0.02629323  | 0.970056456 |
| pcaac365.pcaec340                 | -0.001386782 | 0.036912975 | 0.970086044 |
| lysopcac140.h1                    | -0.000115083 | 0.003074721 | 0.970197494 |
| smc181.c10                        | 6.58E-05     | 0.00175952  | 0.9702076   |
| asparagine.c4                     | -0.000219026 | 0.005856678 | 0.970222385 |
| pcaec386.c4                       | 0.000703682  | 0.018868373 | 0.970304659 |
| pcaac322.c4                       | -0.000297788 | 0.007993461 | 0.970336728 |
| c16.c3                            | -0.002495755 | 0.067232138 | 0.970442194 |
| pcaac362.isoleucine               | -0.00078067  | 0.021041105 | 0.970457581 |
| pcaec443.pcaec386                 | 0.000484318  | 0.013061168 | 0.970474563 |
| smohc222.c10                      | 5.69E-05     | 0.001534411 | 0.970484184 |
| pcaec406.smc240                   | 0.00215697   | 0.058296096 | 0.970538662 |
| smohc222.pcaac402                 | -0.002412915 | 0.065244068 | 0.970552471 |
| pcaec342.pcaec423                 | 0.000271176  | 0.007355304 | 0.970643879 |
| pcaec423.prolinr                  | 0.001155554  | 0.03136369  | 0.970663269 |
| pcaac403.pcaac401                 | 0.000287129  | 0.007798018 | 0.970681558 |
| asparagine.smohc241               | -0.002190136 | 0.059504594 | 0.970693133 |
| pcaac342.pcaac401                 | -8.87E-05    | 0.002413597 | 0.970731805 |
| pcaec445.pcaac401                 | -0.000179366 | 0.004883949 | 0.970757217 |
| acetylmithoine.pcaec421           | 0.000261391  | 0.007131241 | 0.970813977 |
| lysopcac203.pcaac365              | 0.002115039  | 0.057762269 | 0.970844266 |
| histidine.pcaac320                | 0.000786659  | 0.021490587 | 0.970853386 |
| pcaac360.pcaec421                 | 6.71E-05     | 0.001838625 | 0.970942729 |

|                              |              |             |             |
|------------------------------|--------------|-------------|-------------|
| smc160.pcaac300              | -0.00190587  | 0.052272817 | 0.970968595 |
| pcaac404.c10                 | 0.000126899  | 0.003482775 | 0.970987692 |
| pcaec300.methioninesulfoxide | -0.00054833  | 0.015053295 | 0.970995777 |
| pcaac404.c101                | -0.000160585 | 0.004408919 | 0.970998293 |
| c4.c10                       | 0.000633816  | 0.0174155   | 0.971021364 |
| lysopcac181.glutamicacid     | 0.001251366  | 0.034415995 | 0.971048235 |
| glutamine.c3                 | -0.001245847 | 0.03434056  | 0.971112566 |
| pcaac421.c182                | -0.001065366 | 0.029373313 | 0.971119963 |
| pcaec425.smc160              | -0.001014838 | 0.027984742 | 0.971124672 |
| lysopcac281.pcaec402         | -0.002541163 | 0.070131932 | 0.971148493 |
| isoleucine.c102              | -0.000451    | 0.01245541  | 0.971168278 |
| pcaac323.c0                  | 2.96E-05     | 0.000818471 | 0.971188926 |
| pcaac385.glycine             | -0.000877451 | 0.024289453 | 0.971235456 |
| smc241.c8                    | 0.00118354   | 0.032766632 | 0.971239032 |
| c141.ornithine               | 0.000898113  | 0.024928644 | 0.971312996 |
| glutamine.glutamicacid       | -0.002087234 | 0.058031361 | 0.971360757 |
| h1.c10                       | -0.000117348 | 0.003273242 | 0.971453642 |
| pcaec405.c10                 | 9.34E-05     | 0.002620465 | 0.971627659 |
| c101.pcaec386                | -0.000257424 | 0.00722904  | 0.971645389 |
| pcaac381.pcaac366            | -0.00134015  | 0.037688145 | 0.971685826 |
| leucine.lysopcac181          | -0.001351619 | 0.038054063 | 0.97171808  |
| lysopcac280.pcaac425         | -0.003341165 | 0.094248214 | 0.971771957 |
| acetylorithoine.pcaac422     | -0.001758676 | 0.049653164 | 0.971797013 |
| pcaec422.pcaac401            | 6.93E-05     | 0.001959044 | 0.971845223 |
| c51dc.smc260                 | -0.000903037 | 0.02556929  | 0.971878184 |
| pcaac383.pcaec362            | -0.00045707  | 0.012978325 | 0.971957211 |
| pcaec365.asparagine          | -0.000258823 | 0.007355779 | 0.971982393 |
| pcaec443.lysopcac181         | 0.001748593  | 0.049779925 | 0.972030016 |
| putrescine.pcaac300          | 0.001147017  | 0.032663591 | 0.972038308 |
| pcaac281.pcaec421            | -4.00E-05    | 0.001138027 | 0.972040504 |
| pcaac425.c3                  | 0.00169785   | 0.04842152  | 0.972079785 |
| serotonin.pcaac363           | -0.00028738  | 0.008200217 | 0.972094533 |
| c4.pcaec402                  | -0.001534505 | 0.043915591 | 0.97217673  |
| smc260.c10                   | 5.82E-05     | 0.001668051 | 0.972230839 |
| pcaac341.pcaec421            | -9.10E-05    | 0.002611102 | 0.972242421 |
| pcaac405.pcaec423            | -0.000104445 | 0.003004535 | 0.972319722 |
| creatinine.pcaec423          | 0.000260557  | 0.007503928 | 0.972351354 |
| pcaec422.lysopcac204         | 0.001208608  | 0.034912041 | 0.972434211 |
| pcaec422.smc202              | -0.001406881 | 0.040656304 | 0.972445682 |
| pcaec446.smohc241            | -0.002423019 | 0.070078416 | 0.972468306 |
| histidine.pcaac401           | -2.10E-05    | 0.000607646 | 0.972535045 |
| c10.pcaac385                 | 0.000550799  | 0.015985237 | 0.972563092 |
| pcaac406.c4                  | 0.000787742  | 0.022939053 | 0.972655509 |
| lysopcac280.smohc141         | -0.000429969 | 0.012521297 | 0.972656817 |
| pcaec403.c141                | 0.001235143  | 0.035993199 | 0.972675102 |



|                       |              |             |             |
|-----------------------|--------------|-------------|-------------|
| h1.pcaec425           | 6.54E-05     | 0.001907964 | 0.972713142 |
| serotonin.lysopcac280 | -0.000534661 | 0.015609575 | 0.972725986 |
| pcaac366.pcaec420     | 0.001059638  | 0.031118441 | 0.972885439 |
| lysopcac161.serine    | -0.001358451 | 0.039964337 | 0.972933333 |
| pcaec343.pcaac424     | -0.000303807 | 0.008944999 | 0.972955381 |
| methionine.smohc161   | 0.000844423  | 0.024862961 | 0.972956002 |
| pcaec423.putrescine   | 0.001277005  | 0.0376241   | 0.972973494 |
| creatinine.lysine     | 0.002078657  | 0.06128628  | 0.97299257  |
| pcaac341.pcaec386     | 0.00018326   | 0.005412489 | 0.973039071 |
| pcaac424.pcaec382     | -0.001293545 | 0.038231691 | 0.97305847  |
| pcaec340.pcaac401     | 5.92E-05     | 0.001751892 | 0.973074582 |
| ornithine.pcaac366    | 0.000427659  | 0.012672293 | 0.973127574 |
| glutamicacid.pcaac322 | -0.001117809 | 0.033140072 | 0.973141683 |
| c2.pcaac401           | -5.60E-05    | 0.001660978 | 0.97314726  |
| pcaec402.pcaac420     | 0.004550331  | 0.135070641 | 0.973174561 |
| pcaac384.pcaac344     | -0.002082848 | 0.061906676 | 0.973209235 |
| pcaac380.pcaec301     | 0.002072341  | 0.061597916 | 0.973210774 |
| pcaec444.pcaac344     | -0.001764674 | 0.052515172 | 0.973242538 |
| c0.glutamicacid       | 0.001011274  | 0.030113895 | 0.973259645 |
| pcaac281.smc160       | -0.00316239  | 0.094180879 | 0.973262666 |
| smohc141.c51          | -0.000921488 | 0.027496962 | 0.973314778 |
| pcaec445.smc180       | 0.000420351  | 0.012548939 | 0.973327077 |
| smohc161.pcaec444     | 0.002984764  | 0.089637132 | 0.973485174 |
| pcaac381.valine       | 0.00079095   | 0.023790972 | 0.973526974 |
| pcaac323.c10          | 9.06E-05     | 0.002729055 | 0.97355382  |
| lysopcac161.smohc141  | -0.001397331 | 0.042194481 | 0.973629932 |
| pcaec404.pcaac361     | -0.001388519 | 0.042001934 | 0.973676079 |
| c162.pcaec340         | -0.000682002 | 0.020642405 | 0.973691668 |
| smohc221.pcaac343     | 0.000556192  | 0.016891257 | 0.973780074 |
| pcaec340.threonine    | 0.000714653  | 0.021783946 | 0.97387672  |
| asparagine.c3         | -0.001334667 | 0.040806065 | 0.973955403 |
| pcaec424.c182         | -0.00103428  | 0.031784023 | 0.974088087 |
| pcaec341.c18          | 0.000756621  | 0.023477823 | 0.974337897 |
| pcaac366.c10          | 9.79E-05     | 0.003042424 | 0.974374892 |
| alanine.pcaec382      | -0.000646511 | 0.020110017 | 0.97440027  |
| pcaac341.pcaec402     | 0.001201847  | 0.037482977 | 0.974467837 |
| pcaec360.c10          | 7.52E-05     | 0.002347202 | 0.974477152 |
| smohc221.smc180       | -0.000380244 | 0.011877101 | 0.9745068   |
| pcaac421.pcaac401     | -0.00013854  | 0.004339645 | 0.974578865 |
| pcaac361.pcaec386     | -0.000139702 | 0.00438896  | 0.974653689 |
| pcaac404.pcaac420     | 0.001736751  | 0.054598747 | 0.974670378 |
| glycine.pcaac401      | -0.000120157 | 0.003779395 | 0.974683582 |
| pcaac386.c10          | 7.47E-05     | 0.002357903 | 0.974763271 |
| lysopcac161.pcaec380  | -0.001535064 | 0.048556638 | 0.974825979 |
| pcaec364.c162         | 0.002367246  | 0.07494449  | 0.974847656 |

|                               |              |             |             |
|-------------------------------|--------------|-------------|-------------|
| pcaec405.alanine              | 0.000408554  | 0.012944392 | 0.974867076 |
| pcaec382.smohc241             | -0.002120493 | 0.067197046 | 0.974871787 |
| phenylalanine.pcaac320        | -0.001599231 | 0.050699527 | 0.974882157 |
| lysopcac281.c3                | 0.00071848   | 0.022800303 | 0.974907204 |
| pcaec422.phenylalanine        | -0.001312763 | 0.041683249 | 0.974921592 |
| lysopcac182.glutamicacid      | -0.001261353 | 0.040065321 | 0.974930628 |
| pcaac362.c10                  | 7.40E-05     | 0.002353136 | 0.974953502 |
| c18.serotonin                 | -0.002379244 | 0.07586302  | 0.975026195 |
| pcaec423.smc180               | -0.000162067 | 0.005167995 | 0.975028355 |
| pcaac422.c10                  | 7.29E-05     | 0.002325228 | 0.975035825 |
| lysopcac181.pcaec401          | -0.001389445 | 0.044342302 | 0.975048357 |
| pcaec444.pcaac426             | 0.001982074  | 0.063263704 | 0.975051689 |
| c4.asymmetricdimethylarginine | -0.000673063 | 0.021486006 | 0.975055441 |
| pcaec385.pcaec384             | 0.001238307  | 0.039568992 | 0.975079917 |
| lysopcac170.asparagine        | 0.000434003  | 0.013894073 | 0.975126353 |
| phenylalanine.c16             | 0.000983258  | 0.031510819 | 0.9751524   |
| isoleucine.pcaac364           | -0.000842041 | 0.026993024 | 0.975159608 |
| pcaec401.pcaac380             | -0.001632571 | 0.052508589 | 0.975241816 |
| c141.pcaec341                 | 0.001383706  | 0.044550996 | 0.975267754 |
| smc160.c142                   | -0.002046201 | 0.065886943 | 0.97526988  |
| smohc141.pcaac364             | 0.001424445  | 0.045986589 | 0.975334376 |
| pcaec343.pcaac383             | 0.000123012  | 0.003971864 | 0.975337866 |
| alanine.pcaec403              | 0.000976447  | 0.031572452 | 0.975372613 |
| pcaec420.lysopcac182          | 0.001077212  | 0.034889451 | 0.97541415  |
| c0.pcaac401                   | 3.94E-05     | 0.001277089 | 0.975464071 |
| smc180.glutamine              | 0.000366525  | 0.011932684 | 0.97554067  |
| pcaec424.pcaac322             | 0.001678526  | 0.054660668 | 0.975547017 |
| pcaec365.pcaac364             | -0.001643754 | 0.053559535 | 0.975561247 |
| pcaac342.pcaac424             | -0.000528129 | 0.017210434 | 0.975564187 |
| smc202.pcaec422               | -0.000614328 | 0.020035808 | 0.975584116 |
| pcaac402.c8                   | -0.001356051 | 0.044311626 | 0.975630999 |
| lysopcac281.c182              | 0.000891262  | 0.029155427 | 0.97565748  |
| pcaec300.pcaac320             | 0.002504222  | 0.081981598 | 0.975675947 |
| pcaec340.c3                   | 0.000669343  | 0.022007226 | 0.975780575 |
| smohc141.c182                 | -0.000747253 | 0.024612857 | 0.975823919 |
| pcaec443.smc180               | -0.000143387 | 0.004724521 | 0.975832378 |
| pcaec363.pcaac401             | -5.17E-05    | 0.001703884 | 0.97583995  |
| pcaac422.lysopcac160          | -0.001228876 | 0.040511309 | 0.975844713 |
| lysine.pcaec380               | -0.001365928 | 0.045074051 | 0.97586863  |
| pcaec383.c14                  | 0.001748178  | 0.057687884 | 0.975868651 |
| pcaac362.taurine              | 0.001337456  | 0.044373958 | 0.975998811 |
| smc241.pcaac364               | 0.001282889  | 0.042578551 | 0.976007268 |
| c182.pcaec363                 | 0.000313738  | 0.010440384 | 0.976070586 |
| lysopcac280.pcaac401          | 5.47E-05     | 0.001825568 | 0.976118345 |
| kynurenine.pcaec301           | -0.001630773 | 0.054622749 | 0.97622599  |

|                           |              |             |             |
|---------------------------|--------------|-------------|-------------|
| pcaac281.pcaac364         | -0.001286752 | 0.04323814  | 0.976302044 |
| pcaec342.pcaac383         | 0.000395471  | 0.013289366 | 0.976303001 |
| ornithine.pcaec420        | -0.000872541 | 0.029332501 | 0.976312461 |
| phenylalanine.isoleucine  | 0.000479971  | 0.016194449 | 0.976398896 |
| pcaec444.pcaac401         | -7.20E-05    | 0.002441555 | 0.976504289 |
| c2.c16                    | 0.001779022  | 0.060499229 | 0.976583826 |
| pcaec424.c10              | 5.08E-05     | 0.001730261 | 0.976604099 |
| kynurenine.pcaec385       | 0.001082852  | 0.036948623 | 0.976662412 |
| pcaec365.pcaec401         | -0.001143251 | 0.039108862 | 0.976721672 |
| c101.pcaac363             | -0.000314863 | 0.010813253 | 0.976812643 |
| c162.c16                  | 0.001804746  | 0.061989401 | 0.976816207 |
| pcaac343.pcaec402         | 0.000612784  | 0.021085788 | 0.976857851 |
| pcaac384.c101             | 0.000123114  | 0.004239285 | 0.976873993 |
| lysopcac161.pcaec385      | -0.000771227 | 0.026889034 | 0.977160081 |
| pcaec381.pcaec423         | 0.000404835  | 0.014161022 | 0.977234812 |
| pcaec343.lysopcac280      | -0.000198791 | 0.006960708 | 0.977257835 |
| citruiline.pcaac381       | 0.001172773  | 0.041205443 | 0.977335404 |
| smohc221.pcaec382         | -0.000912531 | 0.032090799 | 0.977355868 |
| pcaec444.c10              | 4.06E-05     | 0.001433695 | 0.977470417 |
| acetylnithoine.creatinine | -0.000148872 | 0.005267367 | 0.977493444 |
| h1.methionine             | 0.000287624  | 0.010195861 | 0.977535801 |
| pcaac386.pcaac362         | 0.000634116  | 0.022571521 | 0.977628373 |
| c141.pcaec423             | -0.000185606 | 0.006616952 | 0.977662984 |
| pcaec364.pcaec386         | 0.000522085  | 0.018620172 | 0.977672084 |
| c181.pcaac360             | 0.000588632  | 0.02101161  | 0.977691261 |
| pcaec383.pcaac380         | -0.001794061 | 0.064164266 | 0.977734399 |
| pcaec301.smohc241         | -0.000650745 | 0.023285193 | 0.977745317 |
| glutamine.tyrosine        | -0.000993773 | 0.035591673 | 0.977765384 |
| pcaec403.pcaec420         | 0.000798013  | 0.028586426 | 0.977769921 |
| c5.spermidine             | 0.001474888  | 0.052868115 | 0.977784503 |
| leucine.pcaec362          | -0.000271463 | 0.009770926 | 0.977875862 |
| pcaec340.smohc241         | 0.001732922  | 0.062393644 | 0.977882812 |
| pcaac401.pcaac421         | 0.001842758  | 0.066432264 | 0.977910768 |
| h1.smc180                 | 0.000476542  | 0.017186291 | 0.977919418 |
| pcaac343.c14              | 0.000964398  | 0.034786935 | 0.977923422 |
| pcaac363.pcaac401         | -5.65E-05    | 0.00204019  | 0.977941177 |
| serine.c101               | 0.000306124  | 0.011076187 | 0.977991103 |
| smohc221.pcaac383         | -0.00012025  | 0.004352669 | 0.978000046 |
| leucine.c16               | 0.001141916  | 0.04144453  | 0.978058864 |
| pcaec402.pcaac365         | 0.00134303   | 0.04875378  | 0.978063377 |
| pcaac344.pcaac424         | 0.000235242  | 0.008541443 | 0.978068105 |
| pcaec444.glutamicacid     | 0.001363876  | 0.049622556 | 0.978112895 |
| smohc222.pcaec343         | -0.001864622 | 0.067900377 | 0.978131887 |
| smc241.glycine            | -0.000659355 | 0.024069015 | 0.978185053 |
| pcaec425.pcaac403         | 0.000124031  | 0.00453235  | 0.978207791 |

|                                    |              |             |             |
|------------------------------------|--------------|-------------|-------------|
| asparticacid.c12                   | -0.001848858 | 0.067608454 | 0.978223124 |
| arginine.threonine                 | 0.000494215  | 0.018079947 | 0.978232334 |
| pcaac363.c12                       | 0.001023879  | 0.037512556 | 0.978264727 |
| pcaec424.threonine                 | -0.000598973 | 0.02199116  | 0.97831035  |
| serotonin.c51                      | -0.002381562 | 0.087759334 | 0.978389619 |
| pcaac420.pcaac384                  | -0.000941902 | 0.03483017  | 0.978465028 |
| smohc161.pcaac424                  | 0.00021057   | 0.00778847  | 0.978470302 |
| pcaac364.pcaac360                  | -0.0005082   | 0.018809254 | 0.9784842   |
| pcaac381.asymmetricdimethylarginir | -0.000500671 | 0.018546983 | 0.978503204 |
| lysopcac281.isoleucine             | 0.000432886  | 0.016068166 | 0.978546331 |
| pcaec445.smc181                    | 0.000451093  | 0.016773524 | 0.978584065 |
| pcaac386.pcaec385                  | 0.001357558  | 0.050681119 | 0.978669182 |
| pcaec363.pcaec420                  | 0.000556361  | 0.020795998 | 0.978695455 |
| smc260.pcaac320                    | -0.00161287  | 0.06040928  | 0.978738627 |
| pcaec404.c10                       | 6.89E-05     | 0.002586204 | 0.97877568  |
| pcaac383.lysopcac281               | 0.000208806  | 0.007849154 | 0.978815634 |
| pcaec343.glycine                   | 0.001023929  | 0.038495919 | 0.978818763 |
| pcaec443.putrescine                | 0.001149622  | 0.043242345 | 0.978828967 |
| pcaec382.pcaac361                  | -0.001376003 | 0.052167113 | 0.978995159 |
| prolinr.pcaac320                   | -0.000651605 | 0.024745387 | 0.979030541 |
| methionine.pcaac363                | 0.000285146  | 0.010895007 | 0.979158108 |
| pcaec382.pcaec420                  | -0.00068703  | 0.026336928 | 0.979226556 |
| smc180.c10                         | 4.13E-05     | 0.00159232  | 0.979322658 |
| putrescine.c142                    | 0.001078225  | 0.041594016 | 0.979356792 |
| pcaec446.lysopcac181               | 0.001908034  | 0.073745991 | 0.979396241 |
| pcaac380.pcaac420                  | 0.001890521  | 0.07340124  | 0.979489446 |
| smc240.pcaac364                    | -0.001106468 | 0.042974721 | 0.979496635 |
| smc260.lysopcac182                 | 0.000260075  | 0.010124577 | 0.97954401  |
| c14.c51dc                          | -0.002245647 | 0.087609611 | 0.979587823 |
| pcaec404.lysopcac181               | 0.001420791  | 0.055583411 | 0.979644348 |
| glutamine.pcaec402                 | 0.001236703  | 0.048434143 | 0.979666425 |
| pcaac386.c8                        | 0.001052598  | 0.041258299 | 0.979683388 |
| pcaec321.c10                       | 4.01E-05     | 0.001573877 | 0.979722022 |
| pcaac420.lysopcac181               | -0.001064954 | 0.041859347 | 0.979740038 |
| c10.lysopcac140                    | -3.02E-05    | 0.001188077 | 0.979747642 |
| pcaac361.pcaec402                  | 0.000583563  | 0.022972613 | 0.979770856 |
| c5.pcaac364                        | -0.000908115 | 0.035756441 | 0.979775077 |
| pcaec301.pcaec343                  | -0.001371111 | 0.054015067 | 0.979785725 |
| smohc141.c10                       | 4.07E-05     | 0.001604555 | 0.979800302 |
| pcaec401.pcaac404                  | 0.00018484   | 0.007305515 | 0.979851358 |
| pcaac323.histidine                 | 0.001090968  | 0.043139303 | 0.979860903 |
| smc181.c3                          | 0.000361187  | 0.014410891 | 0.98004081  |
| pcaac361.c10                       | 5.46E-05     | 0.002187306 | 0.980116916 |
| lysopcac170.pcaac401               | -7.12E-05    | 0.002864032 | 0.980197961 |
| pcaec360.pcaac281                  | -3.86E-05    | 0.001554851 | 0.98024387  |

|                        |              |             |             |
|------------------------|--------------|-------------|-------------|
| lysopcac281.pcaac365   | 0.001336325  | 0.05387934  | 0.980248837 |
| c18.pcaec446           | 0.000706223  | 0.028477653 | 0.980251211 |
| pcaac323.smc240        | 0.000714451  | 0.028831678 | 0.980266441 |
| c18.pcaec343           | 0.001368702  | 0.055283907 | 0.980284258 |
| lysopcac180.pcaac426   | -0.001174823 | 0.047676311 | 0.980376646 |
| smc241.c10             | 3.32E-05     | 0.001349932 | 0.980402238 |
| pcaec406.pcaac404      | 0.000121084  | 0.004929585 | 0.980439525 |
| c181.pcaac401          | -3.66E-05    | 0.001493705 | 0.980471412 |
| pcaac320.pcaac401      | 3.81E-05     | 0.001557386 | 0.980496199 |
| ornithine.c10          | 0.000221931  | 0.009081111 | 0.980538162 |
| c141.pcaac401          | -4.27E-05    | 0.001750536 | 0.980566122 |
| phenylalanine.c3       | 0.000638411  | 0.026187256 | 0.980586013 |
| pcaec342.pcaec420      | 0.000380737  | 0.015698673 | 0.980686216 |
| pcaec341.pcaec403      | -0.001150583 | 0.04751043  | 0.980714376 |
| pcaec443.pcaac240      | 0.000458811  | 0.018956827 | 0.980725943 |
| smohc241.valine        | 0.000839249  | 0.034726149 | 0.980754057 |
| c101.pcaac401          | -5.28E-05    | 0.00218571  | 0.980764435 |
| pcaec384.c51           | 0.000528205  | 0.021886385 | 0.98078087  |
| pcaac420.lysopcac281   | 0.000202756  | 0.008408043 | 0.980796314 |
| pcaac383.h1            | -6.67E-05    | 0.00277699  | 0.980880871 |
| c14.pcaac343           | 0.000531816  | 0.022277805 | 0.980989429 |
| c0.pcaec363            | -0.000213399 | 0.008962112 | 0.981037838 |
| pcaac386.h1            | 5.71E-05     | 0.002407735 | 0.981101171 |
| c16.putrescine         | -0.00088021  | 0.037178052 | 0.981145867 |
| pcaec405.c4            | 0.000326068  | 0.013778228 | 0.981153922 |
| pcaac383.c10           | 4.17E-05     | 0.001765377 | 0.981175929 |
| alanine.pcaac401       | -4.90E-05    | 0.002074957 | 0.981201877 |
| c181.pcaac384          | 0.001225346  | 0.051912943 | 0.981202942 |
| pcaac384.putrescine    | 0.000599132  | 0.025396417 | 0.981213018 |
| pcaac343.pcaec420      | -0.000662087 | 0.028131453 | 0.981257389 |
| pcaac344.pcaac401      | -0.000123671 | 0.005266545 | 0.981299593 |
| pcaec301.pcaac424      | -0.000142564 | 0.006076954 | 0.981317661 |
| phenylalanine.pcaec342 | 0.001686163  | 0.071962824 | 0.981340544 |
| lysopcac170.pcaac300   | -0.000965051 | 0.041324319 | 0.981402603 |
| pcaec360.smc202        | 0.000859301  | 0.036997252 | 0.981503729 |
| creatinine.pcaac401    | -1.04E-05    | 0.000449799 | 0.981556466 |
| smohc221.c10           | 3.84E-05     | 0.001657942 | 0.981563769 |
| pcaec343.glutamicacid  | -0.000926327 | 0.040122188 | 0.981613959 |
| pcaec420.pcaec401      | -0.001169222 | 0.050691858 | 0.981631758 |
| c141.c142              | -0.001153495 | 0.050048314 | 0.981645812 |
| pcaac343.pcaac363      | -0.000209314 | 0.009091586 | 0.981665594 |
| pcaac425.c10           | 5.64E-05     | 0.002457137 | 0.981711291 |
| pcaec423.c10           | 4.26E-05     | 0.001858093 | 0.981722974 |
| pcaac383.smc240        | -0.000718617 | 0.031358654 | 0.981750564 |
| pcaec425.lysopcac203   | -0.000469806 | 0.020532419 | 0.981778329 |

|                         |              |             |             |
|-------------------------|--------------|-------------|-------------|
| pcaec425.pcaac401       | -4.88E-05    | 0.002140586 | 0.981830642 |
| c182.isoleucine         | 0.000470831  | 0.020718409 | 0.981902511 |
| acetylmethionine.c10    | -8.37E-05    | 0.003687643 | 0.981924232 |
| pcaec365.lysopcac182    | -0.000444415 | 0.019617734 | 0.981959433 |
| methioninesulfoxide.c10 | 0.000111803  | 0.00493643  | 0.981963605 |
| pcaec361.ornithine      | -0.001251567 | 0.055532119 | 0.982051821 |
| pcaac404.pcaac403       | -0.000117616 | 0.00522623  | 0.982077954 |
| smohc141.pcaac360       | 0.000993957  | 0.044211225 | 0.982096176 |
| lysopcac160.pcaac385    | 0.000575074  | 0.025582484 | 0.982098409 |
| pcaec381.c10            | 7.78E-05     | 0.003467264 | 0.982125841 |
| lysopcac181.pcaec406    | 0.000216756  | 0.009666599 | 0.982143038 |
| pcaac281.c18            | -0.000486583 | 0.02184382  | 0.982260579 |
| smohc161.pcaac401       | 4.13E-05     | 0.001861401 | 0.98233114  |
| smohc241.c3             | 0.000368367  | 0.016619674 | 0.982348992 |
| pcaac425.putrescine     | 0.000605969  | 0.027417442 | 0.982399072 |
| c18.pcaac383            | -8.10E-05    | 0.003665104 | 0.982407317 |
| pcaac420.c10            | 3.72E-05     | 0.001683077 | 0.982408345 |
| pcaec361.pcaec422       | -0.000691264 | 0.031296495 | 0.982410218 |
| h1.pcaac401             | -3.49E-05    | 0.001581429 | 0.982423199 |
| pcaac406.c10            | 5.78E-05     | 0.002645324 | 0.982608991 |
| lysopcac180.pcaec406    | -0.000315862 | 0.014473941 | 0.982621036 |
| pcaec384.c10            | 3.44E-05     | 0.001584577 | 0.982698811 |
| pcaac401.c12            | -0.000941563 | 0.04344579  | 0.982741032 |
| pcaac365.c142           | -0.000431185 | 0.019909255 | 0.982752646 |
| pcaec402.c10            | 4.21E-05     | 0.001945751 | 0.982779617 |
| c2.acetylmethionine     | -0.000719531 | 0.033310348 | 0.982797804 |
| pcaac342.smc260         | -0.000496764 | 0.023069241 | 0.98285134  |
| acetylmethionine.h1     | 0.000189767  | 0.008818431 | 0.982862684 |
| pcaac366.c142           | -0.000593752 | 0.027605089 | 0.982871096 |
| pcaec361.pcaac401       | -0.002255952 | 0.104895013 | 0.982872699 |
| smohc161.glycine        | -0.000667004 | 0.03104287  | 0.982888802 |
| lysopcac180.pcaac401    | 5.36E-05     | 0.002495521 | 0.982891997 |
| pcaec383.c182           | 0.000796405  | 0.037223655 | 0.982961582 |
| smohc161.c16            | -0.001194719 | 0.055927187 | 0.982987937 |
| pcaec402.histidine      | -0.001376589 | 0.064480433 | 0.982998363 |
| c142.pcaec423           | 0.000248876  | 0.011673385 | 0.983021424 |
| pcaac321.pcaec384       | 0.001018454  | 0.047808722 | 0.983035204 |
| pcaec401.c10            | 4.99E-05     | 0.002343145 | 0.983047866 |
| pcaec422.smc180         | -9.75E-05    | 0.004583058 | 0.983049906 |
| pcaec401.pcaec420       | 0.0003607    | 0.017005445 | 0.983108296 |
| pcaac386.smohc241       | -0.001080598 | 0.050952095 | 0.9831105   |
| lysopcac280.smohc241    | -0.000864158 | 0.040830915 | 0.983145376 |
| pcaec363.pcaec365       | 0.000481352  | 0.022795944 | 0.98318409  |
| histidine.c141oh        | 0.001861529  | 0.088191199 | 0.983190316 |
| c0.pcaac323             | 0.001424646  | 0.067703755 | 0.983242495 |

|                              |              |             |             |
|------------------------------|--------------|-------------|-------------|
| c2.pcaec421                  | -0.000180042 | 0.00856037  | 0.983250694 |
| c8.c14                       | 0.000873894  | 0.04156086  | 0.983254838 |
| pcaac363.pcaac300            | -0.001773293 | 0.08436491  | 0.983260822 |
| putrescine.pcaac401          | 2.65E-05     | 0.001261435 | 0.983290166 |
| lysopcac182.lysopcac281      | 0.000224741  | 0.010717857 | 0.98330102  |
| pcaec341.pcaec444            | -0.002080526 | 0.099257835 | 0.983307407 |
| pcaac362.lysopcac182         | -0.00021449  | 0.010239404 | 0.983318018 |
| citruiline.h1                | 5.05E-05     | 0.002416258 | 0.98334725  |
| c102.isoleucine              | -0.000241454 | 0.011551764 | 0.983354305 |
| kynurenine.pcaac426          | 0.0009365    | 0.044824893 | 0.983361887 |
| pcaac362.smc181              | -0.000470992 | 0.022603555 | 0.983405956 |
| smc240.c10                   | 3.06E-05     | 0.001473843 | 0.983473595 |
| c8.pcaac360                  | -0.000559749 | 0.027014276 | 0.983498763 |
| pcaec424.pcaac384            | -0.001023058 | 0.049647807 | 0.983589686 |
| methioninesulfoxide.pcaec384 | -0.000572304 | 0.027805583 | 0.983608769 |
| pcaec340.prolinr             | -0.000843179 | 0.0410215   | 0.983630891 |
| smc160.threonine             | -0.000873662 | 0.042680663 | 0.983698429 |
| pcaec446.c10                 | 3.16E-05     | 0.001549223 | 0.983757253 |
| pcaac363.c14                 | -0.000551583 | 0.027070552 | 0.983773256 |
| pcaec362.pcaac363            | 0.000315726  | 0.015502114 | 0.983780502 |
| lysopcac182.pcaac344         | 0.000796701  | 0.039159562 | 0.983797759 |
| pcaac342.pcaec343            | 0.001492692  | 0.073454369 | 0.983816594 |
| pcaec342.c10                 | 3.18E-05     | 0.001572762 | 0.983895886 |
| pcaec444.pcaac363            | 0.000237301  | 0.011781186 | 0.983959081 |
| creatinine.pcaec361          | -0.00018749  | 0.009312041 | 0.983965665 |
| pcaec444.methioninesulfoxide | -0.000282687 | 0.01409409  | 0.984026986 |
| pcaac406.smc181              | 0.000343415  | 0.017129045 | 0.984033713 |
| smc180.smohc241              | -0.001567561 | 0.078218321 | 0.984039952 |
| c18.alanine                  | 0.000216182  | 0.010833837 | 0.984108848 |
| pcaec380.pcaec384            | -0.000431391 | 0.021625276 | 0.984113493 |
| asparagine.pcaac240          | -0.000317106 | 0.015944407 | 0.984161471 |
| ornithine.pcaac401           | -2.36E-05    | 0.001188313 | 0.984215066 |
| smohc241.smc160              | 0.001524436  | 0.077337603 | 0.984302239 |
| pcaec380.pcaac426            | -0.001630311 | 0.082777981 | 0.984315345 |
| pcaac320.smc202              | 0.000606668  | 0.030846668 | 0.98433746  |
| c141.lysopcac281             | 0.000166976  | 0.008499505 | 0.984354876 |
| lysopcac160.pcaec406         | 0.000262462  | 0.013457163 | 0.984467827 |
| pcaec384.taurine             | -0.000731038 | 0.037527015 | 0.984486283 |
| pcaec444.pcaec341            | -0.000744773 | 0.038320669 | 0.98452214  |
| pcaec361.c10                 | 3.32E-05     | 0.001711188 | 0.984530169 |
| smc160.pcaec422              | 0.000413271  | 0.021278615 | 0.984532814 |
| smc260.pcaac403              | 0.00033611   | 0.017490386 | 0.98469607  |
| c142.c12                     | -0.001596472 | 0.083143194 | 0.984708322 |
| pcaac420.pcaac401            | 0.000102548  | 0.005342954 | 0.984715    |
| putrescine.c3                | 0.000305503  | 0.015963621 | 0.984759303 |

|                                    |              |             |             |
|------------------------------------|--------------|-------------|-------------|
| smohc141.threonine                 | 0.000675991  | 0.035368009 | 0.984778722 |
| putrescine.threonine               | 0.00034542   | 0.018072983 | 0.984779156 |
| pcaec321.pcaac364                  | 0.000809475  | 0.04252995  | 0.984842422 |
| pcaec420.c10                       | 3.23E-05     | 0.001696908 | 0.984854949 |
| kynurenine.pcaac401                | 3.87E-05     | 0.002033856 | 0.98485635  |
| smohc161.c51dc                     | 0.00182964   | 0.096234482 | 0.984858942 |
| pcaec383.c10                       | 5.57E-05     | 0.002937639 | 0.984909003 |
| smohc161.smc180                    | -0.000505779 | 0.026759332 | 0.984947566 |
| lysopcac161.pcaac401               | -2.52E-05    | 0.001337111 | 0.984964488 |
| pcaec362.c10                       | 3.23E-05     | 0.001712872 | 0.984999929 |
| pcaac364.pcaec403                  | -0.001210698 | 0.064315968 | 0.98500872  |
| lysopcac180.smc202                 | 0.0005827    | 0.030971505 | 0.985016797 |
| pcaec343.pcaec340                  | 0.001129013  | 0.060039236 | 0.985024351 |
| phenylalanine.pcaac361             | -0.000911383 | 0.048616011 | 0.985070565 |
| pcaec365.smohc141                  | -0.001001839 | 0.053499515 | 0.985086819 |
| smohc241.pcaec386                  | 0.000106996  | 0.00572072  | 0.985105036 |
| asymmetricdimethylarginine.lysopca | -0.000202547 | 0.010857679 | 0.985143718 |
| pcaec365.glutamicacid              | 0.000708071  | 0.038009215 | 0.985164232 |
| isoleucine.pcaac426                | 0.000853476  | 0.045840256 | 0.985172547 |
| pcaac240.creatinine                | -0.00010166  | 0.005473233 | 0.985207878 |
| c8.glutamicacid                    | -0.000856738 | 0.04636322  | 0.985283753 |
| pcaac401.c162                      | -0.001313676 | 0.071190178 | 0.98530428  |
| pcaec360.pcaac384                  | -0.001237677 | 0.067137435 | 0.985318672 |
| pcaac300.pcaec362                  | 0.000349006  | 0.018956898 | 0.985338171 |
| smc180.c14                         | 0.00044089   | 0.024005556 | 0.985373458 |
| c102.pcaac424                      | 0.000177053  | 0.009656891 | 0.985398753 |
| smohc221.pcaac401                  | -8.09E-05    | 0.004412928 | 0.985401812 |
| pcaac365.pcaac404                  | -0.000135871 | 0.007431191 | 0.985438997 |
| smc180.pcaac401                    | 2.82E-05     | 0.001544284 | 0.985442331 |
| pcaec423.pcaec380                  | -0.001522644 | 0.083442466 | 0.985467698 |
| smc180.pcaec425                    | 0.000107643  | 0.005935953 | 0.985558319 |
| pcaec406.c10                       | 3.52E-05     | 0.001942165 | 0.985560273 |
| c102.pcaac380                      | -0.001085547 | 0.05991643  | 0.985571324 |
| c182.smohc161                      | 0.000116749  | 0.006455253 | 0.985596661 |
| pcaac383.pcaec340                  | 0.000835407  | 0.046278608 | 0.985623884 |
| pcaec382.c10                       | 6.42E-05     | 0.003565872 | 0.985659131 |
| c51dc.pcaac385                     | -0.000301595 | 0.016773741 | 0.98568081  |
| pcaac342.pcaac322                  | 0.001209349  | 0.06733024  | 0.985695731 |
| pcaac403.alanine                   | -0.000227443 | 0.012689322 | 0.985725582 |
| pcaec446.h1                        | -0.000108529 | 0.006086666 | 0.985799939 |
| pcaac406.pcaec383                  | -0.001363289 | 0.076461276 | 0.98580057  |
| pcaac364.pcaac401                  | -3.02E-05    | 0.001696753 | 0.985844119 |
| pcaec421.c10                       | 5.21E-05     | 0.002935794 | 0.985858964 |
| pcaac402.c142                      | 0.000476702  | 0.026892337 | 0.985882982 |
| pcaec421.valine                    | -0.000446191 | 0.025181753 | 0.985888949 |



|                                    |              |             |             |
|------------------------------------|--------------|-------------|-------------|
| pcaac281.pcaec380                  | -0.000584896 | 0.033081944 | 0.985919672 |
| pcaec421.pcaec386                  | 0.000146663  | 0.008308417 | 0.985941865 |
| pcaec443.pcaec363                  | -0.000491195 | 0.027867291 | 0.985962686 |
| pcaec380.c10                       | 5.20E-05     | 0.002950572 | 0.985974204 |
| asymmetricdimethylarginine.pcaac40 | -1.66E-05    | 0.000941959 | 0.985990047 |
| methionine.ornithine               | 0.000691327  | 0.039353876 | 0.986009894 |
| asparticacid.creatinine            | 0.000609506  | 0.034708098 | 0.986014685 |
| pcaec340.pcaac344                  | 0.001226832  | 0.070094864 | 0.986061239 |
| methioninesulfoxide.pcaec420       | 0.001233883  | 0.070517544 | 0.98606516  |
| acetylornithoine.pcaec385          | -0.000969667 | 0.055915927 | 0.986189389 |
| c142.c141oh                        | 0.001975453  | 0.114098297 | 0.98621162  |
| pcaac361.pcaec423                  | 5.86E-05     | 0.003390507 | 0.986225827 |
| pcaac281.pcaec362                  | 0.000373278  | 0.021592721 | 0.986232636 |
| ornithine.smc202                   | 0.000588711  | 0.034063913 | 0.986236365 |
| pcaec405.pcaac383                  | -9.25E-05    | 0.00535394  | 0.986240634 |
| pcaac381.smohc141                  | 0.000438395  | 0.025428191 | 0.986269831 |
| smc260.pcaec444                    | -0.00175586  | 0.101859646 | 0.986271796 |
| pcaec361.pcaac401                  | 2.90E-05     | 0.001681045 | 0.986273112 |
| pcaec445.valine                    | -0.000785202 | 0.045558261 | 0.986274116 |
| smc181.pcaec384                    | 0.000614845  | 0.036082645 | 0.986429568 |
| pcaac381.pcaac362                  | 0.000395755  | 0.023246097 | 0.986441782 |
| pcaec385.c10                       | 3.46E-05     | 0.00203473  | 0.986446225 |
| pcaec340.lysopcac280               | 0.000133589  | 0.007859392 | 0.986463432 |
| pcaac401.ornithine                 | -0.000516075 | 0.030504366 | 0.986526592 |
| pcaac380.pcaac401                  | 5.51E-05     | 0.003278416 | 0.986606202 |
| pcaac404.c8                        | -0.000537505 | 0.031980581 | 0.986614849 |
| c12.pcaec361                       | -0.000147878 | 0.008799857 | 0.986616995 |
| pcaec361.c18                       | 0.000489277  | 0.029154754 | 0.986634893 |
| c10.pcaac425                       | -0.001093481 | 0.065423976 | 0.986689279 |
| pcaec364.pcaac405                  | -0.000585083 | 0.035235378 | 0.986775912 |
| c5.pcaac401                        | 5.38E-05     | 0.00324349  | 0.986780577 |
| pcaac344.lysopcac160               | -0.000319314 | 0.019243844 | 0.986785423 |
| smc202.c3                          | 0.000257369  | 0.015559398 | 0.98682682  |
| pcaac323.pcaac401                  | 3.85E-05     | 0.00233165  | 0.986833801 |
| c101.putrescine                    | 0.000481048  | 0.029354965 | 0.986949271 |
| c182.pcaac424                      | -7.49E-05    | 0.004583274 | 0.986990768 |
| serine.creatinine                  | 0.000281838  | 0.017257686 | 0.986993972 |
| pcaac361.c3                        | 0.000447482  | 0.027426133 | 0.987006114 |
| pcaec406.smc202                    | -0.000625839 | 0.038531153 | 0.987064634 |
| c102.pcaac364                      | -0.000787949 | 0.048667327 | 0.987105952 |
| leucine.pcaac426                   | -0.000525064 | 0.032502265 | 0.987134475 |
| smc180.lysopcac203                 | 0.000193167  | 0.011971966 | 0.987150223 |
| lysopcac203.h1                     | -7.36E-05    | 0.004587772 | 0.987224239 |
| smohc222.pcaec402                  | -0.000684589 | 0.042777651 | 0.987254943 |
| pcaac320.pcaec421                  | 2.52E-05     | 0.001574597 | 0.987264502 |

|                           |              |             |             |
|---------------------------|--------------|-------------|-------------|
| pcaac402.pcaec383         | 0.003032931  | 0.189981771 | 0.987286079 |
| lysopcac203.taurine       | 0.000815982  | 0.051241892 | 0.987318098 |
| pcaac323.pcaac424         | 0.000118229  | 0.007484148 | 0.98741911  |
| lysopcac161.pcaac422      | -0.001063161 | 0.067674626 | 0.987488697 |
| pcaec342.pcaac401         | -3.06E-05    | 0.001950524 | 0.987495569 |
| pcaec422.pcaec341         | 0.000380013  | 0.024236594 | 0.987513043 |
| lysine.pcaec385           | -0.00063745  | 0.040668833 | 0.98751715  |
| isoleucine.glutamine      | -0.000318676 | 0.020428848 | 0.987576759 |
| pcaec364.c10              | 2.87E-05     | 0.001843686 | 0.987594847 |
| c18.methioninesulfoxide   | -0.000537287 | 0.034581942 | 0.987626667 |
| pcaec420.c8               | -0.000693614 | 0.044753844 | 0.987657098 |
| kynurenine.acetylnithoine | 0.000764493  | 0.049331035 | 0.987658064 |
| pcaec343.c10              | -3.17E-05    | 0.002046824 | 0.987660177 |
| arginine.taurine          | -0.000350743 | 0.022808301 | 0.987753089 |
| pcaec365.c51              | -0.000300495 | 0.019653308 | 0.987823221 |
| lysopcac280.c10           | -3.21E-05    | 0.002111833 | 0.987884667 |
| c182.asparagine           | -0.000142142 | 0.009352368 | 0.987895954 |
| pcaec361.spermidine       | -0.0007905   | 0.052030871 | 0.987900385 |
| pcaac341.c142             | 0.000393344  | 0.02594912  | 0.98792797  |
| pcaec342.pcaec386         | -0.000137751 | 0.009142388 | 0.988000395 |
| pcaec361.acetylnithoine   | -0.000522542 | 0.034793971 | 0.988039523 |
| lysopcac281.pcaec423      | 5.52E-05     | 0.003691562 | 0.988085028 |
| pcaac366.smc202           | 0.000666095  | 0.044570223 | 0.988097922 |
| pcaec382.pcaac401         | -5.36E-05    | 0.003589314 | 0.988115078 |
| pcaac403.c102             | 0.000578066  | 0.038791078 | 0.988132021 |
| lysopcac182.pcaac322      | -0.001099406 | 0.073861493 | 0.988145825 |
| pcaac362.pcaec386         | 0.000116995  | 0.007957323 | 0.988290674 |
| pcaec382.serotonin        | 0.001339612  | 0.09116379  | 0.988297231 |
| pcaec424.histidine        | 0.000923253  | 0.062863928 | 0.988303625 |
| smohc161.methionine       | -0.000200896 | 0.013821317 | 0.988424092 |
| pcaac281.c2               | -0.000745668 | 0.05143166  | 0.988453584 |
| lysopcac181.isoleucine    | -0.000631509 | 0.04356322  | 0.988455062 |
| c182.c12                  | 0.000643528  | 0.044492471 | 0.988481033 |
| pcaac240.histidine        | -0.00099052  | 0.068624365 | 0.988504783 |
| phenylalanine.pcaec402    | -0.000716916 | 0.049701191 | 0.98851228  |
| asparticacid.lysopcac204  | -0.000545492 | 0.038106095 | 0.988599424 |
| smohc221.c3               | 0.000273032  | 0.019400516 | 0.988791881 |
| lysopcac181.pcaac384      | 0.000638645  | 0.045477144 | 0.988815944 |
| pcaac384.c10              | 3.44E-05     | 0.002453708 | 0.988820067 |
| methionine.phenylalanine  | 0.000416904  | 0.029709043 | 0.988824161 |
| pcaac360.pcaec446         | 0.00076191   | 0.054417635 | 0.988849429 |
| pcaec362.pcaac360         | -0.000474502 | 0.033931072 | 0.988862846 |
| smohc241.pcaec383         | 0.000631024  | 0.045293322 | 0.988904544 |
| smc160.c10                | 1.84E-05     | 0.001318063 | 0.988904837 |
| lysopcac204.pcaec446      | -0.000677555 | 0.0486978   | 0.988919262 |

|                               |              |             |             |
|-------------------------------|--------------|-------------|-------------|
| lysopcac204.pcaec423          | 0.00016745   | 0.012111458 | 0.988989131 |
| pcaac401.pcaac342             | 0.000292378  | 0.021272755 | 0.98905403  |
| pcaac342.pcaac364             | -0.000995892 | 0.072714723 | 0.989092542 |
| smohc221.lysopcac160          | 0.00056167   | 0.041097815 | 0.989115793 |
| pcaec423.pcaac401             | 4.18E-05     | 0.003069731 | 0.989157286 |
| c16.pcaac340                  | 0.000766695  | 0.056455457 | 0.989184396 |
| pcaac366.threonine            | -0.000351053 | 0.025890739 | 0.989201537 |
| pcaec402.pcaac401             | 3.17E-05     | 0.002343234 | 0.989213056 |
| c12.kynurenine                | 8.44E-05     | 0.006241365 | 0.989234714 |
| lysopcac181.pcaec386          | -0.000265029 | 0.019723187 | 0.989298361 |
| phenylalanine.c182            | -0.000481    | 0.035885794 | 0.989325277 |
| smohc241.pcaac364             | 0.000475876  | 0.035695226 | 0.989382606 |
| c102.pcaac401                 | -3.70E-05    | 0.002780869 | 0.989404762 |
| glycine.pcaec362              | -0.000171805 | 0.012937199 | 0.989423799 |
| pcaec443.c10                  | 4.25E-05     | 0.003222012 | 0.989498162 |
| pcaec406.smc260               | -0.000522859 | 0.039694638 | 0.989509699 |
| pcaec381.pcaac384             | -0.000640809 | 0.04920316  | 0.989627795 |
| alphaaminoadipicacid.smohc241 | -0.000461142 | 0.035492246 | 0.989652484 |
| pcaec406.c51                  | 0.000583944  | 0.044990953 | 0.989663314 |
| pcaac403.c12                  | 0.000676622  | 0.052284776 | 0.989693622 |
| lysopcac281.ornithine         | -0.000317797 | 0.024689144 | 0.989748681 |
| c182.glutamine                | 0.000251419  | 0.019587321 | 0.989777463 |
| pcaec322.pcaac320             | 0.001473311  | 0.115430225 | 0.989834923 |
| pcaec421.threonine            | 0.000216229  | 0.017093832 | 0.989925789 |
| smc202.c182                   | -0.000267399 | 0.021142418 | 0.98992741  |
| pcaac320.smohc141             | 0.000370379  | 0.029334201 | 0.989944405 |
| citruline.pcaac401            | 1.28E-05     | 0.001016016 | 0.990003482 |
| pcaec301.c51dc                | -0.001076436 | 0.085864462 | 0.990015858 |
| pcaac281.c142                 | 0.000510345  | 0.041119044 | 0.990115451 |
| pcaec404.pcaec405             | 0.002945675  | 0.237692378 | 0.990130253 |
| pcaac240.smc260               | 0.00031784   | 0.025725027 | 0.990160145 |
| pcaac421.pcaac422             | 0.000827498  | 0.067126268 | 0.990182275 |
| smc181.lysopcac203            | 0.000186766  | 0.015178151 | 0.990200249 |
| serine.pcaac366               | -0.000238826 | 0.019421503 | 0.990206562 |
| pcaac364.pcaec380             | -0.000620266 | 0.050458144 | 0.990209994 |
| lysopcac281.pcaec301          | 0.000846786  | 0.069077195 | 0.990237176 |
| pcaac321.pcaac401             | 2.58E-05     | 0.002102309 | 0.990237628 |
| pcaac404.pcaac401             | 2.34E-05     | 0.001911579 | 0.990250055 |
| pcaec401.threonine            | 0.000319885  | 0.026215744 | 0.990282177 |
| pcaec446.pcaac401             | -7.87E-05    | 0.006470855 | 0.990307969 |
| smc160.lysopcac204            | -0.000305212 | 0.025165679 | 0.990341067 |
| smc181.pcaac401               | 1.74E-05     | 0.001440684 | 0.990365877 |
| smohc161.lysopcac203          | -0.000148179 | 0.012282643 | 0.990392044 |
| pcaec422.c10                  | 2.61E-05     | 0.002166059 | 0.990413562 |
| pcaac406.lysopcac160          | -0.000248632 | 0.020717233 | 0.990442111 |

|                                    |              |             |             |
|------------------------------------|--------------|-------------|-------------|
| methioninesulfoxide.pcaec340       | -0.000416721 | 0.034959967 | 0.990506815 |
| c2.serotonin                       | 0.00091739   | 0.077008395 | 0.99051247  |
| smohc141.pcaac240                  | -9.44E-05    | 0.007929791 | 0.990514298 |
| pcaec365.c182                      | 0.00030595   | 0.025819587 | 0.990562892 |
| pcaec424.asparagine                | -0.000146028 | 0.012340294 | 0.99057575  |
| glutamine.pcaec386                 | -0.000164732 | 0.013926782 | 0.990579691 |
| pcaec443.pcaac401                  | 4.90E-05     | 0.004151232 | 0.990605059 |
| lysopcac161.lysopcac281            | -0.000114794 | 0.009741845 | 0.990615418 |
| pcaac300.c8                        | -0.000438441 | 0.037230897 | 0.990621257 |
| pcaec386.c10                       | 2.76E-05     | 0.002347716 | 0.990647528 |
| ornithine.smc180                   | 0.000174791  | 0.015023069 | 0.990733868 |
| pcaac341.pcaac424                  | 5.36E-05     | 0.004623407 | 0.990764974 |
| kynurenine.pcaac362                | 0.000148598  | 0.012898745 | 0.990825071 |
| leucine.c182                       | 0.000361894  | 0.03156445  | 0.990868945 |
| smohc221.c142                      | 0.000428721  | 0.03739542  | 0.990869512 |
| pcaec383.pcaac320                  | -0.000883912 | 0.07714368  | 0.990874706 |
| smohc161.c10                       | 1.89E-05     | 0.001657825 | 0.990917707 |
| pcaec421.pcaac401                  | -4.45E-05    | 0.003925682 | 0.990981492 |
| c4.pcaac401                        | -3.17E-05    | 0.002816759 | 0.991024816 |
| smc202.pcaac401                    | -1.55E-05    | 0.001374766 | 0.991047961 |
| alanine.smohc241                   | 0.000294506  | 0.026288636 | 0.991077942 |
| c0.leucine                         | 0.000377176  | 0.033767237 | 0.991104153 |
| pcaac381.c18                       | -0.00059278  | 0.053186303 | 0.991123696 |
| pcaec382.pcaac424                  | -0.000171583 | 0.01556085  | 0.991218263 |
| pcaac360.c10                       | 2.92E-05     | 0.002653937 | 0.991227027 |
| isoleucine.c142                    | -0.000818363 | 0.074529569 | 0.991255075 |
| pcaec385.pcaac401                  | -1.72E-05    | 0.001578015 | 0.991309051 |
| lysopcac203.kynurenine             | 5.18E-05     | 0.004775871 | 0.991368247 |
| ornithine.c51                      | -0.000340216 | 0.03147464  | 0.991391396 |
| pcaec383.pcaac401                  | 3.02E-05     | 0.002813804 | 0.991444402 |
| pcaec402.smohc241                  | 0.000585735  | 0.054587569 | 0.991454318 |
| pcaec300.lysine                    | 0.00052021   | 0.048531781 | 0.991463274 |
| pcaac240.c162                      | 0.000696233  | 0.065261809 | 0.991503601 |
| pcaec300.asymmetricdimethylarginir | -0.000149414 | 0.014073059 | 0.991544424 |
| pcaac384.pcaac360                  | 0.000189854  | 0.018000351 | 0.991600037 |
| pcaec340.smc240                    | -0.0002485   | 0.023580054 | 0.991606939 |
| lysopcac161.methioninesulfoxide    | 0.000366856  | 0.034838787 | 0.991613658 |
| pcaec443.methioninesulfoxide       | -0.000162016 | 0.015425852 | 0.991635322 |
| pcaec401.pcaac401                  | -2.76E-05    | 0.002657454 | 0.991740132 |
| methionine.pcaac364                | -0.000353817 | 0.034317164 | 0.991788792 |
| pcaec402.lysopcac180               | 0.000535584  | 0.05241913  | 0.991862749 |
| smohc221.pcaac364                  | 0.000427292  | 0.041835086 | 0.991865627 |
| pcaac240.valine                    | -0.000298125 | 0.029436578 | 0.991934145 |
| lysine.pcaac401                    | -4.10E-06    | 0.000408348 | 0.992000386 |
| pcaac240.c10                       | 4.03E-05     | 0.004019277 | 0.992015154 |

|                                     |              |             |             |
|-------------------------------------|--------------|-------------|-------------|
| c16.pcaac401                        | -1.95E-05    | 0.001943608 | 0.992028527 |
| pcaac425.taurine                    | -0.000325962 | 0.032763158 | 0.992076406 |
| pcaec386.pcaac401                   | 2.10E-05     | 0.002115171 | 0.992094123 |
| pcaac322.pcaac363                   | -0.000230115 | 0.023234236 | 0.992112195 |
| pcaac384.lysopcac140                | 4.33E-05     | 0.004373827 | 0.992115234 |
| smc180.threonine                    | -0.000273925 | 0.027681846 | 0.992119074 |
| pcaec384.creatinine                 | -8.79E-05    | 0.00888023  | 0.992121199 |
| c3.pcaac420                         | 0.000355448  | 0.036257469 | 0.992192366 |
| smc181.c182                         | 0.000195392  | 0.019970762 | 0.992207951 |
| pcaac380.smc240                     | 0.000496639  | 0.051346994 | 0.992296881 |
| asymmetricdimethylarginine.tyrosine | -0.000388834 | 0.040497466 | 0.99235324  |
| lysopcac281.lysopcac280             | -0.000110371 | 0.011517551 | 0.992368021 |
| pcaec361.pcaac380                   | 0.000509543  | 0.053661423 | 0.992437597 |
| pcaac363.pcaec386                   | -0.000124216 | 0.013108226 | 0.992452984 |
| pcaac404.pcaec384                   | -0.000283282 | 0.030335747 | 0.992562858 |
| smc160.pcaac362                     | -0.000109505 | 0.011745265 | 0.992574714 |
| pcaac425.pcaec341                   | -0.000294861 | 0.03178019  | 0.992610726 |
| smc180.pcaac343                     | -0.000157962 | 0.017034405 | 0.992614713 |
| spermidine.glutamine                | -0.00034568  | 0.037571991 | 0.992672579 |
| pcaec405.pcaec341                   | -0.0001865   | 0.020276688 | 0.992674747 |
| pcaec386.pcaec343                   | 0.000753617  | 0.082421497 | 0.992717979 |
| pcaec384.pcaac401                   | -1.40E-05    | 0.001529596 | 0.992736132 |
| c3.pcaac365                         | -0.000473548 | 0.052223852 | 0.992778345 |
| lysopcac204.smc260                  | -0.000312297 | 0.034503901 | 0.992791571 |
| smc160.c182                         | -0.000205599 | 0.022728849 | 0.992795821 |
| asymmetricdimethylarginine.smc202   | 0.000294716  | 0.032759372 | 0.992835099 |
| pcaac421.glycine                    | -0.00021227  | 0.023706429 | 0.992868779 |
| pcaec402.pcaac424                   | -8.85E-05    | 0.009914555 | 0.992889313 |
| smc160.pcaac401                     | -1.63E-05    | 0.001823432 | 0.992893882 |
| pcaac421.c10                        | 1.80E-05     | 0.002020612 | 0.99290493  |
| pcaac403.phenylalanine              | 0.000542887  | 0.061424593 | 0.99296103  |
| pcaac405.pcaac363                   | -0.000101515 | 0.011531305 | 0.992988752 |
| pcaec363.c10                        | 1.42E-05     | 0.001624349 | 0.993053872 |
| lysopcac204.smc261                  | 0.000288721  | 0.033161547 | 0.993065963 |
| pcaec404.pcaec341                   | -0.000218461 | 0.025218767 | 0.993100894 |
| pcaec360.pcaac401                   | 1.67E-05     | 0.001935502 | 0.993108649 |
| c18.lysopcac280                     | -0.000256879 | 0.029835319 | 0.993142919 |
| pcaec384.pcaac404                   | -8.00E-05    | 0.009491333 | 0.993285931 |
| pcaac402.c10                        | -3.74E-05    | 0.004441519 | 0.993296517 |
| c3.spermidine                       | 0.000435933  | 0.051888003 | 0.993308935 |
| c182.pcaac404                       | 2.45E-05     | 0.002921523 | 0.99332067  |
| pcaac422.lysopcac182                | -0.000578048 | 0.06896316  | 0.993324421 |
| prolinr.pcaac401                    | -1.24E-05    | 0.001482235 | 0.993343019 |
| c18.acetylnithoine                  | 0.000282014  | 0.03381841  | 0.993358592 |
| pcaec341.pcaac401                   | 1.06E-05     | 0.001279723 | 0.993381345 |

|                                    |              |             |             |
|------------------------------------|--------------|-------------|-------------|
| pcaec425.prolinr                   | 0.000126349  | 0.015242413 | 0.993398217 |
| methionine.pcaac385                | 0.00020036   | 0.024241353 | 0.993417397 |
| prolinr.hl                         | 1.35E-05     | 0.001646515 | 0.993460603 |
| c14.pcaec384                       | -0.000356143 | 0.043813034 | 0.993526125 |
| pcaac320.c142                      | -0.000164218 | 0.020250163 | 0.993541443 |
| putrescine.pcaac364                | -0.000341031 | 0.042749023 | 0.993646535 |
| pcaac240.c101                      | -9.53E-05    | 0.011960274 | 0.993653003 |
| pcaec322.pcaec423                  | -5.98E-05    | 0.007549575 | 0.993690834 |
| pcaec365.taurine                   | -0.000234439 | 0.029615707 | 0.993695495 |
| c18.c182                           | -0.00042342  | 0.053529828 | 0.993700321 |
| pcaec342.pcaec403                  | 0.000263756  | 0.033439338 | 0.993718155 |
| pcaac424.c10                       | 3.19E-05     | 0.004048975 | 0.993733052 |
| c142.pcaac424                      | 4.57E-05     | 0.005841781 | 0.993772226 |
| lysine.asparticacid                | -0.000254004 | 0.032517766 | 0.993778969 |
| pcaec403.pcaac401                  | 2.69E-05     | 0.00347238  | 0.993836055 |
| c0.valine                          | -0.000630633 | 0.08227465  | 0.993895451 |
| serotonin.c141oh                   | -0.000705623 | 0.092263729 | 0.99390905  |
| pcaac360.pcaac401                  | -2.00E-05    | 0.002621134 | 0.99392102  |
| lysopcac140.pcaac401               | -0.000103649 | 0.013688845 | 0.99396968  |
| pcaac322.pcaec386                  | -5.42E-05    | 0.007165421 | 0.993981167 |
| pcaac366.pcaac384                  | 0.000334572  | 0.044396891 | 0.993998223 |
| pcaec425.pcaac361                  | 0.000351304  | 0.046772684 | 0.994018161 |
| pcaac322.arginine                  | 0.000176397  | 0.023944854 | 0.994132907 |
| alphaaminoadipicacid.pcaac401      | -7.58E-06    | 0.001029747 | 0.994138399 |
| smc180.c12                         | 0.000421294  | 0.057308291 | 0.994145212 |
| pcaec340.lysine                    | 0.00040105   | 0.054681985 | 0.994158855 |
| pcaac343.pcaec365                  | -0.000163804 | 0.02237358  | 0.994169149 |
| pcaec340.isoleucine                | -0.000163153 | 0.022819329 | 0.994305757 |
| pcaec443.pcaac424                  | -0.000437208 | 0.061576356 | 0.994345188 |
| c18.lysopcac181                    | -0.000218083 | 0.030918809 | 0.994382493 |
| pcaac320.pcaec343                  | -0.000613632 | 0.08744735  | 0.994411374 |
| pcaec360.asymmetricdimethylarginir | -0.000414913 | 0.059305437 | 0.994428059 |
| lysopcac203.c102                   | -0.000189548 | 0.027098862 | 0.994429282 |
| pcaec421.glycine                   | -0.000129001 | 0.018746032 | 0.994519401 |
| lysopcac281.pcaac386               | -0.000128407 | 0.018860154 | 0.994577662 |
| leucine.pcaac401                   | -3.94E-06    | 0.000587919 | 0.994661899 |
| c182.pcaac383                      | 2.41E-05     | 0.003608103 | 0.994688889 |
| c141oh.c10                         | -3.19E-05    | 0.004815193 | 0.994727416 |
| pcaec405.pcaac420                  | -0.000516527 | 0.078270616 | 0.9947442   |
| pcaec365.pcaac401                  | -1.09E-05    | 0.001672203 | 0.994823806 |
| smohc222.pcaec301                  | -0.000369337 | 0.056853717 | 0.994826216 |
| pcaec360.pcaac386                  | -0.000251659 | 0.038916404 | 0.994849796 |
| pcaec420.serotonin                 | -0.000487837 | 0.075448586 | 0.99485046  |
| pcaac366.pcaac383                  | -9.10E-05    | 0.014223219 | 0.994903845 |
| methioninesulfoxide.pcaac323       | 0.000737328  | 0.115279395 | 0.99490606  |

|                                    |              |             |             |
|------------------------------------|--------------|-------------|-------------|
| pcaec425.pcaec301                  | 0.000314643  | 0.050901077 | 0.995076929 |
| pcaac341.lysopcac161               | 0.000461673  | 0.074917413 | 0.995092096 |
| isoleucine.glutamicacid            | -0.00027641  | 0.045095723 | 0.995118393 |
| methionine.pcaac420                | -0.00025412  | 0.041892305 | 0.995168859 |
| pcaec381.pcaac401                  | 1.90E-05     | 0.00316824  | 0.995212716 |
| pcaec365.smc261                    | 0.000147358  | 0.024878867 | 0.995282747 |
| pcaac403.asparagine                | 8.41E-05     | 0.014456545 | 0.995368777 |
| pcaac381.spermidine                | 0.000299606  | 0.05152876  | 0.995369301 |
| pcaac341.pcaac401                  | 7.58E-06     | 0.001309448 | 0.9953867   |
| phenylalanine.c10                  | -0.000106352 | 0.018391293 | 0.99539446  |
| isoleucine.pcaac401                | -3.34E-06    | 0.000588077 | 0.995474493 |
| pcaec445.lysopcac181               | -0.000309894 | 0.055036987 | 0.995515607 |
| pcaec365.c10                       | -1.42E-05    | 0.002532449 | 0.995525215 |
| smohc141.pcaec423                  | -4.75E-05    | 0.008516213 | 0.995559579 |
| pcaec446.smc260                    | -0.000207396 | 0.037282972 | 0.995569676 |
| pcaac381.pcaac363                  | 0.000118757  | 0.021736984 | 0.995648834 |
| pcaac366.pcaac380                  | -0.000223132 | 0.041092542 | 0.995675417 |
| asparagine.isoleucine              | -0.000101221 | 0.018649982 | 0.995677493 |
| pcaec446.pcaec362                  | -6.94E-05    | 0.012892276 | 0.995711367 |
| pcaac406.serine                    | -0.000372477 | 0.069180388 | 0.995711929 |
| pcaec403.c10                       | 2.19E-05     | 0.004077584 | 0.995731768 |
| pcaec384.lysopcac280               | 4.03E-05     | 0.007576411 | 0.995768813 |
| phenylalanine.methionine           | -0.000153257 | 0.029822131 | 0.995907146 |
| lysopcac170.pcaec403               | 0.000163965  | 0.032050828 | 0.995925654 |
| smc181.pcaec301                    | -0.000302823 | 0.05936389  | 0.995937327 |
| c51.pcaac424                       | 3.34E-05     | 0.006605387 | 0.995968043 |
| pcaac366.pcaec386                  | -8.67E-05    | 0.017390092 | 0.99602845  |
| smohc222.pcaac401                  | 1.67E-05     | 0.003368454 | 0.996044992 |
| pcaec425.smc180                    | -3.79E-05    | 0.007844093 | 0.996147803 |
| pcaec422.asymmetricdimethylarginir | 8.52E-05     | 0.017857546 | 0.996198059 |
| serine.c8                          | -0.000197924 | 0.043288435 | 0.996358573 |
| pcaec363.methionine                | 0.000218607  | 0.050003524 | 0.99651816  |
| pcaac323.smc160                    | -0.000329051 | 0.075411445 | 0.996524864 |
| pcaac384.pcaac401                  | -8.34E-06    | 0.0019311   | 0.996562159 |
| pcaac424.c182                      | 0.000164123  | 0.038067326 | 0.996566302 |
| pcaac240.pcaac401                  | 1.52E-05     | 0.003562447 | 0.996610676 |
| c18.ornithine                      | -0.000102443 | 0.024504678 | 0.996670507 |
| creatinine.threonine               | 0.000127891  | 0.030631984 | 0.996674862 |
| kynurenine.pcaec423                | 6.15E-05     | 0.014965031 | 0.996726964 |
| c4.smc240                          | -0.000157335 | 0.039883962 | 0.996858237 |
| pcaac362.pcaac401                  | -1.11E-05    | 0.002840345 | 0.996898503 |
| h1.pcaec404                        | -9.46E-05    | 0.024611866 | 0.996939167 |
| leucine.acetylmithoine             | 0.000166403  | 0.043515966 | 0.996954494 |
| methionine.pcaec380                | 0.000141974  | 0.037279309 | 0.996966887 |
| pcaec361.pcaac360                  | -0.000252089 | 0.066514621 | 0.996981557 |

|                                    |              |             |             |
|------------------------------------|--------------|-------------|-------------|
| serine.methionine                  | -8.30E-05    | 0.022202238 | 0.997023471 |
| pcaec424.pcaac401                  | -8.07E-06    | 0.002192257 | 0.997067    |
| pcaec443.pcaec384                  | -6.19E-05    | 0.016895647 | 0.997083931 |
| leucine.pcaec404                   | 9.02E-05     | 0.024659916 | 0.997086501 |
| glutamicacid.pcaec404              | -0.000161817 | 0.044374711 | 0.997095737 |
| pcaac403.c10                       | 1.06E-05     | 0.002918176 | 0.997105462 |
| pcaec381.asymmetricdimethylarginir | 6.84E-05     | 0.018910808 | 0.997120186 |
| smc241.c162                        | 0.000240659  | 0.066642875 | 0.997123962 |
| arginine.pcaac342                  | -7.75E-05    | 0.02173441  | 0.99716109  |
| c4.pcaac385                        | -9.01E-05    | 0.025306613 | 0.997163841 |
| pcaac406.pcaac383                  | -2.93E-05    | 0.008390799 | 0.99722353  |
| c18.c12                            | 0.000139981  | 0.040369973 | 0.997238421 |
| pcaac422.pcaec341                  | 7.60E-05     | 0.021962301 | 0.997244778 |
| lysopcac182.c12                    | -0.000187289 | 0.05477299  | 0.997276714 |
| pcaac424.pcaac401                  | -1.21E-05    | 0.003562143 | 0.99729482  |
| pcaec422.pcaec365                  | -8.30E-05    | 0.025384031 | 0.997394404 |
| smohc241.pcaec423                  | -1.94E-05    | 0.005947739 | 0.997403307 |
| pcaec425.methioninesulfoxide       | -4.80E-05    | 0.015914196 | 0.997598738 |
| pcaec322.pcaac401                  | -5.73E-06    | 0.001932385 | 0.997638569 |
| pcaec300.smc241                    | -0.000169081 | 0.058166421 | 0.997684899 |
| methioninesulfoxide.pcaec342       | -0.000281113 | 0.098455188 | 0.997726006 |
| pcaec404.smohc241                  | -0.000174225 | 0.061341724 | 0.997737959 |
| c181.c3                            | -0.000106093 | 0.037446042 | 0.997743548 |
| pcaec405.pcaac401                  | 6.01E-06     | 0.002184291 | 0.997808762 |
| serotonin.pcaac321                 | 6.20E-05     | 0.022690702 | 0.99782419  |
| serotonin.arginine                 | -6.07E-05    | 0.022374974 | 0.997840711 |
| pcaec404.pcaac401                  | 6.32E-06     | 0.002362426 | 0.997869503 |
| alphaaminoadipicacid.pcaec401      | -0.00016801  | 0.063776336 | 0.997901923 |
| alanine.h1                         | -9.53E-06    | 0.003665405 | 0.997929338 |
| ornithine.c18                      | 0.000127723  | 0.049869672 | 0.997960236 |
| citruline.putrescine               | -7.60E-05    | 0.031970261 | 0.998107877 |
| pcaec403.taurine                   | -0.00012693  | 0.05365997  | 0.998116081 |
| pcaec381.c51dc                     | 0.000255133  | 0.108531665 | 0.99812778  |
| pcaac366.glutamicacid              | -0.000132338 | 0.05640044  | 0.998131256 |
| lysopcac280.pcaec365               | -4.30E-05    | 0.019564449 | 0.998250859 |
| pcaac420.phenylalanine             | 6.46E-05     | 0.030658165 | 0.998322672 |
| smc241.pcaac365                    | -9.47E-05    | 0.046284811 | 0.998369922 |
| pcaac425.pcaac401                  | 9.57E-06     | 0.005036599 | 0.998486554 |
| pcaec301.c51                       | 7.82E-05     | 0.041685352 | 0.998505869 |
| phenylalanine.pcaac401             | 2.39E-06     | 0.001276253 | 0.998507831 |
| c16.h1                             | 5.60E-06     | 0.003070315 | 0.99854839  |
| smohc241.c10                       | 2.60E-06     | 0.001446518 | 0.998570159 |
| pcaec321.pcaac401                  | -2.50E-06    | 0.001405012 | 0.998585124 |
| smc161.pcaac401                    | 3.01E-06     | 0.001719445 | 0.998607776 |
| c12.pcaac361                       | 4.79E-05     | 0.027539464 | 0.998615853 |



|                                    |              |             |             |
|------------------------------------|--------------|-------------|-------------|
| pcaec424.methioninesulfoxide       | 1.95E-05     | 0.011395936 | 0.998635095 |
| histidine.c51dc                    | -0.000155278 | 0.092381364 | 0.998661331 |
| pcaac343.c3                        | -0.000142523 | 0.085678653 | 0.998675168 |
| putrescine.pcaec322                | 5.68E-05     | 0.034860132 | 0.998702567 |
| lysopcac280.pcaac342               | 3.49E-05     | 0.0221975   | 0.998747791 |
| pcaac322.pcaac323                  | 5.84E-05     | 0.038981582 | 0.998807207 |
| pcaac344.valine                    | 7.18E-05     | 0.05015625  | 0.998859309 |
| pcaec364.asparticacid              | 6.65E-05     | 0.048061685 | 0.998897781 |
| pcaec405.pcaac363                  | -1.93E-05    | 0.014348479 | 0.998931165 |
| pcaec421.pcaec446                  | 7.12E-05     | 0.055068975 | 0.998970034 |
| lysopcac181.pcaec385               | 2.95E-05     | 0.023150448 | 0.998985908 |
| c12.smohc161                       | -9.81E-06    | 0.008355036 | 0.999064648 |
| pcaac361.methionine                | 3.29E-05     | 0.028078717 | 0.999066891 |
| pcaec386.putrescine                | 4.65E-05     | 0.041621725 | 0.999109886 |
| c16.pcaec421                       | -2.70E-06    | 0.002460125 | 0.999125237 |
| arginine.pcaac401                  | -1.37E-06    | 0.00127573  | 0.999146587 |
| pcaac401.c10                       | -2.30E-06    | 0.002185677 | 0.999163378 |
| lysopcac281.alanine                | 1.14E-05     | 0.011916327 | 0.999236238 |
| pcaec385.pcaec301                  | -5.78E-05    | 0.067385184 | 0.999316704 |
| pcaec423.glycine                   | -1.77E-05    | 0.021588713 | 0.999347762 |
| pcaec402.pcaac240                  | 8.69E-06     | 0.011156396 | 0.999379613 |
| smohc141.pcaec444                  | -7.41E-05    | 0.098446283 | 0.999400746 |
| pcaec423.c12                       | 3.17E-05     | 0.043006843 | 0.999413298 |
| smc181.c162                        | 6.96E-05     | 0.097250598 | 0.99943023  |
| pcaec363.asymmetricdimethylarginir | -2.49E-05    | 0.037917963 | 0.999476188 |
| arginine.lysopcac281               | 4.99E-06     | 0.007791123 | 0.999489936 |
| lysopcac160.pcaac401               | -1.06E-06    | 0.001718851 | 0.999509388 |
| pcaec364.pcaac401                  | 7.39E-07     | 0.001387124 | 0.999575729 |
| lysopcac160.smc202                 | 1.67E-05     | 0.031827457 | 0.999582355 |
| pcaec421.smc160                    | 2.53E-05     | 0.048781104 | 0.999587427 |
| prolinr.c51dc                      | 5.84E-05     | 0.118919973 | 0.999609027 |
| c2.pcaac321                        | 9.88E-06     | 0.020729806 | 0.999620306 |
| c142.putrescine                    | 7.44E-06     | 0.021989696 | 0.999730667 |
| pcaac380.c10                       | 6.18E-07     | 0.00218091  | 0.999774203 |
| pcaec404.c182                      | -7.32E-06    | 0.029444728 | 0.999801964 |
| c18.pcaac401                       | -2.90E-07    | 0.001462188 | 0.999842031 |
| c18.c51                            | 3.93E-06     | 0.032986943 | 0.999905036 |
| c51.pcaec386                       | -8.76E-07    | 0.010396339 | 0.999932895 |

Supplementary Table 2. Associations between the percentage of the medial cartilage volume loss and each of the metabolite ratios

| <b>Metabolite ratios</b>     | <b>Beta</b>  | <b>Std. Error</b> | <b>Pr(&gt; t )</b> |
|------------------------------|--------------|-------------------|--------------------|
| pcaec321.pcaec405            | 0.302519002  | 0.069397412       | 2.54E-05           |
| pcaec322.pcaec405            | 0.205934731  | 0.049220712       | 5.09E-05           |
| pcaac420.pcaec405            | 0.25811661   | 0.061894355       | 5.37E-05           |
| pcaec341.pcaec405            | 0.17959897   | 0.043240085       | 5.73E-05           |
| methioninesulfoxide.pcaac342 | 0.147306711  | 0.037263053       | 0.000123061        |
| c181.pcaac342                | -0.024209001 | 0.006271614       | 0.000173965        |
| lysopcac280.pcaac342         | 0.108143804  | 0.028056834       | 0.000177617        |
| pcaec422.pcaac342            | 0.06794374   | 0.017716006       | 0.000190681        |
| c18.pcaac342                 | -0.062114018 | 0.016210641       | 0.000193132        |
| pcaec300.pcaac342            | 0.062948912  | 0.016846733       | 0.000272965        |
| pcaac424.pcaec405            | -0.426528023 | 0.114956359       | 0.000299953        |
| pcaec420.pcaac342            | 0.080496243  | 0.021870132       | 0.000333572        |
| pcaac422.pcaac342            | 0.06741439   | 0.018411801       | 0.000357132        |
| pcaec340.pcaec405            | 0.265525396  | 0.07272787        | 0.000370739        |
| pcaac386.pcaac342            | 0.085750855  | 0.023607982       | 0.000396057        |
| pcaec445.pcaec405            | 0.136071156  | 0.037485646       | 0.000399328        |
| citruline.pcaac342           | 0.019275855  | 0.005317748       | 0.000406637        |
| c51dc.pcaec405               | 0.157785356  | 0.043541505       | 0.000408108        |
| pcaac323.pcaac342            | -0.034909173 | 0.009635174       | 0.000409109        |
| pcaec342.pcaec405            | 0.204543447  | 0.056538502       | 0.000416861        |
| c51.pcaac342                 | 0.073531376  | 0.02033503        | 0.000419478        |
| pcaac403.pcaac342            | 0.073256497  | 0.020282027       | 0.000425582        |
| phenylalanine.pcaac342       | 0.021290039  | 0.005900006       | 0.000430725        |
| pcaec446.pcaec405            | 0.142270081  | 0.039562536       | 0.000449895        |
| smohc222.pcaec405            | 0.094089031  | 0.026216884       | 0.000461411        |
| pcaec380.pcaac342            | 0.026114191  | 0.007303924       | 0.000483738        |
| pcaac300.pcaac342            | 0.019944958  | 0.005600594       | 0.000508205        |
| pcaac321.pcaac342            | 0.040184491  | 0.011285998       | 0.000509375        |
| pcaac361.pcaac342            | 0.028338686  | 0.007970923       | 0.000518869        |
| pcaac406.pcaac342            | 0.044030148  | 0.012387217       | 0.00052027         |
| c8.asparticacid              | 0.099676283  | 0.028104893       | 0.000534759        |
| pcaac365.pcaac342            | 0.013535064  | 0.003818707       | 0.000538806        |
| pcaac360.pcaac342            | 0.038327377  | 0.010814114       | 0.0005392          |
| pcaac343.pcaac342            | 0.032691456  | 0.009225017       | 0.000539981        |
| smc241.pcaec405              | 0.093868184  | 0.026501953       | 0.000543456        |
| pcaac421.pcaec405            | 0.314922321  | 0.088937913       | 0.000545367        |
| c14.pcaac342                 | -0.012533664 | 0.00354191        | 0.00054964         |
| c141oh.pcaac342              | -0.023796118 | 0.006728457       | 0.000553533        |
| c142.pcaac342                | -0.008215831 | 0.00232448        | 0.000557686        |
| isoleucine.pcaec405          | -0.230768265 | 0.065309518       | 0.000559672        |
| leucine.pcaac342             | 0.016220132  | 0.004593363       | 0.000564041        |
| creatinine.c18               | -0.120097741 | 0.034031613       | 0.000568363        |

|                           |              |             |             |
|---------------------------|--------------|-------------|-------------|
| smc161.pcaec405           | 0.105090885  | 0.029780672 | 0.000568711 |
| pcaac366.pcaac342         | 0.013041919  | 0.003700085 | 0.00057677  |
| pcaac424.pcaac342         | 0.025088869  | 0.007120659 | 0.000579509 |
| pcaac426.pcaac342         | 0.014771387  | 0.004197907 | 0.000588878 |
| pcaec362.pcaec405         | 0.141146325  | 0.040126693 | 0.000591392 |
| pcaac341.pcaac342         | 0.076599722  | 0.02178282  | 0.000593432 |
| pcaac402.pcaac342         | 0.027664858  | 0.007895861 | 0.000620217 |
| c12.pcaac342              | -0.008123622 | 0.002321653 | 0.000630219 |
| c2.pcaac342               | -0.018696112 | 0.005348497 | 0.00063782  |
| pcaac425.pcaac342         | 0.022580488  | 0.006477797 | 0.000659548 |
| c162.pcaac342             | -0.005754372 | 0.001654803 | 0.000678937 |
| isoleucine.pcaac342       | 0.0165474    | 0.004762365 | 0.000685379 |
| pcaac405.pcaac342         | 0.016385703  | 0.004718467 | 0.000689953 |
| smc261.pcaec405           | 0.096238496  | 0.027730118 | 0.000695009 |
| pcaac404.pcaac342         | 0.021487722  | 0.006191627 | 0.000695228 |
| lysopcac180.pcaac342      | 0.018947123  | 0.005461112 | 0.000697576 |
| pcaec401.pcaac342         | 0.022597296  | 0.006523041 | 0.000710169 |
| c101.pcaac342             | -0.006226747 | 0.001799014 | 0.000717548 |
| c141.pcaac342             | -0.006533858 | 0.001888406 | 0.000720526 |
| pcaec381.pcaac342         | 0.053305575  | 0.015412762 | 0.000724104 |
| pcaec421.pcaac342         | 0.050069728  | 0.014478135 | 0.000724685 |
| lysopcac140.pcaac342      | 0.008379378  | 0.002423479 | 0.000726462 |
| smc202.pcaac342           | -0.005262222 | 0.001522274 | 0.000728362 |
| glutamicacid.pcaec405     | -0.242544199 | 0.070186572 | 0.000731123 |
| pcaac384.pcaec340         | 0.228686178  | 0.066195765 | 0.000733648 |
| pcaec382.pcaac342         | 0.099741607  | 0.028874914 | 0.000734725 |
| pcaec384.pcaac342         | -0.039140463 | 0.011336757 | 0.000739089 |
| leucine.pcaec405          | -0.214471845 | 0.062162879 | 0.000745074 |
| pcaec402.pcaec405         | 0.298327169  | 0.086543313 | 0.000752766 |
| pcaac344.pcaac342         | 0.010303348  | 0.002994224 | 0.000768465 |
| lysopcac203.pcaac342      | 0.014605878  | 0.004245268 | 0.000769947 |
| acetylmethionine.pcaac342 | 0.01649448   | 0.004795393 | 0.000772191 |
| lysopcac160.pcaac342      | 0.016519762  | 0.004805371 | 0.000777142 |
| glutamicacid.pcaac342     | 0.016139855  | 0.004697557 | 0.000782367 |
| ornithine.pcaac342        | 0.016676237  | 0.004862279 | 0.000798679 |
| pcaac322.pcaac342         | 0.01278309   | 0.003728448 | 0.000801902 |
| pcaac240.pcaac342         | 0.024043391  | 0.007013478 | 0.000802879 |
| pcaac385.pcaac342         | 0.016443078  | 0.004803816 | 0.000817287 |
| c10.pcaac342              | -0.002181692 | 0.000637793 | 0.000823487 |
| c8.pcaac342               | -0.002359899 | 0.000690667 | 0.000834281 |
| smc160.pcaec405           | 0.101655148  | 0.02975888  | 0.000836764 |
| pcaec444.pcaec405         | 0.185325286  | 0.054328949 | 0.000850421 |
| smc181.pcaac342           | -0.00561549  | 0.001648133 | 0.000861951 |

|                               |              |             |             |
|-------------------------------|--------------|-------------|-------------|
| pcaec301.pcaac342             | 0.014126763  | 0.004150486 | 0.000872311 |
| alphaaminoadipicacid.pcaac342 | 0.008536588  | 0.002510567 | 0.000882302 |
| lysopcac182.pcaac342          | 0.018782042  | 0.005524738 | 0.000884197 |
| pcaec445.pcaac342             | -0.008726378 | 0.002567658 | 0.000887333 |
| c10.pcaec405                  | 0.040492028  | 0.011928431 | 0.000899348 |
| pcaec363.pcaac342             | -0.024557032 | 0.007236323 | 0.000902388 |
| smc161.pcaac342               | -0.005702969 | 0.00168425  | 0.000925496 |
| smohc241.pcaec405             | 0.122625855  | 0.036246438 | 0.000934696 |
| c51dc.pcaac342                | -0.009187703 | 0.002718728 | 0.000946384 |
| lysopcac181.pcaac342          | 0.031129208  | 0.009216486 | 0.000952293 |
| c102.pcaac342                 | 0.070261273  | 0.020861064 | 0.00098309  |
| pcaec425.pcaac342             | -0.029021418 | 0.008622784 | 0.000990988 |
| smohc141.pcaac342             | -0.005002874 | 0.001486489 | 0.000991326 |
| smc180.pcaac342               | -0.005983325 | 0.001778457 | 0.000995411 |
| smohc161.pcaac342             | -0.005285639 | 0.001571494 | 0.00099837  |
| alanine.pcaac342              | 0.011231085  | 0.00333916  | 0.000998374 |
| pcaec386.pcaac342             | 0.097798941  | 0.029092542 | 0.001004389 |
| smc160.pcaac342               | -0.005687448 | 0.00169245  | 0.001008315 |
| pcaec365.pcaac342             | 0.054015923  | 0.016075794 | 0.001009679 |
| pcaec362.pcaac342             | -0.008347605 | 0.002484452 | 0.00101015  |
| c4.pcaac342                   | -0.007253462 | 0.002159318 | 0.001012831 |
| pcaac364.pcaac342             | 0.020391827  | 0.006072705 | 0.001016891 |
| pcaec446.pcaac342             | -0.009632558 | 0.002870066 | 0.001022794 |
| pcaac384.pcaac342             | 0.026190298  | 0.007806596 | 0.001027314 |
| pcaec322.pcaac342             | -0.00993963  | 0.002962871 | 0.001027876 |
| glutamicacid.smohc221         | -0.444476236 | 0.132515519 | 0.001029884 |
| arginine.pcaac342             | 0.093172262  | 0.027805737 | 0.00104134  |
| pcaec444.pcaac342             | -0.014840447 | 0.004429296 | 0.001042411 |
| smc241.pcaac342               | -0.004897062 | 0.001462431 | 0.001049188 |
| h1.pcaac342                   | 0.023964666  | 0.007157208 | 0.001050065 |
| lysopcac161.pcaac342          | 0.028006871  | 0.008367227 | 0.001053976 |
| smohc222.pcaac342             | -0.004825136 | 0.001442492 | 0.00106177  |
| smc261.pcaac342               | -0.00519217  | 0.001552317 | 0.001062521 |
| lysine.pcaac342               | 0.014926026  | 0.004462554 | 0.001062731 |
| pcaec341.pcaac342             | -0.008935221 | 0.002674078 | 0.001074495 |
| serotonin.pcaac342            | -0.012650363 | 0.003786263 | 0.001075567 |
| smohc241.pcaac342             | -0.008190334 | 0.002452523 | 0.001081189 |
| lysopcac204.pcaac342          | 0.014981143  | 0.004486292 | 0.00108205  |
| pcaac420.pcaac342             | -0.014710348 | 0.004406281 | 0.001085005 |
| pcaec342.pcaac342             | -0.014737506 | 0.004417199 | 0.001092621 |
| pcaec343.pcaac342             | -0.031384606 | 0.009424723 | 0.00111596  |
| creatinine.pcaac342           | 0.015560575  | 0.004676469 | 0.001125669 |
| smc260.pcaac342               | -0.006981779 | 0.002102704 | 0.001152244 |

|                                |              |             |             |
|--------------------------------|--------------|-------------|-------------|
| pcaec406.pcaac342              | -0.021721579 | 0.006543174 | 0.00115473  |
| prolinr.pcaac342               | 0.024059165  | 0.007250693 | 0.001160645 |
| pcaec322.pcaac365              | 0.138303991  | 0.041714536 | 0.001171072 |
| pcaac401.pcaac342              | 0.090289986  | 0.027237115 | 0.00117311  |
| pcaec403.pcaac342              | 0.131459733  | 0.039718135 | 0.001193242 |
| c5.pcaac342                    | 0.032747713  | 0.009904975 | 0.001207631 |
| smohc141.pcaec405              | 0.088842962  | 0.026944644 | 0.001243818 |
| c8.pcaec405                    | 0.042501449  | 0.012906553 | 0.001261261 |
| asparagine.pcaac342            | 0.016955205  | 0.005153655 | 0.001274095 |
| pcaec321.pcaac365              | 0.093164812  | 0.028336156 | 0.001282911 |
| lysopcac182.c182               | -0.363581885 | 0.110655379 | 0.001291923 |
| pcaec385.pcaac342              | -0.116717715 | 0.035533852 | 0.001296275 |
| histidine.pcaac342             | 0.013011668  | 0.003966524 | 0.001314808 |
| pcaec343.pcaec405              | 0.237951015  | 0.072729132 | 0.001352556 |
| c3.pcaac342                    | 0.035930108  | 0.011018098 | 0.001400937 |
| alphaaminoadipicacid.pcaec405  | -0.114877106 | 0.035276741 | 0.001421942 |
| serine.pcaac342                | -0.022738318 | 0.006992435 | 0.001443503 |
| pcaec423.pcaac342              | -0.016557078 | 0.005103297 | 0.001479033 |
| smc260.pcaec405                | 0.110117562  | 0.034020822 | 0.001516172 |
| pcaac281.pcaac342              | -0.015974923 | 0.004949274 | 0.00156136  |
| pcaec321.pcaac342              | -0.018506934 | 0.005738302 | 0.001574445 |
| c14.c142                       | -0.275872525 | 0.085608442 | 0.00158812  |
| c18.c142                       | -0.152677319 | 0.047479537 | 0.001623742 |
| c141oh.c142                    | -0.180346968 | 0.056172542 | 0.001650516 |
| glycine.pcaac342               | -0.022985491 | 0.007161757 | 0.001656465 |
| pcaec364.pcaac342              | 0.035972185  | 0.011214848 | 0.001666812 |
| c182.c142                      | -0.19080834  | 0.059536646 | 0.0016812   |
| c142.smc202                    | -0.163170342 | 0.050916264 | 0.001682334 |
| pcaec406.pcaec405              | 0.261162891  | 0.081505522 | 0.001684751 |
| pcaac385.pcaec340              | 0.253286891  | 0.079171    | 0.001712139 |
| putrescine.pcaac342            | 0.0188411    | 0.005901783 | 0.001750053 |
| pcaec423.pcaec405              | 0.207807032  | 0.065131026 | 0.001760462 |
| smohc161.pcaec405              | 0.090069593  | 0.028242417 | 0.001768636 |
| c181.c142                      | -0.137288868 | 0.043134076 | 0.001804945 |
| smc181.pcaec405                | 0.09460306   | 0.029730834 | 0.001809912 |
| smohc221.pcaac342              | -0.0131061   | 0.004119759 | 0.001814026 |
| pcaec340.pcaac342              | -0.020125137 | 0.006357002 | 0.001906186 |
| pcaac421.pcaac342              | -0.025442716 | 0.008037333 | 0.001907744 |
| smc202.pcaec405                | 0.085133717  | 0.026933863 | 0.001936788 |
| pcaec402.pcaac342              | -0.019485616 | 0.006208551 | 0.002079728 |
| asymmetricdimethylarginine.pca | 0.240256132  | 0.076587861 | 0.002089756 |
| pcaec443.pcaac342              | -0.047414615 | 0.01514731  | 0.002135167 |
| pcaac320.pcaac365              | 0.088008527  | 0.028129201 | 0.002145416 |

|                                |              |             |             |
|--------------------------------|--------------|-------------|-------------|
| asymmetricdimethylarginine.pca | -0.060388887 | 0.019345645 | 0.002194606 |
| pcaac281.pcaec405              | 0.195345552  | 0.062811631 | 0.002276309 |
| methionine.pcaac342            | 0.069708627  | 0.022430849 | 0.002292977 |
| serine.c18                     | 0.176926993  | 0.056939753 | 0.002296206 |
| pcaac362.pcaac342              | 0.151706165  | 0.048829667 | 0.002299271 |
| pcaec363.c12                   | 0.219377989  | 0.070618529 | 0.002301613 |
| asymmetricdimethylarginine.c16 | 0.085703459  | 0.02770088  | 0.002395116 |
| pcaec361.pcaac342              | -0.026302094 | 0.008511342 | 0.00242277  |
| pcaac383.pcaac342              | -0.038416679 | 0.012525974 | 0.00260628  |
| lysopcac281.pcaec405           | 0.31105166   | 0.101822041 | 0.002706706 |
| c4.c182                        | 0.136345984  | 0.044800127 | 0.002804776 |
| c16.c142                       | -0.288916285 | 0.095062205 | 0.002841588 |
| c162.smohc221                  | -0.214576065 | 0.070843206 | 0.002934313 |
| lysopcac170.pcaac342           | -0.03882812  | 0.012845598 | 0.002991276 |
| pcaec404.pcaac342              | 0.151191905  | 0.050105016 | 0.003039575 |
| lysopcac180.pcaec405           | -0.14170388  | 0.046970993 | 0.003045803 |
| kynurenine.c142                | -0.209861501 | 0.069583209 | 0.003053899 |
| lysopcac203.pcaec405           | -0.153089095 | 0.050920578 | 0.003145252 |
| smc180.pcaec405                | 0.092989403  | 0.030945558 | 0.003159764 |
| smc240.pcaac342                | -0.025392506 | 0.008480566 | 0.003265913 |
| c101.c18                       | -0.107806426 | 0.036008754 | 0.003268969 |
| lysopcac181.smc160             | -0.232452627 | 0.077711259 | 0.003295795 |
| c16.pcaac342                   | 0.046614     | 0.01559725  | 0.003322529 |
| histidine.pcaec405             | -0.150787637 | 0.050663056 | 0.003450381 |
| lysopcac281.pcaec365           | 0.077585669  | 0.026083058 | 0.003468609 |
| arginine.smohc221              | 0.224170774  | 0.075580698 | 0.003560782 |
| pcaec404.pcaac402              | -0.446074989 | 0.150709377 | 0.003628137 |
| pcaac405.c142                  | -0.145424259 | 0.049324145 | 0.003757349 |
| prolinr.transhydroxyproline    | -0.12288662  | 0.041710182 | 0.003781817 |
| pcaac281.c12                   | 0.186530699  | 0.06337323  | 0.003814509 |
| pcaec300.pcaac402              | -0.199354444 | 0.067835877 | 0.003868017 |
| c101.c12                       | 0.137255841  | 0.046711944 | 0.003873066 |
| pcaac320.pcaac342              | -0.047573233 | 0.016256927 | 0.004016471 |
| c141.pcaec405                  | 0.097898741  | 0.03349245  | 0.004057048 |
| phenylalanine.c5               | -0.103945324 | 0.035580858 | 0.004077017 |
| c10.asparticacid               | 0.079560734  | 0.027257984 | 0.00410887  |
| pcaec383.pcaac342              | -0.063941179 | 0.021941281 | 0.004166379 |
| pcaac320.pcaec405              | 0.21087895   | 0.072436155 | 0.004203654 |
| c8.smc202                      | -0.168466175 | 0.057942618 | 0.004251668 |
| kynurenine.c18                 | -0.113716119 | 0.039130247 | 0.004269267 |
| pcaac381.c12                   | 0.176116432  | 0.060822914 | 0.00440648  |
| pcaec321.c12                   | 0.137833509  | 0.047619576 | 0.004420896 |
| pcaec425.pcaec405              | 0.323146488  | 0.111743893 | 0.004455788 |

|                               |              |             |             |
|-------------------------------|--------------|-------------|-------------|
| smohc221.pcaac362             | 0.139827266  | 0.048515851 | 0.004587805 |
| lysopcac203.c182              | -0.138050461 | 0.047925975 | 0.004609811 |
| pcaac342.pcaec365             | 0.083078125  | 0.028874393 | 0.004655039 |
| alanine.pcaec405              | -0.115491009 | 0.040343534 | 0.004861131 |
| serine.smc240                 | -0.171397104 | 0.059932774 | 0.004902751 |
| pcaac380.pcaac342             | -0.061217176 | 0.021408705 | 0.004908146 |
| pcaec364.pcaec340             | 0.234337952  | 0.082153452 | 0.005011405 |
| lysopcac281.pcaac342          | -0.035533303 | 0.012496072 | 0.00514511  |
| c18.pcaec383                  | 0.292714127  | 0.103047557 | 0.005190754 |
| methioninesulfoxide.glutamine | 0.105425989  | 0.037190867 | 0.005281219 |
| pcaac341.pcaec365             | 0.08678175   | 0.030619347 | 0.005289259 |
| citruline.c18                 | -0.078453699 | 0.027722891 | 0.005356631 |
| prolinr.pcaac405              | -0.165417177 | 0.058690385 | 0.005540438 |
| alanine.c16                   | -0.103817529 | 0.036855918 | 0.005566949 |
| c8.c51                        | 0.250666784  | 0.089273146 | 0.005715798 |
| creatinine.pcaec384           | 0.207959413  | 0.074066909 | 0.005718138 |
| kynurenine.c16                | -0.096921689 | 0.0345693   | 0.005786115 |
| pcaec385.pcaec340             | 0.09535011   | 0.034051346 | 0.005845842 |
| pcaac321.c18                  | 0.152127948  | 0.054531257 | 0.006027153 |
| lysopcac280.c14               | 0.116116961  | 0.041661152 | 0.006072399 |
| lysopcac181.pcaac426          | -0.206686391 | 0.074339429 | 0.006195223 |
| creatinine.pcaec360           | 0.007809734  | 0.002841448 | 0.006793801 |
| putrescine.pcaac426           | -0.139879539 | 0.051063675 | 0.006976295 |
| lysopcac181.lysine            | 0.232953783  | 0.085062007 | 0.006989995 |
| c10.c51                       | 0.196836376  | 0.07193972  | 0.007040612 |
| pcaec361.pcaec405             | 0.269366772  | 0.09858513  | 0.007118069 |
| c142.c12                      | 0.293813157  | 0.107756497 | 0.007235344 |
| c101.pcaec405                 | 0.075344354  | 0.027691201 | 0.007355973 |
| creatinine.c16                | -0.0568974   | 0.020934815 | 0.007420357 |
| c4.pcaec443                   | -0.120131581 | 0.044216877 | 0.007440887 |
| pcaec420.lysine               | 0.220640717  | 0.081245832 | 0.007465523 |
| c5.pcaec405                   | -0.210569423 | 0.077539166 | 0.007466911 |
| c10.c182                      | 0.110025483  | 0.040525969 | 0.007482203 |
| smohc221.pcaec405             | 0.13892534   | 0.051236725 | 0.007557444 |
| pcaac321.c14                  | 0.189433956  | 0.069892452 | 0.007580755 |
| pcaac343.pcaec405             | 0.116993388  | 0.04339846  | 0.007902511 |
| pcaec341.pcaec365             | 0.054351536  | 0.020204331 | 0.008031793 |
| alanine.c5                    | -0.051917455 | 0.019314617 | 0.008080011 |
| lysopcac140.pcaec405          | -0.093115416 | 0.034751967 | 0.008278721 |
| pcaec361.c12                  | 0.161644175  | 0.060449992 | 0.008406684 |
| pcaec340.c141oh               | -0.305121706 | 0.114160027 | 0.008436732 |
| pcaac322.pcaac381             | 0.196916078  | 0.073679883 | 0.00844067  |
| pcaec420.pcaac426             | -0.133422748 | 0.04994767  | 0.008472705 |

|                                |              |             |             |
|--------------------------------|--------------|-------------|-------------|
| smohc141.smc202                | 0.227493902  | 0.085268863 | 0.008551916 |
| methioninesulfoxide.c18        | 0.201133435  | 0.075419077 | 0.008578116 |
| prolinr.c142                   | -0.235968777 | 0.088765552 | 0.008787389 |
| c8.smohc221                    | -0.173095885 | 0.065174457 | 0.008848319 |
| pcaec381.pcaec402              | -0.303544882 | 0.114354431 | 0.008884872 |
| pcaec443.glutamine             | 0.037863895  | 0.014269584 | 0.008908745 |
| c162.pcaec385                  | -0.171543978 | 0.06469599  | 0.008957248 |
| pcaec383.glutamine             | 0.045591447  | 0.017237656 | 0.009126652 |
| h1.c142                        | -0.12353854  | 0.046748849 | 0.009185122 |
| c12.pcaec405                   | 0.10069521   | 0.038144166 | 0.009256061 |
| pcaac300.c18                   | 0.105656325  | 0.04004365  | 0.009290647 |
| smohc222.c12                   | 0.148248588  | 0.056235012 | 0.009350628 |
| smohc222.pcaec443              | -0.232260468 | 0.088131628 | 0.009372958 |
| pcaac403.glutamine             | 0.056566027  | 0.021507202 | 0.009512648 |
| lysopcac140.smc240             | -0.203376164 | 0.077357099 | 0.009540378 |
| lysopcac181.c182               | -0.158904173 | 0.060591167 | 0.009715034 |
| c8.c18                         | -0.087576392 | 0.033403442 | 0.009736366 |
| pcaec382.c18                   | 0.172268321  | 0.065830072 | 0.009870721 |
| pcaec363.pcaec405              | 0.17224798   | 0.065860787 | 0.009912874 |
| pcaec364.pcaec322              | 0.3857027    | 0.147638236 | 0.009991843 |
| pcaec343.c12                   | 0.199161077  | 0.076378682 | 0.010130022 |
| pcaec401.leucine               | -0.163431736 | 0.062684362 | 0.010139346 |
| pcaac362.c12                   | 0.190638222  | 0.073272454 | 0.010293859 |
| pcaac322.c5                    | 0.037687175  | 0.014505367 | 0.010397702 |
| pcaec381.c18                   | 0.152588967  | 0.058806788 | 0.010496223 |
| pcaac281.smohc222              | -0.019687091 | 0.007600272 | 0.010625943 |
| pcaec386.pcaec340              | 0.191443945  | 0.07392096  | 0.010639694 |
| c141oh.smohc222                | 0.030693083  | 0.011882931 | 0.010844259 |
| pcaec340.pcaec365              | 0.052561465  | 0.020359945 | 0.010884574 |
| pcaac342.glutamine             | 0.030124577  | 0.011671357 | 0.010900881 |
| pcaec424.glutamine             | 0.036379026  | 0.014100166 | 0.010931796 |
| pcaec361.pcaec365              | 0.057294444  | 0.022221661 | 0.010983999 |
| pcaac365.c12                   | 0.17595435   | 0.06825942  | 0.011001736 |
| pcaec403.c18                   | 0.162303582  | 0.062992744 | 0.011037756 |
| c162.pcaec360                  | -0.026955023 | 0.010462832 | 0.011046265 |
| citruline.smc202               | -0.118838407 | 0.046132859 | 0.011054211 |
| asymmetricdimethylarginine.c51 | -0.303644309 | 0.118024479 | 0.011154541 |
| lysopcac140.smc202             | 0.095835414  | 0.037254316 | 0.011162478 |
| prolinr.c16                    | -0.073942213 | 0.02876727  | 0.011227352 |
| pcaec342.c12                   | 0.145612896  | 0.056717713 | 0.011321371 |
| pcaac300.smc240                | -0.17680486  | 0.06886841  | 0.011322657 |
| pcaec382.glutamine             | 0.041797753  | 0.016283205 | 0.011333902 |
| acetylorithoine.c8             | -0.16240628  | 0.0632935   | 0.011365114 |



|                       |              |             |             |
|-----------------------|--------------|-------------|-------------|
| pcaac321.pcaac382     | 0.042345504  | 0.016512375 | 0.011410561 |
| pcaec403.glutamine    | 0.050541458  | 0.0197133   | 0.011430808 |
| asparagine.spermidine | -0.170654766 | 0.066565933 | 0.011434892 |
| glutamine.pcaac342    | 0.062711897  | 0.024511257 | 0.011599274 |
| pcaec301.smc202       | 0.10599006   | 0.041443884 | 0.011632977 |
| smohc141.c12          | 0.181425041  | 0.071004556 | 0.011707079 |
| pcaac323.glutamine    | 0.036579271  | 0.014318219 | 0.011719343 |
| pcaac384.c12          | 0.157922059  | 0.061843938 | 0.011757227 |
| pcaec423.pcaac342     | 0.300036581  | 0.117504207 | 0.011761937 |
| pcaac426.c12          | 0.138540568  | 0.054299926 | 0.011827031 |
| pcaec425.glutamine    | 0.033122654  | 0.012982631 | 0.011829941 |
| pcaac385.pcaac445     | 0.134304235  | 0.052680185 | 0.011890916 |
| histidine.pcaec402    | -0.098428467 | 0.038613427 | 0.011902382 |
| lysopcac161.c182      | -0.138327472 | 0.05431603  | 0.011979363 |
| pcaac404.c182         | -0.081950028 | 0.032220738 | 0.012088549 |
| c10.c12               | 0.267003966  | 0.105063281 | 0.012155737 |
| lysopcac170.smohc222  | 0.035993767  | 0.014164576 | 0.012164093 |
| pcaec322.c12          | 0.111549329  | 0.043921208 | 0.012209021 |
| pcaac383.smc202       | 0.09406456   | 0.037046714 | 0.012231696 |
| pcaac361.c12          | 0.18529796   | 0.073109484 | 0.012384402 |
| pcaec423.glutamine    | 0.03286473   | 0.012984493 | 0.012501312 |
| pcaec361.glutamine    | 0.029559976  | 0.011692662 | 0.01260359  |
| c18.smohc221          | -0.178573151 | 0.070641017 | 0.012609868 |
| pcaac300.c5           | 0.035276411  | 0.013962133 | 0.012655141 |
| pcaac343.glutamine    | 0.02423035   | 0.009590672 | 0.012659539 |
| smohc222.c16          | 0.106829161  | 0.042284665 | 0.012660281 |
| pcaac321.lysopcac203  | 0.05289312   | 0.0209396   | 0.01267552  |
| pcaac361.smc160       | -0.241888319 | 0.095812781 | 0.012723531 |
| pcaec384.pcaec365     | 0.071508536  | 0.028326665 | 0.012729359 |
| pcaac281.smc202       | 0.106772467  | 0.042300606 | 0.01273936  |
| pcaec340.smc202       | 0.114754557  | 0.045477592 | 0.012767572 |
| c51dc.smohc222        | -0.020798839 | 0.008261938 | 0.012973267 |
| creatinine.c12        | -0.056555568 | 0.022472434 | 0.013000178 |
| pcaac402.pcaec405     | -0.28229305  | 0.112384201 | 0.013170495 |
| pcaac384.pcaec445     | 0.139786128  | 0.055656737 | 0.013180512 |
| pcaac383.glutamine    | 0.031845216  | 0.012680326 | 0.013187227 |
| prolinr.pcaec405      | -0.185851889 | 0.074086657 | 0.013287947 |
| c10.pcaec381          | 0.100122587  | 0.039916846 | 0.01329856  |
| c10.smc202            | -0.13571352  | 0.054111843 | 0.013307917 |
| pcaac322.glutamine    | 0.048643471  | 0.019416381 | 0.013406759 |
| lysopcac161.glutamine | 0.028262657  | 0.011301585 | 0.013570977 |
| pcaac381.glutamine    | 0.041132595  | 0.016466984 | 0.013677004 |
| citruline.c14         | -0.091780517 | 0.036770198 | 0.01374444  |

|                       |              |             |             |
|-----------------------|--------------|-------------|-------------|
| pcaec321.glutamine    | 0.039982312  | 0.016023836 | 0.013777048 |
| smc181.pcaec381       | 0.088462599  | 0.03546759  | 0.013814047 |
| smc180.pcaec362       | 0.113322169  | 0.045487643 | 0.013922556 |
| c16.smohc221          | -0.22116245  | 0.088790627 | 0.013939143 |
| pcaac365.glutamine    | 0.025556289  | 0.010260692 | 0.013944117 |
| pcaec444.glutamine    | 0.026689173  | 0.010732742 | 0.014094561 |
| pcaac366.glutamine    | 0.030316876  | 0.01219429  | 0.014115494 |
| smc161.smohc222       | -0.034459406 | 0.013869372 | 0.014175694 |
| pcaac386.c12          | 0.131001512  | 0.052728727 | 0.014180476 |
| pcaec343.pcaec365     | 0.079956989  | 0.032188052 | 0.014195134 |
| pcaec361.smohc222     | -0.031634324 | 0.012736838 | 0.014209265 |
| pcaac385.c12          | 0.142510669  | 0.057380436 | 0.014212185 |
| lysopcac280.c181      | -0.115365097 | 0.046470054 | 0.014251988 |
| citruline.pcaec360    | 0.018419049  | 0.007420928 | 0.014272174 |
| pcaac363.glutamine    | 0.022109759  | 0.008910501 | 0.014300003 |
| c162.asparticacid     | 0.051277932  | 0.020691079 | 0.014417487 |
| pcaac402.glutamine    | 0.043126269  | 0.017414743 | 0.01448873  |
| pcaec404.glutamine    | 0.033050853  | 0.013359798 | 0.014586785 |
| c10.phenylalanine     | 0.124337026  | 0.050297576 | 0.014660167 |
| pcaec363.pcaec360     | -0.017297491 | 0.006999213 | 0.014686866 |
| pcaec340.smohc222     | -0.01429462  | 0.00578827  | 0.01475629  |
| kynurenine.pcaec365   | -0.060800923 | 0.024652643 | 0.014886158 |
| pcaec380.glutamine    | 0.031117108  | 0.012619782 | 0.014908591 |
| c141.asparticacid     | 0.08865499   | 0.035957569 | 0.014916391 |
| pcaec421.glutamine    | 0.02703564   | 0.010972326 | 0.014978635 |
| pcaec381.glutamine    | 0.041231589  | 0.016737312 | 0.014999877 |
| serine.c12            | 0.158957617  | 0.064553524 | 0.015041457 |
| pcaac365.pcaac405     | 0.252644061  | 0.102776063 | 0.015211473 |
| smohc222.pcaec385     | -0.147161407 | 0.05987249  | 0.01522306  |
| smc180.pcaec365       | 0.111042895  | 0.04518316  | 0.015235099 |
| pcaac422.glutamine    | 0.034424358  | 0.014010816 | 0.015260777 |
| pcaac343.c5           | 0.03439628   | 0.014018465 | 0.015397205 |
| lysopcac160.glutamine | 0.026389157  | 0.010756121 | 0.015406744 |
| pcaac424.glutamine    | 0.0376612    | 0.015363767 | 0.015493375 |
| arginine.c182         | -0.080686127 | 0.032915918 | 0.0154942   |
| c142.smohc222         | 0.012287252  | 0.005013898 | 0.015520638 |
| pcaac363.c12          | 0.119714539  | 0.048860371 | 0.015541398 |
| glycine.lysopcac203   | -0.092678358 | 0.037859068 | 0.015630542 |
| ornithine.pcaec405    | -0.142853672 | 0.058356944 | 0.015632776 |
| pcaec343.glutamine    | 0.037878871  | 0.01547486  | 0.015639464 |
| pcaac406.c141oh       | -0.206370211 | 0.084327782 | 0.015661473 |
| pcaac380.pcaec405     | 0.19818914   | 0.081000696 | 0.015681457 |
| lysopcac180.smohc222  | 0.015218054  | 0.00622253  | 0.015728194 |

|                                |              |             |             |
|--------------------------------|--------------|-------------|-------------|
| smc261.pcaac362                | 0.035901959  | 0.014682263 | 0.015743936 |
| c181.lysopcac204               | 0.081096722  | 0.033181194 | 0.015794309 |
| pcaac405.pcaac405              | -0.110893973 | 0.045373664 | 0.015796006 |
| pcaac344.pcaac405              | 0.075391015  | 0.030859889 | 0.015838229 |
| c142.asparticacid              | 0.077187165  | 0.031609677 | 0.01588559  |
| pcaec322.glutamine             | 0.05699507   | 0.023348848 | 0.015921897 |
| pcaec363.glutamine             | 0.032927341  | 0.013503806 | 0.016034006 |
| pcaac240.glutamine             | 0.03408606   | 0.013979666 | 0.016038883 |
| pcaac421.glutamine             | 0.031828266  | 0.013054413 | 0.016044698 |
| pcaac320.smc202                | 0.097975031  | 0.040186272 | 0.016048978 |
| lysopcac280.pcaec421           | -0.013791832 | 0.005662706 | 0.016154155 |
| pcaec405.glutamine             | 0.0307817    | 0.01263954  | 0.016162938 |
| pcaac240.lysopcac203           | 0.080129367  | 0.032926753 | 0.016239465 |
| pcaec343.c14                   | -0.070538947 | 0.028990304 | 0.016255502 |
| c10.c18                        | -0.081936207 | 0.033683976 | 0.016285313 |
| pcaec362.glutamine             | 0.040790557  | 0.016774685 | 0.016320858 |
| kynurenine.pcaac342            | -0.051100898 | 0.021015302 | 0.01632384  |
| smc161.pcaec365                | 0.155027757  | 0.063771261 | 0.016350056 |
| pcaac344.pcaec382              | 0.028892321  | 0.011892208 | 0.016414129 |
| pcaec406.glutamine             | 0.035370358  | 0.014564007 | 0.016453303 |
| c142.lysopcac203               | -0.032452845 | 0.013365765 | 0.01647753  |
| pcaac366.c12                   | 0.159770129  | 0.065843257 | 0.016544441 |
| pcaec381.smc240                | -0.215450541 | 0.08879272  | 0.01654787  |
| lysopcac204.smohc241           | -0.23732355  | 0.097812907 | 0.016554109 |
| methionine.c14                 | 0.085982604  | 0.035471522 | 0.016655363 |
| pcaec360.pcaac342              | 0.069755868  | 0.028778388 | 0.016659404 |
| alanine.pcaec360               | 0.013542466  | 0.005588098 | 0.016679169 |
| lysopcac182.pcaac426           | -0.166058858 | 0.068565732 | 0.016747695 |
| pcaec422.glutamine             | 0.02168764   | 0.008960915 | 0.016820424 |
| lysopcac281.pcaac402           | -0.204129575 | 0.084353493 | 0.016834528 |
| pcaec444.methionine            | -0.212342098 | 0.087797704 | 0.016896366 |
| ornithine.pcaec382             | -0.024733863 | 0.010228661 | 0.016916141 |
| pcaec321.pcaac320              | 0.343250004  | 0.141968886 | 0.016929979 |
| pcaac366.smc202                | 0.140364189  | 0.058086195 | 0.016988109 |
| pcaac420.glutamine             | 0.037641254  | 0.01557701  | 0.016988957 |
| phenylalanine.pcaac362         | 0.108605917  | 0.044944485 | 0.016989679 |
| acetylornithoine.c51dc         | 0.34652099   | 0.143457439 | 0.01703216  |
| pcaec446.glutamine             | 0.052522689  | 0.021746735 | 0.017045517 |
| c102.c12                       | 0.171728528  | 0.07111641  | 0.01706554  |
| lysopcac140.lysopcac203        | 0.042745534  | 0.017707153 | 0.017098161 |
| asymmetricdimethylarginine.smc | 0.042869131  | 0.017767895 | 0.01715654  |
| pcaac343.smohc222              | -0.025336049 | 0.010502023 | 0.01716726  |
| citruline.asparagine           | -0.016020834 | 0.006642586 | 0.017196863 |

|                         |              |             |             |
|-------------------------|--------------|-------------|-------------|
| lysopcac203.pcaac405    | 0.070568217  | 0.029263651 | 0.017213753 |
| c101.c182               | 0.126217979  | 0.052347348 | 0.017227343 |
| pcaac405.smc202         | 0.074966541  | 0.031093152 | 0.017233328 |
| alanine.pcaac323        | 0.271571445  | 0.112686897 | 0.017281648 |
| acetylmithoine.c16      | -0.135981656 | 0.056438267 | 0.017307865 |
| pcaec383.c18            | 0.122333136  | 0.050775511 | 0.017312114 |
| pcaac341.glutamine      | 0.019143309  | 0.007946234 | 0.017320729 |
| smc181.pcaec365         | 0.138083062  | 0.057392397 | 0.017464869 |
| c162.c142               | -0.202409645 | 0.084165805 | 0.017513276 |
| pcaec341.smohc222       | -0.013967241 | 0.005813882 | 0.017628282 |
| lysopcac203.glutamine   | 0.032183922  | 0.013406836 | 0.017713203 |
| c10.lysopcac203         | -0.022389574 | 0.009332359 | 0.017779522 |
| c12.glutamine           | 0.058212406  | 0.024270932 | 0.017811762 |
| lysopcac160.pcaec405    | -0.094026266 | 0.03920854  | 0.017827364 |
| pcaac383.c141oh         | -0.315545371 | 0.131652213 | 0.017887949 |
| pcaec340.c12            | 0.135587616  | 0.056582633 | 0.017912957 |
| lysopcac280.glutamine   | 0.029909671  | 0.012484056 | 0.017933891 |
| pcaec444.pcaec342       | 0.282354743  | 0.117959853 | 0.018036328 |
| isoleucine.c14          | 0.080640326  | 0.033692651 | 0.018047702 |
| pcaec420.lysopcac203    | -0.023020463 | 0.009620195 | 0.018070312 |
| c162.c182               | 0.200191878  | 0.083674259 | 0.018089984 |
| pcaac321.glutamine      | 0.029972488  | 0.012530221 | 0.018113568 |
| pcaac323.pcaac405       | 0.114097369  | 0.047739387 | 0.018208947 |
| pcaac361.glutamine      | 0.019694163  | 0.008241183 | 0.01822224  |
| lysopcac170.glutamine   | 0.036384501  | 0.015229489 | 0.018252862 |
| pcaac401.glutamine      | 0.039376385  | 0.016488998 | 0.01830258  |
| kynurenine.c12          | -0.088141589 | 0.036924234 | 0.018347837 |
| pcaac343.lysopcac203    | 0.075004939  | 0.031456776 | 0.018478054 |
| pcaec342.glutamine      | 0.0407382    | 0.01708557  | 0.018478924 |
| pcaac344.smohc222       | -0.015900368 | 0.006669144 | 0.018488255 |
| pcaec420.pcaac420       | -0.280567264 | 0.117699896 | 0.018508412 |
| lysopcac204.lysopcac203 | -0.025104428 | 0.010535035 | 0.018547242 |
| putrescine.lysopcac203  | -0.021818734 | 0.00917286  | 0.018757452 |
| pcaac341.smohc222       | -0.018330302 | 0.007713174 | 0.018861439 |
| lysopcac182.lysopcac203 | -0.031083464 | 0.013085684 | 0.018916119 |
| pcaec300.smohc222       | -0.012895531 | 0.005431368 | 0.018970767 |
| pcaac405.c141oh         | -0.24568878  | 0.103510587 | 0.019005674 |
| pcaac240.c182           | -0.10493207  | 0.04422422  | 0.019046858 |
| glutamicacid.glutamine  | 0.054892129  | 0.023137997 | 0.019064092 |
| pcaac240.c14            | 0.113847861  | 0.048002733 | 0.019098031 |
| pcaec340.glutamine      | 0.022138439  | 0.009338614 | 0.019150706 |
| serine.glutamine        | 0.030588499  | 0.012904404 | 0.019162754 |
| prolinr.c5              | -0.045644473 | 0.019258504 | 0.019177567 |

|                                 |              |             |             |
|---------------------------------|--------------|-------------|-------------|
| pcaac401.c12                    | 0.13412518   | 0.056667928 | 0.01933903  |
| pcaec386.pcaac320               | 0.250211295  | 0.105790994 | 0.019425184 |
| pcaac362.glutamine              | 0.02883173   | 0.012192461 | 0.019446824 |
| c10.smohc221                    | -0.171324582 | 0.07248981  | 0.01951181  |
| asparticacid.pcaac342           | 0.160692376  | 0.068000108 | 0.019527505 |
| lysopcac280.lysopcac203         | 0.063648538  | 0.026939834 | 0.019552876 |
| pcaec301.pcaac405               | 0.069013905  | 0.029214191 | 0.019566866 |
| lysopcac140.glutamine           | 0.03396582   | 0.014385978 | 0.019633092 |
| pcaac320.glutamine              | 0.023320896  | 0.009884212 | 0.019715956 |
| histidine.c5                    | -0.057121581 | 0.024216134 | 0.019745842 |
| pcaec423.smohc221               | 0.264993337  | 0.112422239 | 0.019832713 |
| pcaec300.lysopcac203            | 0.044952504  | 0.019077807 | 0.019876513 |
| asymmetricdimethylarginine.lysc | -0.091724786 | 0.038930762 | 0.019885332 |
| pcaec341.glutamine              | 0.022391136  | 0.009517125 | 0.02005969  |
| smohc141.asparticacid           | 0.06472103   | 0.027515991 | 0.020090597 |
| pcaec342.c14                    | -0.071142517 | 0.03025561  | 0.020129084 |
| smc161.c16                      | 0.085663037  | 0.036433713 | 0.020138445 |
| lysopcac204.pcaec405            | -0.093030905 | 0.039575759 | 0.020164354 |
| pcaac380.c12                    | 0.123408161  | 0.052516619 | 0.02020687  |
| smc161.c14                      | -0.061830228 | 0.026329149 | 0.020286819 |
| pcaac344.pcaac402               | -0.152030112 | 0.06479263  | 0.020388826 |
| c12.phenylalanine               | 0.087401389  | 0.037249773 | 0.020391468 |
| c102.pcaec443                   | -0.059882762 | 0.025528437 | 0.020424731 |
| arginine.glutamine              | 0.019268184  | 0.008219148 | 0.020499756 |
| pcaac342.smohc222               | -0.018695265 | 0.007975585 | 0.020512545 |
| pcaec420.pcaec443               | -0.075992239 | 0.032424011 | 0.020531532 |
| pcaec401.glutamine              | 0.019519227  | 0.008329128 | 0.020542775 |
| pcaec384.glutamine              | 0.031872606  | 0.013625312 | 0.020769679 |
| asparagine.pcaec421             | -0.036401272 | 0.015565779 | 0.020805768 |
| pcaac406.c12                    | 0.153058268  | 0.065497628 | 0.020896475 |
| alanine.c182                    | -0.149443627 | 0.063977462 | 0.02094876  |
| lysopcac203.c14                 | 0.098331868  | 0.042108644 | 0.020985641 |
| pcaac365.smc202                 | 0.086894021  | 0.037213266 | 0.020994603 |
| smc161.c12                      | 0.117494019  | 0.050337657 | 0.021043726 |
| c141.smohc222                   | 0.013121813  | 0.005622277 | 0.021055689 |
| pcaec300.glutamine              | 0.023155334  | 0.00992231  | 0.021068268 |
| c182.pcaec382                   | -0.020606229 | 0.008835439 | 0.021146205 |
| c0.pcaac405                     | 0.084267147  | 0.036154304 | 0.021225591 |
| pcaec360.glutamine              | 0.027232576  | 0.011684632 | 0.021232777 |
| pcaac362.pcaec361               | -0.026403531 | 0.011332536 | 0.021273364 |
| c182.pcaec361                   | -0.02098299  | 0.009007954 | 0.021300781 |
| c4.c142                         | 0.142123002  | 0.061055627 | 0.021389515 |
| lysopcac181.glutamine           | 0.029248966  | 0.012568549 | 0.021422816 |

|                               |              |             |             |
|-------------------------------|--------------|-------------|-------------|
| creatinine.pcaec385           | 0.082421431  | 0.035426224 | 0.021455202 |
| pcaac344.glutamine            | 0.027021046  | 0.011617455 | 0.021491758 |
| pcaac240.pcaec445             | 0.19915541   | 0.085684446 | 0.021580619 |
| h1.pcaec382                   | 0.024211848  | 0.010418886 | 0.021605306 |
| pcaec404.smohc222             | -0.03301321  | 0.014211783 | 0.021654887 |
| lysopcac140.pcaac405          | 0.034166736  | 0.014709656 | 0.021666204 |
| pcaec386.c12                  | 0.115490825  | 0.049762833 | 0.021772687 |
| pcaac380.pcaec342             | 0.349082851  | 0.150436554 | 0.021792699 |
| kynurenine.pcaec360           | 0.010878092  | 0.004687934 | 0.021793857 |
| smc260.pcaec381               | 0.049978091  | 0.021560563 | 0.021928603 |
| c142.pcaec382                 | -0.026750646 | 0.01154321  | 0.02196207  |
| pcaec424.pcaac342             | -0.082123229 | 0.035442892 | 0.021983277 |
| c16.c18                       | 0.267226965  | 0.115446716 | 0.022114789 |
| pcaac300.smohc222             | -0.011988148 | 0.005179484 | 0.022124741 |
| pcaec363.c14                  | -0.069812088 | 0.030195655 | 0.022269327 |
| pcaac425.pcaac422             | -0.139255411 | 0.060232755 | 0.022271387 |
| pcaac321.smohc222             | -0.016957665 | 0.007338405 | 0.02233644  |
| pcaac404.pcaec322             | 0.168829456  | 0.073075205 | 0.022362559 |
| pcaec406.smc240               | -0.175778712 | 0.076109528 | 0.02240835  |
| c162.pcaec381                 | 0.030571614  | 0.013240046 | 0.022438228 |
| pcaac404.pcaec405             | -0.123855154 | 0.053670503 | 0.022514435 |
| c8.pcaec402                   | -0.171321707 | 0.074241421 | 0.022518181 |
| c4.pcaac405                   | 0.134804932  | 0.058426089 | 0.022538647 |
| c162.c101                     | -0.078064807 | 0.03383679  | 0.022548657 |
| lysopcac181.lysopcac203       | -0.027775008 | 0.012045653 | 0.022622629 |
| asymmetricdimethylarginine.c8 | -0.092140461 | 0.039983114 | 0.022699158 |
| pcaac386.glutamine            | 0.028273245  | 0.012274786 | 0.02276419  |
| isoleucine.pcaac402           | -0.168888102 | 0.073339924 | 0.02279587  |
| pcaac421.c12                  | 0.096871026  | 0.042081051 | 0.022842394 |
| pcaac320.transhydroxyproline  | 0.062299194  | 0.027063814 | 0.022846671 |
| pcaac343.c182                 | -0.090816383 | 0.039464561 | 0.02288871  |
| pcaac386.c14                  | -0.173029123 | 0.075223179 | 0.022947137 |
| pcaac426.pcaec405             | -0.130245786 | 0.05667076  | 0.023059372 |
| lysopcac140.asparagine        | 0.021889143  | 0.009534064 | 0.023200312 |
| pcaec380.leucine              | -0.119881086 | 0.052223257 | 0.023220232 |
| c102.c181                     | -0.015347464 | 0.006690528 | 0.023317032 |
| c3.c181                       | -0.031184793 | 0.013597407 | 0.023344994 |
| pcaec362.c12                  | 0.122188094  | 0.05329976  | 0.023402272 |
| pcaec386.c14                  | -0.110594352 | 0.048253398 | 0.023433153 |
| c12.pcaac366                  | -0.068056798 | 0.029702905 | 0.023474685 |
| lysopcac204.c142              | -0.084855576 | 0.037042472 | 0.023503614 |
| pcaac404.smc202               | 0.126182819  | 0.055088757 | 0.023517174 |
| ornithine.pcaac405            | 0.078502048  | 0.0342964   | 0.023613065 |

|                               |              |             |             |
|-------------------------------|--------------|-------------|-------------|
| pcaac361.c141oh               | -0.194001489 | 0.084762061 | 0.02362217  |
| creatinine.lysopcac203        | -0.031618325 | 0.013816639 | 0.023643329 |
| c181.pcaec385                 | -0.148536812 | 0.064984159 | 0.023804485 |
| pcaac322.smohc222             | -0.012741486 | 0.005577057 | 0.023871584 |
| h1.pcaac322                   | 0.172150729  | 0.075379788 | 0.023922762 |
| putrescine.asparagine         | -0.012550814 | 0.005498623 | 0.023997897 |
| c8.lysopcac203                | -0.021471005 | 0.009412402 | 0.024082766 |
| phenylalanine.pcaec405        | -0.160784582 | 0.070517462 | 0.024148055 |
| pcaec301.c2                   | -0.172059173 | 0.075479589 | 0.024179889 |
| smc241.pcaec385               | -0.16256257  | 0.071339944 | 0.02423135  |
| smc161.smc202                 | 0.116047841  | 0.050941571 | 0.024270855 |
| lysopcac281.lysopcac203       | 0.05046733   | 0.022165182 | 0.024343429 |
| pcaac420.c12                  | 0.100413887  | 0.044128924 | 0.024429986 |
| pcaac343.c181                 | -0.01566672  | 0.006889668 | 0.024523891 |
| pcaec361.lysopcac203          | 0.062817561  | 0.027630658 | 0.024553017 |
| lysopcac180.glutamine         | 0.027644619  | 0.012166389 | 0.024631123 |
| lysopcac140.c18               | 0.109654611  | 0.048293771 | 0.024732888 |
| asparticacid.pcaac426         | 0.187744367  | 0.082716872 | 0.024785971 |
| pcaac406.smohc222             | 0.019648257  | 0.008661356 | 0.024862545 |
| c101.smohc222                 | 0.008720339  | 0.003844474 | 0.024876175 |
| pcaec402.glutamine            | 0.067979993  | 0.029980098 | 0.024924696 |
| isoleucine.pcaac405           | 0.136281033  | 0.060105723 | 0.024934017 |
| pcaec446.c12                  | 0.096591017  | 0.042634535 | 0.025046921 |
| c18.pcaac362                  | 0.083929065  | 0.037056714 | 0.025089545 |
| smohc141.pcaac322             | -0.149488901 | 0.066006939 | 0.025098135 |
| pcaec446.serotonin            | -0.295536682 | 0.130528493 | 0.025135408 |
| pcaac321.transhydroxyproline  | 0.060974182  | 0.026937374 | 0.025173395 |
| histidine.c182                | -0.17344891  | 0.076648445 | 0.025213786 |
| pcaac384.transhydroxyproline  | 0.094642386  | 0.041832689 | 0.025246238 |
| pcaac422.c12                  | 0.144548029  | 0.063961363 | 0.025403563 |
| alphaaminoadipicacid.pcaec361 | -0.029656003 | 0.013127815 | 0.025461408 |
| lysopcac180.smc160            | -0.13878736  | 0.061489155 | 0.02558411  |
| kynurenine.c181               | -0.027096302 | 0.012007552 | 0.025616071 |
| pcaec404.pcaec421             | 0.021972745  | 0.009739319 | 0.025649381 |
| creatinine.c14                | -0.10239827  | 0.045401236 | 0.025693067 |
| pcaec360.serotonin            | -0.292604873 | 0.129738364 | 0.025697013 |
| lysopcac161.smohc221          | 0.225325195  | 0.09993182  | 0.02573286  |
| c12.lysopcac204               | 0.053989175  | 0.023955653 | 0.025802287 |
| glutamicacid.pcaec300         | -0.08594189  | 0.03815236  | 0.025874497 |
| pcaac344.c182                 | -0.084326924 | 0.037436704 | 0.025879485 |
| leucine.lysine                | -0.314976073 | 0.13987726  | 0.025925942 |
| lysopcac281.glutamine         | 0.035766662  | 0.01588801  | 0.025966844 |
| pcaac364.c12                  | 0.108848502  | 0.048360316 | 0.025992307 |

|                         |              |             |             |
|-------------------------|--------------|-------------|-------------|
| pcaec385.glutamine      | 0.03125521   | 0.013889868 | 0.026029064 |
| c162.pcaec382           | -0.02369406  | 0.010530188 | 0.026036127 |
| pcaec445.smohc221       | 0.063734219  | 0.028326706 | 0.026045161 |
| pcaec403.pcaec381       | -0.128020873 | 0.056911261 | 0.026076899 |
| pcaac385.glutamine      | 0.016990197  | 0.007555122 | 0.026119364 |
| c141.smohc221           | -0.111744781 | 0.049694117 | 0.026131076 |
| asparticacid.glutamine  | 0.050183959  | 0.022333471 | 0.026237287 |
| smohc241.c12            | 0.154122424  | 0.068598694 | 0.026257204 |
| glutamine.pcaec421      | -0.017516923 | 0.007796789 | 0.026259904 |
| pcaac344.pcaac381       | 0.123331274  | 0.054914771 | 0.026313561 |
| pcaec406.c14            | -0.112154739 | 0.049989337 | 0.026464688 |
| lysine.pcaec405         | -0.12256337  | 0.05463857  | 0.026491614 |
| c51dc.pcaac323          | -0.31447782  | 0.140279622 | 0.026582529 |
| pcaac383.c12            | 0.124691345  | 0.055622868 | 0.026586809 |
| smohc141.c16            | 0.154334551  | 0.068860787 | 0.026618228 |
| putrescine.c16          | -0.087574827 | 0.039091625 | 0.026685304 |
| pcaec341.c141oh         | -0.231507641 | 0.10336957  | 0.02672752  |
| acetylmithoine.pcaac405 | 0.130364057  | 0.058212165 | 0.026737313 |
| pcaec420.pcaec342       | 0.209287963  | 0.093458401 | 0.026743574 |
| pcaac344.pcaec403       | -0.187181885 | 0.083673956 | 0.026899379 |
| pcaec444.c12            | 0.108145718  | 0.04836752  | 0.026974684 |
| pcaec385.tyrosine       | -0.141175681 | 0.063141645 | 0.026978666 |
| c142.pcaec385           | -0.139451686 | 0.062423708 | 0.027106751 |
| pcaac344.smc202         | 0.098003162  | 0.04388724  | 0.027166603 |
| pcaec343.pcaac320       | 0.200598976  | 0.089872583 | 0.027236276 |
| c51.pcaec405            | -0.143912737 | 0.06448655  | 0.027261137 |
| pcaac322.pcaac405       | 0.071291313  | 0.031968558 | 0.027371541 |
| lysopcac180.asparagine  | -0.022489773 | 0.010095162 | 0.027526151 |
| pcaec446.pcaec340       | 0.070758662  | 0.03176373  | 0.027534445 |
| citruline.pcaac405      | 0.074112128  | 0.033301908 | 0.02768482  |
| pcaac366.smc240         | -0.107263901 | 0.048224998 | 0.027768975 |
| pcaac380.c14            | -0.111219944 | 0.050024547 | 0.027833182 |
| smc180.asparticacid     | 0.066467354  | 0.029898983 | 0.027849984 |
| pcaec360.pcaec402       | -0.120843088 | 0.054364226 | 0.027865316 |
| pcaec360.c181           | -0.030947148 | 0.013924615 | 0.02789049  |
| lysopcac280.pcaec381    | 0.058502475  | 0.026340222 | 0.027990618 |
| pcaac422.glutamicacid   | 0.154864524  | 0.069728823 | 0.027996013 |
| lysopcac182.pcaac405    | 0.064136425  | 0.02887953  | 0.028004877 |
| c142.pcaec381           | 0.073126041  | 0.032940089 | 0.028064296 |
| asparagine.c141         | -0.103337126 | 0.046583166 | 0.028178143 |
| phenylalanine.c16       | -0.091368091 | 0.041199697 | 0.028223372 |
| c182.smc202             | -0.125640134 | 0.056684594 | 0.028308072 |
| pcaec321.smc202         | 0.11622082   | 0.052438253 | 0.028317951 |



|                              |              |             |             |
|------------------------------|--------------|-------------|-------------|
| histidine.pcaec381           | -0.016078081 | 0.00725462  | 0.028323734 |
| pcaec365.pcaac320            | 0.162779515  | 0.073452913 | 0.028334044 |
| pcaac300.glutamine           | 0.029182643  | 0.013174189 | 0.028402067 |
| c101.asparagine              | -0.0146238   | 0.006601904 | 0.028405542 |
| pcaac426.smc202              | 0.090090232  | 0.040671472 | 0.028406691 |
| pcaac323.pcaec381            | 0.021993711  | 0.009930056 | 0.028421388 |
| pcaac320.pcaec300            | 0.077788539  | 0.035134357 | 0.028479934 |
| smc202.pcaac405              | -0.076820109 | 0.034726144 | 0.028611262 |
| c141.glutamine               | 0.027456408  | 0.012420954 | 0.028730123 |
| alanine.pcaec443             | 0.086877998  | 0.039312782 | 0.02877086  |
| pcaac406.glutamine           | 0.02305879   | 0.010439971 | 0.028857282 |
| lysine.pcaec381              | -0.019662891 | 0.008908925 | 0.028971589 |
| lysopcac204.lysine           | 0.126065904  | 0.057133185 | 0.029012607 |
| pcaec341.smc202              | 0.101473402  | 0.046006845 | 0.0290779   |
| asparagine.pcaec381          | -0.019844935 | 0.0089989   | 0.029103223 |
| c14.phenylalanine            | 0.079507217  | 0.036064162 | 0.029150446 |
| lysopcac140.smohc222         | -0.014375819 | 0.006521993 | 0.029179062 |
| c162.smc202                  | -0.098122166 | 0.044528289 | 0.029223313 |
| pcaec401.pcaac420            | -0.204820239 | 0.093022765 | 0.029350474 |
| acetylmethionine.c181        | -0.023933438 | 0.010870385 | 0.029359067 |
| pcaac341.lysopcac203         | 0.055294483  | 0.025115841 | 0.029368638 |
| pcaac361.smc240              | -0.090557277 | 0.041138099 | 0.029388784 |
| creatinine.c181              | -0.072317549 | 0.032857114 | 0.029412581 |
| pcaec385.pcaac405            | -0.103874206 | 0.047194809 | 0.029412871 |
| smc202.c16                   | 0.086705585  | 0.039423111 | 0.029529486 |
| c18.pcaec381                 | 0.021327006  | 0.009703232 | 0.02963366  |
| pcaec401.lysopcac203         | -0.055558009 | 0.02527808  | 0.02963767  |
| pcaec301.c162                | -0.205951608 | 0.093717624 | 0.029659319 |
| pcaec445.pcaec340            | 0.04944773   | 0.022520414 | 0.029797563 |
| pcaac361.transhydroxyproline | 0.064270877  | 0.029296984 | 0.029938012 |
| pcaec382.pcaac422            | -0.409850177 | 0.186850343 | 0.029960338 |
| lysopcac204.asparagine       | -0.014795276 | 0.00674638  | 0.029989694 |
| pcaac364.pcaec382            | 0.02795057   | 0.012747668 | 0.030024048 |
| pcaec300.pcaec365            | 0.050556018  | 0.023065073 | 0.030076901 |
| pcaac425.glutamine           | 0.021362979  | 0.009746907 | 0.030085482 |
| c142.asparagine              | -0.018143879 | 0.008278261 | 0.030086953 |
| smc160.c16                   | 0.126396298  | 0.057699933 | 0.030173522 |
| asparagine.pcaac402          | -0.12336788  | 0.056317927 | 0.030174866 |
| pcaac384.c141oh              | -0.24891986  | 0.113633768 | 0.030176099 |
| pcaac344.asparticacid        | -0.074007107 | 0.03379306  | 0.030215797 |
| isoleucine.lysopcac203       | 0.035671314  | 0.016288559 | 0.030219341 |
| c4.pcaec405                  | 0.068368009  | 0.031224023 | 0.030246399 |
| pcaac322.pcaec382            | 0.03023881   | 0.013813824 | 0.030288798 |

|                              |              |             |             |
|------------------------------|--------------|-------------|-------------|
| c3.pcaec405                  | -0.107073195 | 0.048914666 | 0.030292214 |
| lysopcac140.c182             | -0.101995549 | 0.046626217 | 0.030401185 |
| pcaec420.c12                 | 0.076549249  | 0.035006538 | 0.030461012 |
| asparticacid.c181            | -0.045413462 | 0.020775424 | 0.030520091 |
| kynurenine.c14               | -0.073647819 | 0.033706297 | 0.030590105 |
| c8.asparagine                | -0.014208142 | 0.006503936 | 0.03062323  |
| serotonin.pcaec420           | 0.180811365  | 0.082772347 | 0.030630987 |
| pcaec343.pcaac362            | 0.035855673  | 0.01641531  | 0.030642933 |
| pcaec420.glutamine           | 0.019676976  | 0.009011829 | 0.030704646 |
| pcaec301.c182                | -0.096771906 | 0.044338672 | 0.03077227  |
| smc161.pcaec381              | 0.020803766  | 0.00953455  | 0.030819546 |
| acetylmethionine.pcaec381    | 0.013234211  | 0.00606767  | 0.030882378 |
| methioninesulfoxide.pcaec381 | -0.038467724 | 0.017644346 | 0.030952685 |
| c141.lysopcac204             | 0.098496168  | 0.045206814 | 0.031057502 |
| methioninesulfoxide.pcaec340 | -0.099634963 | 0.045737062 | 0.031084911 |
| c141.c12                     | 0.189170542  | 0.086860762 | 0.031128238 |
| c8.c182                      | 0.092587824  | 0.042515395 | 0.031136711 |
| pcaac424.pcaac422            | -0.355432724 | 0.163229619 | 0.031155496 |
| lysopcac160.smc240           | -0.131016625 | 0.0601687   | 0.031156513 |
| methionine.c181              | 0.026465892  | 0.012156329 | 0.031183892 |
| pcaec322.smohc222            | -0.017130818 | 0.007869708 | 0.031208557 |
| smohc161.pcaec381            | 0.050866198  | 0.023368298 | 0.031215175 |
| pcaec446.c16                 | 0.138882293  | 0.063803616 | 0.031215409 |
| pcaac343.smc240              | -0.105115259 | 0.04829458  | 0.031228491 |
| smc240.pcaec402              | -0.102833729 | 0.047267704 | 0.031303601 |
| pcaec340.c16                 | 0.152472709  | 0.070108145 | 0.031360094 |
| pcaac363.c5                  | 0.02666799   | 0.012263556 | 0.031379183 |
| citruline.pcaec382           | -0.021179436 | 0.0097425   | 0.031429035 |
| smc160.glutamine             | 0.04995943   | 0.022983129 | 0.03144273  |
| pcaac424.c12                 | 0.166123145  | 0.076434658 | 0.031469046 |
| pcaec421.c12                 | 0.151443827  | 0.069699267 | 0.031513823 |
| pcaac365.smc240              | -0.092834236 | 0.042784955 | 0.031747639 |
| c101.lysopcac203             | -0.018489534 | 0.008525101 | 0.031821401 |
| c4.glutamine                 | -0.024457332 | 0.011277809 | 0.031837716 |
| glutamicacid.c12             | -0.302708512 | 0.139594935 | 0.031849092 |
| c142.pcaec340                | 0.059483156  | 0.027435248 | 0.031876165 |
| pcaac404.lysopcac203         | 0.046330033  | 0.021371042 | 0.031894861 |
| c141.pcaec381                | 0.098147839  | 0.04529609  | 0.031979051 |
| c8.pcaac381                  | -0.048142921 | 0.022218527 | 0.03198016  |
| smc240.c142                  | 0.124877947  | 0.057643571 | 0.032012148 |
| smc160.c14                   | -0.066540489 | 0.030715225 | 0.032013151 |
| c51dc.pcaac362               | 0.032628742  | 0.0150622   | 0.032021079 |
| pcaec445.serotonin           | -0.31037847  | 0.143448672 | 0.032222498 |

|                                 |              |             |             |
|---------------------------------|--------------|-------------|-------------|
| pcaec386.transhydroxyproline    | 0.138279403  | 0.063918659 | 0.032247973 |
| pcaac341.c18                    | 0.095616734  | 0.044221242 | 0.032336702 |
| pcaec406.c12                    | 0.104503033  | 0.048333885 | 0.032346796 |
| pcaac361.smc202                 | 0.063750464  | 0.029490127 | 0.032374406 |
| c8.phenylalanine                | 0.121007384  | 0.055992539 | 0.0324234   |
| c142.lysopcac204                | 0.054726631  | 0.025323514 | 0.032426133 |
| phenylalanine.lysine            | -0.237880009 | 0.110115698 | 0.032491294 |
| putrescine.pcaac405             | 0.041719846  | 0.019317663 | 0.032538675 |
| c141.smc160                     | -0.182401691 | 0.0844798   | 0.032582781 |
| pcaac380.pcaac320               | 0.316741523  | 0.146706652 | 0.03259096  |
| c51.pcaec382                    | -0.023199064 | 0.010749042 | 0.032651791 |
| methioninesulfoxide.pcaac402    | -0.342351839 | 0.15866932  | 0.0326995   |
| lysopcac203.pcaec421            | -0.007739667 | 0.003587179 | 0.032703618 |
| c2.pcaec381                     | 0.029302481  | 0.013585666 | 0.032761162 |
| pcaec360.lysopcac161            | 0.193763753  | 0.089900488 | 0.032884927 |
| smohc141.pcaec381               | 0.035863807  | 0.016639723 | 0.032885003 |
| lysopcac180.lysine              | 0.178441393  | 0.082795193 | 0.03289285  |
| glutamicacid.pcaec383           | 0.27488377   | 0.12766069  | 0.03305094  |
| pcaec321.transhydroxyproline    | 0.071837303  | 0.033369686 | 0.033088302 |
| c142.pcaec405                   | 0.080074327  | 0.037215458 | 0.033179023 |
| pcaac281.glutamine              | 0.036219073  | 0.016833844 | 0.033185351 |
| histidine.c14                   | 0.110980741  | 0.051594256 | 0.033228305 |
| pcaac320.smohc222               | -0.008934522 | 0.004153669 | 0.033231012 |
| c10.lysopcac204                 | 0.052831825  | 0.024580124 | 0.033361945 |
| alphaaminoadipicacid.c181       | -0.063656284 | 0.029622538 | 0.033398952 |
| serine.pcaec402                 | -0.102984519 | 0.047934668 | 0.033437695 |
| pcaac343.asparagine             | 0.036743713  | 0.01710385  | 0.033450932 |
| pcaec322.c16                    | 0.092915879  | 0.043255104 | 0.033465587 |
| c4.lysopcac204                  | 0.116883195  | 0.054435591 | 0.033539136 |
| leucine.asymmetricdimethylargir | 0.096052157  | 0.044737388 | 0.033552233 |
| lysopcac280.c18                 | 0.080618372  | 0.037552243 | 0.033567626 |
| pcaec420.asparagine             | -0.011449437 | 0.005333532 | 0.033579241 |
| pcaec362.pcaec365               | 0.043188826  | 0.020118895 | 0.033580017 |
| pcaec321.smohc222               | -0.008277206 | 0.003856088 | 0.033592266 |
| pcaac405.c182                   | -0.064297186 | 0.029979962 | 0.033743472 |
| smohc161.asparticacid           | 0.061920318  | 0.028878512 | 0.033784793 |
| pcaec381.pcaec405               | -0.311870335 | 0.145478872 | 0.033818764 |
| c141.asparagine                 | -0.017536271 | 0.008182099 | 0.033859789 |
| phenylalanine.smc202            | 0.118748896  | 0.055413913 | 0.033884725 |
| smc261.pcaec385                 | -0.114918501 | 0.053628117 | 0.033890124 |
| pcaac426.pcaec445               | 0.141676324  | 0.066158084 | 0.034004614 |
| pcaec340.c18                    | 0.07286308   | 0.034029768 | 0.034031275 |
| lysopcac140.pcaec361            | 0.024488251  | 0.011441874 | 0.03410748  |

|                                |              |             |             |
|--------------------------------|--------------|-------------|-------------|
| glutamicacid.pcaec381          | -0.04011061  | 0.018746994 | 0.03416146  |
| pcaac344.c5                    | 0.024748358  | 0.011568    | 0.034177518 |
| c182.pcaec381                  | 0.05411155   | 0.025311991 | 0.03430952  |
| pcaec360.pcaec381              | 0.013352312  | 0.006247819 | 0.034364799 |
| pcaac320.pcaec340              | 0.182873173  | 0.085602894 | 0.034432748 |
| c141oh.lysopcac204             | 0.05874499   | 0.027500747 | 0.034447129 |
| pcaec405.pcaec365              | 0.084427669  | 0.03952785  | 0.034465405 |
| pcaac381.pcaec361              | 0.13895987   | 0.065107015 | 0.034596327 |
| smohc222.asparticacid          | 0.066516244  | 0.031180613 | 0.034685936 |
| pcaec405.pcaec421              | 0.00754494   | 0.003536939 | 0.034692022 |
| pcaac240.smc240                | -0.136982742 | 0.064240201 | 0.034761542 |
| smc261.c182                    | 0.059656565  | 0.027985219 | 0.034814762 |
| smohc241.pcaec381              | 0.017773175  | 0.00834022  | 0.034873228 |
| creatinine.pcaac426            | -0.096908734 | 0.045481515 | 0.034897737 |
| pcaac426.pcaac405              | -0.05956028  | 0.027954882 | 0.034909658 |
| serine.c181                    | 0.044755604  | 0.021010888 | 0.03494926  |
| pcaac381.pcaac342              | -0.064959226 | 0.030498777 | 0.034967658 |
| c181.c16                       | 0.168613464  | 0.079174804 | 0.034989599 |
| c16.lysopcac180                | -0.262174386 | 0.123175926 | 0.035089102 |
| lysopcac203.pcaec360           | -0.013713972 | 0.006443232 | 0.035091148 |
| kynurenine.pcaec381            | 0.014975663  | 0.007037344 | 0.035125144 |
| pcaac366.lysopcac203           | 0.118647672  | 0.055769936 | 0.035174094 |
| lysopcac182.c181               | 0.040506367  | 0.019040179 | 0.035176913 |
| methioninesulfoxide.pcaec382   | -0.05673035  | 0.026673812 | 0.035227431 |
| pcaac320.smc240                | -0.098710711 | 0.046432445 | 0.035305295 |
| glutamicacid.c182              | -0.149376036 | 0.0702785   | 0.035340304 |
| pcaec343.smc160                | 0.271230674  | 0.127639777 | 0.035384234 |
| pcaac425.c182                  | -0.078818631 | 0.037108304 | 0.035465387 |
| serine.pcaec381                | -0.020793524 | 0.009790683 | 0.035483149 |
| pcaac323.pcaec362              | -0.052998927 | 0.024970254 | 0.035596188 |
| smc160.pcaec381                | 0.012207277  | 0.00575268  | 0.035636103 |
| glycine.c181                   | 0.060535863  | 0.02853547  | 0.035686622 |
| lysopcac281.c181               | -0.02285298  | 0.010774678 | 0.035723927 |
| lysine.c2                      | 0.125351667  | 0.059116434 | 0.035772775 |
| asymmetricdimethylarginine.c12 | 0.070250318  | 0.033130626 | 0.035774131 |
| pcaac300.pcaec382              | 0.021081167  | 0.009942314 | 0.035778935 |
| alanine.c141                   | -0.074837033 | 0.035305475 | 0.03583455  |
| c8.pcaec403                    | 0.06337616   | 0.029898957 | 0.035836488 |
| c12.smohc221                   | -0.100667336 | 0.047511701 | 0.035912823 |
| pcaec420.smohc222              | 0.00753605   | 0.003556833 | 0.035916064 |
| c162.smohc222                  | 0.011306351  | 0.005337299 | 0.035949412 |
| pcaec342.pcaec361              | 0.207827419  | 0.098153557 | 0.036035265 |
| c16.pcaec381                   | 0.030248917  | 0.014289156 | 0.036074656 |

|                                 |              |             |             |
|---------------------------------|--------------|-------------|-------------|
| pcaec445.asparagine             | -0.028286186 | 0.013365931 | 0.036128633 |
| prolinr.pcaac420                | 0.250999983  | 0.118639139 | 0.03618326  |
| pcaec422.smc240                 | -0.096431225 | 0.045584597 | 0.03620274  |
| pcaec300.c18                    | 0.073205253  | 0.034613739 | 0.036247449 |
| histidine.c2                    | 0.171364155  | 0.081043264 | 0.036285777 |
| c141.phenylalanine              | 0.127097832  | 0.060127724 | 0.036344879 |
| pcaac322.c2                     | -0.180979247 | 0.085618911 | 0.036346701 |
| pcaac421.pcaec421               | 0.008869236  | 0.004197117 | 0.036399206 |
| pcaac364.pcaec445               | 0.120105124  | 0.056841444 | 0.036415601 |
| lysopcac182.asparagine          | -0.016671843 | 0.007894259 | 0.036510713 |
| pcaac426.glutamine              | 0.017889267  | 0.008476178 | 0.036629629 |
| c51.pcaec381                    | 0.024976785  | 0.011839671 | 0.036712926 |
| c4.pcaec445                     | -0.197171921 | 0.093466504 | 0.03671627  |
| lysopcac182.c3                  | -0.165968798 | 0.078689289 | 0.036749627 |
| pcaac321.c5                     | 0.020188007  | 0.009572257 | 0.036763158 |
| isoleucine.asymmetricdimethylar | 0.065746691  | 0.031181327 | 0.036805747 |
| pcaac405.glutamine              | 0.016758428  | 0.007949024 | 0.036831292 |
| pcaac420.smc240                 | -0.169333616 | 0.080347609 | 0.036895074 |
| c10.asparagine                  | -0.011945053 | 0.005669076 | 0.036935454 |
| pcaec360.c162                   | -0.219111015 | 0.104058257 | 0.037058894 |
| pcaec380.pcaec421               | -0.021578851 | 0.010248406 | 0.037065623 |
| pcaec301.pcaec381               | -0.019378285 | 0.009204233 | 0.037084602 |
| c162.c16                        | 0.170852151  | 0.08118997  | 0.037174628 |
| pcaec384.c12                    | 0.117542434  | 0.055880162 | 0.037252483 |
| glutamicacid.c18                | 0.228243873  | 0.10852068  | 0.037274175 |
| glycine.pcaac405                | 0.040313601  | 0.019169791 | 0.037296737 |
| lysopcac181.c142                | -0.098901563 | 0.047040415 | 0.037340775 |
| c141.pcaec340                   | 0.070995009  | 0.03377037  | 0.03735802  |
| smc261.pcaac405                 | -0.047205836 | 0.022462373 | 0.037423568 |
| pcaac381.smohc221               | -0.107786325 | 0.051379811 | 0.037756417 |
| pcaac360.glutamine              | 0.040368633  | 0.01924449  | 0.037770976 |
| pcaec421.ornithine              | -0.177875464 | 0.084813133 | 0.037807768 |
| c181.smohc241                   | -0.181006718 | 0.086309791 | 0.037815726 |
| pcaac364.glutamine              | 0.019434521  | 0.009273685 | 0.037951966 |
| smohc241.pcaac362               | 0.023038246  | 0.010993682 | 0.037958628 |
| c14.c181                        | -0.059549449 | 0.028418691 | 0.037972818 |
| pcaec343.lysopcac182            | -0.097179998 | 0.04637769  | 0.037975389 |
| pcaec364.transhydroxyproline    | 0.104949372  | 0.050106415 | 0.038054439 |
| smc240.pcaac362                 | 0.025655029  | 0.01225596  | 0.038168598 |
| pcaac322.pcaec403               | -0.211269605 | 0.100948037 | 0.038206237 |
| alphaaminoadipicacid.prolinr    | 0.066464355  | 0.031809372 | 0.038515738 |
| arginine.smohc222               | 0.023045089  | 0.01103026  | 0.038533795 |
| c12.asparagine                  | -0.024861886 | 0.011900248 | 0.03854021  |

|                                |              |             |             |
|--------------------------------|--------------|-------------|-------------|
| lysopcac140.pcaac361           | -0.152354763 | 0.072941922 | 0.038583901 |
| pcaec361.smc240                | -0.11002288  | 0.052679002 | 0.038598594 |
| asparticacid.pcaec401          | 0.146550725  | 0.07017446  | 0.038614709 |
| pcaac424.c18                   | 0.146057634  | 0.07000225  | 0.03878974  |
| lysopcac182.pcaec381           | -0.018453531 | 0.008845394 | 0.038811827 |
| c14.pcaec381                   | 0.029114089  | 0.013956682 | 0.038830074 |
| pcaac404.glutamine             | 0.016761334  | 0.008035731 | 0.038846828 |
| pcaec322.pcaec401              | 0.163690944  | 0.078483301 | 0.038862649 |
| c3.pcaac405                    | 0.1741951    | 0.083522712 | 0.03886975  |
| smc181.c16                     | 0.096256546  | 0.046158773 | 0.038894242 |
| citruline.pcaac322             | -0.09272788  | 0.044467092 | 0.038896196 |
| pcaec322.pcaac362              | 0.08496981   | 0.040792288 | 0.039111324 |
| c0.pcaec381                    | 0.027546075  | 0.013224908 | 0.039119996 |
| pcaac401.smc240                | -0.12517403  | 0.060097395 | 0.039123766 |
| pcaac385.smc240                | -0.07594075  | 0.036470268 | 0.039178303 |
| pcaac425.pcaec342              | 0.217280676  | 0.104364519 | 0.039208429 |
| h1.lysopcac182                 | 0.081584567  | 0.03918836  | 0.039216132 |
| c12.pcaec382                   | -0.034799682 | 0.016716005 | 0.039219751 |
| c181.glutamicacid              | -0.143549059 | 0.068975403 | 0.039280629 |
| pcaec301.c18                   | 0.118617893  | 0.057001675 | 0.039300025 |
| smohc222.c182                  | 0.054081557  | 0.025991568 | 0.03932048  |
| c3.pcaec443                    | -0.120869182 | 0.058131208 | 0.039459079 |
| lysopcac281.pcaec381           | 0.014055688  | 0.006762555 | 0.039532843 |
| pcaec425.smohc221              | 0.097648764  | 0.046995012 | 0.039589391 |
| c51dc.pcaec381                 | 0.010858279  | 0.005227736 | 0.039664525 |
| c14.smohc221                   | -0.210598746 | 0.101410013 | 0.039697003 |
| citruline.smohc221             | 0.043846891  | 0.021117531 | 0.039732584 |
| pcaac406.asparagine            | -0.026927372 | 0.012974912 | 0.039825192 |
| methionine.pcaec361            | 0.023684001  | 0.011413107 | 0.03984244  |
| citruline.pcaec365             | -0.042757062 | 0.020619431 | 0.039986541 |
| asymmetricdimethylarginine.c14 | -0.049590025 | 0.023920084 | 0.040031444 |
| smc180.pcaec381                | 0.024459725  | 0.011798556 | 0.040035465 |
| lysopcac161.c181               | -0.058045077 | 0.028012894 | 0.040132684 |
| pcaac364.pcaac381              | 0.109084468  | 0.052667392 | 0.040216936 |
| citruline.pcaec381             | 0.011526853  | 0.005566804 | 0.040269572 |
| c182.pcaec340                  | 0.049673931  | 0.023999598 | 0.040351275 |
| c12.c141oh                     | 0.317062157  | 0.153240994 | 0.040421662 |
| pcaac403.pcaec421              | -0.023889929 | 0.011547156 | 0.040435105 |
| c141oh.glutamine               | 0.025604733  | 0.012381878 | 0.040528782 |
| c142.c18                       | -0.081819161 | 0.039573024 | 0.04056424  |
| lysopcac161.pcaac405           | 0.102469789  | 0.049574308 | 0.040617326 |
| smc261.c16                     | 0.091667548  | 0.044352557 | 0.040636562 |
| phenylalanine.asparagine       | 0.018760227  | 0.009080417 | 0.040711617 |

|                                |              |             |             |
|--------------------------------|--------------|-------------|-------------|
| glutamine.c181                 | 0.122639901  | 0.059367213 | 0.040733146 |
| pcaec423.lysopcac203           | -0.048853676 | 0.023649012 | 0.040733541 |
| pcaac381.pcaec402              | 0.116248116  | 0.056275529 | 0.040741719 |
| pcaac323.c2                    | -0.127178637 | 0.061567497 | 0.040743394 |
| pcaec380.smc240                | -0.099194819 | 0.048036442 | 0.040809382 |
| h1.c181                        | 0.038833146  | 0.018824539 | 0.041010686 |
| pcaac385.c141oh                | -0.209502547 | 0.101560282 | 0.041016566 |
| lysopcac170.pcaec381           | -0.024719692 | 0.011985541 | 0.041053235 |
| c182.c18                       | -0.079306595 | 0.038462106 | 0.041103335 |
| c51dc.pcaec443                 | -0.088402104 | 0.042877514 | 0.041123186 |
| c101.lysopcac180               | -0.123528751 | 0.05991524  | 0.041124222 |
| creatinine.c182                | -0.082179407 | 0.039878957 | 0.041221421 |
| pcaac281.pcaec381              | 0.014808117  | 0.007186658 | 0.041242735 |
| c10.pcaec403                   | 0.058197551  | 0.028245203 | 0.041248649 |
| pcaec404.c18                   | 0.103412404  | 0.050198281 | 0.041283728 |
| c2.pcaac405                    | 0.048094762  | 0.023346448 | 0.041286872 |
| prolinr.c12                    | -0.057284846 | 0.027831296 | 0.041457717 |
| pcaec425.pcaec421              | 0.003633771  | 0.001766112 | 0.041534873 |
| c181.pcaac362                  | -0.018069678 | 0.008784286 | 0.041578932 |
| asparagine.c181                | 0.034277574  | 0.016667288 | 0.04162465  |
| pcaec340.pcaac362              | 0.042046759  | 0.020449176 | 0.041665589 |
| c8.lysopcac204                 | 0.051301513  | 0.024953122 | 0.041689405 |
| smohc222.smc202                | 0.194293404  | 0.094513075 | 0.041707528 |
| pcaec342.lysopcac182           | -0.051607166 | 0.025105697 | 0.041720704 |
| smc180.pcaec360                | 0.028250767  | 0.013747867 | 0.041786925 |
| pcaac240.pcaec405              | -0.190450197 | 0.09271358  | 0.041859735 |
| pcaac364.pcaec300              | 0.039755386  | 0.019355155 | 0.041877738 |
| c16.c182                       | -0.215760973 | 0.105049016 | 0.041886295 |
| prolinr.pcaec382               | -0.035098718 | 0.017088789 | 0.041886732 |
| c162.pcaec404                  | 0.081301361  | 0.03960726  | 0.042006236 |
| pcaac300.transhydroxyproline   | 0.078011977  | 0.038013918 | 0.042054839 |
| kynurenine.pcaac366            | -0.057223202 | 0.027885305 | 0.042065034 |
| smc260.pcaac405                | -0.074330084 | 0.036227795 | 0.042099542 |
| isoleucine.pcaec381            | -0.013947894 | 0.00679922  | 0.042133672 |
| c141.pcaec402                  | -0.095692454 | 0.046650228 | 0.042145619 |
| creatinine.transhydroxyproline | -0.058081279 | 0.028320506 | 0.042187039 |
| pcaec300.pcaec382              | 0.028004792  | 0.013656144 | 0.042201465 |
| smc240.pcaec381                | 0.014550571  | 0.007095801 | 0.042213439 |
| pcaac240.pcaec402              | -0.163055927 | 0.079518091 | 0.042217166 |
| pcaec382.smc240                | -0.139135062 | 0.067864262 | 0.042252292 |
| pcaac362.smc202                | 0.067625144  | 0.032994242 | 0.042310922 |
| pcaec385.pcaec381              | 0.014911167  | 0.007275539 | 0.042321952 |
| pcaac323.c16                   | 0.102291532  | 0.04991752  | 0.042349922 |

|                                |              |             |             |
|--------------------------------|--------------|-------------|-------------|
| c182.pcaec421                  | 0.003430452  | 0.001674127 | 0.042360962 |
| c141.lysopcac203               | -0.02054765  | 0.010033259 | 0.042474769 |
| phenylalanine.pcaac322         | 0.111009119  | 0.054211913 | 0.042501142 |
| asymmetricdimethylarginine.c16 | 0.17673905   | 0.08633415  | 0.042554648 |
| pcaac364.pcaec443              | -0.052604674 | 0.025700131 | 0.042583245 |
| c162.pcaec405                  | 0.058851399  | 0.028754897 | 0.042603919 |
| pcaec322.pcaec381              | 0.013892601  | 0.006789033 | 0.042636502 |
| methioninesulfoxide.pcaac362   | 0.037412541  | 0.018286525 | 0.042678641 |
| c0.c16                         | -0.114869454 | 0.056146067 | 0.042679019 |
| serine.pcaac362                | 0.032792508  | 0.016029117 | 0.042688517 |
| pcaac426.c182                  | -0.063774468 | 0.031180047 | 0.042733195 |
| pcaec301.prolinr               | -0.054205709 | 0.026512046 | 0.042812458 |
| lysopcac140.c141oh             | -0.259768579 | 0.12707938  | 0.042855009 |
| c18.putrescine                 | -0.062758164 | 0.030719691 | 0.042976857 |
| smc202.smc181                  | -0.059057651 | 0.028915402 | 0.043027168 |
| leucine.c181                   | 0.032489109  | 0.015908148 | 0.043040763 |
| smc160.pcaec365                | 0.087329654  | 0.042780152 | 0.043134828 |
| methionine.pcaec381            | -0.012981692 | 0.006360035 | 0.043157395 |
| pcaec423.serotonin             | -0.198730738 | 0.09737848  | 0.043190428 |
| pcaac322.c142                  | 0.048241452  | 0.023639441 | 0.043199377 |
| lysopcac204.glutamine          | 0.025550434  | 0.012521466 | 0.043218378 |
| lysopcac281.smc202             | 0.096431983  | 0.047258692 | 0.043220129 |
| pcaec444.c3                    | -0.065356725 | 0.032029852 | 0.043222054 |
| c51.pcaec404                   | -0.05969417  | 0.029258992 | 0.043251834 |
| pcaec445.pcaec381              | 0.016222823  | 0.007954721 | 0.043333025 |
| pcaec444.pcaec421              | 0.005209025  | 0.002554841 | 0.043384794 |
| pcaec422.c12                   | 0.157083773  | 0.077065754 | 0.043443128 |
| pcaac342.c181                  | -0.013280606 | 0.006515907 | 0.043455908 |
| pcaec401.pcaec342              | 0.254015835  | 0.124636397 | 0.043468815 |
| c2.pcaec401                    | -0.101215435 | 0.049700573 | 0.043626319 |
| pcaec341.c12                   | 0.103632447  | 0.050888473 | 0.043630617 |
| c10.pcaec385                   | -0.07919849  | 0.038890675 | 0.043632963 |
| c12.pcaec381                   | 0.086003611  | 0.042234022 | 0.043641161 |
| pcaac405.pcaec381              | 0.014026637  | 0.006889332 | 0.043678275 |
| pcaac420.pcaec421              | 0.004012678  | 0.001971131 | 0.043705844 |
| pcaec445.pcaec421              | 0.003364728  | 0.001653382 | 0.043773719 |
| c141oh.pcaec340                | 0.109096869  | 0.05362301  | 0.043829003 |
| c102.pcaec381                  | 0.00619437   | 0.003045258 | 0.043871146 |
| asparticacid.pcaec443          | -0.138503938 | 0.068099533 | 0.043897509 |
| leucine.pcaec381               | -0.014585224 | 0.007173501 | 0.043962712 |
| pcaec341.pcaec381              | 0.005677293  | 0.002792353 | 0.043967972 |
| asparticacid.pcaac405          | -0.087173291 | 0.04287699  | 0.043973626 |
| pcaac362.pcaec381              | 0.008154264  | 0.004011155 | 0.043994632 |



|                               |              |             |             |
|-------------------------------|--------------|-------------|-------------|
| lysopcac180.putrescine        | -0.089812517 | 0.044182007 | 0.044006105 |
| pcaec401.c12                  | 0.113529946  | 0.055850482 | 0.044009905 |
| c4.c18                        | -0.136156142 | 0.067033277 | 0.044171628 |
| pcaac363.c181                 | -0.012927776 | 0.006364906 | 0.044178818 |
| c14.lysopcac204               | 0.060290706  | 0.029692944 | 0.044243637 |
| c162.pcaec402                 | -0.057587729 | 0.028363219 | 0.044254557 |
| alanine.c142                  | -0.06781886  | 0.033404231 | 0.044266796 |
| c0.c141                       | 0.119402106  | 0.058818961 | 0.044292982 |
| pcaec422.smc202               | 0.108132478  | 0.053308402 | 0.044454129 |
| pcaec380.c12                  | 0.133752866  | 0.065956212 | 0.04450876  |
| pcaec361.pcaac362             | 0.044451043  | 0.02192116  | 0.044522756 |
| pcaec364.glutamine            | 0.035779913  | 0.01765045  | 0.044587998 |
| c141oh.c12                    | 0.129271038  | 0.063787566 | 0.044645249 |
| lysopcac204.c14               | 0.089499469  | 0.044165603 | 0.044659246 |
| pcaec402.pcaac362             | 0.022627387  | 0.011168252 | 0.044701434 |
| c101.smc202                   | -0.093544795 | 0.046178391 | 0.044734572 |
| pcaec341.pcaec382             | 0.038121632  | 0.018819034 | 0.044737803 |
| c14.glutamine                 | 0.029873488  | 0.01475046  | 0.04478329  |
| pcaec383.c12                  | 0.186405696  | 0.09206884  | 0.044848257 |
| pcaec301.glutamine            | 0.02563896   | 0.012663566 | 0.044849295 |
| smc181.smc202                 | 0.135842255  | 0.067116324 | 0.044916165 |
| pcaec423.c12                  | 0.114139188  | 0.056393789 | 0.044917729 |
| c51dc.lysopcac204             | 0.045852138  | 0.022656934 | 0.044939632 |
| smc202.pcaec385               | -0.081872893 | 0.04045961  | 0.044959084 |
| pcaac426.serotonin            | -0.205044677 | 0.101393679 | 0.045095792 |
| pcaec340.pcaec381             | 0.008148661  | 0.004032052 | 0.045231111 |
| pcaac361.pcaec381             | 0.005558276  | 0.002751219 | 0.045302059 |
| pcaac240.pcaec381             | 0.069088745  | 0.034207216 | 0.045363346 |
| c102.c18                      | -0.114088976 | 0.056499054 | 0.045405948 |
| smc261.pcaec382               | 0.042241204  | 0.020921927 | 0.045439182 |
| pcaac320.pcaec381             | 0.004454293  | 0.002206389 | 0.045457721 |
| pcaec342.pcaac362             | 0.031720248  | 0.015719149 | 0.045550453 |
| smc240.smohc221               | -0.083986627 | 0.041620819 | 0.045554389 |
| citruline.c182                | -0.152569668 | 0.075609234 | 0.045557407 |
| pcaac240.asparagine           | 0.033843677  | 0.016774301 | 0.045586966 |
| smohc141.pcaec385             | -0.124386445 | 0.06166322  | 0.045629296 |
| putrescine.smc181             | 0.052201824  | 0.025893425 | 0.045752477 |
| pcaec420.pcaec382             | 0.02977643   | 0.014772061 | 0.045784281 |
| pcaac341.smc240               | -0.063650448 | 0.031582358 | 0.045820997 |
| pcaec404.pcaac403             | -0.2431403   | 0.12066849  | 0.045867207 |
| pcaac321.alphaaminoadipicacid | 0.02591322   | 0.01286149  | 0.045883454 |
| pcaec425.pcaec365             | 0.077435683  | 0.0384437   | 0.045939709 |
| pcaac385.pcaec381             | 0.01243522   | 0.006174802 | 0.045981891 |

|                          |              |             |             |
|--------------------------|--------------|-------------|-------------|
| phenylalanine.pcaec360   | 0.012014175  | 0.005966253 | 0.046000715 |
| lysopcac140.prolinr      | -0.088916654 | 0.04415864  | 0.046012986 |
| pcaac321.pcaec365        | 0.087544622  | 0.043482989 | 0.046041294 |
| c51dc.smc202             | 0.095632565  | 0.047509586 | 0.046083533 |
| kynurenine.pcaac425      | 0.198886106  | 0.098806557 | 0.04608644  |
| pcaac360.pcaec342        | 0.319549044  | 0.158767836 | 0.046108024 |
| pcaac402.smc240          | -0.149618935 | 0.074361935 | 0.046176814 |
| lysine.c181              | 0.04073642   | 0.02025216  | 0.046238364 |
| c3.pcaec403              | -0.126895583 | 0.063090386 | 0.04625232  |
| pcaec341.pcaec340        | 0.123506927  | 0.061419619 | 0.046301426 |
| pcaac380.pcaec381        | 0.013575727  | 0.006751773 | 0.046320742 |
| pcaac322.pcaec381        | 0.006931254  | 0.003448109 | 0.046377491 |
| c0.c181                  | -0.053095703 | 0.026415277 | 0.046390671 |
| smohc221.pcaec443        | -0.139242053 | 0.069285205 | 0.046427543 |
| prolinr.pcaec443         | 0.125019137  | 0.062211009 | 0.046437801 |
| pcaec425.leucine         | -0.076971403 | 0.038307684 | 0.046470448 |
| pcaac342.pcaec381        | 0.005703975  | 0.002839083 | 0.04649233  |
| pcaec321.c16             | 0.079609743  | 0.039627032 | 0.046504645 |
| lysopcac140.c181         | -0.058578578 | 0.029158671 | 0.04650642  |
| smc160.pcaec385          | -0.131236294 | 0.065332279 | 0.046528763 |
| pcaac425.c12             | 0.115193229  | 0.057358466 | 0.046576857 |
| creatinine.smohc161      | 0.074427377  | 0.037065232 | 0.046608418 |
| spermidine.glutamine     | 0.098945225  | 0.04927855  | 0.046622887 |
| pcaec446.pcaec381        | 0.009636979  | 0.004800363 | 0.046657753 |
| pcaec424.c12             | 0.105305809  | 0.052456099 | 0.046663006 |
| pcaac321.pcaec381        | 0.005151687  | 0.002566618 | 0.046696897 |
| creatinine.lysopcac280   | -0.013920795 | 0.006935604 | 0.046701176 |
| pcaac343.pcaec381        | 0.006745604  | 0.003361137 | 0.046723619 |
| ornithine.pcaec381       | -0.056436085 | 0.028124601 | 0.04675561  |
| pcaac424.pcaec422        | -0.317914644 | 0.158479893 | 0.046822526 |
| pcaac341.pcaec381        | 0.004652238  | 0.002319735 | 0.046878838 |
| methioninesulfoxide.c181 | 0.064392924  | 0.032118702 | 0.0469505   |
| smc160.asparticacid      | 0.049130933  | 0.024510736 | 0.046991259 |
| smc241.pcaec381          | 0.01912127   | 0.009540729 | 0.047023029 |
| lysopcac161.pcaec423     | -0.079196214 | 0.039528227 | 0.047092161 |
| pcaec422.pcaec362        | 0.023122929  | 0.011542605 | 0.047121254 |
| pcaec386.glutamine       | 0.042607791  | 0.021270847 | 0.047138684 |
| pcaec444.pcaec381        | 0.008124751  | 0.004056208 | 0.047145874 |
| pcaac342.c5              | 0.02564361   | 0.012803114 | 0.047159074 |
| lysopcac181.asparagine   | -0.012455823 | 0.006219412 | 0.047179365 |
| pcaac321.c181            | -0.011826137 | 0.005905422 | 0.047194966 |
| creatinine.pcaec381      | 0.029469993  | 0.01471635  | 0.047201017 |
| pcaec384.pcaec340        | 0.172019339  | 0.085904557 | 0.047210475 |

|                                |              |             |             |
|--------------------------------|--------------|-------------|-------------|
| pcaac363.pcaec381              | 0.005528655  | 0.002761965 | 0.04729068  |
| c101.c51                       | 0.118451097  | 0.059182177 | 0.047317373 |
| pcaec446.asparticacid          | 0.052935921  | 0.026449253 | 0.04732294  |
| pcaac240.pcaec365              | 0.034066605  | 0.017023925 | 0.047357073 |
| c101.pcaec381                  | 0.033121604  | 0.016558904 | 0.047452335 |
| pcaac406.lysine                | 0.200783325  | 0.100390091 | 0.047473969 |
| pcaec402.c18                   | 0.083633438  | 0.041821883 | 0.047504399 |
| pcaac421.smohc221              | 0.096963075  | 0.048490326 | 0.047517037 |
| pcaac322.c181                  | -0.015738949 | 0.007872094 | 0.047550193 |
| pcaac383.c181                  | -0.014604579 | 0.007304956 | 0.047557259 |
| pcaac300.asymmetricdimethylar; | 0.056297023  | 0.028162068 | 0.047582747 |
| c101.pcaec421                  | 0.005366544  | 0.002685262 | 0.047639624 |
| smohc222.pcaec300              | 0.031551953  | 0.015788654 | 0.047653243 |
| lysopcac203.pcaac380           | 0.173693434  | 0.086917833 | 0.047656588 |
| pcaec383.arginine              | -0.241876344 | 0.121039775 | 0.047661243 |
| lysopcac160.c18                | 0.153958234  | 0.077103135 | 0.047830214 |
| pcaac322.pcaac402              | -0.119811724 | 0.060011809 | 0.047864766 |
| c4.pcaec381                    | 0.011034274  | 0.005527354 | 0.047883044 |
| pcaec363.pcaec381              | 0.008973263  | 0.004495497 | 0.047910312 |
| alanine.pcaec381               | -0.01040427  | 0.005213707 | 0.047964845 |
| pcaac384.pcaec381              | 0.011361278  | 0.005695458 | 0.048049253 |
| pcaac344.spermidine            | -0.142762643 | 0.071614804 | 0.048194857 |
| pcaac343.smc202                | 0.099545662  | 0.049940549 | 0.048216588 |
| c4.c181                        | -0.013719315 | 0.006883254 | 0.048232057 |
| pcaac402.c12                   | 0.209152929  | 0.104983681 | 0.048332024 |
| pcaec445.spermidine            | -0.136073821 | 0.068302473 | 0.048334061 |
| pcaec321.pcaac426              | 0.14333798   | 0.071949172 | 0.048335422 |
| pcaec341.lysopcac203           | 0.035751772  | 0.017945852 | 0.04833644  |
| pcaac363.pcaac342              | -0.205362938 | 0.103091046 | 0.04835292  |
| pcaac300.pcaec381              | 0.008594985  | 0.004315445 | 0.048394486 |
| pcaec321.pcaec381              | 0.006496671  | 0.003262013 | 0.048401771 |
| smohc141.pcaec365              | 0.06394403   | 0.032107514 | 0.048407842 |
| pcaac341.transhydroxyproline   | 0.049447209  | 0.024831969 | 0.048439811 |
| pcaec362.lysopcac182           | -0.075716462 | 0.03802984  | 0.048472861 |
| methionine.glutamine           | -0.031089816 | 0.015615475 | 0.04847432  |
| lysopcac281.pcaac366           | -0.089092653 | 0.044749417 | 0.04847863  |
| pcaac405.pcaec445              | 0.060006694  | 0.030141685 | 0.048490028 |
| c10.pcaac381                   | -0.042155794 | 0.021176407 | 0.048503891 |
| pcaec343.pcaec381              | 0.009221961  | 0.004633362 | 0.048543711 |
| c51dc.c181                     | -0.02382803  | 0.011976567 | 0.04863118  |
| pcaac342.pcaec405              | 0.11967831   | 0.060156478 | 0.048642809 |
| c5.lysopcac204                 | 0.111802438  | 0.056208323 | 0.048684947 |
| pcaec445.asparticacid          | 0.050308164  | 0.025294868 | 0.04870776  |

|                                 |              |             |             |
|---------------------------------|--------------|-------------|-------------|
| pcaac363.smc240                 | -0.086921465 | 0.043717684 | 0.048777467 |
| pcaac342.smc240                 | -0.113207346 | 0.056941057 | 0.048788122 |
| c14.pcaec382                    | -0.047738628 | 0.024016114 | 0.048830083 |
| pcaac320.c12                    | 0.076716768  | 0.038615924 | 0.048954887 |
| c51.c181                        | -0.027498152 | 0.013842004 | 0.048964814 |
| pcaac240.lysopcac170            | -0.07816509  | 0.039358824 | 0.049033542 |
| smc260.pcaac362                 | 0.012339094  | 0.006213654 | 0.049051274 |
| glutamicacid.pcaac405           | -0.114127662 | 0.057476054 | 0.049067843 |
| pcaec360.c18                    | 0.101879752  | 0.051316241 | 0.049104316 |
| c181.pcaec402                   | -0.045500948 | 0.022927221 | 0.049188716 |
| lysopcac181.smohc222            | 0.008436916  | 0.004251657 | 0.04921112  |
| putrescine.c14                  | 0.115659887  | 0.058299008 | 0.049264657 |
| pcaec365.pcaac361               | 0.232248169  | 0.117084534 | 0.049300139 |
| pcaac404.pcaec381               | 0.007429096  | 0.003746082 | 0.049348679 |
| smc202.c12                      | 0.085945612  | 0.043352757 | 0.049426967 |
| c3.pcaec381                     | 0.015915408  | 0.008029381 | 0.049463778 |
| pcaac383.pcaec381               | 0.006309171  | 0.003184073 | 0.049539477 |
| c182.pcaac362                   | -0.015366736 | 0.007755397 | 0.04954553  |
| glutamine.pcaec300              | 0.045996187  | 0.023216641 | 0.049574048 |
| c102.tyrosine                   | 0.144323369  | 0.072861683 | 0.049618031 |
| pcaac420.pcaec381               | 0.015476715  | 0.007817315 | 0.049730068 |
| pcaac281.pcaac322               | -0.136882007 | 0.069140536 | 0.049733992 |
| pcaac344.pcaec443               | -0.055572302 | 0.028079286 | 0.049807277 |
| pcaec300.pcaac362               | 0.037767863  | 0.019083934 | 0.049816524 |
| pcaac425.pcaac405               | -0.06611449  | 0.033410705 | 0.049839104 |
| pcaac281.c16                    | 0.107987152  | 0.054580655 | 0.049879432 |
| c181.pcaec340                   | 0.033173846  | 0.016771052 | 0.049930253 |
| pcaec342.pcaec381               | 0.010889837  | 0.005506833 | 0.049990581 |
| putrescine.c142                 | 0.107910759  | 0.05457752  | 0.050026237 |
| pcaac425.pcaec381               | 0.010590416  | 0.005356516 | 0.050036834 |
| pcaec365.asparticacid           | -0.066122806 | 0.033447796 | 0.050061202 |
| pcaec423.pcaec381               | 0.012549293  | 0.006349855 | 0.050128051 |
| pcaac320.c18                    | 0.065006901  | 0.032894712 | 0.050139533 |
| c101.lysopcac204                | 0.037752208  | 0.019108597 | 0.050201992 |
| c4.smohc221                     | 0.06361142   | 0.032203232 | 0.050242646 |
| alphaaminoadipicacid.lysopcac21 | 0.04265058   | 0.021598113 | 0.050308664 |
| pcaac401.pcaec381               | 0.014981177  | 0.007586933 | 0.050324044 |
| pcaec446.pcaec421               | 0.003259701  | 0.001651134 | 0.050367985 |
| pcaac360.c12                    | 0.099995604  | 0.050657627 | 0.05039909  |
| smc261.asparagine               | -0.024486962 | 0.012407414 | 0.0504422   |
| lysopcac204.pcaec381            | -0.034646357 | 0.017558121 | 0.050480955 |
| pcaec342.c16                    | 0.122542395  | 0.062103925 | 0.050487355 |
| histidine.prolinr               | -0.09483354  | 0.048078477 | 0.050569068 |

|                              |              |             |             |
|------------------------------|--------------|-------------|-------------|
| pcaec322.transhydroxyproline | 0.094333377  | 0.04782704  | 0.050579226 |
| pcaac322.smc202              | 0.063572119  | 0.032236708 | 0.05061899  |
| c102.lysopcac203             | -0.05740072  | 0.029110397 | 0.050643519 |
| c16.lysopcac204              | 0.069014573  | 0.035001741 | 0.050652982 |
| c16.pcaec405                 | -0.151332363 | 0.076781333 | 0.050744805 |
| pcaec422.pcaec381            | 0.009112264  | 0.004623544 | 0.050757839 |
| pcaec384.pcaec381            | 0.012486488  | 0.006335694 | 0.050760604 |
| c181.asparagine              | -0.0847359   | 0.043006258 | 0.050818537 |
| pcaac364.pcaec381            | 0.006229713  | 0.00316199  | 0.050833367 |
| pcaec362.pcaec381            | 0.015690081  | 0.007972002 | 0.051070124 |
| pcaac384.pcaac405            | -0.156894664 | 0.079729329 | 0.05110581  |
| pcaec361.pcaec381            | 0.013907805  | 0.007068866 | 0.051148661 |
| pcaec343.pcaec361            | -0.01966058  | 0.00999307  | 0.051154702 |
| pcaac364.spermidine          | -0.134885936 | 0.068570939 | 0.05119207  |
| pcaac364.c8                  | -0.095812456 | 0.048724719 | 0.051273375 |
| c12.lysopcac203              | -0.030166015 | 0.015341015 | 0.05127801  |
| c181.pcaec421                | 0.002257404  | 0.001148053 | 0.051286744 |
| pcaec404.pcaec402            | -0.240982082 | 0.122566264 | 0.051304465 |
| pcaac344.pcaec381            | 0.00713126   | 0.003627276 | 0.051319325 |
| lysopcac181.smc240           | -0.137102265 | 0.069741013 | 0.051334825 |
| smohc221.pcaec381            | 0.019260378  | 0.009798593 | 0.051364069 |
| c2.c181                      | -0.041524839 | 0.021132363 | 0.051438785 |
| lysopcac170.lysopcac203      | -0.069179859 | 0.035211054 | 0.051470167 |
| c8.pcaec421                  | 0.008593193  | 0.004374302 | 0.051499237 |
| lysopcac170.c2               | 0.162308088  | 0.082642181 | 0.051556155 |
| pcaac406.pcaec381            | 0.00853625   | 0.00434648  | 0.051560913 |
| smc241.smohc221              | -0.181035567 | 0.09218178  | 0.051566533 |
| kynurenine.asparticacid      | 0.094285079  | 0.04801681  | 0.051603215 |
| creatinine.pcaec365          | -0.069131675 | 0.035208088 | 0.051611186 |
| creatinine.smc202            | -0.082409972 | 0.041978165 | 0.051652754 |
| glycine.pcaac426             | -0.063814675 | 0.032506149 | 0.051653428 |
| c102.pcaec361                | -0.031991874 | 0.016305734 | 0.05178928  |
| pcaac320.pcaac360            | 0.139739356  | 0.071224119 | 0.051793365 |
| pcaec382.c12                 | 0.193580642  | 0.098682074 | 0.051829527 |
| pcaec445.pcaac426            | -0.160556858 | 0.081855261 | 0.05185155  |
| pcaec402.pcaec365            | 0.054604037  | 0.027843338 | 0.051893492 |
| pcaec424.pcaec381            | 0.01353022   | 0.006899903 | 0.051915632 |
| pcaac366.smohc222            | -0.024629378 | 0.012560336 | 0.051920796 |
| arginine.pcaec381            | -0.019255204 | 0.009821349 | 0.05196086  |
| pcaec443.pcaac362            | 0.102915916  | 0.052494024 | 0.051963148 |
| phenylalanine.pcaac405       | -0.083773554 | 0.04273567  | 0.051993126 |
| isoleucine.lysine            | -0.263317062 | 0.134329773 | 0.051998299 |
| pcaec365.transhydroxyproline | 0.133187254  | 0.067947186 | 0.052006578 |

|                                |              |             |             |
|--------------------------------|--------------|-------------|-------------|
| pcaac404.asparagine            | 0.021034142  | 0.01073125  | 0.05201549  |
| citruline.pcaec385             | 0.16822543   | 0.085831539 | 0.05203134  |
| pcaac363.pcaec443              | -0.045510359 | 0.023223369 | 0.052063185 |
| pcaec423.pcaac362              | 0.026757727  | 0.013655394 | 0.052084556 |
| pcaac421.pcaec381              | 0.013547168  | 0.006914968 | 0.052130794 |
| methionine.c141                | -0.074592511 | 0.038076692 | 0.052142721 |
| pcaec321.lysopcac161           | 0.168489945  | 0.086018269 | 0.052170878 |
| c4.asparticacid                | 0.082111401  | 0.041953846 | 0.052358899 |
| pcaac300.pcaac405              | 0.066560079  | 0.034010221 | 0.052373516 |
| pcaec406.pcaec381              | 0.017460423  | 0.008922705 | 0.052398234 |
| pcaac300.pcaec365              | 0.061982962  | 0.031677557 | 0.052418358 |
| pcaec421.smc240                | -0.087049841 | 0.044503541 | 0.052497269 |
| lysopcac181.pcaac405           | 0.08381101   | 0.042859217 | 0.052559802 |
| lysopcac280.pcaac402           | -0.188995932 | 0.096651159 | 0.052565947 |
| c181.valine                    | -0.130462506 | 0.066738763 | 0.05263994  |
| pcaac323.pcaec365              | 0.070263952  | 0.035962733 | 0.052762324 |
| pcaac380.pcaec361              | -0.022304209 | 0.011418088 | 0.052808821 |
| pcaac386.pcaec381              | 0.00649871   | 0.003328438 | 0.052920186 |
| pcaec444.lysopcac203           | -0.099198654 | 0.050814519 | 0.052957215 |
| lysopcac161.pcaec381           | 0.035491281  | 0.018184901 | 0.053015043 |
| smc202.pcaac344                | 0.094274435  | 0.048323523 | 0.053109714 |
| pcaac300.smc202                | 0.06174952   | 0.031676312 | 0.05329157  |
| pcaec342.pcaec360              | -0.013445048 | 0.0069018   | 0.053453552 |
| histidine.pcaac405             | -0.131252192 | 0.067383816 | 0.053480127 |
| c10.pcaec421                   | 0.006444873  | 0.003309323 | 0.05352123  |
| pcaac403.c12                   | 0.133633941  | 0.06863408  | 0.053574557 |
| prolinr.c182                   | -0.122695018 | 0.063021191 | 0.053594452 |
| lysopcac170.asparagine         | -0.035490165 | 0.018239071 | 0.053722191 |
| pcaec382.pcaec381              | 0.026619681  | 0.013681664 | 0.053744697 |
| pcaac421.lysopcac203           | -0.056312726 | 0.028953645 | 0.053832129 |
| pcaac381.c18                   | 0.135766265  | 0.069819942 | 0.053881655 |
| pcaac422.lysopcac203           | -0.050068596 | 0.025750023 | 0.053895059 |
| asymmetricdimethylarginine.c14 | -0.204765187 | 0.105310943 | 0.053897878 |
| pcaec386.pcaec381              | 0.019155499  | 0.009853155 | 0.053933026 |
| pcaec384.citruline             | 0.020234671  | 0.010409519 | 0.053961726 |
| c142.c101                      | -0.043163749 | 0.022213462 | 0.05405045  |
| pcaec322.c2                    | -0.120562205 | 0.062104682 | 0.054277904 |
| prolinr.pcaec360               | 0.009088988  | 0.004682356 | 0.054297477 |
| c5.pcaec404                    | -0.063961181 | 0.03295601  | 0.054335391 |
| smc241.pcaec443                | -0.118794983 | 0.061209707 | 0.054337612 |
| asparticacid.asparagine        | 0.015453054  | 0.007965649 | 0.054438787 |
| asparticacid.pcaac366          | -0.029858302 | 0.015391678 | 0.054446495 |
| pcaec380.pcaac362              | 0.095161283  | 0.049059622 | 0.054470102 |

|                               |              |             |             |
|-------------------------------|--------------|-------------|-------------|
| pcaac366.asparticacid         | -0.068968355 | 0.035561446 | 0.054506111 |
| smc202.pcaec423               | -0.130832675 | 0.067464401 | 0.054521978 |
| pcaac420.pcaac361             | 0.13551342   | 0.069892711 | 0.054572015 |
| smc161.pcaec340               | 0.086890704  | 0.044829112 | 0.054647418 |
| pcaac323.pcaec405             | 0.12947246   | 0.066814986 | 0.054707714 |
| pcaec421.pcaec381             | 0.018248096  | 0.009417322 | 0.05471508  |
| pcaac426.pcaec381             | 0.006946541  | 0.003585215 | 0.054735296 |
| pcaac404.pcaec426             | 0.15380271   | 0.07939792  | 0.054789517 |
| pcaec403.pcaec300             | -0.041607258 | 0.021480652 | 0.05480781  |
| lysopcac170.c181              | 0.051583728  | 0.026631389 | 0.054809315 |
| pcaec401.pcaec381             | 0.013051714  | 0.006738711 | 0.054824855 |
| lysine.c141                   | -0.053589802 | 0.027674227 | 0.054871152 |
| pcaac323.c12                  | 0.115564862  | 0.059682484 | 0.054886432 |
| pcaec425.pcaec381             | 0.027070381  | 0.013993118 | 0.055106634 |
| smohc161.valine               | -0.18808189  | 0.097257596 | 0.055193095 |
| pcaec365.pcaec381             | 0.014336058  | 0.007413216 | 0.055193279 |
| pcaec341.pcaec300             | 0.027403208  | 0.014174028 | 0.055256903 |
| pcaec322.lysopcac182          | -0.060745234 | 0.031428797 | 0.055325364 |
| pcaac425.pcaec406             | 0.057268209  | 0.029634692 | 0.05536484  |
| histidine.spermidine          | -0.144843263 | 0.074969503 | 0.055419997 |
| c142.pcaec402                 | -0.089639983 | 0.046402787 | 0.055451031 |
| pcaec446.asparagine           | -0.024469848 | 0.012669329 | 0.055495434 |
| pcaac281.pcaec365             | 0.055042532  | 0.028505198 | 0.055552778 |
| smohc241.smohc221             | -0.046199865 | 0.023929029 | 0.055585384 |
| leucine.c14                   | 0.076544073  | 0.039650928 | 0.055617279 |
| pcaec384.tyrosine             | -0.155736261 | 0.080699564 | 0.055694908 |
| pcaec422.pcaec365             | 0.06430338   | 0.033329666 | 0.055759278 |
| c0.pcaac366                   | -0.106130545 | 0.055013025 | 0.055774849 |
| pcaec364.c12                  | 0.091932676  | 0.047664538 | 0.055830719 |
| pcaac425.pcaac320             | 0.256577617  | 0.133049299 | 0.055868784 |
| pcaec360.smohc222             | -0.018841774 | 0.009771607 | 0.055896865 |
| kynurenine.histidine          | -0.175197155 | 0.09088172  | 0.055955554 |
| pcaac380.glutamine            | 0.035296979  | 0.018313623 | 0.056004225 |
| pcaec300.pcaec381             | 0.014456157  | 0.007501108 | 0.05602422  |
| alphaaminoadipicacid.pcaec381 | 0.029401246  | 0.015260267 | 0.056093357 |
| c141oh.c181                   | 0.079393122  | 0.041218644 | 0.056157283 |
| c2.pcaec406                   | -0.056468477 | 0.029324872 | 0.056223946 |
| c8.c12                        | 0.212201399  | 0.110265952 | 0.056371243 |
| glutamine.pcaec381            | -0.066862018 | 0.034746792 | 0.056394799 |
| c12.smc202                    | -0.097547435 | 0.050704213 | 0.056446905 |
| pcaac342.pcaec381             | 0.070460585  | 0.036625409 | 0.056451418 |
| pcaac343.pcaec365             | 0.05651432   | 0.029379189 | 0.05647668  |
| pcaec363.pcaec361             | 0.16342196   | 0.084983417 | 0.056556625 |

|                                |              |             |             |
|--------------------------------|--------------|-------------|-------------|
| creatinine.c2                  | 0.105738406  | 0.05498955  | 0.056569892 |
| pcaac341.smc202                | 0.062963135  | 0.032774981 | 0.056799623 |
| pcaec365.pcaac362              | 0.069127147  | 0.035984102 | 0.056802959 |
| c141.pcaac366                  | -0.045143192 | 0.023512461 | 0.056940276 |
| prolinr.citruline              | 0.04021458   | 0.020945769 | 0.056944178 |
| pcaec365.pcaec361              | -0.025078691 | 0.01306384  | 0.056974183 |
| c142.c141oh                    | 0.287633512  | 0.149832881 | 0.056975122 |
| c18.pcaec406                   | -0.028932101 | 0.01507172  | 0.056983694 |
| creatinine.pcaac405            | 0.030689979  | 0.015989507 | 0.057015067 |
| pcaec444.pcaec300              | -0.044612741 | 0.023243311 | 0.057015408 |
| pcaac364.pcaec365              | 0.062579642  | 0.032606966 | 0.05703698  |
| smc181.asparticacid            | 0.058583777  | 0.030529727 | 0.057075485 |
| smohc141.smohc222              | -0.018260532 | 0.009518966 | 0.057149346 |
| pcaac380.lysopcac203           | -0.041333299 | 0.021556193 | 0.057259933 |
| pcaac402.c182                  | -0.115133097 | 0.06005815  | 0.057316377 |
| serine.prolinr                 | -0.085506259 | 0.04462796  | 0.057450797 |
| c142.c182                      | 0.226085926  | 0.11800136  | 0.057453268 |
| alphaaminoadipicacid.pcaac362  | -0.02218207  | 0.011577775 | 0.057458682 |
| pcaec360.smc240                | -0.098874333 | 0.051613944 | 0.057492941 |
| citruline.lysopcac203          | -0.020138492 | 0.010523055 | 0.057737868 |
| pcaac403.pcaec381              | 0.020173808  | 0.010545665 | 0.057835213 |
| pcaac344.pcaac384              | 0.351462914  | 0.183746169 | 0.057865208 |
| lysopcac180.c2                 | 0.126842717  | 0.066318072 | 0.057880901 |
| leucine.pcaac362               | 0.025838089  | 0.013510463 | 0.057905654 |
| creatinine.pcaac385            | 0.074130689  | 0.038762435 | 0.057907466 |
| putrescine.pcaac406            | -0.114708053 | 0.059984332 | 0.057925069 |
| h1.pcaec420                    | 0.161296454  | 0.084358984 | 0.057960727 |
| pcaec386.pcaec361              | -0.024270005 | 0.01269562  | 0.058004906 |
| pcaac403.citruline             | 0.059646698  | 0.031201279 | 0.058006013 |
| pcaac422.pcaac362              | 0.031653176  | 0.016561634 | 0.058062974 |
| c10.pcaac366                   | -0.026518973 | 0.013878495 | 0.058119912 |
| serotonin.smohc221             | -0.074174392 | 0.038824662 | 0.058158732 |
| pcaac323.pcaec340              | 0.043010985  | 0.022513554 | 0.058165    |
| leucine.lysopcac203            | 0.02654264   | 0.013896061 | 0.058212368 |
| smohc161.pcaec385              | -0.129674209 | 0.067939507 | 0.058396018 |
| asymmetricdimethylarginine.pro | 0.026019201  | 0.013633423 | 0.058420158 |
| c8.pcaec365                    | -0.055015826 | 0.028837672 | 0.058512717 |
| alanine.asparagine             | 0.029594772  | 0.015517634 | 0.058591799 |
| pcaec341.pcaac362              | 0.018547415  | 0.009725449 | 0.058600828 |
| phenylalanine.c12              | -0.082090383 | 0.043058822 | 0.058683234 |
| histidine.c181                 | 0.031656977  | 0.016605381 | 0.058688709 |
| glutamicacid.lysopcac280       | -0.016875486 | 0.008854118 | 0.058751653 |
| pcaac320.pcaac362              | 0.019574147  | 0.010270475 | 0.058762385 |



|                                |              |             |             |
|--------------------------------|--------------|-------------|-------------|
| pcaec364.pcaec381              | 0.015403783  | 0.008084549 | 0.058831771 |
| c102.c14                       | -0.095980014 | 0.050387856 | 0.058898858 |
| pcaac321.prolinr               | -0.09909601  | 0.05202558  | 0.058907887 |
| pcaac405.smc161                | -0.097294192 | 0.051110178 | 0.059057433 |
| pcaec363.pcaac362              | 0.023163087  | 0.012173429 | 0.059170442 |
| c142.pcaac362                  | -0.010946386 | 0.005752932 | 0.059171597 |
| pcaec365.glutamine             | 0.036317942  | 0.019087726 | 0.059179951 |
| pcaec384.c142                  | -0.100732215 | 0.052943101 | 0.059184589 |
| lysopcac182.alphaaminoadipicac | -0.018678799 | 0.009818361 | 0.059212889 |
| c181.pcaec403                  | 0.062416215  | 0.032819781 | 0.059298475 |
| pcaac341.pcaec340              | 0.175876008  | 0.092504773 | 0.059367408 |
| lysopcac181.pcaec443           | 0.165703606  | 0.087159548 | 0.05938213  |
| pcaac403.pcaec443              | -0.160433339 | 0.084415457 | 0.05946562  |
| asparticacid.pcaec381          | 0.017499304  | 0.009208472 | 0.059488446 |
| pcaac362.pcaac405              | 0.121178563  | 0.063789325 | 0.059578435 |
| pcaec381.pcaec300              | -0.020898274 | 0.011001091 | 0.05958026  |
| lysopcac204.pcaac362           | -0.028372976 | 0.014937895 | 0.05961454  |
| c181.pcaac361                  | -0.086214239 | 0.045397253 | 0.059652831 |
| lysopcac161.transhydroxyprolin | 0.141973872  | 0.07478755  | 0.059751611 |
| c162.lysopcac203               | -0.026952203 | 0.01420468  | 0.059877213 |
| pcaac401.pcaec421              | 0.010121936  | 0.00533507  | 0.059900075 |
| pcaec401.pcaec421              | 0.016376266  | 0.00863186  | 0.059907617 |
| pcaac365.smohc241              | 0.123925131  | 0.065324092 | 0.059921859 |
| smc202.asparticacid            | 0.069236012  | 0.036499737 | 0.059947263 |
| lysopcac203.c101               | -0.075519178 | 0.039814153 | 0.059960368 |
| pcaec402.citruline             | 0.045641835  | 0.024068745 | 0.060024429 |
| histidine.c141                 | -0.082767557 | 0.043647989 | 0.060032434 |
| pcaec446.tyrosine              | -0.084781895 | 0.044728254 | 0.060134165 |
| pcaec301.lysopcac203           | 0.04210544   | 0.022214213 | 0.06014226  |
| pcaac406.pcaec444              | 0.307092542  | 0.162045149 | 0.060185408 |
| lysopcac161.pcaec405           | -0.083280072 | 0.043947231 | 0.0601992   |
| pcaec420.pcaec381              | 0.007664246  | 0.004045859 | 0.060287191 |
| pcaec425.pcaac402              | -0.214644155 | 0.113314819 | 0.060302557 |
| pcaec424.smohc221              | 0.109006473  | 0.057548706 | 0.060311679 |
| pcaec364.lysopcac182           | -0.057583227 | 0.030401589 | 0.060321609 |
| kynurenine.pcaac364            | 0.133341851  | 0.070415582 | 0.060381161 |
| pcaec382.smohc222              | -0.051014348 | 0.026944429 | 0.060424586 |
| pcaac321.smc202                | 0.078452362  | 0.041438441 | 0.060436711 |
| pcaac426.pcaec443              | -0.056611862 | 0.029902676 | 0.060439762 |
| pcaec446.smohc221              | 0.039442049  | 0.020841951 | 0.060542819 |
| smc161.asparticacid            | 0.051899582  | 0.027425188 | 0.060546833 |
| pcaac344.c181                  | -0.015746604 | 0.008322833 | 0.060604484 |
| c3.glutamine                   | -0.033972697 | 0.017957994 | 0.060629954 |

|                               |              |             |             |
|-------------------------------|--------------|-------------|-------------|
| isoleucine.c181               | 0.028985017  | 0.015323933 | 0.060670292 |
| lysopcac281.c18               | 0.071945399  | 0.038058882 | 0.060820522 |
| pcaec360.c182                 | -0.09354888  | 0.049487388 | 0.060822242 |
| smc241.pcaec402               | -0.113064162 | 0.05981934  | 0.060857856 |
| pcaec420.pcaec365             | -0.041463486 | 0.021943476 | 0.06093003  |
| creatinine.pcaec342           | 0.143073612  | 0.075720721 | 0.060939182 |
| pcaac384.asparagine           | -0.03918791  | 0.020743345 | 0.060981175 |
| smc202.pcaec343               | -0.156118212 | 0.082640161 | 0.060987573 |
| acetylmithoine.pcaec421       | -0.017698455 | 0.009368596 | 0.060988488 |
| pcaec384.pcaac405             | -0.096776488 | 0.051234308 | 0.061018967 |
| serotonin.pcaec382            | -0.024239731 | 0.012834915 | 0.06106256  |
| prolinr.c181                  | 0.038274824  | 0.020270418 | 0.061112152 |
| pcaac381.smc240               | -0.113170503 | 0.05994653  | 0.061159981 |
| pcaac421.pcaac362             | 0.02554802   | 0.013537987 | 0.061257744 |
| serine.smohc221               | -0.09564486  | 0.050712192 | 0.061407412 |
| c51.alphaaminoadipicacid      | -0.026140102 | 0.013862034 | 0.061448093 |
| pcaec422.pcaec300             | -0.06862365  | 0.036404013 | 0.061540049 |
| pcaac343.pcaec443             | -0.050618485 | 0.026853664 | 0.06155125  |
| c162.alphaaminoadipicacid     | -0.017393487 | 0.009227737 | 0.061559602 |
| pcaac341.c5                   | 0.017900839  | 0.009504107 | 0.061754382 |
| spermidine.c12                | 0.356727454  | 0.189552447 | 0.061964676 |
| pcaec444.pcaac420             | 0.294540981  | 0.156511173 | 0.061968683 |
| smohc222.pcaec381             | 0.027974402  | 0.01486717  | 0.062008951 |
| pcaac384.glutamine            | 0.019137487  | 0.010173181 | 0.062070908 |
| pcaac322.alphaaminoadipicacid | 0.086583492  | 0.046027519 | 0.062077195 |
| lysopcac203.c2                | 0.17018824   | 0.090519349 | 0.062213489 |
| c141oh.pcaac366               | -0.01550227  | 0.008245968 | 0.062233996 |
| pcaec321.pcaac362             | 0.009995169  | 0.005319509 | 0.062373877 |
| methioninesulfoxide.pcaec421  | -0.009513821 | 0.00506369  | 0.062392148 |
| pcaac381.pcaec300             | -0.027740446 | 0.014766435 | 0.062421973 |
| pcaac403.pcaac362             | 0.033977652  | 0.018086946 | 0.062427744 |
| serine.pcaec401               | 0.13671685   | 0.072780434 | 0.06244008  |
| pcaec301.asparagine           | 0.029646688  | 0.015783438 | 0.062459641 |
| pcaec385.c12                  | 0.098958866  | 0.05268841  | 0.062480473 |
| acetylmithoine.pcaac366       | 0.027519984  | 0.014653111 | 0.062493159 |
| pcaec420.histidine            | -0.117594994 | 0.062634179 | 0.062577179 |
| c162.pcaec340                 | 0.050912201  | 0.027123105 | 0.062633857 |
| pcaac402.c18                  | 0.131707712  | 0.070168039 | 0.062640182 |
| pcaec300.pcaac322             | -0.138489383 | 0.073792437 | 0.062680329 |
| pcaec420.lysopcac204          | -0.068810225 | 0.036674102 | 0.062746714 |
| pcaec402.c12                  | 0.094517225  | 0.050385156 | 0.062797599 |
| pcaac240.kynurenine           | 0.200368482  | 0.106819683 | 0.062815677 |
| pcaac363.pcaec403             | -0.149793568 | 0.079876079 | 0.062876498 |

|                                 |              |             |             |
|---------------------------------|--------------|-------------|-------------|
| serotonin.pcaac406              | 0.119988812  | 0.063986344 | 0.062890244 |
| alanine.smc202                  | 0.086736507  | 0.046266204 | 0.062959318 |
| pcaac366.glutamicacid           | 0.138872699  | 0.07411029  | 0.063078949 |
| pcaac445.valine                 | 0.11217364   | 0.059863748 | 0.063085813 |
| c4.c5                           | 0.03462777   | 0.018480696 | 0.063098231 |
| smohc241.pcaac405               | -0.064079877 | 0.034210971 | 0.063188156 |
| c10.c2                          | 0.102450423  | 0.054701887 | 0.063215054 |
| pcaac386.smc202                 | 0.058261823  | 0.031116557 | 0.063286452 |
| creatinine.asparagine           | -0.012898435 | 0.006889945 | 0.063329263 |
| pcaac422.pcaec300               | -0.05804968  | 0.03101365  | 0.063373919 |
| pcaac342.pcaec361               | -0.022102845 | 0.011810699 | 0.063418635 |
| c12.pcaec300                    | -0.023054079 | 0.012319061 | 0.063420074 |
| creatinine.pcaac362             | -0.063300686 | 0.033831907 | 0.063473147 |
| lysopcac203.pcaec401            | -0.113939961 | 0.060906618 | 0.063515489 |
| pcaac364.transhydroxyproline    | 0.053065371  | 0.02836677  | 0.063521668 |
| pcaec384.smohc222               | -0.013407366 | 0.007167492 | 0.063536747 |
| c0.smohc161                     | -0.032028258 | 0.017123814 | 0.06356291  |
| c10.pcaac323                    | -0.239373712 | 0.127980459 | 0.063562918 |
| c101.lysopcac182                | -0.084371645 | 0.045112461 | 0.063582664 |
| pcaac343.smohc221               | 0.046201224  | 0.024706863 | 0.063621294 |
| pcaac341.c12                    | 0.097144668  | 0.051953366 | 0.063639727 |
| c182.lysopcac204                | 0.049998917  | 0.026743405 | 0.063676721 |
| putrescine.pcaec381             | 0.045178506  | 0.024171317 | 0.063744462 |
| pcaec362.pcaec340               | -0.134553171 | 0.071990135 | 0.063750857 |
| pcaec340.asymmetricdimethylar;  | 0.05167257   | 0.027648714 | 0.063772462 |
| lysopcac204.c182                | -0.055873181 | 0.029898261 | 0.063789158 |
| c102.transhydroxyproline        | 0.050405688  | 0.026977562 | 0.063837806 |
| pcaac385.pcaac420               | -0.131364345 | 0.07031712  | 0.06387429  |
| pcaac300.pcaac362               | 0.020963686  | 0.01122582  | 0.063975086 |
| smc241.asparticacid             | 0.067487009  | 0.03614618  | 0.064030604 |
| c142.pcaac366                   | -0.018168409 | 0.009732135 | 0.064060222 |
| arginine.smc240                 | -0.074175097 | 0.039739213 | 0.064102538 |
| pcaec420.citruline              | 0.021863691  | 0.011714524 | 0.064126776 |
| pcaec383.asparagine             | 0.024296121  | 0.013019763 | 0.064166091 |
| lysopcac140.asymmetricdimethy   | 0.029842322  | 0.015992464 | 0.064176173 |
| pcaac281.pcaac366               | -0.017448035 | 0.009351194 | 0.064199038 |
| smohc161.pcaec365               | 0.056335483  | 0.030202442 | 0.064283575 |
| lysopcac160.c181                | -0.0704427   | 0.03776819  | 0.064301838 |
| pcaec321.lysopcac203            | 0.028049438  | 0.015040624 | 0.064333074 |
| pcaec301.asparticacid           | -0.1343898   | 0.072074589 | 0.064378069 |
| methioninesulfoxide.lysopcac281 | -0.045868682 | 0.02460766  | 0.06446194  |
| smc240.pcaac366                 | 0.038393743  | 0.020597527 | 0.064462288 |
| pcaec363.citruline              | 0.03613277   | 0.01938698  | 0.064495248 |

|                                |              |             |             |
|--------------------------------|--------------|-------------|-------------|
| c8.pcaac366                    | -0.022133879 | 0.011879927 | 0.064584762 |
| lysine.smohc221                | 0.139562112  | 0.074911323 | 0.064599168 |
| lysopcac180.c10                | 0.076174142  | 0.040899785 | 0.064680368 |
| pcaec321.lysopcac182           | -0.04696258  | 0.025217527 | 0.064702943 |
| pcaec364.smc160                | 0.338921391  | 0.181993994 | 0.064707519 |
| pcaec420.lysopcac182           | -0.085377873 | 0.045852184 | 0.064741981 |
| pcaac406.lysopcac203           | -0.029147075 | 0.015654832 | 0.064765566 |
| smohc161.c16                   | 0.136842883  | 0.073500346 | 0.064773923 |
| pcaec361.c18                   | 0.07131528   | 0.038315871 | 0.06485246  |
| lysopcac160.c10                | 0.075725181  | 0.040687056 | 0.064864548 |
| c12.prolinr                    | -0.087685043 | 0.047116327 | 0.064882811 |
| pcaec402.pcaec381              | 0.024593342  | 0.013215486 | 0.064894813 |
| pcaac360.pcaec381              | 0.024025873  | 0.012912028 | 0.064925099 |
| smohc241.glycine               | 0.08882929   | 0.047740991 | 0.06493727  |
| pcaac385.pcaec405              | -0.109871622 | 0.059051204 | 0.064942136 |
| smc260.smc161                  | 0.177620234  | 0.095511345 | 0.065075955 |
| pcaec422.pcaac420              | -0.219511268 | 0.11804602  | 0.065095498 |
| pcaec425.pcaec342              | 0.206407007  | 0.111027902 | 0.065164626 |
| pcaac365.pcaec381              | 0.014973051  | 0.008055512 | 0.065210568 |
| smohc241.c182                  | 0.051281517  | 0.02758952  | 0.065210821 |
| pcaac422.pcaec342              | 0.177260557  | 0.095390987 | 0.065279279 |
| isoleucine.pcaac362            | 0.019531537  | 0.010511541 | 0.065300529 |
| c16.smohc222                   | -0.024000008 | 0.012920993 | 0.065395116 |
| lysopcac182.c14                | 0.095934629  | 0.051658521 | 0.065445376 |
| methioninesulfoxide.asparagine | 0.046748352  | 0.025174892 | 0.06546666  |
| leucine.pcaec385               | 0.117739835  | 0.063414491 | 0.065505742 |
| pcaac343.pcaac402              | -0.134367428 | 0.072374188 | 0.065520829 |
| lysopcac203.c181               | -0.042104109 | 0.022681502 | 0.065556161 |
| c101.pcaec340                  | 0.066972985  | 0.036079636 | 0.065565462 |
| smc161.pcaec361                | -0.017925282 | 0.00965688  | 0.065570584 |
| pcaac342.pcaec443              | -0.043616695 | 0.02349845  | 0.06558016  |
| c10.smohc222                   | 0.005599354  | 0.003016663 | 0.065581664 |
| pcaac380.pcaac366              | 0.134156269  | 0.072295138 | 0.065648667 |
| alanine.c12                    | -0.055458004 | 0.029893972 | 0.065723118 |
| c182.pcaac361                  | -0.122165421 | 0.06587204  | 0.065805086 |
| lysopcac281.pcaac403           | -0.04817546  | 0.025978469 | 0.065826514 |
| smc161.pcaec385                | -0.096386508 | 0.051983887 | 0.065866364 |
| pcaec383.lysopcac203           | 0.036010987  | 0.019422351 | 0.065875141 |
| pcaac322.asparagine            | 0.014903856  | 0.008038768 | 0.065889948 |
| pcaec443.pcaec381              | -0.351071346 | 0.189433637 | 0.065995084 |
| c142.pcaec365                  | -0.047226118 | 0.025484176 | 0.066011483 |
| pcaac343.pcaec404              | -0.025794953 | 0.01392426  | 0.066103286 |
| pcaac323.pcaac384              | 0.152038031  | 0.082077621 | 0.066124936 |

|                                |              |             |             |
|--------------------------------|--------------|-------------|-------------|
| c182.prolinr                   | 0.036289224  | 0.01959095  | 0.066128194 |
| smc261.pcaac366                | 0.04530367   | 0.024459821 | 0.066154134 |
| c51dc.pcaac344                 | -0.09230056  | 0.049845675 | 0.066217805 |
| pcaac385.c182                  | -0.047292977 | 0.025547775 | 0.066300055 |
| pcaec405.pcaac402              | -0.233046917 | 0.125905152 | 0.066327033 |
| pcaac360.lysopcac203           | -0.060356519 | 0.032611469 | 0.066355461 |
| pcaec361.smc202                | 0.115328408  | 0.062315255 | 0.066362812 |
| c182.glutamicacid              | -0.124774305 | 0.067432404 | 0.066415572 |
| pcaec322.lysopcac161           | 0.14914218   | 0.080609455 | 0.066441536 |
| pcaac322.c182                  | -0.098662887 | 0.053328001 | 0.066451416 |
| histidine.pcaac362             | 0.017320386  | 0.009361994 | 0.06645718  |
| pcaac342.c182                  | -0.088911769 | 0.048063989 | 0.066487939 |
| smc260.citruline               | 0.02992091   | 0.016183045 | 0.066627067 |
| asparticacid.lysopcac280       | -0.016697197 | 0.009031943 | 0.06665937  |
| spermidine.c18                 | 0.128061792  | 0.069274175 | 0.066668145 |
| pcaec401.serotonin             | -0.235535106 | 0.127474327 | 0.06680155  |
| pcaac386.c181                  | -0.01405953  | 0.007610565 | 0.066850527 |
| pcaac344.asparagine            | 0.018678711  | 0.010110981 | 0.066850737 |
| pcaec443.pcaec300              | -0.041691241 | 0.022575494 | 0.066941362 |
| pcaec360.pcaec365              | 0.064806251  | 0.035095793 | 0.066969749 |
| lysopcac180.pcaec300           | -0.024650612 | 0.013351624 | 0.067012107 |
| lysopcac280.pcaac362           | 0.008960018  | 0.004853674 | 0.067046502 |
| pcaac424.pcaec381              | 0.03348622   | 0.018143826 | 0.06710927  |
| c5.pcaac344                    | -0.185066473 | 0.100278679 | 0.067120536 |
| smohc141.pcaac402              | -0.146228968 | 0.079260675 | 0.067209785 |
| alphaaminoadipicacid.pcaac426  | 0.106960998  | 0.05798828  | 0.067266065 |
| pcaec402.pcaec340              | -0.09999298  | 0.054220302 | 0.067314407 |
| pcaac385.c18                   | -0.063749068 | 0.034567658 | 0.067316703 |
| pcaac343.asymmetricdimethylar; | 0.069619519  | 0.037759044 | 0.067375178 |
| pcaec343.pcaac366              | 0.04952746   | 0.026861928 | 0.067375893 |
| pcaac342.pcaac362              | 0.016585094  | 0.008995549 | 0.067387504 |
| pcaac322.asparticacid          | -0.099622028 | 0.054039883 | 0.067418206 |
| pcaac386.pcaec443              | -0.051131224 | 0.027736324 | 0.067420513 |
| smohc141.c14                   | -0.061241769 | 0.03322855  | 0.067483452 |
| phenylalanine.lysopcac203      | 0.017477469  | 0.009483384 | 0.067496628 |
| pcaac422.pcaec381              | 0.033618234  | 0.01824741  | 0.067584956 |
| smc160.c12                     | 0.111743265  | 0.060663598 | 0.067635198 |
| c101.tyrosine                  | 0.145954814  | 0.079236988 | 0.067636901 |
| pcaac426.spermidine            | -0.138242084 | 0.075051611 | 0.067643278 |
| pcaec383.pcaac362              | 0.026525738  | 0.01440082  | 0.067643289 |
| pcaac424.c182                  | -0.092174475 | 0.050041664 | 0.067644104 |
| c142.pcaec401                  | -0.078753118 | 0.042761638 | 0.067685027 |
| pcaec405.pcaac422              | -0.224509246 | 0.121958691 | 0.067805011 |

|                                |              |             |             |
|--------------------------------|--------------|-------------|-------------|
| c51.lysopcac280                | -0.025856545 | 0.014049695 | 0.067878767 |
| putrescine.smohc222            | 0.005412454  | 0.002940981 | 0.067879766 |
| lysopcac140.pcaec381           | 0.026837436  | 0.014584844 | 0.067919039 |
| pcaec342.pcaac366              | 0.046863395  | 0.025468828 | 0.067928087 |
| pcaac424.pcaec406              | 0.112004695  | 0.060873864 | 0.067940252 |
| lysopcac204.pcaac405           | 0.090076661  | 0.048965089 | 0.06799012  |
| lysopcac160.putrescine         | -0.087444634 | 0.047543287 | 0.068041357 |
| smohc221.pcaac405              | -0.064148381 | 0.034883358 | 0.068089331 |
| pcaac322.pcaec404              | -0.045057771 | 0.024510351 | 0.068181685 |
| smc180.c141oh                  | -0.17390482  | 0.094614518 | 0.06822331  |
| c3.pcaac366                    | -0.067379509 | 0.036660608 | 0.068239415 |
| pcaec420.pcaec300              | 0.111985954  | 0.060934271 | 0.068255894 |
| c18.lysopcac204                | 0.066594098  | 0.036236911 | 0.068266795 |
| lysopcac140.pcaec382           | 0.019705491  | 0.010723928 | 0.068298944 |
| pcaec382.pcaec300              | -0.035430178 | 0.019281883 | 0.068304902 |
| smc181.pcaec340                | 0.070527012  | 0.038392651 | 0.068378097 |
| pcaec423.smohc241              | 0.147544672  | 0.080323465 | 0.068394623 |
| c0.leucine                     | 0.081541401  | 0.044391937 | 0.068399038 |
| c101.pcaac281                  | 0.01075007   | 0.005853283 | 0.068438196 |
| prolinr.pcaec381               | -0.01683086  | 0.009164426 | 0.068444943 |
| pcaec404.asparagine            | 0.02755132   | 0.015007486 | 0.068549744 |
| pcaec443.smohc222              | 0.073407059  | 0.039986903 | 0.068558822 |
| smc181.c141oh                  | -0.160779135 | 0.087581393 | 0.068560213 |
| smc181.c12                     | 0.130220818  | 0.070940064 | 0.068578466 |
| ornithine.smohc161             | -0.022504399 | 0.012259919 | 0.068584153 |
| pcaec406.kynurenine            | -0.022468136 | 0.012246348 | 0.068722338 |
| pcaac385.smc160                | -0.188760865 | 0.102931607 | 0.068846733 |
| phenylalanine.smohc222         | -0.010837726 | 0.00591088  | 0.068895428 |
| pcaec420.c16                   | 0.076422319  | 0.041681799 | 0.068903188 |
| pcaec381.smohc221              | -0.083321141 | 0.045450281 | 0.068937986 |
| pcaac381.histidine             | -0.131862989 | 0.071939899 | 0.068979383 |
| pcaec301.pcaec300              | -0.014587706 | 0.007967045 | 0.069272433 |
| pcaac402.pcaec421              | -0.017056466 | 0.00931679  | 0.069314858 |
| pcaac281.asymmetricdimethylar; | 0.038937684  | 0.021276266 | 0.069408683 |
| c101.pcaac366                  | -0.011787603 | 0.006441146 | 0.069416532 |
| pcaac381.pcaac405              | -0.06491525  | 0.03547493  | 0.069440075 |
| c141.smc181                    | -0.052761895 | 0.028834034 | 0.06944655  |
| lysopcac140.tyrosine           | 0.09669987   | 0.052852362 | 0.069480476 |
| asparticacid.c12               | 0.162609743  | 0.088890058 | 0.06952369  |
| smc161.c2                      | -0.109113489 | 0.05965929  | 0.069582724 |
| pcaec385.lysopcac182           | -0.074765361 | 0.040900213 | 0.069725969 |
| pcaac360.pcaac362              | 0.021248453  | 0.011628282 | 0.069829678 |
| pcaec420.asymmetricdimethylar; | 0.046262376  | 0.025323119 | 0.06989397  |

|                                |              |             |             |
|--------------------------------|--------------|-------------|-------------|
| serine.pcaec360                | -0.009760929 | 0.005343208 | 0.069907775 |
| pcaac424.pcaec300              | -0.055564487 | 0.030455844 | 0.070266312 |
| lysopcac181.pcaec381           | -0.030719453 | 0.016841673 | 0.07032916  |
| pcaac421.smc240                | -0.08646726  | 0.047411048 | 0.070365015 |
| asymmetricdimethylarginine.pca | -0.012506326 | 0.006859217 | 0.07043977  |
| c4.pcaec300                    | 0.014318365  | 0.007854453 | 0.070489468 |
| pcaec424.pcaec382              | -0.043207001 | 0.023703658 | 0.070514228 |
| glycine.pcaec381               | -0.030243808 | 0.016592626 | 0.07052536  |
| pcaac300.pcaac322              | -0.217810559 | 0.119520249 | 0.070579064 |
| lysopcac170.asymmetricdimethy  | 0.033089423  | 0.018158148 | 0.070591733 |
| pcaec404.pcaec381              | 0.047270413  | 0.025941112 | 0.070602512 |
| lysopcac203.pcaac425           | -0.16404745  | 0.090060521 | 0.070708695 |
| smc202.c2                      | -0.105293931 | 0.057817919 | 0.070769038 |
| lysopcac182.pcaac366           | 0.023502554  | 0.012905549 | 0.070770515 |
| histidine.pcaac366             | 0.028477516  | 0.015642601 | 0.070863787 |
| phenylalanine.smohc221         | 0.098236646  | 0.053961783 | 0.070867577 |
| pcaac384.pcaac362              | -0.005222371 | 0.002868932 | 0.070893086 |
| pcaac366.pcaec381              | 0.016567722  | 0.009101808 | 0.070901013 |
| citruline.pcaec404             | -0.020885453 | 0.011474904 | 0.070926869 |
| smohc221.pcaec382              | 0.076784893  | 0.042197575 | 0.070995289 |
| pcaec402.pcaec300              | -0.027390014 | 0.01505464  | 0.071037948 |
| pcaec402.lysopcac182           | -0.115320477 | 0.063396661 | 0.071090539 |
| lysopcac181.c181               | 0.054356868  | 0.029882687 | 0.071093923 |
| c51.pcaac366                   | -0.030699425 | 0.016877806 | 0.071107123 |
| pcaac364.pcaec403              | -0.15379364  | 0.084572991 | 0.071176284 |
| pcaac402.pcaec300              | -0.040629703 | 0.022342859 | 0.071177437 |
| lysopcac182.pcaec443           | 0.108372087  | 0.059614129 | 0.071265368 |
| pcaac360.pcaac366              | 0.035384443  | 0.019467758 | 0.071311604 |
| c162.lysopcac170               | -0.03997439  | 0.021994877 | 0.071334865 |
| c181.c18                       | -0.122059384 | 0.067166312 | 0.071361031 |
| lysine.pcaac362                | 0.016562519  | 0.009116589 | 0.071441999 |
| pcaac341.pcaac362              | 0.010285915  | 0.005663355 | 0.071522507 |
| c141oh.pcaac362                | -0.008894567 | 0.004897957 | 0.071560777 |
| pcaec382.pcaac362              | 0.023890174  | 0.013155708 | 0.071563831 |
| methionine.kynurenine          | -0.02764334  | 0.015224033 | 0.071592412 |
| pcaec380.pcaec381              | 0.025580888  | 0.014088477 | 0.071598372 |
| alphaaminoadipicacid.glutamine | -0.015750076 | 0.008675235 | 0.071630748 |
| pcaec300.pcaac403              | -0.053609066 | 0.029528278 | 0.071631584 |
| c102.pcaac366                  | -0.011023619 | 0.006072802 | 0.071673549 |
| smc240.pcaec443                | -0.092747542 | 0.051095498 | 0.071683463 |
| pcaec384.pcaec443              | -0.089808507 | 0.049479792 | 0.071702943 |
| ornithine.pcaac385             | 0.066792523  | 0.036804017 | 0.071739755 |
| lysopcac160.pcaec381           | 0.035923466  | 0.019798655 | 0.071797983 |

|                                |              |             |             |
|--------------------------------|--------------|-------------|-------------|
| c3.lysine                      | -0.211363147 | 0.116504265 | 0.071833596 |
| smc202.pcaac362                | -0.009363778 | 0.005161485 | 0.071840689 |
| c12.pcaac362                   | -0.036109171 | 0.01990805  | 0.07189739  |
| pcaac385.pcaac362              | -0.006930077 | 0.003820921 | 0.071909563 |
| phenylalanine.pcaec381         | -0.044632365 | 0.024617613 | 0.072017033 |
| smohc161.smc202                | 0.190176873  | 0.104895418 | 0.07201883  |
| pcaec365.alphaaminoadipicacid  | 0.018890204  | 0.010423044 | 0.072121912 |
| pcaac405.pcaec444              | 0.183366177  | 0.10118333  | 0.072142521 |
| c181.pcaec401                  | -0.103056779 | 0.056869782 | 0.072152414 |
| pcaec363.pcaac366              | 0.036366507  | 0.020071814 | 0.072204301 |
| asparticacid.pcaac362          | -0.016879291 | 0.009318098 | 0.072261412 |
| pcaac426.c14                   | 0.088142633  | 0.048670945 | 0.07233325  |
| c3.c16                         | -0.064133169 | 0.035413776 | 0.072337002 |
| pcaac343.pcaec403              | -0.154436086 | 0.085302516 | 0.07241721  |
| pcaac384.pcaec300              | 0.017177275  | 0.009488079 | 0.072424316 |
| glutamicacid.pcaec421          | -0.024161089 | 0.013347005 | 0.072452457 |
| c2.lysopcac204                 | 0.069263764  | 0.038262752 | 0.072454281 |
| pcaac380.pcaec340              | 0.088176283  | 0.048711896 | 0.072462814 |
| c51.pcaac344                   | -0.077684373 | 0.042919954 | 0.07249033  |
| pcaac364.c182                  | -0.051916731 | 0.028684428 | 0.07249896  |
| smc241.pcaac405                | -0.048001382 | 0.026531514 | 0.072609143 |
| lysopcac280.pcaec300           | -0.012350028 | 0.006827325 | 0.072657528 |
| smc240.pcaac405                | -0.051694361 | 0.028581437 | 0.072695436 |
| pcaec363.lysopcac182           | -0.085643298 | 0.0473677   | 0.072791839 |
| phenylalanine.smc181           | -0.041794799 | 0.023116154 | 0.072794719 |
| pcaec382.pcaec443              | -0.195705767 | 0.108250881 | 0.072817186 |
| pcaec300.asymmetricdimethylar; | 0.033456288  | 0.018508094 | 0.072853771 |
| pcaac386.pcaec300              | 0.022971551  | 0.012710402 | 0.072909197 |
| pcaac363.pcaac381              | 0.120005566  | 0.06644698  | 0.073108177 |
| pcaec363.smohc221              | 0.033970582  | 0.018811809 | 0.07314326  |
| pcaec420.serotonin             | -0.179186204 | 0.099228078 | 0.073144859 |
| lysopcac182.lysopcac161        | -0.203405009 | 0.112675389 | 0.073234663 |
| smohc161.pcaec300              | 0.047574153  | 0.026355737 | 0.073258649 |
| pcaec444.pcaac362              | 0.009201022  | 0.005097679 | 0.073279793 |
| pcaec364.c14                   | -0.100945181 | 0.055951688 | 0.073404871 |
| pcaac381.pcaac320              | 0.222714309  | 0.123467291 | 0.073454765 |
| smc161.lysopcac182             | -0.054601961 | 0.030271781 | 0.073471755 |
| pcaac281.pcaec361              | -0.02219825  | 0.012308112 | 0.07349991  |
| pcaec421.pcaac362              | 0.022941727  | 0.012721561 | 0.073527132 |
| pcaac386.pcaac401              | 0.063815993  | 0.035387238 | 0.07352901  |
| pcaac424.pcaec402              | -0.233241795 | 0.129339238 | 0.073533456 |
| c2.pcaac366                    | -0.025073483 | 0.013906892 | 0.073593412 |
| pcaec404.c12                   | 0.148030784  | 0.082134355 | 0.073696652 |



|                                |              |             |             |
|--------------------------------|--------------|-------------|-------------|
| c101.pcaac362                  | -0.006881846 | 0.003818505 | 0.073706848 |
| pcaac364.pcaec340              | 0.131486163  | 0.072968098 | 0.073749256 |
| c4.lysine                      | -0.162568176 | 0.090225083 | 0.073774715 |
| pcaac344.pcaac362              | -0.016843059 | 0.009348363 | 0.073789709 |
| c102.asparagine                | -0.036117604 | 0.020047835 | 0.073812005 |
| pcaac342.c12                   | 0.082265755  | 0.045665416 | 0.073824994 |
| lysopcac181.pcaec360           | -0.016623906 | 0.0092294   | 0.073872332 |
| asymmetricdimethylarginine.pca | -0.006097185 | 0.003385946 | 0.073944781 |
| c16.pcaec402                   | -0.070324105 | 0.039054508 | 0.073955513 |
| c101.pcaac381                  | -0.063183929 | 0.035101213 | 0.074053198 |
| pcaac425.lysopcac203           | -0.112837592 | 0.062694907 | 0.074094627 |
| pcaac401.pcaac362              | 0.050184367  | 0.027888056 | 0.07414158  |
| c102.pcaec404                  | -0.028970814 | 0.016102372 | 0.07419384  |
| smc181.pcaec421                | 0.002693055  | 0.001496878 | 0.074201879 |
| pcaac321.lysopcac161           | 0.143626495  | 0.07984872  | 0.07426252  |
| lysopcac280.c182               | -0.078617169 | 0.043707839 | 0.074268146 |
| pcaec404.ornithine             | -0.075942556 | 0.042226593 | 0.074306965 |
| pcaac426.pcaac366              | -0.021729366 | 0.012086444 | 0.074406316 |
| lysopcac181.pcaac366           | 0.050338661  | 0.027999751 | 0.07440699  |
| serotonin.pcaec381             | -0.060269113 | 0.033525786 | 0.074427873 |
| pcaac322.pcaec443              | -0.049578483 | 0.027585636 | 0.074497568 |
| pcaac321.pcaac362              | 0.011190502  | 0.006226603 | 0.074505393 |
| pcaac321.pcaec443              | -0.03872512  | 0.021550018 | 0.074540555 |
| smc161.pcaec421                | 0.00375488   | 0.002090117 | 0.074619594 |
| pcaec423.asparagine            | -0.021395944 | 0.011909875 | 0.074620399 |
| ornithine.asparagine           | 0.034711299  | 0.019321827 | 0.074621439 |
| pcaec380.pcaec342              | 0.185224007  | 0.103111345 | 0.074642487 |
| smc241.citruline               | 0.014766479  | 0.008220494 | 0.074650276 |
| pcaac404.pcaac366              | 0.032609302  | 0.018154157 | 0.074659275 |
| smohc141.pcaac366              | -0.017951788 | 0.009994143 | 0.074661433 |
| pcaac360.asparticacid          | -0.07546239  | 0.042011676 | 0.0746625   |
| pcaac384.prolinr               | 0.062789918  | 0.034965789 | 0.074737845 |
| pcaac384.pcaec405              | -0.124619409 | 0.069402213 | 0.074760478 |
| pcaec401.pcaec300              | -0.043561732 | 0.024260745 | 0.074767992 |
| c141.pcaec421                  | 0.004940749  | 0.002751738 | 0.074778067 |
| asymmetricdimethylarginine.pca | -0.10940621  | 0.060942664 | 0.074821231 |
| pcaac322.pcaac403              | -0.037253924 | 0.020761839 | 0.074963145 |
| asparticacid.pcaac402          | -0.131734473 | 0.073418637 | 0.074971817 |
| smc180.valine                  | -0.098150092 | 0.054713814 | 0.075037687 |
| pcaec445.pcaac362              | 0.015087769  | 0.008410832 | 0.075042762 |
| pcaac385.lysine                | 0.136026236  | 0.075836219 | 0.075069313 |
| c2.pcaac320                    | -0.071845091 | 0.040060899 | 0.075115469 |
| smohc241.smc181                | 0.045308554  | 0.025265288 | 0.075129036 |

|                                |              |             |             |
|--------------------------------|--------------|-------------|-------------|
| c162.c181                      | -0.02960323  | 0.016508076 | 0.075137866 |
| lysopcac161.c141oh             | -0.260148594 | 0.14510729  | 0.075211113 |
| c102.pcaac362                  | -0.00647114  | 0.00360986  | 0.075238887 |
| serine.c5                      | -0.024347176 | 0.013582564 | 0.075254533 |
| smc160.pcaec300                | 0.020030511  | 0.011175158 | 0.07527346  |
| lysine.lysopcac180             | 0.11281797   | 0.062951549 | 0.075317612 |
| pcaec300.spermidine            | -0.133986912 | 0.07476671  | 0.0753294   |
| c162.pcaec421                  | 0.003820603  | 0.00213204  | 0.075341019 |
| lysopcac182.pcaac362           | 0.01382577   | 0.007717622 | 0.075427935 |
| alphaaminoadipicacid.pcaec383  | 0.083959352  | 0.046875704 | 0.075484163 |
| pcaac402.pcaac362              | 0.028960107  | 0.016176265 | 0.075616818 |
| asymmetricdimethylarginine.smc | -0.077127012 | 0.04309316  | 0.075699226 |
| acetylmethionine.ornithine     | 0.053240903  | 0.029748461 | 0.07571072  |
| serine.pcaec404                | 0.04994817   | 0.027909115 | 0.075715641 |
| lysopcac161.pcaac366           | 0.018411337  | 0.010288803 | 0.075750991 |
| c8.spermidine                  | 0.123780294  | 0.069183981 | 0.075800654 |
| pcaec340.pcaac402              | -0.107606086 | 0.06014583  | 0.075810418 |
| glutamine.asymmetricdimethylar | 0.0229417    | 0.01282667  | 0.075890206 |
| pcaec363.c16                   | 0.106385921  | 0.059514976 | 0.076059604 |
| pcaec423.histidine             | -0.171332812 | 0.095854133 | 0.076078435 |
| pcaec401.c181                  | -0.027087624 | 0.01515591  | 0.076105702 |
| pcaec444.asparticacid          | 0.050127047  | 0.028047061 | 0.076108461 |
| histidine.lysopcac204          | -0.028861356 | 0.016148622 | 0.07611079  |
| alphaaminoadipicacid.c8        | -0.08922396  | 0.049929343 | 0.076147966 |
| pcaac380.kynurenine            | -0.01750808  | 0.009798761 | 0.076186941 |
| pcaec403.pcaac362              | 0.017464714  | 0.009774513 | 0.076187604 |
| isoleucine.pcaec300            | -0.020211965 | 0.011312927 | 0.076209533 |
| pcaac406.smc202                | 0.04769017   | 0.026696796 | 0.076252215 |
| pcaac405.pcaac366              | 0.038469584  | 0.021535955 | 0.076263165 |
| pcaec386.pcaac405              | -0.06637048  | 0.037155771 | 0.07626629  |
| serotonin.pcaec402             | -0.057700476 | 0.032304583 | 0.07628865  |
| lysine.pcaac405                | 0.12316794   | 0.068958065 | 0.07629042  |
| pcaac426.pcaac361              | 0.100681036  | 0.056368744 | 0.076292625 |
| smohc141.c182                  | 0.057829523  | 0.032378504 | 0.076303655 |
| lysopcac180.valine             | -0.086105182 | 0.048217593 | 0.076349879 |
| pcaac424.ornithine             | -0.119140144 | 0.066726111 | 0.076391019 |
| lysopcac181.pcaec300           | -0.03121731  | 0.017487338 | 0.076451646 |
| pcaac426.smc240                | -0.061307497 | 0.034348817 | 0.07649853  |
| c3.smohc221                    | 0.038837342  | 0.021766359 | 0.076591095 |
| pcaac420.pcaac362              | 0.026772808  | 0.015005554 | 0.076605731 |
| pcaec384.pcaec300              | 0.014807946  | 0.008299639 | 0.076609931 |
| putrescine.pcaac366            | 0.012781488  | 0.007164327 | 0.076629798 |
| pcaec422.smohc241              | 0.109317214  | 0.061278943 | 0.076649056 |

|                                |              |             |             |
|--------------------------------|--------------|-------------|-------------|
| pcaac383.asparagine            | 0.017969858  | 0.010074386 | 0.076683444 |
| isoleucine.asparagine          | 0.017396493  | 0.009753334 | 0.076695145 |
| pcaec445.pcaec364              | 0.035833744  | 0.020090417 | 0.076698742 |
| pcaec401.alphaaminoadipicacid  | 0.031813288  | 0.017837547 | 0.076718751 |
| pcaac385.transhydroxyproline   | 0.069170592  | 0.038788645 | 0.076756702 |
| pcaac380.pcaec402              | 0.13067134   | 0.073291754 | 0.076818248 |
| pcaac366.smohc241              | 0.120480988  | 0.067580125 | 0.076835512 |
| pcaec381.pcaac362              | 0.022929092  | 0.012861676 | 0.076842386 |
| c101.c16                       | 0.084609129  | 0.047468913 | 0.076897055 |
| lysopcac161.smc181             | -0.037978065 | 0.021320448 | 0.077079583 |
| c12.smohc222                   | 0.010466924  | 0.005876124 | 0.077085227 |
| pcaac361.c5                    | 0.01843689   | 0.010353484 | 0.077170688 |
| pcaec424.pcaac362              | 0.01129243   | 0.006342956 | 0.077241703 |
| pcaac424.pcaec443              | -0.246991784 | 0.138745719 | 0.077263818 |
| c0.creatinine                  | -0.045421938 | 0.025516718 | 0.077278694 |
| serotonin.citruline            | 0.011463025  | 0.006441451 | 0.077363136 |
| h1.pcaec381                    | -0.015741473 | 0.008845736 | 0.077365951 |
| lysopcac181.smc241             | -0.20940901  | 0.117682026 | 0.077383603 |
| c10.pcaec404                   | 0.045442874  | 0.025541431 | 0.077427222 |
| c181.lysopcac180               | -0.058394234 | 0.032824408 | 0.077459268 |
| c12.lysopcac170                | -0.039828568 | 0.022394726 | 0.077543051 |
| c3.pcaec404                    | -0.021152062 | 0.011897611 | 0.077648425 |
| pcaec362.pcaec300              | 0.010293118  | 0.005789786 | 0.077654182 |
| pcaac402.pcaec381              | 0.056168028  | 0.031612128 | 0.077822518 |
| c3.pcaec362                    | -0.01066536  | 0.006002761 | 0.077829968 |
| asparagine.prolinr             | -0.090707224 | 0.051056162 | 0.077850757 |
| smohc141.pcaec300              | 0.017736816  | 0.009984615 | 0.07788416  |
| pcaec362.citruline             | 0.01934365   | 0.010891544 | 0.077948732 |
| pcaac320.pcaec382              | 0.024181296  | 0.013615736 | 0.077955871 |
| smc202.citruline               | 0.011518934  | 0.006485999 | 0.077957904 |
| pcaac342.pcaac366              | 0.026662666  | 0.015016375 | 0.078023589 |
| h1.pcaac362                    | -0.028936122 | 0.016297973 | 0.078045093 |
| pcaec340.transhydroxyproline   | 0.053658532  | 0.030227504 | 0.078092685 |
| lysopcac160.pcaec365           | 0.045589435  | 0.025684426 | 0.078121275 |
| glutamine.pcaac426             | -0.103559388 | 0.058380402 | 0.078305772 |
| pcaec406.pcaec402              | 0.141016723  | 0.079521757 | 0.078399317 |
| glutamicacid.ornithine         | -0.080317936 | 0.04529724  | 0.078429112 |
| pcaec365.pcaac405              | -0.060995717 | 0.034403947 | 0.078462907 |
| pcaec421.c182                  | -0.068355722 | 0.038570119 | 0.078576574 |
| pcaac363.asymmetricdimethylar; | 0.046275731  | 0.026116607 | 0.078636007 |
| kynurenine.lysopcac204         | 0.038809062  | 0.021908924 | 0.078720711 |
| c182.pcaac366                  | -0.023323851 | 0.013170098 | 0.078789394 |
| c51dc.asparagine               | 0.02121763   | 0.011980826 | 0.078790175 |

|                               |              |             |             |
|-------------------------------|--------------|-------------|-------------|
| c182.c3                       | 0.163041814  | 0.09208332  | 0.078852913 |
| serotonin.pcaac366            | -0.003742919 | 0.002114431 | 0.078921784 |
| pcaec384.smc160               | 0.236980719  | 0.133889156 | 0.078955467 |
| pcaec402.smohc222             | -0.017014467 | 0.009613768 | 0.078984723 |
| c162.lysine                   | 0.123998937  | 0.070071586 | 0.07901795  |
| alphaaminoadipicacid.pcaec403 | -0.074871893 | 0.042312493 | 0.079035565 |
| pcaec360.pcaec300             | -0.03020622  | 0.01707067  | 0.079038557 |
| pcaec405.pcaec381             | 0.08664347   | 0.048996736 | 0.079227802 |
| c5.smohc221                   | 0.120082478  | 0.067917144 | 0.079274592 |
| h1.citruline                  | 0.01870531   | 0.010582119 | 0.079348418 |
| lysopcac180.lysopcac203       | -0.027493928 | 0.015554192 | 0.079350416 |
| pcaac361.pcaac362             | 0.014980518  | 0.008475058 | 0.07935395  |
| pcaec300.smohc161             | -0.041729853 | 0.02361303  | 0.079414852 |
| pcaac341.alphaaminoadipicacid | 0.011905732  | 0.006737147 | 0.079425164 |
| pcaac403.pcaec300             | -0.031504075 | 0.017829554 | 0.079461991 |
| pcaec446.pcaec445             | 0.355949889  | 0.201465597 | 0.079488197 |
| lysopcac203.pcaac366          | 0.022641733  | 0.012821474 | 0.079636315 |
| smc161.smohc161               | 0.109142143  | 0.061822323 | 0.079721696 |
| pcaec406.c141oh               | -0.217264726 | 0.123112115 | 0.079830575 |
| pcaac344.pcaec300             | 0.029958441  | 0.016981644 | 0.079932827 |
| arginine.c18                  | -0.14042905  | 0.079602037 | 0.079937427 |
| pcaac426.pcaac362             | -0.01267185  | 0.007183294 | 0.079948674 |
| lysopcac281.leucine           | -0.07708215  | 0.043723712 | 0.080140825 |
| c181.pcaac366                 | -0.026646006 | 0.01512036  | 0.080255576 |
| lysopcac180.asymmetricdimethy | 0.037687596  | 0.021386738 | 0.080266666 |
| lysine.c182                   | -0.136254479 | 0.077355485 | 0.080400393 |
| pcaac343.pcaac362             | 0.014613475  | 0.008297061 | 0.080421391 |
| pcaac342.citruline            | 0.029303065  | 0.016646078 | 0.080578619 |
| lysopcac140.pcaec365          | 0.050025942  | 0.028419105 | 0.080589827 |
| c182.c162                     | 0.264772612  | 0.150421343 | 0.080604509 |
| pcaec406.pcaec340             | 0.142050022  | 0.080708759 | 0.080634152 |
| pcaac343.pcaac366             | 0.024587208  | 0.013969811 | 0.080635504 |
| c141oh.pcaec421               | 0.006963161  | 0.003956362 | 0.080641214 |
| lysopcac140.pcaac365          | -0.099004517 | 0.056255529 | 0.080655429 |
| pcaac320.alphaaminoadipicacid | 0.0111127    | 0.00631488  | 0.080679801 |
| lysopcac204.c8                | -0.118705041 | 0.067467684 | 0.080735811 |
| c0.pcaac361                   | -0.093445965 | 0.053118984 | 0.080779019 |
| pcaac406.pcaec446             | -0.135162463 | 0.076833756 | 0.080783685 |
| pcaac381.asymmetricdimethylar | 0.042932943  | 0.024407095 | 0.080804033 |
| pcaac240.pcaec421             | 0.017784287  | 0.010110655 | 0.080816058 |
| pcaec425.pcaec402             | -0.093472148 | 0.053147018 | 0.08085327  |
| acetylmithoine.lysopcac170    | -0.030716482 | 0.017469664 | 0.080933727 |
| c2.pcaac362                   | -0.014593896 | 0.008302576 | 0.081022639 |

|                                 |              |             |             |
|---------------------------------|--------------|-------------|-------------|
| pcaac362.pcaec363               | -0.060925271 | 0.034664421 | 0.081053677 |
| pcaac321.smc240                 | -0.071546306 | 0.04070744  | 0.081053741 |
| c182.pcaec402                   | -0.038625256 | 0.021977226 | 0.081064073 |
| pcaec401.lysine                 | 0.160793598  | 0.091509233 | 0.081129592 |
| serotonin.pcaac362              | -0.002203745 | 0.001254276 | 0.081154373 |
| pcaec300.c12                    | 0.095856258  | 0.054557517 | 0.081155877 |
| pcaac240.asparticacid           | -0.128972915 | 0.07340628  | 0.081156274 |
| pcaac341.pcaac366               | 0.0167506    | 0.009533944 | 0.08116149  |
| pcaac362.pcaac420               | -0.132489204 | 0.075409669 | 0.081164478 |
| c10.pcaec365                    | -0.047583456 | 0.027084512 | 0.081177274 |
| lysopcac182.pcaec300            | -0.016530232 | 0.009410803 | 0.081234557 |
| putrescine.c51                  | 0.201338544  | 0.11463371  | 0.081260687 |
| glutamicacid.c2                 | 0.153797999  | 0.087566525 | 0.081262075 |
| smc161.pcaec300                 | 0.007179779  | 0.004088196 | 0.081285099 |
| pcaec360.pcaac366               | 0.019536866  | 0.011127571 | 0.081371658 |
| h1.pcaec443                     | 0.117024871  | 0.066656549 | 0.081384937 |
| lysopcac204.smohc221            | -0.058905212 | 0.033554574 | 0.081408074 |
| pcaac320.pcaac366               | 0.030185299  | 0.017195601 | 0.081424631 |
| lysopcac281.c102                | 0.0837327    | 0.047704844 | 0.081456202 |
| pcaec365.pcaec300               | 0.011723849  | 0.00667942  | 0.081456984 |
| c102.pcaac405                   | 0.152974856  | 0.087159581 | 0.081475425 |
| pcaac321.pcaac366               | 0.018395705  | 0.010483683 | 0.081546469 |
| asymmetricdimethylarginine.glut | 0.087995723  | 0.050150959 | 0.081560528 |
| c16.pcaac405                    | 0.09276181   | 0.052871378 | 0.081583959 |
| smohc221.smc160                 | 0.190806109  | 0.108762515 | 0.081608647 |
| c182.pcaec383                   | 0.153945501  | 0.087760305 | 0.081639323 |
| c12.pcaec402                    | -0.105239365 | 0.060008409 | 0.081710739 |
| c2.pcaac344                     | -0.137056773 | 0.078165979 | 0.081768703 |
| lysopcac161.asymmetricdimethy   | 0.05008703   | 0.028571356 | 0.081830113 |
| pcaec321.pcaec360               | -0.016440286 | 0.009378886 | 0.081855399 |
| ornithine.pcaac320              | -0.09347581  | 0.053331616 | 0.08188573  |
| c4.creatinine                   | -0.036690416 | 0.02093422  | 0.081898711 |
| pcaac383.pcaec444               | 0.175707222  | 0.100259098 | 0.081919607 |
| c162.c3                         | 0.12272096   | 0.070032601 | 0.081952556 |
| creatinine.smohc221             | 0.102200663  | 0.058328004 | 0.081981723 |
| pcaec406.histidine              | -0.111214657 | 0.063487324 | 0.082052484 |
| pcaec342.pcaec300               | 0.008324052  | 0.004751894 | 0.082057354 |
| smohc222.c162                   | 0.163631484  | 0.09342266  | 0.082094543 |
| pcaac403.c18                    | 0.098703829  | 0.056353675 | 0.082096553 |
| pcaec446.lysopcac203            | -0.03046053  | 0.017391054 | 0.082096699 |
| lysopcac203.c18                 | 0.085118517  | 0.048599131 | 0.082107854 |
| pcaec420.glutamicacid           | 0.104400254  | 0.059609902 | 0.08211649  |
| pcaac361.smohc241               | 0.086077947  | 0.049153586 | 0.08214887  |

|                               |              |             |             |
|-------------------------------|--------------|-------------|-------------|
| alphaaminoadipicacid.pcaec404 | -0.026637692 | 0.015212274 | 0.082172738 |
| asparagine.pcaac362           | -0.030092935 | 0.017186326 | 0.082187358 |
| lysopcac280.smohc222          | -0.015646826 | 0.008939298 | 0.08229803  |
| pcaec420.c5                   | 0.031143593  | 0.017795332 | 0.082340054 |
| pcaac404.pcaac405             | -0.232905719 | 0.13308559  | 0.082349481 |
| pcaec405.pcaec406             | 0.075098135  | 0.042915959 | 0.082376559 |
| alanine.lysopcac203           | 0.042652199  | 0.024374286 | 0.082377115 |
| serotonin.pcaec300            | -0.01817595  | 0.010387932 | 0.082406079 |
| pcaac341.c181                 | -0.009157082 | 0.005233618 | 0.082415142 |
| c141.pcaac362                 | -0.02466069  | 0.014094737 | 0.082419912 |
| lysopcac160.pcaac362          | 0.014469343  | 0.00827029  | 0.082434003 |
| pcaec343.pcaec300             | 0.00791353   | 0.004523295 | 0.082442923 |
| pcaec321.pcaec300             | 0.009257756  | 0.00529268  | 0.08250245  |
| pcaac384.pcaec301             | 0.107814581  | 0.061656103 | 0.082592387 |
| pcaac342.pcaec300             | 0.01270073   | 0.007263677 | 0.082612857 |
| c16.pcaec365                  | 0.054760146  | 0.031319013 | 0.082623781 |
| pcaac344.transhydroxyproline  | 0.0503688    | 0.028809712 | 0.082647447 |
| smc202.pcaec300               | 0.005627017  | 0.00321975  | 0.08276403  |
| c181.lysopcac182              | -0.042037267 | 0.024054746 | 0.082779699 |
| c3.creatinine                 | -0.027534925 | 0.015768377 | 0.083015642 |
| lysopcac203.pcaac362          | 0.013404388  | 0.007676493 | 0.083024607 |
| c3.lysopcac204                | 0.096588133  | 0.055316359 | 0.083034381 |
| pcaec301.pcaac362             | 0.009810066  | 0.005618388 | 0.083041398 |
| pcaec385.prolinr              | 0.038885579  | 0.022270986 | 0.083049152 |
| c101.smc160                   | -0.106472479 | 0.060987459 | 0.083085833 |
| lysopcac160.pcaac366          | 0.024079921  | 0.013794508 | 0.08311951  |
| asparticacid.pcaec423         | -0.090353545 | 0.051760472 | 0.083120806 |
| serine.pcaac366               | 0.044617658  | 0.025562217 | 0.083147971 |
| alanine.pcaac405              | 0.055575149  | 0.031843506 | 0.08318201  |
| methionine.spermidine         | -0.1213403   | 0.069525847 | 0.083182697 |
| pcaec425.serotonin            | -0.223658705 | 0.128158227 | 0.083196361 |
| pcaec381.smohc222             | -0.034393229 | 0.019709968 | 0.083233065 |
| pcaac360.transhydroxyproline  | 0.134522921  | 0.077096894 | 0.083252462 |
| c18.lysopcac280               | 0.068512782  | 0.039269044 | 0.083279241 |
| asparticacid.pcaec365         | 0.045650755  | 0.026166808 | 0.083296144 |
| alanine.pcaac366              | 0.020613033  | 0.011816525 | 0.083327835 |
| pcaec444.lysopcac180          | -0.085762378 | 0.04917288  | 0.083384706 |
| pcaec322.pcaec360             | -0.01520427  | 0.00871786  | 0.083395594 |
| smc181.pcaec300               | 0.007661073  | 0.004393094 | 0.083421274 |
| c16.putrescine                | -0.085333649 | 0.048934105 | 0.083428643 |
| c12.c101                      | -0.047221788 | 0.027079984 | 0.083438935 |
| pcaec385.pcaec361             | -0.0190396   | 0.010918625 | 0.083441844 |
| pcaac406.asymmetricdimethylar | 0.033107436  | 0.018986285 | 0.083444893 |

|                               |              |             |             |
|-------------------------------|--------------|-------------|-------------|
| pcaec386.pcaac361             | 0.170469563  | 0.097772623 | 0.083484252 |
| pcaac425.pcaec443             | -0.075890832 | 0.043530328 | 0.083506903 |
| pcaec384.pcaac362             | -0.010524894 | 0.006037903 | 0.083553141 |
| lysopcac203.pcaec300          | -0.009837272 | 0.005643529 | 0.083558574 |
| pcaec342.smohc221             | 0.034055702  | 0.019541859 | 0.083628928 |
| pcaac344.alphaaminoadipicacid | 0.009921478  | 0.005696077 | 0.083786328 |
| asparticacid.citruline        | 0.012165454  | 0.00698457  | 0.083794654 |
| ornithine.pcaac362            | 0.018007334  | 0.01034109  | 0.083869069 |
| pcaac385.pcaec300             | 0.007958403  | 0.004570598 | 0.08389038  |
| pcaac321.asparagine           | 0.0151723    | 0.008714871 | 0.0839344   |
| pcaac240.pcaac362             | 0.01482749   | 0.008517711 | 0.083966638 |
| pcaec383.pcaec300             | -0.066969486 | 0.038476936 | 0.084014816 |
| acetylmornithoine.pcaac362    | 0.015239829  | 0.008756164 | 0.084022076 |
| asparticacid.lysopcac203      | 0.016209708  | 0.009314035 | 0.08404246  |
| lysopcac204.pcaac426          | -0.119253043 | 0.068531142 | 0.084081867 |
| isoleucine.c141               | -0.07024548  | 0.040368545 | 0.084086254 |
| c102.smohc221                 | 0.055327077  | 0.031797344 | 0.084106315 |
| pcaec423.pcaec421             | 0.014099457  | 0.008104775 | 0.084166677 |
| pcaac422.smc240               | -0.075343841 | 0.0433185   | 0.084228195 |
| lysopcac281.smohc222          | -0.011955545 | 0.006874053 | 0.084240792 |
| pcaec301.pcaac361             | 0.037666751  | 0.021658564 | 0.084260597 |
| pcaac363.pcaec300             | 0.008309803  | 0.004778266 | 0.084266316 |
| pcaac366.pcaec443             | -0.11537946  | 0.066363693 | 0.0843529   |
| lysopcac160.pcaec300          | -0.017613806 | 0.010135195 | 0.084478021 |
| lysopcac203.pcaec381          | 0.033101308  | 0.019048264 | 0.08450023  |
| pcaec385.pcaec300             | 0.008055911  | 0.004636076 | 0.08451839  |
| lysopcac281.citruline         | 0.013193195  | 0.007593362 | 0.084552547 |
| pcaac425.tyrosine             | -0.130476944 | 0.075097532 | 0.084558033 |
| lysine.pcaac366               | 0.026668501  | 0.015349455 | 0.084559773 |
| pcaac364.pcaac362             | -0.013206026 | 0.007601117 | 0.084567542 |
| pcaac426.pcaac422             | -0.06950153  | 0.040013092 | 0.084640111 |
| pcaec383.ornithine            | -0.088601082 | 0.051015966 | 0.08468216  |
| h1.pcaec402                   | 0.057360823  | 0.033031133 | 0.084711222 |
| c16.c181                      | -0.054809652 | 0.031570032 | 0.084789147 |
| lysopcac204.pcaac380          | 0.145340712  | 0.083719917 | 0.084805829 |
| pcaac384.c182                 | -0.050993117 | 0.029384075 | 0.084918632 |
| lysopcac140.pcaec421          | -0.011587549 | 0.006677746 | 0.084945468 |
| pcaac363.pcaec405             | 0.131273719  | 0.075658639 | 0.084975617 |
| smc260.pcaac366               | 0.018209777  | 0.010496008 | 0.08500316  |
| methionine.pcaec404           | 0.027551485  | 0.015883753 | 0.085066087 |
| pcaec424.pcaec365             | 0.046913572  | 0.027050144 | 0.085110844 |
| pcaec445.pcaec300             | 0.012218511  | 0.00704627  | 0.08516055  |
| histidine.smohc141            | -0.073854514 | 0.042594169 | 0.085183362 |

|                                |              |             |             |
|--------------------------------|--------------|-------------|-------------|
| c0.glutamine                   | -0.046695245 | 0.026933305 | 0.085214571 |
| methionine.c12                 | -0.10969361  | 0.063286039 | 0.085292536 |
| pcaec363.pcaac363              | -0.053501455 | 0.030873423 | 0.085358443 |
| smohc222.c14                   | -0.059917619 | 0.034588281 | 0.085468989 |
| asymmetricdimethylarginine.pca | -0.088498401 | 0.051087745 | 0.085473886 |
| putrescine.lysopcac182         | -0.030116781 | 0.017389008 | 0.085534399 |
| pcaec401.smohc241              | 0.107989008  | 0.062355376 | 0.08555443  |
| pcaac425.citruline             | 0.013029642  | 0.007524228 | 0.085579445 |
| pcaac383.pcaac323              | -0.145293798 | 0.083906426 | 0.085592773 |
| c141oh.pcaec360                | -0.015544534 | 0.008977246 | 0.08560509  |
| pcaec386.pcaec300              | 0.011911421  | 0.00687923  | 0.085612836 |
| pcaec405.asparagine            | 0.03533517   | 0.020412957 | 0.085700157 |
| lysopcac280.pcaac344           | -0.106871926 | 0.061745922 | 0.085732915 |
| pcaec406.pcaec300              | 0.011455856  | 0.006619028 | 0.085748633 |
| smc202.pcaec301                | 0.11826083   | 0.06834955  | 0.085840046 |
| pcaec342.pcaec443              | -0.073808826 | 0.042668008 | 0.085910989 |
| pcaac342.smc202                | 0.055380526  | 0.032015634 | 0.085918813 |
| c141.pcaec403                  | 0.051287024  | 0.029649184 | 0.085918974 |
| pcaac361.pcaac366              | 0.024608782  | 0.0142289   | 0.085973249 |
| pcaec301.lysopcac280           | -0.019443625 | 0.011245213 | 0.086051329 |
| serine.citruline               | 0.010497963  | 0.006072071 | 0.086080895 |
| pcaac404.c18                   | 0.085668134  | 0.04955176  | 0.086086601 |
| c181.pcaec383                  | 0.16991784   | 0.098289461 | 0.086106765 |
| leucine.pcaec403               | -0.155028144 | 0.0896882   | 0.086147382 |
| smc241.c142                    | 0.070891501  | 0.041016229 | 0.086173706 |
| pcaec404.pcaac362              | 0.024249362  | 0.014030933 | 0.086191364 |
| c5.pcaac362                    | 0.064661619  | 0.037414401 | 0.086195648 |
| pcaec383.pcaec365              | 0.041939247  | 0.024270024 | 0.086236698 |
| pcaec343.pcaac361              | 0.135188829  | 0.078242146 | 0.086272755 |
| pcaac383.pcaac362              | 0.062682364  | 0.036278232 | 0.086273328 |
| pcaec401.pcaec443              | -0.092867853 | 0.053749754 | 0.086280726 |
| pcaac422.pcaac366              | 0.04825812   | 0.027934776 | 0.086326353 |
| smohc241.valine                | -0.078966729 | 0.045716256 | 0.086363389 |
| pcaec421.pcaec443              | -0.135026351 | 0.078177205 | 0.086388536 |
| c141oh.asparagine              | -0.027519891 | 0.015933873 | 0.08639787  |
| pcaec301.pcaac366              | 0.016343039  | 0.009462755 | 0.086405158 |
| pcaec342.citruline             | 0.017455223  | 0.010107054 | 0.086415458 |
| pcaac322.lysopcac203           | 0.027265818  | 0.015788965 | 0.086441228 |
| serine.asparticacid            | 0.05727728   | 0.033171873 | 0.08647884  |
| c51dc.tyrosine                 | 0.096553812  | 0.055919041 | 0.086480757 |
| pcaac364.citruline             | 0.008034038  | 0.004653873 | 0.086545508 |
| pcaec380.pcaec443              | -0.181063386 | 0.104895429 | 0.086578022 |
| pcaac424.pcaac362              | 0.037647674  | 0.02181117  | 0.0865887   |



|                                |              |             |             |
|--------------------------------|--------------|-------------|-------------|
| pcaac322.pcaec365              | 0.052200236  | 0.030242511 | 0.086591977 |
| pcaac403.smohc221              | -0.122019409 | 0.070694057 | 0.086598151 |
| pcaec421.pcaac405              | -0.097582354 | 0.056542951 | 0.086636316 |
| pcaec384.glycine               | 0.059817213  | 0.034662021 | 0.086651045 |
| pcaec364.pcaec300              | 0.016408676  | 0.009509006 | 0.086675359 |
| pcaec363.c181                  | -0.017564147 | 0.010178971 | 0.086686284 |
| pcaec360.pcaec340              | 0.04364347   | 0.025293298 | 0.086693027 |
| phenylalanine.pcaec401         | 0.10060143   | 0.058304695 | 0.086702486 |
| c142.pcaac405                  | -0.117839076 | 0.06829707  | 0.086712083 |
| pcaec382.pcaec423              | -0.04745217  | 0.027502443 | 0.086713844 |
| pcaec385.pcaec421              | 0.001880322  | 0.001090419 | 0.086890358 |
| alphaaminoadipicacid.pcaac366  | -0.033120878 | 0.019211587 | 0.086962569 |
| lysopcac204.smc160             | -0.123012634 | 0.071369654 | 0.087036273 |
| lysopcac203.lysopcac204        | -0.074463839 | 0.043202704 | 0.087037452 |
| pcaec405.pcaac405              | -0.090957399 | 0.052779408 | 0.08708132  |
| c4.asymmetricdimethylarginine  | 0.048737989  | 0.028287445 | 0.087153025 |
| prolinr.pcaec362               | -0.021576356 | 0.012523259 | 0.087162482 |
| pcaac421.pcaac366              | 0.039654499  | 0.023016991 | 0.087174596 |
| c51.lysopcac204                | 0.034722079  | 0.020156204 | 0.087208386 |
| pcaac344.pcaec365              | 0.058588208  | 0.034011566 | 0.08721804  |
| c102.lysopcac204               | 0.061959772  | 0.035972917 | 0.087253638 |
| c181.pcaac405                  | 0.111901007  | 0.064972712 | 0.087276084 |
| pcaac404.pcaac362              | 0.018731148  | 0.010877714 | 0.08733103  |
| methionine.prolinr             | -0.046729367 | 0.027142112 | 0.087389039 |
| pcaac281.pcaac362              | -0.009577844 | 0.005563949 | 0.087433481 |
| pcaac406.smc160                | -0.107077548 | 0.062203432 | 0.087433878 |
| pcaac363.pcaac362              | -0.039021902 | 0.022668821 | 0.087437173 |
| pcaec446.pcaec300              | 0.008715425  | 0.005063778 | 0.087484459 |
| pcaac320.c5                    | 0.01523211   | 0.008850859 | 0.087512824 |
| c51.pcaec421                   | -0.006373923 | 0.003704024 | 0.087542872 |
| pcaac322.pcaec300              | 0.019389462  | 0.011267851 | 0.087548871 |
| smc161.citruline               | 0.010714816  | 0.006227077 | 0.087566304 |
| pcaac323.smc202                | 0.109467681  | 0.063620327 | 0.087573869 |
| asymmetricdimethylarginine.pca | 0.004743668  | 0.002758112 | 0.087709388 |
| pcaec423.pcaac366              | 0.039868527  | 0.023182099 | 0.087727365 |
| lysopcac280.smc202             | 0.071117096  | 0.041355611 | 0.087754724 |
| lysopcac180.pcaec362           | 0.05218333   | 0.030348555 | 0.08778782  |
| pcaec406.pcaac405              | -0.078607409 | 0.045718496 | 0.087803884 |
| histidine.pcaac424             | -0.063132331 | 0.036719748 | 0.087817915 |
| pcaec321.c2                    | -0.075722637 | 0.044058528 | 0.087930989 |
| c102.smc202                    | -0.125829753 | 0.073213836 | 0.087935014 |
| pcaec300.smc202                | 0.065981974  | 0.038398038 | 0.087988488 |
| glutamine.spermidine           | -0.115468085 | 0.067197489 | 0.087993803 |

|                                |              |             |             |
|--------------------------------|--------------|-------------|-------------|
| asparticacid.smohc222          | -0.010066972 | 0.005859118 | 0.088024422 |
| citruline.c181                 | -0.021670947 | 0.012613149 | 0.088033286 |
| putrescine.c5                  | 0.021418374  | 0.012467872 | 0.088076871 |
| leucine.asparagine             | 0.017131947  | 0.009972995 | 0.088086324 |
| pcaec362.pcaac366              | -0.045770302 | 0.026649744 | 0.088151756 |
| pcaec322.pcaec300              | 0.005397259  | 0.003142596 | 0.088156189 |
| pcaec421.pcaec300              | -0.052600235 | 0.030629212 | 0.088179911 |
| lysopcac203.asymmetricdimethy  | 0.041632777  | 0.024249108 | 0.088261241 |
| smohc241.pcaac366              | 0.031580878  | 0.01839437  | 0.088261484 |
| serotonin.glutamicacid         | -0.071534435 | 0.041674167 | 0.088327488 |
| pcaec364.citruline             | 0.01195117   | 0.006962951 | 0.08835005  |
| pcaec403.pcaec402              | -0.261582707 | 0.152419387 | 0.088385073 |
| c3.c5                          | 0.060500317  | 0.035258132 | 0.088436194 |
| glutamicacid.asymmetricdimethy | -0.038260569 | 0.022298372 | 0.088450757 |
| pcaac360.lysopcac182           | -0.026330309 | 0.015346341 | 0.088470462 |
| pcaec343.smohc221              | 0.032143324  | 0.018743291 | 0.088620142 |
| pcaac404.pcaec445              | 0.048133336  | 0.028068762 | 0.0886363   |
| pcaac384.pcaac366              | -0.008289564 | 0.004834045 | 0.088637546 |
| pcaec421.pcaac366              | 0.036792792  | 0.021458335 | 0.088676961 |
| pcaac420.pcaac366              | 0.04428348   | 0.025829572 | 0.088707623 |
| isoleucine.pcaac366            | 0.029896202  | 0.017441305 | 0.088771221 |
| pcaac380.c101                  | -0.056978227 | 0.033257704 | 0.088931504 |
| pcaac380.pcaec421              | 0.003550601  | 0.002072658 | 0.088962425 |
| pcaac405.pcaec300              | 0.012100877  | 0.007067596 | 0.089129245 |
| lysopcac180.alphaaminoadipicac | -0.007027049 | 0.004104585 | 0.08915935  |
| c162.citruline                 | 0.012195546  | 0.007124792 | 0.089213786 |
| c5.c14                         | 0.085432376  | 0.049912097 | 0.089222831 |
| pcaec386.kynurenine            | -0.013142192 | 0.007678194 | 0.089228626 |
| pcaac424.pcaac405              | -0.080700713 | 0.047149254 | 0.089233129 |
| pcaac404.transhydroxyproline   | 0.051444085  | 0.030056803 | 0.089240334 |
| pcaec383.pcaec405              | 0.284039263  | 0.165967284 | 0.089267143 |
| arginine.c2                    | 0.111933833  | 0.065407729 | 0.089284339 |
| leucine.pcaec300               | -0.027463472 | 0.016053536 | 0.089391982 |
| pcaec321.pcaac402              | -0.123547911 | 0.072236381 | 0.089468847 |
| pcaec341.transhydroxyproline   | 0.041679769  | 0.024377352 | 0.089571567 |
| serotonin.pcaec405             | 0.093478915  | 0.054676505 | 0.089590446 |
| smc161.asymmetricdimethylargi  | -0.130712861 | 0.07646667  | 0.089639236 |
| smc241.pcaec322                | -0.146405543 | 0.085647292 | 0.089640887 |
| pcaac320.pcaac426              | 0.098558758  | 0.057659418 | 0.089654712 |
| pcaec360.putrescine            | -0.074830457 | 0.043781981 | 0.089685391 |
| c0.pcaec404                    | -0.029611339 | 0.017328358 | 0.089745602 |
| pcaec321.pcaac366              | 0.01527988   | 0.008941721 | 0.089746915 |
| alanine.pcaec362               | -0.02773434  | 0.016230937 | 0.089764891 |

|                      |              |             |             |
|----------------------|--------------|-------------|-------------|
| pcaec363.pcaec300    | 0.007785739  | 0.004557584 | 0.089844683 |
| c10.smc160           | -0.124278395 | 0.072755028 | 0.089868498 |
| pcaec384.kynurenine  | -0.038987922 | 0.022825661 | 0.089887453 |
| asparagine.citruline | 0.008405888  | 0.004923321 | 0.090020187 |
| c3.c18               | -0.070480329 | 0.041284082 | 0.090049587 |
| pcaac343.pcaec300    | 0.010525316  | 0.00616572  | 0.090074418 |
| pcaac363.citruline   | 0.011344376  | 0.006645765 | 0.090085977 |
| pcaec445.pcaec446    | 0.26800274   | 0.157003825 | 0.090090824 |
| h1.ornithine         | 0.121442374  | 0.071146515 | 0.090099897 |
| alanine.pcaac322     | 0.113416495  | 0.066450703 | 0.090129191 |
| pcaec321.smohc221    | 0.03667857   | 0.021490272 | 0.090133713 |
| lysopcac280.smohc221 | -0.044671859 | 0.026176865 | 0.090173348 |
| c51dc.pcaac426       | 0.115249901  | 0.067535431 | 0.090178854 |
| pcaec300.pcaac281    | -0.008647335 | 0.005067551 | 0.090196982 |
| pcaac404.pcaec300    | 0.064769442  | 0.037956845 | 0.090200003 |
| pcaac323.pcaec300    | 0.003286367  | 0.001926087 | 0.090229262 |
| c12.valine           | 0.095375801  | 0.055916682 | 0.090334404 |
| c8.c2                | 0.102107982  | 0.05988577  | 0.090452397 |
| pcaac380.pcaec300    | 0.013771462  | 0.008077063 | 0.090459341 |
| pcaec384.pcaac366    | -0.017247008 | 0.010117195 | 0.090512916 |
| pcaec361.pcaec360    | -0.015913878 | 0.009336446 | 0.090556423 |
| pcaec443.ornithine   | -0.126297715 | 0.074100903 | 0.090572904 |
| prolinr.pcaac362     | 0.031036316  | 0.018209846 | 0.090578862 |
| c101.pcaac405        | 0.111382775  | 0.065352916 | 0.090586818 |
| creatinine.pcaec341  | 0.149141426  | 0.087510044 | 0.090596129 |
| serine.pcaec300      | -0.024564866 | 0.014414678 | 0.09061886  |
| c141.pcaac320        | -0.176191377 | 0.103406861 | 0.09067338  |
| serotonin.smohc161   | 0.011939371  | 0.007007242 | 0.090674105 |
| pcaec384.pcaec405    | 0.142627232  | 0.083710189 | 0.090681589 |
| smohc161.citruline   | 0.035505471  | 0.020845155 | 0.090780119 |
| pcaec445.c51         | 0.135804273  | 0.07974756  | 0.09084938  |
| pcaac364.pcaac341    | 0.055944414  | 0.03285667  | 0.090895649 |
| pcaac406.pcaec300    | 0.018249115  | 0.010718161 | 0.090904223 |
| lysopcac170.pcaec421 | -0.012716549 | 0.007469705 | 0.090945249 |
| pcaac384.citruline   | 0.004573151  | 0.002686435 | 0.090964832 |
| pcaac420.lysopcac203 | -0.052595615 | 0.030899371 | 0.090993792 |
| citruline.pcaec300   | 0.008763458  | 0.005148754 | 0.091013307 |
| isoleucine.pcaec385  | 0.105248511  | 0.061841063 | 0.091038644 |
| pcaac322.lysopcac280 | 0.013919181  | 0.008179495 | 0.091076821 |
| smc181.pcaec385      | -0.09445258  | 0.055508296 | 0.09109987  |
| asparticacid.smc240  | -0.129754424 | 0.076280329 | 0.091207745 |
| pcaec341.pcaac366    | 0.027609475  | 0.016233596 | 0.09125657  |
| pcaec424.pcaec402    | -0.095258513 | 0.056015368 | 0.091291112 |

|                             |              |             |             |
|-----------------------------|--------------|-------------|-------------|
| smc240.asparticacid         | 0.041572463  | 0.024447097 | 0.091304502 |
| pcaac425.pcaec382           | 0.023110636  | 0.013596185 | 0.091440052 |
| smc180.pcaec300             | 0.046833357  | 0.027558923 | 0.091515237 |
| pcaac360.citruline          | 0.012674503  | 0.00745965  | 0.091574781 |
| smc180.c162                 | 0.200228273  | 0.117858443 | 0.091610093 |
| pcaac300.pcaac281           | -0.007980513 | 0.004698705 | 0.091692983 |
| pcaac364.pcaac405           | -0.097633571 | 0.057495945 | 0.091760029 |
| alphaaminoadipicacid.valine | -0.124267746 | 0.073187273 | 0.091788963 |
| pcaec401.pcaac405           | -0.095161105 | 0.056054759 | 0.091845112 |
| pcaac425.pcaec445           | 0.172656816  | 0.101707824 | 0.091858159 |
| c162.pcaec401               | -0.080629975 | 0.047509445 | 0.091941682 |
| pcaac240.pcaac366           | 0.024394943  | 0.014375693 | 0.091975426 |
| histidine.kynurenine        | -0.022714025 | 0.013386746 | 0.092013897 |
| c51dc.pcaec360              | 0.006704053  | 0.003951264 | 0.09202702  |
| pcaec446.lysopcac182        | -0.076467596 | 0.045072377 | 0.092052508 |
| leucine.c141                | -0.052731687 | 0.031081928 | 0.092054921 |
| smohc221.citruline          | 0.012465674  | 0.007347767 | 0.092057401 |
| smc240.putrescine           | -0.041698717 | 0.02458267  | 0.092106867 |
| creatinine.glutamine        | 0.021084432  | 0.01243124  | 0.092141113 |
| c51dc.pcaec402              | 0.077200097  | 0.045520306 | 0.092166897 |
| pcaac404.c8                 | -0.071428878 | 0.042117897 | 0.092170992 |
| smc180.alphaaminoadipicacid | -0.033644808 | 0.019839105 | 0.092179276 |
| pcaac320.pcaec443           | -0.031359333 | 0.018491864 | 0.092186584 |
| smc160.pcaec443             | -0.071704637 | 0.042284792 | 0.092203703 |
| pcaac361.pcaec365           | 0.048275071  | 0.028470771 | 0.092232906 |
| pcaec423.pcaec443           | -0.086724577 | 0.051150157 | 0.092254028 |
| pcaac425.serotonin          | -0.158162823 | 0.09328528  | 0.092256941 |
| pcaec405.smohc221           | 0.107123299  | 0.063187897 | 0.092287548 |
| pcaec365.citruline          | 0.007630018  | 0.00450139  | 0.092340318 |
| smohc222.pcaac405           | -0.079246557 | 0.046755081 | 0.092360622 |
| putrescine.pcaac362         | 0.007242758  | 0.004273935 | 0.092416714 |
| pcaec404.pcaec365           | 0.045704984  | 0.026976937 | 0.092494795 |
| pcaec365.pcaac381           | 0.067435133  | 0.039805208 | 0.092513083 |
| pcaec365.kynurenine         | -0.017924071 | 0.010580446 | 0.092523201 |
| lysopcac181.pcaac403        | 0.035418033  | 0.020908813 | 0.092551171 |
| lysopcac140.pcaec300        | -0.019434678 | 0.011476899 | 0.092656952 |
| pcaec405.c12                | 0.11402695   | 0.067346738 | 0.092702939 |
| pcaac385.pcaac366           | -0.010906054 | 0.006444559 | 0.092864076 |
| pcaec343.citruline          | 0.020098802  | 0.011877904 | 0.092896887 |
| lysopcac204.pcaec300        | -0.014107714 | 0.008340371 | 0.093015394 |
| pcaac426.citruline          | 0.009041287  | 0.005345169 | 0.093017256 |
| pcaac363.c182               | -0.051367388 | 0.030369848 | 0.093035072 |
| c181.histidine              | -0.132824685 | 0.078533152 | 0.093049303 |

|                                |              |             |             |
|--------------------------------|--------------|-------------|-------------|
| pcaec364.tyrosine              | -0.089224567 | 0.052759833 | 0.093082643 |
| lysopcac281.asparagine         | 0.016492573  | 0.009752983 | 0.093105067 |
| c141oh.smc261                  | 0.139479966  | 0.082485161 | 0.093116212 |
| pcaec383.smohc222              | -0.018293303 | 0.010818315 | 0.093118805 |
| pcaec401.smc240                | -0.044539097 | 0.026340927 | 0.093135339 |
| smc202.pcaec340                | 0.040089447  | 0.023710999 | 0.093157822 |
| smc180.citruline               | 0.011850681  | 0.007009504 | 0.093175861 |
| pcaac362.c181                  | -0.015402264 | 0.009110319 | 0.093179619 |
| smc261.glutamicacid            | 0.07896745   | 0.046710788 | 0.09319458  |
| c162.pcaac366                  | -0.125893226 | 0.074495671 | 0.093313664 |
| pcaec385.citruline             | 0.006731412  | 0.003983801 | 0.093360546 |
| pcaac404.pcaac402              | -0.118775682 | 0.070311438 | 0.093440433 |
| pcaec364.spermidine            | -0.115062983 | 0.068134812 | 0.093541288 |
| c2.asparticacid                | 0.053771024  | 0.031844036 | 0.093575946 |
| c182.pcaec405                  | -0.081869264 | 0.048486018 | 0.093587779 |
| c5.c16                         | -0.114283981 | 0.067690238 | 0.093621457 |
| pcaec382.smohc221              | -0.130916612 | 0.077552617 | 0.093667087 |
| pcaec425.lysopcac161           | 0.127101991  | 0.075298589 | 0.093691609 |
| creatinine.pcaac363            | 0.037719388  | 0.02234636  | 0.093697346 |
| pcaac380.pcaac405              | -0.068027705 | 0.040308533 | 0.093748982 |
| lysopcac203.smohc221           | -0.039178938 | 0.023215828 | 0.09376421  |
| pcaec365.lysopcac182           | -0.043599768 | 0.025838929 | 0.093808217 |
| c51dc.pcaec361                 | -0.023544238 | 0.013954569 | 0.093839254 |
| pcaac381.c101                  | -0.043285842 | 0.025657501 | 0.093866728 |
| lysopcac204.c2                 | 0.087890654  | 0.052098079 | 0.093874609 |
| pcaec404.pcaec406              | 0.057525592  | 0.034099126 | 0.093876962 |
| c10.glutamine                  | 0.062233586  | 0.036891537 | 0.093891766 |
| c10.pcaec300                   | -0.034337098 | 0.020366552 | 0.094080566 |
| pcaec424.pcaec342              | 0.174871946  | 0.103735769 | 0.094121399 |
| pcaec341.pcaec443              | -0.039595667 | 0.02348914  | 0.094129696 |
| pcaec362.asymmetricdimethylar; | 0.034316041  | 0.020357486 | 0.09413532  |
| pcaac342.c142                  | 0.04352429   | 0.025824531 | 0.094190658 |
| pcaec445.pcaac366              | 0.024151655  | 0.014330455 | 0.094199905 |
| asparticacid.pcaec322          | -0.073362718 | 0.043534426 | 0.094233168 |
| pcaac380.asparagine            | -0.020904555 | 0.012406183 | 0.094263056 |
| pcaec406.citruline             | 0.008545506  | 0.005072344 | 0.094318363 |
| pcaac380.histidine             | -0.096989304 | 0.057577558 | 0.094362248 |
| smc202.pcaac366                | -0.014671171 | 0.008709641 | 0.094366788 |
| c182.c16                       | 0.099730436  | 0.059209012 | 0.094385298 |
| smc161.pcaec362                | 0.023540964  | 0.013978662 | 0.094446335 |
| pcaac425.pcaac361              | 0.076986591  | 0.045730235 | 0.094556765 |
| c101.c181                      | -0.028415297 | 0.01688151  | 0.094609941 |
| pcaac281.pcaec300              | 0.014911753  | 0.008859462 | 0.094624659 |

|                                |              |             |             |
|--------------------------------|--------------|-------------|-------------|
| c141.pcaec406                  | -0.086256638 | 0.051250891 | 0.094647387 |
| smc181.c182                    | 0.044271937  | 0.026305252 | 0.094651179 |
| smc161.c142                    | 0.074532815  | 0.044296575 | 0.094732933 |
| pcaec384.spermidine            | -0.116274114 | 0.069107851 | 0.094749277 |
| lysopcac182.pcaac281           | 0.003176629  | 0.001889046 | 0.094923657 |
| pcaac424.pcaec401              | 0.152434911  | 0.090671607 | 0.095007162 |
| pcaac384.pcaac422              | -0.089751175 | 0.053394487 | 0.095059465 |
| smohc161.alphaaminoadipicacid  | -0.014702446 | 0.008752141 | 0.095261876 |
| c101.c10                       | -0.046659839 | 0.027783232 | 0.095348537 |
| c10.lysopcac180                | -0.114048905 | 0.067911493 | 0.09535807  |
| pcaac240.pcaec423              | 0.085807418  | 0.051101342 | 0.095399825 |
| pcaec340.smohc241              | 0.138001527  | 0.082188242 | 0.095413668 |
| pcaac362.prolinr               | 0.048218844  | 0.028717538 | 0.095417158 |
| pcaac383.transhydroxyproline   | 0.038044781  | 0.022659805 | 0.095440318 |
| pcaac426.c181                  | -0.013440204 | 0.008006275 | 0.09548832  |
| pcaec404.pcaec424              | -0.08251129  | 0.049152525 | 0.09549422  |
| pcaec424.ornithine             | -0.05831692  | 0.034745451 | 0.095547805 |
| serotonin.c141oh               | 0.203892567  | 0.121536538 | 0.095700586 |
| asymmetricdimethylarginine.smc | 0.019055309  | 0.011360055 | 0.095745184 |
| putrescine.pcaec300            | -0.013839835 | 0.008253087 | 0.095836794 |
| c18.pcaec402                   | -0.042667996 | 0.025453941 | 0.095963449 |
| smohc241.pcaec300              | -0.009829084 | 0.005863745 | 0.095970477 |
| acetylornithoine.pcaac323      | 0.184014282  | 0.109796197 | 0.096026307 |
| smc180.smc202                  | 0.108273443  | 0.064608353 | 0.096049759 |
| acetylornithoine.citruline     | 0.022771628  | 0.013588372 | 0.096054794 |
| glutamine.pcaac362             | -0.019223699 | 0.011472179 | 0.096081768 |
| pcaac383.c16                   | 0.083607103  | 0.049895671 | 0.096089902 |
| pcaac300.pcaec301              | -0.111657926 | 0.066642738 | 0.096122934 |
| lysopcac280.pcaac366           | 0.013728203  | 0.008194263 | 0.09614791  |
| leucine.pcaac366               | 0.037085326  | 0.022138956 | 0.096192505 |
| pcaec385.pcaac362              | -0.035437955 | 0.021160537 | 0.096270625 |
| pcaac383.citruline             | 0.007557856  | 0.004513383 | 0.096305155 |
| c3.c142                        | -0.108343231 | 0.06470049  | 0.096306855 |
| c141.pcaec300                  | -0.021897064 | 0.013076508 | 0.096306931 |
| smohc221.lysopcac180           | 0.08889005   | 0.053084903 | 0.09631603  |
| pcaac366.citruline             | 0.024693669  | 0.014748449 | 0.096348547 |
| putrescine.pcaec404            | 0.031127988  | 0.018591622 | 0.096352715 |
| pcaec403.asparagine            | 0.028582457  | 0.017071478 | 0.096356779 |
| c162.smohc241                  | -0.092111243 | 0.055019305 | 0.096380222 |
| lysopcac180.pcaec404           | 0.044991795  | 0.026888063 | 0.096550126 |
| pcaac404.pcaac422              | -0.071328679 | 0.042632717 | 0.096590124 |
| pcaec380.glutamicacid          | 0.132616605  | 0.079271645 | 0.096621383 |
| spermidine.c16                 | 0.209462354  | 0.125232077 | 0.096689526 |

|                               |              |             |             |
|-------------------------------|--------------|-------------|-------------|
| pcaec360.lysopcac182          | -0.027818836 | 0.016633887 | 0.096723875 |
| pcaac362.pcaec444             | 0.208979517  | 0.124957213 | 0.096726031 |
| creatinine.serotonin          | 0.131210369  | 0.078462906 | 0.096755405 |
| lysopcac204.c181              | 0.031107418  | 0.018602108 | 0.096756897 |
| c2.c101                       | -0.024956088 | 0.014923864 | 0.096761896 |
| pcaec386.citruline            | 0.005627989  | 0.003366848 | 0.096887841 |
| lysopcac160.asymmetricdimethy | 0.043375703  | 0.025949689 | 0.096899508 |
| smohc221.c12                  | 0.112049835  | 0.067034377 | 0.096900069 |
| smc181.pcaec361               | -0.016220518 | 0.00970427  | 0.096909048 |
| pcaec422.pcaac366             | 0.032771874  | 0.019607104 | 0.096919723 |
| pcaec423.pcaac420             | -0.214876627 | 0.128572926 | 0.096956396 |
| smohc141.pcaac281             | 0.034196649  | 0.020463534 | 0.096984368 |
| pcaec384.pcaec322             | 0.179517926  | 0.107440177 | 0.097031445 |
| c182.pcaec404                 | -0.016011181 | 0.009582928 | 0.09704362  |
| pcaec343.smohc161             | 0.016675468  | 0.009980659 | 0.097048426 |
| smc261.citruline              | 0.012755449  | 0.007634501 | 0.097051276 |
| smohc222.citruline            | 0.006513272  | 0.003899003 | 0.097104182 |
| kynurenine.pcaac344           | -0.0607188   | 0.036349315 | 0.09711842  |
| pcaac363.pcaec382             | 0.01546759   | 0.009260274 | 0.097139874 |
| pcaec322.pcaec421             | 0.004155642  | 0.002487953 | 0.097142057 |
| smc260.c182                   | 0.073649226  | 0.044094885 | 0.097154221 |
| c162.pcaec403                 | 0.047737642  | 0.028586992 | 0.097220907 |
| pcaac365.pcaac362             | 0.095570097  | 0.057235543 | 0.09724857  |
| smc181.c162                   | 0.213921384  | 0.128117693 | 0.097257056 |
| c4.pcaac366                   | -0.043889775 | 0.026287175 | 0.097276622 |
| arginine.pcaac281             | -0.007587258 | 0.00454452  | 0.097293873 |
| c162.lysopcac204              | 0.050159383  | 0.030044238 | 0.097298315 |
| pcaac402.lysopcac280          | -0.029306437 | 0.017555385 | 0.097327547 |
| pcaec425.c12                  | 0.08704868   | 0.052146158 | 0.097337314 |
| pcaec381.lysopcac182          | -0.096673042 | 0.057914117 | 0.097351757 |
| pcaec360.citruline            | 0.01463554   | 0.008769407 | 0.097414669 |
| pcaec403.pcaac281             | -0.006808461 | 0.004081164 | 0.097547179 |
| pcaac240.c162                 | -0.143425914 | 0.085977362 | 0.097563559 |
| pcaac402.lysopcac204          | 0.180819524  | 0.108404739 | 0.097599049 |
| creatinine.ornithine          | -0.06543317  | 0.039228433 | 0.097599092 |
| pcaec422.c181                 | -0.017228412 | 0.010330006 | 0.097639085 |
| pcaec321.alphaaminoadipicacid | 0.060113005  | 0.036044553 | 0.097651209 |
| c3.pcaac320                   | -0.19446944  | 0.116612676 | 0.09766893  |
| pcaac381.pcaac366             | -0.082798106 | 0.04965177  | 0.097684164 |
| pcaec385.spermidine           | -0.1140066   | 0.068372068 | 0.097710452 |
| smc261.tyrosine               | -0.112025244 | 0.067190288 | 0.097742469 |
| c3.pcaec300                   | 0.008778997  | 0.005265514 | 0.097746542 |
| pcaac385.citruline            | 0.004639484  | 0.002782929 | 0.097774507 |

|                                |              |             |             |
|--------------------------------|--------------|-------------|-------------|
| glycine.asparticacid           | 0.059818432  | 0.035890467 | 0.097859854 |
| pcaec322.citruline             | 0.009513483  | 0.005708354 | 0.097880695 |
| methioninesulfoxide.citruline  | 0.022793991  | 0.013678865 | 0.097925358 |
| h1.pcaec300                    | -0.029568615 | 0.017746951 | 0.097973644 |
| pcaac360.pcaec300              | -0.09320303  | 0.055944948 | 0.098002785 |
| pcaec381.ornithine             | -0.094271979 | 0.056587243 | 0.09800667  |
| pcaec403.ornithine             | -0.064025893 | 0.038437741 | 0.098057438 |
| lysopcac161.pcaac362           | 0.010190661  | 0.006119221 | 0.098127605 |
| pcaac383.pcaec443              | -0.044137661 | 0.026504857 | 0.09814471  |
| lysopcac160.pcaac405           | 0.152808358  | 0.091767362 | 0.098163861 |
| pcaac405.pcaec322              | 0.12135525   | 0.072890481 | 0.098218356 |
| pcaec361.transhydroxyproline   | 0.08751773   | 0.052576983 | 0.09828534  |
| citruline.pcaec364             | 0.060020494  | 0.036067288 | 0.098372997 |
| pcaec421.c18                   | 0.096941272  | 0.058259266 | 0.098405509 |
| pcaac344.pcaac366              | -0.026295845 | 0.015806894 | 0.098484649 |
| pcaec365.c12                   | 0.088628184  | 0.053278115 | 0.098498135 |
| c182.pcaec423                  | 0.045335582  | 0.027255519 | 0.098527512 |
| pcaac341.pcaec443              | -0.032662751 | 0.019638488 | 0.098558243 |
| pcaac405.pcaec340              | 0.150528477  | 0.090521708 | 0.098618744 |
| c8.pcaec300                    | -0.03035108  | 0.018253359 | 0.098645306 |
| alanine.pcaac362               | 0.011743108  | 0.007062502 | 0.09865059  |
| lysopcac280.smc240             | -0.097626387 | 0.058714158 | 0.098650659 |
| pcaac320.pcaac402              | -0.111957921 | 0.0673422   | 0.098694338 |
| smc181.citruline               | 0.005449655  | 0.003278524 | 0.098753397 |
| lysopcac170.pcaec300           | -0.02093497  | 0.012594727 | 0.098758856 |
| pcaac383.pcaec445              | 0.097116517  | 0.058435274 | 0.098809256 |
| pcaec382.pcaec340              | -0.098778356 | 0.059439742 | 0.098834732 |
| pcaac405.pcaec363              | -0.056174906 | 0.03380721  | 0.098874612 |
| pcaac323.pcaac320              | -0.166143246 | 0.099995382 | 0.098897896 |
| pcaec425.pcaac362              | 0.013666727  | 0.008225564 | 0.098900893 |
| pcaac364.pcaec362              | -0.029091327 | 0.017513498 | 0.098984146 |
| pcaac323.citruline             | 0.004204512  | 0.002531203 | 0.098985693 |
| pcaac320.pcaac361              | -0.124619421 | 0.075023938 | 0.098987816 |
| asymmetricdimethylarginine.pca | 0.006592409  | 0.003970005 | 0.09909002  |
| pcaac300.pcaac366              | 0.03136093   | 0.01888657  | 0.099103309 |
| pcaac405.pcaac422              | -0.039257723 | 0.023642551 | 0.09910721  |
| pcaac380.citruline             | 0.006510708  | 0.003921848 | 0.099179075 |
| smc260.pcaec404                | 0.045359448  | 0.027330892 | 0.099274231 |
| smohc161.c182                  | 0.042472563  | 0.025600484 | 0.099392698 |
| alanine.citruline              | 0.008384744  | 0.005054043 | 0.099399958 |
| pcaec443.pcaec401              | 0.163718513  | 0.09869393  | 0.09943353  |
| pcaac364.pcaac323              | 0.18415703   | 0.111053392 | 0.099549935 |
| pcaac344.smc240                | -0.069918183 | 0.042166441 | 0.099575632 |



|                                |              |             |             |
|--------------------------------|--------------|-------------|-------------|
| arginine.leucine               | -0.056681687 | 0.034185584 | 0.099593709 |
| lysopcac203.pcaec404           | 0.020988662  | 0.012663085 | 0.099713052 |
| pcaec401.pcaac362              | -0.035677595 | 0.021528123 | 0.099756159 |
| asparticacid.pcaac322          | 0.046852907  | 0.028274651 | 0.099794884 |
| smohc222.pcaac361              | 0.091563824  | 0.055267328 | 0.099859678 |
| pcaec322.pcaec385              | -0.091662666 | 0.055327859 | 0.099864961 |
| pcaec385.transhydroxyproline   | 0.088417101  | 0.053382507 | 0.099951028 |
| smc261.c12                     | 0.079333029  | 0.047900021 | 0.0999657   |
| pcaac401.pcaec443              | -0.101401479 | 0.061227854 | 0.099983556 |
| pcaac323.pcaec404              | -0.007364807 | 0.004448208 | 0.100075591 |
| pcaac406.c181                  | -0.016193405 | 0.009782732 | 0.100151656 |
| asymmetricdimethylarginine.pca | -0.019197071 | 0.011598035 | 0.10017291  |
| smohc221.pcaac366              | 0.14211282   | 0.085864745 | 0.100197834 |
| pcaac404.c51dc                 | -0.162555417 | 0.098242719 | 0.100288681 |
| pcaec425.lysopcac180           | -0.070297769 | 0.042487747 | 0.100306676 |
| lysopcac140.pcaec445           | -0.125061482 | 0.075588238 | 0.100313259 |
| pcaec343.pcaac405              | -0.056154849 | 0.033950165 | 0.100409335 |
| pcaec405.lysopcac203           | 0.047242542  | 0.028565625 | 0.100452631 |
| pcaac341.c182                  | -0.047132802 | 0.028502381 | 0.100489388 |
| pcaac362.pcaec300              | 0.010156969  | 0.006143618 | 0.100568665 |
| c181.prolinr                   | 0.052596076  | 0.031813696 | 0.100569208 |
| c51.glutamicacid               | -0.126313617 | 0.076425376 | 0.100667465 |
| pcaac384.pcaec443              | -0.070816495 | 0.042849639 | 0.100687125 |
| pcaec406.asymmetricdimethylar  | 0.032571241  | 0.019708562 | 0.100693242 |
| asparticacid.pcaac240          | -0.047323474 | 0.028641469 | 0.100769366 |
| c181.smc160                    | -0.120075177 | 0.072674285 | 0.100776252 |
| smc240.pcaac365                | 0.128563624  | 0.077820574 | 0.100814145 |
| c51dc.smohc221                 | 0.042053606  | 0.0254567   | 0.10083165  |
| lysopcac181.pcaec362           | 0.057475264  | 0.034798769 | 0.100896953 |
| smohc141.c101                  | -0.021814676 | 0.013208317 | 0.100909228 |
| smc180.c182                    | 0.040184818  | 0.024341047 | 0.101048027 |
| c51.pcaac426                   | 0.062532685  | 0.037879156 | 0.101060438 |
| pcaac360.smc240                | -0.125296658 | 0.07591003  | 0.101112135 |
| lysopcac140.pcaac402           | -0.073865832 | 0.044765079 | 0.101218026 |
| pcaec423.smc240                | -0.088498502 | 0.053639985 | 0.101262364 |
| alphaaminoadipicacid.kynurenin | -0.009635368 | 0.005842046 | 0.101374462 |
| pcaac362.citruline             | 0.007875351  | 0.004775615 | 0.101423285 |
| pcaec301.kynurenine            | 0.024695279  | 0.014975443 | 0.101428261 |
| alphaaminoadipicacid.citruline | 0.004350403  | 0.002638298 | 0.101450497 |
| lysopcac281.pcaac281           | 0.005856991  | 0.003552024 | 0.101456037 |
| smc181.pcaac366                | 0.124377685  | 0.075433742 | 0.101473019 |
| smohc221.c142                  | 0.081245916  | 0.049276919 | 0.10148769  |
| pcaec380.pcaac366              | 0.152694558  | 0.092612762 | 0.101491796 |

|                               |              |             |             |
|-------------------------------|--------------|-------------|-------------|
| pcaac403.smc240               | -0.114706758 | 0.06957837  | 0.101521394 |
| pcaec404.pcaac281             | -0.006008832 | 0.003645684 | 0.101602244 |
| pcaec385.smohc221             | 0.031514226  | 0.019122659 | 0.101643341 |
| pcaec382.arginine             | -0.235579671 | 0.142949586 | 0.101646028 |
| lysopcac181.smc181            | -0.030867932 | 0.018732196 | 0.101674157 |
| pcaac421.serotonin            | -0.212522839 | 0.12897358  | 0.101685073 |
| pcaec363.pcaac406             | -0.117258029 | 0.071163278 | 0.101699279 |
| pcaec445.pcaac385             | 0.117518927  | 0.071329786 | 0.101738097 |
| c16.pcaac281                  | -0.004819776 | 0.002925731 | 0.101772849 |
| smc202.smc160                 | -0.137013481 | 0.083179236 | 0.101807184 |
| pcaec341.alphaaminoadipicacid | 0.007738022  | 0.004699466 | 0.101937517 |
| pcaec404.pcaec405             | -0.515717709 | 0.313221841 | 0.101954277 |
| c181.c12                      | 0.132475343  | 0.080488706 | 0.102079225 |
| c182.lysopcac280              | -0.029150545 | 0.017712234 | 0.102100146 |
| c14.pcaac361                  | -0.079699704 | 0.048431829 | 0.102137281 |
| kynurenine.smohc221           | 0.028379039  | 0.017246502 | 0.102160111 |
| pcaac386.citruline            | 0.00665553   | 0.004045628 | 0.102238278 |
| glutamicacid.citruline        | 0.027134631  | 0.016494973 | 0.102257356 |
| pcaec383.pcaac281             | -0.005565816 | 0.003383791 | 0.102294149 |
| pcaec360.pcaac362             | 0.010849893  | 0.006596379 | 0.102298373 |
| pcaac403.pcaec405             | -0.249765028 | 0.151855638 | 0.102313384 |
| pcaec424.pcaac366             | 0.017568495  | 0.010682128 | 0.102332112 |
| serine.smc202                 | 0.073490357  | 0.044695013 | 0.102414686 |
| serine.pcaec340               | -0.110987865 | 0.067500328 | 0.102415995 |
| pcaec446.spermidine           | -0.112652513 | 0.068517721 | 0.102440773 |
| serine.pcaec363               | 0.043954516  | 0.026738769 | 0.102500192 |
| pcaec341.asymmetricdimethylar | 0.057629372  | 0.035062366 | 0.102546748 |
| methionine.pcaec300           | -0.012260784 | 0.007460158 | 0.102572185 |
| pcaac422.pcaac281             | 0.006074357  | 0.003696218 | 0.102593711 |
| kynurenine.pcaec300           | 0.006856257  | 0.004172133 | 0.102604499 |
| pcaac344.citruline            | 0.00622794   | 0.003789932 | 0.102617026 |
| c12.c8                        | 0.101056233  | 0.061502965 | 0.102653029 |
| citruline.asparticacid        | 0.061219513  | 0.037259359 | 0.102662874 |
| pcaec425.pcaac366             | 0.022954482  | 0.013973213 | 0.102728159 |
| c12.pcaec421                  | 0.005210934  | 0.003172129 | 0.102733187 |
| putrescine.pcaec385           | 0.132969343  | 0.080967109 | 0.102828809 |
| serotonin.c51                 | 0.189898192  | 0.115652259 | 0.102888585 |
| pcaac362.putrescine           | -0.042096225 | 0.025638246 | 0.102897907 |
| pcaac405.putrescine           | -0.089094704 | 0.054262394 | 0.10289939  |
| lysopcac161.lysopcac181       | 0.199998552  | 0.121823198 | 0.102943414 |
| c51.pcaec361                  | -0.015027734 | 0.009156899 | 0.103062575 |
| lysopcac181.pcaac281          | 0.003788201  | 0.002308406 | 0.103081666 |
| pcaec446.pcaac362             | 0.06994509   | 0.042623285 | 0.103089893 |

|                                 |              |             |             |
|---------------------------------|--------------|-------------|-------------|
| asymmetricdimethylarginine.glut | -0.019073344 | 0.011627342 | 0.1032187   |
| smc261.lysopcac203              | -0.022508054 | 0.013722506 | 0.103251615 |
| pcaec382.pcaac281               | -0.007354073 | 0.004483816 | 0.10327076  |
| pcaac365.citruline              | 0.008521297  | 0.00519552  | 0.103273499 |
| glycine.pcaac300                | -0.076526647 | 0.046659652 | 0.103277822 |
| smc160.tyrosine                 | -0.107377752 | 0.065480364 | 0.103331266 |
| c16.pcaac366                    | 0.027978578  | 0.017062889 | 0.103354974 |
| pcaec423.c14                    | -0.115838832 | 0.070646528 | 0.103362625 |
| pcaec381.pcaac281               | -0.007834952 | 0.004778604 | 0.103384644 |
| phenylalanine.pcaac341          | 0.009254998  | 0.005644852 | 0.103393767 |
| smc241.c182                     | 0.039578155  | 0.024141268 | 0.10341603  |
| pcaac386.pcaac405               | -0.070589126 | 0.043062089 | 0.10345754  |
| ornithine.pcaec362              | -0.014013202 | 0.008550319 | 0.103526524 |
| alanine.transhydroxyproline     | -0.038123922 | 0.023268256 | 0.103622049 |
| pcaac421.pcaac381               | 0.101280964  | 0.06181795  | 0.103638206 |
| acetylmithoine.lysopcac203      | -0.042735442 | 0.026087943 | 0.103689306 |
| pcaec362.pcaec443               | -0.089528304 | 0.054663173 | 0.103754578 |
| pcaec402.pcaac366               | 0.030865978  | 0.018846573 | 0.103768651 |
| pcaec301.pcaac344               | -0.153390218 | 0.093660385 | 0.103773327 |
| asparticacid.pcaec424           | -0.038910184 | 0.02376053  | 0.103800578 |
| c51dc.citruline                 | -0.006051912 | 0.00369608  | 0.103844634 |
| pcaac402.pcaec402               | -0.316771327 | 0.193463832 | 0.103848726 |
| smohc141.alphaaminoadipicacid   | -0.023097844 | 0.014108721 | 0.10389784  |
| pcaec342.c181                   | -0.020108345 | 0.012290708 | 0.104122204 |
| pcaac422.c182                   | -0.081987348 | 0.05011322  | 0.10412608  |
| pcaec340.pcaac322               | -0.132960495 | 0.081275579 | 0.104151325 |
| pcaac362.asymmetricdimethylar;  | 0.031934707  | 0.019521718 | 0.104165266 |
| pcaec360.smohc221               | -0.082788699 | 0.050609691 | 0.104171209 |
| ornithine.citruline             | 0.004850965  | 0.002965593 | 0.104187699 |
| c4.pcaac281                     | 0.01060574   | 0.006483728 | 0.104187939 |
| pcaac361.pcaac343               | 0.174316429  | 0.106574545 | 0.104212701 |
| smc260.pcaac363                 | -0.024423589 | 0.014932857 | 0.104227131 |
| pcaec322.smohc221               | 0.021343954  | 0.013052522 | 0.104295152 |
| pcaec421.pcaac405               | -0.238841712 | 0.146065167 | 0.104308538 |
| c51dc.smohc241                  | 0.101692986  | 0.0621965   | 0.104338932 |
| pcaac424.smc240                 | -0.08188751  | 0.050085695 | 0.104355602 |
| pcaac380.glutamicacid           | 0.078604336  | 0.048078244 | 0.104360389 |
| pcaac344.leucine                | -0.013366867 | 0.008175992 | 0.104367309 |
| phenylalanine.citruline         | 0.00359082   | 0.002196487 | 0.104386424 |
| pcaec362.c141oh                 | -0.164430485 | 0.100601365 | 0.10445481  |
| c142.smohc241                   | -0.113218097 | 0.06927592  | 0.104490326 |
| lysopcac204.pcaec422            | 0.072930017  | 0.044634636 | 0.104568824 |
| c2.pcaac422                     | 0.139489026  | 0.085385149 | 0.104629444 |

|                               |              |             |             |
|-------------------------------|--------------|-------------|-------------|
| smc260.c12                    | 0.085742865  | 0.052488582 | 0.10464887  |
| creatinine.asparticacid       | 0.08774499   | 0.053715488 | 0.104657064 |
| ornithine.phenylalanine       | 0.098758574  | 0.060464426 | 0.104694997 |
| smc160.pcaac405               | -0.057180292 | 0.035014947 | 0.10475991  |
| methionine.lysopcac204        | -0.043243366 | 0.026484376 | 0.10480992  |
| pcaac426.pcaac281             | 0.00619245   | 0.003793112 | 0.10485979  |
| pcaec404.pcaac422             | -0.173462606 | 0.106277701 | 0.104941466 |
| pcaec342.alphaaminoadipicacid | 0.023704677  | 0.01452581  | 0.10499697  |
| lysopcac281.pcaac362          | -0.045680464 | 0.027993016 | 0.105007175 |
| pcaec365.c14                  | -0.07036272  | 0.043120519 | 0.105024759 |
| smohc141.asymmetricdimethyla  | 0.042193534  | 0.025862624 | 0.105092423 |
| pcaec340.citruline            | 0.009378386  | 0.005748872 | 0.105114506 |
| smc260.pcaac281               | 0.005390935  | 0.003305719 | 0.105231426 |
| histidine.pcaec423            | -0.057774684 | 0.035436369 | 0.105318543 |
| pcaac361.c181                 | -0.010023959 | 0.006148684 | 0.105343322 |
| c141oh.pcaac405               | -0.10507382  | 0.064471823 | 0.105448627 |
| pcaec301.lysopcac182          | -0.031118312 | 0.019094255 | 0.105457572 |
| pcaac384.lysopcac280          | 0.008726525  | 0.005354654 | 0.105460273 |
| pcaac362.smc160               | -0.205558924 | 0.126141901 | 0.105486454 |
| c141oh.pcaac322               | -0.105093196 | 0.064498903 | 0.105529915 |
| pcaac422.lysopcac182          | -0.148096792 | 0.090895272 | 0.105544153 |
| lysopcac280.pcaec404          | 0.025342479  | 0.015555214 | 0.105568988 |
| pcaec446.pcaec364             | 0.050048943  | 0.030724227 | 0.105616022 |
| pcaec404.lysopcac203          | 0.029416397  | 0.018061464 | 0.105677574 |
| pcaac402.pcaac366             | 0.043930542  | 0.026974836 | 0.105700476 |
| pcaec340.pcaac405             | 0.099883658  | 0.061335966 | 0.105723162 |
| pcaac405.pcaec420             | -0.089209921 | 0.054801474 | 0.105849138 |
| pcaec300.c141oh               | -0.187422687 | 0.115134628 | 0.10585289  |
| pcaac360.pcaac361             | 0.094495364  | 0.058053454 | 0.105879762 |
| citruline.pcaac320            | -0.110537076 | 0.067909416 | 0.105883314 |
| pcaac362.smc240               | -0.111457544 | 0.068475559 | 0.10588657  |
| pcaac320.c16                  | 0.07310547   | 0.044913465 | 0.105887027 |
| serine.c8                     | 0.092869896  | 0.057056376 | 0.105889047 |
| pcaec300.asparticacid         | -0.053330679 | 0.032769081 | 0.105935163 |
| lysine.pcaac281               | -0.00475986  | 0.00292526  | 0.106001365 |
| c18.citruline                 | -0.003542492 | 0.002177247 | 0.106024173 |
| c16.c101                      | -0.016153243 | 0.009928403 | 0.106040733 |
| putrescine.pcaac365           | 0.053808875  | 0.033082893 | 0.106144222 |
| pcaac320.lysopcac161          | 0.180512777  | 0.110988809 | 0.106161498 |
| pcaec363.c101                 | -0.014707672 | 0.009044919 | 0.106232845 |
| pcaec301.c12                  | 0.089964418  | 0.055328247 | 0.106245125 |
| c51dc.pcaac366                | 0.041189092  | 0.025334335 | 0.106285915 |
| c101.pcaec443                 | -0.115434196 | 0.071011915 | 0.106341321 |

|                                |              |             |             |
|--------------------------------|--------------|-------------|-------------|
| c14.c101                       | -0.022315522 | 0.013728216 | 0.106349547 |
| pcaac362.c182                  | -0.092553194 | 0.056943185 | 0.106384089 |
| c182.pcaec300                  | 0.006929313  | 0.00426333  | 0.106390792 |
| isoleucine.pcaec403            | -0.115650955 | 0.071158422 | 0.106405429 |
| smohc141.smc160                | 0.271926772  | 0.167315587 | 0.106411291 |
| glycine.pcaec380               | -0.098706758 | 0.060736455 | 0.10642575  |
| pcaac363.lysopcac280           | 0.015097321  | 0.009289962 | 0.106434928 |
| smc260.lysopcac180             | 0.100445202  | 0.061809704 | 0.106445638 |
| pcaec444.pcaac366              | 0.01395806   | 0.008589434 | 0.106455227 |
| pcaec365.pcaac380              | 0.170042351  | 0.104642469 | 0.106464323 |
| pcaac425.pcaac366              | 0.05724669   | 0.035229317 | 0.10646669  |
| smohc161.tyrosine              | -0.132644831 | 0.081632654 | 0.10648245  |
| smc261.smohc141                | -0.134687474 | 0.082896575 | 0.106511024 |
| asparagine.glutamine           | 0.059646128  | 0.036711572 | 0.106520081 |
| lysopcac170.alphaaminoadipicac | -0.004520217 | 0.002782235 | 0.106531024 |
| pcaec403.pcaac366              | 0.026589392  | 0.016366062 | 0.106532095 |
| pcaac320.c181                  | -0.007942745 | 0.004889603 | 0.106585813 |
| smohc161.c12                   | 0.124176629  | 0.076464026 | 0.106677091 |
| histidine.citruline            | 0.008650158  | 0.005327343 | 0.106732487 |
| creatinine.pcaec405            | -0.090503089 | 0.055746652 | 0.106787457 |
| pcaec406.pcaac362              | -0.027857048 | 0.017166561 | 0.106941648 |
| pcaec364.pcaec361              | -0.025658147 | 0.015812092 | 0.106954314 |
| pcaec381.pcaec365              | 0.041124739  | 0.02534495  | 0.106973713 |
| c2.pcaec443                    | -0.140434676 | 0.086585338 | 0.107119165 |
| pcaac365.transhydroxyproline   | 0.062753544  | 0.03869114  | 0.107121778 |
| c51dc.glutamine                | 0.035438403  | 0.021849886 | 0.107123193 |
| pcaec420.lysopcac160           | 0.046548046  | 0.028705071 | 0.107188974 |
| pcaac421.pcaec362              | 0.028202241  | 0.017394152 | 0.107239006 |
| lysopcac204.c18                | -0.056328476 | 0.03474706  | 0.107295429 |
| pcaec322.pcaec361              | -0.012447614 | 0.007679256 | 0.107329856 |
| lysopcac280.pcaec365           | 0.04180154   | 0.025788979 | 0.107336947 |
| pcaec386.asparticacid          | -0.0737489   | 0.045500427 | 0.107351419 |
| pcaec363.pcaec361              | -0.016811033 | 0.010372384 | 0.10737085  |
| c181.pcaec381                  | 0.107386328  | 0.066268842 | 0.107431955 |
| phenylalanine.pcaac426         | 0.093775149  | 0.057869926 | 0.107435786 |
| pcaac406.citruline             | 0.004486866  | 0.002769878 | 0.107558031 |
| pcaec420.c8                    | -0.095561409 | 0.05899327  | 0.107559906 |
| c18.pcaec401                   | -0.065909641 | 0.040688777 | 0.107564535 |
| pcaac421.lysopcac182           | -0.156299037 | 0.096501119 | 0.107604938 |
| pcaec382.c181                  | -0.047006867 | 0.029037075 | 0.107777939 |
| pcaac362.lysopcac280           | 0.011532592  | 0.007124863 | 0.107824557 |
| pcaac320.citruline             | 0.011097398  | 0.006856031 | 0.107826168 |
| pcaec405.pcaac362              | 0.028576409  | 0.017655761 | 0.107847997 |

|                               |              |             |             |
|-------------------------------|--------------|-------------|-------------|
| pcaec361.pcaec340             | -0.123263211 | 0.076165244 | 0.107883814 |
| lysopcac161.pcaec340          | 0.061368316  | 0.037923022 | 0.107912238 |
| isoleucine.pcaec423           | 0.029581724  | 0.018281995 | 0.107945477 |
| pcaac383.smohc161             | -0.039643848 | 0.024501325 | 0.10795647  |
| pcaec321.serotonin            | -0.1673293   | 0.103419261 | 0.107969057 |
| pcaac363.smc202               | 0.060492734  | 0.037388165 | 0.107970262 |
| pcaec360.transhydroxyproline  | 0.084680899  | 0.052340709 | 0.107988917 |
| pcaac420.pcaec362             | 0.025065369  | 0.01549482  | 0.108035766 |
| c10.lysopcac170               | -0.0477608   | 0.029526191 | 0.108054592 |
| pcaac421.pcaec300             | 0.019591375  | 0.012111621 | 0.108055805 |
| pcaec380.smohc241             | 0.128608284  | 0.079509483 | 0.108065973 |
| pcaec364.alphaaminoadipicacid | 0.006613916  | 0.004089108 | 0.108081974 |
| pcaac404.pcaec443             | -0.049549586 | 0.030638034 | 0.108122968 |
| putrescine.citruline          | -0.00690968  | 0.004272532 | 0.108128204 |
| smc181.pcaac360               | 0.091508903  | 0.056612021 | 0.108303578 |
| pcaec321.citruline            | 0.008641957  | 0.005348686 | 0.108456299 |
| lysopcac203.citruline         | -0.007632345 | 0.004724229 | 0.108486869 |
| lysopcac160.citruline         | -0.016926474 | 0.010477333 | 0.108496017 |
| h1.prolinr                    | -0.072789866 | 0.04506376  | 0.108554231 |
| pcaec420.c51                  | 0.193526056  | 0.119812418 | 0.10855897  |
| pcaac341.lysopcac161          | 0.1594938    | 0.098759578 | 0.108617837 |
| pcaec445.pcaec384             | 0.109779038  | 0.067976891 | 0.108623042 |
| lysopcac181.pcaec405          | -0.061276174 | 0.03794731  | 0.108661314 |
| h1.pcaec340                   | -0.142803078 | 0.088437985 | 0.108670925 |
| pcaac343.c2                   | -0.151147571 | 0.093608169 | 0.108680045 |
| smc160.putrescine             | -0.056516625 | 0.035004961 | 0.108712947 |
| smc240.pcaac344               | -0.086107699 | 0.053333591 | 0.108717355 |
| pcaac420.smohc221             | 0.080908021  | 0.050119102 | 0.108759988 |
| pcaec343.pcaec443             | -0.058513758 | 0.036250027 | 0.108791166 |
| pcaec423.pcaec361             | 0.112013811  | 0.06940289  | 0.108836054 |
| pcaec406.c16                  | 0.098472779  | 0.061014652 | 0.108845703 |
| smohc141.c162                 | 0.159863252  | 0.099054499 | 0.108851853 |
| asparagine.lysopcac204        | -0.013897078 | 0.008611551 | 0.108877918 |
| pcaac403.ornithine            | -0.087541088 | 0.054256449 | 0.10894376  |
| pcaac381.lysopcac182          | -0.031803995 | 0.019715298 | 0.109010158 |
| asparagine.pcaec405           | -0.081641258 | 0.050615939 | 0.109055348 |
| pcaac405.prolinr              | 0.043627897  | 0.027049128 | 0.109064538 |
| c181.pcaec361                 | -0.023866275 | 0.014797122 | 0.109067454 |
| pcaac366.glycine              | 0.095303981  | 0.059095868 | 0.109110652 |
| smc261.pcaac281               | 0.002665252  | 0.001653243 | 0.109233725 |
| pcaec365.prolinr              | 0.044851019  | 0.02782103  | 0.109235773 |
| methioninesulfoxide.pcaec300  | -0.0227507   | 0.01411364  | 0.109270849 |
| asparticacid.lysopcac180      | -0.135529197 | 0.084081432 | 0.109289403 |

|                               |              |             |             |
|-------------------------------|--------------|-------------|-------------|
| pcaac404.alphaaminoadipicacid | 0.005757191  | 0.00357231  | 0.109347051 |
| lysopcac281.pcaac365          | -0.114470134 | 0.071029144 | 0.109351802 |
| lysopcac280.prolinr           | -0.048235472 | 0.029930393 | 0.109353011 |
| pcaac321.pcaac426             | 0.151812282  | 0.094212574 | 0.109398365 |
| pcaac321.pcaec300             | -0.031239831 | 0.019388543 | 0.109426297 |
| pcaac380.lysopcac182          | -0.022273462 | 0.013823896 | 0.109431349 |
| c10.c181                      | -0.054117627 | 0.033588834 | 0.109442231 |
| isoleucine.c18                | 0.072588603  | 0.045055875 | 0.109463925 |
| lysopcac204.lysopcac161       | -0.133266792 | 0.082738337 | 0.10954636  |
| pcaec301.smohc222             | -0.009361459 | 0.005813372 | 0.109627102 |
| c181.pcaec300                 | 0.012766763  | 0.007928729 | 0.109658045 |
| pcaec424.lysopcac280          | -0.012321991 | 0.007653754 | 0.109715418 |
| pcaec384.pcaec360             | -0.0110374   | 0.006856393 | 0.109744025 |
| smc240.pcaec300               | -0.016421774 | 0.010202484 | 0.109790166 |
| smohc241.glutamine            | -0.021397591 | 0.013296832 | 0.109869136 |
| c162.pcaec300                 | -0.05048577  | 0.031372966 | 0.109871813 |
| pcaac385.isoleucine           | 0.057303958  | 0.035614318 | 0.109915115 |
| lysopcac181.serotonin         | -0.186018957 | 0.115627563 | 0.109967145 |
| lysopcac180.pcaac323          | -0.125541956 | 0.078043932 | 0.11000452  |
| alphaaminoadipicacid.pcaec300 | 0.011336912  | 0.007049128 | 0.110077859 |
| putrescine.ornithine          | 0.078759174  | 0.048975796 | 0.110110074 |
| c0.pcaac365                   | -0.100816522 | 0.062700721 | 0.110159158 |
| pcaac425.leucine              | -0.0378326   | 0.023529443 | 0.110162918 |
| citruline.pcaac281            | -0.005046348 | 0.003138533 | 0.110166216 |
| pcaec381.c182                 | -0.089206674 | 0.055486648 | 0.110200004 |
| pcaac383.c51dc                | -0.191292936 | 0.118993407 | 0.11022665  |
| pcaac344.lysopcac280          | 0.011607452  | 0.007220427 | 0.1102283   |
| pcaac362.asparticacid         | 0.026605475  | 0.016556371 | 0.110364859 |
| pcaac406.lysopcac170          | 0.013411224  | 0.008346075 | 0.110380909 |
| lysine.citruline              | 0.004117139  | 0.002562269 | 0.110393343 |
| pcaec301.leucine              | -0.024530385 | 0.015267229 | 0.110415023 |
| c8.pcaac320                   | -0.078650099 | 0.048955821 | 0.110454999 |
| pcaac300.lysopcac203          | 0.026291697  | 0.01636718  | 0.110495786 |
| c5.pcaec362                   | -0.028549432 | 0.017772943 | 0.110501191 |
| pcaac365.alphaaminoadipicacid | 0.006202025  | 0.003861423 | 0.110543509 |
| smc260.tyrosine               | -0.184066569 | 0.114604548 | 0.110554075 |
| lysopcac280.pcaac281          | -0.004712732 | 0.002934605 | 0.110594713 |
| pcaec362.alphaaminoadipicacid | -0.012875953 | 0.008017829 | 0.1105951   |
| smohc241.c141                 | 0.069595733  | 0.043337524 | 0.110598431 |
| pcaac401.lysopcac161          | 0.141652131  | 0.088210024 | 0.110609284 |
| pcaac320.pcaec445             | 0.090809309  | 0.056555735 | 0.110651134 |
| pcaec341.pcaec421             | 0.003212139  | 0.002000551 | 0.110658466 |
| pcaac323.smohc221             | 0.012867084  | 0.008013783 | 0.110660213 |

|                                |              |             |             |
|--------------------------------|--------------|-------------|-------------|
| methionine.pcaec402            | -0.088185317 | 0.054939075 | 0.110764058 |
| pcaac323.pcaec361              | -0.008616273 | 0.005369126 | 0.110844701 |
| pcaec402.lysopcac203           | 0.041166475  | 0.025653601 | 0.110861413 |
| lysopcac182.citruline          | -0.006484848 | 0.004041676 | 0.110907872 |
| putrescine.lysopcac280         | 0.016399218  | 0.01022401  | 0.111018993 |
| pcaac300.c142                  | 0.043256859  | 0.026970335 | 0.111046063 |
| pcaec342.lysopcac204           | -0.0494369   | 0.030833601 | 0.11116153  |
| c12.lysopcac181                | -0.142268267 | 0.088745533 | 0.111214888 |
| pcaac405.citruline             | 0.005935834  | 0.00370283  | 0.111225975 |
| pcaac404.smohc161              | -0.025654561 | 0.01600425  | 0.111241205 |
| asparagine.pcaec423            | -0.019245466 | 0.012006521 | 0.111255909 |
| pcaec406.c51                   | 0.095075804  | 0.059317471 | 0.111275368 |
| c102.pcaac344                  | -0.078570883 | 0.049032652 | 0.11136603  |
| lysopcac181.pcaac381           | -0.080833624 | 0.050446363 | 0.111377509 |
| c182.pcaac281                  | 0.008855004  | 0.005526918 | 0.111423559 |
| arginine.pcaec443              | 0.11401115   | 0.071186759 | 0.111552273 |
| pcaec381.lysopcac280           | -0.019652197 | 0.012270877 | 0.111562559 |
| lysopcac280.pcaac422           | -0.048134132 | 0.030057019 | 0.111585645 |
| smohc141.valine                | -0.143616321 | 0.089691714 | 0.111631202 |
| phenylalanine.c141             | -0.041625816 | 0.026002177 | 0.111711617 |
| pcaec364.pcaac320              | 0.172835383  | 0.10797162  | 0.11173615  |
| putrescine.pcaec424            | 0.125355263  | 0.0783207   | 0.111782763 |
| pcaec340.c101                  | -0.019454694 | 0.012155175 | 0.111785074 |
| lysopcac160.c51                | -0.137108974 | 0.08566822  | 0.111799009 |
| pcaac405.c51dc                 | -0.202877277 | 0.126768378 | 0.111818356 |
| pcaac404.c142                  | -0.07308109  | 0.045665054 | 0.111819524 |
| lysopcac160.alphaaminoadipicac | -0.005539118 | 0.003461196 | 0.111824951 |
| pcaac404.smc161                | -0.066681686 | 0.041672341 | 0.111870523 |
| pcaac364.pcaac366              | -0.020351099 | 0.01272109  | 0.111948339 |
| smohc141.pcaac362              | -0.009515563 | 0.005948112 | 0.111955065 |
| lysopcac170.pcaec404           | 0.035720657  | 0.022332575 | 0.112016167 |
| pcaec343.c5                    | 0.032384895  | 0.020251602 | 0.112095974 |
| smc240.c2                      | 0.08808586   | 0.055088869 | 0.112129359 |
| pcaac405.pcaac362              | 0.020723861  | 0.012960837 | 0.112133237 |
| pcaec342.pcaac406              | -0.115003866 | 0.071931246 | 0.112168237 |
| arginine.citruline             | 0.026572017  | 0.016620181 | 0.112173214 |
| asymmetricdimethylarginine.c18 | 0.076281794  | 0.047712511 | 0.112173339 |
| lysopcac140.smohc161           | -0.02568324  | 0.01606508  | 0.11219112  |
| pcaec446.c14                   | -0.069451622 | 0.043445222 | 0.112212858 |
| pcaec446.valine                | 0.144239963  | 0.090242523 | 0.112266913 |
| lysopcac182.pcaec405           | -0.068411305 | 0.042804823 | 0.112299027 |
| pcaec341.c181                  | -0.009847383 | 0.006163003 | 0.112386468 |
| leucine.citruline              | 0.00412962   | 0.002585296 | 0.11249199  |



|                                |              |             |             |
|--------------------------------|--------------|-------------|-------------|
| pcaac384.c8                    | -0.078735852 | 0.049300763 | 0.112558299 |
| pcaec424.pcaac281              | -0.00519676  | 0.003254027 | 0.112564356 |
| pcaec446.pcaac361              | -0.018242384 | 0.011423006 | 0.112572813 |
| pcaac321.lysopcac280           | 0.027792999  | 0.017404206 | 0.112589216 |
| c162.c102                      | 0.098091107  | 0.061425767 | 0.112590978 |
| smohc222.pcaac366              | -0.01872549  | 0.01172627  | 0.112595686 |
| pcaac363.smohc221              | 0.03070102   | 0.019225807 | 0.112599854 |
| smc202.c182                    | 0.044509687  | 0.027876792 | 0.112646202 |
| lysopcac181.putrescine         | -0.112873798 | 0.070698517 | 0.112669918 |
| kynurenine.pcaec404            | -0.015153835 | 0.009491888 | 0.112680495 |
| c3.pcaac281                    | -0.009470014 | 0.00593208  | 0.112702131 |
| smc160.valine                  | -0.109353481 | 0.068500333 | 0.112705128 |
| serotonin.kynurenine           | -0.025965356 | 0.016267388 | 0.112757237 |
| alanine.smohc161               | -0.015843684 | 0.009928466 | 0.112841329 |
| c12.pcaec340                   | 0.05756442   | 0.036073196 | 0.112845037 |
| pcaac380.transhydroxyproline   | 0.082768192  | 0.051876128 | 0.112905479 |
| citruline.pcaec423             | 0.035567912  | 0.022295878 | 0.112956519 |
| c141oh.pcaec362                | 0.024542698  | 0.01538561  | 0.112978048 |
| smohc161.c141oh                | -0.150480992 | 0.094338899 | 0.112991804 |
| pcaac360.asymmetricdimethylar; | 0.083401622  | 0.052288603 | 0.113011018 |
| lysopcac182.pcaec404           | 0.028577767  | 0.017923233 | 0.113138855 |
| pcaec420.pcaac405              | -0.067565314 | 0.042380854 | 0.11318642  |
| c51.citruline                  | 0.00326338   | 0.002047624 | 0.113298791 |
| lysopcac182.c51                | -0.108127251 | 0.067846699 | 0.113307887 |
| glycine.pcaec361               | 0.012895467  | 0.008092045 | 0.113330624 |
| pcaec444.citruline             | -0.003696898 | 0.00232003  | 0.113359357 |
| smc260.pcaac401                | 0.066225     | 0.041568764 | 0.113432644 |
| pcaac383.pcaac300              | 0.035876872  | 0.022521583 | 0.113464912 |
| pcaec381.pcaac422              | -0.115403725 | 0.072446368 | 0.113475165 |
| c5.pcaec361                    | -0.044352883 | 0.027846004 | 0.113511586 |
| creatinine.pcaac361            | -0.083159784 | 0.052216792 | 0.113557554 |
| pcaec383.pcaec381              | 0.050440808  | 0.03167439  | 0.113581766 |
| c0.citruline                   | -0.010238047 | 0.006429474 | 0.1136082   |
| c18.c141                       | 0.040633554  | 0.025517822 | 0.113608589 |
| lysopcac203.alphaaminoadipicac | -0.014165774 | 0.008896864 | 0.113639781 |
| pcaac420.pcaac381              | 0.079091734  | 0.049692346 | 0.113773108 |
| pcaac342.alphaaminoadipicacid  | 0.020986693  | 0.01318705  | 0.113810404 |
| pcaec382.pcaec404              | 0.075166551  | 0.047233088 | 0.113825313 |
| pcaac385.pcaec446              | -0.083522787 | 0.052490578 | 0.113870389 |
| c16.pcaac361                   | -0.069717931 | 0.043820044 | 0.113913232 |
| pcaac426.smohc221              | -0.100027209 | 0.062870926 | 0.113916023 |
| lysopcac140.lysopcac280        | 0.010417276  | 0.006549244 | 0.1140029   |
| pcaac361.lysopcac203           | 0.136673727  | 0.085933399 | 0.114035872 |

|                                 |              |             |             |
|---------------------------------|--------------|-------------|-------------|
| lysopcac161.pcaac426            | -0.153639157 | 0.096600773 | 0.114037304 |
| pcaec342.c101                   | -0.01340767  | 0.008430849 | 0.11406975  |
| pcaac360.c142                   | 0.081316268  | 0.051135811 | 0.114094275 |
| glutamine.citruline             | 0.011933842  | 0.007505315 | 0.114128062 |
| c8.smc160                       | -0.108493275 | 0.068232681 | 0.114128876 |
| pcaac401.pcaec401               | 0.174286734  | 0.109611059 | 0.114129229 |
| smc261.asparticacid             | 0.06145903   | 0.038654021 | 0.11414486  |
| c5.pcaec300                     | 0.026860834  | 0.016896498 | 0.114201217 |
| smc161.c182                     | 0.044462962  | 0.027971143 | 0.114229806 |
| pcaac403.pcaec423               | -0.099042921 | 0.062315566 | 0.11428042  |
| lysopcac280.lysopcac182         | -0.022468729 | 0.014138449 | 0.114321878 |
| pcaec301.pcaec443               | 0.091314856  | 0.057459999 | 0.11432262  |
| pcaec341.asparagine             | 0.01304626   | 0.008209673 | 0.114335567 |
| asymmetricdimethylarginine.asp  | 0.043235678  | 0.027207717 | 0.114343814 |
| smc241.histidine                | -0.080140645 | 0.050435758 | 0.114373484 |
| pcaac364.alphaaminoadipicacid   | 0.003339385  | 0.002101613 | 0.114373962 |
| smc161.c141oh                   | -0.14564755  | 0.091666235 | 0.11439042  |
| acetylmithoine.pcaac361         | -0.040442045 | 0.025455951 | 0.114431762 |
| pcaac385.prolinr                | 0.033292909  | 0.020961474 | 0.114525901 |
| serotonin.c162                  | 0.099950366  | 0.062939981 | 0.114585577 |
| pcaac425.pcaec300               | -0.030717636 | 0.019343508 | 0.114589895 |
| c4.pcaac320                     | -0.19842101  | 0.12495862  | 0.114615645 |
| pcaec443.smc240                 | -0.071511939 | 0.045036347 | 0.114620642 |
| glutamicacid.pcaac362           | 0.031232728  | 0.0196768   | 0.114753    |
| pcaac420.pcaec300               | 0.02098936   | 0.013225852 | 0.114819186 |
| pcaac300.pcaec300               | -0.017965405 | 0.011320527 | 0.114823453 |
| lysopcac170.pcaac366            | -0.04912871  | 0.030958722 | 0.114838389 |
| pcaac404.citruline              | 0.012782241  | 0.008056146 | 0.114898586 |
| lysine.asymmetricdimethylargini | 0.028661954  | 0.018065482 | 0.114917981 |
| pcaec365.smc160                 | 0.274471931  | 0.172999694 | 0.114920988 |
| lysopcac170.pcaec365            | 0.049279218  | 0.031065667 | 0.114978547 |
| pcaec420.c181                   | -0.014069595 | 0.008869576 | 0.114982199 |
| citruline.lysopcac204           | 0.078831304  | 0.049716206 | 0.115129726 |
| lysopcac281.phenylalanine       | 0.106635827  | 0.06725763  | 0.115162187 |
| pcaec383.pcaac366               | 0.038335849  | 0.024180393 | 0.115178641 |
| prolinr.lysopcac180             | 0.163205643  | 0.102956449 | 0.115228505 |
| pcaec342.pcaac320               | 0.147785845  | 0.093231778 | 0.115239074 |
| pcaec341.citruline              | 0.007348565  | 0.004636104 | 0.115255291 |
| serotonin.c12                   | 0.082383699  | 0.051990238 | 0.115363026 |
| pcaec386.alphaaminoadipicacid   | 0.007404695  | 0.004673159 | 0.11538197  |
| pcaec322.smc202                 | 0.120933803  | 0.076327924 | 0.115408857 |
| c51.kynurenine                  | -0.007976945 | 0.005035264 | 0.115450253 |
| pcaac405.c141                   | -0.069510815 | 0.043891221 | 0.115566241 |

|                                |              |             |             |
|--------------------------------|--------------|-------------|-------------|
| pcaac344.pcaec404              | -0.042863779 | 0.027067144 | 0.115588414 |
| c102.pcaac361                  | -0.075116036 | 0.0474353   | 0.115602548 |
| glutamine.c18                  | -0.121795116 | 0.076917015 | 0.115622119 |
| pcaac320.asymmetricdimethylar; | 0.088912328  | 0.056162455 | 0.115698195 |
| isoleucine.citruline           | 0.006287018  | 0.003971338 | 0.115704816 |
| isoleucine.lysopcac161         | -0.169508039 | 0.107077015 | 0.115716353 |
| pcaec385.c14                   | -0.06448141  | 0.040733669 | 0.115727197 |
| pcaec420.smc240                | -0.041282088 | 0.026078527 | 0.115729198 |
| pcaac366.pcaec405              | -0.094594612 | 0.059765655 | 0.115782293 |
| c18.valine                     | -0.052044493 | 0.032884843 | 0.115811985 |
| pcaac361.pcaec445              | 0.081030988  | 0.051204589 | 0.115842546 |
| c182.pcaec401                  | -0.084841724 | 0.053616293 | 0.115867113 |
| pcaac406.pcaec405              | -0.101772188 | 0.064324151 | 0.115915066 |
| pcaac383.asymmetricdimethylar; | 0.051238754  | 0.032391707 | 0.115990211 |
| smc241.tyrosine                | -0.103380782 | 0.065358235 | 0.116011197 |
| pcaac421.c51                   | 0.183965354  | 0.11630467  | 0.116011709 |
| pcaec406.pcaec342              | 0.249799758  | 0.157929479 | 0.116020092 |
| smohc221.pcaec362              | 0.072462004  | 0.045813972 | 0.116033755 |
| pcaec424.citruline             | -0.004243625 | 0.002683046 | 0.116036695 |
| c8.lysopcac180                 | -0.118028574 | 0.074667136 | 0.116245825 |
| pcaac343.citruline             | 0.015753889  | 0.009966567 | 0.11625872  |
| lysopcac203.pcaac322           | 0.149078877  | 0.094340265 | 0.116361334 |
| lysopcac161.lysopcac180        | -0.092188496 | 0.058340077 | 0.116369075 |
| pcaac385.c8                    | -0.070729686 | 0.044767673 | 0.116429519 |
| smc202.pcaac281                | 0.002493686  | 0.001578431 | 0.116447079 |
| h1.pcaac281                    | 0.004434758  | 0.002807727 | 0.116531376 |
| smohc221.pcaec340              | -0.054596949 | 0.034572785 | 0.116598949 |
| pcaec405.c5                    | -0.056969025 | 0.036075597 | 0.11660624  |
| c14.citruline                  | 0.015117238  | 0.009574776 | 0.116674179 |
| smc261.pcaec362                | 0.034471455  | 0.021833847 | 0.11668626  |
| glutamine.smohc221             | 0.115498571  | 0.073167392 | 0.116744935 |
| isoleucine.creatinine          | -0.020360412 | 0.012900834 | 0.11682027  |
| pcaac322.asymmetricdimethylar; | 0.030709775  | 0.019458811 | 0.116827325 |
| pcaac343.leucine               | -0.014348668 | 0.009092157 | 0.116840408 |
| pcaec401.citruline             | 0.093364167  | 0.059164284 | 0.116860488 |
| pcaac405.smohc161              | -0.020433229 | 0.012948752 | 0.116870113 |
| pcaac361.c182                  | -0.045980705 | 0.029145311 | 0.116955428 |
| pcaac405.pcaac323              | -0.200307477 | 0.126987374 | 0.117014171 |
| c182.arginine                  | 0.088686409  | 0.056240666 | 0.117122812 |
| lysopcac204.pcaec340           | 0.125665637  | 0.0797157   | 0.117234799 |
| alanine.pcaec423               | -0.008810648 | 0.005589138 | 0.117242871 |
| pcaec340.c181                  | -0.014028203 | 0.008900318 | 0.117298484 |
| c181.citruline                 | 0.010834616  | 0.006874225 | 0.117304129 |

|                                 |              |             |             |
|---------------------------------|--------------|-------------|-------------|
| creatinine.pcaec300             | 0.026105685  | 0.016565424 | 0.117352008 |
| pcaac342.pcaec444               | 0.165623784  | 0.105118808 | 0.117427541 |
| pcaec361.pcaac385               | -0.066525022 | 0.04222349  | 0.117437057 |
| smc241.glutamicacid             | 0.056591901  | 0.035920556 | 0.117453523 |
| c142.pcaec360                   | -0.013317798 | 0.008453246 | 0.117455456 |
| pcaac426.c141oh                 | -0.186563909 | 0.118433888 | 0.117503402 |
| pcaac403.pcaac402               | -0.483253917 | 0.306784661 | 0.117511691 |
| pcaec421.citruline              | -0.010689068 | 0.006785942 | 0.117521768 |
| c18.pcaac405                    | 0.101047446  | 0.064153631 | 0.117543203 |
| c51.pcaec423                    | 0.023249065  | 0.014761147 | 0.117558861 |
| lysopcac182.smc160              | -0.125102796 | 0.079434932 | 0.117583909 |
| pcaec383.alanine                | -0.03608509  | 0.022917249 | 0.117659433 |
| leucine.pcaac402                | -0.090484473 | 0.057472432 | 0.117702016 |
| c4.citruline                    | 0.017271017  | 0.010969947 | 0.117702934 |
| pcaac380.smc240                 | -0.106600946 | 0.067719561 | 0.117758622 |
| pcaec406.pcaec361               | -0.020268728 | 0.012877161 | 0.117792619 |
| pcaec382.c182                   | -0.084538874 | 0.053710689 | 0.117801523 |
| c10.pcaec340                    | 0.060726601  | 0.038582571 | 0.117808168 |
| pcaac363.alphaaminoadipicacid   | 0.004626879  | 0.002940207 | 0.11787319  |
| pcaec444.lysopcac280            | -0.013931305 | 0.00885352  | 0.117902023 |
| putrescine.alphaaminoadipicacid | 0.005563272  | 0.003535692 | 0.117918819 |
| pcaec381.pcaac366               | 0.033603065  | 0.021361023 | 0.118001828 |
| pcaac420.pcaec340               | 0.049402381  | 0.031407775 | 0.11804054  |
| putrescine.pcaec340             | 0.097885654  | 0.062235208 | 0.118063861 |
| spermidine.pcaac320             | 0.200864917  | 0.127725872 | 0.118112268 |
| alanine.c101                    | 0.02009154   | 0.012776473 | 0.11813154  |
| lysopcac204.smc202              | -0.067595772 | 0.042987615 | 0.118153422 |
| phenylalanine.asymmetricdimeth  | 0.073613203  | 0.046818349 | 0.118184105 |
| pcaec384.smohc221               | 0.053478388  | 0.03401505  | 0.118211327 |
| c8.pcaec424                     | -0.021967965 | 0.013973744 | 0.118236629 |
| pcaec420.pcaac385               | -0.09878399  | 0.062843706 | 0.118280532 |
| pcaec425.pcaec340               | 0.037727991  | 0.024002703 | 0.118298374 |
| pcaec382.pcaac366               | 0.034658589  | 0.022050217 | 0.118303001 |
| lysopcac160.pcaec421            | -0.009773394 | 0.006218716 | 0.118347761 |
| smc160.alphaaminoadipicacid     | -0.014940203 | 0.009506325 | 0.118348529 |
| pcaec343.c101                   | -0.014405134 | 0.009166272 | 0.1183647   |
| pcaec405.pcaac366               | 0.046758293  | 0.029754537 | 0.118380747 |
| c102.c162                       | 0.183600319  | 0.116839158 | 0.118397919 |
| smc261.prolinr                  | -0.0624122   | 0.039719774 | 0.118416649 |
| pcaec385.pcaec322               | 0.13699187   | 0.087225667 | 0.118595022 |
| arginine.pcaec402               | 0.064039329  | 0.040775794 | 0.118600191 |
| pcaec342.serotonin              | -0.169261033 | 0.107778796 | 0.11861759  |
| pcaac421.tyrosine               | -0.104309439 | 0.066437829 | 0.118714711 |

|                                |              |             |             |
|--------------------------------|--------------|-------------|-------------|
| pcaec422.citruline             | -0.029406525 | 0.018731919 | 0.118754035 |
| pcaac385.pcaec443              | -0.070551741 | 0.044953849 | 0.118855503 |
| serotonin.asparticacid         | 0.081693187  | 0.052055845 | 0.11887613  |
| smc202.prolinr                 | 0.024033379  | 0.01531527  | 0.118898153 |
| c181.c101                      | -0.010938568 | 0.006972394 | 0.118992127 |
| pcaac240.pcaac365              | -0.135928275 | 0.086647242 | 0.11901192  |
| c162.phenylalanine             | 0.055656111  | 0.035478514 | 0.119018338 |
| glutamine.smc202               | 0.09281173   | 0.059167693 | 0.119042934 |
| pcaac422.lysopcac280           | -0.019293231 | 0.012300528 | 0.119074136 |
| pcaac363.pcaec365              | 0.047864559  | 0.030535394 | 0.119302242 |
| pcaac425.pcaec421              | 0.003529733  | 0.00225181  | 0.119302603 |
| c51.c16                        | -0.06540288  | 0.041725883 | 0.119318422 |
| pcaec342.pcaec361              | -0.015199711 | 0.009697799 | 0.119343024 |
| lysopcac280.asparticacid       | -0.095145321 | 0.060706432 | 0.119350976 |
| spermidine.citruline           | 0.039028051  | 0.024903437 | 0.119380616 |
| pcaac281.pcaac405              | 0.068499642  | 0.043709316 | 0.119383394 |
| ornithine.pcaac344             | -0.081891314 | 0.052265382 | 0.1194598   |
| pcaac403.pcaac422              | -0.148463428 | 0.094760103 | 0.119484896 |
| pcaac364.isoleucine            | 0.05979586   | 0.03816646  | 0.119488889 |
| c12.alphaaminoadipicacid       | -0.007126139 | 0.004548879 | 0.119522036 |
| smc260.smc202                  | 0.067200778  | 0.042903436 | 0.119579188 |
| pcaac361.citruline             | 0.005500977  | 0.003512545 | 0.119633412 |
| c101.citruline                 | -0.005479082 | 0.003498732 | 0.119650995 |
| pcaec382.alanine               | -0.041138802 | 0.026270004 | 0.119655782 |
| lysopcac203.smc240             | -0.087647007 | 0.055977826 | 0.119715255 |
| acetylmithoine.lysopcac204     | 0.09095661   | 0.058092009 | 0.119717947 |
| lysopcac170.pcaac281           | -0.007500014 | 0.00479108  | 0.119793339 |
| pcaec360.alphaaminoadipicacid  | 0.009081689  | 0.005801932 | 0.119822606 |
| pcaec380.smohc221              | 0.109971001  | 0.070289146 | 0.119995053 |
| pcaac403.pcaac366              | 0.046964059  | 0.030019902 | 0.120023428 |
| pcaac281.asparticacid          | 0.03589166   | 0.022954462 | 0.120217912 |
| histidine.pcaec361             | 0.011370943  | 0.007272451 | 0.120226998 |
| pcaec420.glycine               | 0.087480841  | 0.055951689 | 0.120240477 |
| pcaec343.pcaac360              | 0.075730184  | 0.048436677 | 0.120244773 |
| pcaac281.smohc161              | 0.057045156  | 0.03648793  | 0.120266032 |
| pcaec446.c181                  | -0.016000187 | 0.010234935 | 0.120291062 |
| asymmetricdimethylarginine.pca | 0.023166702  | 0.014819949 | 0.120310074 |
| c2.pcaec300                    | 0.049559803  | 0.031704588 | 0.120318581 |
| c2.c51                         | 0.139101545  | 0.088991114 | 0.120337332 |
| serotonin.glycine              | 0.061078364  | 0.039078728 | 0.12036978  |
| pcaec445.pcaec423              | 0.027829276  | 0.017805565 | 0.120370496 |
| pcaac344.lysopcac203           | 0.02988319   | 0.019124123 | 0.120455761 |
| pcaec360.c102                  | 0.106978616  | 0.068481189 | 0.120557205 |

|                               |              |             |             |
|-------------------------------|--------------|-------------|-------------|
| pcaac364.smohc222             | -0.009538157 | 0.006106511 | 0.120603225 |
| pcaac360.pcaac320             | 0.091125485  | 0.058344726 | 0.120631294 |
| glycine.c162                  | 0.113904309  | 0.072929325 | 0.120631537 |
| lysopcac181.c18               | -0.06105519  | 0.039106164 | 0.120767667 |
| creatinine.pcaec364           | 0.049183119  | 0.031502371 | 0.120771526 |
| pcaec422.pcaec380             | -0.206075604 | 0.13199691  | 0.120780009 |
| pcaec444.pcaec423             | 0.024923841  | 0.015964403 | 0.120780458 |
| pcaec401.pcaec405             | -0.111352556 | 0.071327465 | 0.120796475 |
| pcaac361.pcaac281             | 0.005744106  | 0.003680236 | 0.12087848  |
| pcaac383.c182                 | -0.073562899 | 0.047144978 | 0.1209831   |
| pcaac300.citruline            | 0.00799996   | 0.005127079 | 0.120987831 |
| creatinine.pcaac320           | -0.130333019 | 0.083531782 | 0.121000665 |
| pcaac343.c142                 | 0.030540446  | 0.019574583 | 0.121017518 |
| smohc161.c101                 | -0.029385819 | 0.018836016 | 0.12104647  |
| pcaec360.pcaac405             | -0.067179371 | 0.043063916 | 0.121068821 |
| pcaac323.pcaac240             | -0.020725053 | 0.013286795 | 0.121108729 |
| smohc241.pcaec404             | 0.017313429  | 0.011101364 | 0.12116702  |
| ornithine.c14                 | 0.044641882  | 0.028628524 | 0.121220712 |
| pcaac361.alphaaminoadipicacid | 0.009871485  | 0.006331261 | 0.121264266 |
| c16.pcaec382                  | -0.02551391  | 0.016364836 | 0.121287127 |
| kynurenine.asparagine         | -0.022650733 | 0.014528716 | 0.1212959   |
| c51.c102                      | 0.045854851  | 0.02941335  | 0.121307993 |
| pcaac380.pcaac362             | 0.073957327  | 0.04744241  | 0.121330367 |
| c102.smohc222                 | 0.02181725   | 0.013999478 | 0.121437711 |
| pcaec363.pcaec421             | 0.005371819  | 0.00344697  | 0.121441346 |
| smc260.serotonin              | -0.117298456 | 0.075268233 | 0.121444164 |
| c182.asparticacid             | 0.025405207  | 0.016302572 | 0.121456029 |
| c8.citruline                  | -0.008360447 | 0.005365116 | 0.121469833 |
| pcaec300.pcaac405             | 0.060004542  | 0.038511558 | 0.121518588 |
| acetylmithoine.pcaac381       | 0.038724517  | 0.024855659 | 0.121546067 |
| pcaec381.citruline            | -0.009761173 | 0.00626647  | 0.12161554  |
| pcaac281.pcaec340             | 0.12213636   | 0.078422191 | 0.121677684 |
| h1.pcaac323                   | 0.217172393  | 0.139460504 | 0.121722459 |
| c102.alphaaminoadipicacid     | 0.007380826  | 0.004739766 | 0.12172694  |
| ornithine.pcaec360            | -0.017593568 | 0.011298847 | 0.121751055 |
| c102.pcaec403                 | -0.109576697 | 0.07038477  | 0.12181939  |
| pcaec301.citruline            | -0.01413571  | 0.009082313 | 0.121920143 |
| pcaec322.smohc161             | 0.027068979  | 0.017392601 | 0.121931935 |
| smc260.lysopcac182            | -0.020785561 | 0.013355614 | 0.12193997  |
| pcaec301.smohc221             | -0.04711673  | 0.030275213 | 0.121948457 |
| c102.lysopcac280              | -0.008237747 | 0.005293577 | 0.12197293  |
| pcaec382.pcaec402             | -0.29703485  | 0.190876217 | 0.121976011 |
| smohc222.c141oh               | -0.152651434 | 0.09810324  | 0.122008424 |

|                                |              |             |             |
|--------------------------------|--------------|-------------|-------------|
| lysopcac140.c5                 | 0.01928814   | 0.012396654 | 0.122035399 |
| c142.pcaec421                  | 0.003647152  | 0.002344105 | 0.122043054 |
| pcaac300.pcaec443              | -0.05220994  | 0.033558129 | 0.122061319 |
| c51dc.pcaec383                 | 0.109877422  | 0.07062818  | 0.122082632 |
| pcaac386.c51                   | 0.129675647  | 0.083365996 | 0.122134588 |
| c51dc.pcaec300                 | 0.009597348  | 0.006170742 | 0.122182011 |
| pcaac401.pcaac366              | 0.072123481  | 0.046375677 | 0.122205403 |
| pcaac380.alphaaminoadipicacid  | 0.023865266  | 0.015347626 | 0.122257692 |
| pcaac386.asymmetricdimethylar; | 0.026453833  | 0.01702042  | 0.122434042 |
| lysopcac140.pcaec380           | -0.083517767 | 0.053746251 | 0.122508843 |
| pcaec340.smohc161              | -0.0437474   | 0.028154734 | 0.122534359 |
| smc241.pcaac365                | 0.094868492  | 0.061057183 | 0.122547658 |
| pcaac386.histidine             | -0.077828999 | 0.050093944 | 0.122572423 |
| pcaec445.lysopcac203           | -0.019999798 | 0.012872789 | 0.1225752   |
| lysopcac170.pcaac426           | -0.12263058  | 0.078931817 | 0.122580564 |
| c14.pcaac362                   | 0.076790463  | 0.049435156 | 0.122644868 |
| lysopcac140.pcaec423           | -0.017249035 | 0.011105441 | 0.122681056 |
| pcaec300.pcaec340              | -0.226157264 | 0.145616906 | 0.122706903 |
| c4.pcaec423                    | 0.024302171  | 0.015647968 | 0.122716836 |
| lysopcac203.lysopcac170        | -0.057393009 | 0.036969266 | 0.122861188 |
| pcaec322.c14                   | -0.038480864 | 0.024787425 | 0.122865257 |
| pcaac386.smc240                | -0.048838774 | 0.031459627 | 0.122867154 |
| arginine.pcaec382              | 0.024393591  | 0.015715827 | 0.122929281 |
| pcaec423.citruline             | -0.012117912 | 0.007807226 | 0.122935673 |
| pcaac383.alphaaminoadipicacid  | 0.007785842  | 0.00501635  | 0.122947023 |
| lysopcac161.alphaaminoadipicac | -0.00996757  | 0.006423075 | 0.123008122 |
| acetylmithoine.pcaec382        | -0.017194189 | 0.011081204 | 0.123052209 |
| pcaec362.c16                   | 0.079309908  | 0.051113496 | 0.123054679 |
| c8.pcaec382                    | -0.019310725 | 0.012445615 | 0.123062919 |
| alanine.pcaec300               | 0.02741493   | 0.017670936 | 0.123109664 |
| pcaec341.smohc161              | -0.044185116 | 0.028491772 | 0.123256015 |
| smc160.c101                    | -0.014262164 | 0.009196828 | 0.12326388  |
| lysine.pcaec300                | 0.039098717  | 0.025217115 | 0.12333257  |
| acetylmithoine.pcaec300        | -0.028499097 | 0.018383583 | 0.12338924  |
| c18.pcaec365                   | 0.04439049   | 0.028636041 | 0.123409765 |
| lysopcac180.pcaac281           | 0.004969802  | 0.003206401 | 0.123457455 |
| pcaec405.pcaec342              | 0.160139246  | 0.10332538  | 0.123483593 |
| pcaec322.pcaec362              | 0.074190231  | 0.047872734 | 0.123511244 |
| lysopcac140.citruline          | 0.00900355   | 0.005809728 | 0.123511697 |
| pcaec404.citruline             | -0.008063099 | 0.005203678 | 0.123568563 |
| c51.pcaec300                   | 0.027325972  | 0.017635853 | 0.123579214 |
| pcaec362.smohc221              | 0.037044591  | 0.02390905  | 0.123593514 |
| pcaec383.citruline             | -0.007853326 | 0.005069598 | 0.123664115 |

|                                |              |             |             |
|--------------------------------|--------------|-------------|-------------|
| pcaec403.citruline             | -0.010097727 | 0.006518802 | 0.123684905 |
| pcaac343.lysopcac280           | 0.022630205  | 0.014610787 | 0.123720043 |
| pcaac406.smc240                | -0.046576921 | 0.03007481  | 0.123760337 |
| pcaac421.alphaaminoadipicacid  | -0.009914449 | 0.006402173 | 0.123783219 |
| c182.citruline                 | 0.011710391  | 0.007562887 | 0.123832441 |
| ornithine.lysopcac203          | 0.026497884  | 0.017114837 | 0.123871371 |
| smohc141.pcaec342              | -0.23446747  | 0.151452316 | 0.123898607 |
| leucine.pcaec340               | -0.06016936  | 0.038867086 | 0.123909986 |
| pcaec384.alphaaminoadipicacid  | 0.00549375   | 0.003548798 | 0.12391503  |
| pcaec382.pcaec406              | 0.086688185  | 0.056004241 | 0.123956683 |
| pcaec382.citruline             | -0.008997235 | 0.005812689 | 0.123962701 |
| kynurenine.pcaec443            | -0.077225544 | 0.049891869 | 0.123963369 |
| putrescine.creatinine          | -0.028094888 | 0.018152106 | 0.123989894 |
| pcaec364.pcaec385              | 0.229558858  | 0.148318087 | 0.123990199 |
| c10.pcaec424                   | -0.022852569 | 0.014765598 | 0.124003888 |
| prolinr.valine                 | 0.112142713  | 0.072469309 | 0.124061445 |
| pcaec446.citruline             | -0.006565054 | 0.004242656 | 0.124075614 |
| c141oh.pcaec381                | -0.030272827 | 0.019567994 | 0.12415613  |
| smc181.valine                  | -0.19695003  | 0.127316917 | 0.124187671 |
| kynurenine.pcaac405            | 0.060756464  | 0.039278104 | 0.124211688 |
| smc181.pcaec362                | 0.033458121  | 0.021632976 | 0.124260385 |
| pcaac426.asymmetricdimethylar; | 0.034024374  | 0.02199947  | 0.124266711 |
| c8.pcaac406                    | 0.079374956  | 0.051330347 | 0.124325675 |
| lysopcac161.lysopcac280        | 0.015724272  | 0.010169293 | 0.124351035 |
| pcaac322.pcaac321              | -0.098021579 | 0.063394444 | 0.124359016 |
| creatinine.pcaac420            | 0.165428027  | 0.107004725 | 0.124414338 |
| pcaac323.pcaec423              | -0.010352045 | 0.006698822 | 0.124567758 |
| pcaac422.lysopcac161           | 0.112810147  | 0.073008202 | 0.124611788 |
| smc241.putrescine              | -0.057450032 | 0.037183066 | 0.124638832 |
| lysopcac170.smohc221           | -0.074126642 | 0.047978165 | 0.124651205 |
| pcaac365.lysopcac170           | 0.017596003  | 0.011389621 | 0.124673524 |
| pcaec423.pcaac363              | -0.051233727 | 0.033166753 | 0.124718063 |
| lysopcac160.pcaec404           | 0.032448707  | 0.021007899 | 0.124750948 |
| glutamine.pcaac366             | -0.028627386 | 0.01853494  | 0.124771847 |
| prolinr.pcaec385               | 0.081971319  | 0.053077134 | 0.124802868 |
| lysopcac180.c142               | -0.066584987 | 0.043114686 | 0.124805765 |
| c10.spermidine                 | 0.105248993  | 0.068155951 | 0.124837551 |
| pcaec322.c141oh                | -0.163497824 | 0.105916257 | 0.124979482 |
| pcaec443.citruline             | -0.015619939 | 0.010120277 | 0.125033241 |
| lysopcac140.pcaac362           | 0.025431814  | 0.016478616 | 0.125059381 |
| methionine.citruline           | 0.009304358  | 0.006028863 | 0.125064244 |
| smc261.pcaac320                | 0.063653895  | 0.041255835 | 0.125160208 |
| asparticacid.alanine           | -0.057465232 | 0.037247228 | 0.125184688 |



|                                |              |             |             |
|--------------------------------|--------------|-------------|-------------|
| pcaac383.pcaac366              | 0.094559652  | 0.061296989 | 0.125223037 |
| pcaac381.pcaec421              | 0.003869631  | 0.002508441 | 0.125223941 |
| pcaec443.pcaec383              | -0.277955507 | 0.180212405 | 0.125288671 |
| pcaac362.pcaac281              | 0.003189692  | 0.002068172 | 0.125313256 |
| pcaec404.pcaac366              | 0.035756943  | 0.023186565 | 0.125346138 |
| lysopcac180.lysopcac170        | 0.018131813  | 0.011757573 | 0.125346489 |
| lysopcac170.pcaac362           | -0.030340495 | 0.019674328 | 0.125347189 |
| c8.pcaec385                    | -0.05149121  | 0.033391276 | 0.125366739 |
| c10.citruline                  | -0.009251077 | 0.006000297 | 0.125436186 |
| leucine.pcaac405               | 0.135275368  | 0.087742207 | 0.125444303 |
| lysopcac181.pcaec380           | -0.067398936 | 0.043719406 | 0.125471388 |
| pcaac381.pcaac425              | -0.225158031 | 0.146057692 | 0.125484998 |
| pcaac386.alphaaminoadipicacid  | 0.004593611  | 0.002980093 | 0.125518308 |
| c16.pcaac362                   | 0.014727251  | 0.009554378 | 0.125522733 |
| pcaac403.pcaac405              | -0.090646228 | 0.058818328 | 0.125593704 |
| lysopcac182.lysine             | 0.107473549  | 0.069741756 | 0.125618178 |
| lysopcac204.lysopcac181        | -0.11545473  | 0.074927273 | 0.125650046 |
| c0.ornithine                   | -0.018237724 | 0.011835991 | 0.125655029 |
| smc240.lysopcac203             | -0.019762966 | 0.012826751 | 0.125681423 |
| glutamine.ornithine            | 0.044313946  | 0.02876153  | 0.1256875   |
| pcaac420.pcaac422              | -0.087103752 | 0.056539147 | 0.125722752 |
| h1.pcaac366                    | -0.041636382 | 0.027033319 | 0.125821222 |
| smc260.alphaaminoadipicacid    | -0.003726243 | 0.00241943  | 0.125834548 |
| pcaac343.pcaac403              | -0.029307909 | 0.019030189 | 0.125848766 |
| c51dc.pcaac320                 | -0.074076922 | 0.048101071 | 0.125860483 |
| smohc141.c51                   | 0.055866387  | 0.036278679 | 0.125885595 |
| pcaac323.pcaac420              | -0.12519551  | 0.081300934 | 0.125890693 |
| c141.pcaec385                  | -0.092366169 | 0.05998285  | 0.125897075 |
| lysopcac170.c5                 | -0.02905716  | 0.018870755 | 0.125916038 |
| c0.pcaec300                    | 0.011952554  | 0.0077646   | 0.126021726 |
| pcaec406.pcaac366              | -0.043638943 | 0.028351548 | 0.126059935 |
| c51dc.pcaec423                 | 0.038479024  | 0.025002404 | 0.126107643 |
| pcaec422.pcaec443              | -0.059107604 | 0.038406746 | 0.126113208 |
| smc202.smohc221                | 0.020654921  | 0.013422458 | 0.126151562 |
| pcaac361.pcaec405              | -0.092474411 | 0.060096552 | 0.126168412 |
| c142.citruline                 | -0.015146648 | 0.009844824 | 0.126223306 |
| pcaac422.alphaaminoadipicacid  | -0.007996043 | 0.005197966 | 0.126281186 |
| pcaac322.citruline             | 0.009311359  | 0.006054151 | 0.126352079 |
| asymmetricdimethylarginine.pca | 0.093657277  | 0.060901258 | 0.126390609 |
| pcaec360.c2                    | -0.104369802 | 0.067874293 | 0.1264302   |
| pcaec446.pcaac405              | -0.095838956 | 0.062367571 | 0.1266782   |
| lysopcac204.smohc222           | 0.005609884  | 0.003650756 | 0.126688786 |
| asymmetricdimethylarginine.pca | -0.059477762 | 0.03871216  | 0.126744102 |

|                                 |              |             |             |
|---------------------------------|--------------|-------------|-------------|
| pcaec383.lysopcac280            | -0.018055648 | 0.011752154 | 0.126754169 |
| lysopcac181.pcaec342            | 0.157999172  | 0.102852365 | 0.126801911 |
| pcaac426.pcaac341               | 0.013340511  | 0.008685025 | 0.12683585  |
| c0.pcaac342                     | -0.05484468  | 0.035711482 | 0.12690068  |
| alanine.alphaaminoadipicacid    | 0.01307664   | 0.008516209 | 0.126967297 |
| asymmetricdimethylarginine.pca  | -0.00972688  | 0.006335182 | 0.126998024 |
| pcaac381.citruline              | -0.010974996 | 0.007148746 | 0.127032657 |
| prolinr.creatinine              | -0.018344045 | 0.011951021 | 0.127105898 |
| c141.lysopcac182                | -0.043264618 | 0.028188483 | 0.127131015 |
| histidine.pcaec300              | -0.024814204 | 0.016170458 | 0.127203184 |
| pcaec340.pcaec443               | -0.050864141 | 0.033147262 | 0.127215325 |
| alanine.c181                    | 0.017567804  | 0.011448972 | 0.127226695 |
| pcaec342.pcaac360               | 0.076542425  | 0.049892235 | 0.127297653 |
| serotonin.tyrosine              | -0.115837429 | 0.075510053 | 0.127319471 |
| pcaec363.pcaec404               | -0.015577896 | 0.010154946 | 0.127330711 |
| pcaec384.pcaac385               | -0.049847505 | 0.032503145 | 0.127429014 |
| lysopcac181.pcaac362            | 0.028669499  | 0.01869473  | 0.127443912 |
| methionine.pcaec362             | -0.023150423 | 0.015098572 | 0.127511573 |
| c0.kynurenine                   | 0.025047907  | 0.016339798 | 0.127597021 |
| pcaac405.alphaaminoadipicacid   | 0.003176053  | 0.002072351 | 0.127684297 |
| pcaac385.alphaaminoadipicacid   | 0.002309295  | 0.001507062 | 0.127750403 |
| c141.c101                       | -0.026528466 | 0.017313774 | 0.127774752 |
| pcaec383.pcaec424               | -0.037454212 | 0.024447362 | 0.127819766 |
| smohc221.c162                   | 0.149060753  | 0.097321138 | 0.127917704 |
| pcaec383.pcaec340               | -0.093614896 | 0.061122723 | 0.127929776 |
| smc241.alphaaminoadipicacid     | -0.006225059 | 0.004064515 | 0.127936351 |
| pcaec421.pcaec445               | 0.191770348  | 0.125234373 | 0.12800321  |
| pcaec340.pcaac366               | 0.051106274  | 0.033389279 | 0.128169333 |
| pcaac281.c51                    | 0.062334794  | 0.040725573 | 0.128172683 |
| asymmetricdimethylarginine.lysc | 0.021927991  | 0.014326737 | 0.128182942 |
| c141oh.pcaec380                 | -0.045682984 | 0.029847456 | 0.128186781 |
| pcaac384.c18                    | -0.067629763 | 0.044186723 | 0.128187713 |
| pcaac363.pcaec404               | -0.016896825 | 0.011040946 | 0.128228906 |
| pcaac403.pcaac281               | -0.012491007 | 0.008162405 | 0.128245895 |
| pcaac385.kynurenine             | -0.010795897 | 0.007055034 | 0.128263051 |
| asparagine.pcaac426             | -0.041873523 | 0.027368066 | 0.128319025 |
| pcaac344.smc261                 | -0.067588201 | 0.04417906  | 0.12835475  |
| pcaac240.pcaec301               | 0.167835786  | 0.109721416 | 0.128408152 |
| lysine.smohc161                 | -0.017662424 | 0.011547402 | 0.128431807 |
| pcaac240.smc261                 | -0.128330029 | 0.083900375 | 0.128433239 |
| c5.lysopcac203                  | 0.182191865  | 0.119116873 | 0.128440821 |
| creatinine.pcaec404             | -0.048114934 | 0.031474398 | 0.128644276 |
| pcaac381.pcaac362               | -0.046879866 | 0.030674037 | 0.128737694 |

|                                 |              |             |             |
|---------------------------------|--------------|-------------|-------------|
| c51.smohc222                    | -0.006782306 | 0.004437938 | 0.128754552 |
| pcaec402.smohc221               | -0.093164247 | 0.0609633   | 0.128767913 |
| pcaec321.spermidine             | -0.104695404 | 0.068520191 | 0.128830568 |
| pcaac343.pcaac384               | 0.131818557  | 0.086280392 | 0.12886952  |
| pcaec341.c18                    | 0.047327516  | 0.030980112 | 0.128898972 |
| c10.lysine                      | 0.107669571  | 0.070480406 | 0.128904334 |
| c5.citruline                    | 0.011114354  | 0.007275681 | 0.128916576 |
| pcaec300.c2                     | -0.096242593 | 0.06300334  | 0.12892254  |
| glutamicacid.c181               | 0.0415248    | 0.027183881 | 0.128929214 |
| pcaec402.pcaac320               | 0.165023145  | 0.10804284  | 0.128970476 |
| pcaec383.pcaec406               | 0.090621154  | 0.059334754 | 0.12899531  |
| c51.lysopcac203                 | 0.016758208  | 0.01097416  | 0.129051355 |
| c181.pcaec382                   | -0.015870543 | 0.010393013 | 0.12905656  |
| pcaac406.pcaac402               | 0.113733977  | 0.074481326 | 0.129063132 |
| pcaec384.smc241                 | 0.189815051  | 0.124309935 | 0.12907888  |
| pcaec386.histidine              | -0.099135074 | 0.064925651 | 0.129090929 |
| pcaac385.lysopcac203            | -0.017634877 | 0.011550974 | 0.129140927 |
| creatinine.alphaaminoadipicacid | 0.003662775  | 0.002399395 | 0.129180632 |
| pcaac420.alphaaminoadipicacid   | -0.005816694 | 0.003810424 | 0.129185487 |
| pcaec384.c8                     | -0.081247744 | 0.053227147 | 0.129207107 |
| pcaac420.c51                    | 0.11784716   | 0.077227201 | 0.129320171 |
| alphaaminoadipicacid.smohc221   | 0.044138735  | 0.02893045  | 0.129393765 |
| c14.alphaaminoadipicacid        | -0.004655344 | 0.00305226  | 0.129511393 |
| pcaac300.c182                   | -0.074118096 | 0.048603457 | 0.12957546  |
| pcaec300.lysopcac204            | -0.031969975 | 0.020965035 | 0.129584563 |
| c18.pcaac421                    | -0.099240801 | 0.065125511 | 0.129853962 |
| pcaec406.glutamicacid           | 0.081347597  | 0.053384512 | 0.129862437 |
| pcaac300.prolinr                | -0.050453575 | 0.033114179 | 0.129907564 |
| glutamine.pcaec423              | -0.019518775 | 0.012811057 | 0.129916662 |
| pcaac384.alphaaminoadipicacid   | 0.002853888  | 0.0018735   | 0.129990648 |
| serine.alphaaminoadipicacid     | -0.001584845 | 0.001040566 | 0.130048388 |
| pcaec385.alphaaminoadipicacid   | 0.003364606  | 0.00220916  | 0.130057395 |
| lysopcac160.c182                | -0.057023609 | 0.037441952 | 0.130066888 |
| smohc222.alphaaminoadipicacid   | -0.031993773 | 0.021007443 | 0.130070348 |
| citruline.pcaec361              | -0.017266975 | 0.011338437 | 0.130095967 |
| c5.c2                           | 0.209747535  | 0.137748958 | 0.13014378  |
| smc261.alphaaminoadipicacid     | -0.008144561 | 0.005348871 | 0.130146373 |
| c12.citruline                   | -0.016180441 | 0.010626846 | 0.13016358  |
| c141oh.pcaec385                 | -0.069668997 | 0.045763597 | 0.130221977 |
| lysopcac182.smohc161            | 0.017768097  | 0.011671882 | 0.130238986 |
| histidine.pcaac281              | -0.00579371  | 0.003806157 | 0.130265227 |
| c141oh.lysopcac203              | -0.023393469 | 0.01536938  | 0.130293156 |
| serotonin.pcaec404              | 0.033069595  | 0.021734581 | 0.130434221 |

|                                  |              |             |             |
|----------------------------------|--------------|-------------|-------------|
| pcaec420.pcaac361                | 0.087049295  | 0.057216013 | 0.1304605   |
| pcaac362.c141oh                  | -0.163946465 | 0.10780767  | 0.130632009 |
| pcaec445.pcaac383                | -0.066354497 | 0.043637092 | 0.130665252 |
| pcaac424.citruline               | -0.011772159 | 0.007743734 | 0.130760911 |
| pcaac343.pcaac281                | 0.006812988  | 0.00448224  | 0.130816419 |
| pcaec403.alanine                 | -0.039025653 | 0.025675457 | 0.130825715 |
| pcaac385.smc161                  | -0.079268369 | 0.052157628 | 0.130869594 |
| lysopcac182.pcaec421             | -0.004598302 | 0.003025707 | 0.130879763 |
| pcaac383.lysopcac203             | 0.027445035  | 0.018060997 | 0.130922373 |
| pcaec422.pcaac402                | -0.169849396 | 0.111780782 | 0.130944546 |
| pcaac420.c14                     | -0.07578906  | 0.049884473 | 0.13099357  |
| methionine.alphaaminoadipicac    | 0.005203573  | 0.003425751 | 0.131077393 |
| c3.alphaaminoadipicacid          | 0.004918866  | 0.003238325 | 0.131078525 |
| pcaac323.alphaaminoadipicacid    | 0.008672934  | 0.005711304 | 0.131178667 |
| pcaac402.citruline               | -0.016061897 | 0.010577906 | 0.131208274 |
| pcaec445.tyrosine                | -0.064721096 | 0.042647005 | 0.131419467 |
| smohc161.pcaac366                | -0.068171873 | 0.044924166 | 0.131447761 |
| pcaec403.c12                     | 0.15805292   | 0.104160706 | 0.131471195 |
| asymmetricdimethylarginine.citru | 0.014594444  | 0.009618334 | 0.131480813 |
| c102.asparticacid                | -0.074427878 | 0.049054479 | 0.131507886 |
| pcaac404.pcaac323                | -0.219145435 | 0.144441674 | 0.131522913 |
| phenylalanine.pcaec300           | 0.022272564  | 0.014681029 | 0.131546015 |
| lysopcac160.asparticacid         | 0.030692288  | 0.020231348 | 0.131554183 |
| pcaec444.c181                    | -0.013056767 | 0.008607617 | 0.131599759 |
| pcaec423.asparticacid            | 0.054643587  | 0.036028729 | 0.131654827 |
| pcaec365.pcaac366                | 0.074736349  | 0.049282166 | 0.131697297 |
| pcaac366.pcaec301                | -0.18675134  | 0.123178772 | 0.131798038 |
| pcaec420.pcaac362                | -0.023376762 | 0.015420753 | 0.13184135  |
| pcaec363.c5                      | 0.027242099  | 0.017970586 | 0.131841723 |
| smc260.pcaec300                  | -0.022958011 | 0.015151052 | 0.132006596 |
| pcaec443.pcaec424                | -0.068481984 | 0.045205112 | 0.132097264 |
| lysopcac170.c141oh               | -0.14295415  | 0.09436964  | 0.132118738 |
| pcaec425.pcaac361                | 0.093505339  | 0.061727244 | 0.132123101 |
| c162.c2                          | 0.076275277  | 0.050385579 | 0.132372198 |
| pcaac344.smohe221                | 0.082019354  | 0.054186802 | 0.132420558 |
| pcaec321.c14                     | -0.055209053 | 0.036478156 | 0.132460687 |
| leucine.pcaac344                 | -0.111308653 | 0.073553262 | 0.132505276 |
| smc161.prolinr                   | 0.028815881  | 0.01904186  | 0.132509205 |
| smc202.c181                      | 0.023365662  | 0.015445918 | 0.132649079 |
| c51dc.pcaac322                   | -0.115357377 | 0.076266848 | 0.13269756  |
| pcaec420.alphaaminoadipicacid    | 0.00729745   | 0.004824722 | 0.132707046 |
| pcaec444.serotonin               | -0.14114766  | 0.093324213 | 0.1327243   |
| c181.asparticacid                | 0.028530452  | 0.018866077 | 0.132770581 |

|                               |              |             |             |
|-------------------------------|--------------|-------------|-------------|
| smohc222.lysopcac180          | 0.106064663  | 0.070146599 | 0.132826288 |
| smc260.pcaec343               | -0.106017493 | 0.070163961 | 0.133092509 |
| pcaec382.pcaec401             | 0.161889841  | 0.107143674 | 0.133101695 |
| pcaac401.citruline            | -0.011062844 | 0.007325581 | 0.133304031 |
| pcaac383.c18                  | 0.053725968  | 0.03557702  | 0.133312936 |
| c8.pcaec404                   | 0.036458752  | 0.024143544 | 0.133325261 |
| pcaec423.c181                 | -0.020996752 | 0.013904633 | 0.133332527 |
| pcaac361.lysopcac170          | 0.012541358  | 0.008305412 | 0.133340682 |
| h1.pcaec361                   | 0.043405452  | 0.028745632 | 0.13335041  |
| smohc222.pcaec362             | 0.030570239  | 0.020247615 | 0.133392481 |
| c182.kynurenine               | -0.024521965 | 0.016246687 | 0.133511773 |
| smohc241.c16                  | 0.105060078  | 0.069616443 | 0.13356905  |
| pcaec405.lysopcac161          | 0.093771295  | 0.062142548 | 0.13360901  |
| pcaec446.c51                  | 0.081321668  | 0.053894305 | 0.1336245   |
| pcaac363.pcaac366             | -0.055473656 | 0.03678167  | 0.133809173 |
| pcaac404.prolinr              | 0.089599773  | 0.059432755 | 0.133963979 |
| pcaac281.c2                   | -0.102335268 | 0.067881206 | 0.133968656 |
| pcaac401.pcaec300             | -0.060869597 | 0.040377791 | 0.133984564 |
| pcaec321.c181                 | -0.010633149 | 0.007054903 | 0.134061853 |
| lysopcac203.putrescine        | -0.070945922 | 0.047080063 | 0.134133389 |
| c102.citruline                | 0.082690783  | 0.054876611 | 0.134151679 |
| pcaec444.alphaaminoadipicacid | -0.003155809 | 0.002094333 | 0.13415606  |
| pcaac341.citruline            | 0.01483095   | 0.009844665 | 0.134242168 |
| c12.asparticacid              | 0.077372857  | 0.051360277 | 0.134248178 |
| putrescine.pcaec364           | 0.051659708  | 0.034295867 | 0.13429364  |
| smc180.smohc241               | 0.155483034  | 0.103236855 | 0.134348706 |
| smc261.glutamine              | -0.021536715 | 0.014303899 | 0.134458312 |
| pcaec423.glutamicacid         | 0.098043885  | 0.065121651 | 0.134484942 |
| c181.arginine                 | 0.068320079  | 0.045380254 | 0.134497107 |
| pcaac401.pcaec342             | 0.168588019  | 0.111982557 | 0.134501654 |
| pcaec425.pcaac344             | 0.069186559  | 0.045958353 | 0.134518611 |
| asparagine.pcaec361           | 0.010410273  | 0.00691536  | 0.134527463 |
| c141.pcaac426                 | -0.078519752 | 0.052162783 | 0.134553416 |
| pcaac361.pcaec443             | -0.035029014 | 0.023273015 | 0.134591614 |
| pcaac344.c12                  | 0.086487707  | 0.057473752 | 0.13467211  |
| c142.c181                     | -0.035767205 | 0.023769059 | 0.134682625 |
| c16.pcaec300                  | -0.037350496 | 0.02482132  | 0.134683989 |
| pcaac281.alphaaminoadipicacid | -0.00662931  | 0.004406663 | 0.134784665 |
| smc240.alphaaminoadipicacid   | -0.006812097 | 0.00452852  | 0.134814888 |
| pcaec445.citruline            | -0.012607162 | 0.008382039 | 0.134865571 |
| c0.pcaec402                   | -0.058805895 | 0.039103284 | 0.134919027 |
| pcaec364.c51dc                | -0.16774149  | 0.111541421 | 0.134921973 |
| c102.pcaac363                 | 0.026213334  | 0.017431568 | 0.134938475 |

|                                |              |             |             |
|--------------------------------|--------------|-------------|-------------|
| pcaac384.lysine                | 0.116124239  | 0.077242191 | 0.135043211 |
| prolinr.pcaec402               | -0.047867617 | 0.031843884 | 0.135090031 |
| pcaac406.pcaec383              | 0.15166428   | 0.100921361 | 0.13519309  |
| methionine.pcaec405            | -0.082493202 | 0.054899521 | 0.13523823  |
| acetylmithoine.alphaaminoadip  | -0.006399277 | 0.004260061 | 0.135358221 |
| c141oh.pcaec402                | -0.057248793 | 0.03812424  | 0.135492076 |
| pcaac420.citruline             | -0.013715571 | 0.009133807 | 0.135494816 |
| c18.asparticacid               | 0.026687818  | 0.017774127 | 0.135528114 |
| pcaac385.pcaac422              | -0.047027082 | 0.031320467 | 0.13553255  |
| c182.smohc241                  | -0.120536608 | 0.080289384 | 0.135585204 |
| leucine.lysopcac180            | 0.085320876  | 0.056834289 | 0.135599456 |
| pcaec443.pcaac361              | 0.073724518  | 0.049109966 | 0.135601747 |
| pcaac364.lysopcac280           | 0.012771804  | 0.008508629 | 0.135646107 |
| kynurenine.c2                  | 0.1063129    | 0.070828864 | 0.135661251 |
| smc181.smc160                  | -0.180013114 | 0.119936933 | 0.13568312  |
| pcaec423.lysopcac182           | -0.147803665 | 0.098484174 | 0.135712107 |
| pcaec322.lysopcac181           | 0.086800506  | 0.057849793 | 0.135799942 |
| c102.pcaec300                  | 0.011910215  | 0.007938104 | 0.135815684 |
| pcaac363.pcaec445              | 0.10171546   | 0.067796083 | 0.135833977 |
| pcaec364.pcaec366              | 0.063127856  | 0.042077922 | 0.135847923 |
| pcaac341.pcaec382              | 0.017809779  | 0.011872208 | 0.135883428 |
| pcaec424.pcaec405              | -0.081462528 | 0.054309354 | 0.135922573 |
| pcaac322.smohc221              | 0.060221338  | 0.040148834 | 0.135927745 |
| asymmetricdimethylarginine.pca | -0.066840796 | 0.044562841 | 0.135935532 |
| pcaac362.pcaec443              | -0.04864162  | 0.032431409 | 0.135959247 |
| glycine.pcaec404               | 0.051638939  | 0.034434787 | 0.136014961 |
| pcaac421.lysopcac204           | 0.074175241  | 0.049466483 | 0.136043557 |
| pcaac344.c142                  | 0.028753949  | 0.019177215 | 0.136075734 |
| citruline.alphaaminoadipicacid | 0.002989324  | 0.00199386  | 0.136105709 |
| lysopcac160.smohc221           | -0.061083851 | 0.040742743 | 0.136107768 |
| pcaac421.citruline             | -0.011424985 | 0.007621032 | 0.136138457 |
| pcaec363.pcaec381              | 0.05173302   | 0.034511617 | 0.136173629 |
| kynurenine.pcaac341            | 0.014846984  | 0.009904801 | 0.136182611 |
| pcaac422.citruline             | -0.015647055 | 0.010440122 | 0.136241181 |
| lysopcac140.alphaaminoadipicac | -0.004395019 | 0.002932737 | 0.136276409 |
| pcaac344.pcaec403              | -0.021288237 | 0.014207948 | 0.136347405 |
| pcaec321.kynurenine            | -0.016041799 | 0.010706586 | 0.136353021 |
| serotonin.smc160               | 0.144146699  | 0.09622055  | 0.136411385 |
| pcaec401.pcaec362              | 0.028791031  | 0.01921969  | 0.136434691 |
| c142.c14                       | -0.081576284 | 0.054464951 | 0.136492037 |
| pcaac361.c101                  | -0.025984232 | 0.017348747 | 0.136496549 |
| smohc241.alphaaminoadipicacid  | -0.004036159 | 0.002694896 | 0.136510412 |
| pcaec364.pcaec405              | -0.069643906 | 0.046509929 | 0.136589984 |

|                                |              |             |             |
|--------------------------------|--------------|-------------|-------------|
| pcaec362.pcaec361              | -0.017184291 | 0.011479619 | 0.136709412 |
| pcaec364.pcaec362              | 0.044930215  | 0.030018403 | 0.13675713  |
| pcaac384.smc161                | -0.074088749 | 0.049500116 | 0.136761494 |
| pcaec404.pcaec401              | 0.13424621   | 0.089721605 | 0.136887939 |
| c3.lysopcac170                 | -0.044932993 | 0.030031331 | 0.136900699 |
| pcaec425.alphaaminoadipicacid  | -0.004144266 | 0.002770019 | 0.136923934 |
| c141oh.c5                      | -0.013280191 | 0.00887665  | 0.136932552 |
| c5.alphaaminoadipicacid        | -0.015006364 | 0.010032633 | 0.137017481 |
| pcaec361.pcaac281              | -0.004682043 | 0.003130481 | 0.13705     |
| c18.pcaec385                   | -0.095907928 | 0.064138918 | 0.137132036 |
| pcaec301.tyrosine              | 0.069300546  | 0.046353397 | 0.137201856 |
| pcaec444.pcaac361              | 0.056462746  | 0.037767922 | 0.137216375 |
| c8.pcaac362                    | -0.0105283   | 0.007044822 | 0.137351661 |
| smc261.pcaec381                | -0.069456324 | 0.0464815   | 0.137402451 |
| methioninesulfoxide.alphaamino | -0.001603098 | 0.001072893 | 0.13742786  |
| c51dc.c12                      | -0.064612577 | 0.043248214 | 0.137476796 |
| pcaac321.citruline             | 0.010933755  | 0.007318814 | 0.137495001 |
| c10.pcaac320                   | -0.084296057 | 0.056445786 | 0.137632387 |
| asparticacid.pcaec404          | -0.05249969  | 0.035155994 | 0.1376489   |
| putrescine.pcaac341            | -0.017286461 | 0.011576183 | 0.137663858 |
| pcaac401.smohc222              | 0.042695013  | 0.02859393  | 0.137697484 |
| c8.alphaaminoadipicacid        | -0.00163743  | 0.001096633 | 0.137699224 |
| pcaec402.alphaaminoadipicacid  | -0.002323149 | 0.001556028 | 0.137736659 |
| pcaac425.pcaac362              | 0.031833131  | 0.021323803 | 0.137777159 |
| pcaec443.pcaac405              | -0.086305258 | 0.05782104  | 0.137834105 |
| asparticacid.c18               | 0.077203146  | 0.051727538 | 0.137868437 |
| pcaec321.c141oh                | -0.17039126  | 0.11418188  | 0.137925162 |
| pcaec406.glycine               | 0.084143258  | 0.056403106 | 0.138045567 |
| smc181.prolinr                 | 0.03028357   | 0.020300211 | 0.138054365 |
| pcaec423.alphaaminoadipicacid  | -0.005891224 | 0.003949658 | 0.138108762 |
| pcaec364.kynurenine            | -0.024810418 | 0.016640109 | 0.138260169 |
| leucine.pcaec443               | 0.078033704  | 0.052350576 | 0.138365684 |
| pcaec343.c16                   | 0.102300574  | 0.068636118 | 0.138397571 |
| arginine.pcaec360              | 0.013803544  | 0.009261817 | 0.138425433 |
| pcaec401.asparagine            | -0.018269254 | 0.012260625 | 0.138503132 |
| smohc222.pcaac362              | -0.010411914 | 0.006987533 | 0.138504459 |
| pcaac362.c5                    | 0.020801553  | 0.013960238 | 0.138507854 |
| pcaac364.c181                  | -0.010161909 | 0.006820831 | 0.138566408 |
| c16.glutamine                  | 0.03692881   | 0.024788103 | 0.138580802 |
| pcaec343.pcaec404              | -0.014554602 | 0.009770287 | 0.138606974 |
| lysopcac203.lysopcac280        | 0.01301244   | 0.00873531  | 0.13861831  |
| c101.pcaec300                  | 0.019160586  | 0.012863141 | 0.138635127 |
| lysopcac280.c51dc              | 0.187164834  | 0.125653714 | 0.138646701 |

|                                     |              |             |             |
|-------------------------------------|--------------|-------------|-------------|
| c162.c12                            | 0.119756214  | 0.080403628 | 0.138670605 |
| alphaaminoadipicacid.pcaac381       | 0.04182366   | 0.028082212 | 0.138699174 |
| pcaec406.pcaec421                   | 0.003277083  | 0.002200702 | 0.138757334 |
| pcaec341.lysopcac161                | 0.102293757  | 0.068698569 | 0.138779697 |
| smc260.pcaec385                     | -0.056452436 | 0.03791567  | 0.138813506 |
| c141oh.smohc241                     | -0.085097319 | 0.057160929 | 0.138856225 |
| pcaec443.c12                        | 0.110430268  | 0.074191285 | 0.138929639 |
| c10.alphaaminoadipicacid            | -0.002637181 | 0.001771765 | 0.138930989 |
| phenylalanine.kynurenine            | -0.008244087 | 0.005538769 | 0.138934989 |
| spermidine.alphaaminoadipicacid     | 0.033495106  | 0.022504611 | 0.138952555 |
| pcaac343.pcaec423                   | -0.010994235 | 0.007386956 | 0.138961869 |
| pcaac401.alphaaminoadipicacid       | -0.003087743 | 0.002074938 | 0.13901914  |
| pcaac420.c181                       | -0.02396695  | 0.016107843 | 0.139073914 |
| pcaec401.arginine                   | 0.09211956   | 0.061915666 | 0.139095649 |
| c4.smc161                           | 0.168767371  | 0.113447134 | 0.139146521 |
| pcaec384.asymmetricdimethylarginine | 0.042183966  | 0.028356552 | 0.139147403 |
| lysopcac180.lysopcac280             | 0.011524805  | 0.007747166 | 0.139150323 |
| c141.prolinr                        | -0.051323779 | 0.034504974 | 0.139198926 |
| pcaec362.c181                       | -0.025614531 | 0.017220856 | 0.139203663 |
| c16.smc181                          | 0.057201408  | 0.038457715 | 0.13921128  |
| smc160.pcaac366                     | -0.03806074  | 0.025590354 | 0.139231441 |
| pcaec406.transhydroxyproline        | 0.113866703  | 0.076565768 | 0.139266502 |
| alphaaminoadipicacid.pcaec423       | 0.022417852  | 0.015076027 | 0.139316187 |
| c141.pcaec443                       | -0.168640087 | 0.113415221 | 0.139332116 |
| glycine.creatinine                  | -0.023655505 | 0.015910939 | 0.139380067 |
| pcaec381.alphaaminoadipicacid       | -0.001966598 | 0.00132278  | 0.139387767 |
| pcaac365.leucine                    | -0.015773289 | 0.010609679 | 0.139394877 |
| pcaac402.alphaaminoadipicacid       | -0.003582229 | 0.002409809 | 0.139439377 |
| lysopcac180.pcaac420                | -0.105788033 | 0.071168557 | 0.139459608 |
| methioninesulfoxide.pcaec365        | 0.03283755   | 0.022092625 | 0.139482178 |
| ornithine.pcaac366                  | 0.024864208  | 0.016729197 | 0.139503754 |
| isoleucine.prolinr                  | -0.076355535 | 0.05138504  | 0.13959029  |
| glutamine.pcaec383                  | -0.07891147  | 0.053117338 | 0.139680707 |
| glutamicacid.alphaaminoadipicacid   | -0.001620995 | 0.001091452 | 0.139795378 |
| pcaac386.c141oh                     | -0.132599349 | 0.08928578  | 0.13981164  |
| arginine.pcaac361                   | 0.070188644  | 0.047262444 | 0.139819257 |
| pcaac406.arginine                   | 0.067913389  | 0.045735106 | 0.139859933 |
| c162.pcaac300                       | 0.075187976  | 0.050640762 | 0.139912022 |
| pcaec384.pcaac344                   | 0.122004054  | 0.082178785 | 0.13994245  |
| pcaac403.alphaaminoadipicacid       | -0.004247573 | 0.002861075 | 0.13994517  |
| pcaac344.pcaac361                   | -0.103396345 | 0.069652958 | 0.139986735 |
| pcaec423.lysopcac170                | 0.021405143  | 0.014420044 | 0.139999477 |
| pcaac385.lysopcac280                | 0.008925789  | 0.006013232 | 0.140011171 |



|                                   |              |             |             |
|-----------------------------------|--------------|-------------|-------------|
| asparagine.c8                     | -0.089798157 | 0.060503929 | 0.140060767 |
| asparticacid.alphaaminoadipicaci  | -0.000896867 | 0.000604307 | 0.140073014 |
| pcaec380.glycine                  | 0.073869013  | 0.049774199 | 0.140084153 |
| pcaac364.pcaac385                 | -0.057717357 | 0.038891453 | 0.140089363 |
| h1.c14                            | 0.133071356  | 0.089671596 | 0.140109815 |
| lysopcac170.asparticacid          | 0.030000402  | 0.020223777 | 0.140259148 |
| c3.c101                           | 0.029158133  | 0.019660472 | 0.140348887 |
| pcaec363.pcaec365                 | 0.044621814  | 0.030094899 | 0.140449905 |
| pcaac424.alphaaminoadipicacid     | -0.002203192 | 0.001485943 | 0.140453727 |
| phenylalanine.alphaaminoadipicaci | -0.002514012 | 0.001695734 | 0.140490416 |
| serotonin.c102                    | 0.083476451  | 0.056313089 | 0.140540294 |
| pcaac424.alphaaminoadipicacid     | -0.004170481 | 0.002814246 | 0.140658662 |
| spermidine.c182                   | -0.292223109 | 0.197260851 | 0.140795165 |
| leucine.c18                       | 0.071614797  | 0.048347471 | 0.140835684 |
| glycine.pcaec405                  | 0.077637525  | 0.052415    | 0.140847403 |
| pcaac425.smohc221                 | -0.08347314  | 0.056359399 | 0.140879801 |
| lysopcac180.asparticacid          | 0.024393419  | 0.016470234 | 0.140886601 |
| prolinr.c101                      | 0.017106548  | 0.011550839 | 0.140908439 |
| pcaac384.lysopcac161              | -0.110882778 | 0.074878138 | 0.140944556 |
| c51dc.pcaec404                    | -0.020487114 | 0.013835779 | 0.140973516 |
| lysopcac280.alphaaminoadipicaci   | -0.003052236 | 0.002061448 | 0.141002131 |
| c0.pcaec443                       | -0.118775202 | 0.080223629 | 0.141022267 |
| c12.lysopcac180                   | -0.075531123 | 0.051035354 | 0.141175458 |
| histidine.pcaec421                | -0.004902979 | 0.003313227 | 0.141217194 |
| smc161.pcaac384                   | 0.099096444  | 0.066967951 | 0.141233379 |
| pcaac365.pcaac366                 | 0.201231451  | 0.136018413 | 0.141317805 |
| pcaac366.asymmetricdimethylar     | 0.046152063  | 0.031195951 | 0.14132259  |
| pcaac381.alphaaminoadipicacid     | -0.002892612 | 0.00195547  | 0.141371642 |
| pcaec361.lysopcac161              | 0.09489389   | 0.064154142 | 0.141394707 |
| lysine.c14                        | 0.066130723  | 0.044709779 | 0.141406348 |
| c51.pcaac362                      | -0.014680139 | 0.009925892 | 0.141442814 |
| pcaec361.lysopcac280              | -0.024865011 | 0.016813028 | 0.141459101 |
| pcaec322.pcaec340                 | 0.095896137  | 0.064851149 | 0.141513006 |
| glycine.glutamine                 | 0.037345292  | 0.025259919 | 0.141585344 |
| c14.pcaec405                      | 0.065656088  | 0.044415667 | 0.14164455  |
| histidine.leucine                 | -0.023736778 | 0.016058422 | 0.141662676 |
| smc180.pcaac360                   | 0.104722628  | 0.070848879 | 0.141672997 |
| asparagine.alphaaminoadipicacid   | 0.003089323  | 0.00209023  | 0.141707946 |
| pcaec444.pcaac281                 | -0.003631618 | 0.002457154 | 0.141709216 |
| isoleucine.pcaac320               | -0.199184304 | 0.134772077 | 0.141720636 |
| kynurenine.c51                    | 0.097970679  | 0.066297605 | 0.141772423 |
| pcaac406.alphaaminoadipicacid     | 0.005221078  | 0.003533337 | 0.141793492 |
| pcaec444.pcaec362                 | 0.026744252  | 0.018099169 | 0.141796498 |

|                                |              |             |             |
|--------------------------------|--------------|-------------|-------------|
| pcaec361.lysopcac182           | -0.029255545 | 0.019800124 | 0.141825214 |
| c2.lysopcac280                 | 0.023965602  | 0.016220197 | 0.141832549 |
| pcaac384.pcaec446              | -0.068513826 | 0.046376911 | 0.141883362 |
| glutamine.pcaac402             | -0.153403933 | 0.103842066 | 0.141895405 |
| asparticacid.pcaac365          | -0.115018463 | 0.077863511 | 0.141922354 |
| pcaac424.c101                  | 0.031834779  | 0.021554648 | 0.141988519 |
| pcaec300.arginine              | -0.075460397 | 0.05109702  | 0.142022577 |
| smohc221.pcaac361              | 0.068693767  | 0.046516615 | 0.142035586 |
| pcaac426.lysopcac170           | 0.027982625  | 0.018950349 | 0.142070178 |
| pcaec342.pcaac365              | 0.039463134  | 0.026726758 | 0.142093828 |
| acetylmithoine.pcaec405        | -0.076153337 | 0.051589307 | 0.142199547 |
| pcaac365.pcaec300              | 0.061494834  | 0.041659616 | 0.142204904 |
| smohc241.citruline             | -0.013475859 | 0.00913284  | 0.142362368 |
| pcaac386.lysopcac182           | -0.018589815 | 0.012599865 | 0.142400125 |
| pcaac320.pcaec444              | 0.167384448  | 0.113462636 | 0.142442941 |
| pcaac421.glutamicacid          | 0.112621714  | 0.076343436 | 0.142453709 |
| pcaec404.c182                  | -0.057348103 | 0.038875584 | 0.142461279 |
| c101.c141oh                    | 0.167853787  | 0.113788097 | 0.14246841  |
| pcaec444.pcaec443              | -0.04714506  | 0.03195999  | 0.142472737 |
| c181.pcaac281                  | 0.015676708  | 0.010627495 | 0.142477859 |
| putrescine.pcaec382            | 0.029614786  | 0.020076612 | 0.142483128 |
| c141oh.pcaec300                | 0.031922047  | 0.021642232 | 0.142510024 |
| pcaac342.lysopcac182           | -0.026477998 | 0.017952735 | 0.142541178 |
| pcaac362.smohc161              | 0.04234628   | 0.028714635 | 0.142579994 |
| serine.c14                     | 0.109492229  | 0.074247419 | 0.142589143 |
| pcaac420.tyrosine              | -0.092445669 | 0.062691852 | 0.142613293 |
| lysopcac203.pcaec340           | -0.070440156 | 0.04777496  | 0.142663923 |
| c8.pcaac322                    | 0.061312386  | 0.041590893 | 0.142727802 |
| pcaac344.pcaac363              | 0.036538317  | 0.024787614 | 0.142760811 |
| pcaac384.pcaec444              | 0.126888063  | 0.086085695 | 0.142782747 |
| smc241.pcaac320                | 0.076411842  | 0.051846995 | 0.142830846 |
| pcaec321.pcaec340              | 0.138583462  | 0.094035705 | 0.142847703 |
| c102.arginine                  | 0.077757859  | 0.052766692 | 0.142878919 |
| pcaac403.pcaec404              | 0.060046955  | 0.040749545 | 0.142893712 |
| smc161.pcaac281                | 0.002834094  | 0.001923317 | 0.14289815  |
| c4.c51                         | 0.038704198  | 0.026267886 | 0.142925929 |
| pcaec445.pcaac344              | 0.086899122  | 0.058985998 | 0.142986652 |
| c142.pcaec403                  | 0.050521296  | 0.034307478 | 0.143151789 |
| asymmetricdimethylarginine.c18 | -0.042122334 | 0.028611828 | 0.143260409 |
| c141oh.putrescine              | -0.041999704 | 0.028529779 | 0.143277788 |
| pcaec405.smohc222              | -0.016368861 | 0.01111942  | 0.143288302 |
| c102.glutamine                 | 0.052815307  | 0.03587778  | 0.143290196 |
| pcaec403.alphaaminoadipicacid  | -0.002792222 | 0.001897074 | 0.143352981 |

|                                |              |             |             |
|--------------------------------|--------------|-------------|-------------|
| pcaac323.lysopcac281           | 0.033839178  | 0.022994213 | 0.14341179  |
| smohc222.tyrosine              | -0.115227308 | 0.078299856 | 0.143418006 |
| c4.pcaec385                    | -0.152757434 | 0.103826167 | 0.143508477 |
| lysopcac182.glutamine          | 0.028835343  | 0.019600267 | 0.143538115 |
| pcaec382.alphaaminoadipicacid  | -0.002532769 | 0.001721646 | 0.143548563 |
| pcaac405.smc240                | -0.04556701  | 0.030975547 | 0.143567013 |
| pcaec362.lysopcac180           | 0.135421252  | 0.092059801 | 0.143580509 |
| pcaec364.prolinr               | 0.047922753  | 0.032581923 | 0.14362786  |
| pcaec424.lysopcac180           | -0.088716334 | 0.06032149  | 0.143658527 |
| pcaec403.smc240                | -0.091381824 | 0.062141321 | 0.143706284 |
| pcaac405.pcaac426              | 0.094954874  | 0.064574628 | 0.14372824  |
| prolinr.pcaac363               | -0.048289308 | 0.032845261 | 0.14379881  |
| pcaac406.pcaec342              | 0.16751971   | 0.113951871 | 0.143829759 |
| pcaac383.pcaec382              | 0.009353485  | 0.006362749 | 0.143844182 |
| smc161.smohc221                | 0.024853625  | 0.016907404 | 0.14385874  |
| c3.smc260                      | 0.055728467  | 0.037911295 | 0.143862699 |
| pcaac320.kynurenine            | -0.023750654 | 0.016160451 | 0.143941798 |
| asymmetricdimethylarginine.smc | -0.013313487 | 0.009059385 | 0.143968342 |
| pcaec341.kynurenine            | -0.012596112 | 0.008572579 | 0.144030701 |
| c5.pcaec383                    | 0.167043585  | 0.113712744 | 0.144126329 |
| kynurenine.creatinine          | -0.014915698 | 0.010153741 | 0.144129203 |
| pcaec406.smc202                | 0.07472908   | 0.050875747 | 0.144164661 |
| c14.tyrosine                   | 0.08604527   | 0.058585551 | 0.144203477 |
| pcaec343.lysopcac180           | 0.118251339  | 0.080513906 | 0.144204676 |
| c4.alphaaminoadipicacid        | 0.005635238  | 0.003837233 | 0.144242396 |
| smc202.pcaec404                | -0.010878984 | 0.007408543 | 0.144277692 |
| lysopcac203.pcaac323           | -0.179032047 | 0.121946964 | 0.144365458 |
| pcaac343.c12                   | 0.067002321  | 0.045642247 | 0.144399346 |
| pcaec424.pcaec443              | -0.081901922 | 0.055794584 | 0.144418407 |
| pcaac360.pcaec361              | -0.02208708  | 0.015046969 | 0.144430111 |
| glutamine.alphaaminoadipicacid | 0.001594004  | 0.001085957 | 0.14444143  |
| pcaac342.lysopcac203           | 0.029341568  | 0.0199936   | 0.144519039 |
| pcaac381.smc202                | 0.072880016  | 0.049661617 | 0.144523374 |
| pcaec425.pcaec300              | 0.017411333  | 0.011864962 | 0.144543488 |
| c51.lysine                     | -0.152573299 | 0.103986597 | 0.144602677 |
| pcaac365.putrescine            | -0.085412976 | 0.05821714  | 0.144628541 |
| pcaac343.pcaec322              | 0.197362611  | 0.13454558  | 0.1446997   |
| phenylalanine.pcaec420         | 0.068847161  | 0.046937355 | 0.144725425 |
| pcaac384.pcaec363              | -0.047549944 | 0.032422394 | 0.144782785 |
| isoleucine.c182                | -0.090544163 | 0.061738628 | 0.144784114 |
| isoleucine.pcaec443            | 0.074537446  | 0.050834278 | 0.144862745 |
| pcaec422.c18                   | 0.067084158  | 0.045755068 | 0.144896798 |
| pcaec405.citruline             | -0.013082849 | 0.00892516  | 0.144983541 |

|                                |              |             |             |
|--------------------------------|--------------|-------------|-------------|
| pcaac361.pcaec340              | 0.115013641  | 0.078467008 | 0.145005641 |
| pcaac422.lysopcac204           | 0.090383233  | 0.061675922 | 0.145088363 |
| serotonin.alphaaminoadipicacid | 0.016467786  | 0.011237454 | 0.145092901 |
| smohc221.smohc222              | -0.02340516  | 0.015972474 | 0.145118508 |
| smohc222.c51                   | 0.05324447   | 0.036345769 | 0.14522766  |
| pcaac406.pcaac341              | 0.031534491  | 0.021526367 | 0.145232782 |
| lysopcac140.smohc141           | -0.048524157 | 0.033126383 | 0.145261359 |
| smc241.lysopcac203             | -0.018424921 | 0.01257915  | 0.145288619 |
| c14.c2                         | 0.108254716  | 0.073927521 | 0.145393124 |
| pcaec301.valine                | 0.110148815  | 0.075229963 | 0.145440669 |
| c4.kynurenine                  | -0.022105666 | 0.015098403 | 0.14545575  |
| pcaac385.pcaec404              | -0.014214512 | 0.009708668 | 0.14545603  |
| leucine.creatinine             | -0.018591291 | 0.012698874 | 0.145481744 |
| histidine.pcaec340             | -0.057849907 | 0.039518741 | 0.145522927 |
| pcaac363.c16                   | 0.066444757  | 0.045404014 | 0.145645394 |
| lysopcac161.pcaac281           | 0.004516889  | 0.003086554 | 0.145646333 |
| pcaec446.lysopcac180           | -0.073739295 | 0.050390989 | 0.145664134 |
| pcaec380.asymmetricdimethylar; | 0.051432859  | 0.035153221 | 0.145729084 |
| lysopcac281.lysopcac280        | 0.022247871  | 0.01520849  | 0.145796449 |
| smohc222.smc240                | 0.120978589  | 0.082707024 | 0.145829814 |
| pcaec424.pcaec405              | 0.191080891  | 0.130633228 | 0.145832136 |
| histidine.lysopcac160          | 0.058772633  | 0.040181269 | 0.145843278 |
| lysopcac280.c162               | -0.119897709 | 0.081993749 | 0.145955038 |
| asparagine.pcaec445            | -0.16746775  | 0.114532979 | 0.145982226 |
| pcaec340.asparagine            | 0.010256014  | 0.007014453 | 0.145996788 |
| pcaec405.pcaac403              | -0.031340234 | 0.021435753 | 0.146016441 |
| pcaac425.alphaaminoadipicacid  | -0.004590064 | 0.003139542 | 0.146026611 |
| citruline.pcaac341             | -0.009952589 | 0.006807518 | 0.146031403 |
| pcaac383.lysopcac280           | 0.009984759  | 0.006830172 | 0.14606948  |
| lysopcac140.pcaec403           | -0.128742019 | 0.08809493  | 0.146195287 |
| smc261.pcaec322                | -0.138891926 | 0.095041536 | 0.146200673 |
| kynurenine.pcaac320            | -0.084562575 | 0.057868312 | 0.1462248   |
| pcaec361.pcaec443              | -0.081923451 | 0.056069028 | 0.146272889 |
| pcaec443.alphaaminoadipicacid  | -0.002814112 | 0.001926068 | 0.146287182 |
| pcaac422.pcaec362              | 0.018743216  | 0.012833431 | 0.146442457 |
| smc202.pcaec381                | -0.030762879 | 0.021063809 | 0.146452837 |
| pcaec360.smc202                | 0.071347821  | 0.04885481  | 0.146468229 |
| pcaac341.c8                    | -0.065925034 | 0.045143994 | 0.14648945  |
| pcaec361.alphaaminoadipicacid  | -0.002811847 | 0.001925593 | 0.146510762 |
| pcaec401.lysopcac170           | 0.015753637  | 0.010789411 | 0.146551489 |
| pcaec402.pcaec404              | 0.03736944   | 0.025594791 | 0.14656822  |
| pcaec444.c182                  | -0.06589762  | 0.045135904 | 0.146584287 |
| smc181.c14                     | -0.040732375 | 0.027902316 | 0.146628668 |

|                                |              |             |             |
|--------------------------------|--------------|-------------|-------------|
| pcaec383.pcaec360              | -0.012545655 | 0.008594253 | 0.146641832 |
| pcaec360.histidine             | -0.104082529 | 0.071301835 | 0.1466493   |
| acetylornithoine.glutamine     | -0.031440742 | 0.021540532 | 0.146686922 |
| pcaec384.spermidine            | -0.101639832 | 0.069635536 | 0.146690015 |
| lysopcac281.c12                | 0.086551313  | 0.059345485 | 0.147010465 |
| pcaec321.asparagine            | 0.00945679   | 0.006484705 | 0.14704045  |
| pcaec383.alphaaminoadipicacid  | -0.003238414 | 0.002222145 | 0.14731169  |
| c2.alphaaminoadipicacid        | 0.002434639  | 0.001670758 | 0.147347679 |
| pcaec360.pcaec402              | 0.099743568  | 0.068449821 | 0.147355571 |
| pcaec444.valine                | 0.092565099  | 0.063527121 | 0.147378211 |
| asparticacid.pcaec382          | -0.021107434 | 0.014487624 | 0.147424282 |
| pcaec404.alanine               | -0.030450459 | 0.020902418 | 0.147462174 |
| lysopcac140.c12                | -0.1199855   | 0.082364525 | 0.147470262 |
| pcaec363.prolinr               | 0.033429921  | 0.022950667 | 0.14751515  |
| c181.c51                       | 0.089682919  | 0.061593568 | 0.147668441 |
| asparagine.smohc161            | -0.021462713 | 0.014741068 | 0.14768574  |
| lysopcac281.pcaec443           | -0.075148325 | 0.051621151 | 0.147745031 |
| pcaec380.pcaec423              | -0.022345091 | 0.015352958 | 0.147839044 |
| c14.pcaec402                   | -0.061482318 | 0.042246603 | 0.147868335 |
| c2.pcaec322                    | 0.097744961  | 0.067174139 | 0.14792961  |
| pcaec385.arginine              | 0.050551183  | 0.034740756 | 0.147929807 |
| h1.c5                          | -0.031323886 | 0.021530834 | 0.148001378 |
| pcaec421.pcaec422              | -0.296655342 | 0.203938493 | 0.148058645 |
| c141oh.pcaec406                | -0.014756968 | 0.010146513 | 0.148125934 |
| pcaec365.kynurenine            | -0.017960423 | 0.01234931  | 0.148131953 |
| pcaec380.pcaec361              | 0.125649293  | 0.086465746 | 0.148463743 |
| c8.lysine                      | 0.10664539   | 0.073389005 | 0.148468259 |
| pcaec382.pcaec421              | -0.008773386 | 0.006038433 | 0.148531379 |
| pcaec401.asymmetricdimethylar; | 0.050990534  | 0.035104347 | 0.148637497 |
| pcaec406.pcaec443              | -0.052330309 | 0.036032539 | 0.148702667 |
| lysopcac182.asymmetricdimethy  | 0.032970322  | 0.022707251 | 0.148795304 |
| pcaec321.pcaec361              | -0.012883953 | 0.008874703 | 0.148854103 |
| pcaec360.pcaec421              | 0.002798211  | 0.001927777 | 0.148920644 |
| pcaec342.asymmetricdimethylar; | 0.039918624  | 0.027502639 | 0.14894149  |
| pcaec362.lysopcac182           | -0.019624428 | 0.013522406 | 0.148995496 |
| pcaec425.pcaec381              | 0.036390281  | 0.025077289 | 0.149030993 |
| pcaec240.alphaaminoadipicacid  | -0.004781566 | 0.00329512  | 0.149036572 |
| pcaec341.smohc241              | 0.14807681   | 0.102062813 | 0.149110247 |
| pcaec404.putrescine            | -0.086567363 | 0.059676572 | 0.149174547 |
| pcaec443.lysopcac161           | 0.109648052  | 0.075592592 | 0.149201157 |
| pcaec343.prolinr               | 0.029885212  | 0.020603522 | 0.149207471 |
| pcaec384.lysopcac182           | -0.051410099 | 0.035448341 | 0.149265426 |
| pcaec404.pcaec405              | -0.089216283 | 0.061524677 | 0.14931911  |

|                                 |              |             |             |
|---------------------------------|--------------|-------------|-------------|
| lysopcac140.pcaec301            | -0.085076579 | 0.058675262 | 0.149356109 |
| ornithine.smohc141              | -0.041332293 | 0.028506414 | 0.149363605 |
| pcaec403.pcaec424               | -0.035714768 | 0.024638508 | 0.149469127 |
| prolinr.ornithine               | -0.060301668 | 0.041607799 | 0.149542466 |
| creatinine.c5                   | 0.026454793  | 0.018254572 | 0.149562817 |
| lysopcac140.c101                | -0.017873102 | 0.012337032 | 0.149696296 |
| lysopcac180.pcaec380            | -0.062462708 | 0.043119876 | 0.149739049 |
| pcaac385.smc202                 | 0.049837885  | 0.034409743 | 0.149799666 |
| pcaec380.pcaac385               | -0.082093064 | 0.056689178 | 0.149866575 |
| pcaac384.serine                 | -0.071190544 | 0.049161919 | 0.149878513 |
| alphaaminoadipicacid.lysopcac21 | 0.042788257  | 0.029549324 | 0.14989382  |
| arginine.pcaec424               | -0.020713746 | 0.014309559 | 0.150028538 |
| pcaec341.pcaac402               | -0.075223401 | 0.051976357 | 0.150107942 |
| isoleucine.pcaec362             | -0.015362621 | 0.010617777 | 0.150215497 |
| h1.alphaaminoadipicacid         | -0.005848072 | 0.004042106 | 0.150240352 |
| c181.pcaec404                   | -0.022630382 | 0.015641994 | 0.150245244 |
| lysine.pcaac361                 | 0.075657263  | 0.052298642 | 0.150282118 |
| pcaac300.pcaac426               | 0.113027436  | 0.07814467  | 0.150352675 |
| c10.pcaac362                    | -0.011853287 | 0.00819521  | 0.150358099 |
| pcaec343.c142                   | 0.051411488  | 0.035556115 | 0.15048194  |
| acetylornithoine.c3             | 0.063570566  | 0.043979736 | 0.150614761 |
| pcaec363.pcaec340               | 0.125086512  | 0.086539926 | 0.150623623 |
| pcaec444.lysopcac181            | -0.092814441 | 0.06421752  | 0.150653421 |
| pcaec342.pcaec404               | -0.01502873  | 0.010399007 | 0.1506829   |
| pcaac421.lysopcac161            | 0.128757303  | 0.089095584 | 0.150696652 |
| pcaec404.pcaac365               | -0.08766081  | 0.060662157 | 0.150722834 |
| histidine.pcaac403              | -0.010247391 | 0.007091521 | 0.1507356   |
| lysopcac170.lysine              | 0.113186265  | 0.078342732 | 0.150809263 |
| c101.alphaaminoadipicacid       | 0.016309316  | 0.01129298  | 0.150965927 |
| lysopcac182.serotonin           | -0.161911816 | 0.112128117 | 0.151024926 |
| pcaac384.arginine               | 0.04622516   | 0.032013567 | 0.151043291 |
| citruiline.lysopcac280          | -0.016947085 | 0.011738556 | 0.151103108 |
| asparagine.pcaac366             | -0.039056706 | 0.027054375 | 0.151123848 |
| c181.putrescine                 | -0.059444369 | 0.041180772 | 0.151162952 |
| smc261.serotonin                | -0.095039658 | 0.065842871 | 0.151181765 |
| lysopcac280.lysopcac170         | -0.066618627 | 0.046162229 | 0.151263232 |
| lysopcac181.c3                  | -0.115026736 | 0.079708443 | 0.151276727 |
| pcaec382.ornithine              | -0.058729296 | 0.040712013 | 0.15142838  |
| acetylornithoine.smc181         | 0.047917355  | 0.033219395 | 0.151457452 |
| c162.asparagine                 | -0.011393684 | 0.007899279 | 0.151480294 |
| serine.c51dc                    | 0.179389976  | 0.124398864 | 0.151569065 |
| lysopcac161.citruiline          | 0.012933297  | 0.00897081  | 0.151666511 |
| lysopcac180.pcaec342            | 0.141939104  | 0.098482266 | 0.151791455 |

|                               |              |             |             |
|-------------------------------|--------------|-------------|-------------|
| creatinine.lysopcac204        | -0.037496724 | 0.026017042 | 0.151799525 |
| pcaec403.pcaac405             | -0.085564469 | 0.059369572 | 0.151805009 |
| c4.pcaec404                   | -0.025457051 | 0.017666065 | 0.151862356 |
| c142.smc181                   | -0.03169397  | 0.02199933  | 0.151956974 |
| c182.c101                     | -0.015546347 | 0.010791154 | 0.151963251 |
| c3.pcaac300                   | -0.08060457  | 0.055954341 | 0.151995634 |
| glycine.leucine               | -0.034129209 | 0.02369426  | 0.152035721 |
| pcaec401.c182                 | -0.041224734 | 0.028620994 | 0.152045017 |
| pcaec300.valine               | 0.09256579   | 0.064267609 | 0.152058851 |
| methioninesulfoxide.pcaac366  | 0.041529735  | 0.028834485 | 0.152069531 |
| methionine.asymmetricdimethyl | 0.027564572  | 0.019145388 | 0.152219272 |
| pcaec422.lysopcac161          | 0.117041311  | 0.081307328 | 0.152291973 |
| pcaac322.alanine              | -0.064403703 | 0.044745866 | 0.152340289 |
| methioninesulfoxide.prolinr   | -0.09298267  | 0.064614216 | 0.152419004 |
| pcaac240.pcaac405             | -0.08670217  | 0.060260582 | 0.152491449 |
| pcaac342.smohc221             | 0.040887925  | 0.028420148 | 0.152517609 |
| c8.glutamine                  | 0.037529199  | 0.026088134 | 0.152557427 |
| pcaec362.pcaec385             | -0.100026224 | 0.069536727 | 0.152582412 |
| pcaac341.serotonin            | -0.175730217 | 0.122176673 | 0.152621305 |
| arginine.alphaaminoadipicacid | -0.002302943 | 0.00160113  | 0.152622594 |
| pcaac320.lysopcac203          | 0.020184908  | 0.014035138 | 0.152666393 |
| pcaac321.pcaec362             | -0.047374203 | 0.032940779 | 0.152668293 |
| pcaac421.pcaec342             | 0.167650056  | 0.116574884 | 0.152677045 |
| pcaac404.pcaec363             | -0.072700645 | 0.050559393 | 0.152735481 |
| pcaec405.alphaaminoadipicacid | -0.005469823 | 0.003804097 | 0.15274927  |
| arginine.serine               | 0.085924656  | 0.059759119 | 0.152756865 |
| pcaec386.pcaec365             | -0.052985361 | 0.0368511   | 0.152764534 |
| smohc221.alphaaminoadipicacid | -0.006711135 | 0.004668939 | 0.15288434  |
| pcaac424.alanine              | -0.030747561 | 0.021391334 | 0.152888984 |
| lysopcac161.c51               | -0.122298594 | 0.085087761 | 0.152906284 |
| pcaac386.pcaec405             | 0.114385945  | 0.079593449 | 0.152961682 |
| pcaac384.pcaec362             | -0.019544636 | 0.013600687 | 0.152988531 |
| pcaac403.lysopcac280          | -0.019186309 | 0.013354963 | 0.153099274 |
| pcaec362.prolinr              | 0.037121788  | 0.025843046 | 0.153158979 |
| pcaec443.c18                  | 0.085017905  | 0.059188563 | 0.153170797 |
| pcaac425.pcaac381             | 0.141257148  | 0.098350892 | 0.153208804 |
| pcaac281.lysopcac280          | 0.010733611  | 0.00747353  | 0.153220107 |
| pcaec361.citruline            | -0.03397878  | 0.023659123 | 0.153230403 |
| pcaac366.c142                 | 0.052354128  | 0.036461779 | 0.153320643 |
| pcaac425.kynurenine           | -0.026325719 | 0.018337487 | 0.153388895 |
| pcaec401.pcaac385             | -0.070571896 | 0.049164636 | 0.153446654 |
| pcaec341.pcaac344             | 0.101428176  | 0.070678175 | 0.153545973 |
| pcaec343.creatinine           | -0.029111555 | 0.020294403 | 0.153719115 |

|                               |              |             |             |
|-------------------------------|--------------|-------------|-------------|
| histidine.smohc161            | -0.016532172 | 0.011525332 | 0.153731023 |
| pcaac344.pcaac420             | -0.128482083 | 0.089584721 | 0.153794833 |
| spermidine.asymmetricdimethyl | 0.15510352   | 0.108149985 | 0.153807466 |
| pcaac384.smc160               | -0.173760141 | 0.121159053 | 0.153808314 |
| c8.smohc222                   | 0.003875892  | 0.002702672 | 0.153823391 |
| smohc241.lysopcac182          | -0.035579904 | 0.024810079 | 0.15382494  |
| pcaac405.pcaac320             | -0.175232147 | 0.122213892 | 0.153903408 |
| lysopcac161.c12               | 0.114858296  | 0.080120477 | 0.153973378 |
| lysopcac204.pcaec421          | 0.013276074  | 0.009262884 | 0.154063158 |
| pcaec322.pcaec386             | 0.051407245  | 0.035869788 | 0.154089447 |
| lysopcac182.smc181            | -0.034966182 | 0.024398338 | 0.154096554 |
| pcaac383.smohc141             | -0.034864868 | 0.02432821  | 0.154106061 |
| pcaac421.pcaac405             | -0.07497582  | 0.052320157 | 0.154130244 |
| pcaec445.lysopcac180          | -0.054921638 | 0.038339699 | 0.15427845  |
| c162.pcaac362                 | -0.049282512 | 0.034403432 | 0.154281942 |
| smohc141.pcaec361             | -0.022034577 | 0.01538317  | 0.154312253 |
| pcaec343.glycine              | 0.072832275  | 0.05084867  | 0.15432601  |
| pcaac363.pcaec361             | -0.018518667 | 0.012929337 | 0.154336219 |
| pcaac323.kynurenine           | -0.006418356 | 0.004481449 | 0.154362649 |
| pcaac424.pcaac366             | 0.051513766  | 0.035974248 | 0.154432171 |
| pcaec404.alphaaminoadipicacid | -0.006410475 | 0.004478431 | 0.154589769 |
| pcaec382.lysopcac160          | 0.128293711  | 0.089631725 | 0.154609296 |
| glycine.pcaec300              | -0.032855225 | 0.022955135 | 0.154627226 |
| pcaec385.putrescine           | -0.092604441 | 0.06471383  | 0.154711957 |
| smc240.citruline              | -0.016163029 | 0.011295913 | 0.154743351 |
| c18.pcaac281                  | -0.002989276 | 0.002089202 | 0.15475825  |
| pcaac320.c2                   | -0.072450556 | 0.050641807 | 0.154808298 |
| pcaec405.pcaac385             | -0.059617441 | 0.041672233 | 0.154813934 |
| c0.alphaaminoadipicacid       | 0.016113818  | 0.011264095 | 0.154836962 |
| c142.pcaec362                 | 0.026811437  | 0.018742466 | 0.154845234 |
| pcaec406.alphaaminoadipicacid | 0.008729034  | 0.006102518 | 0.154879426 |
| pcaac363.pcaac281             | 0.00845439   | 0.005910866 | 0.154903911 |
| pcaac404.pcaec365             | 0.040813767  | 0.028535734 | 0.154916672 |
| c162.pcaec361                 | -0.01985675  | 0.01388414  | 0.154943499 |
| pcaac322.spermidine           | -0.103201177 | 0.072160176 | 0.154945501 |
| pcaac300.kynurenine           | -0.016879269 | 0.01180311  | 0.154973696 |
| c51dc.kynurenine              | 0.012730581  | 0.008903261 | 0.15502845  |
| glutamicacid.asparagine       | 0.023891156  | 0.016708567 | 0.155029556 |
| smc160.pcaec362               | 0.018454638  | 0.012908234 | 0.155085478 |
| pcaac362.pcaac406             | -0.076658402 | 0.053645308 | 0.15528434  |
| pcaac341.pcaec445             | 0.047271621  | 0.033082809 | 0.155312579 |
| pcaec405.alanine              | -0.024429674 | 0.017098699 | 0.155353669 |
| pcaac341.asparagine           | 0.013278155  | 0.009294437 | 0.155391396 |



|                                |              |             |             |
|--------------------------------|--------------|-------------|-------------|
| c16.lysopcac170                | -0.078805517 | 0.055168813 | 0.155440189 |
| pcaac421.leucine               | -0.031840998 | 0.022291623 | 0.155457195 |
| pcaac421.pcaac361              | 0.103108172  | 0.072192713 | 0.155499943 |
| lysopcac281.pcaec382           | 0.051550201  | 0.036095515 | 0.155521303 |
| lysopcac204.lysopcac170        | -0.03918707  | 0.027440854 | 0.155551479 |
| lysopcac204.lysopcac280        | 0.012810457  | 0.008971249 | 0.155583101 |
| pcaec322.pcaac381              | 0.052931889  | 0.037069521 | 0.155593771 |
| smc241.pcaec383                | -0.132936335 | 0.093100269 | 0.155600996 |
| pcaec421.leucine               | -0.123756738 | 0.086673554 | 0.15561093  |
| pcaec404.pcaac385              | -0.059031283 | 0.041355577 | 0.155737673 |
| isoleucine.lysopcac180         | 0.086237323  | 0.06042623  | 0.15581176  |
| pcaac383.smc181                | -0.049240763 | 0.034510597 | 0.15590391  |
| pcaac420.c142                  | 0.086269616  | 0.060468068 | 0.155942235 |
| pcaac365.pcaec380              | -0.092022259 | 0.06451483  | 0.15603534  |
| pcaac364.smc161                | -0.064293801 | 0.045080998 | 0.156089976 |
| putrescine.serotonin           | 0.138328491  | 0.097009353 | 0.156163342 |
| pcaec386.isoleucine            | 0.069515933  | 0.048761455 | 0.156248822 |
| pcaac406.pcaec382              | 0.012530139  | 0.008789544 | 0.156265984 |
| glutamicacid.pcaec443          | 0.153349678  | 0.107596846 | 0.156366549 |
| c51dc.pcaac406                 | 0.098217771  | 0.068937585 | 0.15650793  |
| pcaec423.lysine                | 0.142714236  | 0.100181941 | 0.156561113 |
| pcaec362.asparticacid          | 0.038998802  | 0.027379064 | 0.156603918 |
| c181.c14                       | -0.06131331  | 0.043048745 | 0.156640287 |
| spermidine.kynurenine          | -0.063105837 | 0.044312403 | 0.156687697 |
| pcaac401.c181                  | -0.022862784 | 0.016060827 | 0.15686114  |
| kynurenine.alphaaminoadipicaci | 0.006442134  | 0.004526723 | 0.156970498 |
| pcaec321.smohc161              | 0.048100209  | 0.033801239 | 0.157000366 |
| leucine.pcaec362               | -0.018366819 | 0.012907512 | 0.157022118 |
| smc240.lysopcac160             | 0.051733712  | 0.036357396 | 0.157032099 |
| c181.pcaec406                  | -0.0126742   | 0.008907947 | 0.157068094 |
| c5.pcaec424                    | -0.035353623 | 0.024849254 | 0.157089279 |
| pcaec360.pcaec445              | 0.084574789  | 0.059492336 | 0.157412493 |
| pcaec342.transhydroxyproline   | 0.049392042  | 0.034744593 | 0.157422119 |
| pcaec445.pcaac406              | -0.050255721 | 0.035352226 | 0.157423082 |
| pcaac322.leucine               | -0.010782625 | 0.007585407 | 0.157445005 |
| prolinr.pcaec301               | 0.102319235  | 0.071983031 | 0.157462558 |
| pcaec321.pcaac341              | 0.024406656  | 0.017171124 | 0.15747925  |
| lysopcac203.c141               | 0.039218165  | 0.027598038 | 0.157574673 |
| pcaec321.pcaac403              | -0.011564108 | 0.008138414 | 0.157609524 |
| pcaec386.lysopcac182           | -0.017471325 | 0.012295966 | 0.157618226 |
| pcaec341.c16                   | 0.06089649   | 0.042859849 | 0.157638711 |
| pcaec322.pcaec404              | -0.009781428 | 0.006885733 | 0.157723748 |
| pcaac300.c8                    | -0.069863675 | 0.049183607 | 0.157743727 |

|                                 |              |             |             |
|---------------------------------|--------------|-------------|-------------|
| pcaac422.asparagine             | -0.015843137 | 0.011155416 | 0.157815578 |
| smc261.pcaec444                 | -0.166941127 | 0.117546177 | 0.157816133 |
| kynurenine.c101                 | -0.022128336 | 0.015582914 | 0.157868144 |
| pcaec341.c51                    | 0.073075137  | 0.051465676 | 0.157913878 |
| pcaec425.citruline              | -0.01345518  | 0.009477213 | 0.157954838 |
| pcaec425.pcaec423               | 0.025221253  | 0.017768533 | 0.158043953 |
| pcaec300.c16                    | 0.069822245  | 0.049191828 | 0.158057502 |
| pcaac323.transhydroxyproline    | 0.043559348  | 0.030691471 | 0.158092842 |
| pcaac365.asymmetricdimethylar;  | 0.035800616  | 0.025228858 | 0.158160126 |
| smc181.smohc221                 | 0.025796651  | 0.018179941 | 0.158181072 |
| pcaac281.lysopcac182            | -0.031237585 | 0.022017986 | 0.158248609 |
| h1.pcaec404                     | 0.046121763  | 0.032513959 | 0.158309301 |
| pcaac420.lysopcac180            | -0.076190308 | 0.053718798 | 0.158368857 |
| pcaec445.pcaec322               | 0.107444311  | 0.075759755 | 0.158396041 |
| lysopcac160.lysopcac170         | 0.036518595  | 0.025751188 | 0.158422753 |
| pcaec363.pcaec443               | -0.049527665 | 0.034926077 | 0.158440586 |
| pcaac322.pcaec423               | -0.007542452 | 0.005319958 | 0.158529764 |
| pcaec382.pcaec365               | 0.030005519  | 0.021166659 | 0.158582589 |
| pcaac364.creatinine             | 0.015213395  | 0.010733122 | 0.158629016 |
| pcaec444.pcaec340               | 0.051511568  | 0.03634382  | 0.15865363  |
| glycine.citruline               | -0.0186918   | 0.013189606 | 0.15870588  |
| pcaec403.arginine               | -0.178825271 | 0.126201397 | 0.158757852 |
| pcaac406.lysopcac182            | -0.015501481 | 0.010941994 | 0.158841668 |
| pcaac404.c181                   | -0.011109805 | 0.007842572 | 0.158869136 |
| pcaac366.pcaec300               | 0.027484146  | 0.019404287 | 0.158929457 |
| pcaac281.pcaac384               | 0.131122871  | 0.092590194 | 0.158997187 |
| pcaec380.serotonin              | -0.169169975 | 0.119457189 | 0.158999532 |
| alphaaminoadipicacid.c10        | 0.043226598  | 0.030527657 | 0.159050419 |
| pcaec343.pcaec363               | -0.020461474 | 0.014451214 | 0.159074236 |
| pcaac426.alphaaminoadipicacid   | 0.025774337  | 0.01821006  | 0.159223369 |
| pcaac364.pcaec444               | 0.129234804  | 0.091322888 | 0.159296082 |
| pcaec343.lysopcac280            | -0.013012696 | 0.009195924 | 0.159322728 |
| c0.pcaac344                     | -0.107948264 | 0.076295875 | 0.159377372 |
| methionine.pcaec383             | -0.09878453  | 0.069820846 | 0.159387642 |
| pcaac342.asparticacid           | 0.050166723  | 0.035458125 | 0.159391325 |
| asparagine.pcaac405             | -0.186052097 | 0.131585325 | 0.159651623 |
| pcaec363.pcaec360               | 0.065078202  | 0.046029809 | 0.159680959 |
| alphaaminoadipicacid.pcaec360   | -0.009898411 | 0.007002162 | 0.159741133 |
| pcaac321.c8                     | -0.065550983 | 0.046373207 | 0.159761402 |
| alphaaminoadipicacid.lysopcac1; | 0.03457878   | 0.024469405 | 0.159881514 |
| c51dc.pcaac405                  | 0.124313866  | 0.087980137 | 0.159930522 |
| asparticacid.pcaec300           | 0.023489206  | 0.016625948 | 0.159981157 |
| lysopcac170.pcaec362            | 0.040129273  | 0.028409545 | 0.160062248 |

|                                |              |             |             |
|--------------------------------|--------------|-------------|-------------|
| pcaac342.pcaec382              | 0.018915989  | 0.013393098 | 0.16010907  |
| c51.pcaac341                   | 0.004538943  | 0.003214086 | 0.160157527 |
| c12.c181                       | -0.033341211 | 0.023611507 | 0.16019537  |
| pcaec361.pcaac405              | -0.060201362 | 0.042636297 | 0.160224823 |
| smohc221.valine                | -0.055227778 | 0.039114409 | 0.160230592 |
| pcaac420.serotonin             | -0.188259727 | 0.133345035 | 0.160269031 |
| lysopcac140.pcaac366           | 0.037588224  | 0.026624342 | 0.160276354 |
| pcaac424.pcaac361              | 0.07173004   | 0.050811887 | 0.160311871 |
| lysopcac180.c141oh             | -0.12807505  | 0.090729929 | 0.160332695 |
| c12.c2                         | 0.077890612  | 0.055191146 | 0.160426622 |
| alphaaminoadipicacid.c2        | 0.088838156  | 0.062949162 | 0.160432472 |
| c5.pcaec403                    | -0.182114206 | 0.129053839 | 0.160467544 |
| pcaec423.pcaac426              | -0.133792642 | 0.094821006 | 0.160510787 |
| citruline.creatinine           | -0.014102347 | 0.009994897 | 0.160524735 |
| ornithine.pcaac422             | -0.037719605 | 0.026735361 | 0.16055533  |
| pcaec301.alphaaminoadipicacid  | -0.007227025 | 0.005123073 | 0.160605097 |
| lysopcac281.alphaaminoadipicac | -0.004330917 | 0.003070152 | 0.160613735 |
| pcaec364.smohc222              | -0.009155477 | 0.006490807 | 0.160649849 |
| pcaac366.pcaac320              | 0.128051502  | 0.090788055 | 0.160675006 |
| prolinr.pcaac341               | 0.013142852  | 0.009319748 | 0.160742461 |
| pcaec385.kynurenine            | -0.013127808 | 0.009310084 | 0.160787282 |
| c16.c51                        | 0.081536595  | 0.057824835 | 0.1607877   |
| phenylalanine.smohc241         | 0.106716272  | 0.075703911 | 0.16090812  |
| pcaac402.alanine               | -0.040533194 | 0.028760346 | 0.160999638 |
| pcaec382.lysopcac280           | -0.015576842 | 0.011055908 | 0.16112576  |
| c102.ornithine                 | -0.031596378 | 0.022432141 | 0.161239175 |
| lysopcac182.smohc222           | 0.006030989  | 0.00428179  | 0.161242399 |
| pcaec381.pcaec423              | -0.026348526 | 0.018709682 | 0.16131258  |
| alanine.taurine                | -0.070890894 | 0.050347469 | 0.16138647  |
| pcaac300.smohc241              | 0.074898168  | 0.053194241 | 0.161392438 |
| pcaec405.lysopcac280           | -0.029415553 | 0.020891889 | 0.1613994   |
| prolinr.lysopcac280            | -0.013657688 | 0.009700904 | 0.16143228  |
| pcaac342.putrescine            | -0.039930524 | 0.028365576 | 0.161481724 |
| pcaac426.pcaec300              | -0.033647942 | 0.023902863 | 0.16148635  |
| pcaec420.pcaac402              | 0.062440242  | 0.044365133 | 0.161568574 |
| lysopcac180.lysopcac204        | 0.046599918  | 0.033114182 | 0.161618106 |
| smohc241.pcaac365              | 0.097876114  | 0.069563809 | 0.161692653 |
| pcaac386.c102                  | 0.059871043  | 0.042552451 | 0.161693729 |
| smc261.pcaec300                | -0.019647893 | 0.01396723  | 0.161776727 |
| pcaec403.c101                  | 0.032554535  | 0.023144311 | 0.161813616 |
| pcaac300.asparagine            | 0.009540038  | 0.006782394 | 0.161813749 |
| pcaac420.pcaec342              | 0.174690253  | 0.124195284 | 0.161817125 |
| pcaac401.c142                  | 0.051371576  | 0.036525121 | 0.161848145 |

|                                |              |             |             |
|--------------------------------|--------------|-------------|-------------|
| c182.c181                      | -0.022413808 | 0.015939077 | 0.161923675 |
| c10.c3                         | 0.077159007  | 0.054872705 | 0.161945    |
| pcaac422.pcaac382              | -0.02445168  | 0.017389672 | 0.161957427 |
| lysopcac160.pcaac323           | -0.157804348 | 0.112260164 | 0.162076426 |
| glutamicacid.pcaac382          | -0.02525232  | 0.017964471 | 0.162082598 |
| pcaac323.leucine               | -0.014478276 | 0.01030018  | 0.162096845 |
| pcaac323.pcaac402              | -0.044703768 | 0.031804541 | 0.162113183 |
| pcaac422.c101                  | -0.06205246  | 0.044147707 | 0.162117159 |
| pcaac366.pcaac342              | 0.154455978  | 0.109909669 | 0.162195898 |
| pcaac364.pcaac380              | 0.079536562  | 0.056607874 | 0.162271597 |
| pcaac380.pcaac340              | -0.098046745 | 0.069787344 | 0.162303725 |
| pcaac422.lysopcac170           | 0.018492032  | 0.013163501 | 0.162345276 |
| leucine.smc202                 | 0.084823229  | 0.060383411 | 0.162360721 |
| glycine.pcaac402               | -0.080407907 | 0.057243429 | 0.162383807 |
| pcaac384.lysopcac204           | -0.054069412 | 0.03850436  | 0.162509996 |
| pcaac360.c5                    | 0.017223559  | 0.012265607 | 0.162517575 |
| c16.creatinine                 | 0.019092274  | 0.013600708 | 0.162649882 |
| kynurenine.pcaac301            | -0.101306769 | 0.072171481 | 0.162672268 |
| lysopcac180.pcaac362           | 0.049512547  | 0.035274674 | 0.162692059 |
| pcaac404.c101                  | 0.032724352  | 0.023314888 | 0.162706022 |
| pcaac405.smc160                | -0.14104749  | 0.10049386  | 0.162717453 |
| lysopcac161.pcaac300           | 0.042786655  | 0.03048519  | 0.162723611 |
| smc202.pcaac421                | 0.002533579  | 0.001805261 | 0.162747584 |
| smc240.pcaac363                | -0.014565437 | 0.010379021 | 0.162773887 |
| prolinr.c141                   | -0.081789969 | 0.058288228 | 0.162819957 |
| pcaac383.kynurenine            | -0.012916939 | 0.009205831 | 0.162841666 |
| lysopcac181.pcaac340           | 0.068580784  | 0.048897324 | 0.163014031 |
| pcaac323.prolinr               | 0.012469751  | 0.008890828 | 0.163015772 |
| pcaac383.lysopcac170           | -0.05103354  | 0.036389813 | 0.163053929 |
| pcaac322.pcaac366              | 0.083135479  | 0.059290549 | 0.163126015 |
| pcaac406.pcaac361              | -0.01660604  | 0.01184467  | 0.163181633 |
| smc161.smc181                  | -0.034509917 | 0.024620562 | 0.163275128 |
| lysopcac204.alphaaminoadipicac | 0.006201813  | 0.004424604 | 0.163276811 |
| lysopcac140.asparticacid       | -0.074977962 | 0.053495614 | 0.163304479 |
| c181.pcaac362                  | 0.031627716  | 0.022565899 | 0.163304745 |
| lysopcac204.c101               | -0.034053859 | 0.02430482  | 0.163440706 |
| smohc161.c51                   | 0.049114534  | 0.03505462  | 0.163449531 |
| lysopcac181.c16                | 0.098969443  | 0.070640859 | 0.163468407 |
| pcaac403.pcaac401              | 0.116906455  | 0.083457001 | 0.163535266 |
| c18.pcaac322                   | -0.092736574 | 0.066224471 | 0.163673144 |
| pcaac422.alphaaminoadipicacid  | -0.0216947   | 0.015492943 | 0.163685488 |
| creatinine.smohc222            | 0.005913229  | 0.004223544 | 0.163754899 |
| pcaac420.pcaac405              | -0.081529338 | 0.058239401 | 0.163803705 |

|                               |              |             |             |
|-------------------------------|--------------|-------------|-------------|
| isoleucine.pcaec340           | -0.054940185 | 0.039247919 | 0.163826385 |
| c162.c18                      | -0.0814951   | 0.058220342 | 0.163842503 |
| pcaec402.pcaec406             | 0.028337009  | 0.020245172 | 0.163865841 |
| lysopcac182.putrescine        | -0.090943146 | 0.064980487 | 0.163909705 |
| lysopcac281.pcaec362          | 0.021943916  | 0.01568548  | 0.164074247 |
| c51dc.phenylalanine           | 0.095832323  | 0.068505718 | 0.164104239 |
| smc202.pcaec406               | 0.025195393  | 0.018011406 | 0.164115508 |
| pcaac420.pcaec361             | -0.034354636 | 0.024561208 | 0.164152037 |
| acetylmithoine.pcaac401       | -0.029436903 | 0.021045427 | 0.164153227 |
| pcaec321.pcaec443             | -0.037444281 | 0.026772624 | 0.164191644 |
| pcaec365.smohc141             | -0.098853318 | 0.070691029 | 0.164256841 |
| pcaec384.prolinr              | 0.047042157  | 0.033640918 | 0.164264127 |
| pcaac341.smohc241             | 0.080275562  | 0.057412607 | 0.164305894 |
| pcaac343.pcaec424             | -0.03252448  | 0.023261597 | 0.164310951 |
| alphaaminoadipicacid.pcaec301 | 0.079980083  | 0.057206102 | 0.164341192 |
| c182.pcaec403                 | 0.050641887  | 0.036223716 | 0.16436301  |
| pcaac385.pcaac322             | -0.066864019 | 0.0478297   | 0.164384291 |
| methioninesulfoxide.pcaec443  | 0.173341     | 0.124026909 | 0.164489887 |
| pcaec404.lysopcac161          | 0.072803058  | 0.052091969 | 0.164496191 |
| creatinine.smc181             | 0.050755736  | 0.036317325 | 0.1645035   |
| pcaec425.pcaac406             | -0.056665213 | 0.040555248 | 0.164601747 |
| c4.spermidine                 | -0.100927726 | 0.072237073 | 0.164620203 |
| pcaac366.c182                 | -0.047906212 | 0.034291599 | 0.164664846 |
| pcaac343.pcaac385             | 0.082856228  | 0.059319704 | 0.164740069 |
| lysine.pcaec424               | -0.014399939 | 0.010310605 | 0.164788056 |
| arginine.c12                  | -0.079105037 | 0.056649628 | 0.164855088 |
| pcaec384.pcaac322             | -0.092280802 | 0.066086734 | 0.164864749 |
| pcaac281.pcaac402             | -0.070898225 | 0.050788034 | 0.164983667 |
| c51.pcaac420                  | 0.109495434  | 0.078439272 | 0.164994775 |
| pcaec405.pcaec300             | 0.022176644  | 0.015888266 | 0.165036458 |
| lysopcac180.smohc221          | -0.07107037  | 0.050925539 | 0.165100581 |
| pcaac240.pcaac426             | 0.12356144   | 0.088560757 | 0.165208146 |
| pcaec362.smohc222             | -0.014263782 | 0.010224192 | 0.165242883 |
| pcaac342.pcaac426             | 0.085836616  | 0.061536391 | 0.165305851 |
| alanine.serotonin             | 0.119137712  | 0.085411143 | 0.165311501 |
| pcaac365.c182                 | -0.04165796  | 0.029868681 | 0.165362507 |
| c16.glycine                   | 0.072622361  | 0.052073317 | 0.165388453 |
| pcaac366.c181                 | -0.026767984 | 0.019194909 | 0.165413127 |
| pcaec420.pcaac366             | -0.035308506 | 0.025320826 | 0.165440336 |
| c181.lysine                   | 0.095862195  | 0.068758119 | 0.165515851 |
| pcaac362.pcaac320             | -0.087920623 | 0.063073089 | 0.165590069 |
| pcaac240.pcaac380             | 0.093648285  | 0.067195382 | 0.165673516 |
| pcaec422.glutamicacid         | 0.090814418  | 0.06516329  | 0.165681834 |

|                                |              |             |             |
|--------------------------------|--------------|-------------|-------------|
| lysopcac182.pcaec380           | -0.061934881 | 0.044444976 | 0.165719735 |
| pcaec341.pcaec385              | -0.083694619 | 0.060072335 | 0.165806448 |
| pcaec343.pcaec362              | 0.039715055  | 0.028509284 | 0.165858869 |
| histidine.alphaaminoadipicacid | 0.037737863  | 0.027090824 | 0.165872207 |
| c101.pcaec360                  | -0.009902316 | 0.007109144 | 0.165906686 |
| smohc241.smohc161              | 0.026285302  | 0.018872907 | 0.165950534 |
| pcaec380.pcaac320              | 0.140790061  | 0.101094358 | 0.165978698 |
| pcaac383.pcaac422              | -0.045399606 | 0.032608617 | 0.166100102 |
| pcaac281.pcaec421              | 0.002093621  | 0.001503819 | 0.166116727 |
| pcaec385.pcaac364              | -0.09220749  | 0.066233507 | 0.166130366 |
| alanine.pcaac402               | -0.081997008 | 0.058905964 | 0.166178519 |
| pcaec424.pcaac406              | -0.059418476 | 0.042689128 | 0.166211952 |
| pcaac381.asparticacid          | -0.055292564 | 0.039735711 | 0.166326736 |
| asparagine.asymmetricdimethyla | 0.022445782  | 0.016133516 | 0.166404269 |
| pcaac323.taurine               | -0.036110203 | 0.025956863 | 0.166431401 |
| pcaec361.c181                  | -0.020489543 | 0.014730123 | 0.166481625 |
| pcaec381.alanine               | -0.026253898 | 0.018879017 | 0.166589703 |
| pcaac323.smc181                | -0.028210312 | 0.020286098 | 0.166594582 |
| pcaec380.alphaaminoadipicacid  | -0.004917172 | 0.003536187 | 0.166622843 |
| pcaec422.creatinine            | -0.037849222 | 0.027220052 | 0.166634682 |
| pcaac240.smohc222              | -0.012814816 | 0.009216595 | 0.166660022 |
| c51.smc161                     | 0.151390197  | 0.108882525 | 0.166662261 |
| c3.lysopcac161                 | -0.163407593 | 0.117546336 | 0.166736381 |
| pcaac404.pcaac361              | 0.125326318  | 0.090163257 | 0.166785308 |
| pcaec341.c2                    | -0.080621476 | 0.058020123 | 0.166921682 |
| pcaec386.tyrosine              | -0.092216201 | 0.066365165 | 0.166926582 |
| c4.c162                        | 0.172049964  | 0.123856108 | 0.167052618 |
| pcaec423.c101                  | -0.054398513 | 0.039162248 | 0.167069831 |
| pcaec424.serotonin             | -0.155270592 | 0.111789181 | 0.167098934 |
| glycine.c12                    | 0.068771121  | 0.049513652 | 0.167106979 |
| c51.leucine                    | 0.061588799  | 0.044342838 | 0.167109789 |
| pcaac381.pcaec322              | -0.111052679 | 0.07997492  | 0.167209793 |
| c142.smohc221                  | -0.109211188 | 0.078661039 | 0.167275592 |
| pcaac300.c2                    | -0.088824655 | 0.063987074 | 0.167339845 |
| c8.c141oh                      | 0.202700949  | 0.146049705 | 0.167423538 |
| pcaac406.kynurenine            | -0.009360679 | 0.006745443 | 0.167480046 |
| pcaac322.smc160                | 0.096444439  | 0.069507252 | 0.167528468 |
| pcaac360.alphaaminoadipicacid  | -0.008790745 | 0.006337894 | 0.167690104 |
| pcaec322.prolinr               | 0.021288874  | 0.015349098 | 0.167700687 |
| c4.pcaec342                    | -0.075422563 | 0.054381286 | 0.167718192 |
| lysopcac182.lysopcac170        | -0.041226113 | 0.029739521 | 0.167925615 |
| pcaec421.pcaac385              | -0.056164186 | 0.040529997 | 0.168076853 |
| pcaac281.pcaec380              | -0.060577645 | 0.043718058 | 0.168107375 |

|                               |              |             |             |
|-------------------------------|--------------|-------------|-------------|
| pcaec445.c12                  | 0.059146838  | 0.042687717 | 0.168129665 |
| pcaec364.pcaec444             | 0.147985177  | 0.106823456 | 0.168204586 |
| c101.pcaac320                 | -0.075863892 | 0.054764472 | 0.168219542 |
| c162.arginine                 | 0.051937555  | 0.037498413 | 0.168285311 |
| pcaac383.pcaec365             | 0.043563896  | 0.031453257 | 0.168292638 |
| pcaec425.tyrosine             | -0.076565705 | 0.05529001  | 0.168364136 |
| lysopcac203.valine            | -0.085421576 | 0.061688962 | 0.168390902 |
| phenylalanine.pcaac402        | -0.054154882 | 0.039118206 | 0.16848963  |
| pcaac385.lysopcac161          | -0.106242663 | 0.076755726 | 0.168558288 |
| asparticacid.pcaac344         | 0.102742797  | 0.074236202 | 0.168609425 |
| smohc161.c162                 | 0.156805167  | 0.113321004 | 0.168692866 |
| pcaec422.lysopcac203          | 0.082432328  | 0.059582689 | 0.168763468 |
| pcaec404.arginine             | -0.151436495 | 0.109462432 | 0.168775164 |
| pcaac406.pcaac401             | 0.024242978  | 0.017524119 | 0.168790438 |
| c5.kynurenine                 | -0.018431592 | 0.013323519 | 0.168796155 |
| c182.c14                      | -0.037255374 | 0.026933037 | 0.168835414 |
| pcaec420.c2                   | 0.067628176  | 0.048891276 | 0.16884253  |
| pcaac380.serotonin            | -0.174453166 | 0.126122409 | 0.168851982 |
| pcaec444.pcaac426             | -0.115642945 | 0.083605745 | 0.168855466 |
| smc202.c162                   | 0.189212295  | 0.136795653 | 0.168861278 |
| citruiline.pcaec322           | 0.083826795  | 0.060612053 | 0.1689131   |
| lysopcac170.c142              | -0.052895745 | 0.038250034 | 0.168947152 |
| pcaec342.c142                 | 0.058141483  | 0.042043908 | 0.168952891 |
| c141oh.alphaaminoadipicacid   | 0.004996198  | 0.0036148   | 0.169174822 |
| c0.pcaac320                   | -0.076941846 | 0.05567768  | 0.169246827 |
| c141oh.c2                     | 0.12418385   | 0.089864941 | 0.169253308 |
| pcaec362.c101                 | -0.027896443 | 0.020187303 | 0.169257512 |
| pcaac320.asparagine           | 0.008615946  | 0.00623624  | 0.169345623 |
| pcaac323.pcaac381             | 0.046597785  | 0.033729637 | 0.169371516 |
| smc181.smohc241               | 0.134894441  | 0.097649677 | 0.169401134 |
| pcaac281.c101                 | -0.014700278 | 0.010641982 | 0.169420849 |
| glycine.pcaac364              | 0.08656888   | 0.062678032 | 0.169476043 |
| pcaac401.pcaac381             | 0.137669572  | 0.099677534 | 0.169481671 |
| lysopcac281.lysopcac182       | -0.022195611 | 0.016071606 | 0.169513699 |
| pcaac321.asparticacid         | -0.058402814 | 0.042293269 | 0.169557924 |
| lysopcac140.kynurenine        | -0.019882347 | 0.014402243 | 0.169679907 |
| pcaac321.c142                 | 0.043957829  | 0.031846476 | 0.169741053 |
| pcaec401.pcaac366             | -0.049934    | 0.036181834 | 0.169808479 |
| prolinr.pcaec423              | -0.016672744 | 0.012081321 | 0.169821298 |
| pcaec445.alphaaminoadipicacid | 0.007104659  | 0.005149453 | 0.169929174 |
| serine.asparagine             | 0.016703283  | 0.012107233 | 0.169953821 |
| c10.c141oh                    | 0.211476018  | 0.153304723 | 0.170003943 |
| c51dc.c14                     | -0.041353315 | 0.029979255 | 0.170019654 |

|                           |              |             |             |
|---------------------------|--------------|-------------|-------------|
| smohc141.pcaac361         | 0.087230537  | 0.063240707 | 0.170036912 |
| pcaec380.citruline        | -0.025506893 | 0.018492379 | 0.1700438   |
| pcaec300.pcaec405         | 0.09688639   | 0.070252063 | 0.170103465 |
| pcaec365.glycine          | 0.048050021  | 0.034846364 | 0.170169479 |
| pcaac386.smohc241         | 0.092845719  | 0.067338229 | 0.170204573 |
| h1.c182                   | -0.051059283 | 0.037036391 | 0.17025747  |
| pcaec406.prolinr          | 0.039272673  | 0.028487807 | 0.170271754 |
| smc260.pcaec382           | 0.025425427  | 0.01844419  | 0.170294004 |
| pcaec363.prolinr          | 0.028486295  | 0.020672338 | 0.170452619 |
| pcaec301.pcaec423         | -0.00794944  | 0.005769291 | 0.170484168 |
| pcaec363.pcaec362         | 0.032429365  | 0.023539916 | 0.170562933 |
| acetylmithoine.kynurenine | -0.037910257 | 0.027519892 | 0.170585946 |
| pcaac404.pcaac380         | 0.069010131  | 0.050102041 | 0.170637342 |
| leucine.prolinr           | -0.072598035 | 0.052708607 | 0.17065114  |
| pcaac406.histidine        | -0.068336634 | 0.049627357 | 0.170759594 |
| pcaac404.valine           | -0.071980029 | 0.052276947 | 0.170789563 |
| pcaac300.c181             | -0.012605696 | 0.009157541 | 0.170900916 |
| creatinine.pcaec340       | 0.093384517  | 0.067840532 | 0.170903206 |
| smc241.pcaec382           | 0.015281161  | 0.011101227 | 0.170903444 |
| c16.pcaec421              | 0.004475588  | 0.003251366 | 0.17090463  |
| pcaac364.smc240           | -0.041301419 | 0.030007038 | 0.170946053 |
| c162.pcaec362             | 0.016392981  | 0.011911114 | 0.170981562 |
| citruline.pcaac402        | 0.050897902  | 0.036985923 | 0.171022801 |
| pcaec422.pcaec343         | 0.125601446  | 0.091279427 | 0.171063596 |
| lysine.kynurenine         | -0.008308598 | 0.006038275 | 0.171070327 |
| c2.alanine                | 0.079263721  | 0.057606533 | 0.171082214 |
| pcaec424.arginine         | -0.096028487 | 0.069793729 | 0.171100843 |
| c162.pcaac405             | -0.072468001 | 0.052696702 | 0.171317053 |
| c0.pcaec424               | -0.014886419 | 0.010825522 | 0.171338042 |
| pcaec380.pcaec404         | -0.039650115 | 0.028834821 | 0.171351966 |
| pcaac403.pcaec406         | 0.034222795  | 0.024888445 | 0.171361251 |
| pcaec405.pcaec404         | -0.04951143  | 0.036026022 | 0.171585132 |
| lysopcac161.pcaec360      | -0.005446042 | 0.003963448 | 0.171664766 |
| pcaec384.asparagine       | 0.019735932  | 0.014365879 | 0.171745598 |
| pcaac403.pcaec402         | -0.18973192  | 0.138111611 | 0.171760502 |
| pcaec403.c182             | -0.077929153 | 0.056728661 | 0.171773037 |
| serine.pcaac361           | 0.094282539  | 0.068633431 | 0.171774867 |
| smc241.prolinr            | -0.058991609 | 0.042945812 | 0.171800484 |
| pcaac344.c8               | -0.050652497 | 0.036878609 | 0.171842726 |
| pcaac404.c14              | 0.042612842  | 0.031030127 | 0.171910746 |
| c14.pcaac406              | 0.078486179  | 0.05716459  | 0.171999835 |
| pcaec424.pcaec404         | -0.04513271  | 0.032873061 | 0.172014374 |
| alanine.pcaec340          | 0.094031367  | 0.068501045 | 0.172088632 |



|                                |              |             |             |
|--------------------------------|--------------|-------------|-------------|
| pcaec402.pcaac341              | 0.009834251  | 0.0071648   | 0.172126265 |
| pcaac426.putrescine            | -0.042459216 | 0.03093921  | 0.172199286 |
| pcaec385.pcaac364              | 0.047307403  | 0.034472829 | 0.172209652 |
| pcaec446.pcaac381              | 0.034132054  | 0.024872847 | 0.172224623 |
| pcaac426.smc181                | -0.023881128 | 0.01740542  | 0.172289976 |
| smc240.valine                  | -0.041125723 | 0.029980661 | 0.172386127 |
| smc160.c162                    | 0.129737505  | 0.094589016 | 0.172432744 |
| pcaec340.pcaac300              | -0.049540623 | 0.036123145 | 0.172480768 |
| h1.pcaac341                    | -0.027278643 | 0.01989348  | 0.172543509 |
| smc261.pcaac365                | 0.051714975  | 0.037716974 | 0.172575431 |
| pcaac384.pcaac420              | -0.090915481 | 0.066316564 | 0.172637936 |
| pcaec383.lysopcac161           | 0.094433453  | 0.068883145 | 0.172640799 |
| pcaec383.c101                  | 0.033424751  | 0.024382502 | 0.172663386 |
| serotonin.glutamine            | 0.020723789  | 0.015124886 | 0.172872431 |
| pcaac386.lysopcac170           | 0.017584923  | 0.012834229 | 0.172878711 |
| lysopcac181.asparticacid       | 0.028851951  | 0.021058038 | 0.172891868 |
| pcaec380.c182                  | -0.0525763   | 0.038383931 | 0.173006541 |
| pcaac365.c181                  | -0.023184547 | 0.016932322 | 0.17316228  |
| pcaac281.pcaac420              | -0.101342301 | 0.074023035 | 0.173219528 |
| pcaac425.pcaac422              | -0.049098799 | 0.035866122 | 0.173256318 |
| serine.c182                    | -0.056534834 | 0.041299752 | 0.173273792 |
| pcaac426.creatinine            | -0.030421442 | 0.022225068 | 0.173305238 |
| pcaec386.pcaac362              | -0.040843473 | 0.029840121 | 0.173319599 |
| c18.pcaec301                   | -0.03921951  | 0.028654612 | 0.173333807 |
| pcaac380.asymmetricdimethylar; | 0.038217329  | 0.027927428 | 0.173410747 |
| pcaac406.pcaac362              | -0.074888795 | 0.05472767  | 0.173429937 |
| pcaac300.smohc161              | -0.037885467 | 0.027691135 | 0.173506644 |
| serine.histidine               | 0.098819211  | 0.072233686 | 0.173536444 |
| putrescine.pcaec361            | 0.016701952  | 0.012209791 | 0.173578367 |
| arginine.pcaec300              | 0.029543362  | 0.021598741 | 0.173605433 |
| pcaac366.pcaac421              | -0.133013019 | 0.097248014 | 0.173623207 |
| c141oh.pcaec401                | -0.085054842 | 0.062192768 | 0.173676586 |
| pcaec363.pcaac405              | -0.062128326 | 0.045430323 | 0.173691669 |
| phenylalanine.c101             | 0.019605036  | 0.014335932 | 0.17369373  |
| pcaac405.creatinine            | -0.062319552 | 0.045570845 | 0.173698156 |
| lysopcac204.pcaec404           | 0.019906602  | 0.014556981 | 0.173709386 |
| pcaec361.pcaec401              | 0.189581532  | 0.138644767 | 0.173742136 |
| pcaac380.c181                  | -0.019454161 | 0.01423058  | 0.17384316  |
| pcaac300.lysopcac280           | 0.012757789  | 0.009333326 | 0.173893304 |
| pcaec360.pcaac385              | -0.074773564 | 0.054727509 | 0.17408684  |
| lysopcac180.pcaec421           | -0.012366409 | 0.009051492 | 0.174105502 |
| pcaec361.alanine               | -0.022207483 | 0.016258265 | 0.174202329 |
| lysopcac170.pcaac420           | -0.138611612 | 0.101488099 | 0.174242365 |

|                                 |              |             |             |
|---------------------------------|--------------|-------------|-------------|
| pcaac320.c8                     | -0.075286068 | 0.055130221 | 0.174301094 |
| pcaac322.pcaac401               | 0.042038307  | 0.030784979 | 0.174319342 |
| pcaec421.alphaaminoadipicacid   | -0.008909912 | 0.006525027 | 0.17433441  |
| smc181.lysopcac181              | 0.071291459  | 0.052210918 | 0.174349087 |
| pcaec420.c182                   | -0.036249333 | 0.026551289 | 0.174409952 |
| lysopcac281.smc181              | -0.014834352 | 0.010868446 | 0.174521587 |
| glutamine.lysopcac280           | 0.008602656  | 0.006304192 | 0.17461815  |
| pcaec300.smc240                 | -0.052330608 | 0.038360474 | 0.174747666 |
| asparticacid.asymmetricdimethyl | -0.032341869 | 0.02370925  | 0.174771841 |
| c12.pcaec404                    | 0.031522707  | 0.023109655 | 0.174788849 |
| pcaec381.pcaec342               | 0.127126707  | 0.09320849  | 0.1748369   |
| lysopcac204.pcaec406            | -0.113786415 | 0.083427981 | 0.17483951  |
| pcaec343.pcaec340               | -0.108220124 | 0.079359611 | 0.174908734 |
| pcaac381.smohc161               | 0.055244179  | 0.040513241 | 0.174927436 |
| c0.c12                          | -0.048883966 | 0.035853865 | 0.174985727 |
| methioninesulfoxide.pcaac281    | -0.006235488 | 0.00457401  | 0.175042029 |
| pcaac366.pcaec380               | -0.171061204 | 0.125524481 | 0.175190339 |
| lysopcac180.pcaac402            | 0.100223356  | 0.0735491   | 0.175221441 |
| pcaec422.c5                     | 0.030867665  | 0.02265429  | 0.175259203 |
| pcaac322.pcaac281               | -0.006325442 | 0.004643165 | 0.175334728 |
| methionine.smohc221             | -0.041265555 | 0.030291787 | 0.175348576 |
| prolinr.c14                     | 0.052448506  | 0.038502312 | 0.175364837 |
| asymmetricdimethylarginine.c10  | 0.011454518  | 0.008409725 | 0.175415476 |
| c182.lysopcac180                | -0.056125236 | 0.041210103 | 0.175455519 |
| pcaac380.c142                   | 0.08722786   | 0.064048335 | 0.175462532 |
| smc261.pcaec404                 | 0.025659057  | 0.018844255 | 0.175547133 |
| pcaec321.pcaac381               | 0.03247251   | 0.02384889  | 0.175560984 |
| pcaec443.alanine                | -0.02602019  | 0.019114226 | 0.175653764 |
| pcaac385.smohc221               | 0.024735872  | 0.018174911 | 0.175751381 |
| h1.spermidine                   | 0.091965238  | 0.067577331 | 0.175783279 |
| c5.lysine                       | -0.220808434 | 0.162267457 | 0.175821259 |
| c101.c142                       | 0.109467538  | 0.080459528 | 0.175896717 |
| pcaec422.pcaac365               | -0.117314057 | 0.086229078 | 0.17590814  |
| pcaac362.smc181                 | -0.040647671 | 0.029878238 | 0.175923585 |
| pcaec380.pcaec300               | 0.025553987  | 0.018786007 | 0.175979419 |
| pcaec362.pcaac362               | -0.021877278 | 0.016084377 | 0.176014161 |
| smohc161.c14                    | -0.056240094 | 0.041351848 | 0.17605167  |
| pcaec362.c51                    | 0.113504077  | 0.083457957 | 0.176058985 |
| asymmetricdimethylarginine.pca  | 0.006015685  | 0.004423675 | 0.176100375 |
| c4.pcaac362                     | -0.020967338 | 0.015418717 | 0.176107082 |
| pcaec383.pcaec361               | 0.020021614  | 0.014724343 | 0.176138629 |
| pcaac240.pcaec382               | 0.026707334  | 0.019642471 | 0.176167039 |
| c181.alphaaminoadipicacid       | 0.005002098  | 0.003678966 | 0.176174974 |

|                              |              |             |             |
|------------------------------|--------------|-------------|-------------|
| c0.lysopcac204               | 0.060247283  | 0.044311981 | 0.176184967 |
| pcaec421.pcaac403            | -0.062951896 | 0.046304529 | 0.176215581 |
| pcaac381.pcaac380            | -0.134494353 | 0.098929376 | 0.176222068 |
| pcaec364.pcaac361            | 0.162611299  | 0.119625096 | 0.176271877 |
| pcaac365.c162                | -0.113878697 | 0.083793931 | 0.176369305 |
| pcaec444.pcaac341            | 0.006342702  | 0.00466729  | 0.176389554 |
| h1.pcaec421                  | -0.015965417 | 0.011750315 | 0.176467393 |
| c101.pcaec403                | 0.031558913  | 0.023226951 | 0.176468328 |
| c12.creatinine               | 0.049478351  | 0.036418212 | 0.176501209 |
| creatinine.pcaec423          | 0.013474543  | 0.009919201 | 0.176559812 |
| leucine.alphaaminoadipicacid | -0.006096708 | 0.004488118 | 0.176565927 |
| pcaac406.pcaac420            | -0.074131239 | 0.054577964 | 0.17661271  |
| pcaec381.asparagine          | 0.022736677  | 0.016740337 | 0.176633613 |
| lysopcac182.lysopcac280      | 0.01482439   | 0.010919163 | 0.176807171 |
| smohc141.phenylalanine       | 0.078158263  | 0.057573001 | 0.176838312 |
| c141.pcaec404                | 0.03057503   | 0.022525336 | 0.176898148 |
| pcaec300.lysopcac280         | 0.013531019  | 0.009969818 | 0.176949972 |
| glutamine.lysopcac204        | -0.02877242  | 0.021200262 | 0.176957997 |
| c51.pcaac405                 | -0.058179144 | 0.04286837  | 0.176962761 |
| pcaac361.pcaac300            | 0.029320429  | 0.02160433  | 0.176963594 |
| alanine.pcaac403             | -0.015316858 | 0.011286195 | 0.176970927 |
| pcaac363.pcaac444            | 0.131208667  | 0.096681018 | 0.176971722 |
| pcaac300.leucine             | -0.011298274 | 0.008327699 | 0.177104636 |
| pcaec420.putrescine          | -0.04783565  | 0.035261135 | 0.177136074 |
| c0.lysopcac203               | 0.024218755  | 0.017854469 | 0.177186129 |
| pcaac240.pcaec404            | -0.13625557  | 0.100450264 | 0.177187798 |
| methionine.pcaec423          | -0.017294606 | 0.012754182 | 0.177331625 |
| c102.c182                    | -0.1463795   | 0.107968801 | 0.17740701  |
| smc180.pcaec362              | 0.055782024  | 0.04114589  | 0.177421062 |
| c16.alphaaminoadipicacid     | 0.014241688  | 0.010505808 | 0.177456552 |
| pcaec425.asparticacid        | 0.048605239  | 0.035859101 | 0.177504455 |
| c101.glutamine               | -0.01797959  | 0.013266755 | 0.177572501 |
| smc240.pcaac380              | 0.120300409  | 0.088784606 | 0.177657403 |
| pcaac342.lysopcac280         | 0.021106282  | 0.015577198 | 0.177664372 |
| pcaac321.smohc161            | -0.031962801 | 0.023593459 | 0.177733003 |
| pcaec446.pcaec322            | 0.113680922  | 0.083917829 | 0.177752697 |
| pcaec343.threonine           | -0.089337169 | 0.065966407 | 0.177875694 |
| citruline.pcaec403           | -0.053876019 | 0.039783974 | 0.177897546 |
| c142.lysine                  | 0.091360523  | 0.067464645 | 0.177902505 |
| kynurenine.prolinr           | 0.026350095  | 0.019459576 | 0.177935773 |
| pcaac421.asparagine          | -0.015418148 | 0.011389017 | 0.178037832 |
| smc180.pcaac366              | 0.093137085  | 0.06881163  | 0.178122355 |
| pcaac381.pcaac420            | -0.183619302 | 0.1356636   | 0.178128113 |

|                                |              |             |             |
|--------------------------------|--------------|-------------|-------------|
| c142.phenylalanine             | 0.048932963  | 0.036153455 | 0.178131386 |
| c16.pcaec383                   | 0.117875001  | 0.087110931 | 0.178233282 |
| pcaac366.pcaec423              | -0.009876314 | 0.007298855 | 0.178242108 |
| pcaec360.pcaac380              | 0.051252635  | 0.037877738 | 0.178250056 |
| pcaec425.pcaac405              | -0.091760555 | 0.067815326 | 0.178254008 |
| methioninesulfoxide.smohc241   | 0.117005369  | 0.086474199 | 0.178262873 |
| lysopcac180.smc240             | -0.087041125 | 0.064335631 | 0.17830886  |
| pcaac365.glutamicacid          | 0.071435368  | 0.052802857 | 0.178325804 |
| pcaac322.kynurenine            | -0.018368978 | 0.013580796 | 0.178421229 |
| methioninesulfoxide.kynurenine | -0.02992805  | 0.022132315 | 0.17852869  |
| methionine.c5                  | -0.034899564 | 0.025816464 | 0.178656184 |
| pcaec361.c51                   | 0.101113711  | 0.074799037 | 0.178665331 |
| lysopcac204.c141oh             | -0.19947687  | 0.147564899 | 0.178669866 |
| pcaec340.pcaac426              | 0.110340389  | 0.081628188 | 0.178684897 |
| lysopcac160.lysopcac182        | 0.063094252  | 0.046677526 | 0.178697201 |
| smc181.pcaac405                | -0.116711017 | 0.086345156 | 0.178705245 |
| ornithine.lysopcac280          | -0.03494879  | 0.025856814 | 0.178721889 |
| pcaec445.pcaac341              | 0.006756255  | 0.004998816 | 0.178740022 |
| pcaac323.smohc222              | -0.012240487 | 0.009058354 | 0.178828916 |
| methioninesulfoxide.pcaac426   | 0.215776877  | 0.15968534  | 0.178838434 |
| pcaac360.pcaac341              | 0.013265618  | 0.009817589 | 0.178855536 |
| pcaec403.smohc222              | -0.021037775 | 0.015569772 | 0.178860604 |
| glutamine.alanine              | 0.056517791  | 0.041828851 | 0.178868858 |
| pcaec420.pcaac365              | 0.058505886  | 0.043302283 | 0.178889215 |
| c3.lysopcac203                 | 0.047093793  | 0.034856667 | 0.178900101 |
| smohc221.pcaac320              | 0.181370422  | 0.13425588  | 0.178944503 |
| pcaec361.pcaac422              | -0.041828683 | 0.030964076 | 0.178961482 |
| c18.pcaac366                   | 0.07767815   | 0.057505696 | 0.178989382 |
| c102.asymmetricdimethylarginin | -0.015733242 | 0.011648637 | 0.179034001 |
| c142.lysopcac170               | -0.023459937 | 0.017371351 | 0.179083614 |
| pcaec365.tyrosine              | -0.086668836 | 0.064176095 | 0.179087148 |
| pcaec445.c14                   | -0.063015259 | 0.046680736 | 0.179267808 |
| smohc221.asparticacid          | 0.042876182  | 0.031767131 | 0.179337367 |
| pcaac320.pcaac380              | 0.123985929  | 0.091879146 | 0.17941961  |
| pcaac406.putrescine            | -0.0395235   | 0.029289829 | 0.179436415 |
| pcaec404.lysopcac280           | -0.01256086  | 0.009309704 | 0.179491203 |
| pcaec443.pcaec362              | 0.013799751  | 0.010228107 | 0.179498661 |
| pcaac240.pcaac402              | -0.104664186 | 0.077586511 | 0.179562484 |
| pcaac343.pcaec361              | -0.020746686 | 0.015381718 | 0.179630163 |
| lysopcac180.pcaac366           | 0.057994237  | 0.042998676 | 0.179644225 |
| c101.transhydroxyproline       | 0.039340896  | 0.029172054 | 0.179696497 |
| pcaac381.creatinine            | -0.02512897  | 0.018642907 | 0.179911769 |
| pcaec422.smohc222              | -0.011916725 | 0.008842468 | 0.179989094 |

|                             |              |             |             |
|-----------------------------|--------------|-------------|-------------|
| pcaec421.lysopcac203        | 0.158650854  | 0.117729202 | 0.180014197 |
| pcaec321.pcaac406           | -0.056565534 | 0.041987954 | 0.180144741 |
| pcaec382.pcaac381           | 0.069441001  | 0.051547704 | 0.180165195 |
| methionine.pcaac422         | -0.038976889 | 0.028940213 | 0.180266048 |
| phenylalanine.lysopcac181   | 0.060339375  | 0.044802145 | 0.180269475 |
| asparticacid.lysopcac181    | 0.131871772  | 0.09792048  | 0.180293091 |
| smc202.alphaaminoadipicacid | 0.017743822  | 0.013176105 | 0.180311206 |
| lysopcac203.pcaac426        | -0.106345574 | 0.078971713 | 0.180323435 |
| lysopcac203.smc181          | -0.015921405 | 0.011823235 | 0.180326208 |
| c16.pcaec406                | -0.011926189 | 0.008856633 | 0.18033822  |
| lysopcac180.pcaac405        | 0.122264129  | 0.090801497 | 0.180365112 |
| pcaac424.pcaac281           | -0.007437    | 0.005523565 | 0.18039276  |
| pcaec300.c51                | 0.117863483  | 0.087539136 | 0.180394052 |
| pcaec301.pcaec365           | 0.057307506  | 0.042563804 | 0.180399978 |
| pcaac386.smc181             | 0.033474707  | 0.024866881 | 0.180475345 |
| histidine.pcaec382          | -0.038502207 | 0.028604336 | 0.18051694  |
| pcaec365.smohe221           | 0.036176732  | 0.026877221 | 0.180525693 |
| c14.pcaec365                | 0.033994355  | 0.02525658  | 0.180538369 |
| alanine.pcaac422            | -0.019168345 | 0.014247705 | 0.180730398 |
| pcaec342.tyrosine           | -0.069713415 | 0.051821768 | 0.180765883 |
| smc261.smc160               | -0.126807591 | 0.094277172 | 0.180831151 |
| pcaec424.c101               | 0.035123798  | 0.026119779 | 0.180937637 |
| pcaec445.c181               | -0.020368625 | 0.015149038 | 0.180992841 |
| ornithine.smc202            | 0.060546101  | 0.045033966 | 0.18102345  |
| c141oh.c101                 | -0.008255617 | 0.006140698 | 0.18103761  |
| pcaec301.pcaec421           | -0.004918386 | 0.003658743 | 0.181078616 |
| pcaac322.pcaac363           | 0.041289567  | 0.030716716 | 0.181103739 |
| smc260.serine               | -0.019446143 | 0.014466683 | 0.18110478  |
| pcaec381.pcaec382           | -0.046252276 | 0.034410843 | 0.181131434 |
| pcaac424.lysopcac161        | 0.088094158  | 0.065543071 | 0.181148868 |
| h1.pcaec405                 | -0.071769209 | 0.053399259 | 0.18116623  |
| pcaac406.pcaec420           | -0.100506557 | 0.07483608  | 0.18148533  |
| serotonin.pcaac424          | -0.046201992 | 0.034408454 | 0.181573058 |
| acetylmethionine.serine     | 0.078284331  | 0.058304327 | 0.181594522 |
| c141.c51                    | 0.042141464  | 0.031389564 | 0.181644198 |
| citruline.c8                | -0.067373862 | 0.050189261 | 0.181687851 |
| pcaac386.pcaac323           | 0.110430613  | 0.082275055 | 0.181747147 |
| pcaec382.lysopcac161        | 0.068256301  | 0.050854365 | 0.181753932 |
| c8.pcaec340                 | 0.062226582  | 0.046362824 | 0.18176238  |
| pcaec386.prolinr            | 0.039564361  | 0.029480395 | 0.181797566 |
| c2.pcaac361                 | -0.070931355 | 0.052856434 | 0.181828003 |
| c0.asparticacid             | 0.035233459  | 0.026258098 | 0.181876368 |
| pcaac386.c16                | 0.065787867  | 0.049035596 | 0.181934003 |

|                               |              |             |             |
|-------------------------------|--------------|-------------|-------------|
| pcaec401.phenylalanine        | 0.077293181  | 0.057617406 | 0.181980862 |
| c51dc.pcaac361                | -0.09930065  | 0.074027965 | 0.182012054 |
| pcaec406.smohc221             | 0.035399951  | 0.026396121 | 0.182105768 |
| pcaac281.c181                 | -0.020566904 | 0.015339443 | 0.182209009 |
| pcaec365.pcaec402             | 0.050937884  | 0.037994949 | 0.182253297 |
| c18.c101                      | -0.004967096 | 0.003705572 | 0.182321068 |
| pcaac342.pcaac322             | 0.119275055  | 0.089017412 | 0.182493778 |
| histidine.pcaac426            | -0.035105599 | 0.026203896 | 0.182557964 |
| lysopcac181.pcaec444          | -0.183747991 | 0.137169893 | 0.182604727 |
| lysopcac204.pcaec362          | -0.029277718 | 0.021856985 | 0.182621567 |
| pcaec321.pcaec421             | 0.003306901  | 0.002469512 | 0.182758566 |
| pcaac424.pcaec382             | -0.067686033 | 0.050546732 | 0.18276271  |
| pcaac281.c14                  | -0.044825827 | 0.033476788 | 0.182784174 |
| pcaac380.prolinr              | 0.043259019  | 0.032306698 | 0.18278462  |
| c3.pcaac344                   | -0.071900567 | 0.053704257 | 0.182845178 |
| pcaec423.pcaac341             | 0.005479774  | 0.004093546 | 0.182905871 |
| pcaec360.methionine           | -0.062966534 | 0.047044318 | 0.182966346 |
| creatinine.pcaac323           | 0.122919874  | 0.09184711  | 0.183012414 |
| pcaec383.smc240               | -0.069073864 | 0.051616513 | 0.183043989 |
| pcaec322.pcaac403             | -0.011127213 | 0.008315229 | 0.183056928 |
| spermidine.c181               | 0.108447915  | 0.08104474  | 0.183072753 |
| lysopcac280.pcaec382          | 0.012450665  | 0.009304576 | 0.183073195 |
| c18.lysine                    | 0.076612889  | 0.057258289 | 0.183105712 |
| glutamine.asparticacid        | 0.063302378  | 0.047340045 | 0.183378368 |
| c18.alphaaminoadipicacid      | 0.00626282   | 0.004683658 | 0.183384988 |
| pcaec362.c102                 | 0.055516999  | 0.041521297 | 0.183414747 |
| smc160.citruline              | -0.020085352 | 0.015022026 | 0.183418886 |
| pcaec445.glutamine            | 0.040711706  | 0.030450217 | 0.183440963 |
| smc181.kynurenine             | -0.005862018 | 0.004385636 | 0.183555605 |
| pcaec362.c14                  | -0.054433061 | 0.040733911 | 0.183663793 |
| smohc222.c142                 | 0.051033199  | 0.038191739 | 0.183687148 |
| smc241.serotonin              | -0.101663653 | 0.076097032 | 0.183772762 |
| pcaac365.pcaec301             | -0.126743063 | 0.094883026 | 0.183835272 |
| asparagine.smc202             | 0.074877286  | 0.056061448 | 0.183885314 |
| pcaac386.putrescine           | -0.043838955 | 0.032827556 | 0.183949669 |
| pcaac365.pcaec445             | 0.074778717  | 0.056000239 | 0.183983291 |
| pcaec343.pcaec424             | 0.01430191   | 0.010711344 | 0.184021472 |
| pcaac422.pcaac361             | 0.077139241  | 0.057773776 | 0.184026951 |
| lysopcac181.asymmetricdimethy | 0.032471492  | 0.024321428 | 0.184058496 |
| pcaac342.serotonin            | -0.163901778 | 0.122769725 | 0.184079362 |
| pcaec446.pcaec443             | -0.046279115 | 0.034670501 | 0.184147062 |
| lysopcac181.lysopcac170       | 0.074295646  | 0.055660116 | 0.184152748 |
| pcaec340.lysopcac161          | 0.096231727  | 0.072095218 | 0.184160212 |

|                                 |              |             |             |
|---------------------------------|--------------|-------------|-------------|
| pcaec381.pcaec404               | 0.034579966  | 0.025909212 | 0.184201833 |
| lysopcac140.pcaac385            | 0.026298209  | 0.019704913 | 0.184220601 |
| asparagine.pcaec383             | -0.034108731 | 0.025557283 | 0.184221367 |
| c51.pcaec406                    | -0.01598236  | 0.011975538 | 0.184226389 |
| pcaac422.histidine              | -0.123362746 | 0.092443314 | 0.184263894 |
| putrescine.c181                 | -0.020826321 | 0.015606544 | 0.184266596 |
| pcaec363.tyrosine               | -0.073844466 | 0.055341362 | 0.18430332  |
| pcaac363.smc181                 | -0.023825652 | 0.017856291 | 0.184319074 |
| serine.pcaac405                 | -0.078271777 | 0.058665341 | 0.184349153 |
| c4.pcaec403                     | -0.124101451 | 0.093015321 | 0.184350383 |
| pcaac383.smc240                 | -0.05531721  | 0.041461642 | 0.184359015 |
| pcaac405.pcaec382               | 0.006395845  | 0.004794236 | 0.184394376 |
| pcaec361.pcaac366               | 0.048542598  | 0.036390524 | 0.184438403 |
| pcaac406.c51                    | 0.093270363  | 0.069930054 | 0.184493536 |
| pcaac240.pcaac322               | 0.098261825  | 0.073676889 | 0.184519911 |
| pcaac384.kynurenine             | -0.008714329 | 0.006534253 | 0.18453551  |
| pcaec386.pcaac380               | 0.231277084  | 0.173469148 | 0.184663729 |
| pcaec382.pcaac405               | -0.078084594 | 0.058570501 | 0.184687779 |
| pcaec405.lysopcac180            | -0.101975646 | 0.076491921 | 0.184693322 |
| pcaec321.c18                    | 0.03670646   | 0.027536022 | 0.18473309  |
| lysopcac280.c101                | -0.023166062 | 0.017378649 | 0.184738213 |
| pcaec300.alphaaminoadipicacid   | -0.007291795 | 0.005471152 | 0.184819161 |
| pcaec364.pcaac381               | 0.058192537  | 0.043667459 | 0.184865663 |
| pcaec406.lysopcac182            | -0.025066031 | 0.018811352 | 0.184909696 |
| pcaac363.pcaec423               | -0.007821698 | 0.005870318 | 0.184935959 |
| asymmetricdimethylarginine.pca  | -0.077519921 | 0.058180633 | 0.184940524 |
| pcaac321.c2                     | -0.138778478 | 0.104175943 | 0.185021133 |
| c0.smohc222                     | -0.015113716 | 0.011345607 | 0.185032335 |
| pcaec343.pcaac406               | -0.062677678 | 0.0470526   | 0.185046665 |
| pcaac321.smohc141               | -0.039676473 | 0.029789959 | 0.185113132 |
| acetylmithoine.asparagine       | -0.014170458 | 0.0106408   | 0.185166977 |
| pcaac420.histidine              | -0.09587058  | 0.071999131 | 0.185218762 |
| pcaac342.pcaec404               | -0.021280249 | 0.015988462 | 0.185407909 |
| lysopcac180.c181                | 0.055962045  | 0.042046131 | 0.185410414 |
| pcaac363.lysopcac204            | -0.023189403 | 0.017424688 | 0.185453626 |
| c141.pcaac341                   | -0.014308102 | 0.010752139 | 0.18549128  |
| pcaec362.smc202                 | 0.096908888  | 0.072835967 | 0.185561127 |
| methioninesulfoxide.pcaec420    | 0.124055319  | 0.093239786 | 0.185564744 |
| pcaec343.smohc222               | -0.007010833 | 0.005269548 | 0.185582736 |
| smc161.pcaac360                 | 0.062142348  | 0.046712432 | 0.185624047 |
| pcaac366.pcaec382               | 0.022511168  | 0.016922841 | 0.185654664 |
| asymmetricdimethylarginine.lysc | -0.03281483  | 0.024671077 | 0.185697641 |
| c16.pcaac426                    | 0.096182623  | 0.07233188  | 0.18581357  |

|                                |              |             |             |
|--------------------------------|--------------|-------------|-------------|
| pcaac426.pcaec446              | -0.108814589 | 0.08183648  | 0.185840425 |
| pcaec443.pcaec342              | 0.129471974  | 0.097373758 | 0.185846813 |
| pcaec444.smohe241              | 0.119590419  | 0.089943219 | 0.185852733 |
| pcaac240.pcaac385              | -0.057576895 | 0.043307277 | 0.185893598 |
| prolinr.pcaec424               | -0.025865636 | 0.019456873 | 0.18593108  |
| leucine.pcaec423               | 0.02475775   | 0.018625429 | 0.185976623 |
| pcaac405.lysopcac280           | 0.006373658  | 0.004795429 | 0.186020536 |
| pcaec386.pcaec342              | 0.24377087   | 0.183428525 | 0.186067211 |
| lysopcac161.pcaec445           | 0.16932867   | 0.12741512  | 0.186072652 |
| pcaac380.c51                   | 0.079840896  | 0.060079626 | 0.186084084 |
| pcaec385.pcaec404              | -0.013031683 | 0.009808046 | 0.186164826 |
| pcaec343.pcaac381              | 0.054992824  | 0.041390949 | 0.186182319 |
| kynurenine.pcaac403            | 0.025423567  | 0.019136343 | 0.186205576 |
| c182.methionine                | -0.049579598 | 0.037321494 | 0.186239383 |
| c12.pcaac300                   | 0.088140252  | 0.066352039 | 0.186263526 |
| c141oh.lysopcac280             | 0.018467614  | 0.013903955 | 0.186311466 |
| phenylalanine.pcaec382         | -0.052505971 | 0.039531182 | 0.186315027 |
| lysopcac182.transhydroxyprolin | -0.048227498 | 0.036310398 | 0.186320234 |
| asparagine.kynurenine          | -0.014788035 | 0.011134358 | 0.186338839 |
| pcaec340.c51                   | 0.052600021  | 0.039604777 | 0.186345797 |
| pcaec321.glutamicacid          | 0.07645315   | 0.057565598 | 0.186351833 |
| creatinine.tyrosine            | 0.094943964  | 0.071492454 | 0.186377227 |
| c142.smc160                    | -0.089697079 | 0.067548563 | 0.186422536 |
| alanine.pcaec422               | -0.0325813   | 0.02453771  | 0.186450557 |
| c18.c2                         | 0.099001219  | 0.074560257 | 0.186451798 |
| pcaac422.creatinine            | -0.016618533 | 0.012515881 | 0.186453694 |
| pcaac363.pcaec342              | 0.182266698  | 0.137272708 | 0.186461898 |
| acetylmithoine.pcaec443        | -0.053730636 | 0.04047193  | 0.186517382 |
| histidine.pcaec363             | 0.018098991  | 0.013633873 | 0.186550587 |
| serotonin.pcaec362             | 0.049421595  | 0.037245768 | 0.186747448 |
| pcaac405.pcaec365              | 0.049661405  | 0.037427541 | 0.186759661 |
| pcaac365.valine                | 0.096556217  | 0.072786113 | 0.186856451 |
| pcaac383.smohe222              | -0.008815186 | 0.006645176 | 0.186863241 |
| isoleucine.c101                | 0.010586661  | 0.007981242 | 0.186900007 |
| pcaac344.kynurenine            | -0.012495739 | 0.009420611 | 0.186905695 |
| lysopcac280.alanine            | -0.024477036 | 0.018455547 | 0.186957106 |
| c141.lysine                    | 0.066442095  | 0.050102617 | 0.187006524 |
| c10.pcaac403                   | 0.005524029  | 0.004165595 | 0.187010574 |
| pcaec406.asparagine            | -0.022455184 | 0.01693541  | 0.187069064 |
| lysopcac280.pcaec423           | -0.005890165 | 0.00444241  | 0.187081245 |
| pcaac406.smohe241              | 0.068882076  | 0.05195215  | 0.187087429 |
| citruline.pcaec406             | 0.054341916  | 0.040988332 | 0.187115679 |
| phenylalanine.pcaac422         | -0.025246324 | 0.019046439 | 0.187206808 |



|                              |              |             |             |
|------------------------------|--------------|-------------|-------------|
| c141.c3                      | 0.089832947  | 0.067778887 | 0.187250356 |
| c181.kynurenine              | -0.013626617 | 0.010281551 | 0.187262267 |
| c51dc.pcaac422               | 0.025612269  | 0.019331264 | 0.187405161 |
| pcaec403.lysopcac280         | -0.011614132 | 0.00876883  | 0.187549226 |
| prolinr.asparagine           | 0.03185029   | 0.024049665 | 0.187590342 |
| c51dc.c51                    | 0.053037061  | 0.040047678 | 0.18759263  |
| pcaec342.pcaac380            | 0.160756806  | 0.121404068 | 0.187659247 |
| pcaac385.pcaec382            | 0.009193995  | 0.006944169 | 0.187711891 |
| c18.pcaac361                 | -0.077845487 | 0.05880263  | 0.187759667 |
| c8.c162                      | -0.127262518 | 0.096145835 | 0.187826985 |
| pcaac365.pcaec443            | -0.068836312 | 0.052019063 | 0.187943117 |
| smc161.pcaec443              | -0.074234031 | 0.056098386 | 0.187945535 |
| smc241.smc161                | 0.15891675   | 0.120107851 | 0.188000492 |
| pcaac360.kynurenine          | -0.015152623 | 0.011453818 | 0.188061841 |
| pcaec360.pcaec423            | -0.006597134 | 0.00498757  | 0.188133825 |
| pcaec420.pcaec361            | 0.024169982  | 0.01827389  | 0.188155055 |
| pcaac405.pcaec301            | 0.091990551  | 0.069551209 | 0.18816191  |
| pcaec386.smc180              | 0.035615267  | 0.026930723 | 0.188212784 |
| pcaac386.pcaec342            | 0.138828972  | 0.10503275  | 0.188448145 |
| c141.alphaaminoadipicacid    | 0.014823609  | 0.011216056 | 0.188490169 |
| pcaec363.lysopcac204         | -0.030501552 | 0.023085322 | 0.188619418 |
| pcaac424.serotonin           | -0.146926674 | 0.111221054 | 0.18869261  |
| asparagine.smc180            | 0.116177872  | 0.087949802 | 0.188717986 |
| lysopcac280.c141oh           | -0.131093501 | 0.099242695 | 0.188723996 |
| pcaec341.smohc221            | 0.063210628  | 0.047857655 | 0.188768426 |
| c141oh.c182                  | -0.062636488 | 0.047427424 | 0.188809729 |
| pcaec321.lysopcac181         | 0.061112765  | 0.046275633 | 0.188828245 |
| pcaac380.c16                 | 0.072342746  | 0.054783576 | 0.188863615 |
| pcaec445.pcaec422            | 0.062052875  | 0.046994166 | 0.188890571 |
| pcaac384.pcaec421            | 0.001358446  | 0.001029212 | 0.189073117 |
| c101.phenylalanine           | 0.068808242  | 0.052132354 | 0.189077628 |
| c3.pcaec423                  | 0.025179582  | 0.019083705 | 0.189226754 |
| c10.pcaac406                 | 0.06785501   | 0.051431513 | 0.189260364 |
| pcaac381.methioninesulfoxide | 0.094733841  | 0.071815545 | 0.189327119 |
| pcaac321.pcaec423            | -0.014673634 | 0.011124901 | 0.18937282  |
| c142.pcaec424                | -0.015274665 | 0.011582434 | 0.18944339  |
| pcaac404.asparticacid        | 0.046206544  | 0.035041614 | 0.189496552 |
| methioninesulfoxide.smohc222 | -0.017268824 | 0.013096257 | 0.189500403 |
| pcaec386.lysopcac181         | 0.032010041  | 0.024283927 | 0.189650599 |
| pcaec365.c51dc               | -0.164025645 | 0.124444858 | 0.189683541 |
| lysopcac280.pcaac341         | -0.011883933 | 0.009016359 | 0.189689406 |
| pcaac406.transhydroxyproline | 0.043906971  | 0.033317328 | 0.189755973 |
| c14.pcaec443                 | -0.096821397 | 0.073476766 | 0.189798535 |

|                                 |              |             |             |
|---------------------------------|--------------|-------------|-------------|
| pcaac281.smc181                 | -0.060439047 | 0.045867897 | 0.189811241 |
| acetylmethionine.putrescine     | -0.036889923 | 0.027996672 | 0.18981878  |
| serotonin.pcaac365              | -0.044098519 | 0.033467985 | 0.189825762 |
| pcaac380.pcaac341               | 0.010338835  | 0.00784672  | 0.189836909 |
| pcaac341.pcaac322               | -0.110798561 | 0.084098457 | 0.189874766 |
| asymmetricdimethylarginine.seri | 0.018343013  | 0.013922945 | 0.18988138  |
| pcaac343.pcaac360               | -0.009292916 | 0.007054181 | 0.189916003 |
| pcaac361.pcaac423               | -0.005905683 | 0.00448357  | 0.189975987 |
| pcaac300.lysopcac170            | 0.02664002   | 0.020227666 | 0.190034233 |
| pcaac383.pcaac363               | -0.053947817 | 0.040962991 | 0.190040877 |
| pcaac404.smc240                 | -0.034382704 | 0.026107184 | 0.190043113 |
| smc260.asparagine               | -0.029130877 | 0.02211955  | 0.190045902 |
| pcaac425.alanine                | -0.021590254 | 0.016394705 | 0.190069329 |
| pcaac384.creatinine             | 0.012698252  | 0.009642926 | 0.190088656 |
| pcaac281.alanine                | -0.037824448 | 0.028723747 | 0.190092294 |
| pcaac386.pcaac421               | 0.001700783  | 0.001291584 | 0.190097813 |
| smc161.pcaac362                 | -0.031367549 | 0.02382454  | 0.19016879  |
| pcaac402.pcaac361               | 0.026388928  | 0.020047909 | 0.190273644 |
| lysine.pcaac362                 | -0.015877976 | 0.012063266 | 0.190296371 |
| pcaac365.pcaac383               | 0.014828696  | 0.011269372 | 0.190425188 |
| pcaac342.pcaac445               | 0.077869199  | 0.059192509 | 0.190530994 |
| pcaac366.pcaac364               | -0.015898293 | 0.012085272 | 0.190535954 |
| pcaac323.pcaac424               | -0.040631323 | 0.030886895 | 0.190543424 |
| lysopcac180.smc181              | -0.017504788 | 0.013312087 | 0.190722025 |
| asparagine.c182                 | -0.098902623 | 0.075219591 | 0.19075639  |
| pcaac383.pcaac381               | 0.061554504  | 0.046817342 | 0.190780506 |
| citruline.c51                   | 0.046435749  | 0.035318343 | 0.190781467 |
| smohc161.smc181                 | 0.051376273  | 0.039097371 | 0.191022176 |
| c51dc.smohc141                  | -0.035854649 | 0.02728703  | 0.191048399 |
| c4.pcaac365                     | -0.057611368 | 0.043854376 | 0.191143814 |
| pcaac420.creatinine             | -0.023058911 | 0.017553023 | 0.191152327 |
| smc240.lysopcac182              | -0.074711425 | 0.056874259 | 0.19116818  |
| lysopcac203.c5                  | 0.030001293  | 0.022839041 | 0.19117748  |
| pcaac323.c5                     | 0.029241004  | 0.022261148 | 0.191195136 |
| serine.pcaac281                 | 0.005123635  | 0.003901338 | 0.191276507 |
| glutamicacid.c5                 | -0.02416873  | 0.018404939 | 0.191322386 |
| c162.pcaac406                   | -0.039417071 | 0.030018    | 0.191339511 |
| serotonin.smohc241              | -0.048615307 | 0.037027724 | 0.191396997 |
| pcaac300.pcaac420               | -0.128187217 | 0.097639633 | 0.191424876 |
| c182.pcaac406                   | -0.011196956 | 0.008529229 | 0.19145371  |
| smohc141.prolinr                | 0.048250733  | 0.036754896 | 0.191455222 |
| pcaac386.smc181                 | 0.038708757  | 0.029493037 | 0.191555807 |
| pcaac240.alanine                | -0.035627151 | 0.027146449 | 0.191577824 |

|                                |              |             |             |
|--------------------------------|--------------|-------------|-------------|
| histidine.pcaac402             | -0.072453692 | 0.055208553 | 0.19159197  |
| pcaec445.acetylorlithoine      | -0.102470615 | 0.078087605 | 0.191629486 |
| c14.asparticacid               | 0.050471278  | 0.03846444  | 0.191662365 |
| pcaac281.pcaac365              | -0.061420942 | 0.046815766 | 0.191723915 |
| pcaec382.asparagine            | 0.023927245  | 0.018238707 | 0.191750042 |
| c51dc.prolinr                  | 0.037600534  | 0.0286619   | 0.191759805 |
| smohc161.pcaec342              | -0.168060156 | 0.128108586 | 0.191762361 |
| pcaec381.pcaec321              | 0.062358392  | 0.047538869 | 0.191803496 |
| pcaac384.c142                  | -0.054857483 | 0.04182273  | 0.19182644  |
| pcaec446.kynurenine            | 0.014036155  | 0.010703176 | 0.191915916 |
| pcaac402.pcaac405              | -0.093624787 | 0.071404451 | 0.191987044 |
| lysopcac280.asparagine         | 0.013402926  | 0.010222167 | 0.191996115 |
| asparagine.pcaec402            | -0.04634517  | 0.035352785 | 0.192073204 |
| pcaec301.lysopcac170           | 0.014645459  | 0.011172144 | 0.192087822 |
| glutamine.pcaac403             | -0.010021652 | 0.007645818 | 0.192139843 |
| alanine.c8                     | -0.053248719 | 0.040627869 | 0.192170574 |
| smc180.smohc222                | -0.008622069 | 0.006579611 | 0.192245693 |
| c8.smohc141                    | -0.084428142 | 0.064430634 | 0.192262433 |
| pcaec341.pcaac364              | -0.062398104 | 0.04762317  | 0.192304901 |
| smc240.lysopcac180             | 0.066911043  | 0.051080784 | 0.192419735 |
| pcaac362.pcaec423              | -0.00545722  | 0.004166118 | 0.19242017  |
| lysopcac204.valine             | -0.101997594 | 0.077870303 | 0.19244231  |
| pcaac386.pcaac420              | -0.084849212 | 0.064788042 | 0.19250857  |
| asymmetricdimethylarginine.c14 | -0.052912556 | 0.040413231 | 0.192628475 |
| c0.pcaac421                    | -0.066588993 | 0.050859997 | 0.192637689 |
| c182.pcaec424                  | -0.01578943  | 0.012062142 | 0.192723311 |
| c181.alanine                   | 0.043148324  | 0.032969179 | 0.192811104 |
| pcaac360.pcaac380              | 0.182558367  | 0.139510043 | 0.192871734 |
| pcaec403.pcaec365              | 0.035480422  | 0.027116325 | 0.192910774 |
| leucine.lysopcac161            | -0.129060474 | 0.098640257 | 0.192930002 |
| ornithine.pcaec424             | -0.006883748 | 0.005261523 | 0.19295601  |
| creatinine.citruline           | 0.025362255  | 0.019389413 | 0.193048013 |
| pcaec300.citruline             | 0.05218032   | 0.039894879 | 0.193082263 |
| lysopcac182.pcaec424           | 0.017540346  | 0.013411633 | 0.193115989 |
| smohc141.alanine               | -0.05237412  | 0.040047667 | 0.193133274 |
| c3.c51                         | 0.038376473  | 0.029344519 | 0.193134755 |
| putrescine.lysopcac181         | 0.043700925  | 0.033427554 | 0.193289668 |
| glutamicacid.c101              | 0.021623934  | 0.016541361 | 0.193312656 |
| pcaac362.c142                  | 0.069596076  | 0.053239167 | 0.193322825 |
| pcaec444.pcaac403              | -0.07040755  | 0.053869917 | 0.193404955 |
| c14.pcaec383                   | 0.092119627  | 0.070482812 | 0.193409009 |
| pcaac364.smc202                | 0.057131244  | 0.043714264 | 0.193427801 |
| c4.smohc161                    | -0.026442175 | 0.020235289 | 0.193491754 |

|                               |              |             |             |
|-------------------------------|--------------|-------------|-------------|
| pcaec446.alphaaminoadipicacid | 0.008880178  | 0.006795761 | 0.193496016 |
| pcaac300.pcaac402             | -0.051446363 | 0.039376048 | 0.193558246 |
| pcaec386.smc202               | 0.053110867  | 0.040652504 | 0.193585225 |
| lysopcac181.pcaac402          | 0.07561074   | 0.057876838 | 0.193602966 |
| histidine.pcaec444            | -0.1679096   | 0.128548718 | 0.193675276 |
| c162.pcaec443                 | -0.088162323 | 0.067500141 | 0.193705287 |
| pcaac344.tyrosine             | 0.085788713  | 0.065683619 | 0.193710659 |
| pcaac405.pcaac281             | 0.003567705  | 0.002731841 | 0.193750931 |
| pcaec380.alanine              | -0.02039746  | 0.015619054 | 0.193763396 |
| pcaec363.pcaec342             | 0.300541618  | 0.230175668 | 0.193841075 |
| ornithine.glutamicacid        | -0.06907167  | 0.052902596 | 0.193863756 |
| pcaec446.pcaec385             | -0.123103334 | 0.094288147 | 0.193874223 |
| pcaac342.pcaec423             | -0.007292247 | 0.005587719 | 0.194063853 |
| smc202.pcaac300               | 0.062129294  | 0.047623059 | 0.194214577 |
| lysopcac204.smc240            | -0.057691163 | 0.04423079  | 0.194311069 |
| c3.pcaac341                   | 0.006589517  | 0.005052982 | 0.194391489 |
| pcaec382.pcaac341             | 0.016270546  | 0.012478801 | 0.194469646 |
| alanine.asparticacid          | -0.064854966 | 0.049741154 | 0.194471567 |
| histidine.transhydroxyproline | -0.058096632 | 0.044564126 | 0.194534691 |
| pcaec402.lysopcac161          | 0.064481466  | 0.049466558 | 0.194577935 |
| pcaac320.smohc241             | 0.079168178  | 0.060733977 | 0.194582307 |
| smc202.pcaac426               | -0.079666983 | 0.061123963 | 0.194635484 |
| pcaec402.smc202               | 0.151483886  | 0.116231345 | 0.194659675 |
| smc240.pcaec340               | -0.044582348 | 0.034211704 | 0.194715796 |
| lysopcac180.lysopcac181       | -0.147164648 | 0.112948353 | 0.194781815 |
| pcaac420.transhydroxyproline  | 0.082942427  | 0.063671501 | 0.194875738 |
| pcaec300.c182                 | -0.039999719 | 0.030710859 | 0.194943863 |
| pcaac281.pcaec341             | 0.182892408  | 0.140421221 | 0.19494595  |
| pcaac366.alanine              | -0.021429219 | 0.016456774 | 0.195049477 |
| pcaac342.smohc161             | 0.031691209  | 0.02433772  | 0.195052245 |
| smohc241.putrescine           | -0.052988223 | 0.040695029 | 0.195073625 |
| pcaac366.pcaac281             | -0.005321909 | 0.004087925 | 0.195148672 |
| lysopcac181.lysopcac161       | -0.221693352 | 0.170305256 | 0.195189497 |
| pcaec406.lysopcac203          | -0.022941255 | 0.01762354  | 0.195190106 |
| pcaac386.pcaec361             | -0.017972593 | 0.013812859 | 0.195391347 |
| c141oh.pcaec301               | -0.052391307 | 0.040265751 | 0.195395176 |
| pcaec421.pcaec382             | 0.036457992  | 0.028020664 | 0.195404493 |
| glutamine.pcaec380            | -0.074520023 | 0.057279849 | 0.195448664 |
| pcaac426.pcaec342             | 0.138725002  | 0.106731673 | 0.195867734 |
| c162.c51                      | 0.105638841  | 0.081287215 | 0.195929169 |
| pcaec385.c8                   | -0.088843748 | 0.06837137  | 0.195979103 |
| c101.acetylmethionine         | -0.099456591 | 0.076541111 | 0.195993206 |
| glycine.pcaac360              | -0.071044985 | 0.054676512 | 0.195999539 |

|                               |              |             |             |
|-------------------------------|--------------|-------------|-------------|
| pcaac421.pcaec361             | -0.02754414  | 0.021198135 | 0.196000614 |
| pcaac424.lysopcac280          | -0.017866102 | 0.013751243 | 0.196045351 |
| pcaec343.pcaec301             | -0.069940487 | 0.05383423  | 0.196063475 |
| pcaec363.alphaaminoadipicacid | 0.029308905  | 0.022567678 | 0.196224643 |
| ornithine.pcaec300            | 0.028583161  | 0.022015045 | 0.196349589 |
| pcaec403.lysopcac161          | 0.07609062   | 0.058614574 | 0.196416316 |
| pcaec446.pcaec360             | -0.014835388 | 0.011429408 | 0.196467862 |
| smc160.prolinr                | 0.049080517  | 0.037812656 | 0.196471117 |
| serine.tyrosine               | -0.076343366 | 0.058818774 | 0.19648818  |
| putrescine.kynurenine         | 0.013332406  | 0.010272999 | 0.19653329  |
| glycine.c51                   | 0.083803834  | 0.064573929 | 0.196538025 |
| pcaec445.pcaec402             | -0.039154231 | 0.030170874 | 0.196554274 |
| pcaec405.c18                  | 0.066869342  | 0.051533965 | 0.196612988 |
| pcaec301.c51dc                | 0.147346153  | 0.113567302 | 0.196662158 |
| pcaac403.alanine              | -0.02177176  | 0.016783379 | 0.196735249 |
| glycine.pcaac403              | -0.007263632 | 0.005599797 | 0.196768683 |
| pcaac383.h1                   | 0.004763872  | 0.003672963 | 0.196807599 |
| pcaec421.creatinine           | -0.022327991 | 0.017217877 | 0.196882923 |
| pcaec340.smohc221             | -0.101872    | 0.078601632 | 0.197135856 |
| pcaac406.pcaec423             | -0.004177703 | 0.003223697 | 0.197176726 |
| methionine.pcaac362           | -0.035979441 | 0.027763814 | 0.197185045 |
| pcaec424.c141                 | 0.035389548  | 0.027309912 | 0.197206138 |
| asparagine.valine             | 0.070011582  | 0.05402869  | 0.197215634 |
| pcaec340.lysopcac204          | -0.069136081 | 0.053357891 | 0.197255984 |
| lysopcac203.lysopcac182       | 0.043789855  | 0.033797645 | 0.197275503 |
| lysopcac182.asparticacid      | 0.027471369  | 0.021204356 | 0.197308166 |
| putrescine.smc180             | 0.058712689  | 0.045321682 | 0.197338179 |
| pcaac341.pcaec343             | 0.143893398  | 0.111089298 | 0.197396942 |
| pcaec402.pcaac403             | -0.015404741 | 0.011894495 | 0.197458763 |
| pcaec382.lysopcac182          | -0.0821153   | 0.063404556 | 0.197463635 |
| pcaac386.lysine               | 0.125286098  | 0.096747075 | 0.197503209 |
| pcaec340.smc240               | -0.040388317 | 0.031188505 | 0.19750715  |
| pcaec444.pcaec360             | -0.018597419 | 0.014362413 | 0.197544024 |
| pcaac386.pcaec420             | -0.079198237 | 0.061163264 | 0.197544425 |
| pcaec405.glutamicacid         | 0.098073815  | 0.075740998 | 0.197547309 |
| pcaac320.asparticacid         | 0.081502367  | 0.062960389 | 0.197669628 |
| pcaec322.pcaac240             | -0.023041689 | 0.017799827 | 0.197674043 |
| pcaac386.transhydroxyproline  | 0.034704367  | 0.026811156 | 0.197704762 |
| c8.pcaac323                   | -0.180917786 | 0.139779187 | 0.197735364 |
| pcaec403.c5                   | -0.045313252 | 0.035015724 | 0.197814    |
| pcaac300.pcaac420             | -0.1342782   | 0.103768587 | 0.197837103 |
| c141.pcaec423                 | -0.011324445 | 0.008752118 | 0.1978739   |
| smohc222.pcaec401             | 0.106764195  | 0.082516113 | 0.19789123  |

|                             |              |             |             |
|-----------------------------|--------------|-------------|-------------|
| pcaac402.smohc221           | -0.112542444 | 0.086982379 | 0.197893088 |
| methioninesulfoxide.alanine | -0.047220388 | 0.036496371 | 0.197898412 |
| lysopcac281.pcaec300        | -0.087562217 | 0.067687676 | 0.197973065 |
| leucine.c101                | 0.011105062  | 0.008584967 | 0.197998472 |
| pcaec405.pcaac381           | 0.052042545  | 0.040251594 | 0.198210933 |
| c141oh.pcaec423             | -0.014522546 | 0.01123281  | 0.198232608 |
| asparagine.pcaec424         | 0.016030324  | 0.012399386 | 0.198245153 |
| lysopcac204.pcaec360        | -0.00829869  | 0.006419502 | 0.198280012 |
| kynurenine.pcaac362         | -0.022052808 | 0.017061098 | 0.198332653 |
| smohc141.pcaac403           | -0.011828102 | 0.009151131 | 0.198349722 |
| pcaac383.pcaac425           | -0.137595998 | 0.106456358 | 0.198355991 |
| pcaac402.ornithine          | -0.079317547 | 0.061372846 | 0.198398299 |
| c8.pcaac403                 | 0.004187025  | 0.003239985 | 0.198429691 |
| serine.lysopcac203          | 0.014091257  | 0.010906938 | 0.198548387 |
| lysine.pcaac403             | -0.012628259 | 0.009775708 | 0.198601454 |
| pcaac402.lysopcac161        | 0.104580711  | 0.080981305 | 0.198733421 |
| pcaec446.pcaec424           | 0.020768239  | 0.016082771 | 0.198762211 |
| pcaec363.lysopcac161        | 0.09029819   | 0.069937331 | 0.198832932 |
| pcaac420.c16                | 0.047978209  | 0.037160148 | 0.198836422 |
| pcaac360.glutamicacid       | 0.09092092   | 0.07042241  | 0.198850458 |
| pcaec321.c51                | 0.077512949  | 0.060041547 | 0.198881861 |
| pcaac361.asparticacid       | 0.032285088  | 0.025013333 | 0.198976413 |
| pcaac344.pcaec362           | -0.050553429 | 0.039167319 | 0.19898014  |
| lysopcac281.pcaec423        | -0.006301639 | 0.004882902 | 0.199032811 |
| pcaac421.lysopcac180        | -0.094891606 | 0.073535818 | 0.199080798 |
| lysopcac160.c2              | 0.123580285  | 0.095778319 | 0.19912901  |
| pcaac405.pcaec446           | -0.063028909 | 0.048855513 | 0.199186352 |
| pcaec342.c5                 | 0.025935112  | 0.020103523 | 0.199196913 |
| glutamine.pcaec424          | 0.026579383  | 0.020603457 | 0.199208384 |
| histidine.pcaac360          | -0.036516261 | 0.028311249 | 0.199288103 |
| pcaec384.pcaec421           | 0.001390461  | 0.001078034 | 0.199288996 |
| pcaec422.pcaac361           | 0.082677396  | 0.064109222 | 0.199350836 |
| pcaec444.c142               | 0.059153367  | 0.045870635 | 0.199373017 |
| pcaec383.c141               | 0.054033444  | 0.041903521 | 0.199406534 |
| lysopcac280.pcaec446        | 0.123766036  | 0.095982203 | 0.19940794  |
| pcaac386.pcaec423           | -0.004809397 | 0.003729869 | 0.199421975 |
| pcaac422.pcaec402           | -0.080945615 | 0.06278282  | 0.19946787  |
| pcaec424.pcaac385           | -0.060140898 | 0.046650079 | 0.199503862 |
| pcaac381.lysine             | 0.125142728  | 0.097079426 | 0.199544095 |
| pcaec403.pcaec380           | 0.110279826  | 0.085559693 | 0.199597144 |
| lysine.ornithine            | 0.080758407  | 0.062660581 | 0.199631642 |
| pcaac323.pcaac344           | 0.069513138  | 0.053946586 | 0.199724669 |
| smc160.pcaac322             | -0.074087562 | 0.057508964 | 0.199820564 |

|                              |              |             |             |
|------------------------------|--------------|-------------|-------------|
| pcaec365.pcaec443            | -0.067624614 | 0.052502274 | 0.199906076 |
| pcaec401.lysopcac160         | 0.045947913  | 0.035681784 | 0.200016697 |
| c51.asparticacid             | 0.025201738  | 0.019571177 | 0.200022538 |
| c16.citruline                | 0.055726429  | 0.043284392 | 0.200108686 |
| pcaac360.pcaec421            | 0.003130941  | 0.002432068 | 0.200140289 |
| pcaec360.c141oh              | -0.151544112 | 0.117719223 | 0.200148033 |
| pcaac406.c18                 | -0.051301174 | 0.039853743 | 0.200182523 |
| pcaac383.putrescine          | -0.032984455 | 0.025625141 | 0.200198128 |
| lysopcac181.c51              | -0.08267488  | 0.064233198 | 0.200228002 |
| lysopcac140.lysine           | -0.135631022 | 0.105397812 | 0.200317181 |
| histidine.glycine            | 0.048489831  | 0.037682272 | 0.200331443 |
| pcaac365.pcaac420            | -0.09501699  | 0.073840588 | 0.20033914  |
| pcaec424.c182                | -0.054099014 | 0.042042968 | 0.200349588 |
| pcaec342.prolinr             | 0.027287613  | 0.021212339 | 0.200472182 |
| smc240.c141                  | 0.069436562  | 0.053984356 | 0.200530594 |
| pcaec383.pcaec380            | 0.10634679   | 0.082701488 | 0.200643138 |
| pcaec401.pcaac322            | -0.100913362 | 0.078483276 | 0.200683852 |
| lysopcac203.pcaec361         | 0.007785829  | 0.006055353 | 0.200690224 |
| pcaac425.pcaec361            | 0.021109584  | 0.016417838 | 0.200691933 |
| pcaec321.pcaac240            | -0.03638929  | 0.028309408 | 0.200816559 |
| c2.lysopcac182               | -0.113780605 | 0.088520132 | 0.200833678 |
| pcaac385.pcaec361            | -0.013936285 | 0.01084349  | 0.20088344  |
| pcaac425.pcaec340            | 0.076241212  | 0.059332264 | 0.200964923 |
| lysopcac280.pcaac380         | 0.044501165  | 0.034632644 | 0.200978469 |
| pcaac341.c141oh              | -0.139742795 | 0.108759936 | 0.201004505 |
| pcaac362.kynurenine          | -0.009758319 | 0.007594857 | 0.201009739 |
| pcaec421.alanine             | -0.024212769 | 0.018850042 | 0.201136847 |
| pcaac381.taurine             | 0.074769225  | 0.058210884 | 0.201150719 |
| pcaec445.pcaac322            | -0.087805535 | 0.068365441 | 0.201185174 |
| pcaec425.pcaac403            | -0.007699179 | 0.005995395 | 0.201245677 |
| pcaec385.c51dc               | -0.160803627 | 0.125225091 | 0.201268499 |
| acetylmithoine.pcaac341      | 0.017799766  | 0.013863868 | 0.201345472 |
| methioninesulfoxide.pcaec406 | 0.090229828  | 0.070290495 | 0.201424218 |
| citruline.glutamine          | 0.034511378  | 0.026885172 | 0.201428403 |
| c14.smohc222                 | 0.018529792  | 0.014435833 | 0.20144983  |
| c3.smc181                    | 0.02938576   | 0.022901599 | 0.201612427 |
| pcaac381.pcaec342            | 0.145456893  | 0.113374186 | 0.201665053 |
| smc240.pcaec404              | 0.022493544  | 0.017534789 | 0.201729848 |
| lysine.c51                   | 0.055803758  | 0.043505583 | 0.201769982 |
| putrescine.smohc221          | -0.039030281 | 0.030431812 | 0.201816007 |
| pcaec384.c141oh              | -0.151721497 | 0.118331318 | 0.20194655  |
| pcaac383.pcaec406            | 0.01240502   | 0.009675182 | 0.201955936 |
| asparticacid.c51             | -0.136131526 | 0.106208775 | 0.202100505 |

|                             |              |             |             |
|-----------------------------|--------------|-------------|-------------|
| c14.pcaec421                | 0.005490496  | 0.004283905 | 0.202127914 |
| pcaec383.pcaac405           | -0.080595143 | 0.06288464  | 0.20213564  |
| serotonin.pcaac321          | -0.038465265 | 0.030015939 | 0.202184681 |
| c2.pcaec402                 | -0.058998853 | 0.046041461 | 0.202207747 |
| smc241.pcaec423             | -0.03266201  | 0.025488757 | 0.202207967 |
| pcaac381.smohc141           | 0.043102866  | 0.033637234 | 0.202216633 |
| pcaac363.putrescine         | -0.035304477 | 0.027556038 | 0.202291881 |
| smc181.alphaaminoadipicacid | 0.011998071  | 0.009365325 | 0.202317111 |
| pcaec401.c8                 | -0.061528454 | 0.048030947 | 0.202351964 |
| c18.pcaec362                | 0.064800072  | 0.050592477 | 0.20241943  |
| pcaec343.putrescine         | -0.045025135 | 0.035154058 | 0.202429745 |
| pcaec381.pcaac405           | -0.078844699 | 0.061560814 | 0.202441534 |
| lysopcac170.lysopcac181     | -0.131161768 | 0.102440476 | 0.202578412 |
| pcaac386.serotonin          | -0.150394014 | 0.117474584 | 0.202629089 |
| ornithine.lysopcac182       | -0.019402605 | 0.015156444 | 0.202653816 |
| prolinr.pcaac422            | -0.012977097 | 0.010137357 | 0.202664052 |
| c2.phenylalanine            | 0.081154188  | 0.06339567  | 0.202665566 |
| pcaac323.pcaec385           | -0.067803314 | 0.052974095 | 0.202731679 |
| smc240.ornithine            | -0.044921256 | 0.035102035 | 0.202801726 |
| asparticacid.pcaec420       | 0.062121025  | 0.048548191 | 0.202857589 |
| citruline.pcaac383          | 0.02396204   | 0.018727896 | 0.202889395 |
| c142.c3                     | 0.066317551  | 0.051841841 | 0.202979063 |
| pcaec382.lysopcac170        | -0.066245195 | 0.051791293 | 0.203031213 |
| creatinine.lysopcac181      | -0.053150833 | 0.041560907 | 0.203106255 |
| pcaac342.asparagine         | 0.009838234  | 0.00769294  | 0.203106523 |
| prolinr.lysopcac161         | -0.107130467 | 0.08377412  | 0.203128938 |
| pcaec322.c101               | -0.013759043 | 0.010760351 | 0.203171708 |
| lysopcac281.alanine         | -0.020155782 | 0.015763691 | 0.203192422 |
| pcaec385.pcaec382           | 0.031952491  | 0.024990842 | 0.203210942 |
| smohc221.glycine            | 0.080546888  | 0.063002804 | 0.203247086 |
| prolinr.lysopcac170         | -0.02891306  | 0.02261704  | 0.203278727 |
| lysopcac161.glycine         | -0.049095187 | 0.038406474 | 0.20330336  |
| pcaec401.pcaac361           | 0.102011207  | 0.079805259 | 0.203322093 |
| pcaac381.pcaec381           | 0.063220714  | 0.049465538 | 0.203383866 |
| pcaac344.pcaac341           | -0.012694257 | 0.009934584 | 0.203486324 |
| pcaac401.leucine            | -0.065336872 | 0.051139475 | 0.2035438   |
| asparticacid.pcaec402       | -0.168550073 | 0.131934603 | 0.203576755 |
| pcaec425.pcaec362           | 0.016202607  | 0.01268285  | 0.203579005 |
| pcaec384.pcaac381           | 0.05318706   | 0.041635095 | 0.203601389 |
| methionine.pcaec363         | 0.03410882   | 0.026705488 | 0.20368444  |
| lysopcac204.pcaac366        | -0.029557429 | 0.023144232 | 0.20372822  |
| isoleucine.pcaec404         | 0.03049539   | 0.023881971 | 0.203790179 |
| glutamine.pcaac281          | 0.001974885  | 0.001546859 | 0.203865537 |



|                           |              |             |             |
|---------------------------|--------------|-------------|-------------|
| arginine.creatinine       | -0.019286921 | 0.01510728  | 0.203880641 |
| pcaac361.pcaac364         | -0.079502774 | 0.062290286 | 0.203999362 |
| pcaac404.smohc222         | -0.007767603 | 0.006087482 | 0.20411594  |
| pcaec444.c141             | 0.023918554  | 0.018745569 | 0.204129487 |
| pcaec360.c101             | -0.018002181 | 0.014109779 | 0.204161992 |
| pcaec423.c142             | 0.061291423  | 0.048047996 | 0.204245342 |
| pcaac365.acetylmethionine | -0.138804812 | 0.108821978 | 0.204283169 |
| c162.putrescine           | -0.0219063   | 0.017175154 | 0.204303381 |
| glutamine.smohc161        | -0.011436086 | 0.008966695 | 0.204327583 |
| pcaec403.pcaec404         | 0.067491405  | 0.0529246   | 0.204383673 |
| pcaec321.pcaec404         | -0.013560611 | 0.010634727 | 0.204423001 |
| pcaec322.pcaac341         | 0.010463162  | 0.008206847 | 0.204491704 |
| pcaac401.lysopcac182      | -0.111357089 | 0.08735674  | 0.204559217 |
| pcaec406.lysine           | 0.13115374   | 0.102891095 | 0.204578452 |
| c182.alphaaminoadipicacid | 0.005923124  | 0.004646953 | 0.204599512 |
| pcaac281.pcaac406         | -0.048258364 | 0.037861323 | 0.204605482 |
| lysopcac170.pcaec340      | -0.072666872 | 0.057013612 | 0.204625063 |
| c14.pcaec401              | -0.050924276 | 0.039958959 | 0.204673994 |
| smc202.c51dc              | -0.175546748 | 0.137753537 | 0.204695412 |
| pcaac281.pcaac403         | -0.0128328   | 0.010073133 | 0.204833451 |
| lysopcac203.asparticacid  | 0.035215744  | 0.027643732 | 0.204850721 |
| putrescine.c18            | -0.033194782 | 0.026057892 | 0.204860722 |
| acetylmethionine.glycine  | 0.048580233  | 0.038140613 | 0.204921489 |
| glutamine.pcaac341        | -0.004493424 | 0.003527894 | 0.204931917 |
| ornithine.pcaac281        | 0.005615103  | 0.004410688 | 0.205150175 |
| pcaac343.pcaac420         | -0.152277607 | 0.119626863 | 0.205195853 |
| pcaec364.glycine          | 0.056221273  | 0.044178631 | 0.20531918  |
| lysopcac140.pcaec404      | 0.030150713  | 0.023692951 | 0.205329543 |
| pcaec322.pcaec443         | -0.06457837  | 0.050747166 | 0.205332808 |
| pcaec363.pcaac341         | 0.028715221  | 0.022565695 | 0.20534508  |
| pcaac323.lysopcac280      | 0.013585564  | 0.010676339 | 0.205353505 |
| kynurenine.pcaac402       | 0.093745719  | 0.07367498  | 0.20537831  |
| pcaac403.pcaec342         | 0.127525132  | 0.100229531 | 0.205410815 |
| smc241.c16                | 0.05370386   | 0.042210764 | 0.205429278 |
| pcaac384.smohc141         | -0.054213449 | 0.042612231 | 0.20543916  |
| pcaec343.arginine         | -0.067310723 | 0.052930104 | 0.205637599 |
| methionine.c101           | 0.013513576  | 0.010626844 | 0.205653739 |
| serotonin.pcaac383        | -0.006172864 | 0.004854802 | 0.205706471 |
| pcaac361.kynurenine       | -0.00761719  | 0.005991192 | 0.205741343 |
| lysopcac204.creatinine    | 0.020492853  | 0.016120446 | 0.205799654 |
| pcaec364.pcaac364         | -0.08986297  | 0.070702461 | 0.205881788 |
| lysopcac160.smc202        | 0.053511059  | 0.042106435 | 0.205934897 |
| smohc221.putrescine       | -0.040703064 | 0.032028485 | 0.205939438 |

|                                             |              |             |             |
|---------------------------------------------|--------------|-------------|-------------|
| smc202.pcaec362                             | 0.051697737  | 0.040680473 | 0.205944808 |
| c10.methioninesulfoxide                     | 0.021092342  | 0.016598127 | 0.205965371 |
| acetylmethionine.asymmetricdimethylarginine | 0.034999412  | 0.027542988 | 0.205982019 |
| smohc222.pcaac403                           | -0.007985902 | 0.006287139 | 0.206167666 |
| histidine.smc240                            | -0.095651467 | 0.075309294 | 0.206196578 |
| pcaac323.pcaac366                           | -0.056274485 | 0.044309658 | 0.206227664 |
| smohc141.smc260                             | 0.058053902  | 0.045712008 | 0.206240136 |
| smohc241.smc240                             | 0.046472829  | 0.036595238 | 0.206267742 |
| pcaec445.asymmetricdimethylarginine         | 0.028218604  | 0.022224431 | 0.206340082 |
| phenylalanine.pcaac403                      | -0.013193939 | 0.010391901 | 0.206366492 |
| pcaac406.pcaec365                           | -0.032719973 | 0.025771993 | 0.206381594 |
| pcaec446.c141                               | 0.033776786  | 0.026606545 | 0.206418044 |
| methionine.c3                               | -0.120567995 | 0.094982914 | 0.206463014 |
| c2.citruline                                | 0.031283321  | 0.024646025 | 0.206484398 |
| h1.pcaac405                                 | -0.110917553 | 0.087385453 | 0.206489413 |
| methionine.smohc141                         | -0.065679126 | 0.051747281 | 0.206511551 |
| asymmetricdimethylarginine.glycine          | -0.07839354  | 0.061768936 | 0.206542383 |
| c8.c3                                       | 0.095355346  | 0.075135154 | 0.206550997 |
| pcaec446.smc240                             | -0.114745652 | 0.090414574 | 0.206555225 |
| pcaac425.smc240                             | -0.036749864 | 0.028959072 | 0.206582957 |
| pcaac426.pcaec364                           | -0.025478662 | 0.020084652 | 0.206747965 |
| lysopcac281.lysopcac181                     | 0.039179418  | 0.030885243 | 0.206753531 |
| pcaec420.pcaec423                           | -0.019088863 | 0.015052955 | 0.20690806  |
| smc241.pcaec300                             | -0.030792875 | 0.024283862 | 0.206934884 |
| pcaec384.transhydroxyproline                | 0.040643498  | 0.032059304 | 0.207034159 |
| pcaec365.smc181                             | 0.035498992  | 0.028002701 | 0.207055878 |
| pcaec322.asparagine                         | 0.014632933  | 0.01154465  | 0.207123965 |
| c51dc.c141                                  | 0.036041601  | 0.028435019 | 0.207124029 |
| pcaac361.pcaac405                           | 0.11338968   | 0.089461925 | 0.207139898 |
| lysopcac170.putrescine                      | -0.068186042 | 0.053800254 | 0.207164998 |
| pcaac320.pcaec421                           | 0.002639668  | 0.0020832   | 0.207261664 |
| pcaac381.lysopcac161                        | 0.084521678  | 0.066705648 | 0.207274868 |
| asparagine.c142                             | 0.045682288  | 0.036054135 | 0.207288109 |
| pcaac361.putrescine                         | -0.033213935 | 0.026219507 | 0.207388952 |
| pcaec322.pcaac384                           | 0.127206091  | 0.100425917 | 0.207424021 |
| pcaec300.pcaec423                           | -0.010671684 | 0.008426697 | 0.207514008 |
| serine.pcaec423                             | -0.010102266 | 0.007977086 | 0.207515121 |
| smohc161.pcaac322                           | -0.083288552 | 0.06577496  | 0.207566938 |
| pcaac321.leucine                            | -0.012151959 | 0.00959769  | 0.207613903 |
| smc261.pcaec343                             | -0.081838063 | 0.064642094 | 0.207655165 |
| pcaac386.glutamicacid                       | 0.049483008  | 0.039096823 | 0.20778556  |
| pcaac405.kynurenine                         | -0.011575523 | 0.009146311 | 0.207806318 |
| pcaec402.c142                               | 0.053015114  | 0.041893476 | 0.207849375 |

|                                |              |             |             |
|--------------------------------|--------------|-------------|-------------|
| prolinr.pcaac360               | -0.027691376 | 0.021883331 | 0.207872483 |
| phenylalanine.lysopcac280      | -0.031923786 | 0.02522885  | 0.207887225 |
| c10.pcaac380                   | -0.069337348 | 0.05480346  | 0.207947275 |
| pcaac281.pcaec443              | -0.067699228 | 0.053511023 | 0.207966832 |
| pcaec382.pcaec342              | 0.108154659  | 0.085508951 | 0.208078022 |
| pcaac404.pcaac360              | 0.041731528  | 0.032997983 | 0.208137121 |
| pcaec361.asparagine            | 0.013014789  | 0.010292343 | 0.208193342 |
| pcaec421.pcaac361              | 0.077453305  | 0.0612577   | 0.208238767 |
| pcaac281.c141oh                | -0.137760674 | 0.10899367  | 0.208400488 |
| c14.smohc141                   | -0.034943217 | 0.027648847 | 0.208440195 |
| glutamicacid.c51               | -0.08434226  | 0.066742123 | 0.20848253  |
| lysopcac140.smohc221           | -0.056304098 | 0.044560525 | 0.208540351 |
| pcaec322.tyrosine              | -0.070043006 | 0.055434588 | 0.208546354 |
| pcaec343.pcaac341              | 0.006967392  | 0.005514437 | 0.208561917 |
| c142.c2                        | 0.076275795  | 0.060372553 | 0.208584636 |
| c162.valine                    | -0.078810965 | 0.062383681 | 0.208617504 |
| h1.pcaec401                    | 0.098196408  | 0.077731956 | 0.208637971 |
| pcaec424.pcaac361              | 0.059316448  | 0.046956397 | 0.208654266 |
| c16.smohc161                   | -0.046221573 | 0.036608166 | 0.208876863 |
| pcaec360.pcaec363              | -0.043198884 | 0.034216581 | 0.208909002 |
| lysopcac182.pcaac385           | 0.040097184  | 0.031764827 | 0.208980435 |
| pcaac323.lysopcac181           | 0.049460924  | 0.039183906 | 0.208993857 |
| methionine.pcaac403            | -0.006282182 | 0.004976902 | 0.208997083 |
| pcaac425.asymmetricdimethylar; | 0.036078656  | 0.0285841   | 0.209023743 |
| pcaac341.pcaec423              | -0.006969921 | 0.005522293 | 0.209041872 |
| spermidine.lysopcac203         | 0.140358958  | 0.111212871 | 0.209066219 |
| pcaac362.pcaec404              | -0.017341896 | 0.013741448 | 0.20908813  |
| c2.arginine                    | 0.086525657  | 0.068565309 | 0.20911273  |
| pcaec443.pcaec402              | -0.135149398 | 0.107097889 | 0.209120302 |
| c162.pcaac323                  | -0.092045059 | 0.07294157  | 0.209128463 |
| pcaac426.pcaec423              | -0.007296306 | 0.005782414 | 0.209161334 |
| pcaac322.pcaac341              | -0.008424274 | 0.006676623 | 0.209180376 |
| pcaac422.serotonin             | -0.140644417 | 0.111482205 | 0.209241513 |
| smohc161.smohc222              | -0.010372488 | 0.008222788 | 0.209296857 |
| serine.pcaac403                | -0.008559253 | 0.006785957 | 0.209337647 |
| lysopcac204.lysopcac180        | -0.127762197 | 0.101316309 | 0.209443752 |
| pcaac360.c101                  | -0.032209584 | 0.025549866 | 0.20957572  |
| pcaac362.smohc221              | 0.029789866  | 0.02363051  | 0.209576814 |
| pcaac323.smc160                | -0.125779351 | 0.099775611 | 0.209587752 |
| pcaec342.asparticacid          | 0.060786955  | 0.048221387 | 0.209602627 |
| glycine.pcaec443               | -0.078441131 | 0.062234721 | 0.2096648   |
| pcaac344.pcaec423              | -0.010764552 | 0.008540721 | 0.209674899 |
| pcaac384.pcaec382              | 0.006930781  | 0.005499638 | 0.209730533 |

|                         |              |             |             |
|-------------------------|--------------|-------------|-------------|
| leucine.pcaac341        | 0.007607767  | 0.006037093 | 0.209750078 |
| h1.c4                   | 0.093461472  | 0.074189238 | 0.209893717 |
| c14.pcaec423            | -0.016151436 | 0.012821759 | 0.209923111 |
| alanine.pcaac341        | -0.00579485  | 0.00460056  | 0.209956614 |
| isoleucine.smohc141     | -0.021682582 | 0.017214374 | 0.209968801 |
| c51.putrescine          | -0.023881568 | 0.018961919 | 0.210009724 |
| pcaac380.c102           | 0.046005306  | 0.036540081 | 0.21015808  |
| c18.smc181              | 0.03784016   | 0.030055906 | 0.210174039 |
| c51dc.lysopcac203       | 0.021081489  | 0.016745273 | 0.210188744 |
| smc202.pcaac384         | 0.057409589  | 0.045606281 | 0.210240172 |
| pcaec424.pcaec383       | -0.113692511 | 0.090319011 | 0.21024758  |
| c8.pcaec342             | 0.093808087  | 0.074526016 | 0.210268786 |
| pcaac404.c12            | 0.068728287  | 0.054605022 | 0.210299528 |
| phenylalanine.pcaac281  | 0.003219181  | 0.002558206 | 0.210396684 |
| pcaec423.leucine        | -0.020973899 | 0.016671956 | 0.210519163 |
| pcaec446.pcaac406       | -0.05075071  | 0.040348087 | 0.210595863 |
| putrescine.pcaec423     | -0.006570569 | 0.005224409 | 0.210651592 |
| c182.pcaac405           | 0.081355284  | 0.064709192 | 0.210804139 |
| h1.pcaec342             | 0.159519773  | 0.126907159 | 0.210899624 |
| asparagine.pcaec404     | 0.028308498  | 0.022522651 | 0.210932112 |
| leucine.smohc241        | 0.063445585  | 0.050486939 | 0.211010424 |
| citruline.pcaac343      | -0.034659494 | 0.02758116  | 0.211023674 |
| pcaec422.pcaec401       | 0.123930295  | 0.098634397 | 0.211087007 |
| c141.glycine            | -0.043642699 | 0.03473519  | 0.211094501 |
| pcaec444.phenylalanine  | 0.069931603  | 0.055680221 | 0.21127156  |
| pcaac361.pcaac420       | -0.078599    | 0.062589041 | 0.211327813 |
| lysopcac204.pcaec443    | 0.111249294  | 0.088589739 | 0.211332915 |
| isoleucine.smohc241     | 0.071086616  | 0.056615293 | 0.211395392 |
| pcaec365.h1             | 0.002319343  | 0.001847197 | 0.211397809 |
| pcaec382.pcaec360       | -0.010831032 | 0.008626489 | 0.21141453  |
| pcaec343.leucine        | -0.016297266 | 0.012981688 | 0.211469084 |
| asparticacid.c51dc      | 0.180873912  | 0.144088129 | 0.211506598 |
| lysopcac180.lysopcac182 | 0.080698239  | 0.064287038 | 0.211514007 |
| pcaac322.c18            | 0.060116052  | 0.047891656 | 0.211524515 |
| ornithine.pcaec422      | -0.038821904 | 0.030930091 | 0.211561074 |
| smohc221.smohc141       | -0.082963212 | 0.066106381 | 0.211616984 |
| isoleucine.c16          | -0.074321904 | 0.059227473 | 0.211667758 |
| pcaac425.pcaec423       | -0.006593185 | 0.005254216 | 0.211674357 |
| asparagine.pcaec363     | 0.014308297  | 0.011403276 | 0.211704694 |
| smc240.prolinr          | -0.041638955 | 0.033185073 | 0.21170602  |
| serotonin.pcaec423      | -0.028382536 | 0.022620583 | 0.211716113 |
| smohc241.prolinr        | -0.024843104 | 0.019800871 | 0.211743136 |
| pcaec362.pcaec360       | -0.009266316 | 0.007387675 | 0.211870974 |

|                                |              |             |             |
|--------------------------------|--------------|-------------|-------------|
| pcaac240.c18                   | 0.074479373  | 0.059403461 | 0.212054174 |
| lysopcac181.pcaec404           | 0.040187426  | 0.032053083 | 0.212058231 |
| lysopcac160.alanine            | -0.085473859 | 0.068192878 | 0.212190186 |
| pcaec360.pcaac426              | 0.096515581  | 0.077009918 | 0.212235736 |
| smohc241.pcaec362              | 0.048231029  | 0.038485302 | 0.212255774 |
| serotonin.prolinr              | -0.0352515   | 0.028129909 | 0.212279173 |
| pcaac405.lysopcac161           | -0.11296125  | 0.090143814 | 0.212295616 |
| smohc241.c51                   | 0.054954688  | 0.043860907 | 0.212365148 |
| pcaac362.serotonin             | -0.116585225 | 0.093057391 | 0.212401257 |
| pcaec341.lysopcac181           | 0.046085779  | 0.03678632  | 0.212413868 |
| asparagine.c101                | -0.032099689 | 0.025627865 | 0.212510387 |
| lysopcac203.pcaac300           | -0.062115773 | 0.049601847 | 0.212598713 |
| smc161.valine                  | -0.105837328 | 0.084517201 | 0.212609483 |
| pcaac342.pcaac360              | 0.032831446  | 0.026218808 | 0.21262696  |
| pcaec444.kynurenine            | 0.006743869  | 0.005386075 | 0.212669178 |
| asparagine.pcaac403            | -0.0028298   | 0.002260123 | 0.212683026 |
| lysopcac160.pcaec362           | 0.025969738  | 0.020745522 | 0.212767154 |
| pcaac385.smohc161              | -0.023784974 | 0.019004171 | 0.212860829 |
| methionine.transhydroxyproline | -0.034905751 | 0.027892313 | 0.212904094 |
| c0.pcaac403                    | 0.008879068  | 0.007096523 | 0.212999099 |
| smc241.pcaec444                | -0.14441254  | 0.115439794 | 0.213074961 |
| smc161.pcaac322                | -0.078254534 | 0.062561313 | 0.213122853 |
| pcaac281.pcaec342              | -0.205636647 | 0.164406307 | 0.213145501 |
| c3.c14                         | 0.022560945  | 0.018044247 | 0.213316855 |
| serine.pcaec424                | -0.008857959 | 0.007085391 | 0.213367885 |
| c102.pcaec424                  | -0.017667882 | 0.01413417  | 0.213426219 |
| pcaac420.serine                | -0.062251358 | 0.049804119 | 0.213458299 |
| citruline.c51dc                | -0.158717782 | 0.127012354 | 0.213567272 |
| pcaec361.pcaec423              | -0.007739882 | 0.006194069 | 0.213589602 |
| citruline.c101                 | 0.016118708  | 0.012901071 | 0.21364609  |
| asparticacid.pcaec364          | -0.010342513 | 0.008279804 | 0.213749293 |
| c2.glutamicacid                | -0.091996585 | 0.073655428 | 0.213790257 |
| c102.lysopcac180               | -0.09603849  | 0.076894628 | 0.213808739 |
| pcaec384.pcaac422              | -0.057996517 | 0.046438676 | 0.213837303 |
| c3.spermidine                  | -0.085725957 | 0.068659649 | 0.213954059 |
| pcaac344.pcaec340              | 0.071154419  | 0.05699212  | 0.213978917 |
| pcaac403.pcaac385              | -0.051412735 | 0.041180875 | 0.21399143  |
| lysopcac280.pcaec340           | -0.061385891 | 0.049176688 | 0.214060499 |
| citruline.smc181               | 0.022525208  | 0.018045735 | 0.214076276 |
| leucine.c16                    | -0.068443356 | 0.054840955 | 0.214147572 |
| lysopcac182.smohc221           | -0.047229049 | 0.037844256 | 0.214165463 |
| pcaec424.asparticacid          | 0.042732212  | 0.034247809 | 0.214256374 |
| pcaec446.glutamicacid          | 0.095756827  | 0.076762485 | 0.214363259 |

|                                |              |             |             |
|--------------------------------|--------------|-------------|-------------|
| citruline.tyrosine             | -0.065190643 | 0.052262931 | 0.214393919 |
| spermidine.alanine             | -0.113672718 | 0.091135871 | 0.214419741 |
| pcaac364.asparagine            | 0.015353941  | 0.012312682 | 0.214524363 |
| pcaec383.pcaec404              | 0.112507585  | 0.090232759 | 0.21457647  |
| pcaec380.pcaec405              | -0.129689142 | 0.104022612 | 0.214620241 |
| pcaac424.lysopcac204           | 0.135225945  | 0.108477882 | 0.214680115 |
| pcaac365.pcaec423              | -0.006198373 | 0.004972903 | 0.214733814 |
| pcaac405.lysopcac170           | 0.011985215  | 0.009616006 | 0.214751203 |
| pcaec360.pcaac425              | 0.131253466  | 0.105310857 | 0.214765355 |
| smc241.c12                     | 0.058408652  | 0.046864839 | 0.214773313 |
| acetylnithoine.pcaac422        | 0.081848816  | 0.065704418 | 0.214996159 |
| pcaec420.acetylnithoine        | -0.108685354 | 0.087249198 | 0.215004817 |
| pcaac380.isoleucine            | 0.048092612  | 0.0386127   | 0.21506929  |
| alanine.c14                    | 0.053766243  | 0.043180448 | 0.215201266 |
| pcaec360.asymmetricdimethylar  | 0.097702396  | 0.07847713  | 0.215264754 |
| pcaac424.pcaec424              | -0.060163387 | 0.048329691 | 0.21531081  |
| methionine.lysopcac280         | 0.013677608  | 0.010989535 | 0.215402644 |
| lysopcac180.pcaac381           | -0.043424924 | 0.034892484 | 0.21542752  |
| pcaec405.pcaec402              | -0.203120429 | 0.16321825  | 0.215450943 |
| kynurenine.methioninesulfoxide | 0.050976709  | 0.040962805 | 0.215453865 |
| citruiline.prolinr             | 0.022611925  | 0.018170668 | 0.215470098 |
| pcaec363.smohc161              | 0.018295415  | 0.014704309 | 0.215542613 |
| pcaec383.pcaac385              | -0.040463389 | 0.032523528 | 0.215577335 |
| arginine.pcaac362              | -0.103852402 | 0.08348181  | 0.215619287 |
| ornithine.pcaec403             | -0.049310657 | 0.039639171 | 0.215628177 |
| pcaec361.pcaac365              | -0.079831721 | 0.064178209 | 0.215657948 |
| pcaac300.spermidine            | -0.088846363 | 0.071431585 | 0.21569845  |
| glutamicacid.lysopcac204       | 0.077021983  | 0.061928496 | 0.215724939 |
| pcaac341.pcaec421              | 0.004297057  | 0.003455251 | 0.215759218 |
| pcaac425.pcaac380              | 0.092809486  | 0.074627872 | 0.215759476 |
| pcaec420.pcaac341              | 0.007893865  | 0.006347504 | 0.215764276 |
| smc161.pcaec404                | -0.011112316 | 0.008936135 | 0.215797795 |
| pcaac405.lysine                | 0.115685496  | 0.093035743 | 0.215824885 |
| pcaac240.pcaac344              | -0.101687117 | 0.0817883   | 0.215882    |
| smc180.pcaec382                | 0.012364343  | 0.009945455 | 0.215911849 |
| creatinine.spermidine          | 0.086876033  | 0.069880669 | 0.215915454 |
| lysine.c8                      | -0.06439698  | 0.051799516 | 0.21591875  |
| pcaac383.asparticacid          | 0.031196751  | 0.025094596 | 0.215929935 |
| smohc222.valine                | -0.125125437 | 0.100658828 | 0.215967172 |
| pcaac404.pcaec444              | 0.117564481  | 0.094576631 | 0.215968696 |
| c51dc.alphaaminoadipicacid     | 0.011846156  | 0.009529994 | 0.215976568 |
| pcaac424.pcaec380              | 0.113198324  | 0.091074135 | 0.216018476 |
| pcaac341.pcaec426              | 0.088148412  | 0.070925317 | 0.216051843 |

|                             |              |             |             |
|-----------------------------|--------------|-------------|-------------|
| pcaac421.pcaac340           | 0.073584712  | 0.059214204 | 0.216106002 |
| isoleucine.pcaac341         | 0.009751139  | 0.0078475   | 0.216145668 |
| pcaec362.pcaac406           | -0.055037465 | 0.044295424 | 0.216171357 |
| pcaac360.glycine            | 0.065524016  | 0.052744297 | 0.216249767 |
| pcaac402.pcaec342           | 0.122949405  | 0.098971898 | 0.216260778 |
| smc202.pcaec383             | -0.09972749  | 0.080282337 | 0.216281438 |
| pcaac403.pcaac341           | 0.008013942  | 0.006451448 | 0.216287629 |
| pcaec402.pcaac360           | -0.104965975 | 0.084504457 | 0.216308743 |
| lysine.alphaaminoadipicacid | -0.00731396  | 0.005888788 | 0.216353206 |
| pcaac404.creatinine         | -0.034146276 | 0.027492962 | 0.2163583   |
| pcaac424.pcaec342           | 0.124001468  | 0.09985481  | 0.216425597 |
| smc202.c141oh               | -0.104234166 | 0.083940661 | 0.216446765 |
| c5.pcaac341                 | 0.011417305  | 0.009195218 | 0.216484785 |
| smc202.smc180               | -0.043440382 | 0.034998098 | 0.216645109 |
| lysopcac181.c12             | 0.083942549  | 0.067631429 | 0.216661528 |
| pcaac281.asparagine         | 0.008450305  | 0.006808605 | 0.216681925 |
| pcaec424.smc240             | -0.051946674 | 0.041861968 | 0.216762005 |
| pcaec364.pcaec424           | -0.029479261 | 0.023763946 | 0.216909421 |
| pcaac426.serine             | -0.047195513 | 0.038051473 | 0.216981844 |
| pcaac362.pcaec342           | 0.155877263  | 0.125678024 | 0.216987956 |
| pcaac381.c182               | -0.07788805  | 0.062806251 | 0.217046345 |
| pcaec380.pcaec364           | -0.01381941  | 0.011143851 | 0.21706082  |
| methioninesulfoxide.c51dc   | 0.233193801  | 0.188054219 | 0.217082178 |
| c51dc.pcaac363              | -0.048969663 | 0.039496097 | 0.217146385 |
| pcaec424.pcaec300           | 0.018956815  | 0.015289689 | 0.217152925 |
| alphaaminoadipicacid.smc180 | -0.032297811 | 0.026050647 | 0.217165699 |
| serine.pcaac323             | -0.132549276 | 0.1069409   | 0.217293174 |
| pcaac383.smohc241           | 0.075813501  | 0.061171247 | 0.217329297 |
| smc160.pcaac406             | -0.053736249 | 0.043359713 | 0.217348543 |
| isoleucine.smc202           | 0.076438873  | 0.061704586 | 0.217542446 |
| smc260.pcaec361             | -0.008003721 | 0.006460933 | 0.217542647 |
| isoleucine.pcaac385         | 0.100537174  | 0.081168301 | 0.217602086 |
| c182.pcaac422               | 0.039989602  | 0.032289533 | 0.217659919 |
| pcaac343.alanine            | -0.02484346  | 0.020061893 | 0.217707487 |
| c14.pcaec363                | -0.026308648 | 0.021246195 | 0.217731508 |
| leucine.valine              | -0.113677579 | 0.091841299 | 0.217921765 |
| pcaac385.pcaec321           | -0.051898725 | 0.041934211 | 0.217972965 |
| kynurenine.smohc141         | -0.048973891 | 0.039572911 | 0.217995731 |
| pcaec361.smohc241           | 0.110168757  | 0.089048463 | 0.218137579 |
| pcaec341.c5                 | 0.011676767  | 0.009438275 | 0.218139718 |
| c182.pcaec380               | -0.06014698  | 0.048621467 | 0.218186336 |
| lysopcac170.pcaec444        | -0.111902009 | 0.09046866  | 0.218234872 |
| methionine.pcaac361         | 0.051944483  | 0.041998112 | 0.218266566 |

|                                  |              |             |             |
|----------------------------------|--------------|-------------|-------------|
| pcaac320.pcaac403                | -0.034759794 | 0.028107374 | 0.218322157 |
| lysopcac203.pcaac320             | -0.068496046 | 0.055389405 | 0.218341268 |
| pcaec301.smc240                  | -0.037662837 | 0.030458721 | 0.218380731 |
| pcaac406.pcaec363                | -0.039095642 | 0.031618662 | 0.21839814  |
| acetylmethionine.c141oh          | 0.121320807  | 0.098125765 | 0.218432537 |
| pcaec420.smc160                  | -0.082084852 | 0.066395556 | 0.218462297 |
| pcaec420.pcaec424                | 0.007092373  | 0.00573696  | 0.218477308 |
| phenylalanine.pcaec404           | -0.034838181 | 0.028185049 | 0.21855439  |
| lysopcac280.citruline            | -0.031311808 | 0.025332968 | 0.218569786 |
| smc161.arginine                  | 0.077981708  | 0.063102624 | 0.218650732 |
| putrescine.c2                    | 0.061224588  | 0.049547789 | 0.218696854 |
| c51.smc160                       | 0.103209746  | 0.083541344 | 0.218783707 |
| citruline.pcaac344               | -0.07637697  | 0.06182294  | 0.218790544 |
| creatinine.pcaac281              | -0.004455285 | 0.003606603 | 0.218828049 |
| lysopcac170.c12                  | 0.069438433  | 0.056216976 | 0.218875288 |
| pcaac361.smohc141                | -0.02512115  | 0.020349857 | 0.219143575 |
| c16.pcaec401                     | -0.06370842  | 0.05161124  | 0.219170599 |
| pcaec421.lysopcac161             | 0.122916668  | 0.099599622 | 0.219275558 |
| pcaec343.pcaec363                | -0.087850136 | 0.07119384  | 0.219331573 |
| methioninesulfoxide.pcaac300     | -0.096762401 | 0.078417656 | 0.219339215 |
| c0.pcaac362                      | -0.042363534 | 0.034332249 | 0.219342227 |
| pcaec423.pcaac405                | -0.072183568 | 0.058502381 | 0.219368743 |
| glutamine.pcaec322               | 0.054343548  | 0.044049238 | 0.219427024 |
| c0.pcaac420                      | 0.051674639  | 0.041887421 | 0.219443661 |
| pcaac405.h1                      | 0.002220951  | 0.001801285 | 0.219694196 |
| pcaac322.lysopcac204             | -0.044704587 | 0.036264982 | 0.219791247 |
| pcaec445.pcaec424                | 0.032706746  | 0.026534507 | 0.219831695 |
| pcaac384.c51dc                   | -0.141931115 | 0.11515788  | 0.21987643  |
| pcaec364.pcaec443                | -0.071413485 | 0.057945558 | 0.219901646 |
| smohc161.phenylalanine           | 0.063053397  | 0.051165948 | 0.219936092 |
| c0.pcaac322                      | -0.072391036 | 0.058744535 | 0.21994681  |
| c162.pcaec301                    | 0.102000393  | 0.082803582 | 0.220120679 |
| alphaaminoadipicacid.lysopcac204 | -0.011325802 | 0.009197079 | 0.220261901 |
| pcaac320.smc161                  | -0.063954536 | 0.051934495 | 0.220265716 |
| h1.phenylalanine                 | -0.08243376  | 0.066948354 | 0.22031879  |
| c101.pcaac406                    | 0.035481555  | 0.028818638 | 0.22035683  |
| leucine.pcaac281                 | -0.004260034 | 0.003460427 | 0.220405265 |
| pcaec380.pcaac405                | -0.069685788 | 0.056608931 | 0.220430746 |
| methioninesulfoxide.pcaac322     | 0.060026907  | 0.048766145 | 0.220464257 |
| pcaec340.smohc141                | -0.059777178 | 0.048564079 | 0.220471967 |
| pcaac404.pcaec382                | 0.007962475  | 0.006469305 | 0.220503491 |
| pcaec443.pcaec404                | 0.059320619  | 0.048209311 | 0.220625747 |
| citruline.c3                     | -0.040141042 | 0.032626466 | 0.22068509  |



|                                 |              |             |             |
|---------------------------------|--------------|-------------|-------------|
| pcaac425.pcaac281               | 0.006111047  | 0.004967424 | 0.22072129  |
| smc161.pcaec322                 | 0.123093843  | 0.100058128 | 0.220721728 |
| pcaec300.pcaac341               | -0.008521859 | 0.00692755  | 0.220752697 |
| lysopcac203.pcaac321            | -0.051692859 | 0.042022706 | 0.220761283 |
| alanine.pcaec404                | -0.036526691 | 0.029695682 | 0.220792473 |
| pcaec422.pcaec340               | -0.078417701 | 0.063755847 | 0.220816736 |
| pcaac406.pcaec402               | 0.046464122  | 0.037779565 | 0.220851935 |
| smohc161.pcaec361               | -0.02251215  | 0.018304882 | 0.220863294 |
| c51.pcaac361                    | -0.108403651 | 0.088146597 | 0.220875653 |
| c12.pcaec424                    | -0.01035675  | 0.008421792 | 0.220896141 |
| c141oh.c51                      | 0.047749008  | 0.038830648 | 0.220927077 |
| pcaac420.pcaec423               | -0.011804082 | 0.009600019 | 0.220958404 |
| smohc222.kynurenine             | -0.005261148 | 0.004279774 | 0.221064528 |
| pcaec364.smohc221               | 0.045323203  | 0.036869566 | 0.221072114 |
| c102.c2                         | 0.113255479  | 0.092141981 | 0.221125929 |
| ornithine.pcaec404              | -0.054534567 | 0.044371834 | 0.221165261 |
| pcaec301.pcaec405               | -0.069159459 | 0.056290652 | 0.22132305  |
| pcaac362.c16                    | 0.055538292  | 0.045206219 | 0.221345237 |
| isoleucine.pcaac344             | -0.090659757 | 0.073799023 | 0.221377389 |
| pcaac362.alphaaminoadipicacid   | 0.010164513  | 0.008274413 | 0.221392762 |
| pcaac405.smohc141               | -0.017125382 | 0.013941224 | 0.22140338  |
| pcaec443.pcaec406               | 0.036108469  | 0.029396224 | 0.221426484 |
| pcaec322.pcaac366               | 0.071544829  | 0.058260946 | 0.22155007  |
| h1.asymmetricdimethylarginine   | 0.035653043  | 0.029035136 | 0.221579681 |
| pcaac380.pcaec423               | -0.005014106 | 0.00408377  | 0.221622524 |
| arginine.alanine                | -0.062069914 | 0.050558692 | 0.221672187 |
| citruline.ornithine             | -0.058445476 | 0.047607997 | 0.22168735  |
| smc180.c16                      | 0.06835346   | 0.055684057 | 0.221731108 |
| pcaec384.c51                    | 0.035535578  | 0.028966363 | 0.222006548 |
| pcaac361.pcaac406               | -0.057029217 | 0.046489666 | 0.222036645 |
| lysopcac160.valine              | -0.051326657 | 0.041842931 | 0.222057923 |
| pcaec406.pcaec424               | 0.008808884  | 0.007181289 | 0.22206046  |
| lysopcac204.pcaec424            | 0.007766125  | 0.006331512 | 0.222083292 |
| pcaec446.c142                   | 0.051132255  | 0.041686976 | 0.222085797 |
| pcaec340.pcaac341               | -0.023778375 | 0.019386091 | 0.222088586 |
| pcaec360.prolinr                | -0.04902374  | 0.039968885 | 0.222096537 |
| serotonin.pcaec360              | -0.014795649 | 0.012063308 | 0.222114318 |
| lysopcac181.lysopcac280         | 0.01756913   | 0.014325389 | 0.222139483 |
| lysopcac170.pcaec424            | 0.006366344  | 0.005191532 | 0.222191676 |
| histidine.asymmetricdimethylarg | 0.020590215  | 0.016792398 | 0.222240784 |
| pcaac321.spermidine             | -0.087342593 | 0.071245211 | 0.222323135 |
| glutamine.kynurenine            | -0.019243878 | 0.015698124 | 0.222350198 |
| pcaec385.c142                   | -0.064419462 | 0.052554553 | 0.222390541 |

|                               |              |             |             |
|-------------------------------|--------------|-------------|-------------|
| glutamicacid.pcaec422         | -0.097346621 | 0.07942161  | 0.222416547 |
| smc260.smohc221               | -0.05341063  | 0.043588338 | 0.222548731 |
| c141.pcaec424                 | -0.016477503 | 0.013448413 | 0.222587953 |
| serine.lysopcac182            | -0.032543056 | 0.026570255 | 0.222755066 |
| methionine.pcaec424           | -0.016785969 | 0.013707202 | 0.222823962 |
| pcaac321.pcaec340             | 0.10918882   | 0.08917536  | 0.222892083 |
| pcaac385.pcaec423             | -0.005717899 | 0.004669858 | 0.222892677 |
| histidine.pcaec383            | -0.068119724 | 0.055637086 | 0.222918362 |
| pcaac364.pcaac320             | 0.121778494  | 0.099471137 | 0.222955432 |
| lysine.smohc141               | -0.055388152 | 0.045243794 | 0.222972019 |
| c8.pcaac425                   | -0.105181736 | 0.085928211 | 0.223028506 |
| pcaac365.pcaec405             | -0.06629773  | 0.054162791 | 0.22303586  |
| pcaec360.lysopcac180          | -0.056514815 | 0.046180802 | 0.223138436 |
| pcaec360.pcaec405             | 0.119851911  | 0.097937227 | 0.223142331 |
| pcaec300.c181                 | -0.018271522 | 0.014932802 | 0.223209877 |
| pcaac323.pcaac281             | 0.002367256  | 0.001934838 | 0.223244551 |
| c4.pcaec382                   | -0.022427238 | 0.018333351 | 0.223315339 |
| acetylmithoine.asparticacid   | 0.018475143  | 0.015105011 | 0.223386548 |
| c51dc.methioninesulfoxide     | 0.046865137  | 0.038316862 | 0.223393781 |
| pcaac366.pcaec240             | -0.032336629 | 0.026438512 | 0.223396134 |
| pcaec342.pcaac363             | -0.032724125 | 0.02675545  | 0.22339821  |
| smc260.lysopcac181            | 0.031191727  | 0.025502856 | 0.223403692 |
| pcaac344.c2                   | -0.095220466 | 0.077859506 | 0.223437565 |
| pcaac341.smc161               | -0.05546953  | 0.045357834 | 0.223455037 |
| pcaac322.lysine               | -0.08631005  | 0.07058133  | 0.223487533 |
| arginine.pcaec385             | 0.049985077  | 0.040877568 | 0.223504727 |
| pcaec404.smc240               | -0.047556225 | 0.03889142  | 0.223506572 |
| pcaec385.c141oh               | -0.160961469 | 0.131653852 | 0.223575723 |
| pcaac365.pcaac402             | -0.104701237 | 0.085642305 | 0.223602119 |
| pcaec406.lysopcac160          | 0.102081727  | 0.083501873 | 0.2236145   |
| alphaaminoadipicacid.pcaac363 | 0.03286506   | 0.026888206 | 0.223698473 |
| pcaec360.pcaac320             | 0.068083506  | 0.055703103 | 0.223709172 |
| pcaac320.pcaac381             | 0.061863735  | 0.050615907 | 0.223723386 |
| prolinr.smohc141              | -0.024899697 | 0.020378385 | 0.223855771 |
| pcaec420.pcaec406             | 0.023384452  | 0.019138748 | 0.223867032 |
| methioninesulfoxide.pcaec405  | -0.163043003 | 0.133442137 | 0.22387181  |
| creatinine.c101               | -0.016660607 | 0.013636937 | 0.22390912  |
| smc261.c181                   | 0.027077937  | 0.022163902 | 0.223914051 |
| c102.spermidine               | -0.092041938 | 0.075344498 | 0.22395133  |
| c141oh.pcaec403               | 0.085358409  | 0.069875354 | 0.223963977 |
| pcaec403.c181                 | 0.042232304  | 0.034572792 | 0.223976683 |
| prolinr.alphaaminoadipicacid  | 0.017791559  | 0.014568331 | 0.224089235 |
| pcaec445.phenylalanine        | 0.073614988  | 0.060279285 | 0.224095671 |

|                                |              |             |             |
|--------------------------------|--------------|-------------|-------------|
| pcaec406.pcaec423              | -0.00710607  | 0.005820915 | 0.224265412 |
| c2.pcaac403                    | 0.007051389  | 0.005776557 | 0.224299979 |
| ornithine.pcaec361             | -0.021570034 | 0.017670689 | 0.224308733 |
| c51.smohc141                   | -0.012795889 | 0.010484416 | 0.22438424  |
| pcaec401.pcaec423              | -0.050649979 | 0.041504892 | 0.22443331  |
| pcaec341.smohc141              | -0.049346026 | 0.040444363 | 0.224524379 |
| pcaac363.transhydroxyproline   | 0.024190515  | 0.019827963 | 0.224553209 |
| acetylmithoine.pcaac322        | 0.086111381  | 0.070598608 | 0.224662128 |
| pcaec425.pcaac422              | -0.035063776 | 0.02874821  | 0.224679689 |
| c10.pcaec342                   | 0.084532539  | 0.069314289 | 0.224729306 |
| pcaec381.kynurenine            | 0.016520192  | 0.013546116 | 0.224730192 |
| lysopcac281.pcaac405           | 0.106078155  | 0.086984212 | 0.224745884 |
| pcaec361.c141oh                | -0.113817793 | 0.093332887 | 0.224756564 |
| c182.smohc221                  | 0.021400051  | 0.017550221 | 0.224802481 |
| pcaac364.pcaac403              | -0.005992341 | 0.004915371 | 0.224900194 |
| smc181.pcaec404                | -0.011959925 | 0.009811856 | 0.224967011 |
| lysopcac281.pcaac422           | -0.018119341 | 0.014866084 | 0.225000418 |
| pcaac300.smohc141              | -0.04277079  | 0.035096468 | 0.22506622  |
| putrescine.asymmetricdimethyla | 0.018112255  | 0.014862592 | 0.225072475 |
| pcaec405.serotonin             | -0.147447431 | 0.121032204 | 0.225222977 |
| pcaac321.pcaec421              | 0.013327785  | 0.010940942 | 0.225258021 |
| alphaaminoadipicacid.c101      | 0.008845948  | 0.007262104 | 0.225280717 |
| smohc141.pcaec443              | -0.098461244 | 0.080834028 | 0.225292204 |
| pcaec401.pcaac426              | -0.114722178 | 0.09419814  | 0.225362362 |
| pcaac404.pcaec406              | 0.014883646  | 0.01222116  | 0.225371034 |
| serotonin.pcaec443             | -0.087728462 | 0.07204452  | 0.225431943 |
| pcaac323.pcaec421              | 0.002159879  | 0.001773885 | 0.225469722 |
| c2.putrescine                  | -0.050853583 | 0.041766993 | 0.225486355 |
| pcaec365.spermidine            | -0.082916403 | 0.068130219 | 0.225685792 |
| creatinine.pcaec424            | 0.006037607  | 0.004960989 | 0.225690116 |
| putrescine.pcaec422            | -0.038892515 | 0.031960346 | 0.225734804 |
| smc160.pcaac362                | -0.018916579 | 0.015546055 | 0.225768972 |
| pcaac425.lysopcac204           | 0.070955223  | 0.058312596 | 0.225769408 |
| pcaac323.pcaec301              | 0.085880868  | 0.070582897 | 0.225796027 |
| pcaec446.pcaac341              | 0.005560664  | 0.004571298 | 0.225912747 |
| pcaac380.lysopcac181           | 0.033416762  | 0.027473079 | 0.225944748 |
| pcaac320.pcaec363              | -0.039812426 | 0.032739696 | 0.226064913 |
| pcaec322.kynurenine            | -0.008933999 | 0.007346973 | 0.22607187  |
| pcaec361.pcaac402              | -0.090814368 | 0.074699842 | 0.226180927 |
| pcaac362.alanine               | -0.048885874 | 0.04021169  | 0.226184994 |
| c18.phenylalanine              | 0.065585933  | 0.053950212 | 0.226199361 |
| methioninesulfoxide.pcaac383   | 0.021395877  | 0.017600609 | 0.226215475 |
| smohc241.pcaac341              | 0.007479382  | 0.006153299 | 0.226262989 |

|                              |              |             |             |
|------------------------------|--------------|-------------|-------------|
| smc160.c51                   | 0.069945615  | 0.057556864 | 0.226363312 |
| smohc241.pcaac406            | -0.078036812 | 0.064219899 | 0.226398903 |
| pcaac300.asparticacid        | -0.051229862 | 0.042159671 | 0.226403086 |
| pcaac320.isoleucine          | 0.040501942  | 0.033337135 | 0.226486457 |
| lysopcac182.pcaec423         | -0.054127642 | 0.044552493 | 0.226486973 |
| c0.pcaec405                  | -0.061471324 | 0.050599929 | 0.226512969 |
| pcaac361.pcaac422            | -0.023716056 | 0.019522185 | 0.226522129 |
| pcaec383.pcaac341            | 0.018600123  | 0.015311736 | 0.226546243 |
| pcaec361.lysopcac204         | -0.058234306 | 0.047939275 | 0.226550423 |
| c182.c5                      | -0.012001473 | 0.009879795 | 0.226551295 |
| lysopcac281.pcaac406         | -0.049897626 | 0.041077764 | 0.22656569  |
| lysopcac203.c12              | 0.10699043   | 0.088082861 | 0.226586503 |
| pcaac341.pcaac363            | -0.016711223 | 0.013759308 | 0.226631051 |
| pcaac240.pcaac383            | 0.008910703  | 0.007336999 | 0.226650359 |
| smohc221.pcaac344            | -0.083096059 | 0.068422148 | 0.226660757 |
| lysopcac161.c3               | -0.081271975 | 0.066928357 | 0.226717217 |
| kynurenine.pcaec363          | -0.035829906 | 0.029510643 | 0.226784935 |
| lysopcac180.c18              | -0.059870398 | 0.049318398 | 0.22685283  |
| pcaec386.pcaac383            | 0.008952712  | 0.007375532 | 0.226897423 |
| pcaec362.pcaec423            | -0.01659771  | 0.013674589 | 0.226926555 |
| methioninesulfoxide.smohc221 | -0.071635289 | 0.05901951  | 0.226929192 |
| c14.c51                      | 0.040595074  | 0.033447513 | 0.226952498 |
| smc161.pcaac403              | -0.005293011 | 0.00436182  | 0.227031693 |
| pcaac383.valine              | -0.088929437 | 0.073284814 | 0.227035463 |
| pcaec343.lysopcac204         | -0.031785559 | 0.026204073 | 0.227216918 |
| glutamicacid.smohc141        | -0.023966944 | 0.019758484 | 0.227219048 |
| lysopcac180.pcaec424         | 0.005069504  | 0.004179563 | 0.227245116 |
| pcaec443.pcaac363            | -0.023716299 | 0.019553701 | 0.227262814 |
| smohc141.taurine             | 0.075118998  | 0.06194528  | 0.227344112 |
| c182.alanine                 | 0.023080645  | 0.019033919 | 0.227367362 |
| citruline.pcaec424           | -0.004560227 | 0.003760818 | 0.227383952 |
| asparagine.lysopcac140       | 0.028736232  | 0.023699746 | 0.227403137 |
| pcaec423.lysopcac161         | 0.114137366  | 0.094136538 | 0.227420704 |
| c18.c51                      | 0.052937538  | 0.043663253 | 0.227444089 |
| smc261.pcaec424              | 0.009604708  | 0.007923221 | 0.22751358  |
| glutamicacid.c10             | 0.071110916  | 0.058663427 | 0.227527995 |
| pcaec444.pcaec383            | -0.052497485 | 0.043309602 | 0.227543476 |
| isoleucine.pcaac281          | -0.005027541 | 0.004147806 | 0.227561714 |
| pcaec420.pcaac383            | 0.009302724  | 0.007676963 | 0.227685764 |
| pcaec386.h1                  | 0.00366053   | 0.003021046 | 0.227722012 |
| asparticacid.kynurenine      | -0.014143493 | 0.011672685 | 0.227722794 |
| pcaec422.pcaac383            | 0.013551496  | 0.011184845 | 0.2277533   |
| pcaac365.pcaac421            | -0.065276995 | 0.053888976 | 0.22785665  |

|                              |              |             |             |
|------------------------------|--------------|-------------|-------------|
| pcaac386.smc180              | 0.034340582  | 0.028349661 | 0.227857121 |
| c51.pcaec363                 | -0.020884409 | 0.017243667 | 0.227928725 |
| pcaac425.pcaec364            | -0.013147414 | 0.010855864 | 0.227946417 |
| pcaec446.smc180              | 0.024787896  | 0.020473491 | 0.22808297  |
| pcaac404.smohc141            | -0.017683935 | 0.014607151 | 0.228119576 |
| c102.pcaec421                | -0.007446939 | 0.006151486 | 0.228136217 |
| glutamicacid.pcaac360        | 0.087773008  | 0.072508254 | 0.228162048 |
| lysopcac280.pcaec383         | -0.126217389 | 0.104280503 | 0.228223265 |
| pcaac281.pcaac341            | 0.024844475  | 0.020527959 | 0.228257399 |
| smc240.creatinine            | -0.010676508 | 0.008822731 | 0.228319075 |
| pcaac342.pcaac403            | -0.00433508  | 0.003582721 | 0.228363805 |
| acetylmithoine.pcaec364      | 0.044109091  | 0.036462697 | 0.228475548 |
| pcaac425.pcaac341            | 0.00821306   | 0.00678948  | 0.228487071 |
| pcaac406.lysopcac161         | -0.108783282 | 0.089929069 | 0.228493947 |
| asparticacid.lysopcac204     | 0.060998508  | 0.050440633 | 0.228625446 |
| pcaec422.c182                | -0.032452209 | 0.026835324 | 0.228626792 |
| smohc161.taurine             | 0.075389953  | 0.062350455 | 0.228694554 |
| pcaec422.asparticacid        | 0.040333866  | 0.033365684 | 0.22880546  |
| pcaac240.lysopcac161         | 0.102733494  | 0.084987652 | 0.228819943 |
| pcaec424.lysopcac161         | 0.072526041  | 0.060006497 | 0.22888448  |
| pcaec401.smohc222            | 0.009636237  | 0.007974708 | 0.228994311 |
| pcaac404.c5                  | 0.014290745  | 0.011826663 | 0.228994356 |
| pcaec341.c101                | -0.007373648 | 0.006103417 | 0.229083154 |
| pcaec381.pcaec406            | 0.024477367  | 0.020268474 | 0.229259882 |
| pcaac405.transhydroxyproline | 0.048254554  | 0.039958425 | 0.229274504 |
| pcaac402.pcaec383            | 0.011482428  | 0.0095086   | 0.229288164 |
| pcaac380.pcaec406            | -0.024349185 | 0.020165774 | 0.229338945 |
| pcaac240.c51dc               | 0.16831585   | 0.139412915 | 0.229389634 |
| pcaec380.c181                | -0.033715963 | 0.027927553 | 0.229410237 |
| pcaac386.pcaec424            | 0.004486064  | 0.0037159   | 0.22941152  |
| asparticacid.pcaac320        | 0.058111191  | 0.048135253 | 0.229416826 |
| pcaac343.pcaec383            | -0.097039585 | 0.080382084 | 0.229424132 |
| c0.c2                        | 0.097016342  | 0.080367636 | 0.229451831 |
| pcaac384.pcaec343            | -0.096025209 | 0.079552589 | 0.229486779 |
| pcaec381.pcaac384            | 0.078612313  | 0.065131013 | 0.229516865 |
| creatinine.histidine         | -0.067041875 | 0.055551306 | 0.22957112  |
| serine.pcaec444              | -0.162314555 | 0.134499072 | 0.229585748 |
| prolinr.pcaac366             | 0.035583986  | 0.029486848 | 0.229598478 |
| c18.histidine                | -0.066522239 | 0.055124646 | 0.229604023 |
| pcaac426.pcaac383            | 0.01095282   | 0.009076336 | 0.229610057 |
| pcaac362.pcaec365            | 0.030241813  | 0.02506166  | 0.229628625 |
| pcaec422.pcaac322            | -0.098841783 | 0.081911073 | 0.229628654 |
| pcaac381.pcaac363            | -0.034719065 | 0.028773671 | 0.229655556 |

|                                |              |             |             |
|--------------------------------|--------------|-------------|-------------|
| c10.pcaec443                   | -0.083202097 | 0.068960698 | 0.229698364 |
| pcaac403.lysopcac161           | 0.095823617  | 0.079421986 | 0.229699231 |
| lysopcac204.asymmetricdimethy  | 0.028902558  | 0.023960435 | 0.229795525 |
| pcaec421.c141                  | 0.083592865  | 0.069300249 | 0.229803164 |
| lysopcac281.lysopcac204        | -0.022661655 | 0.01879125  | 0.229908243 |
| pcaac424.pcaac341              | 0.011363206  | 0.009422588 | 0.229913883 |
| histidine.pcaac300             | -0.070935031 | 0.058846774 | 0.230119418 |
| pcaac383.pcaec360              | -0.007086753 | 0.005879146 | 0.230124828 |
| smohc141.tyrosine              | -0.087298388 | 0.072425573 | 0.230144841 |
| lysopcac170.pcaec443           | 0.078549693  | 0.065171482 | 0.230174075 |
| pcaac362.c102                  | 0.057180785  | 0.047442725 | 0.230180919 |
| pcaac361.c16                   | 0.047191236  | 0.039161214 | 0.230261284 |
| pcaec403.pcaac385              | -0.038357122 | 0.031831375 | 0.230276866 |
| lysopcac182.pcaec360           | -0.013347919 | 0.011078069 | 0.230320777 |
| c0.smohc221                    | 0.037178893  | 0.030857179 | 0.230330651 |
| prolinr.lysopcac203            | 0.025055393  | 0.020795334 | 0.230335884 |
| pcaec385.pcaac381              | 0.04503221   | 0.037376982 | 0.23035329  |
| pcaec321.pcaec382              | 0.025883445  | 0.021483545 | 0.230356375 |
| pcaac363.alanine               | -0.029330181 | 0.024348133 | 0.230427964 |
| pcaec424.pcaec401              | 0.08493637   | 0.070518848 | 0.230492679 |
| smc241.pcaac361                | 0.085978106  | 0.071387994 | 0.230520225 |
| pcaac300.pcaac383              | 0.007566324  | 0.006282911 | 0.2305615   |
| lysine.leucine                 | -0.033894289 | 0.028146723 | 0.230588573 |
| pcaac381.lysopcac181           | 0.043361062  | 0.036013215 | 0.230653368 |
| pcaec383.pcaec443              | -0.182139295 | 0.151283698 | 0.230681669 |
| pcaac422.pcaac383              | 0.015072176  | 0.012520668 | 0.230749022 |
| pcaec321.pcaec424              | 0.009929662  | 0.008250003 | 0.230821754 |
| smc240.pcaec406                | 0.011795154  | 0.009800151 | 0.230831925 |
| pcaec300.pcaac365              | -0.073189033 | 0.060811234 | 0.230841173 |
| c181.pcaac385                  | 0.051272497  | 0.042610038 | 0.230936926 |
| pcaec403.pcaec405              | -0.224256649 | 0.186388859 | 0.230987321 |
| c142.pcaac425                  | -0.079675155 | 0.066226176 | 0.231021661 |
| pcaec365.pcaec383              | 0.082497024  | 0.068574278 | 0.231038971 |
| c182.lysopcac161               | -0.115606367 | 0.096097226 | 0.231045522 |
| pcaac365.pcaec362              | -0.070071076 | 0.058247118 | 0.23105253  |
| smohc241.pcaac344              | -0.084136974 | 0.069948595 | 0.231112841 |
| pcaac361.pcaac383              | 0.009062072  | 0.007535279 | 0.231198018 |
| glutamicacid.pcaac322          | 0.052754153  | 0.043869909 | 0.231238897 |
| pcaac341.putrescine            | -0.042677299 | 0.035490085 | 0.231238931 |
| c16.pcaac422                   | 0.040543152  | 0.033719106 | 0.231290687 |
| pcaec343.alphaaminoadipicacid  | -0.013688597 | 0.011385227 | 0.231316575 |
| pcaac385.asymmetricdimethylar; | 0.025844347  | 0.021495723 | 0.231320562 |
| kynurenine.pcaec361            | -0.009106145 | 0.007574562 | 0.231359519 |

|                              |              |             |             |
|------------------------------|--------------|-------------|-------------|
| pcaac401.pcaac383            | 0.012223987  | 0.010168023 | 0.231360285 |
| ornithine.pcaec423           | -0.005388834 | 0.004482674 | 0.231380253 |
| pcaac386.pcaec444            | 0.195191694  | 0.162378619 | 0.231407145 |
| smc260.smc241                | -0.138404428 | 0.115154016 | 0.23147298  |
| smc260.pcaac344              | -0.077403659 | 0.064401953 | 0.231482004 |
| pcaac363.pcaac403            | -0.008313057 | 0.006917209 | 0.231516837 |
| c12.pcaec363                 | -0.022733068 | 0.018916461 | 0.231529344 |
| smc160.pcaac384              | 0.070216938  | 0.05843145  | 0.231553865 |
| smc161.pcaec423              | -0.011051479 | 0.009196718 | 0.231562088 |
| pcaac341.pcaac383            | 0.007575001  | 0.00630472  | 0.231637616 |
| lysopcac181.pcaec424         | 0.009127163  | 0.007596888 | 0.231655585 |
| ornithine.c51dc              | 0.136894685  | 0.11395244  | 0.231695254 |
| c5.smohc141                  | -0.024405442 | 0.020320028 | 0.231802774 |
| lysopcac170.pcaec360         | -0.007764181 | 0.006464971 | 0.23183836  |
| methionine.pcaac383          | 0.006903973  | 0.005748705 | 0.231838388 |
| pcaac422.smc241              | -0.073016395 | 0.060810083 | 0.231928511 |
| pcaec300.transhydroxyproline | 0.041735929  | 0.034758972 | 0.23193026  |
| lysopcac140.smc181           | -0.044685007 | 0.037216822 | 0.231952309 |
| pcaec424.smohc241            | 0.086053794  | 0.071677986 | 0.231993273 |
| c5.c18                       | -0.135162452 | 0.112592073 | 0.232031753 |
| pcaec421.c181                | -0.021808844 | 0.018168415 | 0.232066666 |
| pcaac421.pcaac383            | 0.007288996  | 0.006072333 | 0.232070364 |
| phenylalanine.pcaac365       | -0.067760266 | 0.056461097 | 0.232162722 |
| c181.pcaac300                | 0.037165283  | 0.030970438 | 0.232200898 |
| pcaec406.serotonin           | -0.167630918 | 0.139695341 | 0.232220033 |
| pcaec405.c101                | 0.027243191  | 0.022703202 | 0.232221476 |
| pcaec424.pcaec380            | 0.09402415   | 0.078356036 | 0.232225643 |
| methioninesulfoxide.pcaac341 | 0.013023824  | 0.01085403  | 0.232246444 |
| pcaec365.pcaac383            | 0.006444874  | 0.005371466 | 0.232274172 |
| serotonin.pcaac341           | 0.005156882  | 0.004298164 | 0.232292759 |
| ornithine.c51                | 0.049986503  | 0.041666121 | 0.232329689 |
| pcaec365.lysopcac180         | 0.095504064  | 0.079609846 | 0.232345324 |
| smohc141.c141oh              | -0.118304643 | 0.098628253 | 0.23240375  |
| lysopcac161.pcaac344         | 0.073067239  | 0.060919375 | 0.232439259 |
| pcaec386.pcaec402            | 0.063204289  | 0.052700988 | 0.232481476 |
| pcaec403.pcaac363            | -0.035271011 | 0.029412893 | 0.232532447 |
| c16.c3                       | 0.106726391  | 0.089002726 | 0.232544901 |
| arginine.serotonin           | 0.143129693  | 0.119363832 | 0.232557237 |
| pcaec363.c182                | -0.064268547 | 0.05359896  | 0.232573151 |
| c8.methioninesulfoxide       | 0.019208015  | 0.016022787 | 0.232677693 |
| pcaac424.creatinine          | -0.023787598 | 0.019845834 | 0.232745304 |
| creatinine.pcaec363          | 0.023413333  | 0.019536203 | 0.232807525 |
| smohc221.smohc161            | 0.046861682  | 0.039101831 | 0.232809993 |

|                                 |              |             |             |
|---------------------------------|--------------|-------------|-------------|
| lysine.smc202                   | 0.065517237  | 0.054673617 | 0.232856023 |
| c181.pcaec380                   | -0.03976371  | 0.033183511 | 0.232870154 |
| pcaec445.c142                   | 0.036989722  | 0.030869028 | 0.232877067 |
| smohc241.pcaac383               | 0.008828933  | 0.007368158 | 0.232886505 |
| pcaec360.pcaac381               | 0.0531492    | 0.044357066 | 0.232902946 |
| leucine.c51dc                   | -0.204128889 | 0.170412904 | 0.233044158 |
| lysopcac280.serotonin           | -0.153821382 | 0.12842971  | 0.233098521 |
| ornithine.pcaec342              | -0.084993348 | 0.070971089 | 0.233149631 |
| pcaac425.creatinine             | -0.026906611 | 0.02246815  | 0.233162243 |
| pcaec343.tyrosine               | -0.07205127  | 0.060171234 | 0.233203951 |
| pcaec403.smohc221               | -0.09354411  | 0.078120737 | 0.233206739 |
| pcaac426.alanine                | -0.025931036 | 0.021657056 | 0.233238499 |
| lysopcac281.transhydroxyprolin  | 0.042696139  | 0.035659353 | 0.233244176 |
| smc260.pcaac386                 | 0.037233443  | 0.031097732 | 0.2332556   |
| c16.pcaec340                    | 0.0894802    | 0.07473731  | 0.233271657 |
| pcaac380.pcaec362               | 0.019545539  | 0.016325649 | 0.233284815 |
| c4.pcaac422                     | 0.049370327  | 0.041257981 | 0.233519487 |
| pcaac401.c51                    | 0.142735274  | 0.119291408 | 0.233557911 |
| c10.c141                        | 0.084083362  | 0.070273118 | 0.233559312 |
| phenylalanine.smohc141          | -0.01912157  | 0.015981715 | 0.233581455 |
| leucine.c2                      | 0.053962732  | 0.045104839 | 0.233612912 |
| pcaac381.pcaec424               | 0.006039573  | 0.005048597 | 0.233650656 |
| pcaac420.smohc241               | 0.076203659  | 0.063703291 | 0.233673785 |
| pcaac320.lysopcac180            | -0.062658427 | 0.052385031 | 0.233718414 |
| pcaac426.pcaec382               | 0.010836799  | 0.009060129 | 0.233724445 |
| putrescine.pcaac320             | -0.023558615 | 0.019697374 | 0.233751476 |
| c51dc.pcaec362                  | -0.033755009 | 0.028227238 | 0.233828147 |
| pcaac426.pcaec406               | 0.014698826  | 0.012294013 | 0.233914788 |
| smohc221.creatinine             | -0.008968883 | 0.007502611 | 0.233982278 |
| kynurenine.valine               | 0.106865834  | 0.089396133 | 0.23398851  |
| pcaac380.pcaec424               | 0.00807897   | 0.006758379 | 0.233995687 |
| alphaaminoadipicacid.asparagine | 0.012168907  | 0.010180333 | 0.234021236 |
| smohc221.alanine                | -0.046797503 | 0.039154294 | 0.234070861 |
| pcaec446.pcaac366               | 0.093441877  | 0.078194576 | 0.234154814 |
| lysopcac161.lysopcac160         | -0.03150766  | 0.026367705 | 0.234177436 |
| c4.pcaac322                     | -0.113209513 | 0.094752024 | 0.234230362 |
| pcaac320.c142                   | 0.032025256  | 0.026808336 | 0.234307172 |
| pcaac384.smc240                 | -0.041208787 | 0.034496442 | 0.234314906 |
| pcaac360.pcaec423               | -0.00551486  | 0.00461659  | 0.23431747  |
| kynurenine.spermidine           | 0.098331298  | 0.082316155 | 0.234324372 |
| pcaec341.pcaec423               | -0.007478487 | 0.006260583 | 0.234332689 |
| pcaec386.c51                    | 0.041592156  | 0.03482179  | 0.234374044 |
| pcaec384.pcaec406               | 0.016220476  | 0.013581843 | 0.234433461 |



|                            |              |             |             |
|----------------------------|--------------|-------------|-------------|
| leucine.kynurenine         | -0.006853763 | 0.005738872 | 0.234436004 |
| ornithine.lysopcac181      | 0.035629368  | 0.029834664 | 0.234452698 |
| smohc241.pcaec424          | 0.009597551  | 0.008036928 | 0.234470528 |
| pcaac322.pcaac362          | 0.043828923  | 0.036712492 | 0.234602788 |
| c162.pcaac383              | -0.008094007 | 0.006779885 | 0.234608826 |
| c5.lysopcac182             | -0.117039779 | 0.09804011  | 0.234621257 |
| c142.pcaec423              | 0.018447841  | 0.015454041 | 0.234649349 |
| smohc241.pcaac385          | -0.030903829 | 0.02589012  | 0.234676443 |
| pcaec404.pcaec423          | 0.027310577  | 0.022880345 | 0.234687074 |
| acetylmithoine.smohc141    | 0.030260837  | 0.025354817 | 0.234738372 |
| leucine.pcaec383           | 0.09252406   | 0.077525861 | 0.234751634 |
| pcaac320.putrescine        | -0.039229675 | 0.03287282  | 0.234784154 |
| lysopcac161.pcaec422       | 0.085390745  | 0.0715584   | 0.234813712 |
| c51dc.c16                  | -0.060112706 | 0.050379016 | 0.234849721 |
| alanine.pcaac385           | 0.023927382  | 0.020057389 | 0.234952445 |
| c102.c141oh                | 0.169229573  | 0.141862237 | 0.234964601 |
| pcaec401.glutamicacid      | 0.07530938   | 0.063132613 | 0.234979777 |
| lysopcac204.smohc141       | 0.051169291  | 0.042900164 | 0.235027877 |
| smc241.c14                 | -0.064744488 | 0.054283392 | 0.235043563 |
| pcaec362.pcaac385          | -0.056743469 | 0.047575218 | 0.235044332 |
| c102.pcaac383              | -0.006180323 | 0.005181773 | 0.235046851 |
| pcaac426.lysine            | 0.150517992  | 0.126209392 | 0.235085473 |
| pcaec402.smc161            | 0.128186882  | 0.107495673 | 0.235132808 |
| c4.pcaec424                | -0.017139074 | 0.014373118 | 0.235150225 |
| pcaec403.lysopcac203       | 0.016726186  | 0.014027552 | 0.235173098 |
| asparagine.taurine         | -0.043861897 | 0.036785622 | 0.23517924  |
| pcaac403.pcaac383          | 0.008792799  | 0.007374319 | 0.235183629 |
| pcaec443.c182              | -0.059034551 | 0.04952085  | 0.235276984 |
| pcaac383.c5                | 0.012050812  | 0.010110161 | 0.235341262 |
| c18.kynurenine             | 0.005804806  | 0.004870503 | 0.235388828 |
| smc161.transhydroxyproline | 0.045693851  | 0.038340606 | 0.235405034 |
| pcaac425.lysine            | 0.124255635  | 0.104264863 | 0.235427219 |
| pcaac386.pcaec382          | 0.012542348  | 0.010525218 | 0.235459806 |
| pcaec402.prolinr           | -0.047216397 | 0.039627217 | 0.235511805 |
| smc240.pcaac421            | -0.037233723 | 0.03125099  | 0.235540328 |
| c2.tyrosine                | 0.081614921  | 0.06850293  | 0.235553486 |
| smohc241.c18               | 0.035562873  | 0.029852755 | 0.235604979 |
| c12.c18                    | -0.059469818 | 0.049926749 | 0.235657663 |
| pcaac321.c182              | -0.032586631 | 0.027360152 | 0.235703109 |
| pcaec421.lysopcac182       | -0.130494438 | 0.109584679 | 0.235787665 |
| pcaec424.smohc222          | -0.015006577 | 0.012602577 | 0.23580901  |
| smc160.c141oh              | -0.112885726 | 0.094818823 | 0.235892501 |
| c101.pcaac385              | 0.019017584  | 0.015976373 | 0.235964745 |

|                                 |              |             |             |
|---------------------------------|--------------|-------------|-------------|
| pcaac425.c181                   | -0.012450337 | 0.01045957  | 0.235975357 |
| lysopcac160.pcaec424            | 0.005760293  | 0.004842022 | 0.236243131 |
| smc241.pcaec424                 | 0.004317132  | 0.003628953 | 0.236247182 |
| pcaec341.lysopcac204            | -0.028814387 | 0.024221288 | 0.236249194 |
| lysopcac204.pcaec423            | 0.019074977  | 0.016034543 | 0.236254272 |
| pcaac323.pcaec443               | -0.063571731 | 0.053441555 | 0.236278396 |
| pcaec340.ornithine              | 0.050647752  | 0.042579723 | 0.236308031 |
| pcaec445.smc180                 | 0.019759884  | 0.016613824 | 0.236353729 |
| pcaac421.histidine              | -0.114522616 | 0.096289994 | 0.236358756 |
| alphaaminoadipicacid.pcaac420   | 0.079097394  | 0.066515191 | 0.23643259  |
| smc260.pcaec444                 | -0.160356723 | 0.134854173 | 0.236452507 |
| smc260.c162                     | -0.113996238 | 0.095867259 | 0.236455266 |
| pcaac380.pcaac383               | 0.011905942  | 0.010013609 | 0.236505824 |
| pcaec363.spermidine             | -0.083662066 | 0.070381265 | 0.236614932 |
| methioninesulfoxide.c142        | 0.040939683  | 0.034440832 | 0.236615666 |
| pcaac406.pcaec424               | 0.003798565  | 0.003195622 | 0.236622843 |
| lysopcac160.c141                | 0.032730831  | 0.027537716 | 0.236660467 |
| pcaac362.pcaac360               | 0.033985179  | 0.028598731 | 0.236753164 |
| glycine.pcaac386                | 0.034041668  | 0.028648586 | 0.236790927 |
| pcaac404.pcaac403               | -0.008220455 | 0.006919186 | 0.236862651 |
| ornithine.alphaaminoadipicacid  | 0.009701434  | 0.008166695 | 0.236917751 |
| pcaec424.c3                     | -0.041746476 | 0.035144747 | 0.236950148 |
| c102.pcaac364                   | 0.076525785  | 0.064432499 | 0.237010933 |
| putrescine.pcaac422             | -0.02282243  | 0.019216071 | 0.237016891 |
| glycine.prolinr                 | -0.057888899 | 0.048760107 | 0.237195904 |
| smohc221.pcaec406               | 0.008245753  | 0.006945682 | 0.237212273 |
| c101.methionine                 | 0.080049199  | 0.067431532 | 0.237235315 |
| c3.pcaac365                     | -0.082078716 | 0.069141411 | 0.237237085 |
| c5.pcaac380                     | -0.149750439 | 0.126170532 | 0.237325346 |
| serine.pcaac322                 | 0.052497964  | 0.044234613 | 0.237357519 |
| smohc222.pcaac281               | 0.002604455  | 0.002194522 | 0.237361127 |
| glycine.lysopcac280             | 0.01262593   | 0.010639086 | 0.237380305 |
| pcaec446.serine                 | -0.019236387 | 0.016209766 | 0.237393497 |
| pcaac364.lysopcac182            | -0.054075299 | 0.045574712 | 0.237470603 |
| arginine.transhydroxyproline    | -0.058536836 | 0.049336214 | 0.237483041 |
| asparticacid.pcaac406           | 0.085130302  | 0.071750394 | 0.237486845 |
| c10.pcaac422                    | 0.025482206  | 0.021477603 | 0.237496162 |
| asymmetricdimethylarginine.pca  | 0.01752159   | 0.01477312  | 0.23765728  |
| pcaac383.pcaac281               | 0.005025736  | 0.004237458 | 0.237664912 |
| pcaac385.asparagine             | -0.0096188   | 0.008110824 | 0.237706048 |
| smc160.pcaec424                 | 0.006391038  | 0.00538968  | 0.237757096 |
| smc161.glutamicacid             | 0.055052956  | 0.046432692 | 0.237812629 |
| glycine.asymmetricdimethylargir | 0.019741608  | 0.016652244 | 0.23786319  |

|                           |              |             |             |
|---------------------------|--------------|-------------|-------------|
| pcaac426.lysopcac280      | 0.008201045  | 0.006917775 | 0.237870688 |
| pcaec445.smc181           | 0.02632212   | 0.022207594 | 0.237960361 |
| lysopcac160.lysine        | 0.108609889  | 0.091635526 | 0.237975271 |
| c182.smohc141             | 0.039943523  | 0.033702179 | 0.237993675 |
| leucine.pcaec404          | 0.038684732  | 0.032648946 | 0.238120506 |
| asparagine.pcaec300       | -0.021465586 | 0.018117532 | 0.238149222 |
| pcaec381.pcaec422         | -0.108057456 | 0.091208827 | 0.238177008 |
| pcaec360.pcaec342         | 0.158602692  | 0.133882688 | 0.238211139 |
| pcaac365.pcaec342         | 0.161625081  | 0.136456076 | 0.238286686 |
| smc161.pcaec343           | -0.101946428 | 0.086073923 | 0.238303314 |
| pcaec405.pcaec362         | 0.01682684   | 0.014210607 | 0.238422142 |
| pcaac360.smohc221         | -0.080661693 | 0.068122883 | 0.23843894  |
| alanine.pcaac281          | 0.003352056  | 0.002831733 | 0.238563098 |
| c3.smohc141               | -0.024657538 | 0.020831586 | 0.238597    |
| pcaac421.pcaec443         | -0.060327427 | 0.050971913 | 0.238643788 |
| pcaec300.smohc141         | -0.049828824 | 0.042102577 | 0.238656602 |
| pcaec363.serotonin        | -0.12533145  | 0.105903243 | 0.238679357 |
| pcaec443.serotonin        | -0.113013896 | 0.09551189  | 0.238761549 |
| pcaac405.pcaec321         | -0.04174861  | 0.035291281 | 0.238868943 |
| alphaaminoadipicacid.c182 | 0.039325781  | 0.033243755 | 0.238876808 |
| serotonin.leucine         | -0.038535551 | 0.032578865 | 0.238921637 |
| pcaec342.pcaec340         | 0.175399432  | 0.148303278 | 0.238973483 |
| smc160.pcaec361           | -0.01621046  | 0.013708637 | 0.239055686 |
| c102.lysopcac181          | -0.1087305   | 0.091962517 | 0.239120802 |
| c3.pcaac383               | -0.00699717  | 0.005919131 | 0.239202625 |
| pcaac383.pcaec446         | -0.053715316 | 0.04545625  | 0.239374813 |
| pcaec362.pcaec404         | -0.01496531  | 0.01266478  | 0.239392553 |
| pcaac363.asparagine       | 0.061874647  | 0.05236449  | 0.239405676 |
| smc260.pcaac360           | -0.033161891 | 0.028065116 | 0.239409348 |
| c182.valine               | -0.061162311 | 0.051762271 | 0.239411375 |
| pcaec321.smc160           | 0.115176928  | 0.097492473 | 0.239493358 |
| pcaac384.pcaec321         | -0.060533536 | 0.051243284 | 0.239531378 |
| smohc141.pcaac320         | -0.110780754 | 0.093798702 | 0.239629992 |
| pcaac384.isoleucine       | 0.030032204  | 0.025430789 | 0.239673187 |
| pcaac320.pcaec446         | -0.05686669  | 0.048166235 | 0.239793902 |
| asparagine.pcaec322       | 0.053797449  | 0.045569946 | 0.239828459 |
| pcaac385.pcaec421         | 0.001877051  | 0.001590114 | 0.239866579 |
| pcaec384.smc180           | -0.018347613 | 0.015545228 | 0.239936868 |
| c18.pcaec424              | 0.006290624  | 0.005329855 | 0.2399413   |
| glutamicacid.pcaec364     | -0.025517125 | 0.021620295 | 0.239950181 |
| pcaac322.pcaec340         | 0.073000594  | 0.061852742 | 0.239953081 |
| pcaac361.smohc161         | -0.01863859  | 0.015792429 | 0.239956649 |
| c141.smohc241             | -0.111279646 | 0.094292065 | 0.239981996 |

|                               |              |             |             |
|-------------------------------|--------------|-------------|-------------|
| lysopcac182.c18               | -0.049028052 | 0.041543703 | 0.239983235 |
| pcaac381.c162                 | -0.089473795 | 0.07581843  | 0.240003018 |
| lysopcac160.smc261            | 0.057156835  | 0.04843402  | 0.240006689 |
| lysopcac281.c141oh            | -0.111600368 | 0.09457384  | 0.240031521 |
| pcaac401.pcaec380             | -0.115169258 | 0.097615384 | 0.240113698 |
| pcaac404.h1                   | 0.0019081    | 0.001617322 | 0.24012844  |
| pcaac381.glutamicacid         | 0.06960415   | 0.058999948 | 0.24015118  |
| c2.pcaec301                   | -0.080736123 | 0.068443643 | 0.240203669 |
| pcaac364.smc160               | 0.111476843  | 0.094517123 | 0.24026895  |
| pcaec362.glycine              | 0.049383363  | 0.041878846 | 0.240363978 |
| pcaec380.pcaec402             | 0.101857211  | 0.086383435 | 0.240390531 |
| pcaec445.pcaec385             | -0.111508418 | 0.094580053 | 0.240447853 |
| pcaac342.lysopcac204          | -0.030276106 | 0.025680996 | 0.240469343 |
| lysopcac161.smohc141          | -0.065860225 | 0.055867238 | 0.240493198 |
| c0.c3                         | -0.032644682 | 0.027691752 | 0.24049752  |
| c141.smc202                   | -0.054018668 | 0.04582748  | 0.240545043 |
| pcaac323.asparagine           | 0.015351142  | 0.013024321 | 0.240579826 |
| pcaec424.pcaec421             | 0.006258852  | 0.005310636 | 0.240620226 |
| c10.pcaac365                  | 0.041248338  | 0.034999344 | 0.240621921 |
| phenylalanine.pcaec406        | 0.005936526  | 0.005037404 | 0.240644455 |
| kynurenine.c51dc              | 0.150388881  | 0.127627421 | 0.240702533 |
| pcaac362.pcaac323             | -0.089464585 | 0.075929883 | 0.240738434 |
| pcaec342.asymmetricdimethylar | 0.065832313  | 0.05587404  | 0.240748547 |
| pcaac360.pcaec364             | -0.011077639 | 0.009402136 | 0.240757558 |
| pcaac422.alanine              | -0.023244618 | 0.019733098 | 0.240858369 |
| pcaac362.valine               | -0.044491781 | 0.037772073 | 0.24087794  |
| smc240.pcaec424               | 0.004033895  | 0.003424931 | 0.240916943 |
| pcaac426.smohc241             | 0.059740429  | 0.050731074 | 0.241001557 |
| pcaec385.pcaac344             | 0.080184472  | 0.068098457 | 0.241046047 |
| c51.pcaac383                  | -0.004287709 | 0.003641455 | 0.241048923 |
| smc260.pcaec424               | 0.007660363  | 0.006505831 | 0.241052966 |
| pcaec445.c141                 | 0.035218587  | 0.029911547 | 0.241067548 |
| smohc221.smohc241             | 0.134774401  | 0.114492491 | 0.241178201 |
| pcaac404.lysopcac160          | -0.029272957 | 0.024871377 | 0.241246812 |
| glycine.pcaec383              | -0.063279793 | 0.053771388 | 0.24130391  |
| c141.pcaac380                 | -0.065090532 | 0.055312227 | 0.241322371 |
| smohc241.pcaec385             | -0.062545233 | 0.053150132 | 0.241329717 |
| smc260.pcaec423               | -0.00475359  | 0.00403981  | 0.241361035 |
| c182.pcaac383                 | -0.005621407 | 0.004777349 | 0.241364017 |
| pcaec401.c4                   | -0.048277943 | 0.041030091 | 0.241376716 |
| pcaec402.pcaac405             | -0.058292078 | 0.049549203 | 0.241455865 |
| acetylmithoine.spermidine     | 0.079971686  | 0.067979187 | 0.241469427 |
| pcaac405.pcaec423             | -0.004679726 | 0.003978216 | 0.241499874 |

|                               |              |             |             |
|-------------------------------|--------------|-------------|-------------|
| smc260.c102                   | 0.045583261  | 0.038752887 | 0.241533002 |
| pcaac402.pcaec423             | 0.038441445  | 0.032682237 | 0.241547448 |
| pcaec446.asymmetricdimethylar | 0.031599726  | 0.026867235 | 0.241577205 |
| pcaec443.creatinine           | -0.014889373 | 0.012660674 | 0.241621163 |
| pcaec421.smohc241             | 0.075122941  | 0.063881436 | 0.24164452  |
| pcaec360.spermidine           | -0.101051474 | 0.085939515 | 0.241696457 |
| spermidine.c51dc              | 0.236691819  | 0.201338549 | 0.241797238 |
| pcaec420.pcaac322             | -0.066454229 | 0.056537504 | 0.241873081 |
| pcaac425.lysopcac180          | -0.087814972 | 0.074745612 | 0.242092201 |
| pcaec446.transhydroxyproline  | 0.054583744  | 0.046461586 | 0.242106849 |
| smohc222.pcaec363             | 0.054680578  | 0.046553657 | 0.242203941 |
| pcaec322.pcaac426             | 0.098942468  | 0.084246149 | 0.242254231 |
| pcaec446.pcaac383             | 0.009177871  | 0.007815241 | 0.242289965 |
| pcaac420.asparticacid         | 0.047970541  | 0.040850151 | 0.242310056 |
| pcaac322.pcaac360             | 0.049249626  | 0.041947019 | 0.242395415 |
| histidine.pcaec445            | -0.083671368 | 0.071265618 | 0.242400835 |
| pcaec364.pcaec421             | 0.001227728  | 0.001045776 | 0.24243693  |
| smc260.c141oh                 | -0.120715861 | 0.102831666 | 0.242464878 |
| lysopcac161.smc261            | 0.079937091  | 0.068106119 | 0.242546097 |
| pcaec381.lysopcac161          | 0.069724823  | 0.059410991 | 0.242590977 |
| putrescine.pcaec444           | 0.115167825  | 0.098135329 | 0.242606989 |
| pcaec422.putrescine           | -0.056189128 | 0.047881878 | 0.242633617 |
| pcaec300.asparagine           | 0.006753487  | 0.005755698 | 0.242688745 |
| pcaec363.putrescine           | -0.034533624 | 0.029431622 | 0.242690979 |
| citruline.c141                | 0.064066998  | 0.054602218 | 0.242695157 |
| pcaec340.pcaec385             | -0.083990917 | 0.071583006 | 0.242696992 |
| pcaac322.pcaac420             | -0.099936563 | 0.085181202 | 0.242742049 |
| pcaac361.pcaac320             | -0.087936957 | 0.074960382 | 0.24278631  |
| smc180.smohc141               | -0.028890323 | 0.024627251 | 0.242789753 |
| pcaac403.smohc241             | 0.08677935   | 0.073977288 | 0.242809689 |
| putrescine.glutamicacid       | -0.093556938 | 0.07977729  | 0.242940594 |
| pcaec444.creatinine           | -0.0079137   | 0.006748343 | 0.242955994 |
| c51.pcaac365                  | -0.051313232 | 0.043757347 | 0.242960382 |
| pcaec383.smohc241             | 0.109182895  | 0.093121434 | 0.243039663 |
| lysopcac161.c142              | -0.042607533 | 0.036344411 | 0.243100336 |
| pcaec422.serine               | -0.03551223  | 0.030294542 | 0.243138354 |
| pcaac321.alanine              | -0.044399193 | 0.037877295 | 0.24315717  |
| glycine.spermidine            | -0.083337366 | 0.071108557 | 0.243241623 |
| pcaec365.lysopcac181          | 0.05219899   | 0.044548894 | 0.243341755 |
| pcaec386.pcaec423             | -0.004249351 | 0.003626787 | 0.243368397 |
| pcaec364.pcaac383             | 0.005982483  | 0.005106633 | 0.243426308 |
| smc180.pcaac341               | -0.036502338 | 0.031159739 | 0.24344791  |
| pcaac383.pcaec423             | -0.006602657 | 0.005636528 | 0.24346931  |

|                                |              |             |             |
|--------------------------------|--------------|-------------|-------------|
| isoleucine.smc180              | -0.050820358 | 0.043384945 | 0.243478377 |
| pcaec406.pcaac383              | 0.009747833  | 0.008323065 | 0.243558157 |
| pcaec361.pcaec422              | -0.048533614 | 0.041440472 | 0.243565571 |
| histidine.pcaec322             | 0.065275806  | 0.05573776  | 0.24358199  |
| smc240.pcaac361                | 0.064540805  | 0.055112159 | 0.243599027 |
| pcaac402.glutamicacid          | 0.13578434   | 0.115959407 | 0.243645755 |
| lysine.smc240                  | -0.056993916 | 0.048676462 | 0.243682704 |
| pcaac362.pcaac365              | -0.06543198  | 0.055883207 | 0.243683517 |
| c3.pcaac361                    | -0.10175968  | 0.08691116  | 0.243692755 |
| glycine.pcaec423               | -0.031954984 | 0.027297178 | 0.243778458 |
| pcaec360.pcaec424              | 0.003892914  | 0.003326051 | 0.243859415 |
| pcaac300.pcaec423              | -0.009165061 | 0.007830921 | 0.243884675 |
| pcaec386.pcaec383              | 0.098411641  | 0.0840887   | 0.243899465 |
| pcaec362.pcaac300              | -0.115261429 | 0.098502063 | 0.243975269 |
| pcaec322.pcaac383              | 0.005221739  | 0.004463333 | 0.244064822 |
| pcaac360.pcaac365              | 0.109703023  | 0.093777213 | 0.244102112 |
| ornithine.pcaac403             | -0.006575716 | 0.005621526 | 0.244137203 |
| pcaec422.asymmetricdimethylar; | 0.027658123  | 0.023645881 | 0.24416054  |
| pcaec421.lysopcac170           | -0.064994294 | 0.055583069 | 0.244305879 |
| pcaec340.pcaec301              | -0.06638797  | 0.056775342 | 0.244309211 |
| lysopcac280.pcaec380           | -0.053638151 | 0.045874164 | 0.244335145 |
| pcaac386.pcaec383              | 0.093284114  | 0.079781905 | 0.244337673 |
| smohc161.pcaac383              | 0.00591912   | 0.005062407 | 0.244341152 |
| pcaec406.h1                    | 0.003969678  | 0.003395537 | 0.244398737 |
| smc241.pcaec343                | -0.101547004 | 0.086886148 | 0.244539484 |
| pcaac381.pcaec423              | -0.006864592 | 0.00587384  | 0.244565381 |
| pcaec361.pcaec402              | -0.152599389 | 0.130577147 | 0.244572938 |
| pcaac404.isoleucine            | 0.039179015  | 0.033528413 | 0.244621693 |
| smohc141.lysopcac181           | 0.061201491  | 0.052376408 | 0.24463707  |
| pcaec424.alanine               | -0.015555697 | 0.013312739 | 0.244641639 |
| smc260.pcaac365                | 0.082869241  | 0.070922262 | 0.244653835 |
| smc261.putrescine              | -0.058926626 | 0.050434036 | 0.244678618 |
| pcaec321.pcaec444              | 0.194604847  | 0.166558836 | 0.244680648 |
| pcaac424.pcaac364              | -0.008592347 | 0.007354328 | 0.24469919  |
| pcaac422.c51                   | 0.169711739  | 0.145281807 | 0.24477289  |
| pcaac386.glycine               | 0.032214008  | 0.027586214 | 0.244932885 |
| pcaac361.pcaec380              | -0.077739164 | 0.066573503 | 0.244948248 |
| pcaec424.pcaac422              | -0.024685663 | 0.021140739 | 0.244963198 |
| pcaec444.putrescine            | -0.052240489 | 0.044742281 | 0.245001605 |
| c18.pcaac363                   | -0.013867103 | 0.01187734  | 0.245025999 |
| pcaac380.smohc221              | 0.034703803  | 0.029724272 | 0.24502676  |
| pcaac300.pcaec403              | -0.101391305 | 0.086862883 | 0.245134217 |
| glycine.pcaec301               | -0.063945129 | 0.05479722  | 0.245261323 |

|                          |              |             |             |
|--------------------------|--------------|-------------|-------------|
| c2.c141oh                | 0.168177254  | 0.144129363 | 0.245298255 |
| c51dc.pcaec445           | -0.060105051 | 0.051510574 | 0.245298484 |
| smohc222.smohc241        | 0.200392129  | 0.17173887  | 0.245301209 |
| pcaac383.creatinine      | -0.010358129 | 0.008877605 | 0.245329941 |
| c10.pcaac281             | -0.005172922 | 0.004433858 | 0.245363818 |
| pcaac343.pcaac381        | 0.026699077  | 0.022886854 | 0.245411422 |
| pcaac364.pcaec406        | 0.018825913  | 0.016140042 | 0.245474994 |
| pcaac406.pcaac403        | 0.041979263  | 0.035993837 | 0.245523369 |
| pcaac422.smc181          | -0.010653049 | 0.009135603 | 0.245599034 |
| lysopcac182.pcaec445     | -0.05487136  | 0.047055696 | 0.245602485 |
| pcaac365.pcaec382        | 0.019120923  | 0.016397804 | 0.245613702 |
| pcaac425.c18             | 0.057872492  | 0.049633772 | 0.245644264 |
| smohc241.smc161          | 0.115130917  | 0.098759216 | 0.245731434 |
| c18.pcaec443             | -0.070913561 | 0.060834341 | 0.245768047 |
| pcaac384.lysopcac203     | -0.014072594 | 0.012072416 | 0.24576861  |
| pcaac386.pcaac362        | -0.034840103 | 0.02988894  | 0.245780566 |
| c8.pcaac422              | 0.024219317  | 0.02077753  | 0.245781594 |
| smc260.lysopcac280       | -0.016704085 | 0.014330884 | 0.245801336 |
| pcaac403.glutamicacid    | 0.115835946  | 0.099390099 | 0.245854884 |
| pcaec406.isoleucine      | 0.04432318   | 0.038033934 | 0.245898769 |
| asparagine.ornithine     | 0.044140673  | 0.037880725 | 0.24594097  |
| pcaec402.pcaec443        | -0.100701382 | 0.086420422 | 0.245942723 |
| c3.pcaac362              | -0.025347168 | 0.021753    | 0.245952197 |
| pcaec406.pcaac322        | -0.074378269 | 0.063834153 | 0.245970941 |
| pcaec446.pcaac281        | 0.002534534  | 0.002175511 | 0.246031853 |
| histidine.pcaec360       | -0.009854636 | 0.008458792 | 0.24603669  |
| pcaec406.putrescine      | -0.057524757 | 0.049377375 | 0.246042547 |
| lysopcac161.asparticacid | 0.036925405  | 0.031699326 | 0.246098339 |
| glutamine.pcaec362       | -0.01442932  | 0.012389084 | 0.246172528 |
| smc161.pcaac405          | -0.06731168  | 0.057795045 | 0.246179956 |
| c5.glutamine             | -0.045629187 | 0.039178504 | 0.246185296 |
| smc181.pcaac362          | 0.056881334  | 0.048844621 | 0.246230594 |
| pcaac401.pcaac361        | 0.09044506   | 0.077667041 | 0.246235941 |
| h1.pcaec424              | 0.007880739  | 0.00676922  | 0.246365554 |
| pcaac404.kynurenine      | -0.022710896 | 0.019512349 | 0.246477709 |
| pcaec321.valine          | 0.105610127  | 0.09074019  | 0.246498111 |
| c2.pcaac385              | 0.047159422  | 0.040520814 | 0.246514959 |
| serine.pcaec364          | -0.016664591 | 0.014320149 | 0.246561718 |
| pcaac422.pcaac403        | 0.033492932  | 0.028785476 | 0.246634653 |
| pcaec405.pcaec380        | 0.105387414  | 0.09058747  | 0.246698674 |
| pcaac343.pcaac383        | -0.005298383 | 0.004554525 | 0.24672074  |
| smohc141.pcaec421        | 0.001650221  | 0.00141869  | 0.246770064 |
| glutamicacid.pcaec342    | 0.139532794  | 0.119956908 | 0.246774018 |

|                        |              |             |             |
|------------------------|--------------|-------------|-------------|
| pcaec403.pcaec364      | -0.00799575  | 0.006874082 | 0.246781059 |
| pcaac321.lysopcac180   | -0.062284046 | 0.053556563 | 0.24686812  |
| pcaac366.methionine    | -0.051755604 | 0.044505114 | 0.246886159 |
| smohc221.pcaac300      | -0.072367993 | 0.062230545 | 0.246891069 |
| lysopcac161.methionine | -0.054358088 | 0.046744214 | 0.246898237 |
| pcaac380.pcaec382      | 0.01955748   | 0.016818382 | 0.246906507 |
| c182.pcaec360          | -0.008999572 | 0.007739282 | 0.246914577 |
| pcaec423.pcaac383      | 0.015160917  | 0.013038588 | 0.246943063 |
| c102.pcaac322          | -0.094118594 | 0.080953485 | 0.24700265  |
| pcaec446.pcaac386      | 0.050073455  | 0.04307299  | 0.247043088 |
| pcaec405.pcaec364      | -0.011233068 | 0.009663308 | 0.247075555 |
| pcaec421.pcaac363      | -0.022710974 | 0.019546872 | 0.247307398 |
| pcaac365.pcaac323      | 0.107329353  | 0.092376811 | 0.247310593 |
| smc161.lysopcac181     | 0.052329082  | 0.045043437 | 0.247358201 |
| pcaec386.lysopcac203   | -0.020821968 | 0.017923541 | 0.24737299  |
| pcaac342.pcaac406      | -0.05918297  | 0.050957943 | 0.24749548  |
| asparagine.glycine     | 0.03988601   | 0.034344064 | 0.247512764 |
| pcaac424.smohc221      | -0.134856568 | 0.116125444 | 0.247538977 |
| lysine.c141oh          | -0.142840167 | 0.123004269 | 0.247554739 |
| pcaac426.pcaac402      | -0.098141203 | 0.084536346 | 0.247687199 |
| asparagine.smohc141    | -0.02516592  | 0.021678775 | 0.24771953  |
| pcaec425.pcaec383      | -0.103971195 | 0.089565199 | 0.247724216 |
| pcaac240.pcaac406      | 0.009965374  | 0.008587112 | 0.247862101 |
| pcaac386.lysopcac203   | -0.019116859 | 0.016473352 | 0.247875039 |
| pcaac425.putrescine    | -0.042132412 | 0.036307403 | 0.247889565 |
| lysopcac170.pcaac300   | -0.063499725 | 0.054723552 | 0.247915111 |
| pcaec340.kynurenine    | -0.009152328 | 0.007887679 | 0.247931603 |
| glutamicacid.c16       | -0.087830921 | 0.075701681 | 0.247975414 |
| c5.pcaac403            | 0.008101443  | 0.006983236 | 0.248014705 |
| pcaec343.glutamicacid  | 0.06163055   | 0.053131819 | 0.248084385 |
| lysopcac160.prolinr    | -0.049983397 | 0.043093093 | 0.248109597 |
| pcaac421.c142          | 0.059581689  | 0.051371037 | 0.248135206 |
| pcaac342.pcaec342      | 0.137534871  | 0.118595422 | 0.248188934 |
| pcaac384.asparticacid  | 0.035168558  | 0.030327934 | 0.248224884 |
| c10.c14                | -0.086914138 | 0.074958424 | 0.248270138 |
| pcaec402.pcaec364      | -0.008170261 | 0.007047146 | 0.248321393 |
| asparagine.pcaac381    | 0.028800448  | 0.024841457 | 0.248321957 |
| creatinine.pcaac322    | -0.053720361 | 0.046343886 | 0.248404013 |
| c0.serine              | -0.041241597 | 0.03558766  | 0.24852373  |
| pcaac363.pcaac422      | -0.021371654 | 0.018449343 | 0.248717604 |
| pcaac380.smc202        | 0.049705314  | 0.042912678 | 0.248760995 |
| pcaac361.pcaac363      | -0.01589881  | 0.013726869 | 0.248787109 |
| histidine.lysopcac180  | 0.054778005  | 0.04729572  | 0.248796599 |



|                         |              |             |             |
|-------------------------|--------------|-------------|-------------|
| pcaec405.smc240         | -0.042764489 | 0.036924508 | 0.248813725 |
| pcaac381.pcaec364       | -0.007674517 | 0.006626803 | 0.248837185 |
| pcaac384.smc241         | 0.078354193  | 0.067669402 | 0.248920719 |
| citruiline.smc180       | 0.036091178  | 0.031170512 | 0.248934587 |
| pcaec386.pcaec405       | 0.085690258  | 0.074023068 | 0.249035171 |
| pcaac425.pcaec424       | 0.018921456  | 0.016347644 | 0.249105658 |
| pcaec321.pcaec401       | 0.073893231  | 0.063843975 | 0.249121536 |
| pcaec425.pcaec406       | 0.008755668  | 0.007564943 | 0.249122728 |
| citruiline.lysine       | 0.091545156  | 0.079099749 | 0.249148082 |
| pcaec360.pcaac300       | 0.060375033  | 0.052168673 | 0.249161826 |
| smc160.pcaac403         | -0.005152451 | 0.004452507 | 0.249203442 |
| arginine.pcaec301       | 0.060893686  | 0.05262158  | 0.24920436  |
| c4.pcaec422             | 0.04620982   | 0.039932621 | 0.249206436 |
| kynurenine.pcaec424     | 0.010695517  | 0.009244829 | 0.249318789 |
| pcaec360.pcaec404       | 0.038130985  | 0.032963756 | 0.249385549 |
| pcaac403.pcaac363       | -0.022474569 | 0.019431331 | 0.249442521 |
| pcaec301.smc261         | 0.045597064  | 0.039424011 | 0.249456349 |
| smc181.pcaac403         | -0.006056198 | 0.005237124 | 0.249531077 |
| pcaec445.pcaac383       | 0.009440954  | 0.008164724 | 0.249566648 |
| pcaac406.smohc141       | -0.018856097 | 0.016308027 | 0.249592684 |
| pcaec404.pcaec364       | -0.008139561 | 0.007039832 | 0.24960538  |
| pcaac361.smc181         | -0.036873879 | 0.031893654 | 0.249631593 |
| pcaec421.pcaac383       | 0.012219178  | 0.010568888 | 0.249633611 |
| smohc161.pcaac402       | -0.081436483 | 0.070448968 | 0.249707725 |
| pcaac341.lysopcac182    | -0.020471867 | 0.01771044  | 0.249725397 |
| smohc241.pcaac320       | 0.078802167  | 0.068179765 | 0.249774688 |
| pcaec443.pcaec405       | 0.154970578  | 0.13409462  | 0.249823256 |
| pcaac420.smc202         | 0.074256176  | 0.064265796 | 0.249915724 |
| c141.lysopcac180        | -0.069970082 | 0.06056055  | 0.24994841  |
| lysopcac170.prolinr     | -0.062749885 | 0.054312805 | 0.249961287 |
| kynurenine.pcaec382     | -0.011175753 | 0.009673145 | 0.249963019 |
| histidine.pcaac240      | -0.017602339 | 0.015237338 | 0.250014917 |
| pcaec424.pcaac420       | 0.121896747  | 0.105520155 | 0.250019902 |
| lysopcac280.lysopcac181 | 0.032553687  | 0.028183011 | 0.250067541 |
| arginine.pcaec380       | 0.064427495  | 0.055781364 | 0.25010084  |
| smc261.pcaac380         | -0.076133713 | 0.065917448 | 0.250106804 |
| pcaec421.pcaac402       | -0.255315754 | 0.22106474  | 0.25012687  |
| c12.smc160              | -0.11321109  | 0.098033035 | 0.250172029 |
| pcaac360.lysopcac181    | 0.03584854   | 0.031047363 | 0.250247765 |
| c18.pcaec403            | 0.048251251  | 0.041792027 | 0.250282072 |
| pcaec386.smohc161       | 0.056154208  | 0.048643859 | 0.250348135 |
| smc161.c162             | 0.111325524  | 0.096443183 | 0.250381865 |
| smc180.pcaac383         | 0.005291921  | 0.004584789 | 0.250413571 |

|                              |              |             |             |
|------------------------------|--------------|-------------|-------------|
| pcaec425.pcaac383            | 0.006461476  | 0.00559845  | 0.250446234 |
| smc161.pcaec401              | 0.072487733  | 0.06281263  | 0.250496581 |
| prolinr.pcaac281             | 0.001413107  | 0.001224524 | 0.250507317 |
| pcaec444.pcaac406            | -0.04384545  | 0.037994445 | 0.250510823 |
| pcaac401.alanine             | -0.018781856 | 0.016276705 | 0.250546013 |
| smohc222.smohc221            | 0.072613648  | 0.062953315 | 0.250733146 |
| putrescine.pcaac425          | -0.095975933 | 0.083207624 | 0.250733616 |
| pcaac425.h1                  | 0.011850819  | 0.010274672 | 0.250754059 |
| pcaac406.pcaec445            | 0.095546048  | 0.082838604 | 0.250754529 |
| pcaec340.taurine             | 0.074908891  | 0.064951189 | 0.250791123 |
| alphaaminoadipicacid.leucine | 0.017961085  | 0.015573825 | 0.250800865 |
| smohc241.pcaec406            | 0.007370055  | 0.00639079  | 0.250823792 |
| pcaec341.lysopcac182         | -0.021869355 | 0.018964002 | 0.250834851 |
| pcaec360.kynurenine          | -0.015287315 | 0.013256704 | 0.250846094 |
| pcaac425.lysopcac181         | 0.038978687  | 0.033812875 | 0.251009561 |
| putrescine.valine            | -0.087475029 | 0.075900278 | 0.251122922 |
| pcaec342.pcaac240            | -0.018418191 | 0.015981423 | 0.251132903 |
| creatinine.pcaec301          | -0.08105849  | 0.070335768 | 0.25114297  |
| lysopcac280.serine           | -0.034342103 | 0.029799656 | 0.251150188 |
| pcaec405.pcaac365            | -0.069137837 | 0.060001508 | 0.251217534 |
| smc160.smohc221              | 0.051895363  | 0.045040348 | 0.251246642 |
| pcaec343.pcaac426            | 0.095560911  | 0.082954007 | 0.25133779  |
| smc202.leucine               | -0.030831062 | 0.026764446 | 0.251351572 |
| lysopcac160.pcaec342         | 0.133935966  | 0.116271942 | 0.251360193 |
| pcaec444.spermidine          | -0.078671641 | 0.068297097 | 0.251367061 |
| pcaec404.pcaac383            | 0.007812577  | 0.006782387 | 0.251371673 |
| pcaac404.lysopcac280         | 0.008336707  | 0.007239978 | 0.251539444 |
| smc202.pcaec402              | -0.06798341  | 0.059040331 | 0.251542837 |
| pcaac405.pcaac344            | -0.073694463 | 0.064000172 | 0.251543317 |
| pcaac361.lysopcac181         | 0.034465166  | 0.029932633 | 0.251563149 |
| smohc221.c182                | 0.040252873  | 0.034960378 | 0.251579121 |
| pcaac363.kynurenine          | -0.012080057 | 0.010492561 | 0.251615292 |
| lysine.glycine               | 0.056930684  | 0.0494518   | 0.251640471 |
| asparagine.pcaac406          | -0.02430473  | 0.021117855 | 0.251774443 |
| serotonin.pcaec424           | -0.005173951 | 0.004495631 | 0.251784556 |
| c51.pcaac322                 | 0.094230597  | 0.081881691 | 0.251813405 |
| pcaac342.leucine             | -0.007201714 | 0.00625886  | 0.251883528 |
| pcaac323.c182                | -0.061209707 | 0.053202114 | 0.251936987 |
| citruline.c16                | -0.05078522  | 0.044144803 | 0.251973558 |
| pcaec322.pcaac320            | 0.175830522  | 0.152870767 | 0.252069125 |
| smc181.pcaac384              | 0.080831414  | 0.070283958 | 0.252118961 |
| pcaec405.c182                | -0.039615142 | 0.034449778 | 0.25217241  |
| pcaac402.pcaec364            | -0.006478603 | 0.005634287 | 0.25220764  |

|                                |              |             |             |
|--------------------------------|--------------|-------------|-------------|
| pcaac422.asparticacid          | 0.044699825  | 0.03887521  | 0.252217753 |
| pcaac380.pcaac341              | 0.007325651  | 0.006371378 | 0.252239754 |
| pcaec384.h1                    | 0.002187025  | 0.001902293 | 0.25227939  |
| pcaac403.lysopcac182           | -0.108264817 | 0.094172082 | 0.252291551 |
| pcaac343.pcaec406              | 0.007974307  | 0.006937318 | 0.252360921 |
| pcaac421.pcaac341              | 0.004988634  | 0.004340554 | 0.252431505 |
| phenylalanine.pcaec340         | -0.057124339 | 0.049730109 | 0.252686615 |
| asymmetricdimethylarginine.pca | -0.066989086 | 0.058339076 | 0.25285761  |
| smohc241.pcaac360              | -0.035997701 | 0.031352238 | 0.252899242 |
| c10.smohc141                   | -0.046800737 | 0.040774766 | 0.25305694  |
| pcaac385.pcaec444              | 0.109871508  | 0.095742794 | 0.253146361 |
| pcaec365.pcaac360              | 0.05744664   | 0.050063026 | 0.253180565 |
| lysopcac281.pcaac363           | 0.011276353  | 0.00983032  | 0.253339936 |
| pcaec385.c51                   | 0.036457163  | 0.031786958 | 0.253412936 |
| c142.pcaec406                  | -0.0064306   | 0.005607438 | 0.253463904 |
| smc241.pcaac403                | -0.007905424 | 0.006895727 | 0.253618312 |
| glutamine.pcaec364             | 0.015247059  | 0.013299904 | 0.253626495 |
| pcaec322.isoleucine            | 0.034931774  | 0.030474796 | 0.253689331 |
| pcaac362.pcaec424              | 0.004155975  | 0.003625804 | 0.253701583 |
| pcaac384.pcaec406              | 0.019577681  | 0.017081445 | 0.253736322 |
| acetylmithoine.smohc161        | 0.023755751  | 0.020729557 | 0.253799326 |
| pcaac240.pcaac422              | -0.037873953 | 0.033053058 | 0.253853455 |
| c182.c51                       | 0.073297616  | 0.063969551 | 0.25386699  |
| smc240.pcaac300                | -0.070204969 | 0.061277076 | 0.253917845 |
| pcaec363.pcaac364              | -0.05553192  | 0.048473002 | 0.253947274 |
| smc261.pcaec406                | 0.008887369  | 0.007757737 | 0.253952302 |
| pcaac341.smohc141              | -0.025370026 | 0.022148012 | 0.254008883 |
| pcaec424.pcaac383              | 0.006636556  | 0.005793721 | 0.254009917 |
| pcaac323.c141                  | -0.033102304 | 0.028899945 | 0.254036041 |
| pcaac343.smohc161              | -0.02894517  | 0.025276917 | 0.254154877 |
| arginine.pcaac383              | -0.00773155  | 0.006752462 | 0.254206662 |
| lysopcac170.tyrosine           | -0.088345155 | 0.077159184 | 0.254216797 |
| leucine.smohc141               | -0.015837641 | 0.013833774 | 0.254266099 |
| pcaac380.asparticacid          | -0.058809659 | 0.051370006 | 0.254277814 |
| isoleucine.pcaec380            | 0.048699112  | 0.042538591 | 0.254279013 |
| c51dc.threonine                | -0.079618403 | 0.069549208 | 0.254297153 |
| pcaec362.pcaac240              | -0.013081924 | 0.011427555 | 0.254300376 |
| pcaac366.pcaac341              | 0.012708583  | 0.011103833 | 0.254402805 |
| c18.pcaec380                   | -0.021215856 | 0.018541523 | 0.254521519 |
| glycine.pcaac322               | -0.071200462 | 0.062232536 | 0.254575773 |
| c10.pcaac386                   | 0.028059499  | 0.024528284 | 0.254633011 |
| pcaec361.pcaec406              | 0.009779755  | 0.008550152 | 0.254696764 |
| pcaec386.pcaec424              | 0.012506233  | 0.010934364 | 0.25471983  |

|                              |              |             |             |
|------------------------------|--------------|-------------|-------------|
| prolinr.glycine              | -0.021989066 | 0.019225729 | 0.254729645 |
| c141.pcaec362                | 0.023197029  | 0.020283194 | 0.254760075 |
| pcaac362.pcaac421            | -0.041507132 | 0.036299369 | 0.254838867 |
| pcaac323.pcaac365            | -0.061445604 | 0.053738948 | 0.254862824 |
| lysine.pcaac380              | 0.108395813  | 0.09481407  | 0.25493026  |
| spermidine.asparticacid      | -0.14441387  | 0.126331419 | 0.254976197 |
| pcaac344.alanine             | -0.045946949 | 0.040196679 | 0.255009983 |
| ornithine.smohc241           | 0.09029391   | 0.079003823 | 0.255071129 |
| pcaac360.pcaec424            | 0.016701954  | 0.014614372 | 0.255096407 |
| ornithine.spermidine         | -0.082804792 | 0.072469125 | 0.255188627 |
| pcaac342.pcaac380            | 0.090321388  | 0.079049726 | 0.255201935 |
| pcaec301.pcaec383            | -0.092977902 | 0.081378274 | 0.255222593 |
| lysopcac161.smc202           | 0.06545926   | 0.057300482 | 0.255286252 |
| pcaec443.pcaec361            | 0.026962819  | 0.023606422 | 0.255370877 |
| smohc141.pcaac383            | 0.007216672  | 0.006318442 | 0.255379707 |
| pcaac362.pcaac422            | -0.017642322 | 0.01544646  | 0.255379969 |
| pcaec384.pcaac383            | 0.005407537  | 0.004734729 | 0.255404308 |
| pcaec342.pcaac344            | 0.136491425  | 0.119516504 | 0.255433646 |
| pcaac281.phenylalanine       | 0.054168512  | 0.047432121 | 0.255437049 |
| c0.pcaac422                  | -0.042289277 | 0.037031883 | 0.255458727 |
| pcaac320.pcaec423            | -0.007972699 | 0.006982064 | 0.25549456  |
| pcaac366.c141oh              | -0.094997122 | 0.083205669 | 0.255564308 |
| pcaec300.smohc241            | 0.087360603  | 0.076524712 | 0.255611821 |
| c51dc.lysopcac181            | -0.096351413 | 0.0844054   | 0.255640206 |
| pcaac386.pcaac341            | 0.013170667  | 0.011537943 | 0.255649455 |
| pcaec443.pcaec423            | 0.029806506  | 0.026114148 | 0.255697574 |
| pcaec404.pcaac381            | 0.046309549  | 0.04057974  | 0.255778081 |
| pcaec425.pcaec403            | 0.052908801  | 0.046363359 | 0.255787092 |
| pcaac363.pcaec406            | 0.00556117   | 0.004873201 | 0.255788401 |
| pcaec341.pcaec301            | -0.05550439  | 0.048644469 | 0.255851546 |
| putrescine.smohc141          | 0.010915635  | 0.009566565 | 0.255852543 |
| kynurenine.pcaec380          | -0.05802521  | 0.050856325 | 0.255875642 |
| pcaec423.pcaec362            | 0.015170851  | 0.013296681 | 0.255881138 |
| pcaec383.c182                | -0.056233849 | 0.049301352 | 0.2560203   |
| pcaac402.pcaac403            | 0.018844025  | 0.01652215  | 0.256055026 |
| pcaec342.pcaac364            | -0.061864295 | 0.054242052 | 0.256058469 |
| c14.pcaec406                 | -0.007042523 | 0.006175913 | 0.256142229 |
| methioninesulfoxide.pcaac365 | -0.101396978 | 0.088933071 | 0.256213459 |
| c14.pcaec403                 | 0.031314061  | 0.02746859  | 0.25627742  |
| pcaec363.pcaac403            | -0.004807438 | 0.004217113 | 0.256282463 |
| methioninesulfoxide.pcaec364 | -0.00595963  | 0.005229196 | 0.256406766 |
| pcaac420.glutamicacid        | 0.084509152  | 0.074177136 | 0.256570981 |
| pcaec403.pcaac383            | 0.011586091  | 0.01017035  | 0.256606539 |

|                                  |              |             |             |
|----------------------------------|--------------|-------------|-------------|
| asparticacid.transhydroxyproline | 0.059861316  | 0.05256099  | 0.256735532 |
| pcaec365.pcaec424                | 0.016626931  | 0.014599972 | 0.256760248 |
| pcaac403.c182                    | -0.073567632 | 0.064599257 | 0.256761113 |
| lysopcac180.c182                 | -0.041694644 | 0.036612538 | 0.256770734 |
| c51dc.lysine                     | -0.103451004 | 0.090845641 | 0.256792333 |
| pcaec381.pcaec364                | -0.007290692 | 0.006402577 | 0.256810484 |
| pcaec365.pcaec444                | 0.120692696  | 0.106008816 | 0.256892209 |
| pcaec383.pcaec364                | -0.007154394 | 0.006284155 | 0.256906449 |
| pcaac320.lysopcac182             | -0.025092379 | 0.022046838 | 0.257048645 |
| phenylalanine.pcaec362           | -0.013403297 | 0.011778286 | 0.257120591 |
| pcaec362.pcaac341                | 0.016822416  | 0.014782952 | 0.257123147 |
| pcaac406.c102                    | 0.035571938  | 0.031263271 | 0.25718211  |
| lysopcac160.smc160               | -0.081522045 | 0.071650636 | 0.257201847 |
| glutamicacid.lysopcac181         | 0.096791109  | 0.085079446 | 0.257250045 |
| smc241.pcaec362                  | 0.018158879  | 0.015962353 | 0.257270406 |
| kynurenine.smohc161              | 0.028205043  | 0.024795128 | 0.257305016 |
| pcaac381.ornithine               | 0.040732184  | 0.035808631 | 0.257316379 |
| pcaec406.lysopcac181             | 0.0435973    | 0.038330057 | 0.257348927 |
| pcaac281.c142                    | 0.061936026  | 0.054462107 | 0.257426618 |
| pcaec402.alanine                 | -0.014736709 | 0.01295917  | 0.257454508 |
| lysopcac161.smc160               | -0.055401554 | 0.048721895 | 0.257482372 |
| c2.pcaec405                      | 0.074309912  | 0.065363933 | 0.257579659 |
| pcaac364.pcaac361                | -0.048462519 | 0.042638886 | 0.25769794  |
| phenylalanine.pcaec365           | 0.033988362  | 0.029904839 | 0.257710348 |
| kynurenine.lysopcac182           | -0.05708396  | 0.050233491 | 0.257784545 |
| pcaec322.pcaac281                | 0.002256402  | 0.001985858 | 0.25784183  |
| pcaec421.pcaec364                | -0.007506085 | 0.006606379 | 0.257861719 |
| pcaec364.pcaac341                | 0.010873834  | 0.009570998 | 0.257888457 |
| c51.c10                          | 0.009346246  | 0.008227192 | 0.257932001 |
| ornithine.c142                   | -0.087674217 | 0.077189473 | 0.258010265 |
| pcaac341.pcaac364                | -0.094683914 | 0.083363076 | 0.25802264  |
| phenylalanine.tyrosine           | -0.097893114 | 0.086192117 | 0.258042146 |
| pcaec424.c14                     | -0.074706896 | 0.065783957 | 0.258090036 |
| creatinine.glutamicacid          | 0.064523753  | 0.056824292 | 0.258150169 |
| glutamicacid.pcaac383            | 0.00990951   | 0.008727146 | 0.258156371 |
| c5.pcaac366                      | 0.068896385  | 0.060679533 | 0.258184399 |
| pcaec321.pcaac383                | 0.005725894  | 0.005043442 | 0.258225752 |
| pcaac420.pcaac406                | -0.059121588 | 0.052075508 | 0.258229828 |
| smc261.histidine                 | -0.062293677 | 0.054873987 | 0.258268149 |
| smc241.pcaac362                  | 0.058634544  | 0.051655774 | 0.258314817 |
| pcaec422.pcaec342                | 0.131003157  | 0.115417418 | 0.258341307 |
| pcaec362.pcaac403                | -0.004172956 | 0.003676498 | 0.258342256 |
| pcaec422.pcaec424                | 0.007782481  | 0.006856995 | 0.258369888 |

|                                |              |             |             |
|--------------------------------|--------------|-------------|-------------|
| methionine.pcaec322            | 0.046928432  | 0.041347783 | 0.258370328 |
| smohc221.c51                   | 0.046275987  | 0.040774632 | 0.258390161 |
| pcaec386.pcaac360              | 0.076923604  | 0.067781085 | 0.258406014 |
| pcaac403.pcaec364              | -0.006680219 | 0.005886468 | 0.258422561 |
| pcaec340.pcaac365              | -0.080424565 | 0.070874151 | 0.258460853 |
| pcaec342.pcaec424              | -0.034610676 | 0.030510057 | 0.258606853 |
| pcaec363.pcaac380              | 0.120273458  | 0.106036887 | 0.258666048 |
| pcaec402.pcaec423              | -0.032936868 | 0.029038742 | 0.258675139 |
| pcaec301.lysopcac204           | -0.048358303 | 0.042637641 | 0.258704183 |
| smohc241.c142                  | 0.056956526  | 0.050227139 | 0.25878368  |
| pcaec362.smohc141              | 0.045702116  | 0.040302873 | 0.258788868 |
| pcaac342.pcaec363              | -0.040000704 | 0.035277123 | 0.258817064 |
| pcaac300.pcaec340              | 0.111156431  | 0.098048324 | 0.258904433 |
| arginine.c3                    | -0.062238516 | 0.054909092 | 0.258991162 |
| asymmetricdimethylarginine.smc | -0.11382187  | 0.100442155 | 0.259106082 |
| glutamine.lysopcac180          | 0.079156167  | 0.069868613 | 0.259222963 |
| pcaac343.pcaac341              | -0.015383762 | 0.013581531 | 0.259319937 |
| smc160.lysopcac280             | -0.011020381 | 0.009729847 | 0.259345304 |
| pcaac405.pcaec362              | -0.023314402 | 0.020584948 | 0.259362862 |
| pcaec300.pcaec424              | 0.007653857  | 0.006757818 | 0.259363593 |
| c181.c8                        | -0.081098039 | 0.071607594 | 0.259388226 |
| pcaac323.c181                  | -0.022311852 | 0.019704859 | 0.259485382 |
| pcaac424.pcaac402              | -0.196280056 | 0.173360338 | 0.259524538 |
| c0.asymmetricdimethylarginine  | -0.007319336 | 0.006465702 | 0.259601429 |
| pcaac385.pcaac361              | -0.080861177 | 0.071439266 | 0.259659236 |
| lysopcac203.prolinr            | -0.029322601 | 0.02591045  | 0.259741742 |
| pcaac406.lysopcac181           | 0.024925496  | 0.022026765 | 0.259779347 |
| pcaec321.lysopcac160           | -0.015526764 | 0.01372141  | 0.259791238 |
| pcaec364.pcaac360              | 0.04542212   | 0.040141075 | 0.259795395 |
| asymmetricdimethylarginine.pca | -0.014123602 | 0.012485462 | 0.259945615 |
| pcaac366.transhydroxyproline   | 0.049696175  | 0.043936257 | 0.25999034  |
| pcaac366.asparagine            | 0.015761285  | 0.013934564 | 0.259992152 |
| pcaec446.acetylmithoine        | -0.068197309 | 0.060294835 | 0.260004299 |
| pcaec383.pcaac365              | -0.07387895  | 0.065324237 | 0.260048814 |
| smc161.c101                    | -0.012670379 | 0.011203371 | 0.260054797 |
| pcaac384.c16                   | 0.042004021  | 0.037141219 | 0.260061546 |
| pcaac420.lysopcac182           | -0.031727316 | 0.028057894 | 0.260123194 |
| pcaac360.lysopcac160           | 0.11069061   | 0.09789435  | 0.260150641 |
| citruline.pcaac365             | 0.049213716  | 0.043529176 | 0.260202459 |
| pcaec425.pcaac384              | 0.080804449  | 0.071488153 | 0.260316634 |
| c181.methionine                | -0.032117122 | 0.028414238 | 0.260317289 |
| smc241.pcaac323                | 0.089267679  | 0.078977019 | 0.26032504  |
| pcaac380.lysine                | 0.139568835  | 0.123480684 | 0.260329493 |

|                                |              |             |             |
|--------------------------------|--------------|-------------|-------------|
| pcaac426.c8                    | -0.055204558 | 0.048844445 | 0.260361906 |
| pcaac322.c8                    | -0.04680503  | 0.041415458 | 0.26039435  |
| c3.pcaec361                    | -0.009718039 | 0.008599167 | 0.260402891 |
| methioninesulfoxide.lysopcac18 | 0.105656345  | 0.093512587 | 0.260508573 |
| pcaac323.c102                  | 0.03277042   | 0.029005799 | 0.260539537 |
| pcaac401.pcaec364              | -0.007262525 | 0.006428227 | 0.260540395 |
| glutamicacid.arginine          | -0.13580748  | 0.120206518 | 0.260541174 |
| pcaac420.pcaac383              | 0.0090428    | 0.008004369 | 0.260562854 |
| pcaac281.pcaac320              | -0.062962657 | 0.055734978 | 0.260585387 |
| smc180.putrescine              | -0.031596299 | 0.027977176 | 0.260719642 |
| pcaec342.pcaec421              | 0.004050784  | 0.003587259 | 0.260780889 |
| pcaec301.h1                    | -0.004790195 | 0.004242237 | 0.260800614 |
| pcaec386.pcaec406              | -0.036308039 | 0.032156278 | 0.260823801 |
| smc161.pcaac366                | -0.043163439 | 0.038229469 | 0.260844839 |
| pcaac323.smohc161              | -0.026567791 | 0.023534441 | 0.260917193 |
| c4.smohc141                    | -0.020230893 | 0.017921683 | 0.260933905 |
| c4.pcaec361                    | -0.013138612 | 0.01163896  | 0.260934941 |
| pcaac366.pcaec404              | -0.02571375  | 0.022778869 | 0.260937188 |
| spermidine.pcaac240            | -0.052186476 | 0.046233223 | 0.260969381 |
| citruline.smohc141             | 0.011303266  | 0.010014566 | 0.261004361 |
| alanine.lysopcac204            | -0.024368254 | 0.02159162  | 0.261039992 |
| pcaec385.pcaec424              | 0.011102941  | 0.009838749 | 0.261084839 |
| c51.pcaac422                   | 0.046133888  | 0.040882271 | 0.261099172 |
| pcaac323.pcaec406              | 0.008382142  | 0.007428736 | 0.261148334 |
| pcaec321.pcaec423              | -0.008793306 | 0.007793573 | 0.261175076 |
| methioninesulfoxide.pcaec424   | -0.011555129 | 0.010241435 | 0.261176822 |
| glutamicacid.pcaec385          | 0.113432504  | 0.100569201 | 0.26133147  |
| pcaac381.pcaec404              | 0.02579316   | 0.022868728 | 0.261342371 |
| pcaac360.smc202                | 0.0531984    | 0.047170552 | 0.261380558 |
| lysopcac280.pcaec424           | 0.003357218  | 0.002977656 | 0.261514571 |
| c51dc.asymmetricdimethylargini | 0.028947581  | 0.025675048 | 0.261518951 |
| pcaac281.pcaec421              | -0.09596133  | 0.085126038 | 0.261592385 |
| pcaec300.pcaec383              | -0.065084538 | 0.057748763 | 0.261700293 |
| citruline.pcaec425             | 0.016543966  | 0.014679637 | 0.261712144 |
| c14.lysopcac280                | 0.01415733   | 0.012562335 | 0.261726707 |
| asparagine.putrescine          | -0.045900041 | 0.040731791 | 0.261761051 |
| pcaec362.serotonin             | -0.150175178 | 0.133289113 | 0.261844243 |
| c4.pcaec362                    | -0.017357316 | 0.015406887 | 0.261883408 |
| pcaac344.pcaec406              | 0.016014193  | 0.014214838 | 0.261888342 |
| histidine.alanine              | -0.047483024 | 0.042149131 | 0.261902999 |
| lysine.pcaec404                | -0.04768053  | 0.042326471 | 0.261925664 |
| acetylmithoine.pcaac425        | 0.072428053  | 0.064300621 | 0.261966531 |
| smohc161.pcaac403              | -0.006777079 | 0.006016753 | 0.261978859 |

|                       |              |             |             |
|-----------------------|--------------|-------------|-------------|
| pcaec421.pcaec406     | 0.084971741  | 0.075449511 | 0.262046965 |
| lysopcac280.pcaac426  | 0.087154702  | 0.077390246 | 0.262061715 |
| pcaac386.kynurenine   | -0.009776262 | 0.008682011 | 0.262118674 |
| c4.pcaac383           | -0.002894349 | 0.002570424 | 0.262125622 |
| c101.smc240           | 0.045590259  | 0.040488355 | 0.262130253 |
| pcaac361.pcaac421     | -0.051431832 | 0.045676219 | 0.262130336 |
| pcaac405.pcaec406     | 0.007675755  | 0.00681758  | 0.262186117 |
| pcaec301.pcaac426     | 0.089116371  | 0.079156589 | 0.262208445 |
| c181.phenylalanine    | 0.05841826   | 0.051892701 | 0.262239156 |
| c0.lysopcac280        | -0.002871445 | 0.002551023 | 0.262300536 |
| c10.c16               | 0.052721897  | 0.046839899 | 0.262312718 |
| pcaec404.pcaec380     | 0.086348903  | 0.076728102 | 0.26239224  |
| pcaac342.pcaec424     | 0.006403086  | 0.00568982  | 0.262404894 |
| smc240.pcaec405       | 0.067494072  | 0.059979606 | 0.262436376 |
| c141oh.pcaec404       | -0.03444422  | 0.030610073 | 0.262447346 |
| pcaec424.pcaac341     | 0.005606384  | 0.004983671 | 0.26257701  |
| pcaac300.c16          | 0.057130116  | 0.050796349 | 0.262687319 |
| putrescine.pcaec322   | 0.051926817  | 0.046176964 | 0.262759822 |
| pcaec341.pcaac403     | -0.020227518 | 0.017989443 | 0.262805163 |
| pcaec341.pcaac383     | 0.005065725  | 0.004506318 | 0.262920141 |
| pcaec424.pcaec406     | 0.006126037  | 0.005450065 | 0.262965918 |
| lysopcac281.pcaac323  | -0.168336229 | 0.14979466  | 0.263071699 |
| pcaac320.pcaec424     | 0.005207088  | 0.004633971 | 0.263115116 |
| lysopcac203.pcaec365  | 0.025238277  | 0.022462554 | 0.263160001 |
| c18.pcaac403          | 0.005565687  | 0.00495372  | 0.263174467 |
| pcaec343.pcaac383     | 0.005909841  | 0.005261343 | 0.263292827 |
| smc241.pcaac363       | -0.009353364 | 0.008327753 | 0.263335685 |
| pcaec401.smc202       | 0.049624659  | 0.044196858 | 0.263482184 |
| c101.pcaec365         | -0.020275516 | 0.018058157 | 0.263490579 |
| pcaec402.smohc241     | 0.081186276  | 0.072309688 | 0.263504085 |
| pcaec386.pcaac403     | -0.005447919 | 0.004853472 | 0.263622293 |
| lysopcac204.histidine | -0.082010594 | 0.073064986 | 0.263641417 |
| pcaac363.smohc141     | -0.047259895 | 0.04210823  | 0.263679598 |
| c101.pcaec423         | -0.016618925 | 0.014807637 | 0.263689023 |
| lysopcac161.c10       | 0.013552776  | 0.012075715 | 0.263690934 |
| pcaec422.pcaac341     | 0.006205406  | 0.00552991  | 0.263760187 |
| methionine.taurine    | -0.037721809 | 0.033622332 | 0.263855911 |
| pcaac404.pcaac381     | 0.04416026   | 0.039364557 | 0.263897981 |
| pcaec422.alanine      | -0.025113923 | 0.022391215 | 0.263995799 |
| pcaac323.alanine      | -0.020153732 | 0.017968983 | 0.26400118  |
| asparagine.pcaec380   | -0.085117648 | 0.075893764 | 0.26402139  |
| lysopcac170.citruline | 0.038293349  | 0.034146013 | 0.264054415 |
| glycine.pcaec363      | 0.016100688  | 0.014357122 | 0.264061316 |



|                                 |              |             |             |
|---------------------------------|--------------|-------------|-------------|
| pcaec340.lysopcac203            | 0.01378148   | 0.012291453 | 0.264153736 |
| pcaac403.pcaec401               | 0.076189532  | 0.067953754 | 0.26416553  |
| c8.pcaac386                     | 0.026276691  | 0.023444378 | 0.264329641 |
| c0.pcaec423                     | 0.044466983  | 0.039684201 | 0.264452202 |
| lysopcac203.c3                  | -0.05779888  | 0.051589799 | 0.264522767 |
| lysine.pcaec444                 | 0.196101048  | 0.175068957 | 0.264615637 |
| pcaac425.prolinr                | -0.053916061 | 0.048135167 | 0.264632167 |
| glutamicacid.pcaec322           | -0.086860369 | 0.077553604 | 0.264671581 |
| pcaac384.pcaac380               | 0.064022923  | 0.057165264 | 0.26468954  |
| pcaec402.pcaec322               | -0.092385233 | 0.082496501 | 0.264729244 |
| smc161.putrescine               | -0.037659004 | 0.033629687 | 0.264752276 |
| pcaec405.pcaac361               | 0.05230074   | 0.046705226 | 0.264756264 |
| pcaec385.pcaec301               | 0.099954654  | 0.089264243 | 0.264774732 |
| asymmetricdimethylarginine.pca  | -0.004681955 | 0.004182071 | 0.264872931 |
| histidine.pcaac361              | 0.049720988  | 0.044416503 | 0.264917223 |
| acetylmithoine.smc202           | -0.066752767 | 0.059639244 | 0.264981017 |
| pcaec420.smohc221               | 0.139391889  | 0.124559126 | 0.265063371 |
| smc241.valine                   | -0.099139042 | 0.088593411 | 0.265083806 |
| pcaac281.pcaec363               | -0.038136787 | 0.034081393 | 0.265101913 |
| creatinine.pcaac321             | -0.034076943 | 0.030456333 | 0.265149834 |
| smc260.pcaac406                 | -0.038304117 | 0.034235909 | 0.265171104 |
| isoleucine.histidine            | 0.107331888  | 0.095936948 | 0.265193812 |
| c12.pcaec406                    | -0.006846263 | 0.006119447 | 0.265195363 |
| pcaec444.pcaec424               | 0.011679165  | 0.01044081  | 0.265265306 |
| serine.smc161                   | 0.087535246  | 0.078281963 | 0.265436588 |
| pcaac341.pcaac422               | -0.035721486 | 0.031949591 | 0.265499076 |
| smc181.pcaec360                 | 0.010881413  | 0.009733118 | 0.265532922 |
| arginine.pcaec423               | 0.021226444  | 0.018987585 | 0.265561192 |
| c16.pcaec420                    | -0.041011398 | 0.03668743  | 0.265583368 |
| smc260.c16                      | 0.06464064   | 0.057825909 | 0.265587855 |
| c16.asparagine                  | 0.014339612  | 0.01282829  | 0.265603791 |
| asymmetricdimethylarginine.alpl | 0.011776693  | 0.01053679  | 0.265662528 |
| asparagine.c16                  | -0.068126738 | 0.060964263 | 0.265742248 |
| alanine.pcaec406                | 0.004151276  | 0.003714846 | 0.265743854 |
| glycine.h1                      | 0.004040556  | 0.003615792 | 0.265747233 |
| pcaac342.alanine                | -0.018238254 | 0.016321155 | 0.265753066 |
| pcaac342.prolinr                | 0.033413231  | 0.02990366  | 0.265795003 |
| asparagine.transhydroxyproline  | -0.029029102 | 0.025985438 | 0.265894242 |
| pcaac422.pcaec405               | -0.13049405  | 0.116815124 | 0.265907301 |
| pcaac240.smohc161               | -0.062389215 | 0.055849636 | 0.265910005 |
| asparagine.leucine              | -0.00846665  | 0.007579577 | 0.265934686 |
| pcaac300.pcaec401               | 0.09322148   | 0.083455723 | 0.265942113 |
| pcaac381.pcaec422               | -0.041914306 | 0.03752399  | 0.265949351 |

|                                 |              |             |             |
|---------------------------------|--------------|-------------|-------------|
| c101.pcaac380                   | -0.050425307 | 0.045145151 | 0.265966694 |
| pcaec402.pcaec342               | 0.100241869  | 0.089758448 | 0.266036408 |
| pcaec444.pcaec404               | 0.024121706  | 0.021602286 | 0.266108207 |
| pcaac321.pcaec343               | 0.120920511  | 0.108294761 | 0.266125497 |
| pcaec322.c102                   | 0.035607728  | 0.031890066 | 0.266129534 |
| lysopcac140.lysopcac170         | 0.024525542  | 0.021970248 | 0.266244806 |
| pcaac320.pcaac383               | 0.006086518  | 0.005452723 | 0.266275644 |
| pcaac424.pcaac385               | -0.026339206 | 0.023597703 | 0.26630039  |
| pcaac320.pcaec406               | 0.010134013  | 0.009079772 | 0.266329356 |
| c51dc.c141oh                    | -0.126104778 | 0.112987117 | 0.266333636 |
| c142.pcaac403                   | 0.00597656   | 0.005355071 | 0.266351731 |
| lysopcac182.smohc141            | 0.012217351  | 0.010949297 | 0.266456171 |
| pcaac365.pcaec446               | -0.066308069 | 0.059430292 | 0.266491581 |
| pcaec362.pcaec424               | 0.010113147  | 0.009064171 | 0.266491901 |
| pcaec402.pcaac421               | -0.057062373 | 0.051150191 | 0.266552905 |
| serine.pcaec385                 | -0.053729423 | 0.048165084 | 0.266577813 |
| c101.arginine                   | 0.035236071  | 0.031588804 | 0.266605821 |
| pcaac403.creatinine             | -0.014681297 | 0.013162246 | 0.266627633 |
| alphaaminoadipicacid.c141       | -0.027213501 | 0.024398462 | 0.266641266 |
| alphaaminoadipicacid.c51dc      | -0.163161096 | 0.146285284 | 0.266647834 |
| glutamicacid.pcaac403           | 0.009525878  | 0.008542301 | 0.26674191  |
| pcaac403.c2                     | 0.142422482  | 0.127728543 | 0.266785286 |
| lysopcac181.lysopcac180         | -0.140347685 | 0.125875901 | 0.266815906 |
| pcaac360.c181                   | -0.027984041 | 0.025099411 | 0.266833193 |
| pcaec380.pcaac421               | -0.150232275 | 0.134752286 | 0.266854891 |
| pcaec360.pcaac360               | -0.055929969 | 0.050167062 | 0.266856196 |
| lysopcac161.smc241              | -0.084425246 | 0.075727498 | 0.26686407  |
| glycine.pcaac384                | 0.081422207  | 0.073044599 | 0.266934205 |
| pcaec421.pcaac281               | -0.004765006 | 0.004274826 | 0.266944929 |
| phenylalanine.transhydroxyproli | -0.04537948  | 0.040713688 | 0.266973337 |
| lysopcac281.pcaec406            | 0.004339892  | 0.003893763 | 0.266983917 |
| methioninesulfoxide.creatinine  | -0.01875528  | 0.016827678 | 0.266994921 |
| isoleucine.c51dc                | -0.182373445 | 0.16363705  | 0.267016216 |
| pcaec422.pcaac300               | -0.067067013 | 0.060177973 | 0.267025591 |
| glycine.pcaec386                | 0.015328653  | 0.013754866 | 0.267051665 |
| asymmetricdimethylarginine.pca  | 0.005802042  | 0.005206567 | 0.267071706 |
| c51dc.pcaac420                  | -0.090068809 | 0.080834279 | 0.267127071 |
| pcaac321.asymmetricdimethylar;  | 0.042292717  | 0.037957088 | 0.267133821 |
| smohc161.pcaec424               | 0.012642446  | 0.011346576 | 0.267140827 |
| pcaec406.pcaac240               | -0.022769278 | 0.020437277 | 0.267184775 |
| lysopcac204.pcaec380            | -0.081839567 | 0.073464334 | 0.267228035 |
| c181.smc202                     | -0.056818259 | 0.051029221 | 0.267466866 |
| smc180.glutamine                | -0.017601056 | 0.015807928 | 0.26747258  |

|                         |              |             |             |
|-------------------------|--------------|-------------|-------------|
| h1.smohc141             | -0.034703022 | 0.031171719 | 0.267535344 |
| pcaac383.c14            | 0.042046397  | 0.037768218 | 0.267539999 |
| c142.arginine           | 0.034410371  | 0.030910652 | 0.267563156 |
| lysopcac181.valine      | -0.101894172 | 0.091540056 | 0.267610329 |
| pcaec446.pcaec383       | -0.070169384 | 0.063049689 | 0.267690893 |
| pcaec362.phenylalanine  | 0.048472049  | 0.043556103 | 0.26771542  |
| pcaac403.lysopcac160    | 0.065344894  | 0.058720113 | 0.267734706 |
| c101.c3                 | 0.051878805  | 0.046628041 | 0.267824621 |
| arginine.c181           | 0.020717715  | 0.01862431  | 0.267913605 |
| pcaec301.pcaac420       | -0.083571011 | 0.075128857 | 0.267927644 |
| c181.pcaac403           | 0.00527267   | 0.004740257 | 0.267949761 |
| pcaac424.pcaac363       | -0.017155958 | 0.015424167 | 0.267966722 |
| pcaac380.lysopcac161    | 0.119575902  | 0.107515095 | 0.268009529 |
| pcaac426.smohc141       | -0.014081801 | 0.012662984 | 0.268066667 |
| lysopcac280.pcaac361    | 0.08892068   | 0.07999412  | 0.268261315 |
| lysopcac140.c16         | -0.11278767  | 0.10148212  | 0.268340983 |
| c18.c8                  | -0.067796697 | 0.061001899 | 0.268348567 |
| c181.pcaec360           | -0.009603047 | 0.00864078  | 0.26835851  |
| c162.pcaac385           | 0.043103068  | 0.038784109 | 0.268360428 |
| pcaac402.pcaac341       | 0.007823733  | 0.007040132 | 0.268383652 |
| pcaec322.pcaac406       | -0.046094049 | 0.041478062 | 0.268391108 |
| lysopcac160.lysopcac280 | 0.0165054    | 0.014852739 | 0.268398706 |
| pcaac361.h1             | 0.002507971  | 0.002256951 | 0.268419722 |
| pcaec340.pcaec424       | 0.00524149   | 0.004717637 | 0.268496637 |
| isoleucine.glutamine    | 0.030067379  | 0.02706376  | 0.26852164  |
| smohc221.pcaac406       | -0.049202948 | 0.044296755 | 0.268618452 |
| pcaac383.pcaac403       | -0.005868836 | 0.005283884 | 0.26864091  |
| smohc141.pcaec360       | -0.011162138 | 0.010049878 | 0.268654243 |
| c142.lysopcac181        | -0.06196256  | 0.055788373 | 0.268655269 |
| pcaac343.smc181         | -0.010640295 | 0.009581187 | 0.268711528 |
| pcaac361.pcaec362       | -0.046415043 | 0.041800275 | 0.268771625 |
| pcaec363.h1             | 0.006272303  | 0.005649609 | 0.26884951  |
| smc241.smc240           | 0.09005077   | 0.081120168 | 0.26890445  |
| pcaec444.pcaec322       | 0.065091778  | 0.058637289 | 0.268911402 |
| smc161.pcaec424         | 0.009153165  | 0.008246894 | 0.268989721 |
| pcaac384.smc202         | 0.058147392  | 0.052400818 | 0.269087092 |
| pcaec382.pcaec364       | -0.005682251 | 0.005120689 | 0.269087265 |
| lysopcac204.lysopcac182 | 0.042096512  | 0.037939404 | 0.269127216 |
| pcaac344.methionine     | -0.032890624 | 0.029644618 | 0.269159432 |
| ornithine.lysopcac180   | 0.053681377  | 0.048387236 | 0.269196115 |
| pcaac300.tyrosine       | 0.058408445  | 0.052648983 | 0.269204004 |
| pcaac403.c14            | 0.078670798  | 0.07091485  | 0.269214197 |
| smohc222.c51dc          | -0.149745929 | 0.134987134 | 0.269229255 |

|                                |              |             |             |
|--------------------------------|--------------|-------------|-------------|
| pcaac405.c181                  | -0.014901651 | 0.013434417 | 0.269280926 |
| pcaac383.smc161                | -0.057252848 | 0.05162439  | 0.269361503 |
| lysopcac182.pcaac384           | 0.052087074  | 0.046968158 | 0.269378775 |
| c141.pcaec445                  | 0.055791665  | 0.050309723 | 0.26938869  |
| pcaac323.pcaac406              | -0.035280374 | 0.031814317 | 0.269396168 |
| pcaac343.pcaac406              | -0.050389775 | 0.045450121 | 0.269509467 |
| pcaec322.c51                   | 0.068986159  | 0.062223628 | 0.269510274 |
| leucine.pcaec402               | 0.046232668  | 0.041704868 | 0.269559053 |
| pcaac365.pcaac344              | -0.10968846  | 0.098949641 | 0.269576053 |
| pcaec380.asparticacid          | -0.049771421 | 0.044901111 | 0.269602134 |
| pcaac361.pcaec424              | 0.003539928  | 0.003193938 | 0.269662473 |
| asparagine.smc240              | -0.116951383 | 0.1055452   | 0.269773496 |
| smc181.lysopcac204             | 0.047462042  | 0.042851776 | 0.269981311 |
| smohc222.pcaac322              | -0.062281702 | 0.056233108 | 0.269991429 |
| c3.pcaec342                    | -0.084225004 | 0.076050471 | 0.270023547 |
| pcaac385.pcaec425              | 0.010352657  | 0.009348359 | 0.270048449 |
| glutamine.pcaac360             | -0.043019768 | 0.038847329 | 0.270058935 |
| pcaac426.leucine               | -0.015196031 | 0.013723244 | 0.27009574  |
| asparticacid.pcaec321          | 0.025293632  | 0.022845476 | 0.270164245 |
| pcaac342.c2                    | -0.090022423 | 0.081309377 | 0.27016527  |
| c181.c5                        | -0.00791341  | 0.007147528 | 0.270167715 |
| pcaec405.pcaac383              | 0.007852744  | 0.007093023 | 0.270187179 |
| pcaac405.asparticacid          | 0.038967718  | 0.03519973  | 0.270214048 |
| lysopcac182.pcaec384           | 0.051252082  | 0.046298977 | 0.270242082 |
| pcaec322.pcaec423              | -0.011070815 | 0.01000186  | 0.270287398 |
| lysopcac181.c101               | -0.010388494 | 0.009385437 | 0.270288248 |
| pcaec365.pcaac300              | -0.072372965 | 0.065385157 | 0.270289223 |
| pcaac383.phenylalanine         | -0.068132521 | 0.0615605   | 0.270338498 |
| alphaaminoadipicacid.pcaac405  | -0.065510008 | 0.059192501 | 0.270350971 |
| c5.pcaec385                    | 0.105446066  | 0.095279257 | 0.270360791 |
| smc202.c101                    | 0.027643459  | 0.024979781 | 0.270391828 |
| pcaac363.pcaec322              | 0.058590862  | 0.052945413 | 0.270394264 |
| pcaec360.pcaac422              | -0.073568693 | 0.066480377 | 0.270396429 |
| leucine.smc180                 | -0.013913761 | 0.01257425  | 0.270437212 |
| pcaec385.pcaac366              | -0.03762242  | 0.034007474 | 0.270536152 |
| pcaac364.pcaac402              | -0.066280366 | 0.059919043 | 0.270593617 |
| smc161.asparagine              | 0.017720719  | 0.016021039 | 0.270625869 |
| pcaac401.asymmetricdimethylar; | 0.04491877   | 0.040611474 | 0.270638568 |
| pcaac344.pcaac321              | -0.065158832 | 0.058920762 | 0.270720028 |
| c3.pcaac403                    | 0.009453497  | 0.008550602 | 0.270839908 |
| histidine.c8                   | -0.069099287 | 0.062502508 | 0.27086152  |
| pcaac381.pcaec405              | 0.119558263  | 0.108145311 | 0.270866153 |
| pcaac405.pcaac360              | 0.038000914  | 0.034375745 | 0.270899076 |

|                       |              |             |             |
|-----------------------|--------------|-------------|-------------|
| smc180.c101           | -0.048858682 | 0.044222557 | 0.271167157 |
| histidine.taurine     | -0.032324175 | 0.029263585 | 0.271274801 |
| smc160.pcaac281       | 0.003020871  | 0.002734896 | 0.271284202 |
| pcaac420.pcaac364     | -0.017854206 | 0.016167397 | 0.271384097 |
| pcaac385.pcaac301     | 0.084744013  | 0.076751236 | 0.27146847  |
| pcaac362.pcaac363     | -0.024704324 | 0.022376893 | 0.271523923 |
| pcaac404.c5           | -0.041333474 | 0.037447735 | 0.271630318 |
| pcaac405.lysopcac181  | 0.029712202  | 0.0269197   | 0.271643209 |
| pcaac401.lysopcac182  | -0.068676694 | 0.062225193 | 0.271666834 |
| pcaac300.pcaac366     | 0.034156301  | 0.03094787  | 0.271670188 |
| c4.c101               | 0.050681053  | 0.045922219 | 0.271689214 |
| pcaac421.pcaac380     | 0.064591423  | 0.058530638 | 0.271723455 |
| pcaac323.c3           | 0.050852667  | 0.046095141 | 0.27186963  |
| pcaac320.pcaac425     | 0.021909683  | 0.01985998  | 0.271871069 |
| pcaac425.c101         | 0.013932838  | 0.012633016 | 0.272008167 |
| c12.pcaac403          | 0.026073857  | 0.023642192 | 0.272024641 |
| smc180.pcaac424       | 0.006842997  | 0.006204889 | 0.272030387 |
| smc160.pcaac380       | -0.037961609 | 0.034424974 | 0.272075799 |
| spermidine.pcaac300   | -0.255415494 | 0.231631774 | 0.272099852 |
| pcaac362.pcaac446     | -0.047490647 | 0.043083998 | 0.272272426 |
| creatinine.pcaac403   | 0.033844227  | 0.030708642 | 0.272347292 |
| pcaac382.pcaac444     | -0.260667294 | 0.236533968 | 0.272381322 |
| histidine.smohc221    | -0.068146569 | 0.061839802 | 0.272400146 |
| methionine.smc160     | 0.103007809  | 0.093478027 | 0.272416951 |
| smc240.pcaac423       | -0.021141839 | 0.019186809 | 0.272439605 |
| pcaac342.pcaac382     | -0.019682724 | 0.017863347 | 0.272458976 |
| lysopcac281.pcaac426  | 0.091361165  | 0.082920963 | 0.272486557 |
| smohc141.pcaac380     | -0.043082659 | 0.039111779 | 0.272599086 |
| c101.c2               | 0.062683945  | 0.056917812 | 0.272694515 |
| pcaac365.pcaac403     | -0.003597122 | 0.003266373 | 0.272715079 |
| c12.c3                | 0.053772027  | 0.048844321 | 0.272876792 |
| c5.c181               | -0.035951636 | 0.032661619 | 0.272944279 |
| glutamicacid.pcaac340 | -0.079237589 | 0.07198646  | 0.272944839 |
| pcaac363.smohc222     | -0.005668071 | 0.005150459 | 0.273044995 |
| c4.smohc222           | 0.012573723  | 0.011425512 | 0.273046232 |
| arginine.pcaac403     | -0.00795809  | 0.007231389 | 0.273047501 |
| smc261.pcaac360       | -0.048615456 | 0.044181824 | 0.273109455 |
| pcaac341.pcaac360     | 0.053861581  | 0.048951321 | 0.273127095 |
| lysine.pcaac364       | -0.018340354 | 0.01666966  | 0.273164164 |
| glutamine.c101        | -0.01330163  | 0.012091085 | 0.273209698 |
| lysopcac170.pcaac380  | -0.040060458 | 0.036418685 | 0.273262384 |
| pcaac385.pcaac424     | 0.00566301   | 0.005149284 | 0.27336263  |
| pcaac446.prolinr      | 0.025181303  | 0.022902412 | 0.273476469 |

|                                |              |             |             |
|--------------------------------|--------------|-------------|-------------|
| kynurenine.lysopcac203         | -0.031146313 | 0.028328915 | 0.273498766 |
| c18.pcaac341                   | 0.009231373  | 0.008396981 | 0.27353565  |
| pcaac300.pcaec424              | 0.004625438  | 0.004207998 | 0.273607969 |
| pcaac384.pcaec424              | 0.004894712  | 0.004453134 | 0.273625614 |
| c0.smohc141                    | -0.02615621  | 0.023797533 | 0.273645939 |
| pcaac360.leucine               | -0.017882658 | 0.016270986 | 0.273673079 |
| pcaac401.glutamicacid          | 0.105948161  | 0.096400481 | 0.273677454 |
| pcaac363.pcaac420              | -0.079081028 | 0.07197613  | 0.273820887 |
| c4.pcaac321                    | -0.017804221 | 0.016206051 | 0.273862743 |
| pcaac343.pcaec382              | 0.019273866  | 0.017544068 | 0.273870688 |
| serotonin.pcaac360             | -0.029127032 | 0.026516157 | 0.273928864 |
| pcaec422.serotonin             | -0.123383872 | 0.112331902 | 0.273962263 |
| smc241.asparagine              | -0.010066132 | 0.009165305 | 0.274005828 |
| c12.smohc141                   | -0.050702731 | 0.046167631 | 0.274029937 |
| pcaac385.pcaec322              | 0.077153446  | 0.070269316 | 0.274144514 |
| pcaac323.c18                   | -0.021756297 | 0.019816553 | 0.274180519 |
| glycine.pcaec360               | -0.009574954 | 0.00872134  | 0.27418426  |
| pcaec382.pcaac403              | -0.018254412 | 0.01662742  | 0.274195804 |
| pcaec361.smohc221              | -0.093364591 | 0.085044181 | 0.274201727 |
| asparagine.smohc241            | 0.086549971  | 0.078839206 | 0.274215926 |
| c10.pcaec363                   | -0.020385227 | 0.018572484 | 0.274302981 |
| smohc241.pcaec343              | -0.071892779 | 0.065502112 | 0.274320123 |
| pcaac344.pcaec444              | 0.102189875  | 0.093129267 | 0.274439257 |
| pcaec383.pcaec401              | 0.133675697  | 0.121854173 | 0.274559879 |
| c102.pcaec362                  | 0.028025277  | 0.025550473 | 0.274627085 |
| c102.creatinine                | -0.026004746 | 0.023715022 | 0.274761199 |
| pcaec422.pcaac403              | -0.014572838 | 0.013290671 | 0.274796257 |
| pcaec444.pcaac383              | 0.00450659   | 0.004110642 | 0.274860943 |
| pcaac364.smohc141              | -0.07036011  | 0.064179981 | 0.27487361  |
| smc241.lysopcac182             | -0.057524109 | 0.052472951 | 0.274887387 |
| c0.pcaec360                    | 0.006974426  | 0.006362237 | 0.27490475  |
| pcaac401.pcaec423              | 0.097352882  | 0.088817621 | 0.274958621 |
| lysopcac280.pcaec403           | -0.021085605 | 0.019237655 | 0.274975958 |
| pcaac401.c18                   | 0.051540763  | 0.047029922 | 0.275039049 |
| asymmetricdimethylarginine.pca | -0.010140013 | 0.009252812 | 0.275052052 |
| pcaec423.pcaac406              | -0.053518225 | 0.048848218 | 0.275175088 |
| ornithine.lysopcac170          | -0.031218719 | 0.02850211  | 0.275301556 |
| pcaac343.transhydroxyproline   | 0.023362244  | 0.021330658 | 0.275332112 |
| smc241.smohc141                | -0.026440801 | 0.02414156  | 0.275333247 |
| pcaac385.spermidine            | -0.079293757 | 0.07240468  | 0.275373871 |
| pcaac365.c142                  | 0.02888582   | 0.02637879  | 0.275420676 |
| pcaec380.lysopcac161           | 0.072898047  | 0.06658642  | 0.27553031  |
| pcaac364.leucine               | -0.006233918 | 0.005695093 | 0.275607292 |

|                                 |              |             |             |
|---------------------------------|--------------|-------------|-------------|
| pcaec342.smohe222               | -0.007403479 | 0.006765797 | 0.275765174 |
| pcaac385.pcaec406               | 0.010401748  | 0.0095066   | 0.27580451  |
| pcaac341.kynurenine             | -0.020789975 | 0.019002601 | 0.275848771 |
| pcaec321.pcaec363               | -0.045558877 | 0.041644666 | 0.275878809 |
| c2.pcaac281                     | 0.017556512  | 0.016049996 | 0.2759342   |
| lysopcac180.c51                 | -0.07770837  | 0.071043529 | 0.275956265 |
| lysopcac140.putrescine          | -0.042801347 | 0.039132597 | 0.275983247 |
| pcaac342.pcaec406               | 0.005503203  | 0.005031699 | 0.276002959 |
| c5.c51                          | 0.05897823   | 0.053926377 | 0.276014376 |
| pcaec404.pcaac322               | -0.102260312 | 0.093503346 | 0.276025972 |
| pcaec385.asparagine             | -0.039128328 | 0.035777684 | 0.276026952 |
| smc260.pcaac425                 | 0.103408336  | 0.094556774 | 0.276044752 |
| pcaec363.pcaec322               | 0.091053801  | 0.08326285  | 0.276062471 |
| pcaac404.smc180                 | -0.014261789 | 0.013045514 | 0.276209999 |
| pcaec422.c141oh                 | -0.108328059 | 0.099099559 | 0.276257968 |
| smc260.putrescine               | -0.019665687 | 0.017991881 | 0.276298373 |
| glutamicacid.pcaec380           | 0.069632188  | 0.06370634  | 0.276304053 |
| lysopcac181.pcaec423            | -0.048505302 | 0.044379281 | 0.27632435  |
| c2.pcaec404                     | -0.034262546 | 0.031349253 | 0.276342537 |
| pcaac281.valine                 | -0.048536776 | 0.044415117 | 0.276400148 |
| pcaac321.pcaec445               | 0.032868714  | 0.030079368 | 0.276428888 |
| pcaec340.pcaec421               | 0.001656034  | 0.001515685 | 0.276488146 |
| pcaec425.pcaec363               | 0.041843341  | 0.038299606 | 0.276519139 |
| asymmetricdimethylarginine.vali | -0.06735995  | 0.061657935 | 0.276540351 |
| c18.pcaac385                    | -0.047570719 | 0.04354751  | 0.276580428 |
| pcaac362.pcaac403               | -0.004118735 | 0.003770831 | 0.276634955 |
| lysopcac181.pcaac420            | -0.1104465   | 0.101122683 | 0.276660828 |
| pcaec402.pcaac422               | -0.076866166 | 0.070389825 | 0.27674677  |
| ornithine.serine                | -0.028152654 | 0.025781352 | 0.276759628 |
| pcaac240.pcaac361               | -0.027608571 | 0.02528327  | 0.276762908 |
| pcaac386.pcaec402               | 0.040760643  | 0.03733603  | 0.276870605 |
| pcaec402.pcaec321               | 0.040374017  | 0.036985297 | 0.276914695 |
| smc181.pcaac344                 | 0.075571157  | 0.06925432  | 0.277094928 |
| serotonin.arginine              | 0.032350396  | 0.029646597 | 0.277099829 |
| pcaec362.smc180                 | -0.010043887 | 0.009204943 | 0.277126298 |
| pcaec361.lysopcac160            | 0.081791661  | 0.074964593 | 0.277157008 |
| pcaac405.pcaac380               | 0.051634401  | 0.047325197 | 0.277163753 |
| pcaac366.pcaac322               | -0.098240552 | 0.090054181 | 0.277229627 |
| pcaac322.transhydroxyproline    | 0.024879307  | 0.022807102 | 0.277250274 |
| pcaac364.glycine                | 0.025896215  | 0.023742572 | 0.277315959 |
| pcaac341.pcaec424               | 0.00425288   | 0.003899973 | 0.277411836 |
| pcaac300.glutamicacid           | 0.050111264  | 0.045953611 | 0.277418196 |
| lysopcac280.kynurenine          | 0.041400987  | 0.037967806 | 0.277440799 |

|                                |              |             |             |
|--------------------------------|--------------|-------------|-------------|
| pcaec300.pcaac422              | -0.015250475 | 0.013985891 | 0.277442953 |
| pcaec401.smc160                | -0.050323892 | 0.046151633 | 0.277449656 |
| c18.lysopcac182                | -0.022720151 | 0.020840591 | 0.277544366 |
| methioninesulfoxide.pcaec322   | -0.080237998 | 0.073611082 | 0.277615195 |
| pcaac384.putrescine            | -0.036678177 | 0.033650368 | 0.277636086 |
| asparagine.pcaec364            | 0.024400694  | 0.022386671 | 0.277641879 |
| ornithine.pcaec322             | 0.082594177  | 0.075781991 | 0.277674095 |
| smc202.tyrosine                | -0.093494892 | 0.085789802 | 0.277708466 |
| putrescine.h1                  | 0.002955776  | 0.002712741 | 0.277806634 |
| methionine.pcaac426            | -0.040050959 | 0.036759053 | 0.277822621 |
| pcaac365.c16                   | 0.043312621  | 0.039754373 | 0.277843593 |
| pcaec382.pcaac385              | -0.033570342 | 0.03081563  | 0.277893007 |
| pcaec425.lysopcac203           | 0.02963564   | 0.027205688 | 0.277926185 |
| c14.lysopcac180                | -0.053516312 | 0.049134635 | 0.277988053 |
| pcaec404.pcaec342              | 0.097015637  | 0.089073003 | 0.277991137 |
| pcaec361.c101                  | -0.042555148 | 0.039071584 | 0.277996154 |
| pcaac341.alanine               | -0.028610122 | 0.026269766 | 0.278026554 |
| c142.pcaac300                  | 0.051378058  | 0.047186288 | 0.278138532 |
| glutamicacid.pcaec425          | -0.027387664 | 0.025154169 | 0.278157116 |
| pcaac404.c141                  | -0.066521519 | 0.061099797 | 0.278182036 |
| lysopcac204.smohc161           | 0.033499673  | 0.030772032 | 0.278223902 |
| pcaec380.smc202                | 0.082877115  | 0.07613586  | 0.278266908 |
| pcaac424.pcaac365              | -0.0766487   | 0.070428755 | 0.278366719 |
| pcaec422.pcaac344              | -0.055938289 | 0.051416918 | 0.278533825 |
| c3.ornithine                   | -0.032655478 | 0.030017208 | 0.278552986 |
| c142.pcaac422                  | 0.023263525  | 0.021385331 | 0.27858188  |
| pcaac363.leucine               | -0.010219315 | 0.009394423 | 0.278590542 |
| pcaec445.serine                | -0.010262639 | 0.009434826 | 0.278619755 |
| lysopcac180.pcaec364           | -0.017835548 | 0.016397917 | 0.278649935 |
| pcaac281.smohc221              | 0.037463707  | 0.034445531 | 0.27867188  |
| lysopcac182.lysopcac181        | -0.077682595 | 0.07142837  | 0.278699305 |
| prolinr.pcaec406               | 0.00284187   | 0.002613199 | 0.278722672 |
| kynurenine.asymmetricdimethyl: | 0.028563152  | 0.026266013 | 0.278744499 |
| lysopcac182.h1                 | -0.003596094 | 0.003306986 | 0.278759073 |
| smohc241.pcaec382              | 0.022961132  | 0.021115852 | 0.278774577 |
| pcaac300.c101                  | -0.009228684 | 0.008487959 | 0.278827689 |
| pcaac341.pcaac380              | 0.065731594  | 0.060459551 | 0.278857721 |
| c141.pcaac381                  | -0.013117696 | 0.012065735 | 0.278863736 |
| pcaac366.creatinine            | -0.013134384 | 0.012082369 | 0.278914616 |
| smohc141.pcaac406              | -0.042145574 | 0.038771145 | 0.278930356 |
| smc260.smohc161                | -0.016327608 | 0.015020405 | 0.278933004 |
| pcaec423.pcaec382              | -0.02271632  | 0.020898096 | 0.278943678 |
| serotonin.pcaac381             | 0.039006495  | 0.035892467 | 0.279051297 |



|                                |              |             |             |
|--------------------------------|--------------|-------------|-------------|
| pcaec406.c102                  | 0.040088204  | 0.036888693 | 0.279062641 |
| glycine.pcaac320               | -0.015530347 | 0.014290964 | 0.279066706 |
| pcaec364.pcaec363              | -0.061935616 | 0.056994362 | 0.279078913 |
| smc202.pcaec361                | -0.008450242 | 0.00777668  | 0.279115973 |
| pcaec382.lysopcac203           | 0.018874091  | 0.017369831 | 0.279120921 |
| lysopcac161.smc240             | -0.037050186 | 0.034105572 | 0.279237098 |
| pcaac405.valine                | -0.053839456 | 0.049563534 | 0.27926648  |
| pcaac366.pcaac385              | -0.057291893 | 0.052742144 | 0.279269796 |
| arginine.pcaec404              | -0.043193758 | 0.039770621 | 0.279354421 |
| pcaec422.transhydroxyproline   | 0.046425294  | 0.042746616 | 0.279360709 |
| methionine.pcaec364            | 0.012408333  | 0.011425158 | 0.279362576 |
| pcaec425.pcaac341              | 0.004933657  | 0.004542877 | 0.279377228 |
| pcaac420.asparagine            | -0.01509284  | 0.013897735 | 0.27938936  |
| lysopcac182.lysopcac204        | -0.020887242 | 0.01923479  | 0.279426047 |
| smc160.c141                    | 0.029626329  | 0.027283143 | 0.279437309 |
| lysopcac161.pcaac380           | 0.058284931  | 0.053675612 | 0.27944188  |
| pcaac366.smohe221              | 0.067991994  | 0.06262108  | 0.279488251 |
| pcaec386.pcaac323              | 0.125982347  | 0.116037544 | 0.279516973 |
| alphaaminoadipicacid.pcaec382  | -0.009481695 | 0.008733704 | 0.279543042 |
| pcaec384.ornithine             | 0.043835521  | 0.040381428 | 0.279590466 |
| smc260.c51                     | 0.043567192  | 0.040144644 | 0.279714536 |
| kynurenine.pcaac380            | -0.056627113 | 0.05217973  | 0.279724864 |
| lysopcac182.pcaec383           | -0.069006645 | 0.063587757 | 0.279730582 |
| smc260.pcaac422                | -0.016847391 | 0.015524494 | 0.27973303  |
| pcaac300.pcaac341              | -0.012729274 | 0.011730931 | 0.27978159  |
| pcaec420.pcaac363              | -0.020070132 | 0.01849719  | 0.279810997 |
| pcaec446.pcaac403              | -0.004279784 | 0.003944819 | 0.279865857 |
| pcaac420.pcaec406              | 0.018659806  | 0.017199885 | 0.279880346 |
| asymmetricdimethylarginine.pca | 0.03014507   | 0.027791066 | 0.279958067 |
| lysopcac160.smc181             | -0.010442296 | 0.009626866 | 0.279958087 |
| pcaac344.c51                   | 0.085537565  | 0.078859416 | 0.279966627 |
| pcaac403.pcaec340              | -0.061825919 | 0.057010006 | 0.280059052 |
| creatinine.c51dc               | -0.149244269 | 0.137622593 | 0.28007181  |
| pcaec425.alanine               | -0.015546002 | 0.014336293 | 0.280100586 |
| pcaec301.pcaac323              | 0.076971603  | 0.07098431  | 0.280115655 |
| pcaec402.pcaac402              | -0.114418552 | 0.105536304 | 0.28019681  |
| pcaac406.pcaac381              | -0.019683965 | 0.018157629 | 0.280242161 |
| pcaec402.glutamicacid          | 0.090517501  | 0.083498906 | 0.280244001 |
| pcaec444.c102                  | -0.023824347 | 0.021977451 | 0.280252928 |
| pcaac365.pcaec424              | 0.005787973  | 0.005339296 | 0.280254264 |
| pcaac421.c181                  | -0.014113059 | 0.013020643 | 0.280313516 |
| pcaec361.pcaec343              | 0.115619645  | 0.106678166 | 0.280349512 |
| c8.pcaac365                    | 0.036551003  | 0.033724474 | 0.28035169  |

|                        |              |             |             |
|------------------------|--------------|-------------|-------------|
| serotonin.pcaec383     | -0.093386726 | 0.086179044 | 0.280429586 |
| pcaac240.pcaac363      | -0.017611143 | 0.016251923 | 0.280430351 |
| lysopcac280.taurine    | 0.1094262    | 0.100984784 | 0.280449545 |
| c3.pcaec383            | 0.079402358  | 0.073282571 | 0.280485582 |
| pcaec321.arginine      | -0.059243696 | 0.054696033 | 0.280647016 |
| pcaac383.pcaec405      | 0.075407475  | 0.069621039 | 0.280660718 |
| pcaac321.kynurenine    | -0.019163053 | 0.017694287 | 0.28070734  |
| smc261.c141oh          | -0.138349083 | 0.12775624  | 0.280748657 |
| pcaec364.pcaec404      | -0.019152202 | 0.017686492 | 0.280767576 |
| phenylalanine.pcaac321 | 0.029662011  | 0.027396132 | 0.280839999 |
| c16.smohc141           | -0.047475018 | 0.043848537 | 0.280841449 |
| glutamicacid.smc240    | -0.058025678 | 0.053593549 | 0.280844015 |
| asparagine.pcaac422    | -0.006304843 | 0.005823387 | 0.280854064 |
| smc160.smohc241        | 0.11628162   | 0.107404631 | 0.280865675 |
| c101.pcaec404          | -0.026311135 | 0.024302963 | 0.280874178 |
| alanine.smohc221       | 0.059729662  | 0.055182764 | 0.280977576 |
| pcaac422.pcaac341      | 0.006560659  | 0.006062195 | 0.281053732 |
| pcaec421.pcaec380      | 0.139635964  | 0.129028861 | 0.281061614 |
| pcaac405.pcaac406      | -0.063823436 | 0.058978463 | 0.281087742 |
| pcaac321.pcaec360      | -0.007723769 | 0.007139053 | 0.281195927 |
| pcaec301.glycine       | 0.037712868  | 0.034861792 | 0.281249764 |
| pcaec405.tyrosine      | -0.089837317 | 0.083052447 | 0.281288939 |
| asparticacid.pcaec422  | -0.057025114 | 0.052723351 | 0.281334373 |
| pcaac240.smc161        | -0.117282043 | 0.1084395   | 0.281355486 |
| pcaec362.pcaac365      | -0.057694942 | 0.053345612 | 0.281360969 |
| lysopcac204.pcaac361   | -0.049177493 | 0.04547139  | 0.281372984 |
| histidine.valine       | 0.081338954  | 0.075209644 | 0.281376408 |
| ornithine.lysopcac161  | -0.111049602 | 0.102686972 | 0.281402211 |
| smohc222.alanine       | -0.02696807  | 0.024938409 | 0.281424861 |
| smc260.lysopcac203     | -0.032660164 | 0.030203331 | 0.28144428  |
| pcaec401.pcaac341      | 0.007310358  | 0.006760679 | 0.281461057 |
| pcaec365.pcaac385      | -0.021986816 | 0.020335262 | 0.281500477 |
| spermidine.creatinine  | -0.055377614 | 0.051221789 | 0.281536982 |
| methionine.c16         | -0.031676141 | 0.02929901  | 0.28153718  |
| pcaec382.pcaac383      | 0.021302581  | 0.019708956 | 0.281659318 |
| pcaec402.c141oh        | -0.101321637 | 0.093745845 | 0.28167966  |
| methionine.c18         | 0.060502169  | 0.055979342 | 0.281687402 |
| pcaac362.pcaec445      | 0.105124847  | 0.097267347 | 0.281692749 |
| pcaac380.pcaac365      | 0.071162177  | 0.065861955 | 0.281829227 |
| pcaac380.smc160        | -0.069850308 | 0.06465507  | 0.281883144 |
| pcaac341.smohc161      | -0.019721798 | 0.018261593 | 0.282057367 |
| pcaac320.c182          | -0.03768267  | 0.034892799 | 0.28205956  |
| pcaec382.pcaac365      | -0.069617196 | 0.064464938 | 0.282073788 |

|                           |              |             |             |
|---------------------------|--------------|-------------|-------------|
| c141.pcaec363             | -0.026687811 | 0.024716006 | 0.282138126 |
| smohc161.pcaec421         | 0.001504509  | 0.001393372 | 0.282145858 |
| pcaec446.c2               | -0.040949075 | 0.037928303 | 0.282197683 |
| pcaec364.pcaec360         | -0.004848727 | 0.004491541 | 0.282250994 |
| smc261.pcaec383           | -0.08893121  | 0.082390699 | 0.28231318  |
| glutamicacid.smc180       | -0.018017955 | 0.01669424  | 0.282354184 |
| ornithine.pcaec445        | -0.046022654 | 0.042649964 | 0.28244894  |
| pcaec425.c101             | 0.026750886  | 0.024793092 | 0.282499177 |
| pcaec301.pcaec424         | 0.009475937  | 0.008782857 | 0.282522492 |
| smc160.serine             | -0.022880942 | 0.021207498 | 0.282524566 |
| acetylmethionine.pcaec321 | 0.035979531  | 0.033352962 | 0.282594508 |
| pcaec361.pcaec344         | -0.086641345 | 0.0803172   | 0.282599435 |
| lysopcac140.pcaec383      | 0.105707011  | 0.098006015 | 0.282671796 |
| lysopcac160.c141oh        | -0.136733037 | 0.12679494  | 0.282759558 |
| acetylmethionine.pcaec383 | -0.003168419 | 0.002938268 | 0.282781954 |
| glycine.pcaec385          | 0.03627605   | 0.033643197 | 0.282813435 |
| pcaec365.c51              | 0.028076426  | 0.026043125 | 0.282895108 |
| pcaec281.pcaec364         | -0.061768754 | 0.057296159 | 0.282901069 |
| lysopcac180.smc261        | 0.061337499  | 0.056907267 | 0.282994878 |
| h1.valine                 | 0.082694025  | 0.076742729 | 0.283128925 |
| pcaec364.pcaec424         | 0.00613608   | 0.005694884 | 0.283162876 |
| pcaec426.kynurenine       | -0.013564936 | 0.012591498 | 0.283235519 |
| phenylalanine.pcaec423    | -0.009288633 | 0.008622548 | 0.283262199 |
| pcaec405.c8               | -0.047994719 | 0.044556785 | 0.283302555 |
| pcaec403.pcaec341         | 0.010033069  | 0.009314436 | 0.283305168 |
| phenylalanine.pcaec321    | 0.045177584  | 0.041942549 | 0.283315154 |
| pcaec423.serine           | -0.028376842 | 0.026346755 | 0.283349667 |
| lysopcac140.pcaec424      | 0.004764772  | 0.004423963 | 0.28335656  |
| c141oh.lysine             | 0.069616323  | 0.064637399 | 0.283360393 |
| pcaec381.c12              | 0.09026808   | 0.083822224 | 0.283417995 |
| pcaec384.h1               | 0.0013345    | 0.001239593 | 0.283567888 |
| pcaec420.pcaec323         | 0.128215463  | 0.119098631 | 0.283574083 |
| pcaec385.pcaec445         | 0.074879641  | 0.069555767 | 0.283577419 |
| c3.pcaec402               | -0.073131366 | 0.06794686  | 0.283683754 |
| pcaec322.pcaec365         | -0.05115157  | 0.047529457 | 0.283725902 |
| pcaec444.pcaec402         | -0.047175059 | 0.043837987 | 0.283763737 |
| pcaec402.creatinine       | -0.019222478 | 0.017865836 | 0.283847449 |
| pcaec281.pcaec423         | -0.007436658 | 0.006912599 | 0.283902195 |
| pcaec383.pcaec322         | 0.07278629   | 0.06765765  | 0.283906352 |
| smohc241.pcaec423         | -0.008478339 | 0.007881647 | 0.283949312 |
| pcaec360.pcaec403         | -0.014009642 | 0.013024339 | 0.283974078 |
| c101.c102                 | -0.048203923 | 0.044815448 | 0.283992516 |
| lysopcac181.c2            | 0.063335292  | 0.058885532 | 0.284011804 |

|                              |              |             |             |
|------------------------------|--------------|-------------|-------------|
| pcaec402.pcaac383            | 0.006770517  | 0.006295124 | 0.284033468 |
| pcaac322.pcaec406            | 0.009147873  | 0.00850601  | 0.284059208 |
| smohc161.lysopcac180         | 0.090436057  | 0.084094803 | 0.284083254 |
| pcaac426.tyrosine            | -0.080603262 | 0.074958779 | 0.284130009 |
| pcaac401.transhydroxyproline | 0.06197995   | 0.057640816 | 0.284139958 |
| pcaac380.pcaec380            | -0.072652458 | 0.067578053 | 0.284224394 |
| pcaac240.pcaec364            | -0.008992091 | 0.008364171 | 0.284231973 |
| pcaec365.pcaec343            | -0.130887144 | 0.12174735  | 0.284232302 |
| pcaac361.smc161              | -0.058065441 | 0.054017556 | 0.284292682 |
| pcaac402.pcaec443            | -0.202937132 | 0.188810203 | 0.284344289 |
| pcaac406.c141                | -0.028885696 | 0.026883947 | 0.284505794 |
| glutamine.pcaac240           | -0.022239361 | 0.020700181 | 0.284551789 |
| pcaac321.pcaac360            | 0.050796097  | 0.047280708 | 0.284553759 |
| pcaec380.c14                 | -0.080755336 | 0.075175715 | 0.284611973 |
| pcaac363.pcaec446            | -0.051058885 | 0.047533449 | 0.284635889 |
| smc161.pcaec363              | -0.052027045 | 0.048435441 | 0.284642625 |
| c51dc.smohc161               | -0.018419942 | 0.017149522 | 0.284675373 |
| pcaec424.c181                | -0.013520454 | 0.012589855 | 0.284747944 |
| pcaac386.c8                  | -0.058707744 | 0.054674392 | 0.284813222 |
| c12.pcaac406                 | 0.05752609   | 0.053574553 | 0.284818884 |
| smc240.lysopcac280           | -0.008024243 | 0.007473062 | 0.284819777 |
| pcaec343.histidine           | -0.070115055 | 0.065302798 | 0.284848504 |
| smc161.glutamine             | 0.027542705  | 0.025656139 | 0.284919405 |
| c141.c2                      | 0.070276313  | 0.06546681  | 0.284949785 |
| methionine.smohc161          | -0.035363292 | 0.032947908 | 0.285019292 |
| pcaac343.c8                  | -0.04643011  | 0.043263341 | 0.285069207 |
| pcaec342.pcaec423            | -0.01046043  | 0.009747121 | 0.285076372 |
| c4.c3                        | 0.15886929   | 0.14803879  | 0.285086031 |
| pcaac281.pcaac361            | 0.060120325  | 0.056022885 | 0.285095502 |
| pcaec342.pcaec362            | 0.024489584  | 0.022821501 | 0.285116095 |
| pcaec385.pcaac281            | 0.001801435  | 0.001679269 | 0.285269481 |
| smc161.isoleucine            | 0.024326616  | 0.022677884 | 0.285290677 |
| pcaac404.serine              | -0.041654636 | 0.038843798 | 0.285442563 |
| smc181.c101                  | -0.038344371 | 0.035759433 | 0.285476436 |
| pcaac321.pcaec301            | -0.106622325 | 0.099452808 | 0.285564685 |
| pcaec343.c181                | -0.009737119 | 0.009082442 | 0.285568301 |
| methioninesulfoxide.smc161   | 0.107751049  | 0.100534615 | 0.285703008 |
| lysopcac181.smohc221         | -0.073489119 | 0.068587954 | 0.2858474   |
| c51dc.pcaac341               | -0.009234225 | 0.00861842  | 0.285850047 |
| pcaac363.lysopcac182         | -0.021002266 | 0.019606825 | 0.285975891 |
| pcaac383.pcaec420            | -0.049847053 | 0.046536429 | 0.285989646 |
| lysopcac160.lysopcac180      | -0.092200522 | 0.08607872  | 0.285999427 |
| c102.smc180                  | 0.029501479  | 0.027542701 | 0.285999775 |

|                                |              |             |             |
|--------------------------------|--------------|-------------|-------------|
| smohc222.serine                | -0.023868847 | 0.022289579 | 0.28611876  |
| pcaec361.lysopcac181           | 0.041452496  | 0.03871875  | 0.286229479 |
| pcaec423.smc160                | -0.059712321 | 0.055776973 | 0.286251969 |
| pcaec363.transhydroxyproline   | 0.024952219  | 0.023308305 | 0.286263609 |
| pcaac342.transhydroxyproline   | 0.024264881  | 0.022671431 | 0.286373279 |
| alanine.h1                     | -0.005197026 | 0.004857431 | 0.286540122 |
| lysopcac170.lysopcac180        | 0.147798459  | 0.138146618 | 0.286560655 |
| c182.pcaac385                  | 0.021979148  | 0.020547245 | 0.286640667 |
| pcaac343.c51                   | -0.142703447 | 0.133406644 | 0.286640928 |
| c4.pcaec364                    | 0.034963975  | 0.032686572 | 0.286647089 |
| pcaac426.pcaac420              | -0.102132383 | 0.095486668 | 0.286681022 |
| smc241.pcaec401                | 0.068506104  | 0.064057555 | 0.286749331 |
| pcaec420.pcaec360              | -0.005610091 | 0.0052459   | 0.286759303 |
| asparticacid.h1                | -0.006871439 | 0.006425466 | 0.286766859 |
| smc180.c51                     | 0.042091384  | 0.039362672 | 0.286804879 |
| pcaec384.pcaec404              | -0.0180468   | 0.016878754 | 0.286858843 |
| c4.h1                          | 0.001765097  | 0.001650872 | 0.286864206 |
| lysopcac182.smc241             | -0.061253908 | 0.057291217 | 0.28687438  |
| pcaec421.pcaec423              | -0.191737281 | 0.179334003 | 0.286876402 |
| smc180.pcaec385                | -0.060659145 | 0.056738998 | 0.286908783 |
| pcaec423.phenylalanine         | 0.056964918  | 0.053292945 | 0.28699373  |
| asymmetricdimethylarginine.pca | 0.040729373  | 0.038108286 | 0.287048371 |
| pcaac425.isoleucine            | 0.036107916  | 0.03378576  | 0.287070007 |
| pcaec385.histidine             | -0.059943818 | 0.056103975 | 0.28720039  |
| pcaac364.pcaec421              | 0.001498805  | 0.001403023 | 0.28727815  |
| methioninesulfoxide.pcaec404   | 0.034493308  | 0.032301387 | 0.287462441 |
| pcaec363.pcaac344              | 0.096437189  | 0.090315347 | 0.287496358 |
| c141.c5                        | -0.011010512 | 0.010311689 | 0.287502176 |
| pcaec362.putrescine            | -0.053311282 | 0.049928913 | 0.287514007 |
| smohc221.smc240                | 0.064328781  | 0.060264764 | 0.287652354 |
| pcaac344.pcaec301              | -0.097589782 | 0.091427422 | 0.287667809 |
| pcaac406.asparticacid          | 0.049499302  | 0.046376574 | 0.287698165 |
| pcaac405.pcaec424              | 0.005108658  | 0.004786463 | 0.287707262 |
| pcaec423.asymmetricdimethylar; | 0.021313451  | 0.019970185 | 0.287729912 |
| acetylmithoine.prolinr         | -0.049210584 | 0.046110391 | 0.287743153 |
| acetylmithoine.pcaac426        | 0.02433746   | 0.022804941 | 0.28775799  |
| smc160.pcaec402                | -0.051585398 | 0.048337885 | 0.287765896 |
| pcaac343.phenylalanine         | 0.073045399  | 0.068450095 | 0.287788373 |
| pcaec322.glutamicacid          | 0.077955858  | 0.073058465 | 0.28783325  |
| pcaec401.pcaec382              | 0.019102151  | 0.017902216 | 0.287836266 |
| pcaec361.c182                  | -0.042743586 | 0.040058768 | 0.287838603 |
| smc241.pcaac425                | 0.118603213  | 0.111153822 | 0.287840058 |
| pcaac385.putrescine            | -0.046441715 | 0.043528428 | 0.287880732 |

|                               |              |             |             |
|-------------------------------|--------------|-------------|-------------|
| c0.smc260                     | 0.035515296  | 0.03329457  | 0.287983795 |
| pcaac425.smc202               | 0.05176709   | 0.048532093 | 0.288002911 |
| histidine.glutamine           | 0.048539107  | 0.04551434  | 0.288092679 |
| glutamicacid.pcaac366         | 0.027027317  | 0.025343864 | 0.288107522 |
| smohc161.serine               | -0.03083325  | 0.028912943 | 0.288110958 |
| pcaec381.pcaac341             | 0.013148376  | 0.012329641 | 0.288116831 |
| pcaac424.pcaac383             | 0.007831355  | 0.007343811 | 0.28812374  |
| pcaec340.pcaec423             | -0.00721993  | 0.006771047 | 0.288166041 |
| c102.smohc141                 | -0.031136313 | 0.029202614 | 0.288201097 |
| methionine.leucine            | -0.012024886 | 0.011278618 | 0.288223652 |
| pcaec403.smc261               | -0.095049626 | 0.089159708 | 0.288271512 |
| pcaec343.h1                   | 0.004251981  | 0.0039891   | 0.288343833 |
| pcaac380.putrescine           | -0.038885385 | 0.036485881 | 0.288404418 |
| ornithine.pcaac300            | -0.042101671 | 0.039512281 | 0.288508709 |
| methionine.pcaac385           | 0.034228081  | 0.032125997 | 0.288554368 |
| pcaec361.pcaec364             | -0.007995685 | 0.007505755 | 0.288625819 |
| acetylmithoine.c14            | -0.01070089  | 0.010045417 | 0.28863616  |
| pcaec425.smohc222             | -0.007268884 | 0.006824739 | 0.288713838 |
| asparticacid.smc181           | -0.007760814 | 0.007287324 | 0.288760832 |
| smc180.pcaac405               | -0.069961845 | 0.065701494 | 0.288819654 |
| glutamicacid.pcaac281         | -0.002283267 | 0.002144269 | 0.288829259 |
| putrescine.c162               | -0.093062421 | 0.087413514 | 0.28891944  |
| alphaaminoadipicacid.pcaac403 | -0.011516597 | 0.01081789  | 0.288935073 |
| pcaec403.lysopcac204          | 0.102557824  | 0.096343649 | 0.288974796 |
| pcaec425.serine               | -0.026656053 | 0.025041423 | 0.288984601 |
| smohc222.smc160               | 0.243377896  | 0.228638504 | 0.288990214 |
| lysopcac280.pcaac420          | -0.105740361 | 0.099353409 | 0.289071765 |
| pcaec363.c142                 | 0.057697317  | 0.054224974 | 0.289184284 |
| pcaec422.pcaac406             | -0.049603271 | 0.046619428 | 0.289198534 |
| pcaac323.pcaec322             | 0.093458072  | 0.087850705 | 0.289277946 |
| c18.pcaec423                  | -0.006756904 | 0.006355097 | 0.289550055 |
| pcaec361.arginine             | -0.088114463 | 0.082876975 | 0.289563559 |
| pcaac385.smohc141             | -0.017318374 | 0.016289417 | 0.28957653  |
| lysopcac140.pcaac420          | -0.084124951 | 0.079143059 | 0.289675612 |
| pcaac386.pcaec446             | -0.072028622 | 0.067780006 | 0.289795601 |
| smc181.c2                     | -0.069630078 | 0.065523694 | 0.289801131 |
| pcaac406.c182                 | -0.034678759 | 0.032639028 | 0.289880959 |
| pcaac426.smc161               | -0.079623816 | 0.074947203 | 0.289923844 |
| pcaac240.c12                  | 0.104564894  | 0.098440226 | 0.290005981 |
| alanine.c51                   | -0.055895618 | 0.052628412 | 0.290067705 |
| c14.serine                    | 0.021829563  | 0.020556722 | 0.290141053 |
| asparticacid.pcaac381         | 0.030398531  | 0.028634476 | 0.290282461 |
| pcaec424.pcaac381             | 0.024841071  | 0.023399921 | 0.290290651 |

|                       |              |             |             |
|-----------------------|--------------|-------------|-------------|
| lysopcac281.smc180    | -0.007986956 | 0.007524116 | 0.290324001 |
| serine.h1             | 0.002964379  | 0.002792774 | 0.290354729 |
| pcaec361.taurine      | 0.089866409  | 0.084681721 | 0.290454624 |
| pcaac401.pcaec362     | 0.010492792  | 0.009888382 | 0.29050096  |
| pcaec424.c142         | 0.052469421  | 0.049447414 | 0.290504431 |
| pcaac343.pcaac240     | -0.023049156 | 0.021724927 | 0.290577435 |
| c141.c162             | -0.121732745 | 0.114742211 | 0.290591254 |
| c16.pcaac403          | 0.008044289  | 0.007582452 | 0.290598095 |
| histidine.pcaac422    | -0.0224201   | 0.021138743 | 0.290730449 |
| pcaac321.pcaec403     | -0.0758243   | 0.071495946 | 0.290765174 |
| c18.pcaac383          | 0.005151349  | 0.004857392 | 0.290775381 |
| spermidine.c102       | 0.148300157  | 0.139878027 | 0.290914394 |
| smc160.pcaac421       | -0.035259332 | 0.033261901 | 0.290986408 |
| pcaec383.pcaec423     | 0.034420393  | 0.032471108 | 0.2909956   |
| c141.lysopcac160      | 0.038721789  | 0.036531456 | 0.291029097 |
| glutamicacid.c162     | -0.111461631 | 0.105158485 | 0.29103724  |
| h1.smohc222           | -0.018899297 | 0.017830971 | 0.291048775 |
| smc161.kynurenine     | -0.0054574   | 0.005149179 | 0.291074082 |
| smohc141.serine       | -0.017439453 | 0.016454716 | 0.291079944 |
| pcaac323.pcaac403     | -0.006032885 | 0.005692506 | 0.291103041 |
| asparagine.pcaac323   | 0.10646161   | 0.100471183 | 0.291180589 |
| pcaac404.pcaac363     | -0.012732163 | 0.012017482 | 0.291250042 |
| pcaec424.creatinine   | -0.011487417 | 0.010842758 | 0.291256817 |
| pcaec443.pcaac366     | 0.084323372  | 0.079633694 | 0.291512985 |
| prolinr.pcaac361      | 0.042425527  | 0.040079636 | 0.291676341 |
| c141.lysopcac280      | 0.01352099   | 0.012774371 | 0.29171452  |
| lysopcac281.pcaec322  | -0.093318778 | 0.088185638 | 0.291822737 |
| pcaec406.pcaac341     | 0.007696779  | 0.007273998 | 0.291861878 |
| c18.pcaec420          | -0.051220463 | 0.048407195 | 0.291864343 |
| isoleucine.c51        | 0.037015588  | 0.034984658 | 0.29189375  |
| pcaac402.pcaac340     | -0.058137144 | 0.054949666 | 0.291914083 |
| smohc241.pcaac380     | 0.041723769  | 0.039442322 | 0.291988867 |
| pcaec401.histidine    | -0.099043378 | 0.093632779 | 0.292014904 |
| pcaec363.pcaac240     | -0.015867176 | 0.015001987 | 0.292066567 |
| pcaac364.pcaec301     | 0.104158178  | 0.098492004 | 0.292131245 |
| arginine.asparticacid | -0.032086357 | 0.030344167 | 0.292183483 |
| prolinr.pcaec383      | -0.043803304 | 0.041425246 | 0.292187276 |
| pcaec300.lysopcac160  | -0.02227805  | 0.021069705 | 0.292212783 |
| smc161.pcaac240       | -0.011763149 | 0.011125788 | 0.292241454 |
| pcaac322.smc240       | -0.055594612 | 0.052583789 | 0.292254732 |
| pcaec381.lysopcac203  | 0.013475341  | 0.012746742 | 0.29229927  |
| smc260.pcaec360       | 0.010899547  | 0.010310824 | 0.29232752  |
| pcaec422.pcaec364     | -0.009702354 | 0.0091798   | 0.292406262 |

|                              |              |             |             |
|------------------------------|--------------|-------------|-------------|
| pcaac425.smohc141            | -0.0203448   | 0.019250708 | 0.292447409 |
| smc180.pcaac402              | -0.081878501 | 0.077475691 | 0.292449959 |
| smc241.pcaac404              | 0.018798945  | 0.017792185 | 0.292560886 |
| leucine.smc181               | -0.016335919 | 0.015462659 | 0.292610502 |
| pcaec384.pcaac380            | 0.081768738  | 0.077408197 | 0.292675837 |
| phenylalanine.glutamine      | 0.024761694  | 0.023441357 | 0.29267888  |
| smohc222.pcaec340            | -0.082820668 | 0.078405797 | 0.292686676 |
| pcaac384.pcaec404            | -0.019856986 | 0.018798502 | 0.292687203 |
| pcaec401.methionine          | -0.054158174 | 0.051272638 | 0.292700185 |
| serotonin.c51dc              | -0.127979503 | 0.121218502 | 0.292929133 |
| pcaec340.pcaac380            | 0.062790339  | 0.059482747 | 0.29300628  |
| smc240.asparagine            | -0.009238521 | 0.00875284  | 0.293059811 |
| smohc141.smohc221            | 0.041968372  | 0.039764712 | 0.293092098 |
| pcaec443.pcaac341            | 0.007195104  | 0.006820102 | 0.293289198 |
| kynurenine.glutamicacid      | 0.073840082  | 0.0700004   | 0.293349615 |
| pcaec402.pcaac381            | 0.03668424   | 0.034778489 | 0.293374889 |
| phenylalanine.pcaec422       | -0.047281447 | 0.044826422 | 0.29338832  |
| pcaac386.smohc141            | -0.022703321 | 0.021530162 | 0.293515192 |
| pcaac323.pcaac361            | -0.047564597 | 0.045121212 | 0.293669103 |
| pcaec362.lysopcac204         | -0.033400733 | 0.031687589 | 0.293709247 |
| kynurenine.smc161            | 0.06908589   | 0.065550479 | 0.293768269 |
| pcaec423.pcaec424            | 0.02771997   | 0.026304339 | 0.293821558 |
| pcaac421.transhydroxyproline | 0.045503071  | 0.043180221 | 0.293832077 |
| phenylalanine.c102           | 0.029348036  | 0.027852341 | 0.29387471  |
| serine.kynurenine            | -0.007135723 | 0.006772209 | 0.29388543  |
| pcaec446.putrescine          | -0.0553565   | 0.052539437 | 0.293912501 |
| pcaec445.pcaac381            | 0.021451746  | 0.020360886 | 0.293931585 |
| smc260.c51dc                 | 0.124282106  | 0.117970748 | 0.293966684 |
| pcaec404.lysopcac180         | -0.076589377 | 0.072705632 | 0.294004091 |
| putrescine.pcaac402          | 0.022576611  | 0.021433212 | 0.294036191 |
| glutamicacid.smohc161        | -0.020510829 | 0.019473164 | 0.294063649 |
| glycine.pcaec445             | -0.061348281 | 0.058249817 | 0.294106677 |
| pcaec365.pcaec404            | -0.012742566 | 0.012099722 | 0.294135855 |
| pcaec423.pcaac402            | 0.101514837  | 0.096399331 | 0.294164618 |
| c51.pcaec424                 | -0.009642014 | 0.009160667 | 0.294402496 |
| pcaec342.smc160              | 0.149700443  | 0.142233203 | 0.294423053 |
| smc241.c101                  | -0.014349317 | 0.013634098 | 0.294442213 |
| citruline.pcaec362           | 0.020141811  | 0.019139844 | 0.294491671 |
| lysopcac280.pcaec364         | -0.008824098 | 0.008385412 | 0.29450744  |
| smohc222.glutamicacid        | 0.040868028  | 0.038836599 | 0.294511204 |
| pcaec444.serine              | -0.009894929 | 0.009403638 | 0.294539671 |
| asparagine.lysopcac280       | 0.010933395  | 0.010391578 | 0.294587565 |
| c182.c12                     | 0.062038536  | 0.058969997 | 0.294635281 |



|                              |              |             |             |
|------------------------------|--------------|-------------|-------------|
| pcaac426.pcaec424            | 0.006916978  | 0.006575516 | 0.294683882 |
| pcaac383.c51                 | 0.043517826  | 0.041385903 | 0.29487412  |
| serine.smc181                | -0.015128878 | 0.014389173 | 0.294922708 |
| c8.pcaec406                  | -0.00566743  | 0.005391933 | 0.295065809 |
| acetylmethionine.pcaac300    | -0.0984201   | 0.093637361 | 0.29507358  |
| pcaec384.pcaac403            | -0.004055259 | 0.003858631 | 0.295128241 |
| pcaec444.c51                 | 0.069165118  | 0.065812305 | 0.295134072 |
| c181.pcaec322                | 0.073490042  | 0.069961821 | 0.295369548 |
| pcaec425.pcaec380            | 0.091078296  | 0.086725396 | 0.295478954 |
| pcaec423.creatinine          | -0.015303915 | 0.014574417 | 0.295542361 |
| smohc161.smc260              | 0.050556855  | 0.048148004 | 0.295552988 |
| glycine.pcaec420             | 0.049119929  | 0.04678103  | 0.295568287 |
| smohc222.pcaac240            | -0.010116305 | 0.009637851 | 0.295730255 |
| c0.pcaac384                  | -0.08416783  | 0.080195543 | 0.295781002 |
| pcaac321.lysine              | -0.084267267 | 0.08029386  | 0.295802403 |
| pcaac363.pcaec360            | -0.00481245  | 0.004586081 | 0.295860107 |
| smc202.pcaec380              | 0.065171515  | 0.062115533 | 0.295934182 |
| pcaec322.leucine             | -0.013285723 | 0.01266284  | 0.295938074 |
| c5.pcaec340                  | -0.104065373 | 0.099187827 | 0.295944962 |
| smohc221.pcaac341            | 0.010853129  | 0.010347769 | 0.296099624 |
| pcaec361.pcaac380            | 0.074594551  | 0.071124182 | 0.296120029 |
| pcaac240.serine              | -0.030789071 | 0.029358655 | 0.296152583 |
| methionine.pcaec406          | 0.008520193  | 0.008125035 | 0.296192745 |
| smohc222.lysopcac181         | 0.051284301  | 0.048907102 | 0.296205654 |
| c141oh.arginine              | 0.040232067  | 0.038371675 | 0.296262075 |
| c12.c14                      | 0.066062358  | 0.06302395  | 0.29638739  |
| pcaac406.pcaec321            | -0.032392211 | 0.030903368 | 0.296402542 |
| pcaac425.c2                  | 0.097425475  | 0.092955622 | 0.296444532 |
| pcaec444.pcaec406            | 0.002797181  | 0.002668873 | 0.29644908  |
| pcaac422.smohc241            | 0.09811678   | 0.093616276 | 0.296450007 |
| pcaac421.c16                 | 0.028235244  | 0.026944824 | 0.296533893 |
| methioninesulfoxide.pcaac403 | 0.019912281  | 0.019006315 | 0.296637043 |
| pcaec322.alanine             | -0.013755933 | 0.013132317 | 0.296719431 |
| pcaec381.pcaec340            | -0.056113229 | 0.053570409 | 0.296728758 |
| lysopcac281.pcaac420         | -0.127995634 | 0.122237955 | 0.296896283 |
| smohc141.pcaac323            | -0.128669382 | 0.12288976  | 0.296929036 |
| c16.pcaec301                 | -0.057902811 | 0.055306125 | 0.296965709 |
| c8.c16                       | 0.059585266  | 0.056913481 | 0.29696868  |
| pcaec403.pcaec443            | 0.233032558  | 0.222599485 | 0.29700334  |
| pcaec384.serine              | -0.04479707  | 0.042792078 | 0.297010229 |
| pcaac420.pcaac341            | 0.005332021  | 0.005093438 | 0.297016275 |
| c12.c10                      | 0.050924494  | 0.048649643 | 0.297053621 |
| pcaec444.ornithine           | -0.039738117 | 0.037963097 | 0.297055194 |

|                                |              |             |             |
|--------------------------------|--------------|-------------|-------------|
| c51dc.pcaec401                 | -0.093583613 | 0.08940585  | 0.297068235 |
| pcaac281.prolinr               | 0.03198929   | 0.030563259 | 0.297100285 |
| pcaac360.pcaac383              | 0.007469326  | 0.007136948 | 0.297140246 |
| pcaac424.pcaec365              | 0.031907049  | 0.030499903 | 0.297340442 |
| smohc161.pcaac406              | -0.050329823 | 0.048114303 | 0.297381404 |
| pcaac384.pcaac403              | -0.004179645 | 0.003996045 | 0.297428137 |
| pcaac342.pcaac365              | -0.055798714 | 0.05334768  | 0.297428551 |
| pcaac421.pcaec424              | 0.060137456  | 0.057515591 | 0.297593855 |
| smc241.pcaec406                | 0.00889175   | 0.008504214 | 0.297600935 |
| c4.pcaac240                    | -0.025918986 | 0.024795119 | 0.297713155 |
| smc161.alanine                 | -0.024161604 | 0.023115193 | 0.297739264 |
| c102.h1                        | -0.00687063  | 0.006573394 | 0.297762929 |
| smohc222.c102                  | 0.028955342  | 0.027716065 | 0.297995347 |
| c10.pcaec402                   | -0.093695027 | 0.089692989 | 0.298038655 |
| citruiline.pcaac364            | 0.045282078  | 0.043364961 | 0.298227753 |
| pcaec386.smohc221              | 0.026796805  | 0.025666105 | 0.298299053 |
| pcaac281.pcaec424              | 0.007455039  | 0.007140486 | 0.298300063 |
| asparagine.pcaac344            | 0.037590343  | 0.036005757 | 0.298319789 |
| serine.pcaac321                | 0.027335618  | 0.026183856 | 0.298329813 |
| smc160.pcaec423                | -0.020587356 | 0.01972074  | 0.2983497   |
| smc240.smohc222                | 0.00888988   | 0.008515695 | 0.298351433 |
| prolinr.pcaec300               | -0.071526238 | 0.068522787 | 0.298401769 |
| pcaec342.smohc141              | 0.008057834  | 0.007720491 | 0.298464877 |
| glutamine.c14                  | 0.060830584  | 0.058284761 | 0.298472024 |
| pcaec362.pcaac383              | 0.013090753  | 0.012544922 | 0.298549942 |
| pcaac366.lysopcac170           | 0.010688239  | 0.010242833 | 0.298561663 |
| smc202.pcaec424                | -0.055522649 | 0.053212288 | 0.298592503 |
| c181.c2                        | -0.061096322 | 0.058554341 | 0.298595035 |
| pcaac365.pcaac322              | -0.08379137  | 0.080312078 | 0.298636634 |
| asymmetricdimethylarginine.pca | -0.002992578 | 0.002868523 | 0.298671241 |
| lysopcac281.pcaac384           | 0.040424778  | 0.038751687 | 0.298704671 |
| pcaac240.pcaec424              | 0.006601954  | 0.006329078 | 0.298732388 |
| pcaec424.serine                | -0.019638123 | 0.018827493 | 0.298759603 |
| smc202.lysopcac181             | 0.075308674  | 0.072202466 | 0.298775669 |
| c18.pcaac422                   | 0.044498451  | 0.04266699  | 0.298820095 |
| c141.pcaac403                  | 0.005159136  | 0.004947414 | 0.298880072 |
| pcaec444.smc240                | -0.032496038 | 0.031162918 | 0.298887256 |
| lysopcac180.lysopcac161        | -0.071276148 | 0.0683598   | 0.298941394 |
| pcaac426.asparticacid          | 0.037836353  | 0.036291706 | 0.298987455 |
| alphaaminoadipicacid.pcaec364  | -0.027520845 | 0.026398966 | 0.299017404 |
| c101.pcaec406                  | -0.003565179 | 0.003419907 | 0.299026012 |
| pcaec444.pcaec382              | -0.012960491 | 0.012434802 | 0.29911966  |
| c142.pcaec380                  | -0.063589642 | 0.061012076 | 0.299132983 |

|                        |              |             |             |
|------------------------|--------------|-------------|-------------|
| asparticacid.pcaec362  | -0.018814592 | 0.018055686 | 0.299232466 |
| pcaec343.pcaac420      | 0.08865499   | 0.08508862  | 0.299286895 |
| pcaec422.pcaac363      | -0.032493385 | 0.031190044 | 0.299345341 |
| pcaec380.pcaac240      | -0.022233476 | 0.021342562 | 0.299365472 |
| ornithine.tyrosine     | -0.051692967 | 0.049627693 | 0.299424701 |
| pcaac320.c51           | 0.055961627  | 0.053737928 | 0.299533273 |
| pcaac384.c141          | -0.031998033 | 0.030728873 | 0.299569599 |
| c181.pcaec423          | -0.008736761 | 0.008390335 | 0.299575688 |
| smohc221.c51dc         | -0.132966555 | 0.127748606 | 0.299780641 |
| glutamine.smc180       | 0.009521108  | 0.009148238 | 0.299820767 |
| pcaec421.pcaec342      | 0.120015706  | 0.115320815 | 0.299842569 |
| lysopcac281.kynurenine | -0.008607143 | 0.008270725 | 0.299859124 |
| c181.lysopcac203       | -0.019177942 | 0.018428368 | 0.299859482 |
| pcaec423.alanine       | -0.015414616 | 0.014812486 | 0.299870981 |
| smc202.lysopcac280     | 0.009510457  | 0.009139752 | 0.299912848 |
| pcaac240.smc180        | -0.005063926 | 0.00486759  | 0.300016534 |
| pcaec361.smc180        | -0.004499907 | 0.004325622 | 0.300037013 |
| pcaec401.pcaec364      | -0.01161068  | 0.011162773 | 0.300113941 |
| pcaac344.pcaec405      | -0.047306716 | 0.045482109 | 0.300117666 |
| smc160.pcaec425        | 0.026242895  | 0.025231581 | 0.300134199 |
| smc180.pcaec406        | 0.007134175  | 0.006859288 | 0.300137005 |
| pcaec300.pcaec301      | -0.05857011  | 0.05631689  | 0.300167359 |
| pcaac383.pcaac360      | 0.03146985   | 0.03026493  | 0.300258668 |
| pcaec405.ornithine     | -0.059328026 | 0.057057273 | 0.300265449 |
| pcaec445.c3            | -0.020913589 | 0.020114513 | 0.300298528 |
| pcaac322.c10           | -0.009233226 | 0.008881318 | 0.300346249 |
| pcaec401.c5            | 0.025148505  | 0.024195239 | 0.300450179 |
| lysine.pcaec402        | 0.037277786  | 0.035866785 | 0.300477434 |
| h1.c141                | -0.020065009 | 0.019308346 | 0.300547692 |
| pcaec443.pcaec364      | -0.009126144 | 0.008782145 | 0.300556112 |
| pcaec360.pcaac402      | -0.069999313 | 0.067360975 | 0.300557532 |
| pcaac365.smc161        | -0.061730079 | 0.059420106 | 0.300692785 |
| alanine.pcaec383       | -0.046092476 | 0.044367988 | 0.300696235 |
| pcaec445.pcaac403      | -0.006017562 | 0.005792462 | 0.300699463 |
| pcaac363.pcaac425      | -0.120545093 | 0.116040736 | 0.300719779 |
| lysopcac281.pcaac344   | -0.063944598 | 0.061559927 | 0.300756696 |
| kynurenine.pcaac385    | 0.032347193  | 0.031145362 | 0.300826045 |
| pcaec321.putrescine    | -0.04145338  | 0.039920216 | 0.300910453 |
| pcaac320.spermidine    | -0.071920007 | 0.06926645  | 0.300955112 |
| pcaec386.pcaac365      | 0.065499994  | 0.063086779 | 0.300981595 |
| pcaac342.smc160        | 0.086461596  | 0.083278746 | 0.300996926 |
| pcaec300.pcaec406      | 0.003745133  | 0.003608998 | 0.301228122 |
| pcaec360.histidine     | -0.05995682  | 0.057780745 | 0.301255944 |

|                              |              |             |             |
|------------------------------|--------------|-------------|-------------|
| asparticacid.smc180          | -0.005261299 | 0.005071797 | 0.301393752 |
| pcaec362.alanine             | -0.015366377 | 0.014815897 | 0.301490911 |
| citruline.pcaac300           | -0.069275075 | 0.066796991 | 0.301516878 |
| arginine.pcaec364            | -0.009999296 | 0.009642116 | 0.301542376 |
| serine.serotonin             | -0.084418756 | 0.081404634 | 0.301550461 |
| smc161.c51                   | 0.053794644  | 0.051876487 | 0.301574117 |
| pcaac381.pcaac383            | 0.0064473    | 0.006217627 | 0.301591038 |
| pcaac406.pcaac365            | 0.068978439  | 0.066527409 | 0.301635905 |
| pcaec443.pcaac385            | -0.019978759 | 0.019269453 | 0.301651022 |
| pcaac406.pcaec401            | -0.060440233 | 0.05829776  | 0.301678593 |
| smohc221.pcaec403            | -0.028474235 | 0.027467564 | 0.301725536 |
| asparticacid.smc202          | 0.072380433  | 0.069833235 | 0.301806377 |
| pcaac401.pcaec405            | 0.139933205  | 0.135017401 | 0.301837398 |
| pcaac366.c18                 | 0.058069649  | 0.056034028 | 0.301874737 |
| c3.pcaec382                  | 0.016637574  | 0.016055323 | 0.301904022 |
| smohc222.pcaec406            | 0.006721787  | 0.006486625 | 0.301909537 |
| pcaac422.pcaec364            | -0.00948829  | 0.009157168 | 0.301952991 |
| pcaec340.pcaac383            | 0.005372696  | 0.005185205 | 0.301953433 |
| ornithine.c141               | -0.026898041 | 0.025960478 | 0.301973866 |
| phenylalanine.pcaac425       | 0.080296384  | 0.077508329 | 0.302040785 |
| pcaec343.transhydroxyproline | 0.038643723  | 0.037312752 | 0.302180437 |
| pcaec341.pcaec401            | 0.069515613  | 0.067132186 | 0.302258175 |
| pcaac380.pcaec363            | -0.04345808  | 0.041970631 | 0.302287585 |
| lysopcac204.smc181           | -0.023529497 | 0.022725731 | 0.302321143 |
| pcaec321.pcaec406            | 0.004332902  | 0.004185686 | 0.302412713 |
| pcaec425.pcaec301            | 0.069810897  | 0.067472735 | 0.302653691 |
| pcaac323.lysopcac204         | -0.040465974 | 0.039123288 | 0.302809219 |
| pcaac365.histidine           | -0.082041114 | 0.079339815 | 0.302935963 |
| pcaec381.pcaac385            | -0.028200846 | 0.027273162 | 0.302951186 |
| creatinine.pcaac366          | -0.051913212 | 0.050205694 | 0.30295309  |
| pcaec446.pcaac426            | -0.089300525 | 0.086371207 | 0.302997339 |
| lysopcac160.c12              | 0.088021607  | 0.08513572  | 0.303005706 |
| pcaec342.pcaac403            | -0.005061276 | 0.004895442 | 0.303016131 |
| pcaec445.pcaec403            | 0.045598259  | 0.04410581  | 0.303033456 |
| smc160.c182                  | 0.03114447   | 0.030128806 | 0.303092715 |
| pcaec420.smc202              | -0.044903045 | 0.043439846 | 0.303105483 |
| citruline.lysopcac182        | 0.025990773  | 0.02514452  | 0.303118404 |
| c51dc.c5                     | 0.019098165  | 0.018480341 | 0.303222865 |
| smc161.smc241                | -0.191873608 | 0.185695402 | 0.303297812 |
| arginine.smc202              | -0.0993353   | 0.096149429 | 0.303361244 |
| pcaac380.pcaec446            | -0.134811456 | 0.130500583 | 0.303408436 |
| c101.pcaac426                | -0.05225267  | 0.050582015 | 0.303410631 |
| smc181.c51                   | 0.041691853  | 0.040361805 | 0.303445844 |

|                           |              |             |             |
|---------------------------|--------------|-------------|-------------|
| lysopcac182.c141          | 0.026210439  | 0.025375404 | 0.303467237 |
| pcaec445.kynurenine       | 0.020266247  | 0.01962146  | 0.303488648 |
| pcaec401.pcaec406         | -0.057314915 | 0.055496506 | 0.303533021 |
| pcaac366.smohc141         | -0.026839845 | 0.025990666 | 0.303576733 |
| smohc221.c18              | 0.039532297  | 0.038284112 | 0.303609041 |
| smc241.pcaac360           | -0.050082987 | 0.048502326 | 0.303615492 |
| asparagine.serine         | -0.005478022 | 0.005305485 | 0.303647592 |
| pcaec365.pcaec363         | -0.039701564 | 0.038453163 | 0.303673287 |
| lysopcac203.smc180        | -0.008586282 | 0.008317081 | 0.303719096 |
| pcaac420.c101             | 0.033080715  | 0.03204562  | 0.303750188 |
| lysopcac182.phenylalanine | 0.073629351  | 0.071347006 | 0.303895475 |
| smohc222.pcaac383         | 0.005569783  | 0.005397776 | 0.303952946 |
| pcaac421.pcaec406         | -0.024778014 | 0.024014753 | 0.303991798 |
| pcaac366.pcaec421         | -0.005428746 | 0.005261851 | 0.304022174 |
| lysopcac280.lysopcac180   | 0.060232249  | 0.058382735 | 0.304040309 |
| asparticacid.histidine    | 0.0725617    | 0.070352825 | 0.304172005 |
| prolinr.c18               | -0.071879457 | 0.069693823 | 0.304189091 |
| smc160.glutamicacid       | 0.039101183  | 0.037914017 | 0.304211723 |
| pcaac422.pcaac402         | 0.101820724  | 0.098765021 | 0.304385957 |
| c10.c162                  | -0.114762682 | 0.111326043 | 0.304418237 |
| pcaec425.c2               | -0.058385684 | 0.056643007 | 0.30446687  |
| pcaec446.histidine        | -0.05148448  | 0.049948182 | 0.30447067  |
| pcaec404.methionine       | -0.056262379 | 0.054606588 | 0.304674329 |
| pcaac341.prolinr          | -0.065568946 | 0.063648413 | 0.304743568 |
| pcaec380.phenylalanine    | 0.057498317  | 0.055814532 | 0.304746653 |
| pcaac402.pcaac385         | -0.029425008 | 0.02856446  | 0.304765802 |
| pcaac364.putrescine       | -0.045667743 | 0.044339539 | 0.304845898 |
| arginine.lysopcac182      | 0.035364264  | 0.034338181 | 0.304880333 |
| lysopcac180.serotonin     | -0.092405145 | 0.089735656 | 0.304942701 |
| leucine.putrescine        | -0.035036596 | 0.034025162 | 0.304953142 |
| pcaac360.h1               | 0.00252215   | 0.002449716 | 0.30502691  |
| histidine.asparticacid    | 0.043408192  | 0.042165956 | 0.305077332 |
| acetylmithoine.c101       | -0.014941512 | 0.014514139 | 0.305084491 |
| pcaec401.alanine          | -0.015363696 | 0.014924811 | 0.305102713 |
| pcaac365.pcaec444         | 0.133050632  | 0.129255215 | 0.305122679 |
| pcaec365.pcaec341         | 0.00760513   | 0.007388271 | 0.305128285 |
| histidine.pcaec404        | 0.030101447  | 0.029244682 | 0.305154178 |
| lysopcac170.pcaec364      | -0.020495516 | 0.019914036 | 0.305199544 |
| pcaac323.c101             | -0.021776265 | 0.021158602 | 0.305203032 |
| pcaac320.glutamicacid     | 0.048964496  | 0.047577129 | 0.305217869 |
| pcaac422.pcaec424         | 0.015868996  | 0.015421037 | 0.305270222 |
| pcaac381.pcaec443         | 0.125993118  | 0.122448281 | 0.305316519 |
| pcaec385.pcaec403         | -0.003176833 | 0.003087544 | 0.305330906 |

|                                     |              |             |             |
|-------------------------------------|--------------|-------------|-------------|
| alanine.pcaac360                    | -0.043340136 | 0.042134151 | 0.305469728 |
| pcaec340.c182                       | -0.030551377 | 0.029701588 | 0.305475173 |
| c141.acetylmethionine               | -0.049810046 | 0.048425009 | 0.30547949  |
| asparticacid.pcaac321               | 0.023510699  | 0.022862062 | 0.305587202 |
| pcaac401.c5                         | 0.02986021   | 0.029042125 | 0.305682245 |
| pcaec424.pcaac402                   | -0.0728528   | 0.070857928 | 0.305689638 |
| pcaac343.pcaac364                   | -0.0892073   | 0.086767965 | 0.305708294 |
| pcaec425.smc240                     | -0.034962635 | 0.034007726 | 0.305724288 |
| c16.asymmetricdimethylarginine      | 0.037040126  | 0.036034638 | 0.305806698 |
| lysopcac181.serine                  | -0.042074306 | 0.040932181 | 0.305806922 |
| pcaac300.pcaec406                   | 0.01469128   | 0.014295726 | 0.305916396 |
| c14.c3                              | 0.033498772  | 0.032602041 | 0.305993287 |
| pcaec422.pcaac421                   | -0.070634495 | 0.068770468 | 0.306181047 |
| pcaac343.pcaec340                   | 0.057218835  | 0.055709724 | 0.306188652 |
| pcaac362.pcaec406                   | 0.004205297  | 0.004094609 | 0.30621499  |
| c2.h1                               | 0.010390315  | 0.010116904 | 0.306218535 |
| c2.pcaac321                         | -0.028220044 | 0.027480308 | 0.306268444 |
| pcaec445.smc160                     | -0.110324823 | 0.107437161 | 0.306287718 |
| c51.glutamine                       | -0.018494183 | 0.018010355 | 0.306294187 |
| asparticacid.pcaac361               | 0.069022248  | 0.067219102 | 0.306312483 |
| pcaac300.smohe221                   | -0.041628758 | 0.040541648 | 0.306317297 |
| c18.c102                            | -0.031498386 | 0.030677281 | 0.306340166 |
| pcaec423.pcaec406                   | 0.007861958  | 0.007657162 | 0.306349715 |
| pcaac406.smc180                     | 0.01927835   | 0.018779304 | 0.306430118 |
| alanine.serine                      | -0.013467597 | 0.013119865 | 0.30646297  |
| pcaec404.pcaac363                   | -0.021258366 | 0.020712548 | 0.306534412 |
| pcaec423.pcaac421                   | -0.076317616 | 0.074359862 | 0.306545669 |
| pcaec343.pcaac403                   | -0.004479654 | 0.004365045 | 0.306579567 |
| pcaac420.asymmetricdimethylarginine | 0.024303966  | 0.023682987 | 0.306596205 |
| lysopcac182.valine                  | -0.0983478   | 0.095847047 | 0.306656958 |
| pcaec404.pcaac341                   | 0.00663246   | 0.006463829 | 0.3066582   |
| pcaec361.pcaac383                   | 0.005792806  | 0.005646064 | 0.306704377 |
| citruline.pcaac366                  | -0.087348296 | 0.085137859 | 0.306717098 |
| lysopcac281.pcaec364                | -0.013113845 | 0.012782934 | 0.306752823 |
| lysopcac160.pcaec380                | -0.058663833 | 0.057188118 | 0.306791522 |
| pcaec321.smc261                     | 0.06814432   | 0.066455642 | 0.306976629 |
| c8.pcaac380                         | -0.059307092 | 0.05785171  | 0.307095765 |
| pcaec405.pcaec423                   | 0.054638475  | 0.053301667 | 0.307131996 |
| kynurenine.pcaec385                 | 0.050205896  | 0.048981512 | 0.307171098 |
| lysopcac281.c2                      | -0.092469207 | 0.090221923 | 0.307212689 |
| pcaac344.pcaac364                   | -0.103259555 | 0.100754593 | 0.307234504 |
| alanine.pcaac361                    | 0.031652856  | 0.030886247 | 0.307254066 |
| smc181.asymmetricdimethylarginine   | -0.0172492   | 0.016838616 | 0.307459584 |

|                        |              |             |             |
|------------------------|--------------|-------------|-------------|
| smc241.pcaac281        | 0.001550563  | 0.00151384  | 0.307518573 |
| c18.pcaec322           | 0.074145889  | 0.072394994 | 0.307552797 |
| pcaac380.pcaec383      | 0.096635835  | 0.094364277 | 0.307606002 |
| pcaec385.pcaec343      | -0.113143524 | 0.110484721 | 0.307609459 |
| pcaac281.pcaac383      | 0.007292889  | 0.007121533 | 0.307610996 |
| pcaac363.pcaec301      | 0.089642169  | 0.087562097 | 0.307755125 |
| ornithine.creatinine   | -0.011636129 | 0.011367195 | 0.307800597 |
| pcaec343.smc260        | 0.039517266  | 0.03860411  | 0.307802683 |
| smc202.pcaac341        | 0.006841218  | 0.006683353 | 0.30781853  |
| c182.c2                | -0.065133836 | 0.063633165 | 0.307836209 |
| glutamine.serine       | -0.012576458 | 0.012287458 | 0.307865995 |
| smc202.glutamicacid    | 0.061005903  | 0.059611171 | 0.307923784 |
| putrescine.pcaec406    | 0.005281896  | 0.005161368 | 0.307945023 |
| pcaec383.smc261        | -0.094878546 | 0.092717493 | 0.307965803 |
| lysopcac280.creatinine | -0.008494    | 0.008301299 | 0.30801031  |
| smc161.pcaec425        | 0.014397131  | 0.014074103 | 0.308133475 |
| c181.pcaec365          | 0.027512753  | 0.026899554 | 0.308207023 |
| c12.taurine            | -0.026369346 | 0.025782843 | 0.30822967  |
| arginine.smohc141      | 0.028128634  | 0.027503092 | 0.308231274 |
| pcaec382.smohc241      | 0.091092862  | 0.08908245  | 0.308314407 |
| pcaec445.pcaec406      | 0.002744855  | 0.002684363 | 0.308329963 |
| pcaac402.pcaac363      | -0.023110216 | 0.02260923  | 0.308507448 |
| c51.smc260             | 0.022429866  | 0.021948549 | 0.308615497 |
| serine.pcaac300        | -0.081313282 | 0.079570589 | 0.308628767 |
| c4.smc240              | 0.054031815  | 0.05287384  | 0.308629004 |
| pcaac425.pcaac385      | -0.031903838 | 0.031221759 | 0.308654678 |
| pcaac364.arginine      | 0.045200296  | 0.044238953 | 0.308709202 |
| arginine.smc180        | -0.005725683 | 0.005604953 | 0.30879928  |
| pcaec403.pcaec340      | -0.061036646 | 0.059750669 | 0.308807466 |
| pcaec322.lysopcac203   | 0.021960864  | 0.021499373 | 0.308834386 |
| pcaac404.spermidine    | -0.072105161 | 0.070593897 | 0.308861508 |
| pcaac341.pcaec406      | 0.009614569  | 0.009414125 | 0.30891628  |
| pcaec380.histidine     | -0.092054292 | 0.09014431  | 0.308965239 |
| lysopcac182.c51dc      | 0.14338077   | 0.140408598 | 0.30897469  |
| lysopcac182.c101       | -0.009707404 | 0.009506653 | 0.308998832 |
| pcaec382.smc180        | -0.002989546 | 0.002928512 | 0.309128958 |
| c12.c141               | 0.104927072  | 0.10279246  | 0.309164364 |
| pcaec445.smc241        | -0.098869617 | 0.096865132 | 0.309198678 |
| c101.pcaec386          | 0.009781844  | 0.009583609 | 0.309202808 |
| pcaec423.smohc222      | 0.006767983  | 0.006630996 | 0.309215214 |
| pcaac380.pcaac281      | 0.001762117  | 0.001726679 | 0.309278988 |
| lysopcac203.c142       | -0.059836749 | 0.05863375  | 0.309281975 |
| lysopcac203.creatinine | -0.008637748 | 0.008464384 | 0.309298806 |

|                               |              |             |             |
|-------------------------------|--------------|-------------|-------------|
| c51dc.creatinine              | -0.012421243 | 0.012175987 | 0.309458942 |
| pcaac403.pcaec444             | -0.153204603 | 0.150202296 | 0.30953177  |
| pcaac361.pcaec382             | 0.007013394  | 0.006877065 | 0.309609649 |
| putrescine.lysopcac204        | -0.02692294  | 0.026399873 | 0.309614558 |
| pcaac405.pcaec361             | -0.010759692 | 0.010550777 | 0.309620414 |
| lysopcac182.pcaac383          | 0.015600998  | 0.015298381 | 0.309629813 |
| pcaec343.pcaec360             | -0.005744162 | 0.005633249 | 0.309673274 |
| pcaec364.c51                  | 0.027475155  | 0.026949254 | 0.309755785 |
| c5.asymmetricdimethylarginine | 0.032293663  | 0.031678249 | 0.309797123 |
| lysopcac182.pcaec342          | 0.080144996  | 0.078618291 | 0.309800828 |
| smohc241.pcaec443             | -0.056699135 | 0.055622426 | 0.309830027 |
| pcaec381.pcaec362             | 0.01305823   | 0.01281381  | 0.309963731 |
| lysopcac161.c101              | -0.010504286 | 0.010307983 | 0.309978378 |
| pcaac322.pcaac426             | 0.0979773    | 0.096157154 | 0.31003273  |
| leucine.c51                   | 0.02994343   | 0.029389033 | 0.310063393 |
| creatinine.glycine            | 0.041949377  | 0.041177253 | 0.310116766 |
| pcaac405.serine               | -0.023903589 | 0.023466619 | 0.310178417 |
| pcaac343.pcaac363             | 0.012277319  | 0.012052956 | 0.310181372 |
| pcaec445.c2                   | -0.036945609 | 0.036272435 | 0.310207801 |
| pcaec423.lysopcac180          | -0.077912965 | 0.076496991 | 0.310230826 |
| c16.pcaec403                  | 0.033686815  | 0.033078208 | 0.310283448 |
| smohc141.pcaec445             | -0.03162885  | 0.031060858 | 0.310336741 |
| c8.pcaec363                   | -0.018690613 | 0.018355124 | 0.310340876 |
| pcaac300.creatinine           | -0.008995036 | 0.008833975 | 0.310362487 |
| pcaec444.pcaac363             | -0.015901806 | 0.015618679 | 0.310411971 |
| pcaec362.pcaac405             | -0.056366386 | 0.05538417  | 0.310598022 |
| pcaac366.pcaac383             | 0.019185518  | 0.018856224 | 0.310726491 |
| lysopcac182.creatinine        | -0.006996844 | 0.006876905 | 0.310737153 |
| pcaec406.lysopcac170          | 0.028942047  | 0.028447156 | 0.31075802  |
| pcaec403.creatinine           | -0.015151584 | 0.014893017 | 0.310774716 |
| pcaac386.pcaac366             | -0.048075382 | 0.047255836 | 0.310783661 |
| pcaec385.h1                   | 0.002683034  | 0.002637398 | 0.310802253 |
| glutamine.lysopcac182         | -0.03951677  | 0.038853479 | 0.310912147 |
| lysopcac280.smc180            | -0.005172172 | 0.0050862   | 0.310992085 |
| smc261.smc180                 | 0.01081352   | 0.01063586  | 0.311086437 |
| pcaac386.h1                   | 0.003245203  | 0.003192045 | 0.311110409 |
| pcaec444.pcaec445             | -0.113660768 | 0.111823269 | 0.311215306 |
| smc181.pcaec406               | 0.021547076  | 0.021202423 | 0.311299163 |
| pcaec301.smohc141             | 0.006273124  | 0.006173099 | 0.311323828 |
| pcaac366.pcaec340             | -0.055031616 | 0.054155818 | 0.3113388   |
| c101.pcaac422                 | 0.013507224  | 0.013292762 | 0.311356874 |
| pcaac381.pcaec362             | 0.024337348  | 0.023952324 | 0.31138491  |
| lysopcac204.c12               | 0.078967535  | 0.07772464  | 0.311424579 |



|                               |              |             |             |
|-------------------------------|--------------|-------------|-------------|
| c4.pcaac403                   | 0.01382162   | 0.013606705 | 0.3115177   |
| pcaec322.smc260               | 0.039107049  | 0.038501807 | 0.311553257 |
| pcaec406.pcaec443             | -0.064828259 | 0.063834784 | 0.311627594 |
| pcaec322.pcaec406             | 0.007855753  | 0.007737155 | 0.311739073 |
| c16.asparticacid              | 0.030846667  | 0.030381515 | 0.311747627 |
| pcaec385.smc180               | 0.022220682  | 0.021887471 | 0.311788725 |
| lysopcac160.pcaec401          | -0.0954986   | 0.0940679   | 0.31179566  |
| c51.pcaec380                  | -0.041396488 | 0.040778991 | 0.31182733  |
| pcaac404.pcaec362             | -0.018136149 | 0.017865729 | 0.311830315 |
| pcaac363.pcaac405             | 0.088985675  | 0.087659457 | 0.311833656 |
| c142.alphaaminoadipicacid     | 0.012804716  | 0.012616899 | 0.311949092 |
| lysopcac280.pcaec406          | 0.008967243  | 0.00883828  | 0.312089123 |
| c14.putrescine                | -0.049131119 | 0.048428881 | 0.312132369 |
| c162.pcaac422                 | 0.074483059  | 0.073418966 | 0.312135678 |
| lysopcac204.pcaac383          | 0.006704227  | 0.006608484 | 0.312138343 |
| pcaac385.c141                 | -0.033800208 | 0.033318372 | 0.312150828 |
| h1.asparticacid               | -0.013919411 | 0.013722443 | 0.312202081 |
| lysopcac160.lysopcac181       | -0.077224838 | 0.07613293  | 0.312207582 |
| pcaec404.pcaec443             | -0.160629651 | 0.158368748 | 0.31223892  |
| smc202.pcaec382               | 0.0086237    | 0.00850281  | 0.312266784 |
| alphaaminoadipicacid.smohc141 | -0.011748557 | 0.011584093 | 0.312276363 |
| pcaec422.histidine            | -0.098087192 | 0.096716997 | 0.312290795 |
| pcaec341.alanine              | -0.016424774 | 0.016196108 | 0.312313834 |
| pcaec341.lysopcac180          | -0.056183905 | 0.055408328 | 0.312371406 |
| pcaac405.smohc221             | 0.026155     | 0.025795288 | 0.312396416 |
| lysopcac182.serine            | -0.013955092 | 0.013764969 | 0.312459575 |
| pcaec360.glycine              | 0.045107349  | 0.044505413 | 0.31259609  |
| pcaac362.leucine              | -0.025417723 | 0.025079414 | 0.312612971 |
| smc202.pcaac420               | -0.072602811 | 0.07164355  | 0.312660621 |
| c141oh.asparticacid           | 0.043547089  | 0.042972624 | 0.312670707 |
| acetylmethionine.pcaac364     | 0.062202314  | 0.061383223 | 0.312682256 |
| pcaec340.pcaac364             | -0.055569755 | 0.054845329 | 0.312746654 |
| serotonin.valine              | 0.066915069  | 0.06605473  | 0.312834155 |
| smc261.pcaac425               | 0.103236309  | 0.10191204  | 0.312848628 |
| isoleucine.kynurenine         | -0.008216129 | 0.008111138 | 0.312872517 |
| lysopcac182.pcaac403          | -0.003061386 | 0.003022341 | 0.312884562 |
| pcaec386.glutamicacid         | 0.046965314  | 0.046367576 | 0.312897621 |
| lysine.pcaac300               | -0.040925235 | 0.040405142 | 0.31290682  |
| pcaec321.prolinr              | 0.022535113  | 0.022248886 | 0.312910252 |
| pcaec402.c101                 | 0.040276903  | 0.039766678 | 0.312926567 |
| pcaec341.pcaec424             | 0.007050487  | 0.006961486 | 0.31294831  |
| pcaac341.methionine           | -0.040712005 | 0.040198096 | 0.312948486 |
| pcaec364.pcaac403             | -0.004204863 | 0.004151993 | 0.312972643 |

|                            |              |             |             |
|----------------------------|--------------|-------------|-------------|
| lysopcac161.smc180         | -0.019064965 | 0.018825353 | 0.312975272 |
| lysopcac203.lysopcac181    | -0.077943232 | 0.077005534 | 0.313237714 |
| pcaec381.smc180            | -0.003823376 | 0.00377742  | 0.313243016 |
| pcaec340.pcaac420          | -0.110982245 | 0.109650216 | 0.313251545 |
| pcaac402.c2                | 0.141803715  | 0.14011309  | 0.313290529 |
| asparticacid.c182          | -0.049933236 | 0.049349707 | 0.313405721 |
| c10.lysopcac160            | 0.020172867  | 0.019938555 | 0.313440333 |
| c12.tyrosine               | 0.044912124  | 0.044393609 | 0.313474532 |
| pcaec385.pcaec444          | 0.098107853  | 0.096980886 | 0.31350286  |
| glycine.pcaac281           | 0.003219835  | 0.003182869 | 0.313505921 |
| glycine.methionine         | 0.02908069   | 0.028752067 | 0.313593871 |
| smc160.pcaec363            | -0.0595075   | 0.058836881 | 0.313608942 |
| pcaac281.c18               | 0.029287545  | 0.028960485 | 0.313658833 |
| pcaac361.prolinr           | 0.061834271  | 0.06114385  | 0.313659563 |
| c142.lysopcac280           | -0.012407373 | 0.012269156 | 0.313672133 |
| c182.putrescine            | -0.030291309 | 0.029954703 | 0.313685586 |
| pcaec321.pcaac425          | 0.115403728  | 0.114121921 | 0.313688095 |
| smohc222.pcaec342          | -0.140954416 | 0.139389291 | 0.313689749 |
| pcaec383.smc180            | -0.003654623 | 0.003614549 | 0.313757254 |
| serine.pcaec382            | -0.013219578 | 0.013076021 | 0.313808848 |
| pcaec301.pcaec406          | 0.01603419   | 0.015865239 | 0.313966013 |
| smohc221.c2                | 0.060713455  | 0.060079205 | 0.314010028 |
| lysopcac140.pcaac383       | -0.013205884 | 0.013069494 | 0.31406782  |
| pcaac300.pcaec425          | 0.018106353  | 0.017921637 | 0.314129344 |
| pcaec382.pcaec361          | 0.018867522  | 0.018675305 | 0.314136138 |
| pcaec342.pcaac405          | -0.05168163  | 0.051157323 | 0.31415698  |
| pcaec301.pcaac383          | -0.006600599 | 0.006534415 | 0.314214448 |
| smc180.alanine             | -0.03055987  | 0.030257305 | 0.314275925 |
| methioninesulfoxide.smc240 | -0.054067476 | 0.053542974 | 0.314373235 |
| c16.pcaec425               | 0.021598689  | 0.021395126 | 0.314507646 |
| h1.kynurenine              | -0.014129645 | 0.01399685  | 0.314520522 |
| c51dc.pcaec406             | -0.005037516 | 0.004990617 | 0.314563487 |
| pcaac365.c51               | 0.068184962  | 0.067554473 | 0.314594272 |
| ornithine.smc180           | 0.020103696  | 0.01991781  | 0.314594465 |
| pcaec363.creatinine        | -0.006134684 | 0.006079044 | 0.314680341 |
| pcaec425.smc241            | -0.065524433 | 0.064931396 | 0.314689711 |
| pcaac422.c5                | -0.032548302 | 0.032260011 | 0.314783742 |
| pcaac323.methionine        | -0.048867719 | 0.048435483 | 0.31478973  |
| lysopcac170.alanine        | -0.038570855 | 0.038230144 | 0.314795397 |
| methionine.serine          | -0.027296439 | 0.027057163 | 0.31482826  |
| glutamicacid.pcaac426      | 0.143094873  | 0.141860843 | 0.314897303 |
| pcaac281.pcaac426          | 0.047221062  | 0.04682247  | 0.314986241 |
| pcaec342.pcaec301          | -0.05045415  | 0.050035577 | 0.315056671 |

|                               |              |             |             |
|-------------------------------|--------------|-------------|-------------|
| pcaac361.lysopcac161          | 0.107719644  | 0.106838611 | 0.315113633 |
| pcaac344.pcaac365             | -0.052923983 | 0.052500889 | 0.315203351 |
| pcaac385.c51                  | 0.043746258  | 0.04339769  | 0.315216186 |
| pcaec340.pcaec404             | 0.03095748   | 0.030712903 | 0.315249011 |
| pcaac406.c3                   | 0.03422058   | 0.033950436 | 0.315252031 |
| lysopcac203.pcaec322          | 0.080971629  | 0.080332699 | 0.315253694 |
| creatinine.serine             | -0.026322721 | 0.026119651 | 0.315339303 |
| pcaec383.pcaac383             | 0.010689989  | 0.010609437 | 0.315426453 |
| lysopcac140.pcaac281          | -0.001130888 | 0.001122394 | 0.315438356 |
| pcaac420.h1                   | 0.010855261  | 0.01077406  | 0.315453123 |
| pcaac365.h1                   | 0.002178174  | 0.002161931 | 0.31546432  |
| pcaac363.smc161               | -0.061497247 | 0.061044975 | 0.315514329 |
| smc240.alanine                | -0.062542164 | 0.062086506 | 0.315547709 |
| methionine.pcaac363           | -0.014549876 | 0.014445011 | 0.315585747 |
| pcaac360.c5                   | 0.028869007  | 0.028663364 | 0.315626525 |
| pcaac320.pcaac341             | 0.021574235  | 0.021429472 | 0.315827195 |
| pcaec341.serotonin            | -0.100056091 | 0.099417797 | 0.315987674 |
| pcaec420.valine               | 0.040778988  | 0.04052176  | 0.316022369 |
| pcaec401.c141oh               | -0.107908203 | 0.107236375 | 0.316062127 |
| citruline.pcaec444            | 0.121118122  | 0.120378918 | 0.316121682 |
| pcaec384.pcaac341             | 0.008041708  | 0.007992988 | 0.316143387 |
| pcaac386.pcaac365             | 0.078735128  | 0.07826156  | 0.3161646   |
| pcaec300.smc181               | 0.043958866  | 0.043695062 | 0.316171167 |
| smohc141.pcaac384             | 0.049128372  | 0.048843567 | 0.316270107 |
| alphaaminoadipicacid.pcaec445 | -0.038225674 | 0.03801017  | 0.316347451 |
| smc202.serotonin              | -0.100875263 | 0.1003292   | 0.31645626  |
| asparticacid.pcaec421         | 0.004287916  | 0.004264755 | 0.316461952 |
| pcaac321.pcaac322             | 0.111458895  | 0.11087174  | 0.316526717 |
| phenylalanine.pcaec385        | 0.04575973   | 0.045520549 | 0.316546599 |
| pcaec402.smc180               | -0.004151258 | 0.004129613 | 0.316552885 |
| pcaac321.creatinine           | -0.011684288 | 0.011623847 | 0.316572799 |
| c10.pcaec406                  | -0.005620801 | 0.005592021 | 0.316598244 |
| lysopcac203.pcaec424          | 0.006880359  | 0.006849611 | 0.316913881 |
| pcaac425.smc181               | -0.011011871 | 0.01096484  | 0.317009734 |
| pcaec342.arginine             | -0.050412113 | 0.050204942 | 0.317087871 |
| pcaec425.phenylalanine        | 0.056057727  | 0.05582815  | 0.31709474  |
| pcaac385.lysopcac181          | 0.029803184  | 0.029684051 | 0.317142204 |
| alanine.pcaec385              | 0.049644618  | 0.04944632  | 0.317143641 |
| pcaec402.pcaac406             | -0.076495533 | 0.076191331 | 0.317152181 |
| c14.pcaac405                  | 0.054627357  | 0.054412712 | 0.317175155 |
| lysopcac161.pcaac383          | -0.013647345 | 0.01359393  | 0.317182567 |
| pcaec445.pcaac425             | 0.084423161  | 0.084103177 | 0.317242446 |
| pcaec424.pcaac365             | -0.061428103 | 0.061195387 | 0.317243326 |

|                               |              |             |             |
|-------------------------------|--------------|-------------|-------------|
| glycine.asparagine            | -0.009903113 | 0.00986657  | 0.317290968 |
| pcaac406.c14                  | -0.063781378 | 0.063555052 | 0.317359456 |
| pcaac420.lysopcac161          | 0.096878514  | 0.09653848  | 0.317378117 |
| lysopcac160.pcaec364          | -0.011523272 | 0.011484352 | 0.317442153 |
| alphaaminoadipicacid.pcaec446 | -0.056644409 | 0.056457383 | 0.31747882  |
| pcaac361.taurine              | 0.060151978  | 0.059959247 | 0.317526074 |
| asparagine.pcaec301           | -0.085887703 | 0.085623395 | 0.317587359 |
| smc261.pcaac341               | 0.014354894  | 0.014311866 | 0.317626031 |
| c18.pcaec445                  | -0.076079265 | 0.075853346 | 0.317639519 |
| smc241.pcaac341               | 0.010006997  | 0.009977395 | 0.317645064 |
| lysopcac204.ornithine         | 0.036801149  | 0.036692902 | 0.317653116 |
| c5.c51dc                      | 0.258216556  | 0.257459899 | 0.317658477 |
| pcaec403.smohc241             | 0.077069483  | 0.076851544 | 0.317708039 |
| pcaec341.pcaac240             | -0.018561647 | 0.018509969 | 0.317729175 |
| pcaac425.pcaec404             | 0.020753626  | 0.020696986 | 0.317755748 |
| pcaec406.pcaec362             | 0.02379037   | 0.023726359 | 0.317774369 |
| pcaac360.pcaec406             | -0.018563849 | 0.018519555 | 0.317921611 |
| glutamine.pcaac422            | -0.013493592 | 0.013461711 | 0.317932881 |
| c51.pcaec340                  | -0.040357043 | 0.040265737 | 0.317981343 |
| pcaec445.leucine              | -0.005660705 | 0.005648741 | 0.31805331  |
| glutamicacid.serine           | 0.037674502  | 0.037596764 | 0.31807752  |
| smohc241.lysopcac181          | 0.039397532  | 0.039318609 | 0.318106606 |
| histidine.smohc241            | 0.107903838  | 0.107691786 | 0.318124981 |
| pcaac424.phenylalanine        | 0.079293153  | 0.079142316 | 0.318155382 |
| c162.pcaac320                 | -0.063551575 | 0.063441718 | 0.318239255 |
| pcaec361.pcaec424             | 0.007826552  | 0.007814217 | 0.318312976 |
| c101.pcaec424                 | -0.015126615 | 0.01510513  | 0.318388124 |
| smohc141.pcaec301             | -0.062876145 | 0.062787838 | 0.318395809 |
| glycine.smc180                | 0.029563537  | 0.02952303  | 0.318412364 |
| serotonin.smohc141            | 0.0071999    | 0.007190886 | 0.318469442 |
| pcaac364.pcaac426             | 0.067075047  | 0.067021979 | 0.31869185  |
| pcaec444.alanine              | -0.013180605 | 0.01317211  | 0.31876261  |
| pcaac420.c2                   | -0.044447346 | 0.044419034 | 0.318766255 |
| c141oh.c14                    | -0.05347039  | 0.053436972 | 0.318772042 |
| pcaec363.smohc141             | 0.012536327  | 0.01252911  | 0.318795825 |
| pcaec341.pcaac406             | -0.042049299 | 0.042025858 | 0.318804615 |
| c14.alanine                   | 0.029078671  | 0.029063563 | 0.3188229   |
| c16.pcaec424                  | 0.015704603  | 0.015698504 | 0.318886198 |
| pcaec361.pcaac341             | 0.010905437  | 0.010901711 | 0.318908691 |
| pcaec403.pcaec321             | 0.049009685  | 0.048993029 | 0.318909597 |
| smohc222.pcaec301             | -0.075403501 | 0.075382451 | 0.318938863 |
| pcaac240.c8                   | -0.07210462  | 0.072087133 | 0.318956536 |
| smc260.pcaec406               | 0.004151566  | 0.004151004 | 0.319008226 |

|                                |              |             |             |
|--------------------------------|--------------|-------------|-------------|
| pcaac361.serine                | -0.018338211 | 0.0183362   | 0.319020617 |
| smc180.lysopcac280             | 0.010599949  | 0.01059923  | 0.319040819 |
| pcaec365.histidine             | -0.072187963 | 0.072199204 | 0.319148575 |
| c141oh.pcaac422                | 0.035364235  | 0.035370056 | 0.319152848 |
| pcaac323.pcaec444              | 0.09143969   | 0.091468789 | 0.319226913 |
| pcaac364.smohc221              | 0.059971065  | 0.060002635 | 0.319327249 |
| pcaec403.asymmetricdimethylar; | -0.021500993 | 0.02151645  | 0.31942     |
| smc202.alanine                 | -0.011204959 | 0.011213498 | 0.3194408   |
| asymmetricdimethylarginine.pca | 0.05783974   | 0.057894183 | 0.319527144 |
| pcaec421.c5                    | 0.029191205  | 0.02921968  | 0.319543614 |
| pcaec342.smohc161              | 0.009229055  | 0.009238689 | 0.319576597 |
| pcaac361.pcaec446              | -0.034381776 | 0.034418086 | 0.319582443 |
| pcaac366.c51                   | 0.140936233  | 0.141116933 | 0.319691319 |
| acetylmithoine.pcaac403        | -0.004049019 | 0.00405453  | 0.319729337 |
| alanine.pcaec322               | 0.046870565  | 0.046937014 | 0.319756603 |
| pcaec341.pcaac380              | 0.080554846  | 0.080682327 | 0.319835955 |
| pcaac300.pcaec421              | 0.002611053  | 0.002615208 | 0.319840134 |
| phenylalanine.lysopcac180      | 0.05576457   | 0.055854144 | 0.319847383 |
| c101.smohc141                  | 0.027378363  | 0.02742724  | 0.319933524 |
| pcaac365.ornithine             | 0.040882648  | 0.040955724 | 0.319934598 |
| methioninesulfoxide.c14        | 0.101971184  | 0.102165916 | 0.319993421 |
| pcaac380.c162                  | -0.064389269 | 0.064516212 | 0.32002317  |
| pcaec386.pcaec404              | -0.011370752 | 0.011393569 | 0.320040083 |
| pcaec423.pcaec383              | -0.095099986 | 0.095300003 | 0.320086559 |
| pcaac385.serine                | -0.030712555 | 0.030785415 | 0.320216018 |
| pcaac360.c162                  | -0.059598027 | 0.059745981 | 0.320269037 |
| pcaac403.pcaec424              | 0.012873332  | 0.012906713 | 0.320322191 |
| pcaec424.lysopcac181           | -0.079570614 | 0.079787322 | 0.320384907 |
| smohc141.pcaac360              | 0.058460939  | 0.058621124 | 0.320392869 |
| smohc141.pcaac341              | 0.011914076  | 0.011947796 | 0.320436244 |
| smc181.pcaac323                | -0.117224801 | 0.117571329 | 0.320496757 |
| histidine.pcaac321             | 0.038382903  | 0.038498593 | 0.320524645 |
| c5.creatinine                  | -0.017906739 | 0.017960926 | 0.320530407 |
| lysopcac160.smc180             | -0.006469642 | 0.006489366 | 0.320541299 |
| smc180.pcaac323                | -0.127588664 | 0.127983661 | 0.320563947 |
| c12.c5                         | -0.010665597 | 0.010698765 | 0.320570675 |
| prolinr.pcaec422               | -0.039945753 | 0.04007274  | 0.320603896 |
| c10.pcaac322                   | 0.053975308  | 0.054148278 | 0.320616213 |
| pcaec386.c141oh                | -0.114684806 | 0.115054949 | 0.320627207 |
| smc261.c101                    | 0.011565658  | 0.011603127 | 0.320633065 |
| pcaec420.c18                   | -0.025429015 | 0.025513647 | 0.320675599 |
| pcaec403.smc180                | -0.004028479 | 0.004041996 | 0.320688678 |
| smc260.asparticacid            | 0.050112297  | 0.050282281 | 0.320706307 |

|                          |              |             |             |
|--------------------------|--------------|-------------|-------------|
| smc240.smohc141          | -0.048829062 | 0.04900471  | 0.320804869 |
| pcaec301.smc260          | -0.038378141 | 0.038521839 | 0.320875527 |
| pcaac323.putrescine      | -0.057371014 | 0.057587347 | 0.320888248 |
| pcaac323.c14             | -0.017245315 | 0.017310605 | 0.320895533 |
| pcaec404.kynurenine      | 0.010154531  | 0.010195478 | 0.321013911 |
| pcaec386.putrescine      | -0.054965953 | 0.055188034 | 0.321017729 |
| c10.pcaac363             | -0.01129024  | 0.011336316 | 0.321037261 |
| lysopcac281.pcaec404     | 0.08469384   | 0.085045323 | 0.321070409 |
| pcaec406.pcaec385        | -0.093454622 | 0.093854796 | 0.321133774 |
| pcaec381.c51             | -0.098871489 | 0.099295272 | 0.321135786 |
| pcaec405.methionine      | -0.049967604 | 0.050188899 | 0.321204231 |
| phenylalanine.valine     | 0.098863461  | 0.099312256 | 0.321257402 |
| pcaac384.pcaac361        | -0.050889606 | 0.051129838 | 0.321344327 |
| phenylalanine.pcaac383   | -0.012260729 | 0.012320005 | 0.321398999 |
| pcaec401.pcaec322        | 0.092857683  | 0.093314819 | 0.321441409 |
| asparticacid.smc161      | 0.07144476   | 0.071801575 | 0.321475619 |
| lysopcac160.pcaac365     | -0.07302264  | 0.073398254 | 0.321547353 |
| pcaac402.smohc161        | 0.026847003  | 0.026985821 | 0.321560263 |
| pcaec424.kynurenine      | 0.005389645  | 0.005417918 | 0.321596263 |
| lysopcac281.glutamicacid | 0.072065077  | 0.072447827 | 0.321627633 |
| asparagine.pcaec406      | 0.001484001  | 0.001492079 | 0.321690836 |
| c8.lysopcac182           | -0.099508635 | 0.100058893 | 0.321732454 |
| pcaec300.alanine         | -0.017670156 | 0.017768512 | 0.321749949 |
| pcaac323.c142            | 0.023000658  | 0.023129245 | 0.321761634 |
| pcaac341.isoleucine      | 0.027253455  | 0.027406306 | 0.321770216 |
| pcaec362.pcaec406        | 0.006445028  | 0.006481221 | 0.321773704 |
| c3.c10                   | 0.016703527  | 0.016798937 | 0.321819812 |
| pcaac404.pcaec360        | -0.004810012 | 0.004837689 | 0.321840057 |
| pcaec420.leucine         | -0.007488809 | 0.007532706 | 0.321891586 |
| c5.c12                   | -0.04798526  | 0.048275251 | 0.32197867  |
| c4.pcaec384              | 0.08641891   | 0.086951146 | 0.322033994 |
| pcaac320.leucine         | -0.005201321 | 0.00523363  | 0.322059399 |
| c141oh.lysopcac161       | -0.088474618 | 0.089033239 | 0.322108326 |
| pcaac322.pcaec301        | -0.075037183 | 0.07552004  | 0.322166292 |
| pcaec404.smohc241        | 0.080813448  | 0.081337045 | 0.322187456 |
| pcaac401.pcaac341        | 0.005554888  | 0.005591318 | 0.322225375 |
| pcaac361.lysopcac182     | -0.013928602 | 0.014020528 | 0.322245301 |
| pcaec340.alanine         | -0.019952406 | 0.020086809 | 0.322310597 |
| lysopcac204.leucine      | 0.033143934  | 0.033371931 | 0.322378993 |
| smc161.smohc241          | 0.077543162  | 0.078084475 | 0.322427747 |
| spermidine.c162          | 0.053158536  | 0.053531008 | 0.322440198 |
| alanine.pcaec421         | -0.002478867 | 0.002496662 | 0.322522399 |
| c142.c51                 | 0.039319087  | 0.039611986 | 0.322652014 |

|                            |              |             |             |
|----------------------------|--------------|-------------|-------------|
| smc241.c141oh              | -0.096209324 | 0.096936877 | 0.322706046 |
| c162.pcaec363              | -0.01056598  | 0.01064617  | 0.322719094 |
| pcaec404.smc180            | -0.004093801 | 0.004124924 | 0.322725273 |
| lysopcac160.pcaec422       | 0.081475961  | 0.08209841  | 0.322743118 |
| pcaec343.pcaac385          | -0.026978761 | 0.027185103 | 0.322747253 |
| c16.c2                     | 0.108225366  | 0.109067934 | 0.322812806 |
| pcaec380.methionine        | -0.047855129 | 0.048227786 | 0.322813698 |
| c162.smohc141              | 0.016461894  | 0.016591875 | 0.32286567  |
| pcaac426.prolinr           | -0.048146497 | 0.048528396 | 0.322882992 |
| pcaac385.c142              | -0.031479142 | 0.031730035 | 0.32290122  |
| pcaec364.lysopcac160       | -0.010678275 | 0.010765319 | 0.322987975 |
| pcaac341.lysopcac181       | 0.032584134  | 0.032852245 | 0.323024678 |
| pcaac424.lysopcac182       | -0.116585851 | 0.117546091 | 0.323028538 |
| prolinr.tyrosine           | -0.088290566 | 0.08902053  | 0.323043559 |
| c141.pcaec380              | -0.053949676 | 0.054395871 | 0.323044908 |
| lysopcac204.asparticacid   | 0.025455584  | 0.025673299 | 0.323179834 |
| citruline.pcaec343         | 0.08825561   | 0.089028027 | 0.323275091 |
| isoleucine.lysopcac182     | 0.03416682   | 0.034466238 | 0.323280529 |
| methioninesulfoxide.smc180 | -0.00305972  | 0.003086876 | 0.323334128 |
| pcaac363.pcaac380          | 0.059270143  | 0.059799832 | 0.323363422 |
| smc241.pcaec321            | 0.089224459  | 0.090031964 | 0.323417606 |
| pcaec443.pcaac281          | -0.00375316  | 0.003787811 | 0.32350471  |
| pcaac343.glycine           | -0.111415139 | 0.112443865 | 0.32350504  |
| pcaac300.c51               | 0.062391961  | 0.062971483 | 0.323531384 |
| pcaac360.pcaac364          | -0.068017233 | 0.068649906 | 0.323537717 |
| pcaec404.smc261            | -0.078262423 | 0.07900226  | 0.323610134 |
| pcaec421.pcaac341          | 0.005832114  | 0.005887321 | 0.323616205 |
| pcaac402.smc180            | -0.003274678 | 0.003306211 | 0.323694213 |
| lysine.lysopcac161         | -0.092626253 | 0.093528487 | 0.32374734  |
| lysopcac161.pcaac341       | 0.007132161  | 0.007201843 | 0.323761413 |
| pcaac300.methionine        | -0.041079819 | 0.041485243 | 0.323808732 |
| pcaac342.pcaec446          | -0.055583758 | 0.056139848 | 0.323873358 |
| methionine.pcaac405        | 0.065066969  | 0.065730035 | 0.323962124 |
| serotonin.spermidine       | -0.072329379 | 0.073072027 | 0.323998907 |
| pcaac323.pcaac402          | -0.042248432 | 0.0426884   | 0.324068688 |
| pcaac360.lysine            | 0.119169486  | 0.120418644 | 0.324101318 |
| pcaac403.pcaac361          | 0.053375425  | 0.053936087 | 0.324111778 |
| pcaac321.smohc241          | 0.041541947  | 0.041981619 | 0.324149791 |
| pcaac363.pcaac240          | -0.019220424 | 0.019423904 | 0.324151158 |
| c12.lysine                 | 0.065110735  | 0.065808482 | 0.32421301  |
| lysopcac140.ornithine      | 0.032054948  | 0.032399954 | 0.324235261 |
| smc240.phenylalanine       | -0.050755514 | 0.051308047 | 0.324294023 |
| pcaec406.c181              | -0.016456383 | 0.016636712 | 0.324328281 |

|                         |              |             |             |
|-------------------------|--------------|-------------|-------------|
| pcaac421.pcaec364       | -0.010935943 | 0.011057254 | 0.324392562 |
| pcaec380.creatinine     | -0.011769549 | 0.011903614 | 0.324534672 |
| smc181.pcaac240         | -0.011293887 | 0.011424846 | 0.32463222  |
| histidine.pcaac323      | 0.120039729  | 0.121452467 | 0.324714848 |
| c162.lysopcac180        | -0.03980539  | 0.040278327 | 0.324768359 |
| pcaac401.pcaac323       | -0.118659018 | 0.120094112 | 0.324869856 |
| c141oh.pcaac403         | 0.004370258  | 0.004423918 | 0.324957494 |
| pcaac344.c14            | 0.061146091  | 0.061897669 | 0.324963799 |
| histidine.pcaec406      | 0.005780588  | 0.005852093 | 0.325001152 |
| ornithine.asparticacid  | 0.024386033  | 0.02469161  | 0.325077767 |
| pcaec361.pcaac363       | -0.017490253 | 0.017711055 | 0.325122276 |
| c51.c12                 | -0.072862349 | 0.073782658 | 0.325125361 |
| pcaec444.asparagine     | -0.01424522  | 0.014427548 | 0.325205545 |
| pcaec340.h1             | 0.002105254  | 0.002132314 | 0.325231476 |
| pcaac341.lysopcac180    | -0.04483515  | 0.045414444 | 0.325263278 |
| pcaac300.pcaec404       | 0.01740117   | 0.017626196 | 0.325268563 |
| smohc221.pcaac383       | 0.005697741  | 0.005771773 | 0.325297839 |
| glycine.pcaec322        | 0.037296515  | 0.03778801  | 0.325385828 |
| pcaec300.glutamicacid   | 0.05013768   | 0.050799714 | 0.325398324 |
| pcaac404.pcaec380       | 0.046132752  | 0.046743386 | 0.32541362  |
| glutamine.pcaac320      | -0.024735946 | 0.025066066 | 0.32546563  |
| c2.pcaac383             | -0.009013997 | 0.009134997 | 0.325502593 |
| pcaec322.serotonin      | -0.092120003 | 0.093360775 | 0.325524292 |
| pcaac281.pcaec406       | 0.003627638  | 0.003676989 | 0.325588429 |
| c3.pcaec340             | -0.030007772 | 0.030418574 | 0.325629295 |
| smc202.isoleucine       | 0.024561834  | 0.024898699 | 0.325641251 |
| pcaec321.pcaac422       | -0.015847822 | 0.01606577  | 0.325659089 |
| acetylmithoine.pcaec424 | 0.021871416  | 0.022174157 | 0.325701602 |
| pcaac384.c51            | 0.027118258  | 0.027497026 | 0.325761208 |
| smc202.pcaac240         | -0.009790569 | 0.009927331 | 0.325761892 |
| pcaec444.c5             | 0.019149757  | 0.01942046  | 0.325841483 |
| pcaec425.spermidine     | -0.067053561 | 0.068011778 | 0.325914785 |
| serine.pcaec383         | -0.083305139 | 0.084496968 | 0.325922612 |
| pcaac386.pcaec422       | -0.024731587 | 0.025085446 | 0.325923188 |
| pcaac381.pcaec385       | -0.050765058 | 0.051493516 | 0.325942958 |
| pcaac364.serotonin      | -0.106926016 | 0.108464386 | 0.325960848 |
| lysine.pcaec340         | -0.042665647 | 0.043282548 | 0.325994931 |
| smohc221.pcaac385       | -0.026014934 | 0.026394385 | 0.326055235 |
| pcaac424.kynurenine     | 0.014773274  | 0.014989599 | 0.326082381 |
| smc161.serine           | -0.032556611 | 0.033034204 | 0.326095026 |
| pcaec421.smc180         | -0.003801401 | 0.003857176 | 0.326096276 |
| spermidine.c101         | -0.006276166 | 0.006368677 | 0.326128507 |
| pcaac363.pcaec424       | 0.00705231   | 0.007156903 | 0.326171683 |



|                                  |              |             |             |
|----------------------------------|--------------|-------------|-------------|
| pcaec405.pcaec340                | 0.050467003  | 0.051216465 | 0.326180973 |
| pcaec385.pcaec422                | -0.070095605 | 0.071140503 | 0.326207678 |
| pcaec344.smohc161                | -0.01706119  | 0.017315971 | 0.326220311 |
| pcaec322.c101                    | -0.008224696 | 0.008350415 | 0.326387588 |
| pcaec384.alanine                 | -0.027356    | 0.027777274 | 0.326441768 |
| creatinine.pcaec341              | 0.022120808  | 0.022467439 | 0.32657004  |
| pcaec361.pcaec323                | -0.098882978 | 0.100432594 | 0.326570654 |
| pcaec403.smc180                  | -0.003476343 | 0.003531303 | 0.326636307 |
| serotonin.pcaec406               | -0.023051712 | 0.023416404 | 0.326641544 |
| pcaec360.alanine                 | -0.016024468 | 0.016285717 | 0.326870485 |
| pcaec360.pcaec380                | -0.068398392 | 0.069516608 | 0.326892037 |
| pcaec342.lysopcac180             | 0.097356656  | 0.098954602 | 0.326922744 |
| pcaec444.pcaec386                | 0.034720592  | 0.035295354 | 0.32698942  |
| pcaec383.pcaec322                | 0.078590684  | 0.079894813 | 0.3270084   |
| pcaec401.c101                    | -0.021923891 | 0.022288336 | 0.327022274 |
| pcaec366.alphaaminoadipicacid    | -0.014080819 | 0.014315402 | 0.327039612 |
| pcaec402.pcaec362                | 0.018677619  | 0.018989771 | 0.327064658 |
| asparticacid.c142                | 0.041760317  | 0.042459609 | 0.3270802   |
| citruline.pcaec360               | -0.040517295 | 0.041204558 | 0.327183001 |
| pcaec343.smohc141                | 0.009640478  | 0.009807102 | 0.327335415 |
| serotonin.pcaec403               | -0.003665046 | 0.003729333 | 0.327457029 |
| pcaec380.smohc161                | 0.021955463  | 0.022341192 | 0.32747038  |
| c12.c51                          | 0.023925691  | 0.024349505 | 0.3275391   |
| pcaec424.pcaec364                | -0.009465624 | 0.009634084 | 0.32757855  |
| pcaec424.pcaec362                | 0.010272619  | 0.010455864 | 0.327598009 |
| arginine.pcaec405                | -0.05543809  | 0.056428609 | 0.327611739 |
| pcaec445.pcaec422                | -0.010290992 | 0.010475221 | 0.327628242 |
| pcaec406.methioninesulfoxide     | 0.030314661  | 0.03086034  | 0.327674885 |
| pcaec300.pcaec383                | 0.00402728   | 0.004099991 | 0.327700462 |
| c14.pcaec424                     | -0.015568892 | 0.015850965 | 0.327730396 |
| pcaec423.pcaec364                | -0.009936995 | 0.010117368 | 0.327746463 |
| methioninesulfoxide.asparticacid | 0.090644145  | 0.092294244 | 0.327771305 |
| c141oh.pcaec363                  | -0.014681343 | 0.01494935  | 0.327795336 |
| pcaec361.pcaec421                | 0.003456908  | 0.003520693 | 0.327888371 |
| lysopcac140.pcaec402             | 0.077492332  | 0.078933056 | 0.327954808 |
| pcaec383.prolinr                 | 0.052864242  | 0.053849398 | 0.327975514 |
| c8.pcaec363                      | -0.010994627 | 0.011199923 | 0.327992898 |
| smohc222.pcaec445                | -0.028705987 | 0.029248935 | 0.328107278 |
| pcaec401.pcaec446                | -0.060414937 | 0.06156432  | 0.328159656 |
| pcaec382.c51                     | -0.099975898 | 0.101886735 | 0.328201358 |
| pcaec366.pcaec422                | -0.040588608 | 0.041364634 | 0.328204355 |
| lysopcac161.alanine              | -0.053551569 | 0.054585271 | 0.328291187 |
| pcaec321.lysopcac181             | 0.05601146   | 0.057093253 | 0.328296328 |

|                                |              |             |             |
|--------------------------------|--------------|-------------|-------------|
| smohc141.asparagine            | 0.008404285  | 0.00856821  | 0.328386711 |
| pcaec301.c181                  | 0.014051227  | 0.014325941 | 0.328408439 |
| c181.lysopcac181               | 0.048522554  | 0.049475109 | 0.328446381 |
| pcaec406.c101                  | -0.069687488 | 0.071055841 | 0.328448457 |
| c3.smc160                      | 0.091078541  | 0.092880275 | 0.328517776 |
| pcaec341.pcaac341              | -0.028594583 | 0.02916114  | 0.328532544 |
| pcaac405.asparagine            | 0.014713055  | 0.01500591  | 0.328575537 |
| pcaac365.pcaec343              | 0.093675872  | 0.095547968 | 0.328613536 |
| pcaac321.smc161                | -0.038553327 | 0.039325209 | 0.328630708 |
| pcaec386.asymmetricdimethylar; | 0.04131321   | 0.042140398 | 0.328631271 |
| pcaec321.pcaac364              | -0.055288954 | 0.056398684 | 0.328654471 |
| pcaac381.alanine               | -0.020211952 | 0.020620842 | 0.328729432 |
| c18.pcaec361                   | -0.017284064 | 0.017634418 | 0.328748429 |
| pcaec406.pcaac361              | 0.095688509  | 0.097655742 | 0.328884647 |
| smc241.pcaac386                | 0.020542166  | 0.020966237 | 0.328924891 |
| pcaec403.pcaec342              | 0.08898221   | 0.090822365 | 0.328941942 |
| pcaac385.pcaec420              | -0.030386213 | 0.031015623 | 0.328957818 |
| c14.pcaec301                   | -0.053293149 | 0.05440594  | 0.329036624 |
| pcaac365.pcaec406              | 0.012774321  | 0.0130434   | 0.329123243 |
| methioninesulfoxide.c101       | 0.027693035  | 0.028276673 | 0.329128544 |
| pcaac386.lysopcac181           | 0.024021666  | 0.02453267  | 0.329221694 |
| pcaac362.pcaac344              | -0.053078185 | 0.054212786 | 0.329270494 |
| pcaec382.kynurenine            | 0.010608724  | 0.010837254 | 0.329348661 |
| smc180.kynurenine              | -0.004777033 | 0.004881235 | 0.329476753 |
| smc261.pcaac323                | 0.071467922  | 0.073027114 | 0.329478372 |
| pcaec443.asparticacid          | 0.059851847  | 0.061161073 | 0.329505621 |
| pcaac363.pcaec420              | -0.039758909 | 0.04062969  | 0.329518391 |
| pcaec341.phenylalanine         | 0.049980901  | 0.051086801 | 0.32962446  |
| pcaec382.pcaac363              | -0.033295724 | 0.034032994 | 0.329632299 |
| c141oh.phenylalanine           | 0.052191496  | 0.053347377 | 0.329634117 |
| lysopcac170.ornithine          | 0.02917263   | 0.029819754 | 0.329650934 |
| pcaac385.h1                    | 0.00119916   | 0.001225964 | 0.329730628 |
| pcaac404.pcaec420              | -0.041529626 | 0.042459163 | 0.329745173 |
| putrescine.pcaec402            | 0.077730685  | 0.079474681 | 0.329770586 |
| pcaec342.kynurenine            | -0.007969312 | 0.008148158 | 0.329773165 |
| pcaec405.pcaac341              | 0.005915472  | 0.006048712 | 0.329811845 |
| pcaec405.pcaac344              | 0.061254906  | 0.062645177 | 0.329893163 |
| pcaec301.pcaac403              | 0.005168579  | 0.005286639 | 0.329961696 |
| pcaec340.pcaac281              | -0.004232739 | 0.004329531 | 0.3299738   |
| pcaec424.pcaec363              | 0.04195885   | 0.042922134 | 0.330016303 |
| smc180.pcaac403                | -0.012901002 | 0.013200779 | 0.330147664 |
| c0.pcaac300                    | -0.062966139 | 0.064429463 | 0.33014916  |
| pcaac320.c14                   | -0.050382946 | 0.051562677 | 0.33023178  |

|                                 |              |             |             |
|---------------------------------|--------------|-------------|-------------|
| pcaec382.pcaec362               | 0.016996711  | 0.017400832 | 0.330401809 |
| pcaac366.pcaec343               | 0.085152148  | 0.087179556 | 0.330417252 |
| pcaec401.pcaec424               | 0.009789237  | 0.010023424 | 0.330470745 |
| smc261.lysopcac180              | 0.068162735  | 0.069797797 | 0.330501208 |
| lysopcac280.pcaac383            | -0.022634083 | 0.023180827 | 0.330580355 |
| pcaac404.smc181                 | -0.018178775 | 0.018621316 | 0.330668835 |
| phenylalanine.smc180            | -0.016173683 | 0.016568914 | 0.330712507 |
| asymmetricdimethylarginine.lysc | -0.011898491 | 0.012189485 | 0.330721771 |
| pcaac422.putrescine             | -0.044904278 | 0.046006836 | 0.330767461 |
| pcaec443.pcaac383               | 0.009086524  | 0.00931041  | 0.330807828 |
| leucine.pcaec380                | 0.045322871  | 0.046448747 | 0.330902768 |
| lysopcac203.smohc161            | 0.029000594  | 0.029723789 | 0.330947905 |
| lysopcac180.pcaec443            | 0.080225176  | 0.08222855  | 0.330964196 |
| pcaec322.pcaac360               | 0.066137293  | 0.0677924   | 0.33098932  |
| smohc161.alanine                | -0.032296326 | 0.03310585  | 0.331008215 |
| citruline.pcaac426              | -0.050905858 | 0.052184136 | 0.331029427 |
| c8.lysopcac170                  | -0.020480688 | 0.020995472 | 0.331040937 |
| pcaac365.c141oh                 | -0.082535235 | 0.084618829 | 0.331092537 |
| c12.c162                        | -0.137870307 | 0.141354911 | 0.331106454 |
| pcaec301.lysopcac181            | 0.03479697   | 0.035676462 | 0.331106668 |
| pcaac406.pcaec340               | 0.081196231  | 0.083268469 | 0.331222457 |
| spermidine.glycine              | 0.165352541  | 0.169601233 | 0.33130393  |
| pcaac404.c141oh                 | -0.137275398 | 0.140827277 | 0.33138819  |
| pcaac281.pcaec425               | 0.008945285  | 0.009178279 | 0.331469176 |
| pcaac424.c2                     | 0.118399324  | 0.121483566 | 0.331470561 |
| pcaec443.pcaac422               | -0.095227793 | 0.097732343 | 0.331588482 |
| pcaac420.pcaac403               | -0.006925839 | 0.007108463 | 0.331620328 |
| pcaec424.pcaac363               | -0.015948861 | 0.016369566 | 0.331625009 |
| c3.pcaac420                     | 0.046833038  | 0.048082894 | 0.331770091 |
| pcaec342.alanine                | -0.019811107 | 0.020340597 | 0.331788589 |
| lysopcac140.pcaac321            | -0.028040572 | 0.028793408 | 0.331845461 |
| pcaac383.pcaac420               | -0.069160756 | 0.07102591  | 0.331901902 |
| pcaac383.pcaac341               | -0.008677044 | 0.008911271 | 0.331913872 |
| asymmetricdimethylarginine.smc  | -0.024769534 | 0.025442775 | 0.332001271 |
| smohc221.pcaac403               | -0.00777238  | 0.007984275 | 0.332039907 |
| pcaac281.creatinine             | -0.005440485 | 0.005589129 | 0.332067708 |
| pcaec364.putrescine             | -0.100066461 | 0.102813036 | 0.33212665  |
| serine.smc180                   | -0.009912645 | 0.010185164 | 0.33214751  |
| pcaec404.pcaac361               | 0.054205669  | 0.055701464 | 0.332195725 |
| pcaac365.smohc222               | -0.006600422 | 0.006783759 | 0.332280902 |
| c51dc.pcaac300                  | -0.047653129 | 0.048978147 | 0.332294495 |
| ornithine.pcaac381              | 0.018033061  | 0.018539405 | 0.332422547 |
| ornithine.pcaac384              | 0.06033753   | 0.062033194 | 0.332433934 |

|                                  |              |             |             |
|----------------------------------|--------------|-------------|-------------|
| pcaec445.c182                    | 0.050353754  | 0.051769443 | 0.3324395   |
| pcaec402.pcaec401                | 0.048918275  | 0.050294767 | 0.332450631 |
| pcaec321.pcaec385                | -0.051135165 | 0.052574207 | 0.332452186 |
| kynurenine.serine                | -0.041337554 | 0.042502886 | 0.332475019 |
| c2.smc261                        | 0.042856182  | 0.044073115 | 0.332571113 |
| c4.pcaec343                      | -0.081093409 | 0.083426351 | 0.332745762 |
| acetylmithoine.pcaec425          | 0.010114635  | 0.010405923 | 0.33275987  |
| pcaac361.pcaec406                | 0.005154981  | 0.005303862 | 0.33279839  |
| pcaec300.pcaec380                | -0.056201466 | 0.057829492 | 0.332838994 |
| asymmetricdimethylarginine.argi  | -0.090180802 | 0.092808905 | 0.332920894 |
| pcaec362.pcaac363                | -0.019976019 | 0.020558513 | 0.33292889  |
| pcaac420.pcaec424                | 0.032848784  | 0.033808607 | 0.332956863 |
| pcaac361.pcaec444                | 0.104205357  | 0.107259512 | 0.332998791 |
| creatinine.asymmetricdimethylar; | -0.019232568 | 0.019800578 | 0.333103962 |
| smc260.pcaac402                  | -0.08797906  | 0.090590131 | 0.333171627 |
| pcaac381.smc181                  | -0.005729135 | 0.005901068 | 0.333326871 |
| c8.pcaec444                      | -0.107606489 | 0.110841122 | 0.333350096 |
| pcaec422.leucine                 | -0.03963332  | 0.040827522 | 0.33338351  |
| pcaec383.pcaac381                | 0.041962834  | 0.043229163 | 0.333405075 |
| pcaac381.smc180                  | -0.00389615  | 0.004013963 | 0.333433546 |
| pcaac405.c12                     | 0.067406462  | 0.06945877  | 0.333531029 |
| smohc221.pcaac380                | 0.060405587  | 0.062254077 | 0.333603282 |
| alanine.smc261                   | 0.021731849  | 0.022397588 | 0.333618677 |
| pcaac383.pcaec424                | 0.004836239  | 0.004984848 | 0.333662635 |
| pcaac343.pcaec445                | 0.072909116  | 0.075152118 | 0.333679493 |
| pcaac365.smohc161                | -0.018697251 | 0.019272956 | 0.333691871 |
| glutamine.c10                    | -0.008250343 | 0.008505052 | 0.333730045 |
| smc181.alanine                   | -0.02117752  | 0.021832839 | 0.33376347  |
| serine.pcaac360                  | -0.040403896 | 0.04165551  | 0.333779124 |
| c14.smc160                       | -0.076852953 | 0.079249917 | 0.333877896 |
| pcaac344.lysopcac204             | -0.019498847 | 0.020107906 | 0.333899707 |
| pcaac380.c5                      | 0.01959434   | 0.020206985 | 0.333914076 |
| pcaac342.smc161                  | -0.082695008 | 0.085285716 | 0.333943064 |
| asparticacid.lysopcac160         | -0.024265658 | 0.025028587 | 0.333995483 |
| pcaac300.pcaec444                | 0.093124114  | 0.096086999 | 0.334170975 |
| pcaac344.c141                    | -0.043376727 | 0.044769499 | 0.334307379 |
| ornithine.pcaec380               | -0.043040704 | 0.044422996 | 0.334310739 |
| pcaec301.pcaac363                | 0.009838826  | 0.010155503 | 0.334343679 |
| pcaec301.pcaac341                | -0.012044968 | 0.012433914 | 0.334392519 |
| pcaec361.c141                    | 0.036729878  | 0.037916708 | 0.33440242  |
| kynurenine.leucine               | 0.033622125  | 0.03471719  | 0.334522506 |
| smc181.smohc141                  | -0.027649331 | 0.028550169 | 0.334527662 |
| isoleucine.putrescine            | -0.036913172 | 0.038122234 | 0.334608547 |

|                                |              |             |             |
|--------------------------------|--------------|-------------|-------------|
| pcaec443.smohc241              | 0.064618473  | 0.066740808 | 0.33465046  |
| pcaec300.pcaac406              | -0.037526245 | 0.038764788 | 0.334725365 |
| pcaec360.pcaec361              | -0.010322032 | 0.010662759 | 0.334727716 |
| pcaac344.pcaec380              | -0.063074123 | 0.065161918 | 0.3347701   |
| pcaac342.pcaac422              | -0.018273997 | 0.018879186 | 0.334777933 |
| pcaac386.pcaec406              | -0.023893588 | 0.024687347 | 0.334826003 |
| phenylalanine.pcaac381         | 0.020799672  | 0.021491467 | 0.33484434  |
| pcaac403.pcaec365              | 0.023796092  | 0.024589748 | 0.334887436 |
| methionine.smc202              | 0.062106147  | 0.06418019  | 0.334907377 |
| pcaac386.ornithine             | 0.019366959  | 0.020013798 | 0.334909247 |
| pcaac424.smc180                | -0.004552794 | 0.004704874 | 0.334911298 |
| pcaec446.pcaec406              | 0.004505392  | 0.004656903 | 0.335016293 |
| glutamicacid.pcaac385          | -0.028441403 | 0.029410327 | 0.335220608 |
| pcaec405.c14                   | -0.061159975 | 0.063246021 | 0.335239546 |
| pcaec421.pcaec404              | 0.058549254  | 0.060548473 | 0.335257201 |
| pcaec362.taurine               | 0.079684333  | 0.082424858 | 0.335371913 |
| pcaec444.pcaac422              | -0.010069041 | 0.010417844 | 0.335487803 |
| pcaec365.leucine               | -0.009309471 | 0.009634277 | 0.33560359  |
| pcaec364.pcaac385              | -0.018927901 | 0.019589054 | 0.335622272 |
| c51dc.asparticacid             | 0.019099927  | 0.019767267 | 0.335626612 |
| smc160.pcaec343                | -0.079806332 | 0.082604981 | 0.335686446 |
| pcaec443.c3                    | -0.053963544 | 0.055856504 | 0.335691335 |
| smohc141.pcaec406              | 0.004570357  | 0.004730822 | 0.335705928 |
| smc161.pcaac420                | -0.074174376 | 0.076799724 | 0.335838244 |
| creatinine.valine              | 0.067453078  | 0.069842347 | 0.335850771 |
| pcaec380.pcaec362              | 0.017917402  | 0.018553368 | 0.335884776 |
| pcaac380.pcaec365              | -0.026780728 | 0.02773686  | 0.335981461 |
| kynurenine.pcaac322            | -0.060595109 | 0.062763229 | 0.336017829 |
| pcaec300.lysopcac161           | 0.061737522  | 0.063961612 | 0.336131501 |
| c16.phenylalanine              | 0.050514501  | 0.052337952 | 0.336165264 |
| c182.pcaec420                  | -0.017718032 | 0.018359459 | 0.336213792 |
| pcaac403.pcaec361              | 0.010890202  | 0.011285005 | 0.336237503 |
| pcaec300.pcaec401              | 0.066295972  | 0.068724001 | 0.336409921 |
| pcaac323.pcaac385              | 0.030680406  | 0.031811975 | 0.336529954 |
| pcaec362.tyrosine              | -0.063359367 | 0.06570514  | 0.336595345 |
| asymmetricdimethylarginine.pca | -0.057620101 | 0.059762042 | 0.336665098 |
| pcaac362.pcaac341              | 0.021154909  | 0.021942082 | 0.336682015 |
| smc160.isoleucine              | 0.02213794   | 0.022964642 | 0.336743893 |
| lysopcac161.lysine             | 0.105778346  | 0.109735615 | 0.336775325 |
| smohc221.pcaec300              | 0.103316252  | 0.107182379 | 0.336779674 |
| alphaaminoadipicacid.pcaac281  | -0.002944409 | 0.003054652 | 0.336789424 |
| alanine.pcaec380               | 0.048418037  | 0.050231638 | 0.336796762 |
| pcaac322.pcaac320              | -0.053235345 | 0.055234598 | 0.336842188 |

|                              |              |             |             |
|------------------------------|--------------|-------------|-------------|
| lysine.pcaec423              | -0.009543032 | 0.009903337 | 0.336935404 |
| alphaaminoadipicacid.c141oh  | -0.113913388 | 0.118218467 | 0.33695243  |
| c51.creatinine               | -0.008483977 | 0.008805074 | 0.336977927 |
| pcaac380.pcaec364            | -0.01884533  | 0.01955919  | 0.336992958 |
| pcaac385.c16                 | 0.035380718  | 0.036725325 | 0.337050504 |
| arginine.spermidine          | 0.069292218  | 0.071927127 | 0.337060753 |
| pcaec343.pcaac240            | -0.013918001 | 0.014455392 | 0.337332146 |
| smohc222.pcaac320            | 0.099353686  | 0.103198205 | 0.337371096 |
| c4.pcaec406                  | -0.011353245 | 0.011792971 | 0.337387789 |
| pcaec363.pcaec301            | -0.050047296 | 0.051985836 | 0.337389115 |
| pcaec406.c142                | -0.066518315 | 0.069095929 | 0.337396667 |
| methionine.pcaac366          | -0.039392495 | 0.040919882 | 0.33740739  |
| creatinine.smc161            | -0.082847239 | 0.086060226 | 0.337411328 |
| pcaec341.lysopcac160         | -0.027814698 | 0.028894197 | 0.337424463 |
| pcaac426.lysopcac182         | -0.017658411 | 0.018346047 | 0.337484972 |
| lysopcac204.h1               | 0.002765362  | 0.002873125 | 0.337497914 |
| alphaaminoadipicacid.lysine  | -0.096876354 | 0.100652705 | 0.337503597 |
| lysopcac281.pcaec383         | -0.058889824 | 0.06118664  | 0.337513218 |
| pcaac281.transhydroxyproline | 0.035120961  | 0.036491653 | 0.3375252   |
| pcaec385.pcaec360            | -0.004465519 | 0.004640446 | 0.337592434 |
| pcaec420.pcaac406            | -0.071243734 | 0.074037158 | 0.337609364 |
| pcaec402.lysopcac280         | -0.016672204 | 0.017328758 | 0.337688473 |
| pcaec406.pcaac420            | -0.105783835 | 0.109953731 | 0.33770648  |
| smohc221.c14                 | -0.032212281 | 0.033483952 | 0.337733724 |
| pcaac402.pcaec404            | 0.052147991  | 0.054209362 | 0.337757527 |
| smc202.c18                   | -0.027235642 | 0.028318284 | 0.3378602   |
| pcaac380.pcaec404            | -0.011903611 | 0.012377245 | 0.337877872 |
| lysopcac181.pcaec422         | 0.046803925  | 0.048666258 | 0.337878338 |
| pcaec406.tyrosine            | -0.068597537 | 0.071329325 | 0.33789376  |
| pcaec404.pcaec300            | -0.046838677 | 0.048704816 | 0.337902289 |
| smc181.pcaac281              | 0.001824113  | 0.001897254 | 0.33802031  |
| acetylmithoine.lysine        | 0.103145022  | 0.10729873  | 0.338100758 |
| smohc222.lysopcac204         | -0.03319121  | 0.034530871 | 0.338143025 |
| pcaec322.lysopcac160         | -0.017823297 | 0.018543042 | 0.338152443 |
| pcaac424.smohc241            | 0.063135456  | 0.06569324  | 0.338212782 |
| smc260.pcaec383              | -0.050455076 | 0.052506703 | 0.338282091 |
| pcaac406.prolinr             | 0.028840301  | 0.030015398 | 0.338320252 |
| creatinine.pcaac240          | 0.017251187  | 0.017957866 | 0.338421608 |
| pcaec401.smc180              | -0.006384933 | 0.006647697 | 0.338509367 |
| pcaec402.pcaec384            | -0.06635151  | 0.069121535 | 0.338783893 |
| pcaac281.smc240              | -0.045822251 | 0.04774173  | 0.338849475 |
| smc261.ornithine             | 0.031539703  | 0.032861825 | 0.338863162 |
| pcaac385.pcaac281            | 0.002049775  | 0.002135944 | 0.338918007 |

|                              |              |             |             |
|------------------------------|--------------|-------------|-------------|
| ornithine.pcaec301           | -0.103335159 | 0.107702022 | 0.339020192 |
| smohc221.c16                 | 0.034498688  | 0.035958712 | 0.3390488   |
| pcaec300.pcaac320            | 0.104312402  | 0.108731506 | 0.339068648 |
| smc240.pcaac406              | -0.071666929 | 0.07470674  | 0.33909251  |
| pcaac406.glutamicacid        | 0.03710957   | 0.038684361 | 0.339101949 |
| pcaec424.smc180              | -0.005627902 | 0.005867886 | 0.339196817 |
| lysopcac281.pcaec403         | -0.01248228  | 0.013015177 | 0.339220175 |
| methionine.pcaec421          | 0.00462659   | 0.004824272 | 0.3392364   |
| pcaac385.smc241              | 0.072282482  | 0.075374963 | 0.339262171 |
| h1.methioninesulfoxide       | 0.045983851  | 0.047953546 | 0.339285817 |
| lysopcac280.pcaec422         | -0.027536498 | 0.028717167 | 0.339305219 |
| prolinr.pcaac380             | -0.055374554 | 0.057749277 | 0.339309003 |
| pcaac365.lysopcac181         | 0.031379412  | 0.032726166 | 0.339324529 |
| pcaac323.lysopcac180         | -0.042268485 | 0.044087408 | 0.339377258 |
| acetylornithoine.smohc241    | -0.075751504 | 0.079014086 | 0.339394293 |
| pcaec361.phenylalanine       | 0.055200788  | 0.057606056 | 0.339626602 |
| asparticacid.pcaec425        | -0.006838723 | 0.007137615 | 0.339687804 |
| pcaac362.pcaec301            | 0.079474128  | 0.082961781 | 0.339770053 |
| pcaec445.smohc141            | -0.021212743 | 0.022147552 | 0.339854934 |
| smc240.isoleucine            | 0.020808883  | 0.021727487 | 0.339890231 |
| pcaac402.kynurenine          | 0.018655934  | 0.019480367 | 0.339911739 |
| smc180.smc240                | 0.029760651  | 0.031075976 | 0.339914198 |
| acetylornithoine.valine      | -0.010069399 | 0.010514493 | 0.339916885 |
| asparagine.c14               | 0.061780893  | 0.064518667 | 0.339968329 |
| smc241.kynurenine            | -0.004751894 | 0.004962993 | 0.340018966 |
| pcaec423.pcaec300            | 0.037737074  | 0.039414185 | 0.340027215 |
| smc241.serine                | -0.027311672 | 0.028526084 | 0.340037789 |
| pcaec445.pcaec443            | -0.042691869 | 0.044592489 | 0.340062912 |
| glutamine.c8                 | -0.043923964 | 0.045888723 | 0.340160324 |
| lysopcac181.pcaac322         | -0.098478354 | 0.102901708 | 0.340246047 |
| pcaac426.lysopcac204         | -0.028931869 | 0.03023298  | 0.340271153 |
| pcaac422.pcaac240            | -0.023474884 | 0.024531451 | 0.340288154 |
| smc180.serine                | -0.022559205 | 0.023576048 | 0.340318521 |
| pcaec425.c182                | -0.033582393 | 0.035096834 | 0.340328602 |
| lysopcac140.glutamicacid     | 0.037757108  | 0.039461681 | 0.340351391 |
| c5.tyrosine                  | 0.11756271   | 0.122871317 | 0.340355895 |
| asparagine.tyrosine          | -0.041243327 | 0.0431149   | 0.340458685 |
| pcaec402.transhydroxyproline | 0.033683256  | 0.035214401 | 0.340494758 |
| pcaec445.lysopcac160         | -0.007896978 | 0.008256492 | 0.340526238 |
| lysopcac170.phenylalanine    | 0.054898535  | 0.057397926 | 0.340527133 |
| c142.pcaec300                | 0.035976212  | 0.037614272 | 0.340529102 |
| pcaec301.taurine             | -0.027770574 | 0.029036594 | 0.340555242 |
| smohc241.c181                | -0.014742569 | 0.01541474  | 0.340557708 |

|                                 |              |             |             |
|---------------------------------|--------------|-------------|-------------|
| pcaec343.lysopcac161            | 0.10161939   | 0.106253856 | 0.340563332 |
| c3.lysopcac180                  | 0.050559109  | 0.052885116 | 0.340747198 |
| methioninesulfoxide.pcaec444    | -0.114966442 | 0.120261074 | 0.340769298 |
| asymmetricdimethylarginine.pca  | -0.034531446 | 0.036124607 | 0.340807397 |
| pcaac426.pcaac323               | 0.077475882  | 0.081053649 | 0.340826984 |
| pcaec341.pcaec406               | 0.005172173  | 0.005411364 | 0.340857645 |
| smohc141.c51dc                  | -0.121673668 | 0.127301505 | 0.340861213 |
| phenylalanine.lysopcac160       | -0.071690615 | 0.075006711 | 0.340862188 |
| c12.pcaac405                    | 0.069645784  | 0.072870686 | 0.34088458  |
| alphaaminoadipicacid.smc181     | -0.033570258 | 0.035126157 | 0.340904456 |
| c101.pcaec425                   | 0.009274413  | 0.009704376 | 0.34091025  |
| creatinine.pcaec383             | 0.072119095  | 0.075475566 | 0.340993265 |
| pcaac342.smohc141               | 0.019025887  | 0.019912523 | 0.341021246 |
| c8.pcaac405                     | -0.074641584 | 0.07812106  | 0.341027803 |
| c162.c5                         | -0.006507917 | 0.006811891 | 0.341070362 |
| c8.pcaec380                     | 0.080768114  | 0.084543325 | 0.341085533 |
| pcaac406.c2                     | 0.070744123  | 0.074059759 | 0.341143759 |
| c182.pcaac363                   | 0.009484666  | 0.009929297 | 0.341148741 |
| pcaec340.pcaec342               | -0.156430861 | 0.163791133 | 0.341227992 |
| serine.lysopcac181              | 0.033053173  | 0.034612222 | 0.341281583 |
| pcaac364.serine                 | -0.043325936 | 0.045377354 | 0.341364563 |
| alanine.pcaec361                | 0.009631831  | 0.010089894 | 0.341460462 |
| smc202.kynurenine               | -0.004399148 | 0.00460878  | 0.341504426 |
| kynurenine.smc180               | 0.013846792  | 0.014506805 | 0.341510124 |
| pcaec422.pcaec406               | 0.00861592   | 0.009028942 | 0.34163489  |
| pcaac344.glycine                | 0.034959798  | 0.03663639  | 0.341644373 |
| smohc161.pcaec363               | -0.04818699  | 0.050501537 | 0.34167876  |
| c102.taurine                    | -0.018689715 | 0.019589199 | 0.341722208 |
| alanine.asymmetricdimethylargir | 0.015071638  | 0.01579753  | 0.341738533 |
| pcaac365.smohc141               | -0.022942796 | 0.024048062 | 0.341744058 |
| pcaec340.glutamicacid           | 0.042494133  | 0.044543266 | 0.341765491 |
| leucine.pcaac300                | -0.041730799 | 0.043748903 | 0.341829067 |
| pcaac361.asymmetricdimethylar;  | 0.024505931  | 0.025691551 | 0.341838662 |
| pcaac360.pcaec322               | -0.128167151 | 0.134385138 | 0.341900018 |
| lysopcac181.smc202              | -0.048996388 | 0.051394879 | 0.34210084  |
| pcaec404.pcaac384               | 0.048489053  | 0.050869201 | 0.342162249 |
| smohc221.pcaec360               | -0.007718166 | 0.008097516 | 0.342191623 |
| pcaec340.pcaec380               | -0.049137118 | 0.051553946 | 0.342207685 |
| smc161.pcaec406                 | 0.009551984  | 0.010022275 | 0.342230363 |
| pcaac344.c18                    | 0.048153512  | 0.050524418 | 0.34223109  |
| glutamicacid.creatinine         | -0.01289832  | 0.013535773 | 0.342315898 |
| kynurenine.acetylnithoine       | -0.062345831 | 0.06543012  | 0.342338481 |
| smc202.pcaec360                 | -0.004751494 | 0.0049866   | 0.342342962 |



|                                |              |             |             |
|--------------------------------|--------------|-------------|-------------|
| pcaec382.pcaac406              | -0.100851968 | 0.105853094 | 0.342392626 |
| pcaec425.pcaac385              | -0.046408909 | 0.048719065 | 0.342479481 |
| smohc141.pcaec382              | -0.018331215 | 0.019255708 | 0.342779286 |
| pcaec300.pcaac364              | -0.057971185 | 0.060911212 | 0.342908692 |
| pcaec386.glycine               | 0.05112043   | 0.053724934 | 0.343015394 |
| pcaac281.serine                | -0.012228786 | 0.012852028 | 0.343023077 |
| pcaec385.asymmetricdimethylar; | 0.03816384   | 0.040111964 | 0.343060226 |
| pcaac380.methioninesulfoxide   | 0.020604114  | 0.021656218 | 0.343067759 |
| pcaac365.pcaac300              | -0.070913683 | 0.074537505 | 0.34308563  |
| c10.c101                       | 0.022136876  | 0.023268846 | 0.3431008   |
| smc261.pcaac381                | -0.045313706 | 0.047635013 | 0.343143108 |
| glutamicacid.lysopcac161       | 0.070281467  | 0.073885018 | 0.343164001 |
| smohc241.pcaac422              | -0.022657866 | 0.023822942 | 0.343231375 |
| pcaec425.pcaac365              | -0.051056934 | 0.053690249 | 0.343302584 |
| pcaac364.pcaec322              | 0.069150319  | 0.072722073 | 0.343337336 |
| kynurenine.pcaac300            | -0.043546252 | 0.045819602 | 0.343590369 |
| pcaec361.pcaac406              | -0.039774618 | 0.041859298 | 0.343684947 |
| prolinr.smohc241               | 0.035555405  | 0.037422368 | 0.343728928 |
| citruline.pcaac240             | -0.026368415 | 0.027754448 | 0.343754338 |
| pcaec342.lysopcac161           | 0.098241407  | 0.103405482 | 0.343754789 |
| prolinr.lysine                 | -0.070940402 | 0.074674815 | 0.343789694 |
| pcaac323.pcaac422              | -0.025662441 | 0.027016338 | 0.343842864 |
| pcaec364.pcaec383              | 0.047837003  | 0.050365127 | 0.343884339 |
| serotonin.c5                   | -0.017929222 | 0.018880604 | 0.343982302 |
| c5.pcaec406                    | -0.011013575 | 0.011598388 | 0.343998793 |
| smc160.pcaec421                | 0.002620753  | 0.002759998 | 0.344013619 |
| c0.pcaec446                    | 0.088339639  | 0.093033454 | 0.344014522 |
| pcaec386.c102                  | 0.027937425  | 0.029426961 | 0.344098148 |
| lysopcac161.pcaec404           | -0.038101748 | 0.040133305 | 0.344099234 |
| pcaec380.smohc141              | -0.023093491 | 0.024326915 | 0.344140683 |
| lysopcac140.pcaec443           | -0.079830419 | 0.084097266 | 0.344158422 |
| pcaac362.glycine               | -0.036218393 | 0.038157718 | 0.34420244  |
| pcaec360.pcaac420              | -0.140111999 | 0.147621484 | 0.344225715 |
| glutamine.pcaec406             | 0.003289574  | 0.003466968 | 0.344376326 |
| pcaec446.lysopcac160           | -0.008443891 | 0.008899323 | 0.344380839 |
| serine.pcaac341                | 0.00330691   | 0.003485275 | 0.344381286 |
| smc240.pcaec421                | -0.002156436 | 0.002272943 | 0.344422409 |
| pcaec322.pcaec363              | -0.04001879  | 0.042192732 | 0.344557311 |
| pcaec420.pcaac403              | -0.009489318 | 0.010005145 | 0.344573559 |
| pcaec420.pcaec363              | 0.026751113  | 0.028205605 | 0.344579322 |
| pcaac401.c182                  | -0.04029244  | 0.042488181 | 0.344635787 |
| c2.pcaec424                    | -0.017644018 | 0.018606038 | 0.344648893 |
| c142.pcaac385                  | 0.008168944  | 0.008615738 | 0.344726558 |

|                                |              |             |             |
|--------------------------------|--------------|-------------|-------------|
| pcaac322.c102                  | 0.046283633  | 0.048818514 | 0.344760411 |
| pcaac362.lysopcac203           | -0.022897792 | 0.02415355  | 0.344793908 |
| glutamicacid.pcaec321          | 0.022928206  | 0.024186012 | 0.344801465 |
| pcaec421.pcaec403              | -0.090283591 | 0.095245436 | 0.34484703  |
| pcaec403.pcaec444              | -0.147282443 | 0.15537782  | 0.344850012 |
| pcaac281.putrescine            | -0.024222242 | 0.025555214 | 0.344880052 |
| serine.pcaec365                | 0.032493027  | 0.034284811 | 0.344931452 |
| c51dc.lysopcac170              | 0.009587842  | 0.010117071 | 0.344956183 |
| pcaac401.smc180                | -0.003566843 | 0.003765013 | 0.345120667 |
| creatinine.pcaec361            | 0.011701145  | 0.012351483 | 0.345129811 |
| lysopcac140.pcaac364           | -0.064199086 | 0.067768407 | 0.345138307 |
| glutamine.pcaac385             | 0.010359631  | 0.010936452 | 0.34517564  |
| pcaec300.pcaec425              | 0.008255827  | 0.008716771 | 0.345245273 |
| lysopcac181.alphaaminoadipicac | 0.011992859  | 0.012667906 | 0.345452349 |
| lysopcac280.pcaec363           | -0.023061433 | 0.024360717 | 0.345476373 |
| pcaec343.c51                   | 0.060921419  | 0.064362252 | 0.345539948 |
| c142.pcaec361                  | -0.012597397 | 0.013308934 | 0.345541322 |
| pcaac406.pcaac422              | -0.042634775 | 0.045047598 | 0.34559137  |
| c142.pcaec363                  | -0.011609634 | 0.012267465 | 0.345623082 |
| pcaec446.pcaac425              | 0.085844872  | 0.090709223 | 0.345623944 |
| pcaec343.serine                | -0.016671338 | 0.017616605 | 0.345640199 |
| pcaec445.pcaac300              | 0.045170182  | 0.047732207 | 0.345648951 |
| lysopcac281.pcaac322           | -0.035289704 | 0.037296232 | 0.345712332 |
| c181.pcaec420                  | -0.01773679  | 0.018747245 | 0.345762716 |
| smohc221.serine                | -0.022727199 | 0.02402338  | 0.345791227 |
| pcaec386.pcaec425              | 0.006381397  | 0.006745369 | 0.345793212 |
| c162.kynurenine                | -0.006047687 | 0.006392876 | 0.345812034 |
| c101.pcaec343                  | -0.071801253 | 0.075901287 | 0.345823241 |
| putrescine.lysopcac170         | -0.015135526 | 0.016000897 | 0.345856114 |
| h1.tyrosine                    | 0.08041125   | 0.08501738  | 0.345904916 |
| methioninesulfoxide.pcaac344   | -0.083075773 | 0.08785576  | 0.346021084 |
| pcaec362.kynurenine            | -0.007130999 | 0.007541683 | 0.346045491 |
| c141oh.serine                  | 0.028442055  | 0.030084315 | 0.346113286 |
| pcaec386.pcaec444              | 0.120132913  | 0.127079302 | 0.346150556 |
| pcaac281.pcaec404              | -0.015540914 | 0.016441358 | 0.346204031 |
| pcaac343.alphaaminoadipicacid  | -0.011230092 | 0.011882278 | 0.346265194 |
| pcaac422.lysine                | 0.088437834  | 0.09358827  | 0.346339292 |
| serotonin.smc181               | 0.027337431  | 0.028929582 | 0.346340558 |
| pcaac402.lysopcac170           | -0.043034208 | 0.045549036 | 0.346430107 |
| pcaac383.pcaec421              | -0.047014457 | 0.049762451 | 0.346435605 |
| pcaec383.acetylornithoine      | 0.075328317  | 0.079734466 | 0.346454957 |
| pcaec321.c142                  | 0.049051816  | 0.051927911 | 0.346519083 |
| pcaac383.pcaec365              | -0.035401232 | 0.037483128 | 0.346598424 |

|                               |              |             |             |
|-------------------------------|--------------|-------------|-------------|
| pcaac364.lysopcac204          | -0.014871411 | 0.01574644  | 0.346612567 |
| pcaec322.pcaac380             | 0.07258292   | 0.076860837 | 0.34665734  |
| c182.phenylalanine            | 0.036655305  | 0.038816086 | 0.346662016 |
| pcaac385.serotonin            | -0.122254533 | 0.129473285 | 0.346706613 |
| smohc222.creatinine           | -0.006256713 | 0.006626554 | 0.346735689 |
| smohc241.smc260               | 0.080361373  | 0.085118993 | 0.346777372 |
| smohc241.asymmetricdimethyla  | 0.024833028  | 0.026306504 | 0.346837495 |
| smc181.smohc222               | -0.007678091 | 0.00813421  | 0.346869236 |
| c51.prolinr                   | 0.034118095  | 0.036148414 | 0.346916085 |
| pcaac281.pcaac422             | -0.013358752 | 0.014155023 | 0.346960592 |
| pcaac323.pcaac380             | 0.041643041  | 0.044128705 | 0.346998295 |
| c51.smohc221                  | 0.053010184  | 0.056189523 | 0.347128093 |
| c141oh.pcaac381               | -0.011069213 | 0.011733631 | 0.347149863 |
| pcaac405.pcaac341             | -0.006226954 | 0.006600723 | 0.347150042 |
| c51dc.histidine               | 0.084331543  | 0.089399925 | 0.347184616 |
| pcaec360.lysopcac181          | 0.031323628  | 0.033211203 | 0.34725705  |
| alphaaminoadipicacid.pcaac341 | 0.004889628  | 0.005184867 | 0.347311513 |
| c18.pcaec363                  | -0.017531431 | 0.018591568 | 0.347352314 |
| pcaec420.pcaac386             | 0.017847997  | 0.018928007 | 0.347370853 |
| pcaac401.pcaac406             | 0.056104021  | 0.05950633  | 0.347430374 |
| pcaec446.pcaac422             | -0.017043083 | 0.018077135 | 0.347443931 |
| pcaec420.pcaac385             | -0.052548253 | 0.055739216 | 0.347467317 |
| pcaac385.c181                 | -0.01067123  | 0.011319937 | 0.347497175 |
| pcaac363.pcaac425             | 0.005612905  | 0.00595513  | 0.347579087 |
| c181.pcaac381                 | -0.008764366 | 0.009300273 | 0.34765835  |
| pcaac383.lysopcac182          | -0.017418923 | 0.018485282 | 0.347691076 |
| kynurenine.pcaac323           | 0.143736115  | 0.152549256 | 0.34773468  |
| c182.smc160                   | -0.066207749 | 0.070271728 | 0.347765243 |
| lysopcac161.pcaec424          | 0.012194567  | 0.012943127 | 0.347766371 |
| lysopcac180.smc180            | -0.00909616  | 0.009655192 | 0.34779955  |
| pcaac384.pcaec322             | 0.074776145  | 0.079377973 | 0.347837302 |
| c181.pcaec443                 | 0.0775608    | 0.082352036 | 0.347942558 |
| pcaac361.pcaec322             | 0.066988376  | 0.071126923 | 0.347945338 |
| citruline.pcaac386            | 0.024599119  | 0.026120248 | 0.34797096  |
| pcaec341.c102                 | 0.025955268  | 0.027560511 | 0.347975405 |
| lysine.lysopcac181            | 0.039316307  | 0.04175051  | 0.348005633 |
| smc260.glutamine              | -0.028542696 | 0.030321908 | 0.348196452 |
| c181.pcaec425                 | 0.006955089  | 0.007389134 | 0.348228875 |
| pcaac405.pcaec421             | 0.001098093  | 0.001166733 | 0.348274825 |
| ornithine.pcaec402            | -0.032659834 | 0.034703418 | 0.348303497 |
| smc202.smohc141               | -0.03273324  | 0.034791746 | 0.348446144 |
| pcaec406.pcaac385             | -0.058391749 | 0.062064209 | 0.348448937 |
| pcaac281.lysopcac181          | 0.036979861  | 0.039306358 | 0.348457556 |

|                                 |              |             |             |
|---------------------------------|--------------|-------------|-------------|
| lysopcac281.pcaac380            | 0.02556705   | 0.027176774 | 0.348479397 |
| pcaac344.smc161                 | -0.050077864 | 0.05323838  | 0.348547723 |
| pcaac361.smc241                 | -0.053492095 | 0.056875093 | 0.348606876 |
| pcaac421.c182                   | -0.036635389 | 0.038962756 | 0.348735595 |
| c51dc.alanine                   | 0.013749231  | 0.014623419 | 0.348759567 |
| asparagine.smohc221             | -0.060755588 | 0.064644164 | 0.348950455 |
| leucine.phenylalanine           | 0.103726999  | 0.110367792 | 0.348958697 |
| leucine.c162                    | 0.100494562  | 0.106928641 | 0.348959739 |
| pcaec445.c16                    | 0.053295163  | 0.056709607 | 0.348978935 |
| lysopcac204.pcaec342            | 0.07523583   | 0.080056877 | 0.348984569 |
| asparticacid.ornithine          | -0.038833728 | 0.041322946 | 0.348993708 |
| pcaec380.pcaac361               | 0.041279379  | 0.043933893 | 0.349087013 |
| smc240.pcaec364                 | -0.021764474 | 0.023165405 | 0.349114862 |
| pcaac386.pcaec425               | 0.00432167   | 0.004599969 | 0.349127627 |
| isoleucine.c141oh               | -0.147307198 | 0.156802286 | 0.349155464 |
| pcaac383.pcaac426               | 0.052225192  | 0.055591656 | 0.349156724 |
| asymmetricdimethylarginine.leuc | 0.007101696  | 0.007559501 | 0.349158406 |
| pcaec421.serotonin              | -0.12193196  | 0.129797791 | 0.349179048 |
| pcaac405.pcaac420               | -0.053139318 | 0.05658674  | 0.349343808 |
| pcaac341.pcaac405               | -0.048406316 | 0.05154838  | 0.349359616 |
| lysopcac181.isoleucine          | 0.054259051  | 0.057785488 | 0.349396783 |
| alanine.pcaac321                | -0.039180608 | 0.041727466 | 0.349401482 |
| pcaec381.pcaec401               | 0.063956791  | 0.068119235 | 0.349437164 |
| pcaec406.pcaac386               | 0.027728551  | 0.029534265 | 0.349454733 |
| pcaec384.c14                    | -0.043322343 | 0.046144827 | 0.349468114 |
| c10.pcaec362                    | 0.02166865   | 0.023081281 | 0.349486886 |
| c101.pcaec362                   | -0.011195569 | 0.011925655 | 0.349495749 |
| pcaac240.lysopcac180            | -0.069777349 | 0.074342028 | 0.349588509 |
| pcaac365.pcaec422               | -0.031155723 | 0.033194355 | 0.349595662 |
| smc261.pcaac361                 | 0.062673544  | 0.066780753 | 0.349640631 |
| asparagine.lysopcac170          | -0.018032406 | 0.019219267 | 0.349769026 |
| pcaac363.pcaac360               | 0.025265027  | 0.026928091 | 0.349771952 |
| c101.pcaec363                   | -0.014175804 | 0.015109271 | 0.349783023 |
| smohc241.serine                 | -0.020449822 | 0.021796484 | 0.349784234 |
| smc260.pcaec364                 | 0.017434091  | 0.018583776 | 0.349826006 |
| pcaac406.pcaec425               | 0.005086543  | 0.005423125 | 0.349928066 |
| pcaec444.pcaac381               | 0.017414809  | 0.0185674   | 0.349934068 |
| pcaec443.c181                   | 0.028101462  | 0.029965268 | 0.349996955 |
| smc260.pcaac384                 | 0.100775997  | 0.107475385 | 0.350066253 |
| smohc141.pcaec425               | 0.016215605  | 0.017293697 | 0.35006934  |
| c8.c101                         | 0.02527081   | 0.026951804 | 0.350084807 |
| pcaec421.methionine             | -0.048910547 | 0.052165499 | 0.350098251 |
| pcaec365.c141oh                 | -0.101856507 | 0.108638727 | 0.35011489  |

|                                |              |             |             |
|--------------------------------|--------------|-------------|-------------|
| pcaac425.pcaac322              | 0.077830561  | 0.083029883 | 0.350212622 |
| kynurenine.smc260              | 0.023661106  | 0.025243383 | 0.35024387  |
| pcaec342.putrescine            | -0.031723172 | 0.033845665 | 0.350259268 |
| pcaec342.pcaac383              | 0.016521741  | 0.017628254 | 0.350289173 |
| pcaec405.smc180                | -0.006490241 | 0.006925014 | 0.350296132 |
| glutamicacid.pcaec401          | 0.078694617  | 0.0839694   | 0.350314094 |
| pcaec443.glutamicacid          | 0.082948866  | 0.088510195 | 0.350321632 |
| lysopcac170.serotonin          | -0.112173096 | 0.119698245 | 0.350339583 |
| smohc222.smc161                | 0.131225526  | 0.140123248 | 0.350663347 |
| pcaec300.c101                  | -0.009531476 | 0.01017832  | 0.350689967 |
| lysopcac170.pcaec423           | 0.018390137  | 0.019641793 | 0.350778664 |
| pcaac300.alanine               | -0.02633832  | 0.028131399 | 0.350786519 |
| alphaaminoadipicacid.pcaac383  | -0.012034447 | 0.012854492 | 0.350814749 |
| pcaac401.methionine            | -0.060026589 | 0.06412064  | 0.350842817 |
| pcaac426.transhydroxyproline   | 0.027596181  | 0.029491272 | 0.351053257 |
| c101.methioninesulfoxide       | 0.026570511  | 0.028397678 | 0.351095726 |
| pcaac344.pcaec425              | 0.009905034  | 0.010587131 | 0.351139302 |
| asymmetricdimethylarginine.pca | 0.006760996  | 0.007229143 | 0.351309317 |
| pcaec404.lysopcac181           | -0.068950085 | 0.073731999 | 0.351359153 |
| glycine.smohc141               | 0.019976174  | 0.021361814 | 0.351364266 |
| pcaec406.pcaac320              | 0.11159797   | 0.119369005 | 0.351485265 |
| pcaec386.pcaac366              | -0.042605335 | 0.045573392 | 0.351498642 |
| pcaac281.lysopcac160           | -0.014038158 | 0.015016434 | 0.351508934 |
| pcaac342.c18                   | 0.035025319  | 0.037468442 | 0.351538616 |
| leucine.c12                    | -0.036342012 | 0.038879051 | 0.351564202 |
| spermidine.c14                 | 0.19529407   | 0.208942794 | 0.351599201 |
| pcaec420.c141oh                | -0.101498863 | 0.108606108 | 0.351659701 |
| lysopcac182.glycine            | -0.022934847 | 0.024544649 | 0.351734769 |
| pcaec425.pcaec404              | -0.021925922 | 0.023466013 | 0.351757377 |
| pcaac362.serine                | -0.013365189 | 0.014304617 | 0.351779133 |
| pcaec381.pcaec421              | -0.010547557 | 0.011290204 | 0.351833096 |
| smohc141.pcaec424              | 0.013995222  | 0.014981246 | 0.351853217 |
| lysopcac281.glycine            | -0.054314822 | 0.058144594 | 0.351878476 |
| c18.c16                        | -0.062024637 | 0.06640335  | 0.35191691  |
| pcaec364.smc161                | -0.051344229 | 0.05497076  | 0.351932775 |
| smohc222.glutamine             | -0.013987578 | 0.014976015 | 0.351947865 |
| smc261.smc241                  | -0.118735337 | 0.127131531 | 0.351969447 |
| c18.pcaac381                   | -0.011064192 | 0.011847295 | 0.351998418 |
| pcaac343.pcaac321              | -0.034870952 | 0.037345168 | 0.352077031 |
| alanine.pcaec424               | 0.018305295  | 0.019604897 | 0.352096075 |
| lysopcac160.pcaec406           | 0.016660236  | 0.017851281 | 0.352317566 |
| pcaac422.c2                    | 0.071920931  | 0.077063102 | 0.352320821 |
| pcaec342.c51                   | 0.060174213  | 0.064477373 | 0.352327157 |

|                                 |              |             |             |
|---------------------------------|--------------|-------------|-------------|
| smc160.pcaac363                 | -0.006801537 | 0.00728834  | 0.352354384 |
| pcaac343.lysopcac204            | -0.02104059  | 0.02254708  | 0.352366371 |
| pcaec420.pcaec340               | -0.044557863 | 0.047753987 | 0.352424816 |
| pcaac344.pcaac426               | 0.090612775  | 0.09711417  | 0.352433541 |
| lysopcac181.pcaac422            | -0.044837145 | 0.048063479 | 0.352526462 |
| pcaac403.smc181                 | -0.004842707 | 0.005191815 | 0.352585878 |
| pcaac364.c51                    | 0.034889749  | 0.037406755 | 0.352609286 |
| lysopcac203.pcaec341            | 0.052824311  | 0.056636365 | 0.352619604 |
| lysopcac182.c102                | -0.038845582 | 0.041651245 | 0.352647051 |
| arginine.pcaec342               | 0.088682198  | 0.095092436 | 0.352672646 |
| lysopcac203.pcaac403            | -0.007589327 | 0.008138832 | 0.352727097 |
| pcaec300.pcaac425               | 0.101661842  | 0.109025142 | 0.35273803  |
| pcaec341.c182                   | -0.039682516 | 0.042559477 | 0.352769413 |
| pcaec364.h1                     | 0.002363793  | 0.002535182 | 0.352772378 |
| asymmetricdimethylarginine.lysi | 0.088284524  | 0.094697718 | 0.352833341 |
| c51.pcaec403                    | -0.04510233  | 0.048380449 | 0.352851004 |
| lysopcac161.kynurenine          | -0.008876637 | 0.009521905 | 0.352855942 |
| asparticacid.pcaac364           | -0.069446265 | 0.074501694 | 0.352902211 |
| smc202.c14                      | -0.01859344  | 0.019947729 | 0.352920393 |
| pcaac401.smohc241               | 0.066199106  | 0.071023457 | 0.352938048 |
| smc261.c51                      | 0.044517959  | 0.047772544 | 0.353041314 |
| pcaec422.smc180                 | -0.005664951 | 0.006079609 | 0.353081519 |
| methionine.c10                  | -0.006302171 | 0.006763727 | 0.353099617 |
| c141.lysopcac181                | 0.040102024  | 0.043042131 | 0.353134508 |
| pcaec341.smc180                 | -0.019896878 | 0.021358676 | 0.353202927 |
| smc241.pcaec445                 | -0.059951318 | 0.064360008 | 0.353233831 |
| pcaac406.c10                    | -0.003268028 | 0.003509141 | 0.353341761 |
| smohc141.lysopcac182            | -0.02747433  | 0.029502657 | 0.353362729 |
| smc260.pcaac323                 | 0.074837245  | 0.080363101 | 0.353368132 |
| pcaec443.smc180                 | -0.005834901 | 0.00626731  | 0.353488299 |
| c5.pcaec421                     | 0.001831587  | 0.001967413 | 0.353510869 |
| smohc221.pcaac240               | -0.009570136 | 0.010279903 | 0.353513987 |
| pcaac360.c10                    | -0.003277467 | 0.003520569 | 0.353518028 |
| pcaac366.pcaec424               | 0.007913423  | 0.008500551 | 0.353526984 |
| pcaac363.pcaac364               | -0.094938327 | 0.101982425 | 0.353528191 |
| pcaac386.c162                   | -0.054510409 | 0.058555547 | 0.353533546 |
| pcaec425.c51                    | 0.091231351  | 0.098003848 | 0.353545052 |
| spermidine.c10                  | -0.025465109 | 0.027357376 | 0.353578064 |
| methionine.c2                   | 0.063364216  | 0.068085734 | 0.353669942 |
| pcaac300.pcaec380               | -0.053257248 | 0.057232252 | 0.353725252 |
| lysine.pcaec363                 | 0.031674432  | 0.034043329 | 0.353792721 |
| smc181.pcaec423                 | -0.012809186 | 0.013769143 | 0.353861442 |
| methionine.smc180               | 0.007497801  | 0.008059808 | 0.353867432 |

|                                 |              |             |             |
|---------------------------------|--------------|-------------|-------------|
| h1.pcaec364                     | 0.01949299   | 0.020954657 | 0.353879908 |
| pcaac341.c2                     | -0.072968895 | 0.07845097  | 0.353944471 |
| lysine.pcaac240                 | -0.013994683 | 0.01504697  | 0.3539726   |
| histidine.tyrosine              | -0.070343546 | 0.075638025 | 0.354005648 |
| serine.pcaac365                 | -0.04635191  | 0.049846647 | 0.354063525 |
| pcaec342.valine                 | -0.046368796 | 0.04986644  | 0.35407925  |
| smc260.creatinine               | 0.010061203  | 0.01082098  | 0.354116936 |
| pcaec341.spermidine             | -0.065314335 | 0.070254093 | 0.354168262 |
| pcaec363.c3                     | -0.043548706 | 0.046847264 | 0.354218918 |
| pcaac425.pcaac321               | 0.016632772  | 0.017893704 | 0.354248339 |
| pcaac426.pcaac361               | 0.019091702  | 0.020539164 | 0.354251108 |
| pcaac386.acetylmethionine       | -0.03097003  | 0.033318805 | 0.354261798 |
| pcaec425.lysopcaac160           | -0.027951977 | 0.03007192  | 0.354262722 |
| smc161.glycine                  | -0.054769354 | 0.05892351  | 0.354265329 |
| pcaec360.c14                    | 0.080013083  | 0.086088249 | 0.354300543 |
| c5.c101                         | 0.023341569  | 0.025116897 | 0.35435916  |
| methioninesulfoxide.pcaec423    | 0.03917821   | 0.042166    | 0.354449612 |
| acetylmethionine.pcaac363       | 0.009839208  | 0.010590499 | 0.354492113 |
| pcaac406.pcaec422               | -0.020628202 | 0.022206213 | 0.354554875 |
| c18.pcaac426                    | 0.053356031  | 0.057456758 | 0.354714467 |
| pcaec364.smc202                 | 0.051570737  | 0.055544481 | 0.354802798 |
| lysopcaac160.pcaac380           | 0.101882742  | 0.109737568 | 0.354821715 |
| alphaaminoadipicacid.putrescine | -0.0248788   | 0.026797113 | 0.354826002 |
| c10.pcaac405                    | -0.059885986 | 0.064516597 | 0.354922823 |
| lysopcaac181.smc180             | -0.014298976 | 0.015405251 | 0.354942261 |
| pcaec342.smohc241               | -0.036463957 | 0.039289496 | 0.354996168 |
| pcaec406.smohc141               | -0.018882892 | 0.020346417 | 0.355003648 |
| smc261.lysine                   | 0.077396024  | 0.08340787  | 0.355079795 |
| phenylalanine.c51dc             | 0.122533833  | 0.132065763 | 0.355130431 |
| smc261.pcaec423                 | 0.033265325  | 0.035853258 | 0.355133326 |
| lysopcaac181.smc261             | 0.049333138  | 0.053176287 | 0.355180178 |
| pcaec301.pcaec404               | 0.015917849  | 0.017158113 | 0.355186634 |
| asparagine.c0                   | 0.005660143  | 0.006103704 | 0.355386468 |
| c3.c8                           | -0.033957327 | 0.036625233 | 0.355475725 |
| pcaac401.pcaac385               | -0.039173351 | 0.042253434 | 0.35550265  |
| pcaec363.pcaec406               | 0.005107113  | 0.005509086 | 0.355538804 |
| asymmetricdimethylarginine.tyrc | -0.049802442 | 0.053723166 | 0.355546465 |
| lysopcaac161.ornithine          | 0.053301016  | 0.057514468 | 0.355690741 |
| pcaec321.pcaec425               | 0.028698791  | 0.030967538 | 0.355692349 |
| smc180.pcaac384                 | 0.067211166  | 0.072530967 | 0.355735369 |
| pcaac364.pcaec404               | -0.025787386 | 0.027828537 | 0.355736493 |
| pcaac360.c51                    | 0.050347784  | 0.054334318 | 0.355748424 |
| lysopcaac281.pcaec424           | 0.01286375   | 0.013882352 | 0.355750183 |

|                                |              |             |             |
|--------------------------------|--------------|-------------|-------------|
| pcaac321.tyrosine              | 0.076801255  | 0.082883309 | 0.355753842 |
| lysopcac204.glycine            | 0.045534582  | 0.049143573 | 0.355783217 |
| methioninesulfoxide.spermidine | 0.062087457  | 0.067018995 | 0.355859035 |
| pcaec421.c8                    | -0.056789075 | 0.061299941 | 0.355860389 |
| pcaac341.pcaac320              | 0.160449271  | 0.173196699 | 0.355867678 |
| c14.glutamicacid               | -0.044377061 | 0.047908341 | 0.355923693 |
| histidine.lysopcac170          | -0.018304804 | 0.019763488 | 0.355974396 |
| pcaac361.pcaec404              | -0.032338768 | 0.034916805 | 0.355988213 |
| pcaec381.pcaac363              | -0.019866634 | 0.021454657 | 0.356083431 |
| pcaec425.methionine            | -0.034309957 | 0.037055129 | 0.356117521 |
| glycine.lysopcac180            | 0.05341553   | 0.05769039  | 0.356126111 |
| pcaac344.pcaec421              | 0.003206554  | 0.003463447 | 0.356163623 |
| alphaaminoadipicacid.pcaac402  | -0.05991613  | 0.064738546 | 0.356328432 |
| isoleucine.c12                 | -0.036719395 | 0.039675357 | 0.356335213 |
| pcaec446.smc181                | 0.026444667  | 0.028578302 | 0.35641579  |
| pcaac240.methionine            | -0.050357611 | 0.054424102 | 0.35644653  |
| pcaec385.pcaec443              | -0.04540434  | 0.04908094  | 0.356545163 |
| smc161.leucine                 | -0.009833796 | 0.010632011 | 0.356632072 |
| pcaac343.c16                   | 0.035708555  | 0.03860741  | 0.356636664 |
| smc261.pcaac384                | 0.127322173  | 0.137677906 | 0.356704902 |
| c14.pcaac403                   | 0.005044367  | 0.00545605  | 0.356827984 |
| pcaec382.smc181                | -0.003979808 | 0.004304615 | 0.356828494 |
| pcaec340.pcaec360              | -0.008936944 | 0.009667015 | 0.356862893 |
| pcaac420.lysopcac160           | -0.022813742 | 0.024677542 | 0.356865146 |
| pcaec342.c102                  | 0.027456796  | 0.029700241 | 0.356870384 |
| c18.isoleucine                 | 0.016612749  | 0.017970511 | 0.356880093 |
| pcaac426.smc180                | -0.012277049 | 0.013281087 | 0.35690296  |
| lysopcac160.smohc241           | 0.087521945  | 0.094686034 | 0.356935338 |
| pcaac404.pcaac383              | 0.005363232  | 0.005802602 | 0.356965362 |
| smohc161.lysopcac181           | 0.051935771  | 0.056190953 | 0.356969384 |
| smc181.pcaec403                | 0.03608881   | 0.039048535 | 0.357005109 |
| lysopcac181.pcaec425           | 0.006442225  | 0.006971487 | 0.357068392 |
| lysopcac180.serine             | -0.050113496 | 0.054249206 | 0.357233037 |
| pcaac426.c18                   | 0.049133806  | 0.053190211 | 0.357246962 |
| phenylalanine.serine           | -0.016215977 | 0.0175552   | 0.357259505 |
| isoleucine.pcaec301            | 0.045241143  | 0.048981167 | 0.357295813 |
| c102.lysopcac160               | 0.016973969  | 0.018377697 | 0.357309171 |
| c14.lysopcac203                | -0.014856521 | 0.016093265 | 0.357551279 |
| methionine.tyrosine            | -0.063783872 | 0.069111464 | 0.35767507  |
| putrescine.lysopcac160         | 0.018846683  | 0.020424198 | 0.357753303 |
| smc202.pcaac403                | -0.008666492 | 0.009392199 | 0.357768607 |
| smohc221.smc180                | -0.014538128 | 0.015756448 | 0.357797162 |
| pcaec385.pcaac383              | 0.005202304  | 0.005639062 | 0.357864756 |



|                         |              |             |             |
|-------------------------|--------------|-------------|-------------|
| smohc141.smohc161       | 0.042735229  | 0.046325251 | 0.357887527 |
| c16.pcaec380            | -0.043023737 | 0.046642804 | 0.357936939 |
| c3.phenylalanine        | -0.029668184 | 0.032168847 | 0.358011985 |
| pcaac322.pcaec424       | 0.007052093  | 0.007646825 | 0.358032525 |
| pcaec342.phenylalanine  | 0.044984735  | 0.048778896 | 0.358036553 |
| pcaac425.valine         | -0.048185581 | 0.052250946 | 0.358047872 |
| prolinr.serine          | -0.008489959 | 0.009206704 | 0.358071611 |
| acetylmithoine.pcaec423 | -0.044274308 | 0.048013002 | 0.358081006 |
| smc260.c14              | 0.081303944  | 0.088194511 | 0.358216568 |
| lysine.serotonin        | 0.113756066  | 0.123412024 | 0.35827501  |
| pcaac401.lysopcac180    | -0.067050252 | 0.072743484 | 0.358286897 |
| pcaac342.pcaec301       | 0.070235858  | 0.076200861 | 0.358294952 |
| c10.valine              | 0.079022216  | 0.085736778 | 0.358313678 |
| lysopcac140.smc180      | -0.024493683 | 0.026583123 | 0.35846147  |
| c51.pcaac384            | -0.076996882 | 0.083578707 | 0.358539357 |
| pcaec364.pcaac380       | 0.065613729  | 0.071226284 | 0.358564797 |
| isoleucine.pcaac300     | -0.038307905 | 0.04159663  | 0.358701797 |
| pcaec404.creatinine     | -0.012543094 | 0.013620105 | 0.35870844  |
| pcaac381.lysopcac160    | 0.038681226  | 0.042008252 | 0.358773097 |
| lysopcac182.pcaac341    | 0.004200408  | 0.004562277 | 0.358834713 |
| c51.smc261              | 0.029272364  | 0.031798418 | 0.358898127 |
| pcaec360.leucine        | -0.007772994 | 0.008444942 | 0.358964946 |
| putrescine.pcaec341     | 0.044643466  | 0.048511138 | 0.359047975 |
| c162.pcaec322           | 0.066721839  | 0.07251059  | 0.359102986 |
| kynurenine.lysine       | -0.108002497 | 0.11737681  | 0.35911961  |
| pcaac360.pcaec363       | -0.03845224  | 0.041792247 | 0.359147822 |
| lysopcac180.arginine    | 0.052039463  | 0.056563885 | 0.359183496 |
| leucine.pcaec364        | -0.015310105 | 0.01664234  | 0.359216352 |
| pcaac380.pcaac364       | -0.049523082 | 0.05383469  | 0.359236578 |
| pcaac401.kynurenine     | 0.013074879  | 0.014213399 | 0.359242888 |
| pcaec386.pcaec363       | -0.040169707 | 0.043679764 | 0.359376739 |
| pcaac240.creatinine     | 0.006676397  | 0.00726106  | 0.359460833 |
| c12.h1                  | -0.002773214 | 0.003016795 | 0.359576118 |
| pcaec341.pcaac300       | 0.077978563  | 0.084835206 | 0.359618578 |
| pcaec386.spermidine     | -0.064114394 | 0.069764465 | 0.359704414 |
| prolinr.pcaec364        | 0.017923791  | 0.019504297 | 0.35972835  |
| asparticacid.pcaac323   | 0.119976057  | 0.130555738 | 0.359729403 |
| pcaec342.creatinine     | -0.00595451  | 0.006479635 | 0.359732877 |
| pcaec341.pcaac422       | -0.018620169 | 0.020263756 | 0.359767955 |
| pcaac281.smohc141       | 0.033888733  | 0.036891616 | 0.35991795  |
| smc261.kynurenine       | -0.003930414 | 0.00427886  | 0.359937187 |
| c181.pcaec363           | -0.018557216 | 0.020202725 | 0.359945281 |
| pcaac386.c3             | 0.027721938  | 0.030182921 | 0.359989992 |

|                               |              |             |             |
|-------------------------------|--------------|-------------|-------------|
| pcaac365.pcaec425             | 0.004213954  | 0.004588324 | 0.3600193   |
| serine.lysopcac160            | -0.014978671 | 0.016310382 | 0.360048623 |
| glutamicacid.pcaac320         | 0.113834869  | 0.123958189 | 0.360058613 |
| pcaac361.pcaac240             | -0.014628005 | 0.015929472 | 0.360076674 |
| c162.pcaec425                 | 0.005658962  | 0.006162969 | 0.360117397 |
| alphaaminoadipicacid.pcaac320 | 0.039099646  | 0.042583027 | 0.360128952 |
| smc240.lysopcac170            | -0.013521034 | 0.014726095 | 0.360144382 |
| c102.pcaec406                 | -0.005858498 | 0.006382047 | 0.360250262 |
| pcaac342.pcaec425             | 0.006458404  | 0.007035743 | 0.360262457 |
| pcaec383.pcaec421             | -0.01408891  | 0.01535133  | 0.360354876 |
| prolinr.smc181                | -0.009728744 | 0.010601864 | 0.360417608 |
| pcaec402.c181                 | -0.021180633 | 0.023082398 | 0.360435803 |
| pcaec446.pcaac380             | -0.087307312 | 0.095180012 | 0.360604662 |
| putrescine.c141oh             | 0.112252702  | 0.122399659 | 0.360701975 |
| c141.arginine                 | 0.039904838  | 0.043512758 | 0.360710422 |
| serine.smohc141               | -0.073288364 | 0.079914691 | 0.360711009 |
| pcaac386.creatinine           | 0.023356995  | 0.025473865 | 0.360806126 |
| spermidine.lysopcac180        | 0.12518007   | 0.136538679 | 0.360853124 |
| pcaec381.c51dc                | 0.131993059  | 0.143985922 | 0.360906515 |
| pcaec300.phenylalanine        | 0.031359271  | 0.034216363 | 0.361015605 |
| smc240.pcaec342               | 0.099023574  | 0.108055833 | 0.361061602 |
| pcaac406.pcaec301             | 0.073102128  | 0.079773733 | 0.361083953 |
| pcaec380.c141oh               | -0.08607079  | 0.09392884  | 0.361098586 |
| c18.serotonin                 | -0.092216476 | 0.100646014 | 0.361148067 |
| pcaac385.asparticacid         | 0.034425136  | 0.037573113 | 0.3611629   |
| smc181.c102                   | 0.025162254  | 0.027471231 | 0.36130296  |
| pcaec301.c14                  | 0.040101477  | 0.043782487 | 0.361315622 |
| c162.c14                      | -0.033922818 | 0.037038324 | 0.361336942 |
| glutamicacid.smc181           | -0.022080857 | 0.024109849 | 0.361358065 |
| lysopcac160.pcaec361          | 0.005885939  | 0.006427093 | 0.361380426 |
| pcaac383.pcaec386             | 0.010715496  | 0.011702316 | 0.361447287 |
| pcaac420.pcaac380             | -0.113471375 | 0.123931453 | 0.361486643 |
| pcaac385.leucine              | -0.007942359 | 0.008674728 | 0.361498906 |
| alanine.c10                   | -0.005070802 | 0.005538603 | 0.361517934 |
| pcaac402.pcaac361             | 0.069513567  | 0.075933598 | 0.361562895 |
| pcaac402.pcaac421             | -0.065554814 | 0.071614391 | 0.361597401 |
| pcaac424.pcaac403             | 0.019616065  | 0.021430266 | 0.361619386 |
| pcaac300.c10                  | -0.003129855 | 0.003419656 | 0.361666186 |
| pcaac366.pcaac405             | -0.062098167 | 0.06784993  | 0.361679959 |
| pcaac424.glutamicacid         | 0.088158903  | 0.096337793 | 0.361745966 |
| serotonin.pcaac380            | -0.06407201  | 0.070018519 | 0.361761462 |
| pcaac404.pcaac344             | -0.077644475 | 0.084853587 | 0.361778073 |
| glycine.serine                | -0.027644249 | 0.030212743 | 0.361806423 |

|                               |              |             |             |
|-------------------------------|--------------|-------------|-------------|
| lysopcac204.phenylalanine     | 0.055955518  | 0.061162149 | 0.361866429 |
| pcaec423.smc161               | 0.096244643  | 0.105200408 | 0.361867575 |
| pcaec340.pcaac361             | -0.042515656 | 0.046472488 | 0.361874389 |
| pcaac426.pcaec425             | 0.005431471  | 0.005937829 | 0.361944045 |
| c182.pcaec363                 | -0.012666289 | 0.013851218 | 0.362085435 |
| pcaac401.serotonin            | -0.116903284 | 0.127845946 | 0.362109346 |
| pcaec342.spermidine           | -0.065241946 | 0.071356264 | 0.362158873 |
| smc202.pcaec425               | 0.004392305  | 0.004804059 | 0.362170581 |
| alphaaminoadipicacid.pcaac344 | -0.047183227 | 0.051612516 | 0.362227407 |
| pcaac405.smohc241             | 0.042612515  | 0.046614297 | 0.362243482 |
| c142.c51dc                    | -0.119348252 | 0.130562532 | 0.362266101 |
| asparticacid.c16              | 0.047214161  | 0.051663536 | 0.362386599 |
| smc181.serine                 | -0.054372956 | 0.059500701 | 0.362416663 |
| pcaec385.pcaec406             | 0.034604127  | 0.037869951 | 0.362447184 |
| pcaec386.c10                  | -0.002845752 | 0.003114714 | 0.362506989 |
| pcaec341.pcaec425             | 0.004057319  | 0.004440929 | 0.362521924 |
| c12.pcaac386                  | 0.017514194  | 0.019172681 | 0.362585857 |
| pcaac402.smc181               | -0.004443541 | 0.00486457  | 0.362610677 |
| pcaec365.pcaec421             | 0.000888069  | 0.000972305 | 0.362655505 |
| pcaac425.smc180               | -0.006908321 | 0.007563824 | 0.362669796 |
| c4.c2                         | 0.062368193  | 0.068290252 | 0.362699173 |
| smc180.pcaec421               | 0.001628351  | 0.001782999 | 0.362707425 |
| pcaac322.methionine           | -0.025417881 | 0.027832855 | 0.36272435  |
| methioninesulfoxide.smc181    | -0.004152185 | 0.004547064 | 0.362764001 |
| pcaec423.c16                  | 0.025799388  | 0.028254478 | 0.362789886 |
| pcaac321.h1                   | 0.002105562  | 0.002305956 | 0.362795552 |
| pcaac343.lysopcac180          | -0.067558277 | 0.073988938 | 0.362801275 |
| methioninesulfoxide.pcaac363  | -0.021399791 | 0.023438006 | 0.362826513 |
| isoleucine.phenylalanine      | 0.079560422  | 0.087143618 | 0.362856668 |
| acetylmithoine.pcaac420       | 0.085434598  | 0.093586184 | 0.362900128 |
| c12.c0                        | -0.001306641 | 0.001431388 | 0.362925326 |
| pcaac362.pcaec425             | 0.006386883  | 0.006997234 | 0.362965637 |
| pcaac384.smohc221             | 0.032107771  | 0.035176155 | 0.362966493 |
| pcaec406.pcaec425             | 0.004003184  | 0.004386566 | 0.363055596 |
| smc160.pcaec341               | 0.089658761  | 0.098261428 | 0.36313409  |
| c141.pcaec425                 | 0.0039269    | 0.004303871 | 0.363155047 |
| pcaec423.smc180               | -0.006255872 | 0.006856454 | 0.363157657 |
| smohc161.pcaec406             | 0.00787867   | 0.008636585 | 0.36324292  |
| glutamine.pcaac343            | -0.020490897 | 0.022463666 | 0.363276566 |
| pcaec381.pcaac365             | -0.06027564  | 0.066081732 | 0.363298492 |
| pcaec420.pcaec425             | 0.002524604  | 0.00276784  | 0.363307438 |
| smc180.pcaac426               | 0.034085514  | 0.0373776   | 0.363410832 |
| pcaac401.pcaac420             | -0.16095536  | 0.176557741 | 0.363564758 |

|                                 |              |             |             |
|---------------------------------|--------------|-------------|-------------|
| glycine.pcaec425                | 0.005426233  | 0.005952366 | 0.363575589 |
| pcaec343.pcaec364               | -0.016475944 | 0.018076335 | 0.363651501 |
| pcaec424.c102                   | -0.022693295 | 0.024903    | 0.363755058 |
| pcaac403.c181                   | -0.016646267 | 0.018268555 | 0.363791657 |
| pcaac405.pcaac403               | -0.006186034 | 0.006789108 | 0.363806101 |
| smohc141.pcaec363               | -0.075115827 | 0.082451769 | 0.36388107  |
| serine.pcaac422                 | -0.06832723  | 0.075007827 | 0.363929797 |
| c181.serotonin                  | -0.088057491 | 0.09666794  | 0.363933522 |
| c142.pcaac381                   | -0.015003747 | 0.016471686 | 0.363957916 |
| pcaec361.glutamicacid           | 0.053655444  | 0.058906986 | 0.363974114 |
| c14.c10                         | -0.005079836 | 0.005577043 | 0.363975501 |
| pcaec301.c0                     | 0.00082131   | 0.000901713 | 0.363983007 |
| acetylmethionine.pcaec404       | 0.025171829  | 0.027636273 | 0.363986982 |
| c10.pcaec382                    | -0.013387058 | 0.014700073 | 0.36406369  |
| putrescine.serine               | -0.016141611 | 0.017727289 | 0.364130952 |
| pcaac323.lysopcac203            | 0.029711315  | 0.032633208 | 0.364177713 |
| pcaac322.pcaec425               | 0.007273061  | 0.007988481 | 0.364187692 |
| c16.serine                      | 0.026962184  | 0.029619893 | 0.364277383 |
| pcaac360.pcaec362               | 0.027895265  | 0.030649064 | 0.364341592 |
| c12.pcaac323                    | -0.069720071 | 0.076610224 | 0.364388044 |
| lysine.pcaec443                 | 0.053824039  | 0.05914506  | 0.36440267  |
| pcaec360.alanine                | -0.012911244 | 0.014189654 | 0.364470399 |
| smc202.lysopcac180              | -0.041946561 | 0.046102066 | 0.364492773 |
| pcaec443.pcaec403               | 0.07236863   | 0.079540709 | 0.364509376 |
| smc161.pcaac406                 | -0.02224797  | 0.024453499 | 0.364522036 |
| smc181.isoleucine               | 0.020182944  | 0.022184861 | 0.364545803 |
| lysopcac182.arginine            | -0.062874791 | 0.069140518 | 0.364748255 |
| asymmetricdimethylarginine.smc  | -0.073526558 | 0.080858237 | 0.364774628 |
| c10.pcaac425                    | -0.078918363 | 0.086800565 | 0.364845588 |
| lysopcac203.pcaec406            | 0.021996869  | 0.024196565 | 0.364898834 |
| pcaec420.lysopcac280            | 0.007445823  | 0.008191287 | 0.364950094 |
| pcaec420.smohc141               | -0.028404454 | 0.031249462 | 0.364968457 |
| pcaac320.smohc141               | -0.03537248  | 0.038918904 | 0.365011398 |
| lysopcac182.pcaec406            | 0.003560749  | 0.003918173 | 0.36506323  |
| pcaec381.pcaac406               | -0.075548189 | 0.083137807 | 0.365098813 |
| methioninesulfoxide.transhydrox | -0.058170442 | 0.064016476 | 0.365115199 |
| c16.c141oh                      | -0.066295903 | 0.072961588 | 0.365135228 |
| pcaac341.pcaac385               | -0.0305151   | 0.033586938 | 0.365188099 |
| pcaec424.transhydroxyproline    | 0.047626515  | 0.05242156  | 0.365194166 |
| pcaac365.lysopcac182            | -0.013050498 | 0.014364906 | 0.365210197 |
| putrescine.pcaac321             | -0.014209604 | 0.015641952 | 0.365246832 |
| pcaac384.tyrosine               | -0.064610474 | 0.071125682 | 0.365262833 |
| pcaec404.pcaec403               | 0.079369197  | 0.087373967 | 0.365270046 |

|                                |              |             |             |
|--------------------------------|--------------|-------------|-------------|
| serine.c16                     | 0.033053427  | 0.036390358 | 0.365313825 |
| h1.pcaac406                    | 0.10531927   | 0.115977265 | 0.365418593 |
| c162.glutamicacid              | -0.054101642 | 0.059577746 | 0.365428054 |
| lysopcac181.c51dc              | 0.130794471  | 0.144039418 | 0.365448257 |
| pcaac240.glutamicacid          | 0.065481445  | 0.072113949 | 0.365458224 |
| pcaac405.leucine               | -0.051127869 | 0.056307278 | 0.365464626 |
| pcaac426.isoleucine            | 0.037495226  | 0.041300187 | 0.365540789 |
| pcaac322.pcaac384              | 0.056680354  | 0.06243482  | 0.365560899 |
| pcaac424.pcaac322              | 0.049259187  | 0.054263397 | 0.365588876 |
| lysopcac182.pcaac425           | 0.007345072  | 0.008091803 | 0.365621312 |
| c101.lysopcac280               | 0.02376475   | 0.026184261 | 0.365684997 |
| pcaac386.pcaac385              | -0.027388481 | 0.030187969 | 0.36585985  |
| c141.pcaac386                  | 0.015810098  | 0.017427088 | 0.365886584 |
| c2.acetylmethionine            | -0.040092512 | 0.044194767 | 0.365905672 |
| pcaac402.smc241                | -0.075185939 | 0.082885575 | 0.365943903 |
| pcaac322.pcaac422              | -0.026868202 | 0.029621002 | 0.365964615 |
| c3.pcaac341                    | -0.045193244 | 0.049823931 | 0.365968278 |
| pcaac402.pcaac365              | -0.058666658 | 0.064684623 | 0.36601805  |
| pcaac425.c141                  | -0.042285025 | 0.046628223 | 0.366075899 |
| pcaac344.pcaac240              | -0.03416698  | 0.03768777  | 0.366220679 |
| c12.pcaac380                   | -0.044843817 | 0.049469893 | 0.366269706 |
| smohc141.pcaac365              | -0.053270013 | 0.058770979 | 0.366315605 |
| smc261.serine                  | -0.023634551 | 0.026077086 | 0.366350344 |
| serine.pcaac240                | -0.01177539  | 0.012992526 | 0.366357626 |
| pcaac422.c14                   | -0.046946261 | 0.051805427 | 0.366419173 |
| asparticacid.pcaac406          | -0.007632725 | 0.0084238   | 0.36647879  |
| prolinr.pcaac381               | 0.019688748  | 0.021732052 | 0.366538418 |
| c181.smc261                    | 0.073835785  | 0.081503549 | 0.366568128 |
| smohc222.smc181                | -0.057158431 | 0.063096527 | 0.366585211 |
| lysopcac281.pcaac425           | 0.003289333  | 0.003631229 | 0.366607897 |
| lysopcac161.pcaac360           | 0.032577912  | 0.035966714 | 0.366642826 |
| pcaac342.lysopcac181           | 0.035112631  | 0.038767146 | 0.366668056 |
| lysopcac180.spermidine         | 0.065860744  | 0.072727629 | 0.366747643 |
| asymmetricdimethylarginine.pca | -0.003580304 | 0.003954201 | 0.366820355 |
| pcaac402.serine                | 0.115038524  | 0.127067006 | 0.366876025 |
| c8.smohc241                    | -0.086667498 | 0.095740455 | 0.366930732 |
| c0.smc202                      | -0.041051572 | 0.045352173 | 0.366962724 |
| pcaac342.leucine               | -0.008878709 | 0.009809344 | 0.366986736 |
| smohc241.pcaac403              | -0.019685006 | 0.021748515 | 0.36699104  |
| c141oh.glutamicacid            | -0.047098362 | 0.052037459 | 0.367008886 |
| pcaac240.smohc221              | 0.12647376   | 0.139744577 | 0.367035574 |
| smc160.lysopcac182             | -0.041710714 | 0.046101397 | 0.367180693 |
| pcaac380.pcaac343              | 0.071837091  | 0.079404313 | 0.367212478 |

|                                |              |             |             |
|--------------------------------|--------------|-------------|-------------|
| c16.lysopcac181                | -0.08801235  | 0.097290985 | 0.367249464 |
| pcaac380.tyrosine              | -0.056287192 | 0.062225472 | 0.367282064 |
| pcaac323.pcaec360              | -0.006009577 | 0.006643617 | 0.367284339 |
| pcaac386.pcaac381              | -0.026117213 | 0.028872718 | 0.367284497 |
| pcaec444.leucine               | -0.006140774 | 0.006790235 | 0.367395437 |
| pcaac385.pcaac380              | 0.046575305  | 0.051502983 | 0.367411912 |
| c4.pcaec340                    | -0.045176273 | 0.049964635 | 0.367495103 |
| pcaac365.arginine              | 0.046839742  | 0.051810097 | 0.367547446 |
| pcaec301.pcaac361              | -0.057046419 | 0.063110191 | 0.367625754 |
| c142.lysopcac180               | -0.034458644 | 0.038122091 | 0.367633917 |
| c101.pcaac425                  | -0.079055175 | 0.087460138 | 0.367635368 |
| c3.pcaac384                    | -0.036583602 | 0.040473712 | 0.367642765 |
| smohc221.pcaac402              | -0.042307054 | 0.046816722 | 0.367754541 |
| pcaec445.pcaac424              | 0.015071862  | 0.016679626 | 0.367788853 |
| pcaec386.c101                  | -0.012689467 | 0.014044116 | 0.367823635 |
| pcaec382.c141                  | 0.043670809  | 0.048337417 | 0.367868888 |
| c182.lysine                    | 0.072453265  | 0.080217423 | 0.36799925  |
| pcaec421.pcaec360              | -0.006103736 | 0.006759049 | 0.368086199 |
| pcaec361.serotonin             | -0.114497813 | 0.126811677 | 0.368165628 |
| histidine.smohc222             | 0.006440212  | 0.007133477 | 0.368208573 |
| pcaac323.pcaac300              | 0.040606743  | 0.044980045 | 0.368231238 |
| lysopcac281.lysine             | -0.067042499 | 0.074284746 | 0.36837167  |
| pcaac381.c141                  | 0.051386535  | 0.056938298 | 0.368377938 |
| alanine.lysopcac181            | 0.027464778  | 0.030437527 | 0.368463818 |
| pcaec384.serotonin             | -0.109124723 | 0.120955996 | 0.36854186  |
| smc241.lysopcac181             | 0.056868432  | 0.063042071 | 0.368602288 |
| pcaec342.pcaec406              | 0.005678681  | 0.006295194 | 0.368604957 |
| lysopcac280.pcaac365           | -0.067423593 | 0.074752595 | 0.368662934 |
| pcaac380.pcaac363              | -0.020667602 | 0.022915445 | 0.368689139 |
| pcaac425.pcaec405              | -0.064991177 | 0.072072189 | 0.368771692 |
| c142.pcaec425                  | 0.014560341  | 0.016148881 | 0.368835004 |
| c3.c2                          | 0.046352183  | 0.051413192 | 0.368871794 |
| pcaac386.c10                   | -0.002820348 | 0.003128489 | 0.368902053 |
| pcaec384.lysopcac170           | -0.010008589 | 0.011103315 | 0.368954742 |
| methioninesulfoxide.pcaec401   | 0.043436661  | 0.048204429 | 0.369120364 |
| pcaac344.asymmetricdimethylar; | 0.014511864  | 0.016106635 | 0.369176533 |
| pcaac341.c16                   | 0.037291186  | 0.041390819 | 0.369194336 |
| asparticacid.lysopcac170       | -0.02879269  | 0.031973724 | 0.369428624 |
| pcaec342.pcaac385              | -0.021706379 | 0.024105579 | 0.36944972  |
| c5.pcaec423                    | 0.030389125  | 0.033749703 | 0.369473438 |
| pcaec301.c142                  | 0.02931616   | 0.032558698 | 0.369482431 |
| pcaec365.putrescine            | -0.072449949 | 0.080464921 | 0.369491838 |
| c51.h1                         | 0.003038463  | 0.00337495  | 0.369541132 |

|                              |              |             |             |
|------------------------------|--------------|-------------|-------------|
| histidine.pcaec362           | -0.013903042 | 0.015444373 | 0.369592876 |
| c51dc.pcaac381               | -0.024982161 | 0.027755723 | 0.369661131 |
| pcaec364.smc181              | 0.023771105  | 0.026411828 | 0.369691394 |
| pcaec322.lysopcac281         | 0.044689595  | 0.04967444  | 0.369885297 |
| pcaec364.c182                | -0.030541475 | 0.033955732 | 0.369991365 |
| pcaac341.leucine             | -0.006431553 | 0.007151312 | 0.370042816 |
| pcaac363.asparticacid        | 0.026866798  | 0.029874589 | 0.37006052  |
| putrescine.pcaec425          | 0.00169031   | 0.001879728 | 0.370107216 |
| pcaec422.lysopcac181         | -0.075777029 | 0.084273786 | 0.370136223 |
| c5.pcaac386                  | -0.052805984 | 0.058728389 | 0.370147237 |
| putrescine.pcaac385          | 0.031051988  | 0.03454958  | 0.370354233 |
| c4.pcaec421                  | 0.000860334  | 0.000957256 | 0.370362353 |
| pcaec340.pcaec425            | 0.003801224  | 0.004229635 | 0.370382873 |
| pcaec405.pcaac342            | 0.058414402  | 0.064998037 | 0.370383833 |
| pcaac300.pcaac380            | 0.045849758  | 0.051018036 | 0.370390845 |
| asparticacid.c10             | 0.01376746   | 0.015323786 | 0.370528792 |
| lysopcac280.pcaec425         | 0.005775089  | 0.006428483 | 0.370570045 |
| alanine.smc180               | -0.046639538 | 0.051918709 | 0.370591833 |
| pcaec365.lysopcac160         | -0.016478542 | 0.018344003 | 0.370598072 |
| leucine.histidine            | 0.086913828  | 0.096756317 | 0.370614682 |
| serotonin.pcaec342           | -0.081894074 | 0.091171709 | 0.370633544 |
| pcaec340.spermidine          | -0.065213476 | 0.07261636  | 0.370731865 |
| pcaec420.pcaac360            | -0.035324149 | 0.039339585 | 0.370798805 |
| isoleucine.lysopcac160       | 0.017229472  | 0.019190074 | 0.370850006 |
| asparagine.smc160            | 0.07569664   | 0.084322277 | 0.370917048 |
| c102.pcaac281                | 0.002218872  | 0.002471929 | 0.370958805 |
| pcaec381.putrescine          | -0.072134394 | 0.08036531  | 0.370983513 |
| pcaac403.pcaec362            | 0.011035922  | 0.012296482 | 0.37103403  |
| pcaac402.pcaac323            | -0.118679966 | 0.132245377 | 0.371067916 |
| pcaac381.pcaec406            | -0.017108214 | 0.019064657 | 0.371091238 |
| c3.c141oh                    | -0.115737431 | 0.128975731 | 0.371102045 |
| pcaac322.pcaac383            | -0.006807669 | 0.007586352 | 0.371102482 |
| prolinr.c0                   | -0.001076975 | 0.00120024  | 0.371133481 |
| c181.pcaac344                | 0.033944577  | 0.037834432 | 0.371192834 |
| spermidine.c142              | -0.146814196 | 0.163647425 | 0.371219521 |
| arginine.lysopcac170         | 0.018010763  | 0.020077338 | 0.371255643 |
| smc160.alanine               | -0.01810317  | 0.020180471 | 0.371258556 |
| pcaac343.creatinine          | -0.00601842  | 0.006709354 | 0.371282194 |
| pcaac363.pcaac321            | -0.022961911 | 0.025598394 | 0.371289332 |
| methioninesulfoxide.pcaac321 | 0.018927387  | 0.021101777 | 0.37131532  |
| pcaec446.pcaec402            | -0.029150155 | 0.032503881 | 0.371387783 |
| pcaac386.pcaac403            | 0.021114091  | 0.023543272 | 0.371387879 |
| kynurenine.pcaec340          | -0.033653042 | 0.037526133 | 0.371404413 |

|                                 |              |             |             |
|---------------------------------|--------------|-------------|-------------|
| smc180.smc260                   | 0.039532323  | 0.044085286 | 0.37143938  |
| ornithine.c12                   | 0.054914699  | 0.061246606 | 0.37149658  |
| pcaec380.pcaac281               | -0.003425802 | 0.003821844 | 0.371625346 |
| c8.valine                       | 0.072627535  | 0.081027153 | 0.37164576  |
| lysopcac204.pcaec383            | 0.098136631  | 0.10950964  | 0.371746703 |
| pcaac343.pcaec322               | 0.05564312   | 0.062100224 | 0.371813112 |
| pcaec425.pcaac426               | -0.081879062 | 0.091397931 | 0.371902935 |
| c142.prolinr                    | 0.04733063   | 0.052834452 | 0.37191547  |
| c14.pcaec420                    | -0.022321053 | 0.02492043  | 0.371987847 |
| citruline.pcaac361              | 0.042103875  | 0.047011038 | 0.372028397 |
| smc161.lysopcac160              | -0.029167464 | 0.032569178 | 0.372061713 |
| pcaac385.lysopcac182            | -0.012469824 | 0.013924695 | 0.372080627 |
| pcaec364.pcaec420               | -0.01850636  | 0.020665543 | 0.372081151 |
| pcaec360.pcaec425               | 0.002635142  | 0.002942711 | 0.372100655 |
| pcaac366.pcaac402               | -0.054360683 | 0.060716579 | 0.37218715  |
| pcaec406.pcaec404               | -0.009745999 | 0.010885515 | 0.372187434 |
| lysopcac204.c0                  | 0.000636874  | 0.000711381 | 0.372216094 |
| spermidine.methionine           | 0.009436423  | 0.010541509 | 0.372267283 |
| pcaac424.pcaac321               | 0.014731021  | 0.016457456 | 0.372305139 |
| pcaec423.pcaec403               | 0.044296723  | 0.049493969 | 0.372360926 |
| c14.pcaac281                    | -0.001033134 | 0.001154415 | 0.37238811  |
| pcaac386.asparagine             | -0.011855573 | 0.013247539 | 0.372396024 |
| pcaec425.smohc141               | -0.017280191 | 0.019309155 | 0.372398293 |
| c2.transhydroxyproline          | 0.038517855  | 0.043043528 | 0.37243236  |
| pcaec343.pcaec406               | 0.004492869  | 0.005021488 | 0.372501474 |
| pcaac300.c12                    | 0.047317894  | 0.052886537 | 0.372513543 |
| lysopcac182.c0                  | 0.000683663  | 0.000764304 | 0.372628567 |
| pcaec322.c142                   | 0.051377881  | 0.057446393 | 0.372696675 |
| c182.serine                     | 0.02529115   | 0.028279889 | 0.372721433 |
| smohc161.pcaac405               | -0.061649124 | 0.068939387 | 0.372755869 |
| methioninesulfoxide.lysopcac20. | 0.007360405  | 0.008231023 | 0.37276862  |
| pcaec341.pcaac363               | -0.010037069 | 0.01122468  | 0.372785009 |
| pcaac405.pcaec404               | -0.011142884 | 0.012462321 | 0.372822626 |
| glutamine.pcaec445              | -0.060685491 | 0.0678729   | 0.372833818 |
| c51dc.pcaec340                  | -0.040623889 | 0.045447761 | 0.372964921 |
| pcaac402.pcaec424               | 0.021323583  | 0.023856393 | 0.372979845 |
| acetylornithoine.c12            | -0.05486089  | 0.061377718 | 0.372983458 |
| pcaac402.pcaec444               | -0.145886655 | 0.163227566 | 0.373016437 |
| c101.serine                     | 0.010715469  | 0.011989423 | 0.373026491 |
| smc180.c51dc                    | -0.112619379 | 0.126034592 | 0.373124743 |
| pcaec365.pcaec420               | -0.020037283 | 0.022426857 | 0.373182859 |
| pcaac363.c141oh                 | -0.110479782 | 0.123660451 | 0.373203075 |
| pcaac343.pcaec402               | -0.024995983 | 0.027978291 | 0.373206314 |



|                              |              |             |             |
|------------------------------|--------------|-------------|-------------|
| c8.pcaec386                  | 0.005920888  | 0.006627572 | 0.373224546 |
| pcaec405.smohc241            | 0.06865265   | 0.076861891 | 0.373319107 |
| c181.c102                    | 0.042945255  | 0.048083369 | 0.373347572 |
| serine.smc261                | 0.030784121  | 0.034471423 | 0.37340545  |
| pcaec385.pcaec420            | -0.027903902 | 0.031250197 | 0.373466194 |
| pcaac380.c10                 | -0.00258387  | 0.002893804 | 0.373477917 |
| pcaec363.pcaac383            | 0.006963419  | 0.007800768 | 0.373605575 |
| arginine.pcaec383            | -0.086140581 | 0.096503875 | 0.373629828 |
| c181.lysopcac281             | 0.010468842  | 0.011728747 | 0.373647429 |
| pcaec386.pcaac364            | -0.054384885 | 0.060937113 | 0.373703006 |
| smohc222.ornithine           | 0.031437281  | 0.035228348 | 0.37375089  |
| pcaac404.smohc241            | 0.048707349  | 0.054590043 | 0.373829478 |
| c18.pcaac344                 | -0.053195549 | 0.059624607 | 0.373863802 |
| pcaac281.pcaec382            | 0.01008391   | 0.011303721 | 0.373910166 |
| histidine.putrescine         | -0.025180546 | 0.028236082 | 0.374071208 |
| pcaac323.smc180              | -0.01280971  | 0.014366306 | 0.374144134 |
| pcaac425.pcaec425            | 0.023829152  | 0.026728874 | 0.374216851 |
| pcaec360.lysopcac281         | 0.01834097   | 0.020573507 | 0.374232142 |
| pcaec445.pcaac386            | 0.022153078  | 0.024851207 | 0.374262182 |
| pcaac406.h1                  | 0.002609531  | 0.002927438 | 0.37427516  |
| pcaec343.pcaac300            | -0.090733065 | 0.101793945 | 0.374309295 |
| pcaac384.glycine             | 0.028109272  | 0.031542338 | 0.374405727 |
| alanine.tyrosine             | 0.067147237  | 0.075365855 | 0.374517811 |
| smc241.pcaac383              | 0.003833972  | 0.004303293 | 0.374523747 |
| kynurenine.c8                | 0.042182599  | 0.04734882  | 0.374549987 |
| citruiline.c0                | 0.000305759  | 0.00034322  | 0.374568701 |
| pcaac426.pcaac380            | 0.050157673  | 0.056304004 | 0.374578581 |
| pcaac343.pcaac422            | -0.023003317 | 0.025824643 | 0.374624617 |
| lysopcac281.putrescine       | -0.054306271 | 0.060967763 | 0.374631642 |
| c181.pcaac422                | 0.028835593  | 0.032376627 | 0.374689156 |
| pcaec425.lysopcac181         | -0.067346324 | 0.075621072 | 0.374717898 |
| pcaac426.methionine          | -0.035950453 | 0.040370365 | 0.374750113 |
| pcaac403.pcaac365            | -0.088543631 | 0.099436301 | 0.374782262 |
| c5.arginine                  | -0.072066503 | 0.080935221 | 0.374800326 |
| putrescine.pcaec421          | 0.005178468  | 0.00581611  | 0.3748301   |
| c3.c162                      | 0.101606636  | 0.11412484  | 0.374859544 |
| pcaec360.c10                 | -0.002772718 | 0.003114519 | 0.374889253 |
| pcaac380.pcaec425            | 0.00266695   | 0.002995865 | 0.374913553 |
| pcaec340.c2                  | -0.060800072 | 0.068314288 | 0.375023297 |
| pcaac403.pcaac240            | -0.023777749 | 0.02671643  | 0.375023558 |
| pcaac281.pcaac380            | 0.045233356  | 0.05082547  | 0.375039902 |
| methioninesulfoxide.pcaac240 | -0.024474611 | 0.027502101 | 0.375070036 |
| pcaac341.pcaec425            | 0.00345688   | 0.003884802 | 0.375107784 |

|                                |              |             |             |
|--------------------------------|--------------|-------------|-------------|
| pcaac300.pcaec446              | -0.044153102 | 0.049620116 | 0.375120997 |
| creatinine.pcaec406            | 0.007110047  | 0.007990435 | 0.375122538 |
| asymmetricdimethylarginine.pca | 0.012537997  | 0.014091458 | 0.375155247 |
| lysopcac170.pcaec383           | 0.136541769  | 0.153495635 | 0.375267857 |
| c141oh.taurine                 | -0.032467515 | 0.036501366 | 0.375300271 |
| glycine.pcaec424               | -0.007423593 | 0.008346903 | 0.375356353 |
| pcaac384.ornithine             | 0.025062255  | 0.028181519 | 0.375392568 |
| smc241.pcaac406                | -0.061941094 | 0.069657383 | 0.375440831 |
| smc160.pcaac402                | -0.087312467 | 0.098200364 | 0.37549406  |
| lysopcac170.pcaec406           | -0.039874355 | 0.044853005 | 0.375560968 |
| smc240.pcaac422                | -0.031242132 | 0.03515055  | 0.375663562 |
| pcaec360.tyrosine              | -0.060740676 | 0.0683511   | 0.375745141 |
| prolinr.pcaec425               | -0.016527253 | 0.018598422 | 0.375755578 |
| c4.pcaec386                    | 0.012875583  | 0.014489621 | 0.375771728 |
| pcaac401.pcaec382              | -0.057860894 | 0.0651163   | 0.375787547 |
| glycine.pcaec341               | 0.040312559  | 0.045368452 | 0.375797433 |
| glutamicacid.spermidine        | 0.0614208    | 0.069126964 | 0.375817624 |
| serine.taurine                 | -0.032071845 | 0.036098202 | 0.375850081 |
| pcaec382.c142                  | 0.028001655  | 0.03152155  | 0.375918303 |
| c5.c3                          | 0.042056329  | 0.047344428 | 0.375933255 |
| creatinine.kynurenine          | -0.022093638 | 0.024872222 | 0.375944025 |
| pcaec444.arginine              | -0.035298226 | 0.039739    | 0.375962346 |
| pcaec404.pcaec382              | -0.061627082 | 0.069390193 | 0.376030772 |
| pcaac422.pcaac344              | -0.04740089  | 0.053380541 | 0.376107475 |
| c51.pcaec402                   | -0.020150151 | 0.022692391 | 0.37611348  |
| methioninesulfoxide.lysopcac16 | 0.160384219  | 0.180631674 | 0.376146704 |
| c12.pcaec443                   | -0.073225202 | 0.082471394 | 0.376158194 |
| asymmetricdimethylarginine.pca | -0.015656841 | 0.017636349 | 0.376225905 |
| pcaec404.pcaac406              | -0.045574821 | 0.051336908 | 0.376226117 |
| pcaac404.pcaec301              | 0.064172398  | 0.072291079 | 0.37626086  |
| kynurenine.pcaec406            | 0.011740407  | 0.013226181 | 0.376277147 |
| pcaec383.pcaac420              | 0.124921449  | 0.140743568 | 0.376321248 |
| smohc141.c141                  | 0.025088     | 0.028266899 | 0.376343805 |
| pcaac422.pcaec343              | 0.066744097  | 0.075216532 | 0.376440583 |
| lysopcac203.c51                | -0.075971087 | 0.085636531 | 0.376561421 |
| pcaac360.smohc241              | 0.065751213  | 0.074117723 | 0.376569727 |
| pcaac404.pcaec385              | -0.020797787 | 0.023445786 | 0.376601899 |
| putrescine.c102                | -0.032302039 | 0.03641673  | 0.376627476 |
| lysopcac161.serotonin          | -0.119819873 | 0.135087923 | 0.37664573  |
| pcaec401.lysopcac180           | -0.069615436 | 0.078493698 | 0.376691283 |
| c10.serotonin                  | -0.083759193 | 0.09446793  | 0.376825683 |
| pcaac321.c10                   | -0.007542559 | 0.008507769 | 0.376875074 |
| pcaec385.c0                    | 0.000369852  | 0.000417183 | 0.376877056 |

|                               |              |             |             |
|-------------------------------|--------------|-------------|-------------|
| lysopcac182.pcaac300          | -0.03889765  | 0.0438806   | 0.376932263 |
| pcaac240.pcaec422             | 0.095024606  | 0.107208236 | 0.376979237 |
| pcaac384.valine               | -0.058452436 | 0.065951651 | 0.377013173 |
| isoleucine.leucine            | -0.043837453 | 0.049462773 | 0.377024237 |
| c181.lysopcac170              | -0.020063805 | 0.022643485 | 0.377130299 |
| c51dc.h1                      | 0.005727887  | 0.00646451  | 0.377142534 |
| pcaac341.pcaac406             | -0.043283431 | 0.048850831 | 0.37715255  |
| pcaec386.pcaec382             | 0.016474414  | 0.018594692 | 0.377184026 |
| pcaac420.pcaec425             | 0.004309986  | 0.004864943 | 0.377209115 |
| smohc241.pcaac381             | -0.020385881 | 0.023010792 | 0.377209295 |
| pcaec381.smc181               | -0.004918757 | 0.005553124 | 0.377296871 |
| smc180.c12                    | 0.06734445   | 0.076044792 | 0.377390668 |
| smohc161.pcaec445             | -0.026193115 | 0.029579236 | 0.377425864 |
| pcaac343.pcaac365             | -0.049565083 | 0.055973413 | 0.377432604 |
| pcaac300.alphaaminoadipicacid | -0.007602759 | 0.008585753 | 0.377433924 |
| c16.pcaec362                  | -0.015543541 | 0.017556989 | 0.377535668 |
| alanine.smohc141              | -0.040375792 | 0.045610849 | 0.377587204 |
| ornithine.leucine             | 0.017739139  | 0.020041749 | 0.377648515 |
| pcaec421.kynurenine           | 0.010953076  | 0.012375468 | 0.377673093 |
| creatinine.c10                | 0.003072118  | 0.003471723 | 0.377762465 |
| putrescine.c10                | -0.002774299 | 0.003135637 | 0.377834071 |
| pcaac405.lysopcac160          | -0.02586822  | 0.02923835  | 0.377849182 |
| pcaec386.pcaac341             | 0.008169877  | 0.00923455  | 0.377864382 |
| pcaac402.pcaec365             | 0.021140475  | 0.023897941 | 0.377914242 |
| asparagine.pcaac300           | -0.095916476 | 0.108431223 | 0.377931112 |
| pcaec384.c51dc                | -0.106796457 | 0.120735375 | 0.377949237 |
| pcaec423.lysopcac280          | -0.010486536 | 0.011857252 | 0.3780306   |
| pcaec384.lysopcac161          | 0.076423688  | 0.086416987 | 0.378051554 |
| pcaec382.transhydroxyproline  | 0.071837437  | 0.081232641 | 0.378060984 |
| c14.pcaec425                  | 0.00966286   | 0.010926712 | 0.37806546  |
| c51.lysopcac180               | 0.043935173  | 0.04968399  | 0.378087689 |
| pcaac425.pcaac383             | 0.005342227  | 0.00604152  | 0.378109315 |
| pcaec363.c51                  | 0.059894175  | 0.067737244 | 0.378130181 |
| lysine.smc180                 | -0.009386947 | 0.010616772 | 0.378157792 |
| pcaac421.pcaec322             | 0.082095799  | 0.092863033 | 0.378216676 |
| pcaec406.pcaac426             | -0.098289393 | 0.11118315  | 0.378228046 |
| c141.pcaac405                 | -0.06183637  | 0.069949871 | 0.378239665 |
| lysopcac140.smohc241          | 0.058994684  | 0.066775612 | 0.378526579 |
| c14.pcaec380                  | -0.043564653 | 0.049318953 | 0.37860824  |
| smc181.pcaac420               | -0.067322787 | 0.076223762 | 0.378661553 |
| pcaec363.leucine              | -0.010195431 | 0.011543466 | 0.378664111 |
| smc240.pcaec360               | -0.011583064 | 0.013116095 | 0.378719351 |
| glycine.pcaec385              | -0.043399123 | 0.049149902 | 0.378785707 |

|                                 |              |             |             |
|---------------------------------|--------------|-------------|-------------|
| serotonin.lysopcac182           | -0.054196813 | 0.061379791 | 0.378796593 |
| prolinr.pcaac383                | 0.023087025  | 0.026151216 | 0.378875686 |
| pcaec422.pcaac422               | -0.030282341 | 0.034305065 | 0.378924831 |
| pcaec403.pcaac323               | -0.076618284 | 0.086807888 | 0.378988273 |
| c18.alanine                     | 0.012688406  | 0.01437617  | 0.378998528 |
| pcaac404.c51                    | 0.030671991  | 0.034752407 | 0.379005938 |
| asymmetricdimethylarginine.c0   | -0.002460802 | 0.002788973 | 0.379142595 |
| pcaac240.smc181                 | -0.00630547  | 0.007147888 | 0.379243816 |
| pcaac403.c142                   | 0.033992844  | 0.038534706 | 0.379248507 |
| c181.c0                         | 0.001165284  | 0.001321073 | 0.379281756 |
| pcaac321.pcaec322               | 0.063374152  | 0.071858291 | 0.379358131 |
| pcaec361.pcaec342               | 0.12501998   | 0.141758074 | 0.379362135 |
| pcaac362.lysopcac181            | 0.022596236  | 0.025622416 | 0.379379206 |
| c10.pcaec425                    | -0.031096304 | 0.035267925 | 0.379474577 |
| pcaec321.alanine                | -0.014121895 | 0.016016959 | 0.379492053 |
| pcaec342.pcaec322               | 0.099272919  | 0.112598678 | 0.379508902 |
| c10.prolinr                     | -0.047511081 | 0.053908684 | 0.379685422 |
| pcaec342.pcaec425               | 0.002708407  | 0.003073259 | 0.379708835 |
| pcaac402.c101                   | 0.045362493  | 0.051473463 | 0.379710204 |
| c18.glutamine                   | 0.021175301  | 0.024032546 | 0.3798018   |
| c182.lysopcac203                | -0.016427912 | 0.018645197 | 0.379817557 |
| pcaac323.pcaec425               | 0.003641375  | 0.004133457 | 0.379886964 |
| c4.c0                           | -0.001009237 | 0.001145663 | 0.379904155 |
| isoleucine.c4                   | 0.034568412  | 0.039243959 | 0.37993658  |
| creatinine.lysopcac160          | 0.010946091  | 0.012426859 | 0.379946365 |
| c10.pcaac341                    | 0.007472774  | 0.008483871 | 0.379957163 |
| prolinr.glutamicacid            | -0.0628929   | 0.07140548  | 0.379976562 |
| c0.pcaac402                     | -0.048303473 | 0.054844849 | 0.38000671  |
| pcaac341.c162                   | -0.068881825 | 0.078213393 | 0.380027496 |
| pcaac320.smc180                 | -0.008314535 | 0.009441768 | 0.380070019 |
| c51dc.leucine                   | -0.023797183 | 0.027028234 | 0.380153996 |
| lysopcac280.smohc161            | -0.011294013 | 0.012828411 | 0.380189501 |
| pcaec405.pcaac384               | 0.047930307  | 0.054457866 | 0.380327152 |
| c0.h1                           | 0.005503958  | 0.006253644 | 0.380335454 |
| ornithine.asymmetricdimethylarg | 0.01590026   | 0.018072388 | 0.380503164 |
| pcaac366.tryptophan             | -0.038185576 | 0.043402542 | 0.380508078 |
| pcaec402.asparagine             | 0.009382202  | 0.010665405 | 0.380570167 |
| methionine.smc181               | 0.01035125   | 0.011767737 | 0.3806003   |
| pcaac421.lysopcac160            | -0.017436307 | 0.019825447 | 0.38067503  |
| pcaac405.pcaac361               | 0.144784358  | 0.164628156 | 0.380690336 |
| c0.asparagine                   | 0.013402424  | 0.015239792 | 0.380704773 |
| pcaec421.pcaec362               | 0.010868202  | 0.012358157 | 0.380705145 |
| pcaac365.c10                    | -0.003737192 | 0.004249807 | 0.380735562 |

|                               |              |             |             |
|-------------------------------|--------------|-------------|-------------|
| pcaec322.pcaec425             | 0.003324208  | 0.003780328 | 0.380754631 |
| pcaac360.valine               | -0.047829616 | 0.05440017  | 0.380822548 |
| lysopcac182.pcaac422          | -0.013377444 | 0.015216258 | 0.38085686  |
| pcaec380.smc180               | -0.007325686 | 0.008333984 | 0.380932994 |
| pcaec365.smohc161             | 0.031933137  | 0.03632942  | 0.380946677 |
| pcaec444.pcaac424             | 0.015720084  | 0.017885765 | 0.380985808 |
| lysopcac170.glutamicacid      | 0.035445073  | 0.040335702 | 0.381074463 |
| pcaec401.glycine              | 0.033104395  | 0.037677088 | 0.38113781  |
| pcaac425.pcaac363             | -0.013171974 | 0.014991449 | 0.381139003 |
| c181.serine                   | 0.025275153  | 0.028769106 | 0.381182538 |
| pcaec360.c51dc                | 0.133833676  | 0.152352472 | 0.381238867 |
| c2.pcaec425                   | 0.004014987  | 0.004570667 | 0.381251224 |
| pcaac405.c51                  | 0.027857704  | 0.031719742 | 0.381348454 |
| lysopcac203.c102              | -0.031580325 | 0.035960324 | 0.381373247 |
| pcaec401.asparticacid         | 0.03523733   | 0.040130447 | 0.38144322  |
| serotonin.serine              | 0.037901915  | 0.043173443 | 0.381535616 |
| lysopcac280.pcaec322          | -0.050623045 | 0.057680252 | 0.381670474 |
| lysine.h1                     | 0.003540919  | 0.004034593 | 0.38167579  |
| pcaec363.pcaec425             | 0.002742273  | 0.003124846 | 0.381713137 |
| smohc241.pcaec403             | -0.014856794 | 0.016930919 | 0.381754122 |
| methioninesulfoxide.pcaec445  | -0.107060111 | 0.1220314   | 0.381850851 |
| c142.glycine                  | -0.022545642 | 0.025698588 | 0.381853851 |
| smc181.transhydroxyproline    | 0.025446455  | 0.029007807 | 0.381898617 |
| smc181.asparagine             | 0.016976423  | 0.019353175 | 0.381918771 |
| alphaaminoadipicacid.pcaec425 | -0.002758818 | 0.003145156 | 0.381933062 |
| smc240.c162                   | 0.082381998  | 0.093922246 | 0.381951671 |
| asparagine.pcaec385           | 0.058612348  | 0.066827756 | 0.381986218 |
| lysopcac140.pcaac363          | 0.012996878  | 0.014818907 | 0.381996455 |
| smohc221.kynurenine           | -0.003999908 | 0.00456078  | 0.382009615 |
| lysopcac204.smc161            | -0.081828748 | 0.093304044 | 0.382015513 |
| pcaec386.leucine              | -0.007603383 | 0.008670053 | 0.382037709 |
| pcaac344.valine               | 0.058369166  | 0.066558105 | 0.382040543 |
| c141oh.smohc161               | 0.007480931  | 0.008530649 | 0.382050367 |
| lysopcac170.c141              | 0.017366068  | 0.019804636 | 0.382092896 |
| pcaec401.pcaac381             | -0.063235951 | 0.072121853 | 0.382133843 |
| smc261.pcaac363               | -0.007373261 | 0.008409404 | 0.382136904 |
| pcaac404.pcaec421             | 0.00114423   | 0.001305108 | 0.382166975 |
| lysopcac140.pcaac344          | 0.06479128   | 0.073917099 | 0.382271027 |
| pcaec445.c0                   | 0.000319865  | 0.000364962 | 0.382328898 |
| pcaec343.spermidine           | -0.063332891 | 0.072262469 | 0.382331271 |
| c10.tyrosine                  | 0.068179921  | 0.077825554 | 0.382530415 |
| smc202.pcaac425               | -0.070223206 | 0.080161769 | 0.382553264 |
| asymmetricdimethylarginine.h1 | -0.001076659 | 0.001229079 | 0.382569853 |

|                                |              |             |             |
|--------------------------------|--------------|-------------|-------------|
| pcaac406.smc181                | 0.019905341  | 0.022730719 | 0.382724702 |
| pcaec421.smc161                | -0.106706128 | 0.121857231 | 0.382744803 |
| pcaac403.c101                  | 0.06425214   | 0.073379904 | 0.382774958 |
| pcaac364.pcaec360              | -0.00431942  | 0.004933659 | 0.382834043 |
| methionine.pcaac402            | -0.032853018 | 0.037534456 | 0.382955561 |
| pcaec360.lysopcac203           | 0.026086902  | 0.02981     | 0.383048002 |
| c141oh.c10                     | -0.005591074 | 0.006389916 | 0.383114018 |
| pcaec383.pcaec444              | -0.171903872 | 0.196472539 | 0.383131813 |
| pcaac240.phenylalanine         | 0.069899252  | 0.079892434 | 0.383150302 |
| c101.c0                        | -0.00095412  | 0.001090791 | 0.383265748 |
| pcaac360.pcaec425              | 0.003660125  | 0.004184857 | 0.383315948 |
| pcaec404.pcaec362              | 0.008709042  | 0.009958322 | 0.383349796 |
| pcaec421.pcaec361              | 0.010449164  | 0.011948291 | 0.383359076 |
| pcaac420.pcaac281              | 0.001918156  | 0.002193565 | 0.383405316 |
| pcaec360.asparagine            | 0.011590984  | 0.01325587  | 0.383428611 |
| pcaac300.lysopcac181           | 0.035265876  | 0.040333224 | 0.38345083  |
| pcaec321.pcaac380              | 0.095955205  | 0.109767782 | 0.38355796  |
| glycine.c141oh                 | 0.084855862  | 0.097075631 | 0.383582006 |
| pcaec383.creatinine            | -0.009699565 | 0.011099198 | 0.383703177 |
| arginine.pcaec365              | -0.020702578 | 0.023691168 | 0.383727991 |
| pcaac421.putrescine            | -0.036144768 | 0.041371461 | 0.383829953 |
| pcaac364.phenylalanine         | 0.049075538  | 0.056175301 | 0.383857164 |
| pcaac300.lysopcac204           | -0.015822294 | 0.018113365 | 0.383911053 |
| serine.pcaec421                | 0.002500065  | 0.002862297 | 0.3839479   |
| c18.lysopcac180                | -0.066595768 | 0.0762507   | 0.383984769 |
| pcaec341.h1                    | 0.001375198  | 0.001574643 | 0.384006444 |
| phenylalanine.smc161           | 0.068241628  | 0.078150058 | 0.384075098 |
| pcaac343.smc180                | -0.005776476 | 0.006616006 | 0.384133024 |
| pcaac344.pcaac322              | -0.102713863 | 0.11764966  | 0.384164283 |
| pcaac421.alanine               | -0.011027135 | 0.012633328 | 0.384266345 |
| pcaac321.pcaec425              | 0.007575052  | 0.008678587 | 0.38427542  |
| lysopcac203.smc161             | -0.097823387 | 0.112091493 | 0.384348071 |
| smohc141.smc161                | 0.10381476   | 0.118966575 | 0.38438726  |
| c102.pcaec342                  | 0.065710421  | 0.075336395 | 0.384610748 |
| asymmetricdimethylarginine.pca | -0.073771177 | 0.084580818 | 0.384626671 |
| alphaaminoadipicacid.serine    | 0.017165398  | 0.019682197 | 0.384664352 |
| smc181.spermidine              | 0.062082777  | 0.07118842  | 0.384684576 |
| c3.arginine                    | -0.045863592 | 0.052590406 | 0.38468483  |
| pcaac343.spermidine            | -0.061246936 | 0.070230313 | 0.384686778 |
| pcaec386.c141                  | -0.033110249 | 0.037967958 | 0.384702662 |
| pcaac344.smc160                | 0.056328983  | 0.064605281 | 0.38479142  |
| asparticacid.pcaec360          | -0.005464326 | 0.006267296 | 0.384799592 |
| smc181.ornithine               | 0.072468317  | 0.083130494 | 0.384874452 |

|                                |              |             |             |
|--------------------------------|--------------|-------------|-------------|
| smohc161.pcaac362              | -0.024162729 | 0.027722176 | 0.384949922 |
| pcaac360.pcaac403              | -0.017208754 | 0.019744129 | 0.384957787 |
| acetylornithoine.pcaac446      | -0.017168428 | 0.019699193 | 0.384989839 |
| pcaac421.valine                | -0.029124078 | 0.033417762 | 0.384997775 |
| pcaac381.pcaac321              | 0.025760666  | 0.029559672 | 0.385016693 |
| pcaac446.c0                    | 0.000324239  | 0.000372099 | 0.385071727 |
| pcaac341.pcaac300              | 0.125400784  | 0.143919404 | 0.385100266 |
| pcaac361.valine                | -0.049577046 | 0.056911909 | 0.385213111 |
| pcaac342.pcaac322              | 0.054099699  | 0.06210704  | 0.385238731 |
| pcaac422.c3                    | -0.062875683 | 0.072199045 | 0.38535085  |
| spermidine.c2                  | 0.268009973  | 0.307777503 | 0.385391419 |
| pcaac363.c51dc                 | -0.1244784   | 0.142963396 | 0.385440453 |
| pcaac383.lysopcac181           | 0.02668066   | 0.030643311 | 0.385449465 |
| glutamine.pcaac321             | -0.012658135 | 0.014539075 | 0.385479953 |
| lysopcac161.pcaac386           | 0.00907279   | 0.010421008 | 0.385481919 |
| pcaac426.glutamicacid          | 0.060908121  | 0.069963658 | 0.385512957 |
| pcaac341.spermidine            | -0.063682217 | 0.073151272 | 0.385519942 |
| smohc222.pcaac343              | -0.0784364   | 0.090108793 | 0.385569922 |
| lysopcac281.pcaac421           | 0.003278935  | 0.003766907 | 0.385572744 |
| pcaac341.pcaac301              | -0.068984336 | 0.079259357 | 0.38562506  |
| serotonin.c0                   | 0.000783066  | 0.000899842 | 0.385699033 |
| pcaac386.c141                  | -0.035966312 | 0.041332634 | 0.385731008 |
| pcaac444.lysopcac160           | -0.010822909 | 0.012439448 | 0.385796392 |
| pcaac321.pcaac404              | 0.03001778   | 0.034509768 | 0.385912417 |
| pcaac344.pcaac401              | 0.09206856   | 0.105849563 | 0.38592796  |
| pcaac364.h1                    | 0.001084696  | 0.001247109 | 0.385948624 |
| smc160.pcaac361                | 0.06026977   | 0.069303704 | 0.386014353 |
| pcaac300.lysine                | -0.072662518 | 0.083561887 | 0.386058943 |
| lysopcac170.smohc141           | -0.022815606 | 0.026240154 | 0.386098834 |
| pcaac281.pcaac385              | -0.053640777 | 0.061697475 | 0.386140236 |
| pcaac342.pcaac381              | 0.035051554  | 0.040320355 | 0.38618904  |
| methionine.pcaac420            | 0.048329188  | 0.055594426 | 0.386194144 |
| pcaac385.pcaac360              | 0.042612867  | 0.049026936 | 0.386272944 |
| isoleucine.pcaac425            | -0.09012838  | 0.103713515 | 0.386359959 |
| pcaac421.pcaac422              | 0.077402326  | 0.089082185 | 0.386428728 |
| c181.taurine                   | -0.060641166 | 0.069791812 | 0.386428822 |
| asymmetricdimethylarginine.pca | -0.089384547 | 0.102877975 | 0.386453941 |
| c101.creatinine                | 0.005743555  | 0.00661138  | 0.386509972 |
| pcaac384.threonine             | -0.039576473 | 0.045557039 | 0.386517675 |
| lysopcac280.lysopcac161        | 0.099113841  | 0.1141067   | 0.386581392 |
| lysopcac204.smc180             | -0.012007678 | 0.013825232 | 0.386621234 |
| serine.pcaac422                | -0.03006188  | 0.034616025 | 0.386673221 |
| c4.ornithine                   | 0.044225393  | 0.050934416 | 0.386758901 |

|                                 |              |             |             |
|---------------------------------|--------------|-------------|-------------|
| pcaac380.c141oh                 | -0.101583018 | 0.116993618 | 0.386760459 |
| pcaec321.pcaec362               | 0.026066372  | 0.030035957 | 0.387000131 |
| pcaec322.histidine              | -0.065264251 | 0.075206867 | 0.387023303 |
| pcaec340.c5                     | 0.008177207  | 0.009424243 | 0.387088005 |
| pcaac426.pcaac403               | -0.02042387  | 0.02355181  | 0.387354832 |
| pcaec322.smohc141               | 0.015218691  | 0.017550182 | 0.3873745   |
| isoleucine.tyrosine             | 0.072026771  | 0.083064789 | 0.387394903 |
| pcaec385.lysopcac180            | -0.049268293 | 0.056824466 | 0.387443758 |
| pcaec385.smohc141               | -0.050991396 | 0.058820974 | 0.387517296 |
| asymmetricdimethylarginine.alar | 0.024173496  | 0.027889612 | 0.38759108  |
| alphaaminoadipicacid.pcaec362   | -0.013804852 | 0.015928438 | 0.387632955 |
| pcaac365.isoleucine             | 0.031653339  | 0.036523288 | 0.387642664 |
| serine.smohc222                 | -0.007052679 | 0.00813937  | 0.387736724 |
| pcaec383.pcaec362               | 0.010121082  | 0.011681685 | 0.387782393 |
| pcaac240.lysopcac280            | -0.041243052 | 0.047608511 | 0.387842605 |
| pcaac281.pcaec402               | -0.048315747 | 0.05577637  | 0.38787284  |
| lysine.pcaec406                 | -0.00989275  | 0.011421798 | 0.387933731 |
| smohc221.pcaec424               | 0.020546543  | 0.023722563 | 0.387939635 |
| smohc222.pcaac406               | -0.029168822 | 0.033677845 | 0.387942422 |
| pcaec300.c10                    | -0.002006565 | 0.002317078 | 0.388009877 |
| pcaac426.c51                    | 0.05768178   | 0.06661061  | 0.388028891 |
| smohc161.histidine              | -0.053753799 | 0.062081395 | 0.388080694 |
| c3.pcaac323                     | 0.068609626  | 0.079240845 | 0.388093491 |
| pcaec361.c162                   | -0.083837242 | 0.096828927 | 0.388097951 |
| pcaac343.methionine             | -0.029952277 | 0.034594709 | 0.388110691 |
| pcaac386.pcaac320               | 0.036355848  | 0.041991089 | 0.388113995 |
| isoleucine.serotonin            | 0.094182865  | 0.108802078 | 0.388203808 |
| lysopcac182.pcaac406            | -0.028479328 | 0.032901997 | 0.388233473 |
| pcaec422.pcaac426               | 0.081605459  | 0.094281992 | 0.388252013 |
| lysopcac182.pcaac322            | 0.084821583  | 0.098022615 | 0.388372266 |
| lysopcac204.taurine             | 0.054963026  | 0.063519704 | 0.388391786 |
| creatinine.prolinr              | 0.036467774  | 0.042146113 | 0.388403163 |
| pcaec381.pcaac383               | 0.013408798  | 0.015497002 | 0.388413572 |
| pcaac361.pcaec425               | 0.002564669  | 0.00296414  | 0.388423989 |
| c10.pcaec341                    | -0.062562938 | 0.072309884 | 0.388438306 |
| pcaec401.smc161                 | -0.076439025 | 0.088349894 | 0.3884496   |
| putrescine.histidine            | -0.05664675  | 0.065477673 | 0.388479389 |
| pcaac404.pcaec424               | 0.007450445  | 0.008612079 | 0.388487596 |
| pcaec444.smohc141               | -0.03691868  | 0.042678615 | 0.388529403 |
| c51.c5                          | -0.005816789 | 0.006725232 | 0.388594585 |
| pcaac320.alanine                | -0.011335914 | 0.013107436 | 0.388635132 |
| phenylalanine.c14               | 0.037812416  | 0.043725407 | 0.388676767 |
| lysopcac280.pcaac406            | -0.042486141 | 0.049143904 | 0.388810668 |



|                                |              |             |             |
|--------------------------------|--------------|-------------|-------------|
| c4.methioninesulfoxide         | 0.018771002  | 0.021713769 | 0.388838333 |
| c142.pcaac281                  | 0.001359854  | 0.001573099 | 0.388855901 |
| pcaec420.smohc161              | 0.014248331  | 0.016488154 | 0.389012896 |
| pcaac321.pcaac381              | 0.021481891  | 0.024860304 | 0.389041066 |
| smc260.alanine                 | -0.018765011 | 0.021719315 | 0.38911011  |
| pcaec385.serine                | -0.076122822 | 0.08810885  | 0.389118104 |
| pcaac404.pcaac321              | 0.034700456  | 0.040167552 | 0.389156791 |
| pcaec363.arginine              | -0.043501112 | 0.05035586  | 0.389167116 |
| pcaac322.creatinine            | -0.009038313 | 0.010464699 | 0.389264811 |
| lysopcac170.pcaac403           | -0.008744871 | 0.01012498  | 0.389266352 |
| pcaac424.pcaac381              | 0.04538392   | 0.05254952  | 0.389294622 |
| pcaec362.pcaac425              | 0.003421889  | 0.003962276 | 0.389307679 |
| pcaec423.pcaac425              | 0.003648927  | 0.004225339 | 0.389326861 |
| smohc222.leucine               | -0.012738713 | 0.014751556 | 0.389344187 |
| c182.pcaac425                  | 0.006545507  | 0.007581388 | 0.389445602 |
| alphaaminoadipicacid.pcaac323  | 0.113018593  | 0.130922357 | 0.389509312 |
| pcaac405.c10                   | -0.004638936 | 0.005373941 | 0.389520862 |
| pcaac363.creatinine            | -0.00526134  | 0.006095338 | 0.389550091 |
| histidine.pcaac343             | -0.016739821 | 0.019395037 | 0.389591937 |
| pcaac360.isoleucine            | 0.032678098  | 0.037862641 | 0.389607533 |
| pcaac425.pcaac301              | 0.057461797  | 0.066581141 | 0.389627017 |
| pcaac320.pcaac420              | -0.081674965 | 0.094645923 | 0.389671571 |
| smohc141.pcaac423              | -0.009753037 | 0.011302147 | 0.389680425 |
| c142.c5                        | -0.00562863  | 0.006522703 | 0.389684555 |
| c51.ornithine                  | -0.021227324 | 0.024600234 | 0.38970536  |
| smohc141.pcaec362              | 0.014718464  | 0.01705765  | 0.389719211 |
| serine.pcaec425                | -0.002444228 | 0.00283275  | 0.389729978 |
| pcaac322.pcaac380              | 0.037093179  | 0.042989834 | 0.389735547 |
| asymmetricdimethylarginine.pca | 0.007080225  | 0.008205824 | 0.389739251 |
| pcaac361.pcaec342              | 0.109719757  | 0.127163851 | 0.389743291 |
| pcaac404.pcaec446              | -0.037089979 | 0.04299046  | 0.389783204 |
| smc180.pcaac281                | 0.002289856  | 0.002654414 | 0.389832049 |
| pcaac342.pcaac383              | -0.007689148 | 0.008914041 | 0.389871302 |
| pcaac363.pcaac406              | -0.035912377 | 0.041636021 | 0.389902474 |
| pcaac401.smohc161              | 0.020837332  | 0.024161024 | 0.389954891 |
| smohc161.pcaac323              | -0.090756751 | 0.105247086 | 0.390017941 |
| pcaac380.pcaac403              | -0.008299885 | 0.009625078 | 0.39001908  |
| pcaec421.asparagine            | 0.019637     | 0.022774534 | 0.390064992 |
| smc202.arginine                | 0.025064598  | 0.029074308 | 0.390145842 |
| pcaec360.c12                   | 0.045907198  | 0.053254082 | 0.39017138  |
| pcaac362.transhydroxyproline   | 0.021473053  | 0.024911755 | 0.390213195 |
| pcaec384.pcaec343              | -0.065347537 | 0.075825284 | 0.390294054 |
| pcaec383.pcaec363              | 0.027606859  | 0.032035778 | 0.390330455 |

|                                |              |             |             |
|--------------------------------|--------------|-------------|-------------|
| alphaaminoadipicacid.lysopcac1 | -0.050269373 | 0.058347815 | 0.390442395 |
| pcaac421.lysine                | 0.08307558   | 0.096429973 | 0.390461472 |
| pcaac344.serine                | -0.040222019 | 0.046688499 | 0.390469501 |
| pcaec384.smohc141              | -0.022203647 | 0.02577398  | 0.390481617 |
| pcaec381.creatinine            | -0.012633226 | 0.01466705  | 0.390559236 |
| pcaec365.pcaac420              | 0.057052852  | 0.066241383 | 0.390584843 |
| ornithine.c0                   | -0.001311344 | 0.001522551 | 0.390588327 |
| pcaec424.pcaec403              | 0.052956909  | 0.061492985 | 0.39064024  |
| pcaac362.pcaac426              | 0.046123903  | 0.053560884 | 0.390660636 |
| pcaec401.pcaec425              | 0.003364576  | 0.003907571 | 0.390720364 |
| prolinr.pcaec343               | -0.086125266 | 0.100027856 | 0.390735385 |
| smc260.c10                     | -0.001906016 | 0.002213762 | 0.390750537 |
| pcaec341.c8                    | -0.038346192 | 0.044539487 | 0.390770827 |
| asparagine.lysopcac180         | 0.04765005   | 0.055349152 | 0.390797649 |
| pcaac383.serine                | -0.026939164 | 0.031292929 | 0.390813411 |
| lysopcac140.isoleucine         | -0.025199243 | 0.029275187 | 0.390867916 |
| methionine.c51dc               | -0.11043669  | 0.128322761 | 0.390952908 |
| c18.threonine                  | -0.032365931 | 0.037615466 | 0.39104867  |
| pcaac421.pcaac240              | -0.020018204 | 0.023265469 | 0.391057772 |
| pcaec364.smc241                | 0.102173768  | 0.118748307 | 0.391059198 |
| c182.lysopcac182               | -0.017959341 | 0.020872708 | 0.391059614 |
| pcaec383.smc181                | -0.004555091 | 0.005294662 | 0.391117039 |
| pcaac381.smohc222              | -0.008802939 | 0.010233788 | 0.391190489 |
| pcaec362.serine                | -0.018903809 | 0.021976616 | 0.391193513 |
| smc260.c0                      | 0.000606598  | 0.000705267 | 0.391238255 |
| pcaec360.smc181                | 0.03105277   | 0.036107391 | 0.391285181 |
| pcaec425.pcaec364              | -0.011388358 | 0.013243487 | 0.39133466  |
| pcaac402.c51                   | -0.095164109 | 0.110686098 | 0.391420198 |
| pcaac322.smohc141              | 0.013020325  | 0.01514453  | 0.391435499 |
| c51.lysopcac160                | -0.037883784 | 0.044072477 | 0.391522672 |
| smc261.c0                      | 0.000301484  | 0.00035074  | 0.391529326 |
| pcaec445.pcaec341              | 0.070615757  | 0.082164121 | 0.391594981 |
| smohc141.h1                    | 0.001379443  | 0.001605178 | 0.391637164 |
| pcaac381.h1                    | 0.000973855  | 0.001133376 | 0.391702952 |
| pcaac344.pcaac281              | -0.003289084 | 0.003828175 | 0.391743043 |
| acetylmithoine.pcaec341        | 0.067903944  | 0.079037429 | 0.391765948 |
| pcaec422.pcaec425              | 0.00425199   | 0.004949536 | 0.391803443 |
| creatinine.pcaec425            | 0.040299337  | 0.046912131 | 0.39181973  |
| pcaec424.c18                   | 0.033029678  | 0.038456236 | 0.391901466 |
| smc160.serotonin               | -0.084242856 | 0.098088154 | 0.391924353 |
| pcaec342.h1                    | 0.004944609  | 0.00575745  | 0.391940356 |
| ornithine.pcaec406             | 0.006627983  | 0.007719066 | 0.392032955 |
| smc180.pcaec384                | -0.053650214 | 0.062485937 | 0.392062819 |

|                                |              |             |             |
|--------------------------------|--------------|-------------|-------------|
| glycine.c14                    | 0.040123834  | 0.046738865 | 0.392133397 |
| citruline.serotonin            | 0.043837733  | 0.051067032 | 0.392151647 |
| c141.pcaac385                  | 0.005846202  | 0.006810793 | 0.392185662 |
| asymmetricdimethylarginine.asp | -0.009284219 | 0.010818731 | 0.392302119 |
| alphaaminoadipicacid.pcaec402  | 0.030283136  | 0.035295448 | 0.392396607 |
| smohc222.pcaac384              | 0.04604594   | 0.053674453 | 0.392460125 |
| pcaec365.smohc222              | -0.004932407 | 0.005750246 | 0.392515854 |
| pcaec385.lysopcac160           | -0.011934256 | 0.013913247 | 0.392521932 |
| c3.pcaec425                    | 0.006011284  | 0.007008429 | 0.39254394  |
| acetylmithoine.pcaec402        | -0.040065307 | 0.046711553 | 0.3925466   |
| c51dc.smc180                   | 0.016901204  | 0.019705515 | 0.392562162 |
| ornithine.pcaec425             | -0.004365495 | 0.005089979 | 0.3925756   |
| pcaac405.pcaec343              | 0.097941958  | 0.114197038 | 0.392579448 |
| pcaac361.phenylalanine         | -0.034160107 | 0.039835129 | 0.392645692 |
| pcaec444.c16                   | 0.032733903  | 0.038175302 | 0.392686655 |
| pcaec423.pcaac403              | 0.040468432  | 0.047196669 | 0.392697832 |
| asparagine.pcaac383            | 0.007186075  | 0.0083818   | 0.392752783 |
| c142.pcaac323                  | -0.073436705 | 0.085666884 | 0.392811754 |
| pcaac366.smc180                | -0.00718575  | 0.008383673 | 0.392879619 |
| prolinr.pcaac385               | 0.005542541  | 0.006466676 | 0.392890432 |
| lysopcac182.smohc241           | -0.042465649 | 0.049549396 | 0.392921307 |
| c141oh.pcaac343                | -0.027260447 | 0.031809209 | 0.392942275 |
| c102.pcaec425                  | 0.00507277   | 0.00592003  | 0.393006236 |
| c5.c141oh                      | -0.169574852 | 0.197929122 | 0.393081766 |
| serine.c10                     | -0.004707578 | 0.005495238 | 0.39312601  |
| c14.c12                        | -0.07503792  | 0.087601286 | 0.393170261 |
| pcaec404.pcaec360              | -0.005941774 | 0.006936599 | 0.393171063 |
| pcaec421.smc181                | -0.004847067 | 0.005659539 | 0.393248853 |
| pcaec403.smc181                | -0.005082025 | 0.005934955 | 0.393334257 |
| pcaac405.pcaec443              | -0.04260182  | 0.049754425 | 0.393359178 |
| smohc141.pcaac240              | -0.009011201 | 0.010524332 | 0.393368196 |
| pcaac341.c51                   | 0.067196831  | 0.078484612 | 0.393394126 |
| histidine.pcaac383             | 0.03278631   | 0.038302672 | 0.39350364  |
| arginine.pcaac341              | -0.005524537 | 0.006454082 | 0.393505878 |
| smohc241.asparticacid          | 0.033135641  | 0.038711447 | 0.393511784 |
| pcaec404.smc181                | -0.005189717 | 0.006063697 | 0.393565903 |
| lysopcac160.pcaac420           | -0.078898622 | 0.092202313 | 0.393651244 |
| c51dc.pcaec363                 | -0.028351884 | 0.033137042 | 0.393715786 |
| c3.lysopcac281                 | -0.01333613  | 0.015588839 | 0.393772407 |
| smohc241.c10                   | -0.001642371 | 0.001919811 | 0.393775752 |
| c0.pcaec406                    | 0.009129156  | 0.010672576 | 0.393831784 |
| lysopcac281.isoleucine         | -0.018233951 | 0.021325698 | 0.394031489 |
| pcaac385.pcaac323              | 0.112468502  | 0.131543377 | 0.394048438 |

|                                 |              |             |             |
|---------------------------------|--------------|-------------|-------------|
| pcaec422.lysopcac160            | -0.024214672 | 0.028322133 | 0.394058516 |
| pcaac344.lysopcac161            | -0.080438207 | 0.094090918 | 0.394099749 |
| pcaec405.smohc141               | -0.018542116 | 0.021691363 | 0.394145615 |
| smc181.pcaac383                 | 0.003164708  | 0.003702833 | 0.394224777 |
| pcaec343.pcaec425               | 0.002919263  | 0.003415963 | 0.394267662 |
| lysopcac170.pcaac385            | -0.031586716 | 0.036961787 | 0.394276937 |
| pcaac406.c16                    | 0.031542035  | 0.036909802 | 0.394280758 |
| c51.methionine                  | -0.017708246 | 0.020727124 | 0.394401827 |
| pcaac366.c10                    | -0.00344948  | 0.004037934 | 0.394447574 |
| pcaec340.pcaec406               | 0.009917264  | 0.011609108 | 0.394449028 |
| pcaac401.c101                   | -0.029579708 | 0.034631416 | 0.394524374 |
| c16.alanine                     | 0.026650134  | 0.031212861 | 0.394695713 |
| pcaec362.pcaac420               | -0.065501972 | 0.076728094 | 0.394767214 |
| pcaec404.lysopcac182            | 0.03934818   | 0.046094711 | 0.394795889 |
| c2.pcaec423                     | -0.022224252 | 0.026035958 | 0.394817559 |
| pcaac425.pcaac384               | 0.055286154  | 0.064770044 | 0.394829939 |
| pcaac384.c0                     | 0.001007814  | 0.001180772 | 0.394860043 |
| pcaec383.kynurenine             | 0.007731768  | 0.009059023 | 0.394878497 |
| c0.valine                       | -0.093194634 | 0.10919585  | 0.394892267 |
| isoleucine.pcaec425             | -0.004685712 | 0.005490562 | 0.394920399 |
| pcaec425.pcaac420               | 0.06725603   | 0.078810823 | 0.394935044 |
| phenylalanine.c182              | -0.040643189 | 0.047628089 | 0.394957566 |
| smc260.pcaec365                 | 0.026477261  | 0.031027846 | 0.394961025 |
| pcaec301.pcaec425               | 0.002863179  | 0.003355293 | 0.394964718 |
| pcaec403.pcaac365               | -0.052214015 | 0.061188627 | 0.394966507 |
| pcaac343.kynurenine             | -0.008753523 | 0.010258256 | 0.394974161 |
| pcaac381.pcaec425               | 0.001678574  | 0.001967238 | 0.395002067 |
| lysopcac280.pcaac300            | -0.041497641 | 0.048634785 | 0.395009894 |
| pcaac281.pcaac343               | -0.036077678 | 0.042283966 | 0.395024597 |
| pcaec445.histidine              | -0.039990776 | 0.046873198 | 0.395054572 |
| c16.glutamicacid                | -0.064266656 | 0.075350347 | 0.395200888 |
| acetylmithoine.c0               | 0.000358544  | 0.000420449 | 0.39527784  |
| c142.lysopcac160                | 0.013020649  | 0.015271251 | 0.395355466 |
| alphaaminoadipicacid.methionine | -0.030473202 | 0.035741037 | 0.39536315  |
| pcaec383.phenylalanine          | 0.068372494  | 0.08019519  | 0.395382509 |
| asparagine.c3                   | -0.046173998 | 0.054158774 | 0.395387327 |
| smc260.pcaec403                 | -0.008996599 | 0.010553369 | 0.395432281 |
| pcaac362.pcaec380               | -0.050315872 | 0.059028776 | 0.395482208 |
| smohc141.lysopcac180            | 0.072383423  | 0.084936298 | 0.395585765 |
| c5.smc260                       | 0.051762794  | 0.060741993 | 0.39560434  |
| acetylmithoine.pcaac385         | 0.01019716   | 0.011966461 | 0.395620793 |
| glutamine.tyrosine              | -0.040249958 | 0.047238206 | 0.395665797 |
| prolinr.serotonin               | 0.034409714  | 0.040384369 | 0.395670439 |

|                       |              |             |             |
|-----------------------|--------------|-------------|-------------|
| smohc222.pcaec425     | 0.025346105  | 0.029748398 | 0.395692268 |
| pcaac405.c0           | -0.002327103 | 0.00273211  | 0.395833507 |
| c4.lysopcac281        | -0.01951489  | 0.022913144 | 0.395872625 |
| pcaac363.c51          | 0.104979558  | 0.123279152 | 0.395944565 |
| pcaac360.pcaac405     | -0.050701783 | 0.059541704 | 0.395958805 |
| pcaec402.smc181       | -0.00512125  | 0.006015023 | 0.396027486 |
| alanine.pcaec364      | 0.022303954  | 0.02620079  | 0.39610472  |
| isoleucine.pcaec406   | 0.033107855  | 0.038895008 | 0.396137583 |
| smc180.pcaac406       | -0.033487842 | 0.039343852 | 0.396166744 |
| pcaec424.pcaac384     | 0.05608268   | 0.065894184 | 0.396197786 |
| lysopcac203.smohc141  | 0.021702918  | 0.025500389 | 0.39620902  |
| c142.smohc141         | 0.028491433  | 0.033477274 | 0.396216727 |
| pcaac401.smc181       | -0.004706676 | 0.005531178 | 0.396290013 |
| pcaec404.pcaac420     | 0.086954184  | 0.102188866 | 0.396300586 |
| smohc221.arginine     | -0.034299387 | 0.040311513 | 0.396332739 |
| pcaac341.h1           | 0.001440685  | 0.001693245 | 0.396341701 |
| glutamicacid.lysine   | 0.140397092  | 0.165014089 | 0.396354616 |
| pcaac426.c2           | 0.080589945  | 0.094752465 | 0.396513771 |
| pcaec361.serine       | -0.0238825   | 0.028082564 | 0.396565086 |
| arginine.pcaac364     | -0.045857768 | 0.05393672  | 0.396689415 |
| pcaac361.creatinine   | -0.004744569 | 0.00558044  | 0.396689488 |
| c8.prolinr            | -0.043962663 | 0.051708833 | 0.396699307 |
| pcaec364.leucine      | -0.006406479 | 0.007536341 | 0.396764847 |
| pcaec363.serine       | -0.016287528 | 0.01916032  | 0.396771799 |
| pcaec322.pcaec444     | 0.118374184  | 0.139304716 | 0.396946618 |
| lysopcac280.c102      | 0.049261899  | 0.057972466 | 0.396948575 |
| c181.c3               | 0.042219557  | 0.049700025 | 0.397092014 |
| pcaec445.pcaec360     | -0.007954455 | 0.009364069 | 0.397104238 |
| pcaac343.pcaec425     | 0.002756582  | 0.003245343 | 0.397142587 |
| smc260.smc181         | 0.013133078  | 0.015463966 | 0.397212831 |
| lysopcac203.pcaac365  | -0.065102557 | 0.076665128 | 0.397262099 |
| lysopcac203.arginine  | -0.056063113 | 0.066027204 | 0.397311839 |
| ornithine.pcaec343    | -0.075532596 | 0.088960997 | 0.397333012 |
| pcaac380.c141         | -0.027546197 | 0.032446617 | 0.397379122 |
| c16.prolinr           | -0.028739932 | 0.033868271 | 0.397595374 |
| pcaec362.pcaac422     | -0.021116265 | 0.024890296 | 0.397709904 |
| alanine.pcaec425      | -0.002780574 | 0.003278176 | 0.397801802 |
| pcaec300.smc160       | 0.084946302  | 0.100149983 | 0.397811175 |
| lysopcac204.arginine  | 0.048388725  | 0.057049649 | 0.397813768 |
| pcaec340.lysopcac181  | 0.035325929  | 0.041648887 | 0.397814864 |
| smc160.pcaec406       | 0.005178556  | 0.006105564 | 0.397822813 |
| c10.leucine           | -0.009874896 | 0.011644999 | 0.397920107 |
| lysopcac160.serotonin | -0.103508631 | 0.122078723 | 0.397981319 |

|                              |              |             |             |
|------------------------------|--------------|-------------|-------------|
| c8.pcaec343                  | -0.076760764 | 0.090548467 | 0.398066268 |
| pcaec405.pcaec301            | 0.084999193  | 0.100267901 | 0.398072019 |
| pcaec340.lysopcac182         | -0.015921467 | 0.018783098 | 0.398112135 |
| c14.pcaac381                 | -0.005592209 | 0.006597601 | 0.398132186 |
| lysine.pcaac381              | 0.021838763  | 0.025765482 | 0.398140418 |
| leucine.smc160               | 0.050773851  | 0.059903986 | 0.398146233 |
| pcaec360.pcaac364            | -0.051009279 | 0.060196583 | 0.398262199 |
| smohc161.asymmetricdimethyla | 0.022348567  | 0.026373825 | 0.398263047 |
| pcaac361.isoleucine          | 0.017448229  | 0.020591506 | 0.398277483 |
| pcaec420.alanine             | -0.008907276 | 0.010514442 | 0.398390755 |
| pcaec401.smohc221            | -0.075911144 | 0.08961159  | 0.398409533 |
| pcaac363.serine              | -0.01404493  | 0.016583355 | 0.398511553 |
| pcaac361.serotonin           | -0.07915683  | 0.093466424 | 0.398527157 |
| glycine.lysopcac204          | -0.015393079 | 0.018176351 | 0.398542296 |
| c18.pcaac380                 | 0.058734519  | 0.069358366 | 0.398568543 |
| pcaec341.lysopcac280         | 0.010518406  | 0.012421442 | 0.398586604 |
| pcaec425.pcaac281            | -0.006130928 | 0.007240346 | 0.398598476 |
| c102.serine                  | 0.017850036  | 0.021082281 | 0.398647672 |
| pcaac405.lysopcac182         | -0.010451869 | 0.01234473  | 0.398657587 |
| pcaac406.lysopcac160         | 0.023277691  | 0.02749733  | 0.398725798 |
| methionine.c51               | 0.065616372  | 0.077511406 | 0.398728814 |
| pcaac362.c10                 | -0.00264391  | 0.003123253 | 0.39873648  |
| glutamicacid.lysopcac160     | 0.037466597  | 0.04426265  | 0.39877187  |
| serotonin.pcaec425           | 0.00404601   | 0.004781087 | 0.398887254 |
| glutamine.pcaec402           | -0.054394208 | 0.064285391 | 0.398952159 |
| pcaec384.pcaac240            | -0.016197654 | 0.01914359  | 0.398964764 |
| leucine.pcaec425             | -0.002959257 | 0.003497644 | 0.39898815  |
| pcaac424.pcaec362            | 0.011184355  | 0.013219528 | 0.399001308 |
| lysopcac281.serine           | -0.011518088 | 0.013617674 | 0.399128586 |
| c51dc.pcaec425               | -0.004850363 | 0.005734878 | 0.399158181 |
| pcaac404.pcaac386            | -0.030506033 | 0.036069665 | 0.399165206 |
| smohc161.h1                  | 0.001557816  | 0.001842142 | 0.399219739 |
| pcaac320.lysopcac181         | 0.033375544  | 0.039467116 | 0.399220067 |
| pcaac364.pcaac360            | 0.021111557  | 0.024965122 | 0.399226996 |
| pcaec403.pcaec421            | -0.008042042 | 0.009510532 | 0.399254087 |
| lysopcac281.serotonin        | -0.107317398 | 0.126931641 | 0.399320468 |
| pcaec444.pcaac344            | 0.058915191  | 0.069702541 | 0.399452073 |
| pcaac425.c10                 | -0.002756322 | 0.003261313 | 0.399496613 |
| c162.c0                      | -0.000527526 | 0.000624176 | 0.399497974 |
| lysine.smohc241              | 0.115199625  | 0.136339013 | 0.39961204  |
| pcaec361.pcaec425            | 0.002707727  | 0.003204682 | 0.399623968 |
| pcaac385.pcaec342            | 0.100992017  | 0.119528663 | 0.399629285 |
| h1.c51dc                     | -0.161185933 | 0.190787177 | 0.399669371 |

|                                  |              |             |             |
|----------------------------------|--------------|-------------|-------------|
| lysopcac140.histidine            | 0.055798065  | 0.066052025 | 0.399718031 |
| pcaec406.smohc241                | 0.059650774  | 0.070621068 | 0.399773455 |
| pcaac281.pcaec444                | 0.120632977  | 0.14282861  | 0.399806971 |
| isoleucine.valine                | 0.172677272  | 0.204478331 | 0.399875105 |
| pcaec380.pcaec425                | 0.003333264  | 0.003947267 | 0.399891058 |
| pcaec425.pcaec321                | 0.02499234   | 0.029597124 | 0.399908097 |
| h1.putrescine                    | -0.025982055 | 0.030770421 | 0.399926876 |
| lysopcac281.c10                  | -0.002154146 | 0.00255115  | 0.399927837 |
| pcaac322.lysopcac181             | 0.024100547  | 0.02854332  | 0.399945981 |
| c3.pcaac321                      | -0.019831327 | 0.023494188 | 0.400087846 |
| c2.pcaec340                      | 0.047706409  | 0.056527449 | 0.400167903 |
| smc202.pcaac406                  | -0.024982053 | 0.029603157 | 0.400197386 |
| smc160.smc202                    | 0.074238554  | 0.087987359 | 0.400284907 |
| pcaec301.pcaac360                | -0.032865624 | 0.038953909 | 0.400304795 |
| acetylmethionine.methioninesulfo | 0.01969319   | 0.02334378  | 0.400354505 |
| smohc221.lysopcac281             | -0.019330576 | 0.022916344 | 0.400403672 |
| smohc241.lysopcac281             | -0.016023278 | 0.018998024 | 0.400464818 |
| smc180.c18                       | 0.030704868  | 0.036405654 | 0.400469746 |
| pcaac424.lysopcac203             | 0.014327889  | 0.016989534 | 0.400510502 |
| pcaec446.isoleucine              | 0.023831876  | 0.028259897 | 0.400524642 |
| pcaac424.smc181                  | -0.005845956 | 0.00693239  | 0.400540952 |
| pcaac405.arginine                | 0.023480276  | 0.027844201 | 0.400545431 |
| c141.c10                         | -0.002231722 | 0.002646959 | 0.400627326 |
| isoleucine.smohc221              | -0.036803948 | 0.043652625 | 0.400636742 |
| pcaac343.pcaac360                | 0.040563203  | 0.048112224 | 0.400644568 |
| lysopcac204.pcaac403             | -0.003374384 | 0.004002551 | 0.400665321 |
| pcaec365.pcaac426                | 0.048143542  | 0.05711228  | 0.400718417 |
| c102.c3                          | 0.037046644  | 0.043951603 | 0.400755612 |
| c12.pcaac422                     | 0.019174194  | 0.022749359 | 0.400783956 |
| smc161.pcaac364                  | -0.042240261 | 0.050117554 | 0.40079611  |
| pcaac360.pcaec380                | -0.077798436 | 0.092309626 | 0.400810004 |
| pcaec361.pcaac364                | -0.051091038 | 0.060622724 | 0.40082579  |
| smc181.phenylalanine             | 0.045855849  | 0.054411815 | 0.400834182 |
| pcaac322.pcaec343                | 0.111290788  | 0.132106768 | 0.401015223 |
| pcaac343.putrescine              | -0.040180083 | 0.047696699 | 0.401027822 |
| pcaac322.pcaec380                | -0.053570279 | 0.063596248 | 0.401060369 |
| pcaac402.smc202                  | -0.08113546  | 0.096324991 | 0.401082743 |
| c10.c51dc                        | -0.117613004 | 0.139650348 | 0.40114591  |
| lysopcac180.glutamicacid         | 0.038369177  | 0.045571696 | 0.401282207 |
| c101.c141                        | 0.029722765  | 0.035309592 | 0.401380367 |
| smc202.pcaac321                  | 0.027893058  | 0.033148771 | 0.401561819 |
| phenylalanine.pcaec425           | -0.001770878 | 0.00210525  | 0.401717262 |
| smohc161.pcaac360                | 0.054203443  | 0.064438072 | 0.401717909 |

|                               |              |             |             |
|-------------------------------|--------------|-------------|-------------|
| pcaac366.leucine              | -0.011723071 | 0.013936855 | 0.401726261 |
| c101.lysopcac160              | 0.013579152  | 0.016145207 | 0.401777675 |
| pcaec365.pcaec405             | 0.050644321  | 0.060215537 | 0.401785094 |
| pcaac366.serotonin            | -0.09513364  | 0.113124139 | 0.40183197  |
| alphaaminoadipicacid.glycine  | 0.043733079  | 0.052012593 | 0.40191551  |
| c14.lysopcac160               | 0.020219148  | 0.024051187 | 0.401996808 |
| pcaec443.putrescine           | -0.04824452  | 0.057396425 | 0.402065126 |
| lysopcac203.serotonin         | 0.09011019   | 0.107204093 | 0.402065777 |
| pcaec402.serine               | -0.050425316 | 0.059998904 | 0.402127629 |
| pcaec403.pcaac361             | 0.043175582  | 0.051375383 | 0.402151603 |
| h1.serine                     | -0.036459988 | 0.04338779  | 0.40218851  |
| pcaec443.smohc141             | -0.022625624 | 0.026924963 | 0.402192332 |
| pcaac281.c162                 | 0.070437806  | 0.083844875 | 0.402317868 |
| pcaac421.pcaac385             | -0.054062571 | 0.064356334 | 0.402343695 |
| asparagine.pcaec422           | -0.025782752 | 0.030693082 | 0.402361655 |
| pcaec321.isoleucine           | 0.023568792  | 0.028060135 | 0.402406202 |
| pcaec386.pcaec446             | -0.063298494 | 0.075362965 | 0.402419345 |
| smc241.alanine                | -0.010195031 | 0.012139037 | 0.402452904 |
| pcaac366.pcaec425             | 0.003674041  | 0.004374761 | 0.402468712 |
| pcaec386.pcaac240             | -0.018616992 | 0.022171168 | 0.402543047 |
| c16.pcaec404                  | 0.033249972  | 0.039606744 | 0.402649773 |
| lysopcac160.smohc141          | -0.019661869 | 0.023422209 | 0.402677008 |
| smc161.tyrosine               | -0.056371588 | 0.067154342 | 0.402688648 |
| pcaac344.pcaec360             | -0.004648538 | 0.005538435 | 0.402750064 |
| pcaac425.smohc222             | 0.009128078  | 0.010876627 | 0.40279782  |
| pcaec362.pcaec364             | -0.012421937 | 0.014802874 | 0.402843007 |
| pcaec446.c3                   | -0.015668876 | 0.018672276 | 0.402845944 |
| lysopcac280.c10               | -0.002351706 | 0.002803101 | 0.402949875 |
| putrescine.pcaec403           | 0.018945336  | 0.022583604 | 0.402988028 |
| c162.serotonin                | -0.060778608 | 0.072456484 | 0.403026454 |
| serotonin.lysopcac170         | -0.013333851 | 0.015896404 | 0.403044583 |
| c4.smc180                     | 0.016645981  | 0.019846123 | 0.403069405 |
| smc161.smc160                 | -0.11647552  | 0.138870076 | 0.403077772 |
| pcaec425.smc180               | -0.008732482 | 0.010411711 | 0.403088998 |
| c0.pcaec425                   | 0.006874472  | 0.008197606 | 0.403157345 |
| c8.glycine                    | 0.038260277  | 0.045633161 | 0.403248899 |
| c5.pcaac322                   | 0.083950317  | 0.100128026 | 0.403249843 |
| pcaec322.pcaac322             | -0.053608465 | 0.063942007 | 0.403270991 |
| pcaac404.methionine           | -0.041697584 | 0.049736372 | 0.403282131 |
| pcaac405.pcaac402             | -0.041796058 | 0.049856261 | 0.403305005 |
| methioninesulfoxide.histidine | 0.094534964  | 0.112765759 | 0.403305431 |
| c0.c101                       | 0.01720119   | 0.020521215 | 0.403369991 |
| pcaac406.pcaac404             | -0.010614955 | 0.012664502 | 0.403397405 |



|                                     |              |             |             |
|-------------------------------------|--------------|-------------|-------------|
| c5.pcaec425                         | -0.011043088 | 0.013178107 | 0.403497373 |
| pcaec341.smc240                     | -0.021391629 | 0.025527616 | 0.403501579 |
| c141.taurine                        | -0.02531263  | 0.030211197 | 0.403570988 |
| pcaac360.serine                     | 0.051116132  | 0.061009536 | 0.403580774 |
| smc161.pcaac421                     | -0.023085437 | 0.027555539 | 0.403611786 |
| lysopcac140.c0                      | -0.00349772  | 0.004176028 | 0.403730428 |
| pcaac401.pcaec425                   | 0.003643031  | 0.004349679 | 0.403747678 |
| pcaac406.acetylmethionine           | -0.024219422 | 0.028919524 | 0.403783378 |
| pcaec300.pcaec342                   | -0.106132438 | 0.126733407 | 0.403800223 |
| pcaac421.asymmetricdimethylarginine | 0.021958586  | 0.026221705 | 0.403814897 |
| pcaec340.c10                        | -0.00190887  | 0.002279475 | 0.403816927 |
| pcaec342.pcaec341                   | 0.124908509  | 0.149161257 | 0.403822943 |
| methionine.pcaec443                 | 0.038292137  | 0.045727274 | 0.403824776 |
| lysopcac140.pcaac380                | 0.038745018  | 0.0462685   | 0.403828933 |
| smc160.threonine                    | -0.047438766 | 0.05665193  | 0.40384164  |
| lysine.pcaac343                     | -0.018677225 | 0.022305658 | 0.403864686 |
| pcaac344.pcaac380                   | 0.032916893  | 0.039312396 | 0.403873324 |
| pcaac381.pcaec360                   | -0.003898836 | 0.004656538 | 0.403892251 |
| pcaac360.smc180                     | -0.006268311 | 0.007486554 | 0.403895718 |
| lysopcac181.pcaac365                | 0.05243263   | 0.062624869 | 0.40391059  |
| c101.smohc241                       | -0.054040232 | 0.064545764 | 0.403916368 |
| lysopcac181.pcaac384                | 0.050537295  | 0.060363834 | 0.403931791 |
| h1.lysopcac180                      | 0.110631954  | 0.132144833 | 0.403936949 |
| pcaec446.leucine                    | -0.004421704 | 0.005281779 | 0.403959587 |
| pcaec404.pcaec321                   | 0.04208826   | 0.050275557 | 0.40396535  |
| citruline.c12                       | -0.037329203 | 0.044592909 | 0.403988209 |
| pcaec321.smc260                     | 0.023728412  | 0.028349182 | 0.404047347 |
| pcaac364.proline                    | 0.04503215   | 0.053802287 | 0.404054028 |
| pcaec446.pcaec404                   | -0.00720121  | 0.008603868 | 0.404065093 |
| smc260.smc180                       | 0.009910273  | 0.011841279 | 0.404091765 |
| glutamine.pcaec403                  | -0.038367705 | 0.045843631 | 0.404091943 |
| c4.pcaec425                         | 0.006535357  | 0.007809084 | 0.404110939 |
| c102.pcaac320                       | -0.067815814 | 0.081033951 | 0.404116619 |
| c12.pcaac403                        | 0.005094162  | 0.006087263 | 0.404130909 |
| smc260.smohc141                     | -0.011829246 | 0.014135353 | 0.404131234 |
| leucine.transhydroxyproline         | -0.038022503 | 0.045435305 | 0.40413466  |
| pcaac422.pcaec425                   | 0.00240925   | 0.002879    | 0.404142245 |
| smc202.smohc241                     | -0.089944683 | 0.107488029 | 0.404169047 |
| pcaac402.pcaec321                   | 0.050090172  | 0.059868557 | 0.404235607 |
| pcaac424.pcaec340                   | -0.052421623 | 0.062661462 | 0.404282877 |
| pcaac421.pcaec425                   | 0.005890441  | 0.007041068 | 0.40428367  |
| asparagine.pcaac240                 | -0.017704966 | 0.021163818 | 0.40429246  |
| pcaec321.lysopcac204                | -0.020204815 | 0.024152493 | 0.404301262 |

|                       |              |             |             |
|-----------------------|--------------|-------------|-------------|
| pcaec384.pcaec364     | -0.022175644 | 0.026508442 | 0.40430219  |
| lysopcac170.c16       | 0.033518981  | 0.04006819  | 0.404303233 |
| citruiline.pcaac385   | 0.006985577  | 0.008351546 | 0.404363298 |
| lysopcac203.pcaac360  | 0.028594228  | 0.034191294 | 0.404441648 |
| smc180.histidine      | -0.04967812  | 0.059404375 | 0.404459047 |
| smc241.c102           | 0.024536997  | 0.029343744 | 0.404503124 |
| pcaac404.pcaac320     | -0.041476799 | 0.04961632  | 0.404638233 |
| c14.c182              | -0.036549866 | 0.043725987 | 0.404675479 |
| pcaac320.smc181       | -0.010813277 | 0.012937455 | 0.404716138 |
| pcaec443.tyrosine     | -0.051254818 | 0.061328509 | 0.40475521  |
| pcaac405.pcaac364     | -0.058099961 | 0.069525064 | 0.404796043 |
| pcaec423.c141         | 0.039160688  | 0.046871126 | 0.40489264  |
| pcaac365.c0           | 0.000552033  | 0.000660745 | 0.404907114 |
| lysopcac140.pcaac360  | 0.045051756  | 0.053924468 | 0.404913211 |
| smc240.smohc241       | 0.04775509   | 0.057171694 | 0.405007342 |
| c0.c102               | -0.022534665 | 0.026979552 | 0.405031324 |
| c102.leucine          | -0.009502161 | 0.011376488 | 0.405033676 |
| lysopcac160.pcaec444  | -0.160087845 | 0.191669781 | 0.405043912 |
| citruiline.pcaac384   | 0.068792911  | 0.082369965 | 0.405076177 |
| isoleucine.smohc222   | -0.004316124 | 0.005168232 | 0.405100842 |
| pcaec405.pcaec425     | 0.005782393  | 0.006924409 | 0.405129988 |
| pcaec363.pcaec423     | -0.016380921 | 0.019623934 | 0.405316252 |
| asparticacid.pcaac404 | 0.010858266  | 0.013008281 | 0.405328833 |
| pcaec384.c162         | 0.079701335  | 0.095492514 | 0.405376643 |
| smc160.smohc222       | -0.005209594 | 0.006241784 | 0.405377839 |
| pcaac384.c162         | 0.06180512   | 0.074054502 | 0.405401758 |
| pcaac386.pcaec341     | -0.065616847 | 0.078637871 | 0.405498155 |
| pcaec401.pcaac364     | -0.047482901 | 0.056927108 | 0.405676632 |
| c2.pcaac381           | -0.005178713 | 0.006210201 | 0.405786567 |
| c141.pcaec401         | -0.048207873 | 0.057810852 | 0.405794732 |
| pcaec445.pcaec382     | -0.014654279 | 0.017574461 | 0.405822961 |
| pcaec423.pcaec343     | 0.095280001  | 0.114296977 | 0.405947416 |
| smc240.pcaac385       | -0.016557609 | 0.019863184 | 0.405967085 |
| glutamicacid.pcaec423 | -0.041491819 | 0.0497757   | 0.405971046 |
| pcaec420.c4           | -0.036179155 | 0.043403959 | 0.405988313 |
| lysine.serine         | 0.027047382  | 0.032450426 | 0.406014463 |
| lysopcac170.pcaec322  | -0.052305171 | 0.062754898 | 0.406022905 |
| pcaec406.pcaac422     | -0.065625479 | 0.078737144 | 0.406027398 |
| histidine.c10         | -0.002258862 | 0.002710333 | 0.406055176 |
| pcaac404.tyrosine     | -0.067572458 | 0.081082336 | 0.406080618 |
| pcaec385.smc161       | -0.051967801 | 0.062360119 | 0.406097932 |
| pcaac422.smc180       | -0.005204342 | 0.006245535 | 0.406131598 |
| pcaac342.taurine      | -0.025109181 | 0.030132875 | 0.406136126 |

|                       |              |             |             |
|-----------------------|--------------|-------------|-------------|
| smc260.pcaac403       | 0.019345626  | 0.023216335 | 0.406139194 |
| smohc221.c8           | -0.03738573  | 0.04487237  | 0.406206334 |
| smc181.pcaec343       | -0.062201668 | 0.074658405 | 0.406210147 |
| smohc241.lysopcac203  | -0.010363396 | 0.012440727 | 0.406282342 |
| h1.pcaec425           | -0.002109702 | 0.002532599 | 0.406284215 |
| c141oh.pcaec365       | -0.023557436 | 0.028279831 | 0.406287876 |
| lysopcac281.pcaec341  | 0.066467998  | 0.079795836 | 0.406308195 |
| pcaec381.pcaac426     | 0.080864104  | 0.097079114 | 0.406310776 |
| c10.pcaec380          | 0.058854605  | 0.070663201 | 0.40635695  |
| smc241.leucine        | -0.005448961 | 0.006543258 | 0.40642971  |
| c141oh.smohc141       | 0.01531267   | 0.018389159 | 0.406462677 |
| pcaec405.smc181       | -0.008522622 | 0.010237174 | 0.406566057 |
| lysopcac140.smc161    | 0.093755807  | 0.112618984 | 0.406573134 |
| pcaec402.pcaac385     | -0.015475308 | 0.0185899   | 0.406599365 |
| asparagine.pcaac363   | -0.008670984 | 0.010416596 | 0.406620539 |
| smc261.smc202         | -0.057172426 | 0.068686905 | 0.406652781 |
| serotonin.lysopcac280 | 0.017242513  | 0.02071999  | 0.406762344 |
| c102.pcaec363         | -0.022177994 | 0.026655712 | 0.406847524 |
| pcaec363.pcaec385     | -0.064606163 | 0.077651036 | 0.406853206 |
| smc181.pcaac406       | -0.024933574 | 0.029970624 | 0.406894094 |
| pcaec385.smc181       | 0.02120289   | 0.02548777  | 0.40692159  |
| pcaac380.c0           | 0.000404121  | 0.000485887 | 0.407015521 |
| pcaac240.pcaec425     | 0.004715448  | 0.00566962  | 0.40702313  |
| pcaac386.pcaac404     | -0.00956885  | 0.011505211 | 0.407027272 |
| pcaac364.pcaec343     | -0.066096481 | 0.079474984 | 0.407045874 |
| pcaec321.c102         | 0.022818748  | 0.027438261 | 0.407059509 |
| c101.pcaec385         | -0.02520197  | 0.030305031 | 0.407076192 |
| pcaec424.pcaac386     | 0.022115299  | 0.026595354 | 0.407111438 |
| pcaec300.pcaec362     | 0.020186297  | 0.024275908 | 0.407117749 |
| c101.smc180           | 0.0166771    | 0.020056523 | 0.407135305 |
| asparagine.pcaec382   | 0.014485167  | 0.017421096 | 0.407153445 |
| pcaac406.ornithine    | 0.014669957  | 0.017643811 | 0.407165935 |
| smohc221.pcaec364     | -0.020028299 | 0.024092064 | 0.407237467 |
| pcaac362.pcaec422     | -0.017738812 | 0.021338212 | 0.407241297 |
| pcaec402.pcaac321     | 0.018663302  | 0.022451325 | 0.407262829 |
| pcaac364.smc180       | -0.020376893 | 0.024515052 | 0.407307402 |
| pcaec446.pcaec403     | 0.025833175  | 0.031087529 | 0.407429736 |
| pcaac342.glycine      | 0.037392535  | 0.045002989 | 0.407481478 |
| citruline.pcaec443    | -0.032190366 | 0.03874251  | 0.407487282 |
| pcaac323.lysopcac161  | -0.063537166 | 0.076484423 | 0.407577014 |
| c51dc.pcaac364        | -0.04696573  | 0.056537499 | 0.407588174 |
| pcaec365.c10          | -0.002792305 | 0.003361564 | 0.407612866 |
| asparticacid.pcaec343 | -0.070576183 | 0.084977558 | 0.407685718 |

|                               |              |             |             |
|-------------------------------|--------------|-------------|-------------|
| methionine.pcaac343           | -0.023611857 | 0.028430139 | 0.4076887   |
| pcaec402.pcaac300             | -0.045857907 | 0.055217243 | 0.407701239 |
| pcaac344.c10                  | -0.004321465 | 0.00520391  | 0.407742467 |
| pcaec421.phenylalanine        | 0.067276865  | 0.081014872 | 0.407742717 |
| alphaaminoadipicacid.pcaec380 | 0.030278631  | 0.036467706 | 0.407821558 |
| c18.smc261                    | 0.043331758  | 0.052191301 | 0.407842666 |
| kynurenine.lysopcac160        | 0.018901969  | 0.022766659 | 0.407843153 |
| pcaec301.alanine              | -0.014793934 | 0.017820942 | 0.407902071 |
| glutamicacid.smohc241         | 0.070814835  | 0.08530817  | 0.407922965 |
| alanine.pcaec301              | 0.052332771  | 0.063044792 | 0.407932766 |
| pcaac281.c10                  | -0.001560581 | 0.001880025 | 0.407934652 |
| c5.lysopcac170                | -0.029548749 | 0.035598798 | 0.407955104 |
| pcaac366.isoleucine           | 0.036899688  | 0.044458425 | 0.407992961 |
| pcaec425.c5                   | -0.016191342 | 0.019508669 | 0.408007402 |
| pcaec421.pcaec425             | 0.005565408  | 0.00670666  | 0.408076889 |
| glycine.pcaec406              | 0.008453627  | 0.010187755 | 0.408104978 |
| pcaac362.pcaac364             | -0.059613711 | 0.071848055 | 0.408140985 |
| pcaac361.pcaac322             | -0.075724522 | 0.09130778  | 0.408358874 |
| pcaec361.putrescine           | -0.04181257  | 0.050418045 | 0.408367383 |
| pcaec406.pcaec446             | -0.134719849 | 0.162459907 | 0.408405564 |
| pcaec444.c18                  | 0.027012901  | 0.032578038 | 0.408447633 |
| c51dc.serine                  | 0.014360857  | 0.017327768 | 0.408672157 |
| pcaac381.c10                  | -0.004726195 | 0.005703168 | 0.408717696 |
| pcaac360.pcaac385             | -0.0150366   | 0.018149272 | 0.408830654 |
| smc261.pcaac406               | -0.053271574 | 0.064307001 | 0.408887881 |
| pcaec380.pcaec422             | -0.056237039 | 0.06789403  | 0.408937827 |
| pcaac420.smohc141             | -0.013159756 | 0.015889107 | 0.408983598 |
| alphaaminoadipicacid.pcaec421 | 0.00244544   | 0.002952685 | 0.408992692 |
| pcaec321.serine               | -0.012143145 | 0.014662844 | 0.409021616 |
| pcaac323.pcaec382             | 0.008100627  | 0.009781697 | 0.40903079  |
| c142.pcaec420                 | -0.015785213 | 0.019061484 | 0.40904234  |
| pcaec365.smc260               | 0.028949397  | 0.03495986  | 0.409068047 |
| pcaac405.pcaec364             | 0.019562998  | 0.023629236 | 0.409158536 |
| pcaec423.pcaec444             | -0.120674076 | 0.145760952 | 0.40917248  |
| pcaec402.pcaec425             | 0.034240644  | 0.041363623 | 0.409225659 |
| pcaac403.serine               | -0.06255146  | 0.075575973 | 0.409300603 |
| pcaac360.smohc161             | 0.022270483  | 0.026907966 | 0.409305918 |
| pcaec363.smohc241             | -0.050352039 | 0.060841207 | 0.409337684 |
| pcaac281.leucine              | -0.007652727 | 0.009249135 | 0.409449668 |
| pcaec360.pcaac406             | -0.069236495 | 0.083686769 | 0.409489327 |
| c141oh.smc240                 | -0.029905979 | 0.036148648 | 0.409502563 |
| c51.tyrosine                  | -0.038336935 | 0.046341432 | 0.409521949 |
| pcaac364.pcaac420             | -0.061336154 | 0.074143295 | 0.409525486 |

|                      |              |             |             |
|----------------------|--------------|-------------|-------------|
| pcaec425.pcaac321    | 0.016570429  | 0.02003091  | 0.409537927 |
| alanine.c141oh       | 0.104155227  | 0.125927116 | 0.409614602 |
| c4.pcaac363          | 0.005624159  | 0.006800363 | 0.40965363  |
| c12.pcaac381         | -0.009637431 | 0.01165369  | 0.409683434 |
| pcaac344.pcaec424    | 0.006452922  | 0.007802989 | 0.409686053 |
| pcaec446.pcaac364    | -0.039804927 | 0.048136194 | 0.409718642 |
| c0.pcaec420          | -0.056046791 | 0.067777622 | 0.409719349 |
| pcaac343.pcaac344    | -0.068066273 | 0.082315462 | 0.409734272 |
| pcaec401.pcaac380    | -0.083112872 | 0.100514881 | 0.409747845 |
| pcaec363.c141oh      | -0.101707843 | 0.123008814 | 0.409769051 |
| pcaac381.pcaac385    | -0.011501462 | 0.013913494 | 0.409878063 |
| lysopcac280.pcaac425 | 0.103400182  | 0.125108433 | 0.409966389 |
| lysopcac161.pcaac322 | 0.07273747   | 0.088038738 | 0.410128046 |
| pcaac384.c14         | 0.022803984  | 0.027603501 | 0.410168724 |
| pcaec444.lysopcac161 | 0.047332477  | 0.057297219 | 0.41019115  |
| smc181.smc261        | -0.053032031 | 0.064197459 | 0.410196817 |
| pcaec301.smohc161    | 0.006099183  | 0.007383564 | 0.410212724 |
| pcaec340.pcaac422    | -0.032790065 | 0.039695145 | 0.410213519 |
| pcaac300.pcaac341    | 0.072484643  | 0.087753693 | 0.410239631 |
| pcaac401.pcaac365    | 0.021572641  | 0.026117687 | 0.410252525 |
| pcaac403.putrescine  | -0.054445733 | 0.065918769 | 0.410267415 |
| pcaec445.c18         | -0.02371868  | 0.028721512 | 0.410344333 |
| smc160.histidine     | -0.041010961 | 0.049661546 | 0.4103481   |
| pcaac420.lysopcac181 | 0.045883822  | 0.055565706 | 0.410377088 |
| smc240.c10           | -0.001615435 | 0.001956435 | 0.410408047 |
| pcaac360.lysopcac170 | 0.052857927  | 0.064016415 | 0.410413613 |
| c51dc.lysopcac182    | -0.038911548 | 0.04713348  | 0.410488622 |
| c12.pcaec425         | 0.006406662  | 0.007760423 | 0.410491379 |
| pcaac360.lysopcac161 | 0.066840548  | 0.08100075  | 0.410701497 |
| pcaac381.lysopcac204 | 0.063624888  | 0.077110225 | 0.410740088 |
| pcaec381.arginine    | -0.079489066 | 0.09633831  | 0.410747277 |
| c18.pcaec405         | -0.047327964 | 0.057361913 | 0.410762517 |
| alanine.spermidine   | 0.060648357  | 0.073523988 | 0.410874508 |
| smc241.pcaec365      | -0.038337302 | 0.046479731 | 0.410908953 |
| methionine.pcaec425  | -0.002237702 | 0.002713142 | 0.410939123 |
| c51dc.pcaec422       | 0.031814902  | 0.038577425 | 0.410974056 |
| pcaac381.pcaec343    | 0.069986146  | 0.084863769 | 0.410982221 |
| pcaec405.pcaac363    | -0.015705893 | 0.019046811 | 0.411035298 |
| pcaec421.pcaec322    | 0.060551925  | 0.073434262 | 0.411047279 |
| pcaac361.c10         | -0.002393374 | 0.002903539 | 0.41120445  |
| smc161.smohc141      | 0.050525102  | 0.061297604 | 0.411225131 |
| pcaac281.lysopcac203 | 0.010008834  | 0.012145209 | 0.411316694 |
| pcaac420.c0          | 0.000386003  | 0.000468438 | 0.411359917 |

|                              |              |             |             |
|------------------------------|--------------|-------------|-------------|
| smc260.pcaec421              | 0.001343768  | 0.001630776 | 0.411368672 |
| pcaec421.pcaac322            | -0.081742004 | 0.099206389 | 0.411394951 |
| pcaec406.c10                 | -0.002124026 | 0.002578131 | 0.411449508 |
| c8.c181                      | -0.033830855 | 0.041068219 | 0.411500807 |
| pcaec321.tyrosine            | -0.038639122 | 0.046913681 | 0.411586061 |
| isoleucine.smc181            | -0.023931624 | 0.029057954 | 0.411608184 |
| pcaec382.pcaec424            | -0.055686306 | 0.067617194 | 0.411625241 |
| c0.pcaac343                  | -0.015711144 | 0.019077507 | 0.411630692 |
| pcaec360.glutamicacid        | 0.033982339  | 0.041263972 | 0.411634928 |
| prolinr.histidine            | 0.052868962  | 0.064209582 | 0.411722255 |
| pcaec425.taurine             | -0.047570166 | 0.057774505 | 0.411724947 |
| pcaac341.c10                 | -0.00238839  | 0.002901054 | 0.411777453 |
| acetylmithoine.creatinine    | 0.005756116  | 0.006992216 | 0.411814851 |
| c182.lysopcac170             | -0.014020162 | 0.017033765 | 0.411892565 |
| pcaec420.lysopcac180         | 0.049347844  | 0.059959224 | 0.411924991 |
| c5.methionine                | -0.076940811 | 0.093501284 | 0.412003378 |
| pcaec446.c18                 | -0.022950012 | 0.027899356 | 0.412164916 |
| pcaec383.pcaac402            | -0.049851148 | 0.060631072 | 0.412389135 |
| pcaac320.pcaac363            | -0.009338649 | 0.01135814  | 0.412392458 |
| smohc161.pcaec301            | -0.05754606  | 0.069991932 | 0.412402347 |
| alanine.pcaac363             | 0.016263385  | 0.019781508 | 0.412419577 |
| pcaac281.smc160              | 0.102775786  | 0.125022304 | 0.412471381 |
| lysine.pcaac383              | 0.008207607  | 0.00998447  | 0.412484025 |
| putrescine.smc160            | -0.046500801 | 0.056570154 | 0.412503836 |
| c142.putrescine              | -0.023993055 | 0.029190565 | 0.412536077 |
| pcaac281.c141                | 0.029088718  | 0.035392934 | 0.412573675 |
| pcaac402.pcaac344            | -0.072840708 | 0.088628383 | 0.412580853 |
| pcaac406.lysopcac280         | 0.004083841  | 0.00497014  | 0.412689391 |
| c2.smohc161                  | 0.009482637  | 0.011540988 | 0.412704492 |
| pcaac342.c10                 | -0.002317803 | 0.002821235 | 0.412756891 |
| pcaec445.pcaac364            | -0.033613443 | 0.040916004 | 0.412775713 |
| pcaec446.c102                | -0.023776329 | 0.028942682 | 0.412790492 |
| pcaac421.pcaac403            | -0.011994116 | 0.014601045 | 0.412813788 |
| glutamine.c51                | 0.041618322  | 0.050664532 | 0.412817861 |
| pcaac386.pcaac322            | -0.05638741  | 0.068645522 | 0.412829227 |
| c4.pcaec301                  | -0.085325301 | 0.103878404 | 0.412847867 |
| c12.putrescine               | -0.029738842 | 0.036208186 | 0.412885737 |
| pcaec360.smc261              | 0.046905937  | 0.057110464 | 0.412891265 |
| pcaac321.pcaec424            | 0.009486279  | 0.011550451 | 0.412907553 |
| c182.c10                     | 0.003647226  | 0.004440986 | 0.412922324 |
| pcaec444.tyrosine            | -0.039020949 | 0.047518466 | 0.412973593 |
| c8.h1                        | -0.007335209 | 0.008933739 | 0.413033831 |
| smohc221.transhydroxyproline | 0.028074491  | 0.034194875 | 0.413064305 |

|                                |              |             |             |
|--------------------------------|--------------|-------------|-------------|
| asymmetricdimethylarginine.pca | 0.02076684   | 0.025299496 | 0.413163395 |
| pcaec401.pcaec402              | 0.031975673  | 0.038957631 | 0.413197075 |
| pcaac422.smc160                | -0.036809736 | 0.044849416 | 0.413219869 |
| putrescine.c0                  | 0.001033336  | 0.001259132 | 0.41325806  |
| pcaac386.leucine               | -0.004624652 | 0.0056353   | 0.413266983 |
| pcaac402.pcaac240              | -0.025819855 | 0.031463918 | 0.413289517 |
| pcaec365.smc202                | 0.050110532  | 0.061065276 | 0.41329628  |
| pcaec386.c181                  | -0.014334888 | 0.01747198  | 0.413384815 |
| pcaec322.pcaac405              | -0.049402224 | 0.06021475  | 0.413393997 |
| lysopcac140.pcaec425           | -0.003725411 | 0.004541057 | 0.413422232 |
| pcaec386.asparagine            | -0.009485684 | 0.011563761 | 0.41347345  |
| pcaec405.pcaac240              | -0.019768405 | 0.024100055 | 0.413490561 |
| pcaac364.pcaec446              | -0.032527247 | 0.039656454 | 0.413512195 |
| pcaec385.serotonin             | -0.095590952 | 0.116557826 | 0.413574505 |
| lysopcac170.smc160             | -0.048022823 | 0.058562778 | 0.41362742  |
| kynurenine.smc240              | 0.018022192  | 0.021978423 | 0.413643435 |
| pcaac401.pcaac363              | -0.024820225 | 0.030270302 | 0.413667172 |
| pcaec385.pcaec383              | 0.05688076   | 0.069371118 | 0.4136696   |
| pcaec402.pcaac240              | -0.012141894 | 0.014809917 | 0.41372631  |
| pcaec363.c0                    | 0.000405635  | 0.000494886 | 0.413837286 |
| smohc222.pcaac341              | 0.004739582  | 0.005783312 | 0.413909032 |
| pcaac240.pcaec403              | -0.077559014 | 0.094639377 | 0.413912303 |
| putrescine.smc261              | 0.02137341   | 0.026080581 | 0.413916426 |
| alanine.kynurenine             | -0.007395904 | 0.009024922 | 0.413925827 |
| c102.pcaec405                  | -0.068333559 | 0.083399632 | 0.414009365 |
| pcaac403.pcaec422              | -0.06765746  | 0.082576829 | 0.414022678 |
| pcaac405.pcaac386              | -0.020069857 | 0.024497307 | 0.414056532 |
| pcaec382.creatinine            | -0.00948727  | 0.011582983 | 0.414169176 |
| c14.pcaac422                   | 0.019127498  | 0.023355208 | 0.414218965 |
| lysopcac170.pcaec382           | -0.00773468  | 0.009444683 | 0.414239808 |
| pcaec425.smc260                | 0.035838256  | 0.043763535 | 0.414261811 |
| c14.h1                         | -0.002179045 | 0.002661277 | 0.414324434 |
| isoleucine.c2                  | 0.037426853  | 0.045710135 | 0.414330076 |
| lysopcac180.pcaac422           | -0.055119266 | 0.067319412 | 0.414338319 |
| glutamine.smc261               | 0.02335042   | 0.028527363 | 0.41447774  |
| h1.creatinine                  | 0.001784182  | 0.002180082 | 0.414549225 |
| pcaec386.lysine                | 0.089048203  | 0.108811075 | 0.414564581 |
| pcaec321.c10                   | -0.001709599 | 0.002089319 | 0.414631524 |
| pcaac360.serotonin             | -0.077970778 | 0.095293399 | 0.414653562 |
| pcaec341.c10                   | -0.001621    | 0.00198127  | 0.414685408 |
| pcaec364.smohc141              | -0.04730021  | 0.057825328 | 0.414786561 |
| c51.pcaec446                   | 0.064326014  | 0.078657722 | 0.414893402 |
| pcaec406.pcaac406              | -0.052314316 | 0.063973972 | 0.414923454 |

|                               |              |             |             |
|-------------------------------|--------------|-------------|-------------|
| pcaac426.c10                  | -0.002890613 | 0.003534887 | 0.414926548 |
| pcaac426.pcaec365             | 0.026800688  | 0.032774414 | 0.414930128 |
| pcaac385.pcaec362             | -0.024523107 | 0.029989346 | 0.414932823 |
| pcaac424.asparagine           | 0.016176057  | 0.019786016 | 0.415033761 |
| pcaec360.pcaec443             | -0.038635645 | 0.047267289 | 0.415126809 |
| pcaac421.pcaac384             | 0.030681302  | 0.037539305 | 0.415169575 |
| smc181.pcaec424               | 0.014686497  | 0.017971202 | 0.415219355 |
| ornithine.alanine             | 0.020627106  | 0.025244108 | 0.415286671 |
| pcaac343.pcaac320             | -0.038909931 | 0.047623309 | 0.415326728 |
| citruline.lysopcac160         | -0.009148353 | 0.011197941 | 0.415365459 |
| pcaec361.pcaac404             | -0.007556035 | 0.009249689 | 0.415406065 |
| lysopcac281.pcaec342          | -0.091561788 | 0.112097858 | 0.415459499 |
| pcaac386.lysopcac160          | 0.018957755  | 0.023211825 | 0.415501629 |
| creatinine.pcaac365           | 0.031022565  | 0.037989432 | 0.415568819 |
| smc240.glycine                | 0.031322322  | 0.038361577 | 0.415630302 |
| smohc241.serotonin            | -0.077193038 | 0.094551898 | 0.415683458 |
| alphaaminoadipicacid.pcaec406 | -0.004711606 | 0.00577142  | 0.415706534 |
| pcaac320.c10                  | -0.001765504 | 0.002162794 | 0.415741797 |
| pcaec340.pcaac240             | -0.015002882 | 0.018379739 | 0.415761143 |
| ornithine.c182                | -0.036022759 | 0.044133797 | 0.415792921 |
| pcaec424.pcaec360             | -0.005904507 | 0.007234284 | 0.415811769 |
| pcaec300.leucine              | -0.007147495 | 0.008759083 | 0.4159112   |
| smohc241.pcaec321             | 0.025964158  | 0.031818522 | 0.415912271 |
| glycine.pcaec365              | 0.022820938  | 0.027970727 | 0.415981356 |
| pcaac320.serotonin            | -0.088351698 | 0.108309276 | 0.41606754  |
| c0.pcaac360                   | -0.022924667 | 0.028103094 | 0.416067904 |
| histidine.creatinine          | -0.010130728 | 0.01242088  | 0.416132831 |
| pcaac362.smohc141             | 0.021169587  | 0.025957759 | 0.416178957 |
| smohc222.pcaec421             | 0.001182061  | 0.001449617 | 0.416241659 |
| smc160.pcaac386               | 0.011421418  | 0.01401031  | 0.416364109 |
| pcaec424.pcaec301             | 0.05666918   | 0.069519758 | 0.416400061 |
| serotonin.pcaec386            | 0.003938965  | 0.004832352 | 0.41641622  |
| pcaac381.c5                   | -0.023537563 | 0.028877629 | 0.416441509 |
| pcaec401.putrescine           | -0.048428009 | 0.059429752 | 0.416556341 |
| pcaec423.putrescine           | -0.040697547 | 0.049947025 | 0.416592823 |
| pcaec363.histidine            | -0.059902779 | 0.073517338 | 0.416594339 |
| asparagine.c10                | -0.002346376 | 0.002879977 | 0.416646408 |
| leucine.lysopcac182           | 0.025282711  | 0.031033885 | 0.416668956 |
| pcaec382.pcaac384             | 0.046538625  | 0.057128195 | 0.416695115 |
| pcaac363.pcaac385             | 0.064068827  | 0.078648931 | 0.416704851 |
| lysine.c10                    | -0.0031031   | 0.003809388 | 0.416719206 |
| c12.lysopcac160               | 0.015629951  | 0.019189376 | 0.416766055 |
| c8.c5                         | -0.009151976 | 0.011237932 | 0.41683911  |



|                                |              |             |             |
|--------------------------------|--------------|-------------|-------------|
| pcaec403.pcaec423              | 0.028996708  | 0.035606823 | 0.416853062 |
| pcaec423.pcaac385              | -0.01979774  | 0.0243179   | 0.416987827 |
| pcaec342.pcaec364              | -0.015407526 | 0.018926709 | 0.417021779 |
| pcaec360.pcaac386              | -0.042051295 | 0.051662645 | 0.417080709 |
| pcaec300.pcaec443              | -0.041888122 | 0.051462652 | 0.417085002 |
| pcaac385.pcaac425              | -0.091003606 | 0.111809891 | 0.417106775 |
| smc160.pcaac240                | -0.009003461 | 0.011062212 | 0.417118379 |
| glutamicacid.kynurenine        | -0.015162174 | 0.018629753 | 0.417132463 |
| asymmetricdimethylarginine.met | 0.016108897  | 0.019794187 | 0.417160533 |
| c162.pcaac341                  | -0.005423669 | 0.006664878 | 0.417189656 |
| putrescine.glycine             | 0.021258331  | 0.026124758 | 0.417215354 |
| pcaac343.smohc241              | 0.045818775  | 0.056309003 | 0.417227407 |
| pcaec322.acetylmithoine        | -0.069216463 | 0.085065331 | 0.417236852 |
| pcaec364.pcaec343              | -0.082815376 | 0.101788737 | 0.41728559  |
| pcaec342.c141oh                | -0.097965743 | 0.120425332 | 0.417344294 |
| acetylmithoine.lysopcac160     | 0.00920441   | 0.011315097 | 0.417364326 |
| histidine.c0                   | -0.000953597 | 0.001172739 | 0.417550735 |
| glutamine.pcaac323             | 0.054136597  | 0.066581791 | 0.417580606 |
| pcaac420.pcaac364              | -0.035590427 | 0.043778225 | 0.417645246 |
| acetylmithoine.smc180          | 0.05471175   | 0.067300822 | 0.417661079 |
| c102.pcaac380                  | -0.064657183 | 0.079541377 | 0.417700189 |
| c141oh.pcaac360                | -0.01909991  | 0.023497069 | 0.41770665  |
| pcaec384.c181                  | -0.008808901 | 0.010837276 | 0.417723847 |
| smohc161.pcaec384              | -0.070661441 | 0.086948021 | 0.417808087 |
| asparticacid.creatinine        | 0.037443007  | 0.046076405 | 0.417840884 |
| pcaac404.pcaac425              | -0.054263509 | 0.06677575  | 0.417844114 |
| pcaac422.methionine            | -0.045232986 | 0.055664695 | 0.417858742 |
| pcaac364.c5                    | 0.005689878  | 0.007002911 | 0.417913321 |
| c14.c141oh                     | -0.155625576 | 0.191604239 | 0.418072149 |
| kynurenine.pcaec425            | -0.002558941 | 0.00315126  | 0.418178989 |
| smohc161.pcaec322              | -0.081870317 | 0.100824031 | 0.418193441 |
| smc202.smc240                  | 0.031855302  | 0.039232128 | 0.418217567 |
| c102.pcaac365                  | -0.022331889 | 0.027505142 | 0.418247802 |
| asparagine.methioninesulfoxide | -0.012067292 | 0.014862937 | 0.418254644 |
| pcaac404.pcaec425              | -0.005913543 | 0.007283953 | 0.418280846 |
| pcaec322.serine                | -0.021418965 | 0.026388422 | 0.418383052 |
| smc160.taurine                 | 0.051282041  | 0.063182754 | 0.418402631 |
| pcaec343.lysopcac170           | -0.008608521 | 0.010606528 | 0.418414856 |
| h1.pcaac381                    | 0.035894848  | 0.04423077  | 0.418465846 |
| pcaec406.ornithine             | 0.017963048  | 0.022135797 | 0.418490148 |
| smohc141.creatinine            | -0.00452214  | 0.005572695 | 0.418496648 |
| pcaac344.pcaac385              | 0.031505596  | 0.038828591 | 0.418542314 |
| pcaac402.pcaec382              | -0.035652311 | 0.043941906 | 0.418571474 |

|                               |              |             |             |
|-------------------------------|--------------|-------------|-------------|
| pcaec341.methionine           | -0.028656763 | 0.035322462 | 0.418606349 |
| pcaac385.pcaec364             | 0.022963729  | 0.028305339 | 0.418608604 |
| pcaac342.pcaac402             | -0.059313331 | 0.073115981 | 0.418645003 |
| pcaac361.glycine              | -0.016909223 | 0.020844375 | 0.418650588 |
| putrescine.smc240             | 0.033033653  | 0.0407237   | 0.418677744 |
| pcaec363.pcaec341             | 0.087004877  | 0.107285011 | 0.418789768 |
| smc241.lysopcac180            | 0.053473431  | 0.065940103 | 0.418806997 |
| arginine.lysopcac204          | 0.041738162  | 0.051470072 | 0.418817564 |
| pcaec424.lysopcac203          | 0.012721141  | 0.015689981 | 0.418897601 |
| pcaec381.smohc241             | 0.050491667  | 0.062280999 | 0.41893981  |
| lysine.pcaec425               | -0.006096022 | 0.007519401 | 0.418940728 |
| pcaac365.pcaac422             | -0.032069471 | 0.039564872 | 0.419027554 |
| pcaac321.pcaac380             | 0.04084087   | 0.050389237 | 0.419054081 |
| pcaac343.c3                   | -0.09218553  | 0.113743202 | 0.419075339 |
| pcaec403.pcaec362             | 0.007188966  | 0.008871125 | 0.4191283   |
| glutamicacid.pcaec424         | -0.033524935 | 0.041376031 | 0.419201627 |
| c51.pcaec420                  | -0.020096233 | 0.024803573 | 0.419221601 |
| pcaec364.c10                  | -0.001982167 | 0.002447607 | 0.419437398 |
| lysopcac180.pcaec425          | -0.004335918 | 0.005354251 | 0.419454589 |
| pcaac363.c142                 | 0.02802513   | 0.034607244 | 0.4194564   |
| h1.c10                        | 0.003517933  | 0.004345455 | 0.419593407 |
| pcaec404.pcaec363             | 0.037913851  | 0.046836108 | 0.419631057 |
| pcaec380.lysopcac170          | 0.008268346  | 0.01021755  | 0.419786164 |
| acetylmithoine.lysopcac182    | -0.07520295  | 0.092933132 | 0.419794241 |
| c4.alanine                    | 0.008721756  | 0.010781125 | 0.419927116 |
| pcaac426.h1                   | 0.003406936  | 0.004211447 | 0.419934878 |
| pcaec363.asymmetricdimethylar | 0.04072074   | 0.05033867  | 0.419954822 |
| smc202.pcaac383               | 0.004037976  | 0.00499183  | 0.419965473 |
| pcaac344.h1                   | 0.001320494  | 0.001632625 | 0.420023365 |
| lysopcac281.pcaec380          | -0.050790486 | 0.062799023 | 0.42004499  |
| pcaac361.pcaac360             | 0.041383755  | 0.05117109  | 0.420070878 |
| pcaac342.glutamicacid         | 0.036374023  | 0.044976855 | 0.42007406  |
| methioninesulfoxide.pcaec383  | -0.097453111 | 0.120505729 | 0.420089265 |
| pcaec341.glutamicacid         | 0.035567779  | 0.043986911 | 0.420147698 |
| pcaec444.smc180               | -0.011240443 | 0.013902359 | 0.420188642 |
| pcaac421.c3                   | -0.026746097 | 0.033080178 | 0.420191155 |
| pcaec444.pcaec425             | -0.005772491 | 0.007139911 | 0.42021474  |
| smc261.c10                    | -0.001720453 | 0.002128183 | 0.420253639 |
| acetylmithoine.c10            | -0.003957604 | 0.004895621 | 0.420263808 |
| pcaec342.smc180               | -0.008064825 | 0.009979346 | 0.420404341 |
| pcaac360.c102                 | 0.034245874  | 0.0423769   | 0.420419073 |
| pcaac385.pcaac406             | -0.0267244   | 0.033070331 | 0.420429375 |
| c8.pcaec341                   | -0.04657376  | 0.057640412 | 0.420488291 |

|                                |              |             |             |
|--------------------------------|--------------|-------------|-------------|
| pcaac281.acetylornithoine      | -0.032915499 | 0.040744553 | 0.420577247 |
| lysopcac281.c5                 | 0.00689256   | 0.008532561 | 0.420608937 |
| pcaac364.lysopcac180           | -0.049768479 | 0.061610906 | 0.420613654 |
| c0.histidine                   | 0.053422609  | 0.066143282 | 0.420674927 |
| c5.pcaec322                    | -0.125563487 | 0.155488567 | 0.420754377 |
| pcaec406.alanine               | -0.012477416 | 0.015452928 | 0.420808854 |
| smc260.pcaec342                | -0.067411007 | 0.083514058 | 0.420961047 |
| arginine.smohc161              | -0.012245805 | 0.015171558 | 0.420976075 |
| pcaac366.kynurenine            | -0.012735905 | 0.015783383 | 0.421112018 |
| pcaec361.c10                   | -0.001833101 | 0.002271748 | 0.421115711 |
| pcaac344.lysopcac180           | -0.049080775 | 0.06082952  | 0.421146912 |
| pcaac403.pcaec425              | 0.006478239  | 0.008029044 | 0.421151104 |
| pcaac366.pcaec383              | 0.109126968  | 0.135301072 | 0.421324176 |
| serine.pcaac386                | 0.021955345  | 0.02722714  | 0.421422959 |
| phenylalanine.pcaec403         | -0.085557289 | 0.106124079 | 0.421524455 |
| pcaac405.asymmetricdimethylarq | 0.018435938  | 0.022868609 | 0.421543217 |
| pcaec405.pcaac406              | -0.039626317 | 0.049158208 | 0.42158355  |
| lysopcac182.pcaec402           | -0.021632144 | 0.026837371 | 0.42161348  |
| smc241.c51                     | 0.052580049  | 0.065234283 | 0.421628956 |
| pcaac323.glutamicacid          | 0.044951214  | 0.055773806 | 0.421665163 |
| histidine.smc261               | 0.020162691  | 0.02502244  | 0.421763588 |
| ornithine.glycine              | -0.017135523 | 0.021266334 | 0.421778641 |
| lysopcac203.h1                 | 0.004907186  | 0.0060907   | 0.421820697 |
| pcaec381.c162                  | -0.084644929 | 0.105064012 | 0.421840236 |
| c102.pcaac300                  | -0.095607739 | 0.118723806 | 0.422044655 |
| arginine.prolinr               | 0.043893458  | 0.054512533 | 0.42209988  |
| pcaac322.taurine               | -0.017742148 | 0.022036732 | 0.42214725  |
| pcaac421.pcaec382              | 0.019903216  | 0.024720961 | 0.422148413 |
| pcaac420.smc160                | -0.04126377  | 0.051286291 | 0.422457838 |
| pcaac300.pcaac323              | 0.031428965  | 0.039062955 | 0.422460635 |
| smc241.c10                     | -0.00144189  | 0.001792177 | 0.422475379 |
| pcaac386.pcaac300              | -0.071768838 | 0.089207068 | 0.422490842 |
| c141.smohc141                  | 0.023396347  | 0.029081295 | 0.422493332 |
| pcaec445.taurine               | -0.023108599 | 0.028723689 | 0.422494302 |
| pcaec381.c181                  | 0.038865845  | 0.048315375 | 0.42254828  |
| pcaac343.c10                   | -0.004065174 | 0.00505376  | 0.42256766  |
| leucine.pcaac426               | 0.034708958  | 0.043150157 | 0.422573392 |
| pcaec321.h1                    | 0.001551015  | 0.001928295 | 0.42259118  |
| pcaac425.pcaec380              | 0.046855232  | 0.058256543 | 0.422622208 |
| smc261.asymmetricdimethylargi  | 0.02152801   | 0.026768332 | 0.422655043 |
| arginine.pcaec425              | -0.006086811 | 0.007568794 | 0.422675722 |
| glutamine.pcaac322             | -0.031035593 | 0.038592549 | 0.422682727 |
| c8.smc261                      | 0.037699536  | 0.046882394 | 0.422715084 |

|                                |              |             |             |
|--------------------------------|--------------|-------------|-------------|
| c12.c142                       | 0.046093634  | 0.057321451 | 0.422717699 |
| pcaac384.lysopcac180           | -0.069217143 | 0.086078229 | 0.422721349 |
| citruline.pcaac363             | 0.011855855  | 0.014745844 | 0.422782206 |
| pcaac380.pcaac383              | 0.016508829  | 0.020533326 | 0.422788872 |
| smc241.lysopcac170             | -0.011867491 | 0.014760616 | 0.422791582 |
| pcaac341.pcaac381              | 0.027728357  | 0.034488713 | 0.422799343 |
| pcaac443.pcaac381              | 0.022571577  | 0.028075899 | 0.422819486 |
| pcaac402.pcaac362              | 0.008906337  | 0.011078293 | 0.422821582 |
| pcaac423.pcaac364              | -0.038866764 | 0.048345967 | 0.42283026  |
| pcaac425.pcaac401              | 0.02667274   | 0.033189502 | 0.422991387 |
| phenylalanine.pcaec380         | 0.047979991  | 0.059706465 | 0.423021318 |
| lysopcac203.lysine             | 0.061111114  | 0.076058262 | 0.423090366 |
| pcaec405.pcaac281              | -0.004775067 | 0.005943421 | 0.423123403 |
| c182.asymmetricdimethylarginin | -0.011488787 | 0.014301091 | 0.423163841 |
| lysopcac281.lysopcac170        | -0.022397907 | 0.027883371 | 0.4232095   |
| pcaec342.glycine               | 0.036807029  | 0.045827328 | 0.423269061 |
| asparticacid.pcaac420          | 0.082120049  | 0.102246613 | 0.423275411 |
| pcaec421.pcaac381              | 0.047670594  | 0.05935632  | 0.423293177 |
| pcaec382.lysopcac204           | -0.10311849  | 0.128399722 | 0.42330503  |
| pcaac383.pcaac362              | -0.013837672 | 0.017230275 | 0.423306761 |
| pcaac385.pcaac240              | -0.026213351 | 0.032646418 | 0.423396048 |
| pcaec382.valine                | -0.020515617 | 0.025552657 | 0.423437035 |
| pcaac342.kynurenine            | -0.012317876 | 0.015345078 | 0.423524162 |
| pcaec364.valine                | -0.054360412 | 0.067723735 | 0.423550642 |
| pcaac406.isoleucine            | 0.026136777  | 0.032567072 | 0.423623608 |
| c16.c10                        | 0.036703976  | 0.045736539 | 0.423648633 |
| lysopcac140.h1                 | -0.003275262 | 0.004082078 | 0.4237393   |
| pcaec444.transhydroxyproline   | 0.026282996  | 0.032765851 | 0.423857749 |
| pcaac365.pcaec401              | 0.05886882   | 0.073424548 | 0.424080631 |
| pcaac321.methionine            | -0.024992474 | 0.031176446 | 0.424145992 |
| glutamicacid.pcaac321          | 0.008647857  | 0.010787838 | 0.42415509  |
| h1.pcaac300                    | -0.049163303 | 0.061340246 | 0.424238703 |
| glutamine.lysopcac161          | -0.041293562 | 0.051523593 | 0.424259289 |
| lysopcac170.pcaac240           | -0.009951838 | 0.012419755 | 0.424350714 |
| pcaec342.c10                   | -0.001673124 | 0.002088045 | 0.424352769 |
| histidine.c18                  | 0.037190342  | 0.04641422  | 0.424362611 |
| pcaac420.pcaac386              | 0.014675499  | 0.018315909 | 0.424378272 |
| histidine.c142                 | 0.030229001  | 0.037730923 | 0.42441875  |
| smohc141.c18                   | 0.026431756  | 0.032996404 | 0.424490013 |
| pcaac384.pcaec360              | -0.004029929 | 0.005031201 | 0.424525826 |
| glutamicacid.pcaec362          | 0.025421413  | 0.03173991  | 0.424559595 |
| c162.pcaec321                  | 0.02605962   | 0.032539631 | 0.424600629 |
| pcaec361.valine                | -0.02835738  | 0.035409157 | 0.42460587  |

|                              |              |             |             |
|------------------------------|--------------|-------------|-------------|
| smohc221.c10                 | -0.001762661 | 0.00220114  | 0.424637075 |
| pcaac426.methioninesulfoxide | -0.053522928 | 0.066843675 | 0.424681384 |
| spermidine.c8                | 0.012324762  | 0.015392729 | 0.424699077 |
| smohc161.pcaec362            | 0.018205208  | 0.022737775 | 0.424715289 |
| pcaec341.serine              | -0.014672847 | 0.018329269 | 0.424798743 |
| lysopcac160.pcaec425         | -0.004188633 | 0.005232638 | 0.424817421 |
| pcaac364.kynurenine          | -0.007083491 | 0.008849466 | 0.424840212 |
| pcaec384.pcaac365            | -0.029586774 | 0.036964785 | 0.424862367 |
| pcaec420.c162                | -0.058866145 | 0.073547448 | 0.424874545 |
| pcaec401.smc181              | -0.007692211 | 0.009611421 | 0.424911106 |
| ornithine.valine             | -0.065480043 | 0.081817956 | 0.424914604 |
| lysine.pcaec385              | 0.043211479  | 0.053993407 | 0.424916658 |
| pcaac386.c182                | -0.027738942 | 0.034660782 | 0.424923963 |
| acetylmethionine.methionine  | -0.033691883 | 0.042100449 | 0.424937767 |
| pcaac343.serine              | -0.018855102 | 0.023566899 | 0.425057025 |
| lysine.c16                   | -0.046756415 | 0.058441285 | 0.425062332 |
| pcaac281.pcaac360            | 0.046585187  | 0.058238979 | 0.425155245 |
| pcaac380.pcaec443            | -0.038754089 | 0.048453955 | 0.425203949 |
| pcaac363.serotonin           | -0.102645842 | 0.128337741 | 0.425205365 |
| pcaec403.pcaac381            | 0.02945183   | 0.036829252 | 0.425277247 |
| pcaec380.pcaac403            | 0.009457601  | 0.011827767 | 0.425321027 |
| pcaac344.c0                  | 0.000712928  | 0.000891769 | 0.425410974 |
| glutamicacid.pcaac404        | 0.009911822  | 0.012398876 | 0.425434818 |
| lysopcac280.pcaac240         | 0.032511513  | 0.040672389 | 0.425470666 |
| pcaac322.tyrosine            | 0.040799132  | 0.051040959 | 0.425476409 |
| pcaac384.pcaec420            | -0.01734276  | 0.021699215 | 0.425537989 |
| asparagine.pcaac361          | 0.058924107  | 0.0737262   | 0.425541195 |
| smc180.pcaec403              | 0.029972757  | 0.037506127 | 0.425590841 |
| pcaec423.pcaec445            | -0.042119435 | 0.052716949 | 0.425688865 |
| smc161.lysopcac280           | -0.010868607 | 0.013603514 | 0.425698967 |
| c182.h1                      | -0.001209112 | 0.001513548 | 0.425754542 |
| pcaac422.pcaac421            | -0.039602605 | 0.049579324 | 0.42580487  |
| lysopcac161.c51dc            | 0.121871499  | 0.152581151 | 0.425828134 |
| pcaac323.c10                 | -0.002893178 | 0.003623241 | 0.425959302 |
| lysopcac204.pcaac386         | -0.023791375 | 0.029795556 | 0.425969743 |
| acetylmethionine.pcaec340    | -0.066933729 | 0.08384907  | 0.42609864  |
| serine.pcaec342              | 0.07810011   | 0.097841814 | 0.426119492 |
| glycine.putrescine           | 0.011680172  | 0.014633088 | 0.426134278 |
| c0.alanine                   | 0.00828834   | 0.010384018 | 0.4261461   |
| pcaac322.pcaac425            | 0.092386521  | 0.115762601 | 0.426211751 |
| creatinine.methionine        | -0.044472422 | 0.0557272   | 0.426229587 |
| c101.pcaac341                | -0.005600966 | 0.007019676 | 0.426312143 |
| pcaec361.ornithine           | -0.058825449 | 0.073727553 | 0.426323232 |

|                                 |              |             |             |
|---------------------------------|--------------|-------------|-------------|
| histidine.pcaec425              | -0.004015624 | 0.005035801 | 0.426589835 |
| c12.pcaac424                    | 0.006968107  | 0.008739078 | 0.426627388 |
| pcaec405.c51                    | 0.08263443   | 0.103653802 | 0.426705326 |
| c162.smc160                     | -0.056618307 | 0.071026323 | 0.426745953 |
| pcaac363.pcaac365               | -0.035945435 | 0.045093852 | 0.426757788 |
| pcaac383.pcaac320               | -0.04346145  | 0.054532443 | 0.426839741 |
| c141.pcaac343                   | -0.022894653 | 0.028730323 | 0.426898906 |
| pcaec402.asymmetricdimethylar;  | 0.027608578  | 0.034654274 | 0.427011819 |
| pcaec381.pcaac381               | 0.027033277  | 0.033937658 | 0.427086601 |
| pcaac323.c51                    | -0.082116614 | 0.103102387 | 0.427144494 |
| methionine.pcaac381             | 0.016262442  | 0.020419819 | 0.427174689 |
| smc240.pcaac386                 | 0.039000505  | 0.048975286 | 0.42721783  |
| c18.methioninesulfoxide         | 0.036561677  | 0.045913293 | 0.427223763 |
| kynurenine.pcaec364             | 0.013365485  | 0.01678819  | 0.427337188 |
| pcaac363.smc180                 | -0.007920892 | 0.009949354 | 0.427338962 |
| pcaac383.c10                    | -0.001865961 | 0.002343838 | 0.427343368 |
| pcaec385.c182                   | -0.022426175 | 0.028170409 | 0.42735713  |
| creatinine.putrescine           | -0.021030886 | 0.026419127 | 0.427381514 |
| pcaac344.pcaac323               | 0.066929001  | 0.084080039 | 0.42740026  |
| pcaec322.c10                    | -0.001969534 | 0.002474306 | 0.427412246 |
| pcaac420.c10                    | -0.00177866  | 0.002234572 | 0.427424584 |
| acetylmithoine.pcaac380         | 0.048214194  | 0.060575296 | 0.42744493  |
| alanine.pcaec382                | 0.021249174  | 0.026699548 | 0.427488681 |
| pcaac420.leucine                | -0.006808172 | 0.008554624 | 0.427497781 |
| serotonin.pcaec446              | -0.054788436 | 0.068843397 | 0.427500932 |
| pcaec321.lysine                 | -0.06619474  | 0.083176923 | 0.427507277 |
| asymmetricdimethylarginine.acet | 0.03354921   | 0.042164359 | 0.427596285 |
| lysopcac140.methionine          | -0.027827648 | 0.034973924 | 0.427601218 |
| smohc222.phenylalanine          | 0.038558462  | 0.048462143 | 0.427617202 |
| pcaac363.pcaec385               | -0.04808156  | 0.06043322  | 0.427632346 |
| pcaac342.c14                    | -0.028907493 | 0.036333945 | 0.427637591 |
| smc202.lysopcac203              | -0.016343206 | 0.020542167 | 0.427644905 |
| pcaec443.pcaac406               | -0.046075191 | 0.057922233 | 0.427718292 |
| pcaec384.pcaac406               | -0.036717606 | 0.04616067  | 0.427739096 |
| pcaac365.c101                   | -0.005559799 | 0.006990274 | 0.427778715 |
| pcaac300.smc261                 | -0.050198823 | 0.063116303 | 0.427792447 |
| pcaec382.pcaec383               | -0.223858555 | 0.281512541 | 0.427873149 |
| pcaac364.c0                     | 0.000534137  | 0.000671735 | 0.42789579  |
| pcaec321.pcaac405               | -0.037314417 | 0.046933193 | 0.427957399 |
| pcaac341.pcaec446               | -0.035123337 | 0.04417759  | 0.427960388 |
| c102.pcaec445                   | 0.051251584  | 0.064475649 | 0.428047593 |
| pcaac343.c0                     | 0.001110216  | 0.0013967   | 0.428055407 |
| pcaac406.pcaac281               | 0.001525122  | 0.001918672 | 0.428055624 |

|                                |              |             |             |
|--------------------------------|--------------|-------------|-------------|
| c51.c182                       | 0.03236097   | 0.04071367  | 0.428079736 |
| smc180.pcaec361                | -0.009763089 | 0.012286738 | 0.428218362 |
| pcaec401.pcaec340              | 0.062459293  | 0.078607392 | 0.428236359 |
| glutamine.c162                 | 0.066973393  | 0.084289621 | 0.428242166 |
| c16.transhydroxyproline        | 0.020004537  | 0.025177264 | 0.428250896 |
| pcaac365.pcaec365              | 0.032353402  | 0.040726187 | 0.428329166 |
| pcaac402.pcaec425              | 0.005565134  | 0.007005764 | 0.428356873 |
| c10.pcaac402                   | 0.017601133  | 0.022158116 | 0.428369916 |
| pcaec445.smc261                | 0.025569805  | 0.032192135 | 0.428401902 |
| pcaec384.isoleucine            | 0.016850851  | 0.021216689 | 0.428437355 |
| pcaec446.smc160                | -0.083441706 | 0.105077423 | 0.428512094 |
| pcaec321.pcaec383              | -0.049986565 | 0.062948673 | 0.428519571 |
| pcaac385.ornithine             | 0.019805792  | 0.024942639 | 0.428537503 |
| pcaec422.pcaac384              | 0.035365915  | 0.044539332 | 0.428546638 |
| pcaec386.lysopcac160           | -0.02458022  | 0.030956201 | 0.428549922 |
| pcaec445.pcaac421              | 0.068561354  | 0.086352669 | 0.428586503 |
| lysopcac170.pcaec445           | -0.021251296 | 0.026767529 | 0.428614592 |
| pcaac363.c51dc                 | -0.099134017 | 0.124879507 | 0.428662963 |
| smc260.c101                    | -0.039892028 | 0.050255138 | 0.42869041  |
| c2.c14                         | 0.07719553   | 0.097271873 | 0.42879729  |
| lysopcac161.pcaec365           | 0.025250198  | 0.031817115 | 0.428798232 |
| pcaec404.asymmetricdimethylar; | -0.017633987 | 0.022222104 | 0.428839204 |
| pcaec342.c2                    | -0.045760944 | 0.057672572 | 0.428881299 |
| glutamine.smohc141             | 0.032212078  | 0.04059712  | 0.428883573 |
| c142.pcaec343                  | -0.058621824 | 0.073885278 | 0.428907008 |
| pcaec422.pcaec301              | -0.074638957 | 0.094088315 | 0.428982872 |
| pcaec446.c141oh                | 0.082971393  | 0.104595303 | 0.428997373 |
| c3.pcaec384                    | 0.04443695   | 0.056025928 | 0.429062068 |
| smohc141.c10                   | -0.001689634 | 0.002130357 | 0.429078042 |
| smohc141.pcaac422              | -0.014408708 | 0.018167142 | 0.429079838 |
| pcaec382.pcaec363              | 0.037559649  | 0.047359472 | 0.429105029 |
| creatinine.taurine             | 0.040301414  | 0.050824357 | 0.429175299 |
| pcaac343.serotonin             | -0.106972477 | 0.134926175 | 0.429252209 |
| methioninesulfoxide.c0         | 0.003765388  | 0.004750125 | 0.429327584 |
| lysopcac160.ornithine          | 0.071268536  | 0.089912576 | 0.429356572 |
| asparticacid.pcaec386          | 0.0083838    | 0.010577337 | 0.429370186 |
| pcaac322.pcaec422              | -0.017007638 | 0.021458201 | 0.429384897 |
| pcaac402.c142                  | 0.028294785  | 0.035704865 | 0.429460879 |
| smohc161.c18                   | 0.029474852  | 0.037194139 | 0.429462862 |
| methioninesulfoxide.pcaac360   | -0.065194433 | 0.082272391 | 0.429484838 |
| lysopcac204.acetylnithoine     | -0.022691493 | 0.028637125 | 0.429508935 |
| pcaec343.smc240                | -0.031998349 | 0.040383589 | 0.429520591 |
| pcaec445.pcaec425              | -0.003207721 | 0.004048718 | 0.42956683  |

|                              |              |             |             |
|------------------------------|--------------|-------------|-------------|
| pcaac341.c142                | 0.027295055  | 0.034452591 | 0.429584804 |
| pcaec380.c10                 | -0.003103405 | 0.003917471 | 0.429616036 |
| pcaac425.lysopcac182         | -0.012882641 | 0.01626454  | 0.429689653 |
| smc180.tyrosine              | -0.0664724   | 0.083925539 | 0.429706532 |
| pcaac425.c14                 | 0.050615932  | 0.063906514 | 0.429711948 |
| acetylmithoine.pcaac404      | -0.009628507 | 0.012158266 | 0.429770031 |
| pcaec425.pcaec424            | -0.039658014 | 0.050081813 | 0.429808591 |
| smohc241.pcaac363            | -0.006928636 | 0.008752214 | 0.429936889 |
| pcaec405.pcaac322            | -0.071948079 | 0.090893779 | 0.429984347 |
| isoleucine.c0                | -0.000518548 | 0.000655096 | 0.429985433 |
| pcaec445.c4                  | -0.014938684 | 0.018875687 | 0.430064325 |
| pcaac322.pcaac385            | 0.015355348  | 0.019402508 | 0.430072555 |
| pcaac426.pcaec422            | -0.021698487 | 0.027420004 | 0.430114762 |
| pcaec384.phenylalanine       | 0.033864495  | 0.042799797 | 0.43017732  |
| h1.alanine                   | 0.025909478  | 0.032750979 | 0.430249901 |
| pcaac364.pcaac344            | 0.065553466  | 0.082868296 | 0.430278635 |
| pcaec406.creatinine          | 0.030665372  | 0.038768278 | 0.430316256 |
| pcaec443.c142                | 0.042048043  | 0.053165554 | 0.430375876 |
| c141.c4                      | -0.031777186 | 0.040181623 | 0.430404991 |
| pcaac401.creatinine          | -0.030060338 | 0.038015037 | 0.430457433 |
| smc161.c10                   | -0.001533692 | 0.001939711 | 0.430496969 |
| smohc241.lysopcac161         | -0.070842413 | 0.089609508 | 0.430562484 |
| lysopcac170.pcaac323         | -0.062187204 | 0.078683427 | 0.430691141 |
| c141.c8                      | 0.049200968  | 0.062252907 | 0.430695116 |
| pcaac402.pcaac300            | -0.053745963 | 0.068003787 | 0.430696452 |
| pcaec386.pcaec360            | -0.003851648 | 0.004873541 | 0.43070794  |
| pcaac341.pcaac361            | -0.062239265 | 0.078762919 | 0.430770669 |
| c10.pcaec444                 | -0.092034938 | 0.116475272 | 0.430795726 |
| pcaac385.smohc222            | 0.004473338  | 0.005662591 | 0.430904267 |
| pcaec382.pcaac300            | -0.070853868 | 0.089697916 | 0.430941602 |
| pcaec381.pcaac321            | 0.012663909  | 0.016032113 | 0.430946021 |
| citruline.pcaec341           | 0.029977434  | 0.037952999 | 0.430976396 |
| lysopcac204.serotonin        | -0.078540114 | 0.099459555 | 0.431085782 |
| smohc161.glutamine           | -0.01444867  | 0.018301128 | 0.431186351 |
| putrescine.glutamine         | -0.02209598  | 0.027997228 | 0.431346989 |
| smc160.pcaec301              | -0.037573271 | 0.047610795 | 0.431373103 |
| lysopcac170.pcaac405         | 0.063110962  | 0.079975941 | 0.431402866 |
| methioninesulfoxide.pcaec446 | 0.104287603  | 0.132159436 | 0.431414436 |
| methioninesulfoxide.pcaac385 | -0.049785302 | 0.063095146 | 0.431445448 |
| pcaec425.glutamicacid        | 0.056405421  | 0.071490595 | 0.431480652 |
| lysopcac180.smohc141         | -0.02640813  | 0.033470793 | 0.431480951 |
| pcaec300.creatinine          | -0.004857457 | 0.006157319 | 0.431538497 |
| c102.pcaac406                | 0.03458824   | 0.043850497 | 0.43160551  |



|                                |              |             |             |
|--------------------------------|--------------|-------------|-------------|
| smc260.pcaec322                | -0.071234599 | 0.090315311 | 0.431631263 |
| c101.pcaac386                  | 0.014041857  | 0.017803341 | 0.431638209 |
| pcaac401.pcaac360              | -0.004741051 | 0.00601209  | 0.431716338 |
| pcaac404.pcaac364              | -0.016080888 | 0.02039257  | 0.431728114 |
| pcaac322.lysopcac180           | -0.045545213 | 0.057767112 | 0.431808505 |
| lysine.pcaec422                | -0.041378787 | 0.052483204 | 0.43181344  |
| citruline.pcaec383             | 0.068750407  | 0.087204607 | 0.431836265 |
| prolinr.h1                     | -0.001723381 | 0.002186122 | 0.431866792 |
| lysopcac182.lysopcac180        | 0.083128789  | 0.105451761 | 0.431876702 |
| pcaec383.smohc221              | -0.094171219 | 0.119480894 | 0.431959099 |
| phenylalanine.pcaac300         | -0.029646271 | 0.037614215 | 0.431960841 |
| c16.methioninesulfoxide        | 0.021113762  | 0.026789856 | 0.431984989 |
| lysopcac170.pcaac383           | 0.014506162  | 0.018406306 | 0.431994889 |
| leucine.c141oh                 | -0.111263516 | 0.141185235 | 0.432018582 |
| c141oh.pcaac420                | -0.107518905 | 0.136434301 | 0.432020942 |
| glutamicacid.pcaec444          | -0.099097834 | 0.125755669 | 0.432047042 |
| pcaec420.pcaac380              | 0.048842774  | 0.06199455  | 0.432142003 |
| c102.pcaec446                  | -0.026382613 | 0.033487708 | 0.432157267 |
| pcaec423.pcaac322              | -0.061603247 | 0.078205491 | 0.432227096 |
| pcaac366.pcaac381              | 0.043907581  | 0.055743339 | 0.432248052 |
| prolinr.glutamine              | 0.0193166    | 0.024524471 | 0.432264442 |
| asparagine.smc261              | 0.022473789  | 0.028535743 | 0.432310908 |
| lysopcac180.citruline          | 0.032712754  | 0.041542378 | 0.432375781 |
| pcaac364.pcaac422              | -0.040401197 | 0.051309369 | 0.4324056   |
| pcaec403.pcaac361              | 0.006660199  | 0.008459441 | 0.432460614 |
| pcaac343.pcaac426              | 0.081140568  | 0.103063047 | 0.432471678 |
| pcaec406.pcaec383              | 0.072084716  | 0.091566092 | 0.432499748 |
| lysopcac140.taurine            | -0.056658459 | 0.071979961 | 0.432558288 |
| c181.pcaac322                  | -0.05865083  | 0.074518933 | 0.432606519 |
| methioninesulfoxide.ornithine  | -0.063861543 | 0.081141283 | 0.432617088 |
| pcaac424.pcaec425              | 0.005312115  | 0.00675081  | 0.432707949 |
| c5.c142                        | -0.100975892 | 0.12832679  | 0.432719816 |
| alanine.pcaec403               | 0.032984702  | 0.041920086 | 0.432730362 |
| pcaec365.asymmetricdimethylar; | 0.039859309  | 0.050658065 | 0.432740115 |
| smc180.c10                     | -0.001663279 | 0.00211419  | 0.432803628 |
| c5.lysopcac161                 | -0.140231185 | 0.178272379 | 0.432867623 |
| pcaac361.smohc222              | -0.009270296 | 0.011785145 | 0.432869595 |
| h1.pcaac404                    | 0.007098166  | 0.009024421 | 0.432903288 |
| c142.pcaec443                  | -0.066396403 | 0.084415775 | 0.432909485 |
| smc180.lysopcac181             | 0.037363978  | 0.047513316 | 0.432997385 |
| smc240.pcaec343                | -0.059182896 | 0.075259883 | 0.433002777 |
| smc160.smc260                  | 0.037194201  | 0.047307824 | 0.433098336 |
| glutamicacid.histidine         | 0.056214177  | 0.071507501 | 0.433149062 |

|                                   |              |             |             |
|-----------------------------------|--------------|-------------|-------------|
| pcaec381.pcaec425                 | 0.003385321  | 0.00430694  | 0.433215929 |
| acetylmethionine.pcaec406         | -0.016000046 | 0.020358032 | 0.433264051 |
| c12.leucine                       | -0.007372851 | 0.00938153  | 0.43328905  |
| pcaac365.pcaac406                 | -0.0504998   | 0.064259523 | 0.433299212 |
| pcaac422.pcaac384                 | 0.037247508  | 0.047397085 | 0.433306168 |
| smohc161.c141                     | 0.025232327  | 0.032109157 | 0.433324322 |
| pcaac405.pcaac322                 | -0.052096413 | 0.066297899 | 0.433345818 |
| acetylmethionine.c102             | 0.019834408  | 0.025242898 | 0.433375428 |
| pcaac384.pcaac385                 | -0.01566145  | 0.019934221 | 0.433425436 |
| pcaec386.c0                       | 0.000357917  | 0.000455604 | 0.433465051 |
| lysopcaac161.c16                  | 0.036197849  | 0.046082317 | 0.433514446 |
| c181.pcaac240                     | -0.016542466 | 0.021060617 | 0.433534828 |
| c8.acetylmethionine               | -0.023889435 | 0.030418472 | 0.433598924 |
| lysopcaac181.lysopcaac182         | 0.047879495  | 0.06096736  | 0.433616156 |
| serotonin.pcaac422                | 0.046058953  | 0.058652354 | 0.433641045 |
| leucine.pcaac420                  | 0.04352438   | 0.055429877 | 0.433683223 |
| pcaec403.c14                      | 0.057566297  | 0.073318884 | 0.433721496 |
| pcaec405.pcaac420                 | 0.081586413  | 0.10392394  | 0.433774535 |
| pcaec385.isoleucine               | 0.017590105  | 0.022406956 | 0.433792139 |
| pcaac300.smc161                   | -0.044245857 | 0.056362343 | 0.433794244 |
| pcaec383.pcaac240                 | -0.016295553 | 0.020758248 | 0.433799697 |
| pcaec402.serotonin                | -0.068921859 | 0.087799583 | 0.433814361 |
| creatinine.lysopcaac182           | 0.02465245   | 0.031406824 | 0.433844417 |
| lysine.c142                       | 0.050820932  | 0.064759732 | 0.433948434 |
| lysopcaac170.glycine              | 0.028310177  | 0.03608248  | 0.434044927 |
| pcaec380.lysopcaac160             | 0.019173628  | 0.024439877 | 0.434088146 |
| phenylalanine.pcaac366            | 0.033530278  | 0.042741769 | 0.434109916 |
| pcaec403.c51                      | -0.078616889 | 0.100215641 | 0.434114479 |
| pcaac360.smc160                   | -0.072735619 | 0.092728045 | 0.434161266 |
| pcaec401.c0                       | 0.000886936  | 0.001130811 | 0.434196916 |
| pcaec381.c10                      | -0.003610525 | 0.004603693 | 0.434237412 |
| arginine.pcaec401                 | 0.07328606   | 0.093463635 | 0.434327377 |
| smc161.pcaec364                   | -0.021989228 | 0.028048211 | 0.434405371 |
| pcaec342.pcaac425                 | 0.082293195  | 0.104968638 | 0.434405862 |
| smc240.pcaec382                   | 0.007279965  | 0.009287363 | 0.434477137 |
| smohc222.h1                       | 0.001214976  | 0.001550091 | 0.434504791 |
| smc240.asymmetricdimethylarginine | -0.014737206 | 0.018802329 | 0.434512347 |
| smc180.pcaec363                   | -0.014139253 | 0.018044149 | 0.43463208  |
| pcaac421.pcaac321                 | 0.02111072   | 0.026942782 | 0.434663164 |
| pcaec300.serine                   | -0.009814097 | 0.012525466 | 0.434667578 |
| spermidine.lysopcaac170           | -0.073316759 | 0.093590008 | 0.434754802 |
| pcaec423.pcaac404                 | -0.005673451 | 0.007242808 | 0.434790065 |
| lysopcaac161.pcaec385             | -0.02796522  | 0.035702421 | 0.434810943 |

|                                 |              |             |             |
|---------------------------------|--------------|-------------|-------------|
| leucine.pcaec401                | 0.067029573  | 0.085575377 | 0.434814053 |
| lysopcac161.h1                  | 0.002690705  | 0.003435456 | 0.434851949 |
| c16.histidine                   | -0.061798978 | 0.078907639 | 0.43487251  |
| phenylalanine.c8                | 0.034758448  | 0.044382033 | 0.434882061 |
| pcaec444.pcaac402               | -0.081231368 | 0.103726974 | 0.43490436  |
| c3.lysopcac280                  | -0.005743881 | 0.007334887 | 0.434925521 |
| pcaec383.pcaec425               | 0.004692174  | 0.005991999 | 0.434935609 |
| smc181.tyrosine                 | -0.059131782 | 0.075517831 | 0.434968299 |
| smc261.pcaac321                 | 0.023683165  | 0.030248604 | 0.435007403 |
| pcaac365.pcaec404               | -0.018192584 | 0.023237926 | 0.435046831 |
| pcaec422.smc181                 | -0.00690836  | 0.008827507 | 0.43521582  |
| lysopcac180.c16                 | 0.035035338  | 0.044770753 | 0.435242134 |
| pcaac361.lysopcac280            | 0.008788876  | 0.011231906 | 0.435275933 |
| leucine.pcaac403                | 0.011037578  | 0.014106725 | 0.43531001  |
| pcaac421.pcaac364               | -0.044274373 | 0.056591766 | 0.435361073 |
| pcaac421.smc180                 | -0.007495661 | 0.009581137 | 0.435367706 |
| smohc161.c10                    | -0.001721972 | 0.002201215 | 0.435398622 |
| pcaec382.pcaec425               | 0.004615719  | 0.005901111 | 0.435459825 |
| lysopcac280.smohc141            | -0.01300159  | 0.016625529 | 0.435548994 |
| lysopcac181.c141oh              | -0.072917225 | 0.093260791 | 0.43564387  |
| lysopcac181.leucine             | 0.007011411  | 0.008967721 | 0.435651975 |
| pcaac385.pcaec385               | -0.044600403 | 0.057045798 | 0.435660648 |
| pcaac404.c3                     | -0.055460292 | 0.070964339 | 0.435843218 |
| c2.pcaec363                     | -0.010676068 | 0.013661614 | 0.435877673 |
| methioninesulfoxide.phenylalani | 0.104590486  | 0.133845969 | 0.435901319 |
| pcaec443.phenylalanine          | 0.060107387  | 0.076934777 | 0.435987497 |
| smohc222.pcaac402               | -0.067677523 | 0.086630229 | 0.436019286 |
| pcaec401.smohc141               | -0.013460896 | 0.017234003 | 0.436111221 |
| lysopcac203.taurine             | 0.05313674   | 0.068038136 | 0.436158958 |
| citruline.kynurenine            | -0.033343405 | 0.04269436  | 0.436162181 |
| c4.lysopcac203                  | -0.014676166 | 0.018793257 | 0.436192635 |
| pcaac404.pcaac406               | -0.039905241 | 0.051102226 | 0.436214169 |
| pcaec361.smc181                 | -0.004912717 | 0.006291231 | 0.436218374 |
| pcaac401.pcaec444               | -0.131239413 | 0.168076851 | 0.436249737 |
| c4.c14                          | -0.039195786 | 0.050198931 | 0.436261824 |
| kynurenine.glycine              | -0.018057275 | 0.023127341 | 0.436281222 |
| smc160.c10                      | -0.001366421 | 0.001750104 | 0.436287471 |
| c182.lysopcac181                | -0.039353964 | 0.050411708 | 0.436354406 |
| pcaac422.c181                   | -0.023466354 | 0.030067304 | 0.436466047 |
| lysopcac170.leucine             | 0.005671524  | 0.007269508 | 0.436630812 |
| lysopcac280.pcaec445            | 0.10619147   | 0.136124402 | 0.436674153 |
| lysopcac280.glutamicacid        | 0.029894724  | 0.038322282 | 0.436685173 |
| pcaac384.smc261                 | -0.038434716 | 0.049270492 | 0.436691919 |

|                                |              |             |             |
|--------------------------------|--------------|-------------|-------------|
| leucine.pcaec420               | 0.054355343  | 0.069683763 | 0.436719461 |
| smohc241.pcaec421              | 0.00143377   | 0.001838187 | 0.436741374 |
| pcaac420.pcaec364              | -0.012128781 | 0.015550397 | 0.436756318 |
| c51dc.c102                     | -0.02957894  | 0.037927269 | 0.436803333 |
| glutamine.c2                   | -0.043627231 | 0.055944625 | 0.436836789 |
| methioninesulfoxide.pcaec425   | 0.006033918  | 0.007738133 | 0.436874801 |
| glycine.c10                    | -0.00422788  | 0.005422163 | 0.436888621 |
| asparagine.c102                | 0.045156264  | 0.057924091 | 0.436984798 |
| c142.threonine                 | 0.023651536  | 0.030341902 | 0.437029292 |
| pcaec420.pcaac381              | -0.016060282 | 0.020603413 | 0.437031972 |
| methioninesulfoxide.c12        | 0.101478115  | 0.130201445 | 0.43709244  |
| pcaec385.pcaec363              | -0.031783932 | 0.040780388 | 0.437092781 |
| pcaac386.spermidine            | -0.054819381 | 0.070339429 | 0.437114873 |
| pcaec420.pcaec421              | -0.002608083 | 0.003347357 | 0.437236886 |
| pcaec362.glutamicacid          | 0.033517903  | 0.043022279 | 0.437274819 |
| pcaac385.c10                   | -0.002718078 | 0.003489267 | 0.437333518 |
| methionine.pcaac323            | 0.095548992  | 0.122693341 | 0.437462583 |
| lysopcac204.pcaec364           | -0.020164652 | 0.025893968 | 0.437476252 |
| pcaec404.c141                  | 0.033481851  | 0.04300275  | 0.43755933  |
| pcaac404.glutamicacid          | -0.053281976 | 0.068434419 | 0.437567221 |
| pcaac402.pcaec401              | 0.061573781  | 0.079088332 | 0.437590731 |
| pcaec385.pcaac385              | -0.032842891 | 0.042188603 | 0.437629853 |
| c2.smohc141                    | 0.015670002  | 0.020129513 | 0.437640856 |
| asymmetricdimethylarginine.pca | -0.052912799 | 0.067971409 | 0.437642253 |
| smohc222.c10                   | -0.001585771 | 0.002037405 | 0.437717181 |
| pcaac365.serine                | -0.032063221 | 0.041195758 | 0.437726271 |
| pcaac323.arginine              | 0.026155384  | 0.033610122 | 0.437793273 |
| pcaec341.smc161                | -0.046068935 | 0.059199487 | 0.437794095 |
| c10.c142                       | 0.05875965   | 0.075518111 | 0.43785951  |
| serine.pcaec361                | 0.005259141  | 0.00676162  | 0.43803214  |
| pcaac322.ornithine             | 0.029389253  | 0.037795243 | 0.438150708 |
| pcaac403.transhydroxyproline   | 0.055789322  | 0.071756784 | 0.438217302 |
| pcaac363.c14                   | -0.027945348 | 0.03594457  | 0.438229796 |
| c182.pcaec322                  | 0.051604542  | 0.066389887 | 0.438324748 |
| smohc221.lysopcac170           | -0.011485894 | 0.014777132 | 0.438336695 |
| pcaac361.pcaec301              | -0.068197143 | 0.087759338 | 0.4384438   |
| pcaec381.valine                | -0.025380076 | 0.032664596 | 0.438503989 |
| c10.lysopcac161                | 0.066658733  | 0.085796985 | 0.438536183 |
| lysopcac181.pcaec343           | 0.07252227   | 0.093346625 | 0.438549077 |
| pcaec386.c16                   | 0.034923912  | 0.044952931 | 0.438557386 |
| c4.pcaac380                    | -0.02086846  | 0.026863576 | 0.438597679 |
| smc261.lysopcac281             | -0.012007913 | 0.015459603 | 0.438658036 |
| pcaac281.spermidine            | -0.055236004 | 0.07111407  | 0.438660644 |

|                                |              |             |             |
|--------------------------------|--------------|-------------|-------------|
| pcaec402.c10                   | -0.002006128 | 0.002583604 | 0.438801601 |
| pcaec444.smc241                | -0.02383936  | 0.03070323  | 0.438824918 |
| pcaec363.pcaac281              | 0.001469741  | 0.001893548 | 0.438978766 |
| pcaac404.pcaac322              | 0.065536912  | 0.084438777 | 0.439000003 |
| pcaec445.lysopcac181           | -0.056705782 | 0.073079223 | 0.439116317 |
| pcaec342.pcaec385              | -0.054438304 | 0.070157467 | 0.439119191 |
| pcaec301.pcaac422              | -0.032891075 | 0.042403612 | 0.439282651 |
| pcaec424.lysopcac160           | -0.022330159 | 0.028790864 | 0.439322707 |
| pcaec321.pcaec342              | -0.115737167 | 0.149240582 | 0.439376525 |
| pcaac385.c102                  | 0.024848773  | 0.032043022 | 0.439391701 |
| smc261.smohc221                | -0.044093342 | 0.056871796 | 0.439491984 |
| pcaac402.smohc241              | 0.063635624  | 0.082095546 | 0.439592218 |
| smc241.creatinine              | -0.005379733 | 0.006940873 | 0.43962801  |
| glutamicacid.pcaec406          | -0.008705877 | 0.011233051 | 0.439661483 |
| pcaac320.pcaac422              | -0.024723421 | 0.031900588 | 0.439666667 |
| lysopcac170.smc240             | -0.037521025 | 0.048422072 | 0.439749214 |
| pcaac320.pcaac405              | 0.047085322  | 0.060775505 | 0.439827352 |
| pcaac422.pcaac381              | 0.035246113  | 0.045497624 | 0.439863558 |
| pcaac421.pcaac406              | -0.033736427 | 0.043556466 | 0.439943471 |
| smc181.smc240                  | 0.026241179  | 0.033883577 | 0.439998481 |
| methioninesulfoxide.c51        | -0.09023458  | 0.116515778 | 0.440004612 |
| pcaec445.pcaec404              | -0.009040285 | 0.011676748 | 0.440139154 |
| pcaac386.methioninesulfoxide   | 0.022162941  | 0.028627121 | 0.440150165 |
| lysopcac140.pcaac403           | 0.006519235  | 0.008420729 | 0.440153088 |
| smohc141.smohc241              | 0.107841919  | 0.139312033 | 0.440203462 |
| smohc222.smohc161              | 0.018622821  | 0.024058762 | 0.440231606 |
| pcaec424.tyrosine              | -0.040000188 | 0.05170133  | 0.440454132 |
| pcaac406.pcaac344              | -0.046465666 | 0.060069954 | 0.440543873 |
| pcaac365.creatinine            | -0.008916144 | 0.011526896 | 0.440554534 |
| smc240.pcaec425                | -0.002935533 | 0.003795386 | 0.440589867 |
| pcaac362.arginine              | 0.053379072  | 0.069024148 | 0.440654027 |
| methioninesulfoxide.valine     | -0.021062329 | 0.027235857 | 0.440658878 |
| pcaac364.c14                   | 0.034826731  | 0.045035483 | 0.440666709 |
| leucine.pcaec341               | -0.034528721 | 0.044663752 | 0.440805944 |
| alphaaminoadipicacid.lysopcac1 | -0.06497589  | 0.084051667 | 0.440826281 |
| leucine.c4                     | 0.020440149  | 0.026441961 | 0.440842551 |
| glycine.pcaac240               | -0.010205453 | 0.013202613 | 0.440861437 |
| glutamine.creatinine           | -0.041762341 | 0.05403013  | 0.440886218 |
| c3.pcaac386                    | -0.024211072 | 0.031323356 | 0.44088946  |
| smohc161.ornithine             | 0.020453328  | 0.026466528 | 0.440972101 |
| c18.c10                        | -0.031045068 | 0.040179885 | 0.44105931  |
| pcaec385.c10                   | -0.00208745  | 0.002701808 | 0.441082839 |
| pcaac425.pcaec362              | 0.00897363   | 0.011614693 | 0.441083954 |

|                        |              |             |             |
|------------------------|--------------|-------------|-------------|
| pcaac364.pcaac386      | -0.017161867 | 0.022214385 | 0.441115668 |
| pcaac402.pcaec343      | 0.076631417  | 0.099213456 | 0.441214282 |
| phenylalanine.pcaac380 | -0.080274564 | 0.103943058 | 0.44127076  |
| lysopcac181.tyrosine   | -0.041108866 | 0.0532364   | 0.441329151 |
| c16.smc260             | 0.023971573  | 0.031049669 | 0.441420721 |
| c162.pcaac424          | 0.006170444  | 0.007992624 | 0.441433867 |
| c51.c0                 | 0.000486936  | 0.000630743 | 0.441441689 |
| c101.taurine           | -0.040029116 | 0.0518515   | 0.441446838 |
| lysopcac170.pcaec361   | 0.005147949  | 0.006669166 | 0.441501364 |
| pcaec402.pcaec383      | -0.127055338 | 0.164616462 | 0.441546539 |
| isoleucine.pcaac403    | 0.015944387  | 0.020658049 | 0.441547711 |
| pcaac386.alanine       | -0.012639995 | 0.016377116 | 0.441557203 |
| pcaec401.pcaac240      | -0.014777257 | 0.019149102 | 0.441624421 |
| c142.c0                | -0.000709779 | 0.000919772 | 0.441626881 |
| c182.c102              | 0.044148956  | 0.057217207 | 0.441678591 |
| pcaec425.pcaec446      | 0.052866114  | 0.068517705 | 0.441698745 |
| pcaec422.pcaec362      | 0.009759807  | 0.01264964  | 0.441710821 |
| pcaac366.h1            | 0.001586217  | 0.002055969 | 0.441728523 |
| c10.pcaec360           | -0.006517817 | 0.008448302 | 0.441742639 |
| smc240.pcaac341        | 0.008225542  | 0.010662322 | 0.44176364  |
| alanine.pcaec363       | 0.015284776  | 0.019813307 | 0.441774777 |
| pcaac362.creatinine    | -0.004265282 | 0.005529179 | 0.441790449 |
| pcaac421.c10           | -0.00206954  | 0.00268308  | 0.44183982  |
| h1.glutamicacid        | 0.038192121  | 0.04951769  | 0.441867816 |
| lysopcac160.pcaac281   | -0.004274916 | 0.005542835 | 0.441886483 |
| smohc161.smc240        | 0.019429937  | 0.025203514 | 0.442080824 |
| glycine.pcaac321       | -0.02733212  | 0.035455828 | 0.442106646 |
| pcaec384.pcaac364      | -0.043462567 | 0.056384352 | 0.442136956 |
| histidine.c16          | -0.03608308  | 0.046820063 | 0.44222627  |
| c142.pcaac320          | -0.051820017 | 0.067253418 | 0.442318977 |
| smc181.c10             | -0.001800095 | 0.00233641  | 0.44235773  |
| pcaac403.pcaac381      | 0.03261299   | 0.04234177  | 0.442488379 |
| pcaec300.smohc221      | 0.063752519  | 0.08278181  | 0.442550416 |
| lysopcac280.pcaac403   | 0.011502502  | 0.014935975 | 0.442554308 |
| pcaec365.pcaec423      | -0.005619496 | 0.007297238 | 0.442575119 |
| pcaec401.pcaac404      | -0.007469692 | 0.009700756 | 0.442618843 |
| pcaec405.histidine     | -0.083261767 | 0.108135597 | 0.442640037 |
| pcaac386.pcaec386      | -0.012401569 | 0.01611131  | 0.442777525 |
| pcaec322.valine        | 0.054842116  | 0.071247463 | 0.442778533 |
| pcaac364.alanine       | -0.014662417 | 0.019050856 | 0.442834854 |
| c16.pcaac381           | -0.01409078  | 0.018308194 | 0.442836468 |
| pcaac363.c10           | -0.002108364 | 0.002739934 | 0.442924685 |
| pcaac421.h1            | 0.002609017  | 0.003390632 | 0.442934119 |

|                          |              |             |             |
|--------------------------|--------------|-------------|-------------|
| c3.pcaac385              | 0.069121995  | 0.089837232 | 0.442972304 |
| alanine.pcaac320         | -0.016007922 | 0.02080565  | 0.44297884  |
| methionine.pcaec445      | -0.055284611 | 0.071856467 | 0.442994833 |
| pcaec321.lysopcac280     | -0.008282441 | 0.010765348 | 0.443003316 |
| lysopcac161.pcaec361     | 0.005761592  | 0.007489007 | 0.443015931 |
| c101.lysine              | 0.044092326  | 0.057313776 | 0.443030891 |
| glycine.pcaec362         | 0.01321589   | 0.017178924 | 0.443034607 |
| smohc221.pcaac384        | 0.042231048  | 0.054917404 | 0.443221714 |
| lysopcac161.pcaac420     | -0.060226161 | 0.078330719 | 0.443293785 |
| c8.serine                | 0.014241957  | 0.018525729 | 0.443355292 |
| c3.prolinr               | 0.012213943  | 0.015891853 | 0.443473644 |
| pcaec360.arginine        | 0.052880269  | 0.068828617 | 0.443637814 |
| pcaac401.pcaec361        | 0.018138069  | 0.023613795 | 0.443741843 |
| c51.pcaec443             | -0.038014377 | 0.049507279 | 0.443895191 |
| pcaac403.serotonin       | -0.100937677 | 0.131486363 | 0.444006408 |
| pcaec321.leucine         | -0.004612586 | 0.006009476 | 0.444074178 |
| pcaec343.smc180          | -0.009375669 | 0.012215707 | 0.444099503 |
| smc181.smohc161          | -0.020388923 | 0.02656752  | 0.444141791 |
| pcaac366.pcaac362        | 0.05788561   | 0.075427214 | 0.444142548 |
| arginine.pcaac321        | 0.015511159  | 0.020212068 | 0.444152018 |
| pcaac281.pcaec362        | 0.022000845  | 0.028672668 | 0.44421718  |
| pcaac240.pcaac381        | 0.057962097  | 0.075541873 | 0.444232784 |
| lysopcac170.pcaac386     | 0.02510773   | 0.032723961 | 0.444248236 |
| pcaec382.pcaec380        | 0.098533873  | 0.128427214 | 0.444261935 |
| pcaac323.serine          | -0.019609538 | 0.025560758 | 0.444298405 |
| pcaac422.pcaec340        | -0.055105361 | 0.071841074 | 0.444374404 |
| pcaac402.pcaac281        | -0.004140635 | 0.005398326 | 0.444388211 |
| pcaec422.c4              | -0.030358495 | 0.039580693 | 0.444399723 |
| pcaec382.c10             | -0.003631641 | 0.004735081 | 0.444422046 |
| glutamicacid.pcaac363    | -0.013673933 | 0.017829814 | 0.444452274 |
| pcaac240.c51             | -0.101441307 | 0.132277    | 0.444469146 |
| c0.pcaec361              | -0.009455609 | 0.01233192  | 0.44454418  |
| smohc161.pcaac384        | 0.03333078   | 0.043477322 | 0.444623817 |
| citruline.c10            | 0.003098712  | 0.004042232 | 0.444647517 |
| h1.c101                  | -0.026070451 | 0.034017958 | 0.444772793 |
| creatinine.lysine        | 0.062364178  | 0.081381887 | 0.444807162 |
| pcaac240.pcaac321        | 0.010857609  | 0.014171236 | 0.444891875 |
| pcaec343.c10             | -0.002082396 | 0.002717966 | 0.444899405 |
| pcaac360.lysopcac204     | 0.032877823  | 0.04291347  | 0.444909703 |
| pcaac321.pcaac405        | 0.056132503  | 0.073285106 | 0.44502554  |
| pcaac365.pcaec384        | -0.039919523 | 0.052120941 | 0.445052295 |
| glutamicacid.lysopcac203 | 0.002634659  | 0.003440151 | 0.44507964  |
| c14.lysine               | 0.043677739  | 0.057031686 | 0.445082807 |

|                                |              |             |             |
|--------------------------------|--------------|-------------|-------------|
| pcaec384.c182                  | -0.019834036 | 0.025898926 | 0.445098056 |
| pcaec363.c10                   | -0.001651746 | 0.002156967 | 0.445129014 |
| pcaec385.lysopcac181           | 0.037271238  | 0.048672022 | 0.445134581 |
| pcaec362.c10                   | -0.0017417   | 0.002274519 | 0.445145757 |
| lysine.lysopcac182             | -0.021807987 | 0.028485767 | 0.44524625  |
| smc180.asparagine              | 0.007816978  | 0.010211717 | 0.445295961 |
| smc181.pcaec301                | 0.060342492  | 0.078829192 | 0.445300087 |
| pcaec343.taurine               | -0.045490207 | 0.059437947 | 0.445385886 |
| c141.c14                       | 0.050094036  | 0.065454176 | 0.445391589 |
| smc240.serine                  | -0.025576312 | 0.033420052 | 0.445410263 |
| prolinr.pcaec380               | 0.036347097  | 0.047502793 | 0.445494132 |
| pcaac365.c8                    | -0.038280905 | 0.050035444 | 0.445542369 |
| glutamine.c0                   | 0.000443892  | 0.000580241 | 0.445579507 |
| smohc161.putrescine            | -0.025229492 | 0.032979309 | 0.445581574 |
| c101.smohc221                  | 0.037262998  | 0.048712135 | 0.445609078 |
| alanine.ornithine              | 0.044308267  | 0.057923097 | 0.445617073 |
| pcaec322.c181                  | -0.008974431 | 0.011732103 | 0.445619067 |
| pcaec343.kynurenine            | -0.005016831 | 0.00655863  | 0.445634485 |
| smc240.glutamicacid            | 0.02090972   | 0.027336672 | 0.445648855 |
| pcaac364.pcaec420              | -0.018268911 | 0.023884312 | 0.445651635 |
| smc202.pcaec365                | 0.023217736  | 0.030355514 | 0.445670078 |
| asparagine.pcaac343            | -0.017242309 | 0.022550002 | 0.445809557 |
| pcaac323.c8                    | -0.037006684 | 0.048402013 | 0.445843099 |
| pcaac341.asparticacid          | 0.043723505  | 0.057187699 | 0.445847704 |
| pcaac366.pcaac300              | -0.048559635 | 0.063514254 | 0.445856208 |
| c51dc.pcaec446                 | -0.046745223 | 0.061142526 | 0.445867023 |
| pcaec384.pcaac402              | -0.020599895 | 0.026948477 | 0.445932958 |
| pcaac381.isoleucine            | 0.01800997   | 0.023564112 | 0.446004936 |
| pcaac344.c102                  | 0.028551801  | 0.037361383 | 0.446058588 |
| pcaec365.pcaec385              | 0.084567952  | 0.110664141 | 0.446070772 |
| c14.pcaac341                   | -0.013746262 | 0.017988274 | 0.446074715 |
| smc202.taurine                 | -0.042802216 | 0.056013298 | 0.446095634 |
| leucine.smohc222               | -0.004004727 | 0.005240809 | 0.446096119 |
| c3.pcaec445                    | 0.08390259   | 0.109803076 | 0.446110515 |
| smc181.c181                    | 0.009125679  | 0.011943857 | 0.446152613 |
| h1.smohc161                    | -0.016705267 | 0.021865605 | 0.446182571 |
| lysopcac280.transhydroxyprolin | 0.060483742  | 0.079169402 | 0.446193656 |
| pcaac362.glutamicacid          | 0.028213665  | 0.036935994 | 0.446268438 |
| pcaec403.pcaac406              | -0.051770221 | 0.06778113  | 0.446308659 |
| pcaac343.tyrosine              | 0.051266543  | 0.067165724 | 0.446606247 |
| lysopcac204.serine             | -0.07467868  | 0.097857685 | 0.446694643 |
| kynurenine.pcaec383            | 0.068021374  | 0.08913785  | 0.44671391  |
| pcaac424.smohc141              | -0.017399756 | 0.022801707 | 0.446721673 |



|                                     |              |             |             |
|-------------------------------------|--------------|-------------|-------------|
| creatinine.pcaac364                 | 0.050235587  | 0.065842201 | 0.446793383 |
| creatinine.h1                       | -0.000753053 | 0.000987073 | 0.44682558  |
| smc240.arginine                     | -0.029046398 | 0.03808094  | 0.446921319 |
| pcaec343.c182                       | -0.032314066 | 0.042365576 | 0.446927728 |
| h1.pcaac403                         | -0.006751147 | 0.008851375 | 0.446939928 |
| pcaac425.glutamicacid               | 0.051834504  | 0.067961112 | 0.446948625 |
| pcaac343.pcaec444                   | 0.081541695  | 0.10691661  | 0.446973598 |
| alphaaminoadipicacid.pcaac385       | -0.026846016 | 0.035209523 | 0.447093517 |
| pcaec443.smohc221                   | -0.067848154 | 0.089023692 | 0.447288997 |
| pcaec420.c10                        | -0.001717336 | 0.002253365 | 0.447298069 |
| pcaec444.acetylmethionine           | -0.059295641 | 0.077807086 | 0.447319071 |
| histidine.serine                    | -0.015420579 | 0.020236124 | 0.447350678 |
| pcaec385.lysopcac280                | 0.008741001  | 0.011470949 | 0.44736266  |
| smohc222.c101                       | -0.006752378 | 0.008861579 | 0.447379611 |
| pcaac421.isoleucine                 | 0.018443169  | 0.024204682 | 0.447389481 |
| pcaec385.c181                       | -0.009420153 | 0.012365863 | 0.447496611 |
| smohc222.pcaec424                   | 0.017839326  | 0.023424755 | 0.447632401 |
| citruline.serine                    | 0.04584511   | 0.060213698 | 0.447742655 |
| pcaec383.c142                       | 0.028834435  | 0.037874551 | 0.447777887 |
| pcaac320.pcaac323                   | 0.04064907   | 0.053394686 | 0.447789749 |
| pcaec364.ornithine                  | 0.033429162  | 0.043911993 | 0.447800432 |
| pcaec342.pcaec445                   | -0.033664504 | 0.044224086 | 0.447830673 |
| pcaec384.creatinine                 | 0.008975061  | 0.011792331 | 0.447909535 |
| c12.pcaac385                        | 0.003831023  | 0.005033943 | 0.447942219 |
| pcaac362.pcaec382                   | 0.00440854   | 0.005795082 | 0.44812084  |
| pcaec445.pcaec444                   | 0.118263676  | 0.155478073 | 0.448176071 |
| pcaec446.pcaac323                   | 0.059005406  | 0.077582023 | 0.448229809 |
| pcaec420.isoleucine                 | 0.020432448  | 0.026865452 | 0.448234442 |
| pcaac383.pcaec301                   | 0.044362643  | 0.058334517 | 0.44827037  |
| pcaac385.lysopcac170                | 0.007783174  | 0.010236172 | 0.448346093 |
| arginine.asymmetricdimethylarginine | 0.02022609   | 0.02660098  | 0.448351197 |
| asparagine.glutamicacid             | 0.041142384  | 0.054118703 | 0.448426502 |
| lysopcac161.pcaec380                | -0.049018917 | 0.064480376 | 0.448432678 |
| asparticacid.pcaac360               | 0.062523974  | 0.082250472 | 0.448461851 |
| pcaac341.pcaec322                   | 0.047044784  | 0.061891775 | 0.44849275  |
| lysopcac160.c142                    | -0.027455502 | 0.036120671 | 0.448497929 |
| smc240.smohc161                     | 0.031625441  | 0.041607902 | 0.448511287 |
| pcaac402.pcaac365                   | -0.080982834 | 0.106550841 | 0.448537012 |
| pcaec322.asymmetricdimethylarginine | 0.038677275  | 0.050892148 | 0.448569335 |
| pcaec446.c10                        | -0.001563377 | 0.002057276 | 0.448604544 |
| pcaec363.pcaac385                   | -0.020084336 | 0.026432384 | 0.448656835 |
| glutamine.pcaec340                  | 0.034866244  | 0.045896823 | 0.448759631 |
| pcaac381.pcaec383                   | 0.094375528  | 0.124233429 | 0.448761319 |

|                               |              |             |             |
|-------------------------------|--------------|-------------|-------------|
| citruiline.pcaac380           | 0.039642293  | 0.05218788  | 0.448794472 |
| methionine.pcaac320           | -0.015814998 | 0.020820431 | 0.44880456  |
| pcaec425.pcaac386             | 0.012797188  | 0.016851527 | 0.448913091 |
| smc240.serotonin              | -0.059981138 | 0.078989551 | 0.448944621 |
| pcaec365.pcaac406             | -0.040809319 | 0.053742873 | 0.44895148  |
| c51.transhydroxyproline       | -0.049953987 | 0.065795139 | 0.449016224 |
| methioninesulfoxide.pcaac361  | 0.067947069  | 0.089495921 | 0.449025458 |
| pcaac426.pcaac363             | -0.013026677 | 0.017160156 | 0.449082867 |
| c8.c10                        | 0.003067752  | 0.004041373 | 0.449104909 |
| smc241.asymmetricdimethylargi | -0.034893173 | 0.045967748 | 0.449109084 |
| pcaac366.smc181               | -0.009120066 | 0.012018194 | 0.449242942 |
| smohc221.leucine              | -0.006542773 | 0.008622279 | 0.449262764 |
| acetylornithoine.pcaac406     | -0.081295462 | 0.107149319 | 0.449328253 |
| c18.pcaec300                  | -0.039561963 | 0.05214478  | 0.449338559 |
| c141oh.pcaec443               | 0.058629535  | 0.077292591 | 0.449430661 |
| lysopcac280.putrescine        | -0.030424143 | 0.040108969 | 0.449432453 |
| pcaec421.pcaac323             | -0.134280104 | 0.177037074 | 0.449463099 |
| pcaec343.methionine           | 0.031580997  | 0.04163815  | 0.44947668  |
| c2.methioninesulfoxide        | 0.013454319  | 0.017739823 | 0.44949955  |
| arginine.kynurenine           | -0.026088179 | 0.034398719 | 0.449510965 |
| pcaec422.pcaac385             | -0.029926297 | 0.039465427 | 0.449579    |
| pcaac383.c0                   | -0.000909503 | 0.001199477 | 0.449604246 |
| lysopcac170.smc180            | -0.008742424 | 0.011529862 | 0.449608614 |
| glycine.pcaac406              | -0.033335885 | 0.043965051 | 0.449612096 |
| pcaac386.smc161               | -0.062148865 | 0.081970023 | 0.449639445 |
| lysopcac140.pcaec363          | 0.015880522  | 0.020945684 | 0.449647697 |
| smc180.pcaec322               | -0.064964335 | 0.085695348 | 0.449702346 |
| pcaac300.h1                   | 0.001503357  | 0.001983161 | 0.449716518 |
| pcaac380.glycine              | 0.072053374  | 0.095055445 | 0.449744445 |
| pcaec383.methionine           | -0.035463899 | 0.046785585 | 0.449747469 |
| pcaac406.c162                 | -0.038464186 | 0.050752386 | 0.44982489  |
| pcaac341.c101                 | -0.005307225 | 0.007002894 | 0.449835488 |
| lysopcac161.pcaac363          | 0.013691804  | 0.018069319 | 0.449909429 |
| pcaec365.c181                 | -0.009510542 | 0.012553676 | 0.449997472 |
| pcaec424.pcaac404             | -0.007127025 | 0.009408117 | 0.450027436 |
| pcaac240.lysopcac181          | -0.048110672 | 0.063514854 | 0.450068485 |
| c182.smc180                   | 0.014674879  | 0.019374657 | 0.450095157 |
| histidine.pcaac381            | 0.018340634  | 0.024215218 | 0.450110293 |
| pcaac365.c141                 | -0.036801011 | 0.0486037   | 0.450251399 |
| lysopcac204.citruiline        | -0.027764056 | 0.036679333 | 0.450385602 |
| lysopcac140.pcaac343          | -0.023027071 | 0.030428982 | 0.450500283 |
| c142.lysopcac161              | -0.073616615 | 0.097315392 | 0.450663628 |
| pcaac386.pcaac385             | -0.02956237  | 0.03907965  | 0.450669596 |

|                               |              |             |             |
|-------------------------------|--------------|-------------|-------------|
| smohc241.pcaac386             | 0.016780218  | 0.022183978 | 0.450701249 |
| arginine.pcaec386             | 0.007989693  | 0.010562835 | 0.450710173 |
| pcaec424.methionine           | -0.032001791 | 0.042312475 | 0.450755663 |
| lysopcac170.pcaac381          | -0.031680552 | 0.04189309  | 0.450813418 |
| kynurenine.pcaac383           | -0.003937905 | 0.005207437 | 0.450822878 |
| c51.alanine                   | 0.020488284  | 0.027096645 | 0.450876128 |
| c141oh.smc202                 | -0.03802559  | 0.050296942 | 0.450934048 |
| arginine.pcaac366             | -0.056682818 | 0.074986256 | 0.451001271 |
| pcaac426.c0                   | 0.001853687  | 0.002452748 | 0.451091005 |
| methionine.pcaec403           | -0.033780258 | 0.044700788 | 0.451128148 |
| pcaac362.smohc222             | 0.018933205  | 0.025055507 | 0.451156049 |
| alphaaminoadipicacid.pcaac422 | 0.016394153  | 0.021696198 | 0.451172281 |
| smohc221.pcaec385             | -0.039442777 | 0.052200051 | 0.451181415 |
| glutamine.pcaec342            | -0.049281943 | 0.065223455 | 0.451194452 |
| lysopcac203.smc261            | 0.035243142  | 0.046646993 | 0.451228835 |
| smohc221.h1                   | 0.0013251    | 0.001754133 | 0.451296305 |
| pcaec404.pcaec361             | 0.006371819  | 0.008435269 | 0.451318733 |
| pcaac361.c51                  | 0.051052495  | 0.06759089  | 0.45135587  |
| pcaac424.pcaac384             | 0.040597563  | 0.05375657  | 0.451418672 |
| c181.pcaac424                 | 0.006026209  | 0.007979986 | 0.451446059 |
| leucine.lysopcac160           | 0.017696629  | 0.02343466  | 0.451456655 |
| lysopcac280.pcaac360          | -0.051132396 | 0.067714719 | 0.451476212 |
| smc240.lysopcac161            | -0.056936479 | 0.07541804  | 0.451577788 |
| ornithine.pcaac424            | -0.022255191 | 0.02948041  | 0.451596049 |
| pcaac381.kynurenine           | 0.009000162  | 0.011923798 | 0.451660605 |
| smohc222.serotonin            | -0.069988467 | 0.092739803 | 0.45173897  |
| pcaec381.pcaac380             | 0.042041583  | 0.055713035 | 0.451778546 |
| glutamine.pcaec301            | -0.043613335 | 0.05780018  | 0.451811949 |
| pcaac421.c0                   | 0.000405513  | 0.000537468 | 0.451850691 |
| pcaec386.pcaec380             | -0.053862091 | 0.071394066 | 0.451883678 |
| pcaac425.smohc241             | 0.047349523  | 0.062767642 | 0.451926589 |
| lysopcac161.pcaac404          | -0.007782428 | 0.010318066 | 0.451992063 |
| pcaec381.serine               | -0.046672731 | 0.061886789 | 0.452045619 |
| c0.pcaac380                   | -0.066166404 | 0.08773751  | 0.452059164 |
| smc160.lysopcac181            | 0.045277895  | 0.060044763 | 0.452101909 |
| pcaec380.pcaac426             | -0.082892714 | 0.109927794 | 0.452104242 |
| pcaac360.methioninesulfoxide  | 0.014093302  | 0.018690772 | 0.452128489 |
| smc261.valine                 | -0.036687167 | 0.04865968  | 0.452170654 |
| c51dc.pcaec424                | 0.008793759  | 0.0116645   | 0.452208584 |
| c0.c51                        | 0.049862167  | 0.066140384 | 0.452212725 |
| lysopcac160.acetylnithoine    | 0.072815726  | 0.09661162  | 0.452325573 |
| lysine.pcaec360               | -0.005007363 | 0.006644742 | 0.452392972 |
| putrescine.pcaac300           | -0.032678855 | 0.043377009 | 0.452521473 |

|                               |              |             |             |
|-------------------------------|--------------|-------------|-------------|
| pcaec405.pcaac321             | 0.014561023  | 0.019331952 | 0.452616055 |
| c102.pcaac422                 | 0.017297765  | 0.022967278 | 0.452653129 |
| pcaac422.c142                 | 0.040453166  | 0.053732935 | 0.452828129 |
| pcaec341.pcaec360             | -0.005472489 | 0.007270013 | 0.452892792 |
| alanine.pcaec365              | -0.014464097 | 0.019215333 | 0.4528993   |
| c162.pcaac420                 | 0.080875407  | 0.10746951  | 0.453015791 |
| pcaac366.c101                 | -0.008088304 | 0.010748408 | 0.453034352 |
| lysopcac160.pcaac341          | 0.00414651   | 0.005511217 | 0.453115483 |
| pcaac321.valine               | 0.054943359  | 0.073035873 | 0.453173823 |
| pcaec384.smc161               | -0.043763173 | 0.058177434 | 0.453199506 |
| lysopcac204.c5                | -0.018048654 | 0.023995683 | 0.453243661 |
| c2.pcaec384                   | 0.045552359  | 0.060562679 | 0.453249796 |
| pcaac366.pcaac361             | 0.030593369  | 0.040674802 | 0.453253885 |
| prolinr.c51dc                 | -0.118778724 | 0.15792522  | 0.453269128 |
| lysopcac180.smc202            | 0.030933435  | 0.041130088 | 0.453288489 |
| c12.pcaec385                  | -0.044235529 | 0.058829796 | 0.453386696 |
| c162.lysopcac182              | -0.059763312 | 0.079484837 | 0.453411102 |
| lysopcac182.c4                | -0.032524745 | 0.043261487 | 0.453450443 |
| pcaec380.pcaac300             | -0.05000438  | 0.066511479 | 0.453451496 |
| c162.c8                       | -0.054873809 | 0.072989222 | 0.453456756 |
| pcaac344.glutamicacid         | 0.046351078  | 0.061654097 | 0.45346556  |
| pcaac240.lysopcac182          | -0.064813936 | 0.086218556 | 0.453496945 |
| lysine.pcaec380               | 0.044995097  | 0.05985849  | 0.453526226 |
| pcaec402.phenylalanine        | 0.041260308  | 0.054896679 | 0.453581266 |
| pcaec381.pcaec424             | 0.017478552  | 0.023255565 | 0.453589391 |
| smohc222.pcaac360             | 0.039014912  | 0.051911924 | 0.453605011 |
| pcaec421.lysopcac160          | 0.050600539  | 0.06732785  | 0.453608238 |
| methionine.lysine             | -0.060576963 | 0.080605676 | 0.453627461 |
| pcaac361.glutamicacid         | 0.02840743   | 0.037803733 | 0.453673748 |
| ornithine.pcaac380            | 0.046838121  | 0.062348572 | 0.453802706 |
| c18.lysopcac161               | -0.073696988 | 0.098104723 | 0.453816336 |
| glutamicacid.pcaec445         | 0.028319851  | 0.037703381 | 0.453867317 |
| lysopcac203.c51dc             | -0.118816925 | 0.158187333 | 0.45387154  |
| c14.lysopcac182               | -0.024356718 | 0.032430429 | 0.453913586 |
| c181.pcaec342                 | 0.058978416  | 0.078530383 | 0.453924667 |
| alphaaminoadipicacid.pcaec341 | -0.024383912 | 0.032469347 | 0.453951178 |
| c2.smc181                     | 0.011238308  | 0.014967093 | 0.454020018 |
| arginine.methioninesulfoxide  | 0.010712411  | 0.014271711 | 0.454177926 |
| c5.pcaec382                   | 0.018341639  | 0.024438415 | 0.454225726 |
| c141oh.c0                     | -0.001316762 | 0.001754524 | 0.454243439 |
| pcaac342.serine               | -0.012806482 | 0.017064155 | 0.454246526 |
| lysopcac170.lysopcac182       | 0.028264258  | 0.037661294 | 0.45424932  |
| smc260.lysopcac161            | -0.047101966 | 0.06277088  | 0.454313123 |

|                                 |              |             |             |
|---------------------------------|--------------|-------------|-------------|
| pcaec360.valine                 | 0.06497514   | 0.086592946 | 0.454329832 |
| pcaec385.smohc222               | -0.00297677  | 0.003967722 | 0.454392634 |
| pcaec402.c8                     | 0.0312425    | 0.041644402 | 0.454408182 |
| pcaac361.arginine               | 0.029272402  | 0.039022348 | 0.454453978 |
| pcaac341.pcaec444               | 0.06794815   | 0.09058666  | 0.454486724 |
| pcaec421.transhydroxyproline    | 0.036427213  | 0.048576427 | 0.454603874 |
| pcaec386.acetylmethionine       | -0.024897168 | 0.033201271 | 0.454609205 |
| pcaec385.acetylmethionine       | -0.055210303 | 0.073626508 | 0.454618857 |
| alanine.pcaec341                | 0.037802286  | 0.050416075 | 0.454657102 |
| pcaac342.c16                    | 0.035994173  | 0.048012486 | 0.454730718 |
| asparticacid.putrescine         | 0.019835822  | 0.026459309 | 0.454737255 |
| pcaac421.asparticacid           | 0.039938645  | 0.053281403 | 0.454793253 |
| pcaac383.leucine                | -0.0109481   | 0.014611359 | 0.45496896  |
| lysopcac203.c8                  | -0.037653561 | 0.050253737 | 0.45497977  |
| lysopcac160.pcaac422            | -0.045752003 | 0.061065939 | 0.455007351 |
| pcaec443.pcaec425               | 0.004424266  | 0.005906007 | 0.455073446 |
| pcaec422.smohc141               | -0.017318462 | 0.023121285 | 0.455125184 |
| pcaec383.pcaac404               | -0.00950077  | 0.012688842 | 0.455291503 |
| pcaac364.ornithine              | 0.020231649  | 0.027021085 | 0.455300115 |
| smohc241.smc160                 | 0.076898837  | 0.102706055 | 0.455305058 |
| smohc161.kynurenine             | -0.003962609 | 0.005292596 | 0.455316673 |
| pcaec421.smohc221               | -0.083583575 | 0.111641497 | 0.455334512 |
| pcaac365.lysopcac280            | 0.007772384  | 0.010382    | 0.455357345 |
| lysopcac180.pcaac341            | 0.003638052  | 0.004860407 | 0.455437104 |
| pcaec386.pcaac281               | 0.001162694  | 0.00155347  | 0.455471836 |
| pcaec444.h1                     | -0.002953636 | 0.003947368 | 0.455589284 |
| pcaac366.lysopcac181            | 0.032099413  | 0.042899196 | 0.455590703 |
| pcaec342.serine                 | -0.016098954 | 0.021515556 | 0.455593668 |
| pcaac300.c141oh                 | -0.063256602 | 0.084542073 | 0.455606209 |
| pcaec322.pcaac365               | -0.048583589 | 0.064940187 | 0.45566514  |
| pcaac344.smohc241               | 0.041057338  | 0.054895319 | 0.455790005 |
| lysopcac161.c14                 | 0.046037451  | 0.061555518 | 0.455801589 |
| putrescine.pcaac380             | 0.034441718  | 0.046055351 | 0.455842557 |
| pcaac384.pcaac281               | 0.001334804  | 0.001785026 | 0.4558756   |
| pcaec341.isoleucine             | 0.013064518  | 0.017471487 | 0.455885217 |
| smc261.glycine                  | -0.017265547 | 0.02309215  | 0.45593442  |
| c102.pcaac385                   | 0.002842968  | 0.003802458 | 0.455943137 |
| asymmetricdimethylarginine.crea | -0.004636769 | 0.006203401 | 0.45606934  |
| pcaac321.c12                    | 0.030064952  | 0.040227567 | 0.456119969 |
| smc260.pcaac426                 | 0.03446785   | 0.046123719 | 0.456168475 |
| pcaac361.pcaac426               | 0.049992343  | 0.066923734 | 0.456340842 |
| lysopcac140.lysopcac204         | -0.029059105 | 0.038906341 | 0.456404462 |
| pcaac420.lysopcac204            | 0.042691184  | 0.057177815 | 0.456560921 |

|                         |              |             |             |
|-------------------------|--------------|-------------|-------------|
| lysopcac180.pcaec406    | 0.014351107  | 0.019221944 | 0.456584241 |
| pcaac344.phenylalanine  | 0.043632999  | 0.058442545 | 0.456586467 |
| pcaec380.smc181         | -0.00907898  | 0.012161908 | 0.456638818 |
| pcaec425.c0             | 0.000572862  | 0.000767527 | 0.456719977 |
| lysopcac204.pcaac365    | 0.030070084  | 0.04028882  | 0.456727006 |
| asparticacid.serotonin  | -0.088470685 | 0.118539184 | 0.456740086 |
| c4.pcaac323             | -0.069312864 | 0.092879298 | 0.456784087 |
| pcaac365.lysopcac204    | -0.015043061 | 0.020158458 | 0.456800653 |
| pcaac401.lysopcac280    | -0.015740035 | 0.021092537 | 0.456802756 |
| pcaac366.smc261         | -0.038943216 | 0.052189357 | 0.456830695 |
| pcaec424.pcaac426       | -0.063502973 | 0.085103274 | 0.456832839 |
| pcaac366.pcaec362       | 0.013225727  | 0.017725985 | 0.45687276  |
| pcaac421.glycine        | 0.023489941  | 0.031483077 | 0.45687734  |
| smohc241.pcaec363       | -0.018829504 | 0.02523766  | 0.45689283  |
| pcaac380.pcaac240       | -0.014334153 | 0.019215744 | 0.456970377 |
| pcaec421.pcaec365       | 0.019174605  | 0.025705283 | 0.456981526 |
| kynurenine.pcaec445     | -0.042987615 | 0.057636959 | 0.457045378 |
| pcaec422.pcaac381       | 0.024498092  | 0.032847506 | 0.457058227 |
| lysopcac203.pcaec422    | 0.043084171  | 0.057770532 | 0.457077352 |
| phenylalanine.smc160    | 0.046614709  | 0.062506984 | 0.457094872 |
| prolinr.pcaac320        | -0.024504051 | 0.032863011 | 0.45716094  |
| methioninesulfoxide.c10 | -0.00488782  | 0.006555804 | 0.457203674 |
| pcaec363.lysopcac160    | -0.014179306 | 0.019018181 | 0.457207015 |
| prolinr.leucine         | 0.016982921  | 0.022783333 | 0.457300944 |
| asparagine.lysopcac161  | -0.042539607 | 0.057073788 | 0.457340591 |
| pcaac401.c141           | 0.03274827   | 0.043945664 | 0.457427887 |
| pcaec425.c18            | 0.029899581  | 0.040126055 | 0.457462723 |
| smohc222.pcaec360       | -0.004015223 | 0.005388791 | 0.457483697 |
| c162.pcaec445           | -0.068652948 | 0.092144069 | 0.457511133 |
| pcaac363.pcaec384       | 0.050651911  | 0.067990397 | 0.457556145 |
| smc241.smc160           | -0.128130526 | 0.171996381 | 0.457571604 |
| c141.alanine            | -0.018930766 | 0.025414818 | 0.457625465 |
| pcaec402.pcaac404       | -0.012629257 | 0.01695849  | 0.45771905  |
| c14.pcaac385            | 0.005482901  | 0.007362813 | 0.457743867 |
| c182.smohc161           | 0.006383914  | 0.008572907 | 0.457751797 |
| pcaac401.c10            | -0.002161345 | 0.002902688 | 0.45778822  |
| pcaac341.pcaac420       | -0.071824111 | 0.096478388 | 0.457874486 |
| pcaac426.c141           | -0.0328554   | 0.044135249 | 0.457894156 |
| asparagine.c18          | 0.036607178  | 0.049177283 | 0.457914261 |
| pcaec425.pcaac364       | -0.030207843 | 0.040582242 | 0.457932917 |
| pcaac320.pcaac365       | -0.049057916 | 0.065916135 | 0.458001429 |
| phenylalanine.taurine   | -0.034430431 | 0.046262664 | 0.458007158 |
| smc202.c10              | -0.002135197 | 0.002868989 | 0.458009913 |

|                                 |              |             |             |
|---------------------------------|--------------|-------------|-------------|
| pcaac240.pcaec360               | -0.007332384 | 0.009853547 | 0.458068368 |
| pcaec422.pcaec421               | -0.004843426 | 0.006508893 | 0.458075613 |
| pcaec322.smohc241               | -0.051321047 | 0.068975155 | 0.458119756 |
| asparticacid.smohc161           | -0.019327582 | 0.025979729 | 0.458181663 |
| c51.pcaec425                    | 0.004847235  | 0.006515589 | 0.458184254 |
| pcaec423.smc202                 | 0.040039059  | 0.053820413 | 0.458187916 |
| c8.pcaec423                     | 0.06479582   | 0.087113825 | 0.458267383 |
| pcaec383.transhydroxyproline    | 0.058470816  | 0.078614479 | 0.458291444 |
| pcaec342.smc202                 | 0.04658304   | 0.062635229 | 0.458319801 |
| smc260.smc261                   | 0.023641398  | 0.031788091 | 0.458320274 |
| pcaec422.pcaac404               | -0.008486589 | 0.011411442 | 0.458336873 |
| smc181.h1                       | 0.000908707  | 0.00122202  | 0.458385434 |
| acetylmithoine.pcaec383         | 0.059604166  | 0.080155848 | 0.45838978  |
| pcaac425.lysopcac280            | 0.007241055  | 0.009738423 | 0.458418903 |
| pcaec382.pcaec422               | -0.038571196 | 0.051874393 | 0.458422121 |
| c162.pcaac381                   | -0.005719982 | 0.007694863 | 0.458542203 |
| c51dc.pcaac365                  | -0.021316323 | 0.028676748 | 0.458553984 |
| pcaec385.c2                     | -0.029941336 | 0.040281413 | 0.458570418 |
| lysopcac181.histidine           | -0.044017419 | 0.059227971 | 0.458641419 |
| pcaac365.alanine                | -0.018388673 | 0.024744484 | 0.458667981 |
| lysopcac182.c12                 | 0.054051194  | 0.072741885 | 0.458720894 |
| smc260.pcaec425                 | -0.002295317 | 0.003089137 | 0.458736622 |
| smc180.h1                       | 0.001011136  | 0.001360843 | 0.458740939 |
| pcaec402.valine                 | -0.025547862 | 0.034388279 | 0.458800001 |
| pcaac342.pcaec422               | -0.018058358 | 0.024314034 | 0.458926843 |
| glycine.c102                    | -0.058570972 | 0.078872923 | 0.458995734 |
| pcaac365.spermidine             | -0.05771476  | 0.077743043 | 0.459129016 |
| smc261.c14                      | -0.032493759 | 0.043782636 | 0.45926038  |
| asymmetricdimethylarginine.lysc | -0.017794532 | 0.023982957 | 0.459378215 |
| kynurenine.smc202               | -0.054287037 | 0.073175701 | 0.45943456  |
| citruiline.pcaac404             | -0.007860862 | 0.010597062 | 0.459480507 |
| pcaac384.pcaec425               | -0.003548835 | 0.004785823 | 0.459640949 |
| smc260.h1                       | 0.00094306   | 0.001271968 | 0.459709092 |
| pcaec403.phenylalanine          | 0.052848639  | 0.071289707 | 0.459766975 |
| pcaec401.pcaac425               | -0.092556045 | 0.124861479 | 0.459798606 |
| methioninesulfoxide.acetylmith  | 0.07065611   | 0.095323943 | 0.459828088 |
| pcaac344.pcaec341               | 0.089756111  | 0.121093197 | 0.459831638 |
| c102.pcaec385                   | -0.057015924 | 0.076927547 | 0.459862571 |
| asparticacid.pcaac281           | 0.003008869  | 0.004059745 | 0.459872632 |
| pcaec444.smc260                 | 0.035089544  | 0.047349718 | 0.459918222 |
| lysopcac203.leucine             | 0.012197914  | 0.016460339 | 0.459932191 |
| putrescine.c8                   | -0.030496328 | 0.041154447 | 0.45994868  |
| pcaac363.pcaac320               | -0.026827743 | 0.03620402  | 0.459952227 |

|                                |              |             |             |
|--------------------------------|--------------|-------------|-------------|
| smc241.pcaec425                | -0.003812543 | 0.005145684 | 0.460009684 |
| pcaac402.spermidine            | 0.049541162  | 0.066883839 | 0.460140239 |
| smc202.asymmetricdimethylargi  | -0.01638264  | 0.022120064 | 0.460189195 |
| c12.pcaec365                   | -0.022305676 | 0.030124438 | 0.460293396 |
| lysopcac160.pcaec360           | -0.00431099  | 0.005822523 | 0.460325032 |
| pcaac384.c10                   | -0.002412642 | 0.003258723 | 0.460346052 |
| lysopcac181.glycine            | -0.011341475 | 0.015319428 | 0.460364992 |
| smc202.glycine                 | -0.028311833 | 0.038245335 | 0.460403594 |
| pcaec340.pcaac385              | -0.02265458  | 0.030603965 | 0.460415142 |
| c51.pcaac403                   | 0.006370292  | 0.008606865 | 0.46048106  |
| glutamine.transhydroxyproline  | -0.027835887 | 0.037609741 | 0.460490978 |
| glycine.smc240                 | -0.035387884 | 0.047817283 | 0.46052709  |
| pcaec363.smc180                | -0.009384779 | 0.012681367 | 0.460539165 |
| lysopcac204.pcaec425           | -0.003886064 | 0.005251185 | 0.460544619 |
| pcaac420.putrescine            | -0.028660625 | 0.038735275 | 0.460620532 |
| pcaec401.pcaec343              | 0.062674593  | 0.084710541 | 0.460646243 |
| smc261.c142                    | 0.039944862  | 0.054000249 | 0.460737848 |
| pcaac320.lysopcac204           | -0.012171103 | 0.016454124 | 0.460748152 |
| lysopcac181.pcaac404           | -0.005563232 | 0.007522779 | 0.46085767  |
| pcaec401.pcaac320              | 0.10237577   | 0.13845311  | 0.460913706 |
| lysopcac203.transhydroxyprolin | 0.031403593  | 0.042478306 | 0.460998489 |
| pcaec423.pcaac422              | -0.021830835 | 0.029541199 | 0.461173518 |
| pcaec301.pcaec444              | 0.094933232  | 0.128470513 | 0.461201758 |
| smc260.methionine              | 0.02820535   | 0.038179666 | 0.461320638 |
| c0.pcaec445                    | 0.041303754  | 0.055913854 | 0.461350778 |
| asparagine.pcaec360            | -0.005635581 | 0.00762948  | 0.461377938 |
| pcaac361.methionine            | -0.02754397  | 0.037291146 | 0.461401526 |
| pcaac364.c10                   | -0.002432969 | 0.003294337 | 0.461455397 |
| phenylalanine.pcaec443         | 0.076446905  | 0.103513034 | 0.461459123 |
| phenylalanine.pcaec424         | -0.048792308 | 0.06606789  | 0.461463184 |
| pcaac281.h1                    | 0.001193638  | 0.001616701 | 0.461584648 |
| pcaac361.pcaec361              | -0.010361539 | 0.014034292 | 0.461594068 |
| smohc241.h1                    | 0.005536883  | 0.007499647 | 0.461603609 |
| pcaec300.lysopcac182           | -0.015653808 | 0.021204318 | 0.461633288 |
| c14.kynurenine                 | -0.004579464 | 0.006205101 | 0.461766994 |
| c51.pcaac364                   | 0.054912465  | 0.074417774 | 0.461840618 |
| pcaac300.pcaac320              | -0.079881503 | 0.108268177 | 0.461890903 |
| pcaac403.c10                   | -0.002859231 | 0.003875628 | 0.461930232 |
| smc261.pcaac422                | -0.021635249 | 0.029336065 | 0.462081645 |
| pcaac343.pcaac380              | 0.038613614  | 0.05235962  | 0.46209819  |
| pcaec423.c10                   | -0.001819782 | 0.00246774  | 0.462122804 |
| pcaac401.smc161                | 0.079627036  | 0.107985934 | 0.46215026  |
| pcaac320.h1                    | 0.001279779  | 0.00173564  | 0.462168638 |



|                              |              |             |             |
|------------------------------|--------------|-------------|-------------|
| smc180.pcaac320              | 0.029859074  | 0.040496192 | 0.46218237  |
| pcaec381.pcaec361            | 0.009335045  | 0.012660947 | 0.462194656 |
| pcaec364.c8                  | -0.042134898 | 0.057154999 | 0.462258938 |
| pcaac362.smohc241            | 0.055868567  | 0.075793453 | 0.462312317 |
| pcaec384.c0                  | 0.000551861  | 0.000748729 | 0.462343919 |
| c2.smohc241                  | -0.036113248 | 0.049009226 | 0.462463659 |
| c16.pcaac383                 | 0.008263719  | 0.011217661 | 0.462582433 |
| pcaec361.pcaac384            | 0.042092729  | 0.057148058 | 0.462651959 |
| pcaac365.c4                  | -0.021122718 | 0.028679111 | 0.462674064 |
| pcaec343.serotonin           | -0.081210706 | 0.110277    | 0.462731415 |
| methioninesulfoxide.pcaec422 | -0.059296226 | 0.08052742  | 0.462777765 |
| pcaac323.smohc141            | -0.040813629 | 0.055430435 | 0.462804843 |
| glutamine.putrescine         | -0.030172809 | 0.040989278 | 0.462919429 |
| pcaac424.pcaec301            | 0.071228776  | 0.096764522 | 0.462925758 |
| lysopcac281.pcaac341         | -0.008832481 | 0.012000904 | 0.462998309 |
| pcaac321.pcaec380            | 0.054736406  | 0.074376763 | 0.463028886 |
| pcaac360.pcaac426            | 0.057096106  | 0.077592179 | 0.463080755 |
| asparticacid.tyrosine        | -0.051159707 | 0.069524841 | 0.46308127  |
| smc180.pcaac421              | -0.024567755 | 0.033389884 | 0.463119789 |
| pcaac342.spermidine          | -0.051488673 | 0.06997954  | 0.463130016 |
| c51dc.pcaac360               | 0.02674533   | 0.036350323 | 0.463130979 |
| pcaac422.pcaec380            | -0.095178427 | 0.129365753 | 0.463152026 |
| smohc222.pcaac300            | -0.054514828 | 0.074098069 | 0.463163795 |
| pcaec444.c14                 | -0.040843214 | 0.055521024 | 0.463210359 |
| smc202.lysopcac182           | 0.025296553  | 0.034393259 | 0.463286853 |
| smc161.pcaac363              | -0.005120562 | 0.006962169 | 0.463302216 |
| histidine.lysopcac161        | -0.061330084 | 0.083389012 | 0.463310779 |
| leucine.acetylmethionine     | 0.042501689  | 0.057794248 | 0.463355132 |
| pcaec321.c3                  | -0.02626092  | 0.035712751 | 0.463391033 |
| smc241.pcaac381              | 0.033818039  | 0.04599488  | 0.463440054 |
| c181.lysopcac161             | -0.05969642  | 0.081197747 | 0.463475631 |
| pcaec321.c51dc               | -0.09219863  | 0.125433784 | 0.463572582 |
| smc240.smc180                | -0.007611422 | 0.01035612  | 0.463614926 |
| pcaec423.smc181              | -0.007318124 | 0.009957502 | 0.46363478  |
| pcaec300.smc241              | -0.056768557 | 0.077251974 | 0.463687307 |
| leucine.c0                   | -0.000446504 | 0.000607627 | 0.463697063 |
| alphaaminoadipicacid.smc261  | -0.0103355   | 0.014065147 | 0.463698686 |
| serotonin.pcaac343           | -0.02718404  | 0.036994344 | 0.46370744  |
| pcaec403.pcaac384            | 0.037460288  | 0.050986865 | 0.463775099 |
| lysopcac281.smc161           | -0.05553288  | 0.075586461 | 0.463781892 |
| pcaec383.glycine             | 0.024110796  | 0.03282537  | 0.463888978 |
| pcaac342.pcaac321            | -0.026498586 | 0.036078332 | 0.463915336 |
| pcaec343.alanine             | -0.030747895 | 0.041864335 | 0.463920541 |

|                           |              |             |             |
|---------------------------|--------------|-------------|-------------|
| lysopcac203.pcaec364      | -0.009287467 | 0.012645826 | 0.463942198 |
| pcaec406.c0               | 0.000606057  | 0.000825215 | 0.463946069 |
| c14.methioninesulfoxide   | 0.015402103  | 0.020972538 | 0.463963848 |
| smc240.pcaec363           | -0.018945488 | 0.025805068 | 0.464095533 |
| pcaac362.pcaec322         | 0.046248998  | 0.062996714 | 0.464112326 |
| pcaac383.lysopcac160      | -0.025216372 | 0.034354129 | 0.464195249 |
| asparagine.c12            | -0.074803875 | 0.101911784 | 0.464199337 |
| pcaac240.pcaec401         | 0.026021302  | 0.035454087 | 0.4642373   |
| pcaec384.c10              | -0.001544491 | 0.002104522 | 0.464268975 |
| creatinine.acetylmithoine | -0.033474528 | 0.045623814 | 0.464380858 |
| pcaec340.putrescine       | -0.024395706 | 0.033255833 | 0.464460225 |
| pcaac300.c102             | 0.03536943   | 0.048231412 | 0.464611585 |
| pcaec385.pcaac341         | 0.005175005  | 0.007057644 | 0.46465984  |
| smohc241.acetylmithoine   | -0.017277178 | 0.023562593 | 0.464661209 |
| lysopcac160.lysopcac203   | 0.013567161  | 0.018503036 | 0.464665052 |
| pcaec445.c10              | -0.001422973 | 0.001940976 | 0.464736223 |
| serotonin.lysopcac203     | -0.010034228 | 0.013687922 | 0.464767179 |
| pcaec425.pcaac425         | 0.077404348  | 0.105603627 | 0.464828683 |
| smc241.pcaec380           | -0.042109136 | 0.057454672 | 0.464865145 |
| pcaec342.lysopcac160      | -0.013060919 | 0.017822604 | 0.464914795 |
| pcaac322.pcaec444         | 0.067511428  | 0.092132294 | 0.46495294  |
| pcaec446.taurine          | -0.027978882 | 0.038186054 | 0.464993807 |
| pcaec424.c10              | -0.001683457 | 0.002298029 | 0.46507488  |
| smc202.serine             | -0.038263578 | 0.052235487 | 0.465102172 |
| pcaec401.pcaac406         | -0.028232046 | 0.03854853  | 0.465189767 |
| pcaac366.pcaec402         | 0.032548173  | 0.044452148 | 0.465293014 |
| pcaac341.serine           | -0.021351066 | 0.029160778 | 0.465306771 |
| c141oh.pcaec444           | -0.064469981 | 0.088059082 | 0.465344775 |
| pcaac342.smc180           | -0.005701633 | 0.007788096 | 0.465360573 |
| ornithine.c141oh          | -0.079201074 | 0.108200318 | 0.465427693 |
| pcaec341.pcaac420         | -0.061011012 | 0.083371274 | 0.465541242 |
| lysopcac280.pcaac381      | 0.028665709  | 0.039180316 | 0.46564072  |
| glutamine.pcaec446        | -0.074366798 | 0.101654002 | 0.46568189  |
| lysopcac281.lysopcac161   | 0.06212887   | 0.084933292 | 0.465721974 |
| pcaac403.pcaac321         | 0.011273959  | 0.015413167 | 0.465753671 |
| c18.smohc141              | -0.017501128 | 0.023927629 | 0.465772339 |
| pcaec385.smohc241         | -0.056804801 | 0.077665657 | 0.465782941 |
| pcaec343.lysopcac160      | -0.024288685 | 0.033211574 | 0.465825463 |
| pcaac383.pcaac300         | -0.056905809 | 0.077827257 | 0.465917362 |
| c4.pcaec322               | -0.06207247  | 0.084900534 | 0.465954533 |
| arginine.smc181           | -0.005783761 | 0.007910968 | 0.465962622 |
| c51dc.isoleucine          | 0.026917224  | 0.036818918 | 0.465984614 |
| ornithine.lysine          | -0.080796892 | 0.110524853 | 0.466009772 |

|                                     |              |             |             |
|-------------------------------------|--------------|-------------|-------------|
| phenylalanine.pcaec322              | -0.057508966 | 0.078684338 | 0.466099383 |
| serine.c101                         | 0.010750483  | 0.014710862 | 0.466158176 |
| pcaac420.smc180                     | -0.010518909 | 0.014394013 | 0.466159309 |
| pcaac420.alanine                    | -0.009732004 | 0.01331866  | 0.466207501 |
| c141oh.pcaec425                     | -0.006958061 | 0.009523293 | 0.466249149 |
| pcaec423.pcaac240                   | -0.009747199 | 0.013341419 | 0.466273003 |
| putrescine.pcaec383                 | -0.04026019  | 0.055106213 | 0.466275615 |
| pcaac321.pcaac385                   | -0.033584023 | 0.045968289 | 0.466276517 |
| lysopcac181.pcaac341                | 0.003094401  | 0.004236759 | 0.466411204 |
| pcaac342.smc181                     | -0.010440435 | 0.014294744 | 0.466411936 |
| pcaec443.pcaec343                   | 0.060475837  | 0.082807909 | 0.466444832 |
| ornithine.histidine                 | 0.041983065  | 0.057492428 | 0.466492543 |
| pcaec402.arginine                   | -0.034307203 | 0.046981845 | 0.466500994 |
| pcaac405.c5                         | 0.010301433  | 0.014109118 | 0.466559856 |
| c181.acetylmethionine               | -0.012835546 | 0.017580462 | 0.466573894 |
| c162.pcaec343                       | -0.046612252 | 0.063847711 | 0.466603917 |
| lysine.lysopcac160                  | -0.013640116 | 0.018686595 | 0.466672409 |
| pcaec363.glutamicacid               | 0.027191223  | 0.037251415 | 0.466674351 |
| pcaec424.pcaac364                   | -0.033435776 | 0.045810142 | 0.466711437 |
| pcaac342.c102                       | 0.056119866  | 0.07689402  | 0.466737756 |
| pcaec362.pcaec301                   | -0.055031987 | 0.075406461 | 0.466755595 |
| pcaec425.c3                         | -0.021255355 | 0.029127436 | 0.466797092 |
| pcaec300.lysopcac181                | 0.034827968  | 0.047734432 | 0.466868501 |
| c142.alanine                        | -0.029625769 | 0.040610395 | 0.466933973 |
| pcaec300.pcaac360                   | -0.019096445 | 0.026179995 | 0.466984599 |
| pcaec421.pcaac421                   | -0.074878034 | 0.102673274 | 0.467072586 |
| alphaaminoadipicacid.c162           | 0.058257228  | 0.079893034 | 0.467130029 |
| pcaec383.asymmetricdimethylarginine | -0.020205512 | 0.027712811 | 0.467182868 |
| pcaac362.pcaac425                   | 0.084869453  | 0.116405348 | 0.467193938 |
| h1.pcaac420                         | 0.101372959  | 0.139043968 | 0.467202638 |
| pcaec362.lysopcac170                | -0.007661755 | 0.01050938  | 0.467221894 |
| pcaac322.pcaec405                   | -0.036234237 | 0.049704624 | 0.467251403 |
| c51dc.c8                            | 0.03418804   | 0.046903567 | 0.467306665 |
| smc180.pcaac361                     | 0.036329307  | 0.049841649 | 0.467310365 |
| pcaec300.pcaac380                   | 0.037372067  | 0.051276896 | 0.467350605 |
| lysopcac140.serotonin               | 0.063072564  | 0.08655493  | 0.467429107 |
| c51.c101                            | -0.005498019 | 0.007545903 | 0.467483989 |
| lysopcac160.pcaac404                | -0.004023915 | 0.005523172 | 0.467519615 |
| pcaac383.methionine                 | -0.025091509 | 0.034443514 | 0.467561468 |
| glycine.ornithine                   | 0.038984441  | 0.05352015  | 0.467607837 |
| c8.kynurenine                       | 0.007360772  | 0.010106293 | 0.467651297 |
| pcaec403.pcaec425                   | 0.005373239  | 0.007378027 | 0.467687662 |
| pcaec300.pcaac361                   | 0.074891536  | 0.102860074 | 0.467800245 |

|                                |              |             |             |
|--------------------------------|--------------|-------------|-------------|
| pcaec361.pcaac321              | 0.017705899  | 0.024319034 | 0.4678148   |
| lysopcac140.c14                | 0.042321601  | 0.058142725 | 0.467922166 |
| pcaec443.smc181                | -0.006655373 | 0.009143536 | 0.467930842 |
| pcaac422.c10                   | -0.002247144 | 0.003088311 | 0.46808258  |
| lysopcac181.pcaac323           | -0.086623841 | 0.119120271 | 0.468346442 |
| pcaac404.pcaac365              | -0.023870809 | 0.032826492 | 0.468355732 |
| pcaec364.pcaac424              | -0.026461061 | 0.036388535 | 0.468355736 |
| c8.leucine                     | -0.007868005 | 0.01082016  | 0.468367706 |
| glycine.pcaac422               | -0.027026551 | 0.03717113  | 0.468414826 |
| pcaac403.pcaec386              | 0.008856218  | 0.012180694 | 0.468423624 |
| smc180.taurine                 | 0.047053219  | 0.064719637 | 0.468447126 |
| pcaac341.lysopcac170           | 0.010244883  | 0.014094182 | 0.468535177 |
| smc260.glutamicacid            | 0.0323207    | 0.044465031 | 0.468540257 |
| lysopcac204.pcaac341           | 0.00373853   | 0.005143634 | 0.468572263 |
| pcaec382.pcaac321              | 0.015822286  | 0.021769319 | 0.468578841 |
| asymmetricdimethylarginine.pca | -0.005026287 | 0.006916488 | 0.468643    |
| pcaac402.lysopcac160           | 0.027806571  | 0.038268579 | 0.468700767 |
| spermidine.lysopcac181         | -0.151008133 | 0.207824399 | 0.468702087 |
| pcaac403.pcaac300              | -0.051101868 | 0.070338135 | 0.468761227 |
| pcaec321.c101                  | -0.006565436 | 0.009037404 | 0.468787813 |
| pcaac421.pcaac426              | -0.074112129 | 0.102036548 | 0.46887607  |
| kynurenine.tyrosine            | 0.05821354   | 0.08015549  | 0.46891979  |
| lysopcac281.c51                | 0.063196437  | 0.087026008 | 0.468968017 |
| c18.c14                        | -0.023495349 | 0.032357766 | 0.469009048 |
| lysine.c101                    | 0.010812889  | 0.014893718 | 0.469075175 |
| c5.h1                          | 0.003555564  | 0.004897835 | 0.469110275 |
| isoleucine.pcaac381            | 0.018520607  | 0.0255141   | 0.4691402   |
| asparticacid.smohc221          | 0.048607718  | 0.066975695 | 0.469229031 |
| pcaac341.lysopcac204           | -0.010619133 | 0.014631934 | 0.469229735 |
| glycine.pcaec340               | -0.023177711 | 0.031941034 | 0.469296872 |
| c4.c16                         | -0.021265445 | 0.029315417 | 0.469443068 |
| c141.c18                       | -0.022842743 | 0.031495077 | 0.469517444 |
| pcaac421.smc160                | -0.040069028 | 0.055255429 | 0.469590667 |
| c141oh.histidine               | -0.040651493 | 0.056060929 | 0.46960868  |
| pcaac364.pcaac383              | 0.004021668  | 0.005547103 | 0.469686496 |
| citruline.smohc222             | 0.001834982  | 0.002531063 | 0.469697806 |
| lysopcac160.pcaac360           | 0.019944473  | 0.027513745 | 0.469755007 |
| lysine.smohc222                | 0.00438182   | 0.006045167 | 0.4697822   |
| pcaac365.pcaac386              | -0.02420193  | 0.033395498 | 0.469868086 |
| pcaec444.c10                   | -0.001379929 | 0.001904228 | 0.469892922 |
| pcaec424.lysopcac204           | -0.025108415 | 0.034651881 | 0.469939113 |
| pcaec405.pcaec363              | 0.027264392  | 0.03763868  | 0.470072845 |
| c102.pcaac420                  | 0.052232489  | 0.072109719 | 0.470087661 |

|                          |              |             |             |
|--------------------------|--------------|-------------|-------------|
| pcaac344.lysine          | -0.058783616 | 0.081167028 | 0.470159351 |
| pcaac384.serotonin       | -0.058256632 | 0.080451801 | 0.470227766 |
| citruline.glycine        | 0.048592107  | 0.067128911 | 0.470384327 |
| smohc241.pcaec386        | 0.005499941  | 0.007598255 | 0.470396541 |
| pcaac424.c10             | -0.00389228  | 0.005377841 | 0.470445605 |
| pcaac341.smc180          | -0.00707662  | 0.009778272 | 0.470478534 |
| c182.isoleucine          | -0.019914167 | 0.02751821  | 0.47050077  |
| c141oh.h1                | -0.002123629 | 0.002934936 | 0.470563921 |
| pcaec424.pcaec340        | 0.035896954  | 0.04962188  | 0.470661484 |
| pcaec445.pcaec365        | 0.016042543  | 0.022177742 | 0.470690552 |
| pcaac363.methionine      | -0.024288549 | 0.033585012 | 0.470792336 |
| c18.pcaec444             | -0.05211077  | 0.07207443  | 0.470904269 |
| glycine.pcaac402         | -0.062067953 | 0.085854373 | 0.470946349 |
| smc261.pcaec342          | -0.066142036 | 0.091492308 | 0.470958602 |
| pcaac405.pcaec402        | 0.023620706  | 0.032677765 | 0.47101208  |
| histidine.pcaac425       | -0.062781231 | 0.086871754 | 0.471103082 |
| c51.c51dc                | 0.076822081  | 0.106309478 | 0.47114096  |
| lysopcac161.lysopcac182  | 0.020251207  | 0.028026248 | 0.471169646 |
| glutamicacid.taurine     | -0.030465576 | 0.042163795 | 0.471186192 |
| smc180.c142              | 0.059823487  | 0.08280413  | 0.47123713  |
| lysopcac181.pcaec385     | -0.022214914 | 0.030748584 | 0.471237332 |
| pcaec342.lysopcac170     | -0.006386765 | 0.008844885 | 0.471472462 |
| pcaec423.methionine      | -0.043868229 | 0.060752771 | 0.471477318 |
| kynurenine.smohc241      | 0.049143479  | 0.068059431 | 0.471483868 |
| pcaac386.arginine        | 0.026455601  | 0.036640126 | 0.471501085 |
| smohc222.pcaac344        | 0.06441853   | 0.089223749 | 0.471531997 |
| lysopcac281.smohc141     | 0.026473681  | 0.036678951 | 0.471667403 |
| pcaec422.pcaec360        | 0.003069535  | 0.004252922 | 0.471679923 |
| isoleucine.pcaec342      | -0.076442025 | 0.105917337 | 0.471700299 |
| pcaec424.putrescine      | -0.040851404 | 0.056610468 | 0.47175621  |
| pcaac321.pcaac420        | -0.090441116 | 0.125335985 | 0.471776688 |
| isoleucine.c10           | -0.0066596   | 0.0092303   | 0.471835538 |
| pcaac381.pcaac341        | 0.005714527  | 0.007922472 | 0.47195036  |
| pcaec444.c51dc           | -0.098406816 | 0.136467395 | 0.472075946 |
| pcaec381.lysopcac170     | -0.014648551 | 0.020315898 | 0.472114267 |
| pcaec322.spermidine      | -0.04990761  | 0.06923696  | 0.472246474 |
| pcaec445.c51dc           | -0.092414648 | 0.128220214 | 0.472291741 |
| c2.smc160                | 0.04613482   | 0.064018481 | 0.472353682 |
| isoleucine.lysopcac204   | -0.013150681 | 0.018254309 | 0.472496834 |
| glutamicacid.pcaac424    | 0.029527366  | 0.040990695 | 0.472540992 |
| pcaac364.pcaac425        | -0.072796645 | 0.101072806 | 0.472604485 |
| pcaac381.pcaac406        | -0.023382389 | 0.032474647 | 0.472739415 |
| c182.transhydroxyproline | 0.025713705  | 0.035713462 | 0.472751366 |

|                                 |              |             |             |
|---------------------------------|--------------|-------------|-------------|
| smohc141.citruline              | -0.031976786 | 0.044423538 | 0.472864326 |
| smohc161.pcaac240               | -0.007455456 | 0.010358406 | 0.472905437 |
| lysopcac280.smc160              | 0.071701619  | 0.099620606 | 0.472906935 |
| smohc221.pcaec343               | -0.063586976 | 0.088346577 | 0.472908297 |
| spermidine.c141oh               | 0.263775259  | 0.366500081 | 0.472927076 |
| pcaec362.threonine              | -0.039343794 | 0.054669266 | 0.472954534 |
| pcaec386.pcaec443               | -0.043727495 | 0.06076219  | 0.472966543 |
| pcaec382.glutamicacid           | 0.09742016   | 0.135380528 | 0.472995586 |
| pcaac385.histidine              | -0.042276626 | 0.058754928 | 0.473032827 |
| pcaec425.valine                 | 0.042053434  | 0.058452611 | 0.473092303 |
| pcaac281.pcaec446               | -0.022779552 | 0.031664269 | 0.473114517 |
| leucine.c10                     | -0.006460357 | 0.008980353 | 0.473127336 |
| methionine.pcaac360             | -0.060925735 | 0.084691303 | 0.473128496 |
| pcaac404.c0                     | -0.001216946 | 0.00169197  | 0.473213276 |
| c51dc.pcaac383                  | -0.01067981  | 0.01484936  | 0.473236484 |
| pcaec405.c10                    | -0.002503197 | 0.003480595 | 0.473250982 |
| pcaec363.c2                     | -0.032906777 | 0.045756716 | 0.473262194 |
| c51.pcaec301                    | -0.041501902 | 0.057709365 | 0.473271133 |
| pcaec363.acetylmethionine       | 0.020046353  | 0.027875509 | 0.47328041  |
| c102.c0                         | 0.00162162   | 0.002255145 | 0.473319037 |
| pcaec386.methioninesulfoxide    | 0.011529118  | 0.016038329 | 0.473458973 |
| pcaec340.prolinr                | -0.039163606 | 0.054486174 | 0.473500262 |
| pcaec301.pcaec422               | -0.014071033 | 0.019576261 | 0.473500383 |
| lysopcac161.pcaac364            | -0.044508801 | 0.061924423 | 0.473512892 |
| pcaec360.pcaec444               | 0.106627707  | 0.148395797 | 0.473650593 |
| pcaec363.pcaac323               | -0.069896785 | 0.097287907 | 0.473701545 |
| c51dc.pcaec444                  | 0.073192378  | 0.101882216 | 0.473732919 |
| smc181.pcaac380                 | 0.054713494  | 0.076160767 | 0.473737321 |
| smohc241.lysopcac170            | -0.012361244 | 0.017208153 | 0.473773134 |
| pcaac404.leucine                | -0.014542926 | 0.020246889 | 0.473808116 |
| pcaec360.pcaac322               | -0.031999688 | 0.044550753 | 0.47381096  |
| asymmetricdimethylarginine.tran | 0.015820089  | 0.02202676  | 0.473843863 |
| glycine.c5                      | 0.009705404  | 0.013513261 | 0.473848768 |
| methionine.pcaec382             | 0.008810463  | 0.012269967 | 0.473948475 |
| pcaac281.pcaac240               | -0.01086236  | 0.015128163 | 0.473966091 |
| alanine.pcaac406                | -0.036201848 | 0.050423026 | 0.474002864 |
| pcaac300.smc160                 | 0.042315851  | 0.058947488 | 0.474067955 |
| pcaec401.c10                    | -0.002234077 | 0.003112262 | 0.47408404  |
| lysopcac161.pcaec425            | -0.007125132 | 0.009927405 | 0.474149831 |
| pcaac421.pcaec360               | -0.002843697 | 0.003962205 | 0.47416089  |
| pcaac380.leucine                | -0.005860897 | 0.008166485 | 0.474178515 |
| c12.pcaac320                    | -0.069611086 | 0.096998776 | 0.474195575 |
| pcaac424.asymmetricdimethylar   | -0.023717038 | 0.033048817 | 0.474203315 |

|                        |              |             |             |
|------------------------|--------------|-------------|-------------|
| pcaac424.lysopcac180   | -0.070095529 | 0.097677898 | 0.474214006 |
| arginine.c10           | -0.00816333  | 0.011375987 | 0.474229995 |
| citruine.c142          | -0.034254238 | 0.047736637 | 0.474246028 |
| smohc161.c102          | 0.024538228  | 0.03420552  | 0.474363336 |
| glycine.pcaec422       | -0.024429283 | 0.034054466 | 0.474373853 |
| smohc141.pcaec386      | 0.015945465  | 0.022228376 | 0.474381164 |
| pcaec341.smc241        | -0.134710473 | 0.187846113 | 0.474513492 |
| pcaec342.histidine     | -0.051657113 | 0.072035535 | 0.474529537 |
| pcaac426.c51dc         | -0.101984458 | 0.142284172 | 0.47473865  |
| pcaac386.c5            | 0.007140368  | 0.009962218 | 0.474751686 |
| smc160.smc181          | -0.022950849 | 0.032023358 | 0.474784861 |
| lysopcac180.pcaec403   | 0.049882758  | 0.069605246 | 0.474808612 |
| serotonin.pcaec343     | 0.075220527  | 0.104964787 | 0.474824596 |
| c10.alanine            | -0.026536409 | 0.037030418 | 0.474833929 |
| smc241.acetylnithoine  | -0.014820159 | 0.020683797 | 0.474895802 |
| pcaac422.pcaac404      | -0.005452361 | 0.007610578 | 0.474952317 |
| pcaec443.pcaac321      | 0.010692681  | 0.014927545 | 0.475022034 |
| c8.c141                | 0.039391047  | 0.055012568 | 0.475187078 |
| pcaec422.c10           | -0.00205945  | 0.002877076 | 0.475324837 |
| pcaec421.lysopcac180   | -0.070069248 | 0.097892399 | 0.475346501 |
| pcaec444.prolinr       | -0.016143531 | 0.022555549 | 0.475380339 |
| pcaac320.lysopcac280   | 0.010608742  | 0.014823399 | 0.47540982  |
| pcaec446.pcaec362      | 0.012254847  | 0.017124223 | 0.475429149 |
| c8.pcaac281            | -0.024648611 | 0.034447751 | 0.475495527 |
| pcaec404.smc260        | 0.033453413  | 0.046753256 | 0.47549858  |
| c182.pcaac300          | 0.023092242  | 0.032290971 | 0.475745642 |
| pcaec445.pcaec301      | 0.043804469  | 0.061257329 | 0.475770624 |
| lysopcac160.c51dc      | 0.102729648  | 0.143663663 | 0.475782281 |
| glycine.smc261         | 0.012173825  | 0.017028947 | 0.475893406 |
| c141oh.pcaec420        | -0.017478716 | 0.024449942 | 0.475901088 |
| phenylalanine.c141oh   | -0.096505933 | 0.134998854 | 0.475908968 |
| pcaec424.pcaac424      | 0.015647401  | 0.021889733 | 0.475931449 |
| smohc241.pcaac361      | 0.044299042  | 0.061975001 | 0.475955744 |
| phenylalanine.pcaec341 | -0.03492536  | 0.04886355  | 0.475977972 |
| pcaec421.pcaac365      | -0.064295549 | 0.089964083 | 0.476022703 |
| pcaec425.asparagine    | 0.013372474  | 0.018713058 | 0.476068063 |
| smohc221.lysopcac204   | -0.029297283 | 0.041001265 | 0.476105485 |
| pcaec402.pcaec386      | 0.012579203  | 0.017604787 | 0.476113317 |
| pcaac401.pcaac364      | -0.046710217 | 0.065375076 | 0.476136321 |
| pcaec421.c10           | -0.002786029 | 0.00389951  | 0.476160798 |
| lysopcac170.pcaac341   | 0.003951305  | 0.005531092 | 0.476207262 |
| smc261.pcaec425        | -0.004620134 | 0.006467752 | 0.476236114 |
| creatinine.pcaac344    | 0.033161842  | 0.046430459 | 0.476302551 |

|                               |              |             |             |
|-------------------------------|--------------|-------------|-------------|
| smc240.leucine                | -0.005659045 | 0.007924109 | 0.476346105 |
| pcaac424.c14                  | 0.071062121  | 0.099507452 | 0.476356385 |
| pcaec300.serotonin            | -0.072433205 | 0.10144478  | 0.476431947 |
| c16.pcaec443                  | -0.060128255 | 0.084213976 | 0.476445694 |
| pcaec422.c51                  | 0.088804873  | 0.124388284 | 0.476483294 |
| c3.glycine                    | 0.020949407  | 0.029345089 | 0.4765046   |
| pcaec361.h1                   | 0.001107027  | 0.001551023 | 0.476602147 |
| pcaec403.c10                  | -0.003865175 | 0.005416125 | 0.476662474 |
| c10.c5                        | -0.008390528 | 0.011760485 | 0.476780385 |
| pcaac240.pcaac406             | -0.041399616 | 0.058029373 | 0.476796243 |
| ornithine.pcaec365            | 0.024857349  | 0.034845456 | 0.476836536 |
| kynurenine.pcaec386           | 0.004136098  | 0.00579835  | 0.476859042 |
| h1.pcaac343                   | 0.033755241  | 0.047335465 | 0.476992595 |
| pcaac384.pcaac425             | -0.061656347 | 0.086469574 | 0.477033203 |
| lysopcac203.smc202            | 0.043220534  | 0.060616686 | 0.477049946 |
| c5.pcaac404                   | -0.005971218 | 0.008377081 | 0.477179276 |
| pcaac320.lysopcac160          | -0.019872877 | 0.02788272  | 0.477224439 |
| pcaec443.c10                  | -0.003049815 | 0.004279721 | 0.4772929   |
| pcaec321.pcaec422             | -0.032284526 | 0.045305427 | 0.47730687  |
| pcaec406.pcaac404             | -0.004665649 | 0.006547862 | 0.477338912 |
| pcaec362.pcaac404             | -0.00339203  | 0.004760524 | 0.477346587 |
| smc260.pcaec301               | 0.041201084  | 0.057826933 | 0.477373386 |
| acetylmithoine.pcaac360       | 0.012201657  | 0.017125879 | 0.477386098 |
| pcaac362.pcaac381             | 0.028109676  | 0.039463442 | 0.477492435 |
| lysopcac281.pcaac386          | 0.01784363   | 0.025051522 | 0.47750437  |
| smc181.pcaac321               | 0.017421341  | 0.024462229 | 0.47756866  |
| leucine.pcaac381              | 0.01994086   | 0.028004322 | 0.477636191 |
| pcaec425.c10                  | -0.001782011 | 0.002502788 | 0.477669092 |
| pcaec384.pcaac404             | -0.008975583 | 0.012607149 | 0.477710107 |
| arginine.pcaac422             | 0.039996207  | 0.056191791 | 0.477811145 |
| pcaac421.methioninesulfoxide  | 0.016793383  | 0.023593605 | 0.477813213 |
| pcaec406.c8                   | -0.038487697 | 0.054074942 | 0.477831463 |
| pcaec421.c102                 | -0.030040613 | 0.042209476 | 0.4778588   |
| acetylmithoine.pcaec362       | 0.03640818   | 0.051163534 | 0.477919915 |
| glutamicacid.c0               | -0.000610516 | 0.000858007 | 0.477952131 |
| pcaec365.lysopcac170          | -0.009265811 | 0.013022195 | 0.477959557 |
| pcaac383.pcaec422             | -0.01457969  | 0.020493352 | 0.478024269 |
| lysopcac281.asymmetricdimethy | 0.0135618    | 0.019063144 | 0.478036876 |
| pcaec446.pcaac343             | -0.019652516 | 0.027629662 | 0.478118017 |
| pcaec365.arginine             | -0.042720917 | 0.060066657 | 0.478153912 |
| c102.pcaac426                 | 0.062203228  | 0.087461908 | 0.478167192 |
| lysopcac280.smc181            | -0.005215948 | 0.007334209 | 0.478181318 |
| lysopcac170.pcaec425          | -0.012875284 | 0.018104902 | 0.478200888 |



|                              |              |             |             |
|------------------------------|--------------|-------------|-------------|
| acetylmethionine.taurine     | -0.033622317 | 0.047298139 | 0.478379958 |
| c18.prolinr                  | 0.027869656  | 0.039213438 | 0.478467827 |
| c141oh.acetylmethionine      | -0.030070677 | 0.042318086 | 0.478548189 |
| c142.pcaac365                | 0.026420881  | 0.037184809 | 0.478584028 |
| c142.taurine                 | -0.028258892 | 0.039774973 | 0.478620937 |
| pcaac425.histidine           | -0.071199503 | 0.100231376 | 0.478693677 |
| c4.c141oh                    | -0.075808962 | 0.106721252 | 0.478697349 |
| pcaac363.lysopcac181         | 0.020520065  | 0.028892381 | 0.478772394 |
| pcaec365.pcaac365            | 0.031294552  | 0.044069011 | 0.478832998 |
| pcaac425.pcaac344            | 0.048345908  | 0.068082491 | 0.478844258 |
| pcaac422.pcaac322            | -0.06310188  | 0.088880113 | 0.478931765 |
| pcaac402.pcaec361            | 0.008318456  | 0.011720654 | 0.479080095 |
| pcaec421.glutamicacid        | 0.076047964  | 0.107152624 | 0.479086279 |
| isoleucine.pcaec383          | 0.066357967  | 0.093501876 | 0.479098438 |
| pcaac383.c142                | 0.040114728  | 0.056533775 | 0.479176116 |
| lysopcac281.pcaec446         | -0.0289317   | 0.04078019  | 0.479247996 |
| c142.glutamicacid            | -0.045833595 | 0.06460933  | 0.479284381 |
| pcaec362.pcaac323            | -0.09854096  | 0.138917015 | 0.479312001 |
| lysopcac180.pcaec444         | -0.08699396  | 0.122643913 | 0.479330428 |
| pcaac406.glycine             | 0.038791703  | 0.054699658 | 0.479420186 |
| c10.h1                       | -0.005190012 | 0.007319415 | 0.479483051 |
| arginine.lysopcac280         | -0.01573401  | 0.022192014 | 0.479532806 |
| pcaec343.pcaec342            | 0.119954106  | 0.169196767 | 0.479552661 |
| serine.pcaac404              | -0.004315272 | 0.006087135 | 0.479580775 |
| pcaac420.methioninesulfoxide | 0.016775414  | 0.023666706 | 0.479641148 |
| smc241.pcaac384              | 0.059082841  | 0.083356007 | 0.479652218 |
| c2.lysopcac170               | -0.011277008 | 0.015912622 | 0.479725231 |
| smc161.pcaec380              | -0.02886052  | 0.040732825 | 0.47981864  |
| smc181.pcaac426              | 0.038323045  | 0.054089897 | 0.479834563 |
| c141oh.pcaac344              | -0.045790826 | 0.064634603 | 0.479865316 |
| c141.pcaac281                | 0.00175589   | 0.002479737 | 0.480089191 |
| smc241.smc181                | -0.027738009 | 0.039172924 | 0.480091507 |
| pcaec382.c51dc               | 0.126633223  | 0.178843599 | 0.480106679 |
| pcaac426.pcaec421            | 0.001871141  | 0.002642826 | 0.480143415 |
| pcaac421.kynurenine          | 0.010142605  | 0.014328025 | 0.480218763 |
| lysopcac281.prolinr          | -0.026856197 | 0.037942636 | 0.480265357 |
| histidine.pcaac344           | 0.026259489  | 0.037100207 | 0.480272502 |
| pcaec420.pcaac422            | -0.042543085 | 0.060109459 | 0.480296485 |
| pcaec380.serine              | 0.050753266  | 0.071716196 | 0.48033625  |
| pcaec361.pcaac300            | -0.058969333 | 0.083326971 | 0.480342432 |
| pcaac323.c141oh              | -0.052191457 | 0.073754051 | 0.480369749 |
| smohc241.smc180              | 0.014559694  | 0.020575014 | 0.480371196 |
| pcaec383.c10                 | -0.002760062 | 0.003902104 | 0.48056501  |

|                                |              |             |             |
|--------------------------------|--------------|-------------|-------------|
| pcaac403.pcaac406              | -0.053280366 | 0.075342216 | 0.480656973 |
| asymmetricdimethylarginine.pca | 0.041156708  | 0.05820535  | 0.480708491 |
| pcaac321.pcaec444              | 0.054598334  | 0.077224253 | 0.480760984 |
| pcaac383.pcaac321              | -0.023471123 | 0.033199939 | 0.480790318 |
| c10.pcaec364                   | 0.01710327   | 0.024194681 | 0.480827962 |
| pcaac384.pcaec386              | 0.012949118  | 0.018321261 | 0.480903001 |
| c10.serine                     | 0.013357891  | 0.018901639 | 0.48094979  |
| arginine.acetylnornithine      | 0.03743201   | 0.052967181 | 0.480951946 |
| pcaac404.c10                   | -0.00326907  | 0.004626248 | 0.480993268 |
| pcaec380.c142                  | 0.036809951  | 0.052102487 | 0.481082503 |
| pcaac386.pcaac402              | 0.059815736  | 0.084680382 | 0.481157241 |
| c3.smc202                      | -0.047650715 | 0.067469341 | 0.481227487 |
| pcaec362.c142                  | 0.042437046  | 0.060106163 | 0.481365366 |
| pcaac343.c101                  | -0.005020031 | 0.007110548 | 0.481388342 |
| c2.lysopcac180                 | -0.067871907 | 0.096139227 | 0.481402368 |
| pcaec385.pcaac322              | -0.036891352 | 0.052258422 | 0.481423672 |
| asparticacid.smc261            | -0.060099527 | 0.085143046 | 0.481470443 |
| c141oh.alanine                 | -0.059724775 | 0.084616154 | 0.481491233 |
| pcaac366.lysopcac161           | 0.05491762   | 0.077810978 | 0.481521874 |
| c5.pcaac402                    | -0.040145108 | 0.056886822 | 0.481572124 |
| pcaec425.c14                   | -0.034255455 | 0.048541658 | 0.481577986 |
| c51.tryptophan                 | 0.018291964  | 0.025921049 | 0.481585408 |
| c142.pcaac426                  | -0.042109524 | 0.059673852 | 0.481596999 |
| pcaac360.asparagine            | -0.007003431 | 0.009924683 | 0.481599042 |
| lysopcac140.pcaec386           | 0.007353328  | 0.010421079 | 0.48162217  |
| methioninesulfoxide.pcaec402   | -0.121830807 | 0.172670295 | 0.481654196 |
| smc160.transhydroxyproline     | 0.024080074  | 0.034132668 | 0.481706487 |
| c10.pcaec386                   | 0.003255622  | 0.004616005 | 0.48182725  |
| pcaec321.pcaec386              | 0.011633503  | 0.016498531 | 0.481930452 |
| smc180.c14                     | -0.02248421  | 0.031887256 | 0.481935222 |
| pcaec361.methionine            | -0.030411989 | 0.043132268 | 0.481953315 |
| pcaac320.c101                  | -0.008294187 | 0.011763715 | 0.481966611 |
| pcaac341.pcaac381              | 0.015908598  | 0.02256434  | 0.481986813 |
| pcaec364.pcaac300              | -0.044453979 | 0.063072412 | 0.48212583  |
| lysopcac161.pcaac385           | 0.024566278  | 0.03486095  | 0.48219738  |
| pcaec425.h1                    | 0.002615486  | 0.003712308 | 0.482289731 |
| c182.c8                        | -0.03508098  | 0.049795317 | 0.48231509  |
| lysopcac140.lysopcac180        | -0.02997282  | 0.042547484 | 0.482344778 |
| pcaec404.pcaec425              | 0.007727447  | 0.010971929 | 0.482446127 |
| pcaac402.lysopcac181           | -0.049643945 | 0.070489357 | 0.482456489 |
| isoleucine.methionine          | -0.030027846 | 0.042641317 | 0.482505967 |
| leucine.pcaec301               | 0.036675945  | 0.052085928 | 0.482538851 |
| asparagine.pcaec425            | -0.006087268 | 0.008645153 | 0.48255008  |

|                                 |              |             |             |
|---------------------------------|--------------|-------------|-------------|
| pcaec403.kynurenine             | 0.007356623  | 0.010448404 | 0.482571426 |
| alanine.smohc222                | -0.00365198  | 0.005187942 | 0.482667302 |
| pcaec423.lysopcac181            | -0.058669069 | 0.083345519 | 0.482673658 |
| smohc161.smc161                 | 0.066063329  | 0.093851092 | 0.482679509 |
| c3.alanine                      | 0.007447536  | 0.010581695 | 0.482743654 |
| glutamicacid.transhydroxyprolin | -0.034720402 | 0.049335067 | 0.482772186 |
| pcaec405.pcaec321               | 0.027623128  | 0.039251609 | 0.482785894 |
| pcaac386.pcaec321               | -0.015008521 | 0.021327076 | 0.482794778 |
| pcaec404.c10                    | -0.002417494 | 0.003435357 | 0.482807995 |
| pcaac343.taurine                | -0.012805859 | 0.018199583 | 0.482854439 |
| pcaac281.c51dc                  | -0.089091899 | 0.12665043  | 0.482970847 |
| c101.h1                         | -0.000821843 | 0.001168381 | 0.482997999 |
| pcaac422.smc202                 | -0.048721326 | 0.069267598 | 0.48301367  |
| pcaec423.transhydroxyproline    | 0.030591506  | 0.043498052 | 0.483071933 |
| pcaac403.lysopcac204            | 0.055855154  | 0.079431682 | 0.483133835 |
| asparticacid.c2                 | -0.054387658 | 0.077344956 | 0.483134973 |
| pcaec362.pcaec445               | -0.019241124 | 0.027363838 | 0.483149983 |
| pcaec403.pcaac422               | -0.110007971 | 0.156458748 | 0.483179288 |
| putrescine.pcaec386             | 0.0053391    | 0.00759377  | 0.483192997 |
| pcaac363.c102                   | 0.030059786  | 0.042758626 | 0.483241785 |
| lysopcac160.pcaec383            | 0.090548026  | 0.128807416 | 0.483265953 |
| pcaac426.arginine               | 0.023979754  | 0.034114908 | 0.483303774 |
| pcaec444.pcaec365               | 0.013743779  | 0.019552972 | 0.483310927 |
| c101.alanine                    | -0.010692687 | 0.015214184 | 0.483366417 |
| ornithine.pcaec321              | 0.047825097  | 0.06805121  | 0.483384708 |
| smohc241.pcaec322               | -0.061312752 | 0.087253143 | 0.48343526  |
| smc240.lysopcac204              | 0.024644914  | 0.03507486  | 0.483473838 |
| pcaac321.serotonin              | -0.069663096 | 0.099155432 | 0.483519172 |
| c162.alanine                    | 0.028995081  | 0.041271166 | 0.483527884 |
| pcaec424.pcaac321               | 0.009255568  | 0.013175552 | 0.483571451 |
| pcaec423.c0                     | 0.000611931  | 0.000871221 | 0.48363248  |
| pcaec364.pcaac363               | -0.007636337 | 0.010873693 | 0.483698328 |
| pcaec421.pcaac406               | -0.037052956 | 0.05276178  | 0.483702953 |
| pcaac384.pcaac426               | 0.039931287  | 0.056865105 | 0.483739094 |
| lysopcac140.pcaec340            | -0.054807823 | 0.078050441 | 0.483739362 |
| lysopcac182.smc261              | 0.024862037  | 0.035409541 | 0.483790399 |
| pcaec300.ornithine              | 0.025418366  | 0.036212237 | 0.483915142 |
| pcaec362.acetylnithoine         | 0.060803466  | 0.086639473 | 0.483995258 |
| pcaac360.pcaec383               | 0.07358453   | 0.104872257 | 0.48408229  |
| pcaec444.pcaec403               | 0.037973659  | 0.054143316 | 0.484271445 |
| pcaec425.c141                   | 0.029939577  | 0.042699129 | 0.484382884 |
| pcaec420.h1                     | 0.001873188  | 0.002671664 | 0.4844102   |
| pcaec343.c141oh                 | -0.081557322 | 0.116337979 | 0.484468436 |

|                        |              |             |             |
|------------------------|--------------|-------------|-------------|
| pcaec404.c102          | -0.022795204 | 0.032525153 | 0.484586235 |
| c101.pcaec446          | -0.025945943 | 0.037027085 | 0.484660716 |
| pcaec380.c2            | 0.06544821   | 0.093426649 | 0.484784128 |
| pcaec384.putrescine    | -0.049048026 | 0.070030477 | 0.484877029 |
| serotonin.pcaac300     | -0.026590745 | 0.03796686  | 0.48488568  |
| pcaac362.pcaec343      | 0.061871876  | 0.088348201 | 0.484916043 |
| c2.pcaec342            | -0.04346035  | 0.06207505  | 0.485035902 |
| prolinr.alanine        | 0.015748339  | 0.022494529 | 0.485054247 |
| pcaac420.smc161        | 0.06085583   | 0.086927203 | 0.485065656 |
| pcaec422.h1            | 0.002299724  | 0.003285209 | 0.485099552 |
| lysopca280.histidine   | -0.046302584 | 0.066159637 | 0.485200482 |
| pcaec444.pcaac364      | -0.02936865  | 0.041963839 | 0.485203841 |
| c162.c10               | -0.013383076 | 0.019122872 | 0.485209804 |
| lysine.pcaac344        | -0.05687583  | 0.081287851 | 0.485310847 |
| smc161.h1              | 0.000931675  | 0.00133162  | 0.485328816 |
| pcaec321.pcaac365      | -0.035849789 | 0.051262559 | 0.485527281 |
| smc240.pcaec362        | 0.013490672  | 0.019292897 | 0.485577636 |
| smc261.pcaac386        | 0.012871011  | 0.018408053 | 0.485609055 |
| smc260.pcaec380        | -0.025747707 | 0.036825629 | 0.485625498 |
| smohc241.leucine       | -0.005438879 | 0.007779396 | 0.485650424 |
| pcaec365.pcaec362      | -0.020419896 | 0.029208243 | 0.485665906 |
| c141.pcaec444          | -0.101674746 | 0.145475432 | 0.485790897 |
| c18.pcaec421           | 0.001147693  | 0.001642407 | 0.485869783 |
| pcaac384.pcaec383      | 0.044909779  | 0.06426956  | 0.485878968 |
| glycine.smc181         | 0.048597527  | 0.069548421 | 0.485887683 |
| c10.pcaec301           | 0.050581876  | 0.072395768 | 0.485932942 |
| pcaac402.c10           | -0.004122127 | 0.005899983 | 0.485944166 |
| pcaac342.pcaac386      | -0.018607496 | 0.026633764 | 0.485959365 |
| pcaac424.pcaac240      | -0.019255732 | 0.027567784 | 0.486056816 |
| pcaec385.pcaac406      | -0.039034028 | 0.055887839 | 0.486089008 |
| pcaec420.c102          | 0.021224022  | 0.030388003 | 0.486089537 |
| pcaec402.pcaec360      | -0.00510823  | 0.00731476  | 0.486144862 |
| pcaec340.c102          | 0.022054308  | 0.031592249 | 0.486302623 |
| phenylalanine.pcaec301 | 0.027560854  | 0.039483787 | 0.486341722 |
| pcaec425.pcaac300      | 0.029315206  | 0.041997745 | 0.48634862  |
| pcaac240.pcaac403      | 0.012410304  | 0.017784091 | 0.486465088 |
| pcaec322.glycine       | -0.061334629 | 0.087898984 | 0.486493986 |
| pcaac342.pcaec402      | -0.019138809 | 0.027428449 | 0.48650222  |
| pcaec444.pcaec361      | 0.008994666  | 0.012890749 | 0.486509006 |
| c141.pcaac365          | 0.023446332  | 0.03360362  | 0.486527079 |
| c14.pcaec445           | 0.060257691  | 0.086366277 | 0.486547676 |
| glutamine.c51dc        | -0.090754372 | 0.130087975 | 0.486585631 |
| pcaec402.pcaac386      | 0.02277409   | 0.032646107 | 0.486606424 |

|                               |              |             |             |
|-------------------------------|--------------|-------------|-------------|
| alanine.pcaec420              | 0.028877472  | 0.041404891 | 0.486708705 |
| pcaac405.pcaec341             | 0.056630566  | 0.08121151  | 0.486783027 |
| pcaac341.glutamicacid         | 0.030417787  | 0.043622019 | 0.486794499 |
| kynurenine.alanine            | 0.040973989  | 0.058763245 | 0.4868139   |
| pcaec341.pcaac361             | -0.028058199 | 0.040252714 | 0.486951934 |
| pcaec406.pcaac403             | -0.00539323  | 0.007737813 | 0.486985874 |
| pcaac321.pcaec386             | 0.00719932   | 0.01033056  | 0.487049044 |
| arginine.pcaac240             | -0.011651859 | 0.016723266 | 0.487142641 |
| asparagine.lysopcac182        | -0.022000283 | 0.031582827 | 0.487239611 |
| pcaec425.smohc241             | 0.043037476  | 0.061786815 | 0.487265916 |
| lysopcac160.pcaac300          | -0.031470783 | 0.045185426 | 0.487307763 |
| pcaec322.pcaac364             | -0.045246905 | 0.064967204 | 0.48732224  |
| smc181.methioninesulfoxide    | 0.008279004  | 0.011891361 | 0.48747053  |
| smc202.valine                 | -0.054040148 | 0.077637594 | 0.487572645 |
| smc161.pcaac320               | -0.03783541  | 0.054362219 | 0.487615861 |
| pcaec365.smc161               | -0.047185811 | 0.067798741 | 0.487627339 |
| pcaec402.pcaac384             | 0.033559669  | 0.048222549 | 0.487649643 |
| pcaac421.taurine              | -0.051046867 | 0.073354172 | 0.487672881 |
| pcaec424.pcaec423             | 0.038324968  | 0.055076661 | 0.487702965 |
| pcaec384.pcaec425             | -0.005735651 | 0.008242809 | 0.487709632 |
| pcaac380.alanine              | -0.012158209 | 0.017477904 | 0.487836945 |
| alanine.pcaec446              | 0.041518802  | 0.059684946 | 0.487837187 |
| c10.acetylmithoine            | -0.021554136 | 0.03098793  | 0.487879151 |
| pcaec421.pcaac425             | -0.140765956 | 0.20241777  | 0.487968216 |
| pcaac402.pcaec385             | 0.067728572  | 0.097408707 | 0.488043074 |
| pcaec384.lysopcac280          | 0.006997472  | 0.010064453 | 0.488066222 |
| smc202.putrescine             | -0.031989696 | 0.046011    | 0.488068771 |
| smc160.pcaac383               | 0.002278101  | 0.003276823 | 0.488097193 |
| c142.pcaac421                 | 0.016370625  | 0.023550233 | 0.488147163 |
| pcaac406.serotonin            | -0.078422161 | 0.11281648  | 0.488150939 |
| c181.pcaac320                 | -0.041771579 | 0.060106106 | 0.48825488  |
| pcaec403.serine               | 0.076670053  | 0.110330274 | 0.488286102 |
| putrescine.pcaac363           | 0.006547946  | 0.009426849 | 0.488478523 |
| pcaac383.pcaac364             | -0.044096655 | 0.063487231 | 0.488497811 |
| pcaac363.c8                   | -0.028276266 | 0.040712838 | 0.488526365 |
| pcaec420.pcaec386             | 0.010209678  | 0.014700405 | 0.488534302 |
| pcaac422.pcaec443             | -0.061535816 | 0.088605065 | 0.488547623 |
| pcaac425.c51                  | 0.041414545  | 0.059632669 | 0.488548384 |
| serotonin.pcaec364            | 0.02271166   | 0.032709422 | 0.48864096  |
| asymmetricdimethylarginine.c2 | 0.047062228  | 0.067784231 | 0.488673136 |
| smohc141.c102                 | 0.028133599  | 0.040523283 | 0.488696256 |
| pcaac320.serine               | -0.02073981  | 0.029882683 | 0.488831628 |
| c18.pcaec382                  | -0.006232969 | 0.00898238  | 0.488913197 |

|                              |              |             |             |
|------------------------------|--------------|-------------|-------------|
| pcaac360.pcaac421            | -0.018916317 | 0.027262982 | 0.488953455 |
| pcaec364.c0                  | 0.000368324  | 0.000530872 | 0.488976188 |
| glutamicacid.pcaac323        | -0.078170388 | 0.112669268 | 0.488979849 |
| pcaec301.pcaac380            | 0.045356358  | 0.065394444 | 0.489119148 |
| pcaec424.pcaac344            | 0.051723442  | 0.074574574 | 0.48911983  |
| c142.pcaec383                | 0.045854776  | 0.066113367 | 0.489121171 |
| pcaec420.spermidine          | -0.047541983 | 0.068548535 | 0.489137334 |
| lysopcac180.pcaec383         | 0.091251308  | 0.131593055 | 0.489210217 |
| c181.pcaac364                | -0.030615378 | 0.044161119 | 0.489316629 |
| pcaec446.smohc141            | -0.024050338 | 0.034693402 | 0.489341847 |
| pcaac362.lysopcac180         | 0.048461074  | 0.069912881 | 0.489380251 |
| pcaac321.smc160              | 0.049637643  | 0.071612262 | 0.489392302 |
| lysopcac204.pcaec402         | -0.022265958 | 0.032124718 | 0.489413963 |
| pcaec420.serine              | -0.03869419  | 0.055829167 | 0.48943138  |
| smohc161.pcaec380            | -0.028441569 | 0.041037205 | 0.489440216 |
| pcaec343.pcaac384            | 0.065046904  | 0.093858748 | 0.489464068 |
| pcaec362.pcaac381            | 0.026299389  | 0.037952782 | 0.489513799 |
| pcaec365.c182                | -0.023763716 | 0.034298999 | 0.489582822 |
| c162.pcaac384                | 0.03310739   | 0.047787348 | 0.489603672 |
| smohc241.pcaec383            | -0.041679433 | 0.060168156 | 0.489660471 |
| pcaec405.glycine             | 0.025755586  | 0.037185238 | 0.489714607 |
| pcaec364.lysopcac181         | 0.023802128  | 0.034370144 | 0.489780902 |
| pcaec321.c182                | -0.039887672 | 0.05761333  | 0.489899359 |
| pcaac420.pcaec360            | -0.003984372 | 0.005755341 | 0.489926149 |
| lysopcac281.h1               | 0.001424157  | 0.002057181 | 0.489929615 |
| pcaec385.glutamicacid        | 0.027909205  | 0.040323288 | 0.490023258 |
| pcaec383.pcaec342            | 0.067501995  | 0.097530397 | 0.490038129 |
| prolinr.smc261               | 0.023121351  | 0.033414814 | 0.49014033  |
| c8.pcaac404                  | 0.003514903  | 0.005079963 | 0.490161611 |
| pcaec300.pcaec445            | 0.053510598  | 0.077337166 | 0.490162881 |
| lysopcac204.pcaac425         | -0.053571759 | 0.077426168 | 0.49016628  |
| pcaac420.pcaec403            | 0.017414243  | 0.025168512 | 0.490167349 |
| pcaac366.pcaac365            | -0.051139795 | 0.073912328 | 0.490172303 |
| methioninesulfoxide.pcaac404 | -0.006583121 | 0.009515763 | 0.490226031 |
| lysopcac161.leucine          | 0.014817062  | 0.021418548 | 0.490242145 |
| pcaec405.creatinine          | -0.008848742 | 0.012795616 | 0.490393479 |
| smohc221.smc260              | 0.030203274  | 0.043680875 | 0.490450945 |
| pcaac381.valine              | -0.021842489 | 0.031604553 | 0.490660512 |
| asparticacid.smohc141        | -0.029128574 | 0.042148477 | 0.490675614 |
| lysopcac180.c162             | 0.059496566  | 0.086106964 | 0.490759055 |
| pcaec363.lysopcac170         | -0.005781612 | 0.008367899 | 0.490780087 |
| kynurenine.smohc222          | 0.004765976  | 0.006898108 | 0.490790663 |
| pcaec425.smc181              | -0.010447741 | 0.015122045 | 0.490800683 |

|                            |              |             |             |
|----------------------------|--------------|-------------|-------------|
| c141.methioninesulfoxide   | 0.011419972  | 0.01652985  | 0.490816352 |
| c18.smc260                 | 0.018806735  | 0.027224701 | 0.490862044 |
| smc261.h1                  | 0.001923068  | 0.002783869 | 0.49086649  |
| c2.pcaec420                | -0.016567888 | 0.023985082 | 0.490886305 |
| pcaac420.isoleucine        | 0.012595042  | 0.01823416  | 0.490898349 |
| pcaac320.methionine        | -0.025813207 | 0.037371822 | 0.49091446  |
| c3.pcaac404                | -0.00564478  | 0.008172546 | 0.490922476 |
| putrescine.c12             | -0.032576385 | 0.047169308 | 0.490968577 |
| pcaec382.pcaac361          | 0.047859316  | 0.069300237 | 0.490980156 |
| pcaac385.smc181            | -0.041904572 | 0.060682209 | 0.491011779 |
| lysopcac181.alanine        | -0.018982831 | 0.027490936 | 0.491040252 |
| pcaac363.smohc241          | 0.046953534  | 0.068017942 | 0.491166437 |
| glutamine.lysopcac203      | -0.005283232 | 0.007653826 | 0.491190072 |
| pcaac321.pcaac323          | 0.027264072  | 0.03949941  | 0.491210945 |
| methionine.c8              | -0.033855226 | 0.049051763 | 0.49123986  |
| smohc222.pcaac404          | -0.005448561 | 0.007895138 | 0.491288641 |
| c3.c0                      | -0.000671889 | 0.000973607 | 0.491297003 |
| lysopcac161.putrescine     | -0.061779622 | 0.08952579  | 0.49131358  |
| pcaec386.serotonin         | -0.080075184 | 0.11603868  | 0.491315489 |
| pcaec362.ornithine         | 0.018675825  | 0.027064837 | 0.491336188 |
| pcaec362.lysopcac160       | 0.018057108  | 0.026172874 | 0.491413494 |
| pcaec382.c14               | 0.062812989  | 0.09104661  | 0.491424541 |
| pcaac386.pcaac240          | -0.013727776 | 0.019898515 | 0.491430675 |
| lysopcac280.pcaec321       | 0.017118424  | 0.024813606 | 0.491436279 |
| pcaec423.pcaec360          | 0.003069885  | 0.004450081 | 0.49145591  |
| pcaec385.pcaec365          | 0.040371926  | 0.05852595  | 0.49147899  |
| pcaac344.ornithine         | 0.017947091  | 0.026033266 | 0.491743439 |
| serine.pcaec420            | 0.030574175  | 0.044351703 | 0.491764304 |
| pcaac424.pcaac406          | -0.052381125 | 0.076001192 | 0.491853924 |
| smohc161.c51dc             | -0.088086884 | 0.127841406 | 0.4919681   |
| lysopcac180.leucine        | 0.003531937  | 0.005126628 | 0.492026441 |
| pcaec382.pcaac240          | -0.019503302 | 0.028310772 | 0.492050962 |
| lysopcac203.acetylnithoine | 0.035014361  | 0.050837229 | 0.492142627 |
| lysine.pcaac402            | -0.0639848   | 0.092938273 | 0.492323812 |
| arginine.c16               | -0.022712275 | 0.032996928 | 0.492418395 |
| lysopcac180.pcaac300       | -0.029764482 | 0.043244237 | 0.492435362 |
| pcaac366.lysopcac182       | -0.012372292 | 0.017977113 | 0.492475019 |
| pcaac402.pcaec386          | 0.00936296   | 0.013604937 | 0.492488524 |
| pcaec360.pcaac344          | 0.036941165  | 0.053681645 | 0.492520221 |
| c181.creatinine            | 0.007758098  | 0.011274349 | 0.492541105 |
| pcaec343.lysopcac203       | 0.021302262  | 0.030957404 | 0.492543681 |
| pcaec446.pcaec444          | 0.10092546   | 0.146736405 | 0.492740899 |
| creatinine.pcaec443        | -0.043719533 | 0.063574339 | 0.492809704 |

|                             |              |             |             |
|-----------------------------|--------------|-------------|-------------|
| isoleucine.pcaac365         | -0.026081106 | 0.037927599 | 0.492832568 |
| c141oh.smc180               | 0.008050641  | 0.011710518 | 0.492948231 |
| smohc222.lysopcac203        | -0.011357312 | 0.01652329  | 0.49302306  |
| pcaac240.c10                | -0.003669872 | 0.005339395 | 0.493043071 |
| c51.pcaec322                | 0.038237836  | 0.055649153 | 0.493166471 |
| pcaec405.h1                 | 0.002140943  | 0.003116175 | 0.493217502 |
| c10.lysopcac182             | -0.073129191 | 0.106444436 | 0.493233001 |
| h1.pcaec321                 | 0.012557885  | 0.018279018 | 0.493237115 |
| pcaac421.pcaac404           | -0.005545606 | 0.008073966 | 0.493338049 |
| glutamine.pcaec404          | -0.021116612 | 0.030746024 | 0.493364684 |
| smohc221.c102               | 0.023163976  | 0.033727176 | 0.493366826 |
| smc240.c51                  | 0.042437374  | 0.061792635 | 0.49338803  |
| creatinine.pcaec343         | 0.056254541  | 0.081912993 | 0.493394977 |
| c10.pcaac300                | 0.037892114  | 0.055182206 | 0.493449633 |
| glutamine.pcaac300          | -0.062925574 | 0.091663791 | 0.49356924  |
| glutamine.pcaec425          | -0.00506287  | 0.007375638 | 0.493601163 |
| pcaac364.c16                | 0.018369329  | 0.026762747 | 0.493635558 |
| c2.ornithine                | -0.064001591 | 0.093255868 | 0.493683237 |
| arginine.h1                 | -0.001665053 | 0.002426667 | 0.493779219 |
| c5.smohc241                 | 0.064629192  | 0.094195967 | 0.493800607 |
| c182.pcaac404               | 0.002662647  | 0.003881112 | 0.493839264 |
| c141oh.pcaac385             | 0.00605445   | 0.008827312 | 0.49394977  |
| smohc161.smc180             | 0.024380512  | 0.035548644 | 0.493975999 |
| c3.serotonin                | 0.08054947   | 0.117467896 | 0.494051728 |
| pcaac401.histidine          | -0.069347197 | 0.101136916 | 0.494075842 |
| pcaac385.alanine            | -0.014863559 | 0.02167732  | 0.494077801 |
| pcaec384.lysopcac180        | -0.046988417 | 0.068528877 | 0.494077839 |
| pcaec386.pcaac421           | -0.024521557 | 0.035766835 | 0.49412713  |
| pcaac384.c181               | -0.006555933 | 0.00956302  | 0.49415501  |
| pcaec424.smohc141           | -0.018250225 | 0.026625605 | 0.494225195 |
| pcaac341.pcaec342           | 0.089140271  | 0.130055325 | 0.494247955 |
| pcaec360.pcaec364           | 0.043828051  | 0.063946088 | 0.49425553  |
| pcaec403.pcaec321           | 0.007503066  | 0.010954491 | 0.494544928 |
| lysopcac281.pcaac383        | -0.002854032 | 0.004167556 | 0.494613544 |
| pcaac343.pcaec362           | -0.030519357 | 0.04457136  | 0.49467097  |
| smc260.kynurenine           | -0.002935443 | 0.004287087 | 0.494679003 |
| c5.serine                   | 0.02714972   | 0.039652488 | 0.49469535  |
| pcaec341.ornithine          | 0.031408321  | 0.045873712 | 0.494709308 |
| acetylmethionine.isoleucine | -0.01369223  | 0.01999942  | 0.494733169 |
| pcaec386.smc240             | -0.032100639 | 0.046888687 | 0.494744258 |
| pcaec425.pcaac424           | 0.009575617  | 0.013987517 | 0.494763555 |
| isoleucine.lysopcac181      | -0.043424663 | 0.063437871 | 0.494801532 |
| smc161.pcaac386             | 0.010008476  | 0.014621557 | 0.49481496  |



|                                |              |             |             |
|--------------------------------|--------------|-------------|-------------|
| c162.h1                        | 0.002318001  | 0.003387215 | 0.494917653 |
| lysine.pcaec386                | 0.009466068  | 0.013833793 | 0.494959741 |
| lysopcac281.c51dc              | 0.089286494  | 0.130506594 | 0.495034125 |
| pcaac422.pcaac300              | -0.055767972 | 0.081514208 | 0.495035891 |
| leucine.pcaac406               | 0.028784169  | 0.042076059 | 0.495068501 |
| smc181.leucine                 | -0.007530126 | 0.011007795 | 0.495085089 |
| smc180.pcaac422                | -0.017387129 | 0.025421028 | 0.495151662 |
| c141oh.citruline               | -0.027260609 | 0.039859203 | 0.495179241 |
| smc160.smc180                  | -0.013168844 | 0.019255557 | 0.49519449  |
| smc241.pcaac421                | -0.010399914 | 0.01520834  | 0.495237749 |
| pcaac404.pcaac240              | -0.01568403  | 0.022937663 | 0.495276831 |
| c181.c141oh                    | -0.116522573 | 0.170435877 | 0.495335763 |
| pcaec443.kynurenine            | 0.01131235   | 0.016547416 | 0.495361944 |
| smc241.c141                    | 0.022592716  | 0.033048449 | 0.495367165 |
| lysopcac161.pcaec421           | 0.001746291  | 0.002554555 | 0.495383089 |
| smohc221.pcaac422              | -0.017411427 | 0.025470849 | 0.495393363 |
| pcaec425.asymmetricdimethylar; | 0.016006103  | 0.023416016 | 0.495411545 |
| pcaac381.pcaec384              | -0.032456718 | 0.047491521 | 0.495494856 |
| pcaac401.pcaac240              | -0.016467338 | 0.024097162 | 0.495525593 |
| asparticacid.pcaac403          | -0.023078448 | 0.033772481 | 0.495539332 |
| kynurenine.pcaac406            | 0.041305704  | 0.060455546 | 0.495608452 |
| creatinine.c142                | -0.038775363 | 0.056764722 | 0.495704095 |
| pcaec361.pcaec421              | 0.002100291  | 0.003074874 | 0.495729005 |
| pcaac363.pcaac383              | -0.00648541  | 0.009495155 | 0.495745678 |
| pcaec322.pcaac344              | 0.068478942  | 0.100259162 | 0.495748057 |
| pcaac426.pcaac321              | 0.043635312  | 0.063890386 | 0.495778178 |
| histidine.smc180               | -0.024126105 | 0.035326028 | 0.495788253 |
| methionine.smc261              | 0.023382648  | 0.034238543 | 0.495802094 |
| c181.pcaec424                  | 0.028939351  | 0.042379497 | 0.4958471   |
| pcaac401.pcaac384              | 0.031136431  | 0.045597798 | 0.495855058 |
| smohc241.pcaec425              | -0.003690048 | 0.005404487 | 0.495902011 |
| putrescine.pcaec420            | -0.025195426 | 0.036905716 | 0.495951032 |
| c101.pcaec380                  | -0.054149265 | 0.079322534 | 0.495982801 |
| pcaec385.c18                   | -0.023527682 | 0.03446841  | 0.496020518 |
| pcaac320.pcaac406              | -0.034250619 | 0.05017955  | 0.496036595 |
| pcaec321.pcaac385              | -0.023956088 | 0.035099295 | 0.49606053  |
| smc181.histidine               | -0.045733644 | 0.067026183 | 0.496185467 |
| pcaac421.c141oh                | 0.069756838  | 0.102297239 | 0.496451224 |
| c5.smohc161                    | -0.01191582  | 0.017476069 | 0.496493484 |
| acetylmithoine.pcaec322        | -0.07273038  | 0.106694912 | 0.4966004   |
| smc161.pcaec445                | -0.02940638  | 0.043143128 | 0.496642174 |
| pcaac361.c102                  | 0.022913282  | 0.033617673 | 0.496652339 |
| pcaec445.lysine                | 0.073599488  | 0.107984723 | 0.496659454 |

|                               |              |             |             |
|-------------------------------|--------------|-------------|-------------|
| pcaec424.pcaec425             | 0.010832251  | 0.015896033 | 0.496741092 |
| pcaec421.lysopcac280          | -0.010405641 | 0.015270534 | 0.49675627  |
| pcaec424.smc181               | -0.005806955 | 0.008522816 | 0.496805029 |
| pcaac320.valine               | -0.028802019 | 0.042274901 | 0.496829775 |
| lysopcac140.pcaac341          | -0.004266115 | 0.006261711 | 0.496830579 |
| lysopcac180.ornithine         | 0.026943409  | 0.039548326 | 0.496845504 |
| pcaac344.pcaec446             | -0.042207941 | 0.06195965  | 0.49688431  |
| c102.pcaac386                 | 0.011330332  | 0.016632889 | 0.496894441 |
| smc261.lysopcac280            | 0.007652516  | 0.01123646  | 0.496993583 |
| alphaaminoadipicacid.pcaac365 | -0.021754812 | 0.031955691 | 0.497159368 |
| pcaec403.c142                 | 0.028846     | 0.042376998 | 0.497210504 |
| smc241.smohc241               | 0.055361768  | 0.081332846 | 0.497221804 |
| pcaec385.lysopcac203          | -0.009671858 | 0.014209245 | 0.497226855 |
| pcaac342.smc261               | 0.022343104  | 0.032828071 | 0.497267137 |
| pcaac343.pcaec386             | 0.0070235    | 0.010322197 | 0.497382538 |
| lysopcac182.pcaac361          | 0.035418397  | 0.05205423  | 0.497390993 |
| pcaac403.lysopcac203          | 0.01505592   | 0.022128083 | 0.497400239 |
| pcaac360.c141oh               | -0.076296028 | 0.112152057 | 0.497468285 |
| pcaec444.pcaec363             | 0.030592049  | 0.044970196 | 0.497479052 |
| pcaec420.tyrosine             | -0.053865929 | 0.079185738 | 0.497495471 |
| pcaec423.c4                   | -0.012434246 | 0.018279738 | 0.497512959 |
| pcaec421.smohc141             | -0.013844334 | 0.020355098 | 0.497562982 |
| smc260.c18                    | 0.02524802   | 0.037121956 | 0.497565371 |
| pcaac364.asparticacid         | -0.04813625  | 0.070776983 | 0.497581445 |
| c141.pcaac424                 | 0.007249414  | 0.010659311 | 0.497587846 |
| pcaac281.smc260               | 0.021462316  | 0.031570826 | 0.497768799 |
| pcaac343.lysine               | -0.055907177 | 0.082244171 | 0.497796667 |
| c5.lysopcac160                | 0.010559213  | 0.015537021 | 0.497894128 |
| pcaec385.leucine              | -0.004267142 | 0.006279737 | 0.497961501 |
| c3.smc180                     | 0.011642382  | 0.017135496 | 0.498011338 |
| asparticacid.lysine           | -0.060982677 | 0.089768174 | 0.498071661 |
| creatinine.pcaec422           | 0.023955621  | 0.035263588 | 0.498074793 |
| lysopcac160.h1                | -0.001401229 | 0.002063409 | 0.49822985  |
| pcaac323.pcaec343             | -0.065380693 | 0.096278391 | 0.498233054 |
| pcaec381.smc260               | 0.026954403  | 0.039704183 | 0.498358709 |
| c12.glycine                   | -0.020631091 | 0.030396473 | 0.498451975 |
| ornithine.prolinr             | 0.028466569  | 0.041941571 | 0.498460433 |
| pcaac364.methionine           | -0.01721894  | 0.025373691 | 0.498527239 |
| pcaac360.pcaac240             | -0.013055574 | 0.019240304 | 0.49856545  |
| c12.pcaec401                  | -0.017892081 | 0.026369541 | 0.498590902 |
| pcaac344.c3                   | 0.032382891  | 0.047728333 | 0.498609576 |
| methionine.pcaec380           | 0.033601207  | 0.049525739 | 0.498624828 |
| pcaec365.alanine              | -0.017681553 | 0.026062327 | 0.498641295 |

|                               |              |             |             |
|-------------------------------|--------------|-------------|-------------|
| c4.valine                     | 0.06257462   | 0.092235299 | 0.498647379 |
| pcaac341.lysopcac160          | -0.015863123 | 0.023382471 | 0.498650101 |
| pcaec425.putrescine           | -0.038946645 | 0.057410789 | 0.49867159  |
| pcaac383.pcaac380             | 0.032917143  | 0.048554129 | 0.498948483 |
| lysopcac204.pcaec343          | -0.056328712 | 0.083089783 | 0.498962065 |
| smc261.pcaec420               | 0.02042617   | 0.030132603 | 0.498993539 |
| lysine.glutamine              | 0.01787632   | 0.026374272 | 0.499045489 |
| lysopcac280.c142              | -0.032903757 | 0.048548411 | 0.499072311 |
| asparticacid.pcaec341         | -0.025531091 | 0.037671672 | 0.499088076 |
| pcaac365.pcaec321             | -0.031333901 | 0.046233909 | 0.4990887   |
| smc180.pcaac240               | -0.008113744 | 0.011973419 | 0.499138735 |
| pcaac401.smc160               | -0.050747365 | 0.074894613 | 0.499178406 |
| pcaac403.methionine           | -0.035676273 | 0.0526533   | 0.499187317 |
| pcaac420.c141oh               | 0.083055764  | 0.122586958 | 0.499215299 |
| pcaac402.arginine             | -0.058989027 | 0.087070666 | 0.499241089 |
| acetylmethionine.histidine    | -0.056777816 | 0.083821572 | 0.499316527 |
| pcaec423.pcaac425             | 0.081105668  | 0.119758283 | 0.499392703 |
| pcaec406.smc160               | -0.045414288 | 0.067057844 | 0.499395387 |
| pcaec321.histidine            | -0.03923243  | 0.057943367 | 0.499495416 |
| c181.pcaac323                 | -0.055219423 | 0.081598913 | 0.499726112 |
| pcaec425.pcaec360             | -0.003407377 | 0.005036232 | 0.499817803 |
| pcaac386.c142                 | 0.023383688  | 0.034562008 | 0.499818226 |
| pcaec446.pcaac361             | 0.045796979  | 0.067695404 | 0.499854088 |
| pcaec404.pcaac323             | -0.050860348 | 0.075184607 | 0.49988095  |
| alphaaminoadipicacid.pcaec422 | 0.022204263  | 0.032835048 | 0.500030446 |
| pcaac344.putrescine           | -0.04310996  | 0.063758601 | 0.500089421 |
| pcaec383.lysopcac182          | 0.032402743  | 0.047937701 | 0.500221714 |
| lysopcac160.pcaac383          | -0.006376093 | 0.009436318 | 0.500371939 |
| pcaac380.smohe241             | 0.065549147  | 0.09702547  | 0.500441645 |
| pcaec402.smc260               | 0.029192709  | 0.043214831 | 0.500480751 |
| citruline.pcaac425            | 0.050509143  | 0.074779078 | 0.500531651 |
| c141oh.pcaac386               | 0.019563432  | 0.028963826 | 0.50053241  |
| pcaac384.pcaec423             | -0.00652261  | 0.009657678 | 0.50057226  |
| histidine.pcaac320            | -0.019282619 | 0.028550919 | 0.500574933 |
| c10.arginine                  | 0.01123292   | 0.016632116 | 0.500575675 |
| creatinine.pcaac384           | 0.046148364  | 0.068337569 | 0.500623339 |
| c12.glutamicacid              | -0.033781882 | 0.050040276 | 0.500753931 |
| smc181.c142                   | 0.049815199  | 0.073790849 | 0.500758635 |
| pcaac240.transhydroxyproline  | 0.047524223  | 0.070408565 | 0.500827384 |
| lysopcac181.pcaec386          | 0.017684976  | 0.026202819 | 0.50085994  |
| pcaac406.c8                   | -0.037677176 | 0.055832302 | 0.500922591 |
| pcaac380.pcaac421             | -0.020315943 | 0.030107865 | 0.500957804 |
| pcaac406.alanine              | -0.02444897  | 0.036234948 | 0.500981533 |

|                              |              |             |             |
|------------------------------|--------------|-------------|-------------|
| smc240.pcaac364              | 0.038510288  | 0.057093365 | 0.501121068 |
| lysopcac204.pcaac300         | -0.035911665 | 0.053250898 | 0.501202269 |
| phenylalanine.pcaec383       | -0.039237223 | 0.058190429 | 0.501263171 |
| pcaec425.pcaec322            | 0.043305286  | 0.064235564 | 0.501343182 |
| lysine.c0                    | -0.000445115 | 0.000660424 | 0.501457739 |
| smc180.pcaac363              | -0.004462064 | 0.006620927 | 0.501489067 |
| smohc222.transhydroxyproline | 0.026507923  | 0.039335345 | 0.501512997 |
| smohc241.c0                  | 0.000311851  | 0.000462845 | 0.501592703 |
| methioninesulfoxide.c5       | -0.01742739  | 0.025865887 | 0.501599291 |
| pcaec340.c162                | -0.057369573 | 0.085160582 | 0.501660254 |
| pcaec365.c0                  | 0.000304633  | 0.000452214 | 0.50167059  |
| methioninesulfoxide.c102     | 0.041742631  | 0.061988364 | 0.501830695 |
| lysopcac281.pcaec321         | 0.016875093  | 0.025064025 | 0.501903732 |
| pcaec321.c0                  | 0.000250643  | 0.000372286 | 0.501920788 |
| h1.lysopcac280               | 0.004321634  | 0.006420012 | 0.501985587 |
| pcaec385.pcaac363            | -0.007106815 | 0.010558969 | 0.50204318  |
| creatinine.c102              | -0.034121908 | 0.05069834  | 0.502056853 |
| c12.pcaac361                 | -0.024623912 | 0.036587287 | 0.502069365 |
| pcaac381.leucine             | 0.02182687   | 0.032435147 | 0.502119734 |
| lysopcac140.pcaac404         | -0.006100709 | 0.009066438 | 0.502151217 |
| acetylornithoine.c182        | 0.064048837  | 0.095212697 | 0.50227619  |
| c18.pcaac386                 | -0.013284964 | 0.019749196 | 0.502281507 |
| pcaac406.c142                | -0.035718206 | 0.053108423 | 0.502364758 |
| pcaac405.isoleucine          | 0.019360186  | 0.028786519 | 0.502370517 |
| smohc222.putrescine          | -0.027123884 | 0.040334126 | 0.502410937 |
| pcaec360.pcaec301            | 0.043661624  | 0.06493755  | 0.502484855 |
| c102.pcaac240                | -0.008644242 | 0.012856663 | 0.50249007  |
| c182.serotonin               | -0.055110398 | 0.081970952 | 0.502514732 |
| pcaac381.c51                 | 0.033634956  | 0.050029131 | 0.502520297 |
| pcaec321.pcaac322            | -0.049048833 | 0.072958752 | 0.502536629 |
| pcaec341.leucine             | -0.004383807 | 0.006521627 | 0.502591443 |
| pcaec343.pcaec380            | -0.020784621 | 0.030921773 | 0.502608876 |
| lysopcac281.smc240           | -0.033437666 | 0.049754462 | 0.502681357 |
| smohc161.pcaac385            | -0.015639226 | 0.023273119 | 0.502723833 |
| alanine.pcaec386             | 0.008377055  | 0.012466763 | 0.502746413 |
| pcaac360.c141                | -0.038329417 | 0.057046254 | 0.502778413 |
| pcaec363.kynurenine          | -0.005020029 | 0.007471867 | 0.502805871 |
| c162.lysopcac160             | 0.010547788  | 0.015699583 | 0.502809626 |
| smc161.spermidine            | 0.046929704  | 0.069858549 | 0.50285385  |
| smc180.pcaec425              | -0.00529503  | 0.007886223 | 0.503078573 |
| c8.pcaac341                  | 0.006581141  | 0.009802027 | 0.503092362 |
| pcaac362.c18                 | -0.027786953 | 0.04139082  | 0.503139868 |
| c141.pcaec322                | 0.038312347  | 0.057070805 | 0.503151774 |

|                            |              |             |             |
|----------------------------|--------------|-------------|-------------|
| pcaec383.pcaac363          | -0.018705059 | 0.027863541 | 0.503153734 |
| pcaac402.lysopcac203       | 0.017404567  | 0.02592773  | 0.503177326 |
| putrescine.smohc161        | 0.007394402  | 0.011015687 | 0.503184478 |
| pcaac381.pcaac364          | -0.040634326 | 0.060542998 | 0.503245617 |
| lysopcac170.pcaac404       | -0.002262568 | 0.00337114  | 0.503249852 |
| glutamine.glutamicacid     | 0.051744933  | 0.077098063 | 0.503250306 |
| methionine.pcaec365        | -0.014191441 | 0.021145078 | 0.503257327 |
| c2.pcaec386                | 0.004194452  | 0.006249798 | 0.503265097 |
| c51dc.serotonin            | 0.067165199  | 0.10009231  | 0.503329564 |
| pcaec406.c162              | -0.045812684 | 0.068278138 | 0.50336835  |
| smohc241.lysopcac180       | 0.03768448   | 0.056171882 | 0.503427723 |
| smc180.transhydroxyproline | 0.017381199  | 0.025909989 | 0.503458182 |
| pcaac343.c102              | 0.031885359  | 0.047539196 | 0.503529831 |
| pcaac320.pcaec361          | -0.007632762 | 0.011381058 | 0.503569479 |
| c10.pcaac385               | 0.014242892  | 0.021237369 | 0.503571013 |
| c10.taurine                | -0.035097077 | 0.052334905 | 0.503588654 |
| c102.lysopcac161           | 0.037937276  | 0.056573475 | 0.503614368 |
| pcaec382.c101              | 0.017710051  | 0.02641583  | 0.503710223 |
| pcaac426.c5                | 0.009262072  | 0.013815271 | 0.503716915 |
| c162.pcaec424              | -0.009594246 | 0.014313166 | 0.503789107 |
| pcaac381.acetylorlithoine  | -0.027148733 | 0.040502749 | 0.503798976 |
| pcaec322.h1                | 0.001105325  | 0.001649062 | 0.503810556 |
| citruline.pcaac420         | 0.043588343  | 0.065041964 | 0.503885612 |
| c101.smc261                | 0.028815367  | 0.04300494  | 0.503955134 |
| c0.c162                    | 0.075455535  | 0.112623836 | 0.503999277 |
| smohc222.pcaec380          | -0.037950071 | 0.056649387 | 0.504041827 |
| pcaec405.pcaec343          | 0.057560084  | 0.085924435 | 0.504054228 |
| pcaec380.pcaec382          | 0.02278974   | 0.034041268 | 0.504319933 |
| smohc221.glutamine         | -0.015195066 | 0.022700383 | 0.504382874 |
| pcaec380.lysine            | 0.074035718  | 0.110607384 | 0.504394877 |
| pcaec381.pcaac361          | 0.034446205  | 0.051483865 | 0.504578037 |
| c142.pcaec322              | 0.040049157  | 0.059861427 | 0.50460147  |
| pcaec425.c16               | 0.023938912  | 0.035786613 | 0.504662708 |
| lysopcac140.pcaac300       | -0.041107483 | 0.061455608 | 0.504686634 |
| glutamicacid.pcaac420      | 0.050980521  | 0.07622033  | 0.504712026 |
| smc181.pcaec384            | -0.032062613 | 0.047938276 | 0.50472863  |
| smc261.c51dc               | -0.091451134 | 0.136748936 | 0.504778933 |
| pcaac365.c51dc             | 0.100171604  | 0.149811616 | 0.504843571 |
| pcaec404.phenylalanine     | 0.044437104  | 0.066458961 | 0.504850363 |
| pcaec420.smc180            | -0.007200162 | 0.010771737 | 0.504983215 |
| pcaec340.smc160            | 0.067859755  | 0.101525431 | 0.505001908 |
| pcaac404.pcaec423          | -0.008791445 | 0.013152971 | 0.505002919 |
| pcaac240.pcaac341          | 0.006925878  | 0.010362781 | 0.505040044 |

|                              |              |             |             |
|------------------------------|--------------|-------------|-------------|
| pcaec343.pcaec421            | 0.001835725  | 0.002746844 | 0.505064324 |
| pcaec444.lysopcac204         | -0.011718279 | 0.017535271 | 0.505086204 |
| pcaac402.valine              | -0.019209206 | 0.028756934 | 0.505266826 |
| smc180.ornithine             | 0.030735378  | 0.046019534 | 0.505335821 |
| c4.lysopcac161               | -0.056808445 | 0.085058358 | 0.505336242 |
| pcaac422.isoleucine          | 0.017939572  | 0.026860699 | 0.505337363 |
| lysopcac170.pcaac322         | -0.049050166 | 0.073478595 | 0.505547882 |
| pcaac362.pcaec341            | 0.04702937   | 0.070459726 | 0.505598193 |
| pcaec342.pcaec363            | 0.089582313  | 0.134217054 | 0.50561154  |
| c5.pcaac420                  | 0.070907637  | 0.106260385 | 0.505702462 |
| pcaac240.h1                  | 0.002109043  | 0.003161022 | 0.505764898 |
| pcaec383.c181                | -0.028824558 | 0.043207071 | 0.505813769 |
| pcaec401.h1                  | 0.000913506  | 0.001369459 | 0.505858211 |
| smohc141.pcaec341            | 0.08616283   | 0.129185891 | 0.505914476 |
| acetylornithoine.c141        | 0.026920011  | 0.040362698 | 0.505924087 |
| pcaec385.pcaec403            | 0.02916239   | 0.043725337 | 0.505929067 |
| phenylalanine.pcaac240       | -0.009705409 | 0.014552723 | 0.505948975 |
| pcaac401.pcaac421            | -0.058849651 | 0.088260871 | 0.506040806 |
| arginine.glycine             | 0.025971764  | 0.038953804 | 0.50606438  |
| pcaac405.pcaac363            | -0.010213326 | 0.015320282 | 0.50611436  |
| pcaac343.pcaec343            | 0.086825922  | 0.13024461  | 0.50612493  |
| c51dc.c10                    | -0.005101297 | 0.007652939 | 0.506161339 |
| c162.transhydroxyproline     | 0.017658707  | 0.026492312 | 0.506174406 |
| pcaec340.pcaac406            | -0.040088039 | 0.060145114 | 0.506198436 |
| glutamicacid.serotonin       | 0.090804573  | 0.136255947 | 0.506259243 |
| prolinr.asparticacid         | 0.024568704  | 0.036879722 | 0.506413324 |
| pcaec402.pcaec445            | -0.029008883 | 0.043547178 | 0.506436414 |
| smc180.pcaec443              | -0.048966496 | 0.073524569 | 0.506538483 |
| pcaec446.c101                | -0.019091965 | 0.028668512 | 0.506559061 |
| pcaec365.pcaac323            | 0.085921846  | 0.129042257 | 0.506631206 |
| pcaec362.arginine            | -0.022773097 | 0.034202145 | 0.506634042 |
| pcaac320.c0                  | 0.00026092   | 0.000391873 | 0.506640069 |
| c141oh.c102                  | 0.040188487  | 0.060364884 | 0.506684317 |
| pcaac341.pcaec405            | 0.04988994   | 0.074942339 | 0.506715143 |
| pcaec363.smc160              | 0.088650329  | 0.1331785   | 0.50675373  |
| pcaac381.pcaac421            | -0.018951982 | 0.02847185  | 0.506760841 |
| pcaac404.pcaac281            | 0.002862819  | 0.00430146  | 0.50682035  |
| pcaac363.pcaac426            | -0.047458319 | 0.071307515 | 0.506821317 |
| methioninesulfoxide.pcaac384 | 0.041060715  | 0.061705004 | 0.50689059  |
| pcaec340.pcaec422            | -0.027374585 | 0.041141773 | 0.506931201 |
| smc160.h1                    | 0.001363381  | 0.002049057 | 0.506932656 |
| pcaec401.c51                 | 0.091784612  | 0.137972026 | 0.50701491  |
| smc241.pcaac385              | -0.011098879 | 0.016686396 | 0.507075734 |

|                            |              |             |             |
|----------------------------|--------------|-------------|-------------|
| alanine.smc160             | 0.053884641  | 0.081012035 | 0.507076801 |
| pcaac403.kynurenine        | -0.009813045 | 0.014758705 | 0.507232937 |
| pcaac320.pcaac364          | -0.057839975 | 0.086998078 | 0.507269156 |
| smc240.tyrosine            | -0.045098654 | 0.06783401  | 0.507271456 |
| pcaac344.c16               | 0.019205736  | 0.028893227 | 0.507350686 |
| c181.glutamine             | 0.01605227   | 0.024150246 | 0.507370225 |
| lysopcac170.kynurenine     | -0.006853361 | 0.010311473 | 0.507401503 |
| c18.c0                     | 0.000609167  | 0.000916676 | 0.50746224  |
| lysopcac281.acetylmithoine | -0.049826268 | 0.074990852 | 0.507531098 |
| pcaac424.c3                | -0.035336705 | 0.05318443  | 0.507539428 |
| smc160.pcaac385            | -0.017232437 | 0.025939446 | 0.507593624 |
| c12.pcaac421               | 0.01014188   | 0.015267587 | 0.507630664 |
| smc240.lysopcac281         | -0.00900058  | 0.013549602 | 0.507634665 |
| smohc222.smc260            | 0.030449842  | 0.04584108  | 0.507648067 |
| pcaac362.smc261            | 0.029088826  | 0.043792827 | 0.507654892 |
| pcaec401.pcaec383          | 0.109375195  | 0.164681364 | 0.507702535 |
| pcaac424.pcaec361          | 0.010190553  | 0.01534469  | 0.507736463 |
| lysopcac160.pcaec340       | -0.049991444 | 0.075286702 | 0.507797145 |
| pcaac402.pcaac321          | 0.009209241  | 0.013871942 | 0.507885755 |
| c2.c12                     | 0.069734109  | 0.105046919 | 0.507909789 |
| pcaac281.pcaec343          | -0.059280133 | 0.089334562 | 0.508077818 |
| pcaec422.c0                | 0.00046994   | 0.000708233 | 0.508100344 |
| arginine.smc160            | -0.065305945 | 0.098431637 | 0.508147682 |
| pcaec342.c0                | 0.000344335  | 0.000519014 | 0.508162734 |
| pcaec380.c162              | -0.046002531 | 0.069348564 | 0.508219597 |
| pcaec322.c51dc             | -0.092605293 | 0.139611518 | 0.508248546 |
| pcaec341.smc260            | 0.020314968  | 0.030631881 | 0.508318839 |
| c8.pcaec443                | -0.041648506 | 0.062810358 | 0.508391269 |
| pcaac424.pcaac300          | -0.049376008 | 0.074479609 | 0.508478584 |
| pcaac422.pcaac380          | -0.052490754 | 0.079199047 | 0.508591382 |
| pcaac361.pcaec386          | 0.003864658  | 0.005831223 | 0.508602544 |
| pcaac403.pcaac360          | -0.044014253 | 0.066411419 | 0.508603341 |
| pcaac402.asparagine        | 0.015447288  | 0.023307899 | 0.508604761 |
| smc181.putrescine          | -0.02284055  | 0.034477402 | 0.50877733  |
| pcaec343.c0                | 0.000272551  | 0.000411462 | 0.508829962 |
| c3.transhydroxyproline     | 0.033849392  | 0.051106986 | 0.508876134 |
| pcaec421.pcaec444          | -0.128194577 | 0.193557878 | 0.508887631 |
| pcaec404.pcaac321          | 0.008191533  | 0.012368579 | 0.508900703 |
| c142.c102                  | -0.041205588 | 0.062218631 | 0.508910163 |
| pcaac424.c102              | -0.02745423  | 0.04146487  | 0.509014103 |
| lysopcac181.pcaec402       | -0.019096657 | 0.028847443 | 0.509090978 |
| c18.lysopcac170            | -0.04532952  | 0.068474953 | 0.509091612 |
| pcaec300.lysine            | -0.042681225 | 0.064479922 | 0.509127654 |

|                       |              |             |             |
|-----------------------|--------------|-------------|-------------|
| pcaac384.pcaac360     | 0.015829387  | 0.023915492 | 0.509154521 |
| pcaec406.pcaac323     | 0.07167698   | 0.108314066 | 0.509242104 |
| alanine.pcaec444      | 0.057878874  | 0.087467099 | 0.509261074 |
| smc160.pcaec383       | -0.047459299 | 0.071722988 | 0.509273163 |
| glycine.smc260        | -0.022152788 | 0.033486269 | 0.509371795 |
| pcaec300.c51dc        | -0.074977247 | 0.113348893 | 0.509419912 |
| pcaec360.h1           | 0.002499267  | 0.003779565 | 0.509557563 |
| c51.asparagine        | 0.004822736  | 0.007294255 | 0.509614228 |
| pcaac384.pcaec361     | -0.007237894 | 0.010952015 | 0.509803417 |
| pcaac323.pcaac364     | -0.026913859 | 0.040733278 | 0.509892465 |
| c141.pcaec360         | -0.006137237 | 0.009288882 | 0.509909126 |
| pcaec425.creatinine   | -0.006702864 | 0.010145323 | 0.509923668 |
| smc241.pcaac240       | -0.008061656 | 0.012202727 | 0.509950125 |
| pcaec361.lysopcac170  | -0.020030302 | 0.030321698 | 0.509982598 |
| smohc221.pcaac322     | -0.045795575 | 0.069325469 | 0.509985784 |
| pcaac344.pcaac360     | 0.030523389  | 0.046211422 | 0.51003176  |
| c3.c12                | -0.022895923 | 0.034671951 | 0.510132473 |
| pcaec423.pcaec380     | -0.073208176 | 0.110863622 | 0.510141572 |
| pcaec342.smc241       | -0.063444344 | 0.096078768 | 0.510146467 |
| pcaac360.pcaac343     | 0.033118603  | 0.050158069 | 0.510179804 |
| pcaec401.valine       | -0.034030315 | 0.051559773 | 0.510351171 |
| pcaec386.c162         | -0.044793682 | 0.067868435 | 0.510357052 |
| pcaec322.pcaec301     | -0.044657434 | 0.06766998  | 0.510406836 |
| c5.pcaec402           | 0.061338591  | 0.092962615 | 0.510477081 |
| lysopcac280.ornithine | 0.09569956   | 0.145046498 | 0.510499216 |
| pcaec403.pcaec360     | -0.004514066 | 0.006841919 | 0.51051159  |
| pcaec321.pcaac386     | 0.010907488  | 0.016533856 | 0.510549856 |
| pcaec424.lysopcac182  | -0.069674846 | 0.105657781 | 0.510720974 |
| pcaac380.smohc141     | -0.029522086 | 0.044770964 | 0.51074423  |
| pcaac402.pcaec380     | 0.11572729   | 0.175534362 | 0.510819012 |
| pcaec405.smc260       | 0.027967183  | 0.042421628 | 0.510830912 |
| pcaac405.pcaac240     | 0.009758508  | 0.014807094 | 0.510974507 |
| pcaec443.pcaac384     | 0.031146409  | 0.047278156 | 0.511135886 |
| pcaac424.c51          | -0.067784297 | 0.102893142 | 0.511140534 |
| smohc161.c142         | -0.045406467 | 0.068934671 | 0.511201392 |
| pcaac404.lysopcac204  | -0.009365234 | 0.014218949 | 0.511229423 |
| methionine.c162       | 0.057898207  | 0.087931094 | 0.5113542   |
| smc241.pcaec361       | 0.010761503  | 0.016345172 | 0.511392264 |
| pcaec322.pcaac300     | 0.050296883  | 0.076399806 | 0.51142588  |
| pcaac362.pcaac240     | -0.012022477 | 0.018266248 | 0.511527024 |
| lysopcac280.smc161    | 0.067920594  | 0.1031975   | 0.511538993 |
| pcaec422.asparagine   | 0.008446089  | 0.012839828 | 0.511767917 |
| pcaec420.pcaec362     | 0.007747811  | 0.011779755 | 0.511820015 |



|                              |              |             |             |
|------------------------------|--------------|-------------|-------------|
| h1.pcaec343                  | -0.04149723  | 0.063094159 | 0.511832432 |
| ornithine.methionine         | -0.025237213 | 0.038373674 | 0.511853722 |
| serotonin.c2                 | -0.053355522 | 0.081139793 | 0.511914397 |
| c2.kynurenine                | -0.009970004 | 0.015162904 | 0.511945942 |
| pcaac365.pcaac403            | 0.012252571  | 0.018635055 | 0.51196186  |
| lysopcac180.smc260           | -0.027031329 | 0.041121361 | 0.512055613 |
| pcaec300.smc261              | 0.041255726  | 0.062766845 | 0.512100216 |
| pcaac420.pcaec322            | 0.054697899  | 0.083227354 | 0.51214811  |
| pcaec401.creatinine          | -0.018752617 | 0.02853832  | 0.512217055 |
| pcaac381.c2                  | -0.051319857 | 0.07811524  | 0.512298331 |
| lysopcac281.c14              | -0.035474489 | 0.053999672 | 0.512322218 |
| prolinr.pcaec322             | 0.046168205  | 0.070300986 | 0.512461309 |
| asparagine.c162              | 0.051138829  | 0.077913756 | 0.512698751 |
| kynurenine.pcaec423          | -0.013049389 | 0.019883254 | 0.512731644 |
| pcaec364.pcaec425            | -0.004655715 | 0.007094161 | 0.512748491 |
| c18.pcaac323                 | -0.055322957 | 0.084301666 | 0.512764078 |
| pcaec445.lysopcac281         | 0.006832117  | 0.010412584 | 0.512834243 |
| glutamine.pcaac404           | -0.005637866 | 0.008593461 | 0.512882906 |
| pcaac426.pcaec363            | -0.027615829 | 0.042119254 | 0.5131437   |
| pcaac322.pcaac406            | -0.039928285 | 0.060903577 | 0.513182008 |
| pcaec402.c14                 | 0.049286747  | 0.075186701 | 0.513229215 |
| glycine.alanine              | -0.009117999 | 0.013909944 | 0.513243708 |
| pcaec386.pcaec422            | -0.014369775 | 0.021926133 | 0.513327221 |
| pcaec445.isoleucine          | 0.013874512  | 0.021177216 | 0.513461883 |
| pcaec381.c102                | -0.037856944 | 0.057788199 | 0.513502986 |
| pcaec385.methioninesulfoxide | 0.009840773  | 0.015022916 | 0.513533407 |
| pcaac385.lysopcac204         | -0.010955448 | 0.016725005 | 0.513544125 |
| pcaec382.serotonin           | -0.079334773 | 0.121125413 | 0.51357858  |
| pcaac344.arginine            | 0.034972458  | 0.053396313 | 0.513591583 |
| pcaac385.pcaec363            | -0.019997165 | 0.030533308 | 0.513611237 |
| lysine.pcaec322              | 0.069433904  | 0.10603702  | 0.513689169 |
| c141oh.pcaec361              | -0.007182014 | 0.010969289 | 0.513734016 |
| smc180.lysopcac281           | -0.01758259  | 0.026860029 | 0.513822435 |
| smohc141.pcaac421            | -0.018852281 | 0.028801717 | 0.513852278 |
| lysopcac281.pcaec360         | -0.005784629 | 0.00883764  | 0.513858419 |
| citruline.pcaec405           | -0.038027721 | 0.058098186 | 0.513859832 |
| pcaec381.pcaac323            | -0.05198307  | 0.079427965 | 0.513907478 |
| pcaac404.c2                  | 0.048738231  | 0.07447547  | 0.513938424 |
| pcaec425.lysopcac281         | 0.007027499  | 0.010740747 | 0.514025726 |
| pcaec382.pcaec343            | 0.04122751   | 0.063019983 | 0.514081306 |
| c10.smc181                   | 0.018682312  | 0.028566117 | 0.514206487 |
| c101.pcaec341                | -0.041286384 | 0.063132113 | 0.514228629 |
| pcaec343.pcaac380            | 0.054246422  | 0.08295831  | 0.514272463 |

|                          |              |             |             |
|--------------------------|--------------|-------------|-------------|
| pcaec405.pcaac364        | -0.037347902 | 0.057128493 | 0.514367    |
| asparticacid.lysopcac161 | 0.056083613  | 0.085792142 | 0.514391149 |
| pcaac426.lysopcac181     | 0.02271685   | 0.034754806 | 0.514444559 |
| lysopcac280.pcaac323     | 0.065423049  | 0.10010836  | 0.514514948 |
| smc160.lysopcac203       | -0.008755227 | 0.013397163 | 0.514520604 |
| pcaac402.pcaec446        | 0.063766776  | 0.097576406 | 0.514525384 |
| pcaec401.pcaec404        | 0.016786254  | 0.025687687 | 0.514545537 |
| pcaac300.arginine        | -0.047370348 | 0.072496582 | 0.514583967 |
| pcaec343.c2              | -0.031246846 | 0.047849658 | 0.514836918 |
| h1.c141oh                | 0.050709281  | 0.07765437  | 0.514842521 |
| creatinine.c141oh        | 0.080020981  | 0.122564008 | 0.514920441 |
| c4.pcaec402              | 0.038086779  | 0.058349597 | 0.515021446 |
| c182.pcaec362            | 0.011321112  | 0.017350661 | 0.515179196 |
| pcaac401.pcaec343        | 0.064408027  | 0.098713829 | 0.515189911 |
| c162.pcaac361            | -0.028275719 | 0.043340595 | 0.51523165  |
| lysopcac180.c12          | 0.041819546  | 0.064102002 | 0.515242333 |
| putrescine.smc202        | -0.024215707 | 0.037118698 | 0.515245532 |
| pcaec421.acetylnithoine  | 0.029877446  | 0.045805864 | 0.515324757 |
| c182.pcaac381            | -0.006467026 | 0.00991793  | 0.515458847 |
| lysopcac181.pcaec406     | 0.008373687  | 0.012843792 | 0.515516855 |
| alanine.pcaac381         | 0.009487937  | 0.014553637 | 0.515539263 |
| pcaec403.lysopcac182     | 0.036704942  | 0.056306392 | 0.515571507 |
| c101.pcaac322            | 0.032583702  | 0.049988105 | 0.515603453 |
| smohc141.putrescine      | -0.01807916  | 0.02774268  | 0.515703774 |
| c18.pcaac365             | -0.028341062 | 0.043490253 | 0.515709219 |
| pcaec403.smc202          | -0.057451585 | 0.088181355 | 0.515804717 |
| pcaec404.serotonin       | -0.083374564 | 0.127977522 | 0.515829202 |
| pcaac360.pcaac406        | -0.045524659 | 0.069879405 | 0.515831493 |
| c182.pcaac323            | -0.056407555 | 0.086588675 | 0.51585207  |
| pcaec380.c141            | 0.051438874  | 0.07899751  | 0.516043255 |
| pcaec341.pcaac365        | -0.031115919 | 0.04778653  | 0.516044135 |
| serine.c3                | -0.021837241 | 0.033540532 | 0.516091731 |
| pcaec383.asparticacid    | -0.032722388 | 0.050260735 | 0.516102975 |
| pcaec406.acetylnithoine  | -0.020724925 | 0.031835871 | 0.516141486 |
| pcaec384.pcaec383        | 0.049973464  | 0.076768163 | 0.516158775 |
| c0.pcaec380              | 0.03934364   | 0.060449256 | 0.516230856 |
| smohc221.pcaac421        | -0.022696458 | 0.034872756 | 0.516242201 |
| pcaec363.c162            | 0.067782986  | 0.104149835 | 0.516251571 |
| phenylalanine.pcaac344   | -0.063690906 | 0.097866514 | 0.516269702 |
| pcaac343.smc161          | -0.040518476 | 0.062265374 | 0.516305206 |
| pcaec381.c141            | 0.026875543  | 0.041305575 | 0.516361071 |
| pcaac344.pcaac422        | -0.029706282 | 0.045661257 | 0.516407493 |
| asparticacid.pcaec444    | -0.084165549 | 0.129381921 | 0.516445746 |

|                       |              |             |             |
|-----------------------|--------------|-------------|-------------|
| c102.pcaec301         | 0.074928453  | 0.115223283 | 0.516594468 |
| smohc222.pcaec383     | -0.043813679 | 0.067386729 | 0.51666308  |
| pcaac320.pcaac322     | -0.062173765 | 0.095628944 | 0.516679991 |
| pcaac365.c18          | 0.043780785  | 0.067362039 | 0.516824079 |
| c51dc.pcaac240        | -0.016621492 | 0.025578092 | 0.516888123 |
| pcaec386.pcaec420     | -0.019758704 | 0.030407774 | 0.516915139 |
| pcaec360.smohc241     | 0.058841998  | 0.090565578 | 0.51696292  |
| smohc161.pcaec382     | -0.012179722 | 0.018748041 | 0.517004114 |
| lysopcac180.smc241    | -0.026871369 | 0.041363215 | 0.517009891 |
| pcaec362.pcaac384     | 0.025663463  | 0.039519849 | 0.517178985 |
| spermidine.histidine  | -0.024295936 | 0.037415809 | 0.517199691 |
| pcaac281.smohc241     | 0.051969792  | 0.080037751 | 0.517221258 |
| pcaec384.pcaec424     | 0.025778516  | 0.039706393 | 0.517277736 |
| pcaec406.pcaac364     | -0.033020214 | 0.050864319 | 0.517307414 |
| pcaac421.smohc161     | 0.010347619  | 0.015939902 | 0.517318863 |
| pcaac361.c18          | 0.032040508  | 0.049368401 | 0.517419447 |
| lysopcac203.pcaec362  | -0.015688539 | 0.024173121 | 0.517419973 |
| pcaac380.pcaec360     | -0.003513043 | 0.00541404  | 0.517504562 |
| pcaec422.pcaec322     | 0.049520087  | 0.076320335 | 0.51752459  |
| pcaec343.lysopcac181  | 0.045001732  | 0.069366456 | 0.517583716 |
| smohc141.glutamicacid | 0.028506347  | 0.043940976 | 0.517591268 |
| pcaec360.pcaec343     | 0.064867569  | 0.100006218 | 0.517659868 |
| pcaac405.pcaec383     | 0.038865622  | 0.059919814 | 0.517665123 |
| pcaec363.valine       | -0.034657938 | 0.05344714  | 0.51777766  |
| pcaec362.asparagine   | 0.009493631  | 0.014641434 | 0.517806095 |
| pcaec402.pcaac426     | 0.0594574    | 0.091716519 | 0.517893053 |
| pcaac420.kynurenine   | 0.011894938  | 0.018349002 | 0.517901344 |
| c141.pcaac322         | -0.042535962 | 0.065644991 | 0.518089042 |
| pcaac323.pcaec383     | -0.049443211 | 0.076327324 | 0.518212222 |
| pcaec444.pcaec446     | 0.039867906  | 0.061555737 | 0.518281228 |
| alanine.pcaac426      | -0.03339695  | 0.051566846 | 0.518299164 |
| c3.pcaec385           | 0.031549365  | 0.048717391 | 0.518327675 |
| pcaac344.c101         | -0.00279333  | 0.004313851 | 0.518375303 |
| pcaac406.pcaec405     | -0.04345681  | 0.067112824 | 0.518379866 |
| pcaac240.serotonin    | -0.100543984 | 0.155278769 | 0.518387867 |
| pcaac383.c101         | 0.005679142  | 0.008771746 | 0.518433371 |
| pcaec446.c4           | -0.014441541 | 0.022306003 | 0.518438105 |
| pcaec360.smc160       | -0.074998433 | 0.115840778 | 0.518439112 |
| h1.pcaac384           | 0.054531925  | 0.08423512  | 0.518470936 |
| smohc222.histidine    | -0.047136005 | 0.072811078 | 0.518473167 |
| glutamicacid.pcaec402 | -0.063327581 | 0.09783214  | 0.518515444 |
| c51.pcaec422          | 0.014276495  | 0.022056522 | 0.51854119  |
| pcaac422.pcaec445     | -0.084076338 | 0.129905177 | 0.518576993 |

|                              |              |             |             |
|------------------------------|--------------|-------------|-------------|
| pcaec406.pcaac344            | 0.051881266  | 0.080168132 | 0.518614034 |
| lysopcac140.lysopcac161      | -0.076172068 | 0.117720132 | 0.518675362 |
| pcaec361.pcaac381            | 0.030109989  | 0.046533676 | 0.518677059 |
| phenylalanine.c18            | 0.030639043  | 0.047356411 | 0.518722072 |
| glutamicacid.pcaec363        | 0.036629862  | 0.056627091 | 0.518804151 |
| pcaac381.pcaec301            | -0.06123171  | 0.094660482 | 0.518807368 |
| pcaac344.smc181              | -0.012954849 | 0.020030924 | 0.518880704 |
| alphaaminoadipicacid.c0      | -0.000392285 | 0.000606625 | 0.518928963 |
| c51.smc240                   | 0.041234393  | 0.063764993 | 0.518932674 |
| c51.lysopcac181              | -0.03932202  | 0.06081056  | 0.51895235  |
| ornithine.lysopcac204        | 0.019269861  | 0.029805863 | 0.519029155 |
| c8.pcaac402                  | 0.013298242  | 0.02057311  | 0.519108529 |
| c4.prolinr                   | 0.015944621  | 0.024667938 | 0.519120957 |
| c141.pcaac383                | 0.011522474  | 0.01782989  | 0.519201892 |
| pcaac406.pcaac240            | -0.015067477 | 0.023317013 | 0.519230192 |
| methioninesulfoxide.pcaec362 | 0.016023142  | 0.024795911 | 0.519230202 |
| methionine.pcaac281          | 0.004709369  | 0.007287868 | 0.519235357 |
| serine.pcaec321              | 0.020858317  | 0.032278917 | 0.519237228 |
| pcaec425.pcaec382            | -0.01536436  | 0.023780122 | 0.519294787 |
| methionine.pcaac344          | 0.036632082  | 0.056697228 | 0.51929537  |
| pcaac405.spermidine          | -0.046722108 | 0.072327581 | 0.519373442 |
| pcaec422.pcaec383            | -0.077900513 | 0.120598677 | 0.519393331 |
| lysopcac182.c142             | -0.07254823  | 0.112319717 | 0.519419217 |
| c14.c8                       | 0.031173116  | 0.048293209 | 0.519684863 |
| arginine.c141                | -0.031353604 | 0.048573555 | 0.519691162 |
| pcaac426.pcaec362            | -0.009680107 | 0.014998704 | 0.519749882 |
| lysopcac203.pcaac361         | -0.053932506 | 0.083564993 | 0.519750074 |
| pcaec300.pcaec341            | 0.068860476  | 0.106715539 | 0.519830567 |
| pcaec421.pcaac300            | -0.043542773 | 0.067508624 | 0.520008606 |
| pcaec342.pcaec401            | 0.055842211  | 0.086582723 | 0.520033042 |
| pcaac360.pcaac402            | 0.056974625  | 0.08833963  | 0.520038283 |
| pcaac360.pcaec422            | -0.015424133 | 0.023915639 | 0.520045118 |
| lysopcac182.pcaec362         | -0.013499079 | 0.020933544 | 0.520100201 |
| pcaac406.methioninesulfoxide | 0.025407028  | 0.039402435 | 0.520129512 |
| pcaac406.pcaec343            | 0.057308932  | 0.08891064  | 0.520285141 |
| pcaac422.pcaec321            | 0.012801932  | 0.019862593 | 0.520312977 |
| pcaac365.methionine          | -0.023840396 | 0.036989941 | 0.520322305 |
| pcaac422.pcaac406            | -0.034533351 | 0.053582799 | 0.520338135 |
| pcaac421.smohc141            | -0.021923901 | 0.034018252 | 0.520345315 |
| smohc221.isoleucine          | 0.015422278  | 0.023933181 | 0.520400702 |
| glycine.glutamicacid         | 0.034669836  | 0.053806583 | 0.520431114 |
| pcaac386.serine              | 0.037019143  | 0.05745691  | 0.520462068 |
| pcaac321.pcaac281            | -0.00571349  | 0.008870466 | 0.520585831 |

|                                |              |             |             |
|--------------------------------|--------------|-------------|-------------|
| c142.methioninesulfoxide       | 0.010889344  | 0.016911484 | 0.520715284 |
| smc180.pcaec343                | -0.04415521  | 0.068575486 | 0.520721923 |
| pcaac321.pcaac383              | 0.005792446  | 0.008996281 | 0.520735425 |
| smc161.pcaac380                | 0.04137555   | 0.064264176 | 0.520758566 |
| asparticacid.pcaec403          | 0.033874214  | 0.052618863 | 0.520803677 |
| pcaec444.c4                    | -0.013084864 | 0.020327159 | 0.520837441 |
| lysopcac160.glutamicacid       | 0.027242842  | 0.042325663 | 0.520879507 |
| smohc241.lysopcac204           | 0.016523847  | 0.025680131 | 0.521008607 |
| c12.smohc241                   | -0.064208286 | 0.099788655 | 0.521012456 |
| smohc141.pcaac386              | 0.007492084  | 0.011643817 | 0.521014996 |
| pcaec381.pcaec444              | -0.086859218 | 0.135013036 | 0.521079238 |
| pcaac384.leucine               | -0.00536033  | 0.008332278 | 0.52109112  |
| c162.asymmetricdimethylarginin | -0.006169079 | 0.009593835 | 0.521282416 |
| smohc222.isoleucine            | 0.018733418  | 0.029135641 | 0.52131657  |
| pcaec381.pcaec443              | 0.212254884  | 0.330150858 | 0.521361774 |
| pcaac384.smohc161              | -0.022286424 | 0.034673349 | 0.521458181 |
| pcaac322.pcaec341              | 0.057587859  | 0.089605663 | 0.521505214 |
| kynurenine.c162                | 0.080945821  | 0.125951812 | 0.521510445 |
| pcaac341.pcaec386              | 0.004621724  | 0.007191785 | 0.521532205 |
| pcaec340.lysopcac160           | -0.042289726 | 0.065808004 | 0.521542868 |
| pcaac422.c51dc                 | 0.086743172  | 0.134986108 | 0.521552371 |
| pcaac281.pcaec383              | -0.035018543 | 0.054499127 | 0.521588465 |
| leucine.pcaac321               | 0.022288205  | 0.034687373 | 0.521593098 |
| pcaec443.c2                    | 0.069202049  | 0.107700984 | 0.521597313 |
| lysopcac161.c8                 | -0.039084586 | 0.060838094 | 0.521663721 |
| pcaac422.prolinr               | -0.026261596 | 0.04087953  | 0.521677793 |
| c101.pcaac403                  | 0.002415083  | 0.00375958  | 0.521699327 |
| c51.pcaac363                   | 0.004941615  | 0.007693147 | 0.521725947 |
| pcaec445.smc260                | 0.037287963  | 0.058050428 | 0.521727558 |
| c5.pcaac422                    | 0.027998619  | 0.043589212 | 0.521732957 |
| pcaec404.pcaec444              | -0.10505706  | 0.163582165 | 0.52179833  |
| pcaec381.lysopcac160           | 0.014400858  | 0.022423681 | 0.521805809 |
| leucine.pcaac361               | 0.034118946  | 0.053127004 | 0.521806946 |
| pcaec424.pcaac240              | -0.011376873 | 0.01771527  | 0.521811881 |
| pcaec340.pcaec383              | 0.055923193  | 0.087083718 | 0.521831149 |
| pcaac281.pcaac385              | 0.043595693  | 0.06789068  | 0.521851793 |
| pcaac361.pcaec422              | -0.011384963 | 0.017731307 | 0.521892523 |
| pcaec301.arginine              | 0.019471322  | 0.030327071 | 0.521917305 |
| smc261.lysopcac170             | -0.015403415 | 0.023995338 | 0.521988898 |
| pcaac385.pcaac403              | -0.005419194 | 0.008442127 | 0.521995944 |
| pcaac362.pcaec403              | 0.043231408  | 0.067369919 | 0.522138926 |
| pcaec364.alanine               | -0.016456571 | 0.025646564 | 0.522161129 |
| lysopcac140.c10                | 0.006464777  | 0.010076706 | 0.522233065 |

|                        |              |             |             |
|------------------------|--------------|-------------|-------------|
| c18.pcaec425           | -0.006524353 | 0.010169708 | 0.522238801 |
| c16.c141               | 0.009692662  | 0.015111582 | 0.522330458 |
| c0.phenylalanine       | -0.020218618 | 0.031525984 | 0.522378575 |
| putrescine.pcaec342    | 0.046258762  | 0.072135388 | 0.522414127 |
| pcaec401.c16           | 0.014460717  | 0.022554205 | 0.522493806 |
| pcaec342.pcaac341      | 0.018017619  | 0.028104078 | 0.522526566 |
| pcaec363.lysopcac280   | -0.00916959  | 0.014306405 | 0.522630424 |
| citruline.pcaac381     | 0.035090319  | 0.054751656 | 0.522658499 |
| putrescine.smohc241    | -0.026950384 | 0.042054432 | 0.522693737 |
| smc261.acetylnithoine  | -0.012986003 | 0.020264149 | 0.522699524 |
| glycine.pcaac404       | -0.004160506 | 0.006492671 | 0.522722777 |
| smc202.c102            | 0.02111224   | 0.032949707 | 0.522761049 |
| spermidine.c51         | -0.083029145 | 0.129589738 | 0.522782855 |
| pcaec443.pcaac240      | -0.016138377 | 0.025188852 | 0.522790941 |
| pcaec341.glycine       | -0.031073492 | 0.04850036  | 0.522797053 |
| pcaec404.smohc141      | -0.015519847 | 0.024224201 | 0.522803864 |
| pcaec341.pcaec342      | -0.095609079 | 0.149273896 | 0.522921134 |
| c12.threonine          | 0.021064223  | 0.032888493 | 0.522934308 |
| pcaac322.lysopcac182   | -0.009189153 | 0.014348258 | 0.522958354 |
| pcaac300.lysopcac182   | -0.012480081 | 0.019494485 | 0.523121431 |
| c16.pcaac384           | -0.009593432 | 0.014986556 | 0.523153416 |
| pcaac420.pcaac404      | -0.004261194 | 0.006656858 | 0.523163099 |
| pcaec365.lysine        | 0.057191676  | 0.089347415 | 0.52317378  |
| pcaec383.pcaac422      | -0.105141837 | 0.164257721 | 0.523174803 |
| smc241.c0              | 0.000309264  | 0.000483197 | 0.523217163 |
| arginine.pcaac322      | 0.032966726  | 0.05150868  | 0.523226738 |
| kynurenine.lysopcac180 | 0.027659373  | 0.043222011 | 0.523282167 |
| smc181.pcaac385        | -0.011783551 | 0.0184144   | 0.523300081 |
| pcaec364.pcaac344      | 0.04083127   | 0.063817032 | 0.523359611 |
| smc160.lysopcac180     | 0.049658441  | 0.077615742 | 0.523372037 |
| pcaac361.pcaac385      | -0.046832959 | 0.073203081 | 0.523392122 |
| lysine.pcaac421        | 0.023195588  | 0.03626111  | 0.523447441 |
| c141.pcaec386          | 0.00230902   | 0.003609657 | 0.523449958 |
| asparticacid.pcaac422  | 0.020864405  | 0.032619156 | 0.523477056 |
| pcaec381.spermidine    | 0.043422048  | 0.067895813 | 0.52354005  |
| smc161.c102            | 0.017328342  | 0.02709604  | 0.523555467 |
| glutamine.pcaec341     | 0.036314436  | 0.056785194 | 0.52356213  |
| pcaac401.pcaec402      | -0.110439122 | 0.17269475  | 0.523562494 |
| arginine.pcaac402      | 0.032824814  | 0.051343904 | 0.523686999 |
| c181.pcaac404          | 0.003580639  | 0.005601039 | 0.52370749  |
| pcaac360.putrescine    | -0.030293121 | 0.047395148 | 0.523785554 |
| smc181.lysopcac161     | -0.046912977 | 0.073398616 | 0.523790341 |
| lysopcac160.leucine    | 0.007093156  | 0.011099191 | 0.523844661 |

|                         |              |             |             |
|-------------------------|--------------|-------------|-------------|
| pcaec341.pcaec386       | 0.003254975  | 0.005094607 | 0.523950801 |
| pcaac405.pcaec425       | -0.009036616 | 0.014143998 | 0.523953976 |
| pcaec340.c8             | -0.032754524 | 0.051275155 | 0.524020149 |
| pcaec402.kynurenine     | -0.004708608 | 0.007371973 | 0.524073101 |
| c12.pcaec384            | 0.023685749  | 0.037083775 | 0.52407846  |
| pcaec420.pcaac300       | -0.027859609 | 0.043621243 | 0.524103468 |
| pcaac320.c141oh         | -0.05817991  | 0.091110122 | 0.524170781 |
| smc261.pcaec446         | -0.014865581 | 0.023280026 | 0.524178407 |
| pcaac420.pcaec385       | -0.0397717   | 0.062287887 | 0.524204983 |
| pcaac366.pcaac384       | 0.037659739  | 0.058992817 | 0.524293101 |
| pcaec443.lysopcac280    | -0.008930067 | 0.013988792 | 0.524296592 |
| pcaec402.pcaec424       | 0.016992995  | 0.026622409 | 0.524346121 |
| c141.pcaec382           | -0.010129412 | 0.015869686 | 0.524352501 |
| c181.c10                | 0.007535987  | 0.011808832 | 0.524431345 |
| pcaec386.alanine        | -0.0107941   | 0.016916532 | 0.524486759 |
| leucine.c142            | 0.049931227  | 0.078252917 | 0.524489994 |
| pcaac422.smc161         | 0.100297676  | 0.157188219 | 0.524490779 |
| h1.lysopcac170          | -0.019912632 | 0.031212197 | 0.524554223 |
| methioninesulfoxide.c2  | 0.11291132   | 0.177015889 | 0.524629635 |
| pcaac300.pcaec362       | 0.016066756  | 0.025189258 | 0.524641465 |
| pcaac386.pcaec363       | -0.018913318 | 0.029652132 | 0.524642437 |
| pcaec445.pcaec343       | -0.050799608 | 0.079651519 | 0.524685813 |
| pcaec381.pcaac420       | 0.072225355  | 0.113248733 | 0.524695317 |
| pcaac366.pcaec401       | 0.040171535  | 0.062998039 | 0.524757208 |
| c102.alanine            | -0.018206221 | 0.02856574  | 0.524964074 |
| pcaac366.pcaac403       | 0.007374727  | 0.011571642 | 0.524986347 |
| h1.lysopcac204          | -0.034137437 | 0.053566489 | 0.524998935 |
| pcaac360.c14            | -0.07133511  | 0.111955754 | 0.525075935 |
| pcaec401.pcaac384       | 0.025060892  | 0.039332399 | 0.525086248 |
| pcaac426.pcaac320       | 0.088971933  | 0.139653033 | 0.525127628 |
| pcaac422.lysopcac181    | -0.050321726 | 0.078997014 | 0.525182683 |
| c141oh.pcaac406         | 0.029813165  | 0.046812961 | 0.525280677 |
| pcaac362.c14            | -0.018255876 | 0.028673153 | 0.525389964 |
| c2.pcaec385             | -0.041831705 | 0.06570441  | 0.525405359 |
| citruiline.pcaec342     | 0.045541561  | 0.071541788 | 0.525465283 |
| lysopcac280.arginine    | -0.027906432 | 0.043851201 | 0.525584579 |
| c5.pcaac383             | -0.005945684 | 0.009342857 | 0.525585216 |
| smc180.lysopcac180      | 0.054393692  | 0.085483944 | 0.525640581 |
| smc202.lysopcac161      | -0.051729448 | 0.081310445 | 0.52570957  |
| c12.methioninesulfoxide | 0.011256118  | 0.017693544 | 0.525726425 |
| lysopcac181.smohc141    | -0.034432418 | 0.054136001 | 0.525814415 |
| pcaac362.pcaac361       | 0.06300939   | 0.099070934 | 0.525835664 |
| pcaac420.pcaac240       | -0.013750528 | 0.021621665 | 0.525863055 |

|                           |              |             |             |
|---------------------------|--------------|-------------|-------------|
| lysopcac180.h1            | -0.001009726 | 0.001587906 | 0.525912075 |
| pcaec380.lysopcac182      | -0.020343947 | 0.031994551 | 0.525930647 |
| pcaac381.c0               | 0.000487918  | 0.000767396 | 0.525961073 |
| methionine.lysopcac180    | 0.035682376  | 0.056123372 | 0.525977458 |
| smc261.lysopcac161        | -0.035795602 | 0.056307362 | 0.526020768 |
| pcaec446.smohc161         | 0.010300045  | 0.016202435 | 0.526026153 |
| c4.asparagine             | -0.007353122 | 0.011568125 | 0.526073741 |
| pcaec383.pcaac386         | 0.028184808  | 0.044348429 | 0.526142196 |
| arginine.ornithine        | -0.02242246  | 0.035282639 | 0.526156125 |
| c51dc.pcaec386            | 0.014710609  | 0.023152498 | 0.526241164 |
| pcaec365.acetylornithoine | -0.036058478 | 0.056753345 | 0.526257199 |
| ornithine.c5              | -0.008724155 | 0.013732911 | 0.526309669 |
| lysopcac182.pcaac365      | 0.029411196  | 0.046300775 | 0.526344223 |
| pcaec402.putrescine       | -0.043716691 | 0.068842672 | 0.52647246  |
| smc161.pcaac300           | 0.03760328   | 0.059216991 | 0.526482133 |
| smc241.pcaec301           | -0.041834801 | 0.065887752 | 0.52652622  |
| c8.c0                     | -0.000630173 | 0.0009925   | 0.526529573 |
| pcaac281.lysine           | -0.037076213 | 0.058399703 | 0.526572128 |
| lysopcac182.pcaec341      | 0.026417382  | 0.041624695 | 0.52671092  |
| pcaac421.pcaec446         | 0.05719438   | 0.090120399 | 0.526718963 |
| pcaac365.glycine          | 0.025969017  | 0.040919234 | 0.526721078 |
| pcaac320.smohc221         | 0.043761049  | 0.06895726  | 0.526740367 |
| pcaec381.c101             | -0.051965368 | 0.081898618 | 0.526807171 |
| pcaac342.valine           | -0.024395395 | 0.038453845 | 0.52687308  |
| pcaac320.smc160           | 0.04951909   | 0.078062886 | 0.526911114 |
| pcaac406.smc161           | -0.04516679  | 0.07120279  | 0.526916655 |
| ornithine.pcaac361        | -0.059847624 | 0.094363487 | 0.526991987 |
| pcaec322.pcaac422         | -0.018331613 | 0.028904583 | 0.527000501 |
| pcaac424.pcaec404         | 0.050737991  | 0.080004277 | 0.527013716 |
| pcaec403.c141             | 0.030331431  | 0.04782745  | 0.527017892 |
| pcaac240.c142             | 0.026259866  | 0.041408668 | 0.527031595 |
| serine.pcaac421           | -0.032313908 | 0.050957816 | 0.527053037 |
| lysopcac181.pcaac240      | -0.01015967  | 0.016022086 | 0.527070276 |
| serotonin.pcaac386        | 0.018596134  | 0.029327262 | 0.527079195 |
| pcaec422.pcaac386         | 0.008044334  | 0.012688701 | 0.527153492 |
| pcaec361.c142             | 0.025137563  | 0.039652997 | 0.527177958 |
| glutamicacid.pcaac341     | -0.007538088 | 0.011891109 | 0.527185849 |
| pcaac321.serine           | 0.048418555  | 0.076393094 | 0.527262898 |
| c8.pcaac361               | 0.035317938  | 0.0557267   | 0.527287318 |
| c8.serotonin              | -0.068993308 | 0.108888734 | 0.527389863 |
| pcaec301.pcaec380         | 0.04091512   | 0.064590574 | 0.527493673 |
| pcaac405.pcaec385         | 0.066124003  | 0.104386813 | 0.527494799 |
| glycine.pcaac366          | -0.035512253 | 0.056067405 | 0.527538206 |



|                        |              |             |             |
|------------------------|--------------|-------------|-------------|
| creatinine.pcaec322    | 0.041783346  | 0.065973511 | 0.527570627 |
| pcaac366.c162          | -0.044515192 | 0.070292886 | 0.527605507 |
| pcaec321.pcaac323      | 0.030426229  | 0.048050726 | 0.52765173  |
| c18.smohc222           | -0.007121217 | 0.011251104 | 0.527831176 |
| pcaac386.c0            | 0.00053076   | 0.000838631 | 0.527861353 |
| pcaec301.glutamicacid  | 0.042450343  | 0.067075772 | 0.527872528 |
| c14.pcaac344           | -0.054606727 | 0.086299898 | 0.527948102 |
| pcaac425.methionine    | -0.025577111 | 0.040424389 | 0.527974518 |
| pcaec301.pcaec384      | 0.027048945  | 0.042751417 | 0.527982298 |
| c4.tyrosine            | 0.045676278  | 0.072195062 | 0.527998053 |
| pcaec340.pcaec382      | 0.007517526  | 0.011882838 | 0.528025077 |
| c51.pcaec383           | 0.042549867  | 0.067275674 | 0.528133761 |
| smc241.smc260          | 0.027987183  | 0.044259909 | 0.528220519 |
| pcaec421.pcaec386      | 0.00698091   | 0.011040213 | 0.528233888 |
| c4.serine              | 0.024536285  | 0.038809619 | 0.528295664 |
| glutamine.leucine      | -0.003328524 | 0.005266556 | 0.528432604 |
| serotonin.pcaac426     | 0.045971809  | 0.072741184 | 0.528445677 |
| leucine.serotonin      | 0.064397614  | 0.101902137 | 0.52846913  |
| smohc241.pcaec445      | -0.028680358 | 0.045409583 | 0.528705552 |
| c51.spermidine         | -0.045066212 | 0.07135611  | 0.528721821 |
| histidine.pcaac380     | 0.046714442  | 0.073967846 | 0.528732908 |
| lysopcac203.smohc241   | -0.054227502 | 0.085874446 | 0.528782702 |
| serotonin.pcaec401     | 0.0216153    | 0.03423363  | 0.52882755  |
| smc202.lysopcac204     | -0.023543847 | 0.03729172  | 0.528868591 |
| smohc161.pcaac386      | 0.008193818  | 0.012978814 | 0.528881558 |
| pcaac404.phenylalanine | -0.022291443 | 0.035309163 | 0.528882088 |
| pcaac401.pcaec386      | 0.006931987  | 0.010980255 | 0.528887239 |
| c12.c182               | -0.043799182 | 0.069378419 | 0.528890763 |
| pcaec382.pcaac323      | -0.046361625 | 0.073437618 | 0.528892218 |
| lysopcac140.pcaec385   | 0.02614211   | 0.041409772 | 0.528894359 |
| pcaac321.pcaac300      | 0.077125152  | 0.122175727 | 0.528919655 |
| pcaec382.smc241        | -0.022662514 | 0.035900693 | 0.528925199 |
| smc180.smohc161        | -0.015373304 | 0.024353723 | 0.52892841  |
| pcaec422.pcaac240      | -0.009422014 | 0.014926775 | 0.528951236 |
| c102.pcaec380          | -0.03748672  | 0.059389918 | 0.528963606 |
| pcaac385.pcaac404      | -0.02352188  | 0.037267853 | 0.528989238 |
| pcaec364.asparticacid  | -0.040306787 | 0.063864574 | 0.529007707 |
| c162.lysopcac281       | 0.007344736  | 0.011638164 | 0.529032791 |
| pcaec403.c102          | -0.027258729 | 0.043194304 | 0.529044683 |
| leucine.glycine        | 0.028606477  | 0.045332547 | 0.529068234 |
| c5.alanine             | 0.008106811  | 0.012848759 | 0.529130181 |
| lysopcac204.pcaac420   | -0.051299888 | 0.081333907 | 0.52926662  |
| pcaec425.pcaec443      | -0.04879563  | 0.077366883 | 0.529284566 |

|                                |              |             |             |
|--------------------------------|--------------|-------------|-------------|
| c102.c5                        | 0.007003197  | 0.011108501 | 0.529459642 |
| histidine.lysopcac280          | 0.015563982  | 0.024688871 | 0.529479929 |
| pcaec360.c0                    | 0.000504581  | 0.000800488 | 0.529520966 |
| smc202.methioninesulfoxide     | 0.013972285  | 0.022178054 | 0.529740673 |
| smc180.isoleucine              | 0.015824124  | 0.025118401 | 0.529756098 |
| c2.c10                         | 0.027305584  | 0.043343659 | 0.529757795 |
| acetylmethionine.smc240        | 0.008081562  | 0.012828424 | 0.529761502 |
| c101.pcaec422                  | -0.020028678 | 0.03179358  | 0.529770124 |
| c2.pcaec361                    | -0.005150688 | 0.008176674 | 0.529793144 |
| pcaec366.c14                   | -0.045867425 | 0.072826149 | 0.529860817 |
| smohc241.pcaec322              | -0.026452322 | 0.042008187 | 0.529943266 |
| pcaec424.taurine               | -0.042660377 | 0.067766428 | 0.530056559 |
| pcaec364.pcaec445              | 0.037906554  | 0.060222512 | 0.530108259 |
| pcaec360.pcaec445              | -0.037200248 | 0.059102443 | 0.53012247  |
| pcaec344.smc180                | -0.00778285  | 0.012367835 | 0.530212744 |
| c8.pcaec364                    | 0.014722732  | 0.023396453 | 0.530218946 |
| pcaec341.pcaec341              | -0.077484189 | 0.123141026 | 0.530245484 |
| pcaec425.c51dc                 | -0.087314545 | 0.138766684 | 0.530253932 |
| pcaec363.pcaec382              | -0.016578578 | 0.026349079 | 0.530272408 |
| glycine.pcaec363               | -0.010569725 | 0.016800829 | 0.530318618 |
| serine.pcaec364                | -0.046511959 | 0.073946723 | 0.530401133 |
| pcaec344.pcaec386              | -0.012207551 | 0.019409838 | 0.530438078 |
| asparagine.pcaec404            | -0.005515161 | 0.00877221  | 0.530586916 |
| c10.creatinine                 | 0.016705731  | 0.026582722 | 0.530759939 |
| methioninesulfoxide.pcaec385   | 0.055385033  | 0.088146235 | 0.530833069 |
| pcaec403.pcaec363              | 0.029674306  | 0.04722972  | 0.530855229 |
| asymmetricdimethylarginine.pca | 0.07444589   | 0.118526542 | 0.530987555 |
| pcaec360.serine                | 0.048373011  | 0.077019596 | 0.531009489 |
| lysopcac203.pcaec382           | 0.006002027  | 0.009556485 | 0.531011527 |
| pcaec361.pcaec362              | 0.013795678  | 0.021966447 | 0.531027093 |
| spermidine.methioninesulfoxide | -0.013156709 | 0.020949205 | 0.531030425 |
| pcaec343.c4                    | -0.00987608  | 0.015728305 | 0.531103196 |
| pcaec420.c141                  | 0.020500113  | 0.032652917 | 0.531167793 |
| pcaec281.ornithine             | 0.018440853  | 0.029376315 | 0.531215552 |
| pcaec385.pcaec405              | 0.040509866  | 0.064535481 | 0.531235787 |
| pcaec420.pcaec383              | -0.057356352 | 0.091385337 | 0.531289845 |
| smc260.smohc222                | -0.004008011 | 0.006385937 | 0.531290504 |
| smohc161.glutamicacid          | 0.025186431  | 0.040133721 | 0.531334969 |
| c102.smc181                    | -0.017449487 | 0.027805238 | 0.531336077 |
| smohc141.c2                    | -0.046884868 | 0.074711913 | 0.53134853  |
| pcaec340.isoleucine            | 0.019026245  | 0.030322939 | 0.531406155 |
| lysopcac281.pcaec444           | 0.094893644  | 0.151248526 | 0.531439969 |
| pcaec383.pcaec344              | 0.06005362   | 0.095726445 | 0.531476507 |

|                         |              |             |             |
|-------------------------|--------------|-------------|-------------|
| pcaec381.prolinr        | -0.015862994 | 0.025286998 | 0.5314948   |
| pcaec406.pcaec382       | 0.010974956  | 0.017495233 | 0.531499341 |
| pcaac426.pcaac385       | -0.019460887 | 0.031023148 | 0.531505293 |
| pcaec406.smc181         | 0.019440978  | 0.030993627 | 0.531534612 |
| pcaac401.pcaec321       | 0.034633287  | 0.05522211  | 0.531595942 |
| pcaac363.pcaac323       | -0.057635242 | 0.091925093 | 0.531715466 |
| citruline.c2            | 0.020327775  | 0.032424509 | 0.531750941 |
| glycine.pcaec444        | -0.06570686  | 0.104824677 | 0.53181629  |
| c10.pcaac404            | 0.003269607  | 0.005217027 | 0.531886803 |
| lysopcac160.smohc222    | -0.040244144 | 0.064216925 | 0.531904964 |
| lysopcac180.c0          | -0.001382945 | 0.002206829 | 0.531921002 |
| alphaaminoadipicacid.c3 | 0.030531493  | 0.048722216 | 0.531935313 |
| pcaec401.lysopcac204    | -0.026020039 | 0.041533001 | 0.532035646 |
| smohc221.pcaec445       | -0.023348309 | 0.037272394 | 0.532079478 |
| smc261.lysopcac160      | -0.020521574 | 0.032761722 | 0.532102302 |
| pcaac404.pcaec340       | 0.048508432  | 0.077456523 | 0.532182172 |
| prolinr.pcaec444        | 0.073201191  | 0.116890852 | 0.532202551 |
| lysopcac160.pcaac361    | -0.043164503 | 0.068938963 | 0.53227385  |
| pcaec445.pcaec361       | -0.006682061 | 0.010673105 | 0.532313744 |
| pcaac422.pcaec421       | 0.005707378  | 0.009116852 | 0.532340057 |
| smc160.c8               | -0.025110787 | 0.040121973 | 0.532447256 |
| lysopcac203.pcaac363    | 0.008491412  | 0.013570737 | 0.532542972 |
| glutamine.pcaec321      | -0.006417526 | 0.010257496 | 0.532590289 |
| lysopcac140.pcaac320    | -0.049363909 | 0.078911473 | 0.532643878 |
| c141oh.c18              | -0.040526138 | 0.064787416 | 0.532667279 |
| pcaec341.pcaac404       | -0.007428769 | 0.011877065 | 0.532701992 |
| pcaec363.asparticacid   | 0.02343011   | 0.037461197 | 0.532716153 |
| glutamicacid.pcaec403   | 0.028102173  | 0.044932992 | 0.532733219 |
| phenylalanine.pcaec446  | -0.079950799 | 0.127838451 | 0.532745712 |
| pcaac426.pcaec404       | 0.011482481  | 0.018360192 | 0.53274835  |
| pcaec361.c16            | 0.020626425  | 0.032981277 | 0.532750247 |
| pcaac420.pcaac384       | 0.028944723  | 0.046283822 | 0.532765622 |
| pcaec381.pcaec343       | 0.045138604  | 0.072178612 | 0.532766164 |
| pcaac385.c3             | 0.018903613  | 0.030229429 | 0.532789459 |
| smc261.c5               | -0.004533647 | 0.00725033  | 0.532812996 |
| pcaac362.pcaec340       | 0.05022834   | 0.080346221 | 0.532913326 |
| c181.pcaac420           | -0.080505573 | 0.128817218 | 0.533037018 |
| pcaec421.pcaac321       | 0.010479693  | 0.016770257 | 0.533077701 |
| c18.pcaac404            | 0.003343354  | 0.005351569 | 0.533179026 |
| pcaec446.pcaec425       | -0.008414054 | 0.013472836 | 0.533324858 |
| serotonin.pcaec361      | 0.011001153  | 0.017615782 | 0.533334297 |
| pcaec364.pcaec423       | -0.005335681 | 0.008544492 | 0.533365082 |
| pcaec421.taurine        | 0.031440009  | 0.050348898 | 0.533375314 |

|                           |              |             |             |
|---------------------------|--------------|-------------|-------------|
| pcaec361.smohc141         | -0.020096156 | 0.032184648 | 0.53340211  |
| pcaac381.pcaec321         | 0.017994445  | 0.028821171 | 0.533437295 |
| pcaec380.pcaac384         | 0.033320309  | 0.053379384 | 0.533523291 |
| pcaac384.c3               | 0.016973051  | 0.027193553 | 0.533562345 |
| pcaec341.pcaec322         | 0.042366205  | 0.067911287 | 0.533765889 |
| smc261.methionine         | 0.014367794  | 0.023031814 | 0.533780615 |
| leucine.pcaec360          | 0.006269445  | 0.010050578 | 0.533803045 |
| pcaac362.ornithine        | 0.024617629  | 0.039464879 | 0.533805551 |
| pcaec342.pcaec380         | -0.019263036 | 0.030881436 | 0.533813249 |
| creatinine.pcaec382       | -0.004808364 | 0.007708933 | 0.533835995 |
| pcaec402.creatinine       | -0.007762943 | 0.012446174 | 0.533847758 |
| c182.ornithine            | -0.015138859 | 0.024273325 | 0.533872864 |
| lysopcac203.serine        | -0.033124747 | 0.053117238 | 0.533916861 |
| pcaac322.pcaec360         | -0.003121217 | 0.005005306 | 0.533939164 |
| c51dc.glutamicacid        | 0.048549063  | 0.077856782 | 0.533947598 |
| pcaec300.pcaec384         | 0.046714182  | 0.074921036 | 0.533984679 |
| lysopcac140.pcaac322      | -0.03004901  | 0.048196503 | 0.534013212 |
| lysopcac170.pcaac365      | -0.041040051 | 0.065831626 | 0.534052067 |
| pcaac404.pcaec386         | 0.005481939  | 0.008794154 | 0.534083284 |
| pcaec322.pcaac321         | 0.023901997  | 0.038348934 | 0.534138964 |
| lysopcac140.phenylalanine | 0.023832922  | 0.038257758 | 0.534348685 |
| pcaec363.alanine          | -0.026533301 | 0.042593247 | 0.534355487 |
| c51dc.pcaac403            | 0.003628783  | 0.005825238 | 0.534358458 |
| pcaec420.smc181           | -0.009407652 | 0.015103788 | 0.534407349 |
| pcaec381.glutamicacid     | 0.062955349  | 0.101079678 | 0.534432313 |
| lysine.c102               | 0.01911508   | 0.030697482 | 0.534521981 |
| pcaac364.pcaec425         | -0.006017754 | 0.009664499 | 0.534539184 |
| pcaac406.pcaac322         | -0.04084765  | 0.065606621 | 0.534572677 |
| pcaec383.pcaac300         | -0.043097141 | 0.06922294  | 0.53459239  |
| c142.pcaec444             | -0.067715455 | 0.1088002   | 0.534724211 |
| smc260.pcaac320           | 0.049959206  | 0.080275537 | 0.534748436 |
| lysopcac281.pcaec363      | -0.016605799 | 0.026684246 | 0.534774244 |
| glycine.pcaac362          | -0.024912777 | 0.040034097 | 0.534786208 |
| pcaec363.pcaac320         | 0.051647655  | 0.083072988 | 0.535163035 |
| c0.lysine                 | -0.061280756 | 0.09857269  | 0.535184876 |
| pcaec363.pcaec444         | 0.070730267  | 0.11377263  | 0.535184881 |
| alanine.methionine        | -0.012875586 | 0.020711807 | 0.53520224  |
| c18.glutamicacid          | -0.026802301 | 0.043124858 | 0.535300427 |
| pcaac281.smc180           | -0.009781225 | 0.015738348 | 0.535310103 |
| pcaec360.pcaec362         | 0.020952458  | 0.033713611 | 0.535314213 |
| pcaec445.pcaac365         | 0.034095639  | 0.05487033  | 0.535378448 |
| pcaec360.pcaec401         | 0.054331642  | 0.08744923  | 0.535438899 |
| pcaec321.smohc141         | 0.02267948   | 0.036520912 | 0.535631564 |

|                         |              |             |             |
|-------------------------|--------------|-------------|-------------|
| smc261.pcaec422         | 0.0242224    | 0.039007631 | 0.535653971 |
| pcaec446.pcaac404       | -0.003134911 | 0.005048903 | 0.53569098  |
| asparagine.pcaec365     | 0.008727268  | 0.014055767 | 0.535695083 |
| pcaec402.smohc141       | -0.017669343 | 0.028459067 | 0.535717591 |
| lysopcac180.pcaac344    | -0.034160411 | 0.055021489 | 0.535726047 |
| smc181.glutamicacid     | 0.027199237  | 0.043810931 | 0.535741532 |
| c141oh.c16              | 0.028523511  | 0.045947101 | 0.535769072 |
| creatinine.c0           | 0.000330846  | 0.000532947 | 0.535772363 |
| smc202.pcaec422         | 0.016527397  | 0.026625018 | 0.535797509 |
| c142.pcaec386           | 0.003241226  | 0.005221983 | 0.535835596 |
| lysopcac204.isoleucine  | 0.018073692  | 0.029132539 | 0.536028182 |
| lysopcac204.pcaec420    | -0.016181262 | 0.026084694 | 0.536067449 |
| pcaac240.c5             | 0.013202286  | 0.02128427  | 0.53610145  |
| pcaec425.pcaac363       | -0.008741607 | 0.014093341 | 0.536113679 |
| pcaac421.pcaec403       | 0.019238221  | 0.03101622  | 0.536114871 |
| c51dc.c182              | 0.044599773  | 0.07190926  | 0.536141336 |
| pcaec443.pcaec444       | -0.064969676 | 0.104752448 | 0.536142558 |
| serotonin.asparagine    | -0.015169668 | 0.02446006  | 0.53616876  |
| pcaac406.smc260         | -0.020015969 | 0.032285293 | 0.53630623  |
| pcaac420.pcaec443       | -0.031860125 | 0.051391842 | 0.536323647 |
| pcaec381.pcaac322       | 0.035454346  | 0.057190462 | 0.5363306   |
| pcaac420.acetylnithoine | -0.033606172 | 0.054218749 | 0.536402118 |
| c141.citruline          | -0.047957931 | 0.077375269 | 0.536412683 |
| pcaec381.pcaec322       | -0.039806498 | 0.064227795 | 0.536438265 |
| c4.c8                   | -0.029321798 | 0.047321787 | 0.536533358 |
| pcaac320.pcaec322       | 0.048531489  | 0.078336185 | 0.536597297 |
| creatinine.isoleucine   | -0.016981389 | 0.027410964 | 0.536608816 |
| c18.c51dc               | 0.062336156  | 0.100626559 | 0.536628962 |
| pcaec403.pcaac240       | -0.015028818 | 0.024268676 | 0.536768199 |
| citruline.pcaac421      | 0.014364602  | 0.023200932 | 0.536852986 |
| pcaac360.pcaec365       | -0.018035645 | 0.029130897 | 0.536862676 |
| c142.serine             | 0.011127257  | 0.017973119 | 0.536874975 |
| arginine.asparagine     | -0.006161873 | 0.009954063 | 0.536923993 |
| c10.smohc241            | -0.05319315  | 0.085948783 | 0.537014196 |
| pcaec381.pcaec446       | 0.062402626  | 0.10083345  | 0.5370308   |
| serotonin.c142          | -0.030616734 | 0.049481738 | 0.537109731 |
| pcaac361.pcaec321       | -0.011662638 | 0.018854578 | 0.537235079 |
| pcaec321.pcaac281       | 0.001604702  | 0.002594266 | 0.537235219 |
| smc241.pcaac300         | -0.039638271 | 0.06408978  | 0.53728566  |
| smohc221.c141oh         | -0.0637735   | 0.103170346 | 0.537510706 |
| prolinr.pcaac425        | -0.050405816 | 0.081549569 | 0.537535388 |
| smc261.pcaec421         | 0.001736355  | 0.002809444 | 0.537573593 |
| smc180.glutamicacid     | 0.020149932  | 0.032613441 | 0.537705607 |

|                               |              |             |             |
|-------------------------------|--------------|-------------|-------------|
| smc261.smc161                 | 0.049533975  | 0.080190526 | 0.537796166 |
| smohc161.lysopcac160          | -0.018353959 | 0.029726571 | 0.53797862  |
| pcaec384.pcaec401             | 0.033379732  | 0.054072243 | 0.538050111 |
| pcaec363.pcaac422             | -0.012807189 | 0.020751325 | 0.538144013 |
| pcaec321.asparticacid         | -0.028741518 | 0.046593587 | 0.538353704 |
| pcaac364.c3                   | 0.018082073  | 0.029313809 | 0.538360789 |
| kynurenine.c0                 | 0.000547188  | 0.000887109 | 0.538375749 |
| asymmetricdimethylarginine.c3 | -0.03280481  | 0.053193895 | 0.53845442  |
| pcaac320.pcaec403             | -0.049114251 | 0.079644792 | 0.53847832  |
| creatinine.c4                 | -0.023731507 | 0.038484002 | 0.538483048 |
| acetylmethionine.pcaec444     | 0.055698175  | 0.090325018 | 0.538494419 |
| serine.pcaac402               | -0.019889556 | 0.032259384 | 0.538554088 |
| smc240.c182                   | 0.032145807  | 0.052141258 | 0.538578551 |
| serotonin.pcaec403            | 0.052674091  | 0.085449983 | 0.538632486 |
| pcaac364.c18                  | 0.030621167  | 0.049678435 | 0.538661659 |
| pcaec340.leucine              | -0.006049978 | 0.00981589  | 0.538689434 |
| pcaac364.c141                 | -0.02684224  | 0.043552395 | 0.538705662 |
| pcaec403.pcaec386             | 0.007976067  | 0.012941825 | 0.538718198 |
| c8.smc180                     | 0.011236421  | 0.018232416 | 0.538727056 |
| c16.acetylmethionine          | -0.035631224 | 0.057819346 | 0.538751536 |
| pcaac362.pcaec402             | -0.014352477 | 0.023294102 | 0.538823129 |
| smc202.pcaec364               | -0.016921772 | 0.027465652 | 0.538846422 |
| pcaec403.asparticacid         | -0.051963885 | 0.084353252 | 0.538898828 |
| smohc222.pcaec444             | -0.072628596 | 0.117912659 | 0.538947894 |
| pcaac406.pcaec421             | 0.001772362  | 0.002877966 | 0.539022801 |
| pcaec444.glutamicacid         | 0.040592724  | 0.065943504 | 0.539200818 |
| pcaec301.smc160               | 0.036771054  | 0.059737653 | 0.539217845 |
| pcaec423.isoleucine           | 0.015394656  | 0.025012681 | 0.539262796 |
| pcaac300.pcaac364             | -0.04594933  | 0.074661392 | 0.539287644 |
| pcaec300.pcaac426             | 0.052103777  | 0.084677853 | 0.539365755 |
| lysopcac180.pcaec381          | -0.034439668 | 0.055972727 | 0.539381491 |
| pcaec423.pcaac384             | 0.026471549  | 0.043025631 | 0.53940984  |
| pcaec423.c141oh               | -0.064260768 | 0.104457606 | 0.539452983 |
| smohc222.pcaac424             | -0.011694725 | 0.019014194 | 0.53954039  |
| pcaec403.pcaac420             | 0.061973419  | 0.10077016  | 0.539576393 |
| lysopcac203.pcaac422          | -0.047150887 | 0.076673562 | 0.539603691 |
| smc240.pcaec341               | 0.032407454  | 0.052702207 | 0.539629904 |
| pcaec381.c2                   | 0.088667913  | 0.14419877  | 0.53964033  |
| c2.pcaac380                   | -0.022693515 | 0.036906114 | 0.539641713 |
| lysopcac181.creatinine        | -0.00373256  | 0.006071893 | 0.539754353 |
| arginine.lysopcac160          | -0.008964991 | 0.014584833 | 0.539786243 |
| pcaac361.c8                   | -0.023187878 | 0.037723711 | 0.539787935 |
| prolinr.methioninesulfoxide   | -0.016831423 | 0.027385951 | 0.539837878 |

|                                |              |             |             |
|--------------------------------|--------------|-------------|-------------|
| pcaac422.pcaac426              | -0.052938626 | 0.086146474 | 0.539891803 |
| pcaec364.pcaac343              | -0.012584932 | 0.020483756 | 0.539979304 |
| asymmetricdimethylarginine.pca | -0.033942617 | 0.055257016 | 0.540056988 |
| pcaec404.pcaec301              | 0.040143181  | 0.065352993 | 0.540067794 |
| c14.pcaac323                   | -0.044420087 | 0.072322594 | 0.540105895 |
| spermidine.isoleucine          | 0.059274499  | 0.096509469 | 0.540112827 |
| pcaec341.pcaec380              | -0.024168769 | 0.039355883 | 0.54016229  |
| lysopcac180.methioninesulfoxid | 0.032364194  | 0.052701738 | 0.540166968 |
| asparagine.pcaac320            | -0.013756015 | 0.022400839 | 0.540177685 |
| lysopcac181.pcaac383           | 0.007756805  | 0.012634163 | 0.540263336 |
| pcaec402.c16                   | 0.014912553  | 0.024295837 | 0.540371619 |
| pcaec365.threonine             | -0.031279098 | 0.050960882 | 0.540374272 |
| pcaac383.smc180                | -0.008461629 | 0.013787213 | 0.54041135  |
| lysopcac203.pcaac406           | -0.045562414 | 0.07423883  | 0.540413094 |
| pcaac403.smohc141              | -0.013682587 | 0.022296246 | 0.540449536 |
| smc241.pcaac344                | 0.055776762  | 0.090891488 | 0.540455483 |
| smohc141.pcaec343              | -0.038921179 | 0.063426482 | 0.540469189 |
| c18.acetylmithoine             | -0.027575941 | 0.04494163  | 0.5405007   |
| pcaec362.pcaac364              | -0.029816468 | 0.048602315 | 0.540577304 |
| c14.c5                         | -0.002950575 | 0.004809931 | 0.540606544 |
| lysopcac281.pcaec385           | -0.03194785  | 0.052080552 | 0.540608207 |
| smc240.c51dc                   | -0.071888632 | 0.117262414 | 0.540854553 |
| serine.creatinine              | -0.014059388 | 0.022933988 | 0.540868114 |
| pcaec402.pcaac323              | -0.051346286 | 0.083763004 | 0.540896055 |
| lysopcac180.pcaec422           | 0.025853799  | 0.042188321 | 0.541012059 |
| pcaec343.pcaec420              | -0.016025427 | 0.026156545 | 0.54110778  |
| pcaec383.pcaac361              | 0.034300948  | 0.055998113 | 0.541197549 |
| pcaec341.pcaac385              | -0.019789741 | 0.032319486 | 0.541343618 |
| lysopcac140.pcaec343           | 0.078963739  | 0.128960708 | 0.541348609 |
| lysopcac161.creatinine         | -0.003270601 | 0.005342708 | 0.541445462 |
| pcaac361.lysine                | 0.046297174  | 0.075643736 | 0.54152414  |
| pcaac422.tyrosine              | -0.035055533 | 0.057278171 | 0.541537221 |
| lysopcac204.pcaac402           | 0.016181093  | 0.02644276  | 0.541598916 |
| c0.putrescine                  | -0.020862501 | 0.034094182 | 0.541612832 |
| smc181.pcaec363                | -0.013759313 | 0.022487422 | 0.541639818 |
| smc260.pcaac380                | 0.01557192   | 0.025455011 | 0.541721766 |
| glycine.c8                     | 0.024621008  | 0.040248053 | 0.541729136 |
| phenylalanine.creatinine       | -0.011946918 | 0.019532426 | 0.541786063 |
| c141oh.pcaec322                | 0.026494183  | 0.043324376 | 0.541861779 |
| glycine.c16                    | 0.029217382  | 0.047786526 | 0.541938322 |
| pcaac365.pcaec341              | -0.072691366 | 0.11891013  | 0.542005085 |
| pcaac364.pcaec363              | -0.021549957 | 0.035252625 | 0.542013474 |
| arginine.lysine                | 0.069949138  | 0.114429204 | 0.542022259 |

|                           |              |             |             |
|---------------------------|--------------|-------------|-------------|
| pcaec382.acetylmethionine | 0.060135282  | 0.098410293 | 0.542167773 |
| pcaac426.pcaac365         | -0.040081962 | 0.065599951 | 0.542208051 |
| pcaac341.c4               | -0.017864758 | 0.029244604 | 0.542295402 |
| pcaec321.smc181           | 0.036973229  | 0.060528035 | 0.542314514 |
| pcaec405.isoleucine       | 0.011469198  | 0.018776973 | 0.542336183 |
| pcaec341.pcaec383         | -0.042233785 | 0.069144716 | 0.542342185 |
| pcaac383.pcaec421         | 0.001009696  | 0.001653074 | 0.542344591 |
| c14.lysopcac170           | -0.022428924 | 0.036721568 | 0.542354982 |
| pcaac366.c0               | 0.000765071  | 0.00125274  | 0.542398193 |
| pcaec405.c51dc            | -0.090418282 | 0.14806616  | 0.542435551 |
| asparagine.pcaac322       | -0.034906445 | 0.057168651 | 0.542484532 |
| leucine.tyrosine          | 0.054758081  | 0.089681753 | 0.542487821 |
| c101.histidine            | -0.029295535 | 0.047980822 | 0.54249746  |
| c142.acetylmethionine     | -0.017940474 | 0.029395613 | 0.542666714 |
| pcaec300.c5               | 0.005381753  | 0.008818111 | 0.542669665 |
| pcaac366.pcaac323         | 0.028572438  | 0.046824254 | 0.542736266 |
| pcaec343.c51dc            | -0.086308386 | 0.141446989 | 0.542752174 |
| methionine.asparticacid   | 0.02966631   | 0.04863944  | 0.54292318  |
| pcaac424.valine           | -0.024675448 | 0.040458877 | 0.542945216 |
| c51dc.putrescine          | -0.031600748 | 0.051829582 | 0.543067234 |
| spermidine.c0             | -0.002785314 | 0.004568506 | 0.543085457 |
| lysopcac160.c101          | -0.011743996 | 0.019263134 | 0.543095731 |
| isoleucine.pcaac420       | 0.041571986  | 0.068195668 | 0.543137411 |
| pcaac360.pcaac363         | -0.014490115 | 0.023771289 | 0.543160503 |
| pcaec362.pcaac360         | 0.027477631  | 0.045092218 | 0.543291598 |
| lysopcac280.c5            | 0.010607827  | 0.017408099 | 0.543294003 |
| lysopcac281.creatinine    | -0.004092712 | 0.006716451 | 0.543297514 |
| c4.lysopcac170            | -0.023064753 | 0.037855368 | 0.543343856 |
| glutamine.smc260          | -0.019257452 | 0.031607065 | 0.543350052 |
| c141.leucine              | -0.003543505 | 0.005816548 | 0.543393584 |
| creatinine.pcaac402       | 0.015502234  | 0.025447804 | 0.543415559 |
| pcaec444.pcaac384         | 0.041815981  | 0.068653189 | 0.543473404 |
| pcaec444.smohc161         | 0.006952964  | 0.011415431 | 0.543477012 |
| prolinr.c51               | 0.019622092  | 0.032216578 | 0.543487925 |
| c16.smc261                | 0.009997565  | 0.016414871 | 0.543496391 |
| pcaac425.c162             | -0.043493672 | 0.071418775 | 0.543536333 |
| pcaec383.glutamicacid     | 0.066209897  | 0.108723392 | 0.543549079 |
| pcaec363.c8               | -0.024919492 | 0.040920677 | 0.543552361 |
| pcaac281.pcaac321         | -0.016640773 | 0.027333791 | 0.543666098 |
| pcaac363.smc241           | -0.049206985 | 0.0808418   | 0.543742861 |
| pcaac380.ornithine        | 0.012662696  | 0.020805297 | 0.543778544 |
| c8.pcaec446               | -0.046575434 | 0.076530389 | 0.543805665 |
| pcaec342.acetylmethionine | 0.013828797  | 0.022725731 | 0.543857948 |



|                              |              |             |             |
|------------------------------|--------------|-------------|-------------|
| pcaac321.lysopcac204         | -0.007838075 | 0.01288143  | 0.543877619 |
| smc160.creatinine            | -0.004669766 | 0.007674957 | 0.543901788 |
| pcaec406.lysopcac161         | 0.069223613  | 0.113794498 | 0.543981642 |
| lysopcac140.c142             | 0.036781267  | 0.060471513 | 0.544034572 |
| c12.serine                   | 0.0120175    | 0.019762616 | 0.544132861 |
| pcaec382.pcaec384            | -0.028228966 | 0.046438802 | 0.544277035 |
| smohc222.pcaac386            | 0.007490947  | 0.012323667 | 0.544292976 |
| pcaec423.pcaec340            | 0.042171719  | 0.069424218 | 0.544558061 |
| pcaac404.lysine              | 0.051570848  | 0.084909203 | 0.544614318 |
| pcaec361.pcaec385            | -0.038221667 | 0.062936117 | 0.544651165 |
| pcaec423.smohc161            | 0.006609182  | 0.010882957 | 0.544659372 |
| serotonin.lysopcac160        | -0.008928794 | 0.01470386  | 0.544695808 |
| pcaac401.pcaac321            | 0.00812159   | 0.013374594 | 0.544696713 |
| pcaac362.threonine           | -0.01954796  | 0.032197008 | 0.544765641 |
| c141.histidine               | -0.030753389 | 0.050662631 | 0.544840277 |
| pcaac384.methionine          | -0.012530876 | 0.020648262 | 0.544939501 |
| pcaac403.valine              | -0.01798433  | 0.029645916 | 0.545095351 |
| phenylalanine.pcaac361       | 0.03919269   | 0.064608381 | 0.545107529 |
| c12.pcaec423                 | 0.025715645  | 0.042392564 | 0.545115368 |
| asparticacid.c102            | 0.032453053  | 0.053499719 | 0.545118759 |
| smc240.pcaec386              | 0.007777355  | 0.012821509 | 0.5451292   |
| lysopcac161.c2               | -0.053723028 | 0.088568188 | 0.545138487 |
| ornithine.c2                 | 0.038302023  | 0.063153637 | 0.545193371 |
| c102.smc260                  | -0.025235056 | 0.041614913 | 0.545256297 |
| pcaac365.serotonin           | -0.076755906 | 0.126603699 | 0.545339349 |
| lysopcac280.pcaec401         | 0.024542146  | 0.040490812 | 0.545440405 |
| pcaac363.glutamicacid        | 0.029971774  | 0.049453816 | 0.545480514 |
| pcaec341.smc181              | -0.017492463 | 0.028863417 | 0.545489224 |
| pcaac362.pcaac321            | -0.01753059  | 0.028945149 | 0.545750165 |
| pcaac363.spermidine          | -0.042898314 | 0.070832315 | 0.545761187 |
| pcaac380.smc180              | -0.013838954 | 0.02285056  | 0.545763364 |
| pcaac240.pcaac425            | 0.107399552  | 0.177340504 | 0.545774358 |
| methioninesulfoxide.pcaac364 | 0.083079758  | 0.137200915 | 0.545826362 |
| smohc241.c141oh              | -0.069081188 | 0.114153568 | 0.546073714 |
| smc181.pcaac363              | -0.003655739 | 0.006041608 | 0.546117683 |
| smc202.pcaac422              | -0.035232922 | 0.058227635 | 0.546120596 |
| smc240.pcaec445              | 0.064028384  | 0.105829948 | 0.54617187  |
| smohc241.alanine             | -0.014080562 | 0.023277264 | 0.546241935 |
| smc180.creatinine            | -0.005992742 | 0.009907518 | 0.546267164 |
| pcaec362.c141                | 0.014572762  | 0.024093582 | 0.546285805 |
| lysopcac204.c141             | 0.021152687  | 0.034974472 | 0.5463099   |
| pcaac240.glycine             | 0.021893571  | 0.036205148 | 0.546372748 |
| pcaac322.pcaac323            | 0.031325179  | 0.051805059 | 0.546395706 |

|                                 |              |             |             |
|---------------------------------|--------------|-------------|-------------|
| pcaec385.lysine                 | 0.051627459  | 0.085403609 | 0.546503518 |
| lysopcac180.pcaac360            | 0.019258148  | 0.031865458 | 0.546605126 |
| c18.c5                          | -0.009654528 | 0.015977946 | 0.546682844 |
| pcaec380.methioninesulfoxide    | 0.010907357  | 0.01806145  | 0.546907061 |
| pcaec444.threonine              | -0.016304214 | 0.026998127 | 0.546907704 |
| c14.transhydroxyproline         | 0.01412419   | 0.023391605 | 0.546965492 |
| smc240.pcaec403                 | -0.022920592 | 0.037964508 | 0.54701662  |
| histidine.pcaac365              | 0.037033548  | 0.061346603 | 0.547056487 |
| smc160.pcaec445                 | -0.029016949 | 0.048071225 | 0.547091736 |
| pcaec423.pcaec401               | 0.036204358  | 0.059979865 | 0.54710205  |
| pcaec340.alphaaminoadipicacid   | -0.018896423 | 0.031306381 | 0.547109994 |
| c3.lysopcac182                  | -0.037284255 | 0.061772381 | 0.547124383 |
| pcaac360.smc161                 | 0.077605691  | 0.12861065  | 0.547229885 |
| pcaac380.pcaac385               | -0.022233092 | 0.036851254 | 0.5472935   |
| pcaac401.pcaac405               | -0.047525216 | 0.078789706 | 0.547379145 |
| serotonin.lysopcac181           | 0.028711119  | 0.047600936 | 0.547397566 |
| smc202.spermidine               | 0.042364749  | 0.070244275 | 0.547435257 |
| alanine.putrescine              | 0.024250643  | 0.040214909 | 0.547488253 |
| lysopcac161.pcaec406            | -0.020053303 | 0.03327322  | 0.547713936 |
| c2.pcaac322                     | -0.035754354 | 0.059327811 | 0.547732789 |
| c162.pcaec380                   | -0.038040405 | 0.063125013 | 0.547757609 |
| pcaec321.smc240                 | -0.017790629 | 0.029522304 | 0.547759992 |
| smohc221.pcaac363               | -0.005143045 | 0.008534702 | 0.547768354 |
| glutamicacid.methioninesulfoxid | 0.022543471  | 0.037413402 | 0.547803691 |
| pcaac343.lysopcac181            | 0.019898208  | 0.033034692 | 0.547941662 |
| pcaac240.pcaac320               | 0.071555171  | 0.118799222 | 0.547956633 |
| smohc222.pcaac385               | -0.012989536 | 0.021567514 | 0.547987822 |
| smc161.methioninesulfoxide      | 0.005892535  | 0.009785382 | 0.548051451 |
| smc180.asymmetricdimethylargi   | -0.012241453 | 0.020328931 | 0.548056939 |
| smc260.pcaac322                 | -0.018338614 | 0.030456778 | 0.548089944 |
| c101.kynurenine                 | 0.003341967  | 0.005550997 | 0.548137193 |
| asparticacid.c8                 | 0.045510698  | 0.075609559 | 0.548224062 |
| smohc241.transhydroxyproline    | 0.017917439  | 0.029768686 | 0.548242929 |
| pcaac381.smc161                 | 0.064094349  | 0.10649227  | 0.548256379 |
| pcaec343.pcaec445               | -0.033871555 | 0.056277425 | 0.548257053 |
| pcaac422.pcaec386               | 0.012005133  | 0.019948224 | 0.548292179 |
| pcaac401.pcaec424               | 0.033894969  | 0.056321786 | 0.548295772 |
| pcaec383.pcaac406               | -0.044908508 | 0.074642959 | 0.548405269 |
| pcaec384.pcaec363               | 0.021216326  | 0.035265015 | 0.54841784  |
| prolinr.taurine                 | -0.020525862 | 0.034118995 | 0.548437104 |
| smc260.leucine                  | -0.00380634  | 0.006329251 | 0.548574933 |
| c3.c141                         | 0.031469334  | 0.052328214 | 0.54857828  |
| lysopcac181.pcaec445            | -0.036130894 | 0.060083593 | 0.548604774 |

|                          |              |             |             |
|--------------------------|--------------|-------------|-------------|
| c3.valine                | 0.048389169  | 0.080473385 | 0.548629527 |
| pcaac421.spermidine      | -0.041564074 | 0.069124441 | 0.548638181 |
| lysopcac203.pcaec403     | -0.042330572 | 0.070409725 | 0.548697924 |
| pcaac420.pcaec301        | 0.0436457    | 0.072601885 | 0.548723591 |
| c182.pcaac426            | 0.033587008  | 0.055879572 | 0.548792823 |
| smohc241.creatinine      | -0.005839745 | 0.009716379 | 0.548819344 |
| c3.asparagine            | 0.007496114  | 0.012472312 | 0.548819517 |
| pcaac425.pcaac420        | 0.092452243  | 0.153860146 | 0.548909476 |
| pcaac421.phenylalanine   | 0.028037319  | 0.046662009 | 0.548926261 |
| pcaac421.smohc241        | 0.048725922  | 0.0811201   | 0.549056237 |
| pcaec423.c3              | -0.021014404 | 0.034987287 | 0.549078987 |
| pcaec340.lysopcac170     | 0.009726039  | 0.016194108 | 0.549104557 |
| lysopcac204.tyrosine     | -0.027396629 | 0.045619032 | 0.549130206 |
| lysopcac281.pcaac240     | -0.009505387 | 0.015831894 | 0.549235036 |
| pcaac343.h1              | 0.000958034  | 0.001595749 | 0.549253878 |
| pcaec445.pcaac404        | -0.003678923 | 0.006128387 | 0.549292337 |
| smc260.pcaac383          | 0.003231244  | 0.005383114 | 0.549327634 |
| smohc241.pcaac384        | 0.040698852  | 0.067819738 | 0.549428692 |
| pcaac425.pcaec365        | 0.022222853  | 0.03703694  | 0.549485015 |
| pcaec445.pcaac281        | 0.005570756  | 0.009290032 | 0.549730792 |
| asparticacid.serine      | 0.017797     | 0.029679368 | 0.549735191 |
| pcaac360.c18             | 0.031548925  | 0.052619412 | 0.549784361 |
| kynurenine.pcaac363      | 0.00508434   | 0.008483609 | 0.549953756 |
| c141oh.c141              | 0.025209314  | 0.042065416 | 0.54997038  |
| pcaac422.h1              | 0.00177557   | 0.002962921 | 0.549987115 |
| pcaac342.methionine      | -0.02285507  | 0.038146992 | 0.550074554 |
| methioninesulfoxide.c182 | -0.050240182 | 0.083872089 | 0.550155741 |
| pcaac320.pcaec364        | -0.009414539 | 0.015717301 | 0.550167379 |
| smc240.smc202            | -0.030204529 | 0.050460835 | 0.550445574 |
| pcaac300.c0              | 0.00028562   | 0.000477187 | 0.550461179 |
| pcaac425.asparagine      | -0.008784159 | 0.01467722  | 0.550501729 |
| pcaac405.pcaac365        | -0.03103328  | 0.051876471 | 0.550684212 |
| c5.c0                    | -0.001120847 | 0.001873922 | 0.550741437 |
| pcaac403.isoleucine      | 0.013147399  | 0.021981506 | 0.550752811 |
| lysopcac180.pcaac363     | -0.010776895 | 0.018018682 | 0.5507636   |
| pcaec364.asparagine      | 0.006468853  | 0.010815828 | 0.55076646  |
| lysopcac204.pcaec361     | 0.002528386  | 0.00422755  | 0.55077815  |
| pcaac404.pcaec341        | 0.043893184  | 0.073399636 | 0.550825383 |
| pcaec386.pcaac406        | -0.045738353 | 0.076486197 | 0.550830621 |
| pcaec384.asparticacid    | 0.02998857   | 0.050159704 | 0.550919176 |
| pcaac421.c141            | 0.019777551  | 0.033083519 | 0.550955795 |
| pcaec445.lysopcac161     | -0.043399969 | 0.072602954 | 0.550979314 |
| pcaec404.pcaec384        | -0.029287056 | 0.048994018 | 0.550981574 |

|                                 |              |             |             |
|---------------------------------|--------------|-------------|-------------|
| pcaec383.pcaec386               | 0.005976404  | 0.009998764 | 0.551017344 |
| pcaac322.pcaec386               | 0.00569165   | 0.009522869 | 0.551038601 |
| pcaec401.pcaac402               | 0.041896654  | 0.070102434 | 0.551060719 |
| c181.tyrosine                   | -0.045566787 | 0.076259788 | 0.551146276 |
| glutamine.methioninesulfoxide   | -0.011399326 | 0.019087042 | 0.551340583 |
| pcaac240.lysopcac204            | -0.022875461 | 0.03830347  | 0.55134866  |
| smc181.pcaac320                 | 0.030453314  | 0.051005781 | 0.551455356 |
| pcaec386.pcaac381               | 0.026288156  | 0.044031873 | 0.551475678 |
| pcaec300.c141                   | 0.017460379  | 0.029246437 | 0.551486887 |
| pcaac365.c102                   | 0.024341718  | 0.04077529  | 0.551511177 |
| pcaec380.isoleucine             | 0.016540426  | 0.027710405 | 0.551557262 |
| c12.c16                         | -0.021445496 | 0.03592797  | 0.551557622 |
| asymmetricdimethylarginine.lysc | 0.034842173  | 0.058374733 | 0.551578756 |
| lysopcac140.smc261              | -0.019907879 | 0.033356068 | 0.551606361 |
| pcaac361.smc261                 | 0.049336201  | 0.082666761 | 0.551620419 |
| smohc222.pcaec382               | -0.01453726  | 0.024362804 | 0.55169316  |
| c142.pcaac424                   | 0.00463045   | 0.007763789 | 0.551881389 |
| lysopcac281.methionine          | -0.024942643 | 0.041826136 | 0.551931464 |
| methionine.c182                 | 0.037106519  | 0.062236103 | 0.552010939 |
| phenylalanine.pcaec386          | 0.004249106  | 0.007127563 | 0.552057875 |
| pcaec301.c10                    | -0.022593382 | 0.037899263 | 0.552063372 |
| pcaec443.lysopcac182            | 0.044592065  | 0.074810857 | 0.552115957 |
| pcaec380.pcaac404               | -0.006059201 | 0.010168576 | 0.55224182  |
| ornithine.acetylnithoine        | -0.01679438  | 0.028189372 | 0.552311904 |
| lysopcac140.pcaac422            | -0.050760439 | 0.085207346 | 0.552339552 |
| pcaec384.pcaac281               | -0.001296672 | 0.002176797 | 0.552372506 |
| pcaac422.pcaac363               | -0.015415859 | 0.0258847   | 0.552452618 |
| smc240.c18                      | 0.018772616  | 0.031524888 | 0.552501373 |
| pcaec380.h1                     | 0.001273658  | 0.002139037 | 0.552535035 |
| c5.c4                           | 0.033989228  | 0.05709181  | 0.552596155 |
| pcaec405.phenylalanine          | 0.029340406  | 0.049283756 | 0.552600881 |
| smc241.pcaec422                 | 0.025373369  | 0.042623955 | 0.552635523 |
| pcaac422.pcaac385               | 0.03399607   | 0.057113797 | 0.55266905  |
| lysopcac180.pcaac384            | 0.049402942  | 0.083006076 | 0.552709934 |
| pcaec443.pcaec340               | -0.034970631 | 0.058767655 | 0.552781004 |
| smc240.acetylnithoine           | -0.029048573 | 0.048824536 | 0.552852625 |
| pcaec362.smc160                 | 0.079931999  | 0.134352275 | 0.552862687 |
| pcaec341.pcaec363               | 0.033695349  | 0.056640174 | 0.552890326 |
| pcaec446.lysine                 | 0.054798589  | 0.092117641 | 0.552907506 |
| smohc241.smohc222               | -0.003068242 | 0.005158974 | 0.55299913  |
| pcaac364.pcaec380               | 0.039882773  | 0.067059925 | 0.553002708 |
| putrescine.pcaec365             | -0.013292407 | 0.022350824 | 0.553013847 |
| pcaac281.lysopcac204            | -0.01349212  | 0.022696729 | 0.553190152 |

|                              |              |             |             |
|------------------------------|--------------|-------------|-------------|
| pcaec422.c14                 | 0.065855383  | 0.110811134 | 0.553289657 |
| c102.acetylmithoine          | 0.006185681  | 0.010408409 | 0.553293951 |
| pcaac403.pcaac323            | -0.07534413  | 0.126787846 | 0.553322583 |
| pcaec380.pcaac321            | 0.014809437  | 0.024926801 | 0.553413614 |
| pcaac300.pcaec420            | 0.032826494  | 0.055258355 | 0.553455098 |
| smc160.c0                    | 0.000266711  | 0.000448988 | 0.553473671 |
| pcaac344.lysopcac181         | 0.024504515  | 0.041254944 | 0.553506588 |
| lysopcac181.acetylmithoine   | -0.022286238 | 0.037524076 | 0.55354612  |
| lysine.pcaec342              | -0.071857837 | 0.120991172 | 0.553551866 |
| smc240.pcaec446              | -0.017198862 | 0.028962097 | 0.553598148 |
| pcaec360.pcaec385            | -0.03844766  | 0.064747788 | 0.553620712 |
| pcaec322.c0                  | 0.000410483  | 0.000691298 | 0.55363429  |
| glutamine.pcaec422           | -0.023374737 | 0.039373671 | 0.553715683 |
| pcaec445.lysopcac204         | -0.010467059 | 0.017637235 | 0.553849397 |
| pcaec424.smc260              | 0.022812963  | 0.038444179 | 0.553888642 |
| pcaac403.spermidine          | 0.039813851  | 0.067120496 | 0.554045493 |
| pcaec322.pcaac385            | -0.014739918 | 0.024855754 | 0.554146542 |
| arginine.pcaec421            | -0.006941976 | 0.01170761  | 0.554195101 |
| smc181.pcaac421              | -0.028105166 | 0.047400934 | 0.554209295 |
| serotonin.pcaec365           | -0.020409896 | 0.034425335 | 0.55424268  |
| pcaec385.ornithine           | 0.019578046  | 0.033024371 | 0.554268042 |
| asparagine.pcaec446          | 0.054811816  | 0.092477712 | 0.554357015 |
| c10.smc180                   | 0.010468173  | 0.017662235 | 0.554367821 |
| pcaac321.pcaac364            | -0.051125025 | 0.086287324 | 0.55449416  |
| lysopcac180.c5               | -0.009360572 | 0.015800307 | 0.554539381 |
| c142.smc240                  | 0.025605846  | 0.043228265 | 0.554599058 |
| glutamicacid.smc261          | -0.024070867 | 0.040637973 | 0.554609647 |
| smc160.pcaac422              | -0.013733865 | 0.023189264 | 0.554658718 |
| histidine.pcaec422           | -0.030166241 | 0.050935204 | 0.554661138 |
| pcaec342.c8                  | -0.028856445 | 0.048745575 | 0.554839122 |
| asparticacid.pcaec363        | 0.022664009  | 0.038290943 | 0.554900046 |
| pcaec420.pcaac281            | 0.001023367  | 0.001729132 | 0.554934037 |
| c0.prolinr                   | 0.009690216  | 0.016374141 | 0.554959896 |
| pcaec340.smc181              | 0.023809425  | 0.040235896 | 0.554995999 |
| pcaac422.c141                | 0.028902213  | 0.048849705 | 0.55505612  |
| alanine.glycine              | -0.028377117 | 0.047965599 | 0.555084104 |
| c141oh.methioninesulfoxide   | 0.012808497  | 0.021654657 | 0.555167367 |
| smohc161.methioninesulfoxide | 0.007801058  | 0.01319127  | 0.555240127 |
| prolinr.smc260               | 0.012928939  | 0.021863918 | 0.555269217 |
| pcaec421.c14                 | 0.056439488  | 0.095452966 | 0.555306749 |
| smc202.pcaac385              | -0.016569302 | 0.028022756 | 0.555306991 |
| smohc221.pcaec422            | 0.026323804  | 0.044521254 | 0.555318005 |
| pcaac344.pcaec420            | -0.022172464 | 0.037507988 | 0.555400832 |

|                                 |              |             |             |
|---------------------------------|--------------|-------------|-------------|
| asymmetricdimethylarginine.taur | 0.026372082  | 0.044615052 | 0.555425538 |
| pcaec301.methioninesulfoxide    | -0.008430406 | 0.0142652   | 0.555509503 |
| pcaac401.pcaac406               | -0.032385277 | 0.054803208 | 0.555535886 |
| kynurenine.pcaec420             | 0.036389484  | 0.061586071 | 0.555579744 |
| pcaec404.h1                     | 0.001629184  | 0.002757297 | 0.555585794 |
| leucine.pcaec421                | 0.000616804  | 0.001044096 | 0.555658378 |
| glutamicacid.pcaac361           | 0.036424123  | 0.06165735  | 0.555660776 |
| pcaec424.glutamicacid           | 0.050394681  | 0.085314016 | 0.555697076 |
| prolinr.methionine              | -0.013066773 | 0.02212286  | 0.55573091  |
| pcaac343.pcaec364               | -0.00632792  | 0.010719636 | 0.55595456  |
| glutamine.pcaac365              | 0.036552859  | 0.061929264 | 0.556004998 |
| pcaac323.pcaac401               | 0.018565211  | 0.031456697 | 0.556040133 |
| lysopcac281.taurine             | 0.021716988  | 0.036798514 | 0.556055985 |
| lysine.pcaac341                 | -0.00243211  | 0.00412203  | 0.556144222 |
| pcaec340.serine                 | -0.021078566 | 0.035728667 | 0.556187729 |
| isoleucine.pcaac383             | -0.007121505 | 0.012072494 | 0.556232684 |
| lysopcac180.pcaac404            | -0.003134264 | 0.005313788 | 0.556272123 |
| h1.pcaec301                     | -0.057390154 | 0.097303287 | 0.556291586 |
| glycine.pcaac343                | -0.01561085  | 0.026469637 | 0.556320003 |
| pcaec446.pcaec342               | 0.057450933  | 0.097418054 | 0.556339021 |
| lysine.tyrosine                 | -0.026424841 | 0.044811628 | 0.556371682 |
| pcaec404.pcaec383               | -0.187235687 | 0.317585856 | 0.556457181 |
| acetylmithoine.glutamicacid     | 0.042509747  | 0.072154506 | 0.556731627 |
| pcaac342.lysopcac161            | 0.043907138  | 0.074531666 | 0.556759542 |
| pcaec425.pcaac240               | -0.01228944  | 0.02086199  | 0.556775828 |
| acetylmithoine.pcaec445         | -0.035299973 | 0.059924457 | 0.556781345 |
| c12.pcaec420                    | -0.010606487 | 0.018008083 | 0.556841413 |
| ornithine.pcaac360              | -0.029508528 | 0.050105564 | 0.556879929 |
| smc261.pcaac344                 | -0.049109568 | 0.083393926 | 0.556907054 |
| methionine.pcaec386             | 0.002628081  | 0.004463225 | 0.556944857 |
| pcaac341.pcaec360               | -0.003357844 | 0.005702905 | 0.556968172 |
| pcaac364.pcaec321               | -0.015410741 | 0.02617854  | 0.557046365 |
| c4.pcaec383                     | 0.041646304  | 0.070754903 | 0.557099113 |
| acetylmithoine.pcaac365         | 0.029111366  | 0.04946064  | 0.557114583 |
| smohc141.pcaac404               | -0.003668287 | 0.006232676 | 0.557127345 |
| glutamine.c102                  | 0.025551627  | 0.043421064 | 0.557191435 |
| pcaec365.lysopcac280            | -0.005268108 | 0.008953569 | 0.557245512 |
| pcaec322.creatinine             | -0.004511312 | 0.007667368 | 0.55724726  |
| pcaac381.serotonin              | -0.04585385  | 0.077932844 | 0.557248387 |
| acetylmithoine.pcaac384         | 0.034869168  | 0.059267782 | 0.557277733 |
| lysopcac203.c10                 | -0.003390912 | 0.005763916 | 0.557299554 |
| pcaac281.pcaec445               | -0.04369245  | 0.07427563  | 0.557334714 |
| pcaac366.pcaac344               | -0.047106702 | 0.080088183 | 0.557376213 |

|                         |              |             |             |
|-------------------------|--------------|-------------|-------------|
| c51dc.pcaec382          | -0.006327203 | 0.010758493 | 0.557425122 |
| pcaec383.pcaac321       | 0.008727969  | 0.014842492 | 0.557474023 |
| c5.transhydroxyproline  | -0.030188502 | 0.051348066 | 0.557554551 |
| pcaec301.smc161         | -0.0456558   | 0.07766186  | 0.557581098 |
| pcaac420.pcaec422       | -0.020448406 | 0.034786689 | 0.55761898  |
| c8.smc181               | 0.015969874  | 0.027171526 | 0.557672338 |
| pcaac401.pcaac404       | -0.004798019 | 0.008164054 | 0.557700703 |
| c182.pcaec385           | -0.02804619  | 0.047722864 | 0.557708654 |
| pcaec380.pcaac406       | -0.032603057 | 0.055483202 | 0.557754461 |
| c16.pcaec385            | -0.033718259 | 0.05738125  | 0.557755968 |
| pcaac384.lysopcac181    | 0.02926319   | 0.04980842  | 0.55782501  |
| c51.c141                | -0.011358599 | 0.019340634 | 0.557974313 |
| pcaac322.serine         | -0.016601677 | 0.028270449 | 0.558005805 |
| smc260.pcaec401         | 0.022085676  | 0.037615318 | 0.558072164 |
| pcaec340.smc161         | -0.062965481 | 0.107250821 | 0.558112056 |
| phenylalanine.smc261    | 0.013938083  | 0.023744022 | 0.558160168 |
| pcaac380.creatinine     | 0.007001429  | 0.011928103 | 0.558190428 |
| pcaec403.smc260         | 0.025801732  | 0.043961747 | 0.558227898 |
| pcaac366.c16            | 0.016941946  | 0.028873067 | 0.558321598 |
| pcaec425.acetylnithoine | -0.034377975 | 0.058596829 | 0.558379698 |
| lysopcac280.c12         | 0.037963457  | 0.064710247 | 0.558391896 |
| c2.threonine            | 0.018375647  | 0.031323306 | 0.558407867 |
| pcaec405.pcaec403       | 0.02282697   | 0.038912656 | 0.558423848 |
| pcaac321.pcaec341       | -0.070031896 | 0.119398353 | 0.558477985 |
| c3.pcaec420             | -0.026832493 | 0.045753449 | 0.558532597 |
| pcaac300.pcaac240       | 0.02151792   | 0.036691764 | 0.558537555 |
| pcaac321.pcaac341       | -0.006981823 | 0.011906174 | 0.558569306 |
| c18.pcaec360            | 0.0084201    | 0.014364895 | 0.558733737 |
| pcaec361.pcaac426       | 0.049627312  | 0.084667904 | 0.558745362 |
| c0.pcaec340             | -0.028890871 | 0.049300115 | 0.558826044 |
| serotonin.putrescine    | -0.018589794 | 0.031722699 | 0.55883351  |
| pcaec363.c141           | 0.014846041  | 0.025334481 | 0.558838777 |
| pcaac424.c141           | 0.033761418  | 0.057613988 | 0.558844097 |
| putrescine.asparticacid | 0.042145483  | 0.071924639 | 0.558861635 |
| acetylnithoine.pcaac240 | -0.012803535 | 0.021852326 | 0.558898805 |
| c16.pcaec423            | 0.028664833  | 0.048934631 | 0.558988422 |
| smohc221.pcaec341       | 0.036155674  | 0.061722503 | 0.55898857  |
| lysopcac181.pcaac385    | 0.018733399  | 0.031990364 | 0.559111067 |
| pcaac381.pcaac322       | 0.038446801  | 0.065656892 | 0.559126902 |
| smc180.pcaec445         | -0.028581824 | 0.048828497 | 0.559274468 |
| c102.smc240             | -0.032297965 | 0.055180803 | 0.559301061 |
| pcaec343.c162           | 0.054804662  | 0.093640989 | 0.559333251 |
| pcaec365.pcaac364       | -0.041660477 | 0.071184845 | 0.559346639 |

|                         |              |             |             |
|-------------------------|--------------|-------------|-------------|
| c0.lysopcac182          | -0.049808668 | 0.085111689 | 0.55936559  |
| leucine.smohc221        | -0.036153148 | 0.061791864 | 0.559456723 |
| lysopcac280.c8          | -0.028544203 | 0.048798663 | 0.559551393 |
| pcaac321.c162           | -0.050516911 | 0.086374311 | 0.559603599 |
| citruiline.c4           | -0.012006622 | 0.020537328 | 0.559761864 |
| asparagine.smc181       | 0.017818643  | 0.030486223 | 0.559857453 |
| pcaac404.histidine      | 0.029402941  | 0.05031165  | 0.559901501 |
| acetylmithoine.pcaec380 | -0.033791807 | 0.05782966  | 0.559956939 |
| pcaec343.lysine         | 0.044584015  | 0.076307033 | 0.559998607 |
| pcaec405.pcaec401       | 0.023991931  | 0.041070675 | 0.560071923 |
| pcaac401.pcaac365       | -0.055407836 | 0.094866812 | 0.560140924 |
| pcaac363.smohc222       | -0.024972688 | 0.042760304 | 0.560170136 |
| pcaac380.pcaac360       | 0.03964208   | 0.067895236 | 0.560266998 |
| pcaac386.pcaec445       | 0.05303083   | 0.090828128 | 0.560275175 |
| smohc221.pcaec425       | -0.005191624 | 0.008891948 | 0.560276708 |
| smc180.pcaac385         | -0.009483469 | 0.016244484 | 0.560317362 |
| pcaac381.c141oh         | -0.056291384 | 0.096444531 | 0.560404811 |
| pcaec384.c141           | 0.031773044  | 0.054444795 | 0.560460599 |
| pcaec342.pcaec386       | 0.007090905  | 0.01215101  | 0.560472456 |
| smohc141.pcaac405       | -0.037078502 | 0.063547633 | 0.560532419 |
| smc202.pcaac402         | -0.03201813  | 0.054881169 | 0.560577667 |
| glutamine.c5            | -0.007724193 | 0.013241294 | 0.560622647 |
| pcaac322.glutamicacid   | 0.032407304  | 0.055577013 | 0.560780396 |
| smohc141.pcaec383       | -0.034861443 | 0.05978955  | 0.560805296 |
| glutamicacid.pcaec446   | 0.054999258  | 0.094328168 | 0.560809476 |
| isoleucine.pcaec361     | 0.004367714  | 0.00749267  | 0.560897652 |
| smohc241.c8             | -0.027615098 | 0.047381949 | 0.56097325  |
| smc241.c51dc            | -0.06773812  | 0.116232724 | 0.560999331 |
| glycine.threonine       | -0.01375967  | 0.023613069 | 0.561043594 |
| smohc241.lysopcac160    | 0.011312473  | 0.019416838 | 0.561112541 |
| c51.pcaac321            | 0.006979185  | 0.011982267 | 0.561214621 |
| pcaec402.pcaac361       | 0.028544869  | 0.049015011 | 0.561274741 |
| pcaec381.c142           | 0.023124451  | 0.039709116 | 0.561290708 |
| pcaac421.pcaac363       | -0.008200898 | 0.014082843 | 0.56129986  |
| pcaac421.pcaec444       | -0.067240085 | 0.115468645 | 0.561306043 |
| isoleucine.c3           | 0.024982384  | 0.042902027 | 0.561313363 |
| c5.pcaac365             | -0.015679903 | 0.026927187 | 0.561316656 |
| smc261.smc240           | 0.014421534  | 0.024769554 | 0.561369895 |
| pcaac424.pcaec343       | 0.04303136   | 0.073919904 | 0.561432543 |
| isoleucine.smc161       | -0.027583866 | 0.047385233 | 0.561442947 |
| pcaac421.prolinr        | 0.016707903  | 0.028703076 | 0.561459715 |
| glutamicacid.pcaac422   | 0.024673582  | 0.042391736 | 0.561497969 |
| pcaac240.c3             | 0.026172045  | 0.04496803  | 0.561513459 |



|                               |              |             |             |
|-------------------------------|--------------|-------------|-------------|
| pcaac422.smohc222             | 0.002637007  | 0.00453157  | 0.561577577 |
| pcaac344.pcaec386             | 0.0106271    | 0.018262271 | 0.561579885 |
| pcaec401.methioninesulfoxide  | 0.008190414  | 0.014078943 | 0.561691644 |
| pcaec343.smc202               | 0.041558598  | 0.071444671 | 0.561731917 |
| serine.c0                     | -0.000450564 | 0.000774869 | 0.561877897 |
| c2.pcaec360                   | -0.005152332 | 0.008861158 | 0.561891749 |
| isoleucine.arginine           | -0.040214275 | 0.069161966 | 0.561892171 |
| pcaec341.pcaec404             | -0.012586051 | 0.02164615  | 0.561895856 |
| pcaac321.lysopcac170          | 0.013852372  | 0.023824364 | 0.561901236 |
| lysopcac281.pcaec386          | 0.016653903  | 0.028642897 | 0.561904607 |
| pcaac424.tyrosine             | -0.03607215  | 0.062040348 | 0.561905762 |
| c5.ornithine                  | -0.025378885 | 0.043657586 | 0.56198221  |
| pcaac366.pcaac420             | -0.053184448 | 0.091546305 | 0.562224075 |
| pcaac403.c141oh               | -0.06010583  | 0.103467804 | 0.562253266 |
| lysopcac181.prolinr           | -0.030330373 | 0.052213931 | 0.562271257 |
| pcaac363.pcaec422             | -0.012537052 | 0.021583757 | 0.56229191  |
| lysopcac170.smc161            | 0.037449779  | 0.064480008 | 0.562331642 |
| kynurenine.pcaac281           | 0.000757597  | 0.001304411 | 0.562332088 |
| isoleucine.acetylmethionine   | 0.025511672  | 0.043926653 | 0.562343651 |
| c5.phenylalanine              | -0.037497773 | 0.064592126 | 0.562509838 |
| pcaac424.smohc222             | -0.017266045 | 0.029743692 | 0.562534906 |
| pcaec380.pcaac360             | -0.03703863  | 0.063812342 | 0.562577832 |
| pcaec380.pcaac420             | -0.056406288 | 0.097187959 | 0.562609435 |
| phenylalanine.pcaac420        | 0.043355309  | 0.074721156 | 0.562713963 |
| pcaac422.ornithine            | -0.017132447 | 0.029528242 | 0.562729136 |
| pcaac240.pcaec321             | 0.019183239  | 0.033064926 | 0.56275377  |
| putrescine.pcaec362           | -0.007487791 | 0.012906887 | 0.562773712 |
| alphaaminoadipicacid.pcaac361 | -0.033536736 | 0.057809    | 0.562779858 |
| smc181.pcaac300               | 0.027026151  | 0.04658707  | 0.562785742 |
| smohc221.lysopcac160          | 0.031687091  | 0.054623278 | 0.562798482 |
| isoleucine.pcaac406           | 0.025667401  | 0.044251299 | 0.562842247 |
| pcaec361.asparticacid         | 0.022066566  | 0.038044707 | 0.562856059 |
| pcaac406.smohc161             | -0.010037666 | 0.017306767 | 0.56287735  |
| prolinr.pcaec340              | 0.044605453  | 0.07691353  | 0.56290571  |
| pcaac425.pcaec385             | 0.03592883   | 0.061959158 | 0.562948484 |
| smc181.pcaac364               | -0.029431483 | 0.050757668 | 0.56297281  |
| pcaec382.c102                 | -0.028724399 | 0.049558831 | 0.563134928 |
| isoleucine.pcaec444           | 0.055942182  | 0.096518408 | 0.563135512 |
| pcaec385.pcaec401             | 0.031325975  | 0.054054203 | 0.56318409  |
| pcaec365.methioninesulfoxide  | 0.007827063  | 0.013508301 | 0.563253208 |
| smc161.phenylalanine          | 0.032610987  | 0.056292837 | 0.563331561 |
| putrescine.lysopcac281        | -0.009089804 | 0.015692719 | 0.563380442 |
| pcaac344.c4                   | -0.012759716 | 0.022029206 | 0.563393163 |

|                                 |              |             |             |
|---------------------------------|--------------|-------------|-------------|
| pcaac344.pcaac406               | -0.029115077 | 0.050266427 | 0.563395163 |
| acetylmethionine.c2             | 0.021583086  | 0.037270925 | 0.563481785 |
| prolinr.putrescine              | -0.020615937 | 0.035602267 | 0.563497898 |
| pcaac421.c14                    | -0.031776341 | 0.054905219 | 0.563708824 |
| pcaac343.histidine              | 0.041768976  | 0.072175469 | 0.563732178 |
| pcaec425.ornithine              | -0.02267082  | 0.039196742 | 0.563953586 |
| pcaac323.pcaec420               | -0.019320999 | 0.033410193 | 0.564013343 |
| pcaac300.lysopcac180            | -0.022952809 | 0.039694451 | 0.564053261 |
| glutamine.pcaac384              | 0.051471136  | 0.089022067 | 0.564089087 |
| c10.histidine                   | -0.037326657 | 0.064601427 | 0.564348113 |
| smohc141.lysopcac160            | -0.014781729 | 0.025584409 | 0.564372423 |
| lysopcac203.kynurenine          | 0.003667163  | 0.006347693 | 0.564404304 |
| lysopcac181.glutamicacid        | 0.026423548  | 0.045743105 | 0.564447985 |
| pcaec404.pcaac386               | 0.014350896  | 0.024850184 | 0.564551936 |
| smc241.lysine                   | 0.035356252  | 0.061224779 | 0.564561259 |
| pcaac240.pcaec340               | 0.033360686  | 0.057770466 | 0.564570115 |
| c5.pcaec365                     | -0.016332495 | 0.028283174 | 0.56457433  |
| c8.creatinine                   | 0.006603882  | 0.011439078 | 0.564678273 |
| acetylmethionine.c162           | -0.053091252 | 0.091963925 | 0.564680813 |
| pcaec386.c142                   | 0.0281847    | 0.048829132 | 0.564744428 |
| smc161.creatinine               | -0.004239253 | 0.00734543  | 0.564800217 |
| serine.pcaec386                 | 0.004277292  | 0.007412235 | 0.564847093 |
| pcaac343.prolinr                | 0.015476744  | 0.02682146  | 0.564867249 |
| h1.smc180                       | 0.013180508  | 0.022842718 | 0.564878708 |
| pcaec322.smc181                 | -0.022539851 | 0.039063975 | 0.56488747  |
| smc160.pcaec364                 | -0.01707876  | 0.029607039 | 0.564988805 |
| smc180.pcaec422                 | 0.027448099  | 0.047598288 | 0.565114436 |
| lysopcac170.c51dc               | 0.078825531  | 0.136705672 | 0.565150733 |
| pcaac406.c101                   | 0.007108125  | 0.012329766 | 0.565222406 |
| pcaec340.pcaec402               | 0.042372791  | 0.073501004 | 0.565228175 |
| smohc241.pcaec364               | 0.016052654  | 0.027846111 | 0.565238458 |
| smc241.pcaec422                 | -0.01833852  | 0.031817802 | 0.565317333 |
| c2.glutamine                    | 0.016717232  | 0.029011689 | 0.565409225 |
| smohc161.acetylmethionine       | -0.014126962 | 0.024522893 | 0.565511408 |
| pcaac401.pcaec422               | -0.139218893 | 0.241670169 | 0.565513133 |
| pcaec362.lysopcac161            | 0.043705057  | 0.075871137 | 0.565531041 |
| h1.smc202                       | 0.051403731  | 0.089274488 | 0.565698925 |
| pcaec360.pcaac365               | -0.037886677 | 0.065803484 | 0.565725419 |
| pcaac405.pcaec403               | -0.053440092 | 0.092823986 | 0.565752803 |
| glutamine.smc181                | 0.007773305  | 0.013502854 | 0.565776795 |
| lysopcac281.ornithine           | 0.018890365  | 0.032815055 | 0.565788345 |
| smc202.creatinine               | -0.004199608 | 0.00729565  | 0.56580842  |
| methioninesulfoxide.lysopcac161 | 0.017388303  | 0.030209955 | 0.565842045 |

|                                |              |             |             |
|--------------------------------|--------------|-------------|-------------|
| c5.pcaec341                    | -0.051389024 | 0.089287158 | 0.56586505  |
| pcaec341.pcaec422              | -0.021588234 | 0.037509874 | 0.565873858 |
| methioninesulfoxide.h1         | 0.003375059  | 0.005864921 | 0.56592055  |
| pcaec443.smc260                | 0.023020753  | 0.040016116 | 0.566040828 |
| pcaac321.pcaac386              | -0.015959007 | 0.027761028 | 0.566321464 |
| citruline.lysopcac180          | 0.022122179  | 0.038487786 | 0.566379796 |
| pcaac322.pcaac364              | -0.039513542 | 0.068748733 | 0.566400975 |
| c12.pcaac341                   | 0.007176917  | 0.012488062 | 0.566435234 |
| leucine.lysopcac281            | -0.008176745 | 0.014228841 | 0.566463777 |
| asparticacid.phenylalanine     | 0.049417503  | 0.086033568 | 0.566640508 |
| pcaec405.c141                  | 0.029048612  | 0.050577832 | 0.566683059 |
| glutamicacid.smc161            | 0.056942997  | 0.099148975 | 0.566694726 |
| pcaac342.lysopcac181           | 0.016669112  | 0.029034145 | 0.566827356 |
| pcaec445.alanine               | -0.006138737 | 0.010692965 | 0.566847463 |
| pcaac364.lysine                | 0.045004412  | 0.078417514 | 0.566971301 |
| methionine.c0                  | -0.000326015 | 0.000568122 | 0.567012188 |
| pcaac425.pcaec386              | 0.012545006  | 0.021862699 | 0.567038109 |
| pcaac380.acetylnithoine        | -0.011935009 | 0.020800638 | 0.56705683  |
| c142.ornithine                 | -0.017565132 | 0.030613414 | 0.567062581 |
| pcaec386.pcaac322              | -0.034311148 | 0.059806313 | 0.56710844  |
| c51.c3                         | 0.017714124  | 0.030878798 | 0.567134213 |
| lysopcac160.c102               | -0.024235475 | 0.042249799 | 0.567163114 |
| pcaac426.histidine             | -0.045024731 | 0.078524697 | 0.567325366 |
| c16.kynurenine                 | -0.01163583  | 0.020296791 | 0.567392084 |
| lysopcac181.h1                 | -0.008243985 | 0.014382231 | 0.567444727 |
| pcaac380.pcaec422              | -0.012078614 | 0.021074788 | 0.567495546 |
| kynurenine.lysopcac280         | -0.005915662 | 0.010322115 | 0.567512717 |
| pcaac300.pcaac422              | -0.026450438 | 0.046159757 | 0.567570853 |
| pcaec404.serine                | -0.048432045 | 0.084527437 | 0.567601358 |
| pcaec381.pcaac300              | -0.039522955 | 0.068984501 | 0.567634515 |
| c142.asymmetricdimethylarginin | -0.00604364  | 0.010552468 | 0.567771072 |
| pcaec445.pcaac420              | 0.076133034  | 0.132983323 | 0.567921194 |
| pcaec361.pcaec403              | -0.0376957   | 0.065852512 | 0.567971487 |
| c2.pcaec403                    | 0.020818551  | 0.036369034 | 0.567972146 |
| pcaac362.methionine            | -0.021950979 | 0.038351919 | 0.568018373 |
| pcaec425.lysopcac182           | 0.027179939  | 0.047488127 | 0.568021371 |
| serine.smc260                  | -0.018572278 | 0.032452068 | 0.568057533 |
| pcaec444.c141oh                | 0.050577359  | 0.088386267 | 0.568103321 |
| c141oh.pcaec424                | 0.019061688  | 0.033312602 | 0.568119821 |
| c18.pcaac300                   | -0.031987766 | 0.055904708 | 0.568135204 |
| pcaec363.methionine            | -0.038016257 | 0.066462112 | 0.568260063 |
| smc180.acetylnithoine          | -0.013078223 | 0.022866233 | 0.568296652 |
| lysopcac180.pcaec343           | 0.044445432  | 0.077709883 | 0.568299518 |

|                                |              |             |             |
|--------------------------------|--------------|-------------|-------------|
| lysopcac181.pcaec364           | -0.015047316 | 0.026312466 | 0.56834703  |
| leucine.serine                 | 0.026695363  | 0.046689741 | 0.568420952 |
| c162.pcaec420                  | -0.012219701 | 0.021374187 | 0.56845957  |
| pcaac361.c141                  | -0.01884386  | 0.0329689   | 0.568553436 |
| pcaac341.pcaac386              | -0.013169513 | 0.023044055 | 0.568601982 |
| pcaac402.smc241                | -0.027815255 | 0.048677249 | 0.568649833 |
| smc261.pcaec301                | 0.037449207  | 0.065537713 | 0.568654873 |
| pcaec342.glutamicacid          | 0.019394891  | 0.033942406 | 0.568660772 |
| pcaac384.asymmetricdimethylar; | 0.009606752  | 0.016821676 | 0.568871825 |
| pcaac323.h1                    | 0.000815908  | 0.001428723 | 0.568884426 |
| pcaec381.smohc161              | 0.022752639  | 0.039843251 | 0.568898761 |
| serine.lysopcac161             | 0.036779029  | 0.064429945 | 0.56904495  |
| c142.lysopcac182               | 0.026049893  | 0.045665457 | 0.569306442 |
| pcaac383.pcaac240              | -0.011190048 | 0.019616264 | 0.569308664 |
| pcaec423.pcaac386              | 0.00914225   | 0.016028431 | 0.569356224 |
| pcaec381.transhydroxyproline   | -0.053098361 | 0.093094002 | 0.569358597 |
| c162.isoleucine                | -0.011279479 | 0.019778876 | 0.569422524 |
| pcaac421.smc202                | -0.038604427 | 0.067703691 | 0.569478168 |
| pcaec383.c102                  | -0.020966352 | 0.036777027 | 0.569547867 |
| pcaec363.pcaec401              | 0.051695255  | 0.090680863 | 0.569557827 |
| smc180.lysopcac160             | -0.009938303 | 0.017435647 | 0.569611869 |
| methioninesulfoxide.pcaac386   | 0.00922016   | 0.016176378 | 0.569626965 |
| pcaac402.pcaec360              | -0.003241857 | 0.005687966 | 0.569645027 |
| smc161.pcaac321                | 0.01506426   | 0.026436174 | 0.569722785 |
| pcaac362.c101                  | -0.028938668 | 0.050799958 | 0.569841711 |
| pcaec420.pcaec301              | -0.044178675 | 0.07755725  | 0.569863807 |
| smohc161.smohc241              | 0.09556726   | 0.167778636 | 0.569879605 |
| pcaac321.pcaec446              | -0.022894867 | 0.040196439 | 0.569899061 |
| c102.pcaec402                  | 0.033050077  | 0.058028357 | 0.569915331 |
| pcaac342.pcaec420              | -0.012442385 | 0.021851606 | 0.570014637 |
| smc202.h1                      | 0.000622784  | 0.001093823 | 0.570040802 |
| c182.pcaec445                  | -0.041957161 | 0.073696349 | 0.570067986 |
| pcaec365.pcaec342              | 0.094714813  | 0.166375012 | 0.570094874 |
| smc180.c102                    | 0.016844993  | 0.029592809 | 0.570134926 |
| pcaec361.c51dc                 | 0.082758165  | 0.145387825 | 0.570136552 |
| c14.pcaac404                   | 0.001610858  | 0.002830108 | 0.570161795 |
| pcaac240.pcaec362              | -0.005700501 | 0.010015794 | 0.570185468 |
| pcaac386.pcaac344              | -0.057854723 | 0.10166108  | 0.570224095 |
| serotonin.smc240               | -0.032606338 | 0.057298531 | 0.570246752 |
| pcaac384.pcaac406              | -0.021716781 | 0.038165695 | 0.570278905 |
| asparagine.pcaec341            | 0.039983772  | 0.070269147 | 0.570281748 |
| asparagine.serotonin           | -0.049355143 | 0.086745944 | 0.570313527 |
| lysopcac180.pcaac361           | 0.043396712  | 0.076300245 | 0.570448574 |

|                              |              |             |             |
|------------------------------|--------------|-------------|-------------|
| citruLine.h1                 | -0.001826346 | 0.003211615 | 0.570511786 |
| pcaec361.pcaec444            | -0.130475424 | 0.22946765  | 0.570558159 |
| pcaac323.smohc241            | 0.044829467  | 0.07889118  | 0.570799267 |
| pcaac403.pcaec384            | -0.033109464 | 0.058267001 | 0.570804267 |
| pcaac385.pcaec380            | -0.045939014 | 0.08084844  | 0.570821498 |
| pcaec365.glutamicacid        | 0.028706279  | 0.050520748 | 0.570824072 |
| serotonin.smc202             | -0.024762629 | 0.043594131 | 0.570946638 |
| pcaec421.pcaac404            | -0.007303866 | 0.012858526 | 0.570952958 |
| pcaec421.pcaac386            | 0.013493181  | 0.023757905 | 0.57100203  |
| smohc161.prolinr             | 0.027103455  | 0.047737723 | 0.571128857 |
| smohc161.pcaac422            | -0.018043983 | 0.031785352 | 0.571179824 |
| smohc161.pcaac421            | -0.017799455 | 0.031361403 | 0.571263181 |
| pcaec403.lysopcac160         | 0.02436976   | 0.042939864 | 0.571281442 |
| pcaac401.phenylalanine       | 0.033919812  | 0.0597676   | 0.571284059 |
| pcaec424.c0                  | 0.000488704  | 0.000861273 | 0.571357109 |
| c141oh.pcaac281              | -0.001390317 | 0.002450415 | 0.571384311 |
| pcaec364.smohc161            | 0.018703498  | 0.032975494 | 0.571510669 |
| pcaec446.pcaac384            | 0.042171663  | 0.07435977  | 0.571553878 |
| pcaec420.transhydroxyproline | 0.012965215  | 0.022863229 | 0.571589738 |
| smc160.pcaac380              | 0.033970195  | 0.059907392 | 0.571611434 |
| c3.smohc222                  | -0.005286991 | 0.009324875 | 0.57165747  |
| pcaec422.lysine              | 0.055741704  | 0.098313938 | 0.571657858 |
| pcaac380.c18                 | -0.021996972 | 0.038798416 | 0.571672234 |
| prolinr.pcaac421             | 0.008455401  | 0.014915247 | 0.571712162 |
| pcaac404.pcaec321            | -0.009176655 | 0.016188723 | 0.57174041  |
| pcaec384.histidine           | -0.032410512 | 0.057192044 | 0.571847875 |
| pcaac420.pcaac426            | -0.067071616 | 0.118362371 | 0.571870127 |
| pcaac386.lysopcac280         | 0.003106428  | 0.005482752 | 0.571925299 |
| pcaac323.lysopcac182         | -0.009623173 | 0.016984878 | 0.571931353 |
| pcaac381.transhydroxyproline | 0.03406289   | 0.060127301 | 0.571972091 |
| methionine.alanine           | 0.013207726  | 0.023319835 | 0.572066855 |
| c101.pcaac360                | -0.014759536 | 0.026061377 | 0.572090936 |
| citruLine.c5                 | 0.005828972  | 0.010292554 | 0.572096689 |
| pcaec385.lysopcac281         | 0.00777323   | 0.013729711 | 0.572210405 |
| pcaec443.pcaac404            | -0.00894078  | 0.015792489 | 0.572223944 |
| pcaac426.pcaac421            | -0.015008447 | 0.026510676 | 0.572232653 |
| lysopcac203.pcaec380         | -0.0327292   | 0.05781248  | 0.572233688 |
| lysopcac160.glycine          | 0.039429441  | 0.069652735 | 0.572261385 |
| smc181.pcaac425              | 0.059501833  | 0.105124953 | 0.57231255  |
| pcaac383.pcaec341            | 0.033611592  | 0.059390251 | 0.572357262 |
| h1.c51                       | -0.045804351 | 0.080951675 | 0.572439438 |
| pcaec443.pcaac365            | -0.040545317 | 0.071660231 | 0.572455685 |
| c0.pcaac323                  | -0.050912551 | 0.089990815 | 0.572487326 |

|                                |              |             |             |
|--------------------------------|--------------|-------------|-------------|
| c142.lysopcac281               | 0.007390805  | 0.01306467  | 0.572516777 |
| glutamine.pcaac424             | -0.008150364 | 0.014411269 | 0.572621475 |
| smc241.isoleucine              | 0.013610053  | 0.02406538  | 0.572628248 |
| pcaac363.pcaec341              | 0.033423691  | 0.059116022 | 0.572732337 |
| lysine.valine                  | -0.044724969 | 0.079105522 | 0.572737593 |
| lysopcac140.pcaec322           | -0.02823711  | 0.049951853 | 0.572803456 |
| pcaec322.pcaec380              | -0.030806507 | 0.054502053 | 0.57283792  |
| smohc222.pcaac422              | -0.013831244 | 0.024470235 | 0.572843656 |
| smc240.c12                     | 0.028401447  | 0.050254236 | 0.572892471 |
| c102.phenylalanine             | -0.02883943  | 0.05102932  | 0.572893265 |
| serine.pcaac363                | -0.007496304 | 0.013264222 | 0.57289455  |
| smohc141.isoleucine            | 0.018749861  | 0.033184468 | 0.572984781 |
| pcaac343.c51dc                 | 0.066520151  | 0.117740059 | 0.57301497  |
| glutamine.threonine            | 0.026629738  | 0.047137312 | 0.573038706 |
| pcaec362.pcaec402              | -0.025978518 | 0.04598949  | 0.573079562 |
| prolinr.phenylalanine          | 0.038369614  | 0.067940319 | 0.573164183 |
| pcaec386.pcaec362              | 0.01103567   | 0.019545294 | 0.573255362 |
| pcaac323.pcaac404              | 0.009749205  | 0.017268318 | 0.573288256 |
| alphaaminoadipicacid.pcaec386  | -0.004500001 | 0.007971254 | 0.573317525 |
| pcaac365.smc181                | -0.023741309 | 0.04206509  | 0.573408503 |
| c141.c182                      | -0.028805658 | 0.051047822 | 0.573481016 |
| pcaac406.pcaac385              | -0.020119064 | 0.035655041 | 0.573493138 |
| pcaec403.glutamicacid          | 0.063725376  | 0.112935536 | 0.573497586 |
| c10.pcaac424                   | 0.004643463  | 0.008230111 | 0.573537673 |
| pcaec300.c8                    | -0.033826951 | 0.059957031 | 0.57354965  |
| pcaac402.pcaac425              | -0.104516581 | 0.185276248 | 0.57360015  |
| lysopcac170.c0                 | -0.002558776 | 0.004536476 | 0.573645845 |
| pcaac420.glycine               | 0.025888248  | 0.045912441 | 0.573770394 |
| pcaac424.pcaec384              | -0.023224024 | 0.041196681 | 0.573855887 |
| pcaec406.asparticacid          | 0.030491476  | 0.054101055 | 0.573946226 |
| pcaac425.spermidine            | -0.040138239 | 0.071217894 | 0.573949326 |
| pcaec381.smc241                | -0.020860671 | 0.037014837 | 0.573964095 |
| pcaac421.pcaec404              | -0.007835827 | 0.013905498 | 0.574011764 |
| lysopcac204.smc260             | -0.025843722 | 0.045862431 | 0.574012047 |
| pcaec341.c0                    | 0.00034382   | 0.000610321 | 0.574122027 |
| pcaec405.pcaac380              | 0.063412051  | 0.112569895 | 0.574142785 |
| lysopcac204.c102               | -0.023828495 | 0.042301663 | 0.574151919 |
| glutamicacid.lysopcac182       | 0.035876759  | 0.063691866 | 0.574160669 |
| lysopcac204.methioninesulfoxid | 0.024503118  | 0.043501333 | 0.574169874 |
| smc240.c181                    | -0.005925592 | 0.010521953 | 0.574243286 |
| lysopcac203.pcaec425           | -0.011074506 | 0.019666027 | 0.574267651 |
| pcaec443.serine                | -0.041519668 | 0.073731024 | 0.574271289 |
| pcaec322.pcaac425              | 0.069265914  | 0.123070694 | 0.574481383 |

|                                |              |             |             |
|--------------------------------|--------------|-------------|-------------|
| phenylalanine.pcaec421         | 0.001024051  | 0.001819569 | 0.574491855 |
| ornithine.pcaac404             | -0.004629579 | 0.008227317 | 0.574553181 |
| pcaec301.pcaac385              | 0.007693412  | 0.013673523 | 0.57459258  |
| pcaec384.smc260                | 0.021425662  | 0.038081276 | 0.574606482 |
| pcaec406.pcaec422              | -0.016936552 | 0.03010482  | 0.574636218 |
| smc161.acetylnithoine          | -0.015518499 | 0.027592653 | 0.574752962 |
| pcaac320.lysopcac170           | 0.008150957  | 0.01449367  | 0.574775868 |
| pcaec406.pcaec360              | -0.003743539 | 0.006656877 | 0.574792037 |
| smohc222.prolinr               | 0.025139158  | 0.044707354 | 0.574827288 |
| isoleucine.alanine             | 0.007121272  | 0.01266453  | 0.574830155 |
| c14.asparagine                 | -0.008670744 | 0.01542029  | 0.574834262 |
| pcaec446.pcaac401              | -0.004835638 | 0.008601079 | 0.574889647 |
| arginine.c101                  | 0.004356294  | 0.007748829 | 0.574907072 |
| pcaac424.pcaac322              | 0.035405632  | 0.062983965 | 0.574941095 |
| arginine.pcaec444              | 0.062358184  | 0.110945194 | 0.574991558 |
| pcaec363.pcaec383              | -0.038572137 | 0.068646205 | 0.575103922 |
| lysopcac181.c10                | 0.022539521  | 0.040126987 | 0.575234925 |
| pcaec406.spermidine            | -0.039890046 | 0.071028551 | 0.575302201 |
| pcaec444.pcaac404              | -0.002294719 | 0.004085999 | 0.575302471 |
| asparticacid.c141              | -0.029959157 | 0.053353741 | 0.575360963 |
| smohc161.pcaec321              | 0.027972126  | 0.049825697 | 0.57544233  |
| c162.histidine                 | -0.03635392  | 0.064759664 | 0.575464675 |
| pcaec401.pcaec420              | -0.012688331 | 0.022603793 | 0.575485289 |
| pcaac322.c12                   | 0.026184503  | 0.046652117 | 0.575529419 |
| pcaec340.pcaac344              | 0.052285276  | 0.093170745 | 0.575593652 |
| pcaac364.asymmetricdimethylar; | 0.010673158  | 0.019023053 | 0.575670164 |
| smohc141.acetylnithoine        | -0.016063913 | 0.028634286 | 0.575712089 |
| lysopcac170.taurine            | 0.019923722  | 0.035514925 | 0.575716852 |
| pcaac402.pcaac380              | 0.044003938  | 0.078453182 | 0.575785856 |
| pcaec343.isoleucine            | 0.012043241  | 0.021472102 | 0.575796509 |
| smc240.pcaec365                | -0.021949665 | 0.039140745 | 0.575857999 |
| c101.pcaec401                  | -0.015868729 | 0.028303881 | 0.575948109 |
| c162.lysopcac280               | -0.009733886 | 0.017361622 | 0.575948285 |
| pcaec364.c181                  | -0.007096159 | 0.01265754  | 0.575967546 |
| pcaac240.c141oh                | -0.072668194 | 0.129627281 | 0.575990418 |
| pcaec425.pcaac404              | -0.005488981 | 0.009792538 | 0.576035601 |
| creatinine.pcaec421            | 0.012572126  | 0.022431355 | 0.576073557 |
| lysopcac204.pcaac401           | -0.001774271 | 0.003166046 | 0.576117747 |
| lysopcac170.pcaec422           | 0.018145829  | 0.032380719 | 0.576128764 |
| pcaac403.pcaac344              | -0.053968346 | 0.096344538 | 0.576285203 |
| pcaec445.prolinr               | 0.015278703  | 0.027277062 | 0.576305458 |
| pcaec385.pcaac384              | 0.06589508   | 0.117647469 | 0.576321701 |
| smohc241.isoleucine            | 0.010412837  | 0.018590978 | 0.576324839 |

|                                |              |             |             |
|--------------------------------|--------------|-------------|-------------|
| asparticacid.arginine          | 0.044494964  | 0.079456158 | 0.576398099 |
| lysopcac140.lysopcac160        | -0.012243112 | 0.021865117 | 0.576436077 |
| smc260.pcaac404                | -0.001894428 | 0.003383731 | 0.57648659  |
| pcaac422.methioninesulfoxide   | 0.00977455   | 0.017460188 | 0.576516877 |
| c3.pcaac406                    | 0.02145494   | 0.038331252 | 0.576581369 |
| c4.pcaac424                    | -0.011587696 | 0.020703635 | 0.57660226  |
| c18.lysopcac203                | -0.009777057 | 0.017469049 | 0.576612407 |
| pcaac342.pcaac363              | -0.01386166  | 0.024773302 | 0.576706706 |
| c141.pcaac404                  | 0.002248656  | 0.004018872 | 0.576717635 |
| methionine.pcaac322            | -0.035130556 | 0.062799661 | 0.576797532 |
| pcaec381.lysopcac204           | -0.053959005 | 0.096462764 | 0.576818119 |
| smc181.c51dc                   | -0.069387807 | 0.124046048 | 0.576821624 |
| smc180.methioninesulfoxide     | 0.005771316  | 0.010318758 | 0.576867871 |
| pcaec406.pcaec364              | -0.016883551 | 0.03019556  | 0.576978947 |
| pcaec381.pcaec385              | 0.045412972  | 0.081243784 | 0.577093625 |
| smc240.pcaec444                | -0.080936099 | 0.144795246 | 0.577095223 |
| c12.arginine                   | 0.012515831  | 0.022393391 | 0.577137399 |
| pcaec382.phenylalanine         | 0.046186661  | 0.082646134 | 0.577177503 |
| pcaac420.pcaac321              | 0.025850499  | 0.046258793 | 0.577194483 |
| c181.methioninesulfoxide       | 0.007699384  | 0.013778664 | 0.577217059 |
| lysine.alanine                 | -0.021323949 | 0.038163339 | 0.57724122  |
| pcaac421.serine                | 0.036980141  | 0.066196138 | 0.577315969 |
| glycine.lysopcac181            | 0.03108111   | 0.055639755 | 0.577337509 |
| c162.acetylmethionine          | -0.012387065 | 0.022175088 | 0.57734473  |
| c10.c0                         | -0.00043108  | 0.000771775 | 0.577375728 |
| pcaac366.lysopcac160           | 0.010987156  | 0.019674823 | 0.577457312 |
| pcaec405.c142                  | -0.03189657  | 0.057118062 | 0.577460765 |
| pcaac300.pcaec445              | 0.03420415   | 0.061251653 | 0.577469116 |
| c8.lysopcac160                 | 0.014423761  | 0.025831771 | 0.577501199 |
| pcaac343.glutamicacid          | 0.045177511  | 0.080925222 | 0.577576417 |
| pcaac240.pcaac281              | -0.002285395 | 0.004094388 | 0.577634239 |
| asymmetricdimethylarginine.pca | 0.01592222   | 0.028526345 | 0.577647229 |
| c8.pcaac385                    | 0.015571003  | 0.027899355 | 0.577677899 |
| lysopcac160.pcaac322           | 0.049428943  | 0.088607435 | 0.57786274  |
| lysine.pcaac364                | -0.024253128 | 0.043478345 | 0.577877094 |
| pcaac385.methionine            | -0.015183972 | 0.027222446 | 0.577909022 |
| pcaec301.c102                  | -0.021871261 | 0.039214877 | 0.577939892 |
| ornithine.pcaac363             | 0.008928444  | 0.016009277 | 0.577956405 |
| serine.ornithine               | -0.028077591 | 0.050358899 | 0.578061742 |
| pcaac381.pcaac281              | 0.001645377  | 0.002952071 | 0.578188459 |
| c18.pcaac420                   | -0.076170857 | 0.13667681  | 0.578227524 |
| pcaac424.pcaac380              | 0.042571149  | 0.076388798 | 0.578234795 |
| smc160.acetylmethionine        | -0.014938045 | 0.026810814 | 0.578323889 |



|                                 |              |             |             |
|---------------------------------|--------------|-------------|-------------|
| pcaec422.pcaac386               | 0.008749298  | 0.015708686 | 0.578455327 |
| c101.leucine                    | -0.003368152 | 0.006047652 | 0.578480207 |
| h1.smc260                       | -0.021767706 | 0.039085762 | 0.578489649 |
| alphaaminoadipicacid.creatinine | 0.010680055  | 0.019178118 | 0.578512877 |
| smc260.prolinr                  | -0.008582045 | 0.015411283 | 0.578526422 |
| pcaec300.pcaac323               | 0.03270936   | 0.058741163 | 0.578546074 |
| acetylmethionine.transhydroxypr | 0.006178013  | 0.011096156 | 0.578592632 |
| c182.pcaec343                   | -0.038808643 | 0.069704265 | 0.578598845 |
| pcaec443.c4                     | -0.021962562 | 0.039466455 | 0.578785957 |
| pcaac342.pcaac380               | 0.035552434  | 0.063887576 | 0.578787657 |
| pcaac361.c14                    | 0.02860922   | 0.051416032 | 0.578827358 |
| pcaec340.methionine             | -0.020214301 | 0.036328961 | 0.578828842 |
| c16.pcaac240                    | -0.016701343 | 0.030016652 | 0.578843365 |
| lysopcac281.c142                | 0.026031344  | 0.046794747 | 0.578921644 |
| pcaec445.c102                   | -0.015826861 | 0.02846522  | 0.579113008 |
| pcaec365.pcaac422               | -0.04298362  | 0.07736099  | 0.579374155 |
| pcaec342.pcaac444               | 0.063132381  | 0.113626913 | 0.579382887 |
| smc202.smohc161                 | 0.007915147  | 0.014246952 | 0.579412474 |
| pcaac366.pcaac365               | 0.018828506  | 0.033901004 | 0.579529122 |
| smc202.c5                       | -0.00341317  | 0.006147463 | 0.579652352 |
| pcaec382.pcaac364               | -0.041567987 | 0.074868491 | 0.579654157 |
| pcaec385.pcaac423               | -0.006443726 | 0.01160634  | 0.579670017 |
| pcaec444.pcaac422               | 0.031605921  | 0.056933869 | 0.579708363 |
| pcaec444.isoleucine             | 0.008476754  | 0.015273036 | 0.579789896 |
| smohc221.smc181                 | -0.012124165 | 0.021844836 | 0.579790928 |
| ornithine.pcaec385              | -0.031832595 | 0.057365234 | 0.579860446 |
| isoleucine.pcaec341             | -0.019282351 | 0.034754128 | 0.579921181 |
| pcaec364.pcaac446               | -0.037323477 | 0.067285512 | 0.580002274 |
| lysopcac182.smc202              | -0.027036013 | 0.04874422  | 0.580038009 |
| lysine.pcaac360                 | 0.014971785  | 0.027000263 | 0.580137256 |
| pcaac386.smohc221               | 0.021529654  | 0.038831832 | 0.580186424 |
| pcaac402.pcaac422               | 0.10510772   | 0.189583966 | 0.580200492 |
| smc240.pcaec380                 | 0.030129038  | 0.054353388 | 0.580265264 |
| pcaec383.lysopcac181            | -0.036677277 | 0.066179099 | 0.580337031 |
| pcaec360.ornithine              | 0.021256577  | 0.038354886 | 0.580340169 |
| pcaec445.pcaac362               | 0.009932791  | 0.01792487  | 0.580390106 |
| pcaec404.glutamicacid           | 0.051777956  | 0.09348503  | 0.580575072 |
| pcaec340.pcaac404               | -0.006842388 | 0.012354724 | 0.580599618 |
| smc180.lysopcac204              | 0.015550933  | 0.028079698 | 0.580608851 |
| c5.methioninesulfoxide          | 0.010157305  | 0.018347192 | 0.580743857 |
| smc202.pcaac363                 | -0.003941762 | 0.007120073 | 0.58074639  |
| pcaac344.histidine              | 0.035413127  | 0.063972538 | 0.580777094 |
| pcaec446.pcaec301               | 0.039576439  | 0.071499562 | 0.580809598 |

|                                 |              |             |             |
|---------------------------------|--------------|-------------|-------------|
| smc261.leucine                  | -0.00405973  | 0.0073345   | 0.580815404 |
| glutamicacid.pcaec384           | -0.043934848 | 0.079394365 | 0.580908682 |
| smc240.pcaec381                 | -0.012725657 | 0.02299724  | 0.58092167  |
| pcaec402.taurine                | 0.038633551  | 0.069825221 | 0.580967081 |
| kynurenine.putrescine           | -0.016808486 | 0.030380434 | 0.580982473 |
| alphaaminoadipicacid.pcaec321   | 0.014614115  | 0.026415807 | 0.581005055 |
| smc240.histidine                | -0.028846586 | 0.052142342 | 0.581009199 |
| pcaec385.c162                   | 0.053848291  | 0.097349769 | 0.581067369 |
| leucine.pcaec322                | 0.033678707  | 0.060892739 | 0.581108325 |
| pcaac300.pcaac363               | -0.008146057 | 0.014729226 | 0.581127782 |
| asymmetricdimethylarginine.serc | -0.055695534 | 0.100710987 | 0.581148658 |
| pcaec322.pcaec386               | 0.007983577  | 0.014436847 | 0.581164613 |
| pcaec445.glutamicacid           | 0.042037945  | 0.076034492 | 0.581246639 |
| pcaec363.pcaec380               | -0.014671974 | 0.026539087 | 0.581271207 |
| lysopcac160.pcaac320            | 0.022939793  | 0.041498783 | 0.581313304 |
| smc161.pcaac426                 | 0.032213473  | 0.058279605 | 0.581342162 |
| pcaac403.prolinr                | -0.019817354 | 0.03585309  | 0.581343781 |
| smc241.glutamine                | -0.009836971 | 0.01779822  | 0.581373561 |
| pcaac362.pcaac300               | -0.035862074 | 0.064887146 | 0.581380599 |
| pcaec443.pcaec386               | 0.009593233  | 0.017361701 | 0.581470975 |
| pcaac365.lysine                 | 0.05177675   | 0.093706618 | 0.581478111 |
| c182.acetylmithoine             | -0.010258641 | 0.018569708 | 0.581547421 |
| lysopcac182.pcaac402            | 0.016793112  | 0.030401086 | 0.581584497 |
| h1.pcaec422                     | -0.031487502 | 0.057012471 | 0.581648569 |
| pcaec420.pcaec322               | 0.06046036   | 0.109498257 | 0.581739617 |
| smohc161.threonine              | -0.021277111 | 0.03856081  | 0.581997542 |
| pcaac426.pcaac425               | -0.093856775 | 0.170116965 | 0.582039652 |
| lysopcac180.creatinine          | -0.003667402 | 0.006647618 | 0.582061854 |
| pcaec445.pcaac323               | 0.045244381  | 0.082025471 | 0.582128258 |
| smc260.pcaac343                 | 0.02056876   | 0.037291382 | 0.582142399 |
| pcaec446.lysopcac281            | 0.004565414  | 0.008278213 | 0.5821911   |
| pcaec422.c3                     | -0.014130841 | 0.025625203 | 0.582228247 |
| lysopcac281.smc260              | 0.014928418  | 0.027074033 | 0.582262847 |
| c18.pcaac406                    | 0.046545644  | 0.084423427 | 0.582301703 |
| pcaec403.spermidine             | 0.036984683  | 0.067093721 | 0.582367675 |
| pcaec405.lysopcac181            | -0.047094968 | 0.085469202 | 0.582519627 |
| acetylmithoine.pcaec365         | 0.011125782  | 0.020191576 | 0.582523567 |
| pcaac406.pcaac364               | -0.02730059  | 0.049554101 | 0.582582446 |
| phenylalanine.pcaec363          | 0.054808903  | 0.099508556 | 0.582670672 |
| pcaac300.putrescine             | -0.015560503 | 0.028251476 | 0.582677799 |
| smc240.pcaac402                 | 0.048857319  | 0.088717365 | 0.582731093 |
| pcaec364.c18                    | 0.021566156  | 0.039162537 | 0.582747626 |
| pcaec340.methioninesulfoxide    | 0.009158786  | 0.016634916 | 0.582821002 |

|                              |              |             |             |
|------------------------------|--------------|-------------|-------------|
| pcaec403.pcaec406            | 0.028628896  | 0.051999056 | 0.582828073 |
| pcaac323.isoleucine          | 0.009326592  | 0.016941177 | 0.582853876 |
| c2.pcaec382                  | -0.007583851 | 0.013775843 | 0.582860583 |
| smc261.creatinine            | -0.005028124 | 0.009134561 | 0.582906801 |
| c141.c181                    | -0.046122587 | 0.083798418 | 0.582941878 |
| pcaec343.pcaac422            | -0.010579556 | 0.019224424 | 0.582997093 |
| c141oh.pcaec343              | -0.040592809 | 0.073763306 | 0.583001766 |
| pcaac321.c141oh              | -0.057194623 | 0.103937334 | 0.583023519 |
| pcaec381.smc161              | 0.061595387  | 0.111951855 | 0.583081341 |
| pcaac386.prolinr             | 0.016541701  | 0.030065724 | 0.583088608 |
| smc202.lysopcac281           | 0.007557014  | 0.013738748 | 0.583179929 |
| pcaac343.pcaec384            | 0.020019289  | 0.036397868 | 0.583206267 |
| pcaec386.c51dc               | -0.069121103 | 0.125678669 | 0.58322672  |
| lysopcac182.c2               | 0.032265658  | 0.058672041 | 0.583261153 |
| pcaec444.lysopcac281         | 0.007250865  | 0.013186006 | 0.583289517 |
| lysopcac160.pcaec343         | 0.048304494  | 0.087846091 | 0.583299464 |
| pcaac384.threonine           | -0.016883785 | 0.03070798  | 0.583339769 |
| pcaac426.pcaec321            | -0.008351993 | 0.015190641 | 0.583343694 |
| pcaec443.pcaec382            | 0.013205564  | 0.024019335 | 0.583359334 |
| smc160.pcaac381              | 0.024094702  | 0.04382574  | 0.583362506 |
| pcaac341.pcaac321            | 0.032968067  | 0.05996778  | 0.583377046 |
| pcaac343.pcaec422            | -0.013176496 | 0.023970205 | 0.583418023 |
| smc160.c2                    | -0.028512288 | 0.051875116 | 0.583465823 |
| pcaac403.asparagine          | 0.010561166  | 0.019216656 | 0.583499534 |
| histidine.pcaac406           | -0.018099794 | 0.032934126 | 0.583505221 |
| smc240.c8                    | -0.025563436 | 0.046519764 | 0.583544834 |
| pcaec381.pcaac403            | 0.006673722  | 0.012144825 | 0.583549057 |
| smc202.pcaac320              | -0.039300995 | 0.07152846  | 0.583594231 |
| pcaec343.pcaac386            | 0.008487844  | 0.015448242 | 0.583599724 |
| pcaec361.glycine             | 0.014253652  | 0.025951279 | 0.583730365 |
| pcaec405.methioninesulfoxide | 0.012938084  | 0.023558426 | 0.583768169 |
| putrescine.phenylalanine     | -0.016651817 | 0.030321553 | 0.583779864 |
| serotonin.c141               | -0.018447856 | 0.03359346  | 0.583796329 |
| c12.pcaac281                 | -0.000481457 | 0.00087674  | 0.583799736 |
| pcaec444.c0                  | 0.000480056  | 0.000874516 | 0.583941118 |
| pcaec340.arginine            | -0.022032477 | 0.040151851 | 0.584084736 |
| c141.pcaec383                | -0.056874347 | 0.103652182 | 0.584101846 |
| glutamine.c3                 | -0.025047301 | 0.045648261 | 0.584102945 |
| pcaec424.spermidine          | -0.037427685 | 0.068214623 | 0.58412129  |
| methionine.pcaec422          | -0.015523851 | 0.028297688 | 0.584179215 |
| c3.pcaac381                  | 0.011993577  | 0.021863366 | 0.584193755 |
| pcaac321.pcaec361            | 0.007609216  | 0.013872822 | 0.584242676 |
| pcaac360.pcaec401            | 0.03191256   | 0.058182983 | 0.584250848 |

|                        |              |             |             |
|------------------------|--------------|-------------|-------------|
| pcaac366.histidine     | -0.040132422 | 0.073194709 | 0.584380491 |
| c182.tyrosine          | -0.031375648 | 0.05722718  | 0.584402381 |
| smohc241.pcaac426      | 0.020636811  | 0.037652369 | 0.584523435 |
| c181.isoleucine        | 0.011807067  | 0.021543581 | 0.584546039 |
| pcaec443.c51           | -0.046389769 | 0.084653219 | 0.58458526  |
| pcaac404.pcaac341      | -0.005423876 | 0.009897739 | 0.584589538 |
| smc180.phenylalanine   | 0.027077987  | 0.049414633 | 0.584600754 |
| pcaec365.pcaec360      | -0.001904748 | 0.003476401 | 0.584646616 |
| lysopcac280.pcaac405   | -0.039771795 | 0.072592185 | 0.584665962 |
| lysopcac203.pcaac401   | -0.002881556 | 0.005259949 | 0.58470039  |
| pcaec300.pcaec403      | -0.014148598 | 0.025829581 | 0.584743089 |
| c5.pcaac281            | -0.003695275 | 0.006746548 | 0.584769783 |
| pcaec364.smc261        | -0.010446696 | 0.019076391 | 0.584840959 |
| pcaac363.h1            | 0.000994219  | 0.001815786 | 0.584897347 |
| smohc161.asparagine    | 0.006381849  | 0.011655871 | 0.584910892 |
| pcaec362.pcaac402      | -0.024123917 | 0.04406319  | 0.584936675 |
| c142.pcaac404          | 0.001448422  | 0.002645682 | 0.584949044 |
| lysopcac180.smohc241   | 0.036269416  | 0.066279046 | 0.58511587  |
| pcaec385.lysopcac170   | -0.005482805 | 0.010019418 | 0.585119308 |
| histidine.glutamicacid | 0.021089719  | 0.038542511 | 0.585144817 |
| pcaec365.pcaac424      | -0.009924224 | 0.018137249 | 0.58514968  |
| c12.pcaec362           | 0.009660885  | 0.017657922 | 0.585190982 |
| pcaac421.pcaac386      | 0.006884682  | 0.0125864   | 0.585272883 |
| pcaac421.pcaec321      | 0.023400072  | 0.042793746 | 0.585398419 |
| pcaec445.creatinine    | -0.004681964 | 0.008562925 | 0.585425104 |
| c0.pcaec322            | 0.043877345  | 0.080251242 | 0.585440106 |
| pcaec425.pcaac322      | -0.039118133 | 0.071551288 | 0.585464186 |
| pcaec383.histidine     | 0.053279931  | 0.097467574 | 0.585513491 |
| pcaac385.glutamicacid  | 0.026580964  | 0.048626059 | 0.585515083 |
| pcaec384.pcaec446      | -0.056844995 | 0.103993939 | 0.585530138 |
| pcaac385.pcaac360      | 0.015363727  | 0.028114839 | 0.585636414 |
| c142.pcaac383          | -0.003487755 | 0.006383079 | 0.585675359 |
| glutamine.smc161       | -0.031683796 | 0.058001562 | 0.585777348 |
| smc260.pcaac421        | -0.015317648 | 0.028043384 | 0.585808255 |
| pcaec364.pcaec386      | 0.013518949  | 0.024751645 | 0.585827905 |
| smc160.lysopcac160     | -0.015890233 | 0.029094443 | 0.585843986 |
| pcaac385.pcaac343      | -0.013197075 | 0.02416962  | 0.585940821 |
| pcaac405.serotonin     | 0.052488551  | 0.096130026 | 0.585942839 |
| pcaac401.tyrosine      | -0.030719005 | 0.056262265 | 0.58595628  |
| pcaec422.pcaac364      | -0.030670159 | 0.05618104  | 0.58601116  |
| smc160.lysine          | 0.030645247  | 0.056144703 | 0.586073122 |
| pcaac360.c0            | 0.000336496  | 0.000616604 | 0.586142469 |
| c8.alanine             | -0.022210116 | 0.040700637 | 0.586163346 |

|                              |              |             |             |
|------------------------------|--------------|-------------|-------------|
| pcaec362.pcaec363            | 0.018546181  | 0.033986772 | 0.586167681 |
| c12.pcaec380                 | -0.024760913 | 0.045380926 | 0.586211856 |
| pcaec443.pcaac300            | -0.032931242 | 0.060355884 | 0.586216002 |
| c0.serotonin                 | 0.051108193  | 0.093678804 | 0.586249861 |
| pcaac403.histidine           | -0.060418083 | 0.110746523 | 0.586260494 |
| glutamine.c141               | -0.018312177 | 0.03357802  | 0.586391351 |
| h1.smc160                    | 0.055887116  | 0.102477519 | 0.586392904 |
| pcaac342.pcaec362            | -0.010872031 | 0.019937252 | 0.58642539  |
| lysopcac181.c141             | 0.014065487  | 0.025794593 | 0.586441985 |
| pcaec364.serine              | -0.054074003 | 0.099174161 | 0.58647307  |
| c2.lysopcac203               | -0.006959841 | 0.012768713 | 0.586591694 |
| pcaec446.pcaac344            | 0.031627354  | 0.058029685 | 0.586625743 |
| smc160.pcaac360              | 0.042113331  | 0.077271581 | 0.5866368   |
| pcaac403.smc260              | 0.030050886  | 0.055159111 | 0.586774308 |
| pcaac363.c4                  | -0.01004035  | 0.018429604 | 0.586780469 |
| pcaec383.putrescine          | 0.054381487  | 0.099835221 | 0.586836885 |
| pcaac363.smc261              | 0.016856839  | 0.030958682 | 0.586986236 |
| lysopcac182.isoleucine       | -0.033279723 | 0.061131005 | 0.58705119  |
| c5.smc180                    | 0.020569475  | 0.037786198 | 0.587075409 |
| pcaec402.methioninesulfoxide | 0.007596212  | 0.013955795 | 0.587116282 |
| smohc222.glycine             | -0.061944557 | 0.113816111 | 0.587153317 |
| pcaec343.pcaec384            | 0.018212053  | 0.033474287 | 0.587283862 |
| pcaac323.smc240              | -0.020850571 | 0.038326022 | 0.587303939 |
| pcaec322.putrescine          | -0.017038136 | 0.031327275 | 0.587411185 |
| pcaec362.c2                  | -0.042660784 | 0.07845603  | 0.587494501 |
| pcaac361.lysopcac204         | -0.008906326 | 0.016380866 | 0.587529538 |
| methioninesulfoxide.pcaec361 | 0.003608259  | 0.006636878 | 0.587553419 |
| pcaac405.pcaec380            | 0.026534285  | 0.048836382 | 0.587785388 |
| arginine.lysopcac181         | -0.027465046 | 0.050552107 | 0.587805004 |
| pcaac300.pcaac365            | -0.027732403 | 0.05104891  | 0.587839386 |
| smc202.pcaac404              | 0.004059666  | 0.007477029 | 0.58804524  |
| pcaac402.c14                 | 0.049631297  | 0.091429303 | 0.58812341  |
| smc202.glutamine             | -0.011186486 | 0.020609267 | 0.588156956 |
| c142.valine                  | -0.041375863 | 0.076242379 | 0.58822605  |
| lysopcac203.pcaec444         | 0.066284806  | 0.122168619 | 0.588308679 |
| pcaec423.pcaac321            | 0.012267105  | 0.022611007 | 0.588336265 |
| pcaec340.pcaec362            | -0.022573192 | 0.04161786  | 0.588429725 |
| pcaec421.h1                  | 0.002141312  | 0.003947915 | 0.58843067  |
| lysopcac161.tyrosine         | -0.032915983 | 0.060690413 | 0.588452462 |
| serotonin.alanine            | -0.007930445 | 0.014622706 | 0.588466962 |
| pcaec364.methioninesulfoxide | 0.005202982  | 0.009594006 | 0.588481919 |
| pcaac405.taurine             | 0.016253214  | 0.029970198 | 0.588484263 |
| histidine.pcaac420           | 0.031142943  | 0.057441494 | 0.588583528 |

|                            |              |             |             |
|----------------------------|--------------|-------------|-------------|
| c141.h1                    | -0.005695707 | 0.010508657 | 0.588698004 |
| smc241.methioninesulfoxide | 0.006612974  | 0.012201789 | 0.588721234 |
| lysopcac203.pcaec385       | -0.038855245 | 0.071700616 | 0.588761139 |
| pcaec363.smc202            | 0.037064339  | 0.068401023 | 0.588789517 |
| pcaac341.c0                | 0.000392449  | 0.000724433 | 0.588882572 |
| pcaac360.c182              | -0.019251368 | 0.035539554 | 0.588912979 |
| pcaac420.smc181            | -0.010428755 | 0.019253868 | 0.588943101 |
| pcaec361.acetylnithoine    | 0.025051958  | 0.046252084 | 0.588946621 |
| lysopcac281.c101           | -0.005959256 | 0.011005266 | 0.589048441 |
| pcaec380.pcaac381          | 0.026410849  | 0.048785647 | 0.589135192 |
| lysopcac203.lysopcac281    | -0.006942853 | 0.012824936 | 0.58914164  |
| pcaac383.lysopcac204       | -0.009017659 | 0.016659149 | 0.58917743  |
| lysine.pcaec401            | 0.015580654  | 0.028783614 | 0.589177962 |
| pcaec446.alanine           | -0.006447248 | 0.011911675 | 0.589211217 |
| c2.histidine               | -0.03731354  | 0.068939669 | 0.589214887 |
| smc161.pcaec444            | 0.059587208  | 0.11011244  | 0.589283925 |
| pcaec381.taurine           | 0.041337469  | 0.07639116  | 0.589297525 |
| pcaec420.pcaac424          | -0.007704733 | 0.014238625 | 0.589307122 |
| c101.threonine             | 0.014849084  | 0.027445859 | 0.589364272 |
| pcaec362.h1                | 0.000917939  | 0.001697096 | 0.589463182 |
| pcaec362.smc181            | -0.006755613 | 0.01249164  | 0.589516284 |
| c102.pcaac321              | -0.020840188 | 0.038545387 | 0.589615626 |
| pcaac402.pcaac322          | 0.049021874  | 0.090671274 | 0.589623352 |
| lysopcac170.h1             | -0.004842228 | 0.008957592 | 0.589680003 |
| pcaec342.lysopcac280       | -0.006922126 | 0.012805259 | 0.589682448 |
| alphaaminoadipicacid.c14   | -0.018025667 | 0.033348068 | 0.589708546 |
| pcaec343.smohe241          | -0.024845165 | 0.045967133 | 0.589730946 |
| smc180.pcaec321            | 0.023418684  | 0.043343742 | 0.589866467 |
| histidine.methionine       | 0.051807376  | 0.095886731 | 0.589869031 |
| pcaec403.valine            | -0.018258018 | 0.033793513 | 0.589879965 |
| pcaec424.smc241            | -0.010428414 | 0.019308267 | 0.59000427  |
| c142.c16                   | 0.023626884  | 0.043749935 | 0.590043561 |
| lysopcac182.smc260         | -0.021239441 | 0.039334643 | 0.590095864 |
| pcaac405.pcaec386          | 0.00615484   | 0.011401463 | 0.590191342 |
| glutamine.lysine           | -0.046420911 | 0.086003342 | 0.590240821 |
| c181.pcaec343              | -0.030285064 | 0.056111725 | 0.590260874 |
| smohc222.pcaac420          | -0.035039554 | 0.064934401 | 0.590338786 |
| pcaac362.isoleucine        | 0.015091312  | 0.027970568 | 0.590388367 |
| pcaac385.glycine           | 0.01741856   | 0.032288694 | 0.590443017 |
| pcaec425.histidine         | -0.049099698 | 0.091028728 | 0.5904955   |
| pcaac401.lysopcac204       | 0.053404132  | 0.099035506 | 0.59059496  |
| lysine.smc261              | 0.028512177  | 0.052879791 | 0.590631932 |
| pcaec402.lysopcac180       | 0.037567619  | 0.069682099 | 0.590673113 |

|                           |              |             |             |
|---------------------------|--------------|-------------|-------------|
| methionine.isoleucine     | 0.007916971  | 0.014685666 | 0.590696205 |
| pcaac386.isoleucine       | 0.01418508   | 0.026315677 | 0.590737353 |
| pcaac386.pcaec365         | -0.013557212 | 0.025151568 | 0.590747531 |
| pcaac281.pcaec386         | 0.008864881  | 0.016449466 | 0.59081944  |
| pcaac422.pcaac401         | -0.031333153 | 0.0581615   | 0.590949747 |
| pcaec422.pcaec382         | 0.008315939  | 0.015442264 | 0.591093317 |
| glycine.pcaac365          | -0.045169394 | 0.08387986  | 0.591105044 |
| h1.pcaac402               | -0.021756004 | 0.040407018 | 0.591159862 |
| pcaec385.pcaac343         | -0.014433882 | 0.026809705 | 0.591186487 |
| pcaac320.pcaec385         | -0.030337082 | 0.056354286 | 0.591224276 |
| pcaac425.lysopcac170      | -0.014810573 | 0.027514452 | 0.591254884 |
| pcaec405.lysopcac281      | 0.010406933  | 0.019333857 | 0.591260617 |
| pcaac365.threonine        | 0.022687721  | 0.042158224 | 0.591342248 |
| pcaac360.c16              | 0.018124371  | 0.033679364 | 0.591350367 |
| pcaac420.pcaec321         | 0.019984312  | 0.037146732 | 0.591461648 |
| pcaac380.pcaac404         | -0.005542438 | 0.010305814 | 0.591589626 |
| pcaec445.pcaec401         | 0.021539603  | 0.040060842 | 0.591675663 |
| pcaec446.pcaac322         | -0.033271151 | 0.06188765  | 0.591721517 |
| acetylmethionine.pcaac402 | 0.018820808  | 0.035009673 | 0.591733115 |
| creatinine.c141           | -0.01287288  | 0.023947825 | 0.591767694 |
| pcaac365.pcaac401         | 0.013815958  | 0.025705753 | 0.591817986 |
| isoleucine.lysopcac281    | -0.006137727 | 0.011420897 | 0.591854924 |
| c51dc.pcaec421            | 0.000792843  | 0.001475612 | 0.591933716 |
| pcaec340.pcaec446         | -0.025862133 | 0.048138933 | 0.591973733 |
| asparticacid.pcaac384     | 0.038891533  | 0.072416878 | 0.592103759 |
| smc161.serotonin          | -0.04671329  | 0.08699574  | 0.592165773 |
| lysine.spermidine         | -0.037973003 | 0.070723661 | 0.592193244 |
| pcaac401.pcaac380         | 0.035907006  | 0.06688223  | 0.592228811 |
| glutamicacid.alanine      | -0.026047611 | 0.048517706 | 0.592229496 |
| h1.lysopcac160            | 0.02835205   | 0.052812077 | 0.592243483 |
| pcaec301.pcaac365         | -0.027318756 | 0.05089026  | 0.592264745 |
| smc161.pcaac383           | 0.001734823  | 0.003231861 | 0.592284863 |
| pcaac281.arginine         | 0.032024272  | 0.059661357 | 0.5922989   |
| smc261.smc181             | 0.007459262  | 0.013897145 | 0.592312396 |
| pcaec362.pcaec382         | -0.00774801  | 0.014436267 | 0.592342198 |
| ornithine.pcaac341        | -0.001817872 | 0.003387525 | 0.592388574 |
| pcaec384.pcaec301         | 0.041641986  | 0.07762247  | 0.592505075 |
| pcaec385.pcaec386         | 0.005161391  | 0.009621756 | 0.59253193  |
| creatinine.pcaac404       | 0.002606358  | 0.004859441 | 0.592586988 |
| asparticacid.spermidine   | 0.037674769  | 0.070243821 | 0.592591458 |
| c5.glutamicacid           | -0.03587022  | 0.06688676  | 0.592632817 |
| lysopcac181.c8            | -0.034396733 | 0.064143075 | 0.592655331 |
| c142.histidine            | -0.031933727 | 0.059564076 | 0.592742308 |

|                                |              |             |             |
|--------------------------------|--------------|-------------|-------------|
| smohc241.smc261                | 0.01711606   | 0.031930236 | 0.59279634  |
| pcaec401.pcaac383              | -0.004515057 | 0.008423132 | 0.592806557 |
| pcaac385.smohc241              | 0.032102478  | 0.059897531 | 0.592857633 |
| smc181.threonine               | -0.024754547 | 0.046187983 | 0.592860733 |
| pcaac381.serine                | 0.030628091  | 0.057157447 | 0.592927826 |
| smc180.pcaec342                | -0.054853056 | 0.102374944 | 0.592961805 |
| pcaac406.pcaec362              | -0.009290185 | 0.017340085 | 0.592990705 |
| pcaec380.putrescine            | -0.036724718 | 0.068582253 | 0.593183239 |
| lysopcac160.kynurenine         | 0.0072138    | 0.013478235 | 0.593366488 |
| leucine.pcaac320               | -0.069662009 | 0.130172394 | 0.593412376 |
| pcaec424.isoleucine            | 0.008463567  | 0.015820132 | 0.593526022 |
| asparagine.smc260              | -0.012066353 | 0.022554625 | 0.593528524 |
| pcaac420.c3                    | -0.016343014 | 0.030549576 | 0.593539936 |
| smc240.taurine                 | 0.023435318  | 0.04381061  | 0.593570022 |
| prolinr.pcaac300               | -0.031679704 | 0.059224983 | 0.593583089 |
| c14.pcaec386                   | 0.001722682  | 0.00322062  | 0.593591948 |
| pcaec424.c2                    | -0.038508549 | 0.071993508 | 0.593593576 |
| pcaec405.pcaac386              | 0.007534242  | 0.014089764 | 0.593702257 |
| pcaac381.c16                   | 0.014028618  | 0.026242865 | 0.593814517 |
| acetylmithoine.pcaac421        | 0.007826078  | 0.01464294  | 0.593889022 |
| c181.transhydroxyproline       | 0.012965498  | 0.024260389 | 0.593909778 |
| serine.lysopcac204             | -0.016809229 | 0.031454361 | 0.593930581 |
| smc160.c181                    | -0.004618768 | 0.008643036 | 0.593936642 |
| lysopcac280.valine             | -0.019079237 | 0.035705942 | 0.59396998  |
| lysopcac280.c2                 | 0.058072495  | 0.108683939 | 0.593983053 |
| pcaac426.phenylalanine         | -0.018913175 | 0.035398577 | 0.594005525 |
| lysopcac170.pcaec363           | 0.009901907  | 0.01853318  | 0.594013794 |
| asymmetricdimethylarginine.c10 | 0.012539116  | 0.023474724 | 0.594100747 |
| lysine.asparticacid            | -0.023088449 | 0.043227544 | 0.594128092 |
| pcaac422.c162                  | -0.038318679 | 0.071752535 | 0.594179787 |
| lysopcac204.pcaec401           | -0.026070334 | 0.048830601 | 0.594280532 |
| c5.smc261                      | -0.043161679 | 0.080873323 | 0.594417496 |
| alphaaminoadipicacid.lysopcac2 | 0.029954828  | 0.056128551 | 0.594426012 |
| h1.glutamine                   | 0.004159511  | 0.007794155 | 0.594434324 |
| c182.lysopcac281               | 0.004400706  | 0.00824894  | 0.594560636 |
| glycine.smohc222               | 0.003166561  | 0.005936634 | 0.594625652 |
| pcaec406.c51dc                 | -0.071687952 | 0.13440367  | 0.594636238 |
| lysopcac182.pcaac404           | -0.004910854 | 0.00920904  | 0.594714557 |
| pcaac322.pcaec421              | -0.003768654 | 0.007068491 | 0.594784975 |
| arginine.pcaac323              | -0.076048494 | 0.142662698 | 0.594852238 |
| pcaec421.lysopcac181           | -0.039807639 | 0.074694135 | 0.594937191 |
| pcaac342.pcaec421              | -0.004961799 | 0.009310889 | 0.594964216 |
| pcaec301.pcaec360              | 0.00269356   | 0.005054933 | 0.594995323 |



|                                 |              |             |             |
|---------------------------------|--------------|-------------|-------------|
| pcaec381.pcaac424               | 0.031744408  | 0.059576966 | 0.595014328 |
| asymmetricdimethylarginine.puti | -0.029529662 | 0.055458792 | 0.595269057 |
| pcaac362.c4                     | -0.007249372 | 0.013618776 | 0.595375501 |
| c5.lysopcac180                  | 0.057725723  | 0.108454322 | 0.5954092   |
| pcaec422.isoleucine             | 0.012674245  | 0.023812439 | 0.595412827 |
| lysopcac203.c162                | 0.050390118  | 0.09467433  | 0.595417137 |
| pcaec404.pcaec322               | 0.029199533  | 0.054876804 | 0.595523801 |
| pcaec301.c141                   | -0.021283162 | 0.040004748 | 0.59557667  |
| pcaac342.pcaec343               | 0.051945023  | 0.097647623 | 0.595612507 |
| pcaec363.pcaac420               | 0.028958143  | 0.054438548 | 0.595627821 |
| pcaac424.h1                     | 0.001873626  | 0.003523482 | 0.595757484 |
| pcaec401.pcaec403               | 0.032856751  | 0.06179807  | 0.595809237 |
| pcaac403.pcaac384               | 0.022442446  | 0.042210527 | 0.595809478 |
| glutamicacid.pcaec301           | 0.018804948  | 0.035369593 | 0.595815704 |
| pcaec425.c51dc                  | -0.069149274 | 0.130072778 | 0.595850251 |
| c4.acetylornithoine             | 0.039957825  | 0.075169953 | 0.595887166 |
| pcaec301.pcaec382               | -0.006006739 | 0.011300407 | 0.59589806  |
| pcaac281.methionine             | -0.02012169  | 0.037856134 | 0.595911985 |
| pcaec421.methioninesulfoxide    | 0.009378523  | 0.017645288 | 0.595931024 |
| pcaec385.glycine                | 0.029201321  | 0.054942475 | 0.595940678 |
| pcaac422.smohc161               | 0.00909375   | 0.017113328 | 0.596013149 |
| c3.threonine                    | -0.018260558 | 0.034367741 | 0.596051621 |
| pcaec403.smohc141               | -0.015824832 | 0.029788219 | 0.596109509 |
| c51.pcaac381                    | 0.029348208  | 0.055258337 | 0.596203147 |
| prolinr.lysopcac160             | 0.017014482  | 0.032036039 | 0.596206417 |
| smc161.smc180                   | -0.008621767 | 0.016236619 | 0.596273364 |
| lysopcac180.pcaec446            | -0.021710637 | 0.040886618 | 0.596281231 |
| pcaac341.pcaac384               | -0.033011063 | 0.06217866  | 0.596343092 |
| pcaac421.pcaec385               | -0.034553135 | 0.065088045 | 0.596370066 |
| pcaec300.pcaec421               | 0.001997914  | 0.003763507 | 0.596372011 |
| pcaac406.leucine                | -0.003968103 | 0.007475314 | 0.596397673 |
| arginine.c141oh                 | -0.056477679 | 0.106411557 | 0.596453011 |
| pcaec403.serotonin              | -0.062441174 | 0.117648538 | 0.596455985 |
| smc181.lysopcac280              | 0.007989106  | 0.01505362  | 0.596479047 |
| methionine.ornithine            | 0.027759058  | 0.052315897 | 0.596551833 |
| pcaec420.ornithine              | 0.015383997  | 0.028994337 | 0.596564538 |
| pcaac364.pcaec423               | -0.007531775 | 0.014196632 | 0.596601693 |
| pcaec381.phenylalanine          | 0.049696345  | 0.093682747 | 0.596641525 |
| c102.isoleucine                 | -0.008140225 | 0.015356617 | 0.596915009 |
| pcaec401.c51dc                  | 0.082675061  | 0.155982574 | 0.596950803 |
| smc160.pcaec444                 | -0.060502871 | 0.114161783 | 0.596987255 |
| alphaaminoadipicacid.transhydrc | 0.01600838   | 0.030206406 | 0.5969931   |
| leucine.methionine              | -0.022276263 | 0.042041183 | 0.597061376 |

|                              |              |             |             |
|------------------------------|--------------|-------------|-------------|
| pcaec420.pcaac404            | -0.003606733 | 0.00680957  | 0.597207402 |
| pcaac365.pcaec420            | -0.017770862 | 0.033552491 | 0.597216322 |
| smohc241.c51dc               | -0.065125516 | 0.122980193 | 0.597273428 |
| pcaec405.smc261              | -0.04823161  | 0.091083783 | 0.597294772 |
| pcaec404.pcaec343            | 0.035198268  | 0.066474109 | 0.597313269 |
| phenylalanine.pcaec402       | -0.034983246 | 0.06607158  | 0.597332958 |
| lysopcac280.pcaac384         | 0.022759275  | 0.042986252 | 0.597346933 |
| asparagine.pcaec343          | -0.040408677 | 0.076326911 | 0.597373829 |
| pcaac361.c4                  | -0.008074736 | 0.015253427 | 0.597404219 |
| pcaec383.methioninesulfoxide | 0.012712665  | 0.024016227 | 0.597428747 |
| pcaec422.pcaec404            | 0.010859773  | 0.020516895 | 0.597447893 |
| pcaac300.ornithine           | 0.014380856  | 0.027170169 | 0.597461972 |
| pcaec383.h1                  | 0.001296247  | 0.002449173 | 0.597482386 |
| pcaac360.pcaac404            | -0.010081364 | 0.019053963 | 0.597595516 |
| pcaac425.phenylalanine       | -0.021743073 | 0.041095376 | 0.597600578 |
| pcaac364.pcaac406            | -0.020842108 | 0.039394702 | 0.597620914 |
| lysopcac170.pcaac401         | -0.002013997 | 0.003807389 | 0.597681729 |
| c2.c51dc                     | -0.058463674 | 0.110555981 | 0.597789411 |
| pcaec301.pcaec420            | 0.011415087  | 0.021591639 | 0.597882294 |
| pcaac366.pcaac406            | -0.029311611 | 0.055447025 | 0.597909384 |
| smc161.pcaac361              | 0.03050319   | 0.057711007 | 0.597972404 |
| lysine.histidine             | 0.069285014  | 0.1310881   | 0.597981312 |
| c141oh.pcaac240              | -0.007078085 | 0.013392442 | 0.597998164 |
| c182.leucine                 | 0.011281702  | 0.021348475 | 0.598038795 |
| smc241.pcaec364              | -0.011771109 | 0.022277598 | 0.598088287 |
| h1.smohc221                  | -0.034454289 | 0.065213804 | 0.598126386 |
| c141.smc240                  | -0.018066168 | 0.034211682 | 0.598304962 |
| pcaec443.lysopcac181         | -0.034944806 | 0.066176858 | 0.598317685 |
| smc181.acetylornithoine      | -0.013694937 | 0.025935973 | 0.598333684 |
| smc260.pcaac361              | 0.022552641  | 0.042717011 | 0.598384965 |
| smohc161.pcaac320            | 0.027066025  | 0.051267809 | 0.598399117 |
| smc240.smc181                | -0.007852091 | 0.014874493 | 0.598429888 |
| pcaac321.c16                 | 0.016375795  | 0.031035323 | 0.598595643 |
| pcaac323.pcaec341            | 0.028738605  | 0.054485539 | 0.598731634 |
| pcaac401.isoleucine          | 0.010243825  | 0.019421691 | 0.598739455 |
| pcaac424.pcaac426            | 0.060379069  | 0.114503966 | 0.598831316 |
| pcaac425.pcaac323            | 0.031676257  | 0.060079947 | 0.598883081 |
| c182.c141oh                  | 0.062600129  | 0.118741792 | 0.598910561 |
| pcaac366.spermidine          | -0.037763022 | 0.0716348   | 0.598934888 |
| pcaec446.pcaec401            | 0.021537252  | 0.040859198 | 0.598970394 |
| smohc222.pcaec422            | 0.023977938  | 0.04549016  | 0.598975498 |
| pcaac281.c3                  | -0.013504689 | 0.025624022 | 0.599023473 |
| lysine.lysopcac203           | 0.01612686   | 0.030600053 | 0.599031595 |

|                         |              |             |             |
|-------------------------|--------------|-------------|-------------|
| c12.pcaac404            | 0.001793516  | 0.003403424 | 0.599063945 |
| pcaec341.pcaec321       | -0.01489273  | 0.028261785 | 0.599076049 |
| c16.h1                  | -0.002150419 | 0.004081642 | 0.599148756 |
| glutamine.pcaac381      | -0.012748695 | 0.024201701 | 0.599206215 |
| creatinine.smohc241     | 0.046150373  | 0.087614837 | 0.599224917 |
| c141.pcaec420           | -0.01099436  | 0.020873483 | 0.599243852 |
| pcaec402.pcaec385       | -0.037637411 | 0.071466701 | 0.599293425 |
| smc181.lysine           | 0.030510921  | 0.057937782 | 0.599312367 |
| lysopcac203.pcaac404    | -0.003520922 | 0.006687089 | 0.599374632 |
| pcaec361.smohc161       | -0.011891041 | 0.022595683 | 0.599563477 |
| pcaec360.pcaac361       | -0.031037938 | 0.05898237  | 0.599583449 |
| pcaec363.pcaec386       | 0.004617959  | 0.0087764   | 0.599614458 |
| pcaec383.c5             | -0.013800422 | 0.026238449 | 0.599765102 |
| lysopcac160.pcaec423    | 0.016876107  | 0.032089825 | 0.599806465 |
| smohc221.pcaec365       | 0.018223436  | 0.034654614 | 0.599836448 |
| pcaac404.pcaac240       | 0.007970986  | 0.015160057 | 0.599885109 |
| pcaec406.leucine        | -0.00383283  | 0.007289845 | 0.599893495 |
| arginine.pcaec420       | -0.013200955 | 0.025108551 | 0.599908179 |
| pcaec382.c2             | 0.074954678  | 0.142568567 | 0.599915515 |
| pcaac383.arginine       | 0.026910701  | 0.051194445 | 0.599976572 |
| kynurenine.h1           | -0.00115211  | 0.00219197  | 0.600012663 |
| pcaac406.pcaec406       | 0.037345438  | 0.071062639 | 0.600065444 |
| pcaac365.pcaac240       | -0.01490562  | 0.028364807 | 0.600087257 |
| lysopcac161.pcaac381    | 0.012848047  | 0.024455704 | 0.600182256 |
| pcaac385.c0             | 0.00027572   | 0.000524924 | 0.600254182 |
| pcaac344.pcaac421       | 0.037481611  | 0.071362681 | 0.600274348 |
| pcaac402.pcaac384       | 0.021419675  | 0.040787576 | 0.600326417 |
| c5.isoleucine           | -0.01657324  | 0.031559904 | 0.600337519 |
| pcaac342.pcaac420       | -0.035569667 | 0.067745512 | 0.600398265 |
| c0.lysopcac161          | 0.04124808   | 0.078572761 | 0.600454874 |
| c4.pcaec321             | -0.017785944 | 0.033892003 | 0.600582266 |
| pcaac365.c5             | 0.005453709  | 0.010394042 | 0.600642797 |
| lysopcac203.pcaec386    | 0.00482098   | 0.009188566 | 0.600659378 |
| asparagine.lysopcac181  | 0.021502764  | 0.040994683 | 0.600760641 |
| c16.pcaec360            | -0.007317094 | 0.013951591 | 0.600804057 |
| acetylmithoine.pcaec360 | 0.005419445  | 0.010334369 | 0.600840947 |
| c0.spermidine           | -0.03791293  | 0.072308535 | 0.600902145 |
| pcaec403.pcaec383       | -0.174825535 | 0.333463547 | 0.600936712 |
| smohc221.pcaec446       | -0.012656891 | 0.024143877 | 0.600967257 |
| pcaec401.pcaec360       | 0.002617077  | 0.004993089 | 0.601028297 |
| smohc221.pcaec380       | 0.024374655  | 0.046509252 | 0.601068455 |
| c10.smc261              | 0.036546317  | 0.069796481 | 0.601393994 |
| smohc161.pcaac404       | -0.003389752 | 0.006474035 | 0.601408434 |

|                            |              |             |             |
|----------------------------|--------------|-------------|-------------|
| pcaec423.pcaac365          | 0.040025986  | 0.076445748 | 0.601411875 |
| pcaac383.pcaac363          | -0.009739518 | 0.018617063 | 0.601714935 |
| c102.lysine                | 0.020682101  | 0.039534532 | 0.601721827 |
| pcaac386.smc260            | -0.022411725 | 0.042860312 | 0.601887399 |
| pcaec340.pcaac386          | 0.004186818  | 0.0080092   | 0.601991894 |
| ornithine.pcaac426         | 0.037570829  | 0.07187699  | 0.602020297 |
| pcaec421.isoleucine        | 0.008371763  | 0.016017452 | 0.602051542 |
| pcaec341.arginine          | -0.024936867 | 0.047711217 | 0.602053291 |
| pcaec445.methionine        | -0.015284375 | 0.029250986 | 0.602148698 |
| c162.pcaac383              | 0.042000076  | 0.080381298 | 0.602158818 |
| pcaec401.lysopcac181       | -0.032536744 | 0.06227124  | 0.602165911 |
| pcaac300.smc241            | -0.048893148 | 0.093578433 | 0.60217789  |
| pcaec423.c51               | 0.055389236  | 0.106016688 | 0.602195503 |
| pcaec380.pcaec401          | 0.034545306  | 0.066126239 | 0.602225507 |
| pcaec443.smc202            | -0.041656955 | 0.07974121  | 0.602234284 |
| glutamine.pcaac363         | 0.013998932  | 0.026797664 | 0.602239905 |
| pcaec321.acetyloroithoine  | 0.012201555  | 0.023358726 | 0.602266574 |
| pcaec322.lysopcac170       | -0.006634343 | 0.012702218 | 0.602306371 |
| pcaac383.pcaac384          | -0.020240747 | 0.038755134 | 0.602323975 |
| pcaec380.c101              | -0.014611684 | 0.027977376 | 0.602327304 |
| pcaec384.leucine           | -0.004012491 | 0.007682918 | 0.602331878 |
| c5.pcaac240                | -0.016487548 | 0.031570114 | 0.602338482 |
| c16.pcaac386               | 0.004251538  | 0.008140958 | 0.602346301 |
| kynurenine.pcaac361        | 0.020271152  | 0.038816518 | 0.602353565 |
| smohc241.phenylalanine     | 0.034043964  | 0.065198536 | 0.6024033   |
| pcaac380.pcaac402          | 0.027307548  | 0.052298137 | 0.602408137 |
| pcaac383.spermidine        | -0.037371758 | 0.071593637 | 0.602514464 |
| pcaac364.pcaac361          | -0.013116957 | 0.025129648 | 0.602533179 |
| pcaec383.valine            | -0.015822894 | 0.030313881 | 0.602535089 |
| lysopcac204.pcaac381       | -0.01475224  | 0.028263959 | 0.602551289 |
| pcaec383.pcaac384          | 0.021826784  | 0.041822085 | 0.602585434 |
| histidine.pcaac363         | -0.009068557 | 0.017376801 | 0.602598534 |
| c182.taurine               | -0.024121494 | 0.046233762 | 0.60270149  |
| lysopcac170.c102           | 0.019985495  | 0.038308935 | 0.602726642 |
| serotonin.acetyloroithoine | 0.012222855  | 0.023429435 | 0.602729967 |
| glutamine.pcaac420         | -0.028411198 | 0.054470259 | 0.602797314 |
| smc261.alanine             | -0.008529533 | 0.016353596 | 0.602812431 |
| c12.alanine                | -0.045418103 | 0.087089875 | 0.602854695 |
| pcaec423.c5                | 0.013774165  | 0.026419625 | 0.602957005 |
| pcaec445.c141oh            | 0.045837851  | 0.087927923 | 0.602991365 |
| pcaec361.pcaac386          | 0.00393627   | 0.007550816 | 0.602996783 |
| pcaec404.asparticacid      | 0.034430947  | 0.0660656   | 0.603094625 |
| pcaec386.ornithine         | 0.012529128  | 0.024040718 | 0.603094773 |

|                          |              |             |             |
|--------------------------|--------------|-------------|-------------|
| pcaec443.h1              | 0.001453212  | 0.002788695 | 0.60313262  |
| c101.pcaac421            | 0.025606377  | 0.049142094 | 0.603160569 |
| c162.pcaec342            | 0.033172135  | 0.063678186 | 0.603253697 |
| pcaec361.pcaac420        | -0.075005513 | 0.143984371 | 0.603257787 |
| c141.pcaac363            | -0.007046072 | 0.013527136 | 0.603288298 |
| c141.pcaec422            | -0.013949368 | 0.026781449 | 0.603305591 |
| pcaec363.smc240          | -0.014199445 | 0.027269718 | 0.603413688 |
| leucine.pcaac365         | -0.022082827 | 0.042410868 | 0.603424707 |
| smc240.pcaac420          | 0.029225464  | 0.056130333 | 0.603436123 |
| pcaac366.pcaac404        | -0.004875013 | 0.009363193 | 0.603446147 |
| pcaac322.pcaec402        | -0.017250432 | 0.033138238 | 0.603513804 |
| pcaec386.pcaac344        | 0.044465071  | 0.085423904 | 0.603539602 |
| lysopcac181.pcaac406     | -0.018933937 | 0.036379429 | 0.603585004 |
| c141.threonine           | 0.013821698  | 0.026561702 | 0.603651276 |
| pcaac362.acetylnithoine  | 0.017353147  | 0.033352342 | 0.60369589  |
| c16.pcaac406             | 0.027320284  | 0.052513519 | 0.603727377 |
| phenylalanine.alanine    | 0.011842612  | 0.02276954  | 0.603827976 |
| pcaec445.lysopcac170     | -0.007664472 | 0.014736452 | 0.603831273 |
| smohc141.lysopcac170     | -0.008106697 | 0.015589885 | 0.603904756 |
| pcaec363.pcaac384        | 0.034412743  | 0.066184319 | 0.603935403 |
| c3.pcaec401              | -0.030826258 | 0.059292091 | 0.603968813 |
| h1.threonine             | 0.015479417  | 0.029778523 | 0.604029209 |
| pcaac384.smohc222        | 0.003646647  | 0.007015566 | 0.604046253 |
| h1.c162                  | 0.062193929  | 0.119675587 | 0.604119923 |
| pcaec322.pcaec382        | 0.028049459  | 0.053983955 | 0.604188669 |
| pcaec425.pcaec422        | 0.020195437  | 0.03887717  | 0.604272827 |
| pcaac381.pcaac240        | -0.013584244 | 0.026155599 | 0.604345845 |
| c162.methioninesulfoxide | 0.007726536  | 0.014879953 | 0.604418628 |
| pcaac360.pcaec405        | 0.046166731  | 0.08891885  | 0.60445852  |
| arginine.pcaac426        | -0.031029385 | 0.059772072 | 0.604508754 |
| pcaac386.pcaec401        | -0.018543136 | 0.03572494  | 0.604561283 |
| histidine.acetylnithoine | 0.012041264  | 0.023200339 | 0.604589466 |
| pcaec425.isoleucine      | 0.006909561  | 0.013314209 | 0.604624929 |
| pcaac343.acetylnithoine  | 0.005984075  | 0.011532905 | 0.604688741 |
| pcaac405.c2              | 0.042606724  | 0.082138165 | 0.604792734 |
| c3.c4                    | 0.007126187  | 0.013739594 | 0.604834147 |
| pcaec402.pcaac425        | 0.057714308  | 0.11128747  | 0.604872421 |
| smc261.pcaec443          | 0.035138766  | 0.067760734 | 0.604896356 |
| smohc141.lysopcac203     | 0.007189906  | 0.013864956 | 0.604899403 |
| smc202.pcaec443          | 0.041894804  | 0.080790216 | 0.604902186 |
| pcaac386.pcaec404        | -0.006252867 | 0.012058425 | 0.604912793 |
| pcaec362.pcaec380        | -0.01926382  | 0.037157479 | 0.604989589 |
| smc161.pcaec360          | -0.003277409 | 0.006323686 | 0.605102365 |

|                                |              |             |             |
|--------------------------------|--------------|-------------|-------------|
| pcaac363.acetylornithoine      | 0.007046232  | 0.013600477 | 0.605233152 |
| smohc222.methioninesulfoxide   | 0.005530147  | 0.010676271 | 0.605304268 |
| pcaac384.pcaac383              | 0.001872555  | 0.00361557  | 0.605353555 |
| pcaac420.prolinr               | 0.014620928  | 0.028233638 | 0.605394745 |
| pcaec421.pcaec383              | -0.100716991 | 0.194638664 | 0.605672208 |
| c51dc.pcaac384                 | 0.02501152   | 0.048340567 | 0.60570976  |
| isoleucine.pcaac384            | 0.035870697  | 0.069340096 | 0.605770265 |
| pcaec384.methioninesulfoxide   | 0.007190344  | 0.013899453 | 0.605773112 |
| pcaac424.pcaec444              | -0.054374505 | 0.1051374   | 0.605867512 |
| lysopcac170.lysopcac280        | 0.00456651   | 0.00883127  | 0.60593124  |
| smc260.pcaec321                | 0.024744903  | 0.047856774 | 0.605946871 |
| pcaac323.pcaec364              | -0.010649315 | 0.020600043 | 0.60602048  |
| serotonin.pcaec444             | 0.039195461  | 0.0758211   | 0.606026972 |
| asymmetricdimethylarginine.pca | 0.006764696  | 0.013090942 | 0.606166428 |
| prolinr.pcaec361               | -0.007749412 | 0.014999222 | 0.606230551 |
| creatinine.smc160              | -0.043614045 | 0.08441796  | 0.60623758  |
| pcaac384.pcaac364              | -0.047629705 | 0.092194811 | 0.60625423  |
| pcaac424.isoleucine            | 0.009664257  | 0.018714271 | 0.606399871 |
| pcaec385.pcaac380              | 0.041280738  | 0.079939644 | 0.606408417 |
| pcaac366.tyrosine              | 0.032197595  | 0.062353474 | 0.606427021 |
| pcaac401.methioninesulfoxide   | 0.016393449  | 0.031747481 | 0.606428443 |
| c3.smc261                      | 0.027473364  | 0.053208323 | 0.606452285 |
| pcaec342.pcaac322              | -0.033915851 | 0.06569617  | 0.606509907 |
| c3.pcaac322                    | 0.022443156  | 0.04348126  | 0.606576848 |
| arginine.pcaec403              | 0.013709033  | 0.026563861 | 0.606631629 |
| smohc241.ornithine             | 0.014465537  | 0.028036005 | 0.606712066 |
| smohc141.kynurenine            | -0.002751237 | 0.005333225 | 0.606778563 |
| pcaec365.c142                  | 0.021231778  | 0.041160105 | 0.606801886 |
| pcaec444.pcaac300              | 0.033002382  | 0.06398293  | 0.606825661 |
| pcaac321.pcaac240              | 0.009179521  | 0.017799414 | 0.606880963 |
| c182.c141                      | -0.015920184 | 0.030869818 | 0.606881227 |
| c0.pcaac281                    | -0.000756123 | 0.00146639  | 0.606940268 |
| lysopcac140.spermidine         | -0.042255213 | 0.081993544 | 0.607140405 |
| c142.pcaac380                  | -0.020947632 | 0.040650671 | 0.607168042 |
| lysine.smc260                  | -0.006352918 | 0.012329173 | 0.607191095 |
| arginine.pcaac404              | -0.004826998 | 0.009367897 | 0.607194684 |
| pcaac383.c162                  | 0.040701453  | 0.079005407 | 0.607262378 |
| c2.smc180                      | 0.00322591   | 0.006263868 | 0.607380909 |
| lysopcac281.spermidine         | -0.03640985  | 0.070707101 | 0.607425407 |
| leucine.pcaec445               | -0.022045093 | 0.042813108 | 0.607442485 |
| asparagine.histidine           | -0.040779939 | 0.079199155 | 0.607450061 |
| smc260.pcaec363                | -0.013707557 | 0.026624608 | 0.607490697 |
| citruline.pcaac403             | 0.008960842  | 0.017414884 | 0.607696078 |

|                            |              |             |             |
|----------------------------|--------------|-------------|-------------|
| c2.smc241                  | 0.037332287  | 0.072571933 | 0.607788839 |
| pcaac360.pcaec382          | 0.009039698  | 0.017573247 | 0.607800389 |
| lysopcac203.c16            | 0.03642432   | 0.070812559 | 0.607817519 |
| c141.valine                | 0.03823582   | 0.074335747 | 0.607824507 |
| pcaac421.c101              | 0.032553096  | 0.063302587 | 0.607908603 |
| c141oh.pcaec386            | 0.001478134  | 0.002874485 | 0.607922737 |
| lysopcac170.threonine      | -0.02043565  | 0.039741351 | 0.607929258 |
| pcaec401.spermidine        | -0.035861736 | 0.069741435 | 0.607933716 |
| smohc241.pcaec402          | -0.025084924 | 0.048783956 | 0.607937555 |
| lysopcac170.c101           | -0.005349326 | 0.010403636 | 0.607955599 |
| pcaec342.c162              | 0.052644578  | 0.102424794 | 0.608092084 |
| h1.pcaac240                | -0.010291942 | 0.02003069  | 0.608213479 |
| kynurenine.pcaac426        | 0.030618037  | 0.059592748 | 0.608227913 |
| lysopcac160.arginine       | 0.035697286  | 0.069492579 | 0.608299823 |
| pcaec386.smc161            | -0.047715114 | 0.092908403 | 0.608378836 |
| smc261.lysopcac181         | 0.03404345   | 0.066288146 | 0.608381544 |
| pcaec342.smc240            | -0.015643933 | 0.030464583 | 0.608420291 |
| glycine.pcaec446           | 0.031978236  | 0.062288549 | 0.608506403 |
| c182.pcaac320              | -0.022796145 | 0.044403303 | 0.608506524 |
| c141.smc180                | -0.007753904 | 0.015103905 | 0.60851886  |
| asparagine.asparticacid    | 0.022491835  | 0.043815339 | 0.608545618 |
| pcaec406.pcaac281          | 0.001023918  | 0.001995    | 0.608608781 |
| pcaec423.pcaec322          | 0.044119754  | 0.085967458 | 0.608627828 |
| pcaac300.serine            | -0.022950372 | 0.044723952 | 0.608668579 |
| pcaec406.pcaac381          | -0.014332373 | 0.027932589 | 0.608703724 |
| smc260.lysopcac170         | -0.00900859  | 0.017557351 | 0.608711215 |
| pcaec342.pcaac384          | 0.027549789  | 0.053704771 | 0.608787383 |
| pcaac404.acetylnithoine    | 0.003737949  | 0.007287106 | 0.608809678 |
| pcaac362.pcaac322          | 0.041875417  | 0.081650571 | 0.608874308 |
| c182.asparagine            | -0.006375233 | 0.012433607 | 0.608957505 |
| c8.lysopcac161             | 0.041539733  | 0.081031919 | 0.60903276  |
| smohc241.taurine           | 0.027071978  | 0.052810612 | 0.60904     |
| pcaac320.prolinr           | 0.025384486  | 0.049529317 | 0.609116389 |
| pcaec343.pcaec401          | 0.033409384  | 0.065204547 | 0.609211445 |
| pcaec420.pcaec380          | -0.03566823  | 0.069613659 | 0.609214326 |
| arginine.pcaac386          | 0.004561102  | 0.008903857 | 0.60929297  |
| pcaec362.pcaac426          | -0.03765153  | 0.073501293 | 0.6092962   |
| pcaac403.pcaec321          | 0.027976059  | 0.054615223 | 0.609308404 |
| pcaac404.pcaac364          | -0.035450656 | 0.069208027 | 0.60931253  |
| lysopcac280.h1             | 0.000869954  | 0.001698364 | 0.609314461 |
| pcaac402.taurine           | 0.041832623  | 0.081672107 | 0.609334316 |
| lysopcac280.acetylnithoine | 0.009185748  | 0.017934579 | 0.609349137 |
| pcaec301.putrescine        | -0.01798148  | 0.03510852  | 0.609357715 |

|                               |              |             |             |
|-------------------------------|--------------|-------------|-------------|
| acetylmethionine.threonine    | 0.015754596  | 0.030761656 | 0.609370357 |
| c181.pcaec386                 | 0.003223501  | 0.006294174 | 0.609377385 |
| lysopcac160.lysopcac161       | -0.050553291 | 0.098717707 | 0.609405898 |
| pcaac360.pcaec443             | -0.039616725 | 0.077397091 | 0.609570838 |
| putrescine.leucine            | -0.004121878 | 0.008053048 | 0.609586563 |
| lysopcac280.pcaac321          | 0.010279066  | 0.020088302 | 0.609688882 |
| pcaac425.pcaec360             | -0.002699737 | 0.005276928 | 0.609746536 |
| c101.pcaec342                 | 0.032850907  | 0.064212889 | 0.609759026 |
| c18.serine                    | 0.026233935  | 0.051285536 | 0.609805593 |
| lysopcac280.pcaac424          | 0.024952436  | 0.048783766 | 0.609831003 |
| pcaec386.pcaac386             | 0.011054399  | 0.021615605 | 0.609888464 |
| smc202.pcaac323               | 0.082297521  | 0.16093879  | 0.609922773 |
| serotonin.transhydroxyproline | 0.018544605  | 0.036277332 | 0.610040968 |
| pcaec423.glycine              | 0.014670679  | 0.028701493 | 0.610070964 |
| lysopcac180.threonine         | -0.016431567 | 0.032146854 | 0.610075276 |
| pcaac425.pcaac386             | 0.008375264  | 0.016385465 | 0.610075902 |
| pcaec425.pcaac401             | -0.001454501 | 0.002845845 | 0.610106385 |
| pcaac321.c4                   | -0.012092799 | 0.023667407 | 0.610210319 |
| pcaac383.pcaec380             | 0.021185555  | 0.041464882 | 0.610224079 |
| pcaec445.pcaac343             | -0.012529886 | 0.024524838 | 0.610239225 |
| pcaec364.pcaec402             | 0.024726944  | 0.048408755 | 0.610316816 |
| smc181.pcaec342               | -0.051004023 | 0.099853098 | 0.61031981  |
| pcaac401.pcaec446             | 0.04490707   | 0.087922437 | 0.610342715 |
| pcaac424.pcaec386             | 0.007733594  | 0.015143561 | 0.610393351 |
| smc261.pcaac385               | -0.006611403 | 0.012946634 | 0.610407004 |
| smc202.c8                     | -0.023173406 | 0.045380536 | 0.610420543 |
| lysopcac182.glutamicacid      | 0.027199466  | 0.053265838 | 0.610427638 |
| lysopcac170.pcaec385          | -0.017534777 | 0.034340642 | 0.610443884 |
| lysopcac182.tyrosine          | -0.034023484 | 0.066634738 | 0.610455174 |
| pcaac401.pcaec301             | -0.049194848 | 0.096348609 | 0.610458385 |
| pcaac281.citruline            | 0.045326425  | 0.08877887  | 0.610484924 |
| pcaec341.methioninesulfoxide  | 0.00876392   | 0.017167672 | 0.61052999  |
| pcaac381.pcaac426             | 0.054196925  | 0.106194049 | 0.610622362 |
| pcaac426.pcaec360             | -0.00260434  | 0.005103992 | 0.610693529 |
| c51.lysopcac170               | -0.004987597 | 0.009777925 | 0.610810969 |
| lysine.c3                     | -0.020947628 | 0.041085035 | 0.610969731 |
| lysopcac203.pcaec363          | 0.01587152   | 0.031134049 | 0.611025726 |
| c51.methioninesulfoxide       | 0.008534836  | 0.016742661 | 0.611035756 |
| c3.pcaac363                   | 0.00780539   | 0.01531251  | 0.611054207 |
| glutamine.pcaac405            | 0.038545432  | 0.075631329 | 0.611117381 |
| pcaac365.pcaec364             | -0.015459583 | 0.03034493  | 0.611248202 |
| smc181.c5                     | -0.002827577 | 0.005552342 | 0.611390309 |
| lysopcac181.pcaec361          | 0.002504638  | 0.004919243 | 0.611465448 |



|                         |              |             |             |
|-------------------------|--------------|-------------|-------------|
| histidine.c3            | -0.033484849 | 0.065774237 | 0.611509779 |
| pcaec321.pcaec301       | -0.032026155 | 0.062914509 | 0.611541352 |
| pcaac404.c162           | 0.040719124  | 0.080004614 | 0.611599191 |
| pcaec382.c8             | 0.020435361  | 0.040168934 | 0.611755978 |
| pcaec445.pcaac321       | -0.012817248 | 0.025195085 | 0.611766653 |
| pcaac385.pcaac386       | -0.014481393 | 0.028473939 | 0.611861805 |
| c141oh.smc160           | -0.04688741  | 0.092193463 | 0.611867259 |
| pcaec363.pcaec420       | -0.014061008 | 0.027647941 | 0.611869259 |
| smohc161.lysopcac182    | -0.016764166 | 0.032964434 | 0.611883453 |
| c12.pcaec386            | 0.001358256  | 0.002671282 | 0.611944552 |
| lysopcac203.pcaec342    | 0.058469065  | 0.115004339 | 0.611985311 |
| smohc221.c181           | -0.007298376 | 0.014356785 | 0.612020424 |
| smohc141.ornithine      | 0.011630948  | 0.022889937 | 0.612182885 |
| lysopcac161.pcaac406    | -0.031328705 | 0.061658585 | 0.612200597 |
| smc202.pcaac361         | 0.025350062  | 0.049910826 | 0.612335283 |
| pcaec384.pcaec444       | 0.048485288  | 0.095467905 | 0.612361191 |
| lysopcac140.lysopcac181 | 0.021839537  | 0.043002975 | 0.612367461 |
| pcaac422.smohc221       | -0.054488071 | 0.107294826 | 0.612385677 |
| asparagine.pcaac424     | -0.008348094 | 0.016439057 | 0.612395684 |
| pcaec420.pcaec444       | -0.058939027 | 0.116068986 | 0.612415024 |
| pcaac404.taurine        | 0.011770759  | 0.023183038 | 0.61245811  |
| pcaac420.spermidine     | -0.035726763 | 0.070371652 | 0.612489327 |
| c162.pcaac281           | -0.000741056 | 0.001459803 | 0.612521498 |
| pcaec421.glycine        | 0.012651603  | 0.02492257  | 0.612524655 |
| lysopcac170.valine      | -0.039336404 | 0.07748967  | 0.612526192 |
| smc161.pcaec446         | -0.014774719 | 0.029114793 | 0.612644999 |
| pcaec424.c4             | -0.008271683 | 0.016302694 | 0.612703057 |
| pcaac384.pcaec364       | 0.012898511  | 0.025422908 | 0.612719523 |
| pcaac323.valine         | 0.025531033  | 0.050340218 | 0.612851156 |
| pcaec444.pcaac385       | -0.010064593 | 0.019848248 | 0.612915937 |
| smc180.pcaec423         | -0.010491505 | 0.020690171 | 0.612916206 |
| pcaec420.pcaec446       | 0.027414065  | 0.054067152 | 0.612943775 |
| lysopcac281.smc160      | 0.062115178  | 0.122509606 | 0.61295387  |
| smohc221.tyrosine       | -0.032337239 | 0.063779376 | 0.612957889 |
| putrescine.alanine      | -0.007090779 | 0.013985802 | 0.612971023 |
| pcaec445.pcaec342       | 0.045982986  | 0.090697257 | 0.612973942 |
| c101.serotonin          | -0.039978692 | 0.078859862 | 0.612998814 |
| pcaac422.pcaec444       | -0.065975246 | 0.130172179 | 0.613088447 |
| pcaac342.phenylalanine  | 0.018976659  | 0.037449916 | 0.613165166 |
| smohc222.pcaec423       | -0.009136372 | 0.018033639 | 0.613229286 |
| c5.glycine              | 0.029743239  | 0.058710761 | 0.613245469 |
| pcaec380.pcaec301       | -0.06668477  | 0.131642532 | 0.613278234 |
| c16.tyrosine            | 0.046700989  | 0.092194331 | 0.613285229 |

|                                 |              |             |             |
|---------------------------------|--------------|-------------|-------------|
| c141oh.transhydroxyproline      | 0.016294203  | 0.032170443 | 0.61332259  |
| pcaac240.pcaec363               | -0.017679077 | 0.0349113   | 0.613389956 |
| pcaec383.pcaac323               | -0.043413034 | 0.085728919 | 0.613390591 |
| pcaac425.lysopcac161            | 0.045451139  | 0.089763349 | 0.613429013 |
| alanine.valine                  | 0.0334562    | 0.066076471 | 0.613442036 |
| pcaac364.pcaec386               | 0.023244425  | 0.04591413  | 0.613488819 |
| c51dc.valine                    | -0.022171064 | 0.043808666 | 0.613607895 |
| lysopcac203.pcaec423            | 0.016053819  | 0.031729832 | 0.613702457 |
| pcaac341.smc181                 | -0.008491174 | 0.016787505 | 0.613807657 |
| pcaec365.c8                     | -0.026693403 | 0.052789495 | 0.613909726 |
| serotonin.lysopcac281           | -0.00991708  | 0.019614016 | 0.613941628 |
| smc160.leucine                  | -0.003443159 | 0.006810008 | 0.613948019 |
| creatinine.c8                   | -0.038051565 | 0.075272861 | 0.61400946  |
| pcaec300.acetylmethionine       | 0.006160782  | 0.012187808 | 0.614028924 |
| pcaac366.putrescine             | -0.035409662 | 0.070063593 | 0.614094826 |
| c2.pcaac363                     | 0.003917652  | 0.007752332 | 0.614124104 |
| pcaac364.smc241                 | 0.009820054  | 0.019439798 | 0.614263712 |
| pcaec382.pcaac360               | -0.043148777 | 0.085418578 | 0.61426858  |
| pcaec402.pcaec380               | 0.048656175  | 0.096325602 | 0.614284806 |
| lysopcac281.smohc161            | 0.007915352  | 0.015671841 | 0.614322276 |
| pcaec405.pcaec384               | -0.02164273  | 0.042856499 | 0.614366989 |
| pcaec386.pcaac404               | -0.008475519 | 0.016784763 | 0.614403033 |
| pcaec360.pcaac323               | 0.039422582  | 0.078073268 | 0.61440987  |
| c141.c16                        | 0.021454147  | 0.042495212 | 0.614468056 |
| pcaec424.lysopcac281            | 0.007044523  | 0.013956102 | 0.614536298 |
| asymmetricdimethylarginine.hist | -0.02366153  | 0.046879325 | 0.614557461 |
| c10.pcaac420                    | -0.053575889 | 0.106166979 | 0.614623857 |
| lysopcac180.c141                | 0.009990155  | 0.019797395 | 0.614636672 |
| smohc221.pcaac401               | -0.002960548 | 0.005866993 | 0.614642959 |
| isoleucine.pcaac426             | 0.030753058  | 0.060944684 | 0.614646196 |
| c102.pcaac323                   | 0.048279796  | 0.095682493 | 0.614662101 |
| pcaac300.lysopcac161            | 0.04327635   | 0.08576851  | 0.614670395 |
| pcaac366.pcaec420               | -0.020874721 | 0.04137214  | 0.614678593 |
| lysopcac280.methionine          | -0.01853161  | 0.036729379 | 0.614689275 |
| c101.pcaac365                   | 0.011545748  | 0.022885198 | 0.614715462 |
| pcaec401.pcaec321               | -0.007265822 | 0.014402005 | 0.614720043 |
| pcaac402.pcaec384               | -0.033381195 | 0.066168058 | 0.614726776 |
| glutamicacid.c141               | -0.026053014 | 0.051645591 | 0.614750191 |
| pcaac380.pcaac386               | 0.011234014  | 0.022273076 | 0.614807121 |
| c2.lysopcac161                  | -0.040327017 | 0.079959367 | 0.614829927 |
| pcaac426.c4                     | -0.008270891 | 0.016400459 | 0.614854704 |
| smohc241.pcaac240               | -0.006795378 | 0.013477308 | 0.614924567 |
| pcaac380.pcaac323               | 0.05375638   | 0.106637565 | 0.614998314 |

|                                |              |             |             |
|--------------------------------|--------------|-------------|-------------|
| pcaec443.c101                  | 0.017994572  | 0.035701537 | 0.615051334 |
| pcaec300.c102                  | 0.027583394  | 0.054747625 | 0.615191378 |
| c3.pcaec364                    | 0.009589547  | 0.019039146 | 0.615298539 |
| pcaec360.c3                    | 0.052550305  | 0.104340127 | 0.615320273 |
| c181.pcaac360                  | -0.01406866  | 0.027935111 | 0.615337793 |
| lysine.pcaec365                | -0.009979147 | 0.019821878 | 0.615462747 |
| pcaac425.pcaac421              | -0.014880347 | 0.029557292 | 0.615462893 |
| smc261.pcaec402                | -0.038051174 | 0.075599103 | 0.615541714 |
| pcaac403.smc241                | -0.020163895 | 0.040062436 | 0.615553373 |
| lysopcac182.leucine            | 0.004047448  | 0.008042019 | 0.615570342 |
| pcaac424.c4                    | -0.012287051 | 0.024419939 | 0.615662227 |
| pcaec384.taurine               | 0.025103308  | 0.049892492 | 0.615668192 |
| pcaec364.asymmetricdimethylar; | 0.015664557  | 0.031140384 | 0.615750704 |
| pcaac403.smc161                | 0.069727156  | 0.138702724 | 0.615975792 |
| pcaac404.pcaec384              | -0.020272758 | 0.040331669 | 0.616016633 |
| c5.pcaac406                    | 0.036727064  | 0.073086835 | 0.616113706 |
| c3.putrescine                  | 0.019999456  | 0.039817346 | 0.616276942 |
| pcaac420.lysine                | 0.059382783  | 0.118250909 | 0.616349811 |
| smohc241.asparagine            | -0.005131333 | 0.010218278 | 0.616352692 |
| pcaec300.c162                  | -0.042761311 | 0.085157325 | 0.616371761 |
| pcaec406.pcaec420              | -0.024527884 | 0.048846418 | 0.616373085 |
| pcaac421.smc181                | -0.006663723 | 0.013271701 | 0.616403089 |
| pcaec444.histidine             | -0.026222289 | 0.052226291 | 0.616410352 |
| pcaac384.c102                  | 0.014377156  | 0.028637368 | 0.61644404  |
| pcaec380.pcaec406              | -0.017233403 | 0.034336333 | 0.61654358  |
| lysopcac180.pcaec322           | -0.036603254 | 0.072933305 | 0.61656249  |
| asymmetricdimethylarginine.smc | -0.020405405 | 0.04065961  | 0.616572061 |
| pcaac386.pcaac421              | -0.010699596 | 0.02132017  | 0.616576344 |
| smc161.pcaac323                | -0.047806228 | 0.095272185 | 0.616623668 |
| c141.pcaac406                  | 0.057338538  | 0.114281753 | 0.616663089 |
| c18.pcaec342                   | 0.040303926  | 0.080341401 | 0.61671316  |
| smc260.pcaec386                | -0.005881329 | 0.011724264 | 0.616727805 |
| pcaac366.methioninesulfoxide   | 0.014316018  | 0.028541423 | 0.616762872 |
| lysopcac140.acetylmithoine     | 0.007116051  | 0.014187538 | 0.616774694 |
| pcaec300.pcaec361              | -0.007055011 | 0.014068507 | 0.616841419 |
| glycine.isoleucine             | 0.010865397  | 0.021667482 | 0.616851563 |
| lysopcac181.c14                | 0.031027177  | 0.061894872 | 0.616972754 |
| c10.pcaec343                   | -0.043431245 | 0.086641489 | 0.616981838 |
| pcaec301.smohc241              | -0.015518155 | 0.030958125 | 0.616990695 |
| asparticacid.pcaec342          | 0.048676904  | 0.097114213 | 0.617011179 |
| pcaec424.pcaec343              | 0.039753665  | 0.07934674  | 0.617166732 |
| c16.pcaac404                   | 0.003621613  | 0.007229716 | 0.617221218 |
| c102.c142                      | -0.027864231 | 0.055628354 | 0.617245463 |

|                                |              |             |             |
|--------------------------------|--------------|-------------|-------------|
| pcaac363.pcaec380              | 0.028593755  | 0.057096957 | 0.617320448 |
| pcaac405.pcaac343              | -0.013990079 | 0.027936173 | 0.617324486 |
| pcaac281.glutamicacid          | 0.020743157  | 0.04142651  | 0.617370398 |
| pcaac381.pcaec401              | 0.045888082  | 0.091647948 | 0.617386065 |
| c141.lysopcac161               | -0.053525015 | 0.106902573 | 0.617392967 |
| pcaac380.pcaec420              | -0.019403649 | 0.038759097 | 0.61744062  |
| pcaac383.pcaac361              | 0.038275963  | 0.076462051 | 0.617464552 |
| lysopcac161.pcaec363           | 0.013011536  | 0.025992698 | 0.617466952 |
| pcaac403.smc160                | -0.03569431  | 0.071328763 | 0.617582591 |
| pcaac364.c2                    | -0.035010902 | 0.069984761 | 0.617691384 |
| smc202.c51                     | -0.052337834 | 0.104649708 | 0.617790131 |
| glutamicacid.pcaac240          | 0.008550343  | 0.017096512 | 0.617791486 |
| pcaac322.pcaec446              | -0.046300839 | 0.092633243 | 0.617996895 |
| pcaac343.pcaec301              | -0.053786666 | 0.107623733 | 0.618041686 |
| pcaec343.asymmetricdimethylar; | -0.022283867 | 0.044592553 | 0.618072694 |
| pcaec424.asparagine            | 0.008198097  | 0.016406721 | 0.61810258  |
| lysopcac170.lysopcac161        | -0.041756315 | 0.083585229 | 0.618182258 |
| pcaac422.pcaec403              | 0.009089535  | 0.018196609 | 0.618215741 |
| pcaac402.serotonin             | -0.061127227 | 0.122373551 | 0.618219019 |
| pcaac321.smohc221              | -0.026578878 | 0.053210151 | 0.618223041 |
| pcaec403.histidine             | 0.035225187  | 0.070524216 | 0.618244947 |
| pcaec405.c141oh                | -0.046813461 | 0.093770726 | 0.618415843 |
| lysopcac161.pcaec362           | 0.013778527  | 0.027600938 | 0.618435633 |
| glutamicacid.pcaec341          | -0.025469705 | 0.051020767 | 0.618437272 |
| pcaec423.c182                  | -0.018646713 | 0.037359361 | 0.618497105 |
| pcaac321.acetylnithoine        | 0.004574054  | 0.009165652 | 0.618549492 |
| pcaac424.arginine              | -0.043883886 | 0.087936517 | 0.618551218 |
| c4.isoleucine                  | -0.007279736 | 0.014588244 | 0.618569946 |
| pcaac365.pcaac381              | 0.017148652  | 0.034367334 | 0.618592934 |
| pcaec444.pcaac321              | 0.015006057  | 0.030073472 | 0.618593838 |
| pcaac361.asparagine            | 0.009517011  | 0.019073589 | 0.618605839 |
| pcaec443.pcaec421              | -0.006022004 | 0.012070807 | 0.618657013 |
| pcaac402.c162                  | -0.049492255 | 0.099220382 | 0.618712238 |
| lysopcac203.methionine         | -0.022923252 | 0.045957071 | 0.618722295 |
| pcaec365.lysopcac203           | -0.008495479 | 0.017034245 | 0.618769808 |
| c51.pcaac281                   | 0.001244382  | 0.002495625 | 0.61884301  |
| lysopcac281.c8                 | -0.02909917  | 0.058359428 | 0.618846827 |
| pcaec361.pcaec322              | -0.040283063 | 0.080790045 | 0.618850809 |
| c10.pcaec446                   | -0.02512418  | 0.050408065 | 0.618990181 |
| lysopcac281.pcaac381           | 0.029741132  | 0.059681353 | 0.619049089 |
| histidine.h1                   | -0.001435451 | 0.002881013 | 0.619110119 |
| lysopcac280.pcaec444           | -0.061682719 | 0.123809901 | 0.619138364 |
| pcaec300.prolinr               | -0.018643183 | 0.037420739 | 0.619138718 |

|                              |              |             |             |
|------------------------------|--------------|-------------|-------------|
| h1.pcaec385                  | -0.038521803 | 0.077333125 | 0.619192464 |
| pcaec341.pcaec343            | 0.036879032  | 0.074038744 | 0.619209043 |
| pcaec421.c2                  | 0.061634227  | 0.123750898 | 0.61924684  |
| pcaec364.pcaac322            | -0.030024027 | 0.06028436  | 0.619254346 |
| c142.c10                     | -0.006533405 | 0.013121112 | 0.619331211 |
| acetylmethionine.h1          | 0.005835614  | 0.011724415 | 0.619471092 |
| pcaac402.methioninesulfoxide | 0.015929973  | 0.032012946 | 0.619556451 |
| pcaec445.c162                | 0.03490985   | 0.070156881 | 0.619565884 |
| c12.pcaac344                 | -0.027930344 | 0.056130678 | 0.61956727  |
| pcaac364.tyrosine            | -0.037235385 | 0.074850083 | 0.619657837 |
| serine.pcaec343              | -0.034613724 | 0.069588028 | 0.619697912 |
| pcaec384.smc202              | 0.03673428   | 0.073858441 | 0.619732059 |
| pcaac342.pcaac385            | -0.019530994 | 0.039270182 | 0.619740098 |
| c5.pcaac425                  | -0.066236257 | 0.133193776 | 0.619780012 |
| c51.pcaec385                 | 0.04260851   | 0.085685773 | 0.619799523 |
| pcaec360.pcaec383            | -0.069050386 | 0.138893264 | 0.619882212 |
| serine.pcaac385              | -0.009814935 | 0.019743717 | 0.619903484 |
| pcaec403.pcaac360            | -0.028846396 | 0.058038535 | 0.619970607 |
| c4.pcaac344                  | -0.019655955 | 0.039554233 | 0.620030111 |
| putrescine.pcaac360          | 0.027616428  | 0.055584183 | 0.620098441 |
| c4.pcaac343                  | -0.011551564 | 0.023251802 | 0.620124273 |
| pcaec401.pcaac422            | 0.059142836  | 0.119048937 | 0.620130351 |
| pcaac320.pcaac385            | -0.021170142 | 0.042623741 | 0.620214361 |
| pcaac366.lysopcac204         | -0.038103243 | 0.076728314 | 0.620267387 |
| pcaac425.pcaac426            | 0.058671617  | 0.118175167 | 0.620351404 |
| smc260.acetylmethionine      | 0.015266104  | 0.030754521 | 0.620417826 |
| alanine.pcaac344             | 0.030751483  | 0.061952308 | 0.620426403 |
| pcaac401.c3                  | -0.018626447 | 0.037530063 | 0.620472927 |
| pcaac381.spermidine          | 0.033995782  | 0.068509576 | 0.620534805 |
| pcaec405.threonine           | -0.016553298 | 0.033359663 | 0.62054355  |
| creatinine.smc261            | -0.012168062 | 0.024522523 | 0.620548855 |
| pcaec402.c51                 | 0.037948747  | 0.076490241 | 0.620600999 |
| c162.creatinine              | -0.005900586 | 0.011897439 | 0.620721391 |
| lysopcac182.c16              | 0.028679961  | 0.057831669 | 0.620744523 |
| citruiline.arginine          | -0.01698016  | 0.034241557 | 0.620764254 |
| pcaac322.acetylmethionine    | 0.00460472   | 0.009286341 | 0.620788115 |
| pcaac360.smc181              | -0.005090641 | 0.010268623 | 0.620867134 |
| smc202.pcaac386              | 0.004259049  | 0.008592526 | 0.620922082 |
| citruiline.acetylmethionine  | 0.021861372  | 0.044105125 | 0.620924883 |
| smohc161.pcaac365            | -0.033389911 | 0.067373013 | 0.620972316 |
| pcaec362.transhydroxyproline | 0.011710597  | 0.023632627 | 0.621022321 |
| c141.transhydroxyproline     | 0.012784768  | 0.025802843 | 0.621055849 |
| smohc222.pcaec384            | -0.017509782 | 0.035340165 | 0.621066372 |

|                               |              |             |             |
|-------------------------------|--------------|-------------|-------------|
| pcaac342.acetylornithoine     | 0.008944501  | 0.018063726 | 0.621277838 |
| pcaec381.smc202               | 0.043068298  | 0.086982029 | 0.621294373 |
| pcaec301.tryptophan           | -0.022690318 | 0.045830083 | 0.621325068 |
| histidine.methioninesulfoxide | -0.006760642 | 0.013662258 | 0.62150521  |
| lysopcac181.citruline         | 0.015897939  | 0.032127696 | 0.621508579 |
| c3.smc240                     | 0.021412615  | 0.043279272 | 0.621565926 |
| c102.c51                      | 0.009346476  | 0.018891394 | 0.621570624 |
| asparagine.pcaac385           | 0.009803967  | 0.019818124 | 0.621606413 |
| alanine.c51dc                 | -0.061069101 | 0.123463725 | 0.621652228 |
| pcaac343.pcaec446             | -0.023741548 | 0.048004708 | 0.621697897 |
| pcaac360.pcaac300             | -0.030955696 | 0.06262709  | 0.621895825 |
| c141oh.creatinine             | -0.011922632 | 0.024121301 | 0.621901391 |
| pcaec362.methioninesulfoxide  | 0.006805672  | 0.013771775 | 0.621973753 |
| pcaec424.c16                  | 0.014597089  | 0.029546519 | 0.622070857 |
| c8.threonine                  | 0.012904808  | 0.026122875 | 0.622094378 |
| glutamine.pcaac406            | -0.019376214 | 0.039223596 | 0.622101639 |
| smc180.spermidine             | 0.035136969  | 0.071135839 | 0.622138237 |
| pcaec383.smohc141             | -0.013055495 | 0.026431579 | 0.622142715 |
| pcaac402.transhydroxyproline  | 0.048528658  | 0.098251995 | 0.622153412 |
| pcaec403.pcaac300             | -0.034631372 | 0.070130291 | 0.622227783 |
| pcaec363.pcaec364             | -0.011123557 | 0.022530149 | 0.622295417 |
| pcaac425.pcaac406             | -0.035405478 | 0.071730348 | 0.622385181 |
| c162.smc161                   | -0.038692888 | 0.078391474 | 0.622389349 |
| pcaac383.pcaac405             | -0.034329196 | 0.069565785 | 0.622464915 |
| pcaac403.pcaac401             | -0.005116177 | 0.010367934 | 0.622476604 |
| pcaac322.pcaec385             | 0.025432956  | 0.051547709 | 0.622529342 |
| pcaac366.pcaec322             | -0.04724031  | 0.095753886 | 0.622554258 |
| c51.smohc161                  | 0.003950562  | 0.008008791 | 0.622605783 |
| citruline.lysopcac170         | 0.009227629  | 0.018709717 | 0.622661065 |
| pcaac422.pcaec384             | -0.036092067 | 0.07318642  | 0.622694379 |
| pcaac405.smc180               | 0.017984081  | 0.036470823 | 0.622725225 |
| pcaac322.pcaec361             | -0.007362443 | 0.014941391 | 0.62297465  |
| pcaac361.smc180               | -0.007344001 | 0.01490464  | 0.622990351 |
| pcaac384.pcaac386             | -0.009883994 | 0.020060675 | 0.623009806 |
| pcaac385.pcaec403             | -0.014248954 | 0.028920739 | 0.623020472 |
| c16.lysopcac203               | 0.010783033  | 0.021888611 | 0.62306112  |
| alphaaminoadipicacid.pcaac240 | -0.005161936 | 0.01047832  | 0.623062537 |
| lysopcac180.pcaec363          | -0.012063294 | 0.024491948 | 0.623125223 |
| smc160.asymmetricdimethylargi | -0.013410931 | 0.027230026 | 0.623150564 |
| lysopcac170.arginine          | -0.029689812 | 0.060291202 | 0.62319642  |
| pcaec404.smc241               | -0.017598994 | 0.035749056 | 0.623300516 |
| h1.smc261                     | 0.017469384  | 0.035487673 | 0.623319064 |
| pcaac320.c162                 | -0.042773235 | 0.086892948 | 0.623329046 |

|                                  |              |             |             |
|----------------------------------|--------------|-------------|-------------|
| pcaec380.pcaac323                | 0.024052102  | 0.048874034 | 0.623419115 |
| creatinine.pcaac403              | 0.004133951  | 0.008400493 | 0.623430508 |
| pcaac344.pcaac343                | -0.055042089 | 0.111853794 | 0.623443602 |
| smohc221.lysopcac161             | -0.050889546 | 0.103448046 | 0.623553761 |
| pcaec322.pcaac424                | 0.032619869  | 0.066314579 | 0.623580192 |
| pcaac341.pcaac281                | -0.002135087 | 0.004340778 | 0.623600347 |
| pcaec424.threonine               | -0.014379587 | 0.02923868  | 0.623647711 |
| smc202.pcaac380                  | 0.01681479   | 0.034190449 | 0.623649305 |
| pcaec360.methioninesulfoxide     | 0.007950052  | 0.016166392 | 0.623673088 |
| pcaac380.methionine              | -0.023641095 | 0.048081062 | 0.623723645 |
| pcaac300.pcaac361                | 0.005809906  | 0.011817964 | 0.623777214 |
| pcaac361.tyrosine                | 0.022200223  | 0.045165405 | 0.623837095 |
| pcaac426.lysopcac203             | -0.017674258 | 0.035961162 | 0.62387217  |
| pcaec380.pcaac322                | -0.048557215 | 0.098822363 | 0.623959119 |
| leucine.c3                       | 0.015000858  | 0.030533826 | 0.624009924 |
| pcaec405.kynurenine              | 0.005959008  | 0.012129524 | 0.624013668 |
| pcaec403.pcaac384                | -0.017599751 | 0.035831087 | 0.624080387 |
| pcaac425.pcaac383                | 0.053531983  | 0.109021139 | 0.624195197 |
| c4.pcaac420                      | 0.023871724  | 0.048627607 | 0.624276325 |
| prolinr.smohc221                 | -0.059508147 | 0.121229038 | 0.624301146 |
| c12.pcaec444                     | -0.067759636 | 0.138051452 | 0.624332785 |
| asparticacid.methioninesulfoxide | -0.017110715 | 0.03486172  | 0.624341356 |
| c2.valine                        | 0.037184174  | 0.075774512 | 0.624408599 |
| pcaac361.pcaac420                | -0.021179122 | 0.043160859 | 0.62442226  |
| pcaec403.pcaac402                | -0.026269418 | 0.053550512 | 0.624526708 |
| methionine.valine                | 0.027075233  | 0.055222614 | 0.624711244 |
| serotonin.lysopcac204            | 0.021715136  | 0.044290776 | 0.624715998 |
| c14.taurine                      | -0.017396944 | 0.035483929 | 0.624722371 |
| pcaec401.pcaac323                | 0.048669816  | 0.099270796 | 0.624724821 |
| citruline.c141oh                 | 0.060422985  | 0.123256421 | 0.624761128 |
| pcaec404.lysopcac170             | -0.009626274 | 0.019637295 | 0.624773909 |
| smc181.pcaac402                  | -0.029808646 | 0.06081561  | 0.624813255 |
| pcaac360.pcaac323                | 0.05566898   | 0.113599967 | 0.624886627 |
| pcaec404.c3                      | -0.018524415 | 0.037802577 | 0.624896153 |
| c3.citruline                     | 0.025050335  | 0.051132353 | 0.624980022 |
| pcaac320.pcaac281                | 0.001820625  | 0.003716255 | 0.624982165 |
| smc202.acetylnithoine            | -0.022934162 | 0.046818806 | 0.625023984 |
| c141.c141oh                      | 0.087819382  | 0.179279833 | 0.625026859 |
| pcaac426.pcaac322                | 0.039987836  | 0.081634898 | 0.625032344 |
| pcaec422.methioninesulfoxide     | 0.007748462  | 0.015820856 | 0.625085299 |
| kynurenine.pcaac384              | 0.021293477  | 0.043482864 | 0.625130737 |
| lysopcac180.glycine              | -0.009792461 | 0.019997244 | 0.62513611  |
| c141oh.lysopcac182               | -0.014186346 | 0.028975263 | 0.625198608 |

|                                |              |             |             |
|--------------------------------|--------------|-------------|-------------|
| pcaac320.c4                    | -0.008545215 | 0.017453495 | 0.625200657 |
| c5.pcaac364                    | -0.023273903 | 0.047540881 | 0.625231371 |
| c141.pcaec384                  | 0.023319526  | 0.047635548 | 0.625242069 |
| pcaec401.pcaac300              | -0.030279414 | 0.061882783 | 0.625409887 |
| pcaac386.lysopcac204           | -0.021581491 | 0.04410729  | 0.6254151   |
| lysopcac181.kynurenine         | -0.003453095 | 0.007057307 | 0.625416278 |
| smc160.pcaac320                | 0.051277063  | 0.104839707 | 0.62555327  |
| pcaac422.pcaec423              | 0.053522008  | 0.109437488 | 0.625577968 |
| pcaec404.transhydroxyproline   | 0.048426825  | 0.09903798  | 0.625643214 |
| pcaec402.histidine             | -0.041913384 | 0.085731736 | 0.625701348 |
| alphaaminoadipicacid.spermidin | 0.034484438  | 0.070540767 | 0.625723709 |
| c16.pcaac344                   | 0.006370676  | 0.013031755 | 0.625724005 |
| phenylalanine.pcaac364         | 0.039464515  | 0.080765437 | 0.625884056 |
| kynurenine.c141                | -0.016067702 | 0.032884424 | 0.625898109 |
| pcaac420.pcaec382              | -0.018581287 | 0.038033273 | 0.625938976 |
| pcaac403.pcaac404              | -0.010734366 | 0.021974693 | 0.625985468 |
| pcaec380.c0                    | 0.000711723  | 0.001457121 | 0.626015928 |
| lysopcac280.pcaec385           | -0.026785935 | 0.054839473 | 0.626017283 |
| c3.smohc241                    | 0.035744403  | 0.073189718 | 0.62606142  |
| pcaec360.smc260                | 0.01353937   | 0.027723133 | 0.626062872 |
| pcaac361.pcaec363              | -0.011517485 | 0.023583606 | 0.626069782 |
| c4.smc261                      | 0.016704797  | 0.034206025 | 0.62607681  |
| pcaec365.pcaec384              | 0.01695438   | 0.034723108 | 0.626136592 |
| pcaec384.pcaec422              | 0.028270097  | 0.057898067 | 0.626136667 |
| pcaec360.pcaec321              | 0.019910571  | 0.040783218 | 0.626185112 |
| c10.glycine                    | 0.018890607  | 0.03869507  | 0.626194609 |
| isoleucine.pcaec421            | 0.000597197  | 0.001223366 | 0.626217897 |
| asparticacid.pcaac383          | 0.005462418  | 0.011190825 | 0.626248126 |
| c4.smc181                      | 0.014743693  | 0.030207944 | 0.626278106 |
| c141oh.pcaec383                | 0.055713958  | 0.114171974 | 0.626342101 |
| pcaec364.c16                   | 0.018352412  | 0.037615124 | 0.626400723 |
| lysopcac280.c16                | -0.008811367 | 0.018068266 | 0.626562482 |
| pcaac365.pcaac321              | -0.022758934 | 0.046670623 | 0.626577165 |
| prolinr.pcaac406               | -0.016179361 | 0.033178589 | 0.626581024 |
| smc261.pcaac404                | -0.003033537 | 0.006221902 | 0.626642374 |
| lysopcac281.pcaec343           | -0.04365048  | 0.089530651 | 0.626649382 |
| pcaec360.c142                  | 0.026190621  | 0.053725356 | 0.626689679 |
| phenylalanine.c10              | 0.011920299  | 0.024452735 | 0.626695054 |
| pcaac363.pcaec383              | -0.030422204 | 0.062410024 | 0.626713596 |
| glutamine.h1                   | -0.000889702 | 0.001825202 | 0.626715809 |
| h1.c0                          | 0.000583152  | 0.001196648 | 0.626809663 |
| pcaac240.putrescine            | 0.017069896  | 0.035032503 | 0.626853677 |
| c141.pcaec365                  | -0.016179592 | 0.033211435 | 0.626916921 |



|                                |              |             |             |
|--------------------------------|--------------|-------------|-------------|
| pcaac344.pcaec445              | 0.035254439  | 0.072391332 | 0.627037965 |
| pcaec382.c5                    | 0.012996759  | 0.026687613 | 0.627039477 |
| pcaac343.pcaec421              | -0.003020573 | 0.006203237 | 0.627082497 |
| pcaac426.ornithine             | 0.012892011  | 0.026479084 | 0.627124777 |
| glutamine.smohc222             | -0.002645091 | 0.005433878 | 0.627193755 |
| pcaac406.tyrosine              | 0.025966364  | 0.053355358 | 0.627271034 |
| c162.smohc161                  | 0.002551175  | 0.005242396 | 0.62728898  |
| pcaac381.c51dc                 | 0.069274178  | 0.142371858 | 0.627339061 |
| c182.pcaac365                  | -0.016479235 | 0.033879688 | 0.627457526 |
| pcaac402.smc261                | -0.041740508 | 0.085816566 | 0.627466276 |
| c3.pcaac343                    | -0.008538155 | 0.017558095 | 0.627545421 |
| pcaec423.h1                    | 0.001675244  | 0.003445745 | 0.627618133 |
| lysopcac140.pcaac381           | 0.027559879  | 0.056692885 | 0.627654574 |
| pcaac366.serine                | 0.037253227  | 0.07664129  | 0.627692306 |
| pcaec383.smc260                | 0.019950782  | 0.041048913 | 0.627726197 |
| lysine.acetylmithoine          | 0.018178039  | 0.037402904 | 0.627739293 |
| pcaec361.isoleucine            | 0.010813523  | 0.022255545 | 0.627828515 |
| smc180.pcaec340                | -0.044654117 | 0.09191778  | 0.627881512 |
| pcaec424.pcaac425              | 0.049703296  | 0.102312418 | 0.627885578 |
| smohc221.pcaec342              | -0.075421175 | 0.155293216 | 0.627977359 |
| c141oh.pcaec364                | 0.008766119  | 0.018052353 | 0.628030567 |
| pcaec363.c4                    | -0.010240525 | 0.021088683 | 0.628031178 |
| c0.taurine                     | -0.024774052 | 0.051018493 | 0.628033829 |
| pcaec362.pcaac401              | -0.001967131 | 0.004051486 | 0.628073653 |
| lysopcac281.pcaac425           | 0.046613515  | 0.096050829 | 0.628238361 |
| pcaec424.phenylalanine         | 0.028994546  | 0.05975275  | 0.628279722 |
| c162.pcaac403                  | 0.004682899  | 0.009652005 | 0.628328044 |
| serotonin.pcaec445             | -0.026432481 | 0.054482031 | 0.628338023 |
| lysopcac182.pcaec340           | -0.025599205 | 0.052779653 | 0.628436567 |
| pcaac341.pcaec420              | -0.019319982 | 0.039833893 | 0.628441289 |
| pcaec382.spermidine            | 0.032622668  | 0.067272491 | 0.628498174 |
| pcaac384.pcaec341              | 0.031352136  | 0.0646703   | 0.628592741 |
| c14.pcaac424                   | 0.003646246  | 0.007521184 | 0.628594693 |
| smohc141.methioninesulfoxide   | 0.005991169  | 0.012359873 | 0.628643866 |
| pcaac383.pcaac385              | -0.009979119 | 0.020590023 | 0.628692959 |
| lysopcac181.c4                 | -0.01480643  | 0.030558426 | 0.628784551 |
| alphaaminoadipicacid.acetylnit | 0.038378125  | 0.079223468 | 0.62885519  |
| pcaec421.smc260                | 0.015373205  | 0.031736764 | 0.628877388 |
| pcaac342.lysopcac170           | -0.004598397 | 0.009493041 | 0.62887791  |
| c16.pcaac402                   | -0.016230509 | 0.033508442 | 0.628896231 |
| lysopcac280.smohc241           | 0.026292975  | 0.054288748 | 0.628934114 |
| pcaec386.pcaec401              | 0.025602499  | 0.052871601 | 0.628989378 |
| lysopcac204.pcaec385           | -0.018209777 | 0.037614707 | 0.629078498 |

|                               |              |             |             |
|-------------------------------|--------------|-------------|-------------|
| pcaec342.pcaac422             | -0.011074638 | 0.022876722 | 0.629087347 |
| pcaac320.pcaec420             | -0.01457137  | 0.030104027 | 0.629134634 |
| lysopcac203.isoleucine        | -0.019681477 | 0.040663259 | 0.629150653 |
| pcaec402.lysopcac281          | -0.013247962 | 0.027371785 | 0.62915819  |
| pcaec420.lysopcac181          | 0.029656124  | 0.061273128 | 0.629159457 |
| serine.pcaec362               | 0.009828808  | 0.020310448 | 0.629209129 |
| lysopcac280.c141              | 0.012956361  | 0.026774961 | 0.629230567 |
| alphaaminoadipicacid.pcaec385 | 0.026799854  | 0.055387015 | 0.629254008 |
| smc260.pcaac385               | -0.010273175 | 0.021231725 | 0.629257985 |
| c5.pcaec445                   | -0.053255582 | 0.110118059 | 0.629425822 |
| pcaac402.smc260               | 0.029733037  | 0.061480234 | 0.629428048 |
| pcaec445.pcaac360             | 0.024788288  | 0.051270292 | 0.629525032 |
| pcaec322.alphaaminoadipicacid | -0.015493859 | 0.032047268 | 0.629534619 |
| c14.pcaec384                  | 0.028158748  | 0.058253882 | 0.62959775  |
| glycine.alphaaminoadipicacid  | 0.01517308   | 0.031390425 | 0.62960715  |
| spermidine.h1                 | 0.005615885  | 0.01162012  | 0.629661495 |
| pcaac425.lysopcac160          | -0.011120927 | 0.023015415 | 0.629728796 |
| alanine.pcaac401              | 0.00133303   | 0.002758873 | 0.629739826 |
| pcaec405.lysopcac182          | 0.022010191  | 0.045553479 | 0.629744492 |
| lysopcac170.lysopcac160       | 0.007676219  | 0.015887565 | 0.629754115 |
| leucine.alanine               | 0.006838874  | 0.014155249 | 0.629772175 |
| pcaec404.isoleucine           | 0.006347567  | 0.013138439 | 0.629775003 |
| smohc222.c8                   | -0.019624256 | 0.040623562 | 0.629813078 |
| pcaec445.ornithine            | 0.013490243  | 0.027927539 | 0.629835205 |
| pcaac240.acetylornithoine     | 0.011439378  | 0.023683777 | 0.62986328  |
| phenylalanine.smohc161        | 0.006190948  | 0.012820202 | 0.629933535 |
| pcaec342.methioninesulfoxide  | 0.005153919  | 0.01067341  | 0.629955475 |
| pcaec383.lysopcac204          | -0.030150261 | 0.062460554 | 0.630072917 |
| pcaec340.smc261               | -0.037967902 | 0.078665284 | 0.630113658 |
| creatinine.pcaac383           | 0.002713419  | 0.005622124 | 0.630127122 |
| pcaac300.c4                   | -0.006504154 | 0.013478496 | 0.630179867 |
| pcaec384.pcaac343             | -0.015235702 | 0.031573108 | 0.630183211 |
| glycine.pcaec401              | 0.011607878  | 0.024060886 | 0.630265002 |
| pcaec361.smc260               | 0.016996699  | 0.035233036 | 0.630286012 |
| c10.pcaac426                  | -0.023480998 | 0.048688485 | 0.630383731 |
| spermidine.asparagine         | 0.022079864  | 0.045785852 | 0.630403564 |
| c10.pcaac421                  | 0.027398733  | 0.056823859 | 0.630454955 |
| pcaec340.pcaac343             | 0.026111584  | 0.054173655 | 0.630576613 |
| pcaec423.methioninesulfoxide  | 0.006466231  | 0.013415933 | 0.630588226 |
| pcaec403.pcaec301             | 0.034181126  | 0.070923502 | 0.630615055 |
| pcaac381.c181                 | 0.01766566   | 0.03665574  | 0.630621593 |
| pcaec301.pcaec445             | 0.020946814  | 0.043465012 | 0.630629227 |
| serine.c102                   | 0.01539825   | 0.031954558 | 0.630660376 |

|                                |              |             |             |
|--------------------------------|--------------|-------------|-------------|
| histidine.smc161               | -0.048321942 | 0.100301995 | 0.630741939 |
| pcaac343.smc241                | -0.012151974 | 0.025223945 | 0.630742696 |
| pcaac363.pcaac344              | 0.040362822  | 0.08379499  | 0.630798012 |
| smohc161.pcaac361              | 0.023855833  | 0.049526025 | 0.630799867 |
| pcaac402.isoleucine            | 0.008804283  | 0.018282812 | 0.630886415 |
| pcaec445.pcaec321              | 0.014365827  | 0.029838469 | 0.630962543 |
| pcaec322.pcaec445              | -0.040380813 | 0.083894941 | 0.631052742 |
| pcaec445.pcaac401              | -0.003125381 | 0.006493785 | 0.631079634 |
| c14.pcaec385                   | -0.025086639 | 0.052140429 | 0.631187379 |
| pcaac424.pcaec385              | 0.035362147  | 0.073498432 | 0.631193133 |
| lysopcac170.pcaac320           | 0.017527489  | 0.03644251  | 0.631310214 |
| ornithine.pcaec340             | -0.01948236  | 0.040507903 | 0.63131777  |
| pcaec343.ornithine             | -0.01685048  | 0.035041077 | 0.631370336 |
| pcaac321.c101                  | -0.002435741 | 0.005066226 | 0.631439639 |
| pcaac381.pcaac386              | 0.007934948  | 0.016505052 | 0.631454814 |
| smc161.lysopcac161             | -0.031441887 | 0.06542572  | 0.631585968 |
| alanine.pcaac365               | 0.035913768  | 0.074731833 | 0.631589692 |
| c142.smohc161                  | 0.002912814  | 0.006062125 | 0.631642588 |
| pcaac364.lysopcac161           | -0.042528771 | 0.088523945 | 0.631694234 |
| pcaac343.c141oh                | 0.036387938  | 0.075752072 | 0.631740627 |
| pcaac343.lysopcac182           | -0.008421518 | 0.01753391  | 0.63178086  |
| pcaac404.lysopcac181           | 0.02929326   | 0.060990322 | 0.631784664 |
| asparagine.alanine             | -0.027317682 | 0.056877467 | 0.631787158 |
| isoleucine.transhydroxyproline | -0.020022963 | 0.041696997 | 0.63184993  |
| c18.pcaec341                   | 0.024795959  | 0.051641473 | 0.631882296 |
| pcaec443.pcaac424              | -0.039304917 | 0.081872968 | 0.631941826 |
| lysopcac182.prolinr            | -0.016559504 | 0.034497983 | 0.631983155 |
| alanine.smc181                 | -0.006342234 | 0.013214574 | 0.632033732 |
| c10.threonine                  | 0.014895503  | 0.031040761 | 0.63208569  |
| c16.pcaec343                   | -0.029611942 | 0.061730029 | 0.632205114 |
| c162.pcaac404                  | 0.001004329  | 0.002093795 | 0.632227608 |
| pcaec403.pcaec343              | 0.035299436  | 0.073618641 | 0.632354297 |
| c10.putrescine                 | -0.018752394 | 0.03911027  | 0.632365314 |
| pcaac281.pcaec301              | -0.027991347 | 0.058380184 | 0.632371239 |
| pcaac383.acetylornithoine      | 0.006370577  | 0.01328798  | 0.632401436 |
| serine.isoleucine              | 0.01242527   | 0.025936011 | 0.632649742 |
| pcaac402.methionine            | -0.022315398 | 0.046585088 | 0.632684904 |
| c2.leucine                     | -0.003437142 | 0.007175444 | 0.632691947 |
| serine.pcaac420                | 0.02974737   | 0.062145584 | 0.632934827 |
| pcaec365.pcaac363              | -0.004624071 | 0.009660279 | 0.632937527 |
| c4.pcaec401                    | -0.026161707 | 0.05466324  | 0.632987697 |
| pcaec403.c2                    | 0.055716423  | 0.11643785  | 0.633051557 |
| lysopcac182.pcaec363           | 0.009406121  | 0.019666379 | 0.633210183 |

|                               |              |             |             |
|-------------------------------|--------------|-------------|-------------|
| pcaec402.c102                 | 0.017105804  | 0.035769771 | 0.63325617  |
| smc260.pcaec422               | -0.009987168 | 0.020889584 | 0.633345854 |
| glutamine.acetylmethionine    | 0.01352537   | 0.028290811 | 0.633352743 |
| pcaac365.lysopcac180          | 0.032008796  | 0.066961788 | 0.633400787 |
| pcaac424.asparticacid         | 0.032405979  | 0.067795901 | 0.63341687  |
| pcaec363.threonine            | -0.018251431 | 0.038186963 | 0.633448045 |
| pcaec401.isoleucine           | 0.01108055   | 0.023188726 | 0.633524129 |
| pcaac401.serine               | -0.055353667 | 0.115843336 | 0.633531223 |
| c102.pcaac343                 | -0.008466363 | 0.017721877 | 0.633600091 |
| c142.pcaac384                 | 0.028592653  | 0.05989901  | 0.633875209 |
| alanine.threonine             | 0.019738646  | 0.041351463 | 0.633881712 |
| c181.h1                       | 0.001844143  | 0.003863832 | 0.633920753 |
| lysopcac280.spermidine        | 0.033241803  | 0.069652826 | 0.63394466  |
| smc240.pcaac383               | 0.00166154   | 0.003481804 | 0.633975386 |
| pcaac405.c18                  | -0.024048915 | 0.050400584 | 0.634011702 |
| c182.pcaac424                 | 0.00290769   | 0.006094066 | 0.634026431 |
| ornithine.pcaec446            | 0.010617199  | 0.022253261 | 0.634045742 |
| lysopcac280.pcaec360          | 0.002945345  | 0.006173556 | 0.634057813 |
| kynurenine.pcaec446           | 0.041158859  | 0.086272164 | 0.634064202 |
| pcaec301.smc241               | -0.016689072 | 0.034982184 | 0.634069939 |
| pcaac380.smc181               | -0.012280159 | 0.025741619 | 0.634083313 |
| pcaac281.pcaec420             | -0.009292581 | 0.019480538 | 0.634108831 |
| c102.pcaac384                 | 0.02413639   | 0.050604042 | 0.634146523 |
| asparticacid.c5               | -0.004193261 | 0.008792299 | 0.634175901 |
| pcaac401.asparagine           | -0.008928326 | 0.018726608 | 0.634283955 |
| pcaac426.lysopcac161          | 0.051639437  | 0.108312354 | 0.634289723 |
| pcaec402.pcaac380             | 0.035765696  | 0.075023499 | 0.634316346 |
| kynurenine.pcaac404           | 0.003711121  | 0.007785794 | 0.634368678 |
| smc180.pcaec341               | 0.051865289  | 0.108826538 | 0.634415658 |
| smohc161.pcaec340             | -0.044051154 | 0.092445541 | 0.634470743 |
| smc260.smc240                 | 0.027401476  | 0.057508844 | 0.63449569  |
| pcaec405.c181                 | 0.011089089  | 0.023273577 | 0.63450083  |
| smohc141.threonine            | -0.022399991 | 0.047026573 | 0.634600746 |
| pcaec384.c18                  | 0.015955081  | 0.033496642 | 0.634606035 |
| isoleucine.pcaec422           | 0.019945873  | 0.041876675 | 0.634619178 |
| c18.transhydroxyproline       | 0.0190333    | 0.039977199 | 0.634758743 |
| pcaec385.pcaac401             | -0.000998843 | 0.002098185 | 0.634796284 |
| smohc161.lysopcac170          | -0.008325098 | 0.017492154 | 0.634879993 |
| pcaac342.pcaec360             | -0.002233026 | 0.004692847 | 0.634948967 |
| pcaac385.methioninesulfoxide  | 0.008906147  | 0.018719478 | 0.634996751 |
| isoleucine.pcaec343           | -0.042933955 | 0.090242941 | 0.635003327 |
| pcaac344.pcaac383             | -0.00424239  | 0.008917896 | 0.635034067 |
| alphaaminoadipicacid.pcaec443 | -0.037622762 | 0.079106507 | 0.635119462 |

|                         |              |             |             |
|-------------------------|--------------|-------------|-------------|
| pcaec386.c18            | -0.019679956 | 0.041382204 | 0.635141235 |
| c182.c51dc              | 0.05571126   | 0.117208039 | 0.635316253 |
| pcaac380.h1             | 0.001985425  | 0.004177406 | 0.635346334 |
| pcaac362.pcaac384       | 0.026786389  | 0.056373697 | 0.635431324 |
| c101.lysopcac170        | 0.012177412  | 0.025637955 | 0.63556044  |
| glutamine.histidine     | -0.020757658 | 0.043721357 | 0.635705745 |
| lysine.smc181           | -0.007080806 | 0.01491883  | 0.635812043 |
| pcaec404.pcaec386       | 0.003120153  | 0.006575098 | 0.635869798 |
| serotonin.h1            | -0.0025133   | 0.005297098 | 0.635922083 |
| lysopcac182.kynurenine  | 0.002621375  | 0.00552569  | 0.635971588 |
| pcaac300.pcaec422       | -0.012511688 | 0.026379026 | 0.63603796  |
| pcaec406.pcaac421       | -0.015407297 | 0.032484877 | 0.636047213 |
| pcaac426.pcaac343       | -0.019658205 | 0.041449924 | 0.636066726 |
| lysopcac204.pcaac281    | 0.001942312  | 0.004098397 | 0.636311463 |
| pcaec422.pcaac424       | -0.009524198 | 0.0201129   | 0.636583978 |
| pcaec384.lysopcac160    | -0.00726765  | 0.015349809 | 0.636632575 |
| pcaec423.smohc141       | -0.016536008 | 0.034952212 | 0.636892386 |
| pcaec443.isoleucine     | 0.008843576  | 0.018693199 | 0.636901446 |
| pcaec364.pcaac420       | 0.019752706  | 0.041757908 | 0.636945204 |
| histidine.pcaac385      | 0.005864681  | 0.0124      | 0.636995687 |
| c14.smc202              | -0.015907707 | 0.03363957  | 0.637046506 |
| pcaac323.smc161         | -0.032459217 | 0.068641549 | 0.637051295 |
| ornithine.pcaac402      | -0.015519748 | 0.032822536 | 0.637081079 |
| pcaac363.lysopcac160    | -0.016294889 | 0.034462785 | 0.637089982 |
| pcaac384.acetylmithoine | -0.023828131 | 0.050398957 | 0.63711525  |
| smc240.pcaac403         | -0.012709447 | 0.026882    | 0.63711785  |
| pcaec403.pcaac380       | 0.036546839  | 0.077306967 | 0.637144103 |
| lysopcac281.pcaac320    | 0.031249486  | 0.066105227 | 0.63716278  |
| lysopcac170.smc181      | -0.008396801 | 0.017764873 | 0.637205648 |
| smohc222.pcaac426       | -0.021262604 | 0.045007344 | 0.637374997 |
| c14.pcaec362            | 0.011805909  | 0.024990189 | 0.63737747  |
| serine.smohc161         | 0.007320791  | 0.015498568 | 0.637426613 |
| pcaec444.smc261         | 0.013264315  | 0.028088169 | 0.637507911 |
| phenylalanine.c181      | 0.018224488  | 0.03859328  | 0.637521654 |
| lysopcac182.c162        | 0.042095448  | 0.089167811 | 0.637611908 |
| pcaac406.methionine     | -0.017528922 | 0.037133409 | 0.637640269 |
| pcaac386.pcaac321       | -0.010511816 | 0.022272815 | 0.637708174 |
| pcaac386.pcaac384       | -0.022963548 | 0.048656165 | 0.637709344 |
| lysopcac140.creatinine  | -0.003358056 | 0.007115892 | 0.637742217 |
| pcaec406.c18            | -0.01706006  | 0.036157529 | 0.637801638 |
| pcaec444.pcaac320       | -0.013446983 | 0.028504207 | 0.637852633 |
| pcaec422.spermidine     | -0.032681283 | 0.069283234 | 0.637887393 |
| pcaac341.smc261         | 0.025665577  | 0.054412925 | 0.637904398 |

|                                 |              |             |             |
|---------------------------------|--------------|-------------|-------------|
| c2.pcaec364                     | 0.005102714  | 0.010818768 | 0.637924158 |
| alphaaminoadipicacid.isoleucine | -0.00693678  | 0.014712591 | 0.638043734 |
| smc241.pcaec342                 | 0.057489265  | 0.121933773 | 0.638048382 |
| pcaec383.pcaec384               | -0.016281221 | 0.034538768 | 0.638112239 |
| pcaac406.pcaac320               | 0.022507716  | 0.04775448  | 0.638160817 |
| c182.smc240                     | 0.019163786  | 0.040675106 | 0.638288084 |
| arginine.pcaac420               | 0.041151139  | 0.087352042 | 0.638321932 |
| c162.methionine                 | -0.012423165 | 0.026374791 | 0.638372608 |
| lysine.pcaec383                 | 0.034657767  | 0.073585061 | 0.638397557 |
| pcaec445.pcaac361               | 0.022939938  | 0.048716489 | 0.638470676 |
| pcaec405.pcaec424               | 0.019991872  | 0.042456181 | 0.638473544 |
| pcaec362.pcaac386               | 0.010063221  | 0.02137321  | 0.638508509 |
| pcaec322.pcaac420               | -0.046090852 | 0.097912591 | 0.638578838 |
| h1.pcaac320                     | -0.006681897 | 0.014194848 | 0.638584346 |
| pcaec384.pcaac401               | -0.000957212 | 0.002033844 | 0.638644938 |
| pcaac321.c51                    | 0.0663963    | 0.141079933 | 0.638654165 |
| pcaec384.pcaec386               | 0.004418595  | 0.009388725 | 0.638654994 |
| pcaec421.smohc222               | -0.008361677 | 0.017768517 | 0.638682297 |
| phenylalanine.lysopcac204       | -0.015125073 | 0.032145654 | 0.63873399  |
| lysopcac161.pcaec343            | 0.049244951  | 0.104668198 | 0.638755802 |
| pcaec385.methionine             | -0.011746538 | 0.024977502 | 0.638899393 |
| pcaec423.acetylnithoine         | -0.014913166 | 0.031711103 | 0.638901238 |
| c102.pcaec386                   | -0.00529656  | 0.011264271 | 0.63895348  |
| pcaec361.pcaec301               | -0.037032182 | 0.078766387 | 0.638993924 |
| c51dc.c0                        | 0.000678718  | 0.001443728 | 0.6390204   |
| kynurenine.pcaec402             | 0.025645103  | 0.054554443 | 0.639043339 |
| pcaac364.c142                   | 0.010392485  | 0.0221118   | 0.639104289 |
| pcaac342.pcaac425               | 0.054460949  | 0.115907569 | 0.639198279 |
| pcaac321.c141                   | -0.017578262 | 0.037435911 | 0.639418644 |
| pcaec381.pcaec301               | 0.046340832  | 0.098709866 | 0.639483585 |
| pcaac385.smc261                 | 0.033660665  | 0.071711174 | 0.639535517 |
| pcaac381.pcaec403               | 0.022228116  | 0.047356733 | 0.639547023 |
| pcaec380.transhydroxyproline    | 0.021110506  | 0.044979019 | 0.639571869 |
| glycine.c3                      | -0.021508745 | 0.045827865 | 0.639574359 |
| ornithine.smc260                | -0.012213513 | 0.026027315 | 0.639631543 |
| smc181.glutamine                | -0.011040567 | 0.02352923  | 0.639652763 |
| smc181.lysopcac281              | 0.008513789  | 0.018148075 | 0.639723108 |
| asymmetricdimethylarginine.c5   | -0.005179998 | 0.011042174 | 0.639736443 |
| methioninesulfoxide.pcaac320    | 0.067787891  | 0.144508197 | 0.639748276 |
| pcaac403.c4                     | -0.012620934 | 0.026907992 | 0.63978635  |
| pcaec405.pcaec361               | 0.009890156  | 0.021089823 | 0.63984794  |
| pcaec446.smohc241               | 0.04369358   | 0.093181439 | 0.639880261 |
| smohc161.pcaac426               | 0.023925461  | 0.051024633 | 0.639886258 |

|                                 |              |             |             |
|---------------------------------|--------------|-------------|-------------|
| phenylalanine.c0                | -0.000526568 | 0.001123065 | 0.63990984  |
| lysine.taurine                  | -0.018682576 | 0.039854406 | 0.639978645 |
| histidine.pcaac421              | 0.016614519  | 0.035443299 | 0.639983855 |
| pcaac366.c141                   | -0.033191937 | 0.070809671 | 0.639994337 |
| pcaac420.lysopcac281            | 0.005239767  | 0.011179939 | 0.640046281 |
| lysine.creatinine               | -0.007105748 | 0.01516177  | 0.640055991 |
| pcaac360.methionine             | -0.024594136 | 0.052488816 | 0.640129178 |
| pcaec321.pcaac344               | 0.02900587   | 0.061915052 | 0.640186989 |
| pcaec365.pcaec406               | 0.032362229  | 0.069080895 | 0.640194042 |
| c5.lysopcac281                  | -0.009597327 | 0.020487049 | 0.640201399 |
| pcaac300.pcaec384               | 0.028216357  | 0.060249641 | 0.640297111 |
| lysopcac160.spermidine          | 0.036155479  | 0.077211233 | 0.640337752 |
| pcaac321.threonine              | 0.012262835  | 0.026188337 | 0.640345944 |
| lysopcac203.c141oh              | -0.072366888 | 0.154545967 | 0.640346524 |
| pcaec444.lysopcac182            | 0.023495623  | 0.050179108 | 0.64036051  |
| serine.methioninesulfoxide      | 0.008014508  | 0.017118689 | 0.640404861 |
| methioninesulfoxide.pcaec363    | 0.019716978  | 0.04211506  | 0.640407506 |
| pcaec364.histidine              | -0.031303555 | 0.066870246 | 0.640439938 |
| pcaec364.pcaec382               | -0.017484733 | 0.037354828 | 0.640477201 |
| lysopcac140.pcaec420            | 0.017757324  | 0.037940055 | 0.640502347 |
| pcaac321.pcaec402               | 0.018634771  | 0.039815055 | 0.640504512 |
| pcaac401.lysopcac181            | -0.036275031 | 0.077513097 | 0.640538361 |
| methioninesulfoxide.asymmetric  | 0.013839733  | 0.029577063 | 0.640584501 |
| glycine.smohc241                | 0.040585718  | 0.086747695 | 0.640628604 |
| pcaec301.lysopcac160            | 0.008698363  | 0.018593113 | 0.640651552 |
| citruline.pcaec321              | -0.003923327 | 0.008388531 | 0.64074129  |
| pcaec382.pcaac404               | -0.008969215 | 0.019178657 | 0.640766184 |
| smc202.phenylalanine            | 0.023039294  | 0.049277975 | 0.640858304 |
| alanine.smc240                  | -0.022360666 | 0.047830934 | 0.640889364 |
| pcaac421.pcaac420               | -0.134312781 | 0.287341802 | 0.640933401 |
| pcaec380.pcaac322               | -0.039850941 | 0.085268663 | 0.640986697 |
| glycine.taurine                 | -0.016541355 | 0.035393424 | 0.640987174 |
| c142.c141                       | 0.027463855  | 0.05877019  | 0.641021032 |
| pcaec404.tyrosine               | -0.034330779 | 0.073474982 | 0.641067282 |
| pcaec425.lysopcac280            | -0.007292497 | 0.015608091 | 0.641080834 |
| pcaec343.pcaac364               | -0.024358311 | 0.052140197 | 0.641120759 |
| pcaec424.pcaec444               | -0.08541947  | 0.182858533 | 0.641145982 |
| alphaaminoadipicacid.methionine | 0.008058428  | 0.017262276 | 0.641368028 |
| pcaec322.pcaec383               | -0.03762148  | 0.080599665 | 0.641406109 |
| pcaec383.pcaac380               | 0.039816787  | 0.085318065 | 0.641465495 |
| pcaec383.lysopcac160            | 0.022397876  | 0.047996453 | 0.641486605 |
| c5.valine                       | 0.057287766  | 0.122763241 | 0.641489789 |
| glycine.c141                    | 0.021541915  | 0.046178547 | 0.641604426 |

|                                |              |             |             |
|--------------------------------|--------------|-------------|-------------|
| smc261.pcaec340                | -0.029534659 | 0.0633275   | 0.641684491 |
| pcaac362.asparagine            | -0.009519911 | 0.020413433 | 0.641701949 |
| lysopcac203.pcaac385           | 0.015894044  | 0.034089347 | 0.641779458 |
| glutamine.pcaec386             | 0.008630664  | 0.018518186 | 0.64190968  |
| pcaec362.pcaec401              | 0.018050404  | 0.038731193 | 0.64192479  |
| pcaac341.pcaec363              | -0.01518643  | 0.032586042 | 0.641926302 |
| pcaac300.c141                  | -0.018649379 | 0.040018093 | 0.641938633 |
| pcaec421.pcaec385              | 0.044990801  | 0.096554722 | 0.641982906 |
| pcaac365.pcaec363              | -0.015711676 | 0.033719993 | 0.64199452  |
| lysopcac181.smohc241           | -0.034341782 | 0.073728317 | 0.642106758 |
| pcaec361.leucine               | -0.033927053 | 0.072842442 | 0.642127326 |
| asymmetricdimethylarginine.smc | 0.01547609   | 0.033230787 | 0.642158737 |
| smohc221.smc202                | 0.037739979  | 0.081072699 | 0.642306957 |
| c12.lysopcac161                | 0.034041417  | 0.073128941 | 0.642313601 |
| c51dc.pcaec341                 | -0.047491751 | 0.102031114 | 0.642338704 |
| citruline.pcaac323             | 0.038967649  | 0.083720337 | 0.642348135 |
| c182.pcaec342                  | 0.031413843  | 0.067495756 | 0.642370043 |
| pcaac386.pcaec340              | -0.028382537 | 0.060992578 | 0.642423904 |
| pcaac424.pcaec420              | 0.041083357  | 0.088290427 | 0.642440679 |
| alanine.pcaec421               | 0.020802208  | 0.044713331 | 0.642501819 |
| smohc161.pcaec443              | -0.040084919 | 0.086165621 | 0.642521262 |
| c51dc.pcaec342                 | -0.044181923 | 0.09498462  | 0.642563845 |
| pcaec423.pcaec386              | 0.005574629  | 0.011987293 | 0.642637619 |
| pcaec386.lysopcac161           | 0.047385018  | 0.101896893 | 0.64264892  |
| pcaac401.c4                    | -0.008396969 | 0.018060192 | 0.642710038 |
| c101.pcaec384                  | 0.010006574  | 0.021523396 | 0.642729607 |
| lysopcac160.pcaec446           | -0.031002506 | 0.066704521 | 0.642831359 |
| pcaac404.pcaec383              | 0.032131467  | 0.069140498 | 0.642864598 |
| pcaec364.lysine                | 0.040683714  | 0.087550707 | 0.642892973 |
| smc160.methioninesulfoxide     | 0.005674353  | 0.012213392 | 0.642954786 |
| c5.pcaec342                    | -0.054793444 | 0.117948621 | 0.642988671 |
| pcaac380.pcaec384              | 0.021086466  | 0.045397357 | 0.643036431 |
| pcaac420.pcaec344              | 0.02062526   | 0.044406637 | 0.643053005 |
| pcaec300.smc260                | 0.013412422  | 0.028878787 | 0.643070814 |
| pcaac403.pcaec421              | -0.019087367 | 0.041100391 | 0.643092337 |
| alphaaminoadipicacid.smohc161  | -0.005949757 | 0.012812408 | 0.643116503 |
| c4.pcaac406                    | 0.026813633  | 0.057743962 | 0.643131299 |
| c141oh.pcaac300                | 0.022969865  | 0.049468501 | 0.643146105 |
| pcaec403.lysopcac170           | -0.009951433 | 0.021432331 | 0.643156409 |
| smohc222.pcaac421              | -0.008537567 | 0.018392841 | 0.643256414 |
| pcaac360.creatinine            | -0.00912552  | 0.019660825 | 0.643278844 |
| lysopcac203.glycine            | -0.038278847 | 0.082473693 | 0.643288396 |
| c162.pcaac363                  | 0.003879257  | 0.008358597 | 0.643309915 |



|                                |              |             |             |
|--------------------------------|--------------|-------------|-------------|
| c101.pcaec383                  | 0.024723545  | 0.053274852 | 0.643330332 |
| pcaec343.pcaec383              | -0.031710895 | 0.0683686   | 0.643511031 |
| pcaec381.h1                    | 0.001645851  | 0.003548621 | 0.643527005 |
| pcaac362.pcaac380              | 0.033574145  | 0.072393771 | 0.643547706 |
| lysopcac160.pcaec445           | 0.049325479  | 0.1063667   | 0.643576809 |
| smohc161.lysopcac204           | 0.013672507  | 0.029487445 | 0.643618483 |
| pcaec361.pcaec384              | -0.020996431 | 0.045308685 | 0.643806934 |
| pcaec446.pcaac385              | 0.024966882  | 0.0538814   | 0.643836364 |
| c141.pcaac421                  | 0.009648928  | 0.020823732 | 0.643840114 |
| pcaec402.c0                    | 0.000332746  | 0.000718427 | 0.643985085 |
| c181.pcaac383                  | 0.008787021  | 0.018971919 | 0.643985085 |
| pcaec322.pcaec321              | 0.044717641  | 0.096582951 | 0.64410095  |
| c102.histidine                 | -0.031667647 | 0.068397532 | 0.644103284 |
| pcaec423.tryptophan            | -0.00873747  | 0.018872069 | 0.644110277 |
| c4.lysopcac180                 | 0.031676393  | 0.068418065 | 0.644111222 |
| c101.pcaac404                  | 0.001639528  | 0.003541483 | 0.644135072 |
| asparagine.pcaac421            | 0.020784444  | 0.044897624 | 0.644149248 |
| ornithine.methioninesulfoxide  | -0.010819066 | 0.023373266 | 0.644183306 |
| alanine.lysine                 | -0.03072148  | 0.066370112 | 0.644183902 |
| pcaac425.serine                | -0.032247972 | 0.06967297  | 0.644207906 |
| putrescine.pcaec363            | 0.014405861  | 0.031131536 | 0.644283657 |
| pcaac343.pcaac386              | -0.012800711 | 0.027663636 | 0.644294193 |
| pcaec403.methioninesulfoxide   | 0.011143209  | 0.024081609 | 0.644294244 |
| methioninesulfoxide.pcaac424   | -0.011120583 | 0.024034674 | 0.644321263 |
| serine.pcaec405                | 0.026012047  | 0.056221738 | 0.644335774 |
| pcaac365.methioninesulfoxide   | 0.011134465  | 0.02406826  | 0.644370518 |
| pcaac320.pcaec422              | -0.012252982 | 0.02648957  | 0.644414504 |
| pcaec402.lysopcac204           | 0.027020109  | 0.058423742 | 0.644467195 |
| c51dc.pcaec364                 | 0.008040716  | 0.017385997 | 0.644469178 |
| c181.smohc221                  | 0.014207525  | 0.030721038 | 0.644478756 |
| c5.prolinr                     | 0.017493118  | 0.037831018 | 0.644526998 |
| pcaec401.pcaac386              | 0.019616594  | 0.042428173 | 0.644565009 |
| smohc241.pcaec444              | -0.050499083 | 0.109238186 | 0.644610886 |
| methionine.pcaec446            | -0.048517136 | 0.104961584 | 0.644644559 |
| pcaec381.pcaec384              | -0.022814661 | 0.049365256 | 0.644699482 |
| pcaec342.smc260                | 0.020791836  | 0.045010334 | 0.644860828 |
| lysopcac203.pcaac386           | -0.009998532 | 0.021646271 | 0.644881729 |
| asymmetricdimethylarginine.c10 | -0.011192109 | 0.024234769 | 0.644942679 |
| pcaec322.smc160                | 0.055937781  | 0.121131079 | 0.644960462 |
| pcaac342.pcaac384              | 0.041026488  | 0.088843982 | 0.644970595 |
| lysopcac161.serine             | 0.024538761  | 0.053140813 | 0.644979632 |
| alanine.lysopcac180            | 0.023110318  | 0.050050522 | 0.645000275 |
| smohc222.pcaac363              | -0.002915252 | 0.006314618 | 0.645052277 |

|                               |              |             |             |
|-------------------------------|--------------|-------------|-------------|
| c51dc.c101                    | -0.016561166 | 0.035873315 | 0.645059521 |
| phenylalanine.methionine      | -0.018304868 | 0.039654521 | 0.645094129 |
| c51dc.pcaec322                | 0.045749154  | 0.099117505 | 0.645125455 |
| pcaac403.lysopcac170          | -0.038878198 | 0.084233568 | 0.645134405 |
| pcaec385.c101                 | -0.005452063 | 0.011817909 | 0.645286957 |
| pcaac385.c5                   | 0.004027485  | 0.008730285 | 0.645298183 |
| pcaac422.pcaec360             | -0.002095553 | 0.00454314  | 0.645346133 |
| pcaec342.c3                   | -0.015008027 | 0.032537532 | 0.645348731 |
| pcaec422.tyrosine             | -0.027884712 | 0.060459267 | 0.64537587  |
| pcaac366.c102                 | 0.020570196  | 0.044602053 | 0.645390843 |
| pcaac365.pcaec361             | -0.010080325 | 0.021863709 | 0.645491799 |
| pcaec361.pcaac386             | 0.015975316  | 0.034651076 | 0.645505459 |
| c162.pcaac402                 | 0.013489689  | 0.029272029 | 0.645644918 |
| pcaec383.spermidine           | 0.031126936  | 0.067552961 | 0.645688314 |
| putrescine.lysopcac140        | 0.000784932  | 0.001703513 | 0.645692267 |
| pcaec401.kynurenine           | -0.006819479 | 0.014800603 | 0.645703632 |
| pcaac385.c14                  | -0.015075955 | 0.032726069 | 0.64576498  |
| pcaac365.smc260               | -0.016344146 | 0.035485967 | 0.645829831 |
| alanine.smohc241              | 0.016099897  | 0.034956162 | 0.645834571 |
| lysopcac280.pcaac343          | 0.010512208  | 0.022824916 | 0.645845625 |
| c0.c142                       | -0.024295812 | 0.052753172 | 0.645847103 |
| c10.pcaec401                  | -0.006898082 | 0.014979774 | 0.645892426 |
| asparagine.pcaac386           | 0.012407117  | 0.026944557 | 0.645910087 |
| alphaaminoadipicacid.pcaec322 | -0.028805841 | 0.062578278 | 0.646018531 |
| pcaac402.phenylalanine        | 0.044408036  | 0.096475138 | 0.646026716 |
| smc181.pcaec445               | -0.020498318 | 0.044540635 | 0.646090696 |
| pcaec424.pcaac323             | -0.038255592 | 0.083133437 | 0.646123044 |
| lysopcac180.kynurenine        | -0.00404484  | 0.008790169 | 0.646134465 |
| pcaac320.c3                   | 0.020620101  | 0.044812441 | 0.646143523 |
| smohc221.lysopcac182          | 0.011861442  | 0.025784477 | 0.646229247 |
| pcaec423.smc241               | -0.010019263 | 0.021782726 | 0.646271435 |
| pcaac380.spermidine           | -0.032322171 | 0.07029703  | 0.646392738 |
| lysopcac170.histidine         | -0.023002406 | 0.050028347 | 0.646397626 |
| pcaac426.smc160               | -0.043080244 | 0.093716418 | 0.646469358 |
| pcaec340.smc241               | -0.062649116 | 0.136289044 | 0.646475777 |
| c51.pcaec384                  | 0.015925462  | 0.034645852 | 0.646485786 |
| alanine.histidine             | -0.028297922 | 0.061572743 | 0.64654244  |
| pcaec382.pcaac402             | -0.034878716 | 0.075897597 | 0.646567889 |
| pcaac401.pcaac300             | -0.029307115 | 0.063774903 | 0.646574859 |
| pcaec385.smc261               | -0.016438037 | 0.035770701 | 0.646575424 |
| lysopcac280.smc241            | -0.025966721 | 0.056513482 | 0.646618964 |
| pcaec361.pcaec363             | 0.022598379  | 0.049199948 | 0.646734428 |
| pcaac403.pcaec446             | 0.03111367   | 0.067743901 | 0.646758359 |

|                               |              |             |             |
|-------------------------------|--------------|-------------|-------------|
| pcaac405.c14                  | 0.012207325  | 0.026582034 | 0.64679528  |
| phenylalanine.pcaec342        | 0.043938561  | 0.09569001  | 0.64683547  |
| pcaec340.glycine              | 0.026894289  | 0.058575161 | 0.646860199 |
| lysopcac204.pcaac406          | -0.018099012 | 0.039421365 | 0.646877884 |
| pcaec364.lysopcac170          | -0.004513542 | 0.009831054 | 0.646882279 |
| c8.histidine                  | -0.03051702  | 0.066499796 | 0.64703037  |
| c5.smc181                     | 0.020430651  | 0.044523356 | 0.647051181 |
| smohc241.pcaac421             | -0.008568498 | 0.018673344 | 0.647060031 |
| pcaac360.prolinr              | -0.02364134  | 0.051523724 | 0.647073476 |
| pcaac281.lysopcac180          | -0.027920326 | 0.060859467 | 0.647128351 |
| smc160.pcaec404               | -0.007424106 | 0.016183011 | 0.647134043 |
| pcaac360.pcaac384             | 0.024432888  | 0.05326308  | 0.647161508 |
| pcaec382.histidine            | 0.042195405  | 0.091987093 | 0.647169267 |
| acetylmithoine.pcaec343       | -0.013577628 | 0.029602365 | 0.647200118 |
| alphaaminoadipicacid.smohc222 | -0.002906455 | 0.006337686 | 0.647249065 |
| pcaec404.pcaac401             | -0.001440595 | 0.003141352 | 0.647254777 |
| c102.pcaac404                 | 0.002622975  | 0.005720611 | 0.647310433 |
| pcaec401.lysopcac280          | 0.005847451  | 0.012756439 | 0.647397107 |
| pcaac385.pcaac426             | -0.030633401 | 0.06685255  | 0.647517971 |
| phenylalanine.pcaec445        | 0.036676196  | 0.080055541 | 0.647581744 |
| ornithine.isoleucine          | -0.012347975 | 0.026958583 | 0.647652946 |
| histidine.pcaec446            | 0.053003846  | 0.11573138  | 0.64768502  |
| prolinr.pcaac402              | -0.014505628 | 0.031672491 | 0.647686471 |
| pcaec385.smc202               | 0.037181784  | 0.081198027 | 0.647739055 |
| smc161.histidine              | -0.029384243 | 0.064174965 | 0.647766166 |
| smc241.pcaac401               | -0.002333462 | 0.005096803 | 0.647800826 |
| h1.smc161                     | 0.045227305  | 0.098786583 | 0.64780101  |
| pcaac240.pcaec322             | -0.030227889 | 0.066025686 | 0.647806941 |
| lysopcac280.smc260            | 0.013008323  | 0.028415076 | 0.647823867 |
| pcaec401.lysopcac281          | 0.01155556   | 0.025243536 | 0.647847814 |
| pcaec382.pcaac401             | -0.002184387 | 0.004772781 | 0.647910288 |
| kynurenine.pcaac422           | -0.021992209 | 0.04806099  | 0.64797218  |
| pcaec385.alanine              | -0.008734385 | 0.019088044 | 0.64797612  |
| pcaac366.pcaec385             | 0.024894728  | 0.05441493  | 0.648037754 |
| pcaac362.pcaec420             | -0.010473811 | 0.022894896 | 0.648055314 |
| pcaec362.c8                   | -0.024356598 | 0.053244782 | 0.648075313 |
| lysopcac180.pcaac401          | -0.001517903 | 0.003318348 | 0.64808848  |
| pcaac320.methioninesulfoxide  | 0.008516196  | 0.018619544 | 0.648122864 |
| c182.spermidine               | -0.034550598 | 0.075541455 | 0.648127671 |
| c51dc.lysopcac280             | -0.004833633 | 0.010568764 | 0.648143308 |
| pcaac385.c4                   | -0.010892746 | 0.02383551  | 0.648397321 |
| methionine.pcaec301           | 0.03386978   | 0.074118755 | 0.648418951 |
| pcaac385.tyrosine             | -0.031029203 | 0.067904471 | 0.648428011 |

|                              |              |             |             |
|------------------------------|--------------|-------------|-------------|
| pcaac424.pcaec321            | 0.015801334  | 0.034584296 | 0.648471329 |
| smc160.pcaac300              | -0.031755629 | 0.069508658 | 0.648496222 |
| pcaac281.threonine           | -0.022049914 | 0.048277387 | 0.648585728 |
| asparagine.pcaec386          | 0.003251436  | 0.007119084 | 0.648594796 |
| c182.pcaac425                | 0.027505137  | 0.060230898 | 0.648637509 |
| c8.pcaac300                  | 0.025618775  | 0.056104179 | 0.648661134 |
| pcaec443.methioninesulfoxide | 0.009365295  | 0.020512124 | 0.648700586 |
| pcaac366.acetylorlithoine    | -0.022155204 | 0.048528456 | 0.648724351 |
| pcaec404.pcaec385            | 0.040142288  | 0.08793464  | 0.648752353 |
| pcaac426.c102                | 0.019017731  | 0.041672086 | 0.648849339 |
| smc241.pcaec341              | 0.049963832  | 0.109488392 | 0.648868779 |
| smc181.c141                  | -0.015126038 | 0.033154227 | 0.648945163 |
| isoleucine.glycine           | 0.020697507  | 0.045366181 | 0.648945517 |
| c14.pcaac421                 | 0.009548272  | 0.020937352 | 0.649083222 |
| pcaec422.smc241              | -0.012019163 | 0.026359606 | 0.649134213 |
| pcaec401.transhydroxyproline | 0.013147712  | 0.028834821 | 0.649136023 |
| alphaaminoadipicacid.alanine | 0.005912095  | 0.012968733 | 0.649203099 |
| serotonin.smc161             | 0.032185299  | 0.070605493 | 0.649221766 |
| pcaec322.smc180              | -0.013218625 | 0.029009568 | 0.649352778 |
| smc180.c8                    | -0.021152879 | 0.046422585 | 0.649356438 |
| pcaac405.pcaec422            | -0.006901402 | 0.015154061 | 0.649530922 |
| pcaec422.c2                  | -0.032206475 | 0.070728389 | 0.649575222 |
| serine.phenylalanine         | 0.018830539  | 0.041355212 | 0.649587963 |
| pcaec381.serotonin           | -0.053454683 | 0.117406073 | 0.649616021 |
| phenylalanine.leucine        | -0.010605626 | 0.023298855 | 0.649686305 |
| lysopcac170.lysopcac281      | -0.009845777 | 0.021632183 | 0.6497255   |
| methioninesulfoxide.pcaac425 | 0.061637616  | 0.135433604 | 0.649748238 |
| methionine.pcaec401          | 0.013656837  | 0.030008092 | 0.649753997 |
| pcaec384.methionine          | -0.009775423 | 0.021479763 | 0.649758271 |
| c8.pcaac321                  | 0.010598754  | 0.023293773 | 0.649826777 |
| alphaaminoadipicacid.smc241  | 0.010725794  | 0.023573466 | 0.649833497 |
| smohc241.pcaec365            | 0.0155777    | 0.034243348 | 0.649892814 |
| c141oh.valine                | 0.030597454  | 0.067290757 | 0.650041046 |
| pcaec404.pcaac364            | -0.020509532 | 0.04510893  | 0.650068591 |
| pcaec385.pcaec342            | 0.058255374  | 0.12814986  | 0.650125215 |
| methionine.lysopcac281       | -0.006513652 | 0.014333177 | 0.650227233 |
| pcaac424.pcaec383            | -0.094813059 | 0.208635995 | 0.650229588 |
| pcaec364.pcaec301            | 0.039302622  | 0.08650606  | 0.650307645 |
| smc160.pcaac401              | -0.001101482 | 0.00242468  | 0.65034666  |
| lysopcac170.c10              | -0.003893931 | 0.008574353 | 0.650448852 |
| pcaec404.pcaac380            | 0.042553055  | 0.093702925 | 0.650455859 |
| pcaac362.pcaac424            | 0.008018128  | 0.017656662 | 0.6504658   |
| pcaec322.smc261              | 0.022999803  | 0.050667023 | 0.650590108 |

|                               |              |             |             |
|-------------------------------|--------------|-------------|-------------|
| smc161.c0                     | 0.000595014  | 0.001311122 | 0.650676195 |
| lysopcac203.tyrosine          | 0.030652331  | 0.067544197 | 0.650682601 |
| smc260.methioninesulfoxide    | 0.00475767   | 0.010488612 | 0.650832003 |
| pcaec381.lysopcac180          | -0.041459351 | 0.091414318 | 0.650883017 |
| leucine.isoleucine            | 0.02710557   | 0.059766458 | 0.650888458 |
| pcaac323.pcaac360             | 0.021356967  | 0.047093859 | 0.650907747 |
| pcaac381.smc160               | -0.026300042 | 0.057994548 | 0.650912273 |
| pcaac381.pcaac300             | -0.030813493 | 0.06794814  | 0.650916702 |
| c162.pcaac365                 | 0.021284427  | 0.046939396 | 0.650945874 |
| c51dc.c142                    | 0.023442655  | 0.051701408 | 0.650960897 |
| pcaac344.pcaec385             | 0.021201881  | 0.046759875 | 0.650963419 |
| pcaec384.pcaac360             | 0.020253435  | 0.044672912 | 0.65099838  |
| pcaec405.serine               | -0.038773924 | 0.085527229 | 0.651012682 |
| pcaac362.pcaec386             | 0.004796604  | 0.010581162 | 0.651038782 |
| methioninesulfoxide.pcaac401  | -0.00782003  | 0.01725119  | 0.651047162 |
| pcaec446.pcaac320             | -0.018394374 | 0.040593235 | 0.651165599 |
| pcaac405.methionine           | -0.018105518 | 0.039962328 | 0.651218923 |
| pcaec420.pcaec401             | 0.030537347  | 0.067407071 | 0.651244643 |
| pcaac383.pcaac406             | -0.028495334 | 0.062906004 | 0.651277752 |
| lysopcac170.smohc161          | -0.007616826 | 0.016819153 | 0.651361458 |
| phenylalanine.asparticacid    | 0.023758296  | 0.052463641 | 0.651371233 |
| smc202.lysine                 | 0.031644959  | 0.069879987 | 0.651375089 |
| pcaec445.pcaec363             | 0.036588618  | 0.080800923 | 0.651391598 |
| pcaec404.valine               | -0.015790675 | 0.034872614 | 0.651401691 |
| pcaec342.c4                   | -0.007268364 | 0.016051903 | 0.651406227 |
| smohc141.pcaec404             | -0.007400903 | 0.016344893 | 0.651411184 |
| smc180.smc160                 | -0.057287893 | 0.126526542 | 0.651427898 |
| pcaac420.taurine              | -0.025530337 | 0.056398833 | 0.651498876 |
| pcaec341.pcaac384             | 0.022380777  | 0.049444753 | 0.651522448 |
| methionine.smohc222           | 0.00279567   | 0.006176686 | 0.651540814 |
| pcaec380.acetylorlornithoine  | -0.017270083 | 0.038181262 | 0.651755088 |
| pcaec300.h1                   | 0.001090767  | 0.002411827 | 0.651798784 |
| alphaaminoadipicacid.pcaec365 | -0.01456421  | 0.032211894 | 0.651884892 |
| smc240.smc160                 | 0.040731492  | 0.090104828 | 0.651951023 |
| pcaec360.pcaec422             | -0.011232512 | 0.024849894 | 0.651973387 |
| pcaac320.phenylalanine        | 0.024780379  | 0.054826402 | 0.651998935 |
| lysopcac182.pcaac386          | -0.01929715  | 0.042697972 | 0.652023061 |
| pcaec362.lysopcac280          | 0.004629666  | 0.010244725 | 0.652050398 |
| pcaac320.pcaec360             | -0.003340405 | 0.00739203  | 0.652060824 |
| c16.c5                        | -0.008467647 | 0.018738316 | 0.652063274 |
| smohc141.pcaec384             | -0.045855575 | 0.10150854  | 0.652169893 |
| c51.glycine                   | -0.013330109 | 0.029516652 | 0.652261813 |
| pcaec380.pcaec363             | 0.014426998  | 0.031955366 | 0.652362266 |

|                              |              |             |             |
|------------------------------|--------------|-------------|-------------|
| lysopcac170.pcaec405         | -0.018573119 | 0.041145555 | 0.652414768 |
| pcaac360.smohc141            | -0.017285603 | 0.038304034 | 0.652505817 |
| pcaec341.taurine             | 0.011844934  | 0.026247959 | 0.652507987 |
| pcaec380.pcaec445            | -0.030367756 | 0.067296002 | 0.652518203 |
| pcaec446.h1                  | 0.003652194  | 0.008093734 | 0.652532072 |
| smc260.threonine             | -0.020301696 | 0.044991588 | 0.652534961 |
| pcaec383.pcaec445            | -0.025381096 | 0.056260382 | 0.652604642 |
| pcaac384.pcaec385            | -0.03031205  | 0.067200422 | 0.652652726 |
| pcaac402.pcaac381            | 0.029669616  | 0.065812341 | 0.652830933 |
| smc240.pcaac240              | -0.006214965 | 0.013787533 | 0.652870088 |
| smc161.pcaec402              | -0.017115266 | 0.03797794  | 0.652944605 |
| pcaec404.methioninesulfoxide | 0.008512145  | 0.018891317 | 0.653000923 |
| pcaec384.pcaec423            | 0.00831693   | 0.018459288 | 0.653022324 |
| smc181.lysopcac180           | -0.03054525  | 0.067796592 | 0.65303148  |
| pcaac403.pcaac386            | 0.007377662  | 0.016375826 | 0.653046607 |
| pcaac383.isoleucine          | 0.020008438  | 0.044438379 | 0.653240932 |
| pcaac384.pcaac401            | -0.001156176 | 0.002567883 | 0.653245593 |
| c162.smc240                  | 0.014847472  | 0.032979879 | 0.653279337 |
| pcaec403.c0                  | -0.000621319 | 0.001380451 | 0.653361353 |
| lysopcac140.pcaec446         | -0.057232336 | 0.127176171 | 0.653404375 |
| alanine.pcaec384             | 0.012896372  | 0.028663148 | 0.653472974 |
| pcaac362.pcaac402            | 0.039318325  | 0.08740063  | 0.653520087 |
| pcaac381.pcaec363            | -0.025423509 | 0.056532335 | 0.653625787 |
| pcaac426.pcaec340            | 0.034050793  | 0.075724073 | 0.653659531 |
| pcaac406.c51dc               | -0.058850465 | 0.130880926 | 0.653674226 |
| pcaec402.tyrosine            | -0.029975487 | 0.066672035 | 0.653712212 |
| smohc161.smc160              | 0.068275423  | 0.15188121  | 0.653758517 |
| c101.c14                     | 0.017812569  | 0.039625055 | 0.653761245 |
| pcaac424.pcaec421            | -0.0163384   | 0.036346621 | 0.653769599 |
| pcaec382.pcaec403            | -0.108984884 | 0.242488697 | 0.653822244 |
| pcaac366.c8                  | -0.019226807 | 0.04278182  | 0.653842235 |
| pcaac361.c0                  | 0.000553008  | 0.001230537 | 0.653850557 |
| prolinr.pcaac343             | -0.00991637  | 0.022066112 | 0.653857871 |
| c12.pcaec342                 | 0.031634776  | 0.070402052 | 0.653893212 |
| glycine.pcaac381             | -0.008875524 | 0.019752862 | 0.653904712 |
| pcaac362.pcaec384            | 0.023158684  | 0.051541428 | 0.653909595 |
| phenylalanine.c51            | 0.019648157  | 0.04372855  | 0.653910108 |
| pcaac405.lysopcac203         | 0.011387268  | 0.025344086 | 0.653920407 |
| c162.smc181                  | -0.012256963 | 0.027283613 | 0.653966496 |
| lysopcac281.valine           | -0.021984572 | 0.048942    | 0.653999746 |
| pcaac386.threonine           | 0.015232561  | 0.033911173 | 0.65400436  |
| pcaac385.pcaac320            | -0.044596982 | 0.099283211 | 0.654004698 |
| alanine.prolinr              | -0.02957228  | 0.065852998 | 0.654094286 |

|                                 |              |             |             |
|---------------------------------|--------------|-------------|-------------|
| smc241.h1                       | 0.001673725  | 0.003727486 | 0.654124875 |
| c3.pcaec386                     | 0.00694708   | 0.015472422 | 0.654142828 |
| pcaac322.pcaac384               | 0.034045196  | 0.075859482 | 0.65429014  |
| pcaac422.c0                     | 0.00038908   | 0.000867524 | 0.654504814 |
| smc180.leucine                  | -0.003655516 | 0.008150914 | 0.654515837 |
| pcaac360.c8                     | 0.027498918  | 0.061327859 | 0.65457871  |
| smc161.lysopcac281              | 0.00547936   | 0.012222362 | 0.654640456 |
| c102.smc160                     | -0.045957997 | 0.102522479 | 0.65466476  |
| c12.smc260                      | 0.019544172  | 0.043602223 | 0.654689539 |
| lysopcac204.pcaec384            | 0.022259146  | 0.049670386 | 0.654762104 |
| pcaac406.smohc221               | 0.014914776  | 0.033285812 | 0.65480176  |
| c162.tryptophan                 | 0.004821528  | 0.010762239 | 0.654857838 |
| pcaac341.pcaec321               | -0.009803841 | 0.02188591  | 0.654895292 |
| lysopcac281.pcaac300            | -0.027632367 | 0.061705672 | 0.65499822  |
| c12.smohc161                    | 0.004975018  | 0.011110208 | 0.655013489 |
| pcaac422.pcaec406               | 0.042559604  | 0.095059289 | 0.655065017 |
| smc261.spermidine               | -0.031234071 | 0.069771841 | 0.655105543 |
| lysopcac160.serine              | -0.020084541 | 0.044873771 | 0.655164225 |
| pcaec341.pcaec402               | -0.032604518 | 0.072877587 | 0.65530189  |
| smohc141.pcaac364               | -0.02734847  | 0.061151539 | 0.65541919  |
| c12.smc180                      | 0.005019713  | 0.01122442  | 0.655427076 |
| pcaec421.pcaac401               | -0.002333956 | 0.005220236 | 0.655510466 |
| pcaac323.asparticacid           | 0.019152256  | 0.042868418 | 0.655747714 |
| lysopcac180.pcaec420            | -0.020469904 | 0.045828475 | 0.655823356 |
| citruline.glutamicacid          | -0.019224327 | 0.04305162  | 0.655911321 |
| smc260.pcaac341                 | 0.024361198  | 0.054568219 | 0.655987445 |
| pcaec422.c16                    | 0.010820833  | 0.024238861 | 0.655995119 |
| smc261.isoleucine               | 0.012271634  | 0.027490212 | 0.656013032 |
| c162.smc261                     | -0.012346967 | 0.027661978 | 0.656048012 |
| pcaac421.pcaec402               | -0.041229641 | 0.09237717  | 0.656071828 |
| pcaec405.pcaac401               | -0.001296377 | 0.0029046   | 0.656071893 |
| c16.pcaec321                    | 0.016745853  | 0.037522714 | 0.656095424 |
| pcaec383.c0                     | -0.000541825 | 0.00121453  | 0.656215557 |
| smc160.c142                     | 0.039085587  | 0.087614732 | 0.656223879 |
| ornithine.pcaac323              | -0.032003197 | 0.071744292 | 0.656248668 |
| pcaac401.lysopcac170            | 0.015964735  | 0.035803934 | 0.656378184 |
| c102.pcaec343                   | 0.030963612  | 0.069443077 | 0.656384333 |
| pcaac281.kynurenine             | -0.00279763  | 0.006275267 | 0.656432145 |
| asymmetricdimethylarginine.isol | 0.012290614  | 0.027576384 | 0.65652222  |
| prolinr.lysopcac204             | -0.007615764 | 0.017088553 | 0.656542983 |
| c141oh.smohc221                 | -0.030017105 | 0.067357987 | 0.656564047 |
| smohc161.pcaec423               | -0.007353211 | 0.016501409 | 0.65658159  |
| pcaac403.pcaec382               | 0.015629593  | 0.035080579 | 0.65663709  |

|                              |              |             |             |
|------------------------------|--------------|-------------|-------------|
| pcaac385.acetylornithoine    | -0.023246184 | 0.052190181 | 0.656724357 |
| pcaac385.lysopcac281         | 0.010156101  | 0.022802583 | 0.656739085 |
| putrescine.pcaac343          | -0.010161943 | 0.022816241 | 0.656746695 |
| pcaec322.threonine           | -0.024868481 | 0.055844514 | 0.656793923 |
| smc240.lysine                | 0.022892223  | 0.051411917 | 0.656826872 |
| lysopcac182.pcaac360         | 0.015154635  | 0.034044457 | 0.656919303 |
| c5.pcaec420                  | -0.014673632 | 0.032965513 | 0.656935041 |
| kynurenine.pcaac321          | -0.007813733 | 0.017555246 | 0.65695435  |
| pcaac240.pcaac421            | -0.01925837  | 0.043268681 | 0.65695861  |
| pcaac385.c51dc               | -0.056174583 | 0.126216701 | 0.656975487 |
| lysopcac160.pcaec403         | 0.040173806  | 0.09027045  | 0.656994443 |
| pcaac421.lysopcac281         | 0.00891581   | 0.02004136  | 0.657115401 |
| c2.pcaec380                  | -0.022715507 | 0.051071481 | 0.657181572 |
| pcaec403.methionine          | -0.015786149 | 0.035494142 | 0.657199651 |
| pcaec341.acetylornithoine    | 0.007318946  | 0.016456654 | 0.65720886  |
| pcaac384.pcaac365            | -0.020518063 | 0.046135662 | 0.657214354 |
| lysopcac180.pcaec382         | 0.002692206  | 0.006054186 | 0.657249047 |
| pcaec381.lysopcac181         | 0.035443074  | 0.079709768 | 0.657273234 |
| lysopcac182.lysopcac140      | -0.004958701 | 0.011155073 | 0.657364988 |
| lysopcac140.pcaac425         | 0.048574998  | 0.109275097 | 0.657367891 |
| pcaac366.pcaac364            | -0.028514632 | 0.064152421 | 0.657395104 |
| pcaec424.pcaac320            | -0.018043987 | 0.040603115 | 0.657455296 |
| smc160.smohc141              | -0.042822676 | 0.096430429 | 0.657686498 |
| pcaac422.c18                 | 0.019691459  | 0.044346146 | 0.657714286 |
| leucine.pcaac384             | 0.029290916  | 0.065970659 | 0.657743702 |
| c141oh.ornithine             | -0.009005463 | 0.020290319 | 0.657865326 |
| pcaec301.pcaac401            | 0.004981345  | 0.011223646 | 0.657868644 |
| smohc161.c5                  | -0.002013792 | 0.004538511 | 0.657950819 |
| pcaac383.methioninesulfoxide | 0.010219511  | 0.023033135 | 0.657968557 |
| c141oh.lysopcac181           | 0.025096327  | 0.056585029 | 0.658092683 |
| methionine.putrescine        | -0.017319561 | 0.039056236 | 0.658138441 |
| c101.c51dc                   | -0.065264131 | 0.147189357 | 0.658174052 |
| pcaec382.pcaec386            | 0.005679929  | 0.012810095 | 0.658179655 |
| pcaec402.h1                  | 0.001409542  | 0.003178982 | 0.658180012 |
| pcaac424.pcaec360            | -0.00192617  | 0.004345385 | 0.658271078 |
| pcaac343.pcaec405            | 0.030486743  | 0.068779111 | 0.658279856 |
| pcaec443.pcaac403            | 0.009467674  | 0.021361009 | 0.658304136 |
| c51dc.transhydroxyproline    | 0.009797112  | 0.022110497 | 0.65839389  |
| asparagine.lysopcac203       | -0.026968456 | 0.060865291 | 0.658403611 |
| c4.pcaac384                  | -0.021106979 | 0.047636737 | 0.658405315 |
| alanine.c102                 | 0.019678607  | 0.044414908 | 0.65841892  |
| pcaac421.pcaec401            | 0.01487488   | 0.033579583 | 0.658483254 |
| pcaec385.c16                 | 0.018110592  | 0.040885463 | 0.658493892 |



|                                |              |             |             |
|--------------------------------|--------------|-------------|-------------|
| smc240.pcaac384                | 0.032098967  | 0.072472127 | 0.658526026 |
| pcaec405.arginine              | -0.019814644 | 0.044739935 | 0.658547458 |
| ornithine.c162                 | -0.039923428 | 0.090150981 | 0.658572152 |
| c102.pcaac401                  | -0.001637254 | 0.003697957 | 0.658648119 |
| pcaac422.c8                    | 0.020517422  | 0.046342491 | 0.658655991 |
| histidine.pcaec385             | 0.026495099  | 0.059865451 | 0.65876935  |
| lysopcac170.pcaec301           | -0.019240688 | 0.043489956 | 0.658885284 |
| c182.pcaac401                  | -0.001201984 | 0.00271728  | 0.658934748 |
| pcaec445.lysopcac182           | -0.017526173 | 0.039629675 | 0.659006617 |
| pcaac380.pcaec444              | 0.06252983   | 0.141416626 | 0.659065263 |
| pcaac366.smohc161              | -0.007577603 | 0.01713854  | 0.659086398 |
| smohc221.glutamicacid          | 0.012033786  | 0.027225003 | 0.659177261 |
| alphaaminoadipicacid.pcaec420  | -0.012497322 | 0.028275221 | 0.659194434 |
| pcaac342.pcaac364              | -0.042730508 | 0.096695175 | 0.65925153  |
| lysopcac161.pcaac386           | -0.011837085 | 0.026787545 | 0.659267245 |
| leucine.arginine               | -0.030733636 | 0.069551713 | 0.65927146  |
| kynurenine.methionine          | -0.015898434 | 0.035980848 | 0.659288475 |
| histidine.threonine            | 0.008829003  | 0.019991373 | 0.659445559 |
| c4.lysopcac160                 | 0.003408455  | 0.007722173 | 0.659629764 |
| smohc222.pcaec403              | -0.010990383 | 0.02490072  | 0.659642335 |
| pcaac281.smc161                | 0.057229549  | 0.129666052 | 0.659647403 |
| pcaec340.acetylmethionine      | 0.012121546  | 0.027467387 | 0.659686572 |
| pcaec446.pcaec343              | -0.034133435 | 0.077351423 | 0.659707824 |
| pcaec422.c142                  | 0.01866641   | 0.042302137 | 0.659717511 |
| smc240.c14                     | -0.012246235 | 0.027760579 | 0.659808779 |
| arginine.pcaac320              | 0.028939493  | 0.06560347  | 0.65981609  |
| pcaec386.smc160                | -0.076860574 | 0.174255363 | 0.659850297 |
| h1.pcaec341                    | 0.031570964  | 0.071605894 | 0.659981113 |
| pcaec402.acetylmethionine      | -0.014528967 | 0.032985096 | 0.660290468 |
| pcaac380.pcaac420              | -0.042987723 | 0.097608738 | 0.660335323 |
| pcaac404.pcaec343              | 0.032901395  | 0.074712902 | 0.660362456 |
| pcaec403.lysopcac181           | -0.03268292  | 0.074221972 | 0.660384679 |
| lysopcac140.pcaac386           | -0.009010257 | 0.020462974 | 0.660399281 |
| pcaec362.leucine               | -0.008005867 | 0.018185157 | 0.660455775 |
| h1.pcaac425                    | -0.020304439 | 0.046138389 | 0.660574922 |
| arginine.pcaac381              | 0.014399971  | 0.032732385 | 0.660680773 |
| methioninesulfoxide.lysopcac20 | 0.074484247  | 0.169310674 | 0.660683599 |
| pcaec340.lysopcac180           | -0.027601398 | 0.062743426 | 0.660696216 |
| arginine.pcaac365              | 0.024891582  | 0.056585463 | 0.660707365 |
| c5.pcaac384                    | -0.023775713 | 0.054052123 | 0.660727002 |
| asymmetricdimethylarginine.pca | -0.012943877 | 0.029430108 | 0.660762319 |
| lysopcac170.pcaac422           | 0.050473139  | 0.114766938 | 0.660783539 |
| lysopcac181.threonine          | -0.021157225 | 0.048110474 | 0.660801438 |

|                            |              |             |             |
|----------------------------|--------------|-------------|-------------|
| isoleucine.smc160          | 0.020978759  | 0.047727207 | 0.660951602 |
| pcaac361.acetylnithoine    | 0.010217518  | 0.023245134 | 0.660951915 |
| pcaac422.c16               | 0.009831066  | 0.022367041 | 0.66096749  |
| c182.methioninesulfoxide   | 0.00556485   | 0.012662742 | 0.661016034 |
| lysopcac281.c182           | -0.017038363 | 0.038770951 | 0.661019164 |
| pcaec362.pcaac322          | -0.032104688 | 0.073060233 | 0.661044027 |
| pcaac363.pcaac300          | -0.049295926 | 0.112188464 | 0.661061994 |
| c182.pcaac322              | -0.025390513 | 0.057785544 | 0.661069712 |
| pcaac380.pcaac322          | -0.028702312 | 0.065340518 | 0.661155948 |
| pcaec444.lysopcac170       | -0.014533133 | 0.033094517 | 0.661251789 |
| pcaec300.c0                | 0.00017437   | 0.000397082 | 0.661260689 |
| pcaec380.c16               | 0.010765802  | 0.0245181   | 0.661283671 |
| lysopcac161.pcaac240       | -0.008862754 | 0.020198171 | 0.661504968 |
| putrescine.c182            | -0.013579555 | 0.030949928 | 0.661527435 |
| pcaac366.pcaec445          | -0.035762502 | 0.081520927 | 0.661576435 |
| pcaec386.c8                | -0.023764836 | 0.054182874 | 0.66163924  |
| c0.pcaac401                | -0.00074487  | 0.00169828  | 0.6616404   |
| lysopcac280.glycine        | 0.011005036  | 0.025097338 | 0.661718799 |
| lysopcac203.pcaec402       | -0.014412076 | 0.032871078 | 0.661756161 |
| glutamine.asparagine       | -0.007534098 | 0.017185349 | 0.661785139 |
| glutamine.arginine         | 0.01522868   | 0.034740252 | 0.661816959 |
| pcaec363.lysopcac180       | 0.03786308   | 0.086382885 | 0.66184693  |
| ornithine.kynurenine       | -0.001600477 | 0.003651779 | 0.661878471 |
| h1.c12                     | -0.008575741 | 0.019573653 | 0.661984432 |
| pcaac403.taurine           | 0.041373111  | 0.094443498 | 0.662023574 |
| smc161.pcaac422            | -0.015617773 | 0.03565135  | 0.662025748 |
| pcaec301.pcaac425          | 0.034467457  | 0.078681004 | 0.662028504 |
| pcaec381.pcaec383          | -0.089661345 | 0.204726016 | 0.662106642 |
| lysine.pcaac385            | 0.01274817   | 0.02911518  | 0.66218235  |
| pcaac362.c162              | 0.032362723  | 0.073921551 | 0.662222012 |
| glycine.c0                 | 0.000266142  | 0.000607921 | 0.662227847 |
| pcaac403.asparticacid      | 0.026445184  | 0.060408692 | 0.662241566 |
| smc240.c101                | 0.006940317  | 0.015857146 | 0.662309271 |
| smc202.transhydroxyproline | 0.013551882  | 0.030963442 | 0.662312123 |
| prolinr.pcaec421           | -0.004146644 | 0.00947775  | 0.662427913 |
| pcaec384.pcaec382          | -0.015538096 | 0.035520957 | 0.66248498  |
| pcaec343.pcaec423          | -0.011119467 | 0.025423754 | 0.662535129 |
| glutamicacid.pcaac401      | 0.002773021  | 0.006341348 | 0.662588123 |
| pcaac421.pcaac401          | -0.002523357 | 0.005770912 | 0.662615281 |
| arginine.pcaac300          | -0.022789886 | 0.052122164 | 0.662625889 |
| pcaac403.pcaec343          | 0.04126336   | 0.094377532 | 0.662643177 |
| pcaac380.c2                | -0.019982274 | 0.045710565 | 0.662692437 |
| smohc221.taurine           | 0.013450239  | 0.030769544 | 0.662706547 |

|                            |              |             |             |
|----------------------------|--------------|-------------|-------------|
| pcaec363.smc181            | -0.009106829 | 0.020834514 | 0.662724842 |
| serotonin.ornithine        | 0.036580699  | 0.083689112 | 0.66272541  |
| pcaec365.pcaac401          | -0.000971681 | 0.002223709 | 0.662825253 |
| pcaac322.c141              | -0.019364014 | 0.044315788 | 0.662831785 |
| pcaec446.pcaac360          | 0.017094479  | 0.039129616 | 0.662894842 |
| pcaac424.lysopcac181       | -0.036884535 | 0.084434154 | 0.662912399 |
| pcaac405.lysopcac180       | 0.027789282  | 0.063617319 | 0.662930004 |
| c4.leucine                 | -0.003590401 | 0.008219545 | 0.662934963 |
| pcaec343.pcaec386          | -0.004962528 | 0.011362603 | 0.662985929 |
| c51.pcaec343               | 0.027549676  | 0.063081513 | 0.662993721 |
| pcaac402.pcaac401          | -0.005918749 | 0.013553118 | 0.663010946 |
| c16.pcaac323               | -0.056060843 | 0.128413977 | 0.66311526  |
| pcaec384.smohc161          | -0.011094829 | 0.025422106 | 0.663215781 |
| lysopcac160.pcaac401       | -0.00099748  | 0.002285746 | 0.663239634 |
| pcaac343.pcaac425          | 0.043072621  | 0.098710594 | 0.663267827 |
| smc181.c8                  | -0.019952982 | 0.045737581 | 0.663342648 |
| pcaac320.arginine          | 0.030054348  | 0.06890842  | 0.663415046 |
| c2.pcaac343                | -0.009555591 | 0.021909782 | 0.663426331 |
| smohc222.pcaac401          | -0.001953283 | 0.004479411 | 0.66348103  |
| c141.pcaec361              | 0.004719277  | 0.010824162 | 0.663526805 |
| smc240.methioninesulfoxide | 0.004223703  | 0.00968847  | 0.663558073 |
| pcaec403.pcaac401          | -0.002012218 | 0.004617618 | 0.663689729 |
| pcaac362.smc241            | -0.017153577 | 0.039385866 | 0.663865927 |
| smohc161.pcaec341          | 0.045846199  | 0.105290329 | 0.663938113 |
| c12.pcaec341               | -0.039071705 | 0.089732602 | 0.663940105 |
| c5.pcaec444                | -0.053839105 | 0.123654012 | 0.663956425 |
| alanine.pcaac364           | 0.024482051  | 0.056253052 | 0.664092791 |
| lysopcac180.pcaac240       | -0.008166964 | 0.018767485 | 0.664126994 |
| pcaec363.smc161            | -0.027641201 | 0.063520785 | 0.664136789 |
| pcaac422.pcaec404          | 0.013433005  | 0.03087     | 0.664140075 |
| pcaac381.lysopcac203       | -0.030286526 | 0.069608879 | 0.664177583 |
| pcaec424.pcaac403          | -0.00971988  | 0.022340547 | 0.66419045  |
| asparticacid.pcaec340      | 0.017827442  | 0.04099593  | 0.664349122 |
| leucine.pcaec321           | 0.009025982  | 0.020761533 | 0.664431207 |
| lysopcac181.pcaec363       | 0.011379381  | 0.026180291 | 0.664497097 |
| h1.pcaec446                | -0.033527712 | 0.077143872 | 0.664527312 |
| smohc222.acetylnithoine    | -0.031162233 | 0.071703217 | 0.66453641  |
| pcaac365.smc241            | 0.063370377  | 0.145838172 | 0.664590646 |
| c51dc.smc160               | 0.037796783  | 0.087013858 | 0.664698356 |
| lysopcac280.pcaec405       | -0.044946436 | 0.103491829 | 0.66475429  |
| lysine.pcaac365            | 0.021309888  | 0.049070812 | 0.664776943 |
| pcaec443.pcaac401          | -0.002397191 | 0.005520394 | 0.664795336 |
| pcaac425.pcaac300          | 0.024071165  | 0.055440677 | 0.664841638 |

|                                |              |             |             |
|--------------------------------|--------------|-------------|-------------|
| pcaec363.pcaec445              | -0.020011657 | 0.046094644 | 0.664867713 |
| lysopcac140.transhydroxyprolin | 0.024806403  | 0.057147067 | 0.664913134 |
| pcaec363.pcaac401              | -0.000983498 | 0.002265867 | 0.664935463 |
| c141oh.pcaac383                | 0.003914121  | 0.009017812 | 0.664939749 |
| serine.lysopcac280             | -0.006774066 | 0.015607906 | 0.66496023  |
| pcaec385.c102                  | 0.011829129  | 0.027257042 | 0.664982486 |
| h1.pcaac401                    | 0.000912487  | 0.002103022 | 0.665048389 |
| smohc141.smc180                | -0.054131259 | 0.124757673 | 0.665049938 |
| pcaac341.creatinine            | -0.003284532 | 0.007570985 | 0.66509316  |
| pcaec406.pcaec380              | -0.027312279 | 0.062956569 | 0.665096245 |
| smohc221.pcaec423              | 0.011767396  | 0.027136116 | 0.665229518 |
| c182.c0                        | 0.000319169  | 0.000736071 | 0.66525258  |
| pcaec363.methioninesulfoxide   | 0.005698942  | 0.013143277 | 0.66526     |
| smc240.pcaac320                | -0.025572626 | 0.058981626 | 0.665283121 |
| pcaec360.pcaec341              | -0.03416107  | 0.078810994 | 0.665365514 |
| acetylmithoine.lysopcac281     | -0.009446074 | 0.021795132 | 0.665403706 |
| c142.pcaac402                  | 0.009340021  | 0.02155577  | 0.66548146  |
| pcaec404.pcaac424              | 0.013875338  | 0.032025987 | 0.665512721 |
| pcaac421.pcaac380              | -0.048097064 | 0.111020956 | 0.665532575 |
| pcaac424.pcaec446              | 0.039770207  | 0.091800442 | 0.665532955 |
| pcaac424.pcaac401              | -0.002051674 | 0.004737025 | 0.665612748 |
| pcaac401.pcaec404              | 0.01927477   | 0.044507967 | 0.665649778 |
| c18.c4                         | -0.016430901 | 0.037946532 | 0.665694688 |
| pcaec342.pcaec383              | -0.031181558 | 0.072014937 | 0.665704849 |
| pcaac364.pcaec384              | 0.013363143  | 0.030864625 | 0.665724783 |
| smc181.glycine                 | -0.0226367   | 0.052293837 | 0.665786214 |
| smc241.c162                    | 0.038356022  | 0.088623422 | 0.665842233 |
| lysopcac203.pcaac343           | -0.020597235 | 0.047592139 | 0.665850426 |
| pcaac426.pcaec380              | -0.031540212 | 0.072900637 | 0.66595183  |
| c5.smc161                      | 0.064711971  | 0.14957762  | 0.665962863 |
| pcaac420.lysopcac280           | -0.003399461 | 0.007857862 | 0.665971758 |
| c8.glutamicacid                | -0.026671584 | 0.061655125 | 0.665990575 |
| pcaac240.pcaac360              | 0.035618595  | 0.082345939 | 0.666023087 |
| smc180.prolinr                 | 0.022801629  | 0.052718547 | 0.666046298 |
| c51.pcaac401                   | -0.001169052 | 0.002703793 | 0.666148817 |
| pcaec405.pcaec386              | 0.004162643  | 0.009628579 | 0.666187398 |
| pcaec401.acetylmithoine        | -0.017143162 | 0.039656881 | 0.666212353 |
| pcaec445.smohc161              | 0.005990423  | 0.013858015 | 0.666223833 |
| serine.smc241                  | -0.006484399 | 0.015002627 | 0.666262813 |
| pcaec365.isoleucine            | 0.01009035   | 0.023346985 | 0.666282292 |
| pcaac380.pcaec343              | 0.051646312  | 0.119506783 | 0.666302979 |
| pcaac381.pcaec341              | -0.016593402 | 0.038400173 | 0.666335093 |
| smc181.smc180                  | 0.051614035  | 0.119474084 | 0.666413096 |

|                                |              |             |             |
|--------------------------------|--------------|-------------|-------------|
| lysopcac161.pcaec382           | 0.004859674  | 0.011249222 | 0.666419949 |
| leucine.lysopcac280            | -0.005041939 | 0.011674004 | 0.666496999 |
| pcaec445.threonine             | -0.009394891 | 0.021759907 | 0.666600139 |
| lysopcac161.smc260             | 0.01274633   | 0.029543083 | 0.66682019  |
| pcaac323.pcaec446              | -0.013660396 | 0.031661888 | 0.666822261 |
| pcaac240.isoleucine            | 0.008477752  | 0.01965136  | 0.666849896 |
| lysopcac160.pcaac403           | -0.01143159  | 0.026499955 | 0.666869062 |
| pcaec343.pcaec402              | 0.021255541  | 0.049275731 | 0.66688521  |
| pcaac406.lysopcac204           | 0.015286928  | 0.035448039 | 0.666965225 |
| pcaec322.methioninesulfoxide   | 0.007594162  | 0.017615573 | 0.667069572 |
| c5.pcaac363                    | 0.008994884  | 0.020868784 | 0.667130509 |
| pcaac404.glycine               | 0.049490752  | 0.114827884 | 0.667146167 |
| lysopcac161.arginine           | 0.02495793   | 0.057908813 | 0.66715537  |
| glutamicacid.threonine         | 0.01583739   | 0.036747014 | 0.667157065 |
| pcaac383.pcaec385              | -0.027191775 | 0.063098131 | 0.6671862   |
| lysopcac204.pcaac323           | 0.035462713  | 0.082317964 | 0.667289641 |
| lysopcac181.transhydroxyprolin | -0.025420308 | 0.059012424 | 0.667318414 |
| pcaac300.acetylnithoine        | 0.005259881  | 0.012211917 | 0.667350963 |
| pcaec422.smc161                | -0.057042958 | 0.132443655 | 0.667366236 |
| alanine.pcaac420               | 0.047880666  | 0.111196796 | 0.667440308 |
| pcaec424.pcaac322              | -0.031295006 | 0.072689939 | 0.667488621 |
| c102.lysopcac140               | -0.001037381 | 0.002409675 | 0.667503535 |
| putrescine.pcaac240            | 0.008684362  | 0.020177886 | 0.667588182 |
| pcaac406.taurine               | 0.019747027  | 0.045901932 | 0.667725875 |
| c142.pcaec404                  | -0.012021381 | 0.027944875 | 0.667739214 |
| c3.pcaac401                    | -0.000983978 | 0.002287536 | 0.667764217 |
| pcaac342.pcaac344              | -0.040732368 | 0.09473035  | 0.667884135 |
| pcaac300.pcaac406              | -0.021925147 | 0.050991843 | 0.667890396 |
| smohc241.pcaec360              | -0.004507012 | 0.010483061 | 0.66792001  |
| pcaac422.pcaac320              | -0.024654635 | 0.057349454 | 0.667942491 |
| smohc141.smc240                | 0.015214041  | 0.035390226 | 0.667948261 |
| pcaec361.methioninesulfoxide   | 0.006661183  | 0.015495766 | 0.667964721 |
| c162.pcaac322                  | -0.02207928  | 0.05139082  | 0.668136342 |
| leucine.pcaac404               | 0.008030266  | 0.018696179 | 0.668224139 |
| c2.lysopcac160                 | 0.004555158  | 0.010607288 | 0.668280153 |
| pcaac365.pcaac343              | -0.014005746 | 0.032627982 | 0.668411473 |
| pcaac381.pcaec382              | 0.004242096  | 0.009882503 | 0.668413233 |
| pcaec365.pcaac421              | -0.019073468 | 0.044453916 | 0.668552348 |
| pcaec322.smc240                | -0.017300193 | 0.040321858 | 0.668558966 |
| pcaac380.serine                | 0.027283157  | 0.063593723 | 0.668580513 |
| smc261.c141                    | 0.015133857  | 0.035282327 | 0.668643592 |
| pcaac240.c141                  | 0.036738576  | 0.085653481 | 0.668654418 |
| pcaec364.lysopcac280           | 0.004867463  | 0.011349011 | 0.668677811 |

|                                 |              |             |             |
|---------------------------------|--------------|-------------|-------------|
| pcaac406.phenylalanine          | -0.013200798 | 0.030785718 | 0.668745049 |
| c10.pcaac361                    | 0.019016892  | 0.044362525 | 0.668836511 |
| pcaac384.methioninesulfoxide    | 0.005957759  | 0.0138995   | 0.668864828 |
| methioninesulfoxide.glutamicaci | -0.047553965 | 0.110948416 | 0.668877832 |
| smc241.transhydroxyproline      | 0.018090024  | 0.042206983 | 0.668885564 |
| isoleucine.pcaec402             | 0.025520736  | 0.059552096 | 0.668927622 |
| c12.pcaec322                    | 0.017994344  | 0.042003766 | 0.669033897 |
| c3.smohc161                     | -0.00633539  | 0.01478912  | 0.669045903 |
| pcaec380.c4                     | -0.008786413 | 0.020512775 | 0.669077291 |
| pcaac402.c4                     | -0.013730558 | 0.032063046 | 0.669151623 |
| pcaec402.pcaac401               | -0.001333955 | 0.003116141 | 0.669265638 |
| pcaac341.pcaec362               | -0.020188251 | 0.047161983 | 0.669278178 |
| prolinr.smc202                  | -0.021101993 | 0.04930201  | 0.669312395 |
| pcaac321.pcaec401               | 0.024226719  | 0.056617709 | 0.669395801 |
| pcaec381.pcaac404               | -0.010701871 | 0.02501324  | 0.66943339  |
| pcaec364.pcaac401               | -0.000788864 | 0.001844663 | 0.669579777 |
| kynurenine.pcaac401             | 0.001156574  | 0.002704722 | 0.66960442  |
| smc202.c142                     | 0.01556653   | 0.036411117 | 0.669670846 |
| phenylalanine.c2                | 0.030377404  | 0.071057958 | 0.669685069 |
| pcaec340.pcaec401               | 0.021661476  | 0.05068303  | 0.669765487 |
| pcaec420.pcaec321               | -0.00589002  | 0.013783269 | 0.669809018 |
| pcaac344.acetylorlithoine       | 0.005107489  | 0.011954948 | 0.669883935 |
| smc202.pcaec446                 | -0.01087168  | 0.025448769 | 0.66990529  |
| glycine.lysopcac160             | 0.008115639  | 0.019002163 | 0.669984025 |
| pcaec444.taurine                | -0.018897888 | 0.044262089 | 0.670082861 |
| pcaec360.c16                    | -0.034412418 | 0.080605601 | 0.670105281 |
| pcaac426.pcaec386               | 0.005928213  | 0.013890213 | 0.670201749 |
| leucine.pcaac425                | -0.042991591 | 0.100759088 | 0.670284296 |
| pcaec443.lysine                 | 0.042190416  | 0.098881398 | 0.670284349 |
| pcaec383.pcaac401               | -0.001596357 | 0.003741943 | 0.670331799 |
| pcaec402.c141                   | 0.031654645  | 0.074206373 | 0.670357858 |
| pcaec364.pcaec341               | 0.051483576  | 0.12073339  | 0.670468432 |
| asparticacid.c0                 | -0.000294424 | 0.000690454 | 0.670470687 |
| glutamicacid.methionine         | -0.014202013 | 0.033306686 | 0.670484721 |
| pcaec424.pcaac401               | -0.001242987 | 0.002915378 | 0.670518224 |
| pcaac405.phenylalanine          | -0.012256175 | 0.0287527   | 0.670586157 |
| smohc241.histidine              | -0.024328873 | 0.057075264 | 0.670587759 |
| creatinine.pcaac424             | 0.006656143  | 0.015615576 | 0.670594502 |
| methionine.lysopcac181          | 0.01530716   | 0.035911298 | 0.67059528  |
| smc241.pcaec340                 | -0.03159818  | 0.074138822 | 0.670628905 |
| lysopcac161.c141                | 0.015280069  | 0.035861082 | 0.670710549 |
| h1.asparagine                   | 0.00854807   | 0.020064799 | 0.670759518 |
| pcaac360.pcaec341               | -0.028167762 | 0.066134463 | 0.670837044 |

|                              |              |             |             |
|------------------------------|--------------|-------------|-------------|
| lysopcac281.pcaac385         | 0.022006011  | 0.051673091 | 0.670870987 |
| serine.spermidine            | -0.030186396 | 0.070907145 | 0.670981915 |
| pcaac361.pcaac380            | 0.021402756  | 0.050275945 | 0.67099033  |
| leucine.pcaac240             | -0.00746792  | 0.017551251 | 0.671145566 |
| pcaac384.c2                  | 0.029706193  | 0.06984673  | 0.671281353 |
| putrescine.lysine            | 0.024272946  | 0.057077874 | 0.671314257 |
| smohc161.pcaac401            | -0.001052074 | 0.002475404 | 0.671495525 |
| pcaac281.smc261              | 0.02601754   | 0.061245895 | 0.671645526 |
| lysopcac161.c18              | -0.041904698 | 0.098669604 | 0.671723706 |
| pcaac385.pcaec341            | 0.029977533  | 0.070599021 | 0.671782105 |
| c142.pcaec384                | 0.008968155  | 0.021123555 | 0.67182558  |
| alanine.c162                 | -0.041067659 | 0.096751818 | 0.671893309 |
| lysine.pcaac321              | 0.023611145  | 0.055627468 | 0.671902597 |
| pcaec341.histidine           | -0.024121062 | 0.056836982 | 0.671946904 |
| c3.pcaec421                  | 0.000428205  | 0.001009203 | 0.672012342 |
| c4.threonine                 | -0.017275966 | 0.040733126 | 0.672139372 |
| c14.serotonin                | 0.019481843  | 0.045934286 | 0.672140444 |
| lysine.pcaac420              | 0.028884847  | 0.068105827 | 0.672145615 |
| pcaec421.pcaec420            | -0.012187029 | 0.028735321 | 0.672148468 |
| pcaac383.pcaec401            | -0.020685573 | 0.048778978 | 0.672181804 |
| creatinine.pcaec321          | -0.004320462 | 0.010188759 | 0.672200246 |
| pcaec341.c51dc               | -0.048071473 | 0.113381138 | 0.67224448  |
| acetylmethionine.lysopcac181 | 0.027848946  | 0.065686256 | 0.672253266 |
| isoleucine.asparticacid      | 0.009187959  | 0.021673932 | 0.672290846 |
| pcaec446.pcaec321            | 0.026520892  | 0.062567218 | 0.672319285 |
| pcaac341.pcaec422            | -0.00652246  | 0.015389676 | 0.67236143  |
| pcaac320.pcaac300            | 0.044213537  | 0.104351531 | 0.672450528 |
| c162.pcaac401                | -0.00115079  | 0.002716086 | 0.672453292 |
| pcaec422.smc160              | -0.024404685 | 0.057604431 | 0.6724783   |
| pcaec405.prolinr             | 0.01185409   | 0.027987874 | 0.672562747 |
| c102.pcaec365                | -0.012661407 | 0.029895698 | 0.672580517 |
| pcaec446.smc261              | 0.019398204  | 0.045818255 | 0.672687169 |
| pcaec300.pcaec422            | -0.015995337 | 0.037787732 | 0.672744211 |
| c8.pcaec360                  | -0.004496862 | 0.010623795 | 0.672753232 |
| c14.c102                     | 0.013063354  | 0.030866678 | 0.672799353 |
| smc240.glutamine             | 0.013782657  | 0.032573967 | 0.672872065 |
| pcaec443.pcaec446            | 0.034709866  | 0.082047317 | 0.672924338 |
| pcaec364.methionine          | -0.011638841 | 0.027514641 | 0.672954602 |
| c4.pcaec446                  | -0.033872425 | 0.080083379 | 0.672984352 |
| pcaac322.pcaec322            | 0.023671961  | 0.055977201 | 0.673041656 |
| isoleucine.c8                | -0.013012104 | 0.030771599 | 0.673059782 |
| pcaec340.serotonin           | -0.038651783 | 0.091406032 | 0.673061771 |
| pcaac426.c16                 | 0.011576018  | 0.027377638 | 0.673084051 |

|                        |              |             |             |
|------------------------|--------------|-------------|-------------|
| pcaac384.lysopcac160   | -0.011354448 | 0.026854631 | 0.673095665 |
| asparagine.smc161      | -0.042416169 | 0.100370013 | 0.673251101 |
| pcaec444.lysine        | 0.036881785  | 0.087281497 | 0.673277819 |
| pcaec362.smc161        | 0.039903923  | 0.094434061 | 0.673279811 |
| pcaac422.pcaac360      | -0.019169974 | 0.0453745   | 0.673334521 |
| pcaac424.putrescine    | -0.040844508 | 0.096689853 | 0.673374823 |
| phenylalanine.glycine  | -0.011476544 | 0.027170847 | 0.673406554 |
| c102.pcaec364          | -0.010375879 | 0.024565407 | 0.673411534 |
| pcaec421.pcaac384      | 0.020618336  | 0.048819981 | 0.673443341 |
| c142.methionine        | -0.011418934 | 0.027040566 | 0.673476075 |
| c102.c141              | 0.02464694   | 0.058376909 | 0.673538268 |
| pcaac300.c51dc         | -0.045884912 | 0.108691072 | 0.673570735 |
| smc260.smohc241        | 0.023801186  | 0.056386325 | 0.673606994 |
| lysopcac180.pcaac426   | -0.026761138 | 0.06340345  | 0.673630425 |
| c51dc.pcaec420         | -0.028713448 | 0.068030859 | 0.673639126 |
| pcaac403.pcaac380      | 0.034821531  | 0.082507406 | 0.673656438 |
| asparagine.c5          | -0.005428036 | 0.01286198  | 0.673670599 |
| glutamicacid.c14       | -0.038866031 | 0.092134221 | 0.67380197  |
| lysopcac170.c162       | 0.037404025  | 0.088671252 | 0.673811674 |
| putrescine.pcaac404    | 0.003263421  | 0.007737935 | 0.673873587 |
| pcaec402.pcaec363      | 0.020603696  | 0.04885662  | 0.673892151 |
| lysopcac204.spermidine | -0.030407205 | 0.07212228  | 0.673973218 |
| smc161.lysopcac180     | -0.02688799  | 0.063781268 | 0.674002814 |
| pcaec385.asparticacid  | 0.027412579  | 0.065071552 | 0.674219399 |
| pcaac240.pcaec386      | 0.009302628  | 0.022086375 | 0.674274155 |
| c10.pcaac321           | 0.011370341  | 0.027002527 | 0.674353381 |
| smc240.pcaac322        | -0.0362357   | 0.08607869  | 0.674443813 |
| smc181.pcaac386        | 0.004867554  | 0.011564886 | 0.674494365 |
| pcaac365.pcaac360      | 0.019655672  | 0.046703313 | 0.674514979 |
| pcaec340.smc180        | -0.020659367 | 0.049091954 | 0.674538646 |
| smc181.lysopcac160     | -0.007527513 | 0.017887431 | 0.674540868 |
| c8.pcaec381            | 0.023784959  | 0.056521038 | 0.674548819 |
| pcaac361.pcaac240      | -0.007485102 | 0.01778923  | 0.674585319 |
| pcaec300.pcaac386      | 0.005077831  | 0.012068117 | 0.674586635 |
| pcaac322.histidine     | 0.025337876  | 0.060229802 | 0.674643041 |
| pcaec382.pcaec322      | -0.032458469 | 0.077168127 | 0.674691523 |
| c2.c4                  | -0.017012811 | 0.040447215 | 0.674693378 |
| pcaac385.pcaec383      | 0.031862962  | 0.075755818 | 0.674705581 |
| pcaec423.pcaac380      | -0.033616968 | 0.079994575 | 0.674968079 |
| spermidine.pcaac281    | -0.005439662 | 0.012944909 | 0.674985752 |
| c5.pcaec384            | 0.025415564  | 0.060487083 | 0.67501102  |
| pcaec445.smohc241      | 0.033824935  | 0.080510119 | 0.675046693 |
| pcaac384.taurine       | 0.009283897  | 0.022099208 | 0.675069895 |



|                                |              |             |             |
|--------------------------------|--------------|-------------|-------------|
| ornithine.pcaac240             | -0.004029802 | 0.009592747 | 0.675078975 |
| c51dc.acetylmethionine         | 0.058189581  | 0.1385277   | 0.675101603 |
| isoleucine.pcaac361            | 0.022767447  | 0.054202896 | 0.67511342  |
| glycine.c142                   | 0.023523528  | 0.056014338 | 0.675175858 |
| c8.pcaac424                    | 0.003668433  | 0.008737138 | 0.675240541 |
| c4.pcaac364                    | -0.015160608 | 0.036108314 | 0.675241984 |
| phenylalanine.smc260           | 0.012330603  | 0.029369489 | 0.675257129 |
| h1.lysopcac161                 | 0.020273271  | 0.048290881 | 0.675277706 |
| c141.pcaec364                  | -0.009684807 | 0.023072102 | 0.675316393 |
| c51.pcaac320                   | 0.029320444  | 0.069870507 | 0.675405943 |
| c51dc.c3                       | -0.03557364  | 0.084799506 | 0.675505704 |
| pcaec406.pcaec386              | -0.012086092 | 0.028824443 | 0.675653551 |
| glutamine.pcaec384             | 0.013721207  | 0.032726008 | 0.675671611 |
| putrescine.smc161              | -0.032941525 | 0.078574214 | 0.675696698 |
| pcaac383.pcaac402              | -0.013566555 | 0.032360101 | 0.675699472 |
| pcaac323.threonine             | -0.018174384 | 0.043358892 | 0.675754484 |
| lysopcac203.histidine          | 0.035678974  | 0.085131635 | 0.675796803 |
| pcaac341.c141                  | 0.01737155   | 0.041452026 | 0.675816915 |
| c10.pcaec383                   | -0.022455154 | 0.053585497 | 0.675833812 |
| c18.smohc161                   | 0.006077933  | 0.014505544 | 0.675866826 |
| ornithine.c102                 | 0.006591862  | 0.015733456 | 0.675893459 |
| pcaec422.pcaac425              | 0.048320966  | 0.115350597 | 0.675941437 |
| pcaac365.pcaac361              | -0.034697759 | 0.08284919  | 0.676013589 |
| smohc221.serotonin             | -0.040018557 | 0.095556372 | 0.676021594 |
| pcaec402.smohc161              | 0.007756858  | 0.018523819 | 0.676054265 |
| pcaac341.pcaac323              | 0.029906417  | 0.071422331 | 0.676071804 |
| pcaac300.smc180                | -0.004598561 | 0.010984662 | 0.676138678 |
| pcaec384.smc261                | -0.019745492 | 0.047173276 | 0.676183178 |
| asymmetricdimethylarginine.pca | -0.002639061 | 0.006307912 | 0.676329386 |
| pcaec384.pcaec420              | -0.010087021 | 0.024111586 | 0.676348144 |
| pcaac320.pcaec402              | -0.017065583 | 0.040808022 | 0.676461615 |
| glutamicacid.pcaac402          | -0.041388468 | 0.098979499 | 0.676490747 |
| c14.acetylmethionine           | -0.043812836 | 0.104817316 | 0.676607139 |
| asparticacid.smc241            | -0.009482656 | 0.02268672  | 0.676614178 |
| lysopcac204.pcaec301           | 0.015384797  | 0.036812981 | 0.676661579 |
| lysopcac182.alanine            | -0.011464926 | 0.027450233 | 0.676847918 |
| c102.smohc241                  | 0.034813976  | 0.083362693 | 0.676878325 |
| asparticacid.pcaac401          | -0.001678908 | 0.004020931 | 0.676935494 |
| smc261.pcaac364                | 0.025936248  | 0.062133867 | 0.677020787 |
| pcaec322.lysopcac204           | -0.016101671 | 0.038578632 | 0.677059109 |
| pcaac361.smohc221              | 0.021050336  | 0.050442551 | 0.677102654 |
| pcaac342.pcaec403              | -0.0299774   | 0.071840392 | 0.677128409 |
| pcaec424.pcaec445              | -0.039123559 | 0.09378322  | 0.677206949 |

|                              |              |             |             |
|------------------------------|--------------|-------------|-------------|
| pcaec362.lysopcac281         | -0.012986926 | 0.031131392 | 0.677210715 |
| pcaac422.acetylorlornithoine | -0.018875977 | 0.04525613  | 0.67726384  |
| pcaac281.lysopcac170         | 0.005604156  | 0.013437918 | 0.677301535 |
| pcaec381.leucine             | 0.002445139  | 0.005866449 | 0.677476719 |
| smohc222.c18                 | 0.01446676   | 0.034710861 | 0.677492318 |
| pcaec380.pcaec420            | -0.011828473 | 0.028382048 | 0.677506988 |
| methioninesulfoxide.smc261   | 0.016177915  | 0.038819903 | 0.67751878  |
| serotonin.lysopcac180        | 0.044356211  | 0.106435769 | 0.677519667 |
| pcaac300.pcaec386            | 0.00462621   | 0.011101215 | 0.67752805  |
| pcaec422.pcaec405            | -0.046713038 | 0.112166069 | 0.677722844 |
| c51dc.c18                    | -0.018220256 | 0.043759023 | 0.677785663 |
| lysopcac140.pcaec360         | -0.002297433 | 0.005517848 | 0.677795297 |
| methionine.pcaac421          | 0.008865312  | 0.021296116 | 0.67785089  |
| pcaec360.smc161              | -0.028271698 | 0.067917654 | 0.677867963 |
| pcaec343.pcaac401            | -0.001216755 | 0.002923187 | 0.677883722 |
| c141.pcaac344                | 0.028955943  | 0.06957356  | 0.677920952 |
| phenylalanine.pcaac401       | 0.000706389  | 0.001697281 | 0.677923272 |
| smc161.c4                    | -0.008835934 | 0.021230607 | 0.677923351 |
| pcaac404.pcaac300            | -0.03393622  | 0.081550781 | 0.677961616 |
| pcaac364.pcaac401            | -0.000938942 | 0.002256505 | 0.677984494 |
| serine.c141                  | -0.01458092  | 0.035055446 | 0.678105616 |
| pcaec380.pcaac386            | 0.006682332  | 0.016066414 | 0.678119828 |
| pcaec421.pcaac240            | -0.01076817  | 0.025891879 | 0.678141345 |
| pcaec443.pcaec380            | 0.045141027  | 0.108555757 | 0.678183107 |
| h1.tryptophan                | 0.017375384  | 0.041793152 | 0.678245512 |
| serine.c142                  | -0.017510105 | 0.042128306 | 0.678325559 |
| pcaac401.c16                 | 0.007877818  | 0.018954485 | 0.678340084 |
| pcaac404.pcaac401            | -0.001056091 | 0.002542206 | 0.678482197 |
| pcaac366.pcaac321            | 0.009770656  | 0.023522186 | 0.678513266 |
| pcaec443.pcaec385            | 0.030184537  | 0.072668102 | 0.678516992 |
| pcaec383.pcaac364            | -0.023237395 | 0.055946012 | 0.678532638 |
| pcaec321.pcaac364            | 0.013974869  | 0.033648547 | 0.678558385 |
| pcaac281.pcaac424            | 0.00672854   | 0.016211441 | 0.678755408 |
| lysopcac181.taurine          | 0.020589519  | 0.049623304 | 0.678852183 |
| pcaec342.threonine           | -0.018351481 | 0.044232286 | 0.678872276 |
| smc260.spermidine            | 0.028473168  | 0.068684285 | 0.679118707 |
| pcaac386.pcaec343            | 0.0314043    | 0.075756206 | 0.679123932 |
| pcaec443.c5                  | -0.011599809 | 0.027986505 | 0.67917184  |
| lysopcac181.pcaac401         | -0.001238263 | 0.002987667 | 0.679186859 |
| c0.lysopcac180               | 0.033477652  | 0.080796379 | 0.679268795 |
| smc261.pcaec364              | 0.005645749  | 0.013626826 | 0.679294044 |
| pcaac321.pcaac320            | -0.018194991 | 0.043917584 | 0.679303415 |
| c14.pcaac343                 | -0.012273968 | 0.029627356 | 0.679318287 |

|                                 |              |             |             |
|---------------------------------|--------------|-------------|-------------|
| smohc221.pcaec301               | -0.027081171 | 0.065380254 | 0.679367927 |
| c181.smohc141                   | 0.030331677  | 0.073267674 | 0.679532898 |
| asparagine.pcaac341             | -0.002887739 | 0.006976266 | 0.67956713  |
| lysopcac160.asparagine          | 0.0072013    | 0.017403282 | 0.679675139 |
| pcaac381.lysopcac180            | -0.02616459  | 0.063243645 | 0.679732708 |
| lysopcac180.phenylalanine       | -0.02634332  | 0.063678265 | 0.679745064 |
| pcaac343.pcaec401               | 0.034575743  | 0.083604597 | 0.679841044 |
| lysopcac160.c162                | 0.036875535  | 0.089168444 | 0.679850945 |
| pcaec322.c182                   | 0.027126165  | 0.065608318 | 0.679918882 |
| c5.pcaec301                     | -0.061059558 | 0.147711238 | 0.679981057 |
| leucine.pcaac401                | 0.000323141  | 0.000781877 | 0.680041338 |
| smc241.lysopcac280              | -0.004623325 | 0.01118917  | 0.680108712 |
| pcaac426.pcaac384               | 0.031115293  | 0.075311317 | 0.680138554 |
| pcaac361.pcaac386               | -0.010515243 | 0.025459628 | 0.680240322 |
| c8.pcaec401                     | -0.00457234  | 0.01107086  | 0.680247316 |
| pcaec384.pcaac361               | -0.016967738 | 0.041106827 | 0.680419093 |
| alanine.lysopcac280             | 0.009574091  | 0.02319491  | 0.680422666 |
| smohc241.pcaec401               | -0.011785711 | 0.028555604 | 0.680450744 |
| c51.pcaac360                    | 0.008401727  | 0.020358899 | 0.680485602 |
| pcaac240.pcaac323               | 0.063269532  | 0.153371948 | 0.680600595 |
| lysopcac180.pcaec321            | -0.019005741 | 0.046073575 | 0.680611565 |
| pcaac342.c51                    | -0.046817516 | 0.113515763 | 0.680667598 |
| pcaec362.c0                     | 0.000387447  | 0.000939821 | 0.680795827 |
| pcaac404.pcaec361               | 0.005045741  | 0.012241631 | 0.680852574 |
| isoleucine.pcaac401             | 0.000322245  | 0.00078209  | 0.680960799 |
| kynurenine.c141oh               | -0.056793253 | 0.137842358 | 0.68097166  |
| ornithine.pcaac406              | -0.013454272 | 0.032659394 | 0.681014657 |
| serine.asymmetricdimethylargini | 0.011592159  | 0.028149544 | 0.681124996 |
| pcaec406.c141                   | -0.015778404 | 0.038324862 | 0.681201604 |
| pcaac364.lysopcac170            | -0.004244446 | 0.010312491 | 0.681288295 |
| smohc222.taurine                | 0.012328671  | 0.029956732 | 0.681312962 |
| alanine.lysopcac161             | -0.0220381   | 0.053554964 | 0.681345809 |
| pcaec425.kynurenine             | 0.005725436  | 0.013921199 | 0.681513827 |
| glutamicacid.leucine            | 0.003699114  | 0.008996562 | 0.681590546 |
| smc202.pcaac424                 | 0.003724191  | 0.00905867  | 0.6816277   |
| lysopcac180.c8                  | 0.021447305  | 0.052174946 | 0.681666992 |
| pcaec342.c141                   | 0.013050945  | 0.031757435 | 0.681746049 |
| isoleucine.pcaec446             | -0.018038714 | 0.043900906 | 0.68179065  |
| lysopcac281.pcaac364            | -0.027414626 | 0.06673032  | 0.681841157 |
| lysopcac281.pcaec402            | -0.03830764  | 0.093270034 | 0.68192133  |
| pcaec404.smc202                 | -0.032967632 | 0.080276768 | 0.681952725 |
| smohc221.methioninesulfoxide    | 0.00355226   | 0.008650336 | 0.681970732 |
| smohc161.pcaec404               | 0.009812036  | 0.023894386 | 0.681976679 |

|                          |              |             |             |
|--------------------------|--------------|-------------|-------------|
| c10.pcaac384             | 0.044125318  | 0.107558858 | 0.682268205 |
| c141.kynurenine          | -0.002383523 | 0.005810346 | 0.682285028 |
| pcaec301.pcaec321        | 0.007423859  | 0.01809839  | 0.682304081 |
| pcaac405.pcaac425        | -0.031968695 | 0.07793993  | 0.682321263 |
| pcaec421.asparticacid    | 0.02067623   | 0.050432699 | 0.682463446 |
| asparticacid.lysopcac182 | -0.024860076 | 0.060641576 | 0.682482209 |
| pcaec385.pcaec425        | -0.005754688 | 0.014038175 | 0.682496626 |
| pcaec365.pcaec364        | -0.010779293 | 0.026296681 | 0.682511654 |
| pcaac426.lysopcac140     | -0.000776939 | 0.001895689 | 0.682559447 |
| c141oh.c4                | -0.00777371  | 0.018967467 | 0.682560234 |
| smc261.phenylalanine     | 0.015299256  | 0.037331897 | 0.682580086 |
| pcaac240.pcaec385        | 0.034742344  | 0.084779951 | 0.682596877 |
| pcaec365.pcaac343        | -0.011337143 | 0.027665957 | 0.682602422 |
| pcaec361.creatinine      | -0.002377721 | 0.005803072 | 0.682640395 |
| c0.pcaec385              | 0.020377236  | 0.049734468 | 0.682650845 |
| lysopcac140.c102         | 0.016297514  | 0.039777826 | 0.682656018 |
| pcaec321.phenylalanine   | 0.01706154   | 0.041647892 | 0.68269406  |
| c141oh.c51dc             | -0.052056996 | 0.127077931 | 0.682705274 |
| creatinine.pcaec386      | 0.007461335  | 0.018217014 | 0.682753334 |
| kynurenine.pcaec403      | 0.015880549  | 0.038780258 | 0.682811676 |
| isoleucine.pcaac421      | 0.010669027  | 0.026054146 | 0.682816407 |
| smc181.smc260            | 0.014803824  | 0.036156705 | 0.682859817 |
| pcaec401.smc261          | -0.017839997 | 0.043576443 | 0.682888852 |
| pcaec343.c141            | 0.014811627  | 0.036181351 | 0.682906101 |
| c8.pcaac420              | -0.046338652 | 0.11322521  | 0.682987323 |
| pcaec403.pcaac403        | 0.005835094  | 0.014263293 | 0.683106111 |
| pcaec381.pcaac343        | 0.005046019  | 0.012336052 | 0.683144303 |
| kynurenine.pcaec444      | 0.057065847  | 0.139514056 | 0.683154199 |
| methionine.pcaac341      | 0.006185292  | 0.015125236 | 0.683223338 |
| lysopcac204.alanine      | -0.010883194 | 0.026618781 | 0.683285256 |
| pcaec421.c4              | -0.012873502 | 0.031487965 | 0.683296339 |
| smc241.pcaac380          | -0.027428149 | 0.067095679 | 0.683330924 |
| pcaec421.smc160          | -0.026518856 | 0.064875155 | 0.683348548 |
| c51dc.pcaec385           | 0.029519092  | 0.072230894 | 0.683414952 |
| c181.pcaac365            | -0.015428506 | 0.037762791 | 0.68349778  |
| lysine.pcaac401          | 0.000221877  | 0.000543073 | 0.683501095 |
| c0.pcaac381              | 0.010134866  | 0.024809077 | 0.683533864 |
| pcaac322.phenylalanine   | 0.02027159   | 0.049633218 | 0.683597242 |
| pcaac364.lysopcac160     | -0.036970372 | 0.090518738 | 0.683597274 |
| leucine.pcaec386         | 0.004691145  | 0.011486549 | 0.683615193 |
| c8.pcaac364              | 0.029429365  | 0.07208542  | 0.683722496 |
| smc241.pcaac424          | -0.006305046 | 0.015444934 | 0.683744039 |
| lysopcac180.pcaac321     | 0.018731576  | 0.045887934 | 0.683762182 |

|                                |              |             |             |
|--------------------------------|--------------|-------------|-------------|
| ornithine.smohc221             | -0.021833953 | 0.053494821 | 0.683800163 |
| leucine.pcaac363               | -0.009113136 | 0.022329632 | 0.683823798 |
| pcaac363.isoleucine            | 0.0116555    | 0.028568226 | 0.683919209 |
| pcaac380.c3                    | 0.012278268  | 0.030097518 | 0.68394757  |
| c8.arginine                    | 0.00515833   | 0.012645227 | 0.683964069 |
| pcaac240.smohc141              | -0.012128172 | 0.029736234 | 0.684014341 |
| methioninesulfoxide.smc202     | 0.039494715  | 0.096848919 | 0.68405916  |
| pcaac406.pcaac361              | 0.031760023  | 0.077899134 | 0.684125199 |
| serine.lysine                  | -0.039702606 | 0.09738088  | 0.68412717  |
| glutamine.pcaac401             | 0.000848785  | 0.002082098 | 0.68416088  |
| methionine.pcaac406            | -0.028004276 | 0.068707185 | 0.68421182  |
| alanine.pcaac386               | -0.015589082 | 0.038248015 | 0.684219079 |
| h1.pcaac363                    | -0.007326425 | 0.017977561 | 0.684253646 |
| smc241.smc180                  | -0.00576641  | 0.014153576 | 0.68433749  |
| pcaec423.pcaac320              | 0.050501559  | 0.123958141 | 0.684344117 |
| pcaac320.glycine               | 0.037650718  | 0.092428052 | 0.684385536 |
| lysopcac182.smc161             | 0.025533954  | 0.062690095 | 0.684420104 |
| c3.isoleucine                  | -0.006305618 | 0.015482826 | 0.68444879  |
| pcaac402.c102                  | -0.019037353 | 0.046746652 | 0.68446345  |
| c181.ornithine                 | -0.012341016 | 0.03030672  | 0.684493732 |
| pcaac320.pcaec404              | -0.009963469 | 0.024471863 | 0.684540755 |
| pcaec343.asparagine            | 0.003634567  | 0.008929109 | 0.684608726 |
| pcaac406.c5                    | 0.004273369  | 0.010498612 | 0.684612908 |
| smohc161.smohc221              | 0.037516047  | 0.092176423 | 0.684641233 |
| lysopcac280.lysine             | -0.035781102 | 0.087940699 | 0.684732837 |
| pcaec404.threonine             | -0.013981052 | 0.03436231  | 0.684737173 |
| serotonin.pcaac320             | 0.050179222  | 0.123330637 | 0.684740284 |
| pcaac240.smc202                | -0.033517242 | 0.082381196 | 0.68474905  |
| pcaec362.smc240                | -0.01412355  | 0.034716304 | 0.684769491 |
| prolinr.pcaac401               | 0.000801589  | 0.001971273 | 0.6849106   |
| pcaec364.phenylalanine         | 0.013332743  | 0.032789589 | 0.684925179 |
| c2.pcaac426                    | 0.024906823  | 0.061262788 | 0.684967693 |
| pcaac405.c101                  | 0.00289029   | 0.007109428 | 0.68497788  |
| pcaac385.threonine             | -0.013871048 | 0.034121088 | 0.684991835 |
| prolinr.pcaac240               | -0.006261966 | 0.015404853 | 0.685014625 |
| pcaec420.pcaac320              | 0.052015315  | 0.127964163 | 0.685021688 |
| pcaac421.c162                  | -0.025040093 | 0.061613029 | 0.685076214 |
| pcaac321.glycine               | -0.016188097 | 0.039832575 | 0.685080297 |
| pcaac381.putrescine            | -0.028120848 | 0.069196149 | 0.6850878   |
| c4.pcaec360                    | -0.001234743 | 0.003039851 | 0.685240209 |
| pcaec360.acetylorlithoine      | 0.006974302  | 0.017171148 | 0.685255819 |
| smc160.ornithine               | -0.010593247 | 0.026082445 | 0.685269955 |
| asymmetricdimethylarginine.pca | 0.001515397  | 0.003733378 | 0.685445698 |

|                                     |              |             |             |
|-------------------------------------|--------------|-------------|-------------|
| leucine.pcaec424                    | 0.012141068  | 0.029911816 | 0.685452727 |
| ornithine.pcaac420                  | 0.044320931  | 0.109199377 | 0.685470118 |
| pcaec446.pcaac424                   | 0.005143928  | 0.012675376 | 0.685507606 |
| pcaac281.pcaec403                   | -0.012337288 | 0.030404296 | 0.685541328 |
| pcaec380.asparagine                 | -0.006947758 | 0.017129027 | 0.685659636 |
| pcaac383.c102                       | 0.011976607  | 0.029534303 | 0.685731482 |
| pcaac322.smc261                     | -0.022117128 | 0.05454258  | 0.685741077 |
| c102.pcaac421                       | 0.004377829  | 0.010797481 | 0.685779895 |
| lysopcac161.pcaec342                | 0.046212145  | 0.113996858 | 0.685829923 |
| pcaec300.c3                         | -0.010801449 | 0.026650933 | 0.685894003 |
| pcaac366.pcaec446                   | -0.03194069  | 0.078829196 | 0.685970913 |
| putrescine.pcaac403                 | -0.002388579 | 0.005895546 | 0.685999354 |
| pcaec301.acetylornithoine           | 0.005181911  | 0.012790625 | 0.686011296 |
| lysopcac204.pcaec322                | 0.028140035  | 0.069474902 | 0.686080707 |
| pcaac401.valine                     | -0.012833418 | 0.031685849 | 0.686094184 |
| smc180.c5                           | -0.002413157 | 0.005958119 | 0.686094547 |
| pcaec321.pcaac343                   | -0.019678975 | 0.048590341 | 0.686110901 |
| putrescine.lysopcac180              | 0.031766709  | 0.078438363 | 0.686116938 |
| pcaec300.methionine                 | -0.014883312 | 0.036766771 | 0.686253425 |
| smc161.lysopcac204                  | 0.018298736  | 0.045216372 | 0.686334548 |
| creatinine.pcaac401                 | 0.000242031  | 0.000598208 | 0.68640741  |
| c18.tyrosine                        | -0.02372238  | 0.058645546 | 0.686472682 |
| lysopcac182.pcaec365                | 0.009371163  | 0.023167451 | 0.686478121 |
| methioninesulfoxide.serine          | 0.084591148  | 0.209168074 | 0.686536691 |
| pcaac323.pcaac421                   | 0.01342614   | 0.033201381 | 0.686560257 |
| alphaaminoadipicacid.lysopcac181    | 0.027382887  | 0.067717856 | 0.686573228 |
| lysopcac181.c0                      | 0.000281218  | 0.000695496 | 0.686591836 |
| pcaec425.smc160                     | -0.015048816 | 0.037218244 | 0.686593434 |
| pcaac420.pcaec401                   | 0.014934557  | 0.036937223 | 0.686605955 |
| pcaac240.c4                         | -0.006562036 | 0.016237445 | 0.686747405 |
| pcaec362.pcaec383                   | -0.031514363 | 0.078004115 | 0.686836072 |
| c10.smohc161                        | 0.004928476  | 0.012199527 | 0.686850655 |
| pcaec342.pcaac401                   | -0.001047911 | 0.002594087 | 0.686870896 |
| putrescine.c51dc                    | -0.048746973 | 0.120674702 | 0.686876751 |
| pcaac281.c5                         | 0.003831735  | 0.009485705 | 0.686880595 |
| pcaec381.asymmetricdimethylarginine | -0.010158033 | 0.025150299 | 0.686921074 |
| pcaec406.serine                     | -0.041321927 | 0.1023214   | 0.686956803 |
| c10.c8                              | 0.086368124  | 0.2138682   | 0.686961455 |
| pcaec341.c162                       | -0.030312933 | 0.075072595 | 0.687002885 |
| pcaac366.pcaac363                   | 0.008983584  | 0.022256468 | 0.687107326 |
| pcaec425.c181                       | -0.007071893 | 0.017521946 | 0.687134646 |
| pcaec422.pcaac401                   | -0.001051279 | 0.002605433 | 0.687213099 |
| pcaec385.smc160                     | -0.064121987 | 0.158978477 | 0.687328725 |

|                                |              |             |             |
|--------------------------------|--------------|-------------|-------------|
| pcaac366.pcaac424              | -0.00956658  | 0.023722843 | 0.687382351 |
| c182.pcaac341                  | 0.001751035  | 0.004342628 | 0.687414863 |
| smohc221.pcaac386              | 0.006530688  | 0.016197231 | 0.687431266 |
| lysopcac280.methioninesulfoxid | 0.008848692  | 0.021949723 | 0.687477657 |
| smc261.pcaac240                | -0.004578979 | 0.011361353 | 0.687553563 |
| lysopcac204.prolinr            | -0.012960551 | 0.032158068 | 0.687557049 |
| pcaac403.pcaec385              | 0.03680439   | 0.091344215 | 0.687635309 |
| pcaac406.pcaac360              | 0.016596286  | 0.041193387 | 0.687659258 |
| pcaec363.asparagine            | 0.007093476  | 0.017608302 | 0.687687731 |
| smc240.h1                      | 0.00280725   | 0.006970344 | 0.687765786 |
| smc240.spermidine              | 0.028285724  | 0.070233908 | 0.687770184 |
| pcaec403.c8                    | 0.018458302  | 0.045837999 | 0.687807188 |
| glutamine.c141oh               | -0.038068933 | 0.094569576 | 0.687907102 |
| lysopcac204.pcaac385           | -0.013516806 | 0.033581734 | 0.687939973 |
| asparticacid.c141oh            | -0.043165327 | 0.107247176 | 0.687954796 |
| glycine.histidine              | 0.01597036   | 0.039679632 | 0.687956222 |
| pcaac321.c51dc                 | -0.046538682 | 0.115657475 | 0.688028799 |
| pcaec340.lysopcac280           | 0.004205494  | 0.010452603 | 0.688061324 |
| pcaac342.pcaec364              | -0.00653036  | 0.016233681 | 0.688110577 |
| pcaac362.methioninesulfoxide   | 0.005685556  | 0.014138018 | 0.688202867 |
| pcaac362.c8                    | 0.016045765  | 0.039903116 | 0.688223781 |
| lysopcac180.prolinr            | -0.017890531 | 0.044493061 | 0.688239191 |
| pcaec423.pcaec363              | 0.012105029  | 0.030106612 | 0.688257544 |
| pcaac381.pcaac343              | 0.005280172  | 0.013135155 | 0.688319472 |
| pcaac300.pcaac321              | -0.014762734 | 0.036730497 | 0.68836898  |
| pcaac323.pcaec422              | -0.011963203 | 0.029773063 | 0.688447824 |
| pcaac344.pcaec321              | -0.003583646 | 0.008918955 | 0.68845651  |
| smc180.pcaac386                | 0.005000096  | 0.012446029 | 0.688499698 |
| pcaec381.pcaec386              | 0.004735955  | 0.011790507 | 0.68854891  |
| pcaac342.pcaec384              | 0.007639637  | 0.019022784 | 0.688600867 |
| lysopcac160.pcaac240           | -0.008740401 | 0.021764277 | 0.688608681 |
| smc260.phenylalanine           | -0.02199027  | 0.054761138 | 0.688628373 |
| pcaec403.pcaac426              | 0.036703772  | 0.091405815 | 0.688642785 |
| c2.pcaec362                    | -0.010372655 | 0.025842717 | 0.688768456 |
| pcaac342.pcaac341              | 0.007276204  | 0.01812919  | 0.688785607 |
| pcaac405.lysopcac204           | -0.006332452 | 0.015797154 | 0.689147454 |
| pcaac406.pcaec404              | -0.004125215 | 0.010291517 | 0.689165012 |
| pcaac404.pcaac343              | -0.015252623 | 0.038058868 | 0.68921822  |
| methionine.pcaec321            | -0.002739454 | 0.006835955 | 0.689234352 |
| pcaec384.lysine                | 0.025959255  | 0.064778956 | 0.689238822 |
| pcaec401.pcaac321              | 0.011617301  | 0.028990769 | 0.689247472 |
| pcaac420.pcaac424              | 0.005142507  | 0.012833164 | 0.689250416 |
| alphaaminoadipicacid.pcaec401  | 0.033978811  | 0.084819719 | 0.689338397 |

|                                |              |             |             |
|--------------------------------|--------------|-------------|-------------|
| asparagine.pcaac380            | 0.031598995  | 0.07894386  | 0.689579853 |
| pcaec365.smc180                | 0.015056558  | 0.037621306 | 0.689622556 |
| pcaec402.pcaac420              | -0.071890588 | 0.179638955 | 0.689636319 |
| asparagine.pcaec321            | -0.003170254 | 0.007921823 | 0.689638108 |
| pcaac341.arginine              | 0.020908093  | 0.052258673 | 0.689714493 |
| pcaac402.pcaec383              | 0.101077735  | 0.252668028 | 0.689748898 |
| histidine.pcaec386             | 0.003495515  | 0.008738475 | 0.68976904  |
| prolinr.pcaac322               | 0.022494213  | 0.056236719 | 0.689785706 |
| pcaec382.methioninesulfoxide   | 0.009027835  | 0.022572084 | 0.689812008 |
| pcaac403.c141                  | -0.028759987 | 0.071912405 | 0.689830336 |
| pcaac426.asparagine            | -0.016944398 | 0.042370248 | 0.689843702 |
| putrescine.pcaac381            | -0.017412464 | 0.043548681 | 0.68989776  |
| pcaec360.pcaec446              | -0.027072254 | 0.067714097 | 0.689924755 |
| c3.pcaec422                    | 0.013240054  | 0.033117445 | 0.689933135 |
| pcaec360.pcaac343              | 0.018256183  | 0.045666652 | 0.68994811  |
| serotonin.c18                  | 0.028842188  | 0.072147707 | 0.68995158  |
| lysopcac281.smohc221           | -0.026049347 | 0.065171043 | 0.689994533 |
| putrescine.pcaec401            | -0.007608686 | 0.019038409 | 0.690037258 |
| pcaac402.c141                  | 0.027378565  | 0.068509139 | 0.69004863  |
| smohc141.pcaac385              | -0.010865737 | 0.027190838 | 0.690065933 |
| pcaac386.pcaac360              | 0.013679787  | 0.034247456 | 0.690191393 |
| pcaac362.pcaac401              | -0.001508821 | 0.003777546 | 0.690207071 |
| pcaac402.smc160                | -0.027654233 | 0.069241366 | 0.690228596 |
| glycine.pcaac420               | -0.03990249  | 0.099918232 | 0.690256126 |
| c18.lysopcac181                | 0.016421224  | 0.041120812 | 0.690263831 |
| pcaec406.pcaec343              | 0.041818988  | 0.104742934 | 0.690328081 |
| smc181.pcaec382                | 0.00611449   | 0.01531586  | 0.690348312 |
| pcaec401.lysopcac140           | -0.000555152 | 0.001391175 | 0.690475662 |
| pcaac361.leucine               | -0.013312204 | 0.033365991 | 0.690532664 |
| c142.pcaac322                  | -0.02676119  | 0.067082684 | 0.690567061 |
| histidine.c51                  | 0.022196934  | 0.055644032 | 0.69058097  |
| pcaac421.smc161                | 0.044868117  | 0.112482247 | 0.690594839 |
| pcaec423.pcaec365              | 0.010349132  | 0.025947036 | 0.690620274 |
| lysopcac204.c162               | 0.033369153  | 0.083669678 | 0.690646669 |
| pcaec342.smc161                | -0.031712676 | 0.079517579 | 0.690651631 |
| c142.pcaac406                  | 0.016521016  | 0.041427244 | 0.690664473 |
| smc161.pcaec420                | -0.006053716 | 0.015180902 | 0.690682208 |
| c0.smc181                      | 0.010390136  | 0.026055697 | 0.690686202 |
| smc160.pcaec386                | 0.013230109  | 0.033178223 | 0.690691765 |
| methioninesulfoxide.lysopcac18 | 0.02245099   | 0.056314713 | 0.690757005 |
| pcaec342.c51dc                 | -0.05109331  | 0.128174306 | 0.690791125 |
| pcaac424.smc241                | -0.010623003 | 0.026651433 | 0.690815648 |
| smc261.pcaac421                | -0.005851535 | 0.014682162 | 0.690847314 |



|                                |              |             |             |
|--------------------------------|--------------|-------------|-------------|
| c5.acetylmethionine            | 0.048086544  | 0.120689714 | 0.690932645 |
| asparticacid.methionine        | -0.008275414 | 0.020774769 | 0.690999927 |
| pcaec382.prolinr               | -0.012001083 | 0.030127933 | 0.691001588 |
| pcaac342.pcaac401              | -0.001278627 | 0.003210014 | 0.691011238 |
| pcaec444.pcaac322              | -0.022956497 | 0.057633399 | 0.691014878 |
| pcaec422.pcaac363              | -0.014805883 | 0.037183328 | 0.691112867 |
| pcaec301.lysopcac140           | -0.000682399 | 0.001714019 | 0.69115566  |
| pcaec403.h1                    | 0.001144298  | 0.002874228 | 0.691158745 |
| pcaac406.valine                | -0.022507386 | 0.056548644 | 0.691236355 |
| c0.c182                        | 0.037121195  | 0.093282908 | 0.691292291 |
| c141.pcaac420                  | -0.030157828 | 0.075786361 | 0.691299607 |
| prolinr.pcaec403               | 0.021831097  | 0.054887447 | 0.69143872  |
| pcaec422.pcaec402              | 0.015953788  | 0.040123932 | 0.691534476 |
| pcaec322.arginine              | -0.022479935 | 0.056543906 | 0.691568888 |
| ornithine.pcaac401             | 0.000628296  | 0.001580421 | 0.691580976 |
| lysopcac280.leucine            | 0.010480998  | 0.02638005  | 0.69175884  |
| pcaac381.pcaac404              | -0.004517482 | 0.01137201  | 0.691804456 |
| smohc241.arginine              | -0.011081202 | 0.027896851 | 0.691823003 |
| pcaac420.c51dc                 | -0.057590349 | 0.144985022 | 0.691826446 |
| smohc141.pcaac401              | -0.001174213 | 0.002956943 | 0.691908949 |
| alphaaminoadipicacid.asymmetri | 0.031406393  | 0.079124212 | 0.692040279 |
| pcaec342.ornithine             | 0.01806456   | 0.045511503 | 0.692041929 |
| pcaac386.pcaac424              | -0.007185195 | 0.018102567 | 0.692047166 |
| smc202.pcaac401                | -0.000725651 | 0.001828399 | 0.692075205 |
| pcaec382.pcaac343              | 0.007850442  | 0.01978492  | 0.692140348 |
| c101.pcaec361                  | -0.003826641 | 0.009647272 | 0.692238928 |
| smc202.pcaac364                | -0.015545524 | 0.039195366 | 0.692267496 |
| pcaec381.smc261                | -0.029805521 | 0.075157638 | 0.692299104 |
| lysopcac204.pcaac364           | 0.019766244  | 0.049847527 | 0.692328031 |
| pcaec360.c4                    | -0.007657409 | 0.019315382 | 0.692396536 |
| kynurenine.c10                 | -0.014693669 | 0.037064341 | 0.69239961  |
| methionine.c141oh              | 0.045677703  | 0.115245449 | 0.692462415 |
| pcaac322.smc161                | -0.03130377  | 0.078985309 | 0.692482669 |
| c8.smohc161                    | 0.004635711  | 0.011697537 | 0.692501752 |
| pcaac360.acetylmethionine      | -0.024294808 | 0.061309522 | 0.692526165 |
| smohc241.pcaec446              | -0.013751989 | 0.034704417 | 0.692529364 |
| smc241.lysopcac204             | 0.013258984  | 0.03348397  | 0.692735763 |
| pcaec420.c0                    | 0.000299059  | 0.000755293 | 0.692757496 |
| lysopcac180.isoleucine         | 0.012902843  | 0.032601768 | 0.692889424 |
| glutamicacid.pcaec361          | 0.001452489  | 0.003670241 | 0.692906796 |
| leucine.c5                     | -0.008623153 | 0.021790044 | 0.692913753 |
| pcaec363.smc241                | -0.009764974 | 0.02467602  | 0.692921797 |
| pcaac406.c4                    | -0.012072346 | 0.030508494 | 0.692938621 |

|                              |              |             |             |
|------------------------------|--------------|-------------|-------------|
| lysopcac280.c51              | -0.054308979 | 0.137271592 | 0.692992231 |
| smohc141.pcaac381            | -0.012161624 | 0.03074061  | 0.693000187 |
| pcaec443.smc160              | -0.014162451 | 0.035798351 | 0.69300268  |
| pcaec403.lysopcac180         | -0.028212995 | 0.071314724 | 0.693006296 |
| pcaac406.pcaac321            | -0.00922339  | 0.023314742 | 0.693013029 |
| pcaac240.pcaec342            | 0.035139691  | 0.088839825 | 0.693059767 |
| pcaac320.taurine             | -0.010594745 | 0.026790898 | 0.693118088 |
| pcaec380.pcaac364            | -0.026523962 | 0.067081269 | 0.693162403 |
| smc202.pcaac365              | -0.020646414 | 0.052223884 | 0.693203727 |
| pcaec421.smc202              | 0.035880473  | 0.090813497 | 0.693383088 |
| glutamicacid.c3              | 0.024926209  | 0.063091501 | 0.693398077 |
| smc181.pcaac322              | -0.025986983 | 0.065785    | 0.693435843 |
| pcaac365.pcaac320            | 0.030048034  | 0.076077755 | 0.693483135 |
| lysopcac182.pcaac320         | -0.033274561 | 0.084258623 | 0.693523568 |
| pcaec340.c0                  | 0.000226807  | 0.000574332 | 0.693526699 |
| pcaec365.pcaac386            | 0.006609701  | 0.016740904 | 0.693587242 |
| pcaac240.smc160              | -0.033076596 | 0.083778659 | 0.693597592 |
| pcaec422.acetylnithoine      | 0.035825754  | 0.090744592 | 0.693606175 |
| smohc222.pcaec364            | -0.019913444 | 0.050439912 | 0.693607871 |
| pcaac406.lysopcac140         | -0.000689493 | 0.001746655 | 0.693641121 |
| pcaec385.threonine           | -0.013206999 | 0.033474945 | 0.693800443 |
| pcaec385.lysopcac140         | 0.001632447  | 0.004137828 | 0.693812194 |
| pcaac300.phenylalanine       | 0.017036613  | 0.043186351 | 0.693832232 |
| smohc161.c8                  | -0.017550943 | 0.044493761 | 0.69385593  |
| pcaec300.kynurenine          | -0.005614343 | 0.014233534 | 0.693866034 |
| c8.tyrosine                  | 0.038183667  | 0.096811924 | 0.693891074 |
| smc202.c141                  | -0.018556736 | 0.047051601 | 0.693905522 |
| pcaec386.serine              | 0.036661994  | 0.092962676 | 0.693918707 |
| alphaaminoadipicacid.smc160  | 0.018551453  | 0.047047375 | 0.693962124 |
| pcaec361.pcaec341            | -0.029465574 | 0.074730127 | 0.693977741 |
| citruline.pcaec386           | 0.005553618  | 0.014086014 | 0.693998673 |
| smc161.pcaec382              | -0.006510875 | 0.01651411  | 0.694001167 |
| pcaac360.smc260              | 0.016010344  | 0.040609753 | 0.694010419 |
| pcaac406.pcaac366            | -0.02671356  | 0.067764478 | 0.694037585 |
| smc260.c2                    | -0.027047464 | 0.068622151 | 0.694082675 |
| pcaac404.serotonin           | 0.036115759  | 0.091655853 | 0.694166674 |
| pcaac385.pcaec422            | -0.009307743 | 0.023622053 | 0.694173211 |
| lysopcac181.pcaec321         | -0.024157603 | 0.061317359 | 0.694210874 |
| smohc241.methioninesulfoxide | 0.004058645  | 0.010302444 | 0.694230652 |
| smc181.pcaec444              | 0.037359711  | 0.094840104 | 0.694250241 |
| pcaac363.taurine             | -0.012165119 | 0.030887455 | 0.694301842 |
| pcaec340.pcaac320            | 0.039377127  | 0.100008485 | 0.694386716 |
| c14.pcaec360                 | 0.00240533   | 0.006109678 | 0.694420595 |

|                             |              |             |             |
|-----------------------------|--------------|-------------|-------------|
| pcaec422.pcaac321           | 0.00677928   | 0.017221826 | 0.694455376 |
| pcaac364.c141oh             | -0.034958515 | 0.088820069 | 0.694497099 |
| pcaec403.smc241             | -0.009074543 | 0.023057029 | 0.694510736 |
| pcaec420.pcaac401           | 0.000623716  | 0.001584956 | 0.694545111 |
| smc160.pcaec401             | 0.016310018  | 0.041452222 | 0.694587388 |
| pcaac420.pcaac401           | -0.002795175 | 0.007106051 | 0.694671458 |
| pcaac405.smohc222           | -0.003177056 | 0.008080312 | 0.694794178 |
| pcaac425.pcaec401           | 0.014603311  | 0.037143959 | 0.694816557 |
| pcaec420.c51dc              | -0.055071805 | 0.140080116 | 0.694823452 |
| c16.lysopcac280             | 0.00936409   | 0.02381842  | 0.694823576 |
| pcaec321.lysopcac281        | 0.008700017  | 0.022131445 | 0.694851788 |
| pcaec385.pcaac421           | -0.026677394 | 0.067878854 | 0.694919437 |
| smc161.pcaac401             | -0.000898734 | 0.002286836 | 0.694928108 |
| citruline.pcaec401          | 0.012592156  | 0.032041794 | 0.694936523 |
| pcaec446.pcaac380           | -0.020470006 | 0.052097749 | 0.694992696 |
| smc240.pcaec401             | -0.013980244 | 0.035581184 | 0.694995802 |
| lysopcac170.pcaac361        | -0.016278928 | 0.041435272 | 0.695021623 |
| smc180.pcaec402             | -0.024195188 | 0.061591372 | 0.695052621 |
| pcaec301.c5                 | 0.004575487  | 0.011647587 | 0.695057793 |
| pcaac363.smohc161           | -0.019828711 | 0.05052582  | 0.695337796 |
| pcaec385.smc240             | -0.010893881 | 0.0277609   | 0.695359133 |
| pcaec362.pcaac380           | 0.026741655  | 0.068153469 | 0.695391595 |
| acetylmethionine.pcaac344   | -0.024095935 | 0.061412665 | 0.695401241 |
| c16.pcaec446                | 0.033754651  | 0.086042989 | 0.695446318 |
| pcaec382.pcaac344           | -0.043958894 | 0.112054564 | 0.695446938 |
| glutamine.pcaec401          | -0.011611563 | 0.029606516 | 0.695522718 |
| pcaac385.pcaac421           | -0.014660651 | 0.037383552 | 0.695543139 |
| smohc161.pcaec360           | 0.006793171  | 0.017322606 | 0.695552033 |
| smc160.c51dc                | -0.044951251 | 0.114643741 | 0.695597221 |
| smc161.alphaaminoadipicacid | 0.008949632  | 0.022829494 | 0.695652166 |
| smohc141.lysopcac280        | 0.003724965  | 0.009505324 | 0.695754384 |
| kynurenine.smc181           | -0.005424314 | 0.013847139 | 0.695867761 |
| pcaac424.smc161             | 0.043989395  | 0.112330885 | 0.695958151 |
| smohc222.lysopcac281        | -0.010769798 | 0.027504317 | 0.695986156 |
| acetylmethionine.c18        | -0.02334431  | 0.059634057 | 0.696065903 |
| pcaec425.c4                 | -0.005941199 | 0.01517759  | 0.696076149 |
| c101.pcaec402               | -0.01698688  | 0.043397365 | 0.696090115 |
| lysopcac280.c3              | -0.017710417 | 0.045259511 | 0.696177372 |
| pcaec444.pcaac380           | 0.025636883  | 0.065519997 | 0.6961957   |
| pcaec341.c142               | 0.017431803  | 0.044551715 | 0.696204644 |
| asparticacid.valine         | -0.016760078 | 0.042868096 | 0.696427819 |
| lysopcac170.c182            | -0.012518943 | 0.032022843 | 0.69645042  |
| pcaec403.leucine            | 0.002778903  | 0.007108561 | 0.696461102 |

|                            |              |             |             |
|----------------------------|--------------|-------------|-------------|
| serotonin.pcaac363         | 0.004262901  | 0.010906283 | 0.696503041 |
| pcaec300.putrescine        | -0.012358694 | 0.03162471  | 0.696557772 |
| methionine.pcaac401        | 0.000476947  | 0.001220509 | 0.69656894  |
| lysine.pcaac386            | 0.009126421  | 0.023366789 | 0.696720048 |
| pcaec321.smc161            | -0.02889988  | 0.07399501  | 0.696725256 |
| c5.c10                     | -0.018897604 | 0.048386039 | 0.696729848 |
| c0.pcaac385                | 0.011506915  | 0.029473202 | 0.696832708 |
| pcaec365.pcaac386          | -0.004016129 | 0.01028889  | 0.696894052 |
| serotonin.pcaec340         | -0.026799008 | 0.068668465 | 0.696945551 |
| methioninesulfoxide.lysine | -0.052776447 | 0.135237433 | 0.696957579 |
| pcaec383.serine            | 0.040478827  | 0.103736046 | 0.69698741  |
| c162.lysopcac161           | -0.038159842 | 0.097808161 | 0.697031648 |
| pcaec402.pcaec444          | -0.064342896 | 0.164920319 | 0.697034988 |
| pcaec425.threonine         | -0.009606162 | 0.02462366  | 0.697054296 |
| pcaac344.taurine           | -0.005299804 | 0.013587029 | 0.697095356 |
| pcaec381.c14               | 0.02548351   | 0.065338141 | 0.697123757 |
| c2.c141                    | -0.020962542 | 0.053752789 | 0.697156566 |
| pcaec360.pcaec382          | 0.003829487  | 0.009820556 | 0.697182033 |
| c141oh.pcaec384            | 0.011858613  | 0.030413748 | 0.69720889  |
| pcaac344.pcaac300          | -0.058404077 | 0.149793646 | 0.697218281 |
| c181.pcaac341              | 0.002371606  | 0.006084286 | 0.697295607 |
| pcaac405.ornithine         | 0.00634191   | 0.016270353 | 0.69730219  |
| pcaac386.c18               | -0.017436171 | 0.044745488 | 0.697382439 |
| pcaac426.pcaac386          | 0.011966884  | 0.030712816 | 0.697409206 |
| h1.pcaac386                | -0.00864437  | 0.022187456 | 0.697432778 |
| kynurenine.pcaac421        | -0.014132683 | 0.036292931 | 0.697580525 |
| pcaec422.pcaac385          | 0.025561146  | 0.065645909 | 0.697600314 |
| pcaac406.pcaac421          | -0.004493056 | 0.011539806 | 0.697619753 |
| c14.pcaec343               | -0.023202652 | 0.059594465 | 0.697627404 |
| pcaec362.histidine         | -0.025393773 | 0.065225253 | 0.697640798 |
| pcaac344.pcaec322          | 0.030344544  | 0.077942297 | 0.697643471 |
| pcaec341.lysopcac281       | 0.013646692  | 0.035064731 | 0.697743041 |
| prolinr.smohc161           | -0.005802082 | 0.014908469 | 0.697747047 |
| smc260.c141                | 0.007861277  | 0.020201643 | 0.697776426 |
| pcaac403.pcaec383          | -0.081721441 | 0.210011955 | 0.697785943 |
| pcaac362.smc161            | -0.04420415  | 0.113600233 | 0.69779135  |
| creatinine.pcaac422        | -0.010355333 | 0.026616649 | 0.697839719 |
| pcaac380.pcaec384          | -0.014835747 | 0.038136955 | 0.697870965 |
| pcaac321.pcaac384          | -0.025754894 | 0.066205879 | 0.697871098 |
| pcaec425.pcaec343          | 0.036127122  | 0.092879018 | 0.697902468 |
| pcaec402.pcaec343          | 0.02269634   | 0.058356357 | 0.697934257 |
| lysopcac161.pcaac401       | -0.000691609 | 0.001778361 | 0.697951945 |
| histidine.pcaac401         | 0.000314296  | 0.000808173 | 0.697956338 |

|                                 |              |             |             |
|---------------------------------|--------------|-------------|-------------|
| pcaec342.pcaac321               | -0.01135481  | 0.029201813 | 0.697998753 |
| pcaec445.pcaac384               | 0.034873041  | 0.089696567 | 0.698035792 |
| pcaac383.pcaec425               | -0.009484941 | 0.024397787 | 0.698055501 |
| pcaec340.pcaac323               | 0.035450262  | 0.091189364 | 0.698061388 |
| acetylmethionine.lysopcac140    | 0.000176303  | 0.000453569 | 0.69809962  |
| arginine.pcaac344               | 0.033381633  | 0.085885744 | 0.69812003  |
| pcaac424.methioninesulfoxide    | 0.009586982  | 0.02466746  | 0.698139198 |
| pcaac406.pcaac364               | 0.010148672  | 0.026134934 | 0.698383296 |
| creatinine.pcaac360             | 0.009828404  | 0.025315463 | 0.698443155 |
| smohc161.pcaec343               | -0.02095693  | 0.053982238 | 0.698456568 |
| smc181.arginine                 | 0.010676117  | 0.027522172 | 0.698684939 |
| methioninesulfoxide.pcaec341    | -0.010455676 | 0.026955142 | 0.698698205 |
| pcaec425.smc161                 | 0.025934016  | 0.066866666 | 0.698731431 |
| pcaec321.pcaac363               | -0.003321631 | 0.008564611 | 0.698742253 |
| smohc161.creatinine             | -0.002972176 | 0.007665267 | 0.69880581  |
| pcaec322.pcaac402               | -0.030255814 | 0.078042051 | 0.698850059 |
| methioninesulfoxide.lysopcac141 | -0.001373627 | 0.003544235 | 0.698938313 |
| putrescine.lysopcac161          | -0.016663594 | 0.042996451 | 0.698945035 |
| isoleucine.h1                   | -0.000669207 | 0.001727014 | 0.698991884 |
| glutamine.lysopcac160           | -0.01150474  | 0.029693222 | 0.699021852 |
| pcaac424.pcaac421               | -0.014188321 | 0.036626414 | 0.699076443 |
| smohc222.pcaec446               | -0.00984164  | 0.025406174 | 0.69908197  |
| smc181.pcaec401                 | 0.009968233  | 0.025741112 | 0.699172423 |
| lysine.pcaec382                 | -0.007107992 | 0.01836165  | 0.699274898 |
| lysopcac182.pcaec386            | -0.003685995 | 0.009522385 | 0.69929214  |
| pcaac320.c102                   | 0.016142175  | 0.041705643 | 0.699319675 |
| smc260.c142                     | -0.021063547 | 0.054423266 | 0.699333048 |
| lysine.pcaac422                 | 0.011918771  | 0.030799284 | 0.699369945 |
| c3.asparticacid                 | 0.012823014  | 0.033137193 | 0.699380762 |
| pcaac381.pcaec386               | -0.02550598  | 0.065914187 | 0.699388193 |
| h1.pcaec383                     | -0.042591994 | 0.110098148 | 0.699463972 |
| pcaec383.taurine                | 0.034056971  | 0.088038046 | 0.699472087 |
| pcaec321.c5                     | 0.002657959  | 0.006871516 | 0.69949836  |
| smc181.pcaac401                 | -0.000741099 | 0.001916123 | 0.699526545 |
| smohc241.pcaac300               | -0.026818203 | 0.069387069 | 0.699724963 |
| pcaac381.lysopcac281            | 0.015341068  | 0.039699575 | 0.699778474 |
| pcaac323.acetylmethionine       | 0.009152281  | 0.023685531 | 0.699793915 |
| pcaec444.pcaac401               | -0.001254767 | 0.003247303 | 0.699797774 |
| pcaec381.pcaac401               | -0.001628208 | 0.004213792 | 0.699800098 |
| c4.pcaec444                     | -0.024154307 | 0.062519133 | 0.699836374 |
| pcaac422.glycine                | -0.008585649 | 0.022222586 | 0.69983841  |
| pcaec342.pcaac281               | 0.000674599  | 0.001746257 | 0.699865393 |
| alphaaminoadipicacid.smc240     | 0.007315557  | 0.018937614 | 0.699875481 |

|                                |              |             |             |
|--------------------------------|--------------|-------------|-------------|
| lysopcac280.pcaac385           | -0.014276655 | 0.036960889 | 0.699900503 |
| pcaac364.pcaec383              | 0.028397008  | 0.073524246 | 0.699928132 |
| pcaac361.lysopcac160           | -0.014516186 | 0.037590825 | 0.699975009 |
| pcaec405.c102                  | -0.012753526 | 0.033026477 | 0.699976724 |
| pcaec424.pcaec422              | -0.023666905 | 0.061302668 | 0.700046322 |
| c2.spermidine                  | -0.02738809  | 0.070943377 | 0.700054337 |
| pcaec365.pcaac240              | -0.008293381 | 0.021488879 | 0.700141054 |
| smc180.smc261                  | -0.029196564 | 0.075660785 | 0.700178438 |
| smohc161.arginine              | -0.009892155 | 0.025645098 | 0.700292889 |
| spermidine.acetylnithoine      | -0.053973961 | 0.140076387 | 0.700599385 |
| pcaec362.smc241                | -0.027161714 | 0.070492263 | 0.700601766 |
| pcaec301.lysopcac281           | 0.004198681  | 0.010897262 | 0.70061502  |
| c142.transhydroxyproline       | 0.008979536  | 0.023308445 | 0.700651014 |
| pcaec444.pcaac323              | -0.034765131 | 0.090288071 | 0.700799888 |
| histidine.pcaec380             | 0.020595553  | 0.05350233  | 0.700873758 |
| pcaac364.c51dc                 | -0.043863423 | 0.113953713 | 0.700891266 |
| pcaec445.putrescine            | -0.032554473 | 0.084575806 | 0.700897496 |
| pcaac240.asymmetricdimethylar; | -0.015437673 | 0.040110888 | 0.700926949 |
| pcaec386.c2                    | -0.018282099 | 0.047502348 | 0.700932571 |
| pcaec363.c102                  | 0.009891439  | 0.025706267 | 0.70099185  |
| serotonin.pcaec321             | 0.003620816  | 0.009412003 | 0.701054764 |
| glycine.pcaac424               | -0.003126247 | 0.008134434 | 0.701335173 |
| pcaec445.pcaac363              | -0.00427399  | 0.011121565 | 0.701353755 |
| phenylalanine.ornithine        | 0.025765115  | 0.067056883 | 0.701405376 |
| c18.pcaac425                   | -0.025337246 | 0.065946915 | 0.701420949 |
| serine.pcaac426                | -0.01451419  | 0.037781446 | 0.701454106 |
| putrescine.smc260              | -0.008246904 | 0.021469629 | 0.701485388 |
| histidine.lysopcac182          | 0.009182878  | 0.023911846 | 0.701551212 |
| pcaec405.spermidine            | -0.026077712 | 0.067910854 | 0.701574385 |
| pcaec381.pcaec360              | -0.002515546 | 0.006551143 | 0.701584294 |
| pcaec342.c182                  | -0.018044909 | 0.046995956 | 0.701597985 |
| pcaec384.pcaec361              | -0.005999842 | 0.015626686 | 0.701611888 |
| pcaac385.smc180                | 0.018623001  | 0.048506464 | 0.701626847 |
| smohc161.lysopcac281           | -0.007283075 | 0.018970023 | 0.701628878 |
| c142.pcaac401                  | -0.00103583  | 0.002698232 | 0.701653539 |
| ornithine.pcaec364             | 0.007916099  | 0.020626946 | 0.701740417 |
| pcaac425.asparticacid          | -0.024716779 | 0.064427476 | 0.701842042 |
| phenylalanine.pcaac404         | 0.002804974  | 0.007312144 | 0.701866031 |
| pcaec423.pcaac300              | -0.02238823  | 0.05836839  | 0.701893466 |
| c14.pcaec340                   | 0.020612445  | 0.053754806 | 0.701978258 |
| lysine.pcaec445                | -0.019241842 | 0.050183664 | 0.701996496 |
| pcaec445.pcaac320              | -0.025911844 | 0.067588738 | 0.702035862 |
| pcaec340.pcaac363              | -0.004292979 | 0.011198169 | 0.702043836 |

|                              |              |             |             |
|------------------------------|--------------|-------------|-------------|
| pcaec444.pcaac405            | -0.027206156 | 0.070977841 | 0.702087826 |
| pcaec405.pcaac404            | -0.003907934 | 0.010195791 | 0.702099667 |
| pcaac322.isoleucine          | -0.00894378  | 0.023340026 | 0.702169157 |
| histidine.smc160             | 0.030463261  | 0.079502069 | 0.70218341  |
| pcaec385.pcaac361            | 0.032207374  | 0.084061747 | 0.702210201 |
| smc240.smc260                | 0.019458025  | 0.050792491 | 0.702247827 |
| c12.serotonin                | 0.012425713  | 0.032441225 | 0.702296874 |
| leucine.c8                   | -0.011948474 | 0.031198669 | 0.702327971 |
| c10.tryptophan               | 0.00161386   | 0.004214657 | 0.702375467 |
| pcaac240.pcaac343            | 0.038087972  | 0.099485245 | 0.702423997 |
| pcaac361.spermidine          | -0.02863399  | 0.074799796 | 0.702455115 |
| lysopcac140.valine           | -0.026252445 | 0.068579281 | 0.702458132 |
| pcaac321.methioninesulfoxide | 0.02356339   | 0.061554882 | 0.702459148 |
| lysopcac161.pcaac421         | 0.019723926  | 0.051530925 | 0.702491648 |
| citruline.pcaac363           | -0.011374687 | 0.029721799 | 0.702531451 |
| serine.pcaac320              | -0.0110074   | 0.028763341 | 0.702543798 |
| pcaec361.lysopcac281         | -0.0144386   | 0.037737864 | 0.70260746  |
| pcaec342.pcaac384            | 0.033880305  | 0.088572209 | 0.702671292 |
| pcaac384.pcaac300            | 0.028182963  | 0.073680707 | 0.702682344 |
| lysopcac203.lysopcac161      | -0.042639007 | 0.111492878 | 0.702729859 |
| pcaec423.c162                | -0.029770179 | 0.077848846 | 0.702749859 |
| pcaac342.c4                  | -0.005406401 | 0.014138205 | 0.702759838 |
| arginine.threonine           | 0.009193746  | 0.024046852 | 0.702811728 |
| pcaac322.pcaac342            | -0.039317331 | 0.102861572 | 0.702879084 |
| lysopcac203.smc241           | -0.007056262 | 0.018464842 | 0.702945351 |
| pcaac425.pcaac404            | 0.004537273  | 0.011875119 | 0.702992333 |
| pcaec425.c102                | -0.010605748 | 0.027759745 | 0.703012599 |
| lysopcac182.pcaac321         | -0.009912643 | 0.025947028 | 0.703028211 |
| pcaec380.pcaac384            | -0.010987086 | 0.028762233 | 0.7030555   |
| pcaec300.pcaac386            | 0.003359585  | 0.008797505 | 0.703142536 |
| arginine.c4                  | 0.020362296  | 0.053324805 | 0.703161219 |
| pcaac383.lysopcac180         | 0.025214234  | 0.066056163 | 0.703268589 |
| pcaec446.smc241              | -0.007407863 | 0.019408925 | 0.70329523  |
| pcaec300.tyrosine            | 0.017965868  | 0.047079283 | 0.703342784 |
| histidine.c162               | 0.042668997  | 0.111828926 | 0.703381858 |
| pcaac344.pcaac320            | -0.046444219 | 0.121727385 | 0.703391556 |
| pcaac386.smc160              | -0.030007978 | 0.078672058 | 0.703474224 |
| pcaac421.pcaac322            | -0.029519244 | 0.077391727 | 0.703477818 |
| c8.c14                       | -0.021080726 | 0.055277232 | 0.703524247 |
| glutamicacid.pcaac344        | -0.035396051 | 0.092850759 | 0.703634666 |
| pcaec342.pcaac402            | -0.022145337 | 0.05809733  | 0.703662763 |
| pcaec361.pcaac300            | -0.024110588 | 0.06325368  | 0.703665435 |
| pcaec425.prolinr             | 0.00772745   | 0.020272865 | 0.703666033 |

|                                 |              |             |             |
|---------------------------------|--------------|-------------|-------------|
| serine.pcaac381                 | 0.013368516  | 0.035073045 | 0.703673418 |
| lysopcac160.smc241              | -0.020717164 | 0.054355643 | 0.70368905  |
| c102.prolinr                    | 0.013688929  | 0.035924725 | 0.703760276 |
| pcaec446.lysopcac181            | -0.037374309 | 0.098084623 | 0.703762719 |
| smc240.smc261                   | 0.015814909  | 0.041505213 | 0.703768053 |
| c182.pcaac240                   | -0.006055855 | 0.015895551 | 0.703809713 |
| c182.tryptophan                 | 0.003892251  | 0.010216598 | 0.703813161 |
| pcaec382.smc160                 | -0.042955834 | 0.112762196 | 0.70383651  |
| serotonin.c16                   | 0.01676499   | 0.04401336  | 0.703862391 |
| pcaac385.tryptophan             | -0.003254158 | 0.00854465  | 0.703910656 |
| pcaec446.c8                     | -0.01555841  | 0.040857216 | 0.703941805 |
| c141oh.asymmetricdimethylargini | -0.005781532 | 0.015183562 | 0.703959459 |
| pcaec404.putrescine             | 0.0293314    | 0.077054435 | 0.704046496 |
| pcaec443.transhydroxyproline    | -0.019211181 | 0.05049087  | 0.704172345 |
| phenylalanine.histidine         | 0.036215587  | 0.095193806 | 0.704207608 |
| pcaec443.pcaac386               | 0.004720685  | 0.012408669 | 0.704212153 |
| pcaec386.smohc141               | -0.051413602 | 0.135152779 | 0.704229523 |
| c14.smc260                      | 0.016314942  | 0.04289257  | 0.704261686 |
| pcaac341.acetylmethionine       | 0.005589522  | 0.01469647  | 0.704288825 |
| arginine.pcaac343               | -0.011002876 | 0.028948135 | 0.704467734 |
| c4.smc202                       | 0.028898573  | 0.076037892 | 0.704493223 |
| pcaac401.lysopcac160            | -0.022790076 | 0.059971823 | 0.704524204 |
| pcaec403.pcaec446               | 0.021922954  | 0.057691965 | 0.70453378  |
| pcaec446.pcaac421               | -0.032955618 | 0.086726418 | 0.704537464 |
| pcaec402.pcaac343               | 0.007033204  | 0.018516467 | 0.704655992 |
| pcaac300.pcaec363               | -0.01288242  | 0.033916293 | 0.7046599   |
| pcaec425.methioninesulfoxide    | 0.008039372  | 0.021166431 | 0.704669359 |
| pcaac364.pcaac424               | -0.004184862 | 0.011023917 | 0.704817795 |
| lysopcac182.pcaec364            | 0.014321606  | 0.037733105 | 0.704867056 |
| pcaec343.c4                     | -0.006847018 | 0.018040137 | 0.704871915 |
| c141oh.pcaac404                 | 0.001272857  | 0.003354141 | 0.704912891 |
| putrescine.prolinr              | -0.00832162  | 0.021930087 | 0.704932855 |
| c8.c102                         | -0.013957672 | 0.036793196 | 0.705011839 |
| pcaac323.tyrosine               | 0.019403213  | 0.051149021 | 0.705017754 |
| pcaec360.pcaec386               | 0.001927466  | 0.005081092 | 0.705022019 |
| h1.smc181                       | -0.002566102 | 0.006766603 | 0.705103844 |
| putrescine.pcaac401             | 0.000635979  | 0.001677759 | 0.705226532 |
| pcaec362.c162                   | 0.037483534  | 0.098935524 | 0.705372182 |
| pcaec421.pcaac320               | -0.022792388 | 0.060185592 | 0.705495596 |
| pcaac240.pcaac401               | -0.001794291 | 0.004738192 | 0.705506685 |
| lysopcac170.pcaac384            | 0.017275559  | 0.045628721 | 0.705562449 |
| pcaec365.smc261                 | -0.012528087 | 0.033089868 | 0.705565086 |
| c0.smc261                       | 0.016920736  | 0.04470226  | 0.705629659 |



|                          |              |             |             |
|--------------------------|--------------|-------------|-------------|
| c8.c51dc                 | -0.045792164 | 0.120986775 | 0.705653231 |
| smc180.pcaac401          | -0.000777246 | 0.002053962 | 0.705709324 |
| pcaac383.pcaec321        | -0.003020933 | 0.00798553  | 0.705792629 |
| isoleucine.pcaac240      | -0.006614067 | 0.017491708 | 0.705922328 |
| pcaac426.pcaec403        | -0.010798724 | 0.028565663 | 0.705992185 |
| pcaac425.c142            | 0.016257362  | 0.043006638 | 0.706000927 |
| pcaac381.pcaac360        | 0.023981174  | 0.063440234 | 0.706006679 |
| asparticacid.lysopcac281 | 0.00630073   | 0.016671231 | 0.70605988  |
| pcaec444.pcaec386        | 0.003106221  | 0.008219572 | 0.706085703 |
| pcaec404.c4              | -0.010848725 | 0.028710484 | 0.706114702 |
| pcaac364.glutamicacid    | 0.018982959  | 0.050238415 | 0.706121288 |
| pcaac360.pcaac386        | 0.004561205  | 0.012071318 | 0.706123252 |
| pcaac380.arginine        | 0.016130914  | 0.042699128 | 0.706178031 |
| pcaec365.smc241          | 0.00780703   | 0.020666039 | 0.706185357 |
| lysopcac181.pcaec383     | -0.046035439 | 0.121895595 | 0.706265515 |
| c181.pcaec445            | -0.034456609 | 0.091255726 | 0.706324723 |
| smohc141.glycine         | -0.02043587  | 0.054144293 | 0.70643553  |
| pcaec383.pcaac343        | 0.012529992  | 0.033203179 | 0.706480185 |
| alanine.phenylalanine    | -0.021599312 | 0.05724226  | 0.706511093 |
| pcaec401.pcaec301        | 0.030820924  | 0.081681293 | 0.706511161 |
| kynurenine.lysopcac170   | -0.008129355 | 0.021547907 | 0.706557564 |
| pcaac422.kynurenine      | 0.005024917  | 0.013320696 | 0.706589134 |
| acetylmithoine.c4        | -0.007672007 | 0.020345833 | 0.7066976   |
| pcaec301.pcaac404        | -0.008892459 | 0.023584373 | 0.70672076  |
| pcaac322.smc180          | -0.003415142 | 0.009058479 | 0.706749129 |
| pcaec382.leucine         | 0.004080908  | 0.010825935 | 0.706789057 |
| lysopcac170.smc261       | 0.014903884  | 0.039538732 | 0.706798525 |
| pcaec360.pcaac321        | 0.01654756   | 0.043905429 | 0.706837761 |
| c51.pcaec364             | 0.008519714  | 0.022606288 | 0.706850604 |
| lysopcac203.pcaac384     | 0.018112459  | 0.048061143 | 0.706858614 |
| pcaec425.lysopcac204     | -0.014790137 | 0.039253731 | 0.706917854 |
| c16.pcaac321             | -0.007596861 | 0.020165125 | 0.706955157 |
| leucine.pcaec342         | -0.037522786 | 0.099618655 | 0.707005876 |
| lysopcac203.pcaac383     | -0.002737815 | 0.007269899 | 0.707056497 |
| kynurenine.threonine     | 0.007235127  | 0.019213746 | 0.707083232 |
| lysopcac280.pcaec420     | 0.012179412  | 0.032345976 | 0.707101271 |
| pcaec446.pcaec363        | -0.01705331  | 0.045290413 | 0.707103615 |
| pcaec365.c18             | -0.016562811 | 0.044004146 | 0.707207722 |
| smohc161.c181            | 0.006357445  | 0.016890789 | 0.70721272  |
| lysopcac281.pcaac360     | -0.019741441 | 0.052451463 | 0.707220072 |
| pcaec421.pcaac360        | 0.015140447  | 0.040228281 | 0.707229083 |
| serotonin.smc260         | 0.010940071  | 0.029070389 | 0.70725346  |
| pcaac322.glycine         | 0.013394157  | 0.035596159 | 0.707290126 |

|                         |              |             |             |
|-------------------------|--------------|-------------|-------------|
| lysopcac170.lysopcac140 | 0.000761636  | 0.002024507 | 0.707344256 |
| pcaac322.pcaec383       | -0.0316606   | 0.084164891 | 0.707369829 |
| c12.pcaec445            | 0.01648736   | 0.043832591 | 0.707391802 |
| c182.pcaac386           | -0.0045926   | 0.012211056 | 0.707422994 |
| smc181.pcaec383         | 0.029101439  | 0.077397139 | 0.707497403 |
| pcaec383.pcaac425       | -0.049136201 | 0.130691433 | 0.707519945 |
| pcaac426.pcaac360       | 0.012022295  | 0.031989812 | 0.707634706 |
| pcaac360.phenylalanine  | 0.01286374   | 0.034232906 | 0.707668229 |
| smc261.pcaec380         | 0.018584643  | 0.049459836 | 0.707682303 |
| smc260.pcaac240         | -0.003801053 | 0.010119092 | 0.707771577 |
| pcaac420.smc241         | -0.005085671 | 0.013539911 | 0.70779079  |
| c141.serine             | -0.017630893 | 0.046944555 | 0.707818628 |
| c101.c8                 | 0.030987604  | 0.082539297 | 0.707922446 |
| pcaac426.acetylnithoine | 0.011272182  | 0.030031241 | 0.707981778 |
| smc160.c18              | 0.011195366  | 0.029829826 | 0.708012    |
| pcaac363.pcaec386       | 0.006542095  | 0.017434619 | 0.708065334 |
| kynurenine.lysopcac140  | 0.000296781  | 0.000790958 | 0.708079033 |
| c3.methioninesulfoxide  | 0.005419889  | 0.014447336 | 0.708130583 |
| pcaec361.smc241         | -0.011408767 | 0.03041149  | 0.708131601 |
| pcaac386.c101           | -0.003981022 | 0.010613813 | 0.708181501 |
| pcaec422.pcaec444       | -0.048729099 | 0.129920937 | 0.708190405 |
| glutamine.taurine       | -0.012742096 | 0.033972999 | 0.708191859 |
| pcaac240.lysopcac140    | -0.001449189 | 0.003864541 | 0.708242985 |
| pcaac322.c3             | 0.018517898  | 0.0493985   | 0.708338589 |
| pcaec385.smc241         | 0.012095867  | 0.032276568 | 0.708420746 |
| pcaac300.pcaac385       | -0.013758523 | 0.036715651 | 0.708439355 |
| c8.smc161               | 0.024803211  | 0.066239431 | 0.708650119 |
| lysopcac204.methionine  | -0.018114848 | 0.048404046 | 0.70880255  |
| pcaac341.histidine      | -0.018099697 | 0.048378042 | 0.708885703 |
| pcaac360.pcaec301       | -0.032969319 | 0.088130418 | 0.708910555 |
| pcaec363.lysopcac181    | 0.015383707  | 0.041130324 | 0.708965081 |
| pcaac365.pcaec383       | 0.0354973    | 0.094909589 | 0.708973792 |
| isoleucine.c162         | 0.035968701  | 0.096171588 | 0.708978432 |
| c4.pcaec341             | -0.023566833 | 0.063014356 | 0.70898882  |
| pcaac401.pcaac360       | -0.028074407 | 0.075083458 | 0.709049789 |
| histidine.pcaac341      | -0.001571939 | 0.004204387 | 0.709071031 |
| pcaac365.pcaac384       | -0.029628648 | 0.079255109 | 0.709102036 |
| c0.pcaac240             | 0.008645442  | 0.023131796 | 0.709170237 |
| pcaac383.c8             | -0.012868675 | 0.034437467 | 0.709218261 |
| c18.spermidine          | 0.029484658  | 0.078944749 | 0.709365017 |
| c3.smc241               | 0.021604646  | 0.057846986 | 0.709369128 |
| pcaac343.c162           | -0.029375498 | 0.078668307 | 0.709420824 |
| asparagine.pcaac425     | 0.029475273  | 0.078954786 | 0.709488522 |

|                              |              |             |             |
|------------------------------|--------------|-------------|-------------|
| c16.isoleucine               | 0.011403154  | 0.030545573 | 0.709490218 |
| pcaec406.smc180              | 0.010738638  | 0.028768552 | 0.709519266 |
| smohc141.lysopcac161         | 0.027969772  | 0.074955389 | 0.709611873 |
| c4.pcaac401                  | -0.001397689 | 0.003746458 | 0.709673472 |
| pcaec421.tyrosine            | -0.031524031 | 0.084521066 | 0.709745359 |
| creatinine.pcaac406          | 0.011258674  | 0.030197703 | 0.70984957  |
| pcaec364.pcaac422            | -0.021717008 | 0.058250118 | 0.709856047 |
| methioninesulfoxide.smc241   | -0.008437464 | 0.022634573 | 0.709896562 |
| asparagine.pcaec444          | -0.025846506 | 0.069345509 | 0.709932339 |
| pcaac422.lysopcac160         | 0.020081784  | 0.053882675 | 0.70995168  |
| c5.pcaec364                  | 0.016726347  | 0.044882376 | 0.709969445 |
| pcaec361.c102                | 0.015208835  | 0.040812844 | 0.70998614  |
| pcaec406.lysopcac280         | 0.00253257   | 0.006798657 | 0.710088536 |
| pcaac365.pcaac424            | -0.00551872  | 0.014815397 | 0.710096983 |
| kynurenine.pcaec405          | -0.026601277 | 0.071426784 | 0.710150311 |
| c141 oh.threonine            | 0.014902239  | 0.040014716 | 0.710156418 |
| pcaac344.pcaec384            | 0.014027053  | 0.037669014 | 0.710188016 |
| c141 oh.lysopcac281          | 0.008015597  | 0.021529128 | 0.710234353 |
| smc261.pcaac402              | 0.011368515  | 0.030542239 | 0.710302193 |
| pcaac425.smc160              | -0.02495385  | 0.067040457 | 0.710303634 |
| serine.c141 oh               | 0.043781765  | 0.117626392 | 0.710311346 |
| pcaac401.pcaac403            | -0.034970118 | 0.093976903 | 0.710382964 |
| serine.pcaac406              | -0.011348777 | 0.030498144 | 0.710383168 |
| pcaec343.pcaac404            | -0.002775347 | 0.007460257 | 0.710454542 |
| prolinr.c162                 | 0.040416322  | 0.108679604 | 0.710553    |
| smohc161.pcaac363            | -0.002090794 | 0.005623223 | 0.710605694 |
| lysopcac182.c8               | 0.021896958  | 0.058892448 | 0.71060679  |
| putrescine.isoleucine        | -0.006214009 | 0.016718329 | 0.710699101 |
| pcaac384.pcaac343            | -0.009521594 | 0.025621162 | 0.710742428 |
| pcaac402.histidine           | -0.042669076 | 0.114860178 | 0.710848648 |
| arginine.pcaec340            | -0.023853592 | 0.064216285 | 0.710870978 |
| c0.lysopcac160               | -0.00212176  | 0.005714499 | 0.710992014 |
| pcaac403.pcaac425            | -0.067034086 | 0.180554847 | 0.711012074 |
| isoleucine.smc240            | -0.010918871 | 0.029418855 | 0.711097553 |
| arginine.pcaac401            | 0.000629706  | 0.001696805 | 0.711126712 |
| pcaec421.lysopcac140         | -0.000784093 | 0.002113204 | 0.711177494 |
| pcaec404.glycine             | 0.008866182  | 0.023898589 | 0.711216633 |
| pcaec341.asparticacid        | 0.015451827  | 0.041651552 | 0.711226635 |
| phenylalanine.glutamicacid   | 0.022146865  | 0.059698899 | 0.711228349 |
| smohc141.pcaac420            | -0.029803794 | 0.080353479 | 0.711278538 |
| pcaac343.pcaec341            | 0.037580709  | 0.101362112 | 0.711391208 |
| pcaec401.taurine             | 0.024304956  | 0.065583414 | 0.711510778 |
| smohc161.transhydroxyproline | 0.007564446  | 0.020417864 | 0.711595756 |

|                                |              |             |             |
|--------------------------------|--------------|-------------|-------------|
| pcaac322.c0                    | 0.000344335  | 0.000929517 | 0.711622935 |
| pcaac240.pcaec383              | -0.037114037 | 0.100191241 | 0.711632769 |
| methioninesulfoxide.glycine    | 0.007180197  | 0.019387773 | 0.711696182 |
| isoleucine.pcaec364            | -0.008629793 | 0.02330525  | 0.711735351 |
| smc261.c102                    | 0.009183274  | 0.024800991 | 0.711746822 |
| pcaec401.tryptophan            | -0.002716416 | 0.007337442 | 0.711795515 |
| c142.leucine                   | -0.003491622 | 0.009432963 | 0.711841459 |
| spermidine.glutamicacid        | -0.013775618 | 0.037218425 | 0.711857956 |
| glutamine.pcaec343             | -0.023571258 | 0.063697667 | 0.711917425 |
| lysopcac181.ornithine          | 0.018423418  | 0.049789282 | 0.711933188 |
| pcaac362.smc180                | -0.004269708 | 0.011544681 | 0.712071325 |
| pcaec300.pcaec360              | -0.002770249 | 0.007490628 | 0.712081228 |
| c8.putrescine                  | -0.014562894 | 0.039392202 | 0.712184484 |
| glutamicacid.pcaec343          | 0.029317396  | 0.079305178 | 0.712193088 |
| pcaac381.pcaac384              | 0.02032857   | 0.054990476 | 0.712195924 |
| pcaec406.pcaec321              | -0.021151925 | 0.057238748 | 0.712296898 |
| pcaac362.lysopcac170           | 0.003785542  | 0.01024397  | 0.712296909 |
| pcaec403.pcaac386              | 0.009064187  | 0.024528939 | 0.712303014 |
| pcaac321.isoleucine            | 0.015470093  | 0.041880855 | 0.712412276 |
| pcaac365.pcaac426              | 0.029439818  | 0.079704688 | 0.712428799 |
| c16.smc180                     | 0.007391874  | 0.020013617 | 0.712442891 |
| pcaec301.lysine                | -0.03504334  | 0.094907692 | 0.712521857 |
| c181.tryptophan                | 0.012534715  | 0.033952461 | 0.712560352 |
| pcaec380.smc160                | -0.013177383 | 0.035703601 | 0.712640006 |
| methioninesulfoxide.methionine | 0.012997151  | 0.035220884 | 0.712683777 |
| pcaac341.lysopcac280           | -0.007343042 | 0.01990109  | 0.712714587 |
| pcaec386.pcaac401              | -0.001037993 | 0.002813335 | 0.71273123  |
| smc181.pcaec422                | 0.026082685  | 0.070722416 | 0.712843411 |
| pcaac342.c141oh                | 0.034787245  | 0.09432935  | 0.712857307 |
| lysopcac204.pcaec446           | -0.023863346 | 0.064771816 | 0.713127458 |
| ornithine.pcaec425             | -0.030917714 | 0.083932157 | 0.713169266 |
| c181.pcaec384                  | 0.008658035  | 0.023505995 | 0.71319342  |
| smc180.c0                      | 0.000258773  | 0.000702588 | 0.713208085 |
| pcaac322.smc181                | -0.006216138 | 0.016885344 | 0.713338462 |
| pcaac425.c4                    | -0.007471223 | 0.020294789 | 0.713340708 |
| smc241.lysopcac281             | -0.006296412 | 0.017104064 | 0.713349156 |
| pcaec381.pcaec320              | 0.034443101  | 0.09360448  | 0.71346779  |
| pcaec386.smohc222              | -0.00177716  | 0.00483393  | 0.713706877 |
| pcaac385.pcaac344              | -0.035400677 | 0.096302637 | 0.713740118 |
| glutamicacid.lysopcac281       | 0.00447834   | 0.012184464 | 0.713779633 |
| smohc141.spermidine            | -0.025302533 | 0.068847514 | 0.713801608 |
| pcaec420.pcaac240              | -0.00423371  | 0.011525689 | 0.713941059 |
| pcaec381.c4                    | -0.008939383 | 0.024339996 | 0.713983359 |

|                                |              |             |             |
|--------------------------------|--------------|-------------|-------------|
| pcaec364.smohc241              | -0.02535576  | 0.069084181 | 0.714165167 |
| c181.asymmetricdimethylarginin | -0.008715265 | 0.023757785 | 0.714305616 |
| pcaec404.pcaec446              | 0.024423041  | 0.066582835 | 0.714329013 |
| smc181.pcaec322                | 0.038867354  | 0.105978566 | 0.714373335 |
| prolinr.pcaac403               | -0.003837661 | 0.010465148 | 0.714402079 |
| pcaac361.alanine               | 0.031164626  | 0.085003477 | 0.714462395 |
| pcaac363.lysopcac203           | -0.009084908 | 0.024779875 | 0.71446479  |
| pcaac380.lysopcac280           | 0.002767985  | 0.00755068  | 0.714492304 |
| pcaec383.pcaec382              | 0.015655171  | 0.042716552 | 0.714565167 |
| pcaec365.pcaec446              | -0.033273557 | 0.090822189 | 0.714662124 |
| pcaec401.pcaec422              | -0.025714651 | 0.070228259 | 0.714811876 |
| asparagine.lysopcac160         | 0.003877118  | 0.01058926  | 0.714827776 |
| pcaac344.lysopcac182           | -0.006079303 | 0.016605767 | 0.71485822  |
| smohc221.phenylalanine         | 0.021692803  | 0.059256675 | 0.714868564 |
| pcaac384.pcaac421              | -0.008590218 | 0.023466116 | 0.714878246 |
| pcaac424.pcaec423              | 0.040387948  | 0.11034258  | 0.714912332 |
| acetylornithoine.smc260        | -0.014446117 | 0.039471765 | 0.714939987 |
| asparagine.lysopcac281         | -0.004724168 | 0.012912728 | 0.715038617 |
| serine.smohc241                | -0.029707216 | 0.081229297 | 0.715137754 |
| pcaac363.arginine              | 0.027019532  | 0.073880974 | 0.715140287 |
| lysopcac180.pcaac320           | 0.014286295  | 0.039077663 | 0.715236939 |
| asymmetricdimethylarginine.pca | 0.02164099   | 0.059208734 | 0.715299418 |
| smohc161.lysopcac280           | 0.004007651  | 0.010965189 | 0.715310434 |
| asparticacid.threonine         | -0.016563384 | 0.045318695 | 0.715311747 |
| alphaaminoadipicacid.pcaec321  | 0.006084369  | 0.016651165 | 0.71537488  |
| h1.lysopcac140                 | 0.000352416  | 0.000964588 | 0.715410678 |
| pcaac424.c16                   | 0.008412977  | 0.023032179 | 0.715472773 |
| pcaec446.pcaac365              | 0.020727056  | 0.056747582 | 0.715488058 |
| c12.pcaac401                   | -0.0011575   | 0.003169885 | 0.715558688 |
| methionine.asparagine          | 0.004113839  | 0.011267306 | 0.715590187 |
| pcaac401.c162                  | -0.034571189 | 0.094689299 | 0.715598794 |
| c12.smc161                     | 0.015760617  | 0.043180293 | 0.715677531 |
| smc160.pcaac404                | -0.001782061 | 0.004883786 | 0.715753711 |
| pcaec404.pcaac320              | -0.026429181 | 0.072442399 | 0.715800665 |
| c51.pcaec401                   | -0.007537702 | 0.020662518 | 0.715822646 |
| pcaac403.c102                  | 0.018821665  | 0.051595621 | 0.715829249 |
| c14.threonine                  | 0.008806825  | 0.024146384 | 0.715878006 |
| pcaec422.c8                    | -0.016460668 | 0.045141504 | 0.715937935 |
| smohc141.histidine             | -0.022481675 | 0.061658067 | 0.715958367 |
| serotonin.pcaac401             | 0.000663259  | 0.001819188 | 0.715979127 |
| c10.pcaec422                   | 0.012829142  | 0.035189114 | 0.715989324 |
| pcaec365.c102                  | 0.008976186  | 0.024620949 | 0.715990704 |
| smohc221.asparagine            | 0.004487912  | 0.012310401 | 0.716000055 |

|                               |              |             |             |
|-------------------------------|--------------|-------------|-------------|
| pcaec343.smc161               | -0.028796887 | 0.079000307 | 0.716034651 |
| pcaac363.pcaec321             | -0.002037008 | 0.005589647 | 0.716102422 |
| pcaec301.asymmetricdimethylar | -0.009701711 | 0.026635315 | 0.716238577 |
| pcaac383.pcaac401             | -0.001721629 | 0.004726665 | 0.716242173 |
| kynurenine.pcaec341           | 0.019909863  | 0.054674726 | 0.716306575 |
| smc261.methioninesulfoxide    | 0.006744064  | 0.018522518 | 0.716344069 |
| pcaac402.asparticacid         | -0.031754699 | 0.087268996 | 0.716514919 |
| pcaac363.pcaac401             | -0.000987377 | 0.002713648 | 0.716526653 |
| pcaec383.smohc161             | -0.009405427 | 0.025857118 | 0.716608297 |
| pcaec362.c3                   | 0.009733878  | 0.026761919 | 0.716626873 |
| pcaec364.acetylmethionine     | 0.014091956  | 0.038749107 | 0.716663738 |
| alphaaminoadipicacid.pcaac401 | 0.000497967  | 0.00136966  | 0.716740027 |
| pcaec322.pcaec402             | -0.027298965 | 0.075093171 | 0.716765942 |
| c16.pcaac364                  | -0.031980642 | 0.088000409 | 0.716855285 |
| smc180.pcaec446               | -0.009583493 | 0.026370878 | 0.71685732  |
| c141oh.methionine             | -0.0109948   | 0.030256558 | 0.716876908 |
| methionine.histidine          | -0.031146235 | 0.085751648 | 0.717004542 |
| methioninesulfoxide.c162      | -0.028851729 | 0.079435123 | 0.717006914 |
| pcaec341.pcaec362             | -0.027137808 | 0.074737653 | 0.717084164 |
| pcaec342.pcaec420             | -0.007580105 | 0.020880772 | 0.717150593 |
| pcaac424.smc260               | 0.016944024  | 0.046684862 | 0.717205537 |
| c102.pcaac425                 | 0.034304958  | 0.094526503 | 0.717228701 |
| c16.pcaac401                  | -0.000938033 | 0.002585186 | 0.717276615 |
| pcaec341.pcaec384             | 0.040613956  | 0.111931506 | 0.717278743 |
| pcaac420.c102                 | -0.011123992 | 0.030662771 | 0.717324622 |
| pcaec363.smc260               | 0.014645183  | 0.040369252 | 0.717327843 |
| pcaac406.c0                   | -0.001015229 | 0.002798783 | 0.71735868  |
| pcaac342.creatinine           | -0.00305181  | 0.008413487 | 0.71736688  |
| c51dc.smc261                  | -0.021042966 | 0.058014813 | 0.717375183 |
| pcaac385.pcaac364             | -0.029581508 | 0.081556981 | 0.71738072  |
| pcaec301.pcaac343             | -0.009604109 | 0.026485449 | 0.717448838 |
| citruline.pcaac401            | 0.000490031  | 0.0013514   | 0.717455417 |
| c16.pcaac386                  | -0.011041103 | 0.030452176 | 0.717483445 |
| pcaec300.pcaec322             | -0.026264216 | 0.072441505 | 0.717494123 |
| lysine.lysopcac204            | -0.00909964  | 0.025103431 | 0.717547549 |
| prolinr.c10                   | 0.004840876  | 0.013355104 | 0.717556536 |
| kynurenine.serotonin          | 0.031114514  | 0.085839369 | 0.717556632 |
| smohc161.pcaac425             | 0.025623104  | 0.070716472 | 0.717659496 |
| pcaac401.pcaac386             | 0.006622494  | 0.018278377 | 0.717676418 |
| lysopcac161.pcaec444          | -0.052042605 | 0.143741455 | 0.71786727  |
| pcaec384.pcaec380             | 0.017201328  | 0.047516686 | 0.717905278 |
| smc181.pcaac361               | 0.016727026  | 0.046214923 | 0.717954577 |
| pcaac405.lysopcac140          | -0.001201759 | 0.003322058 | 0.71809523  |

|                              |              |             |             |
|------------------------------|--------------|-------------|-------------|
| pcaec405.pcaac424            | 0.007833735  | 0.021656361 | 0.718111827 |
| ornithine.taurine            | -0.014489444 | 0.040064969 | 0.718171733 |
| pcaec300.pcaec321            | 0.035244422  | 0.097488309 | 0.71826427  |
| pcaec382.pcaec321            | 0.012564638  | 0.034758022 | 0.718290933 |
| lysopcac204.pcaac363         | -0.005824952 | 0.016115908 | 0.718326538 |
| asparticacid.pcaac385        | -0.014118557 | 0.039068893 | 0.718375152 |
| pcaec402.pcaec403            | -0.015793232 | 0.04370774  | 0.718404026 |
| pcaac322.putrescine          | -0.015323701 | 0.042408555 | 0.718405569 |
| c102.pcaac424                | 0.004640834  | 0.012844657 | 0.718428346 |
| pcaec340.histidine           | -0.024534786 | 0.067910187 | 0.71844455  |
| smc241.c5                    | -0.003139973 | 0.008694003 | 0.718532205 |
| pcaac300.serotonin           | -0.031284918 | 0.086628885 | 0.718553143 |
| pcaec401.pcaac360            | 0.012923994  | 0.035788101 | 0.71856196  |
| c0.pcaac321                  | 0.013591601  | 0.037641912 | 0.718598639 |
| pcaac404.c102                | -0.010633597 | 0.029453431 | 0.718632517 |
| pcaac323.smc261              | -0.016995025 | 0.047087178 | 0.718710105 |
| pcaac343.pcaec385            | -0.016456811 | 0.045596593 | 0.718713735 |
| c181.lysopcac140             | 0.000402066  | 0.001114079 | 0.718733733 |
| pcaec443.pcaec384            | -0.008109465 | 0.022472947 | 0.718764008 |
| c182.smc181                  | 0.009632967  | 0.026697075 | 0.718786178 |
| creatinine.lysopcac170       | -0.006903182 | 0.019135092 | 0.718834297 |
| c182.histidine               | -0.030137154 | 0.08355107  | 0.718876755 |
| pcaec380.lysopcac203         | -0.013682568 | 0.037933049 | 0.718876977 |
| prolinr.pcaec386             | 0.003715072  | 0.010300181 | 0.718894006 |
| c162.pcaac406                | -0.019648961 | 0.054489855 | 0.718954979 |
| smc241.smc202                | -0.020807482 | 0.057707349 | 0.718976991 |
| lysopcac204.c51              | -0.025467464 | 0.070640631 | 0.719012458 |
| c2.smohe221                  | -0.035154368 | 0.097554185 | 0.719134895 |
| c10.smc161                   | 0.021104116  | 0.058568827 | 0.719155166 |
| c5.pcaac401                  | -0.001554332 | 0.004314185 | 0.719189617 |
| pcaec363.isoleucine          | 0.007299876  | 0.020268513 | 0.719283281 |
| pcaec301.c16                 | 0.010028157  | 0.027844264 | 0.719288362 |
| isoleucine.pcaec360          | 0.003600322  | 0.00999697  | 0.719296058 |
| smc241.c4                    | -0.011963906 | 0.033221311 | 0.719306419 |
| pcaac342.methioninesulfoxide | 0.00470452   | 0.013065057 | 0.719338722 |
| c142.pcaac363                | 0.002894363  | 0.008041551 | 0.719456715 |
| glutamicacid.valine          | 0.037625692  | 0.104539083 | 0.719461301 |
| c14.pcaec342                 | 0.027063574  | 0.075218665 | 0.719551743 |
| c181.pcaac321                | 0.013705259  | 0.038105797 | 0.719652709 |
| pcaec341.pcaac323            | 0.03534278   | 0.098279793 | 0.719689605 |
| pcaec402.lysopcac160         | -0.014742411 | 0.041000017 | 0.719721727 |
| c12.lysopcac182              | 0.01480333   | 0.041171177 | 0.719733061 |
| pcaac380.valine              | -0.028151931 | 0.078296942 | 0.719734759 |

|                          |              |             |             |
|--------------------------|--------------|-------------|-------------|
| leucine.pcaec361         | 0.002798441  | 0.007783736 | 0.719756627 |
| pcaac341.pcaec385        | -0.020482516 | 0.056974719 | 0.719773238 |
| lysopcac204.threonine    | -0.015337653 | 0.042683837 | 0.719900258 |
| lysopcac161.pcaec322     | 0.030385783  | 0.084570088 | 0.719926064 |
| pcaec444.pcaac240        | -0.006306009 | 0.017551458 | 0.719933621 |
| pcaec364.pcaac406        | -0.032986988 | 0.091813374 | 0.719936523 |
| pcaec343.pcaac281        | 0.000612759  | 0.001705551 | 0.719943783 |
| lysopcac203.pcaac240     | -0.005498334 | 0.015305168 | 0.719963505 |
| pcaec341.tyrosine        | -0.022018051 | 0.061296575 | 0.719994582 |
| c8.pcaec445              | 0.021711484  | 0.060481611 | 0.720165217 |
| pcaec386.pcaec385        | -0.044409078 | 0.123723939 | 0.720194922 |
| c0.smc240                | 0.028823515  | 0.080308045 | 0.720213514 |
| pcaac341.smohe221        | -0.02263154  | 0.063081643 | 0.720322537 |
| phenylalanine.isoleucine | 0.007725972  | 0.021540472 | 0.720392342 |
| pcaec402.c5              | -0.002845549 | 0.007933694 | 0.720396798 |
| pcaec386.methionine      | -0.009630354 | 0.026851807 | 0.720410317 |
| smc260.arginine          | -0.012777624 | 0.035637421 | 0.720487304 |
| pcaec364.arginine        | -0.022332546 | 0.062297736 | 0.720535291 |
| ornithine.pcaec401       | 0.006777942  | 0.018908495 | 0.720550731 |
| spermidine.c4            | -0.029785289 | 0.083092344 | 0.720550801 |
| pcaac365.asparagine      | 0.004943658  | 0.013796597 | 0.720652054 |
| pcaec321.pcaac401        | -0.000669431 | 0.001868823 | 0.720737534 |
| pcaac405.pcaac384        | -0.020403451 | 0.056968512 | 0.720779968 |
| lysopcac161.pcaac343     | -0.013909186 | 0.038846156 | 0.720850818 |
| asparagine.pcaac401      | 0.000354155  | 0.000989368 | 0.72092335  |
| smc161.pcaac341          | 0.00134221   | 0.003750469 | 0.72098539  |
| kynurenine.c5            | -0.003332402 | 0.009313114 | 0.721029995 |
| pcaec386.pcaac343        | -0.010789224 | 0.030160281 | 0.721096249 |
| lysopcac170.pcaec402     | -0.009815853 | 0.027439337 | 0.721096486 |
| serotonin.methionine     | 0.011719954  | 0.032764398 | 0.721115381 |
| pcaac344.pcaec422        | -0.008370351 | 0.023400784 | 0.721121813 |
| smc261.pcaac401          | -0.002644386 | 0.007392873 | 0.721122851 |
| pcaec382.taurine         | 0.023134847  | 0.0646874   | 0.721162598 |
| pcaac402.pcaac406        | -0.026088516 | 0.072948768 | 0.721172144 |
| pcaec301.lysopcac180     | -0.023471035 | 0.065630822 | 0.721176457 |
| pcaec446.ornithine       | 0.007335787  | 0.020514197 | 0.721196273 |
| c162.prolinr             | 0.01306074   | 0.036524537 | 0.721201863 |
| c10.lysopcac181          | -0.033656082 | 0.094152479 | 0.721294864 |
| pcaac402.smc161          | 0.052857459  | 0.147879168 | 0.721314854 |
| citruline.c162           | 0.046513695  | 0.130138956 | 0.721330689 |
| pcaec422.pcaec446        | -0.014105448 | 0.039465315 | 0.721332048 |
| lysopcac140.alanine      | 0.009347267  | 0.026153032 | 0.721337397 |
| smohc241.pcaec361        | 0.003773856  | 0.01055918  | 0.721341968 |



|                                |              |             |             |
|--------------------------------|--------------|-------------|-------------|
| prolinr.acetylmethionine       | 0.019909714  | 0.055724718 | 0.721426795 |
| c141oh.pcaac364                | -0.013852591 | 0.038773874 | 0.721442347 |
| smc260.asymmetricdimethylargi  | 0.008516671  | 0.023848026 | 0.721549474 |
| alphaaminoadipicacid.pcaac360  | 0.008257411  | 0.023124046 | 0.721572406 |
| c181.smc180                    | 0.006074374  | 0.017012232 | 0.721596881 |
| c8.pcaac426                    | -0.018286365 | 0.05122377  | 0.721648697 |
| c14.smc261                     | -0.010560099 | 0.02958229  | 0.721660773 |
| asymmetricdimethylarginine.pca | 0.023559412  | 0.066019325 | 0.721748439 |
| pcaec403.c4                    | -0.010357384 | 0.029038454 | 0.721881479 |
| pcaac403.smohc161              | 0.006292065  | 0.017650092 | 0.722022776 |
| lysopcac170.c14                | -0.023103021 | 0.064813671 | 0.722049795 |
| lysopcac161.c0                 | 0.000323524  | 0.000907742 | 0.722085347 |
| pcaac323.methioninesulfoxide   | 0.007975404  | 0.022381125 | 0.722130328 |
| pcaec420.smc260                | -0.008666664 | 0.024322987 | 0.722152239 |
| pcaac323.pcaec386              | 0.003438219  | 0.00964965  | 0.722160281 |
| smohc222.pcaec386              | 0.006667704  | 0.018715311 | 0.722186424 |
| smohc161.pcaac281              | 0.001137809  | 0.003193843 | 0.722200689 |
| acetylmethionine.smc261        | 0.010233712  | 0.028726418 | 0.722203321 |
| pcaec386.lysopcac281           | 0.005636754  | 0.015822864 | 0.722208049 |
| smc240.smc241                  | -0.005922172 | 0.016625495 | 0.722231054 |
| pcaec364.smc260                | 0.011363841  | 0.031903715 | 0.722244867 |
| c141oh.pcaac424                | 0.001865556  | 0.0052376   | 0.722249787 |
| pcaec444.smohc221              | -0.027140099 | 0.07620049  | 0.722263406 |
| pcaec406.c3                    | 0.008284964  | 0.023263735 | 0.722289431 |
| pcaec380.lysopcac140           | -0.000679456 | 0.001908087 | 0.722318724 |
| methionine.pcaac321            | 0.009410815  | 0.026429736 | 0.722336468 |
| histidine.pcaec343             | -0.031642318 | 0.088880038 | 0.722379563 |
| smc181.c3                      | 0.006823683  | 0.019168253 | 0.72239654  |
| smc161.c141                    | 0.007856865  | 0.022072052 | 0.722414771 |
| pcaec361.c5                    | 0.007619423  | 0.021407328 | 0.722443529 |
| pcaac323.pcaac343              | 0.008812936  | 0.024767294 | 0.722515498 |
| pcaac422.pcaac386              | 0.004703855  | 0.013222608 | 0.722579953 |
| c102.pcaec360                  | -0.002782594 | 0.007824049 | 0.722652516 |
| pcaec380.smc261                | -0.016623527 | 0.04674811  | 0.722688683 |
| pcaac362.pcaec405              | 0.021594689  | 0.060734516 | 0.722717903 |
| pcaac383.alanine               | 0.009948867  | 0.027993552 | 0.722837654 |
| pcaec380.smohc222              | 0.005498251  | 0.015470759 | 0.722839291 |
| smc240.c5                      | 0.008229237  | 0.023156774 | 0.722858495 |
| pcaac422.c102                  | -0.014063711 | 0.039578081 | 0.722880709 |
| pcaec362.lysopcac181           | 0.017540516  | 0.049371317 | 0.722928136 |
| alanine.pcaec401               | 0.006303018  | 0.017744872 | 0.722984369 |
| c0.pcaac406                    | -0.011922084 | 0.033573109 | 0.723054695 |
| pcaac300.taurine               | -0.008963408 | 0.025258095 | 0.72323068  |

|                            |              |             |             |
|----------------------------|--------------|-------------|-------------|
| serine.pcaac344            | 0.022408721  | 0.063173212 | 0.723345769 |
| c3.pcaac425                | 0.038330374  | 0.108064334 | 0.723360073 |
| leucine.pcaac421           | 0.017320156  | 0.048839155 | 0.723407095 |
| asparagine.pcaac364        | -0.013515289 | 0.038110683 | 0.723410178 |
| smc181.pcaec402            | -0.015934951 | 0.044937985 | 0.723435497 |
| pcaec446.pcaac300          | 0.016747505  | 0.047237574 | 0.72348102  |
| putrescine.c3              | -0.0075275   | 0.021233635 | 0.723503066 |
| h1.taurine                 | 0.023932095  | 0.067508589 | 0.723505952 |
| pcaec361.pcaac320          | 0.04625719   | 0.13050165  | 0.723541617 |
| glutamicacid.pcaac365      | -0.028284192 | 0.079803943 | 0.723568353 |
| pcaec384.arginine          | -0.014509855 | 0.040965974 | 0.723738913 |
| methionine.pcaac240        | -0.008312805 | 0.023470993 | 0.723753339 |
| pcaac421.c102              | -0.0130569   | 0.036868534 | 0.723772813 |
| smc261.pcaac300            | -0.027426772 | 0.077446328 | 0.72377912  |
| c18.glycine                | 0.007528885  | 0.021262089 | 0.723809061 |
| c16.ornithine              | 0.010897692  | 0.030779138 | 0.72383751  |
| pcaec405.smc241            | -0.009970798 | 0.028162047 | 0.723845055 |
| smc261.pcaec365            | -0.013326102 | 0.037639195 | 0.723846821 |
| pcaac366.pcaec384          | -0.008550784 | 0.024154382 | 0.723879015 |
| pcaec443.lysopcac140       | -0.000759066 | 0.002144417 | 0.723903228 |
| phenylalanine.c4           | 0.006942089  | 0.019612866 | 0.723916126 |
| pcaac342.pcaac424          | 0.008102678  | 0.022892135 | 0.723920282 |
| c4.c12                     | -0.013754376 | 0.038879833 | 0.724057842 |
| pcaec301.c101              | -0.004670967 | 0.013204026 | 0.72406765  |
| pcaec322.pcaac363          | -0.002527347 | 0.007145388 | 0.724105027 |
| pcaac403.pcaec445          | -0.039940054 | 0.112934899 | 0.724140685 |
| c101.smc260                | -0.011533216 | 0.032611938 | 0.724144749 |
| pcaac383.histidine         | 0.019676322  | 0.05568864  | 0.724386115 |
| smohc221.lysopcac181       | 0.013424794  | 0.038001844 | 0.724431354 |
| pcaac422.pcaec322          | 0.026377922  | 0.074671275 | 0.724441047 |
| smc160.pcaac344            | -0.021362404 | 0.060490579 | 0.72451686  |
| c102.pcaec340              | -0.02700839  | 0.076478454 | 0.724518555 |
| ornithine.smc160           | -0.025830395 | 0.073152173 | 0.72455248  |
| lysopcac140.c51            | -0.028411314 | 0.080467843 | 0.724573675 |
| smc261.transhydroxyproline | 0.01109702   | 0.031453683 | 0.724776767 |
| lysopcac204.pcaac384       | 0.018578465  | 0.05266375  | 0.724799137 |
| c4.taurine                 | 0.031661759  | 0.089754469 | 0.724810747 |
| c18.pcaac424               | 0.003160934  | 0.008961196 | 0.724828705 |
| pcaac360.ornithine         | 0.008304821  | 0.023547466 | 0.724867153 |
| pcaec385.c141              | -0.014471653 | 0.041039866 | 0.724912051 |
| pcaec406.taurine           | 0.027948592  | 0.079267194 | 0.724939836 |
| c0.threonine               | -0.017343314 | 0.049189084 | 0.72494173  |
| phenylalanine.putrescine   | -0.010146059 | 0.028784448 | 0.725016952 |

|                                |              |             |             |
|--------------------------------|--------------|-------------|-------------|
| alphaaminoadipicacid.pcaec444  | 0.025642628  | 0.072777391 | 0.725122237 |
| smohc222.c4                    | -0.009459885 | 0.026851015 | 0.725147056 |
| pcaec322.pcaac401              | -0.000905535 | 0.002570328 | 0.725152158 |
| smc260.pcaac364                | 0.013524805  | 0.038401113 | 0.725230786 |
| c4.glutamicacid                | 0.018510439  | 0.052558523 | 0.725239044 |
| pcaac421.pcaac365              | 0.030437601  | 0.086440636 | 0.725288257 |
| asparagine.pcaec384            | 0.011796831  | 0.033510124 | 0.725350821 |
| smc260.transhydroxyproline     | 0.011367635  | 0.03230456  | 0.725461807 |
| pcaec364.c2                    | -0.020715376 | 0.058873807 | 0.72548339  |
| c18.c181                       | -0.004538768 | 0.012899473 | 0.725486262 |
| glutamine.smc160               | 0.022734365  | 0.064631945 | 0.725565287 |
| pcaec381.histidine             | 0.021842934  | 0.06211405  | 0.725634667 |
| serotonin.creatinine           | 0.003138122  | 0.008924712 | 0.725662289 |
| pcaec422.tryptophan            | -0.00165404  | 0.004706072 | 0.725776204 |
| pcaac385.pcaac401              | -0.000958057 | 0.002726662 | 0.725853417 |
| kynurenine.c182                | 0.024569082  | 0.069927275 | 0.725864119 |
| pcaac240.pcaec361              | -0.005759958 | 0.016398175 | 0.725935866 |
| pcaac426.pcaec420              | 0.029088957  | 0.082818975 | 0.725951313 |
| pcaac281.methioninesulfoxide   | 0.003999026  | 0.011387293 | 0.725990377 |
| c141.smc261                    | 0.018739317  | 0.053363892 | 0.726007023 |
| pcaec361.pcaac401              | -0.000785149 | 0.002236021 | 0.726025062 |
| c142.pcaac386                  | 0.005581334  | 0.015896742 | 0.726053224 |
| pcaac401.smc241                | -0.007737707 | 0.022041711 | 0.726091289 |
| creatinine.leucine             | -0.003682769 | 0.010492409 | 0.72613226  |
| ornithine.smc241               | -0.004148574 | 0.011819893 | 0.726140735 |
| pcaec425.pcaec361              | 0.005218397  | 0.014873035 | 0.726230131 |
| pcaac342.pcaac240              | -0.005962715 | 0.016995377 | 0.726244801 |
| pcaac425.pcaac401              | -0.002349514 | 0.00669937  | 0.726347073 |
| pcaac320.histidine             | -0.01770514  | 0.050489948 | 0.72637708  |
| c14.histidine                  | -0.020032397 | 0.057133486 | 0.726408656 |
| pcaec341.c4                    | -0.005213057 | 0.014867929 | 0.726408773 |
| c5.pcaec321                    | 0.013652129  | 0.038938443 | 0.726420988 |
| lysopcac140.tryptophan         | -0.000916802 | 0.002615021 | 0.726433966 |
| lysopcac170.transhydroxyprolin | -0.013187639 | 0.037620172 | 0.726466621 |
| c102.pcaec444                  | 0.05001822   | 0.142692382 | 0.726478002 |
| pcaac381.smc241                | -0.011056558 | 0.031542456 | 0.726479819 |
| glutamine.valine               | 0.02216822   | 0.06324307  | 0.726483778 |
| pcaac281.pcaec360              | -0.002257447 | 0.006440621 | 0.726500762 |
| pcaac240.c2                    | -0.053213719 | 0.151867061 | 0.726579152 |
| c101.pcaec321                  | -0.008144793 | 0.023245593 | 0.726591612 |
| prolinr.smc240                 | -0.018366362 | 0.052428004 | 0.72663968  |
| pcaac420.c18                   | 0.012325711  | 0.035189156 | 0.726673916 |
| lysopcac203.pcaac341           | 0.003864698  | 0.011036209 | 0.726738785 |

|                                 |              |             |             |
|---------------------------------|--------------|-------------|-------------|
| h1.pcaac380                     | -0.014801139 | 0.042267474 | 0.726742915 |
| asymmetricdimethylarginine.pca  | -0.015472383 | 0.044205962 | 0.726871169 |
| pcaec384.smc240                 | -0.007539439 | 0.021545249 | 0.726924798 |
| pcaec321.lysopcac180            | -0.024188099 | 0.069124287 | 0.726934703 |
| pcaac420.pcaac402               | -0.015854814 | 0.045311706 | 0.726946978 |
| pcaec365.pcaec382               | 0.004132413  | 0.011810523 | 0.726956699 |
| pcaac321.smc260                 | 0.00972908   | 0.027808863 | 0.726984478 |
| pcaec384.c16                    | 0.012789275  | 0.036557896 | 0.726998849 |
| pcaec380.pcaac365               | -0.022111757 | 0.063207108 | 0.727003319 |
| pcaec445.smc161                 | 0.021232305  | 0.060709845 | 0.727075285 |
| pcaec385.pcaec384               | 0.018406743  | 0.052632528 | 0.727084505 |
| leucine.pcaec343                | -0.028480637 | 0.081440554 | 0.727092792 |
| citruline.smc161                | -0.020822559 | 0.059549021 | 0.727122645 |
| smc261.pcaec403                 | 0.008673746  | 0.024806691 | 0.727135676 |
| c181.smohc161                   | 0.005751616  | 0.016453143 | 0.727194045 |
| pcaac321.lysopcac160            | -0.0074862   | 0.021419165 | 0.727243547 |
| pcaec380.pcaec383               | 0.049476118  | 0.141599809 | 0.727319461 |
| smohc141.c5                     | -0.001525413 | 0.004365748 | 0.727322048 |
| c0.pcaec321                     | 0.003643012  | 0.010427233 | 0.727344425 |
| pcaec402.smc261                 | -0.02418974  | 0.069251517 | 0.727398417 |
| histidine.pcaac364              | 0.027256555  | 0.078033647 | 0.72740615  |
| glutamine.lysopcac281           | -0.005294618 | 0.015160554 | 0.727448027 |
| leucine.h1                      | -0.000643343 | 0.001842367 | 0.727480183 |
| pcaac281.smc241                 | -0.013497194 | 0.038661477 | 0.727541066 |
| glycine.c101                    | -0.003387532 | 0.009706461 | 0.727626851 |
| c182.pcaec364                   | 0.006885733  | 0.019731467 | 0.72764596  |
| putrescine.pcaac421             | 0.0081405    | 0.023332091 | 0.727702177 |
| smc160.pcaec422                 | 0.009873808  | 0.02830366  | 0.727735463 |
| lysopcac140.pcaec422            | -0.015174875 | 0.043508957 | 0.727793005 |
| pcaec384.lysopcac281            | 0.011735568  | 0.033651122 | 0.727818196 |
| pcaec401.pcaac401               | -0.001232105 | 0.003534801 | 0.727951536 |
| lysine.pcaec361                 | 0.006637127  | 0.019049058 | 0.728057469 |
| alphaaminoadipicacid.pcaec424   | 0.007924208  | 0.022748637 | 0.728121278 |
| asymmetricdimethylarginine.lysc | 0.028940536  | 0.08308525  | 0.728132001 |
| pcaac386.lysopcac161            | -0.028374144 | 0.081462818 | 0.7281436   |
| pcaac320.pcaec383               | 0.031380556  | 0.090109646 | 0.728188059 |
| c51.pcaec362                    | 0.003473117  | 0.009976277 | 0.728271226 |
| smohc222.pcaec341               | 0.023317675  | 0.066993984 | 0.728332166 |
| acetylmethionine.pcaac386       | 0.021043989  | 0.060464125 | 0.728343662 |
| lysine.pcaec421                 | 0.000543198  | 0.001560841 | 0.728362082 |
| pcaac341.pcaec300               | -0.038075503 | 0.10941946  | 0.728391221 |
| lysopcac160.creatinine          | -0.002087963 | 0.006000537 | 0.728402211 |
| pcaac320.pcaec386               | 0.004259224  | 0.012245349 | 0.728506323 |

|                              |              |             |             |
|------------------------------|--------------|-------------|-------------|
| pcaec385.pcaec446            | -0.028700556 | 0.082565715 | 0.728667586 |
| pcaec443.asparagine          | -0.009867785 | 0.028401173 | 0.728791836 |
| pcaec342.pcaac420            | 0.018453913  | 0.053115579 | 0.728801929 |
| acetylmethionine.lysopcac280 | -0.003836583 | 0.011043964 | 0.728830089 |
| pcaac405.leucine             | -0.013210734 | 0.038044118 | 0.728938068 |
| c142.tryptophan              | 0.001377778  | 0.003968561 | 0.728994005 |
| c162.ornithine               | -0.009603607 | 0.02766677  | 0.729036041 |
| c182.lysopcac160             | 0.004168517  | 0.012010313 | 0.729065189 |
| pcaac240.pcaac364            | -0.025695146 | 0.074038521 | 0.729085506 |
| c162.c141oh                  | 0.053470848  | 0.154171568 | 0.729253524 |
| arginine.c0                  | -0.000223526 | 0.000644671 | 0.729326786 |
| pcaac363.lysopcac140         | 0.001363498  | 0.003932512 | 0.729330339 |
| lysine.pcaec341              | -0.013562973 | 0.039136636 | 0.729457818 |
| c51dc.lysopcac140            | 0.000361337  | 0.001042908 | 0.729520775 |
| lysopcac180.pcaec361         | 0.001981682  | 0.005721887 | 0.729623298 |
| pcaec365.ornithine           | 0.010605274  | 0.030637274 | 0.729756561 |
| serine.pcaac343              | -0.005592321 | 0.016156808 | 0.72977764  |
| pcaec444.pcaec384            | 0.015304626  | 0.044222252 | 0.729810292 |
| c102.lysopcac182             | 0.039325397  | 0.113644005 | 0.729843325 |
| pcaac401.c141oh              | 0.038077801  | 0.110054403 | 0.729880454 |
| pcaec382.pcaac421            | -0.009978098 | 0.028841694 | 0.729902807 |
| c51.pcaec341                 | -0.020111154 | 0.058136991 | 0.729928241 |
| pcaac403.lysine              | 0.033456526  | 0.096756721 | 0.730038557 |
| pcaac421.pcaac360            | -0.016721109 | 0.048368705 | 0.730097715 |
| lysopcac204.putrescine       | -0.009694821 | 0.028054864 | 0.730198579 |
| arginine.pcaec363            | 0.009620355  | 0.027844911 | 0.730250107 |
| c14.pcaec322                 | 0.015001952  | 0.043423293 | 0.73026219  |
| arginine.c5                  | -0.00647892  | 0.018756295 | 0.73030364  |
| pcaec360.pcaac401            | -0.000889206 | 0.00257452  | 0.730333078 |
| smc261.pcaac424              | -0.004884487 | 0.014151441 | 0.730504727 |
| c102.kynurenine              | -0.002187261 | 0.006337441 | 0.730523636 |
| pcaac281.pcaac401            | -0.001064017 | 0.003084471 | 0.730654056 |
| pcaec402.pcaac344            | -0.042683695 | 0.123735599 | 0.730654302 |
| c12.pcaec383                 | 0.024037852  | 0.069726938 | 0.730816489 |
| pcaec341.pcaec444            | 0.045506988  | 0.132028819 | 0.730867522 |
| pcaec443.methionine          | -0.011621594 | 0.033732923 | 0.730985157 |
| lysopcac204.lysopcac140      | -0.001375153 | 0.00399538  | 0.731234316 |
| pcaec420.pcaac425            | -0.029634797 | 0.086110607 | 0.731262624 |
| pcaac406.pcaac300            | -0.027680529 | 0.080438032 | 0.731281855 |
| pcaac424.c51dc               | 0.051669572  | 0.150149675 | 0.731283333 |
| lysopcac281.smc241           | -0.007608158 | 0.022109134 | 0.731284934 |
| glutamine.pcaec360           | 0.00221583   | 0.006439464 | 0.731297431 |
| smc202.pcaec321              | -0.015534978 | 0.045149917 | 0.731317095 |

|                         |              |             |             |
|-------------------------|--------------|-------------|-------------|
| c181.pcaec321           | 0.009469928  | 0.027529997 | 0.731384359 |
| pcaec402.methionine     | -0.009769249 | 0.028403327 | 0.731413226 |
| lysopcac203.pcaec420    | -0.01118606  | 0.032524235 | 0.73142623  |
| pcaac366.pcaec341       | -0.010904545 | 0.031707691 | 0.731442347 |
| pcaac362.pcaec362       | -0.006845916 | 0.019906602 | 0.731447402 |
| putrescine.pcaec321     | 0.017028503  | 0.049525575 | 0.731499378 |
| smohc221.pcaec383       | -0.021329018 | 0.062036185 | 0.731511958 |
| acetylmithoine.alanine  | -0.006598257 | 0.019198352 | 0.731607314 |
| smohc141.c8             | -0.018617291 | 0.054171513 | 0.731619022 |
| glutamine.methionine    | 0.011176484  | 0.032538431 | 0.731759692 |
| pcaac365.asparticacid   | -0.020767857 | 0.06050284  | 0.731933368 |
| pcaac300.pcaec405       | -0.019829963 | 0.057791488 | 0.732027021 |
| pcaec343.c3             | -0.012981087 | 0.037832602 | 0.73203484  |
| pcaec385.smohc161       | 0.01556271   | 0.045360037 | 0.732054406 |
| smohc241.c102           | 0.0118968    | 0.034677541 | 0.73207217  |
| pcaac384.smohc241       | -0.027564631 | 0.080357855 | 0.732106577 |
| pcaec424.c141oh         | 0.029791346  | 0.086885793 | 0.73221475  |
| c8.tryptophan           | 0.000865402  | 0.002524657 | 0.732289261 |
| c18.pcaec321            | 0.010110679  | 0.029507663 | 0.732390032 |
| smc261.pcaac403         | -0.00327922  | 0.009571078 | 0.732411264 |
| pcaac362.pcaac386       | -0.010571658 | 0.030856932 | 0.732422693 |
| smc160.pcaec446         | -0.008716836 | 0.025447559 | 0.732468647 |
| arginine.pcaec322       | -0.02353945  | 0.06873019  | 0.732506538 |
| pcaec363.glycine        | 0.014381988  | 0.042002055 | 0.732565973 |
| citruline.pcaac424      | -0.007395127 | 0.02160029  | 0.732602869 |
| pcaac402.pcaac360       | -0.025905507 | 0.075671786 | 0.732619404 |
| pcaac383.lysopcac170    | 0.003886708  | 0.011354313 | 0.732641338 |
| lysopcac181.lysopcac281 | 0.010487431  | 0.030640912 | 0.73267305  |
| pcaac401.acetylmithoine | -0.014998161 | 0.043829869 | 0.732731996 |
| pcaac300.pcaac384       | 0.03336512   | 0.097533026 | 0.732807017 |
| pcaec364.c5             | 0.003684953  | 0.010777526 | 0.732941911 |
| pcaac362.pcaec401       | 0.021095205  | 0.061715223 | 0.733013685 |
| pcaec401.tyrosine       | 0.021792744  | 0.063758559 | 0.733024338 |
| pcaec364.pcaac425       | -0.032279786 | 0.094443148 | 0.733032159 |
| ornithine.smc261        | 0.01687552   | 0.049373982 | 0.733032853 |
| pcaec405.taurine        | -0.028123314 | 0.082284722 | 0.733039786 |
| pcaec383.lysine         | -0.031783617 | 0.09300911  | 0.733080826 |
| pcaac385.pcaac381       | 0.021162489  | 0.061935833 | 0.733112189 |
| c18.smc241              | 0.005950823  | 0.017419717 | 0.733164636 |
| c2.lysopcac140          | 0.0012156    | 0.003559403 | 0.733237065 |
| c4.histidine            | -0.023296299 | 0.068216319 | 0.733245742 |
| smohc222.pcaec321       | -0.014136247 | 0.04139964  | 0.733281826 |
| pcaac384.smc181         | -0.019573012 | 0.057334682 | 0.733339276 |

|                              |              |             |             |
|------------------------------|--------------|-------------|-------------|
| smc240.pcaac360              | -0.009890186 | 0.028972376 | 0.733351021 |
| pcaac425.pcaac380            | 0.03015268   | 0.088331961 | 0.733358283 |
| smc240.pcaac420              | -0.005655184 | 0.016570212 | 0.733411047 |
| c141oh.leucine               | -0.002790675 | 0.008177087 | 0.733415732 |
| arginine.pcaac380            | 0.023115513  | 0.067747789 | 0.733476119 |
| c12.tryptophan               | 0.001627409  | 0.004771385 | 0.733568291 |
| pcaac341.c102                | 0.015722598  | 0.046109636 | 0.733638815 |
| pcaac421.pcaac402            | 0.025033111  | 0.073425338 | 0.733676404 |
| pcaac366.lysopcac140         | -0.000663839 | 0.001947126 | 0.73367647  |
| smc161.pcaac385              | -0.005957692 | 0.01747865  | 0.733734623 |
| pcaac426.lysopcac180         | -0.018832992 | 0.055259126 | 0.733766942 |
| smc160.kynurenine            | -0.00161908  | 0.004751059 | 0.733789041 |
| h1.pcaac422                  | -0.032922788 | 0.096640831 | 0.733872655 |
| phenylalanine.pcaac364       | -0.007452033 | 0.021875826 | 0.733887773 |
| phenylalanine.pcaac384       | 0.032302589  | 0.09483584  | 0.733914561 |
| pcaac380.pcaac425            | -0.046992217 | 0.137981369 | 0.733949526 |
| methioninesulfoxide.pcaac420 | 0.038964214  | 0.114430558 | 0.733997584 |
| lysine.pcaac363              | -0.009329259 | 0.027400399 | 0.734017397 |
| methionine.pcaac384          | 0.009294779  | 0.027307    | 0.734091133 |
| c14.pcaac361                 | -0.003604588 | 0.010590312 | 0.734101848 |
| acetylmethionine.pcaac342    | 0.027287816  | 0.080200092 | 0.734191897 |
| pcaac322.pcaac362            | -0.010153586 | 0.029848874 | 0.734252186 |
| lysopcac170.pcaac380         | 0.024446212  | 0.071885436 | 0.734323276 |
| pcaac386.pcaac361            | -0.025820922 | 0.075985804 | 0.734518183 |
| c18.c162                     | 0.03446538   | 0.101450674 | 0.734583528 |
| c51dc.smc241                 | -0.006978751 | 0.020547623 | 0.73464936  |
| pcaac380.tryptophan          | -0.002224573 | 0.006550939 | 0.734692289 |
| c8.smc240                    | -0.01291596  | 0.038035904 | 0.734698242 |
| pcaac424.smc160              | -0.01212955  | 0.035728483 | 0.734758664 |
| pcaac423.prolinr             | -0.014161119 | 0.041719416 | 0.734800225 |
| pcaac383.taurine             | 0.011863532  | 0.034964358 | 0.734900605 |
| pcaac420.c162                | -0.020474698 | 0.060350437 | 0.734930764 |
| prolinr.lysopcac140          | 0.005652633  | 0.016661834 | 0.734936124 |
| pcaac443.pcaac322            | 0.021568464  | 0.063584149 | 0.734969932 |
| c162.pcaac321                | 0.005888685  | 0.017363001 | 0.735015042 |
| pcaac405.pcaac385            | -0.010845612 | 0.031979206 | 0.735019226 |
| lysopcac280.pcaac401         | -0.000823467 | 0.002428335 | 0.735047932 |
| c181.smc161                  | 0.025240801  | 0.074433205 | 0.73504855  |
| pcaac321.pcaac363            | -0.011458715 | 0.033794773 | 0.735077919 |
| pcaac362.pcaac343            | 0.011837693  | 0.034914264 | 0.735090943 |
| pcaac382.pcaac380            | 0.027216035  | 0.080280605 | 0.735120266 |
| pcaac322.pcaac386            | -0.005915317 | 0.017452448 | 0.735174544 |
| smc260.valine                | -0.021513437 | 0.06348844  | 0.735237043 |

|                                |              |             |             |
|--------------------------------|--------------|-------------|-------------|
| pcaec405.asymmetricdimethylar; | 0.01024176   | 0.030236782 | 0.735340308 |
| c5.pcaac360                    | -0.016133459 | 0.047655101 | 0.735469817 |
| c5.pcaac323                    | -0.050540624 | 0.149380924 | 0.735629555 |
| histidine.pcaec365             | -0.009807409 | 0.028988306 | 0.735637762 |
| smc180.smc181                  | 0.023550743  | 0.069622061 | 0.73568093  |
| alanine.lysopcac182            | -0.005047192 | 0.014922312 | 0.73570669  |
| c0.pcaec365                    | 0.014747683  | 0.043613079 | 0.735769161 |
| pcaec341.pcaac401              | -0.000575422 | 0.001702262 | 0.735855286 |
| pcaec340.pcaac424              | -0.008327505 | 0.024636261 | 0.735866879 |
| smc181.lysopcac170             | 0.003979119  | 0.011773088 | 0.735892337 |
| pcaec365.tryptophan            | 0.001269085  | 0.003755419 | 0.735929845 |
| pcaac281.c4                    | -0.00470704  | 0.013932511 | 0.735996559 |
| histidine.lysopcac281          | -0.002900442 | 0.008587793 | 0.73607604  |
| pcaac320.smc261                | 0.024375272  | 0.072189835 | 0.736139856 |
| arginine.smohc241              | -0.024405807 | 0.072292075 | 0.736181337 |
| c0.c5                          | -0.00742242  | 0.021988872 | 0.736216342 |
| c51dc.pcaac402                 | -0.006692114 | 0.019832778 | 0.736311478 |
| kynurenine.pcaac365            | 0.022750921  | 0.067425663 | 0.736315009 |
| pcaac365.c3                    | 0.009573183  | 0.028375873 | 0.73635393  |
| pcaac362.pcaec321              | -0.002285566 | 0.006777033 | 0.736443307 |
| pcaec301.c4                    | -0.004461269 | 0.013228792 | 0.736452593 |
| c0.lysopcac170                 | -0.008573731 | 0.025432586 | 0.73654539  |
| c18.pcaac401                   | -0.000655509 | 0.001944977 | 0.73661283  |
| pcaac404.arginine              | 0.01118437   | 0.033186827 | 0.736623333 |
| pcaec404.pcaac344              | 0.025064721  | 0.074379038 | 0.736642871 |
| c142.pcaec321                  | -0.00440271  | 0.013066269 | 0.736668426 |
| glutamicacid.pcaac343          | 0.009784893  | 0.029042826 | 0.736698375 |
| pcaec386.pcaac422              | -0.015840751 | 0.04702278  | 0.736727408 |
| smohc221.prolinr               | -0.014348688 | 0.042605214 | 0.73679626  |
| pcaec362.pcaec403              | -0.013415658 | 0.039839029 | 0.736823213 |
| lysopcac204.pcaac343           | -0.010247595 | 0.030439535 | 0.736892792 |
| c12.methionine                 | -0.016450149 | 0.048866063 | 0.736905301 |
| pcaec362.smc260                | 0.018810395  | 0.055879479 | 0.736915163 |
| smc160.smc241                  | -0.041942674 | 0.124615859 | 0.73695176  |
| pcaac424.pcaac386              | 0.004626063  | 0.01374508  | 0.736962538 |
| c141oh.tyrosine                | 0.022513769  | 0.066894026 | 0.73696454  |
| pcaec341.valine                | 0.021957391  | 0.065248942 | 0.7369958   |
| putrescine.arginine            | -0.007068369 | 0.021007055 | 0.737026803 |
| pcaec360.pcaac404              | -0.004183379 | 0.012434192 | 0.737052684 |
| pcaec381.asparticacid          | 0.032308364  | 0.096045072 | 0.73709335  |
| c51.pcaec321                   | 0.008574827  | 0.025491841 | 0.737102508 |
| lysopcac170.pcaac344           | 0.019657874  | 0.058478857 | 0.737269404 |
| pcaac406.pcaac383              | 0.003749683  | 0.01116133  | 0.737420244 |



|                                |              |             |             |
|--------------------------------|--------------|-------------|-------------|
| pcaec363.pcaac300              | -0.028566656 | 0.085032199 | 0.737421751 |
| pcaec340.c3                    | 0.009833062  | 0.029273825 | 0.737460568 |
| pcaec404.lysopcac281           | 0.006929963  | 0.020631094 | 0.737460943 |
| pcaac364.pcaac365              | -0.015911686 | 0.047372726 | 0.737473067 |
| alphaaminoadipicacid.pcaec363  | -0.005249124 | 0.015628304 | 0.737480548 |
| pcaec383.smc241                | -0.007210892 | 0.021471251 | 0.737505769 |
| pcaac425.tryptophan            | 0.005257308  | 0.015654381 | 0.737508169 |
| pcaac385.pcaec341              | 0.026449581  | 0.07877063  | 0.737550651 |
| pcaac240.pcaac420              | -0.039917728 | 0.118908439 | 0.737609606 |
| lysopcac204.pcaac320           | 0.014434737  | 0.043001416 | 0.737625318 |
| creatinine.smc180              | 0.008813696  | 0.026261841 | 0.73767954  |
| h1.isoleucine                  | 0.010198849  | 0.030393249 | 0.737713757 |
| pcaac380.pcaec401              | 0.014855365  | 0.04428383  | 0.737792758 |
| pcaec384.tryptophan            | 0.001500058  | 0.004473268 | 0.737882884 |
| alphaaminoadipicacid.c16       | 0.016263323  | 0.04850129  | 0.737898631 |
| pcaac341.asymmetricdimethylar; | 0.012523909  | 0.037352999 | 0.737922785 |
| putrescine.taurine             | 0.021916052  | 0.065373343 | 0.737953459 |
| pcaac424.lysine                | 0.03558603   | 0.106163086 | 0.737985772 |
| pcaec342.pcaac386              | 0.00637313   | 0.019013168 | 0.737990253 |
| lysopcac181.pcaac300           | -0.016747725 | 0.049970166 | 0.738021202 |
| phenylalanine.smc240           | 0.018727739  | 0.055879901 | 0.73803008  |
| glutamine.pcaac386             | 0.007658022  | 0.022854554 | 0.738079959 |
| pcaec300.pcaac401              | -0.000998199 | 0.002979028 | 0.73808075  |
| pcaec301.pcaac421              | 0.004482386  | 0.013377412 | 0.738083837 |
| pcaec424.c5                    | -0.008280276 | 0.024721953 | 0.738185518 |
| smohc222.pcaac343              | -0.00904463  | 0.027009478 | 0.738236264 |
| creatinine.c162                | 0.039958462  | 0.119326517 | 0.738237896 |
| c18.pcaac321                   | 0.010643029  | 0.031786345 | 0.73826527  |
| pcaac404.lysopcac140           | -0.000943654 | 0.002818951 | 0.738322776 |
| pcaac386.lysopcac140           | -0.000401535 | 0.001199587 | 0.738342225 |
| c102.valine                    | 0.021631531  | 0.064626709 | 0.73835197  |
| c8.smc260                      | 0.010549178  | 0.031517375 | 0.738355801 |
| pcaec402.lysopcac181           | 0.024944671  | 0.074528463 | 0.738363337 |
| pcaec321.smohc241              | 0.042369252  | 0.126596896 | 0.738379508 |
| pcaec401.c2                    | 0.022262343  | 0.066518933 | 0.738380754 |
| pcaac360.pcaac321              | 0.016004978  | 0.047832271 | 0.738433829 |
| smohc161.pcaac300              | -0.019234704 | 0.057487976 | 0.738448679 |
| serine.pcaec301                | 0.020438805  | 0.061136124 | 0.738652108 |
| smc260.histidine               | -0.016384235 | 0.049015068 | 0.738687476 |
| pcaec365.serine                | -0.040773621 | 0.122001581 | 0.738735418 |
| h1.lysopcac281                 | -0.004818839 | 0.014420109 | 0.738758538 |
| lysopcac281.pcaac401           | -0.001021627 | 0.003057385 | 0.738776908 |
| pcaac383.smc241                | -0.008511994 | 0.025473633 | 0.73877795  |

|                        |              |             |             |
|------------------------|--------------|-------------|-------------|
| serine.pcaec403        | 0.015994917  | 0.047868064 | 0.738780425 |
| pcaec363.lysopcac281   | 0.007622642  | 0.022813227 | 0.738790451 |
| pcaac421.pcaac402      | 0.024559123  | 0.073520368 | 0.738856271 |
| c4.pcaac402            | -0.038632584 | 0.115682552 | 0.738925345 |
| pcaec425.pcaec386      | 0.0017577    | 0.005263963 | 0.73895656  |
| smc202.lysopcac160     | -0.005843779 | 0.017501068 | 0.738958141 |
| spermidine.lysine      | 0.013048717  | 0.039079488 | 0.738964107 |
| lysine.phenylalanine   | 0.012576448  | 0.037666667 | 0.738974596 |
| pcaec421.lysine        | 0.031995502  | 0.09584824  | 0.739030188 |
| smc241.c181            | -0.00396401  | 0.011878717 | 0.73911097  |
| pcaec381.pcaac240      | -0.009624765 | 0.028848963 | 0.739171866 |
| pcaec363.pcaac386      | 0.005957212  | 0.017856185 | 0.739175068 |
| pcaec343.valine        | -0.018222864 | 0.054637055 | 0.739247395 |
| pcaec340.pcaec444      | 0.048942906  | 0.146753544 | 0.739263694 |
| pcaac322.pcaec321      | -0.001895738 | 0.005685153 | 0.739301274 |
| pcaec383.pcaec446      | 0.01936198   | 0.058067443 | 0.739312316 |
| pcaac383.pcaac384      | -0.030296431 | 0.090872109 | 0.739344811 |
| pcaac322.pcaec445      | 0.018243153  | 0.054725998 | 0.73937641  |
| c2.pcaac401            | -0.000736504 | 0.002209434 | 0.739383383 |
| smohc221.lysopcac203   | -0.005439582 | 0.016322051 | 0.73944312  |
| c181.pcaec364          | 0.006722307  | 0.020177999 | 0.739530119 |
| putrescine.pcaac322    | 0.015367614  | 0.046129116 | 0.739535267 |
| c101.tryptophan        | 0.004347445  | 0.013051601 | 0.739570505 |
| pcaac381.pcaec445      | -0.026166876 | 0.078595901 | 0.739696604 |
| c8.isoleucine          | 0.008782179  | 0.026380551 | 0.739715983 |
| smc161.pcaec403        | 0.013137865  | 0.039464934 | 0.739718863 |
| leucine.pcaec444       | 0.032785295  | 0.098498243 | 0.739755127 |
| methionine.pcaac300    | -0.018793426 | 0.056462216 | 0.739756612 |
| smohc241.pcaec420      | -0.005656627 | 0.016996892 | 0.739791231 |
| pcaac281.pcaac300      | 0.027185162  | 0.081690201 | 0.739806305 |
| smc161.pcaec384        | -0.036808943 | 0.110610293 | 0.739808697 |
| histidine.pcaac386     | 0.006747551  | 0.020284825 | 0.739914254 |
| pcaac403.pcaac426      | -0.040962398 | 0.123163152 | 0.739954818 |
| lysopcac140.pcaec321   | -0.004720455 | 0.014202015 | 0.740110935 |
| c0.glutamicacid        | -0.013313872 | 0.040057621 | 0.740119382 |
| methionine.lysopcac170 | -0.006461158 | 0.01944157  | 0.740142563 |
| smohc221.pcaec404      | 0.008122752  | 0.024443277 | 0.740162887 |
| pcaec421.pcaac420      | -0.058537904 | 0.17623718  | 0.740280534 |
| c141.pcaac401          | -0.000773128 | 0.002328568 | 0.740382486 |
| c5.pcaec381            | -0.034022399 | 0.102519531 | 0.740500164 |
| pcaac425.smc241        | -0.005607059 | 0.016896039 | 0.740504809 |
| isoleucine.serine      | 0.021154634  | 0.063765744 | 0.740580891 |
| pcaac404.pcaec401      | -0.009735088 | 0.029344345 | 0.740582403 |

|                               |              |             |             |
|-------------------------------|--------------|-------------|-------------|
| c12.pcaec360                  | -0.002425873 | 0.00731245  | 0.740588359 |
| c51.serotonin                 | -0.031361894 | 0.094544041 | 0.740609653 |
| asparagine.threonine          | 0.007449819  | 0.022459806 | 0.740625984 |
| lysopcac281.c3                | 0.010059573  | 0.030329089 | 0.740637239 |
| alphaaminoadipicacid.pcaec343 | -0.024458092 | 0.073741308 | 0.740642101 |
| pcaec386.lysopcac180          | 0.02580997   | 0.077823048 | 0.740660786 |
| pcaec364.lysopcac204          | -0.007997583 | 0.024115676 | 0.740672271 |
| pcaac365.lysopcac140          | -0.000581001 | 0.001752726 | 0.740785139 |
| pcaac420.tryptophan           | 0.006740166  | 0.020333388 | 0.740786452 |
| pcaec321.methionine           | -0.009545432 | 0.028796417 | 0.740788582 |
| c14.pcaac384                  | -0.026464685 | 0.079860024 | 0.740857501 |
| smohc241.c3                   | 0.007325051  | 0.02210756  | 0.740896269 |
| pcaac343.pcaec321             | -0.001825971 | 0.005511368 | 0.740916561 |
| c16.pcaac360                  | -0.015605312 | 0.047116117 | 0.740992205 |
| pcaac341.smc260               | 0.009118917  | 0.027536049 | 0.741027459 |
| lysine.smc161                 | -0.021107794 | 0.063746676 | 0.74105983  |
| c51dc.lysopcac281             | -0.007432222 | 0.022451877 | 0.741128378 |
| lysopcac170.isoleucine        | -0.011524767 | 0.034817925 | 0.741149472 |
| lysine.pcaac424               | -0.004297116 | 0.01298395  | 0.741183405 |
| smc241.pcaac426               | -0.019523527 | 0.058995835 | 0.741202516 |
| serotonin.smohc222            | -0.002294543 | 0.006934811 | 0.741245741 |
| lysopcac181.pcaec384          | 0.014213104  | 0.042960881 | 0.741272102 |
| pcaac404.smc260               | 0.008832087  | 0.026704836 | 0.741353821 |
| pcaac240.pcaec380             | 0.03140002   | 0.094971226 | 0.741431607 |
| pcaec425.lysine               | 0.038898646  | 0.117671348 | 0.741474135 |
| pcaec421.pcaec301             | 0.030654004  | 0.092744372 | 0.741510915 |
| smc161.pcaec342               | -0.04774206  | 0.144466449 | 0.741548483 |
| c102.tryptophan               | -0.003154465 | 0.009546931 | 0.74158993  |
| pcaec421.c162                 | -0.031456319 | 0.095235838 | 0.741678475 |
| c14.pcaac360                  | -0.010317037 | 0.031249426 | 0.741790006 |
| pcaac320.pcaac401             | -0.000683827 | 0.002071649 | 0.741837599 |
| pcaec424.glycine              | 0.005871715  | 0.017793334 | 0.741907628 |
| pcaac321.pcaac422             | 0.028988396  | 0.087850024 | 0.741922153 |
| c141oh.lysopcac140            | 0.000805657  | 0.002441921 | 0.741958553 |
| lysopcac140.smc241            | -0.007743494 | 0.023471506 | 0.741971584 |
| pcaec343.asparticacid         | -0.012205691 | 0.037002197 | 0.742006601 |
| pcaec363.pcaac404             | -0.001593188 | 0.004831134 | 0.742073605 |
| pcaec322.ornithine            | 0.009251279  | 0.028055482 | 0.742092966 |
| lysopcac180.alanine           | 0.018094252  | 0.054875785 | 0.742106782 |
| lysopcac182.methionine        | 0.011564225  | 0.035074581 | 0.74212731  |
| pcaac424.smc261               | -0.0278116   | 0.084378452 | 0.74220149  |
| smc260.c4                     | 0.00937901   | 0.028461469 | 0.742255701 |
| smc261.pcaac343               | 0.006578051  | 0.019963332 | 0.742276003 |

|                              |              |             |             |
|------------------------------|--------------|-------------|-------------|
| pcaac401.pcaec403            | 0.015597287  | 0.047337208 | 0.742286176 |
| glycine.pcaac341             | 0.002054764  | 0.006236708 | 0.742309022 |
| c2.pcaec341                  | 0.017282257  | 0.052459779 | 0.742327608 |
| pcaec382.pcaec405            | -0.062910362 | 0.190974943 | 0.742343737 |
| histidine.pcaec321           | -0.00449027  | 0.013632954 | 0.742379965 |
| pcaac361.c162                | -0.026440829 | 0.080278488 | 0.742383721 |
| pcaec446.threonine           | -0.005286    | 0.016049305 | 0.742386537 |
| lysopcac281.smohc241         | 0.024745124  | 0.07514101  | 0.742419902 |
| pcaec361.pcaac323            | -0.03335205  | 0.101277784 | 0.742422341 |
| c14.c16                      | -0.016679093 | 0.050655791 | 0.742459512 |
| pcaac341.pcaec402            | -0.016416836 | 0.049860359 | 0.742464817 |
| pcaac300.pcaec385            | 0.017343543  | 0.05268751  | 0.742524219 |
| c181.pcaac401                | -0.00065403  | 0.001986944 | 0.742534348 |
| pcaac240.lysopcac160         | 0.011511617  | 0.034993553 | 0.742685287 |
| pcaec405.c3                  | -0.010119873 | 0.030767261 | 0.74272074  |
| c181.smc181                  | 0.01028502   | 0.031275716 | 0.742771198 |
| serine.c51                   | 0.017757393  | 0.054005191 | 0.74280214  |
| c162.threonine               | 0.010976225  | 0.033392264 | 0.742880111 |
| pcaec340.pcaac401            | -0.000765643 | 0.002330395 | 0.743000308 |
| pcaec420.threonine           | 0.004845536  | 0.014749158 | 0.743012847 |
| pcaec443.prolinr             | -0.008209792 | 0.024997853 | 0.743095647 |
| pcaec422.glycine             | 0.008237701  | 0.025087253 | 0.743139312 |
| asparticacid.pcaac386        | 0.007971278  | 0.024278617 | 0.743167195 |
| c16.pcaac380                 | 0.024068886  | 0.073313524 | 0.743185508 |
| c51dc.lysopcac161            | 0.024619509  | 0.074995545 | 0.743201458 |
| smohc222.lysopcac160         | -0.010955095 | 0.033380857 | 0.743272879 |
| pcaac344.c141oh              | -0.025905655 | 0.078961166 | 0.743351327 |
| c0.pcaec401                  | -0.013248756 | 0.040387953 | 0.743384244 |
| pcaac341.methioninesulfoxide | 0.00725921   | 0.0221309   | 0.743403049 |
| c16.pcaec342                 | -0.024089103 | 0.07344419  | 0.743418484 |
| pcaec362.pcaac425            | 0.021883621  | 0.066771627 | 0.743609828 |
| leucine.c102                 | 0.00535853   | 0.01635431  | 0.743674628 |
| pcaac281.tyrosine            | -0.016538039 | 0.05048112  | 0.743707863 |
| pcaac281.pcaac386            | 0.00529468   | 0.016166979 | 0.743789912 |
| citruline.tryptophan         | 0.001757811  | 0.005368559 | 0.743844716 |
| c2.pcaac404                  | 0.000791659  | 0.002419067 | 0.743972225 |
| pcaec364.pcaac402            | -0.009410054 | 0.028755147 | 0.743980097 |
| smc161.pcaec383              | -0.029404362 | 0.089865814 | 0.744013786 |
| c141oh.glycine               | 0.012742793  | 0.038946244 | 0.744024129 |
| lysopcac204.pcaec341         | 0.014738239  | 0.045051418 | 0.744059334 |
| smohc141.lysopcac204         | -0.009037587 | 0.02762796  | 0.744078371 |
| pcaac364.pcaec342            | 0.042697945  | 0.130534591 | 0.744091037 |
| pcaec425.arginine            | -0.010951065 | 0.033502681 | 0.744264094 |

|                                |              |             |             |
|--------------------------------|--------------|-------------|-------------|
| pcaec340.pcaec343              | 0.025741848  | 0.078760474 | 0.744289885 |
| pcaac323.pcaac401              | -0.001013697 | 0.003101602 | 0.744295121 |
| pcaec300.pcaac385              | -0.018839724 | 0.057646253 | 0.744305752 |
| asparticacid.pcaac421          | -0.01772676  | 0.054249325 | 0.744344614 |
| smc161.pcaac424                | 0.006279583  | 0.019221393 | 0.744395177 |
| smc241.threonine               | 0.012233281  | 0.037450761 | 0.744431318 |
| pcaec401.c14                   | -0.023384932 | 0.071600664 | 0.744467228 |
| smc261.c18                     | 0.010821073  | 0.033162144 | 0.744689262 |
| smc202.pcaac322                | -0.013700166 | 0.041986491 | 0.744695775 |
| pcaec385.arginine              | 0.018244395  | 0.055938929 | 0.744809709 |
| pcaec301.creatinine            | 0.00392888   | 0.012046369 | 0.744811248 |
| creatinine.lysopcac180         | -0.020732684 | 0.063571002 | 0.744820397 |
| lysopcac181.arginine           | 0.024231578  | 0.074300336 | 0.744823546 |
| smc181.lysopcac140             | 0.000493429  | 0.001513073 | 0.744838184 |
| pcaec380.pcaec341              | -0.007976642 | 0.024472537 | 0.744965137 |
| asparagine.tryptophan          | 0.002487891  | 0.007634062 | 0.745002179 |
| pcaec405.smohc161              | -0.006204418 | 0.019041997 | 0.74505157  |
| h1.glycine                     | -0.011543879 | 0.035430557 | 0.745059909 |
| pcaec386.smc261                | -0.024847618 | 0.076267888 | 0.745077329 |
| pcaec405.pcaec382              | -0.029630962 | 0.090968172 | 0.745126456 |
| h1.methionine                  | -0.004417591 | 0.013562775 | 0.745137422 |
| c3.glutamicacid                | -0.011030394 | 0.033869733 | 0.745170089 |
| asparticacid.smc260            | -0.014133359 | 0.043413221 | 0.745258312 |
| smohc241.c2                    | -0.01805404  | 0.055490676 | 0.745410519 |
| pcaac364.methioninesulfoxide   | 0.004787877  | 0.01471638  | 0.745417514 |
| c3.lysopcac160                 | 0.003625569  | 0.01114401  | 0.74542164  |
| pcaec406.pcaec403              | 0.006386178  | 0.019633128 | 0.745468705 |
| pcaec383.serotonin             | -0.039880261 | 0.122609866 | 0.745479416 |
| c102.pcaec341                  | -0.023205189 | 0.07135834  | 0.74553156  |
| leucine.spermidine             | 0.0234022    | 0.071974211 | 0.745565823 |
| pcaec322.pcaac323              | 0.02174319   | 0.066878895 | 0.745591598 |
| glutamine.pcaac380             | -0.023798267 | 0.073222956 | 0.745668529 |
| pcaac341.pcaac343              | -0.021342015 | 0.065669064 | 0.745681795 |
| smc241.c18                     | 0.0098623    | 0.030346718 | 0.745686377 |
| smc241.pcaac343                | 0.008094744  | 0.024915616 | 0.745762668 |
| smc260.lysopcac160             | 0.0105562    | 0.03250265  | 0.745843235 |
| pcaac406.lysopcac180           | 0.021440249  | 0.066016767 | 0.745850724 |
| pcaac365.phenylalanine         | -0.009606578 | 0.029583645 | 0.745883802 |
| glycine.smohc161               | 0.004701667  | 0.014480385 | 0.745909375 |
| pcaac384.smc180                | -0.016678355 | 0.051376234 | 0.745954987 |
| pcaec384.pcaac386              | 0.005502163  | 0.016951052 | 0.745985533 |
| pcaec382.asymmetricdimethylarq | -0.007315648 | 0.022542586 | 0.746035087 |
| pcaac360.c4                    | -0.004959896 | 0.015284771 | 0.746055046 |

|                                |              |             |             |
|--------------------------------|--------------|-------------|-------------|
| methioninesulfoxide.pcaec403   | -0.03074393  | 0.094747694 | 0.746067986 |
| c101.pcaac383                  | -0.001374886 | 0.004238013 | 0.746116649 |
| c51dc.pcaac386                 | -0.005504941 | 0.016969516 | 0.746128676 |
| pcaec322.lysine                | -0.029108753 | 0.089742133 | 0.746160258 |
| methioninesulfoxide.arginine   | -0.016910067 | 0.052135558 | 0.746169229 |
| smc161.pcaac404                | -0.001205978 | 0.003719073 | 0.746229433 |
| pcaac360.taurine               | 0.018200742  | 0.056146526 | 0.746307468 |
| pcaac402.pcaac445              | -0.028491731 | 0.087895675 | 0.746315844 |
| c142.pcaac360                  | 0.008222281  | 0.025366519 | 0.746327072 |
| pcaac405.pcaac401              | -0.00907107  | 0.027985971 | 0.746334555 |
| asymmetricdimethylarginine.pca | 0.000406129  | 0.001253019 | 0.74634089  |
| pcaac320.c51dc                 | -0.041354179 | 0.127620009 | 0.746400802 |
| pcaac421.pcaac365              | -0.013221715 | 0.040809356 | 0.746441713 |
| pcaac322.arginine              | -0.010315411 | 0.031852064 | 0.746542606 |
| lysopcac203.ornithine          | 0.016020592  | 0.049470059 | 0.746549842 |
| methionine.glutamicacid        | -0.013320205 | 0.041143259 | 0.746619638 |
| histidine.c51dc                | 0.039784165  | 0.122888085 | 0.746626256 |
| pcaec384.pcaac300              | -0.022082129 | 0.06822236  | 0.746674831 |
| pcaac240.pcaac343              | 0.008936658  | 0.027610115 | 0.746678938 |
| smohc222.smohc141              | -0.052011411 | 0.160693203 | 0.746682198 |
| pcaec445.c8                    | -0.012697713 | 0.039242646 | 0.746757592 |
| pcaec421.smc241                | -0.00535097  | 0.01653866  | 0.746777311 |
| pcaac406.pcaac341              | -0.016889261 | 0.052216013 | 0.746847799 |
| pcaec361.asymmetricdimethylar; | 0.011277798  | 0.034869814 | 0.74686594  |
| pcaac425.lysopcac140           | -0.000417965 | 0.001292464 | 0.746896087 |
| c51dc.pcaec321                 | 0.005458511  | 0.016880253 | 0.74691064  |
| c162.serine                    | 0.015510924  | 0.047978329 | 0.746968406 |
| c182.c4                        | 0.005458703  | 0.016885929 | 0.746984182 |
| isoleucine.pcaac321            | 0.012776569  | 0.039525764 | 0.747001359 |
| c101.asparticacid              | 0.012124798  | 0.037510591 | 0.747008879 |
| pcaac425.c102                  | 0.011732928  | 0.036299048 | 0.747014182 |
| citruline.smc261               | 0.010967959  | 0.03393957  | 0.747065749 |
| pcaac404.c16                   | 0.010558887  | 0.032681408 | 0.747123141 |
| pcaec383.c2                    | 0.031918802  | 0.098810417 | 0.747164471 |
| c8.pcaec383                    | -0.014148333 | 0.043812922 | 0.7472436   |
| acetylmithoine.c5              | 0.005042331  | 0.015614551 | 0.747244257 |
| smohc141.pcaac321              | -0.006579763 | 0.02037561  | 0.747245507 |
| kynurenine.ornithine           | 0.01056816   | 0.032727598 | 0.747253597 |
| ornithine.smohc222             | -0.001667595 | 0.005164759 | 0.747278674 |
| pcaec421.pcaac343              | 0.0316043    | 0.097886226 | 0.747287689 |
| glycine.valine                 | 0.021083791  | 0.065309906 | 0.747318557 |
| pcaac361.pcaac300              | -0.035558594 | 0.110148315 | 0.747320193 |
| pcaec422.smc261                | -0.016961425 | 0.052541099 | 0.747322184 |

|                           |              |             |             |
|---------------------------|--------------|-------------|-------------|
| lysine.lysopcac280        | 0.004155033  | 0.012874966 | 0.747397888 |
| lysopcac160.pcaec321      | -0.011843782 | 0.036706775 | 0.747445196 |
| lysopcac203.pcaec445      | -0.023435741 | 0.072638849 | 0.747464519 |
| c14.pcaac380              | -0.016222223 | 0.05028731  | 0.747496954 |
| pcaec381.c8               | 0.014523393  | 0.045025141 | 0.747518819 |
| creatinine.tryptophan     | 0.00122991   | 0.003813155 | 0.747532373 |
| alphaaminoadipicacid.c102 | 0.007047585  | 0.021855303 | 0.747591515 |
| pcaec322.phenylalanine    | 0.007648718  | 0.023722837 | 0.747626002 |
| prolinr.pcaec363          | -0.009625864 | 0.029855864 | 0.747632704 |
| smohc161.pcaac380         | 0.01989644   | 0.061751637 | 0.747791554 |
| leucine.pcaac360          | 0.008029961  | 0.024924028 | 0.747809329 |
| smc161.smc260             | 0.011220706  | 0.034831134 | 0.747833253 |
| pcaac425.pcaac402         | -0.020976576 | 0.065127985 | 0.747881236 |
| c12.pcaec321              | 0.013825226  | 0.042929753 | 0.747911012 |
| pcaac405.pcaec384         | -0.015802153 | 0.049090919 | 0.748022392 |
| pcaec321.c4               | -0.003906696 | 0.012137058 | 0.748033025 |
| pcaec405.pcaac426         | -0.033063172 | 0.102731987 | 0.74806512  |
| glutamicacid.asparticacid | -0.036504402 | 0.113425207 | 0.7480669   |
| pcaec365.pcaac425         | -0.027857032 | 0.086561497 | 0.748081226 |
| pcaac420.pcaec404         | -0.004178156 | 0.012990018 | 0.748212928 |
| lysopcac203.pcaec443      | -0.028763734 | 0.089432514 | 0.748226976 |
| c51.lysopcac161           | 0.020067621  | 0.062407947 | 0.748279505 |
| pcaec402.isoleucine       | 0.009960766  | 0.030980459 | 0.748308122 |
| smohc161.isoleucine       | 0.008205233  | 0.02552426  | 0.748345694 |
| c14.pcaac320              | -0.019309604 | 0.060067004 | 0.748345887 |
| pcaac321.smc181           | -0.005321723 | 0.016559581 | 0.748421118 |
| spermidine.ornithine      | 0.060510967  | 0.188324957 | 0.748464044 |
| pcaec364.c3               | -0.006587377 | 0.020501587 | 0.748464697 |
| pcaec362.pcaec321         | -0.00293043  | 0.009126311 | 0.748626292 |
| pcaec424.pcaac380         | 0.0222169    | 0.069193542 | 0.748636464 |
| pcaac420.lysopcac170      | 0.019088859  | 0.059452437 | 0.748640695 |
| smohc222.pcaec365         | 0.014833665  | 0.046200208 | 0.748643935 |
| pcaac344.pcaac424         | -0.003647541 | 0.011362153 | 0.748680236 |
| c51.lysopcac182           | -0.005652922 | 0.01761693  | 0.748790224 |
| pcaac360.pcaac401         | -0.001118796 | 0.003486724 | 0.748795428 |
| smc261.pcaac426           | 0.015962886  | 0.049748917 | 0.748798597 |
| pcaac341.pcaec384         | 0.013088676  | 0.040791492 | 0.74879953  |
| c4.pcaac360               | 0.011605155  | 0.036174901 | 0.74884563  |
| serine.putrescine         | 0.007247211  | 0.022595712 | 0.748900753 |
| c141.smohc161             | 0.003586818  | 0.011183514 | 0.7489085   |
| c142.pcaec422             | 0.008265555  | 0.025774864 | 0.748939438 |
| prolinr.c2                | 0.020969414  | 0.065459437 | 0.749197077 |
| lysopcac203.smohc222      | 0.008311478  | 0.0259514   | 0.749250936 |

|                                |              |             |             |
|--------------------------------|--------------|-------------|-------------|
| pcaac240.spermidine            | 0.023237765  | 0.072560907 | 0.749265338 |
| c101.pcaac361                  | -0.015520593 | 0.048479944 | 0.74934645  |
| pcaec340.pcaec384              | -0.036569102 | 0.114230626 | 0.749354514 |
| pcaec424.pcaec386              | 0.002339739  | 0.007312813 | 0.749493162 |
| prolinr.pcaec365               | -0.006503387 | 0.02033036  | 0.749542468 |
| serotonin.histidine            | 0.024048602  | 0.075181634 | 0.749551633 |
| c51dc.pcaac281                 | 0.000812281  | 0.002539765 | 0.749587964 |
| pcaac360.tryptophan            | 0.002410959  | 0.007541922 | 0.749702137 |
| serine.pcaec322                | 0.014110891  | 0.044144236 | 0.749717401 |
| pcaec362.tryptophan            | 0.000936345  | 0.002929299 | 0.749721933 |
| smohc222.lysopcac161           | -0.0264286   | 0.082682286 | 0.749727849 |
| c16.valine                     | -0.0247127   | 0.077327152 | 0.749768773 |
| c181.pcaac386                  | -0.005486468 | 0.01717464  | 0.7498706   |
| asymmetricdimethylarginine.c51 | 0.027598945  | 0.086395646 | 0.749873165 |
| lysopcac180.pcaec384           | -0.015816845 | 0.049528782 | 0.74995017  |
| pcaac422.lysopcac140           | -0.000410906 | 0.001286806 | 0.749968377 |
| glutamicacid.pcaac300          | -0.028273687 | 0.088560884 | 0.750017872 |
| pcaec382.putrescine            | -0.024081827 | 0.075449761 | 0.750078455 |
| pcaec322.c3                    | -0.013257214 | 0.041536216 | 0.750081931 |
| pcaac424.taurine               | 0.023437829  | 0.073442913 | 0.750114085 |
| c181.pcaac426                  | 0.021652962  | 0.067850784 | 0.750116891 |
| pcaec420.pcaac344              | 0.020072488  | 0.062898935 | 0.750119404 |
| methioninesulfoxide.serotonin  | 0.050817758  | 0.159244254 | 0.750122846 |
| smohc161.pcaec422              | 0.008740739  | 0.027393223 | 0.750148803 |
| pcaec420.pcaac421              | -0.003599908 | 0.011282106 | 0.750150913 |
| c181.c51dc                     | 0.035031172  | 0.109829661 | 0.7502433   |
| pcaec301.methionine            | -0.010593592 | 0.033221564 | 0.750305451 |
| lysopcac280.lysopcac160        | -0.007380612 | 0.023149696 | 0.750347715 |
| pcaec446.glycine               | 0.021866956  | 0.068590261 | 0.750359507 |
| pcaec402.c182                  | 0.01239349   | 0.038875907 | 0.750366615 |
| lysopcac160.pcaac421           | -0.004855731 | 0.015232084 | 0.750376517 |
| pcaec403.pcaec385              | 0.026454701  | 0.082998351 | 0.750410867 |
| pcaac321.pcaec405              | 0.023400448  | 0.073425379 | 0.750441646 |
| c141oh.isoleucine              | 0.003164767  | 0.009930696 | 0.750450461 |
| c16.methionine                 | -0.004714071 | 0.014793032 | 0.750463328 |
| pcaec364.pcaac323              | -0.030046691 | 0.094290436 | 0.750468834 |
| pcaac421.pcaac344              | -0.012095531 | 0.037958167 | 0.750474005 |
| prolinr.smc180                 | 0.008184826  | 0.025687137 | 0.75048841  |
| pcaac364.tryptophan            | 0.001638151  | 0.005142558 | 0.750554413 |
| lysopcac140.pcaec341           | 0.022394567  | 0.070302518 | 0.750556121 |
| asparagine.pcaec401            | 0.006890685  | 0.02163355  | 0.750576743 |
| prolinr.pcaec420               | -0.009132906 | 0.028675967 | 0.750601015 |
| pcaac366.smc161                | -0.026050613 | 0.081797692 | 0.75060879  |



|                              |              |             |             |
|------------------------------|--------------|-------------|-------------|
| pcaec403.pcaac343            | 0.005528957  | 0.017368091 | 0.750711868 |
| phenylalanine.pcaac385       | 0.010106556  | 0.031753717 | 0.750757636 |
| pcaac322.pcaac421            | 0.006461462  | 0.020310665 | 0.750869634 |
| acetylmethionine.pcaec301    | 0.018305871  | 0.057548342 | 0.750896827 |
| c51dc.arginine               | 0.016015903  | 0.050369434 | 0.750992841 |
| pcaec322.pcaec364            | -0.015050217 | 0.04733375  | 0.750999785 |
| c18.c182                     | -0.022640312 | 0.071207746 | 0.751009014 |
| lysopcac182.smc240           | -0.02081154  | 0.065496061 | 0.751156447 |
| c182.pcaec443                | -0.026164066 | 0.082353745 | 0.751193642 |
| pcaac364.smc261              | -0.020887194 | 0.065750205 | 0.751215174 |
| methioninesulfoxide.pcaec380 | 0.038817367  | 0.122224346 | 0.751278646 |
| serine.pcaac401              | -0.010021284 | 0.031555392 | 0.751288915 |
| c182.pcaac321                | -0.009943976 | 0.031317436 | 0.751330933 |
| glutamine.pcaac425           | -0.026772385 | 0.084350009 | 0.751426087 |
| pcaec421.pcaec340            | -0.021742972 | 0.068510655 | 0.751448849 |
| smc260.smc160                | -0.027541305 | 0.086800626 | 0.751503685 |
| pcaec422.methionine          | -0.021265805 | 0.067033092 | 0.751541897 |
| pcaec382.pcaac420            | 0.043278435  | 0.136493997 | 0.751671591 |
| smc181.c0                    | 0.000907481  | 0.002862526 | 0.751710251 |
| pcaec406.pcaec384            | -0.011433338 | 0.036089145 | 0.751871362 |
| asparagine.acetylmethionine  | 0.009082087  | 0.028668552 | 0.751880519 |
| pcaec384.pcaac384            | 0.018169752  | 0.057358421 | 0.751896023 |
| smohc221.pcaac424            | -0.002888583 | 0.009118718 | 0.751896427 |
| lysopcac170.c8               | -0.016860035 | 0.053227317 | 0.751911443 |
| c0.pcaec362                  | -0.011111556 | 0.035080188 | 0.751917483 |
| arginine.smc261              | 0.011164209  | 0.035250972 | 0.751948462 |
| c10.lysopcac280              | 0.003417702  | 0.010794293 | 0.752012951 |
| pcaac363.c18                 | -0.011064766 | 0.034947368 | 0.75201974  |
| pcaec322.pcaac421            | -0.013210519 | 0.041732742 | 0.752066545 |
| pcaac380.pcaec403            | 0.008792313  | 0.027776841 | 0.752079063 |
| serotonin.pcaac384           | -0.01786958  | 0.056470039 | 0.752147501 |
| pcaec364.tryptophan          | 0.000958043  | 0.003027979 | 0.752182903 |
| pcaec445.transhydroxyproline | 0.013508791  | 0.042711064 | 0.752268959 |
| pcaec343.pcaac321            | 0.010638206  | 0.03363677  | 0.75228108  |
| serine.acetylmethionine      | 0.026919845  | 0.085125598 | 0.752304094 |
| c51dc.pcaac425               | -0.030888027 | 0.097794155 | 0.752599025 |
| pcaec405.pcaec385            | 0.026532276  | 0.084015882 | 0.752634361 |
| lysopcac140.c4               | -0.007524882 | 0.023830867 | 0.752663682 |
| c162.pcaec386                | 0.004219691  | 0.013365232 | 0.75269437  |
| pcaac342.pcaec383            | -0.020187545 | 0.06396221  | 0.752773708 |
| pcaac364.pcaac363            | -0.002981257 | 0.009445817 | 0.752773817 |
| pcaac300.smc181              | -0.006123205 | 0.019401782 | 0.7527863   |
| h1.pcaac321                  | -0.011931575 | 0.037808563 | 0.752802565 |

|                                |              |             |             |
|--------------------------------|--------------|-------------|-------------|
| pcaec423.pcaac401              | -0.001288478 | 0.004083517 | 0.752838333 |
| lysopcac160.pcaec402           | -0.007779592 | 0.024658865 | 0.752870743 |
| lysopcac281.smc261             | -0.018001002 | 0.057060225 | 0.752882046 |
| pcaec443.lysopcac180           | -0.024031946 | 0.076183577 | 0.752901644 |
| pcaec403.isoleucine            | 0.004408711  | 0.013978893 | 0.752950488 |
| pcaac341.pcaac402              | -0.00774747  | 0.024565466 | 0.752952637 |
| citruline.smohc241             | -0.012217493 | 0.038752458 | 0.753036268 |
| pcaac360.pcaec386              | -0.00483603  | 0.015347326 | 0.753160864 |
| c12.ornithine                  | -0.013169032 | 0.041796732 | 0.753185436 |
| pcaac364.pcaac384              | -0.029651468 | 0.094116634 | 0.753202863 |
| c141.pcaec341                  | 0.018666609  | 0.059264308 | 0.753261996 |
| lysopcac180.smc161             | 0.024530685  | 0.077887716 | 0.753279296 |
| smohc221.lysopcac280           | -0.004919373 | 0.0156197   | 0.753281285 |
| lysopcac181.pcaac380           | 0.017186192  | 0.054578226 | 0.75332351  |
| prolinr.pcaec321               | 0.008366384  | 0.026573304 | 0.753360874 |
| c3.serine                      | -0.021874401 | 0.069520896 | 0.753509908 |
| lysopcac181.pcaac360           | 0.015484967  | 0.049229932 | 0.753586616 |
| pcaac424.c162                  | -0.022613481 | 0.071915447 | 0.753661145 |
| pcaec321.pcaac420              | 0.032071714  | 0.102002271 | 0.753679192 |
| pcaac422.leucine               | -0.010294126 | 0.032745838 | 0.75372252  |
| pcaec383.lysopcac180           | -0.025837922 | 0.082200783 | 0.753750893 |
| lysopcac170.methioninesulfoxid | 0.021456804  | 0.068277949 | 0.753804112 |
| leucine.pcaac422               | 0.014034893  | 0.044666726 | 0.75383678  |
| pcaac323.pcaec321              | -0.004588606 | 0.014608925 | 0.753925839 |
| pcaac425.pcaec363              | -0.011086528 | 0.0353042   | 0.753977007 |
| pcaec383.isoleucine            | 0.005287002  | 0.016837674 | 0.753999882 |
| pcaac361.methioninesulfoxide   | 0.008560542  | 0.027269339 | 0.754055105 |
| pcaac421.threonine             | -0.010419085 | 0.033193299 | 0.754081116 |
| pcaac365.pcaac404              | -0.003102826 | 0.009885401 | 0.754089901 |
| putrescine.tryptophan          | 0.000753208  | 0.002399904 | 0.754113069 |
| smc202.smc161                  | 0.034873007  | 0.111138303 | 0.754165192 |
| pcaac366.c4                    | -0.005622619 | 0.017919757 | 0.754175654 |
| kynurenine.taurine             | -0.018094411 | 0.057683484 | 0.754237835 |
| pcaec422.prolinr               | -0.010009911 | 0.031911586 | 0.754243935 |
| pcaac323.pcaac424              | 0.003122302  | 0.009955851 | 0.754290611 |
| pcaac421.pcaec423              | -0.025834152 | 0.08237897  | 0.754300843 |
| pcaac341.pcaac401              | -0.000546236 | 0.001741903 | 0.754312647 |
| c18.smc240                     | -0.015603149 | 0.049762457 | 0.754337734 |
| pcaac405.c102                  | 0.010400525  | 0.033173967 | 0.754366509 |
| c16.lysopcac140                | 0.00029782   | 0.000949966 | 0.754372948 |
| pcaac385.pcaac383              | 0.001333223  | 0.004252833 | 0.754384778 |
| isoleucine.pcaec384            | 0.00996748   | 0.031801436 | 0.754431742 |
| pcaec381.pcaac402              | -0.01682904  | 0.053711231 | 0.754510712 |

|                                |              |             |             |
|--------------------------------|--------------|-------------|-------------|
| smc160.smohc161                | 0.028005237  | 0.089393174 | 0.754543169 |
| acetylmethionine.tryptophan    | 0.000776027  | 0.002477192 | 0.754552742 |
| pcaac406.pcaac386              | -0.005124664 | 0.016364718 | 0.754640517 |
| asparticacid.pcaac446          | -0.024095726 | 0.076973222 | 0.754726038 |
| pcaac300.pcaac300              | -0.034145942 | 0.109079551 | 0.754728546 |
| pcaac421.c3                    | -0.01602008  | 0.051218208 | 0.754922712 |
| creatinine.pcaac386            | 0.007272289  | 0.023252081 | 0.75493963  |
| pcaac366.c5                    | 0.005288261  | 0.016909493 | 0.754954374 |
| c162.pcaac422                  | 0.007891679  | 0.025239426 | 0.755004799 |
| c2.c18                         | -0.023085027 | 0.073848566 | 0.755060256 |
| c162.lysopcac140               | 0.00045119   | 0.001443808 | 0.755135845 |
| methionine.pcaac340            | 0.023483926  | 0.075162895 | 0.755180902 |
| c141oh.pcaac321                | -0.006349256 | 0.020331763 | 0.755300539 |
| pcaac404.leucine               | 0.002750502  | 0.008810319 | 0.755370047 |
| methionine.tryptophan          | -0.00244299  | 0.007826601 | 0.755409208 |
| pcaac380.c4                    | -0.00448433  | 0.014368402 | 0.755441592 |
| pcaac362.c51dc                 | 0.044413433  | 0.142333512 | 0.755486211 |
| smc202.pcaac445                | -0.010433988 | 0.033445902 | 0.755540559 |
| pcaac425.arginine              | 0.01158298   | 0.037129016 | 0.755540854 |
| pcaac420.pcaac425              | 0.035899868  | 0.115085535 | 0.755559793 |
| acetylmethionine.serotonin     | 0.019271858  | 0.061784931 | 0.755576733 |
| pcaac360.isoleucine            | 0.005610159  | 0.017989416 | 0.755621888 |
| putrescine.pcaac344            | 0.024746585  | 0.079359381 | 0.755644269 |
| leucine.pcaac363               | -0.012253591 | 0.039297673 | 0.755655416 |
| glutamine.c142                 | -0.01794022  | 0.057535195 | 0.755656694 |
| pcaac385.tryptophan            | 0.000990115  | 0.00317585  | 0.755694117 |
| asymmetricdimethylarginine.pca | 0.026393784  | 0.084662865 | 0.755703237 |
| pcaac421.smc241                | -0.003911731 | 0.012547902 | 0.755709164 |
| pcaac321.creatinine            | -0.004359797 | 0.013986553 | 0.755732178 |
| c141.pcaac321                  | -0.005008377 | 0.016069535 | 0.755765843 |
| c14.pcaac401                   | -0.000940249 | 0.003017213 | 0.755796753 |
| glycine.transhydroxyproline    | -0.008447809 | 0.027112066 | 0.755826911 |
| pcaac402.c51dc                 | 0.054217422  | 0.174073434 | 0.755922177 |
| alphaaminoadipicacid.c18       | -0.015800343 | 0.050759766 | 0.756063279 |
| prolinr.pcaac364               | 0.015500033  | 0.049795307 | 0.756064741 |
| smc161.pcaac344                | 0.020386481  | 0.065494599 | 0.756068774 |
| pcaac365.smc240                | -0.009208219 | 0.029587515 | 0.756106614 |
| pcaac422.taurine               | -0.019623531 | 0.06308479  | 0.756223286 |
| pcaac366.c51dc                 | 0.046064734  | 0.148091976 | 0.756231677 |
| c182.pcaac422                  | 0.007096604  | 0.022815996 | 0.756245766 |
| lysopcac161.acetylmethionine   | 0.013857271  | 0.044562637 | 0.756302405 |
| smohc141.smc181                | -0.017411674 | 0.055995409 | 0.756312584 |
| pcaac401.pcaac384              | -0.011114677 | 0.035746783 | 0.756327907 |

|                              |              |             |             |
|------------------------------|--------------|-------------|-------------|
| pcaac424.lysopcac160         | 0.022226483  | 0.071528096 | 0.75647223  |
| smohc161.pcaec364            | 0.011602582  | 0.037340242 | 0.756481226 |
| pcaec343.pcaec382            | -0.003797802 | 0.012222559 | 0.756485211 |
| pcaec382.c4                  | -0.008355892 | 0.026892907 | 0.756493414 |
| isoleucine.smohc161          | -0.005650997 | 0.018189871 | 0.75652575  |
| pcaac383.pcaac344            | -0.022454545 | 0.072294636 | 0.756578545 |
| smc240.c0                    | 0.0001915    | 0.000616644 | 0.756613304 |
| pcaec380.c51                 | 0.052773246  | 0.169937435 | 0.756618381 |
| pcaec343.c102                | 0.007647784  | 0.024627016 | 0.756618884 |
| c5.smc241                    | -0.012975149 | 0.041809001 | 0.756771419 |
| glutamicacid.c51dc           | 0.055864306  | 0.180156794 | 0.756965886 |
| pcaac383.lysopcac140         | 0.000590679  | 0.001905367 | 0.757025986 |
| smohc222.arginine            | 0.017970871  | 0.058003499 | 0.757165632 |
| pcaec381.methioninesulfoxide | 0.008213341  | 0.026517303 | 0.757232987 |
| c51dc.pcaac380               | -0.019279796 | 0.062246431 | 0.757234351 |
| c102.pcaec382                | -0.006485928 | 0.02094057  | 0.757236691 |
| pcaec444.c162                | 0.022222961  | 0.071753137 | 0.757248942 |
| c4.putrescine                | -0.024653578 | 0.079625205 | 0.757320165 |
| acetylornithoine.c142        | 0.034538445  | 0.111648735 | 0.757525911 |
| pcaec381.smc160              | -0.022993214 | 0.074389967 | 0.757722435 |
| methionine.pcaac386          | 0.006718845  | 0.021746791 | 0.757822835 |
| lysopcac181.pcaac363         | -0.005375535 | 0.017401777 | 0.757861342 |
| creatinine.pcaec401          | -0.016815291 | 0.054448091 | 0.757918768 |
| pcaec342.pcaac300            | -0.031114455 | 0.100755255 | 0.757933476 |
| pcaac404.tryptophan          | -0.001555697 | 0.005037907 | 0.757943987 |
| pcaac385.pcaec360            | -0.001526214 | 0.004942691 | 0.757956482 |
| pcaec364.c101                | -0.002785897 | 0.009024853 | 0.758025028 |
| c101.pcaac401                | -0.000897094 | 0.002907596 | 0.758144258 |
| pcaec342.pcaac404            | -0.001646049 | 0.005336715 | 0.758217119 |
| c0.c51dc                     | -0.040767997 | 0.132191681 | 0.758245941 |
| lysopcac203.alanine          | 0.018440479  | 0.059800776 | 0.758272826 |
| glutamicacid.pcaec386        | 0.004011648  | 0.013009876 | 0.758281282 |
| smohc141.pcaec444            | -0.040377506 | 0.130960453 | 0.758308434 |
| pcaec364.pcaec380            | 0.016823462  | 0.05456644  | 0.758313589 |
| kynurenine.lysopcac161       | -0.021029651 | 0.068215897 | 0.758336919 |
| c2.c16                       | 0.024804585  | 0.080480778 | 0.758394396 |
| serine.pcaac384              | 0.0223761    | 0.072603416 | 0.758401108 |
| c51dc.pcaec384               | 0.009755799  | 0.031660158 | 0.758442914 |
| c51.smc180                   | 0.002728764  | 0.008859141 | 0.758537338 |
| pcaec421.c142                | 0.011498365  | 0.037341123 | 0.758605027 |
| isoleucine.pcaac364          | 0.011053636  | 0.035908263 | 0.758679283 |
| pcaac424.c8                  | 0.016776174  | 0.054502511 | 0.758697784 |
| pcaec363.pcaec424            | 0.015118457  | 0.049118582 | 0.758705721 |

|                                |              |             |             |
|--------------------------------|--------------|-------------|-------------|
| smc180.pcaac420                | -0.019929486 | 0.064783315 | 0.758828783 |
| pcaac320.pcaac321              | -0.012152547 | 0.039504753 | 0.75883684  |
| pcaac342.pcaac281              | 0.00104323   | 0.0033929   | 0.758949287 |
| pcaac301.pcaac385              | 0.017167229  | 0.055833144 | 0.758949672 |
| kynurenine.pcaec342            | 0.032182161  | 0.104675199 | 0.758969413 |
| pcaec386.pcaec301              | -0.028746052 | 0.093511972 | 0.759001891 |
| pcaec445.c101                  | -0.004447558 | 0.014473072 | 0.759082548 |
| c16.lysopcac160                | 0.009522139  | 0.030990768 | 0.759114111 |
| smc160.pcaec403                | -0.008741159 | 0.028455218 | 0.759165203 |
| lysopcac181.lysopcac160        | -0.006501739 | 0.021171323 | 0.759232624 |
| pcaac421.c8                    | -0.014178279 | 0.046170869 | 0.759246636 |
| pcaec384.lysopcac140           | 0.000385267  | 0.001254969 | 0.759314934 |
| pcaac403.pcaec360              | -0.001538924 | 0.005013514 | 0.759343533 |
| c181.smc260                    | 0.008194458  | 0.026697161 | 0.759354195 |
| pcaec420.tryptophan            | 0.002791436  | 0.009095175 | 0.759374881 |
| pcaec340.c14                   | -0.013951048 | 0.045465836 | 0.759425844 |
| acetylmithoine.pcaec384        | 0.01203697   | 0.03923059  | 0.759441569 |
| pcaec385.pcaac404              | -0.004733983 | 0.015429172 | 0.759445989 |
| pcaac365.taurine               | -0.006365217 | 0.020745765 | 0.759446166 |
| lysopcac181.pcaac364           | -0.017417138 | 0.056780716 | 0.759504039 |
| glycine.smc241                 | -0.003853541 | 0.012564862 | 0.759543527 |
| smohc222.c5                    | -0.001579882 | 0.005151984 | 0.759571544 |
| pcaec386.creatinine            | 0.007302108  | 0.023814636 | 0.759596097 |
| pcaec444.glycine               | 0.006303787  | 0.020559348 | 0.759602606 |
| c101.pcaac402                  | 0.00374815   | 0.012229519 | 0.759701602 |
| lysopcac204.pcaec445           | 0.018386287  | 0.06002452  | 0.759831413 |
| pcaac401.pcaac344              | -0.023546394 | 0.076876188 | 0.759848967 |
| pcaec364.pcaec406              | 0.021021948  | 0.068634555 | 0.759850271 |
| pcaac381.prolinr               | -0.009906323 | 0.032351762 | 0.759912183 |
| glutamicacid.c141oh            | 0.039106114  | 0.12771284  | 0.759914578 |
| citruiline.valine              | 0.028002262  | 0.091459685 | 0.759939576 |
| pcaec343.tryptophan            | 0.000692957  | 0.002264793 | 0.760092557 |
| asymmetricdimethylarginine.pca | -0.01565471  | 0.051180662 | 0.760166722 |
| pcaac323.creatinine            | -0.002149053 | 0.007027602 | 0.760219738 |
| pcaac342.tryptophan            | 0.000664211  | 0.002172972 | 0.76032048  |
| c182.pcaec384                  | 0.003045568  | 0.009966674 | 0.760391925 |
| pcaec423.c51dc                 | 0.041976745  | 0.137376172 | 0.760403015 |
| pcaac380.c51dc                 | -0.039603245 | 0.12968356  | 0.760537436 |
| lysopcac180.tryptophan         | -0.000202959 | 0.000665077 | 0.760702362 |
| c142.pcaac420                  | 0.034707079  | 0.113745757 | 0.760731325 |
| pcaec364.lysopcac161           | 0.035923899  | 0.117743713 | 0.760751142 |
| pcaac321.pcaec420              | 0.02236803   | 0.073327405 | 0.76079615  |
| pcaac366.taurine               | -0.009688535 | 0.031765729 | 0.760829307 |

|                                 |              |             |             |
|---------------------------------|--------------|-------------|-------------|
| pcaec341.pcaec446               | -0.01623449  | 0.05324671  | 0.76091119  |
| isoleucine.methioninesulfoxide  | 0.007193356  | 0.023596127 | 0.760940543 |
| asymmetricdimethylarginine.smc  | 0.00818233   | 0.026843549 | 0.760969256 |
| methioninesulfoxide.pcaac405    | 0.049124756  | 0.161165629 | 0.760974085 |
| spermidine.lysopcac281          | -0.017570903 | 0.057679113 | 0.761108722 |
| pcaec423.lysopcac160            | -0.013866258 | 0.045524013 | 0.761138989 |
| pcaac422.pcaac405               | -0.022986259 | 0.075466359 | 0.761141038 |
| pcaac343.valine                 | 0.014397426  | 0.04727534  | 0.76117553  |
| pcaec300.c4                     | -0.003250677 | 0.010674421 | 0.761186531 |
| pcaac323.asymmetricdimethylar;  | -0.009813222 | 0.032228582 | 0.761218025 |
| pcaac365.pcaec360               | 0.001856627  | 0.006098    | 0.761235666 |
| pcaec386.tryptophan             | 0.000792108  | 0.002602589 | 0.761320199 |
| asymmetricdimethylarginine.pca  | 0.01947512   | 0.064002307 | 0.76137036  |
| pcaac381.pcaec361               | 0.009821875  | 0.032279343 | 0.761378236 |
| pcaec406.smohc161               | -0.005416212 | 0.0178083   | 0.761482866 |
| pcaec381.isoleucine             | 0.006501017  | 0.021379804 | 0.761533772 |
| pcaec364.pcaac281               | 0.000608244  | 0.002001622 | 0.761683593 |
| pcaac362.lysine                 | 0.017895308  | 0.058896897 | 0.761709798 |
| pcaec425.c142                   | 0.016753494  | 0.055141401 | 0.761719998 |
| c181.pcaec405                   | -0.015415904 | 0.050761736 | 0.761823731 |
| leucine.pcaac380                | -0.025998751 | 0.085627918 | 0.761874457 |
| pcaac384.tryptophan             | -0.002999098 | 0.009883061 | 0.762000866 |
| pcaac386.pcaac425               | -0.035749947 | 0.117812066 | 0.762008086 |
| pcaec343.pcaec444               | 0.035683779  | 0.11761332  | 0.762045965 |
| pcaac402.smohc141               | 0.010178011  | 0.033567077 | 0.762186665 |
| pcaac425.pcaec444               | -0.034269432 | 0.113023701 | 0.762193038 |
| citruline.pcaac362              | -0.014041882 | 0.046321045 | 0.762241026 |
| pcaec422.c102                   | -0.009494177 | 0.031320248 | 0.762248916 |
| pcaec405.pcaec446               | 0.0201481    | 0.066466676 | 0.762249965 |
| pcaec342.lysine                 | 0.019943654  | 0.065805605 | 0.762296825 |
| alphaaminoadipicacid.lysopcac14 | -0.000342897 | 0.001131504 | 0.762315111 |
| serine.pcaec406                 | -0.022662436 | 0.07479606  | 0.762357293 |
| alphaaminoadipicacid.pcaac386   | -0.007317629 | 0.024156018 | 0.762401227 |
| pcaec342.tryptophan             | 0.000523996  | 0.001729992 | 0.762433436 |
| smohc222.asparagine             | -0.005828072 | 0.019242711 | 0.762447052 |
| pcaec365.c141                   | -0.012055678 | 0.039806017 | 0.762455408 |
| glutamicacid.acetylnithoine     | -0.014493166 | 0.047856098 | 0.762464384 |
| pcaec402.glycine                | 0.006567652  | 0.021687565 | 0.762478499 |
| pcaac323.pcaec363               | -0.008464635 | 0.027963241 | 0.762573218 |
| ornithine.c101                  | -0.003791375 | 0.012526429 | 0.762600404 |
| pcaac420.smohc222               | -0.001340514 | 0.004432595 | 0.762789019 |
| pcaec380.pcaac401               | -0.001507873 | 0.004986618 | 0.762817987 |
| lysopcac182.ornithine           | 0.007785651  | 0.025748009 | 0.762821933 |

|                               |              |             |             |
|-------------------------------|--------------|-------------|-------------|
| pcaac361.pcaec403             | 0.021356966  | 0.070667816 | 0.762945507 |
| glutamine.c182                | -0.019668484 | 0.065088583 | 0.762972926 |
| pcaac420.valine               | 0.024357052  | 0.080611762 | 0.762993972 |
| pcaac385.pcaac365             | -0.015459378 | 0.051180321 | 0.76306662  |
| lysopcac170.smc241            | -0.007666013 | 0.025384277 | 0.7631112   |
| c51.smohc241                  | 0.013070058  | 0.04328405  | 0.76314035  |
| pcaec405.pcaec360             | -0.001340123 | 0.004438276 | 0.763150551 |
| pcaec445.tryptophan           | 0.000827848  | 0.002742359 | 0.763205487 |
| smohc222.pcaec402             | 0.017175159  | 0.056906841 | 0.763253163 |
| ornithine.pcaec421            | 0.000446124  | 0.001478223 | 0.763264137 |
| arginine.pcaec406             | -0.005419214 | 0.017960139 | 0.763311156 |
| ornithine.h1                  | -0.000793239 | 0.002630825 | 0.763477397 |
| pcaac344.pcaac343             | -0.010833355 | 0.035933646 | 0.763503947 |
| pcaac366.valine               | 0.016565249  | 0.054960421 | 0.763564021 |
| pcaec406.pcaac401             | -0.002187253 | 0.007259033 | 0.763631467 |
| c14.pcaac383                  | 0.001572174  | 0.005218169 | 0.763651434 |
| smc202.pcaac343               | 0.008338521  | 0.027677152 | 0.763659201 |
| c3.methionine                 | -0.010378499 | 0.034459226 | 0.763732337 |
| serotonin.pcaac322            | -0.021414938 | 0.071119572 | 0.76378581  |
| pcaac405.acetylnithoine       | 0.006624557  | 0.022001125 | 0.763794129 |
| pcaac281.lysopcac281          | 0.010970678  | 0.036454874 | 0.763917568 |
| pcaec382.c162                 | -0.039349888 | 0.130828641 | 0.764042606 |
| pcaac362.pcaac343             | 0.010632705  | 0.035360152 | 0.764101116 |
| c101.pcaec382                 | 0.00741352   | 0.024659151 | 0.764144987 |
| pcaec363.tryptophan           | 0.000627348  | 0.002087213 | 0.764200176 |
| smc160.lysopcac170            | -0.00363789  | 0.012105521 | 0.764239955 |
| smohc221.pcaac426             | 0.009182395  | 0.030562169 | 0.764289595 |
| pcaec422.smc260               | 0.009679167  | 0.032226302 | 0.764365554 |
| pcaec381.pcaec445             | -0.023551228 | 0.07845598  | 0.76449184  |
| spermidine.lysopcac140        | -0.002346021 | 0.007815945 | 0.764511387 |
| pcaac420.pcaac421             | -0.029458675 | 0.098151963 | 0.764530388 |
| pcaec421.c51dc                | -0.050637136 | 0.168778078 | 0.764615123 |
| alphaaminoadipicacid.pcaec384 | 0.011227439  | 0.037424053 | 0.764627338 |
| c2.c142                       | 0.020571125  | 0.068581085 | 0.764667386 |
| lysopcac161.tryptophan        | -0.000281551 | 0.00093873  | 0.764686653 |
| pcaac420.pcaac360             | 0.014442945  | 0.048158153 | 0.764703004 |
| c142.pcaac343                 | -0.008412835 | 0.028057078 | 0.764748199 |
| pcaac343.lysopcac281          | 0.006157209  | 0.020538666 | 0.764794579 |
| c182.pcaac343                 | -0.007389726 | 0.02465453  | 0.76483665  |
| pcaac361.pcaac403             | -0.00214817  | 0.007168293 | 0.764877945 |
| pcaac403.pcaec363             | 0.012442228  | 0.041519232 | 0.764880138 |
| pcaac425.smc260               | 0.011004958  | 0.036729638 | 0.764920629 |
| pcaec322.taurine              | -0.011225146 | 0.037466654 | 0.76493358  |

|                              |              |             |             |
|------------------------------|--------------|-------------|-------------|
| pcaec422.arginine            | 0.020729564  | 0.06920708  | 0.764989997 |
| lysopcac160.tryptophan       | -0.000223916 | 0.000747579 | 0.764996394 |
| smc202.lysopcac170           | -0.003655426 | 0.012205004 | 0.765010774 |
| c8.pcaec420                  | -0.006920214 | 0.023107625 | 0.765029576 |
| putrescine.pcaec343          | -0.018072522 | 0.06037363  | 0.765130744 |
| pcaec446.tryptophan          | 0.001032815  | 0.003450986 | 0.765179076 |
| pcaac240.smohc241            | 0.024280717  | 0.081146315 | 0.765224533 |
| pcaec362.valine              | -0.017106158 | 0.057169173 | 0.765225662 |
| pcaac380.tryptophan          | 0.000637483  | 0.002130496 | 0.765226992 |
| lysine.pcaac323              | 0.031988433  | 0.10692824  | 0.765272872 |
| pcaec360.c8                  | -0.018346489 | 0.061349398 | 0.765355658 |
| alanine.pcaac300             | 0.028775855  | 0.096238032 | 0.765387725 |
| isoleucine.pcaac424          | -0.004420437 | 0.014798418 | 0.765613845 |
| lysopcac204.c16              | 0.01580524   | 0.05292211  | 0.765658884 |
| asparagine.pcaac420          | 0.02551131   | 0.085427003 | 0.765672675 |
| pcaac360.pcaec343            | 0.029423947  | 0.098554096 | 0.76573097  |
| smohc241.pcaec341            | 0.023275652  | 0.077978942 | 0.765784222 |
| pcaec386.c182                | -0.010846468 | 0.036365602 | 0.765955277 |
| smc240.pcaec422              | -0.013388457 | 0.044909574 | 0.766062976 |
| lysopcac182.pcaec385         | -0.012491257 | 0.041904159 | 0.766085233 |
| c142.pcaac341                | -0.001773833 | 0.005950798 | 0.766091188 |
| glutamicacid.pcaac381        | 0.007138883  | 0.023954498 | 0.76614055  |
| pcaac300.pcaac425            | 0.032373778  | 0.108630627 | 0.766141642 |
| pcaec342.lysopcac203         | -0.00735877  | 0.02470432  | 0.766250714 |
| pcaac361.pcaac401            | -0.000724426 | 0.002433099 | 0.766354247 |
| pcaac404.smc261              | -0.013460269 | 0.04523095  | 0.766467052 |
| c141.smc241                  | -0.009406915 | 0.031611642 | 0.766476385 |
| pcaac385.valine              | 0.019588485  | 0.065858674 | 0.766587154 |
| histidine.pcaec342           | 0.02649322   | 0.089081984 | 0.766609591 |
| c51dc.pcaac404               | 0.004017879  | 0.013511143 | 0.766630529 |
| smohc161.pcaac420            | -0.02294472  | 0.077204146 | 0.766767446 |
| serotonin.pcaac281           | -0.000653049 | 0.002197585 | 0.766789323 |
| pcaac403.methioninesulfoxide | 0.013340807  | 0.044905928 | 0.766852788 |
| pcaec381.pcaac386            | 0.006153887  | 0.020717223 | 0.766884269 |
| c16.pcaec444                 | 0.031898739  | 0.107403525 | 0.766917105 |
| pcaec362.pcaec420            | -0.006695148 | 0.022543063 | 0.766921121 |
| c3.tryptophan                | 0.000430476  | 0.001449477 | 0.766926331 |
| pcaac365.c14                 | 0.026430655  | 0.089012833 | 0.766969029 |
| serine.c162                  | -0.025784255 | 0.086853196 | 0.767014092 |
| lysopcac161.lysopcac281      | 0.003847002  | 0.012959649 | 0.767034742 |
| pcaac404.alanine             | 0.007880464  | 0.026548049 | 0.767039915 |
| pcaec301.transhydroxyproline | 0.009932517  | 0.033465233 | 0.767067892 |
| pcaec402.pcaac364            | -0.01835132  | 0.061833639 | 0.767079842 |



|                                     |              |             |             |
|-------------------------------------|--------------|-------------|-------------|
| pcaac240.leucine                    | -0.003916331 | 0.013198184 | 0.767120102 |
| alphaaminoadipicacid.smc260         | -0.006555282 | 0.022093363 | 0.767138669 |
| pcaec443.c162                       | -0.020930026 | 0.070542868 | 0.767145364 |
| smc261.pcaac383                     | 0.001503228  | 0.00506657  | 0.767148441 |
| lysopcac281.pcaac361                | 0.016400754  | 0.055278531 | 0.767150211 |
| pcaac420.c4                         | -0.004329992 | 0.014605001 | 0.767317645 |
| lysopcac181.tryptophan              | -0.000164016 | 0.000553369 | 0.767377301 |
| pcaac426.pcaac424                   | -0.004787767 | 0.016158153 | 0.767444656 |
| pcaac426.lysopcac160                | -0.023310815 | 0.078680985 | 0.767472541 |
| lysopcac180.taurine                 | 0.00911791   | 0.030784516 | 0.767537344 |
| c8.transhydroxyproline              | -0.012259032 | 0.041391062 | 0.767544297 |
| acetylmethionine.leucine            | -0.007154783 | 0.024157255 | 0.767544666 |
| pcaec405.pcaec444                   | -0.031796355 | 0.107389053 | 0.767613036 |
| pcaac403.asymmetricdimethylarginine | -0.008076193 | 0.027279214 | 0.767635101 |
| smohc141.pcaec446                   | -0.008390359 | 0.028343333 | 0.767658585 |
| pcaec362.pcaac361                   | -0.010407777 | 0.03517049  | 0.76773653  |
| c12.c102                            | -0.01300972  | 0.043972665 | 0.767785538 |
| pcaec360.lysopcac160                | -0.009324851 | 0.031526906 | 0.767850223 |
| pcaec382.methionine                 | -0.009328439 | 0.03153921  | 0.767851477 |
| lysine.pcaac425                     | -0.031961439 | 0.108074552 | 0.767880157 |
| c181.c141                           | -0.013571738 | 0.045922394 | 0.768031619 |
| c51.pcaec342                        | 0.023706397  | 0.080265049 | 0.768172577 |
| kynurenine.tryptophan               | 0.000855517  | 0.002897022 | 0.768204819 |
| lysopcac170.acetylmethionine        | -0.013167466 | 0.044601352 | 0.768268396 |
| pcaec380.pcaac424                   | -0.007376359 | 0.024987787 | 0.768289105 |
| glutamicacid.pcaac380               | 0.025059925  | 0.084912367 | 0.768343709 |
| pcaac420.pcaec446                   | 0.036637116  | 0.12414026  | 0.76834381  |
| pcaac422.tryptophan                 | -0.00065777  | 0.002228867 | 0.768353533 |
| c102.lysopcac281                    | 0.00434599   | 0.014728573 | 0.768385556 |
| pcaec360.tryptophan                 | 0.000574687  | 0.001947806 | 0.768407355 |
| pcaac320.lysine                     | -0.024064717 | 0.081568826 | 0.768422573 |
| pcaac322.lysopcac170                | -0.003614682 | 0.012253135 | 0.768440026 |
| lysopcac182.tryptophan              | -0.00033195  | 0.001125321 | 0.768453746 |
| pcaec423.lysopcac281                | 0.002778607  | 0.009422364 | 0.768520559 |
| pcaac421.c4                         | -0.004560664 | 0.015466956 | 0.768543349 |
| c141.c102                           | 0.012832091  | 0.043518975 | 0.768545672 |
| pcaac406.pcaec384                   | -0.008440794 | 0.028627927 | 0.768558812 |
| c51.taurine                         | -0.009991926 | 0.03389453  | 0.768597007 |
| c141oh.pcaac341                     | 0.002116638  | 0.007184183 | 0.768726524 |
| c0.pcaac341                         | -0.001135064 | 0.00385449  | 0.768838082 |
| methionine.c142                     | 0.01138645   | 0.038673007 | 0.768875859 |
| glutamicacid.lysopcac140            | -0.000558855 | 0.001898383 | 0.768909584 |
| pcaac360.pcaec420                   | -0.008418683 | 0.028605776 | 0.768974018 |

|                                |              |             |             |
|--------------------------------|--------------|-------------|-------------|
| pcaac385.smc260                | -0.009381017 | 0.031876747 | 0.768981516 |
| pcaac406.pcaec403              | 0.011142849  | 0.037874441 | 0.769046568 |
| glycine.lysopcac281            | -0.002888745 | 0.009819127 | 0.769053622 |
| lysine.pcaec420                | -0.016888868 | 0.057407311 | 0.769055181 |
| h1.pcaac365                    | 0.01682739   | 0.05720215  | 0.769070125 |
| lysopcac181.pcaac386           | -0.00998234  | 0.033940089 | 0.769114022 |
| pcaac342.pcaac320              | -0.024038757 | 0.081733954 | 0.769119129 |
| c4.transhydroxyproline         | 0.012605223  | 0.042860095 | 0.769125376 |
| pcaac361.pcaec364              | 0.007884288  | 0.02681418  | 0.769176722 |
| pcaac386.pcaac380              | 0.022459995  | 0.076404456 | 0.769231949 |
| pcaac366.pcaec321              | -0.005468321 | 0.018607393 | 0.769295175 |
| pcaec422.pcaec321              | -0.015995931 | 0.054436915 | 0.769322226 |
| c5.tryptophan                  | 0.003671234  | 0.012495306 | 0.769348472 |
| lysopcac203.tryptophan         | -0.000224106 | 0.000762849 | 0.769375016 |
| c12.pcaac383                   | -0.001575777 | 0.005365718 | 0.769450772 |
| citruline.pcaec380             | 0.012261036  | 0.041752318 | 0.769461199 |
| pcaac405.pcaac401              | -0.001008163 | 0.003434089 | 0.76952685  |
| pcaac363.c162                  | 0.021613688  | 0.073641506 | 0.769585119 |
| smc161.smc261                  | -0.022518855 | 0.076728562 | 0.76959386  |
| c18.smc180                     | 0.004666728  | 0.015904477 | 0.769643402 |
| c0.transhydroxyproline         | -0.00991812  | 0.033804579 | 0.769663638 |
| pcaac402.pcaac386              | 0.00546198   | 0.018621453 | 0.769724055 |
| pcaac323.pcaac322              | -0.015909735 | 0.054241254 | 0.769725777 |
| pcaac360.pcaec404              | 0.005011593  | 0.017089403 | 0.769769189 |
| pcaec384.lysopcac182           | -0.013790627 | 0.047028983 | 0.76978489  |
| citruline.pcaac321             | -0.00863546  | 0.029451794 | 0.769807914 |
| pcaac401.smohc221              | 0.037579628  | 0.128196424 | 0.769857939 |
| smohc141.smc261                | 0.011899759  | 0.04059813  | 0.769880805 |
| methionine.pcaec420            | 0.012706075  | 0.043360962 | 0.769942392 |
| asymmetricdimethylarginine.pca | -0.003219445 | 0.010986999 | 0.769947813 |
| pcaec300.smc161                | -0.027850188 | 0.095052327 | 0.769966632 |
| lysopcac160.pcaec420           | -0.014848181 | 0.050678164 | 0.769973327 |
| smohc161.lysopcac140           | 0.000231745  | 0.000791012 | 0.769985945 |
| pcaac363.c0                    | -0.001709361 | 0.005835168 | 0.770010342 |
| pcaec361.c3                    | 0.011588294  | 0.039558702 | 0.770011867 |
| pcaac401.tryptophan            | -0.001017181 | 0.003473031 | 0.770057112 |
| c141oh.pcaac401                | -0.000926374 | 0.003163603 | 0.770101001 |
| pcaec386.smc260                | 0.013375902  | 0.04569775  | 0.770191476 |
| alanine.c18                    | -0.017355534 | 0.059309163 | 0.770249083 |
| serotonin.c10                  | 0.006409448  | 0.021904137 | 0.770260242 |
| alanine.smc161                 | 0.032122164  | 0.10980656  | 0.770320863 |
| c141.pcaac300                  | 0.009797482  | 0.033491881 | 0.770321673 |
| c4.phenylalanine               | -0.007018414 | 0.023999256 | 0.770390373 |

|                                |              |             |             |
|--------------------------------|--------------|-------------|-------------|
| c10.kynurenine                 | 0.002354655  | 0.008054107 | 0.77045778  |
| isoleucine.tryptophan          | -0.000253565 | 0.000867354 | 0.770466525 |
| smc181.pcaec364                | -0.010617633 | 0.036322823 | 0.770489541 |
| pcaec361.pcaec382              | 0.005792119  | 0.019820018 | 0.770548438 |
| pcaec443.lysopcac203           | 0.005003751  | 0.017123809 | 0.770567986 |
| serine.pcaac380                | 0.017912941  | 0.061328664 | 0.770666487 |
| lysopcac180.pcaac364           | -0.015978766 | 0.054731924 | 0.770769535 |
| pcaac363.pcaac384              | 0.032312836  | 0.11070114  | 0.77081033  |
| pcaac420.methionine            | -0.010013609 | 0.034307542 | 0.770821585 |
| kynurenine.smc160              | 0.022983589  | 0.078754934 | 0.770852844 |
| pcaec446.c51dc                 | -0.035989199 | 0.12331967  | 0.770852967 |
| pcaac403.pcaec301              | -0.025263501 | 0.086588448 | 0.770907439 |
| lysopcac170.tryptophan         | -0.000226326 | 0.000775712 | 0.770907757 |
| pcaac322.smohc241              | 0.011366186  | 0.03895677  | 0.770908346 |
| lysopcac180.pcaec365           | 0.008725462  | 0.029906106 | 0.770909999 |
| pcaac281.pcaac323              | -0.029632718 | 0.101576468 | 0.770935727 |
| pcaec444.smohc222              | 0.003114171  | 0.010675101 | 0.770939813 |
| pcaec322.tryptophan            | 0.000681256  | 0.002335826 | 0.770991444 |
| pcaec365.creatinine            | 0.007446158  | 0.025530774 | 0.770992174 |
| pcaec385.pcaac420              | 0.01559869   | 0.053486364 | 0.771004052 |
| pcaec406.pcaac384              | 0.013610956  | 0.046684573 | 0.771070567 |
| lysopcac161.c102               | 0.010717785  | 0.036765545 | 0.771096797 |
| arginine.pcaac421              | 0.004648038  | 0.015944544 | 0.771100109 |
| pcaec403.c3                    | -0.015769395 | 0.054145251 | 0.771306396 |
| acetylmethionine.pcaac343      | 0.006189679  | 0.021261675 | 0.771400534 |
| c162.c141                      | -0.011312415 | 0.038859733 | 0.771408284 |
| c12.spermidine                 | -0.020116679 | 0.069110741 | 0.77143119  |
| pcaec444.tryptophan            | 0.000750168  | 0.002577841 | 0.771486644 |
| pcaec384.pcaac363              | -0.002051442 | 0.00705079  | 0.771528021 |
| asymmetricdimethylarginine.pca | 0.014242217  | 0.048956001 | 0.771553442 |
| c5.pcaec386                    | 0.004593164  | 0.015792293 | 0.771607092 |
| pcaec402.lysine                | -0.027822311 | 0.09569498  | 0.771690226 |
| pcaac384.pcaec365              | 0.010308315  | 0.035468616 | 0.771772271 |
| pcaec422.pcaac380              | 0.019860533  | 0.06836748  | 0.771875486 |
| ornithine.c18                  | -0.019272163 | 0.066342873 | 0.771878111 |
| c181.pcaac380                  | 0.018915944  | 0.06512859  | 0.771918873 |
| arginine.glutamicacid          | 0.015806958  | 0.054432888 | 0.77195431  |
| c3.pcaec402                    | -0.017519936 | 0.060334747 | 0.771965486 |
| smc260.tryptophan              | 0.000782834  | 0.002696748 | 0.772034846 |
| pcaac384.lysopcac204           | -0.004759131 | 0.016394945 | 0.772040662 |
| pcaac341.c14                   | 0.024094348  | 0.083041497 | 0.772141504 |
| pcaec421.tryptophan            | -0.000417066 | 0.001437725 | 0.772187727 |
| c5.pcaac321                    | -0.018684563 | 0.064447558 | 0.772316641 |

|                                |              |             |             |
|--------------------------------|--------------|-------------|-------------|
| c141oh.smc241                  | 0.00582451   | 0.020094384 | 0.772363396 |
| pcaac384.histidine             | -0.015955852 | 0.055057852 | 0.772406193 |
| pcaac380.pcaac401              | -0.001263704 | 0.00436137  | 0.772446075 |
| c16.pcaac420                   | 0.047410961  | 0.16363926  | 0.772461961 |
| pcaec424.pcaec321              | 0.0084696    | 0.029242024 | 0.772531101 |
| phenylalanine.tryptophan       | -0.000140424 | 0.000484942 | 0.772584746 |
| smc202.threonine               | -0.009924566 | 0.034274991 | 0.772592869 |
| pcaec420.lysopcac140           | -0.000262742 | 0.000907556 | 0.772632412 |
| pcaac322.lysopcac160           | 0.005363464  | 0.018531963 | 0.772699864 |
| pcaac386.pcaec362              | -0.005239694 | 0.018104397 | 0.772700945 |
| pcaec406.tryptophan            | 0.000599437  | 0.002071502 | 0.772733212 |
| smohc141.pcaec403              | -0.008811359 | 0.030455056 | 0.772771304 |
| c2.tryptophan                  | 0.00031886   | 0.001102271 | 0.77280784  |
| smc181.c18                     | -0.008996505 | 0.031104795 | 0.772841005 |
| pcaac422.lysopcac170           | 0.008646107  | 0.029896531 | 0.772864732 |
| pcaac403.tryptophan            | -0.000407557 | 0.001409274 | 0.772868345 |
| methioninesulfoxide.tryptophan | -0.000218085 | 0.000754112 | 0.772870256 |
| pcaac424.tryptophan            | -0.000519803 | 0.001798028 | 0.772944991 |
| pcaec380.prolinr               | 0.01186065   | 0.041045003 | 0.773043463 |
| prolinr.tryptophan             | -0.000573209 | 0.001983831 | 0.773063885 |
| smohc161.pcaec444              | -0.034451926 | 0.119247398 | 0.773085929 |
| alanine.pcaac384               | -0.015271179 | 0.05287042  | 0.773139164 |
| pcaec424.tryptophan            | -0.000447176 | 0.001548174 | 0.773139494 |
| lysine.asparagine              | 0.004308146  | 0.014920706 | 0.773219764 |
| pcaac403.h1                    | 0.001380619  | 0.004783189 | 0.773293216 |
| pcaec384.pcaec341              | 0.020922677  | 0.072488577 | 0.773297634 |
| pcaac381.pcaac344              | 0.02795152   | 0.096846705 | 0.77331139  |
| pcaec383.pcaac320              | 0.029616291  | 0.102626629 | 0.77333675  |
| pcaec382.isoleucine            | 0.006318737  | 0.021896623 | 0.773345614 |
| c12.pcaac363                   | 0.003397015  | 0.011774104 | 0.773387994 |
| leucine.tryptophan             | -0.000262194 | 0.000908785 | 0.773392381 |
| isoleucine.pcaec424            | 0.006503519  | 0.022542393 | 0.773398748 |
| smc240.pcaec361                | 0.004035535  | 0.013988793 | 0.773412745 |
| lysopcac204.tryptophan         | -0.000139032 | 0.000482008 | 0.773442633 |
| pcaac421.c51dc                 | -0.040242142 | 0.139514633 | 0.773442936 |
| lysopcac161.pcaac321           | 0.009940122  | 0.034468301 | 0.773488312 |
| pcaac342.pcaec321              | -0.001845671 | 0.006400932 | 0.773519173 |
| c8.pcaac421                    | 0.013462537  | 0.04669069  | 0.773526471 |
| pcaec443.pcaec321              | 0.01035728   | 0.035929576 | 0.77357869  |
| lysopcac180.pcaac421           | -0.00197995  | 0.006868884 | 0.773591698 |
| pcaec300.pcaec402              | 0.009051019  | 0.03140522  | 0.773628351 |
| histidine.asparagine           | -0.008903618 | 0.030895516 | 0.773640825 |
| pcaac381.pcaec420              | 0.014934729  | 0.051829337 | 0.773665843 |

|                                |              |             |             |
|--------------------------------|--------------|-------------|-------------|
| pcaac342.lysine                | -0.017564829 | 0.060974173 | 0.773728518 |
| smc241.smohc222                | 0.001670915  | 0.005800404 | 0.773729404 |
| smohc141.pcaec340              | 0.032509562  | 0.112884276 | 0.773789474 |
| smohc161.tryptophan            | 0.000704604  | 0.002446687 | 0.77379515  |
| pcaec404.tryptophan            | -0.000292193 | 0.001015011 | 0.773879736 |
| pcaec420.smc161                | -0.031682942 | 0.110073662 | 0.773908776 |
| putrescine.pcaec446            | 0.02418403   | 0.084026599 | 0.77392407  |
| pcaec446.methioninesulfoxide   | 0.004982279  | 0.017311426 | 0.773932514 |
| lysopcac180.smohc161           | 0.006663724  | 0.02315568  | 0.773950598 |
| arginine.pcaac384              | 0.01333177   | 0.04634058  | 0.774017981 |
| pcaac401.pcaec383              | -0.046710107 | 0.162378737 | 0.774040569 |
| isoleucine.pcaac322            | 0.016984909  | 0.059048288 | 0.774053618 |
| lysopcac161.lysopcac203        | 0.010463518  | 0.03638306  | 0.774092787 |
| c14.valine                     | 0.020318375  | 0.070682752 | 0.774195444 |
| smohc221.tryptophan            | 0.000745028  | 0.002591902 | 0.774206349 |
| glutamicacid.h1                | 0.001829682  | 0.006365642 | 0.774216809 |
| pcaac380.lysopcac281           | 0.003137212  | 0.010915182 | 0.774227115 |
| pcaec403.tryptophan            | -0.000283772 | 0.000987583 | 0.774286284 |
| pcaac383.pcaec404              | -0.011771962 | 0.04097298  | 0.774308799 |
| c5.pcaec360                    | 0.002469108  | 0.008597163 | 0.774392864 |
| asymmetricdimethylarginine.pca | -0.002913147 | 0.010144091 | 0.774410885 |
| pcaec363.lysine                | 0.021746411  | 0.075726752 | 0.774416456 |
| c0.tryptophan                  | -0.000868875 | 0.003025967 | 0.774439153 |
| c3.pcaec322                    | -0.023688842 | 0.082503251 | 0.774449542 |
| c101.isoleucine                | -0.007463466 | 0.025996344 | 0.774472008 |
| pcaac364.pcaac343              | -0.006494329 | 0.022621132 | 0.774476209 |
| pcaec420.smc261                | 0.012828626  | 0.044701132 | 0.77455617  |
| pcaec361.pcaec446              | -0.012132806 | 0.042280819 | 0.774578264 |
| c142.pcaec446                  | -0.01193661  | 0.041598496 | 0.774585577 |
| smc180.c141                    | 0.013059787  | 0.045547261 | 0.774751891 |
| c4.pcaac425                    | 0.031241598  | 0.108972248 | 0.774780396 |
| pcaac383.lysopcac281           | -0.002993104 | 0.010442037 | 0.774821141 |
| pcaac343.c18                   | 0.01337416   | 0.046663323 | 0.774844194 |
| prolinr.smc241                 | -0.002161103 | 0.0075414   | 0.774878126 |
| pcaec406.c5                    | -0.002604244 | 0.00908789  | 0.774880572 |
| pcaac323.c4                    | -0.003284056 | 0.011462519 | 0.774925025 |
| pcaac402.tryptophan            | -0.000395803 | 0.00138209  | 0.775019887 |
| prolinr.c141oh                 | -0.047061482 | 0.164352818 | 0.775047038 |
| pcaac361.pcaac385              | -0.005724715 | 0.019997939 | 0.775107415 |
| c0.pcaac364                    | -0.008155616 | 0.028494818 | 0.775146564 |
| pcaac366.c3                    | 0.008298463  | 0.028996904 | 0.775169149 |
| pcaec424.asymmetricdimethylar; | -0.004547929 | 0.015892188 | 0.775177236 |
| pcaec401.pcaac380              | 0.019987316  | 0.069854376 | 0.775212041 |

|                              |              |             |             |
|------------------------------|--------------|-------------|-------------|
| pcaec360.lysopcac170         | -0.006946356 | 0.024286493 | 0.775296923 |
| c14.tryptophan               | 0.000438853  | 0.001534767 | 0.775354955 |
| pcaac421.smc261              | -0.010801309 | 0.037775913 | 0.775362773 |
| lysopcac204.pcaac344         | 0.020889365  | 0.073061217 | 0.775374386 |
| pcaec383.leucine             | 0.004248332  | 0.014859574 | 0.775387586 |
| pcaec364.c141oh              | -0.036748869 | 0.128581921 | 0.775462056 |
| c51.smc241                   | 0.006394792  | 0.0223769   | 0.775480951 |
| pcaac406.pcaac323            | 0.034451008  | 0.120652674 | 0.775662713 |
| c5.asparticacid              | 0.003529893  | 0.012363923 | 0.775692739 |
| pcaec360.lysine              | -0.033753419 | 0.118238052 | 0.775715216 |
| pcaec321.tryptophan          | 0.000388872  | 0.001362541 | 0.77576699  |
| pcaac425.transhydroxyproline | 0.009254822  | 0.032431508 | 0.775795396 |
| lysine.methionine            | -0.015116667 | 0.052980889 | 0.775827597 |
| pcaac424.lysopcac140         | -0.000551746 | 0.001933906 | 0.775844196 |
| serine.tryptophan            | -0.000239788 | 0.000840553 | 0.775865415 |
| histidine.smc241             | -0.003761333 | 0.013187252 | 0.775902603 |
| c4.tryptophan                | 0.000488403  | 0.001712609 | 0.775936411 |
| c5.serotonin                 | 0.050720642  | 0.177910582 | 0.776005233 |
| glutamicacid.tryptophan      | -0.000117272 | 0.000411367 | 0.776014012 |
| lysopcac281.tryptophan       | -0.001356325 | 0.004758709 | 0.776059607 |
| pcaec402.tryptophan          | -0.000995064 | 0.003491594 | 0.776083414 |
| smc241.c8                    | -0.01241909  | 0.043590988 | 0.776150679 |
| pcaac342.c51dc               | 0.032621746  | 0.11451489  | 0.776174653 |
| c0.pcaac426                  | 0.0125486    | 0.044087941 | 0.776360033 |
| c181.pcaec301                | -0.012186274 | 0.042818887 | 0.776380024 |
| c181.smc241                  | 0.004073822  | 0.014315022 | 0.776392817 |
| pcaec343.smc261              | 0.011685132  | 0.041062096 | 0.776401582 |
| creatinine.c3                | 0.009494309  | 0.03336693  | 0.776424322 |
| pcaec386.pcaac300            | -0.017184742 | 0.060397314 | 0.776435206 |
| c0.pcaec386                  | 0.007552333  | 0.026544323 | 0.776443189 |
| pcaac323.pcaec362            | 0.006830802  | 0.024011328 | 0.776470201 |
| c12.pcaac240                 | 0.004268056  | 0.015003752 | 0.776482882 |
| pcaac425.pcaec446            | -0.03733559  | 0.131276343 | 0.776529795 |
| pcaec382.tryptophan          | -0.00064229  | 0.002258434 | 0.776536262 |
| phenylalanine.c162           | 0.026391686  | 0.092808346 | 0.77655806  |
| asparticacid.pcaac425        | 0.027987309  | 0.098438827 | 0.776600803 |
| pcaac384.pcaac341            | 0.004292864  | 0.015099907 | 0.776611751 |
| smohc241.pcaec384            | 0.018818646  | 0.066204039 | 0.776646264 |
| lysine.methioninesulfoxide   | 0.005659149  | 0.019914022 | 0.776702169 |
| pcaac421.c2                  | -0.015314679 | 0.053907585 | 0.776769285 |
| pcaac421.pcaec445            | -0.017661963 | 0.062173975 | 0.776783133 |
| pcaac405.pcaac404            | 0.010182176  | 0.035861136 | 0.776890051 |
| c162.pcaac240                | -0.003378088 | 0.011897489 | 0.776890531 |

|                                |              |             |             |
|--------------------------------|--------------|-------------|-------------|
| serotonin.pcaac421             | 0.003996959  | 0.014079467 | 0.776926563 |
| smohc222.pcaac365              | 0.018231017  | 0.064223505 | 0.776939875 |
| pcaec403.putrescine            | 0.025017289  | 0.088144975 | 0.776976963 |
| pcaec383.tryptophan            | -0.000591492 | 0.002084544 | 0.777029486 |
| pcaec446.pcaec422              | 0.010125822  | 0.035690875 | 0.777061711 |
| glutamine.lysopcac170          | 0.003232218  | 0.011397101 | 0.777145069 |
| pcaac342.c8                    | -0.014741967 | 0.051989448 | 0.777178019 |
| smohc141.lysine                | -0.017859826 | 0.063013515 | 0.777276233 |
| lysopcac140.c8                 | -0.011738265 | 0.041421851 | 0.777310735 |
| pcaac401.glycine               | 0.00522133   | 0.018428735 | 0.777355056 |
| smc241.pcaac364                | 0.016048025  | 0.056644349 | 0.77736533  |
| c2.pcaac240                    | -0.006302134 | 0.022250316 | 0.77742199  |
| c3.pcaec343                    | -0.028786108 | 0.101647665 | 0.777454853 |
| pcaec364.isoleucine            | 0.005191719  | 0.018333567 | 0.777465475 |
| pcaec385.pcaac402              | -0.00717605  | 0.025342485 | 0.777479441 |
| asymmetricdimethylarginine.pca | -0.010785453 | 0.038093867 | 0.77750582  |
| pcaac404.pcaec342              | -0.031829067 | 0.112421106 | 0.777509461 |
| c12.pcaac420                   | 0.030950254  | 0.109318615 | 0.77751243  |
| lysopcac182.pcaac240           | -0.003754691 | 0.013268619 | 0.777622923 |
| creatinine.alanine             | -0.005886159 | 0.020811892 | 0.777736536 |
| pcaac424.pcaec341              | -0.006886492 | 0.024352077 | 0.77776565  |
| pcaec360.pcaac424              | 0.003340419  | 0.011813787 | 0.777790659 |
| c14.lysopcac140                | 0.000277063  | 0.000980117 | 0.77784636  |
| pcaec365.pcaec401              | 0.014706253  | 0.052028511 | 0.777865946 |
| lysopcac280.tyrosine           | 0.016869014  | 0.059692252 | 0.777910204 |
| ornithine.lysopcac140          | -0.002883045 | 0.010203108 | 0.777936471 |
| asparagine.phenylalanine       | -0.009853121 | 0.034871356 | 0.777943427 |
| pcaec381.tryptophan            | -0.000447547 | 0.001583982 | 0.777951871 |
| smc260.lysopcac281             | -0.004986358 | 0.017650037 | 0.777976867 |
| c181.pcaac421                  | -0.005156806 | 0.018254358 | 0.7779886   |
| c141.tryptophan                | 0.000964474  | 0.003414945 | 0.77804206  |
| pcaec383.tyrosine              | 0.022242054  | 0.078753861 | 0.778043936 |
| pcaac404.pcaac420              | -0.020509348 | 0.072635581 | 0.778093971 |
| pcaac384.pcaac363              | -0.001889024 | 0.006691655 | 0.77814294  |
| pcaac344.prolinr               | -0.014705979 | 0.052100628 | 0.778169301 |
| pcaac420.c8                    | -0.012012168 | 0.042557432 | 0.778171794 |
| c182.pcaac384                  | 0.014297561  | 0.050674767 | 0.77825918  |
| pcaac385.pcaac321              | -0.007073429 | 0.025075311 | 0.778302181 |
| lysopcac170.c51                | -0.026640869 | 0.094467533 | 0.778360755 |
| pcaec443.c102                  | -0.011614524 | 0.041185064 | 0.77836281  |
| pcaac322.c4                    | -0.002998729 | 0.010634143 | 0.778376227 |
| pcaec422.phenylalanine         | 0.015637265  | 0.055453454 | 0.778377466 |
| pcaac365.smohc221              | 0.017627754  | 0.062518029 | 0.778397577 |

|                              |              |             |             |
|------------------------------|--------------|-------------|-------------|
| alphaaminoadipicacid.h1      | -0.002633695 | 0.009340873 | 0.778404401 |
| lysopcac140.serine           | 0.021138186  | 0.074970991 | 0.778406145 |
| pcaac364.lysopcac140         | -0.0004817   | 0.001708723 | 0.778440589 |
| glutamine.tryptophan         | 0.000225093  | 0.000798711 | 0.77850653  |
| pcaac404.methioninesulfoxide | 0.009772931  | 0.034683347 | 0.778540556 |
| smohc222.tryptophan          | 0.000565491  | 0.002006968 | 0.778549789 |
| smohc222.lysine              | 0.018992782  | 0.067424042 | 0.778605093 |
| c14.spermidine               | 0.020170789  | 0.071608968 | 0.778614192 |
| alanine.pcaec445             | 0.011821565  | 0.04197727  | 0.778661189 |
| pcaec342.smc181              | -0.004309929 | 0.01530507  | 0.778674052 |
| pcaec341.pcaac281            | 0.001323215  | 0.004700089 | 0.778728805 |
| pcaec445.pcaac402            | -0.011432352 | 0.040626009 | 0.778824563 |
| pcaac366.pcaac425            | -0.040396083 | 0.14355355  | 0.77882759  |
| phenylalanine.pcaac360       | -0.008826511 | 0.031373499 | 0.77887678  |
| pcaec401.serine              | -0.020789214 | 0.073932681 | 0.778988055 |
| pcaac342.c141                | 0.01003581   | 0.03569168  | 0.778996058 |
| pcaac364.c102                | 0.009720967  | 0.034581745 | 0.779056944 |
| pcaac380.lysopcac180         | -0.020379423 | 0.072501091 | 0.779064491 |
| c141oh.serotonin             | -0.014287222 | 0.050842624 | 0.779127642 |
| c2.pcaec445                  | -0.022877628 | 0.081450936 | 0.779229105 |
| pcaac343.tryptophan          | 0.002226704  | 0.007928665 | 0.779255063 |
| pcaec386.pcaec343            | -0.030793656 | 0.109649617 | 0.779259195 |
| pcaec362.smohc161            | 0.007028796  | 0.02503334  | 0.779304718 |
| histidine.ornithine          | 0.023551849  | 0.083907868 | 0.779373899 |
| smc261.tryptophan            | 0.000559995  | 0.001995364 | 0.77940391  |
| pcaec420.pcaec405            | 0.025558114  | 0.091080869 | 0.779433594 |
| pcaac361.threonine           | -0.008877678 | 0.031637687 | 0.779437043 |
| pcaac322.smc260              | 0.007752193  | 0.027642617 | 0.779560301 |
| pcaac361.pcaec401            | 0.011413845  | 0.04070056  | 0.779567128 |
| pcaec380.pcaec386            | 0.004328092  | 0.015437685 | 0.779625061 |
| pcaac321.pcaec401            | -0.000783968 | 0.002796816 | 0.779664546 |
| c141.lysopcac170             | -0.005746592 | 0.020502001 | 0.779674602 |
| pcaec446.lysopcac204         | -0.008103881 | 0.028918596 | 0.779723149 |
| pcaec424.smc160              | -0.014977142 | 0.053452263 | 0.779749331 |
| smc240.transhydroxyproline   | 0.01008509   | 0.036004484 | 0.779818289 |
| pcaec321.pcaec361            | -0.029331136 | 0.104730989 | 0.779852619 |
| smc202.tryptophan            | 0.000724265  | 0.002586283 | 0.779868445 |
| pcaac364.lysopcac203         | 0.003887955  | 0.013883911 | 0.779874458 |
| pcaac360.pcaec340            | 0.023034469  | 0.082257122 | 0.779876802 |
| lysine.c12                   | -0.023917204 | 0.085429069 | 0.779926136 |
| pcaac322.h1                  | 0.000872048  | 0.003116243 | 0.780022681 |
| c102.glycine                 | -0.007739216 | 0.027671239 | 0.780141404 |
| pcaec443.tryptophan          | -0.000866443 | 0.003098159 | 0.780157224 |



|                                 |              |             |             |
|---------------------------------|--------------|-------------|-------------|
| pcaac362.c2                     | -0.021696719 | 0.077589663 | 0.780179949 |
| h1.pcaec363                     | 0.010710049  | 0.038304195 | 0.780202177 |
| smc241.pcaec386                 | 0.003610689  | 0.01291654  | 0.78025205  |
| lysopcac160.pcaac402            | -0.021942135 | 0.078503672 | 0.780279159 |
| alanine.glutamine               | 0.005462325  | 0.019544415 | 0.780295942 |
| smc180.pcaac321                 | 0.007684029  | 0.027496737 | 0.780319119 |
| asymmetricdimethylarginine.smc  | -0.010133742 | 0.036280879 | 0.780425405 |
| asparticacid.tryptophan         | -0.000351567 | 0.001258892 | 0.780461177 |
| isoleucine.pcaac404             | 0.005962487  | 0.02136414  | 0.780597716 |
| asymmetricdimethylarginine.lysc | 0.000692094  | 0.002479868 | 0.780600486 |
| pcaec401.c142                   | 0.010898131  | 0.039056598 | 0.78063927  |
| smc240.pcaac425                 | 0.027665569  | 0.099199526 | 0.780751223 |
| c16.pcaac421                    | -0.015864242 | 0.056896209 | 0.780797457 |
| pcaac362.pcaec383               | -0.017769758 | 0.063748354 | 0.780858156 |
| pcaac406.creatinine             | -0.009512697 | 0.034136209 | 0.780919175 |
| lysopcac170.pcaec420            | 0.012915244  | 0.046351863 | 0.780945196 |
| pcaec365.pcaec321               | 0.014615786  | 0.052455779 | 0.780948437 |
| pcaec386.pcaac425               | 0.03308506   | 0.11881569  | 0.781081416 |
| asparticacid.pcaac424           | 0.005868483  | 0.021078804 | 0.78111985  |
| pcaec401.pcaac421               | -0.004228266 | 0.015195976 | 0.781240699 |
| pcaec384.lysopcac203            | 0.003885286  | 0.013964749 | 0.781262208 |
| lysopcac281.c4                  | -0.004078375 | 0.014663975 | 0.781337972 |
| pcaec421.pcaec424               | -0.010677096 | 0.038390263 | 0.781339615 |
| pcaec406.c182                   | -0.008241019 | 0.029631339 | 0.781340813 |
| smc180.serotonin                | -0.02279403  | 0.081981388 | 0.781401531 |
| smc181.tryptophan               | 0.000678513  | 0.002440675 | 0.781429813 |
| pcaac365.smc180                 | -0.008561418 | 0.030801518 | 0.781466389 |
| pcaec401.smc241                 | -0.014451011 | 0.052008386 | 0.781539289 |
| lysopcac161.pcaac323            | -0.042425509 | 0.152711988 | 0.781574052 |
| pcaac405.c3                     | 0.014199369  | 0.051126007 | 0.781636159 |
| pcaec322.lysopcac180            | -0.020466697 | 0.073730415 | 0.781746903 |
| methionine.h1                   | 0.000793152  | 0.002857974 | 0.781797334 |
| smc241.methionine               | 0.008926369  | 0.03217764  | 0.781884192 |
| smc180.tryptophan               | 0.000578135  | 0.002085302 | 0.782011619 |
| lysopcac140.c51dc               | 0.036475667  | 0.131571111 | 0.78202017  |
| alanine.lysopcac140             | -0.000508447 | 0.001834021 | 0.782020705 |
| pcaac380.lysopcac140            | -0.000517778 | 0.001867992 | 0.782056275 |
| pcaec361.c4                     | -0.005119614 | 0.018477436 | 0.782141048 |
| c16.pcaac341                    | -0.002067829 | 0.007465971 | 0.78222279  |
| smohc141.tryptophan             | 0.000596918  | 0.002155271 | 0.782230528 |
| smc241.tryptophan               | 0.001136557  | 0.004104281 | 0.782258966 |
| isoleucine.pcaec445             | -0.011107444 | 0.040142317 | 0.782426253 |
| lysopcac204.smc241              | 0.015770318  | 0.056998815 | 0.782444347 |

|                                |              |             |             |
|--------------------------------|--------------|-------------|-------------|
| pcaac342.c3                    | 0.027080389  | 0.097878345 | 0.782447456 |
| pcaac402.pcaac343              | 0.004450622  | 0.016086926 | 0.782457534 |
| alanine.leucine                | 0.002692219  | 0.009735776 | 0.782558967 |
| isoleucine.pcaac386            | 0.003418716  | 0.012364079 | 0.78257779  |
| pcaac406.pcaac445              | -0.014437643 | 0.052218977 | 0.782594034 |
| pcaac402.c2                    | -0.021911845 | 0.079259613 | 0.782613999 |
| smohc161.pcaac364              | -0.014156163 | 0.051219135 | 0.782669454 |
| c2.lysopcac181                 | 0.024954898  | 0.090292741 | 0.782674504 |
| pcaac344.c51dc                 | -0.033679791 | 0.121867211 | 0.782684474 |
| pcaac405.tryptophan            | -0.00135013  | 0.004886053 | 0.782716284 |
| pcaac406.valine                | 0.024327642  | 0.088062698 | 0.782769561 |
| glycine.pcaac323               | -0.028167681 | 0.101965777 | 0.782775101 |
| pcaac422.pcaac365              | -0.008691541 | 0.031470102 | 0.782822875 |
| c102.smc161                    | -0.032818233 | 0.118873211 | 0.782904477 |
| c101.pcaac424                  | 0.001324541  | 0.004799654 | 0.782990027 |
| pcaac423.pcaac321              | -0.006079294 | 0.02203737  | 0.78306901  |
| c102.putrescine                | 0.005293442  | 0.019189289 | 0.783075893 |
| pcaac363.tryptophan            | 0.001760704  | 0.00638547  | 0.78316636  |
| pcaac401.asparticacid          | -0.017501635 | 0.063519206 | 0.783321948 |
| pcaac322.pcaac420              | -0.007602649 | 0.027592919 | 0.783324993 |
| methionine.methioninesulfoxide | 0.004728064  | 0.01716063  | 0.783333361 |
| pcaac240.tryptophan            | -0.000555728 | 0.002017078 | 0.783338511 |
| lysopcac203.pcaac381           | -0.009909218 | 0.035970565 | 0.783361564 |
| asparticacid.pcaac384          | -0.009933079 | 0.036063099 | 0.783396212 |
| smohc141.pcaac380              | 0.016093497  | 0.058430672 | 0.783401711 |
| c102.pcaac381                  | -0.006265016 | 0.022746608 | 0.783403635 |
| lysopcac181.pcaac420           | 0.017464294  | 0.063422533 | 0.783451341 |
| pcaac401.arginine              | -0.02063523  | 0.074978331 | 0.783564998 |
| pcaac404.lysopcac281           | -0.00395053  | 0.014355243 | 0.783578943 |
| pcaac362.lysopcac203           | 0.007678272  | 0.027920541 | 0.783727143 |
| c5.pcaac320                    | 0.034914526  | 0.127079253 | 0.783925214 |
| pcaac424.c8                    | 0.011785892  | 0.042902963 | 0.783952527 |
| pcaac340.pcaac403              | -0.007442506 | 0.027092862 | 0.783957796 |
| lysopcac182.pcaac422           | 0.006628163  | 0.024133714 | 0.784004003 |
| pcaac301.phenylalanine         | -0.006340457 | 0.023089865 | 0.784037888 |
| arginine.tryptophan            | -0.000294286 | 0.001071694 | 0.784038009 |
| lysopcac182.pcaac321           | -0.003646912 | 0.013292737 | 0.784226063 |
| lysopcac140.c162               | 0.025007081  | 0.091179069 | 0.784295321 |
| pcaac322.pcaac361              | -0.019126272 | 0.069742921 | 0.784313554 |
| pcaac443.c16                   | 0.005549699  | 0.020236932 | 0.784316203 |
| alanine.tryptophan             | -0.000433416 | 0.001580623 | 0.784339486 |
| smc202.ornithine               | -0.008748564 | 0.03190675  | 0.784350346 |
| ornithine.smc240               | -0.003680206 | 0.01342209  | 0.784351433 |

|                               |              |             |             |
|-------------------------------|--------------|-------------|-------------|
| pcaac363.methioninesulfoxide  | 0.005678171  | 0.020710585 | 0.784368793 |
| smohc241.tryptophan           | 0.000733284  | 0.002674756 | 0.784382242 |
| pcaec363.lysopcac140          | 0.000357175  | 0.001302893 | 0.784389818 |
| c0.pcaac386                   | 0.011539553  | 0.042100654 | 0.784424918 |
| lysopcac280.tryptophan        | -0.000692275 | 0.002526088 | 0.784458942 |
| lysopcac180.lysopcac140       | 0.000896637  | 0.003271926 | 0.784466982 |
| h1.c2                         | 0.0099653    | 0.036365258 | 0.784471599 |
| c101.pcaec420                 | -0.01185812  | 0.043281356 | 0.784514522 |
| pcaac343.pcaac401             | -0.001014413 | 0.003702962 | 0.784538407 |
| pcaec406.lysopcac281          | 0.004348556  | 0.015873791 | 0.784538983 |
| pcaec362.lysopcac140          | 0.000295959  | 0.001080553 | 0.784576976 |
| c0.smc161                     | -0.026071987 | 0.095217362 | 0.784638829 |
| c141oh.tryptophan             | 0.000708597  | 0.002588639 | 0.784701719 |
| pcaac240.c181                 | 0.006172404  | 0.02255004  | 0.784711798 |
| pcaec423.pcaac360             | -0.012336111 | 0.045080518 | 0.784768667 |
| pcaac425.pcaac360             | 0.009939117  | 0.036328818 | 0.784813523 |
| pcaec402.pcaac363             | -0.002712023 | 0.009917661 | 0.784916179 |
| pcaec444.pcaec401             | 0.012567842  | 0.045964478 | 0.784938223 |
| isoleucine.smc260             | -0.004702087 | 0.017198805 | 0.784960448 |
| pcaac240.pcaac300             | -0.015143414 | 0.055411217 | 0.785040713 |
| pcaac424.transhydroxyproline  | 0.016297459  | 0.059642565 | 0.785070893 |
| pcaac386.pcaec385             | -0.018422265 | 0.06742493  | 0.785090704 |
| lysine.glutamicacid           | -0.011998538 | 0.043924002 | 0.785137076 |
| h1.pcaec403                   | -0.015490443 | 0.056752917 | 0.785306246 |
| isoleucine.pcaec321           | 0.006232576  | 0.02283707  | 0.785329624 |
| methioninesulfoxide.c141      | -0.016008678 | 0.058663807 | 0.785349843 |
| pcaac386.tryptophan           | 0.000496385  | 0.001820021 | 0.785466706 |
| smc181.pcaec341               | 0.017013148  | 0.062444021 | 0.785682871 |
| smc160.tryptophan             | 0.000544449  | 0.001999151 | 0.785770634 |
| pcaec382.smc260               | 0.013776491  | 0.050589177 | 0.785785275 |
| lysopcac203.asparagine        | 0.003632877  | 0.01334043  | 0.785785351 |
| c0.smc180                     | -0.004933358 | 0.018116038 | 0.78578605  |
| c141.pcaec446                 | -0.008443011 | 0.031033241 | 0.785982815 |
| c51dc.pcaec380                | 0.014682211  | 0.053981052 | 0.786040528 |
| pcaec403.pcaec382             | -0.01790394  | 0.065851898 | 0.78612212  |
| pcaac322.pcaac300             | 0.030171057  | 0.111011063 | 0.786197066 |
| pcaec322.c8                   | 0.015275936  | 0.056211673 | 0.786217687 |
| pcaac321.glutamicacid         | 0.025612909  | 0.094276292 | 0.786277652 |
| lysopcac281.pcaec401          | 0.009562778  | 0.035207042 | 0.786326544 |
| pcaac381.threonine            | 0.012597417  | 0.046404653 | 0.786439097 |
| pcaec341.tryptophan           | 0.000407264  | 0.001500453 | 0.786470866 |
| alphaaminoadipicacid.pcaac406 | 0.011034084  | 0.040659079 | 0.786506842 |
| lysopcac204.pcaac321          | 0.008640069  | 0.031838745 | 0.786515231 |

|                                |              |             |             |
|--------------------------------|--------------|-------------|-------------|
| pcaec343.phenylalanine         | 0.011863468  | 0.043734419 | 0.786598149 |
| pcaac320.pcaec401              | 0.017032693  | 0.062832213 | 0.786735841 |
| pcaec425.tryptophan            | -0.001128989 | 0.004164913 | 0.786744093 |
| pcaec381.methionine            | -0.005699723 | 0.021031674 | 0.786793844 |
| smc160.c4                      | -0.005764853 | 0.021279635 | 0.786868456 |
| pcaec402.lysopcac170           | 0.017438628  | 0.064396085 | 0.786950421 |
| pcaac425.pcaec384              | -0.007407841 | 0.027364138 | 0.787018845 |
| alphaaminoadipicacid.pcaac384  | 0.015777997  | 0.058303459 | 0.787091706 |
| pcaac320.pcaec380              | 0.01867051   | 0.069005856 | 0.787133468 |
| pcaec443.lysopcac160           | -0.00775699  | 0.028681125 | 0.787216276 |
| c3.pcaac240                    | 0.009052722  | 0.033478595 | 0.787256936 |
| pcaec443.lysopcac204           | -0.024066021 | 0.089006654 | 0.787271354 |
| c141oh.smc260                  | 0.009241458  | 0.034186477 | 0.787317061 |
| pcaac421.pcaec380              | -0.024200792 | 0.089528574 | 0.78732578  |
| smc180.pcaac365                | -0.018751071 | 0.069412856 | 0.787460367 |
| pcaec443.asymmetricdimethylar; | -0.009021258 | 0.033397084 | 0.787473549 |
| c18.pcaac402                   | -0.006546806 | 0.024247296 | 0.78756541  |
| pcaac363.pcaac386              | -0.004774067 | 0.017683621 | 0.787588711 |
| pcaec446.pcaec423              | 0.008541349  | 0.031652617 | 0.787684359 |
| lysopcac160.smohc161           | -0.004667515 | 0.017297525 | 0.787691579 |
| pcaec401.pcaac403              | -0.007635513 | 0.028298254 | 0.787702625 |
| pcaac281.glycine               | 0.02886713   | 0.107000836 | 0.787732252 |
| pcaec380.lysopcac181           | 0.016795305  | 0.062255162 | 0.787734116 |
| smc180.pcaac344                | -0.021218073 | 0.078651594 | 0.787740854 |
| pcaec361.pcaec404              | 0.01594289   | 0.059114216 | 0.787799643 |
| pcaac401.pcaac425              | 0.039108583  | 0.145013947 | 0.787805754 |
| c182.pcaec301                  | 0.014499608  | 0.053782374 | 0.787875362 |
| c142.smc260                    | 0.006951195  | 0.02578873  | 0.787916727 |
| c162.pcaac425                  | -0.013086173 | 0.048562048 | 0.787970963 |
| c10.pcaec361                   | -0.002979703 | 0.011058684 | 0.787992949 |
| lysopcac204.pcaec403           | -0.012791487 | 0.047514807 | 0.788172685 |
| pcaac322.tryptophan            | 0.000569432  | 0.002115591 | 0.788211454 |
| lysine.pcaec403                | -0.00821348  | 0.030516089 | 0.788217295 |
| pcaec300.tryptophan            | 0.000470511  | 0.001748715 | 0.788287566 |
| pcaec443.smc241                | -0.003641929 | 0.013540153 | 0.78835546  |
| pcaec406.pcaac363              | -0.002963631 | 0.011018545 | 0.788359276 |
| methionine.smc161              | 0.012423137  | 0.046191191 | 0.788372503 |
| pcaec363.pcaec321              | -0.002227093 | 0.008280873 | 0.788377153 |
| c3.pcaec365                    | -0.005965314 | 0.022184507 | 0.788414616 |
| pcaac385.pcaec365              | 0.01074435   | 0.039977483 | 0.788518654 |
| pcaac380.smc261                | -0.011145727 | 0.041477023 | 0.788549006 |
| pcaec385.pcaac300              | 0.013526616  | 0.050339152 | 0.788557341 |
| lysopcac280.c4                 | -0.003699541 | 0.013767856 | 0.78855815  |

|                           |              |             |             |
|---------------------------|--------------|-------------|-------------|
| pcaec420.pcaec383         | -0.028277952 | 0.105241645 | 0.788568249 |
| phenylalanine.lysopcac140 | 0.000431849  | 0.001607845 | 0.788650186 |
| c8.pcaec322               | -0.014357987 | 0.053461072 | 0.788665366 |
| pcaac321.smc180           | -0.003431282 | 0.012777862 | 0.78869276  |
| pcaac404.pcaac384         | -0.015372662 | 0.057265332 | 0.788759664 |
| pcaec342.pcaec321         | -0.003749006 | 0.01397118  | 0.788842366 |
| pcaac425.smc261           | -0.021398319 | 0.079745996 | 0.788848202 |
| c162.pcaec423             | -0.013598365 | 0.050687363 | 0.788887946 |
| pcaac424.serine           | -0.031525859 | 0.117532591 | 0.788925138 |
| creatinine.pcaac425       | 0.02221417   | 0.08282603  | 0.788946666 |
| arginine.phenylalanine    | 0.012450444  | 0.046436605 | 0.789012525 |
| lysopcac280.phenylalanine | 0.013379544  | 0.049904113 | 0.789021727 |
| pcaec421.pcaec363         | 0.010086544  | 0.037630652 | 0.789071196 |
| c141.pcaac323             | -0.02291675  | 0.085506353 | 0.789092997 |
| pcaec382.lysopcac180      | -0.029027445 | 0.108309621 | 0.789099098 |
| smohc222.pcaac380         | 0.015728156  | 0.058695546 | 0.789131858 |
| c102.c101                 | 0.00746835   | 0.027871718 | 0.789137408 |
| glycine.pcaac425          | -0.018996692 | 0.070896056 | 0.789139797 |
| lysopcac182.pcaac381      | -0.005939236 | 0.022173328 | 0.789213825 |
| c51.histidine             | 0.01950695   | 0.072829752 | 0.789222896 |
| pcaec446.c182             | 0.009831551  | 0.036718741 | 0.78929219  |
| pcaec423.threonine        | -0.006005803 | 0.02244154  | 0.789394388 |
| lysopcac160.pcaac344      | 0.022815935  | 0.085262975 | 0.789413621 |
| glutamine.pcaec365        | 0.006934465  | 0.025924942 | 0.789500051 |
| pcaac341.glycine          | 0.014978292  | 0.055997982 | 0.789502528 |
| pcaac424.acetylmethionine | 0.029962284  | 0.11206135  | 0.789583356 |
| pcaac323.glycine          | -0.011214484 | 0.041949169 | 0.78961322  |
| citruline.pcaec446        | -0.030308954 | 0.113389745 | 0.789641001 |
| c16.tryptophan            | 0.000896018  | 0.003352344 | 0.789654706 |
| pcaec423.pcaec301         | -0.022299564 | 0.083434108 | 0.789662013 |
| smc240.pcaec385           | -0.015138357 | 0.056646644 | 0.789684786 |
| putrescine.pcaec360       | 0.001240613  | 0.004643252 | 0.789727542 |
| pcaec363.pcaac425         | 0.02838244   | 0.106278154 | 0.789826028 |
| lysopcac170.pcaec403      | -0.011385465 | 0.042640058 | 0.789860393 |
| pcaec300.lysopcac281      | -0.003994365 | 0.014961935 | 0.789894866 |
| pcaac420.threonine        | -0.007198257 | 0.026964187 | 0.789904291 |
| arginine.c51dc            | -0.034443248 | 0.129027148 | 0.789912339 |
| pcaec422.valine           | -0.012975353 | 0.048624948 | 0.789989294 |
| pcaac380.lysopcac170      | 0.007567545  | 0.028373768 | 0.790094087 |
| pcaec364.pcaec403         | 0.013209878  | 0.049534055 | 0.790114421 |
| lysopcac182.lysopcac281   | -0.003798401 | 0.014258954 | 0.790341626 |
| pcaac381.tryptophan       | 0.011271824  | 0.042333306 | 0.790436412 |
| lysopcac161.c5            | 0.006247213  | 0.023463116 | 0.790441773 |

|                                |              |             |             |
|--------------------------------|--------------|-------------|-------------|
| citruline.pcaac406             | -0.020734743 | 0.077910267 | 0.790534423 |
| phenylalanine.pcaac424         | -0.0061467   | 0.023100199 | 0.790571008 |
| pcaec340.tryptophan            | 0.000458987  | 0.001725867 | 0.790680776 |
| pcaac421.valine                | 0.018079653  | 0.067994179 | 0.790715948 |
| smc260.isoleucine              | 0.003404977  | 0.012812435 | 0.790826933 |
| pcaec420.smc241                | -0.005760086 | 0.021676712 | 0.790848974 |
| prolinr.pcaec401               | 0.005934661  | 0.02234324  | 0.790936348 |
| pcaac422.asymmetricdimethylar; | 0.004186134  | 0.015763201 | 0.790974447 |
| pcaec300.glycine               | 0.015643746  | 0.0589129   | 0.790992471 |
| pcaac323.pcaec445              | 0.015531435  | 0.058493926 | 0.791006358 |
| pcaac421.tryptophan            | -0.001124511 | 0.004235405 | 0.791021462 |
| pcaec404.histidine             | 0.021478528  | 0.080940275 | 0.791128959 |
| pcaec380.pcaec446              | -0.016732971 | 0.063071946 | 0.791177345 |
| pcaec360.pcaac240              | 0.006438804  | 0.024273931 | 0.791211029 |
| pcaac343.asparticacid          | 0.012456229  | 0.046985575 | 0.791325115 |
| c16.c8                         | 0.006443474  | 0.024311733 | 0.791380426 |
| arginine.pcaac385              | 0.009973552  | 0.037637397 | 0.791415073 |
| smohc222.pcaec322              | -0.038274134 | 0.144467602 | 0.791459808 |
| pcaac381.pcaac424              | 0.00684719   | 0.025848981 | 0.79149073  |
| h1.c16                         | -0.010312251 | 0.038937697 | 0.791530934 |
| pcaec405.pcaec322              | 0.021595842  | 0.081568091 | 0.791593458 |
| pcaac320.tryptophan            | 0.00039302   | 0.001484729 | 0.791632151 |
| c101.pcaac343                  | -0.007219818 | 0.027275921 | 0.791641723 |
| pcaac366.lysopcac180           | 0.018383445  | 0.069470332 | 0.791697632 |
| c10.pcaec445                   | -0.028910246 | 0.109293159 | 0.791776651 |
| putrescine.pcaac364            | 0.015043972  | 0.056873097 | 0.791778132 |
| methioninesulfoxide.pcaec386   | 0.004494516  | 0.016993217 | 0.791800778 |
| pcaac401.lysopcac140           | -0.000510455 | 0.001930101 | 0.79181478  |
| histidine.pcaac404             | -0.001428102 | 0.005400234 | 0.79182917  |
| c10.smc240                     | -0.00942452  | 0.035642522 | 0.791855298 |
| ornithine.putrescine           | 0.013361655  | 0.050551046 | 0.791930531 |
| pcaac361.pcaac425              | 0.026024587  | 0.098462202 | 0.791937926 |
| pcaac386.pcaec380              | -0.020469653 | 0.077466006 | 0.79199172  |
| lysopcac170.pcaac421           | -0.002723655 | 0.010308215 | 0.792006122 |
| c2.creatinine                  | 0.002381629  | 0.009015208 | 0.792038961 |
| pcaec361.c8                    | -0.012160383 | 0.04604145  | 0.792085763 |
| creatinine.smohc141            | -0.026917923 | 0.101920032 | 0.792093375 |
| pcaec406.pcaac380              | -0.034881301 | 0.132111327 | 0.792153865 |
| histidine.tryptophan           | -0.000601055 | 0.002277176 | 0.792216886 |
| ornithine.tryptophan           | -0.00071942  | 0.002725898 | 0.792237807 |
| glutamicacid.smc160            | -0.019111984 | 0.072449594 | 0.792332741 |
| c51dc.pcaac421                 | -0.002841715 | 0.010773282 | 0.792350159 |
| c51.c162                       | 0.023304021  | 0.088372809 | 0.792406355 |

|                               |              |             |             |
|-------------------------------|--------------|-------------|-------------|
| pcaec300.pcaec444             | 0.034947202  | 0.132528924 | 0.792411244 |
| smohc161.lysine               | 0.016790475  | 0.063684951 | 0.792446525 |
| pcaac360.lysopcac280          | -0.00238531  | 0.00904968  | 0.792499964 |
| pcaec422.lysopcac280          | -0.002843725 | 0.010789955 | 0.792520384 |
| c51.pcaec360                  | -0.001437922 | 0.005457984 | 0.792597368 |
| h1.leucine                    | -0.002599571 | 0.009869552 | 0.792643392 |
| lysopcac161.lysopcac204       | -0.011988815 | 0.045521156 | 0.792662658 |
| pcaec424.lysopcac170          | -0.005549361 | 0.021071334 | 0.792668285 |
| pcaec425.pcaec384             | -0.019386342 | 0.073638279 | 0.792742282 |
| pcaac363.pcaec421             | -0.001493736 | 0.005674042 | 0.792747325 |
| pcaac240.pcaac384             | 0.01006727   | 0.038244862 | 0.792767279 |
| c12.c51dc                     | -0.037655921 | 0.143161465 | 0.792921752 |
| lysopcac181.spermidine        | 0.020536939  | 0.078079289 | 0.792925139 |
| lysopcac181.pcaac421          | -0.002417537 | 0.009196129 | 0.79303305  |
| smohc241.smc202               | 0.016605508  | 0.063167638 | 0.793038003 |
| pcaec386.c3                   | 0.006800826  | 0.025877008 | 0.793089186 |
| pcaac381.lysopcac170          | 0.01240124   | 0.047187924 | 0.793095394 |
| acetylmithoine.lysopcac180    | -0.020382131 | 0.077580831 | 0.79316012  |
| alphaaminoadipicacid.pcaac300 | -0.010311948 | 0.039256685 | 0.793191789 |
| c14.pcaac366                  | -0.013246604 | 0.050432073 | 0.793205465 |
| pcaec341.pcaac343             | 0.010901145  | 0.041505262 | 0.793218847 |
| methionine.phenylalanine      | -0.010380472 | 0.039524933 | 0.793229545 |
| citruline.lysopcac140         | -0.000705627 | 0.002687276 | 0.793268116 |
| smc180.smc241                 | 0.012811506  | 0.048806817 | 0.793334768 |
| pcaac341.threonine            | 0.006484665  | 0.024707907 | 0.793366454 |
| pcaac322.pcaec363             | -0.009283273 | 0.035380262 | 0.793418261 |
| glycine.lysine                | -0.016739098 | 0.063843824 | 0.793570161 |
| pcaac342.isoleucine           | 0.007691819  | 0.029344373 | 0.793620768 |
| smc260.pcaac300               | -0.021749098 | 0.08298533  | 0.793650605 |
| pcaac323.tryptophan           | 0.001908955  | 0.007283771 | 0.793650867 |
| pcaac424.pcaac364             | -0.0163355   | 0.062337709 | 0.793677681 |
| pcaac381.pcaec365             | 0.005905188  | 0.022537579 | 0.793703271 |
| serine.transhydroxyproline    | -0.01398593  | 0.053396463 | 0.793771782 |
| c141oh.kynurenine             | -0.001461962 | 0.005582459 | 0.79380347  |
| pcaec380.c8                   | -0.012316141 | 0.047031216 | 0.79381374  |
| serine.pcaec341               | -0.009798241 | 0.037417983 | 0.793823342 |
| c8.methionine                 | 0.011297012  | 0.043156059 | 0.793891028 |
| pcaec444.pcaec380             | 0.011986163  | 0.04580422  | 0.793959238 |
| pcaac380.pcaac424             | 0.00262331   | 0.010030879 | 0.79408163  |
| pcaac300.pcaac401             | -0.000999874 | 0.00382432  | 0.794137039 |
| alanine.lysopcac160           | 0.00336926   | 0.01288677  | 0.79413732  |
| c142.pcaac321                 | 0.007503616  | 0.028703248 | 0.794160879 |
| smc240.tryptophan             | 0.001275495  | 0.004879214 | 0.794165851 |

|                         |              |             |             |
|-------------------------|--------------|-------------|-------------|
| pcaec406.pcaec341       | -0.011740848 | 0.044936588 | 0.794272102 |
| c12.c4                  | -0.00335058  | 0.012828135 | 0.794338271 |
| pcaac406.pcaec360       | 0.000916199  | 0.003509471 | 0.794434622 |
| glutamine.smc241        | -0.005763038 | 0.022077515 | 0.794456332 |
| pcaec380.smc260         | 0.009085106  | 0.034804999 | 0.794462298 |
| pcaec423.pcaac323       | 0.020943254  | 0.080235556 | 0.794467424 |
| pcaec360.pcaec420       | -0.00670713  | 0.025707167 | 0.794557485 |
| smc241.pcaac321         | 0.005963362  | 0.022857176 | 0.794563914 |
| pcaec342.lysopcac281    | 0.010318226  | 0.039553848 | 0.794588108 |
| pcaec423.c102           | -0.008318575 | 0.031891861 | 0.794609938 |
| methionine.pcaec342     | -0.026527529 | 0.101726276 | 0.794658662 |
| pcaac343.c141           | -0.011630606 | 0.044601532 | 0.794663788 |
| pcaec422.pcaec420       | -0.006590186 | 0.025274767 | 0.794683222 |
| pcaec360.phenylalanine  | -0.008806305 | 0.033782645 | 0.794734249 |
| pcaac343.lysopcac160    | -0.007097472 | 0.027232521 | 0.794773158 |
| kynurenine.pcaec322     | 0.01600772   | 0.061430954 | 0.794807146 |
| pcaac384.smc260         | -0.008069581 | 0.030976569 | 0.794864657 |
| pcaac403.pcaac420       | -0.039595723 | 0.152030178 | 0.794910449 |
| isoleucine.smc241       | -0.005316397 | 0.020415517 | 0.794938811 |
| c5.c141                 | -0.012540651 | 0.048199859 | 0.795115367 |
| pcaec423.spermidine     | -0.017886993 | 0.068751659 | 0.795124665 |
| lysine.lysopcac170      | 0.008048707  | 0.030937254 | 0.795129172 |
| smc160.pcaac425         | 0.021968583  | 0.084447085 | 0.795141619 |
| pcaec443.c141           | 0.011611502  | 0.044656213 | 0.795238828 |
| smc180.pcaac300         | -0.012918168 | 0.049685104 | 0.79525348  |
| c51.pcaac240            | -0.00504486  | 0.019408035 | 0.795302864 |
| leucine.smc161          | -0.016455236 | 0.063308015 | 0.795313065 |
| lysopcac140.pcaac384    | 0.02628783   | 0.101165711 | 0.795370189 |
| pcaac366.pcaec386       | 0.006011347  | 0.0231359   | 0.79538676  |
| pcaec444.c8             | -0.012845521 | 0.049452911 | 0.79544458  |
| smohc241.pcaec340       | -0.021147045 | 0.081429682 | 0.795487353 |
| kynurenine.pcaec421     | -0.000537395 | 0.002070232 | 0.795575891 |
| c16.pcaec384            | 0.007535562  | 0.02903765  | 0.795631299 |
| pcaec420.pcaec343       | 0.015193292  | 0.058548564 | 0.795639814 |
| serotonin.threonine     | 0.006186443  | 0.023842318 | 0.795659647 |
| pcaac321.tryptophan     | 0.000614566  | 0.002369436 | 0.79573739  |
| c5.pcaac343             | -0.009596742 | 0.037000786 | 0.795742277 |
| pcaac383.lysine         | -0.016247927 | 0.062663532 | 0.795801934 |
| lysopcac161.lysopcac170 | 0.00709352   | 0.027358499 | 0.795808154 |
| smc181.pcaac381         | 0.01187251   | 0.045792238 | 0.795816843 |
| pcaec322.pcaac361       | 0.019764571  | 0.076250822 | 0.795866384 |
| pcaec386.pcaac420       | 0.018954259  | 0.073136854 | 0.795899614 |
| pcaec383.c3             | -0.012168144 | 0.046961022 | 0.795938094 |



|                                 |              |             |             |
|---------------------------------|--------------|-------------|-------------|
| c141.pcaac360                   | 0.00892547   | 0.034456682 | 0.795997414 |
| pcaec420.kynurenine             | -0.003263887 | 0.012602969 | 0.796041183 |
| pcaac342.smohc241               | 0.015179693  | 0.058649061 | 0.796160711 |
| c51dc.smc240                    | 0.007353353  | 0.028412937 | 0.796175699 |
| leucine.pcaec406                | -0.004975399 | 0.019231586 | 0.796247472 |
| pcaac321.pcaec383               | -0.027051045 | 0.104597028 | 0.79631541  |
| pcaac421.lysopcac140            | -0.000357529 | 0.001382482 | 0.796321415 |
| c12.pcaac322                    | -0.009168197 | 0.035492125 | 0.796550406 |
| pcaec424.h1                     | 0.001067224  | 0.004131775 | 0.796565471 |
| pcaec424.pcaec361               | 0.003167842  | 0.012267598 | 0.796618209 |
| smc260.pcaec446                 | -0.005806998 | 0.022487911 | 0.796618824 |
| arginine.pcaec422               | 0.007706006  | 0.029848595 | 0.796663294 |
| c182.pcaec444                   | 0.019546448  | 0.075712542 | 0.796665777 |
| pcaac341.pcaac322               | -0.025619433 | 0.09926435  | 0.796722448 |
| pcaec343.pcaec321               | -0.003859431 | 0.01495994  | 0.796806083 |
| acetylmithoine.pcaec403         | 0.014168931  | 0.054926621 | 0.796824032 |
| pcaec405.acetylmithoine         | -0.015452416 | 0.059908313 | 0.796844572 |
| pcaac362.tyrosine               | -0.013315338 | 0.051642213 | 0.796918644 |
| pcaec384.pcaac426               | -0.014588302 | 0.056584498 | 0.796936972 |
| c16.threonine                   | 0.008313364  | 0.032250406 | 0.796966999 |
| pcaec425.smc202                 | -0.017427567 | 0.067610511 | 0.796975701 |
| pcaac380.c8                     | -0.013065983 | 0.050707598 | 0.797045863 |
| smc202.c3                       | 0.005331003  | 0.020700441 | 0.797155402 |
| pcaac401.smc202                 | -0.024574815 | 0.095456059 | 0.797220501 |
| c10.pcaac343                    | 0.005165276  | 0.020070082 | 0.79728551  |
| pcaac344.tryptophan             | 0.00105437   | 0.004097109 | 0.797298763 |
| smohc241.pcaac402               | -0.02421163  | 0.094088981 | 0.797312488 |
| asymmetricdimethylarginine.lysc | 0.005240887  | 0.020370419 | 0.797349197 |
| methioninesulfoxide.putrescine  | -0.017136036 | 0.066620052 | 0.797394559 |
| c2.lysine                       | -0.017457    | 0.067872692 | 0.797408647 |
| pcaac361.pcaac321               | 0.013765333  | 0.053519873 | 0.797409961 |
| pcaec341.pcaac360               | 0.009927819  | 0.03860552  | 0.79744062  |
| pcaac281.tryptophan             | 0.000480055  | 0.001866897 | 0.797456013 |
| creatinine.pcaec444             | 0.024577135  | 0.095626729 | 0.797555766 |
| c4.c141                         | 0.00924372   | 0.035970395 | 0.797578735 |
| kynurenine.transhydroxyproline  | -0.004851341 | 0.018880336 | 0.797601277 |
| pcaec421.pcaac426               | -0.031038652 | 0.120841453 | 0.79767656  |
| pcaec406.pcaac300               | -0.016520792 | 0.064330155 | 0.797708743 |
| lysine.c4                       | 0.00222847   | 0.008678926 | 0.797743163 |
| spermidine.c141                 | -0.037750987 | 0.147168189 | 0.797937276 |
| pcaec342.pcaec422               | -0.010095771 | 0.039364751 | 0.797974759 |
| pcaec362.pcaec386               | 0.003220719  | 0.012562153 | 0.798039948 |
| pcaac360.smohc222               | 0.002120467  | 0.008272833 | 0.798090593 |

|                                |              |             |             |
|--------------------------------|--------------|-------------|-------------|
| pcaec401.pcaac365              | 0.016347952  | 0.063785584 | 0.798107199 |
| pcaec385.pcaec380              | -0.014482739 | 0.056534735 | 0.798200617 |
| pcaec444.pcaec341              | 0.013057672  | 0.050982508 | 0.798241868 |
| arginine.smc260                | -0.0061564   | 0.024051505 | 0.798359996 |
| c16.pcaec341                   | -0.018476879 | 0.072194112 | 0.798386207 |
| pcaac344.c162                  | 0.017558714  | 0.068610415 | 0.798397187 |
| pcaec363.pcaec446              | -0.009136943 | 0.035721098 | 0.798500028 |
| acetylmethionine.c51           | 0.014033334  | 0.0548784   | 0.798552988 |
| pcaec361.c14                   | -0.023751932 | 0.092903883 | 0.798595797 |
| pcaec300.taurine               | 0.009202286  | 0.035996911 | 0.798611483 |
| glutamicacid.c4                | -0.007882387 | 0.030834106 | 0.798613347 |
| c14.pcaec422                   | -0.007967039 | 0.031168201 | 0.798632027 |
| leucine.pcaec446               | -0.012333651 | 0.048251243 | 0.798632966 |
| lysopcac182.methioninesulfoxid | -0.007974476 | 0.03120961  | 0.798709756 |
| pcaac381.arginine              | 0.019536962  | 0.076478932 | 0.79875445  |
| smohc222.smc261                | -0.013608711 | 0.053290702 | 0.798822295 |
| smc261.c2                      | -0.009675719 | 0.037898759 | 0.798870904 |
| pcaec364.pcaec362              | 0.007736402  | 0.030308393 | 0.798908106 |
| c141oh.c8                      | -0.017042852 | 0.066802033 | 0.799009352 |
| lysopcac161.threonine          | 0.006227659  | 0.024412312 | 0.799025959 |
| pcaac426.c162                  | -0.016424477 | 0.064397613 | 0.799068573 |
| lysopcac140.c141               | 0.011289635  | 0.044267476 | 0.799080622 |
| lysopcac281.pcaec301           | -0.02343283  | 0.091901664 | 0.799123067 |
| pcaec382.pcaac424              | 0.005278047  | 0.020702461 | 0.799145747 |
| pcaac404.c101                  | 0.001494937  | 0.005865739 | 0.799214116 |
| pcaac363.pcaec401              | -0.022453668 | 0.088160944 | 0.799344826 |
| c14.c0                         | -0.00026302  | 0.001032735 | 0.799350233 |
| pcaac422.pcaec383              | 0.018077012  | 0.070983694 | 0.799364273 |
| lysopcac181.smc161             | 0.025308185  | 0.099407824 | 0.799421947 |
| pcaac360.c3                    | 0.00685698   | 0.026933739 | 0.799423853 |
| c101.spermidine                | 0.017949993  | 0.07051707  | 0.799453758 |
| c51.phenylalanine              | -0.012669205 | 0.049771359 | 0.799453831 |
| pcaac240.c0                    | 0.001109813  | 0.004360518 | 0.799480145 |
| pcaec361.pcaac322              | -0.016915623 | 0.066467006 | 0.799493577 |
| creatinine.pcaec446            | -0.023715684 | 0.09319454  | 0.799510154 |
| c14.pcaec321                   | 0.0178842    | 0.070279521 | 0.799512176 |
| smohc241.smohc141              | 0.033269604  | 0.130790769 | 0.799589028 |
| smc181.pcaec446                | -0.006977967 | 0.027449434 | 0.799713179 |
| pcaec424.pcaec446              | 0.011411051  | 0.044890308 | 0.799723301 |
| pcaec340.lysine                | -0.018474398 | 0.072750106 | 0.799920131 |
| pcaec301.lysopcac161           | 0.024125858  | 0.095038926 | 0.799990184 |
| pcaac323.lysopcac140           | 0.000343003  | 0.001351231 | 0.799995826 |
| leucine.pcaec384               | 0.008845546  | 0.034848693 | 0.800009613 |

|                                |              |             |             |
|--------------------------------|--------------|-------------|-------------|
| pcaac384.pcaac381              | 0.008431155  | 0.033218273 | 0.800022284 |
| pcaec383.c14                   | 0.019475392  | 0.076749489 | 0.800067028 |
| phenylalanine.pcaac323         | 0.027525707  | 0.108507648 | 0.800126746 |
| pcaec321.pcaac384              | 0.004791492  | 0.018888315 | 0.800127015 |
| pcaac383.tryptophan            | 0.000875007  | 0.003452317 | 0.800296621 |
| pcaac420.c5                    | -0.002795716 | 0.011031134 | 0.80030916  |
| citruline.pcaac384             | -0.002525992 | 0.009967352 | 0.800318526 |
| pcaec423.arginine              | 0.013565266  | 0.05353493  | 0.80034599  |
| prolinr.lysopcac182            | -0.006197117 | 0.024469966 | 0.800451559 |
| smc202.pcaec420                | -0.008666938 | 0.034227758 | 0.800482647 |
| prolinr.pcaac384               | 0.015145003  | 0.059824605 | 0.800526557 |
| pcaec402.pcaac341              | -0.012163442 | 0.048052689 | 0.800549359 |
| lysopcac140.pcaac406           | 0.013836013  | 0.054673955 | 0.800598049 |
| c102.methioninesulfoxide       | -0.004710805 | 0.018622339 | 0.800674224 |
| pcaac402.leucine               | 0.004234475  | 0.016742281 | 0.800708359 |
| c102.c8                        | -0.010135821 | 0.040088341 | 0.800773055 |
| pcaac343.pcaac421              | 0.007080879  | 0.028017608 | 0.800855983 |
| pcaec363.pcaac402              | -0.011070533 | 0.043812854 | 0.800895974 |
| lysine.putrescine              | 0.015385668  | 0.060904781 | 0.800941745 |
| c182.pcaac406                  | 0.007111197  | 0.028153771 | 0.800946973 |
| alphaaminoadipicacid.ornithine | -0.009657875 | 0.038258274 | 0.801080215 |
| pcaac381.lysopcac140           | -0.000409644 | 0.001623896 | 0.801218379 |
| pcaec403.pcaac445              | -0.020239553 | 0.08023499  | 0.801223217 |
| smc161.tryptophan              | 0.000685531  | 0.002717754 | 0.801232187 |
| c16.pcaac425                   | -0.022362379 | 0.08878043  | 0.801508113 |
| pcaac321.pcaac422              | -0.00508453  | 0.020189062 | 0.801537669 |
| pcaec342.pcaac343              | -0.006605738 | 0.026230732 | 0.801548289 |
| smc161.c51dc                   | -0.028086631 | 0.111539555 | 0.801566277 |
| smc261.pcaec360                | -0.001361088 | 0.005407264 | 0.80163876  |
| pcaac386.methionine            | -0.008635786 | 0.034319901 | 0.801707078 |
| c141oh.pcaac321                | 0.005536231  | 0.022020641 | 0.801873095 |
| h1.pcaac344                    | -0.021851026 | 0.086921982 | 0.801891864 |
| pcaec301.serine                | -0.010978927 | 0.043699822 | 0.802008831 |
| pcaec360.pcaac384              | 0.005195397  | 0.020683893 | 0.802050662 |
| lysopcac182.pcaac364           | 0.01281975   | 0.051051998 | 0.802104048 |
| arginine.pcaac445              | 0.010895074  | 0.043389179 | 0.802112108 |
| pcaac384.c101                  | 0.001415835  | 0.005640084 | 0.802166361 |
| pcaec363.phenylalanine         | 0.011409467  | 0.045459592 | 0.802205288 |
| pcaec341.prolinr               | 0.011287834  | 0.044989448 | 0.802267651 |
| c102.c4                        | -0.009965834 | 0.039740457 | 0.802365329 |
| pcaac420.pcaec402              | 0.016289154  | 0.064964082 | 0.802390079 |
| c101.lysopcac140               | 0.000493206  | 0.001967235 | 0.802413528 |
| pcaac426.pcaac343              | 0.021113913  | 0.084216557 | 0.80241412  |

|                                |              |             |             |
|--------------------------------|--------------|-------------|-------------|
| pcaec341.pcaac386              | 0.003945859  | 0.015741462 | 0.802447409 |
| pcaac341.pcaac240              | 0.004758563  | 0.019005078 | 0.802665662 |
| pcaac240.pcaec341              | -0.010281012 | 0.041074249 | 0.80272793  |
| pcaec341.pcaac405              | 0.019002828  | 0.075929823 | 0.802754784 |
| pcaac320.pcaec362              | 0.006338388  | 0.025334837 | 0.802819321 |
| pcaac420.pcaec445              | -0.023792293 | 0.095125943 | 0.802874156 |
| asparticacid.pcaac341          | -0.00262538  | 0.010497738 | 0.80289231  |
| pcaac320.pcaac425              | -0.029618552 | 0.11849771  | 0.803000103 |
| c101.pcaac444                  | -0.025625336 | 0.102528957 | 0.803013799 |
| pcaac300.tryptophan            | 0.000389097  | 0.00155729  | 0.803073783 |
| pcaac323.histidine             | 0.014336835  | 0.057394031 | 0.803118793 |
| pcaec380.pcaac422              | 0.026885468  | 0.10765892  | 0.80317161  |
| pcaec383.pcaec402              | 0.025168067  | 0.100834716 | 0.803272683 |
| pcaac401.pcaac322              | 0.016848346  | 0.067510107 | 0.803295439 |
| c141oh.spermidine              | 0.018893402  | 0.075785206 | 0.803500586 |
| smc261.pcaec445                | 0.034521574  | 0.138488447 | 0.803522154 |
| smohc221.pcaac360              | 0.012927564  | 0.051864467 | 0.803535567 |
| pcaac342.pcaac361              | -0.013664189 | 0.054821874 | 0.803543009 |
| pcaec443.pcaac320              | 0.021507755  | 0.086335984 | 0.803643433 |
| alphaaminoadipicacid.pcaac380  | 0.010952927  | 0.043981008 | 0.803704617 |
| pcaac322.pcaec420              | -0.01010734  | 0.04059341  | 0.803741654 |
| pcaac240.pcaac386              | -0.008000328 | 0.03213755  | 0.803779849 |
| pcaac363.c3                    | -0.007839348 | 0.031494145 | 0.803799733 |
| pcaec380.smc241                | -0.004384783 | 0.017619881 | 0.803846174 |
| pcaec342.isoleucine            | 0.006970059  | 0.028012876 | 0.803875535 |
| c51dc.c162                     | 0.025343634  | 0.101868577 | 0.803897693 |
| pcaec341.putrescine            | -0.007988093 | 0.032113416 | 0.803929546 |
| pcaec341.c141                  | 0.007046367  | 0.028345274 | 0.804049782 |
| creatinine.pcaac343            | -0.014509723 | 0.058373278 | 0.804067265 |
| c18.lysopcac140                | 0.000409892  | 0.001649643 | 0.804140131 |
| pcaec361.pcaac321              | 0.009479359  | 0.038162743 | 0.80420228  |
| c14.pcaac425                   | 0.011237737  | 0.045256159 | 0.804263312 |
| smc160.pcaec420                | -0.004716342 | 0.018993522 | 0.804263918 |
| histidine.smc202               | -0.013461144 | 0.054227942 | 0.804326132 |
| asymmetricdimethylarginine.pca | 0.013146072  | 0.052960429 | 0.804332457 |
| pcaec363.pcaac403              | 0.013357734  | 0.053814217 | 0.804336318 |
| pcaec364.threonine             | -0.008534317 | 0.034383255 | 0.804342494 |
| glycine.acetylmithoine         | 0.012704704  | 0.051191339 | 0.804366188 |
| c51.pcaac406                   | 0.011891148  | 0.04791944  | 0.804390903 |
| pcaac404.smc160                | 0.026613967  | 0.107290526 | 0.804463154 |
| pcaac381.pcaec446              | 0.01731119   | 0.069798489 | 0.804492855 |
| pcaac281.lysopcac161           | 0.020005281  | 0.080689649 | 0.80456078  |
| pcaac402.asymmetricdimethylar; | -0.009187403 | 0.037074037 | 0.804650665 |

|                                 |              |             |             |
|---------------------------------|--------------|-------------|-------------|
| c182.pcaac342                   | -0.011496658 | 0.04640299  | 0.804693497 |
| pcaec443.smc261                 | -0.015284007 | 0.061702115 | 0.804732467 |
| pcaac381.c8                     | 0.011114296  | 0.04486942  | 0.804734967 |
| pcaec383.c51dc                  | -0.041050758 | 0.165749785 | 0.804762841 |
| lysopcac160.pcaac385            | -0.00842942  | 0.034035943 | 0.804766502 |
| pcaec340.pcaec445               | -0.013927278 | 0.056247624 | 0.804809583 |
| pcaac341.pcaac403               | 0.001691564  | 0.006831824 | 0.804814077 |
| serotonin.pcaac404              | -0.001185511 | 0.004788344 | 0.804827998 |
| serotonin.asymmetricdimethylar; | 0.00862552   | 0.034842264 | 0.804846184 |
| serine.pcaec445                 | -0.012965155 | 0.052415931 | 0.805006576 |
| histidine.lysopcac140           | -0.000836291 | 0.003381236 | 0.805020747 |
| pcaec301.pcaec386               | 0.001538681  | 0.006222008 | 0.805048947 |
| methioninesulfoxide.pcaac406    | -0.026190338 | 0.105914501 | 0.805063189 |
| pcaec421.c16                    | 0.004589373  | 0.018564512 | 0.805114106 |
| lysopcac182.c141oh              | 0.027300477  | 0.110473193 | 0.805182911 |
| histidine.arginine              | -0.007042991 | 0.028503047 | 0.80520377  |
| pcaec360.smohc161               | 0.0206309    | 0.083509282 | 0.805239986 |
| pcaac424.pcaac343               | 0.003923322  | 0.01588398  | 0.805278981 |
| kynurenine.lysopcac281          | -0.002048632 | 0.008294734 | 0.805293521 |
| putrescine.pcaac384             | -0.025779002 | 0.104410692 | 0.805355193 |
| c10.ornithine                   | 0.008755158  | 0.035463626 | 0.805372878 |
| pcaec405.c162                   | -0.019120347 | 0.077459949 | 0.805400226 |
| pcaec401.smc260                 | -0.008863201 | 0.035909493 | 0.805416567 |
| c101.putrescine                 | 0.009638993  | 0.039055026 | 0.805428247 |
| pcaac362.pcaac364               | 0.006737507  | 0.027310707 | 0.805510945 |
| pcaac384.pcaac342               | 0.025571315  | 0.103741342 | 0.805671061 |
| pcaec444.smc160                 | -0.018598572 | 0.075495172 | 0.805776589 |
| pcaac281.pcaec322               | 0.020960314  | 0.085112896 | 0.805845813 |
| pcaac406.pcaac380               | 0.016974967  | 0.068950391 | 0.805902847 |
| asymmetricdimethylarginine.smc  | 0.016174324  | 0.065749262 | 0.806050346 |
| pcaac341.tryptophan             | 0.000728304  | 0.002961174 | 0.806088155 |
| kynurenine.pcaac381             | -0.010661325 | 0.043355598 | 0.806124384 |
| pcaac384.pcaac322               | -0.012609034 | 0.051282249 | 0.80614681  |
| pcaec364.smc240                 | -0.005838862 | 0.023751394 | 0.806179905 |
| pcaac406.pcaac425               | -0.025574253 | 0.104074226 | 0.806258301 |
| c4.lysopcac140                  | -0.000926804 | 0.003771904 | 0.806272569 |
| smc261.pcaec321                 | -0.016143423 | 0.065723701 | 0.806339659 |
| pcaac422.pcaec385               | -0.01419174  | 0.057792968 | 0.806389021 |
| acetylornithoine.lysopcac161    | -0.008468321 | 0.034491525 | 0.806422098 |
| creatinine.pcaec402             | 0.011050997  | 0.045031713 | 0.806510281 |
| pcaec301.c8                     | 0.015804021  | 0.064416675 | 0.806559908 |
| lysopcac203.pcaac420            | -0.025537827 | 0.104113827 | 0.806600834 |
| smohc221.asymmetricdimethyla    | -0.014217341 | 0.057970891 | 0.806630122 |

|                              |              |             |             |
|------------------------------|--------------|-------------|-------------|
| pcaec322.c4                  | -0.004130644 | 0.016845458 | 0.806662188 |
| pcaac406.tryptophan          | 0.000495564  | 0.002021275 | 0.806688751 |
| pcaac421.pcaec386            | -0.004116221 | 0.016796733 | 0.806776027 |
| pcaec421.pcaec321            | -0.010456002 | 0.042691276 | 0.806883851 |
| lysine.arginine              | -0.007549804 | 0.030828109 | 0.806900302 |
| pcaec443.glycine             | 0.003829865  | 0.015638504 | 0.806900547 |
| pcaec360.pcaac363            | -0.004402099 | 0.017982813 | 0.806981591 |
| pcaec406.pcaec444            | 0.035805252  | 0.146292736 | 0.807015662 |
| pcaec380.taurine             | -0.016386002 | 0.066950375 | 0.807017398 |
| methionine.smc260            | -0.005474995 | 0.022377267 | 0.807079784 |
| pcaac421.pcaec363            | -0.007310624 | 0.029881512 | 0.807090596 |
| pcaec361.pcaac343            | 0.006020807  | 0.024613059 | 0.807117905 |
| pcaec445.lysopcac140         | 0.000753975  | 0.003085492 | 0.80731647  |
| leucine.c182                 | -0.0102612   | 0.041994777 | 0.807329465 |
| lysopcac182.pcaec403         | -0.012461685 | 0.051023069 | 0.807413223 |
| smc241.pcaec446              | -0.006641704 | 0.027197776 | 0.807441061 |
| c10.pcaec420                 | -0.005728762 | 0.023461066 | 0.807455442 |
| pcaec443.pcaac364            | -0.013478602 | 0.055209049 | 0.807489537 |
| alanine.pcaac404             | -0.001552564 | 0.006360552 | 0.807524207 |
| lysopcac161.taurine          | 0.009027329  | 0.03699027  | 0.807560243 |
| pcaec424.pcaec385            | 0.018115256  | 0.07424231  | 0.807594467 |
| pcaac383.c4                  | -0.005855748 | 0.024005143 | 0.80764438  |
| lysopcac203.pcaac281         | -0.000965637 | 0.003959867 | 0.80770725  |
| pcaec341.creatinine          | -0.001089008 | 0.004467816 | 0.807792853 |
| pcaac426.tryptophan          | 0.000862536  | 0.003539314 | 0.807826641 |
| kynurenine.smc261            | 0.009941659  | 0.040801181 | 0.807857823 |
| pcaac401.pcaac402            | -0.053995357 | 0.221606349 | 0.807862989 |
| pcaac425.pcaac403            | -0.005427925 | 0.022279287 | 0.807881044 |
| pcaec361.threonine           | -0.007777145 | 0.031930373 | 0.807931493 |
| smohc141.transhydroxyproline | 0.006304943  | 0.025888224 | 0.807947681 |
| smohc141.pcaec402            | -0.014890227 | 0.061142356 | 0.807956232 |
| smc160.pcaac426              | 0.012946609  | 0.053175944 | 0.808007521 |
| c141oh.pcaac380              | -0.016225575 | 0.066650497 | 0.808026634 |
| pcaec382.lysine              | -0.02989313  | 0.122796819 | 0.808032023 |
| smc202.lysopcac140           | 0.000340548  | 0.00139971  | 0.808137921 |
| pcaec403.smc160              | -0.015611408 | 0.06416751  | 0.80814352  |
| pcaac405.pcaac383            | 0.001400146  | 0.005755923 | 0.808173146 |
| alanine.smc260               | 0.006249431  | 0.025693493 | 0.808190952 |
| c142.pcaec364                | 0.00703929   | 0.028946367 | 0.80822668  |
| c8.pcaac401                  | -0.000586539 | 0.002413455 | 0.808346465 |
| pcaac386.pcaac384            | -0.012734753 | 0.052427614 | 0.8084449   |
| c182.smc260                  | 0.004528707  | 0.018645745 | 0.808460422 |
| citruline.alanine            | 0.005287619  | 0.021777165 | 0.808519075 |

|                                |              |             |             |
|--------------------------------|--------------|-------------|-------------|
| putrescine.smc241              | -0.002440325 | 0.01005432  | 0.808589914 |
| pcaec443.pcaac343              | 0.003379332  | 0.013924791 | 0.808612713 |
| asymmetricdimethylarginine.pca | 0.030252363  | 0.124657714 | 0.808613587 |
| c0.pcaac383                    | -0.00239313  | 0.009861186 | 0.80861491  |
| pcaec322.pcaec403              | 0.003281788  | 0.013524046 | 0.808629256 |
| pcaec385.smc260                | 0.007735294  | 0.031879308 | 0.808644786 |
| smc260.pcaec340                | -0.016906585 | 0.069676919 | 0.808645202 |
| lysopcac161.methioninesulfoxid | 0.011245883  | 0.046351242 | 0.808660223 |
| lysopcac203.pcaec301           | -0.013520357 | 0.055732027 | 0.808681331 |
| alphaaminoadipicacid.c12       | 0.011450536  | 0.047204525 | 0.808699091 |
| smohc161.smohc141              | 0.056577505  | 0.23327923  | 0.80873125  |
| asparticacid.prolinr           | 0.01013523   | 0.041804825 | 0.808800546 |
| leucine.smc261                 | -0.016717613 | 0.068960872 | 0.808815948 |
| pcaec424.lysine                | 0.023473627  | 0.096839325 | 0.808834535 |
| c14.leucine                    | -0.001827242 | 0.00753902  | 0.808854925 |
| pcaec321.pcaec322              | -0.040298383 | 0.166278868 | 0.808868145 |
| lysopcac170.pcaac364           | -0.012410086 | 0.051207988 | 0.808873957 |
| pcaac362.smc260                | -0.009802976 | 0.040457269 | 0.808906635 |
| citruline.smc160               | -0.015348515 | 0.063382912 | 0.809021868 |
| serotonin.pcaec363             | -0.005916678 | 0.02444546  | 0.80911432  |
| pcaec446.pcaec341              | 0.013917664  | 0.057515248 | 0.809155826 |
| pcaec383.c4                    | -0.006592396 | 0.027253395 | 0.809225059 |
| methioninesulfoxide.leucine    | 0.008349805  | 0.034553722 | 0.80941497  |
| c141.pcaac402                  | 0.004814745  | 0.019932231 | 0.809485595 |
| c101.pcaec445                  | 0.009356829  | 0.038767404 | 0.809638408 |
| pcaac385.lysopcac180           | -0.016600387 | 0.06878842  | 0.809663802 |
| pcaec406.lysopcac204           | 0.023157527  | 0.095986581 | 0.8097159   |
| pcaec380.pcaac363              | 0.007460574  | 0.030939874 | 0.809813805 |
| smohc141.pcaac426              | 0.013167341  | 0.054609919 | 0.809825467 |
| c181.lysopcac280               | 0.006414894  | 0.026606923 | 0.809839079 |
| pcaac380.pcaec341              | -0.010755279 | 0.044610791 | 0.8098447   |
| lysopcac280.lysopcac204        | -0.0100685   | 0.041762646 | 0.809846856 |
| pcaac424.pcaac323              | -0.020553933 | 0.085297097 | 0.809939608 |
| smohc141.pcaac363              | -0.001359351 | 0.005641359 | 0.809945058 |
| pcaec405.pcaac320              | 0.023264283  | 0.096547938 | 0.809945619 |
| pcaec383.pcaec321              | 0.009198359  | 0.038182215 | 0.809987434 |
| pcaac421.pcaac424              | 0.003403548  | 0.014134783 | 0.810076037 |
| lysopcac203.pcaec321           | -0.003789199 | 0.015738409 | 0.810100077 |
| pcaec381.pcaac344              | -0.020013207 | 0.083141851 | 0.810138508 |
| lysopcac182.pcaac425           | 0.018556621  | 0.077093572 | 0.810145481 |
| pcaac425.c8                    | -0.013514665 | 0.056148224 | 0.810150402 |
| pcaac380.lysopcac204           | 0.008789849  | 0.036533866 | 0.810229031 |
| pcaac362.tryptophan            | 0.000932683  | 0.003877573 | 0.810277001 |

|                                |              |             |             |
|--------------------------------|--------------|-------------|-------------|
| pcaec386.arginine              | 0.012431088  | 0.05169199  | 0.81031468  |
| smohc241.pcaac401              | -0.002321745 | 0.009654696 | 0.810318932 |
| leucine.pcaac343               | -0.006534854 | 0.027176395 | 0.810332603 |
| pcaac343.isoleucine            | -0.005393618 | 0.022433037 | 0.810354839 |
| c182.lysopcac140               | 0.000280063  | 0.001164902 | 0.81036618  |
| glutamicacid.tyrosine          | 0.018181291  | 0.075640233 | 0.810406341 |
| methioninesulfoxide.lysopcac28 | -0.004637759 | 0.01929486  | 0.810408626 |
| pcaec403.c162                  | -0.025033095 | 0.104152686 | 0.810418236 |
| glycine.pcaec321               | -0.002959487 | 0.012315598 | 0.810453816 |
| c0.lysopcac140                 | -0.001044777 | 0.004348704 | 0.81049535  |
| methioninesulfoxide.tyrosine   | 0.01680653   | 0.069956722 | 0.810501904 |
| c142.pcaec301                  | 0.016513121  | 0.068748448 | 0.810537139 |
| smc181.pcaec420                | -0.004564748 | 0.019005484 | 0.810549309 |
| pcaac426.taurine               | 0.00455587   | 0.018970311 | 0.810566848 |
| pcaac404.pcaec403              | -0.017539016 | 0.073031777 | 0.810568331 |
| pcaec365.c101                  | -0.003328717 | 0.013864622 | 0.810621606 |
| c2.c8                          | -0.01395243  | 0.05811447  | 0.810622997 |
| h1.c8                          | -0.00452372  | 0.018845327 | 0.810654421 |
| pcaec364.c141                  | -0.013987478 | 0.058307665 | 0.810773401 |
| pcaac403.leucine               | 0.004237715  | 0.017668573 | 0.810809078 |
| pcaec404.smc161                | -0.01960432  | 0.081739409 | 0.81081334  |
| arginine.histidine             | 0.017266647  | 0.072016164 | 0.810874112 |
| pcaac300.pcaec343              | 0.021615593  | 0.090181654 | 0.810929237 |
| h1.pcaec360                    | -0.001855548 | 0.007745086 | 0.811015879 |
| pcaac384.pcaac323              | 0.020674804  | 0.086316638 | 0.811058187 |
| pcaac322.valine                | 0.017277818  | 0.072141551 | 0.811076737 |
| smc241.pcaac404                | -0.001148065 | 0.004798578 | 0.811268368 |
| c51dc.c4                       | -0.004281613 | 0.017896433 | 0.811273973 |
| pcaac380.smc241                | -0.005630907 | 0.023536862 | 0.81127873  |
| ornithine.c181                 | 0.011065528  | 0.046257334 | 0.811295026 |
| pcaac300.glycine               | 0.010473802  | 0.043788203 | 0.811313921 |
| pcaac363.tyrosine              | 0.018108323  | 0.075709849 | 0.811323033 |
| glycine.pcaac421               | -0.003842695 | 0.01606698  | 0.811333338 |
| pcaac381.pcaac401              | -0.001539873 | 0.006438648 | 0.811338176 |
| c14.arginine                   | 0.008606179  | 0.035988739 | 0.81135801  |
| pcaac364.c101                  | -0.000990964 | 0.004144425 | 0.811379276 |
| pcaac420.pcaac323              | 0.024252837  | 0.101431289 | 0.811380662 |
| c181.pcaac363                  | 0.002356826  | 0.009860426 | 0.811448269 |
| pcaec382.smc261                | -0.020094203 | 0.084075612 | 0.811461532 |
| pcaac424.c0                    | -0.00032271  | 0.001350503 | 0.811497215 |
| pcaac321.c0                    | 0.000241765  | 0.001011951 | 0.811532383 |
| serotonin.c182                 | -0.003075888 | 0.012875374 | 0.811542429 |
| isoleucine.c142                | 0.023685241  | 0.099158477 | 0.811569152 |



|                                |              |             |             |
|--------------------------------|--------------|-------------|-------------|
| pcaec343.pcaec322              | -0.024358287 | 0.101984772 | 0.811584712 |
| asparticacid.leucine           | 0.005910466  | 0.024755346 | 0.811652228 |
| c102.pcaac360                  | -0.007430126 | 0.031120849 | 0.811655626 |
| ornithine.lysopcac281          | -0.00265864  | 0.011143224 | 0.811781513 |
| methioninesulfoxide.smohc161   | 0.005912     | 0.024781734 | 0.811801094 |
| alanine.pcaec321               | -0.001672128 | 0.007010692 | 0.811841044 |
| pcaec301.c51                   | -0.013227842 | 0.055460629 | 0.811842965 |
| pcaec380.pcaec444              | -0.024730534 | 0.103742627 | 0.811939829 |
| c18.tryptophan                 | 0.000802945  | 0.003368935 | 0.811975107 |
| pcaac402.lysine                | 0.0226907    | 0.095231908 | 0.81202938  |
| smc240.c16                     | 0.007608669  | 0.031956098 | 0.812161169 |
| pcaec363.taurine               | -0.014455187 | 0.060714186 | 0.812170252 |
| pcaec423.c18                   | -0.009022817 | 0.037898868 | 0.812177741 |
| pcaec365.pcaec445              | 0.014639129  | 0.061526637 | 0.812289652 |
| creatinine.threonine           | 0.009695059  | 0.040754628 | 0.812322961 |
| methionine.smc241              | -0.004201654 | 0.017663495 | 0.812335613 |
| pcaec423.pcaec385              | -0.012740815 | 0.053581235 | 0.812403094 |
| c18.smc202                     | 0.011839411  | 0.049824461 | 0.81252893  |
| pcaec446.pcaac363              | -0.002168173 | 0.009124992 | 0.812539971 |
| pcaac361.pcaac404              | -0.00114588  | 0.00482525  | 0.812642558 |
| c162.c51dc                     | -0.026583863 | 0.111977264 | 0.812697951 |
| methioninesulfoxide.c141oh     | 0.031136601  | 0.131167701 | 0.812716549 |
| pcaec341.pcaac424              | 0.007758242  | 0.032690764 | 0.812761409 |
| c141.serotonin                 | 0.010171356  | 0.042866128 | 0.812792573 |
| pcaac384.pcaec403              | -0.017964824 | 0.075760892 | 0.812913803 |
| c16.pcaac365                   | -0.011826044 | 0.049880173 | 0.812941853 |
| arginine.pcaac406              | 0.012084129  | 0.050997045 | 0.813043759 |
| pcaac403.lysopcac140           | -0.000543326 | 0.002293083 | 0.813056416 |
| lysopcac161.pcaec420           | 0.013249262  | 0.055926739 | 0.813085225 |
| pcaac424.prolinr               | -0.006078832 | 0.025659596 | 0.813086014 |
| c12.asymmetricdimethylarginine | 0.003367804  | 0.014221052 | 0.81315159  |
| pcaac401.pcaac426              | -0.026376063 | 0.111426177 | 0.813232753 |
| c101.pcaac321                  | -0.004676892 | 0.019759348 | 0.813248785 |
| pcaac401.c8                    | -0.013099235 | 0.055347687 | 0.813264947 |
| c142.smc161                    | -0.013733232 | 0.058031435 | 0.813280559 |
| lysopcac182.pcaac344           | -0.012325252 | 0.052100425 | 0.813345905 |
| pcaac420.smc261                | 0.008861694  | 0.03746249  | 0.813360417 |
| pcaec384.pcaac424              | -0.006071585 | 0.025675021 | 0.813414745 |
| c162.pcaec341                  | 0.015945639  | 0.067435957 | 0.813431987 |
| pcaec404.pcaac300              | -0.016844108 | 0.071242634 | 0.813449836 |
| isoleucine.pcaec322            | 0.032283124  | 0.136574737 | 0.813493201 |
| pcaac321.pcaac363              | -0.005277737 | 0.022346189 | 0.813645233 |
| c16.pcaec361                   | -0.003413108 | 0.014454711 | 0.813688903 |

|                                |              |             |             |
|--------------------------------|--------------|-------------|-------------|
| c0.lysopcac281                 | -0.004016181 | 0.017009194 | 0.813693541 |
| pcaec443.leucine               | 0.002260211  | 0.009574243 | 0.813729309 |
| pcaec340.pcaac386              | 0.00331479   | 0.014051262 | 0.813857191 |
| pcaec341.lysine                | -0.014896849 | 0.063188665 | 0.813977246 |
| pcaac323.pcaac341              | -0.001252559 | 0.005313535 | 0.813994327 |
| c181.pcaac384                  | 0.016275886  | 0.069068495 | 0.81405735  |
| pcaac426.pcaac401              | -0.003353637 | 0.014240131 | 0.814167671 |
| pcaec420.pcaec422              | -0.011295719 | 0.047973986 | 0.81420714  |
| pcaec422.pcaec384              | -0.009433123 | 0.040080408 | 0.814284671 |
| leucine.pcaac424               | -0.003209371 | 0.013643598 | 0.81438215  |
| lysopcac160.pcaac321           | 0.007585186  | 0.032257046 | 0.814444844 |
| pcaec423.pcaac341              | -0.008481421 | 0.036072692 | 0.814466457 |
| smohc241.pcaac404              | -0.002801786 | 0.011916807 | 0.814472764 |
| glycine.c18                    | -0.01308061  | 0.055667366 | 0.8145766   |
| histidine.smc181               | 0.00847154   | 0.036062738 | 0.814628431 |
| smc241.pcaac402                | 0.011814531  | 0.050334619 | 0.814776668 |
| pcaac426.smc241                | -0.002699985 | 0.011503375 | 0.814782387 |
| pcaac363.c141                  | 0.007705236  | 0.032828474 | 0.814782734 |
| isoleucine.lysopcac280         | 0.002635168  | 0.011227915 | 0.814793617 |
| c51.asymmetricdimethylarginine | 0.004437974  | 0.018921467 | 0.814910499 |
| smc260.glycine                 | 0.0102747    | 0.04380788  | 0.814915952 |
| kynurenine.smc241              | -0.002483132 | 0.010588606 | 0.814939336 |
| pcaec422.pcaec423              | -0.030486577 | 0.130066354 | 0.815030221 |
| pcaac365.lysopcac161           | 0.026928374  | 0.114894468 | 0.815043883 |
| pcaac420.pcaac300              | 0.010371883  | 0.044296534 | 0.815220721 |
| lysopcac161.pcaec403           | -0.008278541 | 0.035375525 | 0.815319657 |
| pcaac300.pcaec342              | -0.023543602 | 0.100605624 | 0.815319774 |
| pcaec365.pcaec341              | -0.016563501 | 0.070786022 | 0.815338978 |
| smohc161.pcaac381              | -0.008763523 | 0.037452229 | 0.815340474 |
| pcaac341.lysopcac140           | -0.00030697  | 0.001311965 | 0.81535212  |
| smc240.pcaac424                | -0.002276279 | 0.009728777 | 0.815354551 |
| c18.pcaac320                   | -0.010210663 | 0.043641786 | 0.815361191 |
| smc180.lysine                  | 0.012545634  | 0.053648065 | 0.815450028 |
| pcaac403.pcaac343              | 0.00432295   | 0.018490999 | 0.815499563 |
| smc161.methionine              | -0.006241471 | 0.026702438 | 0.815534481 |
| pcaac362.pcaac383              | -0.001359903 | 0.005819064 | 0.815568433 |
| pcaec405.lysine                | 0.026663458  | 0.114205593 | 0.815745779 |
| methioninesulfoxide.c4         | -0.007061683 | 0.030255955 | 0.815800653 |
| c12.pcaac343                   | -0.004601398 | 0.019717249 | 0.815823072 |
| c101.pcaac420                  | -0.01769208  | 0.075812178 | 0.815824564 |
| pcaac426.pcaec341              | -0.013760821 | 0.058977583 | 0.815858934 |
| pcaac383.pcaec402              | 0.00849692   | 0.03643266  | 0.815936659 |
| c2.smc161                      | -0.021418407 | 0.091851608 | 0.815965884 |

|                               |              |             |             |
|-------------------------------|--------------|-------------|-------------|
| c162.smc241                   | -0.003452965 | 0.01481062  | 0.815999775 |
| c4.glycine                    | -0.007730236 | 0.033160656 | 0.816020287 |
| glutamicacid.c8               | 0.013939056  | 0.059845388 | 0.816172855 |
| c2.pcaac420                   | -0.021281073 | 0.091367848 | 0.816173925 |
| c16.smohc241                  | 0.025112986  | 0.107826804 | 0.816185767 |
| pcaec424.methioninesulfoxide  | 0.003530088  | 0.015161968 | 0.816244653 |
| phenylalanine.lysopcac170     | 0.004202908  | 0.018058516 | 0.816311964 |
| serine.lysopcac180            | 0.010984798  | 0.047204397 | 0.816336159 |
| pcaec382.asparticacid         | -0.019132851 | 0.082265366 | 0.816438688 |
| citruline.pcaec445            | -0.016481419 | 0.070883935 | 0.81648677  |
| c14.pcaac322                  | -0.009536575 | 0.041032458 | 0.816562232 |
| pcaec342.asparagine           | 0.002554152  | 0.010996231 | 0.816670858 |
| pcaec381.pcaac360             | -0.018606399 | 0.080123644 | 0.816712843 |
| pcaec443.spermidine           | 0.015629238  | 0.067303546 | 0.816713574 |
| pcaac424.c142                 | 0.010715557  | 0.046163481 | 0.816789689 |
| c10.isoleucine                | 0.004122526  | 0.01776683  | 0.816857083 |
| creatinine.pcaac380           | -0.013542469 | 0.058378748 | 0.816902801 |
| c4.pcaac361                   | -0.018509898 | 0.079820467 | 0.81696626  |
| alphaaminoadipicacid.pcaac404 | 0.004037263  | 0.017416305 | 0.817031965 |
| pcaac403.c162                 | -0.021244436 | 0.091653033 | 0.817045462 |
| kynurenine.pcaac424           | 0.002267852  | 0.009788958 | 0.817136467 |
| pcaac421.pcaac320             | -0.011037707 | 0.047662442 | 0.817209141 |
| pcaec421.serine               | -0.022639895 | 0.097764037 | 0.817212158 |
| pcaec340.pcaac341             | 0.04007847   | 0.17307115  | 0.817215805 |
| smohc141.lysopcac281          | -0.00618368  | 0.026706964 | 0.817242239 |
| pcaec406.pcaac360             | 0.012996193  | 0.056132795 | 0.817251752 |
| lysine.tryptophan             | -0.000763339 | 0.00329812  | 0.817313148 |
| c16.c162                      | -0.034305603 | 0.148229307 | 0.81732138  |
| pcaec403.prolinr              | -0.004057033 | 0.01753371  | 0.817361156 |
| pcaac424.glycine              | 0.004111054  | 0.017768594 | 0.817375439 |
| smc181.serotonin              | -0.020489164 | 0.088568193 | 0.817397597 |
| pcaec402.smc160               | -0.017503838 | 0.07566771  | 0.817407403 |
| pcaac300.lysopcac160          | -0.004507125 | 0.01948522  | 0.817419125 |
| pcaec340.pcaac384             | 0.01147897   | 0.049633818 | 0.817447646 |
| ornithine.pcaac343            | -0.003387563 | 0.014651633 | 0.817498774 |
| pcaec362.creatinine           | -0.001105437 | 0.004781353 | 0.817506236 |
| lysopcac140.smc160            | 0.018660443  | 0.080760426 | 0.817613492 |
| pcaac401.putrescine           | 0.016539877  | 0.071598379 | 0.817652374 |
| pcaac366.pcaac426             | 0.026720737  | 0.115683191 | 0.817673366 |
| glycine.c182                  | -0.015880028 | 0.068754939 | 0.817686068 |
| methioninesulfoxide.taurine   | -0.016530126 | 0.071588015 | 0.817732047 |
| c182.smc161                   | 0.014090018  | 0.061028398 | 0.817755239 |
| pcaac422.lysopcac180          | -0.018522183 | 0.080268012 | 0.817849979 |

|                                 |              |             |             |
|---------------------------------|--------------|-------------|-------------|
| smohc141.arginine               | -0.00877741  | 0.038041898 | 0.817868715 |
| smc180.pcaac343                 | 0.005227008  | 0.022663881 | 0.817945027 |
| lysopcac161.pcaec443            | 0.022599409  | 0.098017608 | 0.81799687  |
| pcaac381.pcaac422               | 0.01292482   | 0.056083783 | 0.818081559 |
| pcaac405.threonine              | -0.006136344 | 0.026632302 | 0.818117018 |
| pcaec401.pcaec385               | 0.011068553  | 0.04804859  | 0.818154378 |
| pcaec444.smc181                 | -0.004918636 | 0.021359062 | 0.818215115 |
| c14.pcaac300                    | 0.009575282  | 0.041592005 | 0.818264771 |
| asymmetricdimethylarginine.thre | 0.007299998  | 0.031711054 | 0.818276953 |
| c0.tyrosine                     | -0.009827359 | 0.042691345 | 0.818283166 |
| c14.c18                         | -0.016406394 | 0.071300924 | 0.818356723 |
| pcaec322.pcaac343               | -0.010946503 | 0.047582905 | 0.818395149 |
| pcaec384.pcaac323               | 0.030157367  | 0.131156138 | 0.818485354 |
| pcaac425.threonine              | -0.004696163 | 0.020428096 | 0.818522094 |
| pcaec365.c5                     | 0.001979423  | 0.008614359 | 0.818604047 |
| pcaac421.acetylnithoine         | -0.021505391 | 0.093612562 | 0.818646069 |
| c3.pcaec446                     | 0.022345814  | 0.097284555 | 0.818671058 |
| pcaec386.c4                     | -0.005765059 | 0.025104094 | 0.818709247 |
| serotonin.tryptophan            | -0.001112899 | 0.004847414 | 0.818755755 |
| prolinr.pcaac344                | -0.021337969 | 0.092955177 | 0.818782918 |
| pcaec382.pcaac386               | 0.009067186  | 0.039519149 | 0.818870861 |
| lysopcac181.pcaec341            | 0.011120766  | 0.048488226 | 0.818939079 |
| pcaec443.pcaec363               | 0.008503417  | 0.037076894 | 0.818942476 |
| pcaac343.arginine               | 0.012337672  | 0.053804228 | 0.818972497 |
| c8.pcaec384                     | 0.005516981  | 0.024074284 | 0.819082508 |
| lysopcac160.phenylalanine       | -0.013871756 | 0.060534171 | 0.819089566 |
| lysopcac182.pcaec444            | -0.019560305 | 0.085465861 | 0.819313679 |
| histidine.c102                  | 0.010816491  | 0.047266107 | 0.819332636 |
| lysopcac160.pcaac343            | -0.007857037 | 0.03436251  | 0.819480801 |
| lysopcac180.pcaac365            | -0.014944326 | 0.065369018 | 0.819509212 |
| serotonin.c101                  | -0.00161766  | 0.007077643 | 0.819552336 |
| pcaec386.pcaec384               | -0.022197209 | 0.097206957 | 0.819714635 |
| c102.pcaec423                   | -0.014380408 | 0.062980228 | 0.819728528 |
| lysopcac204.c10                 | -0.003202087 | 0.014027712 | 0.819777735 |
| pcaec404.smohc221               | 0.027976729  | 0.122593708 | 0.819825664 |
| pcaac381.lysopcac280            | 0.001785499  | 0.007824421 | 0.819834386 |
| pcaec422.c141                   | 0.012063483  | 0.052897211 | 0.819943369 |
| pcaac426.pcaac240               | 0.003775846  | 0.016561862 | 0.819998264 |
| lysopcac170.methionine          | 0.008858876  | 0.03885802  | 0.820001201 |
| lysopcac160.pcaac386            | -0.005770297 | 0.025317952 | 0.820053475 |
| lysopcac204.pcaec321            | 0.00487296   | 0.021389858 | 0.820128643 |
| alphaaminoadipicacid.pcaec342   | -0.015697326 | 0.068930596 | 0.820198351 |
| smc180.lysopcac140              | 0.000215208  | 0.00094529  | 0.820247235 |

|                                  |              |             |             |
|----------------------------------|--------------|-------------|-------------|
| smohc241.pcaac323                | -0.022509871 | 0.098891531 | 0.820279596 |
| smc160.c102                      | 0.005975781  | 0.026253146 | 0.820279847 |
| smohc241.pcaac343                | 0.006120582  | 0.026902256 | 0.820364947 |
| pcaec301.smc181                  | 0.007249296  | 0.031882992 | 0.820473552 |
| c3.smc161                        | 0.018970127  | 0.083451811 | 0.82051509  |
| pcaac380.pcaac425                | 0.025806584  | 0.113582415 | 0.820602415 |
| pcaac300.c3                      | 0.018243767  | 0.080308562 | 0.820629511 |
| pcaac424.lysopcac170             | 0.002464433  | 0.010853756 | 0.820717057 |
| pcaec342.pcaec403                | 0.010100688  | 0.044490527 | 0.820738784 |
| c51dc.lysopcac160                | 0.004710431  | 0.020756198 | 0.82080795  |
| smc161.pcaec301                  | 0.013931515  | 0.061390659 | 0.820814765 |
| pcaac361.lysopcac180             | -0.018252192 | 0.080438855 | 0.820833785 |
| alphaaminoadipicacid.asparticaci | -0.005204725 | 0.022945333 | 0.820892872 |
| lysopcac203.lysopcac140          | 0.000803455  | 0.00354243  | 0.820910353 |
| pcaac344.creatinine              | -0.007197611 | 0.03174268  | 0.820957142 |
| pcaac425.c16                     | 0.007598168  | 0.033509356 | 0.820957944 |
| pcaac364.threonine               | 0.006636111  | 0.029271502 | 0.820987999 |
| methioninesulfoxide.pcaec301     | -0.014270193 | 0.062979086 | 0.821083238 |
| c4.c10                           | -0.005250126 | 0.023171181 | 0.821088079 |
| pcaac341.smc160                  | -0.019098069 | 0.084368296 | 0.821254568 |
| asparticacid.glutamicacid        | 0.03059801   | 0.135218126 | 0.821316014 |
| pcaec385.c4                      | -0.011152495 | 0.049304492 | 0.821385847 |
| pcaac402.pcaec420                | -0.011043463 | 0.048833614 | 0.82142593  |
| asymmetricdimethylarginine.pca   | -0.002267855 | 0.01002852  | 0.821429139 |
| pcaec364.pcaac421                | -0.011943372 | 0.052829028 | 0.821479295 |
| pcaac322.c16                     | 0.009818532  | 0.043439161 | 0.821515343 |
| c4.c102                          | 0.013063507  | 0.057803227 | 0.821538533 |
| leucine.pcaac364                 | 0.008005127  | 0.035426386 | 0.821565332 |
| pcaac300.pcaec403                | 0.00251708   | 0.011148799 | 0.821715688 |
| pcaec384.pcaec403                | -0.010222951 | 0.04528632  | 0.821739764 |
| smc260.pcaec420                  | 0.003945152  | 0.017483259 | 0.821807482 |
| lysopcac180.c4                   | -0.006173001 | 0.027363042 | 0.821851619 |
| pcaac401.ornithine               | -0.009150387 | 0.04058573  | 0.821958793 |
| isoleucine.spermidine            | -0.016295404 | 0.072321737 | 0.822067496 |
| pcaec401.c162                    | -0.018633369 | 0.082715907 | 0.822105319 |
| c10.pcaac364                     | 0.012621797  | 0.056058504 | 0.822194972 |
| prolinr.smc160                   | -0.016983858 | 0.075446079 | 0.822227163 |
| c2.asparagine                    | -0.007440526 | 0.03306624  | 0.822299942 |
| smohc221.pcaec386                | 0.004562253  | 0.020277742 | 0.822323666 |
| pcaac300.pcaec364                | -0.003824703 | 0.017009278 | 0.822423366 |
| pcaac426.pcaec384                | -0.004326434 | 0.01924115  | 0.822428517 |
| smc260.lysopcac140               | 0.000625089  | 0.002780703 | 0.822473563 |
| serotonin.pcaac364               | 0.011687568  | 0.052002997 | 0.822510209 |

|                               |              |             |             |
|-------------------------------|--------------|-------------|-------------|
| pcaac300.pcaac360             | 0.007705682  | 0.034296602 | 0.822564774 |
| c14.pcaac363                  | 0.001381594  | 0.00614944  | 0.822570856 |
| pcaec301.spermidine           | -0.015473226 | 0.068887268 | 0.822612193 |
| pcaec365.pcaec403             | -0.006607872 | 0.029422634 | 0.822637023 |
| pcaac383.glycine              | -0.014075728 | 0.062687398 | 0.822672937 |
| citruline.pcaec421            | 0.00049074   | 0.002186499 | 0.822748398 |
| pcaec361.pcaac424             | 0.009148671  | 0.040785297 | 0.822847982 |
| c4.pcaac420                   | 0.011955014  | 0.053300843 | 0.822863369 |
| pcaac360.smc241               | -0.02476316  | 0.110422736 | 0.822890816 |
| serotonin.c3                  | -0.001979992 | 0.008829823 | 0.82290531  |
| pcaac365.c2                   | -0.014851397 | 0.0662315   | 0.822908791 |
| pcaec382.glycine              | 0.004899378  | 0.021857579 | 0.822974458 |
| lysopcac160.pcaec443          | -0.021208632 | 0.094634329 | 0.823004495 |
| pcaec421.pcaec384             | -0.006179408 | 0.027575762 | 0.82302236  |
| pcaec300.pcaac381             | -0.006901263 | 0.030797467 | 0.823024694 |
| pcaac342.pcaac300             | -0.017337774 | 0.077403088 | 0.823096205 |
| c3.pcaec301                   | -0.013595733 | 0.060708207 | 0.823128165 |
| pcaac426.pcaec385             | 0.01344082   | 0.060047415 | 0.823217754 |
| pcaac320.creatinine           | -0.001880419 | 0.008403294 | 0.823268341 |
| smc202.pcaec444               | -0.021063889 | 0.094133568 | 0.823272751 |
| c0.pcaec363                   | 0.002667062  | 0.011924041 | 0.823346506 |
| pcaec340.valine               | 0.017714686  | 0.079233572 | 0.823420669 |
| c12.smc240                    | -0.008045583 | 0.03598991  | 0.823439637 |
| pcaac321.lysopcac182          | -0.005362973 | 0.024002544 | 0.82353093  |
| pcaec422.smohe221             | 0.024657082  | 0.110392667 | 0.823589613 |
| pcaac321.pcaec406             | -0.01010375  | 0.045262981 | 0.823694241 |
| pcaec443.pcaac426             | -0.021073593 | 0.094512253 | 0.823889345 |
| pcaac344.isoleucine           | -0.009882682 | 0.04434372  | 0.823972184 |
| methionine.pcaec341           | 0.016844512  | 0.075592135 | 0.823996447 |
| pcaec360.c51                  | -0.033622609 | 0.150918534 | 0.824033505 |
| alphaaminoadipicacid.pcaac343 | -0.007496448 | 0.033681572 | 0.824203028 |
| arginine.c102                 | -0.010617995 | 0.047711676 | 0.824221082 |
| pcaec384.c2                   | -0.013819506 | 0.062167067 | 0.824414323 |
| c51dc.spermidine              | 0.016536084  | 0.074392745 | 0.824426265 |
| lysopcac203.pcaac402          | -0.012911329 | 0.05809299  | 0.824448081 |
| c12.pcaec301                  | -0.015921155 | 0.071701088 | 0.824606405 |
| pcaac404.pcaac424             | -0.001000372 | 0.004508113 | 0.824718372 |
| h1.pcaec444                   | 0.019817163  | 0.089322447 | 0.824752505 |
| pcaac300.pcaac424             | -0.002672356 | 0.012045453 | 0.824756341 |
| pcaac401.h1                   | 0.001457647  | 0.006570787 | 0.824770678 |
| pcaac323.pcaac321             | 0.005690447  | 0.025675058 | 0.824929409 |
| pcaec443.pcaec365             | 0.007811563  | 0.035277918 | 0.825087912 |
| c18.ornithine                 | -0.007216698 | 0.032603396 | 0.825151016 |

|                                |              |             |             |
|--------------------------------|--------------|-------------|-------------|
| c141oh.pcaac361                | 0.01198748   | 0.054165219 | 0.825178061 |
| pcaec340.pcaec361              | -0.003331807 | 0.015056528 | 0.825198781 |
| pcaac420.pcaac385              | -0.011924555 | 0.053893548 | 0.82521845  |
| pcaac344.pcaac401              | -0.00155013  | 0.007007136 | 0.825249217 |
| asparagine.creatinine          | 0.003194734  | 0.014449923 | 0.825351484 |
| pcaac321.pcaac403              | 0.001074223  | 0.004859017 | 0.825360706 |
| pcaec424.acetylmethionine      | 0.022070257  | 0.099838352 | 0.825374917 |
| pcaec405.pcaac360              | -0.015472352 | 0.069992853 | 0.825377821 |
| smc161.pcaec386                | 0.004391871  | 0.019886078 | 0.825536848 |
| lysopcac203.pcaac344           | -0.013962297 | 0.063221353 | 0.825539736 |
| pcaec380.pcaec361              | 0.007425879  | 0.033625518 | 0.82554534  |
| pcaac420.pcaec363              | -0.009179152 | 0.041604297 | 0.825709079 |
| c18.arginine                   | -0.013351366 | 0.060516781 | 0.825714789 |
| prolinr.spermidine             | 0.016859516  | 0.076419738 | 0.825718871 |
| pcaec380.tyrosine              | 0.017027416  | 0.077184262 | 0.825726596 |
| pcaec420.smohc241              | 0.015118881  | 0.068596571 | 0.825885517 |
| glutamicacid.smohc222          | -0.00195811  | 0.008888987 | 0.825977194 |
| pcaac421.lysopcac181           | -0.018425334 | 0.083699327 | 0.826092009 |
| pcaec365.taurine               | -0.008673475 | 0.039403689 | 0.826106639 |
| pcaac406.serine                | -0.02025903  | 0.092044476 | 0.826120568 |
| pcaac422.pcaac323              | -0.018713306 | 0.085056104 | 0.826189837 |
| glutamine.phenylalanine        | -0.009484145 | 0.043108227 | 0.826192587 |
| pcaec383.c141oh                | -0.024646228 | 0.112032881 | 0.826205614 |
| pcaec445.pcaec386              | 0.001301791  | 0.005917562 | 0.826208132 |
| c181.pcaac425                  | -0.012269864 | 0.055858055 | 0.826461746 |
| c0.c18                         | -0.013764637 | 0.062673287 | 0.826489921 |
| lysopcac203.methioninesulfoxid | -0.005091402 | 0.023185819 | 0.826516381 |
| pcaec341.lysopcac140           | 0.000213876  | 0.000973977 | 0.826517064 |
| pcaac424.pcaec322              | -0.014774703 | 0.067293949 | 0.826544759 |
| spermidine.leucine             | -0.013181636 | 0.060046833 | 0.826569726 |
| pcaac386.c2                    | 0.017519533  | 0.079812147 | 0.826579816 |
| smc202.asparagine              | -0.003856142 | 0.017579086 | 0.826696388 |
| smohc161.c0                    | 0.000178468  | 0.000813654 | 0.826710386 |
| pcaac421.pcaec420              | -0.00785236  | 0.035808929 | 0.826754432 |
| smc161.pcaac425                | 0.02071496   | 0.094526387 | 0.826863459 |
| leucine.pcaec365               | 0.006465261  | 0.0295054   | 0.82688169  |
| pcaac402.c0                    | -0.000391333 | 0.001787236 | 0.827007337 |
| pcaac402.lysopcac140           | -0.000635582 | 0.002902976 | 0.827021549 |
| lysopcac170.c4                 | 0.006341432  | 0.028966604 | 0.827036469 |
| c51dc.lysopcac180              | 0.017831822  | 0.081492923 | 0.827120298 |
| pcaac380.pcaec385              | -0.015433636 | 0.070561578 | 0.827189167 |
| c12.transhydroxyproline        | 0.006412516  | 0.029335247 | 0.827291448 |
| pcaec343.methioninesulfoxide   | 0.003460868  | 0.015834362 | 0.82731268  |

|                                |              |             |             |
|--------------------------------|--------------|-------------|-------------|
| pcaec421.pcaac364              | -0.011650528 | 0.053305176 | 0.827315893 |
| pcaac323.pcaac425              | 0.021435715  | 0.098112314 | 0.82737918  |
| pcaec444.lysopcac140           | 0.000333691  | 0.001527757 | 0.827427874 |
| lysopcac281.methioninesulfoxid | 0.003621048  | 0.016581698 | 0.827460984 |
| pcaac405.pcaec360              | 0.000680819  | 0.003118064 | 0.827483973 |
| c102.threonine                 | -0.007564977 | 0.034660461 | 0.827551658 |
| pcaec444.asymmetricdimethylar; | 0.004929495  | 0.022589251 | 0.82758007  |
| pcaec382.pcaac322              | 0.015097161  | 0.069184652 | 0.827585949 |
| pcaac384.pcaac424              | -0.002842126 | 0.013030649 | 0.827667274 |
| lysopcac204.pcaec382           | 0.002235689  | 0.010250258 | 0.82766756  |
| pcaac401.c51dc                 | 0.033600221  | 0.154062945 | 0.827680306 |
| pcaac320.pcaac344              | 0.020987313  | 0.096277854 | 0.827763653 |
| pcaac425.c3                    | -0.014043264 | 0.064425313 | 0.827771038 |
| pcaec381.pcaac421              | -0.004611224 | 0.021157313 | 0.827792825 |
| lysopcac161.histidine          | -0.021260063 | 0.09759755  | 0.82788258  |
| pcaec420.pcaec403              | -0.003758615 | 0.017257737 | 0.82791441  |
| c142.creatinine                | 0.005159101  | 0.023698259 | 0.827987087 |
| glutamine.c4                   | 0.002288286  | 0.010512679 | 0.828010722 |
| pcaac323.pcaec403              | 0.003618027  | 0.016627129 | 0.82806622  |
| c0.methioninesulfoxide         | 0.004187869  | 0.01924651  | 0.828071474 |
| pcaac300.pcaec321              | -0.004859363 | 0.022333295 | 0.828077157 |
| histidine.pcaec301             | -0.018098721 | 0.083201052 | 0.828119013 |
| pcaac420.pcaac363              | -0.002778698 | 0.012776409 | 0.828152701 |
| methioninesulfoxide.smc160     | -0.008297395 | 0.038159932 | 0.828191018 |
| pcaec401.pcaac344              | -0.010632196 | 0.048912479 | 0.828241972 |
| pcaac383.lysopcac161           | 0.016526183  | 0.076031341 | 0.828251077 |
| pcaec405.c4                    | -0.003983679 | 0.018332043 | 0.828292516 |
| lysopcac182.threonine          | -0.006568362 | 0.030232237 | 0.82832623  |
| lysopcac180.c51dc              | 0.028895787  | 0.133020456 | 0.82835373  |
| smohc141.leucine               | -0.002833488 | 0.013047453 | 0.828400592 |
| prolinr.lysopcac181            | 0.012054847  | 0.055514769 | 0.828417103 |
| alphaaminoadipicacid.pcaac421  | 0.002091387  | 0.009640127 | 0.828573201 |
| pcaec423.tyrosine              | -0.013551567 | 0.062504812 | 0.82868021  |
| pcaec361.smc161                | -0.022055919 | 0.101730517 | 0.828681045 |
| c8.pcaac360                    | -0.00778962  | 0.035942729 | 0.828746533 |
| c141oh.lysopcac180             | -0.010224845 | 0.047180467 | 0.828750697 |
| methioninesulfoxide.pcaec342   | 0.028385665  | 0.130995286 | 0.828770524 |
| pcaec402.asparticacid          | 0.011425383  | 0.052735979 | 0.828801433 |
| c162.spermidine                | 0.015317931  | 0.070741187 | 0.828892974 |
| pcaac420.pcaac365              | 0.015176437  | 0.070137048 | 0.829011389 |
| pcaec446.phenylalanine         | 0.010279561  | 0.047514334 | 0.829039451 |
| pcaec424.pcaec420              | -0.005390234 | 0.024921241 | 0.829082826 |
| h1.smc241                      | -0.004003708 | 0.018520423 | 0.829170546 |



|                                |              |             |             |
|--------------------------------|--------------|-------------|-------------|
| pcaac300.pcaec402              | -0.007153301 | 0.033090625 | 0.829174413 |
| pcaac240.smc241                | -0.005665156 | 0.026216942 | 0.829240861 |
| pcaec381.c5                    | -0.004346715 | 0.020126998 | 0.829336714 |
| c162.lysopcac181               | -0.015297235 | 0.070845007 | 0.829367072 |
| pcaac361.histidine             | -0.011792015 | 0.054643496 | 0.829465348 |
| smc181.pcaec386                | 0.004305506  | 0.019953927 | 0.829486112 |
| pcaac320.pcaec384              | 0.0045482    | 0.02108484  | 0.829535015 |
| serotonin.smc241               | 0.002923469  | 0.013553287 | 0.829540947 |
| putrescine.transhydroxyproline | 0.007438235  | 0.034484514 | 0.829544092 |
| c142.serotonin                 | 0.010854665  | 0.050343466 | 0.829610718 |
| pcaec382.pcaec446              | 0.016309283  | 0.075644133 | 0.829616012 |
| lysopcac203.smc160             | -0.029360924 | 0.13634127  | 0.829815677 |
| pcaec383.smc160                | 0.01597435   | 0.074179378 | 0.829816596 |
| pcaac426.pcaec301              | 0.021053591  | 0.097780157 | 0.829841496 |
| pcaec443.pcaec360              | -0.000893706 | 0.004153908 | 0.829971797 |
| pcaec382.c3                    | -0.013031394 | 0.060569897 | 0.829973146 |
| pcaec361.histidine             | -0.019712938 | 0.091673793 | 0.830060966 |
| pcaac366.pcaec363              | 0.006049628  | 0.028141695 | 0.830110157 |
| lysopcac281.asparticacid       | 0.01044469   | 0.048596067 | 0.830142515 |
| pcaec404.pcaac404              | -0.002655782 | 0.012356642 | 0.830143472 |
| pcaec380.spermidine            | -0.014746521 | 0.068634471 | 0.830199173 |
| pcaac381.pcaac323              | 0.020674026  | 0.096323064 | 0.83037328  |
| methioninesulfoxide.pcaec384   | -0.007938204 | 0.036995694 | 0.830420847 |
| pcaec382.threonine             | -0.007476563 | 0.034853361 | 0.830464576 |
| pcaac386.asparticacid          | -0.013016296 | 0.060679433 | 0.830468963 |
| pcaac403.smohc222              | 0.004892754  | 0.022813042 | 0.830498066 |
| pcaec385.pcaec422              | 0.008233373  | 0.038411374 | 0.830594963 |
| glutamicacid.pcaac364          | 0.019625864  | 0.091562058 | 0.830596783 |
| pcaec420.c142                  | 0.006624491  | 0.030921656 | 0.83068259  |
| lysopcac203.c4                 | 0.006164386  | 0.02877533  | 0.830690377 |
| lysopcac161.pcaec402           | -0.007648396 | 0.035713234 | 0.830739613 |
| pcaac342.pcaec386              | 0.002793468  | 0.013047403 | 0.830786289 |
| pcaac424.leucine               | 0.00459044   | 0.021445483 | 0.830825077 |
| alanine.smc241                 | -0.00386826  | 0.018079445 | 0.830897131 |
| pcaec301.pcaac424              | -0.00172981  | 0.008085479 | 0.83091168  |
| acetylmithoine.pcaec420        | 0.006971649  | 0.032623981 | 0.831101003 |
| c101.c5                        | 0.004989145  | 0.02335446  | 0.831155462 |
| pcaac321.pcaac402              | -0.003709037 | 0.017373141 | 0.831260157 |
| pcaec340.smc260                | 0.00667641   | 0.031276213 | 0.831280795 |
| lysopcac170.c18                | 0.014363541  | 0.067334906 | 0.831398437 |
| smc202.smohc222                | -0.001953016 | 0.00916046  | 0.831487414 |
| pcaac321.pcaec384              | 0.013560564  | 0.063610278 | 0.831501944 |
| pcaac385.pcaac424              | -0.002315824 | 0.010872291 | 0.831641745 |

|                              |              |             |             |
|------------------------------|--------------|-------------|-------------|
| arginine.c14                 | -0.006442143 | 0.030257263 | 0.83171186  |
| pcaac403.arginine            | -0.016269593 | 0.076432266 | 0.831750322 |
| serotonin.lysine             | 0.014244542  | 0.066921201 | 0.831756112 |
| c162.pcaec446                | -0.007483554 | 0.035164758 | 0.83178835  |
| alphaaminoadipicacid.smc161  | 0.011448916  | 0.053802871 | 0.831804122 |
| c8.pcaec425                  | 0.013969605  | 0.065668017 | 0.83185321  |
| c5.smc160                    | -0.032270492 | 0.15172761  | 0.831887235 |
| pcaac403.c51dc               | 0.031417643  | 0.147737743 | 0.831909665 |
| pcaec362.spermidine          | -0.015350061 | 0.072193093 | 0.831935463 |
| citruline.pcaec402           | 0.009091256  | 0.042773525 | 0.831998582 |
| leucine.threonine            | -0.006685372 | 0.031458078 | 0.83201971  |
| c2.c5                        | -0.001368766 | 0.006440808 | 0.832021387 |
| methioninesulfoxide.pcaec360 | -0.001056276 | 0.004971083 | 0.832045162 |
| pcaec361.c2                  | 0.017876851  | 0.084136619 | 0.832053003 |
| pcaac381.smc261              | 0.009178361  | 0.043207479 | 0.832091006 |
| pcaac406.pcaac426            | 0.013408141  | 0.063119599 | 0.83209171  |
| c5.pcaac300                  | -0.021046565 | 0.099082838 | 0.832099918 |
| c5.pcaac381                  | 0.008003009  | 0.037704257 | 0.832221671 |
| pcaac386.valine              | 0.013182814  | 0.062137111 | 0.83229998  |
| putrescine.pcaac383          | -0.000752081 | 0.003545531 | 0.832327917 |
| pcaac365.pcaec322            | 0.020834854  | 0.098229961 | 0.832342038 |
| lysopcac180.pcaac383         | -0.001037382 | 0.004892369 | 0.83239039  |
| c142.c4                      | -0.004419715 | 0.020844443 | 0.832396221 |
| pcaec361.pcaec420            | -0.005386189 | 0.025407652 | 0.832429261 |
| lysine.smc241                | -0.001856108 | 0.008755744 | 0.83243191  |
| pcaec423.pcaac281            | -0.000815437 | 0.003847684 | 0.832477179 |
| c3.pcaec380                  | 0.009116145  | 0.04302019  | 0.832496949 |
| pcaec322.methionine          | -0.005053697 | 0.02385357  | 0.832528503 |
| ornithine.pcaac322           | -0.010658958 | 0.050311214 | 0.832530745 |
| pcaec380.lysopcac280         | -0.003714861 | 0.01753639  | 0.8325488   |
| arginine.smc241              | -0.00171338  | 0.008094926 | 0.832686065 |
| pcaec382.h1                  | 0.000845397  | 0.003996025 | 0.832765164 |
| pcaac386.smohc161            | -0.00355873  | 0.016822196 | 0.83277278  |
| pcaec443.histidine           | 0.018456417  | 0.087245553 | 0.832775892 |
| smc202.pcaec322              | 0.028764504  | 0.136048015 | 0.832866675 |
| pcaac361.pcaac365            | -0.007980366 | 0.037746396 | 0.832873257 |
| serine.pcaec384              | -0.005007272 | 0.023685842 | 0.832886516 |
| smohc141.c181                | -0.004392312 | 0.020782841 | 0.832933548 |
| pcaec321.methioninesulfoxide | 0.003884363  | 0.018387667 | 0.833007475 |
| arginine.taurine             | -0.006408196 | 0.030346884 | 0.833072404 |
| c8.pcaec422                  | 0.008398025  | 0.039800993 | 0.833200494 |
| lysopcac170.pcaec384         | -0.006827039 | 0.032366554 | 0.833256236 |
| pcaac425.pcaec420            | 0.01217908   | 0.057740589 | 0.833257233 |

|                                |              |             |             |
|--------------------------------|--------------|-------------|-------------|
| pcaec380.c18                   | 0.01197151   | 0.056795297 | 0.83336943  |
| prolinr.pcaac424               | 0.003015669  | 0.014314851 | 0.833460013 |
| pcaec405.c2                    | -0.018587277 | 0.088265162 | 0.833524374 |
| pcaec364.pcaac426              | 0.006501225  | 0.030879684 | 0.833563698 |
| alphaaminoadipicacid.smc202    | -0.008677922 | 0.041229164 | 0.833605634 |
| pcaac341.valine                | -0.011045693 | 0.052517635 | 0.833727679 |
| c18.asymmetricdimethylarginine | 0.00578813   | 0.027559673 | 0.833962747 |
| methionine.pcaec385            | 0.00997075   | 0.047480961 | 0.833983781 |
| pcaac405.glutamicacid          | -0.010445843 | 0.049771071 | 0.834074845 |
| pcaac342.lysopcac180           | -0.011032322 | 0.052609166 | 0.834210682 |
| pcaec301.c141oh                | -0.0192021   | 0.091588174 | 0.834246857 |
| lysopcac182.pcaac421           | -0.002288926 | 0.010918275 | 0.834258756 |
| glutamine.pcaec382             | 0.005582242  | 0.026629635 | 0.834271633 |
| c14.smc181                     | 0.007455187  | 0.035571983 | 0.834306594 |
| pcaec446.pcaac420              | -0.0057927   | 0.02764643  | 0.834347356 |
| c8.taurine                     | -0.010459141 | 0.049926182 | 0.834375296 |
| pcaac365.pcaac363              | 0.003083209  | 0.014723393 | 0.834440128 |
| pcaac421.methionine            | -0.008572224 | 0.040950531 | 0.834500652 |
| c51.pcaac300                   | -0.013596276 | 0.064968637 | 0.834544858 |
| phenylalanine.pcaac363         | -0.004206852 | 0.020106818 | 0.834583268 |
| pcaac240.methioninesulfoxide   | 0.0041673    | 0.019925564 | 0.834646957 |
| smohc221.pcaec420              | -0.003338393 | 0.015964118 | 0.834666332 |
| pcaec341.smc261                | 0.010055336  | 0.048094678 | 0.834701204 |
| pcaac381.pcaac444              | -0.029534852 | 0.141276576 | 0.834714294 |
| smc261.arginine                | -0.007349553 | 0.035178315 | 0.834818806 |
| c5.taurine                     | 0.009759895  | 0.046716908 | 0.834824359 |
| phenylalanine.smc241           | -0.002660364 | 0.012746308 | 0.834979573 |
| pcaec341.pcaac403              | 0.013192268  | 0.063213864 | 0.834998148 |
| pcaac364.smohc161              | -0.011431394 | 0.054777236 | 0.835001162 |
| lysopcac161.pcaec384           | 0.010481362  | 0.050228818 | 0.835014013 |
| pcaec321.ornithine             | -0.007781076 | 0.037291948 | 0.835029056 |
| lysopcac280.pcaac320           | 0.023035485  | 0.110477011 | 0.835141    |
| smc241.phenylalanine           | -0.007835509 | 0.037580177 | 0.835147366 |
| acetylmithoine.pcaac424        | -0.002676245 | 0.012845465 | 0.83527166  |
| c141oh.pcaac363                | 0.002608843  | 0.012528481 | 0.835356292 |
| methioninesulfoxide.pcaac421   | 0.008167777  | 0.039249481 | 0.83546073  |
| pcaac365.lysopcac203           | -0.005711354 | 0.027462129 | 0.835559694 |
| pcaac404.smohc221              | 0.01345616   | 0.064747096 | 0.835673099 |
| pcaec406.threonine             | -0.008450021 | 0.040669813 | 0.835716065 |
| pcaec384.smohc241              | -0.016198676 | 0.077990874 | 0.835771937 |
| pcaec401.c3                    | 0.00740069   | 0.035632918 | 0.835777495 |
| c142.c162                      | 0.027280343  | 0.131364381 | 0.835795607 |
| glycine.pcaac401               | 0.001044157  | 0.005028599 | 0.835815499 |

|                               |              |             |             |
|-------------------------------|--------------|-------------|-------------|
| pcaec406.methionine           | -0.00609168  | 0.029338111 | 0.835820661 |
| alphaaminoadipicacid.arginine | 0.011764582  | 0.056696985 | 0.835928102 |
| smohc141.lysopcac140          | 0.000175984  | 0.00084817  | 0.835937608 |
| pcaec403.pcaac424             | 0.005550124  | 0.026753477 | 0.83596312  |
| lysine.c162                   | 0.020073506  | 0.096816336 | 0.836055379 |
| lysopcac161.pcaac300          | 0.009908963  | 0.047793452 | 0.836060873 |
| c51.pcaac323                  | -0.012927253 | 0.062351868 | 0.836062002 |
| lysopcac181.pcaec421          | -0.000622299 | 0.003001621 | 0.836066945 |
| pcaac364.pcaec405             | -0.014978987 | 0.072256247 | 0.836080503 |
| pcaac366.pcaac380             | 0.011333588  | 0.054674702 | 0.836090197 |
| pcaac386.smohc222             | 0.001647223  | 0.00794873  | 0.836137154 |
| smc181.smc241                 | 0.007153776  | 0.034522214 | 0.836143873 |
| c5.smc202                     | -0.021688796 | 0.104704254 | 0.836205432 |
| c51dc.pcaec343                | 0.012702145  | 0.061322143 | 0.836209661 |
| pcaec445.smc202               | -0.013244894 | 0.06394852  | 0.836225186 |
| lysopcac182.smc180            | 0.008473694  | 0.040915612 | 0.836237911 |
| pcaac424.methionine           | -0.006762372 | 0.032657969 | 0.836265353 |
| ornithine.c10                 | 0.002501782  | 0.012082685 | 0.836274207 |
| lysine.pcaec321               | -0.004361558 | 0.021067579 | 0.836296138 |
| c182.smc241                   | 0.001218874  | 0.005890921 | 0.836389502 |
| pcaec362.lysine               | 0.011286582  | 0.054557617 | 0.836415002 |
| acetylmethionine.smc241       | 0.005196392  | 0.025134183 | 0.836515188 |
| lysopcac140.pcaec444          | 0.019914853  | 0.096485347 | 0.836782657 |
| leucine.smc260                | -0.003584423 | 0.017368394 | 0.836803476 |
| pcaec362.pcaec384             | 0.016371267  | 0.079335515 | 0.836820105 |
| c5.smc240                     | 0.025634755  | 0.124320493 | 0.836941622 |
| prolinr.pcaac426              | 0.017347027  | 0.084136813 | 0.83695919  |
| lysopcac281.lysopcac160       | 0.0094446    | 0.045808428 | 0.836959496 |
| alphaaminoadipicacid.c51      | 0.014261204  | 0.069219309 | 0.8370739   |
| pcaac320.tyrosine             | 0.012809114  | 0.062177423 | 0.837089636 |
| pcaec300.pcaac404             | -0.000965811 | 0.004688231 | 0.837090772 |
| c101.pcaac344                 | -0.012931794 | 0.062777291 | 0.83710079  |
| pcaec385.valine               | 0.017224027  | 0.083631479 | 0.837134545 |
| pcaac281.pcaac404             | -0.001021019 | 0.004958677 | 0.837170403 |
| c14.c141                      | -0.010544754 | 0.051230235 | 0.837228717 |
| kynurenine.c4                 | -0.004096652 | 0.019909827 | 0.83728359  |
| pcaec365.pcaec322             | -0.022150336 | 0.107657301 | 0.837292736 |
| smc261.lysopcac140            | 0.000318703  | 0.001549164 | 0.83731034  |
| pcaac385.creatinine           | 0.003073567  | 0.014945014 | 0.837363056 |
| pcaec360.pcaac341             | 0.003770986  | 0.018338401 | 0.837382582 |
| glycine.pcaec343              | 0.017222275  | 0.083762871 | 0.837402713 |
| pcaac320.pcaec301             | -0.014283111 | 0.069476944 | 0.837423698 |
| citruline.pcaec340            | -0.008188565 | 0.039833228 | 0.837431017 |

|                                |              |             |             |
|--------------------------------|--------------|-------------|-------------|
| pcaec384.smc181                | -0.003508854 | 0.017070815 | 0.837449934 |
| lysopcac182.spermidine         | -0.015654128 | 0.076191216 | 0.837518943 |
| pcaec385.pcaac323              | 0.020370247  | 0.09918609  | 0.83758475  |
| lysopcac140.pcaec401           | 0.016472135  | 0.080208618 | 0.837590897 |
| pcaec423.kynurenine            | 0.001651305  | 0.008041801 | 0.837611143 |
| pcaec340.threonine             | -0.005950317 | 0.028984307 | 0.837646816 |
| c14.pcaec404                   | 0.00918815   | 0.044758358 | 0.83765537  |
| pcaec420.pcaec402              | -0.011477997 | 0.055931655 | 0.837708997 |
| pcaac422.arginine              | -0.0039014   | 0.019013275 | 0.837725538 |
| c2.pcaac406                    | 0.011718262  | 0.05714272  | 0.837821754 |
| lysopcac140.pcaac240           | -0.004661489 | 0.022735654 | 0.837853072 |
| c14.c162                       | -0.021067148 | 0.102777807 | 0.837893858 |
| pcaac300.valine                | -0.010900022 | 0.053191433 | 0.837938278 |
| leucine.methioninesulfoxide    | 0.003869444  | 0.018887008 | 0.837975153 |
| asparticacid.acetylorlitho     | -0.013017913 | 0.063547015 | 0.837989587 |
| glycine.pcaac380               | -0.012035401 | 0.058764971 | 0.838027894 |
| pcaac281.isoleucine            | 0.006045211  | 0.029518779 | 0.838038556 |
| pcaec403.glycine               | 0.003968442  | 0.019380811 | 0.83806246  |
| serine.c4                      | 0.005383181  | 0.026292946 | 0.838080224 |
| c101.smohc161                  | 0.0015883    | 0.00775808  | 0.838088131 |
| lysine.c18                     | -0.012490022 | 0.061034035 | 0.838156894 |
| methioninesulfoxide.isoleucine | 0.006880497  | 0.033623955 | 0.838164274 |
| pcaec422.smohc161              | 0.00342676   | 0.016748438 | 0.838186935 |
| pcaec406.pcaec322              | 0.027320297  | 0.133581921 | 0.838249974 |
| c10.pcaac401                   | -0.000690693 | 0.003378484 | 0.838314079 |
| pcaec386.pcaac363              | -0.002080652 | 0.010181899 | 0.838384704 |
| histidine.c141oh               | 0.023963044  | 0.117341415 | 0.838487434 |
| c141oh.pcaac320                | 0.017932414  | 0.087825536 | 0.838514102 |
| lysine.pcaac404                | -0.00107103  | 0.005247844 | 0.838586347 |
| pcaac362.c3                    | 0.017678479  | 0.086622376 | 0.838588566 |
| c142.pcaac364                  | 0.009082757  | 0.044520746 | 0.838647024 |
| pcaac323.lysopcac160           | 0.003085936  | 0.015128372 | 0.838669186 |
| pcaec422.pcaac323              | -0.020714809 | 0.101552531 | 0.838670869 |
| pcaac362.lysopcac161           | -0.013617397 | 0.066819344 | 0.838816703 |
| lysopcac170.spermidine         | 0.014817155  | 0.072730127 | 0.838868456 |
| alphaaminoadipicacid.pcaac425  | -0.013773863 | 0.067610004 | 0.838870533 |
| c4.arginine                    | 0.01458296   | 0.071603329 | 0.83891894  |
| lysopcac280.smc261             | 0.013305106  | 0.065357164 | 0.838987454 |
| lysine.pcaac322                | 0.01061282   | 0.05214872  | 0.839037896 |
| asparagine.pcaac360            | -0.006689593 | 0.032872061 | 0.83904316  |
| pcaac402.pcaac426              | 0.024769115  | 0.12178036  | 0.839130674 |
| smc261.lysopcac182             | 0.008761812  | 0.043089801 | 0.839172225 |
| c14.pcaac402                   | -0.004103686 | 0.020184633 | 0.839196403 |

|                                |              |             |             |
|--------------------------------|--------------|-------------|-------------|
| c16.arginine                   | -0.009502985 | 0.046742258 | 0.839197463 |
| smc160.methionine              | 0.006070788  | 0.029889469 | 0.839352045 |
| spermidine.lysopcac161         | -0.040226581 | 0.19808378  | 0.839374887 |
| glutamicacid.pcaec420          | -0.01042865  | 0.051365738 | 0.839414878 |
| pcaec301.pcaac240              | 0.003771019  | 0.018575786 | 0.83943056  |
| pcaac402.pcaac404              | -0.004213612 | 0.020757955 | 0.839445722 |
| pcaac380.pcaac381              | -0.007317843 | 0.036061576 | 0.839493688 |
| pcaac321.histidine             | 0.012508745  | 0.061651922 | 0.839519668 |
| pcaac322.lysopcac161           | -0.015619815 | 0.077033771 | 0.839618904 |
| lysopcac204.pcaac404           | -0.001622321 | 0.008001948 | 0.839638452 |
| pcaac363.valine                | -0.013090837 | 0.064628266 | 0.839782663 |
| pcaac402.glycine               | 0.00375646   | 0.018546197 | 0.839790318 |
| lysopcac181.smohc161           | 0.004060568  | 0.020063886 | 0.839918365 |
| pcaac365.lysopcac160           | 0.008605626  | 0.04252958  | 0.839947606 |
| pcaac360.lysopcac180           | 0.017759334  | 0.087769713 | 0.839951011 |
| pcaac360.spermidine            | -0.014057771 | 0.069482376 | 0.839965623 |
| smc261.pcaac420                | -0.017317313 | 0.085673681 | 0.840114104 |
| c0.pcaec342                    | -0.010110805 | 0.050041694 | 0.840179214 |
| smc180.pcaec404                | 0.005132544  | 0.025403748 | 0.840186071 |
| c51.pcaec365                   | -0.00577494  | 0.028585377 | 0.840197422 |
| serine.glutamicacid            | 0.008031971  | 0.03975854  | 0.840201736 |
| pcaac421.smohc222              | 0.000989418  | 0.00490067  | 0.840298794 |
| smc180.pcaec420                | -0.003536881 | 0.017520009 | 0.840312583 |
| lysopcac180.transhydroxyprolin | -0.010710438 | 0.053055994 | 0.840317439 |
| pcaac323.c162                  | -0.019017055 | 0.094228282 | 0.840357616 |
| c102.pcaec384                  | 0.007624624  | 0.037799542 | 0.84044102  |
| smc260.c5                      | 0.002315307  | 0.011485436 | 0.840539131 |
| pcaac320.smc260                | 0.005717131  | 0.028390645 | 0.840705006 |
| pcaec384.pcaac421              | 0.006146032  | 0.030535944 | 0.840784373 |
| smohc221.c0                    | 0.00016615   | 0.000825664 | 0.840815299 |
| c142.smc261                    | -0.005904053 | 0.029360483 | 0.840927681 |
| pcaac421.pcaac323              | 0.024823903  | 0.123462495 | 0.840946487 |
| acetylornithoine.pcaec401      | -0.004771193 | 0.0237321   | 0.840962439 |
| lysine.pcaac320                | 0.02610635   | 0.129940714 | 0.841067151 |
| pcaec361.spermidine            | 0.013908398  | 0.069229144 | 0.841071758 |
| pcaac363.smc260                | 0.006306033  | 0.031399357 | 0.841126854 |
| c2.glycine                     | 0.005208486  | 0.025942374 | 0.841175101 |
| pcaac322.smohc161              | -0.002832616 | 0.014111794 | 0.841209857 |
| c4.lysopcac182                 | 0.012787361  | 0.063709549 | 0.841220331 |
| pcaac421.c101                  | 0.003171476  | 0.015802423 | 0.841234302 |
| lysopcac180.tyrosine           | -0.010887377 | 0.054290023 | 0.841354882 |
| serine.pcaec380                | -0.010634597 | 0.053031046 | 0.841359342 |
| pcaec363.pcaac321              | -0.007026224 | 0.035057846 | 0.84145088  |

|                               |              |             |             |
|-------------------------------|--------------|-------------|-------------|
| lysopcac203.pcaac421          | -0.00390232  | 0.019474094 | 0.841476514 |
| asparagine.pcaac321           | -0.004964087 | 0.024779322 | 0.841518151 |
| c4.pcaac404                   | -0.001732581 | 0.008650954 | 0.841561496 |
| kynurenine.pcaec362           | -0.002629457 | 0.013136421 | 0.841648035 |
| pcaac425.pcaac364             | -0.014199203 | 0.070979667 | 0.841741189 |
| lysopcac182.c10               | -0.00567554  | 0.028376123 | 0.841768472 |
| c51.c141oh                    | 0.020697067  | 0.103489862 | 0.841783976 |
| pcaac360.pcaac344             | -0.017294637 | 0.086485287 | 0.841798997 |
| ornithine.transhydroxyproline | -0.007524412 | 0.037632797 | 0.841821685 |
| pcaac384.pcaac404             | 0.003154703  | 0.015779039 | 0.84183181  |
| pcaec386.pcaac426             | 0.010587418  | 0.05295652  | 0.841834427 |
| glutamicacid.glycine          | -0.006282103 | 0.031424536 | 0.841846807 |
| pcaec383.prolinr              | -0.004884863 | 0.024440417 | 0.841880014 |
| pcaec403.pcaac364             | -0.009347367 | 0.04678919  | 0.841951832 |
| pcaac320.ornithine            | 0.005738553  | 0.028728092 | 0.841969115 |
| methioninesulfoxide.pcaac323  | -0.030639057 | 0.153383972 | 0.841969195 |
| pcaac365.tryptophan           | 0.000919523  | 0.004603276 | 0.841969228 |
| pcaec422.lysopcac140          | -0.000320043 | 0.001602409 | 0.84199078  |
| pcaac386.c4                   | -0.004040627 | 0.020244809 | 0.842098537 |
| pcaec362.pcaac281             | -0.00043061  | 0.002157894 | 0.842127548 |
| glutamicacid.putrescine       | 0.017719101  | 0.088840879 | 0.842208338 |
| prolinr.pcaac323              | -0.018668822 | 0.093621649 | 0.842239958 |
| pcaac401.prolinr              | -0.006291382 | 0.031574062 | 0.842356429 |
| lysine.pcaac426               | -0.009889453 | 0.049650264 | 0.842415475 |
| c0.smc241                     | 0.004928437  | 0.02475964  | 0.842517761 |
| pcaec342.pcaec446             | -0.008192007 | 0.041169415 | 0.842571176 |
| lysopcac140.lysopcac281       | -0.003057724 | 0.015383591 | 0.842740994 |
| pcaac383.pcaec383             | 0.015591022  | 0.078454945 | 0.842771854 |
| alanine.pcaec343              | -0.015388744 | 0.07745095  | 0.842799649 |
| pcaec342.smc261               | 0.013521891  | 0.06813682  | 0.842985598 |
| pcaec364.c142                 | 0.008726668  | 0.043998718 | 0.843073754 |
| smc241.pcaec403               | 0.005121067  | 0.025821395 | 0.843083601 |
| lysopcac170.pcaac360          | 0.007083411  | 0.035722127 | 0.84311057  |
| pcaec406.c2                   | -0.012778791 | 0.064454302 | 0.84313456  |
| pcaec301.pcaec364             | -0.003627169 | 0.018295806 | 0.843142254 |
| pcaac385.c101                 | -0.001249257 | 0.006303745 | 0.843200333 |
| leucine.smc241                | -0.004451629 | 0.022480092 | 0.843318732 |
| smc202.pcaec363               | 0.004250526  | 0.021468273 | 0.843345543 |
| lysopcac180.pcaec301          | 0.008994903  | 0.045459826 | 0.843444064 |
| pcaec361.pcaac360             | 0.017508518  | 0.088500675 | 0.843467521 |
| c12.lysopcac140               | 0.000765456  | 0.003870334 | 0.843514174 |
| pcaec446.pcaec384             | 0.005979707  | 0.030236599 | 0.843522953 |
| c3.pcaac422                   | -0.013537231 | 0.068467556 | 0.843559191 |

|                                |              |             |             |
|--------------------------------|--------------|-------------|-------------|
| pcaec402.pcaec301              | -0.015232192 | 0.07704042  | 0.843559638 |
| pcaac342.c162                  | -0.016012783 | 0.08099483  | 0.843571812 |
| serine.methionine              | -0.005838626 | 0.029541078 | 0.843616323 |
| pcaec422.pcaec403              | -0.008869338 | 0.04487916  | 0.84362975  |
| lysopcac181.phenylalanine      | 0.016087997  | 0.08142395  | 0.843664105 |
| glycine.pcaac383               | -0.000906018 | 0.004586977 | 0.843713743 |
| pcaec382.tyrosine              | 0.01324943   | 0.067112658 | 0.843790917 |
| pcaec403.pcaec422              | -0.014094655 | 0.071498878 | 0.844017083 |
| asparticacid.lysopcac140       | -0.000257989 | 0.001308826 | 0.844029608 |
| lysopcac161.pcaac425           | 0.016754414  | 0.085004673 | 0.844041457 |
| pcaac404.asymmetricdimethylar  | -0.005258996 | 0.026682494 | 0.844045011 |
| pcaac404.pcaec422              | -0.002444765 | 0.012408009 | 0.844095116 |
| ornithine.glutamine            | 0.005685872  | 0.028861427 | 0.844114886 |
| pcaac401.pcaac320              | -0.015769431 | 0.080069834 | 0.844161694 |
| pcaac403.c51                   | -0.027431576 | 0.139367968 | 0.844253509 |
| pcaec402.smc240                | -0.00786396  | 0.039956512 | 0.844265567 |
| c181.spermidine                | 0.015324488  | 0.077863559 | 0.844266275 |
| asparagine.pcaec340            | 0.013437396  | 0.068281424 | 0.844280142 |
| pcaac321.pcaac361              | 0.018500023  | 0.094024943 | 0.844309641 |
| pcaac281.pcaec422              | -0.00612423  | 0.031128663 | 0.844323157 |
| smohc141.pcaec401              | 0.01062893   | 0.054029111 | 0.84433351  |
| pcaac424.c5                    | -0.003790869 | 0.019270234 | 0.844337008 |
| alphaaminoadipicacid.histidine | -0.01306052  | 0.066393461 | 0.844342909 |
| pcaec443.arginine              | -0.018503643 | 0.094086314 | 0.844379837 |
| c14.pcaac420                   | -0.014865362 | 0.075599308 | 0.84440569  |
| pcaac380.pcaec321              | -0.010959846 | 0.055741398 | 0.844416677 |
| smohc141.glutamine             | 0.004030178  | 0.020503122 | 0.844459942 |
| pcaac364.pcaac300              | 0.016539584  | 0.084144956 | 0.844462686 |
| smc202.smc260                  | 0.00732484   | 0.037279108 | 0.844520597 |
| lysopcac280.pcaec384           | 0.013565382  | 0.069047474 | 0.844537697 |
| pcaec445.arginine              | -0.007334063 | 0.037335521 | 0.844559537 |
| lysopcac280.pcaac421           | -0.003553877 | 0.018093375 | 0.844573554 |
| smohc241.pcaac425              | 0.01648571   | 0.084107397 | 0.844894457 |
| pcaac401.pcaec363              | 0.008627103  | 0.044019    | 0.844911613 |
| c5.threonine                   | -0.007736456 | 0.039499862 | 0.845009696 |
| pcaac320.smohc161              | 0.007827369  | 0.039971461 | 0.845038133 |
| pcaac420.pcaec384              | -0.004358439 | 0.022261436 | 0.845069128 |
| pcaac425.c141oh                | -0.019024378 | 0.097205514 | 0.845124834 |
| c14.pcaec364                   | -0.002722435 | 0.01391519  | 0.845178043 |
| pcaec321.pcaac384              | 0.014241483  | 0.072802545 | 0.845199062 |
| pcaac360.pcaec384              | 0.023447951  | 0.119902207 | 0.845245133 |
| pcaec382.pcaec385              | 0.018805091  | 0.09618234  | 0.845279467 |
| prolinr.pcaac365               | 0.00968205   | 0.049538429 | 0.845333982 |



|                                |              |             |             |
|--------------------------------|--------------|-------------|-------------|
| pcaac403.glycine               | 0.004159023  | 0.021281614 | 0.845347464 |
| pcaac281.serotonin             | 0.023130388  | 0.118390064 | 0.845389317 |
| pcaec423.taurine               | -0.009732288 | 0.049825068 | 0.845424671 |
| pcaec406.pcaac365              | 0.011570222  | 0.059260635 | 0.845492009 |
| lysine.lysopcac140             | -0.000299808 | 0.00153584  | 0.845519457 |
| c5.pcaec422                    | 0.007768078  | 0.039798833 | 0.845538423 |
| pcaec360.pcaac421              | -0.003912794 | 0.02004983  | 0.84556194  |
| pcaec340.lysopcac281           | -0.003515054 | 0.01801322  | 0.845574426 |
| pcaac342.smc260                | 0.005987031  | 0.030694828 | 0.845642658 |
| pcaec405.putrescine            | -0.01617534  | 0.082967485 | 0.845713104 |
| lysopcac281.pcaec420           | 0.00557608   | 0.028607898 | 0.845749034 |
| methionine.pcaec444            | -0.024776675 | 0.127196887 | 0.845845962 |
| leucine.glutamine              | -0.004787103 | 0.024585521 | 0.845906633 |
| pcaec402.lysopcac140           | 0.000216947  | 0.001114277 | 0.845918426 |
| pcaac383.smohc221              | 0.010719999  | 0.055076709 | 0.845964986 |
| pcaac385.pcaac300              | 0.024645485  | 0.126636232 | 0.845981579 |
| pcaec362.c4                    | -0.002937024 | 0.015105061 | 0.846119631 |
| asparticacid.glycine           | -0.003603473 | 0.018538993 | 0.84617203  |
| lysopcac182.histidine          | 0.008982602  | 0.046219953 | 0.846193884 |
| lysopcac160.smc161             | -0.018719633 | 0.096325626 | 0.846199892 |
| prolinr.c8                     | 0.006669359  | 0.034336746 | 0.846280488 |
| pcaec384.pcaac420              | 0.013521626  | 0.069617246 | 0.846284985 |
| pcaac343.methioninesulfoxide   | 0.004674081  | 0.024067525 | 0.846301513 |
| c162.tyrosine                  | 0.009657213  | 0.049729411 | 0.846310695 |
| c8.pcaec301                    | 0.0130862    | 0.067397358 | 0.846334389 |
| pcaec384.pcaac321              | 0.005355593  | 0.027585117 | 0.846347642 |
| smc240.pcaec301                | 0.010699386  | 0.055110514 | 0.846350564 |
| c2.serine                      | 0.011367535  | 0.058562262 | 0.846377092 |
| pcaec301.serotonin             | -0.012140949 | 0.062557339 | 0.846402967 |
| pcaec381.pcaec363              | 0.009906785  | 0.05105498  | 0.846430801 |
| asparagine.smohc222            | 0.001371761  | 0.007079144 | 0.846639088 |
| pcaac281.pcaac381              | 0.008549356  | 0.044138033 | 0.846700898 |
| pcaac320.pcaec341              | 0.01621117   | 0.083696726 | 0.846705959 |
| pcaec446.smc161                | 0.016905397  | 0.087289014 | 0.846719935 |
| smohc221.pcaac321              | 0.005095917  | 0.026313413 | 0.846727139 |
| lysopcac160.transhydroxyprolin | 0.016125314  | 0.08326573  | 0.846728273 |
| c142.pcaec445                  | 0.011088644  | 0.057309357 | 0.846863777 |
| c16.smc241                     | 0.003437094  | 0.017771594 | 0.846929191 |
| pcaac426.pcaec444              | 0.031968198  | 0.165386481 | 0.847015081 |
| kynurenine.c3                  | 0.008229165  | 0.042574436 | 0.847019006 |
| pcaec406.arginine              | 0.006312917  | 0.032671385 | 0.847069212 |
| pcaec321.pcaec402              | -0.012317045 | 0.063781157 | 0.847155558 |
| c162.smc180                    | 0.002196771  | 0.011383573 | 0.847262544 |

|                                 |              |             |             |
|---------------------------------|--------------|-------------|-------------|
| lysopcac160.c8                  | -0.012821922 | 0.066458991 | 0.847299634 |
| pcaac403.pcaec341               | -0.008359003 | 0.043326824 | 0.847300259 |
| pcaec381.pcaec403               | 0.038229818  | 0.198176674 | 0.847316894 |
| h1.serotonin                    | -0.016075818 | 0.083363328 | 0.84736954  |
| pcaec363.pcaac365               | -0.009032482 | 0.046860194 | 0.847437207 |
| smc241.smohc161                 | -0.003952939 | 0.020509369 | 0.847449436 |
| pcaac422.smc260                 | 0.012774093  | 0.066293074 | 0.847486154 |
| pcaec301.smc180                 | -0.00602097  | 0.031276484 | 0.847629465 |
| smc161.pcaec321                 | -0.005118455 | 0.026596191 | 0.847674193 |
| c8.pcaac344                     | -0.011810681 | 0.061439867 | 0.847845486 |
| citruline.smohc161              | 0.001897361  | 0.009874935 | 0.847917806 |
| pcaec362.c182                   | 0.006944517  | 0.036146933 | 0.847933374 |
| smc181.pcaac343                 | 0.004231721  | 0.022028021 | 0.847943429 |
| c141.pcaec343                   | -0.018464026 | 0.096122591 | 0.84795746  |
| pcaac405.methioninesulfoxide    | 0.00761843   | 0.03966183  | 0.847960303 |
| lysopcac280.asymmetricdimethy   | 0.004705385  | 0.024498278 | 0.847971752 |
| putrescine.pcaec445             | 0.016937669  | 0.088274744 | 0.848124642 |
| arginine.pcaec343               | 0.015558085  | 0.081126406 | 0.848201742 |
| putrescine.pcaec380             | 0.011245772  | 0.058656624 | 0.848243745 |
| alanine.c3                      | -0.009863985 | 0.051470799 | 0.848306103 |
| smc161.lysopcac170              | 0.001833454  | 0.009569236 | 0.8483402   |
| smc181.pcaac404                 | -0.00184726  | 0.009643951 | 0.848381491 |
| lysopcac182.pcaec322            | 0.015149853  | 0.079147228 | 0.848484986 |
| c12.pcaec361                    | -0.002240672 | 0.011708722 | 0.848520791 |
| smc241.spermidine               | 0.013032947  | 0.06811953  | 0.848554487 |
| smohc222.pcaec361               | -0.002793082 | 0.014621652 | 0.848789847 |
| h1.pcaac364                     | 0.004069324  | 0.02130456  | 0.848802732 |
| pcaec402.pcaec382               | 0.010935238  | 0.057254488 | 0.848813401 |
| lysopcac160.c3                  | -0.007068703 | 0.03701442  | 0.848830566 |
| lysopcac180.c101                | -0.001824947 | 0.009560134 | 0.848893313 |
| pcaac402.pcaec341               | -0.007546586 | 0.039543153 | 0.84893009  |
| smohc241.lysopcac140            | 0.000179955  | 0.000942985 | 0.848937386 |
| smohc221.pcaac420               | 0.009262639  | 0.04853983  | 0.848944773 |
| pcaac422.pcaac420               | 0.035153778  | 0.18424142  | 0.848962561 |
| pcaec343.pcaec385               | -0.012322158 | 0.064599712 | 0.849006719 |
| pcaac363.pcaec362               | -0.003829899 | 0.020080561 | 0.84902207  |
| serotonin.c181                  | -0.003544623 | 0.018585212 | 0.849025125 |
| pcaac320.pcaac424               | -0.002127007 | 0.011158955 | 0.849113415 |
| asymmetricdimethylarginine.pca  | 0.001901924  | 0.009978981 | 0.849126623 |
| asymmetricdimethylarginine.tryf | -0.002306837 | 0.012104365 | 0.849137597 |
| spermidine.c5                   | -0.009577947 | 0.050277586 | 0.849198299 |
| kynurenine.phenylalanine        | 0.01411003   | 0.074071922 | 0.849206425 |
| prolinr.pcaec445                | -0.007185037 | 0.037726342 | 0.849237291 |

|                                 |              |             |             |
|---------------------------------|--------------|-------------|-------------|
| pcaec385.pcaac424               | 0.002901561  | 0.015242256 | 0.8493065   |
| pcaec386.lysopcac204            | 0.006884872  | 0.036189549 | 0.849398952 |
| pcaac362.lysopcac204            | -0.004342207 | 0.022827444 | 0.849419298 |
| methioninesulfoxide.lysopcac171 | 0.002964079  | 0.015595506 | 0.849543594 |
| pcaac425.pcaec321               | -0.003635597 | 0.019131627 | 0.849566347 |
| pcaac402.prolinr                | -0.004921715 | 0.025908425 | 0.84961709  |
| pcaac405.histidine              | 0.010684805  | 0.056257361 | 0.849647276 |
| c0.c4                           | 0.003741961  | 0.019711239 | 0.849716306 |
| pcaac385.pcaec401               | 0.006994554  | 0.036861619 | 0.849784575 |
| lysopcac160.pcaec322            | -0.011326245 | 0.059708733 | 0.849831566 |
| pcaac383.pcaac404               | -0.00079662  | 0.004201126 | 0.849887025 |
| pcaec360.lysopcac140            | -0.000323183 | 0.001704374 | 0.849887772 |
| pcaec362.pcaac344               | 0.019218954  | 0.101449105 | 0.850024993 |
| pcaec300.pcaec385               | -0.011410646 | 0.060243523 | 0.85005285  |
| pcaec402.spermidine             | 0.012785913  | 0.06755852  | 0.850171607 |
| serotonin.smc261                | 0.007176349  | 0.037930568 | 0.850218441 |
| smohc141.pcaec364               | 0.008041681  | 0.042521731 | 0.850279181 |
| pcaec405.lysopcac160            | -0.020956176 | 0.110842929 | 0.850324093 |
| pcaec385.lysopcac161            | 0.018461155  | 0.097651226 | 0.850331879 |
| acetylmithoine.pcaac320         | 0.01607443   | 0.08505657  | 0.850384124 |
| pcaec384.c101                   | 0.002634813  | 0.013942537 | 0.850390842 |
| c162.pcaac421                   | 0.009748691  | 0.051587415 | 0.850392698 |
| pcaec361.pcaac344               | -0.022596737 | 0.119581157 | 0.850399351 |
| lysopcac161.smc161              | -0.016589001 | 0.087890906 | 0.850571706 |
| pcaac323.lysine                 | 0.012889391  | 0.068300754 | 0.850595294 |
| pcaac360.arginine               | -0.011303829 | 0.059908633 | 0.85061934  |
| smohc221.pcaec361               | -0.003607862 | 0.01912449  | 0.850645193 |
| pcaac426.c142                   | 0.00666064   | 0.035319069 | 0.850697297 |
| pcaec301.pcaac364               | -0.012672096 | 0.067232059 | 0.850777    |
| smc180.pcaec444                 | 0.019598538  | 0.103980592 | 0.850777225 |
| pcaac380.pcaac406               | -0.013121078 | 0.069630015 | 0.85081061  |
| pcaec340.asparticacid           | -0.010667028 | 0.056614958 | 0.850831243 |
| pcaac343.pcaac323               | 0.017029853  | 0.090400416 | 0.85085561  |
| smohc161.serotonin              | -0.017722154 | 0.094085061 | 0.850870747 |
| pcaec301.pcaec340               | 0.015739465  | 0.083585062 | 0.850916395 |
| pcaac421.pcaec384               | -0.003963383 | 0.021052823 | 0.850952217 |
| glycine.pcaec421                | 0.000453962  | 0.002411933 | 0.850986518 |
| pcaac342.c0                     | 0.000115585  | 0.000614189 | 0.851004827 |
| pcaac366.smc241                 | -0.002744832 | 0.014585801 | 0.85100995  |
| c16.taurine                     | 0.01656704   | 0.088037135 | 0.851012115 |
| smohc221.pcaac364               | 0.01047052   | 0.055664232 | 0.851075501 |
| lysopcac181.pcaac361            | -0.015530974 | 0.082574667 | 0.851089104 |
| pcaac343.pcaac361               | -0.011008962 | 0.05857839  | 0.851205249 |

|                                 |              |             |             |
|---------------------------------|--------------|-------------|-------------|
| smc160.pcaac364                 | -0.009733676 | 0.051795961 | 0.851214705 |
| pcaac405.pcaac300               | -0.020062348 | 0.106782436 | 0.851248247 |
| pcaec421.c0                     | 0.000426738  | 0.002271581 | 0.851264624 |
| lysopcac181.pcaec322            | 0.013946125  | 0.07425162  | 0.851293702 |
| c162.pcaac426                   | 0.009162285  | 0.048797744 | 0.851342274 |
| pcaac420.ornithine              | 0.004258708  | 0.022699123 | 0.851455651 |
| pcaac321.pcaac424               | -0.001501297 | 0.008006699 | 0.851541989 |
| pcaac403.pcaec380               | 0.028546494  | 0.15230824  | 0.851604092 |
| pcaac342.pcaec385               | 0.012110719  | 0.064633681 | 0.851644049 |
| pcaec420.prolinr                | -0.006829548 | 0.036450099 | 0.851650049 |
| c51dc.glycine                   | -0.004984254 | 0.026612644 | 0.851711171 |
| pcaec405.pcaec341               | -0.005049761 | 0.02697945  | 0.851803761 |
| smc160.pcaac341                 | 0.001807416  | 0.009662143 | 0.851889041 |
| c2.smohc222                     | 0.011940914  | 0.06390078  | 0.852041758 |
| prolinr.isoleucine              | 0.004034415  | 0.021647223 | 0.85242949  |
| pcaec424.pcaec384               | -0.005649061 | 0.030334417 | 0.852542898 |
| pcaac405.pcaac424               | -0.001196232 | 0.006424528 | 0.852565156 |
| lysopcac203.threonine           | 0.004203168  | 0.02257848  | 0.85259611  |
| pcaac421.creatinine             | 0.005474986  | 0.029410733 | 0.85259775  |
| asymmetricdimethylarginine.c4   | -0.003580342 | 0.019236772 | 0.852626193 |
| c14.lysopcac281                 | -0.002710939 | 0.014587058 | 0.852840809 |
| pcaac405.c16                    | -0.005723896 | 0.030803788 | 0.852862379 |
| pcaac341.pcaec383               | 0.017363822  | 0.0935454   | 0.853017938 |
| pcaec365.pcaec340               | 0.014131858  | 0.076187293 | 0.853120331 |
| lysopcac180.pcaec423            | 0.007228757  | 0.038977238 | 0.853141784 |
| smohc161.smc261                 | -0.010031879 | 0.054153897 | 0.853308815 |
| pcaec420.c101                   | -0.001732841 | 0.009359615 | 0.8533929   |
| pcaec425.transhydroxyproline    | 0.014173955  | 0.076559531 | 0.85339586  |
| glycine.phenylalanine           | -0.006954358 | 0.037602186 | 0.853545225 |
| pcaec383.pcaec343               | 0.016231541  | 0.087877654 | 0.853732688 |
| c0.pcaac424                     | 0.001171378  | 0.006342927 | 0.853757251 |
| c182.pcaac364                   | -0.008874379 | 0.04806058  | 0.853776743 |
| pcaac360.pcaac381               | -0.009719751 | 0.05264284  | 0.853787773 |
| smc161.pcaac343                 | -0.004113838 | 0.022282625 | 0.853799413 |
| alphaaminoadipicacid.glutamicac | -0.012858103 | 0.069655957 | 0.853820114 |
| pcaec402.pcaac322               | 0.010842959  | 0.058764451 | 0.853881826 |
| pcaec343.lysopcac281            | 0.008681104  | 0.04713148  | 0.854137477 |
| lysopcac160.tyrosine            | -0.011377986 | 0.061794273 | 0.854186185 |
| c5.pcaec363                     | 0.004845172  | 0.026320038 | 0.854217549 |
| pcaec362.pcaac421               | -0.005632691 | 0.030598155 | 0.854218199 |
| lysopcac182.pcaac420            | -0.022267552 | 0.121056807 | 0.854330155 |
| pcaac404.pcaec385               | 0.013534165  | 0.073610985 | 0.854394617 |
| pcaec300.pcaec420               | 0.005727784  | 0.031188976 | 0.854561366 |

|                         |              |             |             |
|-------------------------|--------------|-------------|-------------|
| c14.pcaac386            | 0.003370823  | 0.018362605 | 0.854622219 |
| lysopcac181.pcaac321    | 0.005599576  | 0.030515055 | 0.854675406 |
| pcaac321.lysopcac140    | -0.00030488  | 0.001662076 | 0.854729329 |
| pcaac240.pcaac404       | 0.003257779  | 0.017762543 | 0.854749643 |
| smohc161.pcaac343       | 0.004115798  | 0.022459387 | 0.854868782 |
| lysopcac204.pcaac360    | 0.005945644  | 0.032445951 | 0.854874624 |
| prolinr.pcaec342        | 0.020173085  | 0.110098783 | 0.85489069  |
| pcaec360.pcaac281       | 0.000378834  | 0.002068846 | 0.854979439 |
| pcaac366.pcaec406       | -0.009317971 | 0.050917276 | 0.855066882 |
| pcaac363.lysine         | 0.012234162  | 0.066860338 | 0.855083548 |
| c182.glutamine          | -0.004765889 | 0.026062362 | 0.855174441 |
| glycine.smc202          | 0.01031818   | 0.056425521 | 0.8551753   |
| lysopcac280.pcaac322    | 0.008997486  | 0.049227802 | 0.855246757 |
| pcaac343.ornithine      | -0.011959365 | 0.065449776 | 0.855283271 |
| pcaec382.pcaec341       | -0.011605893 | 0.063522146 | 0.8552986   |
| glutamicacid.prolinr    | -0.011843279 | 0.064831025 | 0.855319795 |
| pcaac403.c0             | -0.000268004 | 0.001467226 | 0.855334504 |
| c162.pcaec384           | -0.004409103 | 0.024140497 | 0.855347818 |
| asparticacid.pcaac300   | 0.010376723  | 0.056871198 | 0.855491407 |
| c142.isoleucine         | -0.002913735 | 0.015970102 | 0.855499806 |
| c12.pcaec364            | 0.003877947  | 0.021267867 | 0.855586751 |
| pcaec385.pcaec362       | 0.004190983  | 0.022984895 | 0.855588253 |
| pcaac360.pcaec444       | 0.018320256  | 0.100486957 | 0.855605212 |
| pcaec405.c16            | 0.004515423  | 0.024781283 | 0.855686451 |
| pcaec382.pcaec301       | 0.020751913  | 0.113896975 | 0.85569589  |
| pcaac420.creatinine     | -0.003525933 | 0.019357556 | 0.855736115 |
| pcaec361.kynurenine     | -0.001457119 | 0.008002997 | 0.85579564  |
| pcaec360.pcaac384       | -0.016261181 | 0.089331419 | 0.855826645 |
| pcaac422.c101           | 0.004437174  | 0.024384736 | 0.855878991 |
| pcaac341.pcaec361       | 0.002736591  | 0.015049487 | 0.855977484 |
| smc240.lysopcac181      | 0.007333472  | 0.040345043 | 0.856032795 |
| c10.c102                | -0.006469327 | 0.035648664 | 0.85626329  |
| c16.c4                  | 0.006490172  | 0.035778369 | 0.856322242 |
| kynurenine.pcaec401     | 0.005728784  | 0.031590558 | 0.856364937 |
| pcaec420.pcaec341       | 0.011385878  | 0.062817445 | 0.85643653  |
| c102.smohc161           | -0.002254009 | 0.012440613 | 0.856492893 |
| smc241.pcaac420         | -0.014990616 | 0.08276301  | 0.856535578 |
| pcaec365.pcaec380       | 0.012508856  | 0.069079276 | 0.856572612 |
| c4.serotonin            | -0.016974471 | 0.093740922 | 0.856573531 |
| smohc221.acetylnithoine | -0.016523839 | 0.091267662 | 0.856597372 |
| smc240.pcaac426         | 0.005969543  | 0.032973826 | 0.856604652 |
| phenylalanine.pcaac320  | 0.012199993  | 0.067459811 | 0.856753902 |
| c51dc.tryptophan        | 0.000764567  | 0.004227673 | 0.856753975 |

|                                |              |             |             |
|--------------------------------|--------------|-------------|-------------|
| glycine.pcaec384               | -0.003659031 | 0.02023678  | 0.856783205 |
| pcaac402.c5                    | -0.00588013  | 0.03252868  | 0.856817166 |
| c51.pcaac402                   | -0.005757178 | 0.031865892 | 0.856894408 |
| pcaac402.c8                    | 0.01064889   | 0.058960199 | 0.85693943  |
| pcaec321.asymmetricdimethylar; | 0.005877396  | 0.032566841 | 0.857048883 |
| creatinine.methioninesulfoxide | 0.006610801  | 0.036648669 | 0.857118366 |
| pcaac401.pcaec445              | -0.022103188 | 0.122560881 | 0.857148575 |
| smohc222.lysopcac170           | -0.002392641 | 0.013271284 | 0.857193618 |
| pcaac240.c101                  | 0.002868327  | 0.015914068 | 0.857231688 |
| c12.pcaac426                   | -0.009911784 | 0.054996093 | 0.857240635 |
| c141oh.pcaec342                | -0.014392603 | 0.079879872 | 0.857279003 |
| pcaac401.lysopcac203           | -0.005892521 | 0.032739778 | 0.857433846 |
| pcaac364.histidine             | -0.009980482 | 0.05546182  | 0.857455923 |
| pcaec445.pcaac405              | 0.015436381  | 0.085812626 | 0.857508858 |
| c14.pcaec446                   | -0.006129783 | 0.03409329  | 0.857579639 |
| pcaec404.pcaec420              | -0.005530951 | 0.030786412 | 0.85768841  |
| smc160.lysopcac161             | -0.01515936  | 0.084409091 | 0.85773673  |
| smc181.taurine                 | -0.010216649 | 0.056969723 | 0.857939853 |
| lysopcac181.c5                 | -0.002385359 | 0.01330652  | 0.857996525 |
| asparagine.smc241              | -0.003905334 | 0.021843629 | 0.858369898 |
| kynurenine.pcaac360            | 0.006064135  | 0.03393259  | 0.858428465 |
| lysopcac204.kynurenine         | -0.002336802 | 0.013089991 | 0.858579753 |
| smc240.c4                      | -0.002807995 | 0.015733136 | 0.858612447 |
| pcaac344.pcaac425              | -0.022870118 | 0.128187173 | 0.858663053 |
| pcaec300.pcaec363              | 0.010171278  | 0.057082788 | 0.858841156 |
| smohc221.smc241                | -0.002771512 | 0.015556991 | 0.858866609 |
| pcaac240.arginine              | -0.007301204 | 0.041010152 | 0.858959211 |
| c16.c14                        | 0.011802126  | 0.066319569 | 0.859018494 |
| lysopcac182.pcaac343           | -0.00409906  | 0.023035122 | 0.859026456 |
| pcaac401.smc260                | 0.007322838  | 0.041154512 | 0.859036671 |
| lysopcac182.pcaac363           | -0.002146065 | 0.012061271 | 0.859040569 |
| lysopcac160.pcaec382           | 0.001568115  | 0.008815116 | 0.85907267  |
| c5.histidine                   | 0.019293129  | 0.108461949 | 0.859080562 |
| pcaac281.c8                    | -0.009194639 | 0.051707858 | 0.85912779  |
| pcaac403.c16                   | 0.002953038  | 0.016607143 | 0.859129092 |
| lysopcac180.pcaac403           | -0.003204557 | 0.018025951 | 0.859162564 |
| pcaec422.pcaec361              | 0.004280554  | 0.024084128 | 0.859194882 |
| pcaec382.smc161                | 0.021218527  | 0.119416021 | 0.859232213 |
| lysopcac280.pcaec342           | -0.014678259 | 0.082619286 | 0.859251309 |
| smc240.pcaec322                | 0.012573885  | 0.070791644 | 0.859285167 |
| c5.c182                        | -0.012366439 | 0.069649925 | 0.859337573 |
| lysopcac180.histidine          | -0.007855467 | 0.044243978 | 0.859339542 |
| c14.c4                         | -0.00442896  | 0.024946716 | 0.859348999 |

|                              |              |             |             |
|------------------------------|--------------|-------------|-------------|
| pcaac425.acetylmethionine    | 0.01178158   | 0.066395387 | 0.859420356 |
| spermidine.c3                | 0.028436189  | 0.160308008 | 0.859468211 |
| lysopcac140.leucine          | 0.002144006  | 0.012098105 | 0.859598652 |
| pcaec383.lysopcac281         | -0.003719414 | 0.020988679 | 0.859604777 |
| serotonin.pcaac402           | -0.004157524 | 0.023468533 | 0.859649737 |
| pcaac343.pcaec363            | -0.006662402 | 0.03762357  | 0.859706666 |
| pcaec443.c141oh              | 0.015737101  | 0.088907848 | 0.859766166 |
| pcaac360.pcaac281            | 0.000337542  | 0.00190732  | 0.859791966 |
| pcaec406.smc241              | -0.003912581 | 0.022117246 | 0.859846755 |
| pcaec381.c3                  | 0.009099907  | 0.051458968 | 0.859896712 |
| c51dc.smc161                 | 0.014648325  | 0.082844313 | 0.859912863 |
| smc181.pcaec321              | 0.013286075  | 0.07520546  | 0.860033454 |
| pcaac426.glycine             | 0.010009776  | 0.056664195 | 0.860043553 |
| pcaec300.threonine           | 0.004610936  | 0.026130809 | 0.860196346 |
| pcaec300.isoleucine          | 0.004701523  | 0.026654234 | 0.860248558 |
| c2.c182                      | -0.005760793 | 0.032670468 | 0.860294867 |
| smohc221.pcaac365            | 0.010810576  | 0.061312327 | 0.8603031   |
| serine.pcaac425              | 0.013409762  | 0.076064618 | 0.860323038 |
| methioninesulfoxide.pcaac343 | 0.003079848  | 0.017487264 | 0.86046012  |
| citruline.smc241             | -0.001053735 | 0.005984407 | 0.86049103  |
| pcaac342.pcaac405            | -0.008407917 | 0.047751156 | 0.860492849 |
| c12.smc181                   | -0.004156715 | 0.023612448 | 0.860523127 |
| pcaac321.pcaac421            | 0.002585756  | 0.01469114  | 0.860547699 |
| pcaec340.c142                | -0.009882556 | 0.056194186 | 0.860660172 |
| pcaec340.c51dc               | -0.023848477 | 0.135682384 | 0.860736576 |
| phenylalanine.pcaac406       | -0.010829487 | 0.061648268 | 0.860815951 |
| smc160.arginine              | -0.007062356 | 0.040213734 | 0.8608514   |
| pcaac424.pcaec363            | 0.007560605  | 0.043053134 | 0.860858842 |
| c5.lysopcac140               | -0.000771612 | 0.004394433 | 0.860876475 |
| pcaec301.isoleucine          | -0.003202547 | 0.018254713 | 0.860995538 |
| pcaec405.pcaec420            | -0.006533643 | 0.037259827 | 0.861060737 |
| pcaec365.pcaec425            | 0.007299911  | 0.041653013 | 0.861137789 |
| arginine.pcaec321            | -0.002589086 | 0.014775534 | 0.861159261 |
| pcaec420.lysopcac161         | -0.014666179 | 0.083706965 | 0.861174424 |
| lysopcac280.threonine        | -0.005509315 | 0.031471152 | 0.861291559 |
| pcaec361.pcaac403            | 0.003923192  | 0.022446305 | 0.86150959  |
| pcaac341.pcaac344            | 0.013763726  | 0.078757534 | 0.861525635 |
| serotonin.pcaac425           | 0.016766508  | 0.095942246 | 0.861529158 |
| pcaec384.c102                | 0.004475505  | 0.025628807 | 0.861629817 |
| lysopcac160.c16              | 0.006077349  | 0.034824782 | 0.861720588 |
| pcaec380.pcaac343            | 0.009138505  | 0.052368957 | 0.861728309 |
| pcaec360.pcaac406            | -0.011985337 | 0.068703986 | 0.861770196 |
| pcaac366.pcaac386            | 0.003813626  | 0.021865526 | 0.861798593 |

|                        |              |             |             |
|------------------------|--------------|-------------|-------------|
| pcaec360.pcaec403      | -0.002338808 | 0.0134194   | 0.861898334 |
| pcaec365.pcaec281      | 0.000279752  | 0.001605763 | 0.861951817 |
| pcaac321.phenylalanine | -0.009414035 | 0.054038127 | 0.861956821 |
| c162.pcaac360          | -0.002995468 | 0.017197977 | 0.861984594 |
| pcaac364.pcaac240      | -0.004819385 | 0.027701039 | 0.862139186 |
| pcaac344.lysopcac281   | 0.001763862  | 0.010144084 | 0.862215771 |
| pcaac384.phenylalanine | -0.008560009 | 0.049258855 | 0.862297989 |
| histidine.c101         | 0.003422085  | 0.019692943 | 0.862301027 |
| smc161.c5              | -0.001256149 | 0.007232407 | 0.86237064  |
| serotonin.pcaac385     | -0.007584277 | 0.043668508 | 0.862374563 |
| pcaec405.lysopcac140   | -0.000671797 | 0.003868168 | 0.862378669 |
| smc260.lysopcac204     | -0.003125854 | 0.018001486 | 0.862401367 |
| lysopcac160.smc260     | -0.007049242 | 0.040608817 | 0.862444747 |
| c0.pcaec444            | -0.009705973 | 0.055963146 | 0.862565435 |
| glycine.pcaac361       | -0.005130253 | 0.029586355 | 0.862593522 |
| pcaac300.c162          | -0.013848189 | 0.07992088  | 0.862692019 |
| glycine.lysopcac140    | -0.000180737 | 0.001043493 | 0.862747051 |
| pcaec423.lysopcac140   | 0.000353155  | 0.002038999 | 0.862749602 |
| pcaac384.pcaec384      | 0.015313026  | 0.088496385 | 0.86287882  |
| pcaec386.threonine     | -0.00656635  | 0.037966973 | 0.862946767 |
| serine.pcaac383        | -0.001458829 | 0.008443959 | 0.863090383 |
| pcaac360.pcaac420      | -0.032930895 | 0.190612639 | 0.863092349 |
| glutamine.prolinr      | -0.005577277 | 0.032296836 | 0.863151501 |
| smc160.asparagine      | -0.001545909 | 0.008954609 | 0.863190502 |
| pcaec361.tyrosine      | -0.011111136 | 0.064374687 | 0.86321978  |
| pcaec403.smc161        | 0.01806737   | 0.104680417 | 0.863224097 |
| pcaec425.glycine       | 0.003273173  | 0.01898832  | 0.863394557 |
| serine.pcaac424        | -0.002173041 | 0.012606542 | 0.863397811 |
| smohc221.pcaac381      | 0.006434663  | 0.037330697 | 0.863401653 |
| lysopcac180.pcaec360   | 0.001028257  | 0.005965625 | 0.863405939 |
| putrescine.c141        | 0.005569798  | 0.032326683 | 0.863458126 |
| pcaec300.lysopcac180   | -0.008293986 | 0.048151696 | 0.86349752  |
| c0.pcaec422            | 0.004288009  | 0.024899069 | 0.863522156 |
| c14.smc240             | -0.004366924 | 0.025375041 | 0.863616611 |
| pcaec421.pcaec401      | 0.010025794  | 0.058303241 | 0.863723148 |
| pcaec362.pcaec422      | -0.004242398 | 0.024687587 | 0.863814237 |
| methionine.c4          | 0.002102904  | 0.012247695 | 0.863928367 |
| pcaec403.taurine       | 0.01225815   | 0.071399502 | 0.863939328 |
| methionine.smohc241    | -0.015123401 | 0.088144858 | 0.864025309 |
| pcaec300.pcaac384      | 0.011626058  | 0.067766801 | 0.864036776 |
| smc241.pcaec363        | 0.007094516  | 0.041356418 | 0.864047824 |
| lysopcac140.pcaec364   | -0.003146232 | 0.018345613 | 0.864085443 |
| pcaac360.pcaec385      | 0.012596296  | 0.07345059  | 0.864088814 |



|                                 |              |             |             |
|---------------------------------|--------------|-------------|-------------|
| smc241.ornithine                | 0.005849969  | 0.034178617 | 0.864351499 |
| methioninesulfoxide.c3          | 0.009135158  | 0.053399613 | 0.864419862 |
| pcaec402.c162                   | -0.017541125 | 0.102583362 | 0.864480885 |
| pcaec425.pcaec385               | -0.0126153   | 0.073790586 | 0.864506798 |
| serotonin.pcaac344              | -0.011355998 | 0.066428399 | 0.86451456  |
| phenylalanine.methioninesulfoxi | -0.004046116 | 0.023670927 | 0.864529509 |
| pcaec446.methionine             | -0.005091695 | 0.029798396 | 0.864576946 |
| phenylalanine.c142              | 0.010831759  | 0.063471138 | 0.864745682 |
| c162.pcaec364                   | 0.003142766  | 0.018422423 | 0.864794214 |
| smc261.smohc222                 | -0.00055528  | 0.003255322 | 0.86480877  |
| serotonin.pcaec384              | -0.003873748 | 0.022717442 | 0.864853811 |
| c141.methionine                 | 0.007064304  | 0.041428818 | 0.864855396 |
| pcaac421.pcaec343               | 0.017640703  | 0.103471744 | 0.864877798 |
| c16.c0                          | 0.000192787  | 0.001130799 | 0.864878335 |
| pcaec301.pcaac321               | 0.002604666  | 0.015278546 | 0.864885211 |
| pcaec362.isoleucine             | 0.004659334  | 0.027336039 | 0.864910401 |
| smohc221.lysine                 | 0.008030212  | 0.047121504 | 0.864935172 |
| c2.c0                           | -0.000795878 | 0.004671174 | 0.864962048 |
| pcaac420.pcaec386               | 0.001086274  | 0.006375674 | 0.864964277 |
| pcaec444.pcaec321               | 0.003630998  | 0.02131755  | 0.865002667 |
| pcaac323.c51dc                  | -0.022631928 | 0.132913125 | 0.865044211 |
| pcaac342.ornithine              | 0.011827557  | 0.069492894 | 0.865105442 |
| smc161.smc240                   | 0.013457017  | 0.079138294 | 0.865226133 |
| pcaac363.c2                     | -0.017240759 | 0.101523278 | 0.865401619 |
| pcaac383.pcaac424               | -0.001469043 | 0.008655157 | 0.865472609 |
| pcaec361.prolinr                | -0.006781793 | 0.039975565 | 0.865536862 |
| pcaec343.acetylorlithoine       | 0.016703128  | 0.098538632 | 0.865646786 |
| smohc161.pcaec386               | 0.002135557  | 0.012608007 | 0.865746784 |
| lysopcac161.phenylalanine       | -0.007729446 | 0.045648479 | 0.865790483 |
| c182.pcaec341                   | -0.005413198 | 0.031994184 | 0.865894251 |
| pcaac320.c141                   | 0.007273719  | 0.04299637  | 0.865912022 |
| smc180.pcaac381                 | 0.006953108  | 0.041104428 | 0.865922533 |
| c0.smc160                       | -0.012892387 | 0.076222084 | 0.865934108 |
| pcaec405.smc202                 | 0.01301973   | 0.076986775 | 0.865954488 |
| pcaac405.alanine                | 0.012924841  | 0.076445049 | 0.865988119 |
| pcaac385.pcaac341               | 0.00134264   | 0.00794347  | 0.866026748 |
| lysopcac281.pcaac343            | 0.006287788  | 0.037238043 | 0.866160631 |
| smohc241.c162                   | -0.015126351 | 0.089616132 | 0.866210384 |
| c18.pcaac364                    | -0.008299921 | 0.049173413 | 0.866211722 |
| pcaec385.taurine                | -0.006111378 | 0.03622891  | 0.866290939 |
| pcaac421.pcaac300               | -0.012075697 | 0.071589355 | 0.86629708  |
| c51dc.pcaac321                  | 0.009816782  | 0.058206079 | 0.866316277 |
| pcaac383.pcaac386               | -0.00336412  | 0.019955744 | 0.866376384 |

|                              |              |             |             |
|------------------------------|--------------|-------------|-------------|
| pcaac360.threonine           | 0.005383902  | 0.031937893 | 0.866380255 |
| c5.leucine                   | -0.003139441 | 0.018631704 | 0.866438485 |
| pcaec444.methioninesulfoxide | -0.003159702 | 0.018753579 | 0.866450001 |
| pcaac364.smohc241            | 0.014524288  | 0.086206494 | 0.866452167 |
| pcaac341.lysine              | 0.013706304  | 0.081458958 | 0.866626701 |
| pcaac342.h1                  | 0.000355196  | 0.00211132  | 0.86664714  |
| c142.c8                      | 0.01160188   | 0.068987596 | 0.866694861 |
| lysopcac170.lysopcac204      | 0.005094489  | 0.030301447 | 0.866731364 |
| pcaac361.pcaec341            | 0.014616096  | 0.086940649 | 0.866740115 |
| pcaec421.pcaec446            | -0.012316885 | 0.073274638 | 0.866758749 |
| pcaec405.lysopcac204         | 0.01258565   | 0.074880282 | 0.866770601 |
| lysopcac180.lysopcac160      | 0.004676286  | 0.027827535 | 0.86679548  |
| pcaec364.pcaac321            | 0.005068974  | 0.030167673 | 0.866810072 |
| c51.pcaec445                 | -0.011844651 | 0.070504086 | 0.866831423 |
| serine.c2                    | 0.011590694  | 0.069001622 | 0.86684899  |
| pcaac344.smc241              | 0.005111286  | 0.030436727 | 0.866884799 |
| glutamine.pcaec420           | -0.004988464 | 0.02971578  | 0.866931101 |
| pcaec382.c0                  | -0.000236859 | 0.001413014 | 0.867124266 |
| pcaec343.pcaac343            | -0.006910974 | 0.041235638 | 0.867147376 |
| c12.pcaec446                 | 0.007417847  | 0.04427687  | 0.867197557 |
| pcaac384.lysopcac281         | 0.002463828  | 0.014708297 | 0.8672136   |
| smc181.pcaac424              | 0.004092465  | 0.024432124 | 0.867220931 |
| pcaec446.arginine            | 0.006335472  | 0.037829139 | 0.867242509 |
| pcaec385.pcaac240            | -0.003192371 | 0.019073926 | 0.867327057 |
| pcaec340.pcaac300            | -0.019291337 | 0.115349105 | 0.867425416 |
| pcaec386.pcaec322            | 0.021813301  | 0.130497363 | 0.867494478 |
| c2.pcaec421                  | 0.001902846  | 0.011390439 | 0.867571953 |
| pcaec404.pcaec445            | -0.010278068 | 0.061560406 | 0.867648439 |
| smc160.pcaac323              | 0.015700257  | 0.09403955  | 0.867652595 |
| smohc241.pcaec342            | 0.016161783  | 0.096813007 | 0.867664875 |
| glutamicacid.smc260          | -0.011862815 | 0.071070737 | 0.867682573 |
| pcaec340.lysopcac140         | 0.000149444  | 0.000895419 | 0.867696193 |
| pcaac402.smohc222            | 0.00438946   | 0.026322009 | 0.867804706 |
| lysopcac181.pcaec301         | -0.005602425 | 0.033596603 | 0.867808158 |
| lysopcac204.pcaec421         | -0.001623044 | 0.009733815 | 0.867818273 |
| pcaec365.pcaec301            | -0.016293989 | 0.097770605 | 0.867887003 |
| methioninesulfoxide.pcaec321 | 0.005253755  | 0.031552662 | 0.86800306  |
| smc202.methionine            | -0.003791195 | 0.022772674 | 0.868024652 |
| pcaec364.lysopcac281         | 0.002792543  | 0.01677634  | 0.868042554 |
| smohc241.pcaec301            | 0.010852657  | 0.065209351 | 0.868065576 |
| smc260.pcaac321              | 0.004023851  | 0.024187686 | 0.868119341 |
| c142.h1                      | -0.000936068 | 0.005627324 | 0.868131956 |
| methioninesulfoxide.c8       | 0.015792873  | 0.09503865  | 0.86826567  |

|                                |              |             |             |
|--------------------------------|--------------|-------------|-------------|
| pcaec403.pcaac320              | 0.016369316  | 0.098743485 | 0.868577493 |
| lysopcac281.c162               | -0.015692343 | 0.09467972  | 0.868604854 |
| pcaec443.pcaac420              | 0.017745227  | 0.107094997 | 0.868640356 |
| glutamicacid.pcaec360          | 0.001277012  | 0.007709031 | 0.868675467 |
| pcaac424.pcaac360              | -0.011746332 | 0.070916315 | 0.868687178 |
| lysopcac161.smohc161           | 0.004356872  | 0.02631803  | 0.868757453 |
| pcaec406.smc161                | 0.024770778  | 0.149678958 | 0.868800137 |
| c14.pcaac426                   | 0.012824052  | 0.077500162 | 0.868816973 |
| smohc141.c142                  | -0.010540514 | 0.063703314 | 0.868823823 |
| pcaac422.spermidine            | -0.011268239 | 0.068123301 | 0.868865533 |
| kynurenine.pcaac420            | 0.019335209  | 0.116906764 | 0.868880833 |
| c162.leucine                   | -0.001463039 | 0.008846373 | 0.868886366 |
| c0.pcaac363                    | 0.005144318  | 0.031124017 | 0.8689637   |
| pcaec443.pcaac323              | -0.011764741 | 0.071199664 | 0.869001872 |
| smohc141.pcaec420              | -0.003414589 | 0.020682899 | 0.869114613 |
| lysopcac281.arginine           | -0.006561754 | 0.039753639 | 0.869139705 |
| c2.pcaec446                    | 0.011558875  | 0.070041547 | 0.869164545 |
| c101.c162                      | -0.017070192 | 0.103459142 | 0.869191496 |
| pcaac381.smc260                | 0.007722887  | 0.046812937 | 0.869208135 |
| pcaac424.c181                  | -0.003370024 | 0.020457949 | 0.869399831 |
| pcaac363.lysopcac170           | -0.001524495 | 0.009261108 | 0.869491543 |
| h1.pcaec386                    | 0.001989229  | 0.01208943  | 0.869546359 |
| pcaec402.pcaec421              | -0.000898914 | 0.00546343  | 0.869554181 |
| c2.pcaac365                    | -0.009634737 | 0.058559901 | 0.869558091 |
| asymmetricdimethylarginine.c18 | -0.002619835 | 0.015938839 | 0.869683721 |
| pcaec385.pcaac426              | -0.007603244 | 0.046259217 | 0.869688651 |
| pcaec404.c142                  | 0.006829115  | 0.041552138 | 0.869697449 |
| smc202.c4                      | 0.003034082  | 0.018463817 | 0.869716833 |
| c16.spermidine                 | 0.011332326  | 0.068972528 | 0.86973555  |
| pcaec386.taurine               | -0.00636237  | 0.038736485 | 0.869778404 |
| pcaac321.c102                  | 0.007953603  | 0.048470527 | 0.869900922 |
| pcaac240.pcaac300              | -0.009872163 | 0.060202133 | 0.869985719 |
| pcaec386.smc241                | 0.010919452  | 0.06661979  | 0.870045897 |
| pcaec365.methionine            | -0.004543062 | 0.027720861 | 0.870062404 |
| pcaac406.smc241                | -0.002812995 | 0.017164544 | 0.87006393  |
| pcaec322.pcaac404              | -0.001238101 | 0.007556745 | 0.870098174 |
| pcaac421.pcaac343              | -0.003660802 | 0.022358746 | 0.87018483  |
| smohc141.c4                    | -0.003258923 | 0.019909058 | 0.870216074 |
| pcaac381.c3                    | 0.011558062  | 0.070636466 | 0.870265609 |
| asparagine.c51dc               | 0.021580693  | 0.131913898 | 0.870289651 |
| lysopcac170.pcaac402           | -0.010027675 | 0.061309572 | 0.870320097 |
| pcaec361.pcaec445              | -0.007413015 | 0.045324493 | 0.870323065 |
| c0.methionine                  | -0.005296531 | 0.032395306 | 0.870368194 |

|                         |              |             |             |
|-------------------------|--------------|-------------|-------------|
| c0.acetylmethionine     | -0.017320775 | 0.105954556 | 0.870386446 |
| pcaec404.lysopcac160    | -0.014702747 | 0.089995346 | 0.870466064 |
| pcaec362.c5             | 0.002602184  | 0.015935146 | 0.870524123 |
| c182.pcaec386           | 0.003135465  | 0.019203283 | 0.870540537 |
| pcaec424.c51            | -0.020729775 | 0.126990385 | 0.870570867 |
| pcaec364.c102           | 0.00419595   | 0.025707007 | 0.870584137 |
| c4.pcaac300             | -0.008594282 | 0.052667722 | 0.870617735 |
| pcaac405.tryptophan     | 0.001227642  | 0.007529733 | 0.870727798 |
| pcaec342.pcaac426       | -0.006451455 | 0.039589908 | 0.870792363 |
| lysopcac281.lysopcac140 | 0.000238475  | 0.001463918 | 0.870835766 |
| c3.h1                   | 0.000269927  | 0.001657337 | 0.870862276 |
| pcaac300.c14            | 0.00727365   | 0.044669867 | 0.870891237 |
| lysopcac182.pcaec301    | -0.007113352 | 0.043686467 | 0.870894304 |
| phenylalanine.pcaec361  | 0.000695765  | 0.00427347  | 0.870907731 |
| pcaac365.pcaec386       | 0.003177031  | 0.019524617 | 0.870979277 |
| isoleucine.pcaac422     | -0.008905598 | 0.054731518 | 0.87098318  |
| glycine.smc161          | 0.007153073  | 0.043974294 | 0.871021997 |
| pcaec404.pcaac343       | 0.003338053  | 0.020541407 | 0.871148738 |
| glutamicacid.pcaac406   | 0.013235537  | 0.081526875 | 0.871272836 |
| c51.isoleucine          | -0.00350291  | 0.021577877 | 0.871278868 |
| pcaec401.pcaac281       | -0.000438192 | 0.002699467 | 0.8712887   |
| c4.lysopcac280          | 0.002395125  | 0.014756111 | 0.87129765  |
| h1.arginine             | -0.009033429 | 0.055657287 | 0.871305195 |
| pcaac366.pcaac422       | -0.014201682 | 0.087506878 | 0.871314897 |
| c51.c8                  | -0.005865702 | 0.036154482 | 0.871355935 |
| pcaec421.spermidine     | 0.011132764  | 0.068646695 | 0.871407152 |
| pcaec444.c2             | -0.010249081 | 0.063199991 | 0.871411683 |
| c102.smc261             | 0.005252704  | 0.03239059  | 0.871412812 |
| lysopcac170.pcaec343    | 0.013939527  | 0.086007311 | 0.871486576 |
| h1.transhydroxyproline  | -0.003849501 | 0.023772147 | 0.871597    |
| creatinine.lysopcac281  | -0.002859677 | 0.017662697 | 0.871619285 |
| ornithine.c16           | 0.008916412  | 0.05511582  | 0.87172067  |
| c101.pcaec322           | -0.010892206 | 0.067338011 | 0.871737727 |
| pcaec384.glutamicacid   | 0.007297967  | 0.04519452  | 0.871954021 |
| pcaec443.c8             | -0.008597834 | 0.053263501 | 0.871999832 |
| smc161.ornithine        | -0.007918706 | 0.049071913 | 0.872040182 |
| pcaec362.smc261         | 0.00606931   | 0.037674462 | 0.87225293  |
| pcaec364.pcaac384       | -0.012031818 | 0.074701123 | 0.872278618 |
| c18.c3                  | -0.007649729 | 0.047533386 | 0.87238261  |
| pcaac361.c2             | -0.012020038 | 0.074711096 | 0.872419471 |
| pcaac366.pcaac360       | -0.01192786  | 0.074143101 | 0.872427896 |
| smc240.kynurenine       | -0.000974654 | 0.006064238 | 0.872549424 |
| spermidine.lysopcac160  | -0.010522681 | 0.065518904 | 0.872640888 |

|                                |              |             |             |
|--------------------------------|--------------|-------------|-------------|
| pcaac321.pcaec342              | -0.018324073 | 0.114131143 | 0.872682142 |
| c51.acetylnithoine             | -0.004051474 | 0.025239881 | 0.872708915 |
| pcaec402.pcaec422              | -0.005943774 | 0.037029205 | 0.872711176 |
| serotonin.c8                   | -0.009472171 | 0.059073328 | 0.872844726 |
| smohc161.lysopcac161           | 0.010316795  | 0.064356439 | 0.872875278 |
| c18.smc160                     | 0.011733625  | 0.073226544 | 0.872930152 |
| c12.pcaac365                   | 0.005739927  | 0.035822356 | 0.872933484 |
| pcaac281.pcaec401              | -0.011977912 | 0.074942776 | 0.873252406 |
| lysopcac160.pcaac363           | -0.002360721 | 0.014774803 | 0.873289543 |
| pcaec406.c4                    | -0.002409536 | 0.015081039 | 0.87329557  |
| smc161.c3                      | 0.003205978  | 0.020071492 | 0.873330628 |
| c4.smc260                      | -0.002585851 | 0.016194392 | 0.873371737 |
| pcaec384.valine                | -0.012063811 | 0.075591631 | 0.873437615 |
| leucine.pcaac385               | 0.007236416  | 0.045348868 | 0.873453146 |
| putrescine.methioninesulfoxide | -0.003557579 | 0.022297942 | 0.8734726   |
| pcaec384.pcaec362              | 0.009684919  | 0.060706803 | 0.873481586 |
| h1.pcaec362                    | -0.004108223 | 0.025763005 | 0.873539664 |
| c2.lysopcac281                 | -0.001915294 | 0.012012442 | 0.873555058 |
| c4.lysopcac181                 | 0.01037171   | 0.065058986 | 0.873572696 |
| pcaec404.c16                   | 0.003830605  | 0.024028558 | 0.873573681 |
| smc180.pcaac380                | 0.013515493  | 0.084809171 | 0.873617136 |
| pcaac403.pcaac364              | -0.012389938 | 0.077814815 | 0.873727373 |
| pcaac380.c182                  | -0.006181266 | 0.038838994 | 0.87378427  |
| pcaac405.tyrosine              | 0.008945072  | 0.056213033 | 0.873802314 |
| c101.lysopcac161               | -0.010489197 | 0.065952053 | 0.8738694   |
| pcaac386.c51dc                 | 0.019859611  | 0.124885769 | 0.873885566 |
| pcaac323.pcaac363              | -0.003540473 | 0.022265987 | 0.873896621 |
| pcaec343.pcaac425              | 0.015841895  | 0.099765585 | 0.874067241 |
| asparagine.lysine              | -0.013958352 | 0.087906784 | 0.874071442 |
| c12.kynurenine                 | 0.001318325  | 0.008304842 | 0.874106096 |
| pcaec364.glutamicacid          | 0.004703848  | 0.029648895 | 0.874176927 |
| lysopcac204.pcaec386           | 0.002880797  | 0.018166988 | 0.874238668 |
| c2.smc202                      | -0.005417054 | 0.034170209 | 0.874271462 |
| c3.c102                        | -0.003560589 | 0.022467473 | 0.874313916 |
| asparticacid.pcaec361          | 0.001634673  | 0.010315131 | 0.874317244 |
| pcaec381.acetylnithoine        | -0.008161916 | 0.051520315 | 0.874358106 |
| lysopcac203.pcaec446           | -0.006248754 | 0.039450188 | 0.874377969 |
| smc160.pcaac321                | 0.003105014  | 0.01960989  | 0.874422679 |
| smohc161.pcaac344              | -0.013156619 | 0.083096566 | 0.874430483 |
| c4.pcaac386                    | -0.004977769 | 0.031456603 | 0.874498783 |
| citruline.pcaec420             | 0.00314459   | 0.019896787 | 0.874653951 |
| pcaac362.pcaac366              | 0.014796397  | 0.093631978 | 0.874668075 |
| pcaec404.c8                    | 0.006330411  | 0.040075542 | 0.874719357 |

|                               |              |             |             |
|-------------------------------|--------------|-------------|-------------|
| pcaac362.c141                 | -0.004325059 | 0.027394254 | 0.87478227  |
| lysopcac170.creatinine        | -0.000870689 | 0.005518786 | 0.874871806 |
| lysopcac182.pcaac380          | 0.009277253  | 0.058836519 | 0.874942323 |
| pcaac361.pcaac343             | 0.002830273  | 0.017953771 | 0.874970802 |
| pcaac240.threonine            | 0.004026933  | 0.025565815 | 0.875072948 |
| c141.pcaac422                 | -0.009977786 | 0.063355127 | 0.875090727 |
| smc260.pcaec443               | -0.010045179 | 0.063783906 | 0.875092397 |
| pcaac384.pcaec380             | 0.007382657  | 0.046932463 | 0.875236994 |
| pcaec343.pcaac424             | -0.001871867 | 0.011902395 | 0.875265138 |
| pcaec401.c102                 | -0.004931815 | 0.031378366 | 0.875340336 |
| c102.pcaac341                 | -0.000946489 | 0.006022424 | 0.875349439 |
| pcaac320.pcaec342             | 0.021097971  | 0.134269993 | 0.875372989 |
| smc202.histidine              | -0.00977898  | 0.062252785 | 0.875409106 |
| smc261.smohc241               | -0.010929109 | 0.069580078 | 0.875419043 |
| glutamine.pcaec443            | -0.014230047 | 0.090628498 | 0.875464074 |
| smohc221.pcaec363             | -0.00539835  | 0.034382996 | 0.875470964 |
| lysopcac180.pcaac385          | -0.003026523 | 0.019280599 | 0.875497653 |
| lysopcac281.pcaec340          | -0.013764481 | 0.087707105 | 0.875525628 |
| c142.pcaec342                 | 0.009236641  | 0.058891679 | 0.875600915 |
| citruline.transhydroxyproline | -0.004649878 | 0.029660345 | 0.875656237 |
| pcaac424.pcaec403             | 0.025696036  | 0.163918706 | 0.875664106 |
| smohc141.pcaac424             | 0.001474746  | 0.009417339 | 0.875791408 |
| lysopcac161.smohc241          | -0.013447855 | 0.085893266 | 0.875818395 |
| histidine.pcaec341            | -0.007379398 | 0.047143459 | 0.875845161 |
| pcaac402.lysopcac281          | -0.003086806 | 0.019722358 | 0.875859056 |
| smohc221.pcaec402             | -0.013457432 | 0.085988632 | 0.875867374 |
| lysopcac160.c4                | 0.002813151  | 0.017976363 | 0.875875852 |
| pcaec443.valine               | -0.007558027 | 0.048313245 | 0.87591808  |
| smohc222.smc180               | -0.01042524  | 0.06665876  | 0.875950218 |
| pcaec424.c51dc                | 0.021115215  | 0.135074767 | 0.876009    |
| pcaac281.pcaac425             | -0.016996957 | 0.108758185 | 0.876040727 |
| c141oh.pcaec341               | 0.008268916  | 0.052917435 | 0.876057548 |
| serine.threonine              | -0.003245368 | 0.020773506 | 0.876084616 |
| pcaec406.lysopcac140          | -0.000377625 | 0.002418098 | 0.876131902 |
| pcaac320.threonine            | 0.004179299  | 0.0267953   | 0.876285193 |
| lysopcac160.pcaac425          | -0.016772195 | 0.10754626  | 0.87629939  |
| acetylmithoine.smohc221       | -0.010023596 | 0.064359699 | 0.876464556 |
| alphaaminoadipicacid.smohc241 | 0.007351839  | 0.047226613 | 0.876521076 |
| smohc161.glycine              | 0.006428409  | 0.041306241 | 0.876555307 |
| pcaac240.ornithine            | 0.016095499  | 0.103425382 | 0.876558263 |
| pcaac383.tyrosine             | 0.011818376  | 0.075966951 | 0.876598917 |
| c5.c102                       | 0.007284198  | 0.046850176 | 0.8766729   |
| smc240.c102                   | -0.004823524 | 0.031032901 | 0.876709073 |

|                      |              |             |             |
|----------------------|--------------|-------------|-------------|
| pcaac402.c3          | -0.011901864 | 0.076643974 | 0.876823093 |
| pcaac425.c0          | 0.000169734  | 0.001093665 | 0.876893893 |
| pcaac425.taurine     | -0.006763578 | 0.043595256 | 0.876935492 |
| c181.pcaac406        | -0.00669136  | 0.043130021 | 0.876936205 |
| pcaac322.lysopcac281 | 0.0018303    | 0.011797724 | 0.876939224 |
| kynurenine.pcaec384  | -0.002696258 | 0.017382379 | 0.876959401 |
| pcaac384.alanine     | 0.011773259  | 0.075924642 | 0.876998256 |
| smohc161.pcaac341    | 0.002550687  | 0.016451745 | 0.877017559 |
| pcaec443.smohc161    | 0.002995855  | 0.019337036 | 0.877105837 |
| c5.c162              | 0.016839844  | 0.108764561 | 0.877184461 |
| pcaac366.pcaec360    | -0.000966706 | 0.006245249 | 0.877214191 |
| pcaac320.smc241      | 0.00198205   | 0.012806019 | 0.877226578 |
| smohc221.pcaec384    | -0.003952412 | 0.025550361 | 0.877292541 |
| leucine.lysopcac204  | -0.003939942 | 0.025476685 | 0.877325688 |
| pcaec405.smc160      | -0.006338661 | 0.041020024 | 0.87742241  |
| creatinine.smc260    | 0.002116157  | 0.013694521 | 0.87742259  |
| pcaac381.tyrosine    | -0.008023363 | 0.051976477 | 0.877548904 |
| pcaec380.pcaec385    | 0.008833617  | 0.057243314 | 0.877586882 |
| pcaac281.c102        | 0.005041004  | 0.032671728 | 0.877606137 |
| pcaac405.pcaac421    | -0.008608609 | 0.055796401 | 0.877611208 |
| pcaec364.lysopcac180 | 0.011962056  | 0.077655925 | 0.877805513 |
| pcaec420.pcaac321    | 0.007458301  | 0.048437931 | 0.877854882 |
| pcaec423.pcaec420    | -0.003243917 | 0.021079801 | 0.877924938 |
| pcaac343.smc260      | 0.004476554  | 0.029101175 | 0.877972307 |
| pcaac404.pcaac421    | 0.003549094  | 0.02308432  | 0.878037202 |
| lysopcac140.pcaac426 | -0.007616471 | 0.049545896 | 0.878052332 |
| pcaec425.c141oh      | 0.014210444  | 0.092460246 | 0.878078379 |
| pcaec301.pcaec343    | -0.011044736 | 0.071873696 | 0.878097107 |
| smc240.pcaec321      | -0.001639058 | 0.010668738 | 0.87812609  |
| pcaac322.pcaac240    | -0.003451839 | 0.022469357 | 0.878132031 |
| pcaac366.ornithine   | 0.006525781  | 0.042485755 | 0.87815174  |
| pcaac403.lysopcac281 | -0.002866473 | 0.018663357 | 0.878160366 |
| c2.smc260            | 0.003539822  | 0.023053407 | 0.878191478 |
| pcaec383.pcaec385    | 0.01239223   | 0.080712797 | 0.878202406 |
| pcaec405.pcaac323    | 0.008219824  | 0.053691463 | 0.878549651 |
| lysopcac182.pcaac401 | 0.000753569  | 0.00492356  | 0.878581127 |
| lysopcac281.tyrosine | 0.01173305   | 0.07670516  | 0.878652531 |
| smc180.smohc221      | 0.01492005   | 0.097555441 | 0.878671254 |
| pcaac323.pcaec384    | 0.003687528  | 0.024112699 | 0.87867936  |
| pcaec360.smc241      | 0.001893462  | 0.012381516 | 0.878681237 |
| pcaec401.pcaec363    | 0.004484319  | 0.029349226 | 0.878787327 |
| pcaac426.pcaac344    | -0.013964744 | 0.091422292 | 0.878820266 |
| lysine.threonine     | 0.00318705   | 0.020865887 | 0.878828262 |

|                                |              |             |             |
|--------------------------------|--------------|-------------|-------------|
| pcaac425.methioninesulfoxide   | 0.005795566  | 0.037991294 | 0.878977713 |
| lysine.lysopcac281             | -0.001236544 | 0.008116942 | 0.879142046 |
| alphaaminoadipicacid.threonine | 0.009327995  | 0.061246833 | 0.879173077 |
| arginine.c162                  | 0.014431482  | 0.094916725 | 0.879376218 |
| histidine.lysopcac203          | 0.004674918  | 0.03074837  | 0.879380713 |
| lysopcac170.pcaac406           | -0.007134466 | 0.046950482 | 0.879444203 |
| c12.acetylmithoine             | -0.017058375 | 0.112258857 | 0.879445413 |
| pcaac281.pcaec364              | -0.003825675 | 0.025186073 | 0.879492079 |
| prolinr.pcaec341               | 0.005456616  | 0.035937378 | 0.879539036 |
| pcaac386.pcaec364              | 0.005427314  | 0.035805622 | 0.879743434 |
| kynurenine.citruline           | 0.00737992   | 0.048705885 | 0.87978835  |
| pcaec381.c0                    | -0.000199653 | 0.001317689 | 0.879790507 |
| pcaec424.smc261                | 0.009346225  | 0.061685529 | 0.879793105 |
| pcaac365.lysopcac281           | -0.003238008 | 0.021383273 | 0.879861518 |
| pcaac422.c4                    | -0.00132999  | 0.008783274 | 0.879864767 |
| pcaec301.c3                    | 0.007350534  | 0.04854696  | 0.879874395 |
| smohc221.c4                    | -0.002117057 | 0.013983664 | 0.879886834 |
| lysopcac281.c0                 | -0.000157303 | 0.00103913  | 0.879898843 |
| c18.pcaec386                   | 0.001262163  | 0.008337756 | 0.879899265 |
| pcaac364.pcaac281              | -0.00030456  | 0.002012234 | 0.87991912  |
| histidine.pcaec424             | 0.008782037  | 0.05810587  | 0.880088743 |
| pcaac361.tryptophan            | 0.000586274  | 0.003879635 | 0.880106583 |
| pcaac401.pcaec341              | -0.006361883 | 0.042108303 | 0.880131845 |
| leucine.pcaec422               | 0.006500969  | 0.043030438 | 0.880136121 |
| c16.pcaac343                   | -0.005655195 | 0.037453889 | 0.880205029 |
| glutamicacid.pcaec404          | 0.008907413  | 0.059046064 | 0.880311739 |
| pcaac401.lysopcac281           | 0.002126704  | 0.014104086 | 0.880366006 |
| c141.pcaac361                  | 0.005203781  | 0.034511343 | 0.880367385 |
| pcaec380.pcaec321              | -0.00333527  | 0.022122328 | 0.880382958 |
| smohc221.threonine             | -0.006098638 | 0.040457272 | 0.880400418 |
| c101.glycine                   | 0.004312891  | 0.028623784 | 0.880453659 |
| pcaac365.pcaac385              | -0.006209582 | 0.04125008  | 0.880563925 |
| smc181.methionine              | -0.003235275 | 0.021506225 | 0.880643217 |
| pcaec382.pcaac425              | 0.023868638  | 0.158698236 | 0.880668149 |
| smc160.smc261                  | 0.006795494  | 0.045215578 | 0.880756084 |
| pcaec363.c18                   | 0.004542755  | 0.030252702 | 0.880858989 |
| pcaac426.smc261                | -0.010670263 | 0.071068156 | 0.880873988 |
| pcaac420.phenylalanine         | 0.006124158  | 0.040794528 | 0.880889121 |
| lysopcac280.pcaec386           | 0.001281589  | 0.008537071 | 0.880890379 |
| pcaec301.pcaac402              | -0.007901748 | 0.052663132 | 0.880951153 |
| lysine.isoleucine              | 0.005224927  | 0.034881563 | 0.881150189 |
| smc161.pcaec422                | -0.006230625 | 0.041609703 | 0.881190192 |
| smc180.threonine               | -0.005515378 | 0.03683419  | 0.881193678 |



|                                  |              |             |             |
|----------------------------------|--------------|-------------|-------------|
| c16.leucine                      | -0.001490501 | 0.009956948 | 0.881225758 |
| c101.smc161                      | -0.009869643 | 0.065955386 | 0.881267771 |
| lysine.pcaac406                  | -0.00620874  | 0.041515146 | 0.881336744 |
| pcaac321.pcaac385                | -0.009138609 | 0.061126299 | 0.881376041 |
| pcaac380.pcaac380                | 0.011394925  | 0.076234863 | 0.881401556 |
| c10.pcaac384                     | 0.00708926   | 0.047470252 | 0.881504103 |
| glutamicacid.lysopcac170         | -0.002246002 | 0.01504072  | 0.881514366 |
| lysopcac180.c102                 | -0.00547441  | 0.036668336 | 0.881540179 |
| c10.pcaac240                     | -0.003040132 | 0.020371485 | 0.881587911 |
| prolinr.threonine                | 0.009148371  | 0.06130514  | 0.881594105 |
| pcaac365.pcaac364                | 0.010322054  | 0.069187444 | 0.881623344 |
| pcaac343.c18                     | 0.004970865  | 0.033326031 | 0.881647803 |
| c181.threonine                   | -0.004578122 | 0.030693137 | 0.881648444 |
| pcaac444.pcaac343                | 0.016099771  | 0.108017419 | 0.881735001 |
| c16.serotonin                    | -0.021412359 | 0.14372984  | 0.8817913   |
| pcaac425.glycine                 | 0.004085923  | 0.027434149 | 0.881823424 |
| c14.pcaac444                     | -0.017783135 | 0.119456652 | 0.881877607 |
| pcaac360.pcaac403                | 0.003398988  | 0.022836046 | 0.881896295 |
| pcaac383.pcaac340                | -0.009159473 | 0.061579648 | 0.881976027 |
| pcaac365.tyrosine                | 0.007984948  | 0.05370594  | 0.882025521 |
| lysopcac140.methioninesulfoxid   | -0.003085052 | 0.02075497  | 0.882055019 |
| pcaac344.pcaac342                | -0.017010472 | 0.114517963 | 0.882135218 |
| ornithine.c4                     | 0.001322883  | 0.008908573 | 0.882170131 |
| citruline.asymmetricdimethylargi | -0.003239055 | 0.021832947 | 0.882279748 |
| pcaac321.glycine                 | 0.014963896  | 0.100986981 | 0.882421362 |
| glutamicacid.isoleucine          | 0.00558624   | 0.037701446 | 0.882426122 |
| pcaac363.pcaac343                | -0.006422766 | 0.043353184 | 0.882442377 |
| serotonin.pcaac301               | 0.01645468   | 0.111073491 | 0.882448306 |
| creatinine.smc241                | 0.012434631  | 0.084095406 | 0.882667992 |
| pcaac443.pcaac445                | -0.011044548 | 0.074719654 | 0.882707553 |
| pcaac343.pcaac402                | -0.00447282  | 0.030314698 | 0.882917805 |
| smc180.lysopcac203               | 0.002350433  | 0.01593026  | 0.882918649 |
| smc180.pcaac386                  | 0.001368816  | 0.009278497 | 0.882934067 |
| lysopcac180.c14                  | 0.005296634  | 0.03590676  | 0.882945754 |
| pcaac446.lysopcac140             | -0.000395038 | 0.00267814  | 0.882950762 |
| pcaac321.smc180                  | -0.00329652  | 0.022349907 | 0.882957462 |
| lysopcac180.pcaac343             | 0.002421495  | 0.016425686 | 0.883016282 |
| lysopcac160.c0                   | -0.00044456  | 0.00301566  | 0.883019375 |
| smc260.c8                        | 0.005956387  | 0.040421483 | 0.883066912 |
| c16.c12                          | 0.005030756  | 0.034143019 | 0.883077414 |
| alanine.pcaac425                 | 0.010788505  | 0.073249602 | 0.883124274 |
| pcaac323.phenylalanine           | 0.005078211  | 0.034488876 | 0.88315748  |
| serotonin.pcaac323               | 0.013755038  | 0.093442136 | 0.883187569 |

|                                 |              |             |             |
|---------------------------------|--------------|-------------|-------------|
| pcaec365.serotonin              | 0.013795331  | 0.09379282  | 0.883282726 |
| lysopcac182.pcaec382            | -0.001334869 | 0.009080817 | 0.883349113 |
| pcaec446.smc202                 | 0.009657065  | 0.065695201 | 0.883349677 |
| lysopcac160.pcaec341            | -0.006731222 | 0.045803458 | 0.883380574 |
| pcaec444.smc161                 | 0.009451641  | 0.064326169 | 0.88340086  |
| pcaec386.pcaec445               | 0.010094499  | 0.068703667 | 0.883404772 |
| c2.pcaac364                     | 0.005867416  | 0.039936962 | 0.883413572 |
| c141oh.smc181                   | 0.002592276  | 0.017648577 | 0.883440301 |
| pcaec322.c162                   | 0.012506561  | 0.085211035 | 0.883528049 |
| pcaec321.pcaac321               | 0.005448627  | 0.037131627 | 0.88355441  |
| smohc161.pcaec401               | 0.004117717  | 0.028090003 | 0.883671048 |
| pcaec383.pcaec422               | -0.011399072 | 0.077878863 | 0.883845047 |
| pcaec341.pcaac320               | -0.015777349 | 0.107951732 | 0.88401632  |
| lysopcac170.pcaec401            | 0.010710906  | 0.073317743 | 0.884065978 |
| c18.smohc241                    | -0.011048516 | 0.075697936 | 0.884171198 |
| putrescine.methionine           | 0.005120571  | 0.035090186 | 0.884194279 |
| pcaac422.pcaec363               | -0.003975016 | 0.027246196 | 0.884220697 |
| lysopcac203.pcaac424            | -0.001603018 | 0.010988572 | 0.884230149 |
| pcaac344.methioninesulfoxide    | 0.003916635  | 0.026857695 | 0.884270607 |
| c141oh.pcaac402                 | -0.002527583 | 0.017334753 | 0.884285588 |
| methionine.serotonin            | 0.017208438  | 0.118036583 | 0.88430223  |
| pcaac361.pcaac381               | 0.005423875  | 0.037217788 | 0.884346047 |
| lysopcac161.c4                  | 0.002585291  | 0.017745636 | 0.884383412 |
| smohc241.smc241                 | -0.010309279 | 0.070789637 | 0.88442548  |
| pcaac401.c0                     | 0.000198778  | 0.001365046 | 0.884435171 |
| pcaac385.pcaac405               | 0.011331811  | 0.077833153 | 0.884458224 |
| pcaac344.pcaec364               | -0.001815907 | 0.012474752 | 0.884477525 |
| pcaac380.pcaac426               | -0.009335175 | 0.064131657 | 0.88448059  |
| smc161.lysopcac140              | 0.000294201  | 0.002021628 | 0.884508744 |
| pcaec365.pcaac344               | 0.006525241  | 0.044846273 | 0.884528076 |
| pcaec365.c162                   | -0.011743834 | 0.080724155 | 0.884544916 |
| lysopcac180.pcaec340            | 0.00926157   | 0.063676117 | 0.884570866 |
| pcaec383.pcaec301               | 0.013168254  | 0.090590263 | 0.884639827 |
| pcaac363.histidine              | 0.00927662   | 0.063832039 | 0.884665042 |
| smc240.c141oh                   | -0.015530923 | 0.106884578 | 0.884683187 |
| lysopcac204.pcaac240            | -0.002991819 | 0.020593187 | 0.884701782 |
| ornithine.c3                    | 0.005077785  | 0.034957298 | 0.884721618 |
| pcaec381.pcaec420               | 0.005978864  | 0.041162661 | 0.884727215 |
| pcaec360.threonine              | 0.005596216  | 0.038537706 | 0.884755307 |
| asymmetricdimethylarginine.orn: | -0.002421868 | 0.016684442 | 0.88480005  |
| lysopcac281.pcaec361            | 0.00569757   | 0.039267722 | 0.884848712 |
| pcaec380.c51dc                  | 0.0211937    | 0.146072483 | 0.88485282  |
| c2.pcaac323                     | -0.008096206 | 0.055801603 | 0.88485374  |

|                                 |              |             |             |
|---------------------------------|--------------|-------------|-------------|
| c141oh.smc161                   | 0.006525287  | 0.044990694 | 0.884895306 |
| pcaec422.threonine              | -0.003724119 | 0.025709943 | 0.885041139 |
| pcaac300.pcaac381               | -0.006250813 | 0.043166394 | 0.885075753 |
| c102.serotonin                  | 0.003555302  | 0.024552486 | 0.885078322 |
| pcaec401.lysopcac161            | 0.011579605  | 0.079992189 | 0.88511374  |
| c181.pcaec422                   | -0.003700943 | 0.025584217 | 0.885194082 |
| pcaec420.c3                     | 0.003686693  | 0.025514923 | 0.885324593 |
| pcaac323.smc241                 | -0.002127075 | 0.014729339 | 0.885388353 |
| c0.lysopcac181                  | 0.006750812  | 0.046749015 | 0.885392535 |
| c51dc.c2                        | -0.011131624 | 0.077111494 | 0.8854303   |
| pcaec321.c8                     | 0.007062025  | 0.048928336 | 0.885448791 |
| c102.smc241                     | -0.003756736 | 0.026032739 | 0.885469211 |
| glutamicacid.pcaac386           | -0.005198093 | 0.036030599 | 0.885500184 |
| lysopcac161.spermidine          | -0.012242673 | 0.08490922  | 0.885565928 |
| asymmetricdimethylarginine.lysc | 0.001828258  | 0.012681933 | 0.88558409  |
| pcaac360.pcaac360               | -0.000540644 | 0.003751818 | 0.885631759 |
| methionine.smc240               | 0.00296071   | 0.020553956 | 0.885676035 |
| pcaac341.c3                     | -0.00541094  | 0.037570123 | 0.885694412 |
| lysopcac182.acetylmethionine    | -0.005590374 | 0.03882704  | 0.885726689 |
| citruline.histidine             | -0.007862364 | 0.054631676 | 0.885778402 |
| lysopcac181.pcaac320            | -0.010091498 | 0.070128416 | 0.88579068  |
| pcaec321.threonine              | -0.005370769 | 0.037365186 | 0.885919162 |
| pcaec386.lysopcac170            | -0.002661952 | 0.018534582 | 0.886010939 |
| c14.lysopcac181                 | -0.007830966 | 0.054526351 | 0.886013159 |
| asparagine.c4                   | 0.00111895   | 0.007793138 | 0.886041933 |
| serotonin.smc180                | 0.002077949  | 0.014474823 | 0.886061959 |
| lysopcac160.lysopcac140         | -0.000665718 | 0.004638531 | 0.886091025 |
| pcaec420.c141                   | 0.004672002  | 0.032590477 | 0.886220591 |
| c5.lysopcac181                  | 0.012578535  | 0.087765005 | 0.886247558 |
| pcaac321.pcaac425               | -0.011984601 | 0.083635144 | 0.886266786 |
| creatinine.pcaac421             | 0.001517581  | 0.010596075 | 0.886326018 |
| c102.pcaec322                   | -0.012877376 | 0.089936329 | 0.88635584  |
| pcaac240.lysopcac281            | -0.007374278 | 0.05150324  | 0.88635772  |
| pcaac422.pcaac361               | 0.00241537   | 0.016870901 | 0.88636799  |
| pcaec384.acetylmethionine       | 0.011113571  | 0.077636021 | 0.886382308 |
| smohc161.leucine                | -0.001492894 | 0.01042953  | 0.886389111 |
| pcaac362.h1                     | 0.000550076  | 0.003845501 | 0.886465612 |
| h1.smohc241                     | 0.003035007  | 0.021226352 | 0.886513708 |
| pcaec341.pcaac426               | 0.009486674  | 0.066366922 | 0.886545378 |
| smohc221.lysopcac140            | 0.000179671  | 0.001257576 | 0.886602077 |
| pcaac406.pcaac384               | -0.006949689 | 0.048648123 | 0.88661359  |
| c3.pcaec424                     | -0.003306087 | 0.023160423 | 0.886699509 |
| c141.glutamicacid               | -0.005851521 | 0.040998779 | 0.886717645 |

|                               |              |             |             |
|-------------------------------|--------------|-------------|-------------|
| pcaec421.pcaac344             | -0.015510519 | 0.108689173 | 0.886732609 |
| leucine.asparticacid          | 0.003430154  | 0.024046816 | 0.88678025  |
| smc202.smc241                 | -0.004236608 | 0.029707647 | 0.886807717 |
| pcaac300.isoleucine           | 0.004324819  | 0.030356543 | 0.886920106 |
| leucine.pcaec322              | -0.016965845 | 0.119118204 | 0.886950683 |
| pcaec403.c16                  | 0.00297019   | 0.020862307 | 0.886996059 |
| smc202.pcaec342               | -0.011992696 | 0.084258789 | 0.887027121 |
| c51.smc202                    | -0.004989497 | 0.035062974 | 0.887051292 |
| putrescine.pcaec405           | -0.007714835 | 0.054225508 | 0.88707326  |
| smc261.pcaec386               | 0.001797149  | 0.012638571 | 0.88713445  |
| c141oh.c162                   | -0.016694678 | 0.117441323 | 0.887167717 |
| lysopcac204.c4                | 0.001366392  | 0.009616923 | 0.887223935 |
| isoleucine.pcaec363           | 0.004742031  | 0.033376455 | 0.887227795 |
| c51.c2                        | 0.008324137  | 0.058624957 | 0.887296778 |
| pcaec343.pcaac323             | 0.017440981  | 0.122835332 | 0.887299117 |
| prolinr.pcaac404              | -0.001014468 | 0.00714488  | 0.887300149 |
| pcaec301.pcaec322             | -0.008493303 | 0.059834891 | 0.887331454 |
| c5.asparagine                 | 0.00413431   | 0.029146808 | 0.887411316 |
| lysopcac170.pcaec321          | -0.0064082   | 0.04521293  | 0.887498487 |
| lysopcac280.pcaec361          | 0.001577607  | 0.011136717 | 0.887558071 |
| pcaac402.pcaec301             | -0.013358534 | 0.094306899 | 0.887564875 |
| smohc161.pcaec402             | -0.007925642 | 0.055980422 | 0.887620673 |
| pcaec380.pcaec403             | -0.007187842 | 0.050785708 | 0.887656988 |
| c4.pcaac426                   | -0.007566538 | 0.0534962   | 0.887729608 |
| arginine.c142                 | -0.005881734 | 0.041591402 | 0.887748206 |
| lysopcac140.pcaec342          | -0.013523315 | 0.095670926 | 0.887799192 |
| c12.histidine                 | -0.008985485 | 0.063606986 | 0.887867554 |
| pcaec444.pcaec385             | -0.007657333 | 0.054306856 | 0.888076087 |
| phenylalanine.spermidine      | 0.010608917  | 0.075242497 | 0.888079934 |
| pcaac322.smc241               | -0.013124359 | 0.093092903 | 0.888091798 |
| pcaac365.pcaac281             | 0.000662269  | 0.004703589 | 0.888234132 |
| alphaaminoadipicacid.tyrosine | -0.010117099 | 0.071867114 | 0.888254407 |
| citruline.lysopcac181         | -0.00608938  | 0.043258313 | 0.888260104 |
| smc202.pcaec384               | 0.005977967  | 0.042469183 | 0.888266209 |
| pcaac420.pcaec444             | -0.019546721 | 0.138866148 | 0.888266741 |
| histidine.pcaac384            | -0.011658756 | 0.082845297 | 0.888290552 |
| pcaec404.acetylornithoine     | 0.011834426  | 0.084247869 | 0.888493774 |
| lysopcac161.pcaac320          | -0.01811085  | 0.129010847 | 0.888564062 |
| pcaec423.pcaec446             | -0.006356522 | 0.045297474 | 0.888606632 |
| pcaec382.c16                  | 0.003402987  | 0.024259997 | 0.888651473 |
| c181.c182                     | -0.010474897 | 0.074746665 | 0.888756263 |
| smc180.pcaac425               | 0.012155945  | 0.086762155 | 0.888781587 |
| pcaac363.pcaec363             | -0.006557019 | 0.046801823 | 0.888785329 |

|                                |              |             |             |
|--------------------------------|--------------|-------------|-------------|
| leucine.smc240                 | -0.004964945 | 0.03549833  | 0.888972709 |
| arginine.lysopcac281           | 0.001449408  | 0.010367177 | 0.889017494 |
| lysopcac281.pcaac321           | -0.00293408  | 0.020989424 | 0.889032409 |
| alphaaminoadipicacid.taurine   | 0.005094311  | 0.036450638 | 0.889055536 |
| citruline.pcaac422             | 0.009023014  | 0.064573143 | 0.889075985 |
| lysopcac203.smc260             | 0.005833664  | 0.041752505 | 0.889086346 |
| pcaec300.pcaac343              | 0.006758898  | 0.048377136 | 0.889092216 |
| kynurenine.pcaec422            | -0.004419904 | 0.031636558 | 0.889095281 |
| smc160.pcaec384                | -0.01555959  | 0.111516474 | 0.889238413 |
| pcaac300.smc260                | 0.004362928  | 0.031286424 | 0.889298445 |
| c4.pcaac421                    | 0.002865031  | 0.020590421 | 0.889540783 |
| pcaac323.pcaac380              | -0.013000538 | 0.093444496 | 0.889555071 |
| glutamicacid.smc202            | 0.012889507  | 0.092659292 | 0.889570298 |
| pcaac281.c0                    | 7.64E-05     | 0.000549362 | 0.889635022 |
| pcaec380.c3                    | 0.004699974  | 0.03382873  | 0.889706011 |
| pcaec386.lysopcac140           | -0.000209457 | 0.001508028 | 0.889737424 |
| pcaec343.smc241                | 0.002908476  | 0.020940949 | 0.889741496 |
| histidine.pcaec420             | 0.004208615  | 0.030307323 | 0.889761042 |
| c10.asymmetricdimethylarginine | 0.00174989   | 0.012601768 | 0.889764133 |
| pcaac384.c5                    | 0.000786286  | 0.005666314 | 0.889839653 |
| smc260.pcaec341                | -0.008909393 | 0.064242737 | 0.889904087 |
| pcaec361.pcaac421              | -0.002637488 | 0.019037239 | 0.890014215 |
| arginine.c8                    | -0.007836963 | 0.056581035 | 0.890041815 |
| c51dc.taurine                  | -0.008381355 | 0.060599179 | 0.890200032 |
| pcaec404.c51dc                 | -0.020686251 | 0.149579025 | 0.890209182 |
| pcaac364.pcaac421              | 0.004790991  | 0.034650999 | 0.890234683 |
| pcaec402.c51dc                 | 0.021067977  | 0.152393932 | 0.890248346 |
| pcaac320.pcaac384              | 0.011624519  | 0.084085732 | 0.890248968 |
| pcaec405.pcaac343              | 0.003735294  | 0.027021851 | 0.890259761 |
| smc161.threonine               | -0.00390725  | 0.02826986  | 0.890275348 |
| lysopcac180.c3                 | -0.004478851 | 0.032423507 | 0.890335831 |
| smc260.pcaac424                | 0.001471164  | 0.01065175  | 0.890352506 |
| lysopcac161.pcaac384           | 0.010301919  | 0.074600989 | 0.890369212 |
| c2.pcaec365                    | -0.004271232 | 0.030932756 | 0.890378985 |
| pcaac381.c102                  | -0.005481347 | 0.039711556 | 0.890420162 |
| asymmetricdimethylarginine.pca | -0.010981578 | 0.079600585 | 0.890475771 |
| pcaac403.c5                    | -0.004863647 | 0.035267626 | 0.890516527 |
| leucine.glutamicacid           | 0.005990698  | 0.043451325 | 0.890544423 |
| pcaac320.pcaac404              | 0.001069539  | 0.007757533 | 0.890544805 |
| pcaac321.smc261                | -0.007688522 | 0.055772335 | 0.890557047 |
| c18.h1                         | -0.00081065  | 0.005890643 | 0.89074548  |
| pcaec444.smc202                | 0.008942401  | 0.064987761 | 0.890757546 |
| asymmetricdimethylarginine.pca | -0.008580301 | 0.062372147 | 0.890785223 |

|                                |              |             |             |
|--------------------------------|--------------|-------------|-------------|
| smc160.lysopcac281             | 0.003530794  | 0.025678418 | 0.890837107 |
| pcaac424.threonine             | -0.004123101 | 0.030013946 | 0.890937796 |
| c14.asymmetricdimethylarginine | 0.002270475  | 0.016529716 | 0.89095013  |
| h1.pcaac385                    | 0.0042263    | 0.030780641 | 0.890992215 |
| pcaec321.pcaec420              | -0.004097169 | 0.029858989 | 0.89106051  |
| smc180.c4                      | 0.002056886  | 0.014996294 | 0.891106017 |
| smc261.pcaac322                | -0.009160149 | 0.066799355 | 0.891129907 |
| pcaec406.pcaac321              | -0.004270342 | 0.031152971 | 0.891171525 |
| lysopcac203.c0                 | 0.00037752   | 0.002754445 | 0.891185833 |
| c14.pcaec341                   | -0.010376607 | 0.075778334 | 0.891284238 |
| pcaec343.smc181                | -0.002169262 | 0.015844541 | 0.891303634 |
| asymmetricdimethylarginine.pca | -0.013978723 | 0.102146331 | 0.891350287 |
| pcaac361.smc260                | -0.003613375 | 0.026414292 | 0.891392695 |
| pcaac364.smc260                | 0.003605725  | 0.026367125 | 0.891428533 |
| smohc221.pcaec444              | -0.017529657 | 0.128344103 | 0.891560706 |
| pcaac422.pcaec420              | -0.003652982 | 0.026751678 | 0.891585756 |
| pcaac300.pcaec360              | -0.000895445 | 0.006561741 | 0.891654346 |
| pcaec401.pcaec384              | 0.008859856  | 0.065026891 | 0.891824355 |
| pcaec362.pcaec342              | -0.020580192 | 0.151057003 | 0.891830578 |
| smc260.pcaac381                | -0.007358121 | 0.05402663  | 0.891867578 |
| lysopcac170.pcaec341           | -0.005338039 | 0.039231055 | 0.891968316 |
| asymmetricdimethylarginine.pca | 0.005189369  | 0.038163859 | 0.892039861 |
| smohc161.c4                    | 0.002410057  | 0.017728615 | 0.892066975 |
| ornithine.pcaac421             | -0.001474922 | 0.010853871 | 0.892108485 |
| smc160.smc240                  | -0.009183291 | 0.067637506 | 0.892200682 |
| lysopcac160.pcaec384           | -0.006264179 | 0.046156209 | 0.892244271 |
| pcaac402.lysopcac180           | -0.012199336 | 0.089901093 | 0.892259761 |
| pcaac426.pcaac404              | -0.001478506 | 0.010906389 | 0.892365532 |
| smohc161.pcaec446              | -0.003770048 | 0.027814541 | 0.892382047 |
| pcaac360.pcaec321              | 0.005517474  | 0.040722002 | 0.892422386 |
| lysopcac181.pcaac344           | 0.009300351  | 0.068651128 | 0.89243702  |
| pcaac386.taurine               | -0.004058816 | 0.029965959 | 0.892456843 |
| lysopcac180.acetylnornithoine  | -0.006384567 | 0.047182855 | 0.89256112  |
| pcaec420.arginine              | 0.006895079  | 0.050961362 | 0.892573171 |
| lysopcac280.c0                 | 0.000115721  | 0.000855376 | 0.892583862 |
| pcaac365.pcaec403              | 0.002562711  | 0.018965916 | 0.892713799 |
| pcaac342.threonine             | 0.003460485  | 0.025611376 | 0.892719147 |
| glycine.lysopcac161            | -0.005620844 | 0.041607953 | 0.892738498 |
| c0.pcaec341                    | 0.005799152  | 0.042936765 | 0.892760602 |
| lysine.pcaec343                | -0.012496724 | 0.09261085  | 0.892858931 |
| glycine.serotonin              | -0.013721184 | 0.101687273 | 0.892861218 |
| pcaec421.threonine             | 0.00306855   | 0.022745857 | 0.892884277 |
| pcaec382.pcaac426              | 0.014819938  | 0.109858871 | 0.892889105 |

|                                |              |             |             |
|--------------------------------|--------------|-------------|-------------|
| pcaec361.lysopcac180           | 0.013154451  | 0.097531541 | 0.892909598 |
| acetylmethionine.pcaec361      | 0.002366699  | 0.017556166 | 0.892962124 |
| lysopcac203.pcaec364           | 0.006605442  | 0.049032559 | 0.893034591 |
| pcaec362.pcaec321              | -0.00573215  | 0.0425724   | 0.893090368 |
| c4.smc241                      | 0.009322557  | 0.069238659 | 0.893091111 |
| pcaec340.pcaec403              | 0.001745578  | 0.012973577 | 0.893166192 |
| pcaec425.pcaec343              | 0.010163163  | 0.075684986 | 0.893376328 |
| pcaec364.valine                | 0.007881727  | 0.058749349 | 0.893474097 |
| pcaec443.threonine             | 0.003496447  | 0.026071584 | 0.893512813 |
| pcaec383.pcaec426              | -0.010919452 | 0.081431643 | 0.893525451 |
| phenylalanine.pcaec343         | -0.009803201 | 0.073122635 | 0.893547755 |
| pcaec360.lysopcac204           | -0.004169578 | 0.031126386 | 0.893633652 |
| pcaec301.pcaec362              | 0.001716156  | 0.012844164 | 0.893904166 |
| c182.pcaec365                  | -0.004431706 | 0.033169006 | 0.89390715  |
| lysopcac204.lysopcac160        | 0.002225177  | 0.016657945 | 0.893930287 |
| asymmetricdimethylarginine.pca | -0.009425436 | 0.070700389 | 0.894139735 |
| lysopcac280.pcaec301           | -0.009841133 | 0.073891472 | 0.894243605 |
| pcaec385.creatinine            | 0.002492668  | 0.018728913 | 0.894315941 |
| c51.pcaec386                   | -0.001906527 | 0.014326076 | 0.894324682 |
| c18.pcaec422                   | -0.003351322 | 0.025199011 | 0.894393137 |
| pcaec321.pcaec343              | 0.006198712  | 0.046641992 | 0.894467624 |
| pcaec403.threonine             | -0.004216092 | 0.03172397  | 0.89446806  |
| pcaec300.c142                  | 0.006981413  | 0.0525481   | 0.894500961 |
| pcaec343.threonine             | 0.005077908  | 0.038222061 | 0.894504717 |
| pcaec383.pcaec364              | -0.002801257 | 0.021090819 | 0.894531599 |
| pcaec402.c16                   | 0.002158681  | 0.016261924 | 0.894590227 |
| c141.asymmetricdimethylarginin | 0.002239767  | 0.016873459 | 0.894594515 |
| pcaec420.c182                  | -0.005132122 | 0.038666422 | 0.894603151 |
| pcaec301.pcaec341              | 0.008986259  | 0.067723747 | 0.894633303 |
| smohc222.c2                    | 0.008568941  | 0.064591837 | 0.894654627 |
| pcaec423.pcaec402              | 0.006768839  | 0.051025761 | 0.894660619 |
| c8.lysopcac140                 | 0.000252856  | 0.00190922  | 0.894831242 |
| c51dc.methionine               | -0.005728019 | 0.043265592 | 0.894868481 |
| citruline.leucine              | -0.00109828  | 0.008300425 | 0.894928399 |
| asymmetricdimethylarginine.smc | 0.010152657  | 0.076810015 | 0.895036785 |
| pcaec322.pcaec424              | 0.001819713  | 0.013769431 | 0.895054807 |
| pcaec364.taurine               | -0.003755809 | 0.028422975 | 0.895067523 |
| lysopcac181.pcaec365           | 0.003235171  | 0.02449976  | 0.895139207 |
| pcaec322.threonine             | 0.004587442  | 0.034759929 | 0.895197679 |
| citruline.isoleucine           | -0.002468457 | 0.018705768 | 0.895207666 |
| pcaec384.pcaec385              | -0.00964966  | 0.073151898 | 0.895246922 |
| pcaec382.lysopcac181           | -0.010427368 | 0.079072042 | 0.895279208 |
| c5.pcaec443                    | 0.016733486  | 0.126898792 | 0.895284681 |

|                                 |              |             |             |
|---------------------------------|--------------|-------------|-------------|
| pcaec402.threonine              | -0.004532347 | 0.034407464 | 0.89539452  |
| c0.pcaec301                     | 0.010284209  | 0.07808549  | 0.895411266 |
| methioninesulfoxide.smohc141    | -0.004244108 | 0.032226359 | 0.895417328 |
| methionine.c102                 | -0.002947271 | 0.022380286 | 0.895422284 |
| pcaec322.lysopcac280            | 0.001403261  | 0.010655884 | 0.895423629 |
| pcaec343.pcaac421               | -0.003214694 | 0.024421359 | 0.895466506 |
| citruline.lysopcac281           | -0.005268309 | 0.040025039 | 0.895473749 |
| h1.pcaac426                     | 0.00689753   | 0.052405944 | 0.895480072 |
| c182.pcaac403                   | -0.000826739 | 0.006289525 | 0.895614596 |
| isoleucine.taurine              | -0.005437384 | 0.041434329 | 0.895786694 |
| smc181.pcaac422                 | -0.00780284  | 0.059465792 | 0.895797245 |
| leucine.lysopcac140             | -0.000245177 | 0.001868666 | 0.895806241 |
| smc160.pcaac343                 | 0.002923234  | 0.022284109 | 0.895825197 |
| h1.pcaac421                     | 0.003291879  | 0.025118526 | 0.895924987 |
| glutamine.isoleucine            | 0.00286921   | 0.021905938 | 0.895984354 |
| glutamicacid.c142               | 0.008927713  | 0.06822814  | 0.896085209 |
| c142.pcaac361                   | -0.003875868 | 0.029625293 | 0.896101959 |
| pcaac385.c2                     | 0.008164124  | 0.062425944 | 0.896140439 |
| alanine.arginine                | 0.0026023    | 0.019907599 | 0.896189413 |
| c3.pcaac380                     | -0.010296329 | 0.078784874 | 0.896212913 |
| pcaec406.pcaac343               | -0.00450077  | 0.034470812 | 0.896308936 |
| glycine.tryptophan              | 0.001625811  | 0.012455524 | 0.896339122 |
| pcaec386.pcaac403               | 0.003133412  | 0.024008146 | 0.896350804 |
| pcaec421.putrescine             | -0.007555466 | 0.0579025   | 0.896373325 |
| alphaaminoadipicacid.lysopcac1' | -0.000972875 | 0.007456256 | 0.896379895 |
| methionine.pcaec343             | -0.011927099 | 0.091418349 | 0.896388152 |
| pcaec445.lysopcac280            | 0.001111663  | 0.008526017 | 0.896453236 |
| c102.c51dc                      | -0.016999472 | 0.130382434 | 0.896455761 |
| histidine.serotonin             | 0.008501944  | 0.06522189  | 0.896477451 |
| pcaac401.smc261                 | -0.006076666 | 0.046617478 | 0.8964794   |
| c8.smc241                       | 0.001938838  | 0.014879288 | 0.896516661 |
| pcaac343.lysopcac140            | -0.000641719 | 0.00492621  | 0.896546853 |
| pcaec423.pcaac343               | 0.003064658  | 0.023538548 | 0.89660121  |
| leucine.pcaac383                | -0.001430166 | 0.010985115 | 0.896606095 |
| pcaac364.c4                     | -0.002979111 | 0.022905168 | 0.896707478 |
| serotonin.pcaec421              | 0.000888202  | 0.006829682 | 0.896717409 |
| creatinine.pcaec362             | 0.003219341  | 0.024765163 | 0.896761248 |
| pcaac424.smc202                 | -0.010871386 | 0.083641243 | 0.896775763 |
| c18.lysopcac160                 | 0.001545335  | 0.011906764 | 0.896925832 |
| smohc241.pcaac281               | -0.00030086  | 0.002318369 | 0.896936986 |
| pcaec401.ornithine              | 0.006542512  | 0.050433939 | 0.896974756 |
| c10.glutamicacid                | -0.00816508  | 0.063032677 | 0.897122545 |
| smohc221.c5                     | -0.000968696 | 0.007480633 | 0.897156855 |



|                              |              |             |             |
|------------------------------|--------------|-------------|-------------|
| asparticacid.smc160          | -0.006335939 | 0.048977655 | 0.897259471 |
| c181.c162                    | -0.014970994 | 0.115847425 | 0.897364976 |
| pcaac361.pcaac384            | -0.012878685 | 0.099703387 | 0.897412586 |
| pcaac405.pcaac342            | -0.015906428 | 0.123189803 | 0.897451035 |
| pcaac402.tyrosine            | -0.008434454 | 0.065326637 | 0.897458365 |
| c141oh.pcaec382              | 0.00159557   | 0.012360841 | 0.897481548 |
| lysopcac181.smc260           | -0.004919069 | 0.038164011 | 0.897631449 |
| pcaac366.phenylalanine       | 0.005289578  | 0.041044678 | 0.897646611 |
| pcaac344.lysopcac140         | -0.000377357 | 0.002930287 | 0.897722013 |
| pcaec420.phenylalanine       | -0.003897261 | 0.030288196 | 0.897805407 |
| pcaac240.lysine              | 0.011098764  | 0.086306645 | 0.897865239 |
| smc161.pcaac402              | -0.005119994 | 0.039886245 | 0.898048446 |
| pcaec405.pcaec383            | 0.019916082  | 0.155256981 | 0.898116954 |
| isoleucine.pcaac380          | -0.009403896 | 0.073377652 | 0.898212274 |
| c162.glutamine               | -0.004728101 | 0.036905729 | 0.898247471 |
| pcaec420.methioninesulfoxide | -0.008259693 | 0.064632241 | 0.89849841  |
| pcaec422.taurine             | 0.008596407  | 0.067333994 | 0.898598797 |
| smohc241.kynurenine          | -0.000871374 | 0.006825787 | 0.898605934 |
| lysopcac170.c3               | 0.003013957  | 0.023613043 | 0.898621447 |
| c182.pcaac421                | -0.001365183 | 0.010698901 | 0.898652437 |
| pcaac344.pcaac404            | -0.000692405 | 0.005426661 | 0.898658035 |
| lysopcac170.smc260           | -0.005048902 | 0.039574476 | 0.898668619 |
| lysopcac170.pcaec446         | 0.005965675  | 0.046779688 | 0.898710271 |
| pcaac420.lysopcac140         | -0.000260051 | 0.00203942  | 0.898721776 |
| pcaac385.pcaec402            | 0.003744388  | 0.029404468 | 0.898857412 |
| lysopcac160.taurine          | 0.007079731  | 0.055645082 | 0.898944807 |
| pcaec341.pcaac425            | 0.012112915  | 0.095297634 | 0.899042759 |
| pcaec321.taurine             | -0.003772958 | 0.029690031 | 0.899064773 |
| pcaac364.pcaac404            | 0.001576311  | 0.012410756 | 0.899117394 |
| asparagine.pcaac365          | -0.008550003 | 0.067328453 | 0.89913495  |
| lysopcac280.pcaec362         | -0.001938308 | 0.015269447 | 0.899173772 |
| pcaec340.c4                  | -0.001548701 | 0.012208119 | 0.899238539 |
| pcaac363.pcaec364            | -0.001918379 | 0.015140015 | 0.899356327 |
| pcaac363.lysopcac161         | -0.009141723 | 0.072185587 | 0.899409478 |
| smohc141.methionine          | -0.00231287  | 0.018268497 | 0.899439251 |
| pcaec401.pcaec341            | -0.003906278 | 0.030867875 | 0.899483443 |
| pcaec321.pcaac360            | -0.008903911 | 0.070388773 | 0.899524634 |
| glutamine.pcaec361           | -0.00085103  | 0.00673051  | 0.89956612  |
| c14.pcaac364                 | 0.005415593  | 0.042859237 | 0.899634065 |
| smohc141.c0                  | -8.19E-05    | 0.000648205 | 0.89967285  |
| c14.lysopcac161              | -0.0078985   | 0.062541908 | 0.89968648  |
| pcaac422.pcaac425            | 0.015304855  | 0.121223406 | 0.899716518 |
| pcaac341.pcaac424            | -0.000776404 | 0.006152174 | 0.899758683 |

|                                 |              |             |             |
|---------------------------------|--------------|-------------|-------------|
| pcaec383.pcaec420               | -0.004738785 | 0.037553552 | 0.899768598 |
| prolinr.asymmetricdimethylargin | 0.002034908  | 0.016140395 | 0.899857023 |
| pcaac426.pcaac322               | -0.011622458 | 0.092229149 | 0.899903068 |
| pcaac426.pcaec402               | -0.004799879 | 0.038107377 | 0.899950862 |
| smohc161.c2                     | -0.009436288 | 0.075009506 | 0.900073695 |
| c142.pcaec341                   | -0.006793107 | 0.054023807 | 0.900119835 |
| lysopcac181.pcaac425            | -0.011229939 | 0.089362649 | 0.900179725 |
| lysopcac203.pcaec383            | 0.015819816  | 0.125985609 | 0.900257628 |
| pcaec301.pcaec403               | 0.001640932  | 0.013079669 | 0.900345952 |
| pcaec421.pcaec422               | -0.017902302 | 0.142749441 | 0.90038229  |
| pcaec420.lysopcac170            | -0.00212318  | 0.016947581 | 0.900486117 |
| smc241.glycine                  | 0.004011997  | 0.032027725 | 0.900496312 |
| asparticacid.c101               | 0.003205827  | 0.025625067 | 0.900623736 |
| pcaec446.lysopcac170            | 0.002506186  | 0.020033462 | 0.900627787 |
| pcaec342.lysopcac140            | 0.0001484    | 0.001186623 | 0.90065908  |
| smohc222.asymmetricdimethyla    | 0.003345057  | 0.026748901 | 0.900664122 |
| pcaec406.lysopcac180            | -0.009782162 | 0.07831266  | 0.900776612 |
| pcaec341.pcaec445               | 0.005510382  | 0.044119705 | 0.900788839 |
| lysopcac281.pcaac424            | 0.001538141  | 0.012319617 | 0.900822947 |
| glutamine.lysopcac181           | 0.00594134   | 0.047634105 | 0.900921168 |
| pcaec406.pcaac424               | 0.001881891  | 0.015099225 | 0.900995253 |
| c4.pcaac365                     | 0.010126555  | 0.081267365 | 0.90101663  |
| pcaec361.smc261                 | -0.008593891 | 0.068989523 | 0.901048109 |
| pcaac364.pcaec401               | 0.004956887  | 0.039835187 | 0.901153348 |
| pcaac361.pcaec384               | -0.008329991 | 0.066981313 | 0.90121022  |
| h1.pcaac361                     | -0.015500378 | 0.124646982 | 0.901217095 |
| c3.pcaac426                     | 0.004421581  | 0.035569436 | 0.901253267 |
| smohc222.methionine             | 0.002596687  | 0.020927118 | 0.901431918 |
| pcaec322.smc241                 | 0.00589609   | 0.047546929 | 0.901492514 |
| pcaac322.c51dc                  | 0.013045505  | 0.105314612 | 0.901598378 |
| lysopcac140.pcaac424            | 0.000789176  | 0.006382391 | 0.901774465 |
| lysopcac203.spermidine          | 0.010410228  | 0.084224984 | 0.901812954 |
| c16.pcaac322                    | -0.008826693 | 0.0714408   | 0.90185065  |
| asparticacid.pcaec380           | -0.012204675 | 0.09878902  | 0.901858329 |
| pcaac341.pcaac404               | -0.000502572 | 0.00406889  | 0.901879647 |
| smc160.smc161                   | 0.021825359  | 0.1767545   | 0.901909267 |
| pcaec365.pcaec422               | -0.00449836  | 0.036457414 | 0.901981726 |
| pcaec382.serine                 | -0.014474372 | 0.11736514  | 0.902028357 |
| ornithine.pcaec444              | -0.010071816 | 0.081680971 | 0.902044904 |
| pcaec380.threonine              | -0.004293971 | 0.034824282 | 0.902047146 |
| pcaac240.pcaec384               | 0.005163682  | 0.041878406 | 0.902048834 |
| pcaec422.lysopcac182            | -0.006776573 | 0.05500506  | 0.902130009 |
| pcaac341.taurine                | 0.002958485  | 0.02403662  | 0.90222222  |

|                              |              |             |             |
|------------------------------|--------------|-------------|-------------|
| lysopcac160.pcaec385         | 0.004471402  | 0.036357548 | 0.902299888 |
| pcaac342.c101                | -0.002582923 | 0.021005334 | 0.902314937 |
| pcaac342.pcaec401            | -0.005276957 | 0.042946728 | 0.902388404 |
| isoleucine.glutamicacid      | 0.007367225  | 0.060007148 | 0.902467207 |
| pcaac342.tyrosine            | -0.007796753 | 0.063514502 | 0.90248063  |
| smc261.c3                    | 0.00284921   | 0.0232122   | 0.902487924 |
| pcaec420.lysopcac281         | -0.0007018   | 0.005718804 | 0.902510255 |
| arginine.pcaec405            | -0.007433608 | 0.060611792 | 0.902569576 |
| c5.lysopcac280               | -0.002854405 | 0.023283233 | 0.90260757  |
| pcaac365.pcaac341            | -0.004496139 | 0.036694136 | 0.902658696 |
| pcaec424.prolinr             | 0.002874435  | 0.023460914 | 0.902666642 |
| pcaec362.pcaec444            | -0.012967239 | 0.105855327 | 0.902682848 |
| pcaec383.c16                 | 0.002052879  | 0.016759278 | 0.902688835 |
| pcaac424.histidine           | 0.01311169   | 0.107119389 | 0.902759561 |
| pcaac363.lysopcac281         | -0.002170599 | 0.017748726 | 0.902843772 |
| pcaac425.lysopcac281         | 0.001015435  | 0.008306169 | 0.902879575 |
| c18.pcaec343                 | 0.008990855  | 0.073564364 | 0.902905833 |
| pcaec341.pcaec361            | -0.001352148 | 0.011072462 | 0.902984432 |
| pcaac386.pcaac426            | 0.008549057  | 0.070007864 | 0.902986356 |
| pcaac422.pcaec341            | -0.003566028 | 0.029224408 | 0.903060202 |
| pcaac281.histidine           | 0.007883978  | 0.064630403 | 0.903089182 |
| acetylmithoine.phenylalanine | -0.009059849 | 0.074303971 | 0.903133492 |
| pcaac343.c14                 | -0.005642654 | 0.046289799 | 0.903158071 |
| serotonin.pcaec380           | -0.00822934  | 0.067525019 | 0.903179782 |
| histidine.pcaac322           | 0.007592136  | 0.062304324 | 0.903191875 |
| smc180.c3                    | 0.0022025    | 0.018078318 | 0.903211362 |
| smc260.taurine               | 0.006303722  | 0.05174699  | 0.903221545 |
| smohc222.threonine           | -0.005703054 | 0.046825245 | 0.903240295 |
| c2.smc240                    | 0.008336115  | 0.068468729 | 0.903274863 |
| c3.tyrosine                  | -0.006614828 | 0.054337199 | 0.903285973 |
| pcaac342.pcaec341            | 0.006975205  | 0.05730181  | 0.903293213 |
| c51dc.pcaec301               | -0.013852551 | 0.113804222 | 0.903297036 |
| pcaac424.pcaac320            | -0.008491881 | 0.069808262 | 0.903357795 |
| pcaec380.pcaec365            | 0.005090279  | 0.041849729 | 0.903368461 |
| pcaac422.smohc141            | -0.006328499 | 0.052039174 | 0.903385852 |
| c2.pcaac402                  | -0.00457803  | 0.037664743 | 0.903436027 |
| pcaec446.pcaac420            | -0.021748246 | 0.179235328 | 0.903600272 |
| lysopcac161.pcaac403         | 0.001341985  | 0.011061469 | 0.903614832 |
| pcaec384.lysopcac181         | -0.007689313 | 0.063433791 | 0.903696029 |
| pcaac341.pcaec364            | -0.002026309 | 0.016717969 | 0.903705895 |
| pcaac365.smc261              | 0.005435615  | 0.044868342 | 0.903752994 |
| pcaec403.pcaac425            | 0.016624627  | 0.137303918 | 0.903805831 |
| pcaac422.pcaec321            | -0.002867598 | 0.023684216 | 0.90380797  |

|                          |              |             |             |
|--------------------------|--------------|-------------|-------------|
| c51.c142                 | -0.008514503 | 0.070340243 | 0.903830853 |
| pcaac420.pcaac320        | -0.007784816 | 0.064384753 | 0.903938786 |
| pcaac425.pcaac322        | 0.009161216  | 0.075789083 | 0.903964946 |
| pcaac443.pcaac380        | 0.008493434  | 0.070303374 | 0.90401759  |
| c5.pcaac421              | 0.003872877  | 0.032066019 | 0.904043651 |
| pcaac423.pcaac344        | 0.008012413  | 0.066400069 | 0.90413021  |
| h1.pcaac423              | 0.008814475  | 0.073049215 | 0.90413326  |
| lysopcac182.lysopcac160  | 0.00155806   | 0.012928727 | 0.904254578 |
| pcaac383.pcaac343        | -0.008727586 | 0.07243911  | 0.904278101 |
| h1.smc240                | -0.00285958  | 0.023740642 | 0.904302504 |
| c141.pcaac384            | 0.008592054  | 0.071439008 | 0.904444536 |
| smc240.pcaac383          | -0.00912171  | 0.075869303 | 0.904477686 |
| c141.spermidine          | 0.00858022   | 0.071391837 | 0.904512762 |
| lysopcac160.histidine    | -0.00796031  | 0.066261934 | 0.904553016 |
| smohc141.pcaac422        | 0.002893664  | 0.024122041 | 0.904691089 |
| pcaac406.threonine       | 0.00415288   | 0.034652595 | 0.904782874 |
| pcaac362.pcaac343        | 0.00981673   | 0.081920501 | 0.904791467 |
| pcaac380.pcaac445        | -0.007266126 | 0.060636373 | 0.904792454 |
| pcaac401.smohc161        | -0.001678282 | 0.014008749 | 0.904815191 |
| glutamicacid.smc241      | -0.008932551 | 0.074578706 | 0.904838053 |
| smc261.pcaac341          | -0.011923775 | 0.09955618  | 0.904841348 |
| pcaac444.pcaac301        | -0.006786146 | 0.056664293 | 0.904848291 |
| lysopcac160.methionine   | -0.004027202 | 0.033640183 | 0.90488506  |
| glutamine.c12            | -0.012518688 | 0.104604257 | 0.904914609 |
| alphaaminoadipicacid.c4  | 0.002703436  | 0.022594545 | 0.904935742 |
| pcaac421.c141oh          | 0.015109992  | 0.126308546 | 0.90495338  |
| pcaac401.c141            | -0.004908747 | 0.041089186 | 0.905081448 |
| lysopcac180.pcaac386     | 0.00126679   | 0.0106173   | 0.905201596 |
| pcaac365.lysopcac204     | 0.003844328  | 0.03224325  | 0.905268658 |
| pcaac384.c5              | -0.000715269 | 0.005999158 | 0.90526922  |
| ornithine.pcaac365       | -0.003135188 | 0.026308409 | 0.905314804 |
| pcaac401.pcaac420        | -0.005666235 | 0.0475526   | 0.905325365 |
| lysopcac161.pcaac341     | -0.004210598 | 0.035345015 | 0.905348067 |
| lysopcac182.pcaac401     | -0.006860643 | 0.057609415 | 0.905379354 |
| alanine.acetylornithoine | 0.004919781  | 0.041330268 | 0.905421371 |
| pcaac383.c51             | 0.015342522  | 0.12891712  | 0.905441175 |
| c3.c182                  | -0.006142401 | 0.051622383 | 0.905459821 |
| c14.pcaac365             | -0.004409034 | 0.037056817 | 0.905465194 |
| pcaac301.pcaac342        | -0.013290691 | 0.111726195 | 0.905483125 |
| pcaac425.smohc161        | 0.002097005  | 0.017652916 | 0.905615043 |
| c101.pcaac363            | 0.001709028  | 0.014388874 | 0.905628174 |
| pcaac321.pcaac343        | -0.012892097 | 0.10858127  | 0.905661411 |
| pcaac363.pcaac404        | -0.000497816 | 0.004193259 | 0.905672452 |

|                        |              |             |             |
|------------------------|--------------|-------------|-------------|
| pcaec365.c2            | 0.006317444  | 0.053251963 | 0.905739836 |
| c0.pcaac404            | -0.000689956 | 0.005818066 | 0.905775081 |
| c51dc.pcaec403         | 0.007696367  | 0.064979328 | 0.905889892 |
| pcaec364.pcaec384      | -0.016724446 | 0.141238667 | 0.905914139 |
| pcaec405.c8            | -0.005659456 | 0.047810187 | 0.905945162 |
| pcaec321.pcaec380      | 0.00648879   | 0.054859472 | 0.90601888  |
| pcaec321.pcaec341      | -0.00927154  | 0.078393213 | 0.906027211 |
| pcaac341.ornithine     | -0.002131352 | 0.018033389 | 0.906090829 |
| pcaec422.c162          | -0.008361324 | 0.070785685 | 0.90614426  |
| pcaac342.pcaec340      | 0.008362388  | 0.070798632 | 0.90614945  |
| pcaac323.smc260        | 0.003383333  | 0.028688707 | 0.90629381  |
| c0.arginine            | -0.004944479 | 0.041947157 | 0.906340139 |
| c8.lysopcac281         | -0.001452095 | 0.012322917 | 0.906369418 |
| c181.leucine           | 0.001594275  | 0.013532891 | 0.90639279  |
| pcaac385.phenylalanine | -0.005238676 | 0.044471491 | 0.906399823 |
| c14.smc161             | 0.006244184  | 0.053019182 | 0.906420672 |
| serine.smc160          | -0.007627001 | 0.064786109 | 0.906457295 |
| c5.pcaac424            | 0.001408937  | 0.011968021 | 0.906457888 |
| c182.smohc222          | -0.001506993 | 0.012807728 | 0.906507158 |
| pcaec301.ornithine     | -0.002736011 | 0.023265216 | 0.906556121 |
| pcaec446.pcaac240      | -0.002254992 | 0.019177501 | 0.906568489 |
| pcaac385.pcaac402      | -0.004212753 | 0.035835479 | 0.906589932 |
| isoleucine.pcaac386    | 0.003090381  | 0.026305884 | 0.906652765 |
| pcaac422.pcaec401      | 0.001977126  | 0.016829791 | 0.906653548 |
| pcaec301.pcaec402      | -0.004679942 | 0.03984335  | 0.906668725 |
| prolinr.pcaac386       | 0.003228106  | 0.027488257 | 0.906686688 |
| putrescine.pcaac361    | -0.005862193 | 0.049928243 | 0.906705252 |
| pcaec405.c0            | 0.000267836  | 0.002281885 | 0.906735035 |
| h1.pcaec445            | -0.010043517 | 0.085704252 | 0.906882639 |
| pcaec406.smc261        | 0.005437128  | 0.046408791 | 0.906906992 |
| pcaec401.prolinr       | -0.003573295 | 0.030521325 | 0.90697179  |
| pcaec444.pcaac365      | 0.007350039  | 0.062788301 | 0.906983432 |
| pcaec365.pcaac322      | -0.007245307 | 0.06196448  | 0.907089316 |
| lysopcac160.pcaec386   | 0.000970013  | 0.008297172 | 0.907103516 |
| pcaac426.pcaec401      | 0.004098797  | 0.035062738 | 0.907111328 |
| pcaac341.pcaac365      | -0.004152009 | 0.035558895 | 0.907217845 |
| c141.smc260            | 0.00486087   | 0.041692199 | 0.90735615  |
| c8.pcaec321            | 0.003059377  | 0.026252245 | 0.907397044 |
| pcaec403.lysine        | -0.011924326 | 0.102351879 | 0.907424326 |
| isoleucine.pcaac343    | -0.003975805 | 0.034134098 | 0.907445833 |
| lysopcac170.pcaac321   | 0.003610562  | 0.031005062 | 0.907465876 |
| lysopcac203.pcaec343   | -0.009532851 | 0.08195727  | 0.907573313 |
| pcaec340.creatinine    | -0.00077639  | 0.006675713 | 0.907584555 |

|                          |              |             |             |
|--------------------------|--------------|-------------|-------------|
| pcaec404.c14             | 0.00995492   | 0.085619964 | 0.907609873 |
| c4.pcaac381              | 0.00505805   | 0.043520933 | 0.907647525 |
| c3.taurine               | 0.007046133  | 0.060728323 | 0.90780094  |
| lysopcac160.c14          | -0.004722361 | 0.040715145 | 0.907833985 |
| smohc141.serotonin       | -0.011420135 | 0.098633744 | 0.907993869 |
| c182.pcaac380            | 0.006267239  | 0.054156753 | 0.908040691 |
| ornithine.pcaec443       | 0.010542313  | 0.091128842 | 0.908070955 |
| pcaec386.pcaac321        | -0.002927602 | 0.025321399 | 0.90812484  |
| alanine.lysopcac170      | -0.002274079 | 0.019669029 | 0.908125195 |
| c12.pcaec422             | 0.004667321  | 0.040373098 | 0.908135086 |
| pcaac406.pcaac424        | -0.002931854 | 0.025363217 | 0.908143003 |
| c18.pcaec404             | 0.006571577  | 0.056851581 | 0.90814531  |
| pcaec364.lysopcac140     | 0.000151814  | 0.001314231 | 0.908205828 |
| smohc161.pcaec425        | 0.00318187   | 0.027557832 | 0.908248363 |
| c102.pcaec383            | -0.008406525 | 0.072909218 | 0.908375158 |
| pcaec443.pcaec422        | 0.013571973  | 0.117767297 | 0.908420476 |
| pcaec405.pcaac425        | -0.016213694 | 0.140937129 | 0.908580248 |
| pcaec341.pcaac321        | 0.004364511  | 0.037977066 | 0.908672914 |
| pcaec340.pcaec321        | -0.008863529 | 0.077150139 | 0.908703098 |
| pcaac363.pcaac341        | 0.001250411  | 0.01089406  | 0.908788239 |
| pcaec384.pcaec445        | 0.004441622  | 0.038704334 | 0.908805162 |
| smc202.pcaac421          | 0.00411474   | 0.035863275 | 0.908823871 |
| pcaac300.threonine       | 0.003602643  | 0.031407388 | 0.908845421 |
| methionine.pcaac424      | -0.001140709 | 0.009947223 | 0.908869694 |
| asparticacid.pcaec383    | 0.013610628  | 0.118689333 | 0.908871104 |
| pcaac403.pcaec403        | -0.012757978 | 0.111340455 | 0.908941609 |
| pcaac300.histidine       | 0.007333898  | 0.064135445 | 0.909127647 |
| citruline.taurine        | 0.004256434  | 0.037264104 | 0.909227896 |
| serotonin.pcaec322       | -0.007109615 | 0.062290323 | 0.909296485 |
| h1.c102                  | 0.001213358  | 0.010636113 | 0.909342108 |
| pcaec363.lysopcac203     | 0.00356957   | 0.031301493 | 0.90937436  |
| pcaac405.glycine         | -0.004963366 | 0.043543269 | 0.909414992 |
| c182.pcaac344            | -0.003950276 | 0.034671426 | 0.90945642  |
| smc202.pcaac360          | 0.005946693  | 0.052201983 | 0.909470366 |
| lysopcac203.glutamicacid | -0.005981162 | 0.052567752 | 0.909578721 |
| pcaac406.pcaac363        | -0.001737583 | 0.015277368 | 0.909613797 |
| pcaec300.lysopcac170     | 0.002161988  | 0.019020651 | 0.909669532 |
| c18.pcaac343             | 0.002221579  | 0.019560099 | 0.909739311 |
| pcaac341.lysopcac281     | 0.00213102   | 0.018781498 | 0.909828979 |
| ornithine.c8             | -0.005603977 | 0.049414173 | 0.909872882 |
| pcaac422.pcaec446        | 0.008547515  | 0.075402012 | 0.909911696 |
| pcaac386.pcaec421        | -0.000361574 | 0.003190048 | 0.909923503 |
| pcaac343.pcaec380        | -0.009612869 | 0.084821634 | 0.909934528 |

|                              |              |             |             |
|------------------------------|--------------|-------------|-------------|
| pcaec425.pcaac421            | 0.001991847  | 0.017578041 | 0.909947105 |
| serotonin.pcaac405           | -0.00955845  | 0.084390573 | 0.909986727 |
| c181.smohc222                | 0.001351408  | 0.011944873 | 0.910087499 |
| c3.pcaac424                  | -0.000826824 | 0.007318248 | 0.910210854 |
| pcaec424.histidine           | -0.009443697 | 0.083651381 | 0.910280248 |
| pcaec300.pcaec446            | -0.007093895 | 0.062875911 | 0.91033545  |
| pcaec300.pcaac421            | 0.001421922  | 0.012616678 | 0.910431992 |
| glutamine.pcaac344           | -0.007198414 | 0.063877698 | 0.910440836 |
| ornithine.smc181             | -0.003238938 | 0.02874851  | 0.910461419 |
| pcaec445.pcaec380            | -0.006538645 | 0.058135492 | 0.910613387 |
| pcaac405.smc260              | -0.00295534  | 0.026297548 | 0.910685951 |
| pcaac422.smc261              | 0.004531792  | 0.040344581 | 0.910728431 |
| pcaec343.pcaec446            | -0.003854031 | 0.034346251 | 0.910820268 |
| pcaec381.threonine           | -0.004052541 | 0.036118374 | 0.910827761 |
| pcaec424.c162                | 0.009836491  | 0.087676916 | 0.91083681  |
| pcaac405.lysopcac281         | -0.00161024  | 0.014359503 | 0.910878454 |
| smc160.pcaec342              | -0.017330533 | 0.154646996 | 0.910935808 |
| lysopcac280.pcaac364         | -0.008040983 | 0.071835527 | 0.911037971 |
| pcaec385.pcaac386            | 0.003110771  | 0.027805772 | 0.911086258 |
| pcaac361.c142                | -0.005965611 | 0.053330377 | 0.911097025 |
| prolinr.pcaac321             | 0.003475648  | 0.031074728 | 0.911107579 |
| pcaec406.pcaac402            | -0.003792368 | 0.033934983 | 0.911182078 |
| pcaac383.ornithine           | 0.003209557  | 0.028775093 | 0.911351864 |
| pcaac421.c5                  | -0.001811994 | 0.016246332 | 0.911357322 |
| pcaec322.pcaec343            | 0.011827261  | 0.10609745  | 0.911402484 |
| putrescine.pcaac323          | -0.010149829 | 0.09116846  | 0.91151722  |
| pcaec381.pcaac364            | -0.007195193 | 0.064655233 | 0.911552791 |
| lysopcac181.methionine       | -0.003888428 | 0.034987916 | 0.911670902 |
| pcaec423.c8                  | -0.005342691 | 0.048087885 | 0.911697558 |
| smohc241.c5                  | 0.000878473  | 0.007914648 | 0.911784136 |
| pcaec404.pcaec422            | 0.008394189  | 0.075667001 | 0.911829509 |
| pcaac240.valine              | 0.00434533   | 0.039170529 | 0.911831313 |
| asparagine.c141oh            | 0.011865241  | 0.107092484 | 0.911941577 |
| arginine.lysopcac180         | 0.005133406  | 0.046390875 | 0.912051465 |
| smc161.lysopcac203           | 0.0017227    | 0.015572488 | 0.912075921 |
| pcaec421.pcaac424            | -0.019465037 | 0.176052368 | 0.912123978 |
| pcaac322.methioninesulfoxide | 0.003536239  | 0.032011441 | 0.912199916 |
| pcaac401.pcaac343            | 0.001746369  | 0.0158092   | 0.91220198  |
| lysopcac161.asparagine       | -0.001276397 | 0.011555304 | 0.912206332 |
| pcaec404.c51                 | 0.012574612  | 0.113874911 | 0.912234097 |
| pcaec420.c14                 | -0.004162529 | 0.037695729 | 0.912234389 |
| pcaac365.pcaac380            | 0.006705671  | 0.060835136 | 0.912390707 |
| c0.pcaec343                  | 0.007838167  | 0.07111008  | 0.912391588 |

|                               |              |             |             |
|-------------------------------|--------------|-------------|-------------|
| c8.lysopcac280                | -0.001355972 | 0.012305099 | 0.912415267 |
| pcaac300.pcaac343             | 0.005178737  | 0.047027382 | 0.912473982 |
| lysine.prolinr                | 0.004468611  | 0.040597444 | 0.91251396  |
| pcaec364.pcaec342             | 0.01661809   | 0.151048889 | 0.912556132 |
| histidine.pcaec364            | -0.002536181 | 0.023072119 | 0.912630451 |
| pcaac426.c3                   | 0.004963292  | 0.045209444 | 0.912741014 |
| smc240.pcaac343               | 0.002687357  | 0.024482038 | 0.912753577 |
| pcaac424.pcaec420             | 0.004056496  | 0.036955571 | 0.912754923 |
| pcaac320.lysopcac140          | -0.000105259 | 0.000960202 | 0.912869686 |
| pcaac401.threonine            | -0.002836175 | 0.025872624 | 0.912870605 |
| pcaec300.pcaec364             | 0.004372462  | 0.039918762 | 0.91293922  |
| smc241.arginine               | 0.005343414  | 0.048825019 | 0.913013593 |
| histidine.phenylalanine       | 0.003754475  | 0.034343597 | 0.913107877 |
| pcaac320.pcaac321             | 0.003501154  | 0.0320439   | 0.913155209 |
| pcaec385.pcaac425             | 0.01045225   | 0.095681034 | 0.913171535 |
| c5.pcaec446                   | -0.009913412 | 0.090760065 | 0.913182603 |
| pcaec404.c162                 | 0.010990275  | 0.100728078 | 0.913276194 |
| pcaac380.smc260               | 0.005603626  | 0.051358581 | 0.913276576 |
| c18.methionine                | -0.006956854 | 0.063803707 | 0.913334063 |
| h1.pcaec365                   | 0.004783444  | 0.043880809 | 0.913354119 |
| c3.asymmetricdimethylarginine | 0.001785193  | 0.016383293 | 0.91339027  |
| pcaac323.pcaec342             | 0.010316631  | 0.094927851 | 0.913616391 |
| pcaec402.pcaac424             | -0.001433649 | 0.013193077 | 0.913625775 |
| pcaac281.taurine              | 0.004527283  | 0.041689424 | 0.913682227 |
| smohc141.pcaac344             | 0.009554481  | 0.087989185 | 0.913688955 |
| pcaac422.pcaac343             | 0.001746808  | 0.016094182 | 0.913728825 |
| lysopcac140.pcaac323          | 0.011293046  | 0.104254314 | 0.91389868  |
| c141oh.pcaac426               | 0.006593019  | 0.060907289 | 0.913958299 |
| pcaec425.smohc161             | -0.001515265 | 0.014000339 | 0.913971138 |
| smc180.pcaec301               | -0.007722079 | 0.0714421   | 0.914083526 |
| pcaec365.pcaac404             | -0.001388264 | 0.012851637 | 0.914135993 |
| pcaac425.c5                   | 0.002110174  | 0.019604141 | 0.914439378 |
| pcaac360.pcaac424             | 0.001285603  | 0.011949949 | 0.914484441 |
| kynurenine.pcaec343           | -0.005104777 | 0.047468929 | 0.91451845  |
| smc241.smc261                 | -0.011986717 | 0.11151586  | 0.914558388 |
| acetylmithoine.smohc222       | -0.000405167 | 0.003769446 | 0.91455979  |
| pcaac422.transhydroxyproline  | -0.004284058 | 0.039876599 | 0.91460274  |
| phenylalanine.acetylmithoine  | 0.012000677  | 0.111739572 | 0.91462986  |
| pcaec444.pcaec420             | 0.003839312  | 0.035753201 | 0.914641662 |
| arginine.pcaec384             | -0.001455814 | 0.013558682 | 0.914651489 |
| pcaec365.smohc241             | 0.009390979  | 0.08748358  | 0.914671837 |
| histidine.pcaec384            | 0.002309988  | 0.021527439 | 0.914704513 |
| h1.pcaec384                   | -0.00323302  | 0.030140219 | 0.914734906 |



|                              |              |             |             |
|------------------------------|--------------|-------------|-------------|
| pcaac401.c14                 | -0.00625026  | 0.058279868 | 0.914751033 |
| pcaac405.smc181              | 0.004184217  | 0.039024923 | 0.914772028 |
| pcaec425.lysopcac170         | -0.000917942 | 0.008570815 | 0.91486563  |
| pcaec422.kynurenine          | -0.000793575 | 0.007422674 | 0.915014967 |
| pcaac364.acetylorithoine     | 0.002756232  | 0.025787637 | 0.915039027 |
| pcaec300.lysopcac140         | 7.54E-05     | 0.000705355 | 0.915069989 |
| pcaac421.pcaec301            | 0.009667893  | 0.090496917 | 0.915079188 |
| pcaac386.pcaac343            | -0.002624458 | 0.024573919 | 0.915105052 |
| glycine.smohc221             | -0.007539922 | 0.070611493 | 0.915119414 |
| pcaac363.pcaac322            | -0.008896138 | 0.08340987  | 0.915218154 |
| lysopcac140.pcaac421         | 0.003849776  | 0.036120399 | 0.915276689 |
| methioninesulfoxide.smc260   | 0.006310731  | 0.059259948 | 0.915347503 |
| lysopcac204.lysopcac281      | -0.002299432 | 0.021596391 | 0.915362849 |
| pcaec421.smohc161            | -0.001893248 | 0.017787244 | 0.915390147 |
| lysopcac170.serine           | -0.007898365 | 0.074253251 | 0.915443899 |
| pcaec386.pcaac402            | 0.005556809  | 0.052242995 | 0.915448606 |
| ornithine.pcaec386           | -0.000895352 | 0.008418955 | 0.915460602 |
| pcaac321.pcaac404            | 0.00044248   | 0.004164724 | 0.915543692 |
| pcaac380.pcaec322            | -0.014581149 | 0.137249737 | 0.915548861 |
| c0.isoleucine                | -0.001576128 | 0.01483739  | 0.915557825 |
| pcaec322.c141                | 0.003874505  | 0.036488498 | 0.915591469 |
| smc160.pcaec322              | -0.01166814  | 0.109919534 | 0.915617307 |
| pcaec403.transhydroxyproline | -0.009620156 | 0.09064386  | 0.915633372 |
| pcaec364.pcaec422            | -0.004880545 | 0.045998974 | 0.915657276 |
| c4.smohc241                  | 0.003793517  | 0.035763662 | 0.915680521 |
| smohc221.pcaec322            | 0.012739091  | 0.120118829 | 0.915694581 |
| histidine.pcaec403           | -0.002716461 | 0.02565399  | 0.915825751 |
| c3.pcaac364                  | 0.00291706   | 0.027550468 | 0.915831976 |
| methionine.lysopcac161       | -0.006481977 | 0.06123203  | 0.915848872 |
| serotonin.pcaac361           | 0.006005789  | 0.056734882 | 0.915850592 |
| lysopcac161.pcaec383         | -0.015402201 | 0.145507033 | 0.915854664 |
| c51.pcaac385                 | 0.006276892  | 0.059332609 | 0.915902444 |
| pcaec321.c162                | -0.007994574 | 0.07558528  | 0.9159204   |
| smc160.pcaec382              | -0.001372588 | 0.012979125 | 0.915932589 |
| creatinine.pcaec420          | 0.007339437  | 0.069411979 | 0.915945425 |
| pcaec401.pcaac424            | -0.0010862   | 0.010278974 | 0.915997176 |
| pcaac344.smohc141            | 0.006352718  | 0.060145191 | 0.916035939 |
| pcaec364.c162                | -0.010530343 | 0.099727534 | 0.916061209 |
| pcaac384.c4                  | -0.001898944 | 0.017986361 | 0.916072504 |
| citruline.phenylalanine      | -0.004463705 | 0.042343797 | 0.916200078 |
| prolinr.c3                   | -0.00675544  | 0.064103348 | 0.916225583 |
| pcaec404.pcaac426            | 0.009328744  | 0.088531629 | 0.916234855 |
| alanine.isoleucine           | 0.002525895  | 0.023977521 | 0.916256697 |

|                                 |              |             |             |
|---------------------------------|--------------|-------------|-------------|
| pcaec380.smc161                 | 0.010137893  | 0.096260348 | 0.916277972 |
| c162.pcaac364                   | 0.0043862    | 0.041759336 | 0.916501508 |
| lysopcac180.pcaac322            | 0.010926909  | 0.104061462 | 0.916525913 |
| pcaac362.lysopcac140            | 0.000226866  | 0.002160836 | 0.916537447 |
| methionine.lysopcac140          | -0.000133605 | 0.001272633 | 0.916542753 |
| pcaac381.pcaac402               | -0.003467124 | 0.033032002 | 0.916559012 |
| glutamine.pcaac364              | 0.005709969  | 0.054413013 | 0.916578837 |
| pcaac322.c51                    | 0.00861424   | 0.082101983 | 0.916591777 |
| c102.pcaec321                   | 0.009481064  | 0.090395722 | 0.916621263 |
| pcaac402.pcaac364               | -0.006692583 | 0.063905298 | 0.916745948 |
| smohc241.lysine                 | 0.005294545  | 0.050567629 | 0.916765199 |
| c5.pcaac385                     | 0.01508912   | 0.144139466 | 0.91677953  |
| lysopcac180.pcaac424            | 0.000799242  | 0.007635034 | 0.916782158 |
| asymmetricdimethylarginine.kyn  | -0.00060574  | 0.005787749 | 0.916799412 |
| pcaec364.pcaac386               | -0.003625557 | 0.034679263 | 0.916889445 |
| alphaaminoadipicacid.phenylalar | -0.007863167 | 0.075222351 | 0.916899806 |
| pcaec423.c2                     | 0.006386753  | 0.061115523 | 0.916923053 |
| lysopcac181.c162                | 0.011309868  | 0.108225455 | 0.916923151 |
| lysopcac280.pcaac404            | -0.000515515 | 0.004933491 | 0.91693101  |
| smc160.pcaec360                 | 0.000980115  | 0.00938436  | 0.916971841 |
| lysopcac281.pcaec422            | -0.00229866  | 0.02203357  | 0.91706375  |
| smc180.pcaec383                 | -0.006554969 | 0.062834136 | 0.917066557 |
| pcaec420.pcaec384               | -0.003610863 | 0.034618774 | 0.917080969 |
| smohc222.pcaac321               | 0.002905016  | 0.027874822 | 0.917149975 |
| pcaec403.lysopcac140            | -0.000283957 | 0.002724876 | 0.9171557   |
| pcaac403.phenylalanine          | 0.008509973  | 0.081736623 | 0.917230695 |
| pcaec405.pcaec422               | 0.006082293  | 0.058445269 | 0.917267429 |
| asparagine.pcaac281             | -0.000236498 | 0.002274133 | 0.917325628 |
| c12.pcaac360                    | 0.003767085  | 0.03622531  | 0.917329039 |
| glutamicacid.phenylalanine      | 0.007988746  | 0.076857956 | 0.91736763  |
| pcaec382.pcaec445               | -0.011100087 | 0.106970538 | 0.917505445 |
| smc181.lysopcac182              | -0.00276683  | 0.02667738  | 0.917547637 |
| pcaac403.c51dc                  | 0.018605807  | 0.179414413 | 0.917556727 |
| pcaec300.pcaac424               | 0.002039615  | 0.019673075 | 0.91757851  |
| pcaac321.pcaec321               | -0.003592506 | 0.034666724 | 0.917614671 |
| pcaec360.lysopcac280            | -0.002426624 | 0.023452871 | 0.917742759 |
| pcaac365.pcaec421               | 0.000253918  | 0.002454191 | 0.917746873 |
| methionine.acetylmethionine     | 0.003647069  | 0.03526823  | 0.917789217 |
| pcaec420.pcaac384               | 0.005823595  | 0.056322073 | 0.917798237 |
| pcaac363.pcaac361               | -0.014237305 | 0.137760234 | 0.917837566 |
| smc180.c2                       | -0.007001667 | 0.067763359 | 0.917855917 |
| pcaac381.c142                   | -0.004149633 | 0.040187393 | 0.917909927 |
| pcaac342.lysopcac140            | -0.000108816 | 0.001053939 | 0.917917627 |

|                        |              |             |             |
|------------------------|--------------|-------------|-------------|
| smc261.threonine       | -0.003972205 | 0.038474019 | 0.917920443 |
| phenylalanine.arginine | -0.005739703 | 0.055611944 | 0.917947313 |
| c51dc.pcaac385         | 0.002300448  | 0.02232056  | 0.91806283  |
| c181.pcaac402          | -0.002334483 | 0.022693937 | 0.918218038 |
| pcaec404.spermidine    | -0.006963718 | 0.067737896 | 0.918268961 |
| pcaec443.pcaac425      | -0.014923839 | 0.145185073 | 0.9182785   |
| asparticacid.c162      | 0.010598668  | 0.103125101 | 0.918291941 |
| phenylalanine.c3       | 0.003578298  | 0.034847023 | 0.918362405 |
| pcaac300.pcaac344      | -0.011527347 | 0.112458493 | 0.918507216 |
| c101.pcaac364          | 0.004404184  | 0.043009443 | 0.918588608 |
| pcaac403.pcaec420      | -0.006892058 | 0.06733812  | 0.918628506 |
| pcaac321.pcaac344      | -0.009502626 | 0.092861708 | 0.918643623 |
| lysopcac170.pcaec342   | 0.009516023  | 0.093016551 | 0.918664476 |
| lysopcac281.c16        | -0.001964891 | 0.019219718 | 0.918721137 |
| pcaec446.lysopcac161   | 0.007238094  | 0.070806736 | 0.918728945 |
| c2.pcaac424            | 0.004834834  | 0.047304552 | 0.918742191 |
| pcaec382.pcaac320      | -0.007863739 | 0.076960112 | 0.918763675 |
| asparticacid.smohc241  | 0.007421373  | 0.072663986 | 0.918800638 |
| pcaac383.glutamicacid  | 0.003856524  | 0.037770399 | 0.918823108 |
| lysopcac180.pcaec401   | -0.004862422 | 0.047684054 | 0.91892827  |
| pcaac364.smc181        | -0.002970261 | 0.029143853 | 0.918971377 |
| pcaec362.pcaac320      | 0.011333553  | 0.111249747 | 0.919004957 |
| smohc241.pcaac420      | -0.006975674 | 0.068501648 | 0.919038749 |
| pcaec405.pcaac445      | -0.007418759 | 0.072961555 | 0.919159036 |
| pcaac381.asparagine    | 0.001419302  | 0.013961295 | 0.919175394 |
| c16.lysine             | 0.007506983  | 0.073869305 | 0.919202764 |
| smohc241.c14           | -0.003467138 | 0.034146161 | 0.919271726 |
| pcaac364.pcaac322      | -0.006309536 | 0.062168654 | 0.919309384 |
| smc160.pcaec340        | 0.009555283  | 0.094156214 | 0.91931519  |
| pcaac406.pcaac386      | -0.01208822  | 0.119143941 | 0.919334479 |
| pcaac360.lysopcac140   | -0.000131298 | 0.001295091 | 0.919395937 |
| pcaec342.taurine       | -0.005267814 | 0.051976335 | 0.919420614 |
| pcaec321.pcaac300      | 0.008124807  | 0.08020358  | 0.919458602 |
| pcaec341.c14           | -0.005007061 | 0.04948307  | 0.919549678 |
| smc202.pcaec401        | 0.002824499  | 0.027914428 | 0.919552166 |
| glycine.pcaec382       | 0.001077537  | 0.010678653 | 0.919772871 |
| smc180.c181            | -0.001345284 | 0.013333752 | 0.919782827 |
| c162.pcaac344          | -0.004462368 | 0.044280155 | 0.919875773 |
| lysopcac180.pcaec402   | -0.00215962  | 0.021446084 | 0.919935869 |
| c51.lysopcac281        | -0.0018657   | 0.018544254 | 0.920008746 |
| lysopcac181.pcaec446   | -0.003698384 | 0.036760505 | 0.920009085 |
| c51.pcaac421           | 0.001673873  | 0.0166439   | 0.920039018 |
| pcaec446.creatinine    | -0.002888723 | 0.028724484 | 0.920041553 |

|                                |              |             |             |
|--------------------------------|--------------|-------------|-------------|
| c51.pcaac404                   | -0.00029782  | 0.002961509 | 0.920043938 |
| pcaac363.glycine               | -0.00706674  | 0.070279359 | 0.920052988 |
| pcaec365.c4                    | 0.00384711   | 0.038279108 | 0.920093081 |
| pcaec385.pcaac365              | 0.003714175  | 0.0369853   | 0.920155317 |
| pcaac426.pcaac381              | -0.005338384 | 0.053190415 | 0.920202351 |
| pcaac386.pcaac422              | 0.004624987  | 0.0460855   | 0.920207883 |
| smc241.lysopcac160             | -0.004712792 | 0.046987663 | 0.920253972 |
| pcaac406.smc261                | -0.004660185 | 0.046469936 | 0.920265568 |
| pcaec446.smc260                | -0.004974485 | 0.049611927 | 0.920278195 |
| alphaaminoadipicacid.pcaac424  | 0.000807391  | 0.008053607 | 0.920290796 |
| c18.c12                        | -0.005384181 | 0.053719754 | 0.920310472 |
| pcaac364.c162                  | 0.00725313   | 0.072383085 | 0.920328253 |
| pcaac240.pcaec420              | -0.003280531 | 0.032740711 | 0.920334171 |
| pcaac281.pcaac363              | -0.001280252 | 0.012782151 | 0.920364239 |
| pcaac343.pcaec420              | -0.003749116 | 0.037434205 | 0.920369942 |
| pcaec386.phenylalanine         | -0.002931311 | 0.029269643 | 0.920372827 |
| smohc222.c3                    | 0.001992994  | 0.019904545 | 0.920389429 |
| c12.smc261                     | -0.00426983  | 0.042658419 | 0.920416438 |
| methioninesulfoxide.c16        | 0.002577211  | 0.025763909 | 0.920465283 |
| c141.smc161                    | -0.005442877 | 0.054411545 | 0.920465428 |
| asymmetricdimethylarginine.c14 | -0.002636297 | 0.026356649 | 0.920471513 |
| serotonin.pcaec385             | 0.005608163  | 0.056084864 | 0.920495083 |
| smohc241.c101                  | 0.002497077  | 0.02498774  | 0.920544317 |
| c51dc.pcaec365                 | -0.002700112 | 0.027062654 | 0.9206707   |
| pcaac362.c0                    | 0.000143687  | 0.001440384 | 0.920683873 |
| pcaec321.pcaac404              | -0.000659262 | 0.006613782 | 0.920744054 |
| pcaac343.smohc141              | 0.005924485  | 0.05948878  | 0.920815455 |
| pcaec321.smc241                | 0.001126276  | 0.011317633 | 0.920874746 |
| c162.taurine                   | -0.006451798 | 0.064852086 | 0.920898767 |
| lysopcac161.isoleucine         | 0.004900819  | 0.049264606 | 0.920902971 |
| pcaec381.tyrosine              | -0.00493975  | 0.049677308 | 0.920936863 |
| pcaec363.smc261                | 0.005833988  | 0.0586869   | 0.920959094 |
| pcaac322.c141oh                | -0.008691346 | 0.0875191   | 0.921038895 |
| pcaac401.pcaec422              | -0.004188919 | 0.042186334 | 0.92104869  |
| c10.methionine                 | 0.004240091  | 0.042710009 | 0.921064028 |
| pcaac342.arginine              | -0.004907594 | 0.049440256 | 0.921074459 |
| creatinine.c51                 | -0.01416725  | 0.142846628 | 0.921141874 |
| pcaac240.pcaec443              | -0.013622261 | 0.137392988 | 0.921165568 |
| pcaac404.threonine             | -0.002252328 | 0.022742979 | 0.921256054 |
| pcaac281.pcaac344              | -0.008593624 | 0.086811407 | 0.921289421 |
| c10.pcaac344                   | -0.005676145 | 0.057411479 | 0.921387776 |
| pcaac320.lysopcac281           | 0.00122855   | 0.012426305 | 0.921388481 |
| pcaec424.smc161                | 0.007696426  | 0.077849059 | 0.921391207 |

|                              |              |             |             |
|------------------------------|--------------|-------------|-------------|
| pcaec342.methionine          | -0.005094448 | 0.051607515 | 0.921508662 |
| c51.serine                   | 0.0031977    | 0.032420501 | 0.921574597 |
| lysopcac160.pcaac364         | -0.00670586  | 0.068004687 | 0.921593017 |
| c2.isoleucine                | 0.001440439  | 0.014622615 | 0.92167322  |
| c2.pcaec444                  | 0.007125936  | 0.072345599 | 0.921680401 |
| c18.smc161                   | 0.007558076  | 0.076775236 | 0.921723474 |
| pcaec381.lysopcac281         | 0.001777304  | 0.018059405 | 0.921747167 |
| c101.c4                      | 0.001817517  | 0.018475661 | 0.921779417 |
| pcaec301.pcaac381            | -0.002930536 | 0.029791477 | 0.921783658 |
| pcaac401.c2                  | 0.009283163  | 0.094434449 | 0.921835605 |
| pcaec405.smc161              | -0.008749036 | 0.089003729 | 0.921838032 |
| methionine.glycine           | -0.008268682 | 0.08413834  | 0.921857699 |
| pcaac240.pcaec446            | 0.009338095  | 0.09502763  | 0.921863785 |
| smc260.pcaac420              | -0.008255148 | 0.08403951  | 0.921893731 |
| lysopcac281.pcaec445         | 0.00376644   | 0.038345906 | 0.921898992 |
| pcaac422.pcaec422            | -0.003036962 | 0.030944266 | 0.921962227 |
| leucine.smohc161             | -0.0014014   | 0.014280581 | 0.921969904 |
| pcaec321.pcaec403            | 0.0027522    | 0.028057069 | 0.922001871 |
| methioninesulfoxide.pcaac422 | -0.024214954 | 0.246905486 | 0.922017053 |
| ornithine.smc161             | 0.003595687  | 0.036671751 | 0.922035426 |
| smohc241.lysopcac280         | 0.001167234  | 0.011923482 | 0.922159771 |
| pcaac322.pcaac424            | 0.001344503  | 0.013734479 | 0.9221607   |
| smc181.creatinine            | -0.001193398 | 0.012194747 | 0.922185215 |
| c16.pcaec422                 | -0.00282656  | 0.028907788 | 0.922251104 |
| pcaac425.pcaac343            | 0.002149631  | 0.021984785 | 0.922251396 |
| pcaac364.pcaec364            | 0.002052554  | 0.021000121 | 0.922281529 |
| pcaac361.pcaac424            | -0.000763746 | 0.007815379 | 0.922294753 |
| serine.lysopcac140           | -0.000173627 | 0.001776849 | 0.92230028  |
| pcaac321.c3                  | -0.002245907 | 0.022986593 | 0.922309268 |
| pcaac426.threonine           | 0.001689425  | 0.017293983 | 0.922322332 |
| lysopcac161.pcaec364         | -0.002116161 | 0.02168814  | 0.922414565 |
| pcaec423.lysopcac204         | 0.004070336  | 0.041716938 | 0.922416085 |
| pcaec422.pcaac405            | -0.008745478 | 0.089677451 | 0.922454805 |
| pcaec421.lysopcac281         | -0.001336059 | 0.013713144 | 0.922528067 |
| pcaac386.lysopcac180         | 0.004969604  | 0.051037072 | 0.922572942 |
| pcaac360.pcaac422            | 0.004824597  | 0.04956028  | 0.922592264 |
| c3.pcaec363                  | 0.001791684  | 0.018408938 | 0.922609055 |
| pcaec380.c5                  | -0.002506339 | 0.025791454 | 0.922727765 |
| pcaac404.pcaec402            | 0.003718109  | 0.038278023 | 0.922761688 |
| pcaac420.pcaac343            | -0.002759607 | 0.028412587 | 0.922768106 |
| pcaac384.pcaac321            | 0.002370657  | 0.024438932 | 0.922865553 |
| c51.valine                   | -0.007479233 | 0.077193417 | 0.922955726 |
| smohc221.pcaac404            | 0.001121219  | 0.011572707 | 0.922959529 |

|                              |              |             |             |
|------------------------------|--------------|-------------|-------------|
| pcaac424.lysopcac281         | 0.001680653  | 0.017353872 | 0.92299023  |
| pcaec420.pcaac364            | 0.005447435  | 0.05628477  | 0.923039798 |
| lysopcac160.pcaac384         | 0.006164836  | 0.063737827 | 0.923088692 |
| c14.glycine                  | 0.005130571  | 0.053064436 | 0.923117312 |
| pcaec446.pcaec365            | 0.002960099  | 0.030657434 | 0.923221648 |
| pcaac402.pcaac320            | -0.011735582 | 0.121612811 | 0.92326485  |
| lysine.c51dc                 | 0.013526524  | 0.140243049 | 0.923303669 |
| c12.smc241                   | -0.002514381 | 0.026080492 | 0.923337032 |
| smc160.pcaac420              | -0.007093771 | 0.07360695  | 0.923364649 |
| pcaac341.c51dc               | 0.01161423   | 0.120615804 | 0.923430085 |
| pcaec361.lysine              | 0.008992175  | 0.093416964 | 0.923455954 |
| c2.serotonin                 | -0.009857197 | 0.102474332 | 0.923508763 |
| alanine.c2                   | -0.008138218 | 0.084624679 | 0.923527376 |
| c3.c51dc                     | 0.014898125  | 0.15518599  | 0.923659477 |
| pcaac402.putrescine          | 0.006379078  | 0.066491152 | 0.923709412 |
| c162.glycine                 | -0.002836017 | 0.029577611 | 0.923752886 |
| pcaac385.lysopcac140         | -0.000102464 | 0.001068893 | 0.923771862 |
| pcaec403.acetylnithoine      | -0.005472907 | 0.057128484 | 0.923819438 |
| pcaac341.pcaac421            | -0.001600898 | 0.016715359 | 0.923839965 |
| c14.pcaac240                 | -0.001241601 | 0.012964301 | 0.923842593 |
| pcaac402.pcaec403            | -0.016535349 | 0.172734181 | 0.923877167 |
| c2.pcaac421                  | 0.00618447   | 0.064629623 | 0.923905859 |
| lysopcac170.smc202           | 0.004580876  | 0.047883283 | 0.92392442  |
| pcaac240.citruline           | -0.004651934 | 0.04871276  | 0.924059425 |
| lysopcac140.pcaac401         | 0.001735405  | 0.018215621 | 0.924239453 |
| lysopcac180.pcaac406         | 0.003187154  | 0.033461146 | 0.924255916 |
| glutamicacid.lysopcac180     | 0.012514422  | 0.131454178 | 0.924295173 |
| smc260.lysine                | 0.006725438  | 0.070651929 | 0.924302092 |
| c2.prolinr                   | 0.002199576  | 0.023114449 | 0.924326614 |
| smc160.lysopcac204           | 0.003181741  | 0.033487756 | 0.924444079 |
| pcaac364.lysopcac181         | 0.004881561  | 0.051382441 | 0.924450109 |
| smohc141.c3                  | -0.002185383 | 0.023023431 | 0.924517109 |
| pcaec365.pcaac384            | -0.005340923 | 0.056271176 | 0.924521808 |
| smohc241.threonine           | 0.002473975  | 0.026108668 | 0.924646427 |
| smc240.c3                    | 0.003716832  | 0.039233942 | 0.924663637 |
| methioninesulfoxide.pcaac381 | 0.006009486  | 0.063534422 | 0.924781636 |
| pcaec360.c141                | 0.004349992  | 0.045995475 | 0.924791118 |
| pcaec364.pcaec401            | -0.006608956 | 0.069912044 | 0.924824338 |
| c14.isoleucine               | -0.001037078 | 0.010975711 | 0.924859194 |
| pcaac365.pcaec402            | 0.002976128  | 0.031523625 | 0.92492186  |
| pcaec342.pcaac421            | -0.001823642 | 0.019317186 | 0.924925241 |
| histidine.pcaec401           | 0.002620429  | 0.027802777 | 0.925047788 |
| arginine.smc161              | 0.005873946  | 0.062342175 | 0.925071221 |

|                               |              |             |             |
|-------------------------------|--------------|-------------|-------------|
| smohc221.c101                 | -0.000868038 | 0.009217545 | 0.925109827 |
| pcaac422.pcaac365             | 0.007548114  | 0.080156479 | 0.925113895 |
| pcaec405.valine               | -0.004903863 | 0.052084408 | 0.925125794 |
| pcaec403.pcaac322             | 0.006616672  | 0.070305506 | 0.92515679  |
| pcaac344.lysopcac160          | 0.002409698  | 0.025607648 | 0.925166637 |
| lysopcac203.phenylalanine     | 0.005933719  | 0.063124169 | 0.9252459   |
| pcaec381.lysopcac140          | -0.000214042 | 0.002281639 | 0.925396517 |
| pcaac420.smc260               | 0.003804583  | 0.040559275 | 0.925402666 |
| smc180.pcaac424               | -0.001292106 | 0.013805497 | 0.925568769 |
| pcaac386.pcaac281             | -0.000166039 | 0.001775655 | 0.925636159 |
| pcaac364.pcaec385             | -0.005684559 | 0.060868162 | 0.92572911  |
| c2.pcaac360                   | -0.003029886 | 0.032491934 | 0.925840872 |
| citruline.methioninesulfoxide | -0.001277476 | 0.013700457 | 0.925846465 |
| smc202.c0                     | 0.00010891   | 0.00116816  | 0.925855266 |
| smc240.pcaac323               | 0.00818618   | 0.087866974 | 0.9259081   |
| c10.pcaec321                  | 0.002847505  | 0.03057049  | 0.925924005 |
| pcaec424.pcaac360             | -0.004389818 | 0.047200076 | 0.926035886 |
| pcaac300.lysopcac281          | -0.001191699 | 0.012818125 | 0.926063362 |
| serotonin.c4                  | 0.001962708  | 0.021119074 | 0.92609072  |
| smc161.pcaec341               | 0.004107082  | 0.044241008 | 0.926170833 |
| pcaac404.lysopcac170          | 0.001380457  | 0.01487978  | 0.926218596 |
| pcaac403.pcaac320             | -0.008557883 | 0.09232147  | 0.926280044 |
| pcaac426.smohc222             | -0.00095237  | 0.010278906 | 0.92631469  |
| pcaac404.lysopcac180          | -0.006594945 | 0.071264352 | 0.926402616 |
| pcaec443.smc161               | -0.00969732  | 0.104795998 | 0.926407994 |
| pcaec421.pcaac343             | 0.001922886  | 0.020781157 | 0.926411908 |
| glutamine.pcaec405            | -0.007124083 | 0.077006351 | 0.926425664 |
| serotonin.pcaac240            | -0.002118856 | 0.022914395 | 0.926461032 |
| pcaec301.pcaac406             | 0.006904815  | 0.074778263 | 0.926565028 |
| pcaac403.lysopcac180          | 0.00730224   | 0.079082567 | 0.926565249 |
| pcaac403.lysopcac181          | 0.006648031  | 0.072033725 | 0.926602029 |
| c142.lysopcac140              | 0.000215838  | 0.002339004 | 0.926612106 |
| pcaac421.arginine             | -0.003066895 | 0.033254537 | 0.926654101 |
| lysopcac182.pcaac323          | -0.008994974 | 0.09761301  | 0.926713999 |
| lysopcac180.pcaac425          | -0.009003406 | 0.097735201 | 0.926736943 |
| c16.pcaac320                  | 0.005451748  | 0.059185922 | 0.926743413 |
| smc240.methionine             | -0.002748694 | 0.029850485 | 0.926767362 |
| isoleucine.pcaac323           | -0.009280278 | 0.100834046 | 0.926804546 |
| pcaac425.smc161               | -0.008491688 | 0.092405312 | 0.926914828 |
| pcaec380.lysopcac281          | 0.002049631  | 0.022311768 | 0.926940904 |
| pcaec321.lysopcac140          | 8.11E-05     | 0.000883118 | 0.926979276 |
| pcaec406.smohc222             | 0.000619531  | 0.00675026  | 0.927007828 |
| c18.pcaec364                  | 0.002100339  | 0.02288995  | 0.927024257 |

|                            |              |             |             |
|----------------------------|--------------|-------------|-------------|
| pcaec300.pcaac321          | 0.003767439  | 0.041209918 | 0.927291862 |
| pcaec365.pcaac402          | -0.003389933 | 0.03710783  | 0.927345096 |
| pcaec322.pcaac342          | -0.012869507 | 0.140932217 | 0.927374093 |
| smc181.smc161              | -0.009440479 | 0.10343746  | 0.927413352 |
| citruline.smc240           | 0.003659934  | 0.040105205 | 0.927420623 |
| serine.lysopcac170         | 0.003752662  | 0.041135163 | 0.927444993 |
| alphaaminoadipicacid.c5    | -0.00178463  | 0.019578434 | 0.927504288 |
| phenylalanine.serotonin    | -0.008283748 | 0.090979901 | 0.92758561  |
| pcaac404.smc241            | -0.002394523 | 0.026302833 | 0.927596405 |
| c141.isoleucine            | 0.001101403  | 0.012105967 | 0.927641211 |
| acetylmethionine.pcaec363  | 0.002022285  | 0.02225028  | 0.927714286 |
| acetylmethionine.smc160    | 0.007915137  | 0.087209544 | 0.927815871 |
| pcaac402.pcaac424          | -0.001870008 | 0.020666005 | 0.928032277 |
| c141.putrescine            | 0.003359397  | 0.037169226 | 0.928116361 |
| c5.smohc222                | -0.001741867 | 0.019273245 | 0.928119256 |
| pcaec402.pcaec420          | -0.001927379 | 0.021359135 | 0.928230888 |
| pcaec446.c5                | 0.000988583  | 0.010963152 | 0.928281241 |
| pcaec424.leucine           | -0.001178774 | 0.013078789 | 0.928316614 |
| lysopcac160.pcaec363       | 0.001806845  | 0.02004944  | 0.928323882 |
| pcaec321.pcaac365          | -0.002529146 | 0.028076085 | 0.928353729 |
| lysopcac180.pcaec341       | 0.003787693  | 0.042052119 | 0.928362029 |
| acetylmethionine.pcaac281  | -0.000377763 | 0.004195044 | 0.928379114 |
| pcaac384.pcaac240          | -0.00206958  | 0.023036167 | 0.928545204 |
| smc260.c181                | 0.001636601  | 0.018228858 | 0.92859253  |
| pcaec425.c8                | 0.004331873  | 0.048453259 | 0.928892097 |
| isoleucine.pcaec365        | 0.002943923  | 0.032936646 | 0.928909347 |
| acetylmethionine.smc161    | 0.009102809  | 0.101898463 | 0.928948408 |
| glutamine.c16              | -0.003826533 | 0.04284742  | 0.928969129 |
| c182.smc261                | 0.003460232  | 0.038796597 | 0.92906191  |
| pcaac321.ornithine         | 0.002076308  | 0.023281771 | 0.929067755 |
| c141.pcaec301              | -0.005853076 | 0.06566031  | 0.929099433 |
| lysopcac170.smohc241       | 0.006109472  | 0.068660775 | 0.929227329 |
| pcaac386.pcaac364          | -0.004432756 | 0.049896151 | 0.929339086 |
| pcaec403.lysopcac281       | 0.001765719  | 0.019887807 | 0.929383217 |
| pcaac386.pcaec360          | 0.000504199  | 0.005682853 | 0.929431756 |
| smohc141.pcaec321          | -0.005260991 | 0.059313439 | 0.929451346 |
| pcaec445.pcaac240          | -0.001929962 | 0.021761522 | 0.929460259 |
| lysine.transhydroxyproline | -0.003728467 | 0.042055882 | 0.929485518 |
| pcaac380.smohc222          | 0.000391212  | 0.004425059 | 0.929681329 |
| h1.pcaac383                | 0.001030903  | 0.011667089 | 0.929719647 |
| pcaec362.pcaec421          | 0.000321731  | 0.00364136  | 0.929723851 |
| pcaec383.pcaac322          | 0.006786026  | 0.076810185 | 0.929729108 |
| lysopcac161.pcaec446       | -0.004589784 | 0.051952248 | 0.929730526 |



|                                |              |             |             |
|--------------------------------|--------------|-------------|-------------|
| lysopcac161.pcaac361           | -0.012333477 | 0.139654885 | 0.929756102 |
| alanine.lysopcac281            | 0.00245261   | 0.027777518 | 0.929771332 |
| smc202.pcaec386                | -0.001208263 | 0.013699132 | 0.92984653  |
| c51.pcaac425                   | 0.007733733  | 0.087689354 | 0.929850747 |
| lysopcac204.transhydroxyprolin | -0.00447605  | 0.050770779 | 0.929876706 |
| pcaac361.pcaac402              | -0.001995246 | 0.022641729 | 0.929907999 |
| pcaac365.smc160                | -0.00748711  | 0.085149815 | 0.930061763 |
| lysopcac281.c141               | -0.002376508 | 0.027037624 | 0.930087425 |
| lysopcac281.threonine          | -0.002697556 | 0.030707448 | 0.930126598 |
| c16.pcaec363                   | -0.000473423 | 0.005389976 | 0.930136902 |
| arginine.valine                | -0.004025092 | 0.045849592 | 0.930172537 |
| c8.pcaac343                    | 0.001458224  | 0.0166165   | 0.930197486 |
| h1.pcaec380                    | -0.00589357  | 0.067171187 | 0.930211794 |
| c162.pcaac343                  | -0.003075321 | 0.035110101 | 0.930329833 |
| smc261.pcaec361                | -0.001183204 | 0.013512167 | 0.930349631 |
| c16.smc202                     | 0.001502668  | 0.017170905 | 0.930391996 |
| pcaec443.pcaac360              | -0.004902633 | 0.056052351 | 0.930429418 |
| pcaec425.pcaac320              | -0.006956272 | 0.079586575 | 0.930477147 |
| pcaec301.pcaac384              | 0.005180957  | 0.059320552 | 0.93053013  |
| pcaec422.pcaac343              | -0.001808052 | 0.020706594 | 0.93054648  |
| pcaac422.serine                | 0.008909985  | 0.102075212 | 0.930569702 |
| pcaac381.pcaec340              | -0.004350625 | 0.049871625 | 0.930610925 |
| histidine.smc260               | -0.001570276 | 0.018024404 | 0.930703781 |
| phenylalanine.pcaac343         | -0.002661399 | 0.030615093 | 0.930853318 |
| pcaac386.phenylalanine         | 0.002972915  | 0.034266652 | 0.930990348 |
| lysopcac181.pcaec382           | -0.000814217 | 0.009399594 | 0.931097959 |
| asymmetricdimethylarginine.spe | 0.005979728  | 0.069137211 | 0.9312026   |
| citruline.pcaec422             | 0.00291411   | 0.033732128 | 0.93128273  |
| pcaec402.pcaac281              | -0.000326647 | 0.003784044 | 0.931336267 |
| pcaec385.c3                    | -0.001715026 | 0.01988207  | 0.931385729 |
| pcaec343.pcaac365              | 0.003823139  | 0.044326407 | 0.93139385  |
| c141.c51dc                     | 0.013134064  | 0.152319072 | 0.931411614 |
| c141.lysopcac140               | 0.000179686  | 0.002084438 | 0.931430271 |
| pcaec340.pcaec420              | -0.002276154 | 0.02640853  | 0.931441135 |
| asparagine.c51                 | 0.007470687  | 0.086678247 | 0.931442233 |
| arginine.pcaac363              | 0.001503541  | 0.01744809  | 0.931455322 |
| pcaac344.pcaec361              | 0.001507318  | 0.017495968 | 0.931471133 |
| c141oh.pcaec422                | -0.001566893 | 0.01819894  | 0.931514188 |
| pcaec362.c18                   | 0.002915915  | 0.03392895  | 0.931638147 |
| pcaec363.pcaac426              | -0.003748155 | 0.043618964 | 0.931647925 |
| ornithine.pcaac383             | -0.001166589 | 0.013576299 | 0.931648816 |
| c181.lysopcac160               | 0.001209264  | 0.014082633 | 0.931695816 |
| pcaec406.pcaac425              | 0.009082904  | 0.105805706 | 0.931714866 |

|                                |              |             |             |
|--------------------------------|--------------|-------------|-------------|
| smohc161.spermidine            | -0.005920356 | 0.068969144 | 0.931718419 |
| h1.lysine                      | -0.00462713  | 0.053967768 | 0.931799261 |
| pcaec425.pcaac343              | 0.001308297  | 0.015266725 | 0.931833235 |
| pcaac384.pcaec402              | -0.002568495 | 0.029985798 | 0.931864104 |
| lysopcac204.pcaec365           | 0.001772625  | 0.020705582 | 0.931900644 |
| serine.lysopcac281             | -0.000789182 | 0.009227615 | 0.931969704 |
| kynurenine.pcaac240            | -0.001635239 | 0.01912065  | 0.931971137 |
| pcaec364.lysopcac203           | 0.001504996  | 0.017617243 | 0.932046309 |
| kynurenine.pcaac386            | 0.002884111  | 0.033809003 | 0.93214265  |
| pcaec386.lysopcac280           | -0.000712134 | 0.008352596 | 0.932179994 |
| c102.c10                       | -0.001954841 | 0.022950992 | 0.932246933 |
| c2.c3                          | 0.001941126  | 0.022815816 | 0.932323514 |
| asymmetricdimethylarginine.pca | 0.002603894  | 0.030634705 | 0.932386916 |
| pcaac403.c3                    | -0.005481412 | 0.064520957 | 0.932420765 |
| pcaec381.pcaec341              | -0.003754377 | 0.044220677 | 0.932464085 |
| pcaec445.pcaec420              | -0.002652116 | 0.031257349 | 0.932506299 |
| pcaac426.pcaac364              | 0.006790552  | 0.080045605 | 0.932517576 |
| c101.valine                    | -0.005349604 | 0.063119991 | 0.932581543 |
| pcaec364.pcaec365              | -0.006421406 | 0.075797612 | 0.932609424 |
| asparticacid.pcaac343          | 0.001441215  | 0.017012966 | 0.932613422 |
| pcaec321.lysopcac170           | -0.001239847 | 0.014641807 | 0.932640589 |
| pcaac424.pcaec445              | -0.006605239 | 0.078036792 | 0.932669074 |
| pcaec343.pcaec341              | -0.006701105 | 0.079207098 | 0.932701049 |
| pcaac362.lysopcac160           | -0.004573468 | 0.054102594 | 0.932755878 |
| lysopcac182.c5                 | 0.000784543  | 0.009287091 | 0.932800726 |
| c2.methionine                  | -0.001780824 | 0.021095951 | 0.932849344 |
| pcaec365.phenylalanine         | 0.002302621  | 0.027291302 | 0.932883843 |
| c141oh.pcaec405                | -0.004831374 | 0.057293892 | 0.932920206 |
| serine.glycine                 | 0.002205299  | 0.026175573 | 0.932980429 |
| c12.pcaec343                   | 0.007716189  | 0.091601195 | 0.932991153 |
| smohc241.spermidine            | -0.006056202 | 0.071896196 | 0.932992272 |
| isoleucine.threonine           | -0.002276152 | 0.027066588 | 0.933104034 |
| pcaec365.asparagine            | -0.000822898 | 0.009788381 | 0.933124377 |
| putrescine.acetylnithoine      | 0.002639649  | 0.031401635 | 0.933130729 |
| pcaec382.smohc161              | 0.00234358   | 0.027899365 | 0.933178107 |
| lysopcac181.c102               | 0.004581096  | 0.05454424  | 0.93318808  |
| lysopcac181.lysopcac204        | 0.004852746  | 0.057803858 | 0.933217188 |
| pcaec301.pcaac300              | -0.008120747 | 0.09680864  | 0.93327069  |
| pcaac321.putrescine            | -0.003505329 | 0.041804484 | 0.933297664 |
| c5.pcaec380                    | -0.006332326 | 0.075552118 | 0.93332665  |
| pcaec423.smc261                | 0.003251258  | 0.038791472 | 0.933326873 |
| pcaec446.smohc222              | -0.000285477 | 0.003407425 | 0.93335294  |
| pcaec360.pcaec322              | 0.00549294   | 0.065598247 | 0.933388503 |

|                      |              |             |             |
|----------------------|--------------|-------------|-------------|
| pcaec383.pcaec403    | -0.012703905 | 0.15236204  | 0.933671319 |
| pcaac422.pcaac424    | 0.000932505  | 0.011186787 | 0.933688807 |
| isoleucine.c102      | 0.001381167  | 0.016574505 | 0.933710155 |
| putrescine.pcaac424  | -0.002438754 | 0.029286568 | 0.933756744 |
| smohc222.pcaac425    | 0.007282317  | 0.087514587 | 0.933803954 |
| smc240.pcaac404      | 0.000390598  | 0.004694592 | 0.933812622 |
| pcaac421.smc260      | 0.003165895  | 0.038066451 | 0.933839669 |
| pcaec404.pcaac425    | 0.00995496   | 0.119961279 | 0.933984772 |
| pcaac343.lysopcac161 | 0.007244324  | 0.087352604 | 0.93402668  |
| pcaac426.valine      | -0.005476318 | 0.066083566 | 0.934076188 |
| pcaac366.pcaec444    | 0.008626398  | 0.104293956 | 0.934200992 |
| pcaac363.ornithine   | -0.003947825 | 0.047778805 | 0.934268646 |
| pcaac321.arginine    | 0.004086961  | 0.049506335 | 0.934326434 |
| pcaec383.c8          | -0.004094821 | 0.049656087 | 0.934398411 |
| pcaec446.lysopcac280 | 0.000580509  | 0.007040641 | 0.934408303 |
| methionine.pcaac384  | 0.004344717  | 0.052717156 | 0.934436503 |
| prolinr.smc161       | -0.005987844 | 0.072660952 | 0.934442551 |
| pcaac402.c141oh      | 0.009327592  | 0.113208021 | 0.934454152 |
| glutamine.pcaec444   | -0.009375613 | 0.113858196 | 0.934492838 |
| serotonin.pcaec341   | 0.005525574  | 0.067224922 | 0.934611357 |
| phenylalanine.h1     | -0.000481171 | 0.005856249 | 0.934636401 |
| pcaac344.smc260      | 0.00195171   | 0.023759835 | 0.934652692 |
| pcaec425.smc261      | -0.005927775 | 0.072167043 | 0.93465556  |
| pcaec363.pcaec402    | -0.004703243 | 0.057289125 | 0.934689708 |
| lysopcac170.pcaec386 | -0.001085942 | 0.013229854 | 0.934700746 |
| lysopcac140.c2       | -0.004576505 | 0.055842447 | 0.934803009 |
| lysopcac140.c3       | -0.003783491 | 0.046206595 | 0.934860015 |
| pcaec386.pcaec321    | 0.005530961  | 0.067580385 | 0.934891249 |
| c142.kynurenine      | 0.000620848  | 0.007602748 | 0.935035451 |
| lysopcac182.taurine  | 0.004091253  | 0.050101539 | 0.935036882 |
| pcaec403.pcaec322    | -0.004257059 | 0.052210169 | 0.935133922 |
| c12.isoleucine       | -0.000742558 | 0.00911184  | 0.935168198 |
| c51.lysopcac140      | -0.000169901 | 0.002086645 | 0.935224193 |
| pcaec422.c51dc       | 0.011916495  | 0.146491637 | 0.935285587 |
| smc160.lysopcac140   | 7.76E-05     | 0.000955098 | 0.935349963 |
| pcaac401.lysine      | 0.008118051  | 0.099921546 | 0.935366278 |
| smohc221.pcaac343    | -0.001825237 | 0.022477329 | 0.935398661 |
| pcaac240.c102        | -0.005138218 | 0.063327743 | 0.935451475 |
| ornithine.arginine   | -0.00172388  | 0.021270602 | 0.935524295 |
| pcaac421.pcaec341    | -0.002607368 | 0.032175964 | 0.935532662 |
| pcaec382.pcaec420    | -0.002833328 | 0.035046714 | 0.935683746 |
| c102.glutamicacid    | 0.003197928  | 0.03955828  | 0.935686429 |
| c4.methionine        | 0.002677926  | 0.033147969 | 0.935729222 |

|                                 |              |             |             |
|---------------------------------|--------------|-------------|-------------|
| c18.pcaac240                    | -0.001721444 | 0.021310917 | 0.935736745 |
| arginine.lysopcac161            | -0.006515965 | 0.080766009 | 0.935816509 |
| smohc222.lysopcac182            | -0.002044872 | 0.025385937 | 0.935916309 |
| putrescine.pcaec384             | -0.001311387 | 0.016283215 | 0.93592838  |
| c142.spermidine                 | 0.005661112  | 0.070294316 | 0.935929745 |
| pcaac426.smc260                 | -0.002201808 | 0.02735854  | 0.935973146 |
| glycine.c2                      | -0.005805546 | 0.072266197 | 0.936087609 |
| isoleucine.c5                   | 0.001250958  | 0.015579158 | 0.936118305 |
| asymmetricdimethylarginine.lysc | 0.001701727  | 0.021205311 | 0.936155508 |
| smc161.pcaac381                 | 0.002746916  | 0.034235275 | 0.936166305 |
| pcaec404.lysopcac140            | -0.000192164 | 0.002395146 | 0.936171091 |
| pcaac322.pcaac344               | -0.008584831 | 0.107005389 | 0.936172976 |
| pcaec341.pcaec420               | -0.002330175 | 0.029059665 | 0.93620644  |
| lysopcac170.pcaac425            | -0.006421132 | 0.080135931 | 0.936252385 |
| lysopcac170.pcaac343            | 0.002030382  | 0.025339282 | 0.936252522 |
| asparagine.h1                   | 0.000480987  | 0.006005171 | 0.936278152 |
| pcaac421.pcaac281               | -0.000250977 | 0.003146739 | 0.936546311 |
| pcaec401.pcaec365               | 0.00262372   | 0.032908493 | 0.936570134 |
| lysine.pcaec301                 | 0.005507859  | 0.069168303 | 0.936647877 |
| pcaac281.c182                   | 0.003326213  | 0.04177211  | 0.936649638 |
| pcaac381.c14                    | 0.004297432  | 0.0540131   | 0.936701099 |
| c10.pcaec423                    | -0.006860548 | 0.086228704 | 0.936701537 |
| pcaec404.lysopcac204            | 0.006282394  | 0.078975682 | 0.93671247  |
| pcaec401.pcaac363               | 0.004340057  | 0.054566079 | 0.936721055 |
| c141.pcaac240                   | 0.000932046  | 0.011736875 | 0.936820987 |
| pcaac381.pcaac403               | 0.000826665  | 0.010413228 | 0.936841424 |
| pcaec381.c16                    | -0.002999632 | 0.037835063 | 0.936924159 |
| c101.pcaac384                   | -0.003402993 | 0.042938141 | 0.936946732 |
| c51dc.ornithine                 | 0.003312864  | 0.041843675 | 0.937011027 |
| pcaac322.serotonin              | 0.006714228  | 0.084864347 | 0.937054861 |
| glutamine.pcaac363              | 0.001519765  | 0.019233909 | 0.93713608  |
| pcaac343.smc160                 | -0.007686351 | 0.097308197 | 0.937156024 |
| pcaec322.smc161                 | -0.008562895 | 0.108426901 | 0.937168622 |
| pcaec381.pcaac425               | -0.011032816 | 0.139805886 | 0.937215184 |
| pcaec403.pcaac421               | -0.001690383 | 0.021425468 | 0.937230508 |
| pcaec300.pcaec404               | 0.002291833  | 0.029070285 | 0.937276797 |
| c182.pcaac360                   | -0.001969615 | 0.025058929 | 0.937466019 |
| pcaac361.ornithine              | -0.001780368 | 0.022670728 | 0.93751981  |
| histidine.c4                    | -0.001129487 | 0.014410915 | 0.937642366 |
| pcaec364.creatinine             | -0.003275053 | 0.041815159 | 0.937686082 |
| pcaac424.c141oh                 | 0.007272267  | 0.092896635 | 0.93771682  |
| smc202.pcaec403                 | -0.001177391 | 0.015059377 | 0.937796344 |
| pcaac281.lysopcac140            | 6.99E-05     | 0.000894223 | 0.937824158 |

|                                 |              |             |             |
|---------------------------------|--------------|-------------|-------------|
| alphaaminoadipicacid.pcaac322   | -0.004615174 | 0.059060423 | 0.937828118 |
| histidine.c12                   | -0.007492696 | 0.095970593 | 0.937884031 |
| c141oh.pcaac421                 | 0.001066302  | 0.013660195 | 0.93789494  |
| pcaec443.c0                     | 0.000197243  | 0.002528538 | 0.937936564 |
| pcaec360.smc180                 | -0.003309834 | 0.042436444 | 0.937945771 |
| c0.pcaec383                     | 0.006457474  | 0.08279898  | 0.93794998  |
| pcaac320.pcaec343               | 0.009071085  | 0.116366659 | 0.937979488 |
| c102.pcaec401                   | 0.005371404  | 0.069041759 | 0.938101173 |
| c5.putrescine                   | 0.004795995  | 0.06167272  | 0.938128245 |
| c12.lysopcac281                 | 0.001930436  | 0.024847521 | 0.93818696  |
| ornithine.pcaec420              | 0.003030401  | 0.039033042 | 0.938230239 |
| smc241.lysopcac161              | -0.007233897 | 0.093217143 | 0.93825736  |
| pcaec384.pcaac320               | 0.008001668  | 0.103121021 | 0.938263491 |
| smohc222.pcaac364               | -0.004050169 | 0.052225973 | 0.93829848  |
| c102.c16                        | 0.002329845  | 0.03004396  | 0.938300858 |
| pcaec342.c18                    | 0.002352955  | 0.030367546 | 0.938352715 |
| pcaac422.pcaac364               | 0.00568024   | 0.073415444 | 0.938441142 |
| arginine.isoleucine             | -0.002432912 | 0.03144773  | 0.938447106 |
| pcaac323.pcaac426               | 0.006778129  | 0.087632812 | 0.938460403 |
| arginine.methionine             | 0.002017411  | 0.026112515 | 0.93853071  |
| pcaec340.pcaec322               | -0.006157941 | 0.079711175 | 0.938534858 |
| smohc161.c3                     | 0.001438602  | 0.01865263  | 0.938635855 |
| smc180.pcaec401                 | -0.00182826  | 0.023765115 | 0.938791149 |
| lysopcac180.pcaec385            | 0.003743243  | 0.048680648 | 0.938820164 |
| putrescine.spermidine           | -0.005394749 | 0.070174327 | 0.938834041 |
| smohc161.pcaec403               | -0.002487135 | 0.032414454 | 0.938950932 |
| c141.c0                         | 0.000110854  | 0.001445233 | 0.938971496 |
| pcaec364.pcaac240               | 0.001145646  | 0.014949472 | 0.939026079 |
| pcaec420.taurine                | -0.001855281 | 0.024211278 | 0.939030649 |
| serotonin.lysopcac161           | 0.006359546  | 0.083119909 | 0.939124583 |
| creatinine.pcaec445             | -0.005148948 | 0.067592509 | 0.93938996  |
| smc181.pcaec443                 | -0.007579223 | 0.099579032 | 0.939440518 |
| ornithine.pcaec341              | -0.002794525 | 0.036728243 | 0.939461249 |
| pcaec424.smohc161               | 0.001147374  | 0.01508632  | 0.939487119 |
| pcaac386.tyrosine               | 0.004548675  | 0.059842869 | 0.939521784 |
| pcaac401.c102                   | -0.002904742 | 0.038254822 | 0.939584453 |
| pcaec446.pcaec382               | -0.001150568 | 0.01517365  | 0.939667571 |
| creatinine.lysopcac161          | 0.005638585  | 0.074367888 | 0.939672781 |
| alphaaminoadipicacid.tryptophar | -0.000892312 | 0.01177967  | 0.939728341 |
| pcaac363.pcaac402               | -0.005226014 | 0.069018228 | 0.939752851 |
| c101.smc241                     | 0.001071567  | 0.01416     | 0.93978757  |
| pcaac300.pcaac361               | -0.005697743 | 0.075338447 | 0.939824895 |
| pcaec443.c51dc                  | -0.010915297 | 0.144717683 | 0.939986783 |

|                          |              |             |             |
|--------------------------|--------------|-------------|-------------|
| lysopcac161.glutamicacid | 0.00441259   | 0.058573263 | 0.94005844  |
| pcaec321.pcaac421        | 0.00089592   | 0.011902092 | 0.940106384 |
| lysopcac161.prolinr      | 0.004220388  | 0.056111802 | 0.940154238 |
| pcaec401.pcaec445        | 0.003329676  | 0.044369226 | 0.940288608 |
| prolinr.arginine         | -0.001794439 | 0.023916179 | 0.940300018 |
| c51.pcaec444             | -0.006334332 | 0.084607746 | 0.940429706 |
| asparticacid.pcaec301    | 0.006209     | 0.082999999 | 0.940477212 |
| c0.pcaec421              | 0.000199427  | 0.002670765 | 0.940585899 |
| pcaec420.pcaac343        | 0.004430394  | 0.059373003 | 0.940626174 |
| c12.pcaac384             | 0.004612515  | 0.061879996 | 0.940689693 |
| pcaac363.pcaec343        | -0.007257483 | 0.097497709 | 0.940770869 |
| c101.prolinr             | -0.003054709 | 0.041058363 | 0.940801284 |
| prolinr.kynurenine       | 0.000857212  | 0.011522233 | 0.940803567 |
| c16.c102                 | -0.002703257 | 0.036343093 | 0.940815256 |
| asparagine.pcaec443      | -0.003693903 | 0.049756206 | 0.940927678 |
| smc180.pcaac364          | -0.003905868 | 0.052611841 | 0.940928234 |
| c0.pcaac425              | -0.005986159 | 0.080637205 | 0.940931128 |
| c142.smc241              | 0.000949722  | 0.012808645 | 0.941001597 |
| pcaac404.lysopcac182     | 0.002083815  | 0.028112472 | 0.941019673 |
| creatinine.pcaac300      | -0.003356462 | 0.045355809 | 0.941116017 |
| smc241.pcaec421          | -0.000427925 | 0.005784264 | 0.94113345  |
| pcaac343.pcaac404        | -0.000437901 | 0.005920089 | 0.941143197 |
| h1.histidine             | -0.003313894 | 0.044908935 | 0.941283995 |
| lysopcac280.isoleucine   | -0.001745624 | 0.02366477  | 0.941305236 |
| pcaec383.pcaec341        | -0.003330296 | 0.045149494 | 0.941307722 |
| pcaac380.pcaac300        | -0.00425813  | 0.057743575 | 0.941323196 |
| c141.lysopcac281         | 0.000830726  | 0.011310378 | 0.941556649 |
| asparticacid.taurine     | -0.005328149 | 0.072575517 | 0.941582772 |
| pcaac402.pcaec322        | -0.004705459 | 0.064206645 | 0.941685288 |
| pcaec381.glycine         | 0.001013239  | 0.013833082 | 0.941715972 |
| smc261.c8                | -0.002589399 | 0.035357823 | 0.941726623 |
| smc160.c3                | -0.001581821 | 0.021606499 | 0.941745441 |
| asparagine.isoleucine    | 0.001815565  | 0.024817695 | 0.941788625 |
| smc181.pcaac365          | -0.004727953 | 0.064676331 | 0.941831772 |
| pcaac383.pcaec403        | -0.004096744 | 0.056094654 | 0.941886623 |
| pcaac360.c2              | 0.0051885    | 0.071062512 | 0.941902123 |
| pcaac344.threonine       | -0.002416165 | 0.033096999 | 0.941910579 |
| pcaec406.pcaec401        | 0.002318653  | 0.031783387 | 0.941950934 |
| pcaec402.c4              | -0.001736293 | 0.023802683 | 0.941956064 |
| c4.c51dc                 | 0.011303199  | 0.154958729 | 0.941957637 |
| c51dc.smc260             | -0.002480205 | 0.034025435 | 0.941997829 |
| smc161.taurine           | -0.002396674 | 0.032922336 | 0.942073179 |
| c8.pcaac383              | 0.000463069  | 0.006378767 | 0.942233924 |

|                               |              |             |             |
|-------------------------------|--------------|-------------|-------------|
| pcaac366.smc260               | 0.002055182  | 0.028328313 | 0.942271061 |
| serine.arginine               | -0.005502151 | 0.075911415 | 0.942324667 |
| pcaac403.smc261               | -0.005673513 | 0.078340747 | 0.942372523 |
| pcaec446.pcaec386             | -0.000394637 | 0.005457624 | 0.942461155 |
| smc261.c4                     | 0.001659447  | 0.022953242 | 0.942471126 |
| prolinr.smohc222              | 0.000423562  | 0.005863578 | 0.94251942  |
| c142.smc180                   | -0.001907174 | 0.026414745 | 0.942547168 |
| pcaec301.pcaec363             | -0.00399872  | 0.055385091 | 0.942549243 |
| c3.pcaac360                   | -0.002616716 | 0.036245938 | 0.942553317 |
| phenylalanine.prolinr         | -0.003941715 | 0.054602637 | 0.9425567   |
| c2.asymmetricdimethylarginine | -0.0014439   | 0.020009624 | 0.942579614 |
| c2.pcaec422                   | -0.003731326 | 0.051776689 | 0.94265468  |
| lysopcac160.pcaac426          | -0.005473777 | 0.07599432  | 0.942684064 |
| creatinine.pcaec380           | 0.003681096  | 0.051109617 | 0.942688204 |
| smc240.smc161                 | -0.010464965 | 0.145369386 | 0.942715824 |
| pcaec403.pcaac404             | -0.001338085 | 0.018648612 | 0.942903509 |
| pcaec383.lysopcac140          | 0.000161883  | 0.002257151 | 0.942929237 |
| kynurenine.arginine           | -0.002138755 | 0.029871717 | 0.943026252 |
| pcaac421.pcaac425             | 0.00903069   | 0.126211015 | 0.943062539 |
| prolinr.pcaec446              | 0.004015171  | 0.0561678   | 0.943115795 |
| pcaac421.lysopcac280          | -0.000614605 | 0.008611922 | 0.943209917 |
| smc180.arginine               | -0.001800117 | 0.025300725 | 0.943383061 |
| pcaac240.c16                  | -0.001035427 | 0.014566175 | 0.943434298 |
| h1.pcaec406                   | 0.001375155  | 0.019372515 | 0.943513338 |
| c18.pcaec340                  | -0.004442253 | 0.062593752 | 0.943525446 |
| c102.pcaac402                 | -0.001145035 | 0.016134785 | 0.943527627 |
| phenylalanine.pcaac386        | 0.002556565  | 0.036088668 | 0.943627439 |
| pcaec322.pcaec341             | -0.006103746 | 0.086221841 | 0.943667182 |
| pcaac362.pcaec421             | 0.000424501  | 0.006018293 | 0.943870668 |
| pcaac366.arginine             | -0.004527915 | 0.064257477 | 0.943926172 |
| pcaec322.lysopcac140          | 0.000102701  | 0.001465249 | 0.944223367 |
| pcaec425.lysopcac140          | -0.000170706 | 0.002437654 | 0.944272925 |
| pcaec406.phenylalanine        | 0.002044939  | 0.029229727 | 0.944326779 |
| pcaec343.pcaac344             | 0.006201229  | 0.088662429 | 0.944341798 |
| c5.pcaac405                   | -0.010895254 | 0.156008163 | 0.944424665 |
| lysopcac280.pcaec402          | 0.006605834  | 0.09470402  | 0.944492434 |
| pcaac420.arginine             | 0.002405877  | 0.03449388  | 0.944495999 |
| pcaac240.taurine              | -0.003455464 | 0.049546002 | 0.944500283 |
| pcaec365.lysopcac161          | 0.007285618  | 0.104507992 | 0.944523352 |
| pcaac363.threonine            | -0.002337727 | 0.033537992 | 0.944531027 |
| methionine.lysopcac203        | -0.001928343 | 0.027742298 | 0.944685734 |
| pcaec300.pcaac344             | 0.007100272  | 0.102156708 | 0.94469001  |
| smc260.c3                     | 0.002292444  | 0.033023174 | 0.944757141 |

|                                |              |             |             |
|--------------------------------|--------------|-------------|-------------|
| smc160.pcaac365                | 0.004962299  | 0.071493085 | 0.944764882 |
| pcaec443.pcaac421              | -0.001205343 | 0.017373024 | 0.944788192 |
| c2.c162                        | 0.00662795   | 0.095627294 | 0.944843748 |
| pcaec341.pcaac364              | -0.001877129 | 0.027103549 | 0.944885505 |
| pcaac320.pcaac343              | 0.004369135  | 0.063124495 | 0.944919748 |
| pcaec423.pcaac404              | -0.001724944 | 0.024939785 | 0.94495965  |
| pcaec424.pcaac343              | 0.001068233  | 0.015451744 | 0.944984151 |
| c16.c51dc                      | 0.005272044  | 0.076325554 | 0.945032139 |
| smc180.lysopcac161             | -0.00514508  | 0.074585753 | 0.945104465 |
| pcaac362.spermidine            | -0.005006926 | 0.072625506 | 0.94513655  |
| c51dc.pcaac424                 | 0.00080393   | 0.011666471 | 0.945162169 |
| lysopcac160.lysopcac204        | 0.005130498  | 0.074663486 | 0.945316704 |
| methionine.pcaac365            | -0.002595088 | 0.037776242 | 0.945331522 |
| pcaac385.lysopcac160           | 0.001865936  | 0.027168952 | 0.945345287 |
| pcaec381.pcaac380              | -0.006623419 | 0.096555648 | 0.945410501 |
| phenylalanine.pcaac421         | 0.001332555  | 0.019456321 | 0.945495773 |
| prolinr.lysopcac281            | -0.00137198  | 0.020091067 | 0.945655889 |
| glycine.pcaec403               | 0.00158114   | 0.023164768 | 0.945681191 |
| pcaac342.pcaac343              | 0.002386973  | 0.03499582  | 0.945719997 |
| pcaec385.c5                    | 0.000689816  | 0.010116513 | 0.945736066 |
| pcaac362.c51dc                 | 0.00848639   | 0.1244743   | 0.945743468 |
| pcaac342.smc241                | 0.000785055  | 0.011520359 | 0.945769534 |
| c10.pcaac383                   | -0.000432497 | 0.006348535 | 0.945785063 |
| methioninesulfoxide.pcaec343   | -0.008966013 | 0.131838957 | 0.945878966 |
| pcaac364.pcaec402              | -0.001821562 | 0.026835913 | 0.945981893 |
| smohc222.lysopcac280           | 0.000670857  | 0.009900312 | 0.946074518 |
| pcaec404.c2                    | -0.006630694 | 0.097931618 | 0.946117285 |
| c10.smc241                     | 0.002367522  | 0.035058155 | 0.946257214 |
| lysopcac281.lysopcac180        | 0.004446302  | 0.06593973  | 0.946337868 |
| pcaac363.c101                  | 0.000688784  | 0.010264283 | 0.946596021 |
| lysopcac140.arginine           | -0.003872027 | 0.057893081 | 0.946772847 |
| pcaec341.c3                    | 0.004207966  | 0.063024327 | 0.946864266 |
| pcaec443.acetylornithoine      | -0.003939752 | 0.059173139 | 0.947013069 |
| pcaec443.lysopcac281           | 0.001019437  | 0.015325364 | 0.947061119 |
| alphaaminoadipicacid.serotonin | -0.006516975 | 0.097978553 | 0.947065339 |
| pcaec362.smohc241              | -0.008661585 | 0.130511181 | 0.9471827   |
| lysopcac160.threonine          | 0.00146108   | 0.022095761 | 0.947374799 |
| pcaec380.arginine              | -0.004484992 | 0.067862698 | 0.947403143 |
| pcaac386.smc261                | 0.002201032  | 0.033328059 | 0.947441136 |
| pcaac425.pcaec341              | -0.002790626 | 0.04229034  | 0.947484128 |
| c4.pcaec380                    | -0.003400341 | 0.051541253 | 0.947495341 |
| citruline.threonine            | -0.003588308 | 0.054515175 | 0.94761534  |
| smc241.pcaec384                | -0.008027629 | 0.122131112 | 0.947688926 |



|                              |              |             |             |
|------------------------------|--------------|-------------|-------------|
| pcaec386.pcaec341            | -0.005934232 | 0.090537536 | 0.947836075 |
| acetylmethionine.tyrosine    | -0.004125054 | 0.062943157 | 0.947842637 |
| pcaec380.kynurenine          | 0.000798462  | 0.012211841 | 0.947963378 |
| glycine.methioninesulfoxide  | 0.001678709  | 0.025681312 | 0.947977122 |
| smc180.lysopcac170           | 0.001187734  | 0.018194341 | 0.948045896 |
| pcaec322.c5                  | -0.000389187 | 0.00597033  | 0.948120223 |
| pcaec340.pcaac360            | -0.00318624  | 0.048999883 | 0.94824852  |
| lysopcac160.pcaac406         | 0.002585175  | 0.039766383 | 0.948261547 |
| c162.pcaec365                | 0.001559791  | 0.024076846 | 0.948440541 |
| smohc241.pcaec422            | 0.001690691  | 0.026120371 | 0.948485789 |
| pcaac343.smc261              | -0.002245153 | 0.034736357 | 0.948559547 |
| pcaac422.valine              | -0.003329255 | 0.051539448 | 0.948589632 |
| pcaac321.pcaac406            | 0.003707469  | 0.057395094 | 0.948590169 |
| pcaec342.pcaec343            | -0.008770527 | 0.135777877 | 0.948590886 |
| pcaec383.pcaec322            | -0.004210855 | 0.065193891 | 0.948594817 |
| pcaac406.pcaec380            | 0.00362683   | 0.056172761 | 0.948613958 |
| c5.c8                        | 0.006747451  | 0.10451029  | 0.948616412 |
| smc180.pcaac404              | -0.00075355  | 0.011675263 | 0.948632375 |
| pcaac384.lysopcac140         | -0.000374718 | 0.005820317 | 0.948760698 |
| pcaac300.pcaac404            | 0.00026086   | 0.004061164 | 0.948878412 |
| pcaac300.methioninesulfoxide | 0.002827776  | 0.044051745 | 0.948910793 |
| c14.ornithine                | 0.002261643  | 0.035241025 | 0.948923299 |
| pcaac362.histidine           | -0.003648312 | 0.056909317 | 0.948978104 |
| pcaec406.pcaec363            | -0.002919683 | 0.045551455 | 0.948986925 |
| c0.c141oh                    | -0.00780631  | 0.121908163 | 0.949036214 |
| pcaac363.lysopcac180         | 0.004129962  | 0.064516234 | 0.949052142 |
| pcaec380.lysopcac180         | 0.005241099  | 0.08188647  | 0.949059974 |
| c141.ornithine               | 0.002118764  | 0.033173073 | 0.949166839 |
| lysopcac180.methionine       | 0.002091095  | 0.03275427  | 0.949189174 |
| pcaac405.c4                  | -0.00108601  | 0.017014017 | 0.949198394 |
| pcaec424.pcaec341            | -0.001965663 | 0.030802028 | 0.949209723 |
| pcaac363.pcaec340            | 0.004474705  | 0.070606067 | 0.949559756 |
| smc161.c18                   | 0.001691487  | 0.026695207 | 0.949569846 |
| pcaec340.phenylalanine       | 0.001441985  | 0.022799307 | 0.949662114 |
| smohc221.methionine          | 0.001678285  | 0.026583258 | 0.949752481 |
| smohc241.methionine          | -0.002074705 | 0.032877376 | 0.949775407 |
| c16.lysopcac161              | -0.005156062 | 0.081722259 | 0.949784801 |
| c181.pcaac343                | -0.001717178 | 0.027227146 | 0.949803795 |
| c141oh.pcaac323              | -0.005827773 | 0.092408122 | 0.94980619  |
| glutamine.smohc241           | 0.005265737  | 0.083529681 | 0.949826287 |
| pcaac405.c162                | -0.004040015 | 0.064093282 | 0.949831808 |
| c14.prolinr                  | -0.002828891 | 0.044901727 | 0.94985688  |
| smc160.c5                    | -0.000506203 | 0.008039572 | 0.949886956 |

|                         |              |             |             |
|-------------------------|--------------|-------------|-------------|
| pcaec404.lysine         | 0.006579707  | 0.104548109 | 0.949910206 |
| pcaec444.c101           | -0.002168847 | 0.034498887 | 0.949963918 |
| lysine.pcaec446         | 0.003580321  | 0.057013039 | 0.950018657 |
| pcaec362.pcaec446       | -0.00251037  | 0.039991358 | 0.950038912 |
| glycine.pcaac344        | -0.0023527   | 0.037527469 | 0.950102555 |
| pcaac381.phenylalanine  | 0.003067419  | 0.049098421 | 0.95027571  |
| pcaec403.pcaac344       | 0.00618333   | 0.098989191 | 0.950283816 |
| lysopcac204.pcaac424    | -0.000334441 | 0.005356522 | 0.950306469 |
| pcaec443.taurine        | 0.003936007  | 0.063250496 | 0.950471271 |
| glutamicacid.pcaec365   | 0.002683623  | 0.043235628 | 0.950597778 |
| c18.asparagine          | -0.001136266 | 0.018308215 | 0.950602973 |
| pcaec385.pcaec321       | 0.004046975  | 0.065321045 | 0.950688851 |
| creatinine.smc240       | 0.00269612   | 0.043546364 | 0.950721721 |
| pcaec340.pcaac321       | -0.002214084 | 0.035799401 | 0.950774839 |
| pcaec405.pcaac300       | 0.003509926  | 0.056888105 | 0.950892646 |
| smc161.pcaac365         | -0.003293572 | 0.053412935 | 0.950921512 |
| pcaec342.pcaac365       | -0.002556598 | 0.041535386 | 0.951009084 |
| alanine.pcaac240        | 0.000867202  | 0.014090147 | 0.951013519 |
| pcaac360.pcaac322       | -0.004584215 | 0.074583629 | 0.951079192 |
| pcaac386.pcaac363       | 0.000983461  | 0.016019915 | 0.951138175 |
| lysopcac203.lysopcac180 | -0.003563781 | 0.058176627 | 0.951243056 |
| lysopcac140.lysopcac182 | 0.001107794  | 0.018107905 | 0.951307096 |
| pcaec341.smc160         | -0.007001656 | 0.114453013 | 0.951309045 |
| glycine.kynurenine      | 0.000864673  | 0.014158276 | 0.951390964 |
| c8.pcaac384             | 0.005699083  | 0.093611291 | 0.951543262 |
| pcaec321.c141           | 0.001803881  | 0.029634375 | 0.951550481 |
| pcaec341.lysopcac170    | 0.000703138  | 0.011552507 | 0.951555817 |
| pcaec386.c5             | -0.00049495  | 0.008136326 | 0.951581532 |
| pcaec380.smohc161       | -0.0010165   | 0.016712456 | 0.951588897 |
| pcaac420.pcaec343       | -0.007579767 | 0.124779341 | 0.951650528 |
| smc202.pcaec341         | 0.004450104  | 0.073270018 | 0.951658229 |
| pcaec383.smc161         | 0.00600314   | 0.098976265 | 0.951724491 |
| smc261.smc260           | -0.003167488 | 0.052225628 | 0.951726282 |
| pcaac363.smc160         | -0.004947485 | 0.08187723  | 0.951904688 |
| c2.pcaac425             | 0.002822223  | 0.046735124 | 0.951934915 |
| asparticacid.c14        | 0.003185543  | 0.052763489 | 0.951945744 |
| smc241.c3               | 0.001070179  | 0.017799631 | 0.952144752 |
| pcaec420.asparticacid   | -0.002095211 | 0.034864159 | 0.952166427 |
| pcaac342.pcaac421       | -0.00097948  | 0.016308572 | 0.952195984 |
| lysopcac140.smc260      | 0.001766003  | 0.029419646 | 0.95222081  |
| pcaac384.pcaec422       | -0.001984969 | 0.033119329 | 0.952295662 |
| asparticacid.pcaec445   | 0.004720226  | 0.078779935 | 0.952309374 |
| lysopcac140.glycine     | 0.003365222  | 0.056254788 | 0.952385312 |

|                                |              |             |             |
|--------------------------------|--------------|-------------|-------------|
| glycine.lysopcac182            | 0.001627924  | 0.027245329 | 0.952441364 |
| methionine.creatinine          | 0.000373992  | 0.006263971 | 0.952477453 |
| glutamine.lysopcac140          | -0.000115157 | 0.001931169 | 0.952536783 |
| c3.pcaec321                    | 0.001319084  | 0.022195269 | 0.952695534 |
| c51.pcaac343                   | 0.00144143   | 0.024305833 | 0.95279648  |
| pcaec421.pcaec341              | 0.00182068   | 0.030719649 | 0.952825316 |
| smohc222.smc241                | -0.001286208 | 0.021705456 | 0.952833468 |
| pcaac403.pcaac322              | 0.005893083  | 0.099506786 | 0.952860848 |
| lysopcac280.lysopcac281        | -0.001729994 | 0.029228572 | 0.952888263 |
| pcaac323.pcaac383              | -0.000381975 | 0.006456265 | 0.952908179 |
| c141oh.pcaec446                | -0.001722538 | 0.029150015 | 0.952964787 |
| pcaec444.pcaac360              | 0.002593424  | 0.043901811 | 0.952979822 |
| pcaac323.serotonin             | 0.006321434  | 0.107221584 | 0.953072479 |
| lysopcac160.lysopcac281        | -0.000730823 | 0.012406304 | 0.953111724 |
| asymmetricdimethylarginine.pca | 0.001292986  | 0.021956189 | 0.953126029 |
| pcaac421.pcaec383              | -0.006024732 | 0.102322494 | 0.953133616 |
| citruline.c102                 | -0.002357618 | 0.04004154  | 0.953134044 |
| pcaec404.pcaec341              | -0.001970913 | 0.033559074 | 0.953253016 |
| pcaec443.pcaac344              | 0.003745436  | 0.063821192 | 0.953287405 |
| pcaac344.pcaec363              | 0.001861751  | 0.031799182 | 0.953398122 |
| histidine.isoleucine           | 0.001310679  | 0.022388561 | 0.95340194  |
| pcaec364.pcaec405              | -0.003258276 | 0.055687599 | 0.953427735 |
| pcaec425.pcaec444              | 0.006046445  | 0.103448714 | 0.953476374 |
| pcaac300.pcaac386              | -0.001317471 | 0.02254717  | 0.953489839 |
| arginine.pcaec446              | 0.006716707  | 0.1150105   | 0.953514465 |
| pcaec386.smohc241              | -0.00639051  | 0.109430854 | 0.953516941 |
| ornithine.pcaec383             | 0.003787423  | 0.06497964  | 0.953605502 |
| pcaec382.smohc141              | -0.001799067 | 0.030918684 | 0.953684433 |
| pcaac386.lysopcac281           | -0.000886455 | 0.015241217 | 0.953704583 |
| pcaec380.pcaac344              | -0.00422856  | 0.072759658 | 0.953740262 |
| pcaec322.pcaec384              | 0.003889026  | 0.06692623  | 0.953746361 |
| smohc222.pcaec404              | -0.001102521 | 0.018976053 | 0.953753098 |
| pcaec421.arginine              | 0.003403309  | 0.05861622  | 0.953784744 |
| pcaac342.lysopcac160           | -0.00220041  | 0.03791498  | 0.953805009 |
| pcaec422.pcaac281              | 0.000203599  | 0.00351343  | 0.953873808 |
| pcaec404.pcaac360              | 0.003636723  | 0.062789467 | 0.953897285 |
| pcaac300.pcaec383              | -0.005772788 | 0.099883091 | 0.953995777 |
| isoleucine.ornithine           | 0.002683064  | 0.046429952 | 0.954002207 |
| pcaac385.pcaec386              | 0.000871514  | 0.015087863 | 0.954021909 |
| pcaac364.pcaac321              | -0.001628842 | 0.028247568 | 0.954101023 |
| c142.pcaac240                  | 0.000758976  | 0.013163806 | 0.954106404 |
| pcaac425.pcaac424              | 0.000588809  | 0.01024485  | 0.954251668 |
| c0.smohc241                    | 0.003985026  | 0.06943463  | 0.954316168 |

|                              |              |             |             |
|------------------------------|--------------|-------------|-------------|
| smc240.pcaac281              | 0.000339509  | 0.005920748 | 0.954356097 |
| h1.c18                       | -0.002280844 | 0.039812209 | 0.954397618 |
| smohc241.c4                  | 0.000873887  | 0.015256691 | 0.954406448 |
| smohc221.pcaac401            | 0.002672901  | 0.046696602 | 0.954437624 |
| c101.lysopcac281             | -0.000545803 | 0.009542952 | 0.954473713 |
| pcaac300.histidine           | 0.004000433  | 0.069953475 | 0.954479513 |
| pcaac401.threonine           | -0.001994073 | 0.034885802 | 0.954501014 |
| pcaac402.threonine           | 0.001447924  | 0.025349352 | 0.954533799 |
| creatinine.pcaac381          | 0.004230879  | 0.074149267 | 0.954581377 |
| pcaac404.smohc161            | -0.001252193 | 0.021980041 | 0.954652464 |
| smc180.lysopcac182           | 0.001820306  | 0.031960306 | 0.954663865 |
| c8.c4                        | 0.000392266  | 0.006901545 | 0.954757541 |
| smohc221.c3                  | 0.001465514  | 0.025816653 | 0.954814137 |
| arginine.tyrosine            | -0.004667455 | 0.082309578 | 0.954861939 |
| lysopcac170.pcaac363         | -0.001562385 | 0.027609517 | 0.954955341 |
| c0.pcaac384                  | -0.002113074 | 0.037367777 | 0.954987634 |
| c102.methionine              | -0.003914963 | 0.069254265 | 0.955001738 |
| pcaac300.methioninesulfoxide | -0.001130111 | 0.020031805 | 0.955092753 |
| methionine.pcaac364          | -0.002575871 | 0.045666527 | 0.955100476 |
| pcaac364.taurine             | -0.000784056 | 0.013924302 | 0.955178098 |
| c5.pcaac401                  | 0.004735759  | 0.08431389  | 0.955289653 |
| asparagine.arginine          | -0.001444035 | 0.025726368 | 0.955319591 |
| glycine.tyrosine             | -0.003710545 | 0.066128136 | 0.955334786 |
| pcaac421.lysopcac170         | -0.002579833 | 0.046267272 | 0.955614749 |
| pcaac322.prolinr             | -0.001900141 | 0.034184749 | 0.955753817 |
| pcaac364.smc180              | -0.000864317 | 0.015569982 | 0.955811658 |
| pcaac403.threonine           | 0.001378923  | 0.024950681 | 0.956007106 |
| pcaac342.histidine           | 0.003092746  | 0.055988679 | 0.956028718 |
| pcaac421.prolinr             | -0.001164589 | 0.021089842 | 0.956043329 |
| pcaac421.pcaac422            | -0.002231365 | 0.040421055 | 0.956057139 |
| smohc241.pcaac364            | -0.002621527 | 0.047500377 | 0.956067812 |
| pcaac240.smc260              | 0.001882253  | 0.034232826 | 0.956231412 |
| lysopcac140.pcaac406         | 0.002386717  | 0.043409293 | 0.956233129 |
| pcaac402.c3                  | -0.001514736 | 0.027584948 | 0.956288822 |
| pcaac362.taurine             | 0.003240712  | 0.05904951  | 0.95631301  |
| pcaac443.pcaac420            | 0.001772841  | 0.03235615  | 0.956384417 |
| pcaac422.lysopcac204         | 0.002540459  | 0.046458359 | 0.956471074 |
| alanine.methioninesulfoxide  | 0.001456004  | 0.026709637 | 0.956606421 |
| c16.pcaac385                 | 0.003886146  | 0.071435807 | 0.956695305 |
| pcaac445.h1                  | 0.000427931  | 0.007886049 | 0.956803653 |
| methionine.pcaac360          | -0.000259526 | 0.00478846  | 0.956856235 |
| lysopcac204.c3               | 0.001353732  | 0.025018472 | 0.956926902 |
| lysine.pcaac384              | -0.002154354 | 0.039866897 | 0.95698308  |

|                                 |              |             |             |
|---------------------------------|--------------|-------------|-------------|
| c2.pcaac386                     | 0.001300847  | 0.024116003 | 0.957060552 |
| lysopcac140.threonine           | 0.001726796  | 0.03202138  | 0.957072405 |
| prolinr.pcaec404                | 0.002518616  | 0.046728399 | 0.957094125 |
| alphaaminoadipicacid.lysopcac1t | 0.000640117  | 0.011901119 | 0.957183782 |
| pcaec362.methionine             | 0.002594607  | 0.048273487 | 0.957214184 |
| pcaec423.smc260                 | 0.002124351  | 0.039566237 | 0.957259563 |
| pcaac384.pcaac402               | -0.002705066 | 0.050386836 | 0.957263565 |
| pcaac384.lysopcac170            | 0.000522689  | 0.009737466 | 0.957269778 |
| pcaac381.c4                     | -0.001411024 | 0.026297445 | 0.957287156 |
| pcaac342.pcaac323               | -0.003801283 | 0.070914524 | 0.957328972 |
| pcaac385.c162                   | -0.003834003 | 0.071606354 | 0.957377449 |
| pcaac386.pcaec322               | -0.003161276 | 0.059103734 | 0.957421882 |
| pcaac384.pcaac344               | 0.0044011    | 0.082380841 | 0.957472039 |
| pcaec401.pcaec361               | -0.001321842 | 0.024767138 | 0.957514204 |
| citruline.putrescine            | 0.00226681   | 0.042543494 | 0.957584706 |
| lysopcac181.pcaac343            | 0.000691396  | 0.012982617 | 0.9576059   |
| pcaec424.pcaac300               | 0.003140248  | 0.058998715 | 0.957629615 |
| pcaac401.smohc141               | 0.001824288  | 0.034402497 | 0.957787009 |
| pcaac240.prolinr                | 0.001687841  | 0.031850492 | 0.957814995 |
| pcaac404.c4                     | 0.000935194  | 0.017660493 | 0.957845702 |
| pcaec361.c0                     | 4.41E-05     | 0.000833369 | 0.957858273 |
| pcaec446.pcaac321               | -0.001830478 | 0.034595816 | 0.957880385 |
| c101.smc181                     | -0.001743961 | 0.033031756 | 0.957970972 |
| smohc241.glutamicacid           | 0.00176466   | 0.03344385  | 0.957996132 |
| lysopcac160.pcaec301            | -0.002410418 | 0.045756941 | 0.958064618 |
| arginine.pcaec362               | 0.00085023   | 0.016146244 | 0.958081075 |
| pcaec423.pcaac424               | 0.000609742  | 0.011599204 | 0.958153037 |
| arginine.putrescine             | -0.002628105 | 0.050012898 | 0.958168155 |
| pcaac406.pcaac343               | -0.0022286   | 0.04249843  | 0.958254816 |
| smohc141.pcaac343               | -0.001579975 | 0.03014257  | 0.95827299  |
| pcaac366.pcaac401               | 0.000779723  | 0.014878038 | 0.958280215 |
| pcaac422.phenylalanine          | -0.001654357 | 0.031609487 | 0.958336116 |
| c14.smohc161                    | 0.000566817  | 0.010845884 | 0.958396858 |
| lysopcac281.pcaac404            | 0.000260604  | 0.00498698  | 0.958400198 |
| lysopcac161.smohc222            | -0.00089353  | 0.017107862 | 0.958422118 |
| lysine.smc160                   | 0.004083052  | 0.078208606 | 0.958439646 |
| pcaec403.smohc161               | 0.001517527  | 0.02910068  | 0.958487153 |
| pcaac425.pcaac365               | 0.003603685  | 0.069127323 | 0.958500144 |
| c18.pcaac384                    | -0.003220381 | 0.061832437 | 0.958538908 |
| pcaac422.c141oh                 | 0.00570483   | 0.109756851 | 0.958622742 |
| pcaec403.pcaec341               | -0.001823795 | 0.035124314 | 0.958664878 |
| pcaac320.pcaac240               | 0.001550955  | 0.029887584 | 0.958689575 |
| ornithine.pcaac321              | -0.0013279   | 0.025642313 | 0.958775027 |

|                           |              |             |             |
|---------------------------|--------------|-------------|-------------|
| pcaac321.smc241           | -0.003145455 | 0.060779454 | 0.958801727 |
| isoleucine.pcaec420       | -0.002562389 | 0.049634717 | 0.958902746 |
| smohc221.pcaac281         | 0.000257848  | 0.004996101 | 0.958914684 |
| phenylalanine.pcaec444    | -0.006958509 | 0.134961034 | 0.958954876 |
| pcaac323.lysopcac170      | -0.000553115 | 0.010745623 | 0.959023183 |
| pcaac362.c51              | 0.004009839  | 0.07791077  | 0.959028308 |
| pcaec402.ornithine        | -0.001869288 | 0.036340071 | 0.959050838 |
| lysopcac161.pcaac424      | 0.000286634  | 0.00558467  | 0.959141216 |
| alanine.pcaac343          | -0.001132821 | 0.02207454  | 0.959146878 |
| c3.acetylmithoine         | -0.003665551 | 0.071469782 | 0.959170634 |
| pcaec443.pcaec322         | -0.003479591 | 0.067850258 | 0.9591744   |
| c16.pcaec445              | 0.004373438  | 0.085377057 | 0.959220858 |
| pcaec385.lysopcac204      | -0.001697148 | 0.033148555 | 0.959242124 |
| c101.pcaac323             | 0.004097686  | 0.080171686 | 0.959311211 |
| h1.lysopcac203            | 0.005081652  | 0.099448468 | 0.959321581 |
| lysopcac181.lysopcac140   | 6.94E-05     | 0.001360623 | 0.959402452 |
| smohc222.c181             | 0.000794523  | 0.015592041 | 0.959434037 |
| smc261.pcaec363           | -0.001554148 | 0.030511264 | 0.959450018 |
| c14.smohc241              | -0.003935843 | 0.07728453  | 0.959458135 |
| pcaac381.smohc241         | -0.003192706 | 0.062893935 | 0.959588046 |
| pcaec384.c4               | -0.002258464 | 0.044500175 | 0.959597226 |
| pcaec383.threonine        | -0.001356007 | 0.026758402 | 0.959657573 |
| pcaac383.pcaac343         | 0.001628543  | 0.03219907  | 0.959735998 |
| alphaaminoadipicacid.c142 | 0.002099703  | 0.041611216 | 0.959829301 |
| pcaac425.pcaec402         | 0.002939545  | 0.058482463 | 0.959985453 |
| pcaec301.pcaac322         | 0.003606234  | 0.071757359 | 0.959991628 |
| pcaec360.smohc141         | 0.003841527  | 0.076442252 | 0.95999319  |
| pcaec423.pcaec361         | 0.002467873  | 0.049231044 | 0.960093083 |
| pcaec386.pcaac384         | 0.003230627  | 0.06453229  | 0.960145749 |
| pcaec445.c5               | -0.000605425 | 0.012114018 | 0.960213322 |
| pcaac366.pcaec403         | -0.001260933 | 0.025287044 | 0.960302774 |
| phenylalanine.lysopcac281 | -0.000411028 | 0.008276472 | 0.960463933 |
| c3.histidine              | -0.00359941  | 0.072482089 | 0.960466218 |
| h1.acetylmithoine         | 0.004854366  | 0.097913396 | 0.960530757 |
| pcaac362.pcaec385         | -0.003768987 | 0.07615462  | 0.960599894 |
| c101.pcaac240             | -0.000585865 | 0.01183823  | 0.9606015   |
| glutamicacid.c102         | -0.002654349 | 0.053667186 | 0.960625196 |
| pcaac383.c3               | 0.002703517  | 0.054770528 | 0.960703652 |
| methionine.pcaac380       | 0.002827242  | 0.05737158  | 0.960768344 |
| smc181.c4                 | 0.000841699  | 0.017129907 | 0.960882307 |
| pcaec425.pcaac360         | 0.002281156  | 0.046427029 | 0.960883888 |
| lysopcac204.pcaec444      | 0.00488109   | 0.099512266 | 0.960950782 |
| pcaec422.ornithine        | -0.001869866 | 0.038193104 | 0.961023904 |

|                                |              |             |             |
|--------------------------------|--------------|-------------|-------------|
| methioninesulfoxide.threonine  | 0.001651145  | 0.033755881 | 0.961058829 |
| pcaec381.lysine                | 0.00588096   | 0.120637006 | 0.961190147 |
| c162.smc260                    | -0.001605838 | 0.032947055 | 0.961197511 |
| asparticacid.pcaac380          | -0.003377331 | 0.069312099 | 0.961208276 |
| lysopcac182.pcaec420           | -0.002414142 | 0.049840949 | 0.961438572 |
| c181.pcaec446                  | 0.002773512  | 0.057331254 | 0.961486275 |
| glutamine.pcaac361             | -0.00212979  | 0.044056941 | 0.96151427  |
| pcaac366.lysopcac280           | -0.000603177 | 0.012486965 | 0.961543922 |
| c2.pcaac341                    | 0.00036722   | 0.007604767 | 0.961556923 |
| pcaac341.tyrosine              | -0.003912049 | 0.081050539 | 0.961573916 |
| c2.pcaac384                    | 0.004672142  | 0.096933224 | 0.96162737  |
| pcaec365.lysopcac140           | -5.46E-05    | 0.001137826 | 0.961822118 |
| lysopcac180.pcaec445           | 0.003224392  | 0.067297328 | 0.961855655 |
| h1.lysopcac181                 | 0.005610052  | 0.117342336 | 0.961937872 |
| pcaec362.pcaec341              | -0.005390279 | 0.112752953 | 0.961940398 |
| c142.tyrosine                  | 0.003071227  | 0.064386236 | 0.962024761 |
| smc241.taurine                 | 0.001649457  | 0.034594733 | 0.962041164 |
| c51dc.pcaac343                 | 0.001279491  | 0.026860082 | 0.962076173 |
| pcaac380.pcaec301              | -0.00389948  | 0.081970143 | 0.96212666  |
| c10.pcaac360                   | 0.001716032  | 0.036187379 | 0.962246972 |
| asymmetricdimethylarginine.pca | -0.000269427 | 0.005723967 | 0.962526029 |
| c162.pcaac386                  | 0.000657546  | 0.013975593 | 0.962542207 |
| smohc221.histidine             | -0.002935402 | 0.062477991 | 0.96259522  |
| pcaac403.pcaac424              | -0.001145576 | 0.024424893 | 0.962659656 |
| pcaec444.pcaac425              | 0.00369565   | 0.078950832 | 0.962733218 |
| glycine.pcaec342               | 0.003004643  | 0.064238697 | 0.962762185 |
| pcaac343.pcaec342              | 0.006132611  | 0.131988094 | 0.963008591 |
| glycine.c4                     | -0.000594543 | 0.012803746 | 0.963031093 |
| kynurenine.pcaac343            | -0.001361458 | 0.029332941 | 0.963047888 |
| lysopcac180.lysopcac281        | -0.000825682 | 0.017865743 | 0.963205456 |
| smc181.lysopcac203             | -0.000931881 | 0.020197945 | 0.963267914 |
| pcaec424.valine                | 0.002092256  | 0.045428177 | 0.963332399 |
| c182.glycine                   | 0.00163264   | 0.035476983 | 0.963361554 |
| pcaac364.lysopcac281           | 0.000825793  | 0.017946485 | 0.96336593  |
| c8.c142                        | -0.003173108 | 0.068993057 | 0.963383833 |
| alphaaminoadipicacid.pcaac364  | -0.002486732 | 0.054069806 | 0.963384289 |
| smc180.pcaac322                | -0.004032303 | 0.087687024 | 0.96338903  |
| c51dc.pcaac401                 | -0.000386828 | 0.008418251 | 0.963416092 |
| histidine.lysopcac181          | -0.001829859 | 0.039885632 | 0.963474585 |
| smc240.lysopcac140             | -5.09E-05    | 0.001110592 | 0.963499019 |
| pcaac361.c51dc                 | -0.006112578 | 0.133759314 | 0.963617237 |
| c0.glycine                     | 0.00179869   | 0.039365858 | 0.963622576 |
| pcaac366.smc160                | 0.002103294  | 0.046066279 | 0.96364932  |

|                                |              |             |             |
|--------------------------------|--------------|-------------|-------------|
| lysopcac280.pcaac386           | 0.000832663  | 0.018258688 | 0.963692561 |
| pcaec406.pcaec365              | -0.001273396 | 0.02793965  | 0.963714037 |
| pcaac425.ornithine             | 0.001861856  | 0.04087461  | 0.963734904 |
| pcaac364.pcaec422              | 0.001263317  | 0.027777908 | 0.963791565 |
| pcaec380.pcaac402              | 0.002984052  | 0.065653502 | 0.963813594 |
| pcaac401.pcaec322              | 0.002666797  | 0.05870217  | 0.963831298 |
| putrescine.tyrosine            | -0.00223733  | 0.049297867 | 0.963867393 |
| c8.lysopcac181                 | -0.003682123 | 0.081133922 | 0.9638679   |
| asymmetricdimethylarginine.pca | 0.001323784  | 0.029181941 | 0.96388392  |
| pcaac424.spermidine            | 0.003049092  | 0.067382379 | 0.963973461 |
| pcaac341.pcaac425              | 0.003636048  | 0.080407028 | 0.96399738  |
| pcaac365.pcaec385              | -0.002579134 | 0.057199947 | 0.964101389 |
| pcaac360.lysopcac281           | 0.000736827  | 0.016349668 | 0.964119679 |
| glycine.arginine               | -0.001217368 | 0.027029311 | 0.964141961 |
| lysopcac170.pcaac424           | -0.000201141 | 0.004469553 | 0.96417079  |
| pcaac362.phenylalanine         | -0.002137747 | 0.047538355 | 0.96419758  |
| pcaec384.pcaec321              | -0.003237576 | 0.072129265 | 0.964263734 |
| c141.creatinine                | -0.00215683  | 0.0480779   | 0.964283301 |
| smc240.pcaac401                | 0.001021883  | 0.022784985 | 0.964293015 |
| asparticacid.isoleucine        | -0.001402836 | 0.03132349  | 0.964343545 |
| c51.pcaac424                   | 0.000393527  | 0.008789954 | 0.96435575  |
| pcaec423.pcaac381              | 0.00205301   | 0.045879801 | 0.964373659 |
| pcaec445.smohe222              | -0.000148292 | 0.003315021 | 0.964384911 |
| c182.pcaec321                  | 0.002299452  | 0.051435695 | 0.964407251 |
| pcaec425.pcaac323              | -0.003613768 | 0.080855965 | 0.96441638  |
| c10.pcaec322                   | 0.00257176   | 0.057561216 | 0.964428471 |
| pcaac383.smc261                | -0.002629612 | 0.058912085 | 0.964462283 |
| kynurenine.isoleucine          | -0.000983213 | 0.022052219 | 0.964502498 |
| c18.pcaec384                   | 0.00129091   | 0.028989384 | 0.964546423 |
| pcaec363.pcaec422              | -0.001571621 | 0.035341071 | 0.964594428 |
| lysopcac160.c5                 | -0.000669277 | 0.015070022 | 0.96464134  |
| pcaec404.pcaac421              | -0.000910965 | 0.020532223 | 0.964676018 |
| pcaec380.pcaec360              | 0.000212397  | 0.004791103 | 0.964704703 |
| pcaec380.c102                  | -0.001995431 | 0.045057553 | 0.964740705 |
| pcaec424.lysopcac140           | 8.14E-05     | 0.001842405 | 0.964809062 |
| pcaec364.c4                    | 0.001640036  | 0.037110272 | 0.964814445 |
| pcaac360.pcaec446              | -0.003198741 | 0.072414969 | 0.964831319 |
| pcaac344.lysopcac170           | 0.000591014  | 0.013414443 | 0.964922276 |
| prolinr.pcaec384               | 0.000559442  | 0.012704326 | 0.96494021  |
| pcaac384.glutamicacid          | -0.001970514 | 0.044961432 | 0.965106305 |
| h1.pcaac360                    | -0.00199293  | 0.04551134  | 0.965135763 |
| glycine.c51dc                  | 0.006096574  | 0.139303877 | 0.965155792 |
| pcaec422.pcaec341              | -0.001411272 | 0.032252279 | 0.965161603 |



|                                |              |             |             |
|--------------------------------|--------------|-------------|-------------|
| smohc222.pcaac381              | 0.002066386  | 0.047444914 | 0.965323831 |
| smohc161.smc241                | 0.002841856  | 0.065470877 | 0.965440761 |
| pcaac300.pcaac421              | -0.000871645 | 0.020106704 | 0.965484877 |
| pcaac405.smc261                | -0.001563423 | 0.036161027 | 0.965577142 |
| asymmetricdimethylarginine.pca | 0.004036799  | 0.093417796 | 0.96559521  |
| c14.c51dc                      | 0.005034858  | 0.116584631 | 0.965615914 |
| leucine.pcaac323               | -0.004661922 | 0.108041052 | 0.965645153 |
| pcaac365.pcaac321              | 0.00118509   | 0.027553394 | 0.96575566  |
| methioninesulfoxide.lysopcac18 | -0.00396423  | 0.092324303 | 0.965813396 |
| smc241.c2                      | 0.002196173  | 0.051173187 | 0.965830605 |
| pcaac364.pcaac341              | -0.003836075 | 0.08972275  | 0.965959275 |
| pcaac403.tyrosine              | -0.002974871 | 0.06962476  | 0.965981205 |
| c5.pcaac343                    | -0.005644222 | 0.132616006 | 0.966113739 |
| pcaac443.lysopcac170           | 0.000636347  | 0.014953652 | 0.966118503 |
| c102.pcaac403                  | -0.000209877 | 0.004940554 | 0.966177494 |
| c8.pcaac361                    | -0.000419363 | 0.009874164 | 0.966185279 |
| pcaac406.pcaac385              | 0.003207737  | 0.075650375 | 0.966239865 |
| pcaac403.c141oh                | 0.004119303  | 0.097464409 | 0.966349225 |
| serine.pcaac443                | 0.00265415   | 0.062842285 | 0.966372778 |
| smc241.pcaac420                | 0.000756641  | 0.018005061 | 0.966540928 |
| pcaac385.pcaac343              | -0.004833459 | 0.115130897 | 0.96657394  |
| pcaac382.lysopcac140           | -0.000103032 | 0.002456351 | 0.966603342 |
| glutamicacid.pcaac425          | 0.002926605  | 0.069814746 | 0.966623842 |
| c10.lysopcac281                | -0.000759743 | 0.018127933 | 0.96663139  |
| alanine.pcaac424               | 0.000386193  | 0.009222823 | 0.966660437 |
| c162.pcaac380                  | -0.001673552 | 0.039968626 | 0.966661992 |
| smc261.c162                    | 0.003458213  | 0.083096749 | 0.966864847 |
| pcaac425.c162                  | -0.003047183 | 0.073301639 | 0.966901641 |
| pcaac380.taurine               | -0.002484105 | 0.059842653 | 0.966949265 |
| pcaac422.lysopcac180           | -0.002641653 | 0.063645452 | 0.966953131 |
| histidine.lysine               | 0.005039248  | 0.121436434 | 0.966960101 |
| pcaac380.threonine             | -0.001248673 | 0.030107781 | 0.966978844 |
| pcaac300.pcaac343              | -0.003173881 | 0.076763896 | 0.967080245 |
| pcaac344.serotonin             | 0.004138205  | 0.100287188 | 0.967145866 |
| pcaac421.smc261                | -0.003444236 | 0.083645715 | 0.96721515  |
| kynurenine.pcaac321            | -0.001193808 | 0.028997416 | 0.967220749 |
| asparticacid.c3                | 0.001586742  | 0.038560529 | 0.967236719 |
| pcaac404.pcaac340              | 0.002557374  | 0.062286131 | 0.967309049 |
| pcaac341.threonine             | -0.001218991 | 0.029699835 | 0.967320827 |
| pcaac403.acetylnithoine        | -0.002479409 | 0.060474086 | 0.967355965 |
| citruline.pcaac301             | -0.003192334 | 0.078005518 | 0.967415691 |
| pcaac406.pcaac301              | 0.003575213  | 0.08791233  | 0.967619834 |
| pcaac383.smc260                | -0.00113552  | 0.02793325  | 0.967633143 |

|                        |              |             |             |
|------------------------|--------------|-------------|-------------|
| pcaec420.methionine    | 0.00149568   | 0.036799221 | 0.9676386   |
| smohc161.methionine    | 0.000743414  | 0.01839241  | 0.967817426 |
| pcaac321.lysopcac281   | 0.000581154  | 0.014394074 | 0.967853306 |
| pcaac366.prolinr       | -0.002208103 | 0.054728152 | 0.967875427 |
| methionine.arginine    | -0.001429706 | 0.035458808 | 0.967896558 |
| c14.creatinine         | -0.000403908 | 0.010022311 | 0.967911932 |
| asparagine.pcaec403    | 0.000957559  | 0.023802007 | 0.967968184 |
| arginine.pcaac360      | 0.002867485  | 0.071339014 | 0.967996028 |
| c14.smc241             | 0.003551139  | 0.088507689 | 0.968053971 |
| lysopcac204.pcaac422   | -0.004466769 | 0.111415771 | 0.968078949 |
| pcaac360.c51dc         | 0.005870757  | 0.147003472 | 0.968202145 |
| pcaac240.pcaec444      | 0.007038276  | 0.176919554 | 0.968324562 |
| alanine.creatinine     | -0.000208048 | 0.005236536 | 0.968366226 |
| pcaec380.valine        | 0.002333449  | 0.058932513 | 0.968473438 |
| c141oh.prolinr         | 0.001366265  | 0.034529228 | 0.968494851 |
| c18.leucine            | -0.000308119 | 0.007802636 | 0.968557903 |
| c141.c142              | 0.00261757   | 0.066600779 | 0.968706509 |
| lysopcac140.pcaec384   | 0.001333529  | 0.033943681 | 0.968719149 |
| c16.pcaec322           | 0.002458501  | 0.062742278 | 0.968800632 |
| smc181.pcaec380        | -0.002581426 | 0.065990195 | 0.968852992 |
| pcaac323.ornithine     | -0.001861446 | 0.047599128 | 0.96886223  |
| spermidine.lysopcac182 | -0.002607427 | 0.066752572 | 0.968898564 |
| asparticacid.pcaac363  | 0.000443689  | 0.011428585 | 0.969088223 |
| creatinine.arginine    | -0.001909037 | 0.049361541 | 0.969206131 |
| smohc141.smc241        | -0.003734346 | 0.096580375 | 0.969213226 |
| c181.c4                | 0.001573468  | 0.040752937 | 0.969257587 |
| asparagine.pcaec420    | -0.001586536 | 0.041143744 | 0.969296692 |
| c10.smc260             | 0.001511529  | 0.039218178 | 0.969312023 |
| kynurenine.glutamine   | 0.001258505  | 0.032707588 | 0.969363025 |
| smohc161.lysopcac203   | 0.000628097  | 0.016344859 | 0.969402549 |
| methionine.pcaac425    | -0.002808486 | 0.073175732 | 0.96944056  |
| pcaac362.pcaac404      | -0.000137201 | 0.003581941 | 0.969501368 |
| leucine.pcaac386       | 0.001076799  | 0.028115463 | 0.96950489  |
| pcaec364.pcaac404      | 0.000201235  | 0.005270835 | 0.969600533 |
| c18.taurine            | -0.001635912 | 0.042892414 | 0.969631661 |
| smc260.ornithine       | 0.001425423  | 0.037404845 | 0.969657068 |
| spermidine.lysopcac204 | -0.002023245 | 0.053093203 | 0.969657507 |
| glutamicacid.pcaac384  | -0.002120146 | 0.056132919 | 0.969925971 |
| c2.c102                | -0.002087692 | 0.055542381 | 0.970071393 |
| pcaac341.pcaec380      | 0.00247278   | 0.065795332 | 0.970074945 |
| pcaac361.pcaec383      | -0.002821758 | 0.075087269 | 0.970077488 |
| pcaec382.smc202        | -0.004108367 | 0.109451328 | 0.970112264 |
| pcaec385.pcaac320      | -0.002284995 | 0.060889964 | 0.970119732 |

|                                |              |             |             |
|--------------------------------|--------------|-------------|-------------|
| pcaac402.pcaec406              | 0.001907436  | 0.051034653 | 0.970240161 |
| pcaac385.pcaec384              | 0.003285647  | 0.088096556 | 0.970303303 |
| pcaec340.pcaac421              | -0.00059458  | 0.015944111 | 0.970306841 |
| c3.pcaec360                    | 0.000148142  | 0.003999012 | 0.970503311 |
| lysopcac203.lysopcac160        | 0.000940564  | 0.025508418 | 0.970640201 |
| lysopcac204.glutamicacid       | -0.001739791 | 0.047290259 | 0.970706291 |
| c14.pcaec300                   | -0.002261119 | 0.06148939  | 0.97071992  |
| asparagine.methionine          | 0.001605168  | 0.043836546 | 0.970843601 |
| lysopcac182.pcaec361           | 0.000209833  | 0.005736846 | 0.970875958 |
| pcaac321.pcaec364              | 0.000748508  | 0.020558727 | 0.971009797 |
| c3.lysopcac181                 | -0.001598596 | 0.043927632 | 0.9710231   |
| pcaac426.c101                  | -0.000201691 | 0.005554374 | 0.971086402 |
| asymmetricdimethylarginine.met | -0.001022384 | 0.028245411 | 0.9711784   |
| pcaac406.spermidine            | -0.002559728 | 0.070737172 | 0.971186349 |
| pcaec386.pcaec364              | 0.001023222  | 0.028320326 | 0.971231057 |
| glycine.pcaec364               | 0.001144666  | 0.031711776 | 0.971258421 |
| smohc222.lysopcac140           | 8.05E-05     | 0.002233749 | 0.971310798 |
| c182.creatinine                | -0.000625139 | 0.017367928 | 0.971339635 |
| c102.pcaec420                  | -0.000557216 | 0.015483939 | 0.971345318 |
| pcaec403.tyrosine              | 0.002331266  | 0.064806462 | 0.971356452 |
| pcaec404.c141oh                | 0.003690094  | 0.102589238 | 0.971358957 |
| pcaac420.pcaec365              | 0.001129764  | 0.031411495 | 0.971361366 |
| smc240.pcaac321                | 0.000735707  | 0.020484489 | 0.971402156 |
| pcaec401.pcaec386              | 0.000623248  | 0.017399459 | 0.971478061 |
| c102.lysopcac170               | 0.000938843  | 0.026299285 | 0.971574788 |
| c18.lysopcac281                | -0.000940895 | 0.026377385 | 0.971596999 |
| lysopcac161.pcaac365           | -0.001633778 | 0.045847095 | 0.971624977 |
| serotonin.methioninesulfoxide  | 0.001265447  | 0.035530057 | 0.971640198 |
| leucine.lysopcac170            | 0.0003674    | 0.01032376  | 0.971662809 |
| c3.lysopcac140                 | 8.98E-05     | 0.002536126 | 0.971790817 |
| smohc221.smc261                | -0.00145506  | 0.041465483 | 0.972058363 |
| pcaec422.pcaec445              | -0.002238484 | 0.063805437 | 0.972064649 |
| pcaac383.c2                    | 0.002175443  | 0.062035887 | 0.97207697  |
| c141.pcaac364                  | 0.001601545  | 0.045705588 | 0.972098479 |
| lysopcac161.pcaec301           | -0.001729849 | 0.049379021 | 0.972105166 |
| c18.creatinine                 | -0.000371119 | 0.010611395 | 0.97215167  |
| lysopcac161.lysopcac140        | 6.00E-05     | 0.001720684 | 0.97223574  |
| putrescine.threonine           | 0.000836028  | 0.024050271 | 0.972320362 |
| ornithine.lysopcac160          | -0.000381667 | 0.011019388 | 0.972420441 |
| pcaec360.taurine               | 0.001663177  | 0.048049115 | 0.972437842 |
| pcaac322.pcaac343              | -0.000947532 | 0.027410315 | 0.972474182 |
| c3.pcaac421                    | 0.000894094  | 0.025884377 | 0.972495366 |
| c101.glutamicacid              | 0.001647744  | 0.047875999 | 0.972594795 |

|                                |              |             |             |
|--------------------------------|--------------|-------------|-------------|
| c16.pcaac424                   | 0.000288279  | 0.008376438 | 0.972595937 |
| prolinr.c102                   | -0.000967119 | 0.028121975 | 0.972616094 |
| pcaec443.pcaec301              | 0.004542623  | 0.132156432 | 0.972629681 |
| pcaac401.pcaec385              | 0.00235097   | 0.068661239 | 0.972735498 |
| pcaac363.pcaac424              | 0.000539552  | 0.015790251 | 0.972791387 |
| pcaec445.smc240                | -0.001995277 | 0.058396715 | 0.972793214 |
| pcaec322.asparticacid          | 0.001635628  | 0.047925982 | 0.972824594 |
| h1.pcaac424                    | -0.000554024 | 0.016246271 | 0.972845774 |
| leucine.lysopcac181            | 0.001724911  | 0.050639878 | 0.972877049 |
| smc160.spermidine              | 0.002343026  | 0.068911353 | 0.972926175 |
| smc260.pcaec384                | 0.002476615  | 0.072985446 | 0.972979967 |
| pcaac384.pcaec401              | 0.000972118  | 0.028713677 | 0.9730416   |
| pcaec405.pcaec443              | -0.005718668 | 0.170231542 | 0.973250223 |
| c101.pcaec301                  | -0.001718013 | 0.051307807 | 0.973337017 |
| pcaac401.spermidine            | -0.002275807 | 0.06800297  | 0.973351455 |
| acetylmithoine.pcaec385        | -0.002484767 | 0.07440904  | 0.973409517 |
| putrescine.c101                | 0.000789398  | 0.023641566 | 0.973411969 |
| pcaac363.pcaec402              | -0.001079143 | 0.032349264 | 0.973436754 |
| c18.pcaec446                   | 0.001258744  | 0.037896132 | 0.973550979 |
| pcaec343.pcaec422              | -0.001255159 | 0.037923731 | 0.973645463 |
| pcaec340.c141                  | 0.00120322   | 0.036416599 | 0.973690442 |
| lysopcac180.pcaac380           | 0.002746856  | 0.083230118 | 0.973720114 |
| c51.pcaec386                   | -0.000454955 | 0.013834715 | 0.973814107 |
| pcaac322.pcaec364              | 0.000483266  | 0.014714225 | 0.973847231 |
| smc261.lysopcac204             | 0.00123109   | 0.037559054 | 0.97389977  |
| alphaaminoadipicacid.pcaec340  | 0.00169877   | 0.052334802 | 0.974152732 |
| pcaec404.c0                    | -4.55E-05    | 0.001403179 | 0.974188283 |
| pcaec343.lysopcac140           | -3.33E-05    | 0.001027047 | 0.974189732 |
| pcaac360.smc261                | 0.001319011  | 0.04078319  | 0.974246371 |
| c12.pcaac402                   | 0.00066436   | 0.020599709 | 0.974318855 |
| pcaec322.pcaec422              | 0.001077816  | 0.033419934 | 0.974319065 |
| pcaec421.asymmetricdimethylar; | 0.000965234  | 0.030006447 | 0.974385252 |
| pcaac366.lysopcac281           | 0.000565083  | 0.017595226 | 0.974426502 |
| c0.c14                         | -0.00141562  | 0.044204881 | 0.974499467 |
| pcaac386.pcaac383              | 0.000420903  | 0.013152793 | 0.974517819 |
| pcaac385.pcaac363              | -0.000326483 | 0.010264724 | 0.974672793 |
| pcaec301.histidine             | 0.002544006  | 0.080569645 | 0.974856742 |
| lysopcac182.pcaac424           | 0.000159412  | 0.005051516 | 0.974870981 |
| spermidine.arginine            | 0.002248296  | 0.071335192 | 0.97490283  |
| c12.pcaac425                   | 0.00185978   | 0.05904097  | 0.974916775 |
| asymmetricdimethylarginine.smc | -0.000792448 | 0.025263861 | 0.975022605 |
| asparagine.c2                  | -0.002833123 | 0.090710916 | 0.975129624 |
| lysopcac181.pcaac424           | 0.000129534  | 0.004160632 | 0.97520859  |

|                        |              |             |             |
|------------------------|--------------|-------------|-------------|
| pcaec404.prolinr       | -0.000588892 | 0.019054437 | 0.975389655 |
| smohc141.pcaac300      | -0.002296928 | 0.074526805 | 0.975457812 |
| pcaac380.phenylalanine | 0.001055815  | 0.034284322 | 0.975477176 |
| lysopcac161.pcaac422   | -0.002768297 | 0.090056739 | 0.975522049 |
| pcaec300.c14           | -0.001167261 | 0.038080816 | 0.975591525 |
| pcaac386.smc241        | 0.000956501  | 0.031209717 | 0.975595235 |
| pcaec340.pcaec364      | 0.001239378  | 0.040457332 | 0.975605845 |
| pcaac381.glycine       | 0.000466754  | 0.015239038 | 0.975610134 |
| pcaac366.threonine     | 0.001053149  | 0.034453609 | 0.975659217 |
| citruline.smc260       | -0.000552969 | 0.018149607 | 0.975738724 |
| pcaac365.pcaac425      | -0.003659532 | 0.120914391 | 0.975899374 |
| putrescine.pcaec443    | -0.002234997 | 0.07389344  | 0.975914706 |
| pcaac420.smohc161      | -0.000430558 | 0.014235528 | 0.975915428 |
| pcaac360.pcaac425      | 0.003437181  | 0.113863792 | 0.975962028 |
| c51.c18                | -0.001834213 | 0.061302813 | 0.976173977 |
| pcaac366.pcaec361      | 0.001104558  | 0.036931652 | 0.976183818 |
| pcaec365.lysopcac281   | 0.000721114  | 0.024111227 | 0.9761841   |
| glutamine.glycine      | -0.000809934 | 0.027146566 | 0.976241598 |
| pcaac403.smc202        | 0.002862284  | 0.096108509 | 0.976284417 |
| pcaec361.pcaec380      | 0.001990186  | 0.066966033 | 0.976334137 |
| c141oh.lysopcac170     | 0.000864277  | 0.029162563 | 0.976400078 |
| pcaec385.pcaac321      | -0.000718579 | 0.024354766 | 0.976505037 |
| c18.c141oh             | -0.00279794  | 0.094834347 | 0.976506009 |
| prolinr.c4             | -0.000387696 | 0.013165468 | 0.976550192 |
| c4.pcaac385            | 0.000991328  | 0.033676281 | 0.976558918 |
| pcaac343.pcaac300      | 0.003056584  | 0.10441074  | 0.976688176 |
| pcaec340.pcaec363      | 0.002010301  | 0.068724953 | 0.976706662 |
| c162.pcaac444          | -0.003229836 | 0.110679668 | 0.976762038 |
| c101.lysopcac181       | -0.001579782 | 0.05424065  | 0.976806943 |
| pcaec301.threonine     | -0.000715106 | 0.024613084 | 0.976863896 |
| c51.c14                | 0.001328683  | 0.045732302 | 0.976864206 |
| pcaac240.pcaac424      | -0.000644012 | 0.022171677 | 0.976869684 |
| pcaec443.c14           | 0.001332144  | 0.045897911 | 0.976887639 |
| smc180.glycine         | -0.001907439 | 0.066094983 | 0.97701899  |
| smc160.phenylalanine   | -0.001533568 | 0.053186749 | 0.977039219 |
| alanine.pcaec402       | 0.001680229  | 0.058395542 | 0.977087321 |
| pcaec382.c141oh        | -0.003322315 | 0.11585108  | 0.977163563 |
| pcaac385.taurine       | 0.000620454  | 0.021664062 | 0.977193579 |
| isoleucine.lysopcac140 | -7.47E-05    | 0.002615241 | 0.977253692 |
| pcaac344.pcaec383      | -0.002556715 | 0.089691747 | 0.977300407 |
| pcaec421.histidine     | -0.003744066 | 0.131445361 | 0.977317722 |
| smc202.pcaac381        | -0.001316345 | 0.046269642 | 0.977345097 |
| serotonin.taurine      | -0.000700369 | 0.024625965 | 0.9773524   |

|                        |              |             |             |
|------------------------|--------------|-------------|-------------|
| histidine.pcaec443     | -0.001319616 | 0.046413535 | 0.977359206 |
| pcaec321.pcaec445      | 0.002425724  | 0.085417439 | 0.977385676 |
| c5.pcaac426            | 0.001989669  | 0.070221551 | 0.97743687  |
| smc240.threonine       | 0.000780641  | 0.027602361 | 0.977478649 |
| c182.threonine         | -0.000617485 | 0.021847421 | 0.977493113 |
| pcaac343.lysopcac170   | -0.000369158 | 0.01307239  | 0.977512243 |
| pcaac424.pcaac344      | -0.002128333 | 0.075485659 | 0.977547494 |
| pcaec343.pcaec403      | -0.001089884 | 0.038683218 | 0.977563892 |
| pcaec361.smc160        | -0.003438605 | 0.122050823 | 0.977564729 |
| smohc221.pcaec321      | 0.000685493  | 0.024392094 | 0.977620841 |
| h1.c3                  | -0.001510545 | 0.053777912 | 0.977632388 |
| c141oh.pcaec445        | -0.002489934 | 0.088655766 | 0.977634899 |
| pcaac401.taurine       | 0.001895049  | 0.067834676 | 0.977753618 |
| c162.c4                | -0.001267068 | 0.045435259 | 0.977792594 |
| pcaec300.smc180        | 0.000437864  | 0.015880917 | 0.978043856 |
| ornithine.pcaec363     | 0.000560032  | 0.020340705 | 0.978075027 |
| c141oh.lysopcac160     | 0.000420814  | 0.015294558 | 0.978089853 |
| creatinine.lysopcac140 | -3.42E-05    | 0.001244418 | 0.978095196 |
| pcaac341.pcaec403      | -0.001839118 | 0.066898733 | 0.978108065 |
| smohc161.pcaec420      | -0.000613977 | 0.022346315 | 0.97812043  |
| pcaac380.pcaec386      | 0.000553234  | 0.020157588 | 0.97814439  |
| lysine.pcaec384        | -0.000400308 | 0.014699896 | 0.978314316 |
| pcaec342.pcaac424      | -0.000349187 | 0.012849412 | 0.978359414 |
| pcaec420.pcaec404      | 0.000516     | 0.018990533 | 0.978362538 |
| pcaec444.pcaac343      | 0.00047298   | 0.017450176 | 0.978415764 |
| smc261.smohc161        | -0.000561724 | 0.020733213 | 0.978425006 |
| serotonin.pcaac420     | 0.002656862  | 0.098114699 | 0.978436013 |
| pcaac363.phenylalanine | -0.001355769 | 0.050228199 | 0.97850524  |
| c16.lysopcac281        | -0.000441885 | 0.016375649 | 0.978511553 |
| pcaec443.pcaec341      | -0.000610166 | 0.02268842  | 0.978583996 |
| lysopcac281.pcaec384   | 0.000976549  | 0.036377083 | 0.978622291 |
| pcaac386.pcaec301      | -0.002321137 | 0.086493639 | 0.97862965  |
| smc202.smc261          | 0.001174224  | 0.04381678  | 0.978659451 |
| alanine.c0             | 5.99E-05     | 0.002247677 | 0.97878066  |
| pcaac361.lysopcac140   | -6.21E-05    | 0.002332716 | 0.978804199 |
| pcaec423.valine        | 0.001435842  | 0.054068873 | 0.978852669 |
| pcaac281.pcaec384      | 0.001552838  | 0.058482113 | 0.978855413 |
| c18.pcaac360           | -0.000914452 | 0.034545517 | 0.978920246 |
| putrescine.pcaec301    | 0.001843922  | 0.069739848 | 0.978944863 |
| smc161.lysine          | -0.001473133 | 0.055747266 | 0.978956642 |
| c101.ornithine         | -0.001044174 | 0.039515389 | 0.97895721  |
| glutamine.serotonin    | -0.001631175 | 0.061769411 | 0.978970749 |
| leucine.pcaec382       | -0.000735744 | 0.02793529  | 0.979026523 |

|                        |              |             |             |
|------------------------|--------------|-------------|-------------|
| c2.pcaec343            | -0.001393836 | 0.053047717 | 0.979076119 |
| pcaec301.pcaac281      | -6.11E-05    | 0.002330718 | 0.979108492 |
| pcaac402.c181          | -0.000853903 | 0.032554016 | 0.979111785 |
| lysopcac161.pcaac402   | -0.00093123  | 0.035649288 | 0.979198057 |
| putrescine.pcaac281    | 3.48E-05     | 0.001334492 | 0.979209986 |
| smc180.pcaec364        | 0.001114583  | 0.042703965 | 0.979215376 |
| pcaec383.pcaac403      | 0.000495634  | 0.019079662 | 0.979313428 |
| pcaec406.smc260        | -0.001370668 | 0.052822934 | 0.979336293 |
| smc260.pcaec402        | 0.002366101  | 0.091679688 | 0.97944776  |
| lysopcac180.pcaac386   | -0.000626637 | 0.024280785 | 0.979448075 |
| smohc222.pcaec420      | -0.000477588 | 0.018556805 | 0.979504934 |
| pcaac383.pcaec361      | 0.000266586  | 0.010408939 | 0.979604671 |
| c16.pcaac363           | 0.00056466   | 0.022107206 | 0.979659904 |
| lysopcac281.pcaac421   | 0.000446402  | 0.01750888  | 0.979696631 |
| c4.pcaac341            | 0.000187446  | 0.007357327 | 0.979711219 |
| lysopcac161.pcaec321   | -0.001291302 | 0.050714213 | 0.979723241 |
| pcaec343.pcaac322      | -0.001569199 | 0.061777735 | 0.9797723   |
| pcaac406.pcaec322      | -0.001692015 | 0.066613118 | 0.979772372 |
| pcaec405.pcaac421      | 0.000527518  | 0.020828041 | 0.979830768 |
| smc240.pcaec384        | -0.000676621 | 0.026733228 | 0.979844436 |
| c10.c4                 | 0.000235938  | 0.009361557 | 0.979929868 |
| pcaec385.pcaec402      | -0.001573093 | 0.062468259 | 0.979946219 |
| pcaec424.pcaac421      | 0.000386733  | 0.015360348 | 0.979950156 |
| kynurenine.c102        | -0.001494381 | 0.059358867 | 0.979951724 |
| pcaec383.smc202        | -0.002279137 | 0.091000742 | 0.980055307 |
| kynurenine.lysopcac181 | 0.001601096  | 0.063928284 | 0.980055365 |
| pcaec301.pcaac320      | 0.002078464  | 0.083028144 | 0.980064874 |
| pcaac425.pcaac240      | -0.000470748 | 0.018815265 | 0.980075835 |
| pcaac402.lysopcac182   | -0.002124742 | 0.085066148 | 0.980109235 |
| c51dc.smc181           | -0.00053787  | 0.021679385 | 0.980242463 |
| pcaec382.lysopcac281   | 0.000501741  | 0.020284129 | 0.980301804 |
| pcaec422.pcaac360      | 0.000945218  | 0.038344806 | 0.980369612 |
| pcaac381.pcaac380      | 0.001626499  | 0.066775839 | 0.980602815 |
| c0.pcaec403            | -0.001028976 | 0.042469017 | 0.980705311 |
| pcaac422.lysopcac281   | 0.000510031  | 0.021099221 | 0.9807498   |
| putrescine.pcaac386    | -0.00065444  | 0.027102015 | 0.980770267 |
| pcaac361.pcaec360      | -8.60E-05    | 0.00356171  | 0.980775247 |
| pcaac420.pcaac322      | 0.001498388  | 0.062087641 | 0.98078129  |
| pcaec423.pcaec422      | 0.002308329  | 0.095768441 | 0.98080534  |
| arginine.lysopcac140   | -2.90E-05    | 0.001208092 | 0.980860005 |
| c16.smc160             | 0.003074935  | 0.12864813  | 0.980965638 |
| pcaac362.pcaac385      | -0.000458957 | 0.019285082 | 0.981047941 |
| alanine.pcaac383       | -0.000170654 | 0.007173371 | 0.981054762 |

|                              |              |             |             |
|------------------------------|--------------|-------------|-------------|
| c8.pcaec362                  | 0.000414093  | 0.017454509 | 0.981107171 |
| alanine.pcaec342             | 0.001893893  | 0.079953538 | 0.981136406 |
| glutamicacid.pcaac421        | -0.000563047 | 0.023770729 | 0.981137084 |
| pcaac422.threonine           | -0.000730101 | 0.030900048 | 0.981183858 |
| pcaac322.c162                | -0.001844374 | 0.078278471 | 0.981236506 |
| c141oh.pcaac384              | -0.00159497  | 0.068072208 | 0.981340923 |
| isoleucine.pcaac360          | -0.000709004 | 0.030866581 | 0.981707653 |
| c101.pcaac300                | -0.000692506 | 0.030242757 | 0.981764765 |
| pcaec384.c3                  | 0.000437914  | 0.019126256 | 0.981766561 |
| serine.valine                | -0.001345728 | 0.058864344 | 0.981794004 |
| pcaec363.pcaec384            | 0.000866373  | 0.038023055 | 0.981854554 |
| arginine.lysopcac203         | 0.000253263  | 0.011158661 | 0.981925389 |
| pcaac402.pcaac420            | 0.003760538  | 0.165881309 | 0.981946451 |
| c0.c10                       | 0.00094091   | 0.041521924 | 0.981954011 |
| pcaec445.methioninesulfoxide | 0.000378957  | 0.016724803 | 0.981955744 |
| pcaac342.lysopcac281         | 0.000269104  | 0.011907265 | 0.98200223  |
| pcaac424.pcaac425            | -0.003420375 | 0.151346353 | 0.982002505 |
| leucine.ornithine            | -0.001128612 | 0.049966352 | 0.982012234 |
| c51.threonine                | 0.000670116  | 0.029739971 | 0.982055961 |
| pcaec365.valine              | 0.002081935  | 0.092700805 | 0.982114771 |
| pcaac320.pcaac386            | 0.001184946  | 0.052784733 | 0.982122743 |
| pcaec402.pcaec446            | 0.000865946  | 0.03865255  | 0.982158824 |
| pcaac320.pcaac421            | -0.000424279 | 0.019024401 | 0.982239618 |
| lysopcac140.pcaec362         | -0.0005432   | 0.024370504 | 0.982249677 |
| pcaac383.threonine           | -0.000523819 | 0.023529401 | 0.982271107 |
| pcaac422.pcaec301            | -0.00219514  | 0.098669946 | 0.982283059 |
| glutamine.pcaec385           | 0.001407319  | 0.063307339 | 0.982296868 |
| c2.pcaec321                  | 0.00075531   | 0.034069381 | 0.9823448   |
| lysopcac204.pcaec363         | 0.000505968  | 0.023018275 | 0.982494966 |
| pcaec363.ornithine           | -0.001234291 | 0.056227621 | 0.982518429 |
| smohc221.pcaec421            | 3.22E-05     | 0.001475545 | 0.982604315 |
| smohc221.pcaac425            | -0.001869025 | 0.085635047 | 0.982618934 |
| pcaec425.pcaec341            | -0.000528821 | 0.024259238 | 0.982640225 |
| isoleucine.pcaec382          | -0.000963974 | 0.044273202 | 0.982660468 |
| smohc241.pcaec380            | 0.001029954  | 0.047342573 | 0.982674767 |
| pcaac385.pcaec384            | 0.002503893  | 0.115196328 | 0.98269027  |
| lysopcac203.pcaec384         | -0.000627199 | 0.028866152 | 0.982696662 |
| lysopcac182.pcaec343         | -0.00187726  | 0.086765175 | 0.982769713 |
| asparagine.pcaec362          | -0.000426858 | 0.019758138 | 0.982795129 |
| isoleucine.pcaac363          | 0.000471179  | 0.021854632 | 0.982830562 |
| smc260.pcaec445              | -0.001755268 | 0.081722054 | 0.982895197 |
| pcaac386.pcaac406            | -0.001981934 | 0.092519631 | 0.982940375 |
| pcaac341.pcaec404            | 0.000865429  | 0.040413458 | 0.982946257 |



|                                |              |             |             |
|--------------------------------|--------------|-------------|-------------|
| pcaac361.pcaac341              | -0.00019097  | 0.008973683 | 0.983052396 |
| lysopcac161.valine             | 0.001502649  | 0.070750171 | 0.983086061 |
| pcaec340.pcaac381              | 0.001221309  | 0.057559258 | 0.983102396 |
| pcaac426.pcaac300              | -0.000962187 | 0.04587742  | 0.983297712 |
| pcaac323.pcaac386              | 0.000507091  | 0.024230179 | 0.98333349  |
| c5.spermidine                  | -0.001467279 | 0.07035352  | 0.983391026 |
| smohc222.spermidine            | 0.001436225  | 0.069083391 | 0.983443642 |
| pcaec365.c3                    | -0.00048709  | 0.023587621 | 0.983554694 |
| pcaec446.c162                  | 0.001282613  | 0.062216024 | 0.983582391 |
| alanine.c4                     | -0.000227509 | 0.011060347 | 0.983618764 |
| lysopcac160.isoleucine         | -0.000694537 | 0.033796304 | 0.983633991 |
| smohc141.pcaec322              | -0.002297925 | 0.112172818 | 0.983685826 |
| c51.pcaac380                   | -0.000991642 | 0.048464888 | 0.983705362 |
| pcaac363.pcaac421              | -0.00057026  | 0.028030539 | 0.983798354 |
| pcaac405.pcaac381              | 0.00091679   | 0.045203426 | 0.983848387 |
| smc261.pcaec401                | -0.000758812 | 0.037572752 | 0.983916552 |
| c182.pcaac420                  | 0.002072402  | 0.103147132 | 0.983999447 |
| pcaec445.pcaac380              | 0.001696099  | 0.084598532 | 0.984033616 |
| arginine.pcaac425              | -0.001853874 | 0.092481414 | 0.984035916 |
| c12.pcaac321                   | 0.000413466  | 0.020630704 | 0.984039596 |
| c2.pcaec383                    | -0.00241603  | 0.121576116 | 0.984173941 |
| pcaac365.pcaec340              | 0.000975002  | 0.049121557 | 0.984192899 |
| isoleucine.pcaec401            | 0.002017707  | 0.102298359 | 0.984292441 |
| phenylalanine.lysopcac161      | 0.001946669  | 0.098730292 | 0.984297789 |
| pcaac426.pcaac406              | -0.001838234 | 0.093564915 | 0.98435386  |
| pcaac426.smohc161              | -0.000252034 | 0.01291124  | 0.984454246 |
| pcaec386.valine                | -0.001437443 | 0.073779161 | 0.984484105 |
| pcaac380.lysopcac160           | -0.001198391 | 0.061652285 | 0.984520063 |
| serotonin.lysopcac140          | 0.000107477  | 0.005542219 | 0.984556225 |
| c10.transhydroxyproline        | -0.000708365 | 0.036539735 | 0.984561264 |
| glutamine.smc240               | 0.001198902  | 0.062216369 | 0.984653847 |
| smohc222.c0                    | -2.64E-05    | 0.001373615 | 0.984683943 |
| c141oh.c3                      | 0.001221667  | 0.063677053 | 0.984721152 |
| pcaec321.pcaec446              | -0.001503666 | 0.078455771 | 0.984736736 |
| pcaac383.c141                  | -0.000547402 | 0.028582733 | 0.984748112 |
| asparagine.pcaec342            | -0.001241864 | 0.064968914 | 0.984777384 |
| smohc221.pcaac323              | -0.002452105 | 0.128453521 | 0.984797532 |
| lysopcac280.pcaec343           | -0.001950252 | 0.10230956  | 0.984819169 |
| c102.pcaec422                  | 0.000736614  | 0.038743623 | 0.984858773 |
| pcaec362.pcaac424              | -0.000205337 | 0.010822075 | 0.984889543 |
| c141oh.pcaac365                | -0.00058253  | 0.030969166 | 0.985020036 |
| c16.pcaac300                   | 0.000962768  | 0.051273839 | 0.985046328 |
| c101.asymmetricdimethylarginin | -0.000224825 | 0.011980591 | 0.985055289 |

|                           |              |             |             |
|---------------------------|--------------|-------------|-------------|
| lysopcac280.pcaec443      | 0.001748195  | 0.093175375 | 0.985057934 |
| pcaec364.pcaec321         | -0.001214009 | 0.065189477 | 0.98516913  |
| pcaac420.pcaec380         | 0.001209003  | 0.065067157 | 0.985202515 |
| acetylmethionine          | 0.000390704  | 0.021032567 | 0.985206277 |
| c51.c4                    | 0.00022633   | 0.012267854 | 0.985307468 |
| pcaac403.pcaec322         | 0.001282421  | 0.069590111 | 0.985324063 |
| pcaac361.pcaec402         | 0.000562135  | 0.030570486 | 0.985355963 |
| pcaac362.lysopcac281      | -0.000258592 | 0.014069035 | 0.985362257 |
| citruiline.methionine     | 0.000553521  | 0.030235304 | 0.985420502 |
| asparticacid.pcaec385     | 0.001388865  | 0.075974234 | 0.985441489 |
| pcaac365.prolinr          | -0.000744291 | 0.040722321 | 0.985444294 |
| smohc241.tyrosine         | 0.001546823  | 0.085007704 | 0.985508749 |
| smohc141.pcaac425         | -0.001335772 | 0.073447177 | 0.985516265 |
| pcaec380.pcaec424         | -0.000615852 | 0.034002202 | 0.98557575  |
| lysopcac281.histidine     | 0.001462984  | 0.081289082 | 0.98566719  |
| pcaac404.ornithine        | -0.000241497 | 0.013452192 | 0.985703057 |
| smohc221.smc161           | 0.002453732  | 0.137020969 | 0.985738533 |
| c16.lysopcac182           | -0.001324606 | 0.07455961  | 0.985851587 |
| pcaec444.pcaec364         | 0.000386018  | 0.02187454  | 0.985946215 |
| pcaac343.pcaac424         | -0.000291006 | 0.016496887 | 0.985951665 |
| c0.c8                     | -0.000822578 | 0.046638234 | 0.985953775 |
| pcaac405.smc241           | 0.000550539  | 0.031305248 | 0.98599458  |
| pcaec420.pcaec445         | 0.000993829  | 0.056667952 | 0.986033124 |
| pcaec401.pcaec444         | -0.003216886 | 0.183804321 | 0.98606185  |
| pcaac240.tyrosine         | -0.00126925  | 0.072530901 | 0.986063639 |
| pcaec425.pcaec445         | -0.001677048 | 0.0961055   | 0.986102952 |
| pcaec445.glycine          | -0.000706697 | 0.040665379 | 0.986160068 |
| pcaac380.pcaac422         | -0.000825681 | 0.047520468 | 0.986162508 |
| pcaac341.smc241           | 0.00046812   | 0.027331384 | 0.986359782 |
| pcaec384.pcaec402         | 0.001017202  | 0.060217466 | 0.986547233 |
| pcaac360.tyrosine         | -0.001030215 | 0.061485752 | 0.986656168 |
| c10.lysopcac140           | 2.65E-05     | 0.001581017 | 0.986656172 |
| smohc222.pcaac323         | 0.00198698   | 0.118654692 | 0.986663691 |
| c14.methionine            | -0.000315547 | 0.018870078 | 0.986682669 |
| acetylmethionine.pcaac321 | -0.00062478  | 0.037571914 | 0.986756859 |
| pcaec321.pcaac424         | 0.000492266  | 0.029618512 | 0.986763782 |
| pcaec422.lysopcac281      | -0.000202825 | 0.012264318 | 0.986829393 |
| smc180.pcaec380           | -0.000996408 | 0.0602564   | 0.986830732 |
| asparagine.pcaac384       | 0.000722502  | 0.043707963 | 0.986835444 |
| serine.leucine            | 0.000170158  | 0.010344349 | 0.986899849 |
| isoleucine.lysopcac170    | 0.000166471  | 0.010210166 | 0.987015214 |
| pcaec300.pcaac363         | -0.000168894 | 0.010409734 | 0.98707878  |
| pcaac426.pcaec383         | 0.001406379  | 0.087158148 | 0.987149411 |

|                                |              |             |             |
|--------------------------------|--------------|-------------|-------------|
| pcaac366.pcaac343              | 0.000893794  | 0.055510932 | 0.987177061 |
| pcaac424.pcaac404              | 0.000218335  | 0.013577049 | 0.98719303  |
| lysopcac160.methioninesulfoxid | -0.000620251 | 0.038699667 | 0.987235939 |
| pcaac401.pcaac281              | -4.44E-05    | 0.002778687 | 0.987288508 |
| c142.pcaac344                  | -0.000743203 | 0.046643038 | 0.987310348 |
| pcaec360.creatinine            | -0.000139741 | 0.008778392 | 0.987322337 |
| smohc241.pcaac424              | 0.000129224  | 0.008127463 | 0.987337565 |
| acetylmithoine.pcaec386        | -0.000140618 | 0.009055712 | 0.987633492 |
| asymmetricdimethylarginine.pca | -0.000477583 | 0.030781546 | 0.987643696 |
| pcaec424.smc202                | 0.001399972  | 0.0903572   | 0.987660811 |
| smc241.pcaac366                | -0.001022478 | 0.06630801  | 0.987719436 |
| glycine.lysopcac170            | 0.000347251  | 0.022639646 | 0.987784685 |
| lysopcac182.pcaec446           | 0.000515546  | 0.033618123 | 0.987786954 |
| methionine.threonine           | -0.000423959 | 0.027850692 | 0.987876758 |
| pcaac425.pcaec403              | 0.000362675  | 0.024025778 | 0.987978162 |
| putrescine.c4                  | -0.000142159 | 0.009418571 | 0.987979521 |
| c3.leucine                     | 0.00023881   | 0.016043693 | 0.988145596 |
| pcaec364.pcaac365              | 0.000547496  | 0.03682888  | 0.988160767 |
| c141.pcaac321                  | -0.000507408 | 0.034158951 | 0.98817001  |
| pcaec405.lysopcac170           | 0.000177315  | 0.012102448 | 0.988331812 |
| pcaec340.pcaac425              | -0.001608826 | 0.109901685 | 0.988341665 |
| c4.pcaec363                    | 0.000223766  | 0.015321695 | 0.988368932 |
| smc241.pcaec360                | 8.44E-05     | 0.005896105 | 0.988598461 |
| pcaec423.ornithine             | 0.0006415    | 0.04558672  | 0.98879295  |
| spermidine.lysopcac280         | -0.000797006 | 0.057062124 | 0.988876364 |
| c14.smc180                     | -0.000136698 | 0.009809073 | 0.988901453 |
| c8.pcaac240                    | 0.000254281  | 0.018296678 | 0.988931848 |
| c3.pcaec406                    | 0.000722664  | 0.052154859 | 0.988964921 |
| pcaec421.c51                   | 0.002005911  | 0.146612242 | 0.989103793 |
| pcaac421.c18                   | -0.000521737 | 0.038703502 | 0.989264166 |
| pcaac402.pcaec422              | 0.000937603  | 0.069632827 | 0.989276429 |
| c141.pcaec342                  | -0.000872561 | 0.064848921 | 0.989284128 |
| smc180.methionine              | 0.000299499  | 0.022316652 | 0.989311902 |
| arginine.pcaec361              | -0.000123868 | 0.009329325 | 0.989425906 |
| methionine.lysopcac182         | -0.000316134 | 0.023818155 | 0.989429437 |
| pcaac402.h1                    | -8.47E-05    | 0.006497167 | 0.989621993 |
| pcaac401.pcaec340              | 0.000722298  | 0.056161534 | 0.989757333 |
| c0.pcaec364                    | 0.000393531  | 0.030809154 | 0.989827321 |
| c14.pcaac321                   | -0.000368739 | 0.028966141 | 0.989861729 |
| pcaec301.pcaec446              | -0.000897017 | 0.070853967 | 0.989917404 |
| smc241.pcaac322                | 0.000684407  | 0.054261725 | 0.989954836 |
| pcaec340.tyrosine              | 0.000670481  | 0.053589049 | 0.990035704 |
| pcaec322.c18                   | 0.00032859   | 0.026267634 | 0.99003748  |

|                                |              |             |             |
|--------------------------------|--------------|-------------|-------------|
| pcaec342.pcaac323              | -0.001229977 | 0.09844534  | 0.99004966  |
| pcaac361.lysopcac281           | -0.000355517 | 0.028577726 | 0.990092389 |
| c141.tyrosine                  | 0.001316959  | 0.106095383 | 0.990114194 |
| smohc222.c141                  | -0.000365587 | 0.029488818 | 0.990126523 |
| pcaac323.c0                    | 1.33E-05     | 0.001089172 | 0.990252711 |
| smohc221.c141                  | -0.000611224 | 0.04995997  | 0.9902565   |
| pcaec365.c16                   | -0.00049307  | 0.040376717 | 0.990274446 |
| pcaec363.pcaac343              | -0.000298476 | 0.024496115 | 0.990296034 |
| lysopcac280.pcaec341           | -0.000859401 | 0.070715159 | 0.990321233 |
| pcaec341.pcaac421              | -0.000179637 | 0.014811037 | 0.99034064  |
| pcaac344.pcaec402              | -0.000304243 | 0.02513201  | 0.990358834 |
| methionine.lysopcac160         | -0.00052247  | 0.043181399 | 0.990363897 |
| pcaac402.pcaec363              | -0.000452103 | 0.037768019 | 0.990466547 |
| smc160.glycine                 | -0.000388974 | 0.032529488 | 0.990476853 |
| pcaec361.lysopcac140           | 1.67E-05     | 0.001398577 | 0.990509371 |
| smc261.pcaec384                | -0.000858553 | 0.072124771 | 0.99051975  |
| c141oh.pcaac425                | -0.000690593 | 0.058345904 | 0.990573533 |
| pcaec361.pcaac361              | 0.0004849    | 0.041015621 | 0.990584564 |
| c182.pcaac402                  | 0.000248335  | 0.021064474 | 0.990610874 |
| arginine.pcaac424              | 8.19E-05     | 0.006968621 | 0.990637492 |
| ornithine.pcaac364             | 0.000551353  | 0.047111226 | 0.990679419 |
| h1.pcaec322                    | 0.000474926  | 0.040681402 | 0.990702459 |
| asymmetricdimethylarginine.phe | 0.000433293  | 0.03744722  | 0.990784903 |
| c51.smc181                     | 0.000259231  | 0.022436604 | 0.990798313 |
| c16.smc161                     | -0.000870085 | 0.075869874 | 0.990866642 |
| c181.glycine                   | 0.000429157  | 0.03779897  | 0.990957787 |
| smohc161.pcaac321              | -0.000271523 | 0.02413546  | 0.991040369 |
| c12.pcaac364                   | -0.000444894 | 0.039789461 | 0.991095134 |
| c101.pcaac364                  | -0.000252095 | 0.022571704 | 0.991105161 |
| pcaac421.ornithine             | -0.000274247 | 0.024802902 | 0.99119401  |
| smohc161.pcaac424              | -0.000114513 | 0.01036441  | 0.991200657 |
| pcaec384.pcaec342              | 0.001362036  | 0.123742322 | 0.991233848 |
| pcaac300.pcaec322              | -0.000599939 | 0.055022144 | 0.991316223 |
| serine.pcaec446                | 0.000420462  | 0.038731123 | 0.991354192 |
| isoleucine.smc261              | -0.000751454 | 0.069407545 | 0.991377464 |
| pcaec363.pcaac424              | -0.000165737 | 0.015319065 | 0.991383586 |
| pcaac405.pcaac321              | 0.000457821  | 0.042411187 | 0.991402859 |
| pcaac420.pcaec420              | -0.000396938 | 0.037149971 | 0.991490509 |
| serotonin.phenylalanine        | 0.000763069  | 0.072102389 | 0.991571431 |
| pcaac341.phenylalanine         | 0.000505679  | 0.047987675 | 0.991607629 |
| serotonin.pcaec422             | 0.000426286  | 0.040559058 | 0.991629467 |
| lysopcac204.c51dc              | -0.001376685 | 0.132402649 | 0.991719102 |
| pcaec380.lysopcac204           | 0.001127398  | 0.108650176 | 0.991736073 |

|                                 |              |             |             |
|---------------------------------|--------------|-------------|-------------|
| pcaac322.pcaac404               | 3.36E-05     | 0.00326046  | 0.991785072 |
| glycine.smc160                  | -0.001001658 | 0.097185009 | 0.991791572 |
| c8.asymmetricdimethylarginine   | 0.000107411  | 0.010579709 | 0.991914384 |
| putrescine.pcaac420             | 0.000835944  | 0.084018876 | 0.992076071 |
| isoleucine.alphaaminoadipicacid | -0.000214516 | 0.021852073 | 0.99218179  |
| citruline.lysopcac161           | -0.000892776 | 0.091747319 | 0.992250216 |
| pcaec301.pcaec401               | -0.000283045 | 0.029180373 | 0.992274885 |
| smc261.taurine                  | 0.000342255  | 0.03537239  | 0.992294045 |
| smohc221.ornithine              | -0.000436166 | 0.045372631 | 0.992344055 |
| pcaac380.pcaac321               | 0.000349503  | 0.036725161 | 0.992420714 |
| methioninesulfoxide.pcaac380    | 0.000718513  | 0.076468011 | 0.992516652 |
| smc180.smc161                   | 0.000965864  | 0.102943962 | 0.992527665 |
| pcaec342.pcaac402               | 0.00028335   | 0.030383834 | 0.992572869 |
| pcaec363.pcaac322               | 0.000644504  | 0.069384947 | 0.992602215 |
| pcaec383.pcaac360               | 0.000662555  | 0.072410239 | 0.992712759 |
| lysopcac161.pcaec401            | -0.000798676 | 0.087300739 | 0.992713918 |
| pcaac362.pcaec360               | 5.46E-05     | 0.006005566 | 0.99275383  |
| pcaac322.c14                    | 0.000524588  | 0.057836538 | 0.992776334 |
| asymmetricdimethylarginine.pca  | -0.000282771 | 0.031545013 | 0.992860866 |
| serine.alanine                  | -0.000410491 | 0.045795669 | 0.992861275 |
| lysopcac181.pcaec403            | 0.000366641  | 0.040986026 | 0.992875626 |
| pcaec384.pcaac425               | -0.000708859 | 0.079452342 | 0.992894498 |
| ornithine.pcaac386              | 0.000341683  | 0.038306843 | 0.992896232 |
| pcaac366.c2                     | 0.000834378  | 0.094367735 | 0.992958237 |
| pcaec301.pcaac386               | 0.000200083  | 0.023026606 | 0.993079736 |
| pcaec380.ornithine              | -0.000512949 | 0.059489571 | 0.993132863 |
| serotonin.c14                   | -0.000423261 | 0.050142801 | 0.993277333 |
| asparticacid.pcaec405           | -0.001118206 | 0.132722619 | 0.993290052 |
| smohc221.spermidine             | 0.000583841  | 0.069488095 | 0.993308456 |
| pcaac426.lysopcac281            | -6.35E-05    | 0.007579949 | 0.993327966 |
| pcaac384.pcaac320               | -0.000688742 | 0.083461316 | 0.993427755 |
| pcaac322.lysopcac140            | 1.38E-05     | 0.001685532 | 0.993473555 |
| pcaec362.pcaec322               | -0.000828425 | 0.101175912 | 0.993478933 |
| pcaac420.pcaec341               | -0.000261032 | 0.032371762 | 0.993578008 |
| pcaec421.lysopcac204            | 0.000622146  | 0.077257903 | 0.993586541 |
| lysopcac160.pcaac424            | -4.29E-05    | 0.005330912 | 0.99359214  |
| pcaac380.smc161                 | -0.00077363  | 0.09897088  | 0.993774579 |
| pcaec381.smohc141               | -0.000322801 | 0.041416188 | 0.993792624 |
| smc181.pcaac341                 | -4.52E-05    | 0.005820445 | 0.993818989 |
| methionine.pcaac404             | 8.66E-05     | 0.011193255 | 0.993838516 |
| lysopcac204.pcaac322            | 0.000570542  | 0.074643082 | 0.993912469 |
| pcaec402.leucine                | 0.000214065  | 0.028197586 | 0.993953884 |
| c141.pcaac425                   | -0.00048987  | 0.064658951 | 0.993966138 |

|                                |              |             |             |
|--------------------------------|--------------|-------------|-------------|
| pcaec404.c181                  | 0.000172384  | 0.022784208 | 0.993974306 |
| pcaec405.asparticacid          | 0.000505849  | 0.067605969 | 0.994040921 |
| pcaac386.pcaec403              | 0.000189296  | 0.025493129 | 0.994086258 |
| c3.kynurenine                  | 0.000412514  | 0.056076962 | 0.994141341 |
| c0.pcaec382                    | 6.02E-05     | 0.008229311 | 0.994177326 |
| lysopcac160.pcaac381           | 0.000334821  | 0.046169005 | 0.994224282 |
| pcaac380.pcaac344              | 0.000366308  | 0.052292816 | 0.994421106 |
| lysopcac181.pcaec401           | 0.000412483  | 0.059008039 | 0.994432774 |
| pcaec322.pcaec446              | -0.00029995  | 0.043933745 | 0.99456256  |
| smc161.c8                      | 0.000287607  | 0.04297608  | 0.994670118 |
| leucine.taurine                | -0.000282079 | 0.042203289 | 0.994676853 |
| pcaac380.pcaac343              | -0.000253894 | 0.038059312 | 0.994687056 |
| pcaec443.pcaac402              | -0.000494325 | 0.074237036 | 0.994696823 |
| glutamine.pcaac421             | 6.49E-05     | 0.009772202 | 0.994707156 |
| lysopcac280.pcaac363           | 0.000222182  | 0.034514752 | 0.99487318  |
| pcaac300.lysopcac140           | -6.73E-06    | 0.001052556 | 0.994911159 |
| smohc161.pcaec383              | 0.000430915  | 0.068591348 | 0.994996583 |
| pcaac320.acetylnithoine        | 0.000317414  | 0.051138037 | 0.995056588 |
| smohc241.pcaac321              | 0.000164447  | 0.026616021 | 0.995079277 |
| c12.lysopcac280                | -7.94E-05    | 0.012929704 | 0.995111677 |
| pcaec383.pcaac421              | 0.000120997  | 0.019756026 | 0.995122228 |
| c182.pcaec446                  | -0.00045116  | 0.074296247 | 0.99516375  |
| lysopcac181.methioninesulfoxid | 0.000459811  | 0.079032345 | 0.995366392 |
| smc241.lysopcac140             | -6.79E-06    | 0.001169063 | 0.995374485 |
| smc160.pcaec321                | 0.000257763  | 0.04495799  | 0.995433762 |
| c3.pcaec444                    | -0.00046811  | 0.083221739 | 0.995520226 |
| pcaac361.c3                    | 0.000202725  | 0.036496937 | 0.995576199 |
| pcaac240.histidine             | -0.000505731 | 0.091320879 | 0.995589426 |
| serotonin.isoleucine           | -8.76E-05    | 0.015892432 | 0.995610912 |
| c16.smc240                     | -0.000140768 | 0.02568765  | 0.995635589 |
| arginine.pcaec341              | 0.000244241  | 0.045184519 | 0.995694986 |
| c5.pcaac361                    | 0.000613393  | 0.113798695 | 0.995707139 |
| ornithine.serotonin            | -0.000515391 | 0.095893886 | 0.995719532 |
| pcaac281.pcaec321              | 0.000210633  | 0.03928012  | 0.995729297 |
| phenylalanine.pcaec384         | 0.000111458  | 0.021055959 | 0.995784167 |
| pcaac341.pcaec401              | -0.000384599 | 0.07288076  | 0.995797178 |
| pcaac323.spermidine            | 0.00036136   | 0.068609414 | 0.995805294 |
| pcaac366.lysine                | 0.000600139  | 0.11412514  | 0.995811906 |
| acetylnithoine.pcaec422        | -0.000167978 | 0.032328434 | 0.995861782 |
| alanine.glutamicacid           | -0.000289219 | 0.056549087 | 0.995926689 |
| c8.ornithine                   | 0.000219131  | 0.043196422 | 0.995959817 |
| pcaec405.transhydroxyproline   | 0.000477282  | 0.094167847 | 0.995963381 |
| arginine.c51                   | 0.000473087  | 0.094638627 | 0.996018764 |

|                           |              |             |             |
|---------------------------|--------------|-------------|-------------|
| pcaec383.c162             | -0.000513871 | 0.110692507 | 0.996302723 |
| pcaec404.smc160           | 0.000277637  | 0.061459256 | 0.996402206 |
| ornithine.pcaec384        | 8.72E-05     | 0.019565315 | 0.996451301 |
| lysopcac204.smc261        | 0.00018857   | 0.044129229 | 0.996596757 |
| c181.smc240               | -0.000117245 | 0.028185693 | 0.996687074 |
| pcaac342.pcaac404         | 1.37E-05     | 0.003334329 | 0.99672079  |
| citruline.spermidine      | 0.000288487  | 0.070338831 | 0.996733543 |
| lysine.c5                 | 9.07E-05     | 0.02249236  | 0.996788768 |
| pcaec422.pcaac320         | -0.000505552 | 0.134245409 | 0.997000746 |
| ornithine.threonine       | 0.000101376  | 0.026950246 | 0.997004148 |
| glutamine.pcaac383        | -6.67E-05    | 0.017947954 | 0.997039209 |
| pcaec361.tryptophan       | -0.000376498 | 0.10391107  | 0.997114323 |
| pcaac383.serotonin        | 0.000322224  | 0.089466308 | 0.997131565 |
| pcaec386.pcaac424         | -4.81E-05    | 0.013404706 | 0.997140321 |
| pcaec383.pcaac424         | -0.000110844 | 0.031415923 | 0.997189975 |
| creatinine.phenylalanine  | 0.000160876  | 0.045835779 | 0.997204661 |
| lysopcac280.lysopcac140   | -5.14E-06    | 0.001469053 | 0.997214752 |
| pcaac403.c8               | -0.000210443 | 0.06210485  | 0.997301292 |
| pcaec423.pcaec384         | 0.000113901  | 0.033827696 | 0.997318358 |
| asparticacid.c4           | -0.000161244 | 0.048152459 | 0.997333074 |
| pcaec363.pcaec343         | 0.000304175  | 0.091280174 | 0.997346046 |
| pcaec300.pcaac240         | 7.18E-05     | 0.022039353 | 0.997406366 |
| c2.taurine                | -0.000231146 | 0.073565986 | 0.997497603 |
| pcaac404.lysopcac161      | 0.000314182  | 0.10010924  | 0.997500497 |
| pcaac321.taurine          | 5.33E-05     | 0.017142414 | 0.997523919 |
| pcaec363.pcaac421         | -4.26E-05    | 0.014282132 | 0.997623242 |
| pcaac383.smc160           | 0.000263534  | 0.089230672 | 0.99764783  |
| pcaac381.pcaac365         | 0.000163006  | 0.055217947 | 0.997648898 |
| phenylalanine.threonine   | -6.08E-05    | 0.020724842 | 0.997665123 |
| pcaec444.pcaac421         | -3.70E-05    | 0.013517364 | 0.997818175 |
| pcaec401.c18              | 0.00011989   | 0.044080141 | 0.997833853 |
| pcaec364.serotonin        | 0.000256412  | 0.094424222 | 0.997837272 |
| c142.glutamine            | -0.000113698 | 0.042572225 | 0.997872968 |
| smc181.pcaec425           | 8.55E-05     | 0.032548648 | 0.99790884  |
| phenylalanine.lysopcac182 | 4.73E-05     | 0.018475014 | 0.997958851 |
| pcaac402.acetylnithoine   | 0.000143151  | 0.062032838 | 0.998162111 |
| pcaec446.pcaac402         | -9.01E-05    | 0.039315476 | 0.998174773 |
| pcaac322.pcaec401         | 7.39E-05     | 0.032756487 | 0.998202034 |
| lysopcac161.c162          | 0.000186595  | 0.083545426 | 0.998221207 |
| pcaac383.pcaec342         | -0.000247153 | 0.110765891 | 0.998222923 |
| c51.arginine              | -4.35E-05    | 0.0195613   | 0.99822812  |
| pcaec425.pcaec420         | -7.59E-05    | 0.034724412 | 0.998259147 |
| pcaec360.asparticacid     | -0.000192435 | 0.092722398 | 0.998347099 |

|                        |              |             |             |
|------------------------|--------------|-------------|-------------|
| pcaec360.pcaac383      | 1.82E-05     | 0.00929858  | 0.998437573 |
| pcaac424.smohc161      | -4.20E-05    | 0.023487123 | 0.998577363 |
| c16.pcaec364           | 5.20E-05     | 0.030429057 | 0.998638224 |
| pcaac381.methionine    | 0.000108183  | 0.066701432 | 0.998708275 |
| smc260.pcaec362        | 3.22E-05     | 0.020323111 | 0.9987379   |
| smc161.c181            | -1.63E-05    | 0.01059192  | 0.998775978 |
| c2.pcaac300            | 0.000102385  | 0.07068618  | 0.99884642  |
| pcaec361.pcaac383      | 0.000156467  | 0.117577428 | 0.998940143 |
| pcaec401.pcaac343      | 4.38E-05     | 0.033434697 | 0.998956216 |
| pcaec404.taurine       | -0.000112629 | 0.085981132 | 0.998956732 |
| c4.smc160              | 9.96E-05     | 0.077857463 | 0.998981217 |
| pcaec343.c8            | -4.67E-05    | 0.038660019 | 0.999037017 |
| alanine.pcaac380       | 5.19E-05     | 0.045558818 | 0.999092413 |
| pcaac401.pcaac424      | 1.09E-05     | 0.013849169 | 0.999374247 |
| c181.pcaec444          | 6.55E-05     | 0.085245258 | 0.999388141 |
| pcaac406.lysopcac281   | 1.02E-05     | 0.013532481 | 0.99939983  |
| smc160.pcaac424        | -5.61E-06    | 0.010365294 | 0.999568911 |
| pcaec381.c141oh        | 3.76E-05     | 0.082335311 | 0.999635912 |
| pcaec385.phenylalanine | -1.20E-05    | 0.031075857 | 0.99969304  |
| pcaec361.pcaac425      | 2.73E-05     | 0.10981328  | 0.999801822 |
| pcaec403.pcaec420      | -3.56E-06    | 0.038041056 | 0.99992541  |
| pcaac404.pcaec404      | -2.72E-06    | 0.03720354  | 0.999941688 |
| c181.pcaec341          | -2.52E-06    | 0.049968345 | 0.999959771 |



**Supplementary Table 3.** List of metabolites determined using the Biocrates AbsoluteIDQ kit

| Metabolite class                     | Number | Metabolite name or abbreviation                                                                                                                                                                                                                                                    | Biological relevance (selected examples)                                                                                                          |
|--------------------------------------|--------|------------------------------------------------------------------------------------------------------------------------------------------------------------------------------------------------------------------------------------------------------------------------------------|---------------------------------------------------------------------------------------------------------------------------------------------------|
| Amino acids                          | 21     | Alanine, arginine, asparagine, aspartate, citrulline, glutamine, glutamate, glycine, histidine, isoleucine, leucine, lysine, methionine, ornithine, phenylalanine, proline, serine, threonine, tryptophan, tyrosine, valine                                                        | Amino acid metabolism, urea-cycle, activity of gluconeogenesis and glycolysis, insulin sensitivity, neurotransmitter metabolism, oxidative stress |
| Carnitine                            | 1      | C0                                                                                                                                                                                                                                                                                 |                                                                                                                                                   |
| Acylcarnitine                        | 25     | C2, C3, C3:1, C4, C4:1, C5, C5:1, C6(or C4:1-DC), C6:1, C8, C9, C10, C10:1, C10:2, C12, C12:1, C14, C14:1, C14:2, C16, C16:1, C16:2, C18, C18:1, C18:2                                                                                                                             | Energy metabolism, fatty acid transport and mitochondrial fatty acid oxidation, ketosis, oxidative stress, mitochondrial membrane damage          |
| Hydroxy- and dicarboxyacylcarnitines | 14     | C3-OH, C4-OH(or C3-DC), C5:1-DC, C5-DC(or C6-OH), C5-M-DC, C5-OH(or C3-DC-M), C7-DC, C12-DC, C14:1-OH, C14:2-OH, C16:1-OH, C16:2-OH, C16-OH, C18:1-OH                                                                                                                              |                                                                                                                                                   |
| Biogenic amines                      | 19     | acetylmethionine, asymmetric dimethylarginine, total dimethylarginine, alpha-Aminoadipic acid, carnosine, creatinine, histamine, kynurenine, methioninesulfoxide, nitrotyrosine, hydroxyproline, phenylethylamine, putrescine, sarcosine, serotonin, spermidine, spermine, taurine |                                                                                                                                                   |
| Lyso-phosphatidylcholines            | 14     | lysoPC a C14:0/C16:0/C16:1/C17:0/C18:0/C18:1/C18:2/C20:3/C20:4/C26:0/C26:1/C28:0/C28:1                                                                                                                                                                                             | Degradation of phospholipids, membrane damage, signalling cascades, fatty acid profile                                                            |
| Diacyl-phosphatidylcholines          | 38     | PC aa C24:0/C26:0/C28:1/C30:0/C30:2/C32:0/C32:1/C32:2/C32:3/C34:1/C34:2/C34:3/C34:4/C36:0/C36:1/C36:2/C36:3/C36:4/C36:5/C36:6/C38:0/C38:1/C38:3/C38:4/C38:5/C38:6/C40:1/C40:2/C40:3/C40:4/C40:5/C40:6/C42:0/C42:1/C42:2/C42:4/C42:5/C42:6                                          | Dyslipidaemia, membrane composition and damage, fatty acid profile, activity of desaturases                                                       |
| Acyl-alkyl-phosphatidylcholines      | 38     | PC ae C30:0/C30:2/C32:1/C32:2/C34:0/C34:1/C34:2/C34:3/C36:0/C36:1/C36:2/C36:3/C36:4/C36:5/C38:0/C38:1/C38:2/C38:3/C38:4/C38:5/C38:6/C40:1/C40:2/C40:3/C40:4/C40:5/C40:6/C42:0/C42:1/C42:2/C42:3/C42:4/C42:5/C44:3/C44:4/C44:5/C44:6                                                |                                                                                                                                                   |
| Sphingomyelins                       | 10     | SM C16:0, SM C16:1, SM C18:0, SM C18:1, SM C20:2, SM C22:3, SM C24:0, SM C24:1, SM C26:0, SM C26:1                                                                                                                                                                                 | Signalling cascades, membrane damage (eg, neurodegeneration)                                                                                      |
| Hydroxysphingomyelins                | 5      | SM (OH) C14:1, SM (OH) C16:1, SM (OH) C22:1, SM (OH) C22:2, SM (OH) C24:1                                                                                                                                                                                                          |                                                                                                                                                   |
| Hexose                               | 1      | H1                                                                                                                                                                                                                                                                                 | Carbohydrate metabolism                                                                                                                           |
| Total                                | 186    |                                                                                                                                                                                                                                                                                    |                                                                                                                                                   |

**Supplementary Figure 1.** Serum LCAT levels between low and high lysoPC18:2/PC44:3 ratio

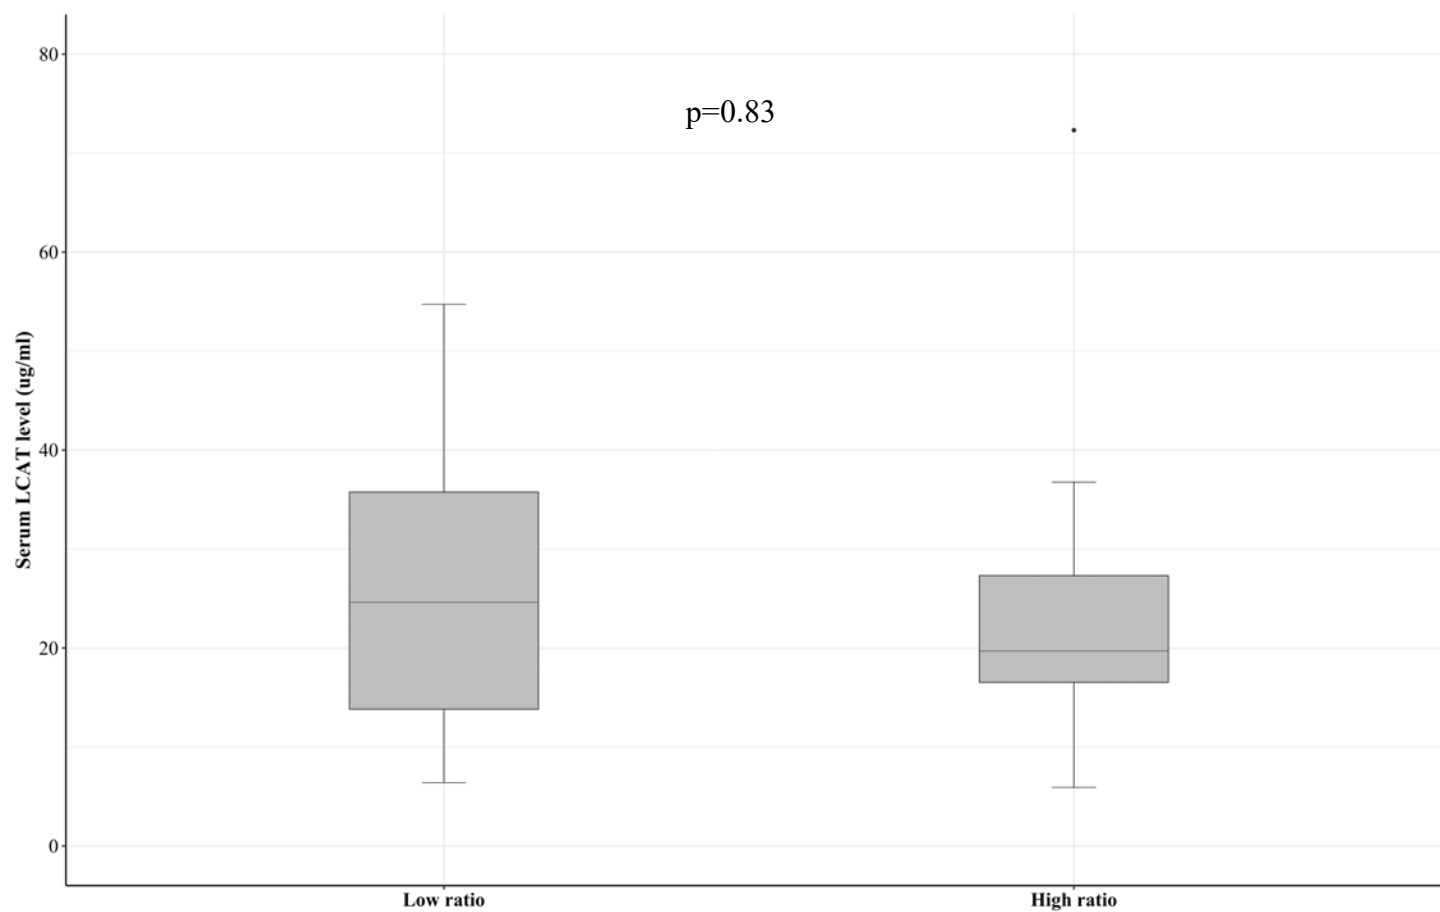

LCAT: lecithin-cholesterol acyltransferase. Low ratio: Bottom 10% of patients on the serum ratio levels; High ratio: Top 10% of patients on the serum ratio levels.

p value was obtained from Student's t test.

**Supplementary Figure 2.**  $PLA_2G5$  expression levels in human subchondral bone.

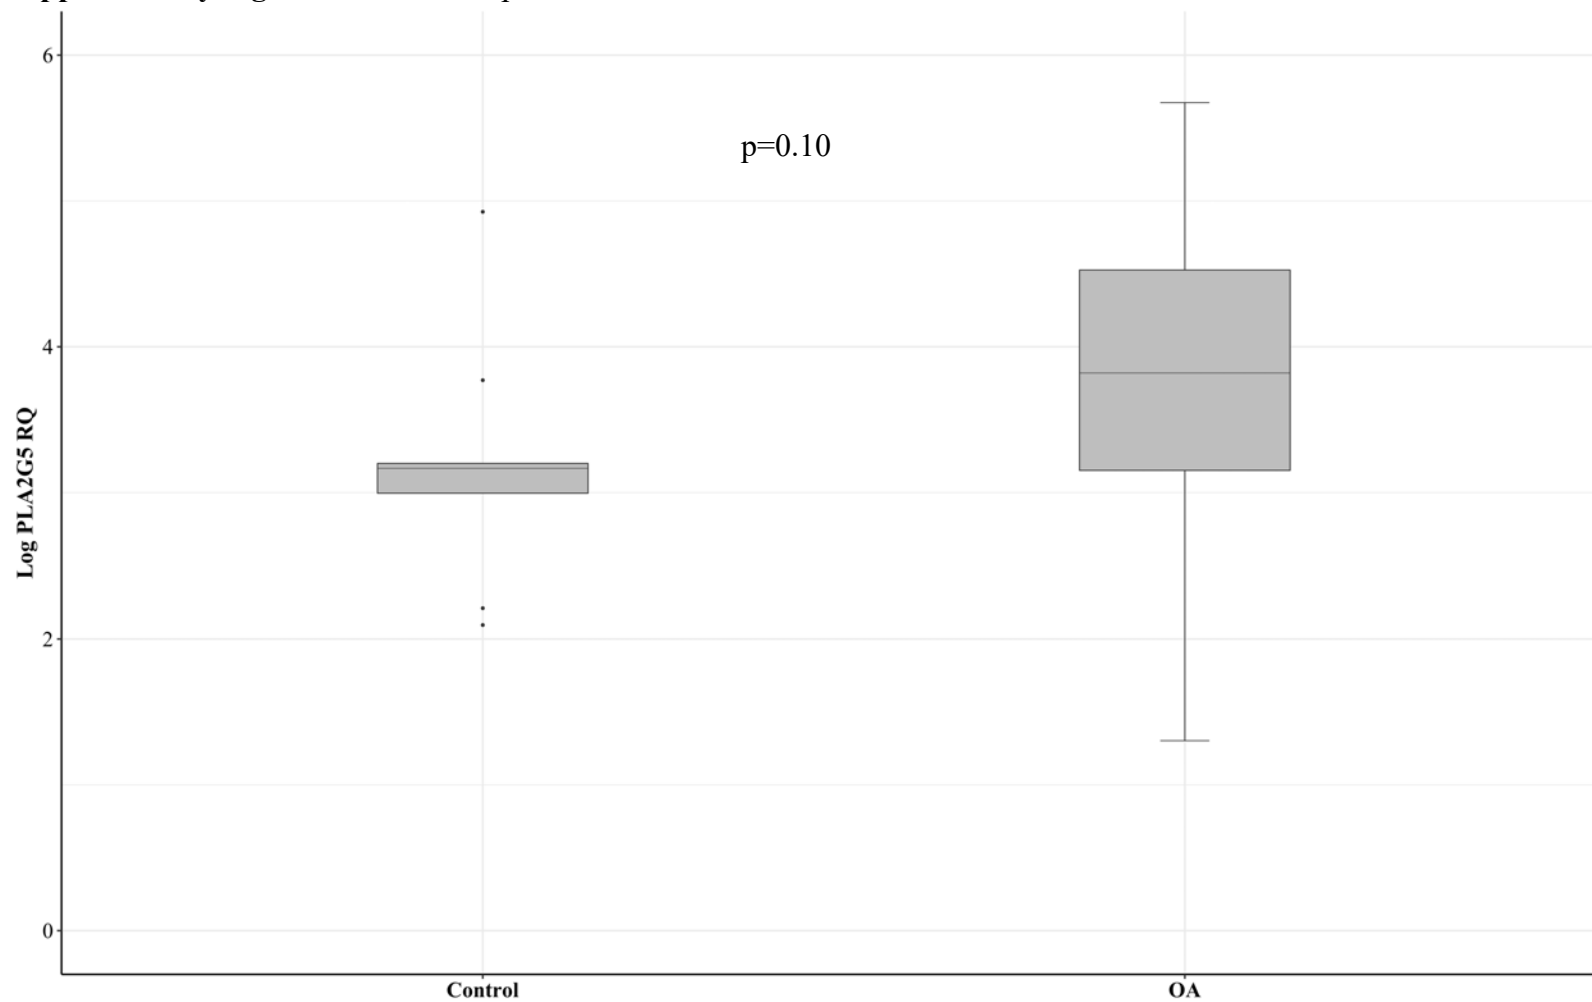

$PLA_2G5$ : Phospholipase A<sub>2</sub> group 5. Log  $PLA_2G5$  RQ: Natural logarithm transformed relative quantification of  $PLA_2G5$  expression.

p value was obtained by Student's t test.
